# Supplementary material for: Population-scale proteome variation in human induced pluripotent stem cells
Source: eLife. 2020 Aug 10;9:e57390. doi: 10.7554/eLife.57390 (PMC7447446; doi:10.7554/eLife.57390)
Supplement: Figure 1—source data 1. — The public ids, TMT batch, donor, gender, age and growth media for the HipSci iPSC lines used in this study are shown. [file elife-57390-fig1-data1.xls]

	Public name	batch	channel	Donor	Gender	Age	feederfree
HPSI0114i-iisa_1@PT6379@8	HPSI0114i-iisa_1	PT6379	8	iisa	male	55-59	N
HPSI0114i-iisa_3@PT6379@9	HPSI0114i-iisa_3	PT6379	9	iisa	male	55-59	N
HPSI0114i-kolf_2@PT6983@5	HPSI0114i-kolf_2	PT6983	5	kolf	male	55-59	N
HPSI0114i-vabj_3@PT6984@5	HPSI0114i-vabj_3	PT6984	5	vabj	female	50-54	N
HPSI0115i-aion_3@PT6385@8	HPSI0115i-aion_3	PT6385	8	aion	Male	60-64	y
HPSI0115i-hecn_6@PT7422@7	HPSI0115i-hecn_6	PT7422	7	hecn	Female	60-64	Y
HPSI0115i-iiyk_2@PT6386@4	HPSI0115i-iiyk_2	PT6386	4	iiyk	Female	50-54	Y
HPSI0115i-iiyk_4@PT6385@1	HPSI0115i-iiyk_4	PT6385	1	iiyk	Female	50-54	Y
HPSI0115i-qoog_4@PT6386@7	HPSI0115i-qoog_4	PT6386	7	qoog	Female	45-49	Y
HPSI0214i-kucg_2@PT6984@9	HPSI0214i-kucg_2	PT6984	9	kucg	male	65-69	Y
HPSI0214i-poih_2@PT6383@3	HPSI0214i-poih_2	PT6383	3	poih	Female	70-74	Y
HPSI0214i-poih_4@PT6383@9	HPSI0214i-poih_4	PT6383	9	poih	Female	70-74	Y
HPSI0214i-rayr_1@PT6377@3	HPSI0214i-rayr_1	PT6377	3	rayr	male	75-79	Y
HPSI0215i-fawm_2@PT6384@7	HPSI0215i-fawm_2	PT6384	7	fawm	Female	70-74	Y
HPSI0215i-fawm_4@PT6384@8	HPSI0215i-fawm_4	PT6384	8	fawm	Female	70-74	Y
HPSI0215i-yoch_6@PT7422@2	HPSI0215i-yoch_6	PT7422	2	yoch	Female	60-64	Y
HPSI0216i-aiid_6@PT6390@6	HPSI0216i-aiid_6	PT6390	6	aiid	Male	50-54	Y
HPSI0216i-boho_3@PT6391@8	HPSI0216i-boho_3	PT6391	8	boho	Female	45-49	Y
HPSI0216i-dacv_6@PT6392@5	HPSI0216i-dacv_6	PT6392	5	dacv	Male	70-74	Y
HPSI0216i-tony_5@PT6390@8	HPSI0216i-tony_5	PT6390	8	tony	Female	0-4	Y
HPSI0216i-vieg_3@PT6391@7	HPSI0216i-vieg_3	PT6391	7	vieg	Male	40-44	Y
HPSI0216i-vieg_5@PT6391@9	HPSI0216i-vieg_5	PT6391	9	vieg	Male	40-44	Y
HPSI0216i-xanu_5@PT6392@2	HPSI0216i-xanu_5	PT6392	2	xanu	Female	45-49	Y
HPSI0216i-xanu_6@PT6391@3	HPSI0216i-xanu_6	PT6391	3	xanu	Female	45-49	Y
HPSI0314i-bubh_3@PT6374@0	HPSI0314i-bubh_3	PT6374	0	bubh	female	35-39	Y
HPSI0314i-fafq_1@PT6984@8	HPSI0314i-fafq_1	PT6984	8	fafq	male	60-64	Y
HPSI0314i-kujn_5@PT6392@1	HPSI0314i-kujn_5	PT6392	1	kujn	Female	15-19	Y
HPSI0314i-sojd_3@PT6387@2	HPSI0314i-sojd_3	PT6387	2	sojd	female	45-49	Y
HPSI0316i-ierp_4@PT6392@9	HPSI0316i-ierp_4	PT6392	9	ierp	Female	40-44	Y
HPSI0316i-qeti_1@PT6392@8	HPSI0316i-qeti_1	PT6392	8	qeti	Male	5-9	Y
HPSI0316i-qeti_2@PT6391@5	HPSI0316i-qeti_2	PT6391	5	qeti	Male	5-9	Y
HPSI0413i-yotv_2@PT6984@2	HPSI0413i-yotv_2	PT6984	2	yotv	male*	55-59	N
HPSI0414i-cekz_1@PT6387@5	HPSI0414i-cekz_1	PT6387	5	cekz	Male	5-9	Y
HPSI0414i-eafb_1@PT6377@9	HPSI0414i-eafb_1	PT6377	9	eafb	male	25-29	Y
HPSI0414i-eevy_6@PT6374@7	HPSI0414i-eevy_6	PT6374	7	eevy	Male	15-19	Y
HPSI0414i-eevy_7@PT6374@6	HPSI0414i-eevy_7	PT6374	6	eevy	Male	15-19	Y
HPSI0414i-fixm_2@PT6983@2	HPSI0414i-fixm_2	PT6983	2	fixm	male	25-29	Y
HPSI0414i-fuai_1@PT6376@7	HPSI0414i-fuai_1	PT6376	7	fuai	female	45-49	Y
HPSI0414i-hutq_1@PT6376@8	HPSI0414i-hutq_1	PT6376	8	hutq	female	25-29	Y
HPSI0414i-kefk_2@PT6376@9	HPSI0414i-kefk_2	PT6376	9	kefk	Male	20-24	Y
HPSI0414i-lavd_2@PT6377@2	HPSI0414i-lavd_2	PT6377	2	lavd	male	40-44	Y
HPSI0414i-niim_3@PT6392@4	HPSI0414i-niim_3	PT6392	4	niim	Female	35-39	Y
HPSI0414i-oaqd_2@PT6383@6	HPSI0414i-oaqd_2	PT6383	6	oaqd	Male	55-59	y
HPSI0414i-oaqd_3@PT6383@5	HPSI0414i-oaqd_3	PT6383	5	oaqd	Male	55-59	y
HPSI0414i-oikd_2@PT7422@6	HPSI0414i-oikd_2	PT7422	6	oikd	Female	40-44	Y
HPSI0414i-oikd_5@PT6389@6	HPSI0414i-oikd_5	PT6389	6	oikd	Female	40-44	Y
HPSI0414i-oulr_2@PT7428@2	HPSI0414i-oulr_2	PT7428	2	oulr	Male	15-19	Y
HPSI0414i-oulr_4@PT7428@7	HPSI0414i-oulr_4	PT7428	7	oulr	Male	15-19	Y
HPSI0414i-puvg_1@PT6983@3	HPSI0414i-puvg_1	PT6983	3	puvg	female	45-49	Y
HPSI0414i-reng_4@PT6376@3	HPSI0414i-reng_4	PT6376	3	reng	Male	40-44	Y
HPSI0414i-sebn_3@PT6380@8	HPSI0414i-sebn_3	PT6380	8	sebn	Female	65-69	Y
HPSI0414i-sebn_4@PT6380@9	HPSI0414i-sebn_4	PT6380	9	sebn	Female	65-69	Y
HPSI0414i-seru_1@PT6384@5	HPSI0414i-seru_1	PT6384	5	seru	Female	65-69	Y
HPSI0414i-seru_7@PT6384@2	HPSI0414i-seru_7	PT6384	2	seru	Female	65-69	Y
HPSI0414i-tout_1@PT6387@4	HPSI0414i-tout_1	PT6387	4	tout	female	15-19	Y
HPSI0414i-walu_1@PT6374@8	HPSI0414i-walu_1	PT6374	8	walu	Male	35-39	Y
HPSI0414i-wize_1@PT6377@8	HPSI0414i-wize_1	PT6377	8	wize	Female	45-49	Y
HPSI0414i-xojn_3@PT6384@3	HPSI0414i-xojn_3	PT6384	3	xojn	Female	50-54	Y
HPSI0414i-xugr_2@PT6377@7	HPSI0414i-xugr_2	PT6377	7	xugr	female	25-29	Y
HPSI0414i-zazi_4@PT6384@4	HPSI0414i-zazi_4	PT6384	4	zazi	Female	25-29	Y
HPSI0414i-zazi_5@PT6384@6	HPSI0414i-zazi_5	PT6384	6	zazi	Female	25-29	Y
HPSI0416i-fiwt_3@PT6390@4	HPSI0416i-fiwt_3	PT6390	4	fiwt	Female	40-44	Y
HPSI0416i-mefc_1@PT6390@9	HPSI0416i-mefc_1	PT6390	9	mefc	Female	35-39	Y
HPSI0416i-mefc_2@PT6390@1	HPSI0416i-mefc_2	PT6390	1	mefc	Female	35-39	Y
HPSI0513i-fejf_2@PT6387@8	HPSI0513i-fejf_2	PT6387	8	fejf	male*	55-59	N
HPSI0513i-giuf_1@PT6983@6	HPSI0513i-giuf_1	PT6983	6	giuf	female*	unknown	N
HPSI0513i-oibg_1@PT6983@7	HPSI0513i-oibg_1	PT6983	7	oibg	female*	unknown	N
HPSI0514i-aecv_2@PT7430Strontium@3	HPSI0514i-aecv_2	PT7430Strontium	3	aecv	Female	60-64	Y
HPSI0514i-aecv_3@PT7430Strontium@4	HPSI0514i-aecv_3	PT7430Strontium	4	aecv	Female	60-64	Y
HPSI0514i-aomr_5@PT7431Strontium@5	HPSI0514i-aomr_5	PT7431Strontium	5	aomr	Male	40-44	Y
HPSI0514i-aomr_6@PT7431Strontium@6	HPSI0514i-aomr_6	PT7431Strontium	6	aomr	Male	40-44	Y
HPSI0514i-eoxi_6@PT6375@5	HPSI0514i-eoxi_6	PT6375	5	eoxi	Male	20-24	Y
HPSI0514i-kooz_5@PT6391@2	HPSI0514i-kooz_5	PT6391	2	kooz	Female	40-44	Y
HPSI0514i-kuco_1@PT6379@1	HPSI0514i-kuco_1	PT6379	1	kuco	Female	65-69	Y
HPSI0514i-letw_1@PT6389@5	HPSI0514i-letw_1	PT6389	5	letw	Male	70-74	Y
HPSI0514i-mure_4@PT7431Strontium@3	HPSI0514i-mure_4	PT7431Strontium	3	mure	Male	50-54	Y
HPSI0514i-mure_9@PT7431Strontium@4	HPSI0514i-mure_9	PT7431Strontium	4	mure	Male	50-54	Y
HPSI0514i-naah_4@PT6385@2	HPSI0514i-naah_4	PT6385	2	naah	Male	55-59	Y
HPSI0514i-puie_4@PT6381@5	HPSI0514i-puie_4	PT6381	5	puie	Male	60-64	Y
HPSI0514i-puie_5@PT6381@4	HPSI0514i-puie_5	PT6381	4	puie	Male	60-64	Y
HPSI0514i-pulk_1@PT6375@3	HPSI0514i-pulk_1	PT6375	3	pulk	Female	50-54	Y
HPSI0514i-qajt_2@PT6390@2	HPSI0514i-qajt_2	PT6390	2	qajt	Male	65-69	Y
HPSI0514i-qajt_5@PT6390@3	HPSI0514i-qajt_5	PT6390	3	qajt	Male	65-69	Y
HPSI0514i-sohd_3@PT6389@8	HPSI0514i-sohd_3	PT6389	8	sohd	Female	70-74	Y
HPSI0514i-tavh_2@PT6392@6	HPSI0514i-tavh_2	PT6392	6	tavh	Male	55-59	Y
HPSI0514i-toco_5@PT6379@2	HPSI0514i-toco_5	PT6379	2	toco	Female	55-59	Y
HPSI0613i-bawa_1@PT6984@3	HPSI0613i-bawa_1	PT6984	3	bawa	female	unknown	N
HPSI0613i-bohf_1@PT6983@1	HPSI0613i-bohf_1	PT6983	1	bohf	male	unknown	N
HPSI0613i-febc_1@PT6387@6	HPSI0613i-febc_1	PT6387	6	febc	female	unknown	N
HPSI0613i-giuo_5@PT6983@8	HPSI0613i-giuo_5	PT6983	8	giuo	male*	50-54	N
HPSI0613i-hegp_3@PT6983@4	HPSI0613i-hegp_3	PT6983	4	hegp	female	55-59	N
HPSI0613i-nukw_1@PT6984@7	HPSI0613i-nukw_1	PT6984	7	nukw	female	unknown	N
HPSI0613i-ueah_1@PT6380@1	HPSI0613i-ueah_1	PT6380	1	ueah	male	55-59	N
HPSI0613i-ueah_4@PT6380@2	HPSI0613i-ueah_4	PT6380	2	ueah	male	55-59	N
HPSI0613i-zisa_33@PT6379@7	HPSI0613i-zisa_33	PT6379	7	zisa	male	unknown	Y
HPSI0614i-ciwj_1@PT7428@4	HPSI0614i-ciwj_1	PT7428	4	ciwj	Female	35-39	Y
HPSI0614i-ciwj_2@PT7428@9	HPSI0614i-ciwj_2	PT7428	9	ciwj	Female	35-39	Y
HPSI0614i-denw_6@PT6385@9	HPSI0614i-denw_6	PT6385	9	denw	Male	45-49	y
HPSI0614i-dixh_2@PT6376@1	HPSI0614i-dixh_2	PT6376	1	dixh	Female	75-79	Y
HPSI0614i-eavo_1@PT6377@4	HPSI0614i-eavo_1	PT6377	4	eavo	Female	30-34	Y
HPSI0614i-eisk_3@PT7430Strontium@1	HPSI0614i-eisk_3	PT7430Strontium	1	eisk	Unknown	30-34	Y
HPSI0614i-eisk_6@PT7430Strontium@2	HPSI0614i-eisk_6	PT7430Strontium	2	eisk	Unknown	30-34	Y
HPSI0614i-fovu_2@PT6382@1	HPSI0614i-fovu_2	PT6382	1	fovu	Male	35-39	Y
HPSI0614i-fovu_5@PT6382@9	HPSI0614i-fovu_5	PT6382	9	fovu	Male	35-39	Y
HPSI0614i-foyj_1@PT6377@5	HPSI0614i-foyj_1	PT6377	5	foyj	Female	50-54	Y
HPSI0614i-gawh_12@PT6389@4	HPSI0614i-gawh_12	PT6389	4	gawh	Female	30-34	Y
HPSI0614i-gawh_7@PT7430Strontium@9	HPSI0614i-gawh_7	PT7430Strontium	9	gawh	Female	30-34	Y
HPSI0614i-guyj_2@PT6375@6	HPSI0614i-guyj_2	PT6375	6	guyj	Female	50-54	Y
HPSI0614i-kecw_3@PT6390@7	HPSI0614i-kecw_3	PT6390	7	kecw	Female	25-29	Y
HPSI0614i-kecw_4@PT6390@5	HPSI0614i-kecw_4	PT6390	5	kecw	Female	25-29	Y
HPSI0614i-koqx_1@PT6375@8	HPSI0614i-koqx_1	PT6375	8	koqx	Female	25-29	Y
HPSI0614i-laig_2@PT6392@3	HPSI0614i-laig_2	PT6392	3	laig	Female	25-29	Y
HPSI0614i-lepk_1@PT6386@2	HPSI0614i-lepk_1	PT6386	2	lepk	Female	60-64	Y
HPSI0614i-lepk_4@PT7422@8	HPSI0614i-lepk_4	PT7422	8	lepk	Female	60-64	Y
HPSI0614i-lipl_2@PT6392@7	HPSI0614i-lipl_2	PT6392	7	lipl	Male	50-54	Y
HPSI0614i-lipl_5@PT6391@4	HPSI0614i-lipl_5	PT6391	4	lipl	Male	50-54	Y
HPSI0614i-liqa_1@PT7428@3	HPSI0614i-liqa_1	PT7428	3	liqa	Female	65-69	Y
HPSI0614i-liqa_6@PT7428@8	HPSI0614i-liqa_6	PT7428	8	liqa	Female	65-69	Y
HPSI0614i-mesr_4@PT7431Strontium@9	HPSI0614i-mesr_4	PT7431Strontium	9	mesr	Male	50-54	Y
HPSI0614i-miaj_4@PT6383@4	HPSI0614i-miaj_4	PT6383	4	miaj	Male	50-54	Y
HPSI0614i-miaj_6@PT6383@8	HPSI0614i-miaj_6	PT6383	8	miaj	Male	50-54	Y
HPSI0614i-paab_3@PT6381@2	HPSI0614i-paab_3	PT6381	2	paab	Male	70-74	Y
HPSI0614i-paab_4@PT6381@6	HPSI0614i-paab_4	PT6381	6	paab	Male	70-74	Y
HPSI0614i-voxu_1@PT7431Strontium@7	HPSI0614i-voxu_1	PT7431Strontium	7	voxu	Female	65-69	Y
HPSI0614i-voxu_2@PT7431Strontium@8	HPSI0614i-voxu_2	PT7431Strontium	8	voxu	Female	65-69	Y
HPSI0614i-zoio_1@PT6381@3	HPSI0614i-zoio_1	PT6381	3	zoio	Female	75-79	Y
HPSI0614i-zoio_2@PT6381@7	HPSI0614i-zoio_2	PT6381	7	zoio	Female	75-79	Y
HPSI0713i-aehn_2@PT6380@4	HPSI0713i-aehn_2	PT6380	4	aehn	female	unknown	N
HPSI0713i-aehn_22@PT6380@3	HPSI0713i-aehn_22	PT6380	3	aehn	female	unknown	Y
HPSI0713i-terl_1@PT6983@9	HPSI0713i-terl_1	PT6983	9	terl	Male	60-64	N
HPSI0714i-fasu_2@PT6374@5	HPSI0714i-fasu_2	PT6374	5	fasu	Female	20-24	Y
HPSI0714i-gibe_2@PT6374@3	HPSI0714i-gibe_2	PT6374	3	gibe	Male	35-39	Y
HPSI0714i-iudw_1@PT6383@2	HPSI0714i-iudw_1	PT6383	2	iudw	Female	50-54	Y
HPSI0714i-iudw_4@PT6383@1	HPSI0714i-iudw_4	PT6383	1	iudw	Female	50-54	Y
HPSI0714i-keui_4@PT6385@4	HPSI0714i-keui_4	PT6385	4	keui	Female	50-54	Y
HPSI0714i-kute_4@PT6389@2	HPSI0714i-kute_4	PT6389	2	kute	Female	25-29	Y
HPSI0714i-lutt_6@PT6374@1	HPSI0714i-lutt_6	PT6374	1	lutt	Female	0-4	Y
HPSI0714i-mitg_4@PT6375@9	HPSI0714i-mitg_4	PT6375	9	mitg	Male	5-9	Y
HPSI0714i-nufh_3@PT6386@3	HPSI0714i-nufh_3	PT6386	3	nufh	Female	55-59	Y
HPSI0714i-nufh_4@PT7422@1	HPSI0714i-nufh_4	PT7422	1	nufh	Female	55-59	Y
HPSI0714i-oebj_1@PT6374@4	HPSI0714i-oebj_1	PT6374	4	oebj	Male	0-4	Y
HPSI0714i-oojs_1@PT6375@4	HPSI0714i-oojs_1	PT6375	4	oojs	Male	5-9	Y
HPSI0714i-ouzk_4@PT7430Strontium@5	HPSI0714i-ouzk_4	PT7430Strontium	5	ouzk	Male	35-39	Y
HPSI0714i-ouzk_5@PT7430Strontium@6	HPSI0714i-ouzk_5	PT7430Strontium	6	ouzk	Male	35-39	Y
HPSI0714i-pirs_1@PT6375@2	HPSI0714i-pirs_1	PT6375	2	pirs	Male	5-9	Y
HPSI0714i-riya_2@PT6374@2	HPSI0714i-riya_2	PT6374	2	riya	Female	10-14	Y
HPSI0714i-xebt_2@PT6375@7	HPSI0714i-xebt_2	PT6375	7	xebt	Male	0-4	Y
HPSI0714i-xiry_1@PT6391@6	HPSI0714i-xiry_1	PT6391	6	xiry	Male	35-39	Y
HPSI0714i-xiry_5@PT6391@1	HPSI0714i-xiry_5	PT6391	1	xiry	Male	35-39	Y
HPSI0714i-zaos_1@PT6374@9	HPSI0714i-zaos_1	PT6374	9	zaos	Male	0-4	Y
HPSI0715i-aowh_2@PT6386@6	HPSI0715i-aowh_2	PT6386	6	aowh	Female	65-69	Y
HPSI0715i-meue_4@PT6386@9	HPSI0715i-meue_4	PT6386	9	meue	Male	65-69	Y
HPSI0715i-zaie_1@PT6386@5	HPSI0715i-zaie_1	PT6386	5	zaie	Female	70-74	Y
HPSI0715i-zaie_5@PT6385@5	HPSI0715i-zaie_5	PT6385	5	zaie	Female	70-74	Y
HPSI0813i-aizi_3@PT6387@3	HPSI0813i-aizi_3	PT6387	3	aizi	female	50-54	N
HPSI0813i-vajx_2@PT6387@9	HPSI0813i-vajx_2	PT6387	9	vajx	male	50-54	N
HPSI0913i-eika_2@PT6387@1	HPSI0913i-eika_2	PT6387	1	eika	male	45-49	N
HPSI0913i-rufg_3@PT7431Strontium@1	HPSI0913i-rufg_3	PT7431Strontium	1	rufg	Male	45-49	Y
HPSI0913i-rufg_4@PT7431Strontium@2	HPSI0913i-rufg_4	PT7431Strontium	2	rufg	Male	45-49	Y
HPSI0914i-fuhz_1@PT6375@1	HPSI0914i-fuhz_1	PT6375	1	fuhz	Male	30-34	Y
HPSI0914i-gine_2@PT7422@3	HPSI0914i-gine_2	PT7422	3	gine	Female	65-69	Y
HPSI0914i-iezw_2@PT6385@6	HPSI0914i-iezw_2	PT6385	6	iezw	Female	55-59	Y
HPSI0914i-jejf_2@PT6380@7	HPSI0914i-jejf_2	PT6380	7	jejf	Female	50-54	Y
HPSI0914i-jejf_3@PT6380@6	HPSI0914i-jejf_3	PT6380	6	jejf	Female	50-54	Y
HPSI0914i-kajh_2@PT6381@9	HPSI0914i-kajh_2	PT6381	9	kajh	Female	60-64	Y
HPSI0914i-kajh_3@PT6381@1	HPSI0914i-kajh_3	PT6381	1	kajh	Female	60-64	Y
HPSI0914i-laey_4@PT6382@5	HPSI0914i-laey_4	PT6382	5	laey	Female	70-74	Y
HPSI0914i-laey_6@PT6382@4	HPSI0914i-laey_6	PT6382	4	laey	Female	70-74	Y
HPSI0914i-ouvb_2@PT7422@9	HPSI0914i-ouvb_2	PT7422	9	ouvb	Female	50-54	Y
HPSI0914i-qehq_7@PT7428@5	HPSI0914i-qehq_7	PT7428	5	qehq	Male	65-69	Y
HPSI0914i-suop_2@PT6389@1	HPSI0914i-suop_2	PT6389	1	suop	Male	50-54	Y
HPSI0914i-tifo_1@PT7430Strontium@7	HPSI0914i-tifo_1	PT7430Strontium	7	tifo	Male	30-34	Y
HPSI0914i-tifo_2@PT7430Strontium@8	HPSI0914i-tifo_2	PT7430Strontium	8	tifo	Male	30-34	Y
HPSI0914i-zerv_7@PT6384@1	HPSI0914i-zerv_7	PT6384	1	zerv	Female	40-44	Y
HPSI0914i-zerv_8@PT6384@9	HPSI0914i-zerv_8	PT6384	9	zerv	Female	40-44	Y
HPSI1013i-funy_1@PT6376@2	HPSI1013i-funy_1	PT6376	2	funy	Male	20-24	N
HPSI1013i-mijn_2@PT6376@4	HPSI1013i-mijn_2	PT6376	4	mijn	male	35-39	N
HPSI1013i-pamv_1@PT6984@6	HPSI1013i-pamv_1	PT6984	6	pamv	male	65-69	N
HPSI1013i-yemz_1@PT6379@6	HPSI1013i-yemz_1	PT6379	6	yemz	male	70-74	Y
HPSI1013i-yemz_3@PT6379@5	HPSI1013i-yemz_3	PT6379	5	yemz	male	70-74	Y
HPSI1013i-zagm_1@PT6389@7	HPSI1013i-zagm_1	PT6389	7	zagm	Male	60-64	Y
HPSI1014i-babz_3@PT6383@7	HPSI1014i-babz_3	PT6383	7	babz	Female	50-54	Y
HPSI1014i-nosn_6@PT7422@4	HPSI1014i-nosn_6	PT7422	4	nosn	Female	55-59	Y
HPSI1014i-qayj_3@PT6382@6	HPSI1014i-qayj_3	PT6382	6	qayj	Female	60-64	Y
HPSI1014i-qayj_4@PT6382@8	HPSI1014i-qayj_4	PT6382	8	qayj	Female	60-64	Y
HPSI1014i-quls_2@PT6381@8	HPSI1014i-quls_2	PT6381	8	quls	Male	55-59	Y
HPSI1014i-roug_3@PT6385@7	HPSI1014i-roug_3	PT6385	7	roug	Female	70-74	Y
HPSI1014i-sehl_6@PT6385@3	HPSI1014i-sehl_6	PT6385	3	sehl	Female	55-59	Y
HPSI1014i-tixi_4@PT6382@7	HPSI1014i-tixi_4	PT6382	7	tixi	Female	70-74	y
HPSI1014i-tuju_1@PT7428@1	HPSI1014i-tuju_1	PT7428	1	tuju	Female	50-54	Y
HPSI1014i-tuju_4@PT7428@6	HPSI1014i-tuju_4	PT7428	6	tuju	Female	50-54	Y
HPSI1113i-hayt_1@PT6379@4	HPSI1113i-hayt_1	PT6379	4	hayt	male	70-74	N
HPSI1113i-hayt_3@PT6379@3	HPSI1113i-hayt_3	PT6379	3	hayt	male	70-74	N
HPSI1113i-nibo_3@PT6380@5	HPSI1113i-nibo_3	PT6380	5	nibo	female	45-49	N
HPSI1113i-qorq_2@PT6984@4	HPSI1113i-qorq_2	PT6984	4	qorq	male	50-54	N
HPSI1113i-uofv_1@PT6387@7	HPSI1113i-uofv_1	PT6387	7	uofv	male	60-64	N
HPSI1113i-wahn_1@PT7422@5	HPSI1113i-wahn_1	PT7422	5	wahn	Female	65-69	Y
HPSI1113i-wahn_2@PT6389@9	HPSI1113i-wahn_2	PT6389	9	wahn	Female	65-69	Y
HPSI1113i-waus_1@PT6377@1	HPSI1113i-waus_1	PT6377	1	waus	female	40-44	N
HPSI1114i-ualf_2@PT6386@8	HPSI1114i-ualf_2	PT6386	8	ualf	Female	55-59	Y
HPSI1213i-tolg_4@PT6382@3	HPSI1213i-tolg_4	PT6382	3	tolg	Male	70-74	Y
HPSI1213i-tolg_6@PT6382@2	HPSI1213i-tolg_6	PT6382	2	tolg	Male	70-74	Y
