# Supplementary material for: Population-scale proteome variation in human induced pluripotent stem cells
Source: eLife. 2020 Aug 10;9:e57390. doi: 10.7554/eLife.57390 (PMC7447446; doi:10.7554/eLife.57390)
Supplement: Figure 1—source data 3. — Lines are indexed by protein Uniprot Id. First 229 columns contain intensity values after quality line filtering, batch correction and quantile normalisation. Line names are encoded as follows: [line public name]@[TMT batch]@[TMT channel]. Last columns include protein information: ‘gene_chromosome', 'gene_start', 'gene_end', 'ensembl_gene_id', 'gene_name', 'gene_strand', 'number_of_peptides', 'in_CORUM’. [file elife-57390-fig1-data3.xls]

	HPSI0314i-bubh_3@PT6374@0	HPSI0714i-lutt_6@PT6374@1	HPSI0714i-riya_2@PT6374@2	HPSI0714i-gibe_2@PT6374@3	HPSI0714i-oebj_1@PT6374@4	HPSI0714i-fasu_2@PT6374@5	HPSI0414i-eevy_7@PT6374@6	HPSI0414i-eevy_6@PT6374@7	HPSI0414i-walu_1@PT6374@8	HPSI0714i-zaos_1@PT6374@9	HPSI0314i-bubh_3@PT6375@0	HPSI0914i-fuhz_1@PT6375@1	HPSI0714i-pirs_1@PT6375@2	HPSI0514i-pulk_1@PT6375@3	HPSI0714i-oojs_1@PT6375@4	HPSI0514i-eoxi_6@PT6375@5	HPSI0614i-guyj_2@PT6375@6	HPSI0714i-xebt_2@PT6375@7	HPSI0614i-koqx_1@PT6375@8	HPSI0714i-mitg_4@PT6375@9	HPSI0314i-bubh_3@PT6376@0	HPSI0614i-dixh_2@PT6376@1	HPSI1013i-funy_1@PT6376@2	HPSI0414i-reng_4@PT6376@3	HPSI1013i-mijn_2@PT6376@4	HPSI0914i-hidy_3@PT6376@5	HPSI0914i-hidy_4@PT6376@6	HPSI0414i-fuai_1@PT6376@7	HPSI0414i-hutq_1@PT6376@8	HPSI0414i-kefk_2@PT6376@9	HPSI0314i-bubh_3@PT6377@0	HPSI1113i-waus_1@PT6377@1	HPSI0414i-lavd_2@PT6377@2	HPSI0214i-rayr_1@PT6377@3	HPSI0614i-eavo_1@PT6377@4	HPSI0614i-foyj_1@PT6377@5	HPSI0414i-jetz_1@PT6377@6	HPSI0414i-xugr_2@PT6377@7	HPSI0414i-wize_1@PT6377@8	HPSI0414i-eafb_1@PT6377@9	HPSI0314i-bubh_3@PT6379@0	HPSI0514i-kuco_1@PT6379@1	HPSI0514i-toco_5@PT6379@2	HPSI1113i-hayt_3@PT6379@3	HPSI1113i-hayt_1@PT6379@4	HPSI1013i-yemz_3@PT6379@5	HPSI1013i-yemz_1@PT6379@6	HPSI0613i-zisa_33@PT6379@7	HPSI0114i-iisa_1@PT6379@8
A0A024R216	19279549.78862872	14679855.904434895	16734497.005057072	15314782.97433895	15617410.16631073	16464065.104912754	17117804.828739893	17899812.647497144	15729088.920963213	15369083.134526033	17854371.284798574	16113843.179944655	16779581.019548334	15627935.636027975	16352548.80101946	17805416.403188318	14334474.838441275	15493208.56515016	19831177.49593671	14013395.548805742	16681408.177128613	16748329.576826235	15988496.07094461	16253382.545241715	15150475.977220215	17119737.33475802	14650754.978708334	17039026.383108333	16055898.301843548	18518440.954304166	15837975.337445712	16506730.121420976	15747449.833870932	17741588.054511767	18254846.228810485	17831923.66341318	13045492.78216233	16597065.730322387	16094929.95832084	16547964.393351952	16302085.943167599	17778032.957141593	18947628.11627572	15572217.52544127	14147997.582859285	15249021.261850234	17796686.78743081	17622273.4742266	16019004.741613535
A0A024R4M0	50259538.40041428	113955528.04551752	120562695.31425837	126365091.9047116	139225327.34374672	126517998.33358625	144214905.54912955	109722434.277725	129633181.93308684	129633181.93308684	74100731.00785919	119772101.85692452	112007557.7765066	117673821.66340832	133666119.35453176	121807887.32683922	121348647.51583669	130558396.25710776	123866583.74805611	135288033.23384428	63777230.74693648	113531254.0980451	126040312.82080153	126607558.016035	122173911.63296324	121961776.182273	132880205.61600332	137445396.08124286	124086738.87324728	121585494.12905017	119600040.81215644	123204876.80358772	114244189.42405672	128278596.12701432	119280812.37341364	109880890.6167818	84874174.95099914	127859390.464882	131941655.12707505	130925247.74785748	69100182.4985192	104874312.35838345	95880138.97494473	122836689.42348011	122737225.46565938	125251871.68910033	142772763.82392225	117854852.27831912	125459629.30334719
A0A024R571	21204986.484027933	18662955.84347466	22297996.597406194	18460330.854319494	15597283.832132265	17067682.495908275	22404247.80554737	21266966.355443627	17447304.289291956	17954978.464635413	26799857.294704303	15532943.31501065	19929900.34488277	21856069.780661047	17004135.578984894	17999696.980542094	18714398.431674823	25736635.520232014	11123648.82517114	17667449.405118827	23790448.26235013	20120568.891318224	23410570.39398649	15533390.179264585	19304206.57815613	19183354.947502565	22155602.59442701	14703387.727202548	15098384.325522898	19064822.14046199	25900033.45558756	21723846.277639955	17374231.325359967	18622061.14678321	17288856.475315526	22645903.64494625	13912505.826715855	18282269.243606333	18178552.281041816	18436474.19643924	18596953.82418422	12678581.688092673	16094493.54316112	20452625.54843018	22214767.51239065	18594634.712845627	24022514.80082457	15386376.08703487	21098115.402857706
A0A024R644	2319870.470736241	1612554.4627311926	1831249.4303935359	1319871.9766601382	1653282.607722739	2126616.006249133	1970670.3897671755	1724586.0363469073	1629009.100106001	2026604.4868859374	2042511.862036666	2477613.265933065	2221180.0917060315	1588799.1842163757	1509122.811525983	1968167.3678217672	1404296.0686681685	2195727.9170966004	1215064.6835284864	1591833.3248733734	1857994.5113064663	2032880.209380112	1719082.1372036657	1659975.1987408006	1810841.7851169896	1530471.232445759	1849692.9750055019	1923742.6788101029	1400494.6320173158	2429140.208812803	1902413.766426803	2036496.0441422774	1821858.4059020912	2236736.1782535957	1530966.9927266159	1586551.958053591	1993833.5012328085	1406450.664073451	1863990.979334424	1835019.3145843088	2015193.2892866896	2079032.3056625	2144872.687710226	1257448.9545488115	1149875.5496832682	1836366.7179425538	1855925.5188271976	2205027.3718263702	1719355.0545105832
A0A024RAC6	6372227.341287227	7737153.841933872	8045748.1933003515	10048151.899252357	8860663.306665959	9696043.745475952	9553047.85769776	9470017.987374945	11067574.19599364	9308571.017302793	8217409.504404523	7949257.39732232	6900161.9168085875	8492040.73488466	9891949.396799397	9484914.144622782	9319800.999965774	8279065.678675178	12243453.182287993	9381143.66826556	6932444.97546073	7320604.649625667	8253947.43096769	7768214.104046512	9645222.438361416	9327327.99382017	8476403.159612715	10268403.46954749	13094670.422191635	9071956.70017947	8790176.979024732	9921695.09468989	8521606.30126398	8539206.311370581	7926093.420802282	9340401.3161021	10298007.849278476	8970704.667380488	8359001.720428694	9492306.374735238	8332246.5475623775	7373962.133919886	8087251.117221829	9516391.127541697	8726961.407555485	10128079.064731823	10796612.346870247	8608466.885691427	10209744.208178673
A0A075B6E5																					31153.96226120667	46129.53821865602	45470.2572338596	47275.311533200416	35862.872501215665	39709.517025740286	38151.06401078897	39483.046458443816	35047.57845894834	50967.620560011885
A0A075B6F8	443344.33653945953	763541.771803453	389601.3613259213	1807699.0522887062	418705.09777214157	396157.2719553505	418472.71855541633	325302.7362375017	382791.94609642815	347836.47846540035	646108.5826277386	628725.3987501629	475573.8704041045	562709.5982287907	607440.6151192433	532211.1776216638	559705.5495924129	638415.2873394544	499496.3552767217	543055.0605041977	524942.3241338503	552560.7802909114	639625.9971880453	467326.21961667907	659075.8934479713	587640.6475514235	602246.2441312524	485698.8705180024	543189.4065577905	631146.8205310678	537261.0946176471	584849.4002097258	487772.21325308713	523756.4478787369	665180.4028599443	608606.5973657446	608068.1008968748	528624.0336071479	500041.4857398843	649289.4776511403	570031.9166847827	533265.7791718675	289621.5246086681	595431.1246894407	536127.1097032565	653520.0541075008	637606.3527959405	574539.4921794366	693108.3258431557
A0A075B6H3	122007.33219439516	149863.99328854732	206545.99507511413	169704.1184426667	260261.41559200204	268960.65696948674	261486.51037803988	369095.4175144375	210938.5296945884	386973.25421766477	101626.06500439717	297344.90495727264	313616.4531232457	224811.65136401207	213792.24090611975	437125.6786721219	145261.36261534973	322228.1671904401	135178.15410286374	214844.90816530868	90882.47749006325	391089.31023888616	356570.8795440417	311034.83810188214		242940.8792133588	180647.82049504988	251642.2294686803	154799.9932348368	185639.05438708945	264090.526348483	152980.71701250196	326065.3335577245	214288.25876076304	262124.11525513922	285999.07565067324	229458.4379153253	237177.48608893965	196428.79759679484	237177.48608893965	95409.8690501808	266983.7296599476	316429.2261498989	241904.2713958991	278819.1851645715	292136.3592099598	168981.76780450373	232245.66164869443	228001.72706280145
A0A075B746	3436313.212917855	1753688.0941090337	1777991.6526583016	1335462.1702617554	1593064.1434378482	1917041.602111887	1916647.915958281	2112808.603428288	2374058.7349611283	1389712.1222286408	3062712.9179656287	1985488.6415913375	1822399.9242580896	1507219.3288174937	2138698.8423318285	1711313.209365958	1685125.821039877	1444966.035572574	1767042.9539175476	2481837.5036009816	3136017.4172171038	2317695.9895631936	2071918.0403622987	1700768.9668720015	1962559.0380663737	1762236.0191693974	1797527.674746904	1745475.6418696863	1420872.741946561	1691733.9420042054	2661206.165110691	2190836.533345061	1620022.7333458213	1583782.5777659046	2196228.667220273	1950698.4782047838	1885867.473240019	1750437.1340486354	1716203.3538641466	2051518.8418250359	2791862.4387388905	1837131.22560782	1787149.553245563	2023140.2542567863	1916472.0510446536	1865474.4910327576	1907532.2397278275	1855417.2033013282	1907125.8846679716
A0A075B773	1242597.3907771502	642245.9733023371	845001.4029347845	633114.8686824925	806138.0744605697	1083121.1516891706	785181.4409068283	1127055.2370321923	971396.0990557871	853496.3240360331	1151995.1704693374	907638.4493623588	577973.9522444176	700281.9106346118	1159576.6439165708	969645.1823229736	685682.7143298115	839923.5796840787	680576.5595636407	1316066.0317376673	1547179.7333166832	1541841.85873016	606588.3506034691	788751.359836328	594465.5872352804	866118.385469913	867983.4259880958	582439.2914801015	843866.5227357314	750100.0028905388											775470.6815382037	1147809.1465419605	785992.2011475638	822663.3583208453	829504.2730851729	986729.6915700941	530141.9889617198	996326.242422587	1181647.5868973376
A0A075B7F8	7444442.383526622	8005363.519019601	8488941.719141414	7610811.030357523	7468991.001636783	7976230.520418989	8269630.871807882	8252328.532537469	9720069.705690064	7916042.041076611	8156266.150899444	8945003.976480927	6595350.5796242235	7313409.301354899	9544485.697316393	7731790.32998288	6595350.5796242235	6788352.33542939	9333397.602714237	10149451.023986852	9434933.427679507	7946171.561937342	8078110.366286568	7204108.720559341	7804154.098922552	8424973.294387216	8466535.32667393	6717098.771422228	7727960.748327582	9348806.708173763	8267014.764090805	8928987.353287295	7157496.831449719	7814894.5865843715	9148863.639375446	7039908.042697304	8562662.744933534	7991747.052222268	7518710.282873899	8722567.407950787	7971725.575620597	7108662.856039624	7436704.219011809	8503101.056316197	8048956.916529777	7947770.938350183	8098754.730938401	8616711.638889162	8403207.236993512
A0A075B7G6	758663.8023804886	1032995.920577475	779489.2852368498	1114701.6028713272	1037517.3890478936	957304.0140817164	725996.3782920789	907987.3403300663	939840.3061406352	908132.1164140943	777419.5886593376	774033.5558510162	956689.7096631004	926242.5026506751	873786.0823841619	741933.9648281303	1197423.0982035121	575205.7093463894	1306927.3992246226	1032956.7126377295	1212775.0658447545	1303269.6867492106	766423.2234844684	1035891.1897646795	1190320.6282024458	700398.9366554777	760787.542215134	635669.5322069086	844601.7472024154	712479.60068191	537523.1456557742	1326256.0219269486	724802.1109036645	816929.061502847	662294.9050888724	1104552.7984042454	1283468.3512799179	1265540.398162878	763893.3797575581	677363.6064906528	968503.9564598721	881494.7095932735	334306.54027646827	1038917.2715056031	1320451.1364955718	1228701.900468625	819379.3604579759	933103.2817484532	860690.097220711
A0A087WSV0	1257842.6121229995	1078841.602559034	901929.3196092264	975177.8145714628	750739.847976235	1002611.664950288	1077754.3202119383	871485.4138905468	1555757.975227221	1009255.5323449095	1513937.9720173737	1210675.101264316	674243.4813918717	812366.100524488	1325929.6160381571	964993.7882491808	869518.0815618256	1118361.810287647	827602.3635005382	1163787.2613920078	1405819.3670648038	882638.4157138237	1277146.0810185715	1104151.4768366623	971070.610485194	819213.6858573081	1191964.0383025215	855468.0798269034	959905.5197915584	1014035.7500654141	1419005.5139295068	1084520.737116374	1127083.287061547	1197451.3228263196	848514.5012591829	1027054.286586668	609865.2091406953	970121.7868168196	906181.183323836	1291620.2137117584	1402101.6792233288	1099252.1975391558	791641.6235344319	853935.9154932478	1017893.5317085512	923191.804626652	1463775.8289050981	992307.6616329809	1010751.8932277235
A0A087WSW2	5838707.9445213815	3489725.237309599	4842875.434596513	4146422.440384425	4028642.2758937324	4476805.659989788	4343263.664577453	4791525.550024419	5147906.667164711	4917801.052336928	4136122.2013179	3686371.0354040717	4245333.301208676	5116291.822837607	5440698.430922248	3930606.767887078	3182262.5265900623	5512182.059941666	5967517.884372638	4806281.223374928	6008008.52690091	7227019.192398612	6084699.981163112	6659118.973587006	3474659.7182575893	2212701.8383730543	2933984.965709065	5307048.634944384	3416911.0531981518	2699500.844302382	3720440.239763429	4150243.908054229	3995586.087567455	4114623.3882603743	5011962.569990885	4350107.406388478	7893507.1863183025	4053226.565052056	4276405.31270592	4457576.457543983	2772614.8532661246	3524259.9672096437	2340258.3048182707	5638542.9140538685	4619485.596111214	5382774.7850036435	6964762.898752293	3831543.089913157	5257099.079520567
A0A087WT20	19238933.36266266	22026905.359372944	21465810.438490376	23409481.51643194	21355094.997341808	20869860.65650548	20236362.62111229	21673379.337498523	25539728.61556832	23585806.107890774	20814660.212867066	22880594.96312205	19032699.58976012	19415007.79977172	26485871.66474585	23686566.838555153	18841545.48475432	18687151.784557328	23686566.838555153	25870695.480371654	16325346.329637164	16093476.651906153	20800136.47915391	19684837.71725457	23626014.270587657	27148375.6339344	22089819.197149128	22862406.34440937	23029831.40416674	27741116.46560723	16448188.4626482	17661925.53535135	17610220.721679468	20954522.64327704	29646604.907362986	23387951.079270504	28696577.89804677	21401877.507788334	21725056.60247384	21868437.10180584	23841586.94931877	19438055.21042017	18961593.54480337	19997215.38950629	20903891.12897739	23099298.34946491	22097978.470852308	24593246.18974788	23251905.92454758
A0A087WT42	672475.2479144455	604110.3086962913	316724.704808609	607466.2704936471	467491.9857767928	336553.69792151666	437613.69985795306	395334.15898711205	461635.32114428846	499090.08591311396																															365970.5943512636	413655.4004978773	467579.2414978558	460574.8428088413	560774.1648235822	419757.1976979532	505762.979339853	505150.68827133346	604479.0790248176
A0A087WT48											51749.26492351257	41519.65017876117	29739.2992552009	39000.64032308732	32284.529287811143	33618.012572004285	33548.716390101	33759.414240482634	23041.916917736427	26650.000551160727	43163.06147397255	29947.320481186387	21857.381118239875	15667.465744958314	19786.831438345424	40300.06888065866	23718.95323657857	50086.90604343794	47457.13240882028	52927.329060103795	61803.938895195635	28634.702770928925	40108.59200270938	21110.49405438076	40193.241755593066	32432.39850257457	47857.892107607375	30358.479556924118	13320.792931061002	29081.037831588397
A0A087WT67	1505813.4929521063	2260695.820998301	1860367.3343168618	2645085.1474372363	2023079.5951257504	2074823.018803286	2162000.809792083	2035563.5893030276	2300207.452401131	2207144.9503523377	1169828.6249815926	1492608.7605921347	1238409.9832825828	1366529.0042844322	2303615.463086195	1563894.3612049285	6163012.5604419075	1237301.687253155	2441975.139399957	2097605.397136162	1843843.7643437288	2513723.963671037	2482567.0589041617	2101235.6909042075	2167624.5914901868	2743197.4684200543	2177690.876009931	1707085.3278724074	1531802.437910645	1806007.4884813128	2655328.542138395	2041791.221419628	2362031.252430948	2085643.206793229	1714692.420725406	2282367.6611932064	1701959.556215069	2038107.1792879703	2174263.943785176	2018583.453705453	1542173.9030548476	1703840.3749013378	1812940.4479265762	2369037.614404026	2363138.9023217997	2674087.1606917004	2143842.535441882	1471232.755092503	1838832.1398981162
A0A087WT95	6933780.773251853	7206562.678797764	9882018.62933209	8460071.84933503	9500104.86587964	8569190.067464301	10033420.15698645	7942442.302084301	8931326.153880816	7531203.017509611	6498381.852465953	7763194.197445992	7308139.850345117	9394866.951856984	8325032.233944485	10191898.811261633	7837463.302279603	9062109.397019437	8482061.195341166	10126969.533330437	5893969.884538017	8376018.149318899	8047853.464592557	9340690.175561436	7774518.711586096	7741933.500106053	8192994.758038637	10382018.38872948	9216009.61984091	10024109.649860658	4562882.881561362	7675570.831881624	9742272.573693275	9819671.646545103	10379655.15943364	9607214.853983533	7469010.530201351	7363777.090456437	8579076.822842332	9790982.715756176	5100756.242590688	7522302.821057858	8018314.990947121	9042100.133066408	9269576.149831316	9241535.081098033	10612399.982130313	8639719.380744414	8547804.763303673
A0A087WTA8	4195216.61920592	1215224.3128256523	1918868.1639941682	1415329.804981845	1150245.4076236412	1088444.818436946	2844432.312696725	2338630.607431072	2186456.689122014	2899812.0614484386	3558823.530835341	1651461.7110886497	1699208.8332448932	1497707.5675238685	1566480.2438722127	1537885.4901709554	3065449.344647607	1463531.484891617	3242713.880627192	1969521.0035946115	3102829.2790953913	1488015.432047827	1891831.493890697	1797526.2451163658	2501819.3763880786	1751778.440787131	2476558.352506703	2101546.4637600183	2035938.149909512	2104956.637641101	2446185.8972912696	1702874.1195135568	1404287.3879136269	2056605.6594304116	2344827.9715567348	1823802.507901196	2960596.4226357127	2253864.948882494	2099892.3525260626	2159853.567539545	3745770.211393273	2217375.69803557	2565030.180013212	1398203.402448095	2046112.9762880618	1961808.0908839537	1822086.00808134	1922593.5457035576	2191152.6536048776
A0A087WTK0	2182860.6647078423	2057815.6849958715	2585993.0961566246	2414075.9102129964	2220610.0925454185	2327409.515469228	2557209.1574304732	2868012.77995985	2519302.44031024	2557051.868147816	2166956.0995911914	2394494.7579786233	2357881.189910436	2574960.536137855	2818696.080957349	2211372.5948364018	2134234.2170072854	2424372.298687084	2925065.558159598	2282318.173318675	2037553.6917438502	2752245.4536347114	2665646.320881476	2315694.4558439557	2832495.6753326077	2278367.193013525	2233551.074944388	2258240.8945595003	1961963.059178151	2954587.418396153	1902952.4552513016	1661660.5322813976	2291145.735863765	2435630.952755623	2957356.278856772	2330045.601950034	3629285.021626435	2512544.766652906	2127331.3929663063	2442396.146857584	2913128.938393044	2307574.799266788	2605643.368086202	2307370.0818431475	2429791.101179693	2491001.610847966	2281370.969040905	2427539.2095196564	2178398.104950132
A0A087WTM1	4874327.808196482	6334344.205001042	5493592.724539288	7662896.027998585	5705170.437393892	5381249.017507443	5384166.538629325	6543364.3009141525	4573539.803819762	5141575.8059751885	4406570.783992187	4183044.4317425787	6757759.5543530015	5264071.00900696	6800302.025289256	5343110.441851684	6496757.763363388	5428344.655552038	7102278.933022733	5311987.265745688	6207475.494421703	6067866.840698514	4881474.915341343	4755384.563534867	4328592.460164381	4275404.379408746	4202099.777943717	7023079.710063339	4428772.73329716	10924075.40602886	6448098.2082189685	4593757.509206306	4824727.266821385	6171858.378111334	6473966.821071858	6443478.813066666	6133979.337862461	4979938.943938718	4796895.411028769	6227522.0896965675	3699297.0563455564	5712172.959545985	4893913.227044993	6281510.799728617	6368959.82470268	5967458.674180361	5812073.26995842	6330670.8448725715	6498754.619620447
A0A087WTT7											1860934.506125016	45960.11604083545	120781.0692476106	48049.1755189632	57577.1278894423	37406.84275427603	17861.579666296042	47908.66668665001	147784.60575653685	34853.45811189491											1278967.502417314	108020.79182604938	419607.5165440293	137779.62707871868	60806.947483593096	89486.25026641887	29194.776574682997	148065.4029714105	85877.9337234181	61272.65139209863	605536.6500522378	161801.89179244006	958095.5273354151	53999.4112720128	218796.4113880716	45676.294398929276	74338.65998931641	197198.7887922512	64078.89679255807
A0A087WTU9	17271341.650028102	23168857.44996964	21036145.98380528	21807403.57091387	20638376.55393332	21203230.617585808	20587368.092921007	18405077.59702192	22504330.73158777	24159294.49964204	15725297.893249728	21574102.94237013	20138991.71960738	21353035.31873655	20668087.932605	19605336.78856562	26057358.817203026	19795663.266908333	25511156.014744785	20352396.70804853	18561777.953530256	19824008.29414502	21234050.83694062	22432494.99902092	23012703.89222868	22490761.2197976	22970997.54472537	20024566.75934474	21306423.61643165	18923641.85098541	18128004.46477821	18343130.494365726	21662655.278321054	22103625.360322505	18303313.03956556	20812869.18279744	25068720.44086917	19983753.55986763	25965941.44313031	20409412.180688474	15430780.344394347	20429520.26821332	17766543.423933044	20801780.892346	21561188.426904548	22060415.751767192	19041771.771898244	23718471.271129657	25491995.74272978
A0A087WU02	737365.5959976051	748119.3534466919	819566.6661955485	580621.43439122	629909.4893662008	645062.5112262776	686774.0552712199	772844.848793645	919242.5922482574	665673.8796703604	634871.6405803296	777377.3614303307	708605.3698298442	691123.8988105932	793820.3292207154	693950.9353780628	515980.32926227385	737625.7656142778	887773.1970846448	764049.9033265451	602513.1868928585	402004.0013882804	449554.007516309	489658.50848311424	633320.79590522	636504.1156432027	470132.3715128929	1278415.8790421418	428722.5762602203	1814225.864061284	709906.9144070433	826032.7578310521	681121.5272499106	716095.4061530838	683948.7569816043	805697.6462053149	912849.6530365036	468733.74707234773	744797.0235403883	655990.5963015227	777771.2997966388	608587.4484223786	425088.7373193583	892907.9074769261	477752.2661488709	719498.7839272609	958634.3635387827	922064.7564066219	791311.9381131416
A0A087WU53	7210130.36135312	5530037.892039831	5519460.4431115035	4883337.584305624	5679106.1257739235	4812247.288019893	4922941.5209907545	6068257.851462595	5521428.340586542	4791830.351716379	5749391.588531165	6916723.7666369425	5126683.678047483	4220860.234889398	6726694.750732829	5960595.266207449	4991059.470778309	4959952.330297306	6644256.507098626	3642573.684450007	5705966.507371366	6989461.541752713	6244929.84888849	5488564.90420643	3522043.5672233435	6177232.640814346	5694408.447456268	4718192.69167488	5151592.419300777	5246396.029794854	5694570.5286158025	7297518.992273955	4731138.244836917	6024348.750557382	7258256.434225515	6333405.066862282	3871451.8175679683	4512331.280712803	3810213.1332785273	5405554.476314793	5125080.754936433	6360404.677585998	5267681.491131603	5882975.353588163	5751185.503530532	4894860.360617012	5262533.450113727	6152835.66374523	5310616.153220691
A0A087WU70											1018611.6565046244	361204.62492096727	250851.66027201852	426782.08404878725	415899.1486790684	232894.8169119825	171794.90833627552	345377.7274832905	244990.42222289855	362634.9535695589
A0A087WUB9	24065738.39909637	29344420.96955277	27157265.995003786	29736832.015565205	30841416.825308487	31096716.259720664	28274509.22558618	24671812.58155053	27067996.60978188	27322375.832035664	22742209.20527469	27932823.821839876	25275244.452386864	25254941.49811612	31683243.54317293	28061853.9302672	27778308.67176603	24761869.75154085	33594196.271429434	32494394.90665656	23203711.99631077	29577915.285982203	26974499.90655475	29829122.033119936	30702300.565951634	32244135.03889725	29265075.567942437	30492100.96941885	20496858.54453249	26793362.37829779	20010257.557043005	22717062.216852665	23731956.95705044	27655580.21650613	36089054.05366641	28810198.83157965	37279796.89241331	28694641.509675946	27655881.67038936	26934653.25476861	27707530.134052657	27731810.137091115	28176457.92606873	27519899.66612769	26122585.491264485	28091963.51549489	28783943.602090925	30781648.29653287	28176457.92606873
A0A087WUC6	10429759.085034287	16595396.71732712	12460077.26383802	27309049.500510864	19618197.738227174	19531505.367315765	16800219.351898033	11879712.805113045	15702751.095964575	16886911.72280945	10224249.587574726	13304417.567673128	11980547.095536334	15258766.29297113	20010778.6044834	19054291.61937491	18821862.848184425	14925334.443200488	22477444.15004943	21155885.796578925	17463427.474867392	14736039.034736585	15967095.334392644	16649451.285552232	16519696.798195265	20182335.22955003	19105695.250534214	15439427.085807635	15753721.288516738	15396684.431148868	11166864.961390788	16355160.946328696	13414363.491870575	17576475.80080547	23581604.10159894	17292545.384692308	19134543.959226474	16558194.854717618	14908712.93274218	17225111.910865434	15068863.248279387	14763194.355252676	17383014.07391084	15234970.866760192	13938088.414223267	16668368.464170285	17840711.575376116	16737682.271110255	16518136.782013426
A0A087WUD1	7089378.910893268	9821587.917576432	9438895.542109758	11628410.010017062	12531236.87414882	12266423.946958706	10213202.346759232	9866729.26078302	11430850.249159995	11069719.503507294	7635883.399556298	10220956.38781486	9834157.230322452	9855108.340848647	11639995.93234354	11706892.460690342	11097631.716166273	9596098.70545462	13184497.097801024	10585211.66029662	7404562.638804484	11375012.768767267	9673462.09271532	9395649.668051692	10730804.513134599	9917482.97518317	9090069.568189712	12660974.50900692	9258230.428294016	15850186.976413583	7753503.259547894	7847202.4673584085	8001640.50888109	9142256.341403108	13261453.609519038	10325601.731068088	18309617.784242515	10283976.516356256	9837992.07301518	10593192.397072732	6594014.46323126	10048831.004623814	10470546.201434588	11847696.869347718	12359604.84127575	12186657.804342976	10823346.703048266	9601366.28604172	10331327.83268758
A0A087WUF6	3746978.226548047	7195090.609311389	10336667.962563047	14138027.687902402	7027747.427418252	6192054.076049504	9278165.39919493	5551405.9350180095	12812962.820629885	7039847.698231933	4580150.7738762535	10857900.2215362	6332666.928934667	12374410.758261532	9792386.160331542	10092256.951208323	6235145.302993903	8327099.10389833	7419819.627006315	7307111.552581509	6365286.59702293	8491350.339648914	12376542.389316944	6660234.83984523	8018638.225872565	8339385.406700217	10191468.350717137	6526491.24566382	8044746.875018437	8304800.996008768	4881679.938935306	4490347.760176157	4044087.5341312476	6837697.458824344	12090604.14193397	10895537.110211616	11565144.587972496	11722272.580339866	6323882.9725744035	10467693.462246412	3173262.48501532	5224022.51293843	4057686.272586693	8438781.882484	8802154.192824151	7289195.13214341	12776816.354052907	12378031.873471806	11816775.2266583
A0A087WUH1	365225.7747263426	258134.52890644476	375595.95466610475	274281.7827409663	304410.1953834273	268005.0301071203	329861.8119457677	328869.3465881337	331584.84208054893	358857.9476425153	348392.27725571697	310189.1826672887	317764.59549983346	236602.1977597589	211536.21150118677	354606.03360443725	339838.77314605884	406579.119113795	317975.55636352464	351326.5510870571											441392.95661423006	301488.38368530764	390910.136324856	306550.9552307038	226886.9009730077	362473.9985718847	156613.10038822395	338528.8517059583	334987.09298367513	334987.09298367513	395593.97951053415	338250.74155133736	345504.5839846393	317962.4317668993	246286.89197865446	351786.4536238077	233199.80971625148	288073.65450666466	372583.72498323227
A0A087WUK2	77074702.54704036	92017863.7263577	105047662.2323554	98129591.04036868	99867390.13905556	107362898.59152396	116795642.79613248	111360561.45082578	121084082.50740825	120111985.211002	50918104.60553808	101040522.26401566	80175077.97022113	89540896.78992791	125804399.46750368	121271799.22012816	107391902.86872028	97914336.27604496	138671954.2463522	136123386.5349364	53910801.38786122	72874755.95302421	110768456.17162329	101710425.0450856	125982686.40012412	122120927.87755646	112505780.18860964	113373220.4502554	91622461.32619944	143982865.96472478	63624591.10672817	114968857.78508732	101775710.17040518	98100985.5799682	131473027.0019098	99047428.37024155	145246876.86681348	92137784.73571964	93814995.4629823	108662125.71491824	74640286.66658734	89073252.41516127	89851745.83890006	114544347.92972158	106169874.98309463	114166438.50072218	117929798.15373048	113523992.4714232	132971211.68773288
A0A087WUL2																					2133519.429502407	1469670.9012329457	582909.6305853076	930699.5293904644	651123.8060464797	738942.7976631314	700596.053387185	482791.6081762808	572232.8292987555	494135.7095432424											910140.414097972	297934.6737262396	4926742.931821457	298180.07018640015	689914.619422544	294954.85956714826	470097.8188473836	290304.01236982155	263882.99349254556
A0A087WUL4	6800631.416187364	5024181.946664393	7483636.0310139535	5836857.26429786	5840864.224704842	6530343.723279987	9113102.907426244	8872138.879315423	4789501.561009977	5756909.297450357	7659222.463873763	6640778.755429065	7096988.959175328	6137447.084592949	5631511.332680812	5041872.974753804	8456195.27699614	5662140.286289219	8342607.740537434	5379399.083364009	9838266.56630672	7057883.308431952	6099940.108439169	6841071.976407402	5384226.490396403	4875540.716395768	5321089.648708738	7717200.318109037	6206923.505273382	6706017.269584827	7646853.993828722	8682773.957949964	4518669.8119515665	6717957.306757863	4513223.334747985	8725528.803998081	6666215.773323838	5997742.393742235	5765096.119991243	6814087.62940108	8325868.452314003	6564308.197832735	6696213.358072078	6029836.225996453	5182988.517002306	6954128.4758585	6633392.60438267	6568176.924599531	6591389.285200309
A0A087WUQ6	25412993.45659007	17163144.73135211	18898650.89339993	18450354.88784319	18007262.992030766	17456474.254351713	17319927.742782254	18364738.690858673	16077201.064453473	19658094.97460085	23394401.13785672	20658142.924438726	18267087.78268532	17036267.88499306	15812065.298578722	18516339.840820126	19438351.87887633	20123188.45187992	14355153.93222436	19207848.869362283	20906892.926854912	19334609.244498573	18444359.609970354	16814048.632959895	16183641.810522584	20088750.739360128	18617801.487006407	18194330.23741654	20683957.18084916	17540456.494347047	22766554.931662694	21193752.00458107	15348174.193054326	19604168.331092294	17984095.545568142	20355589.459306307	14078544.840127107	19478168.71518964	19604168.331092294	16395632.010905018	19140033.982598294	17544390.100345165	16539099.54431278	21131491.712543085	19262405.091769904	19871016.76828613	19432322.057294734	17200231.01017305	18744621.756825134
A0A087WUR6											1778237.0386983957	833968.6654951734	591678.1065042854	768409.9742881457	736431.3084810167	573250.339675367	486024.767917682	909729.9583500752	316559.67586161784	608977.6427110252
A0A087WUW5	1491121.650149732	1591726.6756962782	1539276.1270047072	1537031.9103736498	1723199.2979911396	1334026.4859757116	1325498.462777693	1189050.0916094014	1210017.486990995	1440338.233812661	2261129.2005900177	1052744.7405732102	1060539.1644558408	1081020.2569984992	1380525.1406587414	1310624.083924083	1856316.6751112519	1272315.3197349824	1795453.833304326	1310599.2081031813	1457814.8544723294	916834.3447951843	844931.8719899944	988581.1845423549	1065230.4656171515	2149759.43042877	1436104.0428785547	2230455.171012084	1553918.267799613	1737643.0927920954											1259569.8979045104	1750035.5369223852	5030857.5963573735	603269.0522811032	1562848.4505687943	842369.1753384415	900599.0940379406	1081960.4598468535	578867.878524296
A0A087WUW9	2532142.5225882046	1566284.73731411	2458439.1944172517	1933614.529083995	2297027.718873781	2289550.5696390457	2352334.8862291174	2383192.962435957	2255250.631086059	2051706.013029402	1821825.0463392409	1947145.335379433	2666233.2443433614	1854884.999889721	2751890.634253907	1838241.9589778518	2416225.825428104	1893507.7089623746	2511878.085016702	2417718.2720316136	2597704.4235375817	2729054.438070244	2385068.6932051256	2096717.588003318	1613473.319877131	2145406.4939138545	1917778.9818179845	2217752.1563684936	1640224.7102714798	2776367.951158449	2356267.812397081	2071023.6553380503	2013111.5377005925	1892107.5850717681	2865246.9829374687	2346711.2338791173	2043830.1392300262	2147928.069939841	2168488.670214109	2214832.752427836	2338929.2903393595	2187799.9713191995	2373902.5701512345	2189932.4171981327	2142592.507818287	2343355.6720679835	2115265.6808387158	2141395.9255048344	2149645.5336496104
A0A087WV05	29068405.80547411	9797084.950970726	14070683.913200967	9016989.409775363	11604117.190774102	14176689.091862632	12696693.712855525	12849392.088035233	12577276.46233743	12910272.194123555	29573352.157896884	12610593.537591245	12995329.862535015	13480467.635860987	12489357.58863933	10906468.16157769	11613992.94027468	12014277.05647523	10263989.96273261	12819776.9206981	36798864.2659682	18260892.41398344	7838154.096152118	10453875.01986424	8539476.489225784	11765894.867289605	14354631.288039714	9922158.77983988	11262041.480030715	9571617.358276246	47572767.5330893	8880602.3021338	12660862.043031722	9356114.480524467	10601917.367885916	10964271.482191078	6630175.736726687	10769171.371698823	11609875.484183628	9721838.505829038	24751856.207576897	13487944.50547532	14034859.366179185	12271644.79592019	11892712.835276294	12625211.934266245	13366337.126669222	11519962.908245075	12126786.501160385
A0A087WVA1	3413671.465478682	2557523.7018974707	3096388.078774848	2470253.6545317173	2757369.51046294	3602641.01689976	3693420.932108922	3224051.9385310467	3602771.012005072	3147224.8312919787	3536102.758523565	3198650.0838555056	2344879.875966674	3130030.4378219605	4005526.9630760425	2999508.1828654357	2154916.0047114096	2917119.357804164	3627883.055871615	3650721.408932641	3326217.0857841563	5101949.929669756	4538060.706222299	3768653.245719856	3051220.32630304	3104192.9014124675	3164151.7146885013	2121513.24720859	1851046.02675857	1538277.5180689918	3117611.2828999967	3673326.747755278	3071528.3608365036	3175624.634288605	3290700.83582838	2948684.2698735083	3165038.0170578025	3163923.636296665	3165201.896581499	2793687.0163612333	4219132.568886917	3670763.067282276	2724955.475102728	3066671.794745145	2070919.3606405447	2221704.5203030026	3430983.95063184	2840274.678200544	3330216.7585780737
A0A087WVA8	1412475.460642264	779873.1930779745	1130518.5881227371	1017071.2549021656	769022.2177449755	911978.026046228	828109.3704640231	963015.2854839478	1024723.3336899396	803749.082946982	808593.3562429242	846895.3661592817	869103.0298848874	846103.4856495855	887239.5942322237	843769.5220420598	1970615.4873397225	868859.6308229598	864566.8049019752	834808.768906024	1037344.8361193484	1100955.1953631379	1015910.1567231312	1058085.8365707041	1009562.9943776495	794019.6042355931	942935.1317237128	968566.5687363412	927032.5419127651	786129.0062377949	1338797.283685493	958664.014844625	806857.547093239	960746.7255302385	1021531.0225770331	1010963.1942833643	703254.2610988865	1001166.7403177009	1002169.5269441074	836401.1838558309	1402901.6576529453	889090.0630632233	857426.0152040838	869909.6302406641	852000.8927816445	889790.0788596671	921034.1172409405	1033293.3171306384	1053663.776807152
A0A087WVD9
A0A087WVM4	58328722.27376313	60908683.09507692	77973797.21454652	67685181.39477678	57390947.569868505	56273483.13238889	70278651.35767755	55634672.73271284	74282992.55873176	56574176.05357317	57973971.00444541	60847301.00536011	49452037.28061173	58368170.91733854	87430350.62259866	63279560.04015502	56189058.10406224	68271019.59614526	61532403.74414548	71987436.11596435	49447098.42970394	58941185.250462204	64237318.42351519	60984897.85793713	63512907.21816086	72057244.51208384	66494076.032400705	61664667.9967051	65179300.65242641	72812613.46125674	55808326.66054929	77014937.4381456	62347119.48418314	59822411.60223495	77014937.4381456	65189511.51273597	59636500.00699945	55014528.01532677	58402747.19115366	65080290.08918586	53109920.04657841	54356632.90500445	54037063.45545711	64609273.0316817	67023513.69986196	60267304.22531205	71153140.96369278	70590760.94200899	75458442.79751398
A0A087WVP1	5493380.120308626	4711885.596992605	4811918.007529538	5770324.883774097	5443462.638451393	6153905.557061161	5990829.107395718	5527926.001394706	7355983.75076322	6360054.665405055	5472195.366461588	6011940.787427489	5389822.6828060765	4646777.817311099	5997948.683189877	4841093.164910942	5886594.853632212	4991747.317246003	7873473.65537318	6508077.483519497	6000029.446369376	4946708.891017783	6023907.365392792	5661524.8296256475	5911540.687635537	5185768.9979463415	5932351.932745162	6083602.1629513325	4588891.251534526	7285340.3718406325	6428891.611448476	7056062.4542112015	5307026.8098482285	5404574.097368716	4641660.595407176	5357575.331474566	6559806.6028515175	5688156.983301638	4404820.892955687	6771088.064031263	5421946.718448359	6041556.887117702	5021070.591506562	5999854.322152821	5273739.073352588	5666438.2267718585	6073651.508193611	6199372.476102436	6098795.701775378
A0A087WVV1	403976.1585912117	198470.67507651573	221219.60106491667	256861.86914212516	251528.66209564763	310068.3180276471	249975.52257033513	253858.37138361638	212665.91353212934	268202.0717056201											396209.0699513229	238130.87863484985	194272.73742367726	189364.18671344308	140928.3407345154	343772.9957587853	365235.87435451476	193093.72279229746	368033.0264136556	197791.7351754995											366425.5018847948	226593.10003203305	620785.1019546974	130290.2633632933	147133.22230593234	193873.24098463767	205533.63269029147	341950.98578493303	210348.5437771908
A0A087WW06	1960590.023245939	3345150.930977518	2915162.040658385	3766012.307221948	3198612.841378215	3160111.3274631095	2714356.731014947	2158408.1464649304	2657683.1663511167	2814012.589230554	2099552.491699289	2585542.2267403873	2751807.489628844	3598501.068420252	2567613.751666407	3456780.7416449827	3129908.3572277264	3764424.836545394	2096628.442788414	2639327.651962327	1680676.7644769682	2141142.478734604	3014179.930751865	2953042.369142181	4292792.073817615	3228455.8265691465	3613755.246949722	3090731.778433112	2588907.2831205395	2086413.1034692782	1105637.6331740736	2912415.1376360687	2449560.171602845	4369037.397194182	3355749.5888320436	2905479.5852585486	3204417.518757557	2378401.644609916	2448346.1494362424	3561051.555223803	1620335.8867103618	2318201.57203661	3275806.7580848937	3077871.8176345294	2972914.8936478044	2807969.1099391673	3538493.82463446	3134559.403629606	3087280.4477560082
A0A087WW58	190607.6728239291	209545.39129029665	300424.52712600713	193903.0212531012	187860.14446610282	298561.93888343155	326306.91849681915	235503.63467098735	381493.46968407993	223283.03307942842	255501.00736389766	309557.658383032	181320.04904325513	291562.92870954896	369544.11629456904	208960.27587505255	317021.2442476041	227727.9335345107	193376.92049114808	192922.02016606898	547708.5744998786	716651.2255391927	253915.214435433	262325.8160913176	95909.74377166011	233797.7349191353	218046.97181811507	56323.84531129662	125547.34471784091	37254.71755695466	644313.647739015	519286.47878799296	163104.875621647	241296.3828234548	137769.2644486494	387765.8213087048	20097.62214280261	181875.45983344	136632.9039562028	115328.20833147207	171880.06000469133	188018.35198792946	168389.26574927688	289484.8123664345	271871.686336076	299798.0403793914	364924.1654241749	181379.83038974012	269077.63622282643
A0A087WW66	110832009.49809694	114724446.06087668	104238465.84775072	105525028.31977066	112741059.40027831	117492996.6846164	99310787.49147318	115612194.75063343	95989046.51496564	110505981.35291372	120230187.368615	121011364.01424688	107954554.36582838	108953750.31165025	89834299.73254146	121376589.45895788	127819267.75517245	110764761.25985476	79351952.06970938	99675289.19512829	117649299.14517936	109885544.21122226	129443037.06550664	110606107.52681	120900042.24164444	99643769.18047506	98994624.10438076	102556149.79214138	102082449.33120771	95210994.30605756	109648776.83244608	104767637.73474364	99024783.04814428	110767568.39994828	100461270.45108224	113336159.08560172	102767493.72038384	117598313.15279841	116979328.12229268	111620686.28677152	137768168.3084292	99901878.32500784	109156236.1453446	104336611.96870784	102328311.1614894	96436450.74914509	109433147.24939096	109537920.99939027	109156236.1453446
A0A087WW76	142557.6221618865	131811.16515107662	142735.5256939142	140552.82093802112	148915.19000693707	136398.72831199382	131802.1345149331	148409.47438289894	151407.64558255346	101395.98261964157	168124.92522595372	109176.2451939759	152088.99389854135	152490.46571289	158179.89485337393	112342.1372156968	152088.99389854135	103068.13830424266	116415.35553784568	152008.69953567162
A0A087WW97	409705.22237583884	771681.6599066764	375528.4448339778	803461.7836657143	1225045.979120345	1500032.1634886502	1374232.0322233846	919577.4552531488	504039.19260283094	715770.490455447	1139886.9028618566	806518.0323025291	686927.2171387073	1454794.2255289748	852520.3293902603	858355.8761377976	875256.2258092377	737120.49779967	720985.5899743356	466707.3244244911	491579.8781047845	754145.0567485916	237932.4458758075	279200.0194045867	389524.45224994345	715908.1614259381	976207.5934236322	2444876.18864776	1625702.2666201247	683994.0548208569
A0A087WWB9	513296.70130652544	674791.0504323293	1825673.0526670057	711854.1580853731	817076.2969387233	1095180.35936676	1367626.2950331385	1105284.1571554344	2051142.2720265116	1827479.849448039											339073.67090461607	773218.0048129061	813047.1165214563	642411.0630713197	993389.0310162484	2076563.123599804	2052450.4904985032	1145034.3394826252	1770021.6279075153	1384196.110669727
A0A087WWF1	652275.4858900589	640211.0640606494	881317.3961683969	514035.4221730696	602356.09518837	740186.4238243605	563454.0255535379	756735.1684847014	879154.9054631252	604245.4291729756	306930.6013989509	650531.5255456857	452088.6635990246	997855.8978483492	656144.9057201539	669205.1822064802	439113.01093442406	712786.4503951925	1190205.8446307632	759103.8888197013	566521.740023817	812900.5097040655	666640.0013292809	852523.5229062906	751996.3661238533	712601.1208340506	773188.2911762989	657583.62310174	562401.0879302861	477633.38772050367	573616.6282942491	664649.0244553529	630798.1436799578	651586.0563612581	871443.1871409394	620078.6981010827	611398.9850817507	815893.0238172141	777224.9023160897	617301.1899348964	534032.3831917418	885012.9583395886	756962.2099046535	659292.5705008539	677566.2449699519	625940.8641422294	550640.7227954293	866874.3110217402	717309.2364877192
A0A087WWK3	496161.8174995384	984296.2941960484	504459.7428240171	836827.7300055841	720837.1651438484	533998.5530823517	500491.1698427447	532194.6562726825	358524.4909217715	565160.8704693888	908668.9428326295	614315.2349235737	617039.4709986227	669169.6741775981	463703.89763157297	624628.4143505453	665706.0025964642	783062.2009437581	215740.03831478176	470903.66440134565	735343.4107652829	562824.3541003094	550230.4274879168	595298.9468354763	607247.2129849239	550072.2051986456	559823.0972231027	589920.8080342405	718598.8097482426	563590.6324519367											470566.5387753912	583804.5365872465	428580.9457787707	539708.6016645697	548620.8252286408	564975.9751555773	562581.9851211801	1031231.0626841869	786329.2859426512
A0A087WWK8	4529522.349984611	4570919.9631544165	4280502.068379303	4461608.739853955	4568303.619157582	4437671.975627577	3832572.8427421465	4088621.997439664	4052364.294107615	4437300.863003911	3179889.4800545857	3601680.0805520336	4162802.1563087283	5849490.036458554	4418272.851899011	3808215.711396094	4917885.034150451	5271107.228773192	4230563.8750554975	3819485.6050952235	3887828.781204212	4115845.775131005	5100072.787330862	5014705.449360709	3993467.3860734655	3839166.6178661766	4613590.1887029065	4723149.573589682	4358322.383306813	3613235.1452253	5921728.931178561	2836038.5679599014	4489799.643437109	3798523.435561926	4241313.084095545	4061866.752847711	5718686.572607553	3745650.855819261	4392648.098841082	4053127.4834687575	3371857.468957953	4516465.446906359	4694673.530378759	4017021.6369229383	4210186.447757406	4235843.472403274	4947186.433778808	4270542.575865502	4320717.544994194
A0A087WWL5	3793883.0879215007	1602182.0255795522	2288669.527129698	1563365.4908273416	2130618.05479696	3397135.0272501814	1950381.078663418	2686875.0296565453	2455627.5885795467	2727683.40161131	3365743.9607785176	2391371.1050355923	2515886.1483077733	2567909.556798205	2297771.6118909214	3109251.500065445	1736856.9272326091	2131445.952204913	2463223.1077457382	2016909.169249749	1333925.482045818	2490395.965779131	2988423.2107504387	2326863.080917372	2518707.726341284	2476941.385989043	2322135.79612626	3088839.0514231767	2210343.303044143	2839955.2993988167	1365263.9082679376	1780224.0475728398	1082373.2946024355	1568412.2514963555	3815192.1131136883	1821192.5534854697	7072265.341637551	1611652.507266923	1347109.1615218802	3132704.5498605208	3029510.761744409	2634573.991750734	2422699.94454874	2232656.016226868	2398714.516977154	2171930.609392824	2454281.588613891	2393445.368993653	2544039.9454306355
A0A087WWM6	10833320.767099358	9238049.660213156	7107999.708718463	5384845.5252982285	7066242.707263432	6425697.535592874	5904909.9979654215	8224421.045672309	3977670.729511728	5971431.974309363	10156772.520348135	10466594.596860038	9149363.562452324	5152205.590247065	4306127.587591426	4874490.126706318	6731606.86838479	4311171.2470162185	10911667.775238877	4074590.5468169996	14962724.919094773	7183929.422836195	5069202.523899462	6079375.807183246	3390807.48812544	5530305.005879443	5484970.948734303	5460785.285493098	8332354.70669412	8640131.332870558	11417209.73151413	13694278.960460147	6633355.218161799	5245405.631275801	4133711.772172597	4232991.174344539	8583547.99647846	6192735.180522327	5236885.653489409	4764469.523363028	15652929.167424848	10950891.7041207	5804447.10403238	4285344.535365101	3542939.6681199837	4484802.856598942	3544759.287892644	10814700.162674716	4283524.91559244
A0A087WWP4	16402601.3855169	19623840.90390164	21568469.781292576	19152894.705446534	17203556.366071045	22014298.84916341	21099472.32572763	20053646.974675607	24169825.01266711	22210255.77311829	13453490.040621862	21724021.999605805	17668062.09589967	17746780.818962384	25272893.66949901	21132393.425559547	19448969.38507227	17358560.47170313	27674599.1416058	22019094.16502132	15351209.546417827	21157763.347833924	20167848.72692706	19050317.538956106	22026264.98479787	20086315.920191668	17001165.028215606	22653713.106196314	19434319.33415659	26569946.50797557	13831439.229087992	37260516.39769768	16508518.002201073	17800678.350054987	23245980.78973151	17421580.120659642	24755678.99390016	18043462.535263494	16918266.726739015	17712743.692674816	18998409.584155515	19486547.93480651	19739957.527823333	20521303.77295854	19972980.64396605	20076131.34368764	19519601.642490525	22704524.88202656	22413753.61824444
A0A087WWS1	18989584.162568614	24297198.557518546	25845656.99558729	27139366.282486226	28833301.54087901	28094173.21678469	26367673.68373377	22121305.445561253	31246549.836358674	28964415.160645705	19590589.166136924	26064377.82442857	24080673.29957835	21058501.10997504	33583672.86187961	27316827.920486957	24881763.537101246	22808742.68845288	32513163.42541005	30000912.09553211	21259966.332513466	20220605.208443005	27779779.38759876	28194375.74501712	29222998.83018394	29029849.19958994	25727395.72544792	27788558.916262124	24120741.980052445	28554955.039311603	18314094.01717811	26960519.0467136	26100254.39412903	25103368.93590337	32150428.36486341	26637257.982991073	35061755.47313114	22481372.8953384	22251360.749465916	26838814.137070786	17537409.001304816	23458362.70745103	26647943.03861773	27100090.2893823	27721598.53785593	28012930.52932795	28589379.429787245	27488532.94467832	28531889.916803434
A0A087WWT0	462701.1609239165	1437840.8112981657	2793893.810654229	2749953.6317778854	3350346.328021033	7456537.581755303	8219028.921080087	5498245.660152884	3980094.0177151836	3528691.759930898											1645556.9611629066	8464218.126753286	4190697.69614208	10787803.308884842	1556385.1154701745	2311171.2482465957	5296959.254714828	2484397.7455115416	2546372.652082261	193695.2737470188	1629697.8599542137	2394879.394412354	11344264.483934678	4206763.333999458	2693462.1360329245	2904855.8252577544	1365990.7392919392	2903409.903990827	7320554.782328267	2713459.227154535
A0A087WWT1
A0A087WX02	4391870.563280524	877975.1237337079	2474595.794857417	685728.9612922819	1654141.5741025512	1662413.9444269075	1994346.1285993818	3642901.857788381	1611230.3154987975	2280234.991127289	5251871.454284123	1883178.986319323	1750101.9473536662	3110697.754896975	1480261.1051549925	1541016.9601362776	1232288.330459973	2393927.1467609117	777604.2386923034	1854492.9301020585	3303215.0654152567	1888394.223722277	2351260.2891956577	2991801.3830134636	1972550.252369303	2094411.218489456	2410016.095702649	1904858.5022078163	1452367.620871337	906563.345620658	3557976.3105653017	2393031.672015106	3253981.4814398317	1904582.9354356881	867303.1060676912	1649904.2695961827	805059.0256373327	2311662.606403364	3051144.67468288	1480786.8036287369	3673833.766155016	3218801.9297159067	2402890.281361029	1448036.3679147698	1463982.3466346192	1026692.452388925	2172484.4946430987	2471572.2784410617	2227266.8229004373
A0A087WX34	877840.5242982641	1415314.9382538013	1036588.6921047566	1617410.4866944382	1325838.2127935458	1470436.2748251578	1304052.3895627859	805808.4764102859	1034346.0338310018	1208846.206179343	1228094.876786644	1172458.3712626214	1015664.5829676492	1218547.4478509584	1228094.876786644	1054877.2375249274	1473031.8929342802	1501560.519873054	1174788.3985624015	1029360.5970956259	1632996.98374083	837808.3617908291	1074534.0468960362	1032294.162134003	1007249.0506054356	1139691.8547453834	1256155.4219040107	1021936.7803188522	1876382.7945609142	1217460.8512107332	2605379.012644062	1171401.3740284506	1117045.0187549812	1391073.3783543957	1008003.5399301792	764112.2724682732	1017647.4094141818	858797.5364930256	1008003.5399301792	1154524.6024314458
A0A087WX59
A0A087WXB8											1234497.3677442623	231991.7306239745	227002.445693471	176037.60143348837	276795.1085541185	172378.79248445245	120061.43122523693	175037.7407184999	130933.66417018152	201595.1633967704																					207963.32980200613	150330.23277088322	279471.06130358466	333329.63300972444	341546.8180275616	389921.4816753349	263626.73200836784	305077.0940254823	428786.07691809314
A0A087WXD1	467094.5787475209	581018.2196574403	485525.0282283586	429230.5464653941	469534.403009975	431347.32779414335	323178.9517820685	445671.7315649974	410749.09020555037	328687.6839147174	409133.77941043524	322574.1366145613	424674.4102598874	435240.4967431379	553421.2742699073	426216.9046370043	445420.9596321092	425265.6997711156	521735.8689399653	408349.6781020675	405103.23299702955	406509.2684323204	492105.8012464853	375266.23690541036	301102.8185228129	515731.1572225704	378962.8558902128	508722.7636937049	406674.29606557055	581861.0304185527	296012.6870995	449145.4298192611	286631.6368416875	325960.05280925275	630390.9639265123	406156.53931744077	504906.94769475603	612383.0772989289	478160.32867490867	382294.0619626168	419633.0797243729	382477.2989118695	480251.0096599424	313374.6295135561	435864.75521831797	412845.2881541777	587143.9708218862	365522.5760550124	486728.9237888896
A0A087WXI5	25436800.39286059	16916570.562034246	12155171.498678645	27234773.736171193	21881160.091389205	16363235.249728465	11662237.90804238	10334634.293824827	15483051.796025833	14798635.490728367	27201746.20721966	16673585.469740946	14793442.436531466	14885997.86366305	16604149.800653322	15729998.31603897	12956533.071728788	12110804.18347953	20734208.020666827	20575806.01823306	18913621.191470493	15473675.347822227	12565110.858319247	20040211.407275	21190702.55764941	17258936.140353642	14978779.685246775	17947218.13014641	13674650.094263453	20223363.965772253	26227176.36285794	17114653.785799745	17706016.617279522	13126076.837272014	16940392.07762826	13947330.84551053	19804440.499425016	16860684.48057562	12476205.152713815	18063292.083637293	28567536.11503222	15562766.637618292	16028390.474480685	14473162.397011578	15038960.09636077	18955348.798830643	11083146.839190882	18233379.48492922	18145599.740679428
A0A087WXL3	1585887.5661156953	2372475.191654497	2417125.884970109	3277465.949820816	1881632.74654734	1629172.4735181243	1902960.0188839743	1683908.9705003225	4906008.06060978	1412642.8760511188	1455154.1239860482	2296962.7018372305	2156866.8119399343	2032152.7691088263	2890486.742423246	1972934.90015576	2264001.600981113	2455938.35154463	3737609.4569430687	1807254.9176891919	3021875.7215341018	1990156.437340597	2391588.663487113	2344825.756659153	2563457.528841825	1628806.7027609039	2258587.668742655	2380735.924021744	2773688.1727415514	1715652.1011556871	3051778.7636200213	1874576.102504015	2839228.8611869495	1475821.3315599647	2487212.594341654	2402350.7868106114	1791878.4999713118	2789618.6235327055	2002513.9133673918	2354363.7029051227	1415231.0929688546	2159671.9453514074	1710847.7619765245	2426095.9126088424	2696894.156533733	3050386.5749464333	1683384.4254203998	3123998.5303442283	2977977.0369953667
A0A087WXL4																																									779712.9371090481	2081679.763780925	796457.6853566786	400689.29548207275	1607609.7416245427	294548.0953654604	205081.0193882232	1089570.5165866276
A0A087WXL6	1464922.402780142	805106.2353422772	1052121.4089884683	870527.2059485278	920286.84838492	1251178.3605746124	1050191.3157280984	1257078.9313991715	1245700.572083277	1228237.823537073	1730754.5689225197	1137991.576150665	1046242.8779525079	1097348.441441349	973904.7384111013	1113940.9465259055	965426.2841292416	1228987.1738252188	926151.6869305598	924613.0944629826	1014913.8889146872	968398.4856112195	1207264.5745139748	1023457.5344194056	1209103.8315323517	988986.2980427288	1048791.8165757586	1494781.9780963769	797644.2372599705	1392020.908553513	1395158.0995162076	1053828.9105870307	1178709.3084309304	756081.0787734281	1084874.6846195434	1053828.9105870307	1362004.572575923	998377.5765697964	1161070.744623791	1101419.7525572376	1124401.969178455	1177822.6579026815	928526.1105229564	1016566.7184514108	987413.1022794298	1220310.7405624154	1191488.415483298	1104027.5669673544	1221950.6314720896
A0A087WXN9	627226.0114598158	532898.1643611565	421815.03064639226	463620.4368738907	334588.16786732647	310952.7244323343	460011.28740921896	493832.3993142982	256014.98277219644	209392.77668553754	626620.8762947085	391789.53539509466	471146.7535860289	385594.61894927814	290206.4464846778	330036.7125510589	503027.21540030313	382615.6427348964	327125.4403415495	402188.8705434817	656226.9392266935	589394.103421125	474862.8180753093	400309.4342181275	291082.3421902142	325382.79231264885	361313.7907513275	276682.4395901314	377108.4997424143	357993.75863752945	666008.2455228093	208003.25747304485	444291.2884010297	360247.1866150187	304680.76746937854	409396.1601919947	331169.34206441866	519311.5271796675	492861.5344217135	374385.28647170134	611785.3693813165	382180.0585467959	296090.6208565889	482611.04045324354	372839.9772294962	425204.6911955181	414739.7828808663	318808.10896382737	355103.86582481756
A0A087WXT8
A0A087WXV6	592028.0431084521	407829.4586679713	523314.84582902	394587.5921230231	379421.32682032685	640874.8636210979	419597.62207501614	502725.9252907374	334909.76893665944	479311.2147550183
A0A087WY55	22455068.763780147	19771029.11960898	21505161.464021094	18718464.553267345	21307931.27115272	21493798.06288651	21408948.470293663	23377673.827542864	18446763.26923934	21557166.74596218	23136608.41974556	22468590.325622387	24982046.53364748	23814265.49641408	17383722.00186288	22187351.6576856	17377621.37999874	23266246.634358507	14184708.411855213	21240840.175464496	23026851.132018454	29363390.81616221	24900900.529957093	23806823.25661303	20649822.55229583	18157064.64896501	19745212.53253472	18299930.22049978	17273597.09165804	14818402.980842825	21223836.503250472	20980334.90916236	19719174.823684067	22001853.791678336	17677027.918142688	22386705.091602955	19486066.590319227	23487771.78756323	21830808.769489616	21248424.2251901	15331300.337862635	17901794.236327305	22295728.15191477	20632698.4774114	23042565.97034618	21828901.318087645	20344883.03858662	24009172.50552712	22975344.21574726
A0A087WY71	35660555.40250597	29320419.45494621	30119264.97012116	30119264.97012116	29432226.746770125	31658557.75148621	32337416.948368777	30963340.501666714	31899000.68209289	29307087.64180261	34492699.264239565	30036041.840961967	25289022.39787728	27552667.83310564	34232527.79083444	29917055.56984836	29018391.33424615	29917055.56984836	37044628.89931676	33317043.869057346	37089552.94746926	25207399.10266656	35593853.91041709	33272950.60638244	31998763.99760336	26738843.05122125	28471394.199613634	32098753.82420048	29428125.94110083	30917497.25370622	36019989.12440845	44253189.24722001	28850437.92580591	32767509.44495313	32386562.524947453	29786751.65402032	22384753.413363285	28105031.53791325	26407604.954261526	29855304.744408585	35857184.02227403	30217255.15042001	31080753.38507867	31815400.68268082	32062705.333152026	30031245.398646723	27727311.86152434	29522724.757597324	34159492.58908372
A0A087WYF7	2142117.0967842904	1250038.5785615023	1852484.8068502608	1575798.8313086978	1817076.0837255656	1791847.3684992206	1456847.652061675	1690323.9201651334	1685510.54686537	1496239.8565378985	1944552.140380242	1424753.5127565002	1867429.323742657	1526723.777603819	2050476.354272661	1553732.9954283168	1305131.9869615287	1547325.9331546042	1871841.098466664	1666318.9891539856	1928806.8449065315	1907234.017968075	1581120.1146386825	1488244.8921698737	1198104.3781768165	1814498.8787910743	1607035.523623192	1735772.0687948894	1267697.7575471092	2229761.7890271787	1014440.9674658524	1484052.227133579	1892248.011626795	1755303.9091543371	1765229.642515874	1749953.318514133	1706605.7798492953	1830134.6333253009	1853398.070891404	1706915.9590168437	2006005.9682257585	1803695.507443247	2017277.8093717496	1331081.8756499968	1437832.8417973288	1232287.5032527768	1882919.8740005458	1939435.8005164904	1831965.5261462952
A0A087WYL5	769653.3677841474	2504477.1483904207	1207226.7544848379	2002749.7312866438	1902391.2480623613	1210996.6975075118	1430043.3869283863	723309.0682123123	1668589.7816389534	1257854.4893186418	1235458.525475108	1541332.4919812228	1555410.0967491143	1454553.6419331396	1549657.4454862163	1523421.54882583	1362355.244509624	1479404.2494107324	1346625.338712637	1629072.9812282391	921255.9088275066	1330137.1098234071	1865793.3095266658	1639753.6687181003	1689272.3106091744	1358193.126395301	1605013.3175658688	1373880.8504103795	1443543.43937009	1450409.660605675	751221.982183124	1452145.5882516012	1539754.371675045	1388725.8966287856	1650565.4813019575	1660833.1773805048	2216488.885942894	1237137.3654327877	1206787.6559850313	1573624.4340640176	636831.32217275	1098820.6774434447	2964013.450836273	1288097.621166194	1483352.8383276903	1426193.7348295841	1595608.1905024922	1196706.1428768693	1486296.4119915424
A0A087WYN9	36285959.82981423	36275185.98037132	37960581.127143584	32267858.04910949	35832176.74520524	35433923.72712692	33882145.78955856	33434010.92236516	35970339.73141662	37343379.14879193	37293149.26600058	38692511.94454315	35074411.81201585	34297673.711628065	37659434.22140811	33403546.700912125	33960813.05824547	32913543.66327709	34719769.63127705	36670705.132718	38700110.25094769	39398258.39990942	46067109.00003735	38119927.62343645	31198541.77682223	32485775.61151788	33839040.46136506	31744566.33761912	34414675.109967545	28717556.218769066	32999340.03416819	34844567.41370168	46262202.64934093	31729842.56649421	34406881.32121067	37397855.92867356	34118402.790177576	32224783.074723445	34405543.8483869	36296141.02638619	33310120.820707474	32784793.64256516	37240414.47366569	35634693.58398723	35069523.25786714	33607222.52479018	37928330.41344305	36771443.22780075	37038484.543356426
A0A087WYT4											173920.3568003015	347545.23923806194	317458.6918663308	451604.0524600002	643823.084694866	389704.76538800827	461116.25342952576	370633.70960224007	651235.8625621257	512015.6001977938	195953.25509393818	471994.28704678797	542517.480638795	577004.9205646311	588034.5748976587	420300.58636142866	330073.85178355296	563860.902306631	160358.68760108855	468955.9294380672	200570.14982689568	416704.09371393657	262678.72832122736	412452.75907270383	532333.0660681557	435480.8217127147	693639.4528579187	414615.0758298826	484407.819523454	466168.616594257
A0A087WYY5																															366290.96980701346	192260.5017906993	315889.466467564	248165.9386988137	148676.05322665206	127608.83948324196	269050.15363575297	310623.0122660749	252077.3635699461	229698.42555725266	652861.1204810295	168337.4026535017	234232.3546421172	146172.89245956304	174348.84195378676	275431.66409983183	203362.80147849122	209519.60986569637	171715.09614370452
A0A087WYZ9	2945317.0158931664	2787087.6150881117	3352799.614259888	4062258.5955548617	4977882.586597724	4770819.906270384	4853106.376053647	5283988.254191464	6082316.622852364	4414684.065048418	70555.14173659545	2372201.007330635	2264012.513045089	4924071.336189415	5766429.158993735	5756676.6864779685	2734849.095978342	5548357.4784772815	8408389.951174378	5684732.217099374	2527545.7683504308	3579337.350288228	4443508.436151908	5966106.876604494	4750421.275505443	4647422.864386276	3911056.307753605	5457954.684390915	4562365.0785320345	3684555.913783929	1683254.7670130676	3625214.429043728	2665744.4898915705	5348887.653529798	5879814.874706617	4815417.54926693	5348486.145674107	5091119.610175487	4145300.93811686	4927036.733149326	3468808.449643313	4321001.014485949	4087842.9940091684	4325955.62242108	4643050.530269504	4140886.443667635	4791397.320797855	5000050.433322527	4420967.515765369
A0A087WZ13	21333158.74993424	23415222.458107084	26836346.238129746	25159151.2450236	24992981.032564696	24010880.330393665	26282690.799619675	24050736.65441517	26066035.910066854	24997099.51938025	19111570.9428677	24377568.267554857	20713614.33996009	23843937.98492624	26493648.61076467	25785983.39794832	23983759.4919178	24948714.0268564	32300018.63093872	25585485.937978394	17568371.26027711	19864990.688910898	23050485.57107014	24858772.18881649	24452026.979943465	28301904.17796062	28136589.88378152	25032658.74761271	31746547.04862354	24131958.658200763	18288552.06820736	23209644.85467045	21872055.49790142	22518438.54747315	28570934.626401197	25998787.71357245	29912149.068734564	25155534.06595381	25920337.80499195	25697869.70156314	19283095.396546584	24712037.25587852	24971982.35338043	25377876.271333747	26215348.063113026	26270776.179257344	24993836.14476333	25057235.14376468	26533585.27362996
A0A087WZ30	2680234.8202250013	2418800.152474769	2267089.6060446617	2575758.130239369	2405784.530069787	2396780.86782434	2238979.315655336	2314552.2903492297	2584193.8742834246	2342114.5894916	2557206.6705580237	2354981.792068427	2329797.763710516	1949825.1247219874	2363783.5191900483	2316933.381125356	3116920.2800613726	2376604.93271367	2530694.0665393127	2327537.036634081	4981824.023641878	1665773.4936194252	2448822.868764057	2734837.727264234	2179136.684627084	2050602.1811599643	2241820.8106388454	1823512.1229394225	1981442.066546042	2116509.952901309	3312387.973989368	1461004.7514616987	3102526.2370481435	2303549.412350241	2319371.0654011224	2031500.2517332346	2341271.5640978697	2567854.290158131	2555779.870724564	2229037.753666404	2327677.708262213	2039120.5821239885	2520622.224647066	2380307.356034204	2453118.6453440893	2485443.216461744	2220906.3325418467	2434217.643139256	2534817.263037636
A0A087WZ32	646854.6255645129	280777.4799234421	375165.1276798696	275461.2039417833	281576.15275457146	307566.44440017967	339502.80249780865	453625.0577864165	336005.53027691593	368937.5906265697	442040.1635475503	371686.6014468636	400861.57931474474	348987.6836886689	320018.7622788232	381524.3254862148	308456.7054668321	419766.4416551432	320394.89708317374	351735.1031291421																					1578305.6899136952	292597.92432720546	162494.20362738025	155971.48912507825	52146.65908379455	170461.68876862866	261790.3151143784	241595.39610969415	322300.7089337794
A0A087WZ65											122344.80366124035	108869.05507112984	95657.53684553133	136969.64709236802	104039.16980353893	134505.54532098895	101421.44572721103	145406.58408015722	93297.89824151744	102306.31020371623	166734.47432053348	123473.97822644352	71823.89790695214	77128.67559492918	130525.45100680324	127750.48706861245	99711.43426983783	98749.5602667226	124701.43160033037	124207.72635979336											101966.40838851381	113915.94391892689	117292.02087175734	117069.91054591324	99034.55208737156	115239.7214609578	101140.15797637372	110038.78607099212	119699.69680390751
A0A087WZF1	42217247.74604171	36330380.53045821	32502958.403846893	42857145.044335775	28173334.35352597	30112683.59272583	45876219.96271883	33529302.92955566	31289192.56372149	31085674.21462485	43080501.63403691	34662924.35404021	33618346.89161665	41166912.40222512	24212896.81302152	32647679.60239825	31596286.39642193	55518384.99968956	23061867.79837791	34408338.91334077	60531137.2832416	38858880.78668344	32110432.84299266	32605661.876399264	33236942.84206043	28454445.31944808	34042370.28100743	34964737.07676588	25877077.51481765	33292452.03042029	55688926.94992609	35986733.70398386	36876026.95861279	35838518.16154571	25080045.98776821	30610461.92794388	37693020.67164037	35118803.249538355	37375019.28482124	23706581.96117465	55004278.86865377	41797026.14936019	33543787.68255221	33920112.036771625	29595672.82606301	31767949.124074616	34928995.45522698	29437036.362178273	26246356.92367645
A0A087WZM2	9605950.20299954	4845131.221231991	5734506.98266684	4736781.7990260655	5402538.921017428	5850504.599381417	4488497.732292172	5429307.601797715	4596746.9995700065	4489854.37631811	9497728.149257736	6003813.459579965	7238656.966749318	5413800.615617039	4240987.798644277	5252232.3062677765	4023700.06118238	5104644.344043347	3553601.1968146083	4850655.715954379	10703397.081038553	5226731.034444696	3122093.224388384	5658881.2370154485	4063363.8392769424	4355100.133136803	4468897.359338795	6156133.22696863	5918502.976241618	5506729.807657188	9468023.550455227	5311925.414879239	4925690.557495742	5407436.296200036	4661955.876687341	4871522.481702996	5016107.9919938985	5539870.032834008	4910861.274388983	5066434.87153746	9963172.21526768	6869183.571231567	6103050.64581339	4098617.3454727167	4191920.7239120817	5225886.700052367	4777544.333675793	5400377.1063842615	2879690.0427748775
A0A087WZM8											354930.4135996297	199182.45399345164	195390.32975956207	252368.1249821556	148372.50369294346	143259.9076276102	364484.0837305448	181073.9321682261	212889.40304719826	216777.458995338	321796.9727587772	201513.54170470816	154418.7785569754	212197.00225317574	210366.68871414594	298798.6852466197	235851.81527389825	121353.76658015391	272040.2970944989	240427.59912147286	237724.39256451212	191991.56931253703	235532.39023274524	183752.42404011788	231211.0142072619	234245.02378392968	302447.61062090605	207321.66815978312	182583.35612984226	261968.63422761034
A0A087WZN1	23771047.09134507	16643954.44326214	16858117.296599507	14533214.782965982	14275807.507320112	14894326.301824067	15284844.027851935	16643954.44326214	16861206.183907256	15750740.900479935	25114549.52772741	13608479.535003785	14547454.139462575	13504598.011835815	17477828.01263634	14390926.60400288	16070547.877404375	13441697.273036862	17145216.530199453	20215916.233384706	28474386.12835205	18988040.07095337	16838953.685904853	14316599.04677095	15798177.061275832	13768564.190687213	15211719.097200984	12650888.132474873	14968727.53059792	14501157.687370913	23224428.28329664	19156616.894929126	14025153.531850267	14195909.118685642	14541110.883607093	16406047.345934315	17201718.87044409	17842693.86734452	15864101.702962466	13059433.708263244	26796636.16467469	16074218.126309773	14483167.854032213	15701624.449300954	15847462.8834837	14460586.419061985	16645340.25243188	15359139.352252444	14564084.662675545
A0A087WZQ7	711664.7818387629	414850.0065838751	468480.91814295744	342004.0573665856	385009.14164923993	353899.08067880914	312104.1600581925	352069.0770923132	423498.24933941226	369336.0464165087	514806.20339393994	309849.6258910352	541385.6853522697	352246.63976735045	361289.143938741	371324.95349259494	455344.8880850989	356117.1055679835	397219.3972561225	473327.1406986597	318983.1562857559	406993.7881618019	568605.073170802	481541.0087314092	640977.2026093765	362525.25837179966	400307.3969071458	351357.7765925623	253529.0250278271	348115.279628708	392616.4805946369	432981.6285818049	398396.7183111841	314588.63342284213	325655.80470944085	340937.50924762216	909116.6459787972	290963.654406973	334106.3192189755	393570.91687807423	574593.7829681211	396052.6734836273	322128.3271368516	405800.18535946135	396728.6315936099	462081.0453862604	410913.9554088936	366016.6218139727	344552.5026984432
A0A087WZT2	188229.56292883452	1399975.149361105	861295.1548372669	8020515.712634449	1177260.93389765	1409628.7691320926	933797.4444036072	343680.88080124016	947096.2069096986	892859.687532447	813349.701272337	2028457.6314978488	910213.5336502721	1437372.4334562311	1701789.6246122096	1278960.159874777	1130439.873710587	1065566.0083869335	4130187.61208512	1678036.5951826829	1035761.8987534528	1645804.2993535197	1995186.237129767	1925190.198225964	1798763.5920606118	1993690.5952728481	2219083.823110521	1345554.1965770577	1216315.7837206982	999013.9783289564	908696.4270456564	1754342.91474328	1596949.6455180426	1599567.4967206118	1485972.8918460512	1312228.1212632274	2927965.88348894	1685412.878847939	1351314.65344928	1551908.5087119925	593336.4941184439	2434843.4250004473	1630419.283488166	1493900.2400230442	1482235.888999062	1706252.7385341276	1434203.568090975	2078051.03845028	1468033.8638491111
A0A087X004											82460.43868631222	1832754.5721829531	1884437.4559972226	1471976.2383077715	1309183.1055057158	1472612.3353393315	1219906.8871262358	2601636.8590813973	324139.1448573113	478647.1138232945	36931.288970828784	669910.200745125	674963.0475896571	1069916.7812233048	493986.3933722924	890729.0230937556	689839.1308462307	5723397.281772054	871914.2300297982	1556166.9836193412											70322.2425431727	948361.9186536777	171405.93369246356	1144094.3982304437	1613177.409629934	3583282.9762577056	720892.9181770837	850208.4705313594	818242.1829643834
A0A087X011	4390410.193255989	6507031.501499821	4754412.562260154	6440094.964300157	6072287.9127063835	5253350.758893961	4754412.562260154	4606731.317500928	4794193.774659421	5065226.520818919	4351254.62636756	4751385.505552884	5442706.9283213485	5618704.318544478	4712928.910009548	5281193.46623782	6819033.368123253	5100532.95768682	4942481.507695195	5617927.132156499	5826898.299076157	6028737.992855833	5040890.236621662	5232418.463144063	6502713.088849628	4234979.356979649	4308906.29533976	5344726.122870409	4951572.705601917	5166305.563864501	6700577.463583785	4792556.470358316	5774193.813162035	5229097.232025129	4270390.781424081	4713335.116711321	4305573.84448717	5990140.611567457	5956659.06949494	4905625.284570424	7004638.18857803	6140726.462029178	5521367.476154434	5322772.553347996	4224309.2692879485	4634119.655558779	4746990.151254524	6194066.105564717	4766040.023945787
A0A087X020	24663084.122997124	21708376.519340046	20008158.541976776	20893826.56423167	22820630.01134082	19829536.419841334	23127512.74062074	23080293.65185253	19372809.576992247	21451938.000478007	30403736.76715229	20969330.255037725	23533923.4718266	25405413.12769712	15245448.70443702	19222658.976887595	23739072.06493127	24584032.7453432	16457476.0246186	17395074.421183202	26219375.98495214	25175849.413160197	21058164.15275851	21604660.84224844	23213316.16353213	16895473.282634117	22616696.608403504	18309935.30249041	24640505.71733333	17222190.391116694	37926405.08417646	28023638.31064768	23420406.512329184	22313733.30962236	11374073.67272356	20746777.47347494	10265300.977877947	21958303.64394756	20198590.263809957	20728937.06132608	37352693.23438992	26285789.433365244	20035531.13408293	20293122.456737936	19112300.416294426	18251125.7898728	21255187.0178661	18345380.79657156	16174764.098826185
A0A087X0B7	1051455.681644728	1203187.8889429423	1357398.5764576823	1168155.1863079402	1072478.8188005048	1217988.4587465914	1094662.095632102	1344953.4417534266	1253653.964841132	1296122.1081257113	1064506.7414275536	1348462.7452313723	1383806.7873233315	1110574.362853915	1318083.8297955208	1319711.5159444923	908987.485008988	1279853.722346982	1219902.8955323312	1106170.0356272853	835209.8452749492	1196373.7321837859	1655756.008144154	1305154.75893263	829194.2544957381	1333220.2638338318	1093358.0998526309	1343445.680348223	1201051.3163339864	1267298.9616240324	981952.6628757124	1333908.5873288142	1291657.1061407262	1165065.5860257735	1523171.3276122164	1298011.1206638706	931216.128447487	1310990.6887923449	1083060.7832057057	1141034.3772523429	1225188.1003671745	983149.9556573579	1616814.8066615716	1353051.009917325	1372824.948530223	1228706.3206138846	1462013.1158063174	897351.6064291887	1042035.2040201812
A0A087X0D5	2335148.937233021	4056131.70251474	3236427.640052011	3530908.7068982557	4036616.798924885	3632584.088510508	4021124.647309189	2555684.2719976273	4149227.8169717467	4379266.74054262	2632666.8680767026	2804159.3544332413	4598563.414252591	4281733.400379694	2976303.9034755467	4870111.2971694935	3821884.304095389	2982389.8218760323	3350153.17664823	3615155.074714134	2647660.6204177462	4009905.015470162	3933502.87999576	5732858.37726046	3438593.1362628783	3714308.2775705946	3662403.109325439	2180551.0291764433	2580773.249026588	4032565.065185725	2751959.828908005	4259247.761962588	4645605.282165028	4184650.076636946	1809469.6789007704	2797798.4895611233	3756653.40040644	4668660.779185399	3364462.375253208	3694604.71379457	2693680.0254464303	4529400.384902226	4791273.143676668	2911088.17210052	3121162.3455983168	4282118.776909937	2572650.2694849875	2952634.5540644415	3212933.00446502
A0A087X0H9	30005438.119285654	39481897.78983206	38501122.23865108	39468785.81722269	40830682.70558274	38361698.263238095	34938861.520137034	35374353.83706963	34565144.07682473	36758104.01311197	30254322.82041557	35660753.74015617	36393143.63853434	35206228.76287349	39412973.59774548	37286642.30533471	36216204.85981824	33385884.78004869	46291524.00750282	38178411.46310974	25830416.09123637	27462796.945959084	33571862.18905194	36827186.94740709	40872673.730329774	38788791.04894943	31666939.563621875	45780378.07570144	40727151.42859453	46757892.80009	26005965.44105707	29223416.86861133	33453875.50596197	37433711.57405235	45578001.35446744	36580273.62980755	45749508.68488597	38625834.16723177	40781680.4778981	34853820.16613501	27958514.25172568	30891009.34905387	33404828.941522554	35626282.30591424	44642821.4485426	48871974.01661712	30637719.501430426	35803821.91873441	45144525.42904936
A0A087X0I3	361657.4177785991	294636.98721123626	423692.25801145815	286344.9450748475	446256.97767510614	400826.9518203659	415410.5809277397	495024.5504897431	419577.3321012752	270362.03385695803	487671.7873182249	403427.17395245115	426684.5239130978	269755.4806062915	437702.7306806257	374958.50998013595	423903.17117772717	290827.05657575827	327878.0102518615	370985.999756384	807051.2365273313	474074.0727974277	256564.52273122754	321825.8742727445	399460.5743900133	364105.7251673917	441333.07224512956	346012.4609948931	306601.0544202761	96602.07602042746	281558.2239819973	196589.54815619148	505931.30571058404	691325.8789282773	460964.60378957953	480897.18431462365	298344.10884865274	292674.2684273921	159150.184260814	446351.93849970406
A0A087X0I9	6272867.383203602	2025177.4918356696	3674166.2238751263	1945842.3422057813	3084096.156743158	2266449.4545740993	4892235.79731191	4329184.727990722	3822829.260633137	2550334.760383232	7390851.1062372215	3789836.3566418993	3537986.905000378	2972500.8627246567	2608101.0321341744	1961509.605117948	3289661.976310471	2678315.778810373	3692937.249105184	2941483.22266809	8766761.219620423	7006571.9878195785	2544163.841669185	2609584.43154876	2041377.115555776	2506828.5255186493	2983393.3922459013	2256809.2629665867	2224085.5621682187	1923606.6479139603	10245160.073112994	2322193.434388786	3134276.6260435637	2013601.3716470432	2346376.2541974983	3337148.7920082686	3109541.0560677955	2321148.99366615	2835254.8539849236	3198479.200679904	8130598.973463452	2896334.697660371	3677768.9727765163	2395530.279207722	2590349.8385816733	2745584.5472461763	2580802.903998806	2833637.1236608746	3200611.97494376
A0A087X0K4	5385022.459495447	1678300.4755685306	3078918.752717521	2320323.181672838	2105127.526657069	1770324.6244167453	2991471.5308876056	3436283.6689444077	2715785.558938926	2961809.303818846	44075.38231185631	483647.4424488701	1278025.600713005	5532401.513623275	1771681.5543389472	1022467.1675030087	799513.7208506209	2874660.3371182713	13740256.058808355	896622.5406678059	1842297.7527648385	5545950.24718327	2125312.361790628	1657225.072210583	2990206.472895665	2733395.223591913	2524134.826371161	3940857.0340000987	1791448.5756818622	3292461.3110879865											704480.1661315344	5681829.658035627	4982068.973196365	2625096.14315613	4979939.88389158	2387312.3526334167	1696124.8007280892	1383908.0481101011	960077.337170946
A0A087X0M0	2120965.679095693	2895158.3746563494	2424478.4877201705	2995999.59276133	2736806.1493508727	2414762.0161840143	2593335.006578249	2539675.573680373	2215793.1891418085	2874937.6095675905	2432923.8855266683	2409519.462232632	3246625.242963018	2274773.607733956	2288634.479781881	2547446.500480011	3458173.962251832	2384069.992243	2383388.310011135	2386342.266349217	2737451.3743012077	2825453.615342215	2984007.759648509	2744206.343762777	2763908.338025689	2704239.441115156	2889438.187186531	2377936.8885132084	2212252.4986641463	1573007.2219509138	2732589.803329099	2773435.7634257423	2222959.6699158163	2323965.96448532	2259584.716564596	2553242.041264225	2703026.9854063173	2664102.6084746555	2719122.2973864987	2859874.1582744075	2961073.815833455	2788134.4914673488	2227354.2128157318	2428847.76877136	2207986.9948680555	2303705.7451094543	3153007.911648243	2245107.4959344347	2355475.808469588
A0A087X0M4	11209391.936326526	12755768.021818634	11057724.76771555	11663694.515115168	11782965.017369205	11560253.312560216	11462976.646535905	11904952.2490444	11921598.594458258	11445629.27729662	11422309.164901167	12296948.508550292	10988212.19159622	12184179.924717885	11540674.794958653	11343888.443300284	11287204.124876635	11212714.785097433	12590947.17308751	11897871.870683208	13360520.855635602	13609267.933320178	12317972.804340005	11104288.5153374	11375799.454110082	11018444.497436468	11331130.08452588	11687083.64921254	11467765.803254027	9492678.971638827	11407827.465566276	12357147.935522338	12955638.555438304	11789899.654709086	11424874.746732716	8748345.05809453	11732791.262801515	11394402.731647706	12272976.984763045	12681046.277684676	9926235.471831007	12486388.82963469	10874723.71912009	11622805.578675514	11885169.666433707	12267624.604856726	11637270.024446676	11621275.758921824	12651609.363033433
A0A087X0Q6	3174178.3067979724	211724.76102194792	417668.326004476	169544.80993987614	259679.75138514407	453051.21592838	214821.61044455512	1105199.6816147566	210715.05266149546	243148.8553618828	4128074.145649576	163895.28855367872	748448.939377564	168852.21257360803	168144.080570761	165525.8556654976	433069.3073727364	135504.78575532403	148260.47933292415	199954.1155407587	1556802.1111420873	1887190.5462031218	256043.2706364518	393180.8774086713	137067.70794956913	233819.32830154	291202.37842961826	557248.9472409317	161648.7939149705	985495.7340125692	951492.4801382619	31402.605740508698	800567.1625657119	30371.477731046627	117230.36295170158	37273.483597710685	4292886.19407415	37849.105739150174	135551.99452678786	25105.861095737666	532410.2970770181	526427.3346314904	615598.743712334	824002.2801340502	688806.89168511	617973.180988059	691863.5823078252	721949.5692103356	498240.5715025603
A0A087X0Q9	658008.4705177344	513488.65730086464	481588.0067409785	506898.0486697293	550164.5392641481	515764.45628926065	555058.1648345719	647681.8681715445	413537.6705157037	622990.1068928202	1024470.0318423351	521038.0663525461	542839.0848896735	539909.9653165471	438708.8840650255	387292.37441532227	904648.119018795	372249.2531790511	346514.84550086805	387417.90811131353	888010.4694713266	570511.052718405	545301.5036223874	539665.4293463754	464732.8032791554	419683.82003484655	534119.8944161627	540406.7202401079	447502.0340317091	515253.7582352149	466842.9028228856	574851.4726552034	469726.23962972354	552606.8359284064	455812.6058469394	493590.4527756803	742698.4833681544	551600.735425595	636873.8877980373	520577.2583358511	577137.7336704924	659307.7185018287	631980.2468125309	546305.9538045641	552555.2733269648	518955.0358948358	645474.4484479141	387042.99264277396	554539.1842864571
A0A087X0R6	18300989.2305106	22237211.836246755	22929840.923332963	22605369.532678913	22570081.725103706	14621503.068787867	20532314.05447254	20024530.443221986	21402055.294364285	22246554.283302296	18331467.23141275	25397140.57246416	24281213.21727303	22493682.912526	16437446.721267555	25741159.581602734	21662083.50175642	23579288.884247433	12886901.860578015	16660062.175407425	17128923.291584615	19058837.81033856	20844911.48662321	21376559.17992856	21578542.19434825	21038316.983881827	22699350.29655689	20880771.70897133	23973429.00740189	18890810.543716587	21805830.497801486	20165404.970804397	21206005.687031407	23299567.63281848	17810958.940481424	21221456.32869773	16655019.184215305	20494712.221959624	20844460.672039393	23967035.35280373	18697677.7855146	19777205.688512206	21376349.183325954	20676458.794349115	21341354.663877115	21221524.94576441	21799464.736661952	20093471.309131075	19302128.5759946
A0A087X0V4	551202.8195615661	718776.7758724412	703250.4229249415	478515.9734688176	592537.2677202398	560608.5389417886	651138.5879764297	482930.6677367406	752872.5086257476	682726.1288950102	778792.1247649456	864191.9346661202	698637.2759473501	613618.1487054675	433301.4624208181	684298.2291140176	512610.3497733205	831326.3317472432	283587.43213592103	474203.699258082	279304.25514925504	547273.693880011	579718.9056215965	773689.9197025864	821167.301488475	740871.2378977884	806648.6527810892	648157.2947052864	640081.0045883161	337654.28415041737	710373.4384046919	785712.3562280516	686847.0746745514	551376.1350041254	526745.0550640479	576142.2358143063	630042.8399290239	544829.6685748689	543656.7600062939	618832.0161689222	765705.2786719751	623020.0806903418	504287.9607108914	640116.0030291547	620410.8129341125	645292.7902575134	702874.1111019779	504747.19183598773	513086.41158489604
A0A087X105	5101716.9109384725	3546688.802928839	3344407.081764835	3913078.966787119	3553713.045233968	3771098.009437435	2978248.815149855	2659412.5472806133	2785534.725411048	3016466.976956996	6208685.363768406	3417235.4481624686	2788879.368005294	3441540.305283933	3230760.894654286	2398903.129446208	2878958.3864893643	2883489.8005289594	4672437.137130288	2749469.7974185133	3477052.09003113	1397863.3032245145	2988314.8312694686	3929746.5331084123	5478674.079950167	3195685.5933982483	2975110.205246852	4555845.1216902565	2467438.0110565317	4204635.288673594	3750353.3962950963	4349232.622911376	2370387.4945437117	4627500.514554843	2352789.2213632767	2555976.2706605243	4738238.993388934	3636387.286572018	3266362.4596558907	3023137.4176642923	3655192.15339779	4406685.551887753	4031661.202942945	4391192.383380603	2932144.4115560036	2948434.656256449	3129271.317610017	3675119.0582301393	2354463.440466204
A0A087X126	221616.9391583849	270878.44773002435	621672.1857074797	641476.9008831774	712362.5468158864	785303.7480764466	947416.2235011678	1002035.8868818806	1361410.9426546958	1473764.6152860585	323870.26770354673	533598.336609365	608124.5648061319	761024.4144453554	900375.9947594409	1068171.0595900777	710191.5372048188	1023320.6280853898	994733.8514554055	1114526.058285817
A0A087X1A8	2282873.297133856	2329481.63062082	2164122.7437588917	2048896.5859716763	2466501.499899625	2147363.883106943	2169157.594598533	2314161.2987801973	1875769.6435285874	2324302.9269000464	2418378.5586673403	2285042.123301291	2465473.105374996	2503153.157854874	1827268.4122570332	2429379.5504373317	2295638.396310513	2518969.567025724	1470821.561863466	1908506.505327739	2313491.0411676187	2311387.5133645697	2365533.877183782	2280613.6806903416	2042377.4707295243	2074756.2172090416	2217118.304413136	2078675.0115976841	2262305.1979601043	2176372.191783715	2493955.265356802	2318200.594941248	2468627.472116713	2456023.0304103782	1830438.428362931	2202864.00783691	1663726.8503225353	2358398.062099989	2241628.6115752617	2088770.028429093	1604044.5989158256	2103553.1074218336	2683615.367086847	2095191.8496248603	2130335.261302763	2062879.0720969744	2195614.039623924	2573525.4727600343	2100345.345706599
A0A087X1E4	4936394.400371862	7244609.875028859	7208866.98614891	8090166.047508152	7962428.283483875	6785335.2847822765	7568772.038937079	6391022.318481962	7169476.600054342	8281153.652547402	6451026.292403407	7101921.8503587125	7907399.884473707	7986935.230073761	6477851.205551984	7982133.883751447	7506174.335278679	7801979.019570745	5561680.219517943	6861123.894585319	5972698.0065408135	6561932.065316537	8600176.25277878	7443858.762389016	6829655.930502282	8081862.849779177	7579846.3822122365	6980144.924196166	7777277.635576279	5810775.392138247	6038449.5058107525	7002452.129301067	8051981.095617804	6875936.583046954	6620888.576033225	8004950.316466819	6022781.747220299	7358529.217453951	7527583.324187709	8134674.590343319	4989921.971143656	6373874.671268137	5803906.583013448	7889092.112781437	8712898.108865703	8467045.247372523	7307319.904613761	7123090.977840225	7736806.553914789
A0A087X1G7	5217115.232954874	4609994.653376808	5203627.387872485	4596833.532492069	4791123.846517991	4878626.4509285735	5449977.432899015	5289664.75991977	5320075.242931615	4970396.57601305	4654090.977118813	4496847.288004179	4582042.434319566	4919336.591883949	5668495.7932512835	4362545.710907906	5364007.566990466	4585200.196928836	6494679.913513535	5200190.576117758	5322171.616452513	6016784.47368529	4762906.380294533	4606967.045078405	4771486.261186755	5271121.325143795	4590450.774360878	5106673.608042881	4021533.1721991487	5857341.687104837	4961777.629224534	5527813.902633782	4360094.939136428	4679125.607885003	6523155.203738641	4913754.526798472	5093284.624443185	4881766.523898784	4708264.144145234	4678399.541866295	4998378.708646921	4895115.298159912	5054076.553669202	5000297.13825391	5043677.219196632	5223833.308773828	5258992.963419184	4870255.936706435	4807859.9298710115
A0A087X1I8	6218065.1780602485	6925371.704212587	7945081.306941474	6846463.1275836285	8296494.897763588	6916773.581627358	8395650.666286796	7564961.081036419	6692251.638635645	8259744.8576815585	7432416.079489756	8212894.964275672	9391012.621100662	8682722.31822804	5916937.1165232975	7626603.364836522	6746744.865616634	9827332.441614944	4025716.5846981336	6198472.585985151	6109545.030904587	5475778.867132015	7399428.2765224585	8469625.524767656	7788804.796631456	6986622.5045740735	9165837.016664457	8269545.595879827	7993403.924305045	6402263.633383308	6982949.012321075	7969678.387124955	8061644.554713775	8706045.495988008	6000632.993132413	7852456.6006975975	5250362.538545116	7573624.364429689	8130651.068813017	7532807.202670434	7872786.005993767	7560360.561689918	7528657.130372537	7686854.459392392	7223773.471492205	6943191.12119876	7968175.625331958	7584801.532969832	6576576.5520000085
A0A087X1J2
A0A087X1J7	32642.514547275958	220395.89697156075	64669.36998214088	230968.20662058663	162231.20875610606	77628.4071575504	76294.75867153738	23727.619620490164	69924.28052608526	85148.00380981881	75765.53404657793	159082.41407486802	73145.05015042664	129774.70456227205	61769.06711889924	93318.24244162877	91891.03079715051	110932.60928129488	113939.36519812453	133998.30801842178	51935.9773848545	91429.8477470559	87342.05344046517	55628.91611531293	238908.40543247067	107053.65943843825	89783.92345075704	66934.25471615356	102695.7007902833	151900.94013809654
A0A087X1K9											872954.3521641131	55139.40736634003	60476.86362223282	57659.8026867965	48868.401228414885	49570.2994493885	32449.537447870487	61903.383387880625	31053.315447156812	48317.991832111846	499037.28320538346	55122.9321838066	177983.6575077597	105967.92595255408	107506.55581922206	66953.60359479909	68543.40212679325	50214.310219378516	55122.9321838066												404142.1476083896	127096.15495478312	143961.2818320498	90037.89088963221	79620.78398918704	71926.31238949894	97170.45030068056	135597.79323428514	119022.93591302847
A0A087X1R1	2047508.7392395232	2334425.9941853853	2217706.639150475	3261763.4090795415	1719092.1334698524	2091536.166730199	2593262.1513854275	2672138.143391691	2121250.790937687	1879022.1527646044	3674106.29127457	2509676.39423729	1838721.106253759	2314839.255559266	2241134.734984911	2478251.0492892223	1550792.426502648	2481151.850361352	1801324.9457655575	2047699.650158415	2696385.122318952	2155528.321060383	2288465.274868074	1787814.1415808557	2169470.0908984696	2108583.767933702	2451137.409658558	1674428.3415695438	3777566.105660243	1828332.410172794	1839378.8932441159	1647365.2361899426	2190337.8232256444	2076654.5441160863	2705696.310563043	1937241.8918646772	4341724.630951304	2007890.5812686074	2042843.6919518774	2148559.717890984	1739217.5643781112	2053555.6241751863	1713807.5999625411	2619116.332156944	2507081.4890519297	2699441.2196689732	2177906.9500320447	2235236.8697465127	2247206.8529835995
A0A087X1U6	66769967.46613257	66206411.82891653	45358060.78235343	35930308.31690535	33801403.23601247	56257845.93407833	57152970.70530167	52753357.86100797	40667965.03105156	70380677.01205476	73972107.47671053	53013393.51860201	60772945.91547394	53419234.10341239	46191833.63358466	43024378.66490815	34669002.9608447	26793176.86272241	75794279.38420174	57628615.63868331	77716433.7387063	77716433.7387063	56763739.80097501	60456661.28658866	32137794.768931717	39147583.62744311	34164588.80357173	40225565.52363487	42679876.40703421	64270289.38896859	76191436.04008867	52719642.32727149	50409834.26909057	53163547.53239305	50399858.35388912	74382725.87625729	49662277.55279884	43601110.99470439	31362742.637160826	43385792.37575257	64555486.38481499	52586249.50512593	42205708.93906844	56121505.10692374	59084244.95810089	63503312.07032482	46902774.0059445	50488765.02317403	49391266.30609072
A0A087X1Z3	18954095.1462554	23350497.80784056	23919296.108958986	21980551.25183614	24583011.09141764	29457506.09431918	25220467.54650615	19919052.16542607	20607680.58365241	25554605.84523533	19806743.071505833	31381715.49173173	25632577.77249787	26550270.71275509	16664186.559758127	29380657.75249227	23071584.363346044	27650929.53837598	14483664.261331918	18924435.450448547	24752924.02814319	24168231.62615053	23597712.19905958	26985636.57867677	29723832.04870394	18865717.140672967	20766771.79156084	23869774.844006866	25243623.5237158	15572540.945863284	21328448.71476616	23139937.74903369	25852665.108807463	27425835.44396642	18398136.673548736	23139937.74903369	16925255.753007118	23472108.446148846	26401133.00404412	27463306.74481932	13524810.972331047	20603476.591215927	23647762.45659712	26781470.87450471	28135761.08690379	27160178.982583053	21027385.776737604	19351501.89209279	24106794.6080023
A0A087X254	187274.80861613184	246075.75521965825	243253.2848326745	274802.5781307159	237979.4755239568	260961.5576031647	266185.4668829412	292635.60097355896	261669.51426376725	253317.4969197425	119374.96579569294	227489.06303122354	416353.9432879664	170349.77860390008	187699.2149989504	328815.19327719073	405277.4124895014	185557.64394393642	215810.7236578053	267425.29693307995	291908.999784445	159839.73247972174	198212.7465358929	175191.9066179759	232132.98691355015	225458.77392208876	224147.67945008184	177250.07756271126	298014.2472503185	541952.03193824	253676.78925414567	266138.91633787594	264177.4798098015	277228.0378519541	203989.39891974488	287434.5129283988	185923.16747008753	295798.6386945449	255126.8512588293	234657.8600622807
A0A087X256	19207109.289318226	15615760.12103141	13559464.982001515	13414724.633913685	14248064.659383113	14646364.43695078	12194859.027775893	14841086.102444053	12811807.719812395	12925938.548694987	17718700.609698545	15599668.352766542	14782989.783290055	12873799.17584906	13457397.107612045	12491984.079543816	15791986.19337499	13233970.600179218	12433598.794200676	15081083.669725088	17699774.70254518	15777992.14771564	13600747.281538215	14871582.703664092	13200839.734104887	12577335.11790874	12632203.524134	14032179.222366422	14042155.29622556	15030368.545922045	18804623.85275707	15712695.96547252	14859479.38580199	13650046.521142388	12169030.115459844	13813066.76492377	11498724.977684308	14897662.955872625	14846437.766299482	13213411.463174965	20920258.954389706	16070420.843302354	18347028.455031365	12315789.4499729	12531867.078362267	12680068.258031804	12864972.747546665	13757017.392375473	13895903.950554855
A0A087X295	6643907.75160395	9319140.70926836	9433379.033137199	9602190.509784466	9274945.311201856	9375955.457064563	9503947.76517827	8241355.53441012	10374987.310665598	10178501.821453208	7917427.942304567	9995116.513955504	8737871.184147771	9934637.88044083	9330701.689786548	7586086.81669659	9465642.21951856	8655977.518481104	10680763.427790733	9644082.167825844	7341762.551433657	8258561.873374581	10844664.69125165	8658159.540147036	10325881.03270211	9285288.37049182	10673165.440259876	8864072.091778837	8847621.777736628	8849134.450292233	9665301.757031977	9306315.02346616	9694418.909477985	8817165.881537901	8122966.370271553	8922365.636241792	8833213.30174697	9591768.911540646	9923249.178170327	9071547.20929646	8164773.036858196	9633905.11300538	7058711.175755693	9553238.034535656	9248514.727519717	8924991.889504472	9535634.83732722	9404550.834813913	10972602.624982873
A0A087X299	298353.6425756557	231268.9593413629	293112.3683245849	223869.51333985128	384154.5715784778	351691.3158365519	336148.852053965	317994.81909437396	311955.56537255197	317886.0037119988	241531.15725911185	329304.9466754417	305287.7005257919	237342.6966375225	356969.21829315845	340644.4376265738	231744.46146525195	257110.1876199013	541414.7220072922	225094.00325877726	241945.86606932673	364436.5945053125	235109.15883585886	273683.6969830066	286820.24932109023	366192.99529723596	349954.5728813404	530068.5031474469	199152.65205780446	219056.3183904307	227826.83121785673	507760.8160562281	243372.66205389865	297351.4937294833	310834.84437862784	310971.1316156475	258382.42975766328	301303.8236030533	280997.0252871248	327643.60361105204	244237.20916445443	360759.2643678161	329703.15815356944	355763.4745267949	327002.9021255745	241309.29689053947	277999.8951913049	272004.94738207955	239734.67452292645
A0A087X2A7	6642403.870487957	5360099.515676491	7222638.176969578	5539150.937398197	6114437.770384874	6738997.400627299	6883382.851602133	7667136.697021943	6732939.269817168	7018007.980716201	6555927.107093993	6525394.214246096	6987985.934200684	6328401.875450325	6555559.240915103	6430300.807002946	6456603.238793605	7034153.139651421	6614417.8295375565	6430300.807002946	9281403.194289628	6732351.830725107	5143371.292570777	6139656.970334358	6065696.75698645	4912717.173415257	6794326.652460821	5984073.222203052	7360453.17622922	7505150.912194775	5356990.463024864	6336048.5637650415	5889906.600222738	10756710.632774064	7468276.228609377	9079733.988869727	2693067.1571389358	6095228.319200705	5304838.308151058	6938208.738526455	6401793.428469477	6020978.871239003	4955353.147761384	6686932.91841557	6684352.470542755	6911233.387360286	8111637.88819495	6334404.0397909535	8196395.676017422
A0A087X2D5	26782290.484064955	15683567.202218648	17527036.22004849	15206994.71817333	13933246.442634026	16079399.642512433	18204698.46373673	17518371.265793122	20860877.369801875	16443808.626199124	24533992.95340421	14559236.628727995	14746372.497625098	15288356.710690795	20517449.74436357	15725795.74560169	16044016.594897455	16017421.768875618	20022417.321044974	20785232.13051448	26748536.53059737	18964945.008845635	18468711.632416487	15770598.699430328	13950495.04856311	16913984.444177616	16768554.49650517	16016317.64630843	17168323.370240554	17469824.481268805	21234584.25405117	17492840.640141387	18898254.67395978	17036544.662410334	20884229.66381809	18694681.642912105	15118307.763398485	15544333.491992585	16338086.691583693	16998426.57090455	19995458.6720114	17666765.04007527	19635218.773148347	17417309.631538168	17561695.069573548	19004798.950138014	17809885.349894397	19753154.45432375	15838761.981856532
A0A087X2H1	56078829.73697521	63107445.12697271	48190588.60795085	45320181.52604224	41310740.01802746	40254590.49342501	37349191.94404418	34877760.363868035	37103387.49771538	44994660.81629539	61183430.73816095	48600420.37898611	53286037.59055553	46164755.61510438	33241118.685928497	39027219.96222844	48947360.5517765	41977204.66845872	39027219.96222844	37132607.858847216	74569395.54699513	46896159.72981309	48893631.20062195	39409423.58870825	34504107.83469366	38002107.89233354	41923815.40865717	40062560.17862282	52476831.15902019	31849342.004144143	52564792.15419849	55803251.17766899	46132782.55648278	35762399.32419983	28237556.610444617	37675024.61905132	40946568.63418008	58586053.74070718	56393572.13421999	36485376.67548139	59449924.9777894	43450266.15548361	44007858.7315951	43585010.02555701	43450266.15548361	42846658.65804254	39636441.20528418	43259439.56996973	41071024.04673606
A0A087X2I1	65990180.28102268	69903086.27267967	59181921.79274354	62143166.54281943	69041017.66030051	63578211.27218777	60847459.18735527	63537842.500309	51183696.08695371	60832926.4294789	67790921.35309952	60660718.25282421	62999276.52833136	71849585.22584306	52273976.37764951	65168769.25686855	65552711.66031002	70210194.79296653	49006102.9665397	60727253.72614786	65603353.36312514	59190630.5253192	64950098.70907987	66238087.10670342	71812787.04191396	62819520.33759838	60240561.57174385	58684606.95493537	56459303.95899278	60240561.57174385	63210038.69970675	54949955.72882524	67320785.5640542	66230225.036225796	55897567.51939073	60029247.15124802	66361714.81825975	64903337.96695467	65453667.54916897	61882969.48607685	67922758.78434967	60208617.43833994	64753250.70303504	65035096.20013929	63600793.49245577	61648236.09312186	60193572.30504255	59827474.06147299	64562679.01460157
A0A087X2I2	25868456.48989783	29182028.3808253	28612138.65909621	30542325.81403341	38946224.90266772	32918486.73024355	32735015.19868392	34464749.76838341	24638574.113025025	32390518.79591358	25076465.26015969	30525101.61125912	32980297.36332456	38046792.36135582	26115490.115560725	32161066.227335274	32071150.61484865	39536644.10714121	28619727.34126991	25165781.43522973	30333538.83259433	37407483.10929339	25856591.642532676	33137836.04066067	27311982.517221093	30869791.918330666	30580215.252033044	36040803.816502504	30741091.17775395	28019179.29732512	28512070.92789321	32865124.99341676	30431771.48394297	29798059.888393346	30081497.301246595	30341418.07285875	26529395.2820357	32331668.55263181	33882529.15658433	35524980.88958113	27075902.76065228	37322674.3233268	29448800.390185896	30403209.35177873	29509070.16025188	29811244.62387037	30001135.68024265	32378901.95133899	30077092.102791566
A0A088AWK7	340262.64435579506	443213.1871478824	721837.0206479221	639743.3265026988	479472.5237458604	504956.09672439954	599443.7227226836	811686.5848300919	1028928.2468948676	702542.1681526847	570909.8137257778	528690.23332055	614843.6257338967	399628.03336266865	877757.2706433039	514958.7080066689	644621.7726500997	413235.85124128964	867507.2260074596	839920.4679444372	548659.9433038422	579340.6756498001	694140.0525358769	690754.1158580572	738594.8674215366	618935.4045557323	636325.7596016771	730510.0798438856	305241.0398263021	729565.7029473508	514418.7161897472	459037.14766897366	371244.3653682802	466618.6619507278	868714.6976668257	835023.5628446628	726874.0783818702	435038.62812691904	646350.5173158371	948765.4951046429	512138.57255565905	605873.7240891486	471119.31054285704	759632.2621309252	668468.0524853074	661936.4703917953	685410.7911427693	462572.6658885803	715022.9461305542
A0A088AWN2	2173758.629788849	2729869.528921364	2376308.6654175892	2198816.366155291	2462681.9233473702	2384661.244206403	2820039.413573333	2524028.7670811675	2517448.263814935	2437244.524308709	3644085.4980010106	2226248.7877016407	2683715.237263475	2296201.402478545	2158752.2465254865	2572054.854118287	1929041.1405887152	2175876.5374640455	1792820.0214360312	3146048.35118235	3062273.8170316573	2262524.3821446043	2642315.695055861	2433286.765565645	2648254.016916378	2730915.457214781	2651817.0100326883	2031571.1683453585	2638040.103316288	1523844.649271113	2171770.275464391	2582159.6548875514	2900326.770067853	2247200.5719042253	2501872.6794012897	2246669.372633522	2971604.605922992	2285371.033784745	2601662.256683364	2116222.0088708717	1947899.687510648	7196635.209125231	2970126.796248425	1747505.5047825987	3075459.010755596	1513599.7571826668	1473226.317378533	1977679.8480224598	1091418.0067288235
A0A096LNH6	12210197.973507624	18128915.94839138	11946971.62210434	15186981.343863335	15366505.96833796	11712843.125512978	12705292.551430482	12541328.499750985	10438809.779249858	14471749.014446327	14299018.008368645	14299018.008368645	16456039.567096764	14993334.75915924	12509845.952591622	13098411.669076575	12361768.457510935	12904686.713990806	10733013.688071324	13054457.267502494	13589015.314232787	15130508.51657152	13664001.97006724	15369787.995567122	14692967.887641896	13659937.409140585	12973005.98772492	13443325.333805002	9656094.452253353	12530949.998432772	11820250.199995888	15333598.502699133	15013072.641746812	17569032.386526916	10983754.283522395	14530051.885470772	9384070.386917382	11364712.130879853	13551495.660928892	15159557.60740156	15425631.848725155	15445890.65227883	16542760.158970544	11563918.009422667	11050694.986062957	11466482.811378812	13901398.05754406	13879335.255769178	12602905.220246745
A0A096LNX8																																									1319591.532678362	889528.8730829154	982235.7092618874	636365.7014295917	950048.8092490188	1307744.4697024506	925997.8440509328	837073.5038823424	1116193.162308793
A0A096LP02	18407214.598466367	15382275.98452032	19264840.234529637	17517114.325581424	17301600.82667396	15457927.12711626	17131371.732694462	18988805.82154542	16601920.015152462	18044089.114005845	21588849.84926741	17843775.021964747	18418215.31762408	19429371.27484798	14848047.570238525	18585655.041723106	16162254.707062226	19943419.775520667	11556949.986947944	15720624.124498164	19433596.346539788	15976972.205380514	16777803.70514577	16379946.522355044	17421193.77891084	16938993.43193558	17228111.513320476	17773086.30389555	18587543.452708725	17579914.48845697	20619395.299672354	12568016.05622739	17169840.617924098	17019760.439974874	15073761.018617148	18001358.59086329	15871187.64954712	20220295.259362105	19064761.42171964	18488790.453079805	20052675.49232941	17417799.18435781	18773787.262806885	18104743.00830081	16921421.06009193	17097527.294244386	17423534.31280371	14298894.903577147	16921421.06009193
A0A096LPH6	657520.3659531715	318508.7485247011	448487.68190875475	302412.2861861186	395771.767749897	470479.473578843	411868.2300884795	603214.9261383789	494805.2522880258	505791.08783410845	348854.79903046536	439901.67186918954	379772.5242269861	411170.8980857146	562298.8537004213	435143.2501133317	403264.2275923953	436320.83933574095	671526.2621871575	520614.5984704446	418281.0595483858	594519.7358552946	373639.35704922455	527494.541738219	277246.27024502517	599885.9274092162	438889.7407301782	473258.42282261024	418134.89868894045	487519.54667991935	444811.00440091774	479784.1599490561	763498.7477552274	465312.892346889	356939.42399543314	439502.2815199999	392301.2935620488	394011.6352433486	516201.1104229671	356506.28551770136	475626.43877066177	425882.3692862965	397666.4195680516	487935.1497340351	502047.9743610706	482498.5599034829	432439.255504768	728823.1219762528	453593.943141582
A0A096LPI6	18493046.50755144	21026172.38465324	20261525.450359304	19730765.871496547	20791844.36307682	23194599.31306378	15397482.929990312	15123510.150726793	22782439.708807334	20036633.762444712	16666185.653019045	20267361.651347734	17498445.485223684	15299882.82252935	21294562.307303566	18645156.21317185	18737613.51793835	20622781.93980078	22241385.145323426	25564648.89445463	8853562.113026474	17144318.114764433	10226527.295897668	15436186.511241265	15278213.842266573	21689539.98582445	20697127.738581266	21472451.15004501	16109988.30339862	49930109.83606876	12666929.254162135	23948477.402010825	17529390.668693233	19489956.91510007	21852921.34847434	18503888.51444824	25803623.037135456	17417541.971357238	19747080.35725179	19878213.31274916	19245895.04509392	19407157.372459546	19883842.05476106	16861099.038482178	17328907.605776794	21104881.54257373	23988175.93521925	19088222.58184686	20257392.052620802
A0A0A0MQR1	5564331.013672998	4475583.614376588	4876431.174864822	4801723.926410447	4801723.926410447	5262919.1762908455	5246213.284048536	5246213.284048536	4846210.403505138	5165030.1560170865	5715627.97706217	5128685.715455992	5865839.329971395	4807193.287426039	3619118.951295729	5464081.293516667	5422945.169198968	5235438.974660945	3869948.9776231567	5157495.335622742	5560423.337025665	6180024.169431005	5284722.450684083	4523154.825611114	5427582.981029525	4394171.291439987	5122148.1296377005	5070156.658957364	4563132.399430109	4160864.508100097	6080171.683746552	4887069.195551411	5040299.4703573	4943527.631513819	4506129.317960852	5134513.958442902	4090215.561049626	5018379.32100405	5543739.259525827	5042336.920136929	3954535.418629084	4409195.887926541	3671964.767643667	6005214.733864753	5877981.794984007	5505005.149342306	4899042.702617405	4888846.0693763085	5029300.711916587
A0A0A0MQR2	4162971.352718758	4430732.88652522	4784200.715007686	4788062.207405177	4408694.125037105	4978688.076003235	5466338.05616142	5921928.231146294	4756793.537259645	5350220.1542866435	4100317.6133069536	5547957.895630959	5413959.346313478	5434413.756251827	4255611.9264031565	4676714.0196811035	5330748.526935799	5762387.237712205	4251604.255234865	4274917.849720323	4407860.05748057	4871377.417854015	5486437.142396712	5179518.995804195	5088841.526057797	4890789.195395608	5066555.500446599	5021125.4160320265	4547029.452519319	4489095.899629426	4024846.010082077	4702775.175345537	4123444.512957735	5790817.211722462	4579629.290464497	5047905.498441133	5031991.042160932	4991449.187056063	5476084.389197822	5279687.551639365	4444518.559264615	4344867.742400014	5494153.357548761	5169712.408342442	5269670.315551772	5332623.836221241	4877515.94533268	4304792.452412863	4799054.362254389
A0A0A0MQS0	342424.20866202033	2860967.8920320207	756735.4982448388	2075562.945800039	2556309.8519670395	1486936.1580319318	858425.0122106912	899918.537447525	962577.5371720031	1027830.908478365	1055726.2185182087	966983.5953681205	1150471.8063964616	870068.2612025794	2022420.5143813568	1071348.391786684	2798517.063881484	888438.7797682864	1597497.401478831	1406212.5687915005	526922.0165746807	1289121.944280183	1422346.0548605775	1727811.6034196068	1634445.1483448416	1663277.3361490963	1247161.374665276	1117838.7874406253	1203958.4595095424	1994802.1293473758	342535.9624263685	1199102.357268173	1395538.9037013787	2320943.730863186	1429144.17582305	1602691.200343559	1130094.0583662577	1361664.6761583465	1949077.4719599418	1096885.141602382	453858.9652271932	2510665.642884216	3618812.60216736	932751.370799638	924541.4790735072	919561.7086822472	516954.0019683438	2115406.462207144	1105589.7798930374
A0A0A0MQS1	2179312.0210758992	2648703.434242891	2189169.167191614	2333274.7585400133	2053670.1884964881	2440967.757893794	2133777.8908846485	2681136.387395269	1535213.7271266459	1900222.3765757317	1699028.1932400581	2357737.5030610017	2158832.7315717787	1633714.508475003	1842173.4474513675	2707896.53816907	4020571.7663456793	2222511.1375440084	1477887.7213736458	1975089.4853140388	2241110.6259616115	2526050.790917696	1841230.476474294	1949014.0960220082	2182711.7667307868	2581140.1964643053	2656033.74674082	2023936.855951516	2194383.9440671736	1899827.9613454782	2087486.8266595681	2201356.359030506	2165703.9175852933	2730595.024259333	1706796.9691156088	2127413.9230739786	2245921.910837024	2058291.8427210131	2374161.5599129214	2397717.637296366	2078088.191410652	2279866.5880167843	1835855.846783648	2415313.6123619718	2622267.493816118	2118378.358265448	2341120.74412936	2177732.6528515373	2025186.874767973
A0A0A0MQU6	14082555.937673515	7642624.24295131	8169291.482243514	6951703.0498044025	6978810.600085989	9307481.384043252	9552497.504581984	15091881.450453807	8814317.946537176	7164333.988481131	15358777.320096672	8062982.82305848	10763913.05107746	6921245.802932694	7729684.586285372	6587401.718898099	10702164.07962172	6457275.630668555	11589507.034076884	9582543.620858692	13245162.679001395	10678543.001833616	6841717.019085086	7700974.225801476	7765655.49509356	6133011.04261751	8942743.076779673	7679785.534136827	7740563.623385424	17027344.141141094	13386190.35207966	11297006.719803508	7431591.27071368	8808525.950026369	7657484.019578878	8211024.021668691	12771881.368240302	8343555.428330432	8396864.150563085	7451374.729853355	14583458.541283833	10168375.815363573	7268511.3514855085	10448983.14193374	9348469.099279243	8282283.861186038	8582814.154689096	9529768.098368548	8021446.247956968
A0A0A0MQV9	785458.48594135	731489.4160214334	815027.4227837691	664510.0138908526	811340.9059826364	895823.5826752622	863259.3509319228	869557.1504671912	974085.2622659764	829020.8261414022	677435.001188879	950712.969995925	672397.9426614527	765774.4877535928	950712.969995925	841544.6160893448	687153.8972503046	735965.7330604029	983067.8891524916	974808.3800395869	720250.3513819325	923557.253318293	803510.2697882105	833356.3792282784	1025336.9034807229	872730.527834203	760665.6433404176	775557.1482618891	707314.9339713324	817297.5317599967	740483.5936612003	812382.1265666834	944305.7885835712	739139.9521233024	858065.9388552171	760665.6379855466	885106.0392740183	795408.3691797673	820589.3084502119	883430.600540027	1036691.9733304031	803157.7522784317	904713.0006991972	780768.462278495	663037.2196472486	850935.8543835599	871325.4629799933	737311.1003487931	760271.727892588
A0A0A0MQW0																					199512.10354499766	243564.45137530856	215386.3991168697	194730.97297958212	243564.45137530856	313001.5407002244	182318.87540335575	257295.4815213047	154169.08598569775	261266.4106510045											212284.75938602863	138472.49535782912	164325.3729172161	275476.63377226674	127252.08102871956	349462.3276489204	96074.93078207217	319366.4521736714	280066.72798783146
A0A0A0MQX1	4499833.0576381115	4401544.325640498	4660567.039594471	3922666.78435556	4755923.2418115735	4326755.019367347	4671944.471393253	4518832.454367533	5174314.907155925	4773100.420704107	5642852.495888645	4612861.008149557	4642182.819510398	3920616.991838685	5020458.238259509	3806259.740968289	4444626.84214634	3296899.8635254838	5048664.902432132	5270054.417740498	4057181.8753049695	4793240.338100313	5043039.365063286	5514239.070790006	4300685.255697461	3619090.929599996	4616435.709728374	4254090.677212685	4374432.640793777	5133046.72943157	4445493.634913393	6107495.481516256	5070687.561040902	4257615.165297419	3486415.060495377	4274176.593804108	4678837.912976978	4368779.848151279	4086454.364079705	4929524.819005114	4366727.076065283	5291410.118004705	2826917.734276486	4540001.776855443	3963427.0204309137	5121368.433312325	4336972.814092238	5296161.580062103	5016937.362986979
A0A0A0MQY7	2145596.59234633	2148741.6676664497	2690087.7571419696	1953746.9978190584	2678162.6798865176	2536896.3800911633	3317734.713401561	2409258.740016325	3727962.612781312	2805538.2303513456	1759671.325309027	3427217.7556095975	1709159.9892415025	2369593.4433489633	2671335.853086803	2708758.015407008	2105708.548049044	1922129.667593607	4454896.708623176	3285263.401344498	1619788.6956911646	1814141.5385187115	2917418.2063140087	2477748.038514205	3499168.695473077	2652703.7482059347	2533519.5651730457	2814246.6046671933	2170691.257469304	3914307.6757920412	2012192.6444733825	4102192.468517399	2624087.6619411767	2478968.678267606	2174590.599953529	2457941.358079709	2971800.304468571	2302278.239935105	2105840.4052522318	3183841.020218405	2025253.6606996837	2870062.546985757	2050939.739429699	2701051.716453189	2657795.646369656	3068728.3121632207	3155017.4828968663	2792692.1535889218	2628140.71172476
A0A0A0MR25											3401888.728092624	6788391.95579203	6691680.467076292	7644256.424436253	5397163.603847937	7051564.988833905	6603618.721404588	7439423.147670096	3232703.434893046	6878478.109410211
A0A0A0MR27	1878868.2113611482	1711786.104373373	1871810.564968643	1349391.304827805	1354300.9718834602	1358136.649270691	1894364.348005561	1581296.3596597803	2095507.2701919447	1840971.7187753075	1529887.719581156	1834385.2856684208	1373309.2141655483	1548466.1646681763	2043786.4040221246	1433452.994023529	1573318.771083313	1519260.219213581	1816436.618380961	2264129.911643184	1233532.1674659785	1598786.4411673874	2066654.3373867862	1691241.429198057	1992576.2050017198	1510326.4217553276	1747444.930563861	1766917.5490305678	1354750.9295506335	1974199.3493561172	1286441.2482839557	1813588.600058719	1604584.6705286156	1887338.8018188032	1573157.5393756616	1832138.7118567382	1764421.79888533	1831508.368251951	1579911.2208555231	1763341.2098485522	1931607.611686702	1428037.0606420857	2339573.420702928	1593856.4328814894	1634345.8247759386	1546602.6136658182	1510946.7467617874	1619560.0028694498	1767277.1657575762
A0A0A0MR39	25648248.155545294	27022120.07871761	32099373.19929853	28478493.06816883	32691047.51301592	35949422.95898075	39493901.06099142	31219153.489630926	33436463.39708816	31525407.447787464	25301703.83453284	30337845.20853369	32984534.716096003	32726201.43316745	35817102.237670325	28887787.098198976	30561737.229511786	27152862.1186198	36836430.20892336	36957427.173451945	27768058.055117287	28783203.86249664	30184830.615109064	32473843.55901541	34709312.57752554	34276624.156931624	30750264.19518261	36822088.58909068	27975789.02987549	33819616.01246358	24708257.236649986	38519113.127593696	31687290.79785125	34076572.41940084	45423397.61558942	31935762.793095145	36223831.59649554	32832625.87246324	30009656.55331713	12147123.3855775	32300926.691224586	36227910.02621435	31935805.98125878	31007837.45433139	28160117.976164363	29934131.359533913	31272343.43484138	36842651.19830872	31839933.54084484
A0A0A0MR51	5301529.52137546	8937305.17978065	9119304.50176233	7250653.365528855	8572370.806655437	8131642.371419598	9407820.993335683	7808659.855717752	9952103.455817308	8914769.70246587	4426331.521198781	9568915.436133062	6053770.43837902	7448128.543968231	11703887.15494568	9062314.484426452	7331144.400112827	7567508.873347037	10237924.517759047	9996235.18780617	4716421.910734689	9636753.575122803	10205654.86993587	9011062.77453744	8316423.770007783	9853681.52112935	10621042.118691156	7429069.399452019	6614069.764655977	6991985.163441538	5629448.2718415465	10081760.569636237	9804894.498611188	9021634.193339547	8707383.31307482	8840050.834175378	8164818.062096323	7135157.87774496	6946777.280537212	9064238.310362693	5583473.441469317	8385999.592596139	6766449.304256517	9019395.943091938	8752181.502811048	8424614.39610494	10824751.58007978	8777485.556404462	8910593.055558322
A0A0A0MR66	22056714.011851795	24659599.73644976	26456957.15210921	21384999.958287444	23284358.58157597	25193141.446281146	24637659.70352212	21791439.06827208	28218871.44184828	27145804.37684161	23053998.89817955	25382867.55904916	23199453.495753445	20905052.85856194	28932565.4153856	24655848.86243419	21346460.86507743	20495979.14092545	29503668.89691202	27353647.89880949	18027220.27724393	21032745.556838963	21379308.804471992	22978244.86384493	24481278.65337165	26503191.34343764	24034881.464818995	27403916.850122023	32397308.581910435	26591450.58029205	15716285.35113839	22078573.73772839	22642640.366856053	21729313.354948834	29384471.35179227	24222238.939257637	34768796.90190952	25138989.533684514	25832932.43546161	23315303.66168757	20289196.07710537	23681612.39658933	24258803.16374667	25131059.95016267	25413704.6972994	25844800.83981654	27040966.829034336	23591023.497069336	26552670.77033107
A0A0A0MR85	1538266.4835732137	2467422.9242163408	2621575.7068104628	1917451.8895593176	2731265.521787521	3328308.5979560083	2082693.2362046381	2159008.6476158323	2573307.839764066	3025112.4691442973	1251701.6046600705	3035562.892431404	2313641.980081117	5725863.73095175	1370974.217558952	2144616.152148818	1553099.180027794	2477968.5669240723	1145087.5724456056	3425893.60541494	1260649.2748349514	3308204.197765138	2229150.54538892	1853039.7328606755	2757969.897509808	2004829.617372582	2522553.638205255	1471852.7844783403	5758415.927335525	1277749.8561291215	1939055.180046668	3376153.0111152623	1850827.3824642028	3103574.196746232	1815670.7744662287	2263568.7569686896	3091534.7745180377	1939606.0032858662	2866248.0696858973	2198178.169572424	917288.965749232	3607593.4624479725	1437212.2574372059	2048096.4486215424	1893473.0368045103	2057496.3649603415	2398113.0333362827	3442650.377311828	2706231.6217411617
A0A0A0MR88	1064046.260387758	1211745.1715595992	1242607.630610432	1164979.098406042	1518007.839181381	866353.3147840836	961460.076348894	1174631.4899357154	1315669.7785675046	1191117.7116837879	983147.8852008202	1287513.2815417822	1421727.790593024	989710.7973174228	1131410.5737016548	1103456.1156049909	1239858.2620284336	1125060.5127888338	1241159.0193848773	1187570.18131277	987958.8987658549	953611.2811383251	1338992.4832930854	1378203.984641359	1338060.1094169046	1294652.9256258172	1180333.528696307	1059901.9030229445	793812.7584706589	1385093.191615362	1060156.3661478243	1301609.6194737048	1064329.69665794	1115452.9954068572	1013388.9811188405	1057613.2428682223	997354.2627995055	1287694.170554038	1590821.4238247215	1222198.9648609096	785669.0940802081	1141898.7034148679	752088.9955384472	1247285.8534075485	1229136.8184254477	1330639.899578964	989166.2447732294	1294981.8680464986	1285732.874325427
A0A0A0MRA8	7857780.854645084	4565076.414012378	5927961.695613207	4765676.533357513	5739109.44939761	6339514.3939312715	6377605.411141007	8815619.081956243	5114379.0532795135	5768431.989873421	8368046.7528132815	5095348.294523687	7615833.585278134	6230413.302190822	5852294.600691666	5292431.916693799	5552790.129008088	5271862.336770663	6525396.736792332	5466739.533412687	6920630.130522149	9094432.648724563	4807540.506269655	6303801.54142021	4158568.4991135607	5681832.652794167	5782579.58195041	6523106.280201048	4809378.953881997	7189286.157008648	5874681.692029517	7138734.576245914	5696193.389251746	5740456.5742569575	6166738.959577418	5503987.486796684	7897987.767686659	5722611.731653505	5965461.09803345	5564301.06095919	8198555.256610127	7755709.384954613	7498695.211151803	5007762.909127775	5384272.771280857	5418803.84472048	5660672.81087433	5630836.751805883	5630836.751805883
A0A0A0MRB5	3626543.838429582	4313779.080889886	4104407.307961605	4498891.379677136	4411079.576560472	4780516.376815584	4278692.829576014	3513642.948708156	4216053.743352793	4613883.026615626	3831476.499534329	4373493.06442099	5255822.960438019	5079219.745147581	3420467.61465241	4667841.378492885	3432634.1215988616	4759106.675313272	3455479.3115674565	4081948.8530889233	4079235.8131219	4338783.890751792	4615842.895107734	4425528.410334218	4150463.5328652286	4151211.3304478363	4031065.1855089567	4100479.4961144635	5372364.782845281	3092516.9028717913	3983752.930277262	3797730.9989584177	5820858.851280257	4670986.169951792	3633410.3876336217	3893008.7120829714	2661384.4828317207	4447209.8874104265	6299484.43653255	3149664.1826978032	2895152.272149472	3522565.97563675	5616860.8522291435	4233232.651317533	4466250.481098265	5682166.172808467	3278206.436600672	3802036.5507718287	4593241.427813719
A0A0A0MRC5	356913.5260820817	551408.9856444722	487254.19955907436	495347.4767944957	441247.03127464064	417690.92532115954	484507.1544974361	516794.66146836226	502032.21251106	487378.7115165424											601016.4478706875	335343.5867424811	285327.51583966677	314125.49358806363	416460.9152426917	648296.501498327	503734.2826120457	417619.53480309737	851487.6619954986	367031.13375598623
A0A0A0MRE6	1171334.2485576335	971537.3352815215	899142.897117193	924328.0977911736	702961.4466961954	838276.2960144605	741718.8299205288	992548.6639159587	856542.9015389937	841219.7749357712	1733136.7891930656	840100.0413422296	1091923.1924948574	835810.712481089	573614.0780543555	685060.5765138447	764975.944728142	833209.7364695464	789525.5077844566	792248.1668842584	1417231.6681923894	1242339.5123546254	818201.3321661495	740142.1213685034	938624.9564188473	659859.7052000384	794919.4314772949	718941.3879295543	801465.5361802619	807888.1294737391	1353559.5048841962	974867.5664262177	883450.6935473285	817828.7787952871	837742.2571078839	967413.3232075984	604301.5722241403	822260.3673461366	850439.0450077297	827748.6563092957	1483353.1815905415	700620.6372509621	1712757.5839549932	782649.3846200242	666575.0480651407	708886.7133747302	792528.7593031594	659489.8399590539	620587.7231512201
A0A0A0MRI1	1580306.2906282288	2924994.332737748	3441436.3177277762	2905731.780131452	3352979.11501548	3737097.0758116436	3298752.601375903	2956559.0197816812	3285155.5054185167	3729974.7874530125	2948359.8227335718	3021802.9607885894	3130970.7021961613	3238476.834145475	2906653.425331288	3281246.661601044	3069025.9015922914	3213271.8802731535	3377553.5458016964	3025624.662542584	1970384.2158646416	2684347.438194994	3214548.697899143	2834682.5512763187	4222582.486353797	3483763.4015413565	3085212.5031216517	3418997.594900095	2865366.684961105	3433108.8680002717	1900751.6071459271	2764457.460724924	3050566.463978532	3295343.708192737	2800420.0955771925	3210199.7402722305	3935478.6085631168	3349190.4641607283	3362020.3771350505	3544555.048087917	2323921.22380844	3054095.343042519	3224254.9390268475	3230859.703733084	3208612.0752489218	3132657.281127214	3346790.7052872675	3011978.6704164287	3317156.1689079744
A0A0A0MRI7											1747153.3658120641	791754.7205831135	639009.9511098601	1183873.7515048136	1336947.3747979293	1037377.2046089469	654051.0984421403	1145115.9798781679	1142297.2328507754	1818718.2208964159											2351315.579757405	967967.5609853951	1154887.6027412135	992358.5598940492	1054925.25590126	903852.4149281363	1131979.855985764	1154060.986549083	1326594.4138173484	458352.8572958471
A0A0A0MRJ6	41624607.63912556	27357269.42015408	27589243.809324395	27380284.202071764	27657922.84107876	29711718.14173316	25137256.25009417	28191062.09077194	24091910.24283295	27441525.44081273	45688993.13681412	31334372.27000609	34396531.234654136	30379726.443556037	18487232.79060633	29258455.835849486	29620319.10894558	26932757.1361351	17089935.85489556	22994473.10617335	38401082.23076712	35610262.11179905	24320007.480806466	27625729.51772036	27325681.83061583	25473923.09220922	25992415.53896307	27410044.19244868	25039544.43221689	28984104.40243626	50036991.98422058	30001095.51895858	32420964.10257567	28050573.74432287	17948682.88600631	23452504.74249432	22179930.800701134	27673537.998476736	30023074.34351459	24395440.273596413	41050366.94497384	31888847.47596186	28084558.67000811	26962623.98087119	25787149.88641421	26908037.71567058	26399562.91654161	25615038.64447963	22578823.455321927
A0A0A0MRK6	14062745.711644487	9036454.056709496	10138388.10252542	9548293.30904442	8964736.167370534	9556379.312336102	9621521.048685258	10227725.94488724	10168751.192096084	10177900.884925434	13114231.924459873	10079116.754175853	8911883.062320579	8678743.895409828	11604824.98301593	9316954.6755415	9491040.122073803	8942332.636890717	11159922.865685588	10203836.981329296	13891856.830269964	10462257.53951792	10159834.380509326	9877648.18268128	7377943.5429456765	9282731.802137775	8965024.081144378	9800860.856065173	10970695.477252647	10714038.017410733	9881521.846809655	8303155.981048191	8818993.690495621	10715737.52553533	12863326.403591415	11039587.636401176	9471152.865610922	10406691.991166208	9881521.846809655	10121204.2391475	15291603.4306515	9027574.262002148	11912069.166878166	8935660.133300269	9341756.074044598	9068510.002984878	9024131.068835376	10975178.219084688	9196768.94844712
A0A0A0MRL7	237262.65746287518	287568.95456556085	259670.74658451817	273053.4822401264	265900.79826856236	312955.04493206955	292565.78487519745	476343.1745813587	201279.99824960512	284609.22326698265	216731.38499986468	468029.6718706375	480193.30579429906	351182.509062362	239246.83624861718	171314.0316643958	287737.03653838177	341371.160117938	173923.51280812305	161487.67492043934	292818.8526901832	428442.51950773975	308923.8475055856	340224.8538909954	241351.88467545324	239618.0832999775	308923.8475055856	259211.72214516	250277.5951545409	221421.58536901325	302035.57325543213	784887.650658918	88407.34029343065	330248.9667598094	182088.34601396523	306872.15499903966	37110.912586043465	231600.61245593274	229755.54608707502	398193.9836246368	430084.4251794003	289773.1942698087	311777.1567873506	300669.6639384781	229535.66828455887	348226.6151860687	244997.9122158045	133568.08110582872	246129.76381871212
A0A0A0MRM9	145653608.63205948	153551240.79435092	173794523.96655554	186341123.32489613	154264064.32762364	166959112.01543307	165103507.89707237	165103507.89707237	218208634.83270496	159412234.29014888	118885321.7327999	138572635.60258836	118389928.00075491	176266961.19473264	238504560.10566652	161397443.10866183	161846967.05070266	161397443.10866183	235577517.06592056	177552783.1481294	168192863.59334296	157015883.92008582	159251931.95332664	142277516.06777433	190645258.3054793	159774004.842145	169525932.38799724	154858639.34176087	186324287.5646627	200525241.46557003	147105313.7169818	135751808.2749336	153547547.51864246	148017721.46271464	219119357.46613932	174907856.00918707	213725066.36256272	182646901.78843898	146956866.21418518	166613116.9252954	112127472.53821592	164217872.42438132	161523541.39578655	179250427.30556968	183839979.64751044	175933401.09336033	183839979.64751044	163239573.6580463	209366977.9416024
A0A0A0MRN1																																									683703.8244934019	454398.1186814396	361062.4880032913	656389.6725327041	419770.9142092727	363640.89861368923	275000.24198106764	368401.04127903905	303374.0923684565
A0A0A0MRP2	1238853.8673277223	965850.1776752105	1174962.6770391106	959771.5334306598	1461253.7358132722	1003904.1560280812	1305540.5202336914	1203595.3515922087	788058.7552113128	1080690.161113352	1092911.3007312154	1478515.0862714627	1408936.90870475	996637.4764732549	718875.6287571755	907821.4836718969	1776235.1079424273	1254271.6540649806	625373.0668700206	922906.64275457	1008911.7000816624	1124819.762496808	1332336.9265071999	1283234.178811585	1095506.196189145	1015036.9228922188	1052225.775670597	1234656.4502140179	940490.941983523	1095270.6106964312	893893.0584014669	1018146.2124559244	888922.4599734049	984025.0023440486	803737.5011646901	899784.5753031368	1839357.5513249664	1072474.4990752314	1527071.7355951676	1255074.332088642	1316846.7871841076	1150101.9273802286	998383.083538359	1051303.519713534	918092.712234055	1014773.6750626796	1310196.4419149095	1184796.653171423	1034771.7652000088
A0A0A0MRR7	17551694.45736157	29852592.75302692	21071565.180855907	23958218.34460325	22870871.153128814	27358430.040597957	23589612.730337165	20975556.14817033	25080460.32982787	24659989.11653761	17124055.055295765	25577187.878502004	24033075.55598129	17414280.53285204	26304503.45157069	27150119.74131995	22527760.21439815	20457287.146234836	29231855.96402677	27148864.10259581	14238245.257459685	19039197.04785393	18283114.70158912	22033190.66945675	27388993.88541476	33470711.471772384	27058662.06517673	25475749.26872749	22525484.122897904	27455642.84526525	19961605.023492854	19793769.43880134	24996908.96824113	21888759.19740961	25538386.708107106	20148262.86974478	37071524.84724831	21026447.45367295	24838056.735657994	21705264.661862515	18982628.666096844	21664908.31957131	24259628.32049685	23548281.97849393	21179342.367388897	26852797.177099176	23384667.3641716	24923083.63708784	22539680.382963214
A0A0A0MRS6	793596.2676823095	386429.1142485923	444867.0515344369	340268.92155493604	375781.5239804087	451676.5569385078	317653.10966747627	553076.2828645816	458816.22018035187	391154.49830172025											486757.06785373116	404520.2198038728	256186.6866978493	231210.7887944311	280125.17148937425	556351.1820798328	538580.4608920472	472341.9881668307	501668.40438231186	785574.5803797257	878680.0278179826	523847.4240840857	436630.74136775604	457784.960300835	548244.5601498553	490610.9442726698	129408.8134279396	344159.7119047885	261225.86911475495	442733.4461828616
A0A0A0MRT6	14718094.35840558	12766704.170025585	13187404.01166605	13341006.387924232	13428474.407737922	12970571.85723109	13672744.853315167	14010264.741479155	10530200.237548023	13543676.189931557	14939693.189982373	10916628.723130424	15898353.29309668	13433888.215766056	13060831.114891235	13037967.897667585	12538295.668048317	15001449.200267915	10477932.002167232	12864103.127905965	15972126.42781915	15834459.133730223	13812391.814130465	13679290.760565305	11644884.876146005	12082651.326700205	11084305.98631318	12409390.124689247	12051960.36113726	13597681.355459658	14804356.657549633	9237947.557501813	11652085.830190854	14889674.826521516	12963752.440572312	15424117.917996142	11360468.98903359	13954416.263089875	14142424.865436895	13739899.795543842	11160740.00104472	9781224.51043593	10359672.764344318	14883694.928190913	15504816.334234655	15637493.998066535	13078188.1739978	12291889.9825467	14665526.519547988
A0A0A0MRV1																					1461944.5259249709	1039705.9849156605	1014465.6328896512	848069.6868690382	1070166.361083302	1499559.4057690843	1858697.0667133718	1009386.856460087	3393322.752304478	760066.2210459937
A0A0A0MRV3	3074934.2999402033	1779230.1886787354	2855221.2249615286	1436262.798010951	2102428.6463472457	2349461.652606084	2262100.797495232	2880391.2192311618	2605723.6567637883	2911853.712068204	2417112.5279694563	3014362.269462585	2931220.2237119456	2206042.878403284	2179890.727708456	3318381.021289958	1527067.665988818	2175074.3732888256	2175967.905104232	2312503.925190145	1763756.049014714	2577894.2166941096	3146774.6262363093	3063370.1899930784	2579574.064352583	2892445.690743354	2653151.391793742	2591165.013196054	1697066.0969732988	1292428.6766116251	2124477.8035845337	3193400.8617316163	2448045.16701993	2625789.5301956804	2329880.121839263	3135411.2890317324	1268436.092694596	2172892.7739383318	2265929.004282382	2693353.705241651	1484050.4403390188	1368743.5441669896	3873831.5224906066	2586555.92240672	2790738.804932381	2317937.436752359	2553414.680670143	2007251.121029897	2622775.29805072
A0A0A0MRX1	5221886.116090545	3759093.219349686	3508193.6592676532	3738786.9745889287	4090444.75354974	2512979.54927998	2679532.3796603032	4725557.492318834	3828931.24122819	3752136.175024624	6034256.935216366	2108773.577169328	5054374.2577172695	3672975.86815652	5025283.090631024	2292710.401934444	3497180.729757457	3103057.822532904	2888762.4927094667	4140162.7296801936	4921814.605383412	4319306.824652758	3445081.0290498417	2971733.0427667946	2698432.6720666885	3348402.527872668	2624302.741436263	4379427.746350822	2624044.7486382453	6484992.968572788	5753403.559742207	1653401.8944654285	4997994.566652365	2978409.1766347243	5078908.860824348	4122859.331246309	3995390.9762629936	3721006.8166206735	3567270.5793739865	1948892.5279263884	5147991.43351803	3563028.263799885	3418062.120228104	3481582.8976678182	3557493.9437888823	4033571.845475646	3655872.6771187917	2860334.825984986	4265226.090867529
A0A0A0MRX4	385562.42644788034	238558.5801912941	253612.33543107184	214361.46473512534	305582.0420607373	356816.6041503914	286902.6876122673	291768.00784070604	312732.9934953931	285883.5099545243	340073.77798396326	330727.18203869346	239703.64580626128	319284.3330933529	189158.94732198532	303970.1471854961	357093.81381022616	272339.80489910673	156740.10620070685	422673.8388583128	286027.3522475551	286563.55299537897	260236.09627722317	289351.7968840636	358065.92271770263	283828.92918147694	285169.43105103675	243989.2136181575	318512.180886556	320031.41633872385	438795.3979856379	459709.44234419	305289.72760569665	285328.41708272893	250476.7987100647	254610.43422251922	124585.31567741408	311328.83078931965	186228.73150719472	315416.36627747165	218622.96186972238	320370.6410632492	251263.67553809608	313592.31104120717	323614.3483484753	263467.5787322875	181458.51292912755	201008.03127596094	348676.7145029351
A0A0A0MS21	984943.0826675723	1045621.573326597	1020936.6069456093	1272115.8329217841	888141.8270688306	907527.9263209151	981130.4831479959	632904.4443158861	681615.2497032905	1044393.7870406315	792372.2718581698	633160.6230977195	1176011.2103614395	811062.7558574558	1421370.352901865	881952.5597113208	843975.8790753217	866985.2796959564	1173181.575333659	859315.4794890782	251764.89844321343	426151.8404005381	1262726.311641766	809810.4286180757	1595112.5539684806	948946.8707013528	1030702.1808554473	869357.0703285207	1363198.1618535095	901612.9237933444	6068181.989873652	576631.6793356297	897554.4282170269	643920.1173872341	114235.95439009467	298085.850689887	56765.77432857265	335139.52212174557	234560.6761430807	234303.35898035948	4226344.7174455365	745581.7676065038	1780317.63774557	299546.3785537277	368020.1338516342	289757.8791323836	556041.6559141424	569169.2228951036	315363.4958429836
A0A0A0MS24	1434141.1876975803	1602388.8281444008	1738283.3183122445	1881633.175830443	1750768.5890801242	1900168.0326852216	1863363.86133748	1780302.210561335	1689083.0984301928	1774513.3870737394	1406628.1972773424	2190094.107978532	1832570.0904338988	1656199.9994765115	1568511.3897707276	2280264.8965488644	1455730.2082705968	2188153.4954117024	1239961.1691541001	1596492.3151529129	2040969.5238064504	1917351.7976742615	1904964.4842085363	1563866.3989822168	1619800.8659717818	1616580.164470693	1797884.4600744038	1454896.3517625926	2673361.03187112	824969.5359648148	2150259.443835493	1649686.1158674192	1739967.236205199	1744175.9009840712	1787156.8900383024	1599503.0492103426	1313419.0608665114	1719765.6452666132	1700037.52911565	2010674.867779421	2019093.3519760747	2148437.6722323247	1278214.788103475	1332972.2783923184	1680374.533349111	2044625.246856316	1787556.6504352018	1691663.0005778878	2136449.345956069
A0A0A0MS90											60777.84476754383	55253.285153971774	39233.21562735054	28831.89618788	62480.96231021077	19731.17418561991	60666.354002899716	30612.672814885267	37229.07302014448	26619.38118606322	53607.91215146465	52913.6836841734	51214.727941435325	31319.37034716464	35484.741150912116	37409.247914668864	20251.259530033924	36600.77931984868	45909.88509643765	56733.404871294864	23127.233898976534	49107.21699475551	28802.78418526641	37726.55226495452	58801.95686275847	40499.055892156466	58099.32819113687	42495.5963798244	34467.583868930386	48343.15630812875	44780.322673373084	71375.6788884164	38748.39800081511	38560.86517687208	29900.05049062484	26093.362863147016	44727.722003242714	55128.932775107634	44161.69305292684
A0A0A0MS92											306019.594763237	79605.18969132003	148323.39325988785	172392.21764955128	165031.2376475778	125179.11361895029	180828.68848167534	123775.78676820561	202902.19435750684	121249.79843686512
A0A0A0MS93																																									371621.82604406576	365378.49325159047	212700.30149721136	558168.3041364766	425336.0167931212	329698.20515482314	479803.71322402713	451780.47810377844	575893.6282714354
A0A0A0MSA9	510923.0508186292	276390.5546298171	337460.091714446	274827.3906216468	314736.31863271096	383592.7282765587	371811.10325201583	430342.91111350415	342670.6384083471	379877.80146701814	522093.33884743275	362020.40181698115	434752.5712638271	311183.8617287774	339313.1836729635	168226.81414650104	339175.04090098466	227970.1094580389	366406.4348273086	551483.2135859254	360152.46775213315	670324.0674667732	296750.2607945444	308269.8306573277	359389.7791197734	245595.64466699137	306432.44440664287	418641.77131166466	185912.78292305284	471168.23647274775	437105.3387686209	652892.40976895	295567.0418371473	294179.21428445843	406653.5863806359	326089.1912749065	410515.3673968137	300384.2113859732	253107.5641019845	246138.2561743512	247134.09909361927	364712.9329390093	300722.07318077475	396650.08334658	350172.2047881173	529857.5288117332	375125.53185534617	281023.6117980031	329143.0288050301
A0A0A0MSB8	26671084.580489267	22965496.26774162	25375209.607701674	20981725.061407376	23251377.73623631	24346836.53692727	22743906.8517121	23766872.636957485	22642943.098812185	23788933.73739783	26789352.29505312	26322692.733444083	28640900.49907667	21909798.45541525	19511424.83946583	23498072.575721826	20260268.194190107	23219802.762357347	21985248.667478148	24396826.07053857	24414861.93606061	24629086.704300266	25890729.78795455	24512945.53770914	27287136.39922665	22691279.29460176	21490491.000291456	24157362.65095412	18864833.5540198	22595661.70402468	23093183.240242437	28954480.06759364	24115678.960923456	24147252.46298724	20849035.862785745	20900848.78924939	24445500.62094361	22350801.1532555	23260765.67427329	24416841.595993403	23318574.27412251	23403249.51898792	22639979.706116624	23400693.92809661	23066763.384965416	23508028.74553164	23304433.337857265	24218483.01331586	25502551.58274547
A0A0A0MSG0	511896.3108014402	611565.569252282	244263.2807755405	495664.5177500692	536334.73710984	432552.08017144585	226861.9920757476	412106.0700421411	377787.42187638493	416279.9596839223											668746.6086289594	427888.3344028017	390897.57744419336	436183.10620893474	359980.70071224286	462399.95657501905	531505.8387456669	272932.08052509057	441172.3649665465	273796.67878184444											508261.40690702724	353783.763567116	440283.6837570418	386159.10797744273	381854.0621801777	458168.8740204764	390009.1489343464	296740.1567347371	512748.45464043686
A0A0A0MSI2	1599366.8046349997	375817.1055287282	692569.011583584	555740.1887900829	713267.5909784812	1044808.5259421364	388818.116598144	1572516.2316571388	792425.2621050872	428851.53296806966	786325.672187082	873223.4336562806	995248.2706900644	686124.3446297648	404135.9193279251	858221.5399824452	511432.4821322387	1000173.4206886444	1489669.1715053688	559881.99409145	1095420.586658508	538462.5376578291	692360.8907525421	626359.0291685343	1075426.0653829176	1020144.396045177	945920.6921028036	952053.0054640158	660427.4367308232	557904.2422400421	791558.1847845837	1569531.2748646266	496603.13692449295	1396706.2283983587	778176.866500611	491961.5629004416	577275.9576449584	474685.850801167	586332.6874479858	1001629.0325658013	505286.246068002	829471.9428088409	793528.9834732251	1371771.3946780458	644869.893484439	762102.0930386421	682050.1319710226	1204058.205764355	660088.4270413434
A0A0A0MSJ9	4996397.73210963	6984105.103187132	7078991.006911823	6493660.608732763	7460732.438877192	7389836.678059648	7020086.277442948	6887417.3126762165	6685242.383178173	8449475.391715111	5603976.000301525	7128940.518961743	8421328.25076946	7035143.3824100485	5917206.147793359	6566945.609924258	6537649.673422049	6571100.045907456	7916349.394191042	7747306.826598833	6314891.363012297	7757609.97879696	6649615.988665416	7996035.007729027	6929970.978991454	7169641.208188383	6461109.928767214	7187517.845654204	6031195.290787475	6948353.093792515	4953717.051147443	6330477.0200487785	7784960.326868392	7268815.633364176	6549328.543067252	6984531.535166103	8416006.489244565	6966854.386108879	6964609.66876828	7226643.006327652	5045880.338633357	7609596.928995008	7776811.296153545	6893557.33164999	7225412.495310111	7529387.310186543	6077916.034844533	7396983.872440514	6549398.694235121
A0A0A0MSK2	2108350.526830296	786187.5008485962	882958.8844657566	670559.5625398338	643483.4840083022	879261.5208007364	981578.9499154269	1182871.9602168084	842856.7093297695	794790.9816845084	1669178.1226374074	715129.4598769541	736667.5422241233	914647.4624406864	1121794.5049718823	905390.2736996786	844264.9168871945	906041.5332090963	951685.5211119951	1008103.2020421176	2101797.3882789523	937467.2791397137	1003451.3706238334	896907.4703279549	744480.8177578095	817811.5915927383	770466.305331968	892996.0422245149	598286.9408394505	1009233.4817332664	1708836.5142785714	1325462.9435576447	863796.2799064314	870216.2063493119	975678.7709535587	886957.3167062056	582048.3227604514	1089351.1246316729	666053.9712734682	804495.0227971531	1318078.2397331945	1052888.4918214837	859130.7857086912	952825.5862327028	855835.7608360356	917809.5447103359	954481.6350028977	1095262.85313719	871542.6151512854
A0A0A0MSQ9	1696768.0209630646	3027755.9465975687	1740900.726064441	2736958.280252384	2104721.5816631443	1966890.7270402915	1682455.6086991874	1653266.2574696094	1861144.9135528402	1970198.189363916	1759135.875974597	1878572.6319718752	1787855.126608767	2430342.052527195	2112794.8029183927	2149887.775833141	2158595.138610837	1644520.5522591826	2331623.7172038155	2187700.365506377	1108973.6058806921	1008941.9147675936	2161389.209191109	1297420.7598048176	3359163.650385741	1848136.4175380932	2174969.0021508774	2272871.968962174	3137023.9290641383	2072111.2460164216	1667711.0565491754	2676164.5756979384	1673784.427226896	2130588.6646297514	2768406.746893397	2078987.8460897172	958108.4727413412	1907106.8894661008	2011815.4531053018	2568396.4944992843	1371712.6276435815	2090193.6021545462	3402749.0330502014	1828765.560354157	2396645.932048451	1880230.680548521	2096844.6843478591	2085295.287805238	1687149.302952047
A0A0A0MSS3	1110598.3738231258	169230.86398421106	278466.0873840235	128631.11998090953	203082.03572347105	488846.579037495	187102.08312787648	364839.48079305846	278616.0556565578	259161.83808058628											380855.25268185337	254186.33509670483	378927.945706156	344563.6986866443	445474.5827915594	347339.5055887495	276623.0974364283	434613.7837335409	320078.4150960223	285908.1109168325	300066.94964716514	220853.20513465206	444806.52045873745	306995.61121808423	376892.0846694592	316838.03755721386	579805.3078882105	366084.0502385388	318328.800926996	237895.3409301157
A0A0A0MSU1	4041756.3190361257	2143564.28860528	2382535.5313490774	2333461.079714191	2324732.422308776	2925264.051801305	2498529.68975881	3615991.8078164537	2917466.451185802	2552841.335836946	4126988.8494966663	2507597.356168974	3594310.4023886593	1772910.7171573732	2709780.5984988287	2216488.497299236	2611682.339622941	1814222.6177546424	3290948.013680748	3091215.477318528	3360997.024688968	4446351.550802572	2975657.3963234443	2525906.8920707917	1861237.9314770063	1931575.8586423702	1823390.601084377	2486259.8092431803	1970472.5234984811	4354300.279631839	3093727.8225474986	2083568.8740074441	3269493.746689992	2415939.7609845	2801857.365415107	2474091.050535305	3420999.022148026	2810026.7675231383	2957462.1953855366	2408983.3913106914	6195417.867375948	2544722.5964494133	2284337.665892257	2359661.050461969	2054981.6237120237	2295101.7590914173	2454036.3746377067	2990699.697306648	2403450.190166535
A0A0A0MSU2	892489.0168637723	1016000.934905308	896736.8629695029	965033.4016564451	914766.4871808651	853761.9004193189	950965.8593582462	928623.2921787541	924651.280235733	908432.2314683978	575503.2200622925	945550.71600312	992217.2881287369	933454.2492810852	937875.2929561436	1052822.4285076626	935664.7711186144	786454.5470853925	1099703.9124785946	992217.2881287369	1090092.0653611831	1140559.588817353	1021427.8917756352	1075212.6806536205	1144070.0930016043	857722.453532042	663131.0197591147	951765.3179175016	558298.9911376521	749154.4755034854	1527040.0000340762	689192.213631554	908151.8621161531	938902.1713156834	763269.1996228576	890123.3120417241	967969.573522379	929124.5907309628	819717.4622550925	817972.763860793	777940.3018968472	982306.3660744677	1026994.7222822319	1047791.9062748093	932081.3993630866	924800.05865875	997148.2043152556	988494.3425196862	798179.1722251944
A0A0A0MSV9	1810272.8996716447	2341491.963485515	2746695.8710572408	1703703.185642727	1680998.7307680643	1877951.7292741071	2384586.974245222	1414085.5937965554	2328781.81410592	1942534.4968482063	1690152.7124824813	2197844.679639972	1870557.2068606291	2095844.7480565119	1604152.7701670153	1711998.8516753188	1401322.1369850652	1654460.428730803	3767997.4726125	2236767.730455379	1757376.4914437456	2312192.21925144	1398529.306093072	1697710.5762634715	1802121.9847999285	2677237.846226709	2483950.56350552	1591879.6772786342	3253156.6653669975	1256943.019925131	1646526.5422782602	1843612.5345475874	1950092.0866228996	1973484.8536464053	2285620.0255145067	2257054.600436298	2809300.699011119	2177997.8564360677	1774684.9358723855	1512732.2675200559	2530836.779895964	2607700.3592905505	2541451.792631052	1614135.16728631	1749952.8943326932	1873342.346724984	1786370.553408457	2148533.0135445627	1742821.7832132238
A0A0A0MSY4											665903.586101479	1222848.4782523178	1093346.080232667	655434.3791788457	892805.3203385216	1838501.7506955191	1070509.3003206386	1023426.0627242344	1052277.4677982784	1426283.776505683
A0A0A0MT18											974318.302933575	683956.1280421015	696747.6275389956	681329.7365104199	652293.5190212724	810453.3579527362	655284.6871545765	711581.8760049755	768122.2492564556	659078.3638114502	1113906.6726632777	598195.4094843421	481102.30984291295	777928.5062530936	694332.2673268167	884626.3004029825	677232.8573832212	625177.458108438	777194.9983542216	663414.5150302787	458856.1029384188	687224.1574385244	696338.6892000695	724403.3708582448	921908.92857084	757284.9094916671	907270.8751879791	687224.1574385244	696324.2674725987	756347.497206065	1365415.5028114358	546906.295563851	881064.8086626319	519828.2371109528	587024.1131849561	704000.1509483983	601179.887777469	752458.715424843	622090.4925697289
A0A0A0MT23	9743802.58810008	8851568.430954674	10153808.70399218	8923065.963884974	8524650.12688735	9132415.376416452	8657213.941742923	9816966.223621463	9033173.6133825	10023570.188839812	8746256.668998735	9836402.87181005	10640708.78713388	9430448.846495377	7700963.064489977	10889298.611624328	9306534.04101543	9804473.903526872	7244986.988864993	9260161.015651768	7396078.91963688	7765184.68321599	11315209.47365466	9236487.733245704	12241464.794616107	10086296.735657047	9828769.829133656	9180353.86806583	9404982.41977236	6405404.635649772	7787611.829933247	11285552.721512916	8197415.544622969	10232309.71511563	8249930.673217397	10073000.06862711	9126283.329958206	8963682.460282728	9126283.329958206	9818162.411204243	6296271.49037469	7689174.587896148	8441734.965140998	9934739.362930862	10486706.723700788	9996667.408285538	10539884.066994477	9108807.714559283	9867426.270154042
A0A0A0MT24																															16584239.923885236	6187037.353986218	3931395.662130532	2257445.264214895	2166521.6924538426	3931395.662130532		2705476.1630995627	2011924.1747937181	5506384.828858203
A0A0A0MT33	13187719.36482837	14835497.384161353	17490468.923648793	14306942.164546888	16097825.661954315	16768241.302025955	15809719.643328685	15723994.364762148	18033709.69991293	16810614.86760458	11085725.813326422	15770411.0502874	14802509.767623527	15245707.106252896	17536746.074630655	17162725.915817223	14338294.48201659	15127956.95448486	22075629.647912588	15919026.139939815	12018613.651271435	13928270.231884835	17157814.234506022	14902279.909171607	17688315.373812407	18114363.71311041	17436835.645571362	15821448.528877284	15633322.28080697	16363470.98290852	10885506.145278445	16314538.859287195	16929653.758903492	16705749.447617475	16015377.821152275	14965492.993357845	18845901.48965961	15048235.587680748	16281575.16901453	17072703.735558446	15540899.638645574	17409659.407125574	17874017.393042274	13819042.656564282	13788922.138558876	12480248.382303093	15935009.046444165	20197438.850684404	19487975.1494987
A0A0A0MT60	4035889.768116023	3856657.418629405	4320547.815681526	4118359.1720364	4293606.655367201	4261121.333444783	4631020.865734711	4051136.2125382777	4609363.9844531	4381360.3383202925	3496272.569314384	4125858.0355329937	4178253.111292268	3739503.660593975	4541555.008526592	4179202.0518622925	4378411.790098393	4248406.932004878	4891585.294074413	4780016.995627111	3834977.4022029196	3928948.18953387	4600297.179792495	4185067.870388684	5354938.458821737	4266799.455523559	4200172.195890795	3827009.5994309764	3115164.456939693	5245689.204319845	3377945.8865675493	3711925.9817513917	4470925.416339243	4053930.6409819536	4350952.532739361	4382768.233854167	4605421.630643397	4399834.560207048	4282235.139212534	4923126.553676148	4933401.199301478	3861485.1617215895	4199965.3216676125	4273980.645139822	4045217.3176349583	4020213.8218065305	3966226.174097389	4103807.598904556	4576261.714110361
A0A0A0MT83	26475149.665151354	34758092.521217585	36091235.34612672	37748470.48554848	38068723.8013231	35994442.06478802	37705029.184039615	36687694.51847164	46499367.08251946	42176351.42469233	27789401.90354886	39131036.93528028	25654452.42072521	37103753.70440468	45020112.53700611	41690751.90524148	33206564.20962631	39057728.13763677	46606213.17203705	36944539.18181812	34701589.813823506	41434470.04759247	36101462.76109753	33388407.260756664	37682899.00848402	38563082.94589286	38716549.27002569	38844815.66961794	33732957.34793722	39038321.01383039	28122194.59677093	38088614.12507466	36365510.92564377	34509630.27734636	48946862.32092476	42048965.53303755	39268090.63545987	32564854.56712159	35924321.82385319	36365510.92564377	29230739.23079557	38931330.39465815	36471630.03694236	39983345.4534764	40512693.82708786	45710071.08614907	38340123.01081631	35052930.630674586	31172059.55728107
A0A0A0MTB0	2088958.8734119716	557711.884080319	1231469.5482150652	437854.8406065988	331076.5430646517	386088.1754374706	616723.5452776322	922523.5017030081	859826.4206898691	463284.23733579897	1243406.5035149236	780985.8455774152	1016683.4694985307	750459.1383102556	678400.3872504372	804699.7254716464	662023.3983732057	907809.2474426958	614320.505171606	436767.7425602129											1767480.893339831	852333.2658597432	554302.9510144072	538492.6544457532	734422.9551171381	787420.3496892293	736681.5689126601	725957.5994740793	569099.5390291655	629352.9527238784	1356199.5981173704	921435.8980913808	669387.7088484054	742278.5864174756	713155.1286353121	813414.8495725759	708258.1005183874	684623.0100974565	712027.8882008501
A0A0A0MTB8	46075338.59469142	44097715.9911543	46133633.85678765	45561368.70054302	41578654.0593598	40433715.68003589	39813014.22708168	42736230.14489694	48584684.64946988	40578801.98825483	40869013.86887523	42977353.91539114	34651516.064082034	39186251.73474448	55688298.45403294	41875062.00804723	38101133.324783735	42332219.90686381	51158826.11444239	48753483.81458346	47917947.93394312	44381151.80208397	42212951.61528565	42556849.79866002	37723345.701783575	47781198.92086348	43792054.38486224	41145338.20728314	46328591.25027837	41753727.05699033	51869647.89052189	39109817.70104009	44308879.71916645	39022295.35998249	48535765.86220767	45337620.45933197	44710366.43133337	42167257.40669223	42152175.55942129	38379332.39737903	43297238.24972119	42652990.50333585	43906932.9162831	40427103.39341968	42195998.15728395	44550957.739572816	45364270.36168781	44020623.695057	47483733.98574778
A0A0A0MTH0	16019772.527801275	8723360.772028863	14154794.608081453	6030682.853445613	6645526.235674605	7826913.950037767	8439994.593212204	6675704.328288596	8399334.079020454	7142031.069374431	15491269.950229999	6161682.16819684	8864666.05132156	7593852.59735896	11042940.558877736	7028728.060007075	9142239.168755034	7840452.070693329	8479413.545606071	8412873.66598488	18328551.223996986	9936230.305046473	9752912.556391146	7401803.3297917815	8411018.039856736	7705035.170833923	7700419.990702184	10228614.592321467	4962151.415682456	5631379.3984640315	11251867.104059512	8919328.037606206	5819399.5099260975	6876958.479041237	11690452.72373106	13352505.995851552	7689197.66947918	10099435.06602648	7277192.283025152	7081784.014021241	15841666.919724565	6932434.930597444	6751855.773781189	8385431.388002579	8796548.834599486	8826216.196377466	10519258.584726524	7823336.121081538	10310728.723564548
A0A0A0MTH3	17377884.263753787	17766540.811823767	13779285.07623088	14859974.906633787	13983001.31261735	12880778.002735775	14754191.37036474	12526860.245588722	11512774.863947807	12505311.747459842	19201003.1240323	13433620.7462364	14066562.276516913	16767494.836651055	12464936.821684554	12645485.689307673	13710724.008284053	15843555.631466676	11769431.183797253	12043786.963076726	20383893.27817891	15875599.715620374	15966156.65123158	14638639.728905033	13305591.48606879	12261093.796488253	13896889.648555076	12675942.834715296	11519896.848189265	11422895.924184265	20044893.696949333	15843679.158398753	12812915.628961265	15212413.81091411	11731852.163221592	13693120.026650084	8512007.689095393	15145404.701928768	14451652.203535326	14498659.535168167	16964426.155620907	15322019.878947426	15036384.004743338	15578879.004630947	13246896.568964768	11722794.702875812	14510835.31231784	13677481.991272418	13656080.616817124
A0A0A0MTH9	31075508.10723558	31853896.92120681	31594345.92209289	28924261.39396126	29628241.358198427	29235783.98117249	25483005.75533121	30585715.192421198	28883030.463300943	30191936.89854265	30394487.62181714	36015404.400716536	30001349.353110146	30495198.90926081	23395799.596606653	32541235.621896613	28957051.26410269	32109391.24481105	26219565.10394086	27326244.122248296	29285151.56573342	34841106.12220268	34900101.34445351	30256845.64225804	31136291.148673885	31803140.02472019	28464063.90288936	26947260.27801844	26242182.388297044	23579584.35804021	29302618.46143305	31225968.66546113	33399227.13133411	28159768.35881467	26061945.95744789	29719698.18005529	26066153.66434372	29197056.69194105	31870057.862084623	32453231.273963504	27927206.70950351	29342865.495237056	28945571.36615047	29842323.585494246	30881545.49782431	31295031.443822786	33552737.892327745	27458394.14842984	29293466.73177706
A0A0A0MTI2	165215.46329284445	147307.8061754468	203525.13818551152	133015.53480031673	110585.45170142542	147307.8061754468	181305.8461281305	168552.98811675748	132948.46492347255	148214.84641467294	117175.00145680732	161303.44608416696	167924.3197864511	208694.1173172637	136676.04572312225	169659.88862103038	155164.67483593267	192607.96543380155	107436.53188500108	121361.25776613988	107961.3272922835	141928.21800823082	252082.42114816012	168333.46787022724	148911.39333685447	167399.60522476432	156590.23962404154	149625.9683975528	142412.16302288367	102762.6992051923	98094.9676707889	143333.3444149776	137262.40052634472	170002.83683817743	135600.27453737572	152034.48372346954	194499.91582663407	198060.442377535	138939.29367612384	170166.91640273508	86478.73730117214	120815.8119985755	125619.3816750488	145444.3654704635	173606.80135760622	151937.63302308318	192961.08360180867	151660.03980057346	199896.08645633524
A0A0A0MTJ5	12520325.032637658	9516579.793757977	13061266.227384072	10176725.845720248	11346471.19496302	11379926.029336747	10604889.033012072	13269361.166457845	11964519.91367169	9621591.290759053	10351079.924854623	9553250.23507868	10465124.92308902	11605251.373523092	14561038.90223072	10712594.48095991	10226601.022526443	11287866.569926092	13866998.249145824	10831848.342943452	11294733.752222588	8933211.84209397	13722098.55483123	12939065.901729835	8830312.93124832	14853433.499232393	10712791.039338304	10648850.18493238	8063427.367329182	13463731.638283415	10644081.011012584	11156870.983804682	10504793.71066832	10999372.57740098	14078889.80540629	12816644.512507794	12055886.564827867	9652337.819836406	10106768.705696553	11446013.219503526	10921361.541305857	9363209.17481065	11581453.0727137	10507648.122894824	12130548.32113322	10843159.61465499	15050002.828005705	9686107.452594867	12387857.886242522
A0A0A0MTL5	4784838.085721502	4373429.80956113	4876031.032512771	4614932.379334887	4094267.7275470393	4188088.08216903	5774276.08464046	4382625.736968651	5991803.55795889	4530089.001467858	4131039.6506607085	6770043.727800262	4009355.062843464	4652047.423973721	4305889.755952656	5613157.9302747585	4420192.652461438	5405381.496576811	4251172.7599832835	4052096.7743142713	4018877.0883328686	4040092.201483368	6150583.652105179	4450181.088333137	5839171.279177672	4959763.608304253	4830298.94254132	4915659.4121210985	3954032.3078551996	4451725.368654339	4591982.143154514	5895653.520830419	4716914.982527839	5052123.422998867	4452669.888786053	6422462.997470402	3355959.376933	3492517.13297447	4091877.29436264	5538222.34809418	3477249.5536845974	5004938.236277646	3633071.154342389	5182261.2120598005	5177191.692553288	4471536.618635867	6814977.1139942985	4233820.2365587335	5032159.351888705
A0A0A0MTL6	1719917.825452311	905729.0836341556	743893.9973922509	1199942.6689202168	803240.7554079527	898547.8549244931	740235.6355967625	653383.41667424	726875.8402991641	965102.9406261202	2102550.1495058304	1152245.34566177	861763.0665870893	978091.6743660144	464944.3507091923	475553.32236241346	746328.8197905581	502723.39220685477	1254603.4180950287	818062.7385853034	1271568.947106666	1157084.1708606095	620805.9616930638	836615.5048099463	905989.9396409087	660087.7026037435	1038137.9322767969	835206.6219664444	1242530.306276707	788843.9402460153	572492.0612767347	833374.0461043586	1082967.3286378041	916861.0690354594	901974.0461292864	833598.4735853561	1678567.9395412563	826716.0308347638	953367.9392777331	756970.7025651446	708365.7249861836	873581.7289330444	895344.9803157302	920641.748528077	972841.428966253	891249.3130813502	1057244.29687475	1113459.3373466318	950435.7199781744
A0A0A0MTM4											731677.7420837375	708888.998944912	596825.4062114679	931507.9539048792	1354597.6021341323	736243.7549882528	586495.0602736505	1035699.8230337064	732628.1339100167	538954.8082678143											707614.4850251097	1203760.7609248671	629031.0561468501	874760.8322072999	1443026.0903937886	921426.0560398912	43198.6643478844	653474.7448210645	668262.1663991844	808944.6853473078
A0A0A0MTP3	2380945.114440272	875536.1782233636	1706265.6298871518	958733.502251553	1250159.2427353458	1034104.058878002	1204806.462636114	1525006.1910290185	1074769.879428517	1015265.2117598596	1868795.2368105215	1386400.7627141504	1065282.3660604276	1493498.1578909094	1151177.518297528	1191626.8793156063	1036476.8597715064	1218868.2857155364	1391484.0873533718	1221953.0382743804	1294880.0839700191	1151274.391787502	1166643.4858189228	1207836.7528356956	1278168.5936322734	1400366.3279420477	1178032.7395141474	1304696.5969021616	1774292.1627448134	1269402.7073612295	1429208.4943808115	1281582.44925233	1205976.8701694286	1469917.5589880191	1197852.0281972764	1247704.1917339815	1162764.5905420806	1457549.9796935942	1368537.3506723107	1204491.9121066332	1298490.0008444223	2222073.884860474	1417944.684419642	1097035.7092520024	1131630.126762184	1179959.256514467	1189287.489279154	1172212.381304175	1324591.2845231371
A0A0A0MTR7	33140227.52595536	37346671.71058386	27823397.22773745	27737719.286874074	32223130.846953746	29972199.984591026	26597174.53810076	27396241.285768986	24480586.687011827	30945501.39279902	29508824.15767462	28313291.025041245	30729066.24217482	21677353.54162739	29622865.47398305	21594990.36873796	50712272.67375364	23105404.24695628	34781334.348334365	27617448.92669931	41546022.68574727	35051553.31820879	25379792.954716954	38634887.21731671	26299354.495662414	21397489.70276944	20755475.27261519	26239704.407185476	31023271.989214003	31335300.01840623	37753516.01164659	36584325.30317114	38456422.73251183	26876192.88996956	23638371.252025235	24567824.163539443	23854490.16312044	28483737.23378345	33075000.79203181	24372970.30368321	31412788.812117234	34957560.8662158	31038902.988691434	25666469.15570127	27284037.64679142	28176762.54617904	26488090.01896893	29332831.43143565	29115343.5558648
A0A0A6YY92	668149.5367864687	1324732.8208253079	629432.35617354	527355.9233769055	416406.36040868267	479623.8692989125	457015.8139895141	548844.2066678446	702642.7672538172	654294.1298492042	759305.7270270481	579014.0237000653	758345.2352053735	526940.5901680362	717568.6631759652	673592.9145405171	550627.7961702617	616835.2362781665	708237.1157084635	518030.18142234563
A0A0A6YY96	1500104.1418643843	865322.3274623627	1391400.2765229398	1723514.7730735694	912394.8807592432	1009069.9454292213	1257057.9693679076	1433106.252082391	1702968.4468788397	1180417.1060457162	734212.1980767973	1910260.5386299968	963851.2532153984	1244761.5811451902	1220261.700792438	1616045.639912618	1155631.7735925724	1806879.696920756	1162013.6408809272	1161418.721048962	1494990.125143531	987224.3426090184	1818514.247058775	1498566.3733529937	1633214.053392149	1164044.8898209985	1258288.4772632385	998936.49858463	1112552.3790011082	1009021.0177239808	1396840.457937186	1641805.4771372532	1469369.4540340574	1427916.8016007326	620913.4090700031	1233255.8468757793	928083.6982429543	1369059.2934099892	1186948.0634809185	1701153.7566887292	985066.8247759987	1306418.950003717	916152.5517514728	1418797.9161772332	1466960.3302515969	1069140.944915207	1904624.1467394403	1029436.5834243724	1150079.659574407
A0A0A6YYI5											51824.189338342265	57609.09781537139	246529.2744550811	87098.45026321008	243265.75758403944	207367.07200258126	174433.83032267846	139253.57702664862	123524.49571375932	109285.77924830123											81596.83954734485	54399.414523271116	153742.93335124006	103441.2763701964	219060.5723702038	215340.5251444557	107756.98759957658	161160.2054271182	287299.47546828265	56389.52567716826	62542.528139021335	57266.4366731367	155839.7714249546	119765.21007989087	191864.500991603	213766.17530978806	184778.66518277844	125284.38339170428	243908.3242049594
A0A0A6YYJ2											293644.8552063709	289931.01570940425	213915.67540794652	196019.70380802185	352526.2268325803	240297.25239237462	187437.923297103	251017.0799443758	279100.21685769287	299600.3149574827																					289611.6485769882	242073.0005276464	60382.03437317412	333617.8113997406	307639.0547333469	252461.89619403676	265731.5270452103	269107.59226176626	193830.462433154
A0A0B4J1R2	10477139.742771557	12232837.086236605	10962076.240813296	17016786.465068582	14863811.921481548	13927424.059664825	13236195.216586836	8463523.15261684	12278281.1970272	12296219.66181296	8342793.394495867	10613994.303383997	10985748.929206314	11415465.29776437	13106349.241020724	12515739.069351396	13267243.044131994	11840184.96436245	18637698.31071571	15029080.155220024	16371688.94279912	12579034.98223694	11717086.79738664	13335271.25216502	12254387.408890534	12211365.117933815	9856475.147534698	11989424.728077736	13228193.5502283	12211365.117933815	14259397.462057278	11418397.521441532	14136232.724747345	11678069.842603305	12921007.316622693	11289074.547266105	12999288.770911265	11499480.973503904	12428091.77418024	13125255.505994994	13290298.258176202	12325159.683528801	11055949.686013443	11261513.648042535	11802131.97478914	13880170.315342234	11393795.095454725	15407035.958344566	12815855.836371707
A0A0B4J1R6	1203398.3854849178	426615.5544933419	826028.7555291337	511782.4541087908	987814.11453767	1344115.541425743	785882.4557417203	1045091.5850514894	1002228.7329485758	1122257.4189410612																					7107278.377836517	156374.46305052403	892915.3181528064	325801.78197283373	77402.87624044952	109997.19585376934	50261.22355467326	174547.82700806673	300422.8732395082	60186.52439142024
A0A0B4J1S3	4161695.6418078877	3905314.785528084	3778313.753113192	4076244.16671999	3554971.6669725375	3816295.123265158	3568187.1750281975	4024915.1334318076	4035223.229715222	3471965.060874937	3249109.6531990226	4168816.6652084836	3704465.8470951305	3534646.6287219417	4617745.580550939	4539655.483283268	3413678.293114373	3948007.109350013	4359673.854991685	2857330.922055545	2485117.193856934	3129120.277632146	4966963.420693326	2983373.5355822183	4653139.296357077	3127547.697333808	2862599.3686698913	4570107.056604851	3828918.510392376	5786246.304521248	2273300.299462394	2432609.061605665	3287741.6319532236	3218714.104554664	5247784.8554420415	4203531.906894886	6507584.251942196	4104410.634581422	3775448.385480381	3342004.415752909	5019164.712895252	3134461.1954989117	4796885.347541269	3655851.2720574923	3543745.157357224	3342888.36851924	4272112.758901215	3144769.803747213	3599798.2147073583
A0A0B4J1W0	8335953.404677598	12158322.784879426	10387138.659317134	11272669.69308148	10136919.690438164	9875715.498535244	9508711.403108278	8990794.754938895	10137829.022788482	9964817.863062875	8618441.614191689	10195910.47126318	9154744.039221857	9543100.967691977	11711118.931865653	9161524.874480857	10499927.9872214	8897072.299379775	13383519.482563173	9603512.045453995	11202251.849134337	9999187.243747698	11213374.26620278	10679840.099472897	9558441.62775345	10642602.588980306	9794106.233092204	9878317.947394706	8752646.318733487	9048104.598707473	10946222.70158431	11725290.452299198	9977005.647101223	10381825.348902693	10396967.2995954	9515436.682739567	8427424.920074103	9918677.639810368	8853627.6693484	10626390.794939442	10243675.414944816	10651267.580195148	10243675.414944816	9925428.265468804	9257139.74474863	9716448.34233796	9781602.102419123	10154330.39917049	10457127.671060948
A0A0B4J1W3	1349074.0290349643	432512.4201225819	492152.35457101563	519720.56144115713	485008.565560375	475129.3634435512	295186.7534585468	470007.40151139384	495855.0731814142	372190.6145810126	2161.996227913101	55582.52136877762	492943.3071084785	886084.1109749385	474531.5011963488	268576.54002567753	857090.7487401458	958999.3543163324	1071682.4649990685	319258.7748195606	766581.0882555734	509258.58397439704	526391.1289396747	477177.7820836472	487564.2945994574	517016.5212912847	550448.0155821592	524266.2773091156	666750.209375072	361455.0932808869	1225080.7787526837	408588.1657682525	570292.7057109015	507553.87499227177	344961.5214073779	540984.6507623157	233597.0354554576	622979.8532385993	525208.1002920814	407659.53310797346	733980.3608028357	420618.0942460068	448579.0717659591	499762.5154843922	579264.2054335234	511157.5069955496	504369.40149137826	562058.8964686571	585732.649459659
A0A0B4J294											56494.177969543474	59196.551858439474	44862.64293158865	87325.51312231935	58093.75676545586	59659.353614262385	53347.611486334914	82244.40293601189	33040.16171465797	60857.62179673395	170490.46789537062	45526.85050528828	52405.66562915147	81556.28705589133	136864.02049424275	33030.151876152944	29215.111822499865	19653.207472054637	11778.641386792659	14604.668281589036	137463.54691376258	43989.56903756209	90508.88964916927	44727.24185427552	38196.50648995203	58052.656852843174	54351.266948163095	32182.004983421484	49352.77948844416	46298.567222218975	35241.92430145907	67381.61451374473	20866.271457778446	85317.1150402799	58967.42908154303	53367.62402636048	69777.55665435815	50994.95999659187	70044.40329087197
A0A0B4J2B4	43615418.21500866	43940985.55093571	36558560.6248036	38787053.13202543	41473248.77340397	44594241.18263298	46789434.62031699	42608121.36148975	33567370.95797678	35729689.51809161	42248746.03687016	37405402.14627709	33294679.5878712	47590828.62274692	44403313.852872856	33413827.346293725	43016420.62293287	43672524.282170855	36028250.55696284	46590133.16029762	48027694.31681872	50449093.42301109	51330068.72480486	52312826.61000975	49202639.95771531	30926424.140513245	32822231.671023805	36180270.03303006	22081688.705251977	34331188.40614766	34326893.16572981	31001985.453374524	41459333.789483055	44874997.55238719	39173034.09839708	45212624.1311344	31096259.18030123	46678861.99895489	48316269.99932215	45523868.13704763	36970421.99671412	43421303.58206529	43923347.16262254	42750818.91409496	43121086.566556185	36306076.22009732	37125828.45180118	37306799.60512769	39682466.4645485
A0A0B4J2G0	1858171.371582468	2166869.87614734	2170815.9229305824	1877141.807670853	1949102.0148485	1981136.0716540809	2140497.538639456	2196305.914573891	2668606.048195573	2106429.18442388	2613865.481557064	1928082.3214552503	1839688.643683577	1974278.2682941488	2215571.871545836	1928082.3214552503	2137390.1974579543	1891767.3158365798	2340484.2856829893	2245876.820133647	2024809.1020203412	2382703.273561949	2216166.10067428	2336317.2054070598	2446939.0402471926	1867916.939145472	1668972.5326147976	2015935.692808566	1440964.4959122215	2714363.0178687423											2584193.135953681	2708347.21129029	1645505.7863034315	1665246.6281990588	1424091.9533347092	2587597.915305018	2307305.4737556097	1693275.8723539992	2771799.917383377
A0A0B4J2G4	4217639.314016975	5083925.399054232	4984617.761089439	5024154.448053975	6101163.08740272	7671308.6965352185	5721038.475863217	5997529.044298708	5505876.364278102	6148487.303617846	6462210.4130256865	5518753.129802873	5677436.782389164	5682611.638135373	5290216.873729943	5279485.606053473	6560481.003137047	5191787.301875228	6045777.609024969	4746976.256685629	6326510.070691653	6292455.492273107	5548661.96963845	5926991.723878989	4884755.504376851	4943944.022867226	5335355.718817328	6070104.013184233	6709499.4879792165	4417460.240516553	5192461.133941883	7046001.786320062	5041570.637826699	5608571.270696467	6002684.659854517	5943766.940815303	5080889.074947477	5601229.0320572965	5442067.279352682	5496489.750245466	4245965.418986086	5663815.387086999	5329951.728881244	5654525.5145393815	5965085.50502013	5955391.724970442	7074439.898761988	5395486.16987827	5519692.214626034
A0A0C4DFL7	14546940.256242964	30065798.9987162	27279654.21943289	29260984.555512555	25482558.514929965	25551378.23029017	35092010.64491633	28246950.67894114	27351117.86336555	27712767.21296417	17681563.879739054	23158361.40701995	18385089.39797061	26792007.00919231	37977638.085783295	27601698.35009462	30322694.412082873	22459025.89992314	32468339.66132213	33743745.077673495	15777806.12272998	35531426.3877014	39674048.26614645	26354243.743838277	16223086.278050365	24054778.42162651	33893677.70497504	21668462.790482294	24458701.28697906	32953932.54795186	14191620.756624546	34347296.73840695	23792788.89113469	35179970.99987884	27929712.976293556	33828724.56435182	23372061.1082756	27077409.91709466	19855014.45533555	31015566.59790217	15875619.547370564	29565547.613153275	26005418.875354506	24458383.19675491	29100218.935181394	24728003.169002604	44541385.97591932	38833364.60283507	21012660.771504484
A0A0C4DFL8	3176609.152376431	2465103.385656749	2670166.1830519415	2200178.822153264	3247034.7595626586	2996609.5857739844	2683837.036211621	4148896.7998239375	2983974.40330822	2821788.3726411136	2481697.893542424	2929214.165510838	2890708.2367988587	2790758.637151734	2879193.3059639363	3172317.385297715	2666121.025794537	2543694.2811576445	4291845.020792186	2748660.0500192586	2351196.85279979	4522177.130549505	3411424.0957746706	3065480.209004662	2368332.8668085057	2424152.1599656087	2482041.34788416	3937720.288398783	3038503.711703813	1793173.5847337986	1724742.5302293976	2887731.1932906136	3851323.59317764	3047177.9113752632	3007462.6744680656	2600832.5394202988	3760294.8643372483	2858559.8245888664	2387248.9158052187	3268833.4518720717	3412421.0705990815	4042563.4460598286	3100924.7877246486	2591500.845752957	2474662.4919246184	3198406.339650084	2941056.7864229637	2904435.809849902	2625985.598692589
A0A0C4DFM1	6892282.9002468325	10448880.176704653	9880100.952866014	8984918.737345947	8416814.298191823	9485687.698136415	10560058.986629613	7712788.944013831	12320122.37207459	8941218.395872554	4495018.224811459	13443511.06792041	8914299.259285912	8919731.884753125	9628316.68098626	10202321.496527733	5324825.134410996	10572528.291601187	10760220.17538994	11382096.008283665	5568460.141163005	6525391.872198167	12277460.887900952	9899161.280910408	18391159.050287664	7338067.803896115	8511697.592821855	6511187.507775939	11095937.198091384	7524354.550417135	3302118.7795858057	11228889.024704762	6707352.424908925	8447194.171036066	12774058.433762224	10269801.970400516	15734384.180395056	7957969.726799359	5900790.077472249	11320324.646860486	5755871.6913773725	9419846.168492917	6181856.147650174	14119398.779893326	8544578.260286529	8522541.005488677	10858749.27588197	10358373.96106019	11473199.792010268
A0A0C4DFM2	2802627.7422882807	3388191.2939963867	3595059.159222666	3570218.564670644	3493146.918659898	3599089.586815544	3640463.1598608	3343445.3223530087	3536659.08593811	3501454.534718688	3520518.605578525	3564155.7632461223	3293150.8319813167	3043964.47955031	3486881.629876419	3466335.8014745926	3328606.0225862395	2955235.592292863	4218985.860495498	3592519.9157300605	1876113.6384357943	2210617.394488193	3085073.9984477907	3218207.97674359	3304058.99617389	4438367.908188826	3465462.621170216	4407513.459736986	3865502.4124438795	4599426.6457204865	2141684.7627609167	2961633.851667992	3159566.302601449	3648634.33648422	3860875.157364674	3772938.3003987563	4081859.982101628	3749190.380833948	3343190.383587911	3750780.199716949	1955766.3856215791	3727919.0730504515	4897072.8523766	3450451.634823651	3434152.3180972133	3835721.9957713545	2732751.02343209	3979989.901494196	3480048.161567843
A0A0C4DFM7	11276897.219129553	10868282.653482413	10793802.379479537	10097918.153696934	11217983.214294186	12259517.960328633	11015297.417842232	10254712.210463056	10692481.101071846	11405535.137944395	12689005.72264614	10924266.792139433	13128172.226852752	10343824.298528122	10940412.61949997	9314915.304150533	11301271.861007975	9377496.530999973	11689579.009028893	10173485.819874454	13951774.130054392	11101960.752975345	9868720.452584976	11604140.68017344	11871424.355033996	9891104.848281227	10261146.889634887	10667773.427704612	10063975.339169187	10600410.386906203	14197301.302297546	11642120.171226207	12016293.517329805	10636371.96685071	9907831.817800405	10190521.334353812	8827238.568854181	10970021.380124444	11004161.742346823	10490570.995747458	13677662.097268978	11062435.558531744	12402196.951270735	10416832.323077006	9626479.788390113	11055193.985708727	9097375.502434963	10510843.665560553	10978212.662943488
A0A0C4DFN1	13761252.939798687	13651847.887045365	15506977.042427834	13651847.887045365	13059293.812505616	13072802.95814994	12705935.878147047	12388593.271713493	14120726.684559612	14071800.201340735	11534834.503916485	14590877.025031472	12979960.1823354	11434240.016963726	16782104.652606796	13075647.621144125	12582489.2826684	11882949.495509405	15768799.21086314	15359175.188626073	13617390.490489982	14727185.07917435	13948879.01668252	12593927.903656948	12417309.7624649	14149221.982810816	13092597.362900233	13922518.100086695	13445319.607410712	14076729.46217229	10949350.352885608	14944930.048420142	11029448.583450042	13218541.001303235	19211910.54460504	14758293.394677775	14528885.841119446	11816433.140063696	13416957.538507642	12116327.136518722	13066867.937773075	10790156.834612897	11978142.29045325	14181515.624314802	14401852.957700955	14929146.118533248	14073507.12755688	15712644.074355066	14610309.356443742
A0A0C4DFN5	1543018.0321952472	1802948.6669429343	1681426.2935241037	1420895.4494905146	1527092.479142664	1700913.0883397015	2149709.5783843542	1912266.7848817708	2232938.599362678	1996584.9856442441	2110095.7066343217	1855744.9589759528	1700722.7004218502	1653914.5466107347	2037741.407861885	1652089.8219706402	1482866.4455653685	1517456.877873244	1860184.5933611563	2096976.9678381442	2499976.235565209	1816073.693081132	1725564.4733542688	2044826.4470483402	1442639.4716758826	2063656.7042346657	2256453.7407761337	1156131.2967781727	1916501.731408199	1045970.417699655	1733681.4542979444	1842479.268990464	1791971.3426373345	1881389.0789217642	1645866.253454596	1987143.9469401685	1941998.5905455197	1677860.8423580409	1656285.8515948525	1809119.095411545	1699276.0851481848	4154816.1588379988	1224582.9393729952	1815697.3316428212	1630239.8663557768	1275444.8006809459	1845645.5120193826	1599264.4396866157	1306183.1705133535
A0A0C4DFP8											856897.448747277	1226754.4261136982	581011.9870439754	832205.6040075658	1454982.7091240385	973505.439166225	891372.8546102705	805732.438615156	1200308.6656544066	1440184.0452400828	412649.8556026797	570880.6975254071	961825.2226986695	1288354.2930160717	1651627.6291098741	1607166.1636024525	1661853.2012278454	1054137.8461283098	330161.6906885929	724320.7741685546	648182.8612936676	747489.2412017658	2462444.1541653946	993159.4930148858	778613.6932037981	691914.9890874531	1197753.1237000353	1104427.6146608905	1052154.8032662398	586819.1261782082	1376121.6161982052	1143414.6524194884	1067102.1028514996	1017805.122078652	1059640.660041413	867122.5709846108	643896.7853973316	1300863.9602688835	838421.7452789156
A0A0C4DFQ2	478334.3801987393	534907.7982888868	512882.698211995	488317.92456758884	519801.11930970656	572871.5393756962	517130.08331628615	580140.2602758235	485511.1474007325	468832.4980582114	422785.3176934221	483537.27565157064	543056.3299278182	406248.05351119273	611079.9034792178	492960.18236324034	581704.0861604611	455715.7976174957	644632.4965366586	517008.09448521177	415821.27434201096	520792.10576551646	521677.3331251815	590575.1496423369	509319.8447414704	600876.6260939225	471240.79041523405	565453.2538466814	406990.4175363202	555979.8933122016	724365.1890970252	451095.65867484646	204180.7067840609	351283.7474022761	564201.4723924558	620884.4477974501	1361952.2322741398	378849.3089499178	221914.88028867773	279916.4816446982	467784.52546136157	462977.5667958205	458898.6107789583	521763.7806766357	527106.0354073817	588236.8460537947	457389.0758750801	520511.187884056	636306.4327092054
A0A0C4DFQ3	853525.2120823709	1553690.1888498282	1049346.9759646028	1477217.8763892746	1476940.8027934032	1163113.3944294695	1221146.4590847695	801684.7422948001	1182411.5703819243	1255697.5364899545	1179076.061809069	920422.6879765895	902062.5973825251	850170.7120644717	1595894.8990030994	1165373.1649266698	1775107.2954846753	1020194.107107262	1261383.0045209974	1365095.1260230788	2448118.4423529496	930580.6905905444	1077368.7161896485	1189989.4200714373	825765.5365153939	885721.2089431967	908502.0239710672	909945.3290327644	1401800.2891122487	1456957.947416031	930232.4240439666	1015389.1733501441	1005060.3034671152	1204963.166062798	1435401.220477091	1313367.933638477	1434756.3378621254	1193677.7203009038	1206037.970421073	1295891.6147729151	799985.9890952948	889698.8665232693	1058468.5694653254	1297138.062484753	1663549.8292120132	922807.5782801972	1622229.1141452962	924469.5313309878	1456815.9046195429
A0A0C4DFR3	733198.0723619629	250316.87040192238	379726.1985985495	443712.2593571194	406466.33977604745	503528.39651041717	504034.45520037744	556755.6495204329	525525.755645608	528588.4228372473											684400.8045698989	454349.7035988964	465717.9685757695	420078.87730693095	637179.5320929387	460815.1601407263	465591.00341709313	313389.0778160699	320616.3253099583	609618.3261094885	613931.527070538	413933.7151892281	192321.5115287842	473751.3575617561	621176.5745942702	336779.7090991984	940476.1690330356	501777.04139562155	423984.7811189772	313664.5574758626	456241.52566900104	404075.9791769011	418003.3520657443	466624.9534945714	502892.4286747933	552209.5707235151	596194.2346863777	468959.9827185035	471990.5525623303
A0A0C4DFR8	2487388.518131536	2496200.2617616984	2342209.0879437816	2450374.4317801897	2939597.6750221336	2516300.563447798	2306628.6960965856	2799943.4462457243	1976021.6013022272	2571409.6844212995	2904267.0521960068	2064337.314014818	2555276.245981723	2682630.592533446	2480732.4817181425	2413433.111446375	2383720.596958216	2751084.8661952126	2046278.8246439225	2604307.14444805	3091069.7683101883	3125181.904112338	2236754.478040794	2655454.959313184	1832700.481669604	2440954.825598825	2401825.087549875	2427064.2883054283	2690134.0558211887	1984929.4311911163	3190681.2234762623	1243272.8182773942	3424761.09443918	2511630.8314492567	2381051.6967854155	2725924.5118655693	2096072.2152517447	2461168.7533475943	3112897.6734158965	1738608.18800557	3724589.596489428	2728465.5540854703	3365502.3208411965	2644795.119462479	2175555.27607594	2512946.773047521	2195258.585282285	2154191.5756443404	1581356.6029317637
A0A0C4DFT8	1390966.7668433131	1362242.763714022	1300514.5461427122	1233239.5241151128	1168264.751704557	1259178.478182755	1352532.2162800448	1327287.70466008	1700000.9353306226	1326239.489644718	1553201.1602200037	1523519.9588766394	909786.3428821444	1213823.082844327	1434131.2245983675	1126206.017173373	1061896.7475960834	1048931.3546061718	1863243.1665004943	1685731.1755206068	1834718.8924624058	1562191.5062995432	1156723.2961128913	1449735.19270169	1342282.7289788742	1259224.0333968676	1185938.4821020442	1027665.6680858763	929022.065080575	1672953.8082209516	1370067.339507591	1463315.4307068556	1585111.0298355278	1045776.1710736841	1272920.5961060263	1223473.755879046	1612337.68292044	1391520.5786754363	1198526.6426064072	1257411.2037384082	1541303.9012986794	1284479.4781438794	1056541.846554497	1338202.954416057	1261528.8726114936	1293870.1670857645	1472452.0847015206	1418684.930806358	1344953.1325138179
A0A0C4DFV0	795256.670864103	1392264.8083010605	1394359.7501117284	1372304.202729015	1664908.915308652	1259847.7263323502	1137318.7697099932	2637447.941958734	1501000.6680419785	1360773.6430030973	1230244.1745675462	1564653.966342726	1625961.4094336613	1736657.1017942624	1567241.5520099076	1517445.808934386	1412658.7767586866	1829137.8210331304	931856.8352299778	1099622.0351006188	1069304.6696594951	1823194.1540143152	1874788.66317182	1275411.7504427345	1176625.7646378842	1318313.0928494122	1532819.8048828011	1354553.437356106	1886642.9814684016	1203834.247585277	1184175.4693208276	1968651.10816188	1276866.8447914992	1179099.2713213384	1567834.514122217	2061037.9117525825	687418.7330908199	1362654.590982866	1360522.5878230804	1867228.672132087	982186.1979117836	1405397.4159350395	1227916.8295429978	1673116.343391076	1450618.149034357	1622411.2316564682	1171752.7298149292	1469762.6929742137	1921665.336265425
A0A0C4DFW2	1054474.5086456484	719976.8426710719	1164940.7472224971	863019.8508863889	890985.9872349581	1015586.4622906784	1043174.6778777805	1153262.995693162	1326161.7440643841	1355299.4347735015	1099699.1253702994	1096616.3953096594	1058424.82712569	924934.2604372045	1136317.3488008904	1087742.7424248273	804823.0303175091	1033175.5392953709	1220703.4828907412	1124447.3975393614	929334.877968802	938093.6473143373	977426.30268171	890896.642385158	1101336.1654031049	1094573.4792334517	1028670.0117543432	1049230.7592217578	1086098.3064047082	1491215.930641974	566364.8788604309	720809.8405277756	726461.4858219499	1042653.5349349529	1423314.3520496418	991888.7564076358	1607818.0643523731	1192297.0988302554	1156636.7174608202	1158637.2998658374	1066526.149410274	723452.1567898056	1020077.3306833257	1074726.387182054	1154598.085141734	1115888.8166712965	1152409.8194442086	1115888.8166712965	1110625.4618093534
A0A0C4DFW4	524819.9517579668	688833.3689128951	521889.6016879364	679295.3667241691	633013.0729710442	619050.8167550177	556507.9530054507	602301.855080237	643154.3825271294	791481.8081307193	639378.7813506535	575179.4367941215	584190.6902482384	583817.1667890003	577373.8871171448	507338.238510019	1006671.4023842436	521999.0342851106	649603.9860472939	614819.6139057546	958002.8558696908	355665.0244652401	609613.1553237417	480210.70474845724	543073.4360186568	812319.4101452897	656725.793460557	590559.6718702468	639009.396565202	615177.7949701186											985656.8366365522	504881.44119414844	609208.7813864815	639008.4995190729	575117.5639220577	472843.9115287862	942416.0859432052	432166.72974323365	525729.9131956573
A0A0C4DFX3	1755889.5946808157	465828.1003793621	682763.0435849092	463632.17240155593	334534.3483082593	326646.0633394407	463639.2789645908	530114.0695937164	474235.1644497337	363891.5602057275											3115916.068978373	139780.2159284307	419076.58710148034	484809.2745321948	204536.49292365523	307096.43432690285	428785.42294116266	140056.55850451277	495169.0506622036	125956.94617819355
A0A0C4DFZ2	1343480.8438769588	855975.5149861219	744316.4814663624	841301.3352082224	767785.9200711574	854249.9909901781	667607.2572580783	732191.568295535	615827.0857550111	739995.4456641246	1237336.7567562726	764680.6682089516	893195.266530082	829053.2434231519	622733.3760589575	807381.3453397284	868052.9525161663	869327.0562668715	472898.7749760268	798074.3207988628	1219083.2522841126	715390.8950217222	633229.5575163504	690177.1886423182	695369.2143791306	801613.6480083214	891579.4893168084	921579.079884902	845941.2537862696	748771.3395579726	871275.3447879443	721834.9419445297	533459.5962720992	1071449.8921764486	787832.9408656486	690531.926303529	610578.4033814685	890415.7336086802	1195062.88428201	790280.0032338693	1377489.3251987346	876698.7242260801	952117.6552477285	594267.063659761	524076.2886233894	725008.0424121361	916150.9083986629	802243.850336469	558189.0794493068
A0A0C4DG02											306352.3720435597	205879.06842297915	192179.8554802694	318860.3490782077	329060.30654098623	163230.96160826331	274170.3894648299	232793.5547207486	278153.5845324112	330661.0297924441																					418948.77702205494	213800.0950061066	620955.7535077019	131945.77088174323	172770.35860291697	141927.71960954778	344989.7464598482	236653.65818268328	219034.31709297065
A0A0C4DG76	2620072.628074128	1834201.3634880453	1868958.685655008	1686451.9553119692	1732597.7740826537	1710087.6185847588	2022082.4789811138	1708171.860670044	1913226.377470017	1620457.5161463318	1847417.489335442	1768915.6331219415	1565340.935463781	1589068.2018268108	2600092.858323818	1720829.2300661958	1588993.234160577	1526662.97452039	2260060.943620048	2248922.8903510114	494355.734247704	756328.2268968308	416220.4025953758	346979.9991729675	390015.37350985385	1793248.6504342828	811863.1796792606	1072655.7328693166	484449.4293385804	12150185.405344767	2244086.1505868877	2940881.7840439635	1572016.7669853566	1958935.7680656868	1883298.7755231576	1826308.3491300445	1924241.92082962	1324974.546825043	1318916.8909584282	1722643.1335886756	1617824.5545666525	1925952.6264763668	1584649.959704781	2188975.423537188	1624520.3443552873	1677417.083685501	2092069.084050767	2259463.8287666333	2064190.2502035424
A0A0C4DG89	101119131.76419108	89937936.22389916	106981131.7814476	85811149.51049648	99169010.22847326	100745624.06358412	100107095.46036422	100107095.46036422	102156693.44600834	98747441.82002372	77973288.80996555	98022004.87908076	90860030.5412458	86777785.36996022	123190129.07734132	96482140.29580604	93338250.10495353	87587818.30178702	132083488.65599585	98567373.58565722	78868194.51453415	91459418.9420098	97836691.3512316	105882180.45109104	101733049.25003658	120359350.98184896	101180870.78533567	101162162.82340838	98059613.5745928	88340777.19067088	79247537.69131216	91888323.34165156	103075358.23704591	90865462.69966803	109808519.62837036	102664603.17609191	114044934.57075869	101473010.79828513	96068360.13841878	95746199.306298	95834953.86812842	99520818.23254696	103246368.88891076	99458808.40138245	103135991.38943791	95522424.31905928	88786916.4579701	100842867.83297431	103510530.76967156
A0A0C4DG91	1462887.883334313	932669.0438298177	1014030.438991452	994208.7534728112	1133085.5312049277	998533.0303892358	1189776.051704647	1054673.6428417796	1017279.895633852	813214.0184911233	1221213.069404573	1087304.2423396823	784791.3573827249	863748.844388572	1204382.1914713895	1045699.4932030936	984065.9993260164	1111605.6678467179	1195317.1396722891	1112225.7528232036	754729.9013374769	682912.0248487698	680853.895658294	517580.80476573843	853659.3743804216	677495.8954001493	1045049.9144391009	821317.3442443736	2980418.662298	1596210.7217862862	1132929.849578016	1190748.7498016187	1035670.332696405	975148.7437131564	1096285.1178437795	960293.2751515151	1522396.619459439	764805.0012813852	927059.52302428	1005027.4339318651	808122.7709910122	789942.0156102177	4378492.5685903495	609881.7032284768	650658.5402968306	739224.7915089877	764488.958077105	720831.5337925735	609881.7032284768
A0A0C4DG95	925911.1898365287	338807.7620069928	570936.5894144428	323812.70801862056	384816.368063755	419313.3124970229	398972.9691277597	528397.3059718076	444621.4937856792	420720.2875720957	1194083.6210644618	413953.95688659995	489337.22809254227	453317.4089240797	347401.39681551483	369921.76848478214	523653.646945649	363959.86738103663	273055.07055154524	327624.20940410177	1464928.6191400315	1085741.836826461	326409.2548377235	322557.3990973192	148888.4320312423	371254.1695695001	540246.4470327295	194775.24216821027	176372.36991666802	125098.48694604033	933845.0553400336	674110.4204475268	275443.08025037235	423813.43630407157	265795.7039291197	556724.9204308246	341286.42364292155	489447.0541244197	433230.11449590296	362605.02805716783	1032180.9427587565	532208.9707746855	366151.11566182686	515418.86723790714	400238.75697560655	392701.8660546527	498889.9430894784	425685.09166912414	348226.747352786
A0A0C4DGA2	15962891.618697194	22931115.67060422	26081809.748564664	21362607.995136555	26574331.23829798	31428601.211902265	23028449.37730936	22260825.30256267	29589081.19913929	21032441.23470591	11558156.692632582	25953214.74031209	21922958.640454166	24498056.11068475	24486974.464766603	24338757.45061131	23278382.456818134	22399469.414934706	36484241.37690596	25331949.96602569	11185356.530923678	18065010.785128277	19425159.32172597	25088858.00128231	27677301.01275478	27649897.17620519	25280397.905961417	30665036.57458078	21636118.071617376	33579025.68621571	12924389.643497128	25638128.69553338	24728225.82123594	27951213.52084152	23903404.249725986	23561773.40871203	32940906.867871825	20213034.70906024	20130928.088746414	28260156.504899394	15106171.310580995	25561600.06489516	26052211.54895794	21821084.862429466	24327124.08447801	25637893.859393045	25025424.23134059	29215331.07611951	23237076.49558949
A0A0C4DGA6	14552196.17489856	18285974.90604488	19823773.03135171	18234863.580731116	18587398.217341505	19076002.333061725	16704619.01362277	17267306.13576142	13946543.222581925	19553584.060809366	15483709.075838707	17463071.480665132	18316535.903696254	17684072.15517884	19827376.878553614	15319766.757290356	17905072.829692554	15417007.054076387	20638248.44431483	17977400.323169768	12889884.091464827	20208869.684148945	17980715.376628738	19716443.11653027	13344802.789558478	21239437.841786534	17849602.37576574	19839307.286213145	16192889.755589595	16770307.93819816	13960511.069656584	15591807.240915475	20574890.79625368	16439290.073492667	20175873.644884814	20747520.30611953	15859110.83382434	17814464.516473547	17628220.41868401	17240572.819796488	15495930.863442687	17403049.69387797	16581260.004685948	20158406.61729536	19560483.774469446	21397703.25203092	16657771.458507273	11600931.112427393	15647722.031137405
A0A0C4DGA9											203790.98762737354	616512.862106126	885644.1739824788	324827.8787184184	390322.9156530699	1166550.840268342	1040511.572340556	597448.8211716041	753210.1150469	614157.7912242238	625162.7353405103	637644.4572522097	693720.9651976075	658173.605133294	608483.9431953446	431458.8200003218	416385.8634227433	452279.937984604	284214.6473314588	1785451.9254479562
A0A0C4DGC6																					36502.0108704664	48529.39972820665	345465.7167781527	441814.23170429416	566761.0448229585	394826.17816323607	251417.71854924786	487781.4309609536	486501.7685481157	724820.9201524727	12799.46301425937	291848.7120685229	269708.93620568013	332711.63171660923	718009.0273653341	485898.2290447009	481676.7902999339	456636.67342899594	324921.7105796831	410216.0322680149	12320.869848081968	199112.2509990586	97782.27284429585	527661.5548121803	464489.27878486353	595674.8951124357	204610.83295682922	529771.3917788939	537387.036172442
A0A0C4DGE4	4603166.288079781	4045520.760760961	3299078.8673405875	3776089.240012262	4115631.246628862	4831308.723617593	4653198.944276506	4033053.076207085	3574987.1073380536	4099368.2045952086	6660250.120030919	4373966.216572871	4254145.090875493	3841647.9373038975	4337106.641633826	3520914.62104324	3041960.203999452	3629072.717058412	3463699.7584512867	3908545.3151037195	1588067.1054043828	2560238.5395460827	2030343.7466926456	5623163.62944002	3187359.9891851936	5662358.720042463	4737659.009712948	4312354.223190405	6216607.743949847	5113246.916748025	1195814.5201630034	2362309.1938398727	2788363.2130915117	4915884.573741637	4435199.434279505	4248743.535531743	4617188.637664143	6197826.1429576585	6146172.819655917	4123905.1266650003	1920450.6283426704	2647833.4145876155	2043401.1716959309	2818226.54447676	5570423.118347528	5176560.135785476	3873652.964593575	5758929.732996211	5666256.090040434
A0A0C4DGE6	388458.45918095455	387645.7149771647	463036.05743630865	473720.55433759204	660699.2501100497	244574.21776967804	493540.1059738693	373258.7167030613	669824.7990648826	509557.345545633	442265.5377970172	546157.5984715803	410801.47013487655	569081.9004459772	315432.331428752	600428.0620729814	441659.1639020295	523940.73270800244	301030.9514227936	513548.157896685	227971.8390873343	384480.8681405443	440118.0941941091	366634.719483719	623376.7923808512	374065.18313192244	487646.98974033643	469305.4768402975	341345.0712775531	949404.6798221957	1143525.2923831285	523560.10516339133	443046.3790314515	438137.3579365909	375760.9990626179	335762.1795781692	327942.42688374873	401990.61303709174	391045.4364832856	283587.83174322103	550966.0999957685	446884.85691339866	555703.0465835881	428068.652411782	391159.9435816874	483579.74523779313	494484.59102850273	436720.15902703576	375304.33069745795
A0A0C4DGH0	1060628.0945492857	1367212.744435884	1422314.8084885997	1288833.8126544005	1535945.7766991125	1742703.8538768743	1904076.6597016987	1877108.9933429847	1779669.5991533294	1863397.0122045	838976.3690611189	1371429.9101536279	1197621.9545723791	1391948.5795695735	2014565.6610667168	2048961.1184691687	1674406.4478590197	1558470.0354076512	1760988.116492778	1984523.0081010584	864237.6028714972	1195065.3987075405	1492373.1017480004	1367182.8940162568	2100788.09119056	1932461.1116839116	1802460.4586203955	1508906.0681713538	1526272.246123791	2052143.1383973542	883221.5603076152	1079798.034608513	1262290.7056504514	1577364.6602671526	2022386.4062805884	1746630.3126407622	2860683.021277422	1473667.108799747	1464894.5703291236	1470954.7831297482	859859.3089855211	992209.9966622569	1188065.0052287816	1756692.7783378758	1656664.4694883162	1973855.9475054175	2779154.3607548154	1330979.7387246126	1951287.3041646231
A0A0C4DGP0	4284974.068048415	2705865.58316342	4192547.1815636083	2632596.8144879597	3452707.4638666995	3565524.715634028	3648701.4200735576	4205127.762185043	3447129.0462516355	3751943.775934435	3808728.314905882	3545068.7337521007	4149064.828466653	4039502.7461695946	3033448.512346833	4183271.994432703	3328423.349300452	3864005.1120829037	1974844.1395037638	3960760.16364388	3905559.619202457	4049783.4137263717	4147177.033904632	3695161.1531347088	3726265.910879217	3442680.1916229823	3613584.0220464882	3420192.2924428317	3154470.792161484	2732244.722507996	3905898.134439745	2612672.2609612816	3913394.599931852	3841646.2367808237	2952169.7255764063	3942113.9357669083	3286532.6247859783	3776986.3123243432	3770071.7642448656	3885633.716305832	3324282.5538277486	3141661.2665608726	3387376.099154076	3755342.952706418	4130971.8409985374	3076070.465467506	4974836.185610477	3011368.8387760413	3908394.461459037
A0A0C4DGP2	656834.5756069672	1573440.2772561226	1260727.3579386305	1298550.1967881985	1182417.6220522434	1227316.3351953377	1237056.2676761148	1131121.77555505	1676031.9702505094	1159577.9894405259	1236325.6099759478	1538549.5198301515	1157903.0770305414	1152985.4516780486	1391144.3176813105	1271539.761369426	920003.6837217576	1396111.36640418	1311202.016096817	1027314.1766524104	834745.5139363281	1234822.0597424195	1632160.4906153304	1214313.3077924072	1849583.0823391897	1173173.8086725872	1341215.446428241	1002217.8406662708	823915.0494234003	1296931.1816425896	572452.3387421985	1228606.7605152722	1076365.3307136295	1378108.5058836243	1400545.576673503	1257987.5142653876	1437625.7883999352	1201989.3091677	1259018.674802952	1590386.8135251328	399083.2842042479	876435.782337848	474750.99990557594	1782923.3545511498	1562760.3536501606	1219407.4409686748	898570.943984917	1679110.119227662	1955093.1984868625
A0A0C4DGQ5	9210736.944813116	11957950.837184714	9370929.502651157	11407854.955662875	11192700.934466176	13718247.201971332	11526491.285107782	9303152.634665454	9669195.980634114	11402405.727649387	11147950.052136352	13129941.17191876	13992937.305305345	10680952.14449842	7832164.908355072	11155950.016292892	11898946.6873314	11070500.399145866	7446366.636906004	10403953.385578277	11386667.659503302	14899803.37857591	10856915.890902584	12242486.348680552	11660016.148826515	9506433.999380883	10906553.374874864	10162846.933979835	10308336.111139968	6829604.3033722835	10405439.774234107	14476220.091026733	10833862.073844638	11065625.788309854	9212214.682126828	10196695.244069204	7906688.106672803	11725811.802385606	11456497.82521502	11480599.854300326	8608225.763459187	8798017.85834942	11884474.35412935	13080146.929644885	11307344.260568054	12436933.237584205	8674661.807817234	7669750.553303258	6950849.113094618
A0A0C4DGQ8	6828870.268946857	6706605.270208936	6195254.339408962	5665648.5155278575	5736314.918041145	7834629.30790588	6425365.823677756	5243546.897932353	6587092.767068404	6160669.874001351	6051888.481784938	7458883.095207253	4822332.198806478	5599638.246571718	7408559.648846758	6009500.53815144	5276895.171129028	6127529.669305277	8216738.901515956	6412033.043866131	6904221.721786223	5239485.177651798	7579837.326062692	7470810.341510009	7476437.540712727	6467480.723665185	6493647.199957829	6122814.7724986365	4090551.780436617	5538711.4952563895	6230161.726050524	5871382.421669247	7355399.490880103	7044478.529545615	6111205.102091681	5467409.811052617	6482370.190581293	5798650.401715698	6689650.831470951	6333291.503044887	6771890.424015266	5780497.861439945	7091090.711760557	6979044.550792921	6243503.426073404	5086540.005832377	6189385.892544817	6835578.037807906	5912107.637814629
A0A0C4DGQ9																					1766092.6621134754	860510.1070949151	526699.622732894	492493.66005155357	522241.1146683606	609245.199166546	706050.7811507302	524641.8497800325	443720.83094074525	735166.4633697286	905737.784584405	1088616.2161174112	760740.5020140646	666678.9949670339	683451.9169037822	729321.7179408718	445334.8789537211	617805.3308531789	636137.0141703025	653202.2038658712
A0A0C4DGS1	33170238.07993371	21851827.75109148	37336281.19075023	19810846.193949748	24014186.36269801	28534558.12044508	29147644.17707324	31862796.11281835	39608499.22980549	29171471.020591	29023328.50146111	33132166.851850744	24507774.51970797	27954752.65011477	34202005.79521994	31352470.19162972	17147737.30245609	26355479.84371628	33432403.825686466	37400229.31955109	21007713.307449784	28013358.40953905	28801313.654547144	27152372.10655799	28031802.40717509	37555975.38646565	38521416.19605882	22898223.065143906	37631903.176734015	24894273.47597759	25587298.90490633	35680055.25956681	22137030.806475464	27656199.64509124	37025607.15417666	32472030.25268492	41487837.95974843	24744503.86746506	22134021.581333764	25583765.608818416	25350645.55096487	30094322.44141699	29019651.80130061	31686982.98776673	30239406.49089064	28312887.46459472	33151207.18457338	31247863.853928834	31846918.88292647
A0A0C4DGS5	20251210.164098334	24211994.29132838	22189722.17514653	22314708.020526465	22335215.22530591	23148838.37172795	21760558.317693144	20929866.154213294	23560933.21212353	20794939.638423037	19944285.59059245	19947341.182606768	19639302.586512014	20775013.75665628	25843425.851064146	19437947.80303141	23005988.78893816	18141486.302145377	30782906.978520013	23980286.128360398	21957373.69015056	24122809.09350558	21087664.05106405	21090443.84279824	19066539.337094385	20296205.921921063	19680627.37703207	21726077.13180704	22994019.88378323	29476225.917008955	18748567.50634844	23349437.769970965	21685615.122743707	21766524.641770266	24365451.686806817	19966234.888212707	25672083.832654204	21861729.04328173	22638203.820086826	21444139.334789515	21624725.048111957	21719021.33951482	21309170.675306905	22189465.79657372	21320554.10663597	23673059.210100114	19475566.208637796	24717129.61978446	23503556.85374685
A0A0C4DGT6	1232156.3059654979	1937473.9167860404	1872433.8146478503	2057153.2518505563	1712884.4809378556	1846917.015514744	1911471.7437563804	1729595.2108049172	1799073.0171401692	1841785.920036891	1376531.5548062616	1934255.749006236	1867448.3293075468	1775308.087521909	2025534.330176672	2037597.5787895047	1786825.617745114	1736849.3020633776	2250226.696600938	1150345.6433156445	1245678.4406962818	2313784.284808849	1862676.4572094325	1536125.3475771004	1656732.2991414778	1833909.919084921	1694282.89522356	2238071.157004828	1405393.6426987394	2154291.6048572487	765261.8975836141	2109097.196179445	962632.6777411543	1647606.451422134	2910570.224563545	2089684.0066114063	2460687.1589572798	1396542.611205428	1352260.421695411	2246598.906746848	1665025.8151325618	1791678.6882421796	1829874.318113724	2045200.1838351674	1899393.5607669528	1721040.7451324626	1710253.2764448922	1805422.7224218985	1847822.2687945762
A0A0C4DGT8	1934382.825856188	1402274.5812832306	1581683.5623076237	1408393.279783453	1516344.6033231004	1767101.9793590216	1506510.9807334566	1921926.903909305	1640466.772899051	1772783.6279663714	1633839.330658958	1700877.9095239204	1646296.049608891	1396150.3993406391	1712129.1395432146	1740458.1294132238	1474848.7350291675	1650753.0100718914	1889336.0123471003	1607184.6309703917	1685362.4806037438	2090083.506963256	1619901.631588545	1697403.2067179382	1425130.1676145662	1703508.36362091	1652632.0560961445	1650173.034565781	1538753.9210865437	1388923.195426108	1905707.999530731	1450630.6606954224	1695618.4192315869	1726313.5322064846	1894903.1499427485	1661951.441929936	1452838.3313381537	1519068.4506200906	1581817.2431192591	1563009.5874513756	1252585.5853422177	1637293.2262762932	1330738.6123409946	1818183.222538631	1640799.4935104717	1933642.9329090682	1707318.3918960316	1693827.6112997634	1708520.5406620356
A0A0C4DGU2											216379.0388451061	363957.46751253615	274450.5506134282	306765.8271346432	215584.48831677923	347527.8690039778	329605.15540863073	392033.3636980472	143392.37387054006	175227.72054243012	215650.76743106265	374628.2885937646	310117.87514278217	303122.9110006812	182255.07742153323	293156.84168785485	424072.62543099077	211088.83429490976	209498.0063294821	241326.2629024872	293796.25214326713	272699.7484094142	136378.66679971956	337005.46884670784	294155.3127398934	433243.8708349056	108693.73985418648	185227.84476148797	276852.65681945015	426841.7526497768
A0A0C4DGW2	282989.56364066945	213025.9060485101	175130.60256934006	162901.48672284407	274217.5026501209	309639.3725385133	258485.31457854676	287775.37003026716	263685.2772903212	405113.9091425304	285891.58033440186	175771.67883039007	306519.5647167044	297565.49871710857	232791.0931272177	224451.18734316298	220542.00882836935	226508.13663648328	308006.22238130803	354969.9817205057	247687.56253929908	414947.548500699	237752.6625009957	306572.5086728559	159794.81579672184	164816.59987309328	241490.187043082	239096.1955522479	288866.1919655449	331964.6247468888	326682.4037766239	319316.8201855293	306739.90742743463	173006.29564786414	357279.9676507948	151450.34318436345	329556.2328112561	319281.0649253784	118881.77059437182	230782.32664427173	318189.34112139174	279154.04319486656	282793.31435316056	282793.31435316056	268455.6832571682	273704.28035480826	205993.7202362984	238043.08056248032	228332.26154210797
A0A0C4DGZ1	653608.248359942	466092.68146589276	724956.7514985488	508011.5168214804	472451.7280914369	598844.1388207547	758863.1881059506	686598.9822532656	833162.2888788099	700944.9914404935	695640.7088423447	566988.0512129064	495360.5275058167	545199.8353038467	680049.4439028816	634857.8493320489	617288.8340831401	481747.0128757993	790341.9861596331	896052.7401995023	925926.458101496	621032.0487983146	510893.89671559725	602432.3711957763	710579.7320977941	573253.0604615187	509832.141419224	768123.0771780225	538158.2559331816	643309.9501061462	480419.63679786975	384294.6632793341	674619.2763856241	547812.2990431843	680134.8539961086	640602.2721460782	1037339.0523606912	600736.1902544837	673849.6609050914	683726.3929052614	735591.9053540542	886846.0778220203	799301.6007147081	470075.52133702673	504801.4577095844	474655.0264411632	833019.0968441268	523083.88611754857	465294.32818426256
A0A0D9SEI0	2888464.0576546206	1842672.3331740003	2255901.8009339967	1905931.4018224976	2117306.6997424	2264146.4325946257	1785815.6474564462	1817372.6858816103	2310629.0973019614	2166632.340884435	2897505.350270186	2540360.339334215	1995003.6837925871	1982741.1088483748	2271458.169163726	2229324.2001495766	1377621.7906531875	2214617.060021996	1665007.2585515818	2181227.877029652	2586899.9921552218	2215046.941131257	2069962.324871312	2015113.2626266985	1750304.349209156	2188507.0723032183	2067603.2254199304	2215350.6751856217	1795274.682501111	2450809.4425536683	2591863.3304116856	2903006.1875762907	1766959.0977525918	1957214.5870064315	2221568.7457063957	2098574.495027044	1387958.7144374843	2007501.5059170262	2003963.532966004	2416236.7630227464	2723421.0959758987	1852517.7461130456	2051938.9199155837	1893845.1604208085	1843712.332441856	1905468.811075013	2138681.0752208875	2494783.105464943	2164264.7126495023
A0A0D9SEJ5	7962401.669323285	5653815.715522273	5533239.684335202	5072693.238457729	5089800.012999899	5553821.272456248	4989156.047087975	4581942.643779239	5389703.15419231	5341323.057440236	6334759.2848203415	5382809.972283716	5539474.720781804	5372023.219108438	5459344.55433688	5395842.1312220115	4254163.369637773	5111746.936709039	6652858.434581095	5664879.898853576	6990123.059660418	5253053.765667121	5900972.282660158	5065129.888584808	5668036.698492263	5137398.6849611085	5094825.112009327	5321884.167752159	4475476.525763665	6261003.423084986	6090722.416269802	5716517.192892585	5435913.980674494	6245475.037102763	5564299.837800661	5465323.063270535	4615806.218763507	5180470.745670465	5230658.866280054	5622712.360474179	6748259.8555584485	4021014.4879909037	3673567.155433735	5671495.683386672	4849575.78069042	4472402.497897004	7339404.730355626	6199892.159657411	5787362.095259228
A0A0D9SEJ8																					1459605.7127830018	1472697.5211315802	1766608.6185571644	1580181.2676734088	1505165.2058360546	1626002.596893433	1612779.8704613692	1463664.1733710612	1784752.5557474592	1653102.64017499	989953.27129996	1603684.3536775915	1745041.9504575154	1637131.952199249	2139802.379435161	1539742.8974625138	1993099.91829938	1735815.0267274028	1341532.8224552812	1198740.551558785	1826392.019369428	1941114.697263443	1416368.714174565	1729355.9362782587	987654.3902744723	2231393.205052372	1334398.9896191536	2078677.1012855768	1565809.522607499
A0A0D9SEU5	2632218.651613475	1778217.9944899376	2740134.693388946	2037190.5845369569	1950780.0204742446	2215227.4387630783	2468077.4452154892	2985245.318886175	2606567.539642834	2382444.1875761296	2396821.9875963726	2598511.1716536204	2134908.8062821603	2301848.0715099177	2416890.9062356814	2463011.4881602097	2101891.642025909	2846114.0415669507	2132063.9853410213	2404046.1086529624	2165869.7324142186	2132165.4643285745	2791134.103249003	2376700.685971227	3030467.8718878007	2239541.0474780165	2052948.4824591954	2448746.54697132	2393720.1461676657	2164817.9680200564	2482393.61015324	2438250.6275459123	2238457.262568546	2261975.4566635424	2854826.8415629608	2443369.7297306275	2158480.564668212	2266352.659980908	2171760.5543937767	2480242.1034379248	2601829.9423386687	2088140.3208832832	3779960.131884637	2155436.6798641304	2126316.355661336	2151885.420815009	2310449.137358272	2030787.4872399748	2206752.3731239317
A0A0D9SEW3	3956375.9441197063	5594991.755619562	6016225.931214869	5446879.277369243	5762090.08050274	5618438.132485443	5969104.432342954	5261595.713843748	6515119.081892776	5710851.169108035	4930705.3662095815	5310724.221511646	5246078.367804029	5393742.516628875	6513933.950406169	5919809.374413096	4698945.491372379	4814657.080213617	6846175.479452447	6176911.321762763	5685607.460854375	4274770.002925727	4178361.1327749123	5657019.78868557	5958697.104107938	6323038.434031605	5857133.493867201	5337342.827823586	8208978.569497943	4370737.433808291	3227839.6718794126	5938019.683013602	5278357.6088098725	5503099.91512581	7663712.645373441	5652317.231808538	4740037.088831657	5918246.218294819	5721090.306659723	6208964.3776236735	4365101.625802321	5730370.454375891	5821082.1900245575	5572211.187936301	5357583.277755851	6267784.13540958	5248730.0064251255	6054941.410115317	6642916.39581193
A0A0D9SEY1	996611.3053093078	481629.4959958192	556802.603289554	370802.85781419853	488226.3196971061	726049.4848537345	647304.8878910237	778670.6599593487	571469.0299370665	609577.1928998496	624021.7968605618	732066.0267392127	456650.9161389467	630703.8090375726	654336.2928840015	681044.3055735225	481225.092855899	592174.5454202066	464334.72924204596	910606.9877867152	598732.5985387868	582156.022413947	815656.4192782511	719037.7544165722	725282.7354650398	517373.2711055742	457764.25250825717	637408.6311057893	486973.6238416869	686781.2767011711	585343.4844961539	524292.9536471206	493915.39933512046	631612.7171202669	726779.4214739576	643714.8413733374	772315.1920221269	626427.5477222763	627619.4235956847	595143.3527886234	701387.1470018196	458406.47785279603	492509.0279087993	731044.998033857	708821.502914028	523667.39114330104	665287.3242642028	778004.2094609734	709298.938614812
A0A0D9SFF0											1532447.6546858794	864791.5154730201	878354.7450130612	2840337.54902337	1267348.16822144	1604604.035838898	1384583.7922820859	1295510.3648300343	1469514.2696200889	4308322.872768035	3702073.3038787832	1777126.2544525384	1754107.3332069789	1442327.9230269126	1252749.4942278536	1977108.2526401598	1217893.440882709	1393402.475646449	1849152.5409477626	1079718.4750074528	6880657.008724797	781791.6478312741	2062304.7735220708	1496572.5829912957	443955.2475700613	1665583.5443520674	449483.81688790006	1194319.3906214072	1748623.3975958447	722201.8335732281	2571066.7113197367	2829207.6463516736	1579306.8072453355	1395647.0410093858	1247251.4233625964	1065674.352925203	1937898.85256138	1797352.306155407	1457036.9790715915
A0A0D9SFG6	2611639.6147567825	2461479.3177872733	2826641.8581449436	2323353.398684937	2754974.443682224	2602838.353331536	3151390.442978525	2886095.2771603838	2819457.154940661	2819457.154940661	2595345.709148791	2590286.8808536697	2971461.2532034284	3212569.9175022114	2681973.668215937	2710791.436857226	2580238.212255024	2783971.1038917718	2204995.9339167885	2925702.1296639275	2624040.6381082167	2574067.298215556	3078518.130108742	2643069.190217753	3042248.9329840024	2458175.695003188	2425877.003958655	2929447.2483647456	2369330.7074658903	3112562.27135091	2547516.6473986604	3010158.2201546673	2764893.44665377	3013718.9168664063	2772363.43975532	2901096.320872035	1849072.2924037192	3065809.668761217	2249463.9226468084	3083239.6526648323	2933990.1269687167	2919070.560510436	2871299.2563699814	2638181.0304593537	2641337.092594759	2602173.230641773	3346716.979857872	2558418.732855472	2376658.2453300767
A0A0D9SFJ1	1667240.9271472152	1838135.7440083304	1712659.0643700287	1610932.1175885587	1872953.626824256	1406429.4926155007	1578494.048357132	1457575.3167704982	1787199.6661353558	1541151.142992229	1469934.0035344483	1648339.070611381	1222435.6445837906	1322569.3556425776	1795084.972605875	1768272.6503862203	1364540.95234796	1707326.179494621	2251822.569186068	1922443.5031492345	1860298.355644074	1699026.0052250703	1655003.012272856	1774286.4354206054	1724451.8262370753	1597903.8828001816	1489517.2400861485	1459587.416494874	1579916.9305642603	1632773.5801880741	1262709.887966947	1860957.0863991997	1150603.333580611	1540743.9420276573	1960901.6480363975	1659727.6763746059	2450860.777909696	1542661.1734054226	1525441.59529031	1518163.2169117576	1760936.883516341	1850113.3585633072	1637339.7815945516	1472792.3945832038	1523779.697157128	1807558.643169556	2218218.176377469	1387533.7144650791	1537641.2287386963
A0A0D9SFL5	398982.3800275545	346282.6884742841	423349.3926521519	398982.3800275545	535882.431376336	506701.58957168	520989.0951611569	534519.3124685062	490697.5638760468	468105.1301259021	435252.83896883857	341861.67555225146	478853.90687715064	314478.3860895573	462535.083082962	334055.92237515503	647220.7189332916	432423.56920885545	540466.3081682125	637343.5361104932	824900.8293600018	475728.51956071827	415368.77884286415	621013.829451693	356368.5973334121	369378.17251726036	285554.31511646556	433886.9128883417	427089.11684633093	415204.6941108157	462775.3397891247	330704.67417540104	492497.20095703134	408288.0997454953	569586.6815564269	352864.067516058	592580.6715717128	453611.80895340344	548619.5691795255	412972.06067453505	523229.70294017775	530974.7520782866	484762.6255542368	466561.76007968094	470382.65098781453	470382.65098781453	362803.9184594818	448670.6965706493	409764.7330668822
A0A0D9SG23	4859974.370652514	1812192.3980396125	3479091.044967886	2078564.2750770662	2778869.9950315417	1688574.1715695928	3005785.643620345	2709440.580164818	3489674.797234156	2792671.2079867558	5044272.48126636	2203302.9066799167	4551411.208399389	2148318.38333776	2323499.843720185	2201611.075192466	3155419.526958584	2824974.0768869063	2502833.981389989	1739202.7690996127	4147882.777688122	2296389.0516080437	2133078.9510694267	1833838.5800759047	2195481.997616703	3041780.703637956	3659136.662694505	2831354.3293117764	3414117.6852219338	3141826.530994946	5800466.29219192	3308827.7853686167	2289612.91027791	2804347.50063267	2103678.685626654	2804347.50063267	1672650.7808309954	2813434.392996417	2693096.17259596	2404429.581499007
A0A0D9SG71	4058064.0346442712	5215861.404073302	5331326.236926604	5973730.579710436	4357747.7599135265	5334212.857747937	5510296.727849223	4831678.414761402	5099871.731070665	7237020.819155438	4708873.1853587255	5886787.518924675	5381421.314165462	6008839.287333474	4730635.143301625	5544808.712689133	5118982.464211215	5964503.615873613	4821309.968063704	4783658.32654345	5662029.911813517	5788215.052735784	5793648.86263196	5335397.561387935	4512477.240445109	5070348.38978566	4886001.357752491	5976184.624699738	4733608.951700975	5191904.729685261	4796426.837017257	4793416.527286912	4145060.229521087	6140040.801434045	4758023.708770052	5611688.085387797	4225434.260510724	6472834.877960807	5728260.1617768975	6278638.930088801	4716286.41048178	4992387.952182155	5117633.19936232	5621745.319262481	5400559.001325716	5663574.020404062	5173030.135615083	5289203.130916174	5282852.55460082
A0A0D9SGC1	1914078.3278462682	287853.32446710515	284927.7272674837	157911.01684774327	117336.79968534062	536885.2460940157	414697.0430524331	1149021.9401574256	178064.56555678797	170656.44464783338	1918594.1850109969	237637.76889482664	619144.7903965465	288649.710895322	259693.61923763622	455283.52937510796	369552.31448328315	445766.49225684756	290830.37406480877	326297.30289996235	2054129.281700987	705095.5769132089	255350.2648110701	227125.7789489418	301061.18252936914	130296.44855745006	116239.15984340713	607046.2629038447	248195.22575489976	566907.7027915034	2443575.118779054	183823.87143449354	400520.68447752966	333349.7380884327	292397.7274031463	348379.7012307445	357453.3456462882	237621.8617289435	192717.5274025306	421599.74389687047	1936580.21204446	343817.97490321303	620960.0002923298	273357.2135976247	327097.1781413761	247365.2640324208	361705.846194415	283293.7079551156	372385.1235000345
A0A0G2JH30	335283.1730152559	257082.02510698955	368134.97587274056	324648.4966823614	661395.1632630354	1308450.834860979	424347.77025681705	649303.5297361629	207595.15693468228	691809.5532105407	237378.530070688	594113.5814114844	1108650.4831676194	392426.9595014651	256213.79335109468	519123.59239580727	758685.284060257	432397.86438590655	427328.2408191849	501731.56010188063	487407.1365242575	380156.7339445417	345448.22697025305	417580.911882521	540623.1271209564	818328.3838873723	376566.8401363758	507495.6614611449	556340.5378354656	797923.6506875895	758321.3883711263	602639.2522159979	612321.6324896498	537549.9448253658	296669.448915347	290780.9809121872	491028.41293910437	534928.4568329076	661299.9860371847	442511.12511888635	551377.4777806447	900456.5421649232	209696.8232317601	444053.0333386336	480956.0165866058	623342.7484106405	515899.54939663276	577859.7473359072	476383.9655647332
A0A0G2JH68	49255257.53784042	67195565.26349665	55080175.69439916	62738659.34121402	59016946.680124	54144399.24201992	61208174.66601506	59904414.75724247	49642083.33486872	56607806.82857365	64969655.87217952	62357617.72325434	73005308.25376682	61089943.30746651	42696777.43435391	61501764.94163352	60113688.29760694	60261698.68009153	35821580.13396805	52975446.63871217	70077122.42953785	63954333.72316477	65341416.90711577	57715760.62882786	61908809.53580376	48919593.10750419	56825323.54996316	51978230.68954873	52345639.36349824	45727252.12507285	68970327.64785771	57703360.81472061	57494733.14820249	60973598.26512437	44176128.37184579	57939619.99419323	42756383.54219523	60824171.7365742	62323945.83418835	61631212.71104793	70372265.53996107	58060837.45793162	57354853.20796502	57524982.16863518	57381340.35154241	55541553.54601977	50991826.33164265	52601429.67211485	55824711.29822499
A0A0G2JIS2	12999712.316935776	19208625.05665121	18205956.66269921	17866342.490616653	18283329.593733564	18347983.686789665	18988684.550912328	18452914.10011022	20958493.384730414	20123321.487920314	12728582.503138846	20041953.068390287	17375603.39767674	16582449.52708215	22685783.31765857	19577988.796490546	16820438.72761785	16997098.07366977	20747429.61964628	19878034.60180074	12329802.263850225	16615936.212467575	19060652.17036892	19254822.284760267	20442572.29626354	20527207.62259529	19270812.76476897	18088659.42126873	17952740.341194794	19892157.130821254	12647326.954037884	17347447.287484553	20419788.22649509	19151031.092770644	19537892.935096856	17410991.05044237	22686421.78683111	18016637.245820504	18195756.522971436	18022070.237553395	13976359.457907114	18044372.44712092	18570693.953660626	17941861.010479808	18003734.921086714	19549927.24229116	19643655.729757134	21132300.0705454	20293200.702336024
A0A0G2JK44	14047957.13469402	8623527.435345488	11486461.56304145	9347942.230333878	9922160.714955054	10466674.636801656	10189920.15404981	10616243.385983493	11917386.910334572	9589239.50611185	9544758.0653496	9945542.931377217	9394102.844264386	10379026.903891398	11060522.629757358	11131752.167558474	10763258.025334032	10104147.368881036	13051150.779505892	10833252.917813262	14619966.608524105	9756135.689360887	10649446.26983072	12021162.744268335	8977172.47891831	11435270.20948346	10114770.622628184	9761898.254451193	9218409.27240466	9653280.681987263	8205058.639399703	8664619.475124018	11502165.285978135	10140899.099358195	11153017.350363486	10542624.60645364	11739585.882196095	11553674.875538224	11152195.8258091	11553674.875538224	6638988.712093177	7764100.175912735	9520219.493773147	11917520.472864345	12259223.02658526	12218871.217477512	10716410.240061434	11723488.369495185	11531173.364385925
A0A0G2JKR7	2225499.2697436158	1871618.7652509147	2496962.7103318824	1811267.0513064237	2238297.1727203825	2159541.76418768	2115888.1529155765	2129246.635053488	2071280.3643479086	2552782.08212244	2035118.6438742003	2277282.688748876	2496771.6383648342	2084398.4602984884	2172899.879686	2227602.4441233715	1823102.0917080615	1977368.752956384	2408473.8265372645	2169370.6819803617	2397563.766337495	2181051.623583537	2443276.50281146	2181605.717358979	1782519.675596885	2260841.127247184	2022026.7100316857	2309047.285710636	2173822.0850484576	1920627.5491258008	2217855.272900418	1788374.9796185943	2339665.7323303293	2185478.2525695544	2395429.4207041766	2269446.9677289096	1969768.5581328904	2140350.209712742	2301001.3414451964	2065019.2840064485	1763314.0583110212	2078092.1694549816	1945069.8759652898	2334129.4770521875	2353915.906347344	2424382.5646109055	2080033.8047150497	2250243.73645599	2294728.9829497132
A0A0G2JMZ8	23221207.16524181	11347300.328442112	13631245.55512022	13919176.115352288	11264871.658824226	12429002.516684216	14680710.663047865	12377342.152315404	13470946.483328754	11946585.878828378	19974299.64496141	12311257.12229815	13126164.587868378	12947577.314564046	14265001.89224754	11217478.76072193	11329810.155630352	11706044.085545355	17310601.776214488	14100152.101505078	21610542.594929207	15007203.857009767	11438872.57061336	12007030.89187138	10972682.095982136	12396730.388600795	12342908.994126085	13528096.549516248	12431745.990165947	16552575.171879001	22505253.2841398	14688609.472929332	13615658.194228135	12291037.708374547	13874876.809505887	11146667.692629043	13428593.214130793	11162701.833780246	12513444.607925998	13061544.999611218	18990009.23654858	16684690.242042394	12604817.10777269	12688957.790447313	13747501.862805486	13469484.761955105	10126602.581448	14356843.25830397	13506886.65251176
A0A0G2JN29											959934.2309092019	481935.2180498652	523015.4547605394	683056.5594516303	683806.3128212547	538260.4399429037	634260.1109785708	489307.7928511725	571905.622404802	703237.4209840224																					884300.2471532684	667228.5234886617	743250.6763121096	563622.1328470383	615209.8907966566	410651.6941331732	496892.67705384456	726048.7038382696	618709.7162903744
A0A0G2JNR6											504654.6845266562	836044.0263030701			718711.3863535554			788967.9025085487													998375.2148261784	815058.1991676344	717294.638168977	673789.0264216895	528353.3228929129	712952.3480230975	517146.07880211924	700928.3398334362	781364.095392822	677376.585185071	1144842.0882899212	515386.8715352837	591702.9154113657	621503.0930971616	581073.0358284132	545917.3462916642	648868.9472143424	888325.2422471099	848402.3357218229
A0A0G2JNU3	630877.6902882118	1931210.9917475919	1105727.9123530143	2206621.6694241897	1216641.1370588678	1317749.8778128228	1011564.0143983213	903510.4308451049	859390.2530615608	1144741.5880782777	567325.4155437191	1271942.5634161455	912251.8011532342	1175761.983320602	1087006.0179214498	1012802.2973272257	1698709.4161647446	1203126.991773017	1383736.0475589586	2015337.4131885841	2086076.3319401143	1343614.8499141529	1395876.5365489062	1104837.9703446245	1352757.0457855214	1124511.687916633	1145078.0293374995	708570.5700870607	1240891.1215012143	825821.0317822213	2133330.0920915	1626906.5795101528	1110120.0499626515	1136622.6675819785	1377410.4147367566	1205070.830064313	957490.5171670127	832205.4156938331	841146.0577822806	1107710.7210881677	801533.5704730394	1348108.4919165368	1406788.5658512826	1210384.5464179087	1095310.273162502	1045927.0185423584	1110154.5198942134	725360.9804366055	1008265.840449322
A0A0G2JNW7	1251057.6129539416	4619690.424358611	4670477.903790502	4705722.66322384	4988994.207986198	5461538.8673675535	5654923.140881943	3402060.604979022	5654923.140881943	7066048.878666053	2956980.3014567127	4760760.971239702	4446057.202902074	3746701.49184661	5390420.573408218	5019632.232819792	5137850.949159677	4840665.73260376	5639335.248004459	5537042.029528868	2939942.618669109	3865293.5786197037	5335849.21469707	5328614.693119396	5943117.181933736	5276470.487594155	4717024.933992559	4850468.467001071	3979988.570708841	5238684.0248922985	2737770.906731267	4131792.1344805867	5432287.11455469	4939311.959943878	5891746.1394065935	4829067.335454023	4926435.387803463	4311799.557347623	4495599.395297109	5779640.585655348	3775067.151321926	5253005.459357689	4385412.339575856	4314578.735163189	4630716.0076334365	5082075.252329206	5161212.79332633	5097214.60799822	5565984.111713357
A0A0G2JNZ2	22386121.612119056	27017608.06171284	25155573.93142048	24286555.66805557	24210583.847508904	24407241.14865151	23876970.26169688	27427214.168840077	23619576.90565402	23254208.3408996	23324072.97585141	21039401.536815766	25602411.29932493	22863338.81870701	28449146.74449894	22174454.17343715	25961734.06861252	24003299.61988904	28579901.83167341	23643895.31173859	21785885.51471847	21260907.62089541	24100342.496604066	24555767.40301888	22532488.03902032	25085547.396195285	23628652.41496016	25552590.284916602	23648790.25095809	33490685.1303344	20935275.925314266	23791959.283115923	23532140.69500077	23240237.97130724	28580673.79336417	23032237.212363344	33050434.24992142	22552190.538325306	23759875.14753754	23166633.18968624	29978431.562199157	24405555.417269483	26928968.67763219	23082925.367313545	23639781.066395193	22154925.922626752	24633186.512422666	26662243.401060134	25756038.174560577
A0A0G2JPP5	146721.92441281606	158169.23996928777	172837.4428721552	178417.47726747987	250489.81856610204	275171.7628886061	246338.03892306014	293364.05805734824	186380.5959422188	166496.73648585673	59821.55964956085	225219.97664032067	275758.525008746	172396.3264758727	225254.33907334355	214516.07875368829	219026.14808794355	213253.25934009685	283679.0658205236	185479.8228493406	29488.449479799536	667846.6186867878	63544.15737145022	58080.13778489682	64081.648296350635	101355.22948839195	73036.529995152	424179.35123259225	65013.770716112136	527773.6547581351	62763.64518232224	173390.93024901324	85975.07696932531	192209.5152624827	413884.4270449532	171579.58959011207	505460.8330289417	109066.21361333267	154641.4803751965	205428.1539640821
A0A0G2JPT5	4805311.6608377835	4393159.353267531	5253925.213718774	4384464.748616508	4623426.140960744	4657559.475993953	4805311.6608377835	5093916.4410281805	4845979.9729151465	4497214.137962028	3848626.527010407	5522509.583446295	5172525.215924476	4093907.380952868	4579268.2421796685	4868541.736335884	4143512.816074892	4842280.03538893	5709259.456846854	4579834.671023623	3705049.843070908	4498367.762200818	4349910.60774376	4602026.810478942	4943231.803657349	5423493.597879734	4878905.202648954	4871343.601276867	4582636.044454888	5505310.307397602	5621797.648184847	4350760.111595889	4515025.679136206	4515219.5028147185	5804340.788609003	4477908.444700842	4203551.027764771	4505625.230728294	4645565.926615149	4720478.778360674	3565205.6948484117	3984056.148919608	4966604.860715397	5096279.289079197	5455208.646821767	5254522.7424733015	3874167.626748838	4954539.021351682	5028594.329771114
A0A0G2JPW5	1300767.8402704834	2712434.5418170504	2028458.3762357545	2979825.5216335827	2960003.0969876004	2502465.5717761805	2669431.0561829926	1875021.5495991968	1777295.903718411	2519683.099584412	820603.3832053043	2200131.9992282614	2455585.8806610983	2618781.74153685	2844102.6309219007	2332041.789875562	1952349.6175280118	2711145.6570288944	2921758.9165585237	2468881.578050399	2188110.024608231	2009803.8906600128	2428720.8306487	2288945.2175996373	2577855.8078168845	2292292.7273940668	2406347.1682471517	2296570.708278296	2729176.913830411	2107564.839962657	672422.9234167541	1824060.0480389446	1348000.7189867338	1882914.7320008385	4520387.852097229	2412280.521573064	4221762.884490209	2075688.2994324008	1767707.5040606437	2600158.59773238	4073904.0309289363	2415994.821577774	3417019.3399194493	1678106.8721991174	1759960.5584776755	1323655.606465603	2555323.2607324454	2607376.5356862126	1595934.2754545386
A0A0J9YW36	215477.10738631003	180485.4354414733	209145.8066716404	193471.30378152427	214057.88680269796	198131.0780310507	237159.64408038423	233753.51467971512	191776.12363998755	212504.62871952238																															154068.66082073792	102445.92010848383	192855.8906193668	140986.47673514776	263208.7804580641	200672.87837922206	265743.55994929024	206890.7435070286	340672.66242650995
A0A0J9YWL0	6882244.857832626	9255980.65974638	10850634.866792385	6838328.909573377	9734075.294194834	6945072.4464077335	7598539.481909454	5466097.688716471	8710889.996003198	7511771.771336563	5959907.909123537	6904204.615136426	7098984.170193402	6828959.148971722	9090465.77719514	6901417.746019213	9317934.553789133	6496191.912219315	13746420.22261164	7449150.508731643	6184471.737942818	6838609.019004331	7247014.108261477	7936333.710511219	7941955.627814492	8231121.664590922	8126209.433625	9683683.641063316	9345984.13626424	8258251.9493834935	5869615.832571423	6751901.908404841	7564158.999743857	5972878.91140215	10831940.889761142	9103767.984272186	12733405.858575227	6624108.902802064	7675730.6021586675	6666126.293498704	8022014.80458127	7520130.652472082	9030662.086299086	8261247.334637202	9254769.786106752	7939885.350007341	5089586.694833775	7306285.068671573	8408104.557370383
A0A0J9YXM6	2611185.9238688545	3313978.1922255014	3817420.9210032127	2976897.6835056175	3882128.340087834	3496893.472979395	3143022.2998213964	3179613.2760969107	3679452.348120215	3505368.006445802	2776605.6444181204	3447785.320815463	3059022.4804244093	3253606.8348733536	3807342.539902152	3532535.7383990264	3056485.802256689	3592704.687588136	3564455.605342851	3515413.160766908	2198739.214101635	2262728.4769787397	3004301.2156460136	2747700.0126560545	4684312.162297977	3943218.544567386	3351876.8373803017	3355230.6839370886	3823385.0747368033	4234470.838411512	1954635.674445032	3703317.6146058515	3104858.4084035377	3343790.7249901667	2598481.6942400723	2962942.8118729293	4985331.490493703	4756665.1014005765	3002401.2376002786	3193534.002221049	2883186.021278448	2771375.3601947296	2584227.886158592	2780454.0036160573	2699701.8595000384	3687362.699072885	2826165.769614672	4467170.3866311265	5077669.338103907
A0A0J9YY34	619657.2072369112	952997.7412314431	962352.5280229764	916129.5079671395	817072.5010335263	1124469.0213292765	997347.654021064	1006828.7479022845	897935.9122823712	979495.3562169404	657897.382683604	916017.037503388	833926.3079292383	727513.6214923152	1054358.4800661365	1047279.7015762249	1112358.2618657618	683506.3901809065	1018783.0804758114	1222632.1002062731	1078337.6911117637	263124.4804436945	817506.5777298205	834225.3986761764	871584.5231782951	1466494.4429678912	1133343.487356214	613221.8430460234	1586344.755217893	610088.1582822562	931405.721360562	634046.9301476623	806781.0121644306	1147833.3400453485	992633.484622897	1031601.3018995158	1058173.7896249238	823695.4722811871	984137.5191596714	863954.4697193903	991033.4846642328	867261.8276058353	969274.7714446451	1002924.8744470305	823727.5339471103	941359.5230892828	1040791.7823369326	991033.4846642328	687980.1510081647
A0A0J9YYJ0	7891677.640408362	2079033.5924225238	3510831.875596991	1320817.0125685316	2432961.2579263244	2426199.7939608367	3300122.508809061	4428551.390396835	3203768.1499919137	2554667.6093051014	6762817.975149164	2508848.8042633543	2562666.2133239564	4292802.820257382	3044097.071971517	2525463.931871191	2211567.465580984	2802672.352248256	2695658.163226597	3742038.8250605767	3138033.511117892	3163196.938600669	3159442.5924534244	4337562.618989923	3480061.6849179263	2993341.2174540726	3685257.9040952073	3322854.904096622	3240011.0676243426	2628869.7071815217	3981267.8696096265	6010185.764961784	1825352.836165936	4063776.4052720056	2997238.0698858337	2832088.9849040164	2318423.845284312	3146017.461392235	2640933.2094814177	3333344.8407601	2578602.092150102	2530846.742526073	4542859.940831773	3203842.2758847713	3089839.6094420124	3848134.7894564057	3426493.0324108787	2955726.150393568	3027463.153231008
A0A0J9YYJ3																					477476.7645948121	293057.7256632677	97082.63302334216	258219.38192899452	190260.88426415846	94428.43886942057	145720.49543826937	231562.89440286453	89381.86996023793	237666.5591341393	668019.9331556045	144010.60319290688	132461.0057233756	138417.98263776005	148058.45260854642	182285.4900533653	188596.84096098077	165827.06410013302	205057.7625057147	142036.59031511965
A0A0R4J2G3	929269.8772621251	724471.2340317245	778518.7389390938	742966.3457312019	714535.670066851	661109.6764380053	780129.6482203788	781852.9465212881	763458.6103094072	689019.6163114293	1292996.9387582277	790111.4380566898	762004.4714624083	596395.822060962	728372.1556812786	641718.7555496604	512705.8445036049	742669.1232240845	759524.6434638331	738831.2941786705	1270182.288419218	982526.1039312659	634818.2801304642	649847.3463844154	419506.9797842024	720792.0069620732	829291.3815904545	535079.2785693646	819884.7514936194	703400.5122334206	827002.5725878592	918413.868996572	576174.4809522573	857102.0801207955	934798.2686516064	835331.3090791685	415713.1802473592	630144.0107326214	792868.406639871	777781.1052908602	925158.9681873613	601884.403795722	624376.969750718	805342.7995424793	726106.1676240966	809748.3947259721	651899.9243879564	871346.625564262	806704.5289628317
A0A0U1RQQ9	12667158.14368624	18772388.03113062	15410805.542944787	20803834.838682853	17090204.495987024	17626404.701591372	18073552.088302072	12300232.953065146	15490751.29863738	16033543.027090348	13032758.749362014	16750102.929635055	18131548.40203382	14509159.45378819	14280654.28252223	17790934.7955355	21859919.641510047	14795250.378670773	15953704.209405167	17164842.878554773	19013985.36398266	18686922.895578	18818269.791134126	17114239.536866225	15531552.937764416	14177027.204254474	16299506.051742448	14878732.771440752	13761718.758669887	15986917.837258672	15135405.196500827	16153608.431772487	18531878.6662001	16773729.460926745	14201508.164945936	17179444.91348732	14541193.977849275	16210936.832248226	17476926.78170974	18064242.08489429	18915534.767735112	16674974.051755335	14288319.070804533	16280338.793231327	15529306.979098268	15968845.361732155	16755270.136319568	16512064.90988023	14820934.382688915
A0A0U1RR27	658272.3461304648	2055522.9844398552	1116822.202426687	1972752.2522564216	1642117.540483969	1217671.018715167	1035679.9918692452	1012133.6608365572	970359.8400450627	1506008.9899079618	1225430.897841495	1277226.717192587	1681633.3542991239	1412163.4273839926	1120607.542237973	1895697.2571523448	896732.3771706462	1639117.8847046643	727541.1952230657	1311183.877972577	1289988.419393345	1286274.0088872735	1289988.419393345	1007225.7321954796	1191926.2820740263	1252359.826005755	1268135.445912547	1239185.1434327338	1562857.3449686316	1799406.6456184224	985327.0155202192	1115885.1445878313	1162416.4297093176	1280908.8883326377	1627404.644051241	1400050.620701839	1771759.8402188288	1213817.2679249132	1252881.9049687658	1376893.1904320759	247441.68964851613	420401.8349387898	8414564.865299648	168197.0015673151	921994.7187186698	559137.4627679071	445269.3137157586	766721.069029128	748236.6864088144
A0A0U1RR63	1639780.7274536113	860054.0393432789	1349107.3329649365	1027864.9652551276	1026356.6277606636	1134923.4087510721	1305315.2677090028	1249607.3362468053	1094667.5569543815	1287014.1061095085	1270848.638148414	1303671.414912668	1517943.4294460698	1536950.721084351	800875.7530478012	1313527.047613999	1058248.561305417	1380844.538832912	818721.4879748542	973067.7358153416	1454806.114745514	1289636.5300169515	1250188.328475017	1175521.278432688	1173750.85157809	1111540.0190484677	1197287.3417643255	1075464.059134339	1206068.1671778942	1040441.9247288995	1398275.8695443028	1223294.7778831064	1245806.3902372713	1181515.5846493936	974782.3061305755	1136688.967909222	931479.4011436332	1309212.459968435	1298349.86972767	1275297.5854610684	1240719.2663126786	1175495.5935749286	1189428.1415509672	1328046.431994177	1192210.9774354363	1084663.0955637086	1306463.3814050595	1023250.8977172284	1061028.889812222
A0A0U1RRB3	1302531.3363023568	391883.8883752846	849442.3892336757	709619.7535250905	968422.2518695352	710642.0148747064	857847.6492194069	920035.2146543787	968422.2518695352	857847.6492194069	1196843.833429357	872857.9424136645	699238.335595284	1223218.4074089585	924982.8401011605	731746.1684944021	602807.2748734169	1004106.562039964	482959.0258341582	798494.1287966234	802622.6009612364	588801.5400114885	884182.564497718	1171491.3154329034	874345.135191778	951132.2012898246	978091.6414182524	799273.6888570866	933788.3250404372	553526.3325144438	727425.1556535065	833247.179376502	1036710.040916972	1013197.5435953257	801618.3009122704	793766.9546334876	618627.9286475141	876609.0432533234	956701.0835998502	879350.783223692	1106838.857881233	789873.8638484031	992439.7200654179	570907.708550361	940821.0883140758	796965.8850726313	625226.1438359261	747442.6232284475	975515.5785076008
A0A0U1RRB6	12877002.930154456	12217929.420891432	12332013.810036188	11892389.253140785	12877802.24753063	12834857.104865313	11861869.86241416	11167858.917290753	11033486.399834393	11977407.555879235	13046910.611372447	10928772.353939852	13021212.081464784	11736973.37459224	11311094.728868438	11081098.25094525	12693098.445782593	11862425.99891398	12177708.252143616	13213325.16822766	13806356.147751262	13074217.723306006	12054411.779764233	12143999.719527224	12001561.34047959	12386338.319173874	11537508.70285834	12019607.831942638	10501768.9963898	11546847.762190467	15480698.901165178	13914239.308346793	13210485.408669595	12215537.3020399	10249656.844038632	10889625.507244214	9669791.057933042	12314825.561970301	12211888.80344411	10915867.608513227	13962132.629744168	12909839.02447014	13558814.446710085	11101297.222786773	11051669.690497836	11386655.53344816	10960479.099916916	12219825.450529736	11849050.52179412
A0A0U1RRH6	6010547.865574306	8131446.72743425	7236231.221711852	6912420.335954179	7079364.784497715	7391235.417702075	6645462.579326493	7236231.221711852	7312473.568290788	7311553.402038973	4811096.222943054	6914422.138442878	7241946.657798259	6282707.464630392	8321404.21778514	7844563.659719513	6910626.789935323	6876595.164984277	8543048.353572259	7520553.351945197	6346976.752657035	6893002.406083138	6629729.388987077	6532927.607691661	6629530.617362242	8688009.56416993	7548054.295732108	7097325.7224014085	6444673.006264217	8456738.778672561	4737557.698830866	6339234.281121703	4834646.8377279965	7057105.489936846	10297136.773657434	6949228.668940035	10185141.01949529	7124577.537978487	6188795.150749786	7553535.006196718	5143325.174378197	6498917.223321326	7001299.76278079	7728451.1932210075	6747796.272158149	7775158.055257784	7785247.746426844	6933509.650238667	7679200.888202032
A0A0U1RRL8	1723644.470574501	1050125.385635005	1222838.2196496206	939338.3332564929	1094196.335716395	1167183.4032424905	848017.402109582	946393.1691390866	851623.2071162411	1132518.9010045596	773706.767840608	1493082.609634524	1297631.5138936979	350753.40141800576	1126111.3589344707	1263544.6256537463	1011093.5575408705	1143143.4935361191	1402425.510718978	1114372.0789102272	901367.2810490578	1169001.7800574652	1001535.4332434344	1072193.667970727	1229141.6283608463	969542.0078707044	807383.5505020735	607534.2084477604	1030850.5657767423	2187288.7176056467	580877.748497357	1383611.5580249077	836641.0247197327	914626.9638584785	1345926.9159839032	1140551.1911882437	1477579.4229111904	1134211.7595553813	627931.6332895504	1533923.8540618888	1149605.7337286859	1308146.0651606054	1136891.6894391244	961514.5802609688	1091634.0747407298	1117657.9736366821	1056508.6596256406	942921.1893392558	1172068.4675125608
A0A0X1KG68											4160241.6133177886	2828026.62901262	2326506.2916744417	2712964.194804355	2328322.198096667	2419612.766413985	1691599.3735037255	3023484.193004853	2037777.1705406448	2000633.63008604	1610448.6450705738	3204545.264742417	1911877.0027659603	2065351.1505414508	2428366.114393273	2775056.1556508928	3540213.4988252013	2567945.55771393	2786484.5048936517	2639000.0769189117
A0A140T9G8	289935.3775582428	362184.0250485857	506988.5159792702	300284.0411238274	307714.34316442336	360782.4435267161	413716.1456608845	515981.677415485	623953.3739413135	508716.4931980135	496826.9389887883	460858.71237021295	338586.97715629364	673708.6610307696	591452.210282804	357658.7372620643	126599.55769945955	292222.8706922651	416518.13482987357	435817.5419395593	226114.12976043942	402880.9129609668	351527.8063794417	206847.53349649388	335950.67854961834	627040.1329538622	570652.8512194997	380653.7019045557	461110.1038982753	627492.1352122538	498102.80604586995	612130.8091576515	82576.94816544378	194332.30467432525	809324.3239729513	626548.1428844285	530696.3666837636	224000.358314144	147845.67699062818	464693.1699140076
A0A140T9M6											1504611.299863289	266056.31851199444	824392.7607187361	368103.59115492203	306204.82562984666	264285.8021121017	342396.4491208923	249340.37541976874	631909.9046619282	573716.6220364148	1405807.824896988	346718.17710629525	352957.21493499924	444975.23708746495	263015.4116939159	573815.0016332966	299878.6784655095	501583.3457063047	470190.91576620354	672072.0616144661	1143348.393665607	423829.3314502223	473389.53218665655	387248.2243239594	369617.1980156504	578621.8885248271	604630.4213371412	442648.51372905116	478554.9899229002	429125.68772559095	957776.418036822	511617.0138585799	425974.0991844181	474244.22144427174	488896.71225010656	488896.71225010656	551440.6536223206	545266.2012870549	473507.9153736268
A0A140T9T7	1561789.5455255376	628453.5411499898	929269.8622653328	655587.2202316182	519814.5647693686	914960.1698389985	886210.459918695	473001.80047484	1071011.40582527	891136.7474753018	1301663.1032318992	790176.4413680956	521701.18198600406	1084224.2227582491	943068.2478780531	663110.7087841268	729577.5329835517	571795.7966278596	886526.1701803409	1039381.754987738	629649.5924997187	1122241.5959908587	807766.8237375442	839115.7600706756	804422.6185657348	966372.6771759948	722778.4670824709	921223.7987782764	1056791.3257935313	660884.6656050583	930033.0928711569	1081244.409882574	781676.6185019771	888460.8089368173	847354.3437923852	883502.9715237713	771733.7028109777	986473.4408716531	782240.5044055486	578514.2480267114	565562.8711243109	744402.8928955613	819026.2703305237	1001551.9881008068	943382.6106615264	1114611.909525683	785304.5452484641	574824.9773036985	662073.0601898936
A0A140TA09	635989.8833873399	602043.7254586995	557503.9448568551	481136.7308610111	534966.3036532035	484305.5045880947	568097.567530059	617270.6028834805	508377.47487782134	632590.611057037	495493.01577873225	544338.8161446403	552001.2752911802	512453.09905097436	576452.6957935382	516864.24178545893	613472.0703799231	515153.0226212192	720803.5390702893	575254.8423785705	448902.87735287385	749568.1662928077	514344.5102522877	548145.8477392801	535707.4834322073	591927.5703798257	505131.2125526853	608465.3160268292	503539.2998794326	616565.0996803738	615943.814367892	472273.33337073657	577787.7881277254	480438.35901767854	624982.3643039567	491515.13229503046	727233.2352585273	586122.6657197743	517053.58547008643	528943.2216275947			561911.6937630359
A0A140TA40	9169620.428239252	5008678.593524542	6385613.895743908	4690285.962317758	5935474.84862008	7947681.337640507	5915231.366512489	6310346.867699143	6122397.673877488	5837998.9518553335	8679557.496255904	5694557.858024018	6793958.92023036	5314930.221475154	6803489.021336627	5913750.1834681425	6399642.03009665	5142671.8526070025	6619049.320227383	5961723.136029384	8528457.098912848	6885355.276416861	4971626.597694283	5699792.687905228	4951857.705506845	5207211.843581407	4473193.590340246	7235271.804918699	6736481.958355502	8634081.50482407	8467830.485719414	5829720.167751111	7683918.653184243	5829720.167751111	6955317.968715366	5733178.584832091	7528192.340168225	4968925.700814092	5653420.214217828	4673105.992601848	7994242.383893947	5431414.06505328	7577250.127740538	6348409.643614927	6142846.5732125575	6581117.332682623	7152786.875624194	5174052.0893079005	5769822.511818787
A0A182DWF2	1180333.6181146735	2687156.059824546	2741783.4215849405	2438357.12231271	3261912.4263619273	3406026.633651996	4794454.365243035	1864663.5449146363	4245736.332618684	2937868.017787135	654270.6514226904	4101844.172083088	2111405.5199260204	3355941.1183254174	1900247.1786881585	3782077.1517584925	1251989.292163395	3480803.83080634	6277646.759850816	2642058.7060359973	1032733.4976608828	3084996.7674665833	2130285.2842188147	4760290.515002599	2574410.5970319305	3789406.047390657	3661538.38976139	3866733.1288818736	3431578.7683332614	1226316.5394136494	1144048.6104977827	2605251.9761271738	2713013.396309035	3957656.6206584917	3929012.9703585664	2281354.7650401923	4007635.664803218	2146387.770828606	3034812.4305427712	3739116.177629428	1781300.756924097	4506027.543061158	3581554.998328399	2501369.7750643	2569340.891820897	3181407.7268454493	2651036.945614884	4261102.773786784	2564765.912808434
A0A182DWI4	3543775.6279322617	2828678.239984892	3372797.5873268708	2613859.6761473482	2332403.5169969345	2722321.1306236912	3279563.4079198274	3849460.982922312	3378350.720269609	2897127.9102580245	3781736.0034389286	2370837.5125851617	2824271.7990326593	2900189.285519554	3342787.9954203935	2667197.090991185	2784752.1362678823	2678458.039498236	4086667.397269054	3381462.618486075											2667095.339435333	3532568.923078094	2599060.893602398	2916922.4665429667	3569414.870288256	3270005.2835096256	2620994.3865873446	3443500.3735228237	2820844.4832507083	3377931.995022853	2944820.8109014384	3103975.105806765	2567242.720750442	3523270.784180148	3280087.7699081837	3086592.77738077	3123816.3977661924	3247018.949975804	3490371.547939729
A0A1B0GTF3	920249.5851234414	566770.6040054468	640648.421891805	648767.24632701	735781.5312179702	855368.6791219327	584708.6761910411	644920.3870238055	649122.6626756755	746513.7111580692											971943.792650073	948790.0066489412	571632.9499440282	812876.3182145524	456076.5993703301	720529.9843304405	716278.3956912212	512357.5754320778	721992.8965503869	560375.3832514724	723107.003318883	664708.2774505978	676714.9652980347	638891.0801072825	720514.0096992487	772881.2069305588	613186.6216169947	755406.6847112841	835113.0538017816	592329.933806893	967372.1461072984	745169.9551681427	779091.1582281239	695471.3985540937	656740.1050797732	679130.7975472335	484499.8906660485	698169.8464267862	508111.3095521078
A0A1B0GTL5	1976073.7106025503	2281100.864222072	2717584.8349101255	2379096.339645614	2399157.2690769425	2548459.653945358	2401971.5721266614	2345757.6727489447	2738966.3219263223	2738966.3219263223	1929430.2753106637	2181134.29029372	2328803.0498002544	2272097.5249348027	3013867.0934450417	2296394.3548338297	2203041.194176557	2416791.2728029275	3706332.605438722	2179241.1010692767	2434662.5753198983	2525392.6963690277	3116061.4030425423	2767339.685833371	2130560.483368455	2428557.10551534	2507360.2622951	2350747.862424694	2055413.5090879363	2211031.9952692282	1904838.4547299948	2045790.6345610253	2100653.294519737	2208998.421733797	2852819.844981414	2338909.0599379167	3787024.4967160313	2272297.509591821	2588033.842895087	2427758.965216963	2093839.5002610646	2199471.5950787417	2061373.251107594	2900240.400997449	2667137.4034782858	3189166.6614495595	2233105.6949211857	2336927.621170954	2765353.64642098
A0A1B0GTU4	24655455.79365174	25932601.624663725	19107083.52689647	28885997.401739687	17976116.178850327	17947984.8358851	23013762.62540356	22183156.69661742	17403098.75121527	19263513.798521064	31739618.34412331	21322084.828166224	21410981.88238165	25160094.88422159	14742343.949605467	19250383.95816074	20681786.19785688	28975112.917083364	12716273.820666235	20370090.0522224	28673430.93349936	18373097.33127144	18984856.55646753	23025706.86176763	25855986.76589683	17755032.55050663	18793684.30557354	20162399.003088266	25642592.64614106	19101982.652273327	30018133.374181	17851442.90162125	21197647.0093856	22016645.13676255	14595526.13515537	18936553.68686852	19510263.93288032	27175098.668693565	25576949.347956065	19490509.204179768	32638733.2970198	22370931.734939154	15461716.061071498	26322016.69310005	23025626.83985397	20563973.245374274	14861578.881566253	19519407.205482688	17497817.837356567
A0A1B0GTV6	1200407.0615951302	1516333.59697703	695290.0571884944	1556498.862838318	851865.6408014038	584982.101717944	736265.5236916195	574156.4420780776	566381.9635787468	1068568.4550255465											865692.4047056759	601081.6007500904	976379.2769485351	968639.8433034292	1373814.3275955524	862622.5734833154	834864.3813036609	1302992.0241839106	867119.2276681815	697673.1916057729
A0A1B0GTZ5	7825182.76891985	10139753.666061236	9158108.919933384	9543396.10698015	9153443.594646754	7330842.556322019	7037940.536082335	6942364.186269495	6000598.339162666	6955020.03278314	5567572.345708992	8496409.11721673	11114105.92610164	6882976.456925673	7469449.228652534	8731775.14763321	6233868.668194925	9486695.550160868	6572414.029037018	9531385.737924343	8503774.19762546	8418686.706914717	6254126.621365652	9528230.526594693	7113910.3504951475	10074731.402991457	10037358.58521096	6788986.7840275075	8828562.36421229	4538285.416840118	12250747.132995212	5482988.419921899	9410148.142585233	8880779.881932516	7899617.260749871	7570411.314709017	7819615.065853445	6682363.680200436	7805348.834058331	6284629.232068589	9154777.714455336	10694108.020257143	9646396.29379518	7285461.683458824	6938065.005375394	6673822.66234352	7824707.795194685	9237321.13887922	6280513.700934082
A0A1B0GUA3	19945758.880599994	18859651.356408507	19009694.991509214	15497562.495818552	17200835.612795115	18659593.17627423	18687379.03462621	18083036.615470573	18659593.17627423	18612357.21707585	21789456.8445346	20188721.558268208	21808862.048635297	20182705.944996994	13788044.353681045	18163271.03825125	20356059.10162988	19114384.77524002	12099274.124811156	15724683.72293048	19921543.274014674	18786382.09296613	19869336.56875419	20561410.07182269	20509203.36656221	16335344.21265966	16418339.487689152	18310544.74718615	16621811.77485823	15881547.466933886	16683986.480778178	25031408.11636348	16001986.199034857	17554236.232631374	14321100.16683782	17354507.421746787	18954828.110352684	18121655.506169748	19696163.54696385	19495592.46203263	17304136.77835336	17059122.45228818	17601539.03597853	19345454.29272914	19306161.732122794	17599685.309169482	16843122.980625454	18354313.314086687	18986998.333695784
A0A1B0GUI1	8007392.55829218	10905364.215751464	10930007.022996562	9688563.66480918	11002588.81304343	11101882.175569473	9566979.955593618	8297903.93622088	9855833.373851197	11160647.63502366	8565826.283507956	11086436.43140747	9919592.183166346	9730050.796483004	12005312.116166186	10287771.19353369	10711885.092014534	9485565.772867918	9700808.886621134	9023925.93679194	8313785.849234797	9274559.19173969	8524624.497931192	9416679.19147174	7755373.6591838235	13046007.224167814	13519758.506964898	10520040.80388902	12731095.52789169	7415245.613696593	10468956.473316828	10500451.446620127	11650213.961170655	10858701.070591107	8989695.462378135	9311755.493291486	7991741.453879475	9681855.6137297	10858701.070591107	10205100.61159062	9804187.965695946	10074349.13142564	10749605.54811826	9865345.84364401	8983039.440924728	8952372.603371723	11510494.713748695	9564342.04320336	9641692.792700114
A0A1B0GUM5	479414.5567334526	806919.0923681916	1458485.8675930682	719689.3150640534	952218.9072943012	987876.6043650088	983286.8763055404	1340375.2025844622	1044861.5704077036	817719.9198124844	781973.5992802583	1167706.8946792807	1164975.072473905	801978.9434303928	841317.1831878001	1347797.02006442	589191.0076486048	1025484.0278640386	864432.6018486698	1005999.8313346219																					826883.7827728114	976537.6422342457	799938.1817474857	949624.0938667613	1102825.1141293088	941418.6134593664	1099619.84834517	982189.59423361	1035183.3218647024
A0A1B0GUS7	14024300.472557366	13298187.306203427	14117544.51304544	13668187.594523124	14574450.23101578	13960815.168395273	14127464.091820767	14189957.438105324	13855667.633376807	14731566.439238185	18766192.082451947	13683742.216342075	14662987.002889374	14578115.505309764	12276298.38990101	12842397.66007262	15363017.325030975	12231705.756435875	12241915.861407856	13901772.626703167	19038964.479227576	17668488.723181006	12520416.846522635	12407836.93074858	11944871.15478336	13513961.928450972	13587193.524148662	12015446.738875896	14899897.202251995	12951062.349580685	17344738.151936296	14142129.21255408	15986012.457973605	12265238.180642474	12034468.225081485	12664547.032231554	15803900.532500073	14318550.140356567	13753576.346563285	12234976.30052668	18420254.279582728	19594941.028578192	16645586.461410195	12228435.31426904	11658761.912357748	12538840.546985712	13062360.306214996	11414965.147731906	12850499.777756907
A0A1B0GUZ7	1747185.0006517374	2358424.314463558	2045803.9819770015	2201043.006601384	1800130.0006714873	2091786.561473923	2657196.316020093	1955751.5758740462	2266688.685816622	1844658.8879713344	3129354.2782348124	1802496.354799161	1792484.7630016282	1974625.476932189	2471048.20705666	1626268.9202343943	1970000.23861637	1713920.113685196	2221636.6219251296	2266835.153315163	2963245.433487792	2919771.2658494394	2368918.936428258	1859924.920627013	1708196.2282976897	1436186.4406546087	1882346.818768281	1948335.2190632387	1525981.7568209057	2355761.26799258	2288998.313410343	2122974.3862383883	1913728.750673383	1753107.53705056	2123120.4055235	1997981.8781828098	2583519.211480556	2026455.638779583	2108810.5155825582	2049964.74368256	2456949.84356839	2462190.4049126524	2337399.5379024018	2022092.4303559437	2034102.0501032115	1610795.7075204104	1882016.592758261	2250493.5622767163	1732442.2377241028
A0A1B0GV05	7306715.498862521	4483384.3117424315	3643243.76613052	3992643.6430157567	4413436.343200337	3345093.7373994538	3933149.6235996373	5098382.489592486	3745471.4897786737	3866771.296222511	8745075.333771316	3541453.4267847817	4764536.256371756	4347311.724295195	3622680.14290196	3338881.4635583414	4696762.01126264	3522752.3762712893	3209414.227357453	4039426.910914308	8385826.168577325	5853328.99809352	3707182.8068810543	4403639.830970054	4240217.224157408	2641926.0605664384	2920675.348290846	3343976.342395282	4154643.4260686687	4176874.341586385	6937152.209574033	3871127.8789854962	5274863.27598308	3768819.852783239	3379257.6103274887	4037641.304944669	3731583.1951207486	4557593.704132195	4436481.784359512	3833767.511496884	10556681.643674016	4689613.672741641	4440665.214174049	4578494.3126244685	4220309.872924742	3429461.915480652	3400355.149348265	2661728.1546711046	2910162.964424596
A0A1B0GV11	601871.5187702287	858160.6741585331	233356.0896444403	300053.3370542869	928546.2486140856	1283478.322759721	769571.4210580456	520569.6860423051	656472.6398473842	439604.9584744728											589227.5239321218	441142.0628675683	680436.6515488562	819179.1516351326	644222.0928324532	584664.2449044639	689878.8756070131	532633.4551664258	874597.1175586487	735798.1645359476	585181.5156418168	742624.0629146863	1126322.0181015208	418177.732864644	442561.65430078	418145.1340391946	1316601.3622495509	582718.674379116	493318.0255254644	466130.6051006817	1115201.4268518304	843173.4276534626	620763.9219634988	398669.8061137362	481719.6226834632	491871.76591804647	627250.7238119604	850384.7737294134	816757.3975241815
A0A1B0GV70	686611.0219206958	650840.490691242	658625.5422959453	730370.1355157602	672414.7513474133	616647.3228588196	821195.737570632	631657.7164757312	715904.1866842755	764515.4736193693	1075394.8265495657	892322.297532242	836624.2838259584	583565.153471731	523594.302502829	582974.375329311	856738.2187213702	601755.6246476361	460985.55843288964	534819.0872088068	618211.3782418093	474253.2080075837	660838.922859135	667906.1865318264	694458.1947669032	749926.2607050344	777921.5833521396	759705.9600830899	910457.6619463463	635083.2260237982	752556.2543008309	686806.4323611697	686806.4323611697	670351.9520647735	627670.7496818812	691326.519809378	561282.4973116822	748504.3491683505	753909.7268135713	769564.04097036	717069.723727808	732884.4047152204	562750.525049187	788189.9485161281	704097.101352626	755964.6710258354	660893.2264812165	588535.331006925	646293.2963522575
A0A1B0GVD3	8788673.668959143	7827038.940993583	7969346.86633868	7610124.978030927	8858951.732018778	9683740.026343292	8163796.58040544	9192453.085810864	8367108.337614619	8895945.609787706	8084233.449828283	8035112.294170197	10252913.133095086	7810005.895800075	8277494.89951718	8135481.8996290425	10094258.246665357	7647042.271779551	9537755.52040375	7482879.627424066	8465863.75190948	8919111.313023364	8138635.455520122	7904040.523060312	9242225.351188414	8503664.169565469	8036190.068284132	9147092.51283372	7636041.817267617	9364316.23208278	6336789.905329413	7749350.142533352	8141437.551083667	8638193.148829728	9748456.782714266	8154079.534858642	9324578.503200412	8624807.518950345	8476078.29806829	10163411.3089752	7984822.066578499	9219533.454568677	9046074.895585194	8166621.9120020885	7868387.7576172715	8508413.661192598	8663682.185891021	8254758.15547168	8892565.075859085
A0A1B0GVD5	69246389.45551008	92382300.26674622	81161120.22051977	97689587.8995935	94980594.47814904	93668562.34293874	74339897.64224452	65774075.68158506	74339897.64224452	87636831.29273261	62968298.87308319	89412521.19876309	86924185.47949466	106797358.29466204	66910463.58736237	98737496.46996091	75584445.82975544	105440084.26597016	61424131.56193435	77020274.18741654	63837660.18521059	67261500.25180683	70166657.87561557	98075163.07662652	79852869.87916748	92115749.24110436	92551033.86960085	91798807.62098034	90400455.75193541	85159356.77194493	68803001.37096703	101394698.8810644	62793401.94057089	94939757.44986404	74656836.74954747	70334904.12459148	100593074.28825805	84444593.9037561	88494077.11821604	84764911.06060347	80370972.61557467	92896104.44292429	80439988.35754122	79149254.40260059	83949711.38477801	85831100.67576273	73299461.85954992	102099929.65077963	73721986.15841913
A0A1B0GVL4	5164933.154067674	5751818.4112185	5154826.888876885	5658064.754671805	5836686.675503259	5446645.296260921	5216276.590617308	5067750.58611696	5511790.101211727	5203102.35206503	4613091.074615631	5573111.102016519	4987397.111662583	5347191.031207869	6181275.553744951	5102207.150788284	5685463.843401559	5632983.462771287	5713250.725210134	5175926.083008145	4743953.551084583	5503821.123624181	6072956.835673977	5298673.878313043	5719099.936569181	5625807.917819801	5969057.2696032375	5158973.840032721	4944001.014029684	4975551.667600903	4534032.09859758	5652018.988481202	5792380.143798186	5681003.701242645	5645041.187260855	5648530.087871029	4695318.606266504	5151227.562436287	5171355.835187288	6040986.6770205535	4768359.542611147	4890478.02702212	4581922.262463419	5472147.650137541	5676443.610900258	5277033.53030798	5834577.866371534	5855259.963073468	6445652.335075388
A0A1B0GVW0	11170140.734121978	4578710.034333853	6047916.100480249	3805479.24320979	3907997.0676597706	5026648.884094893	4885167.44205472	5863652.8996531535	5842587.124471705	4204125.45013038	7254334.858450582	3872634.0508593414	4768772.496547418	4948841.442160645	5617399.981279478	5037523.895631453	3872634.0508593414	4390028.8162686685	9217767.382781688	6352487.8866779925	12526837.094086455	6123358.855416534	4785539.567961174	4054283.3335795063	4233472.0533850435	5401770.191141211	5394688.849980514	3967583.087020675	4969993.110977492	3874897.5677590617	9427894.144339757	6146488.18774541	3487500.45579464	3788424.994353192	6462314.6607117485	5722074.129965883	6626012.03701096	5499037.698659242	4145325.079518616	4027353.5052920408	9170646.009857344	4811859.175229054	5302351.3683387535	5713552.424161862	5321548.169997614	4729507.678257715	5074215.464566802	5208175.754403625	4947627.8594250465
A0A1B0GVW3	3923537.090384544	1729694.2206470126	2431705.8962555747	1423208.763469781	1833590.144366335	1637225.3449778613	1823065.231688545	2506282.420372484	2058823.2756710309	1756006.502341486	3793302.0340039767	1784347.695819831	1848470.0620001918	1867066.6923934256	2325487.429303722	2073830.5308589125	1541440.569185084	2196865.783695797	1533902.30424103	2158434.093668521	2659209.837200984	1620304.647506386	2187177.202780438	1720689.887634265	1613017.0651701794	2283715.9507745714	1671626.601521764	2123968.2849941486	2071024.7232536275	3172414.8987143617	2994599.012079159	1433842.2693803138	1562337.972202486	1859942.0093087603	3142152.691550474	2367350.234766522	2535210.2299688025	1691083.3428410224	1621176.3542590116	1915451.4871470954	3479781.3524686154	1492080.8538347022	1878635.0926698297	1833310.8149634583	2038531.58783778	1607888.4848947471	2825124.515699958	1656670.46647141	2426738.3328238786
A0A1B0GW72	885529.9317557968	906712.2560388878	1286770.3550053795	1930689.703913649	1083590.9767374913	1024735.000049948	1281720.007170805	923815.4532248223	1028134.2726309116	1421187.305064059	1254593.478438717	1136536.8611078085	1033479.240241072	1084947.5708499877	1445051.7032179753	1085431.4094456062	1055070.5375705466	1079685.8261226371	1353054.6326470778	1245037.666175252	863950.3215497511	866535.6047544944	1595461.907162406	1169365.4142630217	1457833.5953804946	1126404.0904194969	1149595.6015208687	1426468.0270876558	1124883.3355931777	992387.5713500944	954553.3061082772	1122696.933626844	1903952.7845531504	1064072.1439556195	1153748.7452988552	992047.4023595441	1261528.1663097986	880467.0334468399	991532.0195932034	1448289.9962624137	1152713.4380632783	1264444.9025232366	1010260.1116396756	1299972.4188722554	1272268.393442284	1335256.791993443	953607.7395549478	1407928.0120294194	1197766.4479261646
A0A1B0GW77	119101493.4335222	109784717.00132445	111618300.01657224	107530379.55949448	112820789.34285104	110518150.20742355	110932578.34618849	114705542.11666386	121587874.64366367	104232798.19701605	103266064.52974056	107253858.49885514	159087605.93975875	110673590.64900756	94351281.0508272	127377977.33901508	120769942.71136229	115515527.671024	93919554.06841594	90617221.36084904	119761696.81552836	125588613.18423992	107336009.62685592	110405885.2852338	98857305.42752646	111475011.14586212	103103235.83217342	146374595.08256155	99193529.90439644	100736741.77940749	114140616.10126628	97908745.0120193	170421025.89503792	118201813.61272708	104441886.2890014	97908745.0120193	112354621.01974432	98858710.36024363	105870682.35421896	102725777.971539	107571640.65957312	110983630.57061552	125333760.08362912	106677717.09054008	111722000.0872264	128424181.56514326	111118062.48613508	119453501.90043342	94870405.669914
A0A1B0GWJ0	30237291.275259703	41744793.03499145	36611141.38081398	37372017.8500701	35858794.57832629	35205633.45843808	35702316.70920249	36359025.56659617	34152257.35442328	41461728.87232176	32648725.70217764	41186642.076293066	36973841.86761582	41174915.52894312	29529578.32670648	42973227.25290563	41845308.53458604	47065497.21069611	17983878.70373879	33323382.906856906	31390345.474050444	35795490.81648687	46315333.94713764	39435648.3890601	42026217.79820946	32588464.237880547	38809333.01225575	34815473.904410176	38978472.98692889	24550218.771225873	36441300.53928998	32201420.38262544	41737535.08717666	40193465.31779768	26844409.50976104	40789524.73607987	29487452.33676333	37881958.59753081	39848202.28869452	39279730.47322202	36508830.44482814	33017730.237748634	34300788.74842371	38119356.44546408	37534382.512426294	35208056.06350358	40898608.45394533	34794685.74834884	33726365.063728176
A0A1C7CYV9											184734.37087051352	117534.9916711861	56266.79254531484	181766.84380567522	169610.05538601134	62961.161694192844	59207.20121661021	147555.05332318586	131989.09542955636	88181.26768909779	28315.65688801877	57491.137379473395	161610.82389187184	231648.18317069468	177195.68941592923	93252.59657159123	102310.00542035015	101000.01239103165	136189.75641227848	110786.69570972047	83751.79976267405	139660.75160963857	93313.31601464954	137743.8292692666	168753.31998018225	133024.6590096362	119832.0248036765	115582.46202502074	78160.13472964814	130020.71082805745	44223.5339825855	77558.86944869066	90706.2485995125	152940.39145548682	125475.12624044885	139009.7517483862	142512.5046465211	136854.32391161146	159004.81553861575
A0A1C7CYX9	178496913.95217526	133173529.47040288	159482616.20636395	153149389.53905252	159636459.0474113	171257921.95999518	153397178.12428525	187214080.72762853	147006371.80731183	159725591.63202742	172850196.50913438	170973168.3232134	251795582.12480408	174775437.98561266	117134614.23539276	159463605.55141592	184561814.0048009	174938137.50380364	81949939.54037848	114097556.56249422	189586689.3132796	181060257.68684772	180174791.24973592	143380055.75490648	153807062.12015444	131688905.64136338	140837357.0195857	183117760.6151074	124295844.27202372	174591328.98867548	181028138.96702087	141363417.54645467	183214865.27784663	174586139.96521065	125895137.61135076	155903979.34591588	119136048.33738244	139388409.76729882	156916896.08585232	225107019.00906783	140425202.06038922	139865607.95935157	166737097.24251246	155369656.28810057	171201980.07241166	168537893.00451833	210822578.86825982	153427535.58449933	142724963.742937
A0A1C7CYZ1	7811129.762757379	4710784.49239694	4605881.957521439	4379801.686507109	4727381.974873401	4585417.100487354	4271273.487983837	4986737.781143939	4010870.2677706107	4378351.421048	6310778.196036758	4779963.922099294	5782070.844799824	4636805.7902849335	3330579.044239725	4627466.217974924	6229348.799958862	4568802.029402678	3412300.301952306	4789449.4252266465	6531252.757482195	3228726.645647978	4219017.67534586	4682116.735249472	5277254.599112799	4646847.110847211	5286294.292762118	5294726.400444845	4404479.586856059	4896920.6031951625											5792407.529610032	4423857.660136216	4486818.611545022	5047962.345094332	4908605.936563951	5006246.46066766	4908605.936563951	4881873.056925239	4248843.231693093
A0AV96	15263158.13990188	11818812.046689514	12483640.794512207	10509642.466663918	9053936.567101207	9894926.00851622	11955398.150821405	16270177.864583476	10786188.18713818	10772113.235949747	18814321.467929035	9887747.052115316	11252334.541715968	10812988.001078537	12380099.546586405	11444242.417273212	11126083.658477034	12104078.857487053	9468358.930535836	11517739.050465347	14822207.243245853	12548848.779178552	12530378.449910365	9206611.46807485	12720435.461220693	10374614.415517183	9588510.063571658	10694945.246786699	10632369.198884383	15689072.440701695	20352913.859976746	6934359.2118411325	10142421.95697838	9518046.686570788	13691080.468165046	13762430.893511295	11671945.44284922	10924922.891870577	9827109.419180367	11982762.65781447	15323917.750634255	10396835.748331504	9577880.10793754	11145023.126980027	12832644.796506213	10265011.161899677	13505806.31067014	9929880.29115591	15938393.389204407
A0AVF1	1018539.507178209	2114895.8116571098	1857889.8515224182	2305529.859559108	2733193.2930841465	2475058.3709595324	2291871.7879327782	2260476.6444834284	2069579.4352784185	2346951.44865322	1749254.7609538578	2036599.3220883328	2072004.8580469184	2376596.601220042	2213956.325432639	2381673.1302729268	2364946.617880728	2136958.3964415286	2004447.9714200585	2137544.1497937846	1496828.289834541	1834244.7906696044	2059873.9311690438	2322610.6707225926	2641936.293637912	2498053.035195409	2527437.066297757	2158371.994086285	2048058.760003728	1886569.706389568	2188497.3512304383	1917906.5210732876	1842779.000060899	2723544.1920539592	2004315.5222230856	2318467.6880933023	1634030.4442336385	2088514.8904019315	2457907.8805459626	2298018.2897906983	2102951.3561487743	2479384.654371948	2024604.829375147	2000556.798240464	1841361.0084212744	1636463.0779841358	2450722.883327263	2052461.372227992	2044844.3487916675
A0AVG3
A0AVI4	649884.6151693962	836364.3560032061	902801.161629712	842301.2620379152	861177.5786610927	737459.4159084926	831667.0237559638	867070.9908786975	761750.7127611302	843910.5332707666	1241924.3790980058	889075.7252528719	675832.8225443586	614465.3541839279	826231.7034003785	724816.2938745875	831299.6160311996	641586.3076800698	964522.8456214857	724559.0877824218	628773.4727296154	830554.5037446255	773754.6987904777	711985.3710438416	1064582.215990895	752367.3451428046	745373.2019533761	777196.5534652754	1207870.123174317	641933.505309724	725036.3245777887	715271.0657382	808058.0968451317	862654.7712664688	806077.7296678723	818591.6015724505	1014152.8603268022	858608.6762577579	783918.1038395748	742023.0947620384	1038995.6564442662	887465.1735329174	564974.9216277157	731402.6862466654	747062.7805718242	748408.9204851616	768690.7618461121	830568.3265291888	1060982.6083621108
A0AVK6	994288.454872968	404057.0976288879	665081.2334462815	462691.7963807339	542566.5593769293	484058.58474379143	823376.186945674	768774.6210153233	694393.0730779129	473997.7916672203											144730.97174872953	370756.20286024216	995606.7976782441	571400.6159159532	1035216.4110355664	603599.3983870668	739876.912007666	532271.4288367713	747019.4197066153	572857.2275039321	57578.91625897193	229335.88450314128	92848.61401496813	236227.96815260747	1426060.9597208945	545171.020941394	2306264.0915583232	484222.9083896693	260011.4201581641	675616.3114776311	306935.78612557054	1401361.5981450465	431928.8358917564	820787.1567603843	179004.28066154485	799751.0341892749	759884.6434613247	1006239.9388300648	212583.1812524737
A0AVT1	77623149.27476457	61349709.148275204	61416234.00446804	59791340.05359595	59095976.82505931	56146167.34802081	56886053.55348261	59376841.52279054	55590765.92668402	68239583.03793195	98977611.49681586	68044397.24959894	79861185.58744472	58356827.99162499	39017640.49856975	59339324.06318101	64405924.48894133	68453318.83700362	28938172.56321224	50121418.28674082	92450466.63512936	65314660.166655004	65799389.22081532	61543182.35380425	61136334.6886317	52671436.95854306	58678411.27271679	54220087.47250471	60433452.30251863	43268400.52008994	93190018.90661949	57454641.2577303	64842444.39815769	59467803.28494141	46041158.84787162	58472685.11561891	49927851.1303709	61573384.49418463	65444125.51243627	59101708.69565141	82040184.93936343	58528832.90772941	56613820.41326757	59781772.33218333	55463558.08495959	60971870.5852812	56059105.160568394	56756233.84439141	56881717.00747956
A0FGR8-6	12181008.565887915	24369221.175368365	15133637.28974162	19667039.007613894	16059871.465924375	14592304.871217027	10596118.975530753	9435341.722956827	11374155.683524268	14088021.819739748	10796473.850439353	14076892.564018713	14859049.575302444	11267032.657173445	22196243.096479505	13348674.415107684	13348674.415107684	10729763.30188734	18426033.601792186	18447883.72349183	13538150.762237635	15365098.442954825	11911655.301706467	14934649.08839014	13314820.84300864	14195067.54904292	15160288.565808233	15031737.685471546	20122221.81709563	13923029.919137202	10921196.414220652	14619832.91153408	11362475.305134153	16486054.25297032	18051251.972955886	12174075.806210967	14441262.227443805	21585653.48552944	12565240.480633466	15289674.979908915	15734755.102772042	11567872.991289567	15314033.527764214	17981234.461423334	18745869.84621648	16955889.622625127	12352756.326262847	16089412.959390204	10923693.78636023
A0JNW5	6779498.954906355	9125605.01423611	8957613.361837326	9783246.998298738	9952466.475743167	9233873.997107064	8721493.160752079	7568124.685184341	8930066.005044047	9154403.80809514	7164584.931929317	9641265.251356872	8891125.858335657	9376383.494395314	7713873.605173177	8005315.321504865	11136712.996140895	8089302.220053651	9623319.33286354	8564510.141757043	11606207.826979276	10068246.052348228	9110464.810205353	9214351.898837904	7960348.166469162	8069141.034287139	8476032.131431295	7579284.553860044	8172162.397181083	7950147.031515937	7864707.794439692	8894076.484202085	9654922.296533912	8257051.517127548	8156475.380789109	8097526.798970902	8539734.141443122	9810196.952111837	10477784.992261237	8453914.676114723	7304708.915006258	8858150.769497698	7890277.279539078	9257067.62432563	9137627.91705414	9553019.214264346	7191878.597119085	9244515.668224847	10180813.143617447
A0MZ66	12395879.478612812	15400367.4050292	10925823.752579484	16202422.538398234	11689018.216549873	9836725.280639283	14627849.7128324	8865776.57338801	9801886.247461785	11190297.45661392	14694552.461615302	12315414.71489278	12112966.961723428	14515974.710970802	8631242.254193224	11364381.08372513	11232554.6398009	15296886.316254236	9061561.431860173	11710510.244597325	15057183.217841495	11356473.756859513	10192690.308966516	13571902.708209788	15059647.499963515	10624595.074502073	13056893.960474072	11003412.91134509	10352606.489225507	10660641.754478484	13147984.292418873	13134069.60907416	14001650.115616988	14760696.092071055	8503262.99195383	11357164.54595437	9899810.185845904	12815423.360480245	10548721.443626573	12767264.641424196	12422855.551961532	14491553.227137873	14141830.697523532	11617663.883778283	10866768.120192783	10532338.541873446	10636781.100717593	12412778.801108235	9515416.555760972
A0PJE2-3	63458.258512064815	1435189.857304559	238472.09454952445	1250960.054456901	1192957.3617897336	488240.31422100565	260930.04475896282	290073.152240048	298354.98769934237	593068.9522418057											511797.26239445154	2781618.890271137	108912.67261054153	593289.4775292459	90764.40629524684	531256.941893369	1091011.1614719112	115027.4730854978	173979.5337651232	114023.72281885405	321544.1432647633	270928.5581537056	1024791.0311289745	379357.2753212208	227385.18956860038	327918.0903109382	593045.6404787991	850939.8350099897	1559772.8787124215	556019.4537049514
A0PJW6	2502778.271253459	2714625.730172881	2293511.428103327	2348996.112056686	1656449.0021909245	2309549.969558596	2425981.1110419733	1987912.1922664638	2495943.8297144133	2187917.1389545896	2676718.009402235	2142886.135087645	1587683.2587019796	2750795.1222262504	3103350.1797796544	1773448.4783174938	1694292.0593560785	2193605.3335512583	2270176.5506492364	2730711.7968928674	2350168.968166783	2312146.44707108	2075589.2975172084	2221913.307550531	2354710.7390585053	2073318.4120713472	2167283.702455094	2407344.926986079	2221913.307550531	2739280.2526076217	2446486.533006826	2253341.423133063	2594606.2923166286	2117937.914346173	2563825.32538563	2383396.4660347803	2405106.871433984	2087866.4377876974	2410080.398945371	1661026.1144413578	2808893.3267324264	2344474.8487357255	2654812.20002435	2056519.956199321	2125631.9369859584	2336125.27948333	2316444.151959826	2111107.896353639	2220213.6122147767
A0PJY2-2											640206.6085778616	1087662.0214963444	1224133.8281425738	1207874.4918038629	1710021.4381726747	1531918.8764465563	1324762.7465086426	1218612.5078402013	2039194.9389859168	1485044.7709829656	609459.2851262479	942724.6763335052	1385631.6482466715	1637300.874809817	2064059.02446212	1167313.0755214156	1096013.895106356	1938823.2599901212	1480000.5747486781	1148101.6841807174
A0PJZ3																					1026194.1325733608	239636.78420703788	389385.11318255786	871206.0337266857	393667.4500207775	795597.8372470088	732871.4670286427	686566.5239812272	2380317.7828637185	1076734.9914634596	628151.618078232	395827.5188126011	2440540.2573828786	1015673.6333971219	333344.5771445264	350696.69059754186	541799.937138999	1348200.4378899594	1220500.1272497266	317423.56583196577	114323.39091720794	400010.8313056713	176350.76993898788	854843.3112485186	1165343.317071088	1508837.9830757906	494282.44170133345	1112571.226684404	1471324.611790211
A1A5D9
A1BQX2	445756.4563685174	316205.09339919314	485340.77995755896	408079.45748910354	222552.51581076844	287959.0816224612	553623.0045622288	898995.4942901894	392057.92992823117	315119.38548755896	388382.28718982794	428460.1173102516	354822.8251982889	625266.4537352095	361105.8259724695	313855.8295156503	350586.2128136177	621696.7155221994	390271.7640095347	491263.9731237571	560035.3406198897	532349.6448065779	346585.48303753947	355285.4772327442	514863.94218764454	378921.1757482881	378835.4615197639	352156.9078916115	381621.17394679994	525042.5068248914	370901.6683040321	439764.2906574618	518003.4370367075	422953.212033124	418098.2884648885	449087.6762163617	377418.3766558229	459357.89264031063	384983.3620367749	485145.5075576785	412967.3052323585	444881.6873334067	388864.88132312935	437896.25031546643	418512.99568934954	389664.7405236569	393824.0083664	421232.51697114296	524867.6073861587
A1KXE4																					352948.17704666976	375098.14250632713	199993.4284598188	266530.9343324402	258668.93455449824	198671.6678382365	188230.9016602622	270122.9235720717	192512.33952383135	243203.95437114337											255090.03354046255	248093.3607698066	259045.19735755172	272834.1727320231	247348.01074956488	249415.75596700964	274312.8509979865	185243.52357910306	241337.12348955122
A1L020	9770078.184739098	10341205.124610832	9929993.727903184	10573463.413492002	12352523.831192447	12449807.690373736	11052582.755228633	11686209.068008762	9317174.521420816	10234594.76250144	7033165.421482038	9014865.053509263	10753926.99130181	10603039.052136276	12260239.291364536	11512692.711850353	11079453.220737824	10439173.038808113	13508606.42510332	11502471.884213114	9215916.852754032	8780711.008247545	10834857.971639546	9415536.425805096	13373667.188297465	12283199.102983614	9838518.869142376	11339622.883231224	9028608.61901008	13596994.883328514	8571456.682824183	10362070.387736237	10993968.764610788	10993968.764610788	12996843.50763982	10645702.867869353	12105592.70819942	9486610.263360094	9733071.082697267	11818350.949819865	8797598.564970437	10793510.521080738	12517600.385228155	10310668.172407525	10434460.949542884	11558001.885436188	11892381.90917919	10190122.971042333	11502071.413838888
A1L0T0	14889693.72846872	22579796.91466669	18893857.89408129	23741926.767541394	19900219.57883282	18857373.482549515	18518575.183241926	16708847.025678175	19398558.92027088	16050100.70635442	15811901.244751625	19940490.27313048	16291075.508722972	17677501.289610114	22054435.555084366	17594705.206927635	17718361.69405082	18072834.304764334	25707635.28327164	18670009.223192614	16294859.181817768	16568867.406391203	20045391.70452238	19027749.610634167	18919647.61258641	20821208.954544928	19781991.4099029	19077193.351944987	20332984.37227668	18669057.74185201	10305798.78213722	19962961.897295166	13998850.793456178	19192941.677845813	24432916.75732724	19118917.957291387	24743260.7677662	18552360.772750385	16550802.082972888	22680140.5048212	16402163.143391555	20106060.710209254	20031732.725898154	18688828.348803405	19234604.872134853	19245719.974375874	19608435.99175996	19183211.730689168	19245719.974375874
A1L170-2	3013121.9321047063	1797290.5724372806	2724651.693430466	2749431.8554186528	2156894.452583491	2420292.997952036	2118703.849989933	2737333.3057420673	2540258.135106609	2474299.174520407	2119716.5327904783	1800440.2448726925	2608477.4703369625	2287508.1180958617	2553675.651450712	2649467.448690906	2928912.17068649	2841140.1518198918	2575596.379005212	2367349.4672374567	2412229.6079585785	1595836.0538558885	2729519.52008302	2093121.889045924	2907168.8198401937	2988018.2555734036	2074762.0404849737	2816113.2252669823	1890023.2942537689	3225483.313972537	2631825.3184013558	1657956.773642412	3786431.7351227393	2326459.039906445	2854602.9362769774	2220787.9074730463	2257635.156057037	2404600.6188000804	2026641.0252787785	2565330.858313005	2384445.4292535544	2000902.2798080302	2536874.9692154657	2287854.127737675	2448134.1161096427	2444734.820637968	2692562.7018181533	2416770.805059666	2762280.3278126824
A1L188																															85646.41779633032	182047.92284023046	173072.57253535933	155072.58690258837	171325.69227467972	197512.4678438646	274512.10215551424	247334.15001208798	116159.32316469048	226240.16015585623	28549.19160236645	312754.961950967	293949.1344332242	239179.86377451054	213285.8244481166	174872.58002130958	60418.22421193598	182474.16930530145	233397.6122101471
A1L390	4230196.419880067	5800885.229604685	5529776.7959488565	5827891.666641517	4392130.635772308	3976558.6452351813	4323001.117379935	3557610.8500684486	5434398.13442419	4453834.776063936	4082032.8200522014	4688796.76451607	4225862.4758741725	5270510.198631612	5048756.736232668	4682859.236250394	3638611.6357346857	4682859.236250394	6369946.088345974	4836048.8945128415	4556438.129982938	3833662.838546754	5903368.164332405	4246952.863408011	6175358.332385789	4473008.52169706	3957119.368727013	5065069.389284185	4148814.566956126	5166486.9998189835	3936055.3837949513	4153133.694719587	4045888.593204908	4962932.559255435	5831804.83425936	4394728.99949455	5345082.218640585	4817656.277911134	4965519.449217586	5073483.131277308	3717604.184341575	3995056.8067884864	4200560.008835998	5252596.605222624	4788084.809610379	4408765.974085041	4698334.431573303	4837946.130742088	6661286.105734156
A1X283	34736990.32802946	32261136.353962854	36930834.07418738	29574719.913406864	38481938.799707785	41455212.67043971	39871146.969502	40946692.68058237	31037605.55766329	36329780.99304822	36504009.41757453	33471164.51881581	47123602.29456719	36896653.32864337	37625712.32617776	34027819.59131788	38746671.11123984	35816486.76280986	30103755.34299491	31310185.42458543	36848789.86710315	30282605.41861549	40239965.87387464	37937557.69427051	33567483.67932121	34566642.48512269	34541945.17292769	38926307.479572095	41416613.83911277	33298149.38086839	31046093.56051539	38397360.37344737	47520163.16287229	43868024.71508077	31046560.241201386	32884895.92554209	28955122.700674277	37080998.99017879	31812334.96961482	39014505.34958857	26272486.299550425	34093401.13820999	38807963.82232283	35436031.713916995	35519125.16163523	39653024.18561725	38245421.1812704	40864526.65334906	34190460.932620704
A1XBS5	770869.9365876677	702073.2513748113	521119.4965993197	535589.7513816821	439386.3476332568	549634.5750756655	499691.2044109704	598122.5235959064	428308.3460029685	455569.52232409216	737194.6022855791	427448.3340641406	582879.1695632947	559055.0325816086	455739.4967298928	383628.16574759857	648612.129326401	483337.5935925412	729397.6120006634	493073.002295512	903966.9745984076	814026.530691166	390728.52316050493	434248.0927930411	509775.6039617654	441185.4865543568	468186.3378209949	522948.46294193633	437629.0486058914	577663.7928267139	640706.000209506	575370.2915230226	375306.15776383533	450130.18144181493	451127.96059766674	471864.82361975615	754697.5622601205	659983.8465414348	573195.8860041379	547978.4297916198	1062342.062599742	580337.4063836719	472222.40373920725	671368.6551521763	437650.23446396354	517456.5244550606	427252.1927124781	495340.8925064696	329060.1943790758
A2A274	129345037.63115267	70010151.89171845	73255916.31905091	66867510.52595623	89078183.22387972	91338156.44862562	81500262.99341449	101162338.55407338	88253102.75186951	85401142.00109054	125665275.30676286	80391065.49168025	102656014.3906246	70955658.22564174	94005355.32348332	76274984.25236641	88529115.44121082	72914844.90551509	84407845.48831558	80411641.42484787	112901367.42676952	111704804.5721588	68287153.15850773	76254551.26342091	60301169.13023406	72193127.09899871	75261507.04126218	94457986.2991167	83213146.31043296	121636988.97659191	121769856.52991796	95907642.782137	81880653.03723414	87661617.63164705	85331737.81574199	87252717.9809831	86176396.5582544	70720731.93192624	77840957.74171606	81669488.35160603	119427613.05186664	85752454.2881387	96727651.91037118	79639407.885921	80272008.32430291	86045471.6613195	89330531.61416161	83351013.77750611	80344193.02162865
A2A2G4	6943118.803378702	4503868.607438914	6631653.151454754	3002557.9846179243	5037475.345324258	5027669.886596075	5257623.7090279935	7118130.426420768	7425579.003317363	5885173.067631745	9397944.011426292	5583892.275746407	4588765.835240661	5141831.1112192655	7941235.250541273	4932336.688500098	3130870.8703798894	5701227.774195605	5654114.806241873	4760644.370502699	6891860.500293244	3817857.702373111	5836170.221931498	5788602.114047107	4127624.8976782113	6920585.203121982	7596420.011276508	4475768.295962506	7758886.930475845	3619082.7587982495	7206836.173383265	5917051.498206372	6700141.662695859	6806553.063771168	6475211.5090659	6164208.083313542	2869932.889004736	5470338.36182029	4913103.989453067	4309495.128621397	5976162.482661357	7666246.068155047	7169306.02056293	5065028.359904309	5773649.548740705	4223178.031732147	6121229.054237759	5976510.642433142	5719069.7018508
A2A2Q9	5765283.802261177	6085479.027201452	5585393.580787785	5728535.394749543	5892497.836196648	5945850.694127847	6062836.594811138	5745452.1545813875	5503021.973298882	5499508.4924107315	6686921.343354805	6517198.928763008	5589298.265413291	6492698.180910514	5565527.327071298	5955975.415188679	4909428.577131999	5604311.489629286	4992762.397380923	5499740.212624818	5944898.783156237	7467024.611141326	7910986.537754335	6751878.166652718	6619367.549963502	5572430.956710431	5614546.734107778	5471353.090956798	3824712.4807034936	2636653.107890491	5707739.55675392	6337574.851094503	5638244.4290531	6067591.03991707	6136514.974787473	6093294.717285866	4258851.823116386	5577279.114286518	5737631.98154578	6259131.035717137	4785612.6947617885	5452469.198222701	5839831.01933911	6683884.462000224	5840430.894208063	5509211.46041721	5839831.01933911	5314792.99879062	6076929.102789645
A2A2V1	233042.4382064212	135194.2867403002	97149.53121458757	106348.03119311162	62813.84826086042	63983.8493810361	135851.59074039885	87366.96968169008	66500.3846956997	39235.414771605705	237843.36762111512	10324.84668585439	106990.40906626538	146027.76107345786	69585.55602633496	48001.14389413182	73278.42358215188	133153.33286287522	121196.75400119474	81095.86227225847	149009.22706646705	72029.56925851834	64900.63123440492	69453.80683248438	106510.934933084	96141.13710499725	108805.40169389627	75455.17833414147	146446.5758790663	138746.7030090157	257652.90369750466	78361.68533823923	80632.94570842605	60133.956174455656	82783.78956716474	60196.72648361479	158962.60537872696	96980.12765087053	76757.83988788733	75029.7348459347	71459.34918361249	45176.63948377885	39921.82137698002	179587.5029036238	164224.55805858274	181979.3214240776	46330.17117862835	83706.46557768395	153320.5950078292
A2A3R5	2357186.9782186733	1297452.8016438878	1525171.7904768141	1503581.6667850697	1377108.9948434294	1429152.5561635292	1658689.6606757604	1743925.1963661683	1558011.504934257	1558011.504934257	3017143.424218937	1582747.447198779	1863822.4961000597	961281.2071885	1616273.2031713491	1361285.383136225	1493432.7379281046	1774769.7067979206	1661218.6697720757	676312.2814216554	2425476.195992939	763108.6049414488	792916.6765582412	1048921.8714882124	585724.9453447129	1895668.8493691625	1743039.8045303528	1715685.2228377925	3424302.929923692	1613422.2980256856	3638407.9442279493	1300467.8131600423	2068600.583983756	1581647.4965840639	1514406.8284045898	1499928.571500929	650265.3127772092	1266737.5573801477	1271856.767521789	1215953.7365271777	1918629.8605341068	1332097.247515362	1400326.206818435	1318586.5625048524	1383325.261513544	2173306.272982212	1416820.501435432	1654495.9685786453	1727960.3183232911
A2A5X0																															749906.8993695225	835969.4662579611	878929.4890009479	810132.3720111126	523175.7082482421	720506.7700610518	438945.55939149467	837740.8036885961	1019028.0276239301	802558.3774801216
A2AJT9	1609248.5629415037	895701.5607156911	990213.9667007556	612829.7051470985	640728.5047527094	1392077.3746637728	830526.9939165602	823455.5843659424	883802.4054762486	852172.9344425108	1273514.3371559768	957070.0236584628	676135.1011107131	1074821.7430756036	953691.0197449513	1148097.1742318592	921417.3533908108	539363.0522440177	1201277.681054405	785266.1815682944	1526762.401215541	981610.2985112922	748069.8298219412	1070921.0195345685	945805.246827507	894385.9620786123	820218.355019343	944863.008625302	509515.3078422858	1088554.3344615456											1193429.138676416	646596.408234459	1270733.7027983894	799338.0390616005	819143.3406135109	1051450.1903303377	757810.7938721104	892663.76523301	1286853.1541855522
A2RRD8	464153.7879088422	2518388.5125936912	697407.6560646357	3156196.43695645	2100954.99584028	1052315.8195299024	853866.759900407	705848.242480192	872821.6491815569	986293.1714719648	713293.4884894731	1078892.188616138	1111677.214493334	1557462.243231341	1572813.6717827525	1562950.7670620359	1500668.3502145496	1411806.318376651	1622676.1345374854	1276013.2982426772	787684.0442047933	986181.2016883184	910078.6251842435	1629832.7040155453	1789393.20704122	1385880.261767633	1696342.19174015	1585233.597560077	1309524.7234904692	1328088.2259156508	976437.9291417076	1021824.2948052408	1075666.9633037485	1387086.091886067	1853040.99944066	1372521.0568538876	1354321.0737374206	1209781.4019969362	1666694.3761918645	1490858.8111534668	699867.8645351282	676953.3622075907	477636.7881523853	1516903.5353130412	1837919.9359925808	2068029.2189236043	726025.9722149655	1499321.1837196134	2711210.9254043093
A2RRP1	23838587.481920157	23643661.99118505	24790975.69602443	21370609.532103308	22738178.35508549	23162023.60275737	19712053.25629017	22659590.08122415	21565563.90496772	22027677.97397965	19455670.168967955	19827611.36907116	23198486.04239444	19566332.19352415	27149334.69438209	20872624.57971986	24254720.69280776	20532869.248348635	27764118.79152574	22887153.923075225	21892238.60475744	23336125.11252339	21532119.53243792	23569725.078942776	18648438.779091466	22763208.40656052	20195354.125769377	25797961.838919804	21897012.910640463	25876737.885989696	19711440.992905386	20717294.467178974	23889348.724283624	22991969.644294433	26598855.01574812	22780937.64086841	23653992.15971503	21397067.33802793	24069066.536793802	19698950.00204839	24379820.49649165	21679894.63526077	25622084.90238487	20881945.781126466	21380988.116172016	22026538.29269884	21881556.57456634	23526717.54453304	22298172.9875452
A2RTX5	2514746.904080798	2486778.925985395	3977109.715153106	3297895.4550283737	3968020.404548827	4205019.9444045015	2971809.3801816893	1870591.413429713	3570123.1303938013	4154661.776336074	3498106.018215591	3977005.6347999787	4139642.5936853588	3579424.497658282	2693063.928672804	3348823.095340159	2498833.274837059	3770615.2083372893	2598760.5491749123	2912482.682950076	3080515.0737066288	2248282.4675694043	3570636.4702000963	4002775.278300082	4053966.19987125	2913637.7377926935	3209506.0592498225	2552133.531746789	4736554.057554142	2648755.1291103517	2972502.7126665274	3176774.4368761955	3638994.2501874636	4222771.972623458	2570986.2471396644	3558188.394381553	2481770.2491504215	3566905.411134242	3239083.316827805	3588786.902166498	2949604.0558306635	3410858.113161434	2875637.5821148963	3390020.950212007	3024552.385392214	3830656.0347813033	3746871.0026076906	3364165.412939681	3099937.0953296707
A2RU67	741935.5835178866	1236781.4704069195	1661489.1563470776	1541215.2537002347	1432704.9636462939	1799404.6327277082	1709684.33620307	1214415.482201849	2317506.0204759273	1873379.017212272	1050922.9140677142	1801139.5231499702	1395488.7358877084	1769076.3118801343	2389533.559750687	1215559.5449851707	1125481.2502031575	1332811.9798150235	1609698.2750095925	1838802.4264589532	1043846.34212869	2027817.2810795992	1553526.4716481955	1621163.5011638368	1449945.7201631763	1481269.4264552558	1459278.1518313182	1471105.391965201	1657569.2247009443	1762997.9824568827	904837.4106564212	866225.9770993915	1416382.2348855631	1508641.6485316162	2056531.0902576884	1855917.868938874	2220346.3308675517	1438370.3506685288	1852668.7659193985	1408599.4997458875	906395.3064587277	1474183.5280693113	1366328.0038256166	1661449.1635693526	1638159.481685961	1899205.4071219359	1889960.6479010482	1268309.85157338	1776534.5636139978
A2RUB1											446138.6814837743	284490.531654794	396993.21871660603	356719.4693580565	332742.4405534683	316084.0434336879	298978.8693796605	417502.4075077533	257135.0182236144	450500.0753657091											654408.2641074683	190649.72640043628	493699.1135612721	228109.9978689285	236628.55029409626	190769.08664828158	833637.0994246043	286357.7988174208	247320.71565370949	195719.39587470648	205239.83099423148	219230.49797703425	469517.0230124061	275990.30856191646	355411.7460154547	330651.5190993782	417442.4590450207	512204.8255273763	475365.4471755661
A2RUB6	2759808.435003386	5151374.3041842915	2015923.8802438718	3980519.2235071706	4344757.810671716	2867518.9886363307	2447894.969815771	2273183.9186843033	2106057.4967286573	2579655.853405076	1577935.1878182874	2509700.1586206853	2584856.6727750297	3337740.3496545143	2564551.2285999963	3403403.4093893627	4206013.448908745	3852496.544844971	3205974.7184061375	3284032.0102997725	4286197.41981587	1561903.7582353768	4442963.182441288	3139657.794409335	4626761.2684003115	2541201.2386803767	1901381.9713445744	3082064.832447573	2315117.650960549	2629409.121044056	2337921.8244755287	2907844.0660618218	3808794.379794591	3255942.876966578	2719056.121371661	1768576.621945854	5478504.9767065765	2489298.4036616283	2811526.6301946817	2949198.531786105	354720.48597378284	1120102.4845218998	2531292.7133518327	4706244.890853514	4222156.378556509	4887972.224811488	2816139.7437882856	850667.0589963016	1527601.3779897566
A2RUC4	1665957.62086098	2995196.6730093686	1936068.3340445173	2635514.2531524748	2563450.8970753257	2521709.974277118	2722675.3898162087	1777985.6902555616	2120667.2479393254	2726227.8087777584	1028907.3154136029	2848610.199295001	2466308.561143123	3223259.19046865	1958667.5450850488	2579610.067398169	2918853.1646440146	2589795.958795296	1598788.0964372337	2452659.8635238856	2609930.370343876	2349603.7694078847	2814651.20931994	2539746.3187315324	2376677.735905228	2286084.0787795032	2422911.74023146	2024891.110915596	2229853.5329773286	2011095.883678796	2794057.470384833	2742709.0423342227	2433090.247005246	2007265.0686712584	2074873.8322712288	2500332.236119141	2173750.1208091592	2505833.853410277	2257191.316391401	2176348.1067521963	2836221.013059522	2044711.0271726227	2396339.2228877014	2658327.642034153	2419811.906648971	1992220.93120254	2569889.223295827	2361592.2579497597	2129452.9602792533
A2RUF3	11413320.840517402	7662327.224117189	8919482.653188663	7547146.503241368	7960813.848338068	8133584.929651802	8212244.934152364	10805215.796795873	6399061.598267548	8418025.124497583	10333005.29343909	7041977.753468918	9383636.857272616	8126059.513977506	8637590.67232446	8253562.829411169	8656546.924167238	10249596.874592904	7010784.9780860385	7778461.189759546	8934299.546727866	7626315.826217373	8662983.599503256	7930501.381669716	9275038.37339898	8475866.270699594	8150104.367673969	9119191.093008868	7392828.264323818	9904094.668791808	11017869.568672618	7208136.135247832	11469283.39560279	9142471.207894802	8425114.090735817	8247307.625798972	6055229.819711229	7986537.584011213	8700254.26708205	7219019.11715345	11227155.916153943	6900014.03872289	8532481.060866201	8277166.722651315	8067207.601528099	8036238.723698912	9401953.897767713	7431644.796364153	9077459.28146986
A2VDF0	399430.4085371121	753271.4912558438	801317.2942181623	669895.7670174737	689258.5868579271	698506.5008115764	758437.3181908899	696519.6442980971	612313.052790454	862649.7485560756	392981.6041181125	774306.3040168316	940618.8520045137	749355.4676449277	505422.4889154908	834291.1198269395	634249.4697390449	829111.1522124872	571923.7830680547	709339.229279846	784681.4183163248	1346572.9293370415	667132.8537808042	889469.4988512247	544798.147443726	607002.6260427792	693667.8999807708	521697.1387803504	351531.7440700841	534972.3442909301	537576.0247193113	1436730.9577900637	344912.1278403029	693348.2838377107	434051.3134953783	575489.1199167622	575182.6826857096	852065.7452323376	688053.7294567465	804176.4157350637	598421.3536823526	732274.1956127936	538038.8494337315	758201.9868459862	635850.5742962352	640560.211327121	997104.5221285028	826318.2108505884	459159.865435389
A2VDJ0-6	567182.7043206055	891589.6250502883	1215586.682329902	885851.5367493209	1093515.684784325	869935.1727716381	929604.4600441962	648301.5121467791	1830825.876171108	1265487.5573758134	962745.5017558094	1043137.4341697856	913915.9941035224	922003.0732191678	1244821.4692377842	1064756.497984686	917789.1162853448	900465.6970721019	1051165.3601466538	1177077.0412575416	1091026.9507465838	1090334.9588739318	1005260.6639420078	808694.2667045622	1063835.740691787	1060457.1921370744	997363.81551292	913917.7367519421	868042.7461355408	1298909.4503721036	596192.9619097755	968729.5952577195	856259.4489669029	944989.0155008616	1349395.1663734128	1149785.5281956766	1288002.9794663521	905789.8490685136	980234.2529980593	1158501.177998964	1240916.2102813227	903746.8872629498	961082.949784199	1136802.6235379383	768021.6767634301	1171677.795495618	1034992.7178779971	904386.7986750172	1032497.0633709336
A3KMH1-3	30682426.96182311	29569673.84278092	39092482.78248554	25663298.583251644	20295757.81163376	23809288.972636376	25190133.59458756	25975503.87563507	41650918.90413283	26462216.20728055	27591272.23706019	37875065.52336558	26249028.59789031	27746339.91200216	36456359.9710825	25736509.070676405	23481520.32254837	29332040.95474383	22546850.86836873	31376713.892616887	30969548.637331605	40254008.02423292	28679109.31721498	26111625.618418485	30969548.637331605	18974067.238445893	20641735.49005372	33990026.90516734	21276931.111478247	36525098.72679237	28782342.076699104	34368731.45542563	33788404.85114872	27292799.60056139	26002121.71151488	26347165.56061453	36422277.09110308	22778522.81462461	29571327.33490953	23038009.29820527	34892905.34141882	37319151.86402968	34074210.17675856	26344132.94235173	28109202.855267603	26747312.0698283	30420515.4570227	27298404.056007225	22672787.523486715
A3KN83-2	25267076.776144154	16635251.069411818	17527337.71550052	15772029.49188917	15798554.149490407	16465571.27446272	15665150.724495945	19181228.130636547	18836407.581820447	17056439.22800983	28611132.12728072	19144842.31851394	18097995.21000415	16530524.494928278	14393697.750416765	19440470.12865765	16248863.090518048	17028015.200351086	13369791.879964413	15339713.40941875	34632033.99716167	17942108.32517167	17149755.274708312	15262638.005018478	14715434.836925218	15378234.226924375	17475428.841068592	13755592.523762286	17479007.671468154	14414813.083361885	26912612.79279084	16890728.3495155	20633738.45842906	17476923.292641535	13694549.198167665	16592895.434608618	14768112.440721614	17867922.868964106	17934722.032804225	15432839.27035776	21241488.496151365	16516900.884944033	15592732.42198367	18320429.330458988	18150270.544107974	17784171.337110344	18596292.81742199	17068730.985407226	17379399.6786693
A4D161	1720339.2008719854	1121025.0290190224	1559166.8268136615	1103435.8089573365	788175.3826535529	861271.9663016099	1327410.6148303796	1398675.3257899843	1020612.4676714812	1076573.7466142823	1792824.884855911	780060.8296945582	1579008.1556381714	1916105.901883964	1018358.7577196036	1222776.5733110532	1098095.5194965615	1418081.7050192175	531523.9659713595	619858.5092134792	1011333.9396479613	1032128.070485315	1132962.8054793773	1024848.2580736742	1267807.3307657721	1113176.6486682505	1101588.680603772	1495012.1427516518	1460666.3611172438	1337170.8767187404	1227391.8973868415	996581.0310527326	787864.6329175512	1568305.524520263	1361276.3403202724	1286974.6523552958	1287424.5760713469	1280032.9721647964	1010464.3914337315	1170380.1350815357	1414126.0055722513	844916.9919168558	793664.8842753059	946796.5932398972	1035998.2193195908	1584004.1212497603	1471674.8971895254	1203749.271241225	1193721.6849635306
A4D161-2																					300890.93745476025	237286.099616714	219481.77804582665	176107.59865234458	256558.38645257434	197395.19208768941	314773.69467493385	305001.2401966848	338932.20874991885	217762.16159257246	306944.82119785197	194208.71507641638	233166.8475330639	241066.24202565657	206828.3480243373	250894.68374086058	374224.38438646897	262932.36948196025	285175.6849426852	208757.39524694858	138657.4552193481	426871.12984164216	512351.9704170048	223054.95382000797	197684.1165267289	241499.28083693288	166485.58724572294	199094.18068427863	259245.45413682715
A4D1E9	8843753.794128237	11084306.347207503	10449165.65269752	9386034.1809123	8257424.287012648	8727083.151087977	9682472.855575817	8355999.07521401	13436045.427845756	10028722.751716927	8489310.154472042	9464119.464752307	8351249.802122621	9616728.877758598	11811657.118905185	9203281.94762421	8484171.266074892	8555359.330451004	11092546.437355863	13182583.514898274	8740447.891844857	9874854.608265873	10566300.192704698	8354360.19536784	11427927.982364984	9449184.75994116	9544358.193702543	9864566.515255	8882700.925235601	11546307.924594553	8533776.902153544	11595765.036968993	7059669.728691064	8663111.329216996	12482522.149046184	10392907.449217128	12508629.457414355	9075161.85802416	8330964.911596204	9608499.701584786	10205190.585827475	9495123.82711748	7959935.588990223	9536829.750024423	9784739.31810179	10127335.22238384	10595436.556947438	10420665.803325003	10192591.585104233
A4D1S0	1599846.7736867196	667693.924103988	1029281.0164295052	1238727.296390283	529136.5741162512	743198.666944728	600719.3844550247	511412.4560785188	783330.5954888869	950616.101053527											1172634.4371546821	813307.2879275552	687719.8910837696	905480.8020009322	717945.8769114184	762379.6503481574	680753.7459125536	756436.7807388149	1068575.1838626205	1088765.1978334326	792847.0330943634	545061.5757468999	884458.9492758587	742709.5495560169	1166028.6443541562	949780.1536395998	1183947.3753955804	791046.4191458104	778407.1581282985	819742.6113453209	843725.7294168738	826659.9684997601	971696.05994011	753409.8794158484	858275.0912711424	892543.8712360705	736252.6130782677	819019.2658907573	953349.2231364569
A4D1S5	2818835.1813528943	2575679.7235343168	2178139.449394839	1823257.8071930625	2132994.3855691003	2164074.7841695743	2390427.990138684	2466841.8186170207	2347920.0510426816	2406878.62535752	3042170.2362587736	2210809.526584731	2938338.939215792	2102424.6921026283	1932823.932810136	2109713.128552441	1971581.639750364	2167095.1044112933	2451459.8154214867	2378633.2956570783	3076711.827649985	2596447.2929619583	2439469.399338214	2361940.9815957183	2106028.593826241	2381563.2182986857	2067058.557297269	2113026.734188837	1964007.5099970668	2198788.258240271	2766551.904516884	2449552.1615604195	2921178.928456733	1706347.9376516289	2421820.6606683	2482610.023141128	2396671.0581351025	2022582.6736869311	1864704.3703321437	2273026.81450231	1998741.7307687243	1796538.6789417204	1695316.3466377212	2539417.442903066	2388610.7987662903	2671901.7844811687	1911828.2442724518	2263374.840617993	3182047.037150527
A5D8V6	513801.73931498773	499604.05864787893	406387.3175847551	472871.9400735344	541756.2411224918	685987.4431006361	548719.8177376229	622112.9094006938	448038.52332446654	596212.412206286	587176.3465191432	646897.4516155815	639103.5064153939	509096.84706445	472714.95443076116	575065.2863604139	539389.7200104921	495207.793156928	259501.84104812559	611337.5766397251	637172.5587529524	897068.1058265704	668797.3948965331	708919.6635552356	490746.9597304703	514674.6506540041	494109.9647682011	357791.36484307045	247999.14155244746	318208.6157091374	597139.9586954182	412782.23632890795	557308.2022675832	628139.3810864185	427850.68121401576	528352.9821878427	385595.208121776	589506.5450014742	675130.158266766	533683.4337842918	609096.1305323837	563462.017404689	535573.6487748803	533418.9183067936	409106.36123010213	544654.2986046745	607834.0741153614	503699.0287791111	463251.65970673953
A5PLL7-2	3559412.5575405187	448807.6033339278	911092.6616089832	468550.4040638025	561862.2873442115	591379.0275045318	609813.0671140904	574991.6675192972	739700.6468101415	599440.4390860533											27670.363021541798	29574.385454877516	1242226.5130779424	871775.7419630128	1374679.6881323212	405343.8586559117	231791.3713695585	1433301.5212165997	1577443.5252205343	1871241.9988438585	3247246.2483252194	1177176.212515403	1028430.3835314484	578950.6920368869	494730.93862875295	563360.1869392309	371713.3212910295	516107.77049399685	687773.9689125654	399566.8057714686	2086326.7281208385	1532985.2536703118	1088200.497054747	499666.0716851557	491446.1796523112	600445.8856806593	969036.6730336898	828437.1425437477	315186.09959472925
A5PLN9-2	4289832.411577245	4233120.610846652	3902588.19648753	4565507.615658957	4474002.552333672	4751117.033176349	4621582.124689422	4741937.168462128	4139317.00105236	5122751.181903348	3783368.641408669	4589810.6836093785	5259383.906535548	4843297.9311430715	3849956.6918651233	5229127.4399596285	4595290.201178243	5371356.656855883	2937021.4169129482	4383137.575305355	3807878.2062610304	5379982.834140602	5290095.943006838	5004639.928228783	5323803.527181999	3897337.6461461964	3578886.4659406426	4709800.340802932	3923188.269275697	3926139.71837316	3696261.252730969	4268337.626224795	4124367.928122883	4598731.927168149	4349526.61376243	4904957.204886732	4027708.1546182777	4655352.0663162535	5266431.792617104	4950080.330623728	5216885.979473555	4330975.05629272	3929783.2210160717	4071257.5051539657	4637937.709698927	4788783.57756652	4568331.665842644	4066994.1349677686	4520825.540910731
A5YKK6	73255305.72489357	89346491.23517612	77027060.01497503	85510170.144788	83094930.95892099	82118683.38747524	76699617.24809404	79645211.62177734	77202567.21212536	82354050.6519407	80962778.0052746	87608753.59276822	76798602.99623461	80011580.20664805	88163877.49619396	76989510.73303874	76989510.73303874	76526446.11982	84587101.72983317	77615926.74442728	78901552.70693399	80126810.43794891	88479988.19151346	83703963.88653031	78608898.27940616	92524280.47540568	84639498.53190623	78901552.70693399	71071847.36717258	69295696.94177926	86024902.62911773	89796638.95959842	92672883.00300393	88989385.94234227	69272919.05969475	78128375.31279898	57819084.94956736	78048667.85156909	83018949.48143539	82482281.03551117	81518639.07329115	77750865.27868843	81518639.07329115	80326512.87368067	78962081.74043441	79807868.05531102	82322880.94105351	78905615.89270826	78765051.97390065
A5YKK6-2																					247824.5705783228	235955.1627626865	224929.9992090889	232289.36530909734	186400.24627644077	315725.1370482123	235677.4508343843	290581.09905973054	263554.1741973597	347856.4071527775	267177.2244543846	287531.6108856285	238761.29778140679	294229.50750438264	218052.63138929068	267177.2244543846	343631.5084633671	151200.67122545824	219814.0044023064	293190.06346823863	217688.79183553875	141595.7922882037	182011.36859733524	237891.14632832594	219161.31417753585	279339.1183753891	446516.5903171813	181440.8341105836	280572.5595991284
A5YM69	415256.1583724122	228894.35167694566	225608.9567618836	156297.77938893368	167698.9876887707	81261.13541805942	174275.10518632465	304263.0869176127	74637.06891363699	205612.4450085869	431664.18677155755	175132.7887786551	147149.85323222046	181929.46879385095	148003.76549219413	128629.1886746833	250184.7528174225	184560.44170295907	154465.80421631926	232091.0443898722	547061.2667480861	241447.49400395266	235730.7139386416	155472.004480806	194923.89025536488	137391.9246087709	148847.86359374106	86242.00133402053	194034.83940535036	92650.49144282108	689688.8807011944	300428.3165673679	174174.08588540493	151206.66014986587	115749.69750767485	140901.95956608426	107909.59887347255	69475.13063273572	101055.34101910198	183166.55245819435	312161.48113006447	143913.39455569745	226780.58330908915	185581.31774377823	276969.554183894	198369.99014693665	222101.1079544632	53268.61952624837	218231.13213007606
A6H8Y1-4
A6NC89											734402.0922033327	447251.17696237593	264742.93481088505	456746.450522995	421112.1380147489	467225.8583592593	208798.68637229397	407550.5514031129	511025.24095664825	304768.00024123985	285388.9908654696	220765.75932741142	179902.9649973423	224381.9876839307	291103.4522068088	542451.8364358697	407057.1990550714	812391.2682287544	510603.2385601389	749678.7181238005	692394.0133345531	721940.2473476481	373473.59917486744	418600.615414937	315863.55465452466	403214.0817852803	255850.9616936709	362503.6652315972	333494.17076372274	346345.24901786126
A6ND36	4265163.729505349	4612645.645006768	3854039.8351591364	5034787.659721458	3784806.571351234	3643215.502138398	4266808.225082734	4425008.699627155	4184665.6709923605	4051214.85488758	2874803.0890893997	4477872.514318481	4712703.943033297	3878675.988562279	3994643.505041345	4676673.9711397365	4788360.182837071	4657687.3151511885	4572061.219516566	3488872.495369964	4216687.40910374	4213919.918269819	3950731.5399639313	3993392.411168823	3736112.625793357	4980930.002891025	4498141.226913506	3869367.3094466524	5090522.639914297	3572553.9175086264	4399775.670856223	4243429.65501362	4510527.3389909435	4556594.984425899	3140172.653210064	3994790.582392084	5092647.257129754	4132362.4550608527	4245165.080012882	3806891.384744717	2988012.600561105	5262214.1700807465	4973042.811476965	3803161.3801691458	3568261.085372426	3344622.144597921	4719806.722310741	4630004.642800257	4310355.440169685
A6NDB9	2196325.655971614	2477247.7867430383	2391325.2283740225	1887785.560010151	2217899.285345653	2104451.7515683817	1968314.7110356563	2426289.38632505	2713441.8324760455	2354966.223696225	3386831.423481527	2257272.107899062	2518965.488523062	1763019.3804014397	2627807.776583456	1451018.4992450946	1519586.0631843666	1774406.2738742991	3646986.0347173032	1792153.414151818	2245883.851728507	3147418.7455994235	1956683.6984098074	1917977.2347257172	1463876.9416021963	2427902.701499286	2057199.309581603	2189376.959539992	1689156.059147523	3642573.644039533	3438833.0307368995	2271173.9657818717	2805917.1147450767	1721800.251197538	2768105.492126273	2339961.771135552	1254092.7069655913	2260855.7949788203	1941531.1624663698	1935779.2388683888	1626740.6464454466	2194095.542016146	2482137.2582289632	2563684.421994039	2388547.946395505	2417869.3646452283	2426856.5248143817	2170334.52502216	2100344.5906113014
A6NDG6	27872606.12299548	14560265.46179112	18125223.5712753	14084083.62998828	16059904.417499127	14687295.401006427	16996569.778957464	23267770.82644052	14482387.447919914	15950016.3024677	18976978.220635585	17485461.277697187	17615265.256300304	22231094.735427134	12602754.818562346	18051406.624406774	20259804.98037447	20382686.080118757	10045045.30257509	18435626.401072007	15659652.007063052	16922203.330356695	16783625.823091537	18742607.85761264	19063855.715363685	16260810.682045715	19934234.267841328	14824013.890810145	23720374.908353146	14174746.774384862	20259153.403561346	16061153.28158524	22864868.000299446	19803699.00187406	10885791.239337873	16112938.887234733	12015326.684916215	20817359.58549352	20280157.035970364	16985678.653033532	16828906.41528415	19004790.869007472	18606439.36201988	18254854.48897633	16721226.24062801	16020726.36826803	19068932.142580174	18877017.74412466	16601319.931669354
A6NDU8	4610227.759090599	5509324.3836662015	5324248.464600091	5945548.689946285	6523287.324874553	6244395.801863687	4988775.546213985	5091412.980620471	4538557.991615294	5700119.282479918	5334958.525545465	5498051.4503732165	6014497.866365418	7175566.237776647	4448187.55002313	5870265.554200609	6065872.5730650285	6347040.24752782	3466765.2080898136	4254696.472468541	5476252.492921643	6504519.317997652	6010291.455641218	6633013.615114792	5561167.434933944	5118095.795050352	5514683.614004703	5038226.239547449	5236370.434291408	3383283.484173704	4453315.048444146	5530917.452376542	5262485.297594367	7062575.064340742	3845913.9655600386	5282243.497403825	3612086.792980569	6468651.429008781	6714516.71008143	6243198.592772393	4349739.9693027865	6419108.428675487	6629012.505011218	5181883.249938478	5413986.605551602	5312880.977159522	6248547.629474931	4470407.338840291	4387280.928714454
A6NED2	517123.2470901436	439742.8546701415	449197.4132417417	397328.1353864796	414269.1099021272	553683.3648867803	404739.81173707545	595749.2994010025	484898.0257136875	531261.4868513643	547150.5871416469	713174.9941144091	644250.9388894684	363080.04897619307	324968.2420213807	595392.5594266488	473092.508975145	612535.9785286676	317993.1081671269	196358.12861800552	495104.9420988645	640450.8361484153	516731.97400292935	522567.66629033245	257732.1477642561	370162.11452980345	488056.21265059686	589809.266747993	507634.19529644423	399750.3858184619	537329.0152414447	622820.0749061069	448114.7946351736	538290.1573323492	385407.86116753146	445899.1091835096	441887.6056146293	458530.53971502796	458515.3637872768	451205.62525381905	699758.5636780577	656810.6723596029	344339.62629215576	388182.86383988045	395412.66494254133	431006.26851683256	567611.2057751197	503500.5854011944	513315.87828891276
A6NEM2	96109333.50864989	122210645.5611854	117901697.02808018	98641470.30588064	106721007.23485827	117103667.024348	96234975.68322712	105414388.16139004	104033341.41917996	104033341.41917996	89185624.81841956	107603636.7517008	102972233.06935428	94747904.77331904	125466541.55195148	102874157.60415453	105220963.37857684	95374901.22234096	140289947.57785487	104667957.86265776	88146066.88793021	106938795.2752346	106165433.64833966	104724521.62612176	101821535.3353716	122013831.7424418	106938795.2752346	104724521.62612176	111228439.79842363	115701926.22974934	86950498.41623844	106809562.86932991	109839717.76022243	98466445.8154824	131811737.7538242	115125503.64612912	116803638.75386554	99139058.67242941	100038382.82658309	103419322.30754662	83258294.54188679	110229459.37611388	107348268.83879454	108592177.66855972	111602715.58711572	112808625.6600564	114416424.60200527	107816063.61238144	108592177.66855972
A6NF51	594829.7121345585	143412.69511081075	164410.28962496392	212195.7623102404	115674.3600111135	189753.72338489923	243485.80487987184	316026.9287508339	181743.62255922012	153711.39617239806											283653.23475471005	162968.22421061905	214304.48520549608	207123.55992436848	246531.729018378	256333.62516561555	231314.05123453587	174294.56259630824	354981.08475384366	183788.89583578802											298217.9276133012	213904.99147230692	189623.42992052462	289241.83103787136	245315.90586300316	221015.36162964135	218984.21470063925	202911.3070261459	180964.61530863703
A6NFS0																															589791.0833746685	627992.0986895495	1021218.1082796169	716976.0195579015	504114.40222617437	503179.7475227363	1585318.1700623457	771880.9920085869	2509188.3961531003	547683.6907095205
A6NFX8	40053923.24764615	26038368.08412059	32583494.22549945	36799565.37174354	37664483.63588722	38993668.669448666	35239040.273369364	41181535.17551735	33504044.67104032	43771051.06297378	52530111.91375841	39730680.27245415	42254798.05333727	39834609.21796133	22855330.71197065	43095827.22957981	36524155.99807127	44453573.04828485	13889353.471167255	30660737.93694514	46252378.93267379	35552410.86941919	33756967.26381454	39541798.97845779	38472415.25043669	35846688.45550853	35513859.629815325	33735947.436236724	36354781.47937167	30801929.836834013	48951415.42919235	28012192.57939152	40734297.71219335	45622769.82687511	23952325.39787877	35747491.87228854	31067398.55376298	36374469.6050531	38691395.51376133	36675420.50073217	49297489.83608653	37255099.79873055	39884150.72270466	34392107.9027079	33361653.621065505	35142204.35276831	34867249.44363601	34406032.96056793	30372844.185591504
A6NG10	2649636.038347236	4665481.133221324	4170275.015795315	4058573.449411859	4552079.706129328	4082661.04976047	4950688.305846434	4062567.24843339	3584784.079238812	4240915.335988652	2720199.3518316573	5700998.917027772	4857207.55988193	4780432.4458755255	2975756.1549291783	4985627.195021773	4529919.053044943	4676970.486685213	2164055.2968246765	3626500.1768002817	2444229.2589996736	4997539.96835983	4413643.6723243715	4364801.949943637	4181187.3401768594	3257747.693925483	3138081.7564009125	5000295.434026514	4562876.193827963	4657261.827299465	3820434.0910727805	3378155.125588593	3944077.8931619762	4847231.730521912	2749461.686236349	4744612.687903992	3134890.309323479	5040173.7470417	4885865.674821114	4472763.3069569925	2998954.0283154533	4741523.355803704	2673848.6403823392	4744414.664196474	4393009.490306053	4986139.166248878	3763371.485696069	4487187.74497122	3984556.5777429175
A6NGJ0																					453971.80641475157	888648.689825878	780513.2724265823	816724.1587507175	481602.838144046	517852.7238072488	512373.3166682708	563930.442915451	334877.57473749993	602637.2869399036	474181.4403600195	819595.3184762539	413254.03696842643	615641.0455243775	484522.5866867047	611373.0487319025	993981.4693871482	466079.2431703704	602487.2193442908	471886.5174945576	568984.307556718	752535.0461704669	608490.6163643601	607517.7055211235	606652.0446921021	522568.03354750655	675728.7145618922	678892.5899812364	472566.5447773924
A6NGN9	1679272.038180194	202914.72461008804	379500.14873674157	150236.4214455784	450947.4818172996	366389.23176131706	410002.7329022442	780475.6929018084	469951.1469961594	351952.89421733865											831529.3543094553	294835.84851919924	444421.3296904244	408970.68249461375	578050.8123876607	359274.5626243708	305954.26621631713	642874.3947977325	719115.7369198445	656628.0913047922	600781.8529847899	701427.5492326254	256372.63383321196	385707.5284220719	734546.975738058	613390.9639142592	613908.4549534066	510132.5690053626	382318.5932022896	443060.6816387967	932093.1357531076	399657.65635337314	735754.3264208613	419789.790780788	478132.58168832964	390500.56510879647	521482.8800679858	566999.0100777933	513245.9867180848
A6NGW1	543205.9591040881	642014.2958479251	671038.5898861466	743502.816308763	540365.8467290769	494841.32700923685	626203.4178301443	532551.401611813	780341.5554642484	616552.5505364167	573713.0481100313	751116.984128588	509767.86191310704	582043.9765940742	703078.4432524709	607166.564048079	509767.86191310704	533911.0342620473	700104.7973913111	719940.9033143652	478755.07926144224	823157.5137785253	743732.4318909022	651494.3111856033	455642.19904199743	586842.2666229018	583944.9488965296	795227.5350502764	425675.89020634635	646142.8914757036	947648.9192544195	618779.7489155306	697106.4666362372	637023.8368177562	608330.021521859	456815.5797038821	511481.7895079442	558074.8913344175	691320.1447671751	464028.6658694253	652651.6516568863	646238.9180905218	597061.8657562224	603639.224721604	482375.3901060647	536862.5686830791	773356.5256152978	717889.2516394837	553815.1562841907
A6NH01											3612859.700230746	1174533.3631010845	2256913.872713577	1506917.6866893603	1270687.509493322	1179858.1605805522	1490327.7107273194	1200541.7669747851	1551609.050505471	1311593.0346390593	2360521.107606526	2269330.5164925503	1801438.8246725185	2067779.4122369138	1500446.7831137762	821685.948989208	783054.9162448095	1570283.537032356	1018092.7197386808	2363190.33725595											1959693.8501233372	1680620.1396692772	2344563.703259109	1319511.3517062657	1529380.959844663	1562349.4377718668	1222863.219116066	1777137.5864010262	1434811.920457081
A6NHB5	14968227.600286765	30398347.49643113	27939135.672801875	25878609.830860235	32103945.57418745	34366245.41905637	29193537.90786781	25738291.81340286	35269123.30685382	31475421.98608108	14529469.515382444	32372962.541061226	25369451.99596744	23226685.42648593	33728502.0836792	31101504.56623153	31151570.007031016	24979653.99448824	41392263.78289424	29478824.623943605	14513323.673193967	23255867.86692734	28567960.91094581	32252664.343995657	30082733.93103558	36446065.00165117	32645887.218341693	33216636.3530973	25983647.36035959	30366101.64491565	14297260.82531731	36211259.94258763	35981957.071125634	32363335.275292814	32527434.867467426	27503127.69450353	27443050.96297338	25656769.478810195	23647202.80912661	31699487.39188464	16917405.546829794	33262495.736432876	29427420.02520706	29814503.83447663	29087164.41626375	28847160.72914565	30221227.640127145	32216372.79487229	30304962.36163776
A6NHG8	262429.5833704452	549061.5145731283	424222.3306322812	369358.82190213294	492554.7007473662	338292.03506290034	369535.633209889	370804.5143596668	359550.99465426005	344906.8581060044	983346.8049342516	505799.64412887493	420096.3322712759	212973.14121043246	164970.6504399034	470442.9155446279	234954.14897813238	363755.8633437756	174100.27387195092	350184.8014853265											164196.37440475047	300269.85930283857	140928.68905407624	448053.1573538113	641190.8305006219	358131.73756580945	768268.720216385	268862.97324401076	340596.3700664441	450194.14353924	427185.12972638116	414485.43149364786	527012.7965119472	325002.2718193642	341939.90377662424	387379.57918569306	480614.12112528156	307937.7133944812	330304.9775778403
A6NHJ8	5597370.258630781	4755738.8016186915	4484866.032541693	4789920.96084355	5280860.138432594	4983508.7016243385	4831356.407513685	5338336.1886023935	4057162.015353998	4999265.8433158	6256648.871411688	4927828.85604186	6404905.145245137	5188511.5318314005	3574131.5091753663	5290592.0582829015	4896070.5605142	5606967.7911718115	3360526.4349292316	3612200.7480450612	5831938.895280054	3619962.550266148	4458855.669830792	4580928.841691717	5293473.174369568	4480408.259859132	4641223.739301365	5405162.709739107	5279829.599564583	5526601.519942112	5127055.488420866	5198144.528676479	5256215.833377416	5622034.54267561	3907049.584406095	4331651.505818372	3752555.505647438	4832870.937054637	5956224.222618302	5134581.366788413	5696474.574906087	4676252.029561347	6036213.385501816	4598640.897691786	4337987.2923173765	4445828.626892839	4557226.45590429	5393236.628258659	4367234.779455438
A6NHK2	578412.2859355154	338209.5192420461	332892.4373589122	353657.79768628656	278327.68084469717	528144.306402536	368229.47614438884	462557.38284949993	338223.8897336221	471754.497458164	372223.43995873147	533093.1307248028	295422.5917242576	389859.0143561636	711657.7749266818	270851.5456446029	270851.5456446029	517179.5484402513	309234.1560503273	380061.4730242569	62002.55654570993	170075.26973049296	452386.96541986725	715825.158134248	434703.29823076405	423239.55104814225	300836.0851703044	875134.9076702462	390287.5120676417	226054.54978882673	95240.05851997373	395686.08812380943	212679.20412862	986135.8438396662	126144.12924134733	496101.3375468567	49349.0761673903	812670.430816751	335504.96051737486	541032.6575010726	162460.31914284072	412237.9050581827	211573.1440182484	368683.2634886221	371537.6595605281	720519.8526734574	410158.06872438185	493530.8183120885	363935.4991680146
A6NHQ2	10756575.815251028	7848881.470726037	6506208.25697241	6371478.6280468125	7424218.963867414	6275935.067664933	6528663.195126676	8347748.742326412	8619834.347355846	6937475.157405818	17635452.311689407	5954364.669960602	4538204.951895309	5963998.409539279	8131589.81474126	7648832.420298745	4925695.366059811	6626942.414619982	6699730.66921442	7492194.950852873	6673811.358374951	3999215.812812292	5979198.654158073	6995050.753629123	9774428.389262624	9230083.518975113	8349247.569659878	7148823.882025842	9220342.610769967	8246824.784855777	6073652.418029026	6702877.811753332	5807953.88661832	6387503.182996993	9988290.896379776	6632376.610497338	13075899.63337242	8243140.98150722	6777935.08641326	5927395.633859776	6252823.449085258	7335310.565184241	7038082.968761278	7365019.63401141	7330975.140393795	7228978.567692226	9447118.798636202	9649514.682274437	10755504.36434269
A6NHR9	70283621.39217775	84788607.03701851	83864341.5336302	70406769.30572444	82728963.39851563	89028020.5644646	65710741.43136633	72600671.6947195	71611396.69109288	73475540.74554573	53512090.434439704	83877498.80358528	75823018.63852237	67143376.24453314	79946664.64541867	75726603.84761432	70719548.67414336	73661526.82280667	116944970.25739203	67143376.24453314	72632488.60153976	65887211.33515909	79936615.25223827	84706370.54889202	71556457.47333738	92532070.01944897	71779817.77752009	81865659.78995425	72175490.42835622	71426492.50024019	56907250.18438768	90521959.00355317	68020164.65665363	79292608.35959594	102348562.46255755	66109634.94795461	86955636.88064833	70705520.30276947	68487183.02989116	75150155.38897899	59980840.59085642	78776614.74839398	90729296.14533724	75360840.53707421	77063962.04522963	77003580.63684852	77003580.63684852	79743902.24187106	76450487.96647713
A6NHX0	3549332.578825468	2550662.772557376	3374096.6362304725	2552244.0185749917	2969297.6557209906	3406681.598807757	3213656.638514592	4274220.931757905	3170511.2114625205	3334294.4150442164	4085031.5960581824	3115365.8722539763	3848950.336092159	3567838.7617252083	2770959.2604928417	3435160.4459390906	3610764.099185423	3054969.226185851	1918427.40737411	2987529.003431496	3158606.1852862164	3312013.952342955	4101268.48678104	3734626.3157665273	3426517.9480838086	2931610.3993335376	3045793.731630052	2756517.978932345	3010503.786432912	2917528.3538942942	3173339.369622785	3767594.384034781	3668246.1043997374	2658012.5798993427	2247839.6485095783	3105419.125323845	2604713.723251473	3123577.266491647	4742667.715464235	3303587.90471224	2921617.564726476	3153642.47502574	2067735.379571599	3361582.131602065	3204755.5247816606	3060244.002444026	4112148.3867599	3227968.914116439	3238976.2020169683
A6NIH7	4881211.184943732	6445135.193054522	8522728.16351021	6039814.039820919	7153260.673879508	8728982.25319516	7691474.008501179	8281623.777277574	7885930.526981269	8631753.993955115	5162280.202416989	8465620.709832966	9949140.710917505	8381986.582332502	5554405.968948321	8901950.121916654	9130439.388363333	8309766.541711752	4331127.148721308	6075199.623941908	5151467.658455892	6026796.556580902	8048228.614446977	6896551.187311445	13159189.929836413	6886762.435932375	7076870.291662747	7975281.724316662	6177496.031004335	6863274.500138419	7021421.847578041	9543430.364367243	7172421.298028911	7408377.663753657	5645279.719238843	7236591.330615668	5560911.905903467	8024094.38626232	7716814.607269016	8932573.732851217	6299588.152044748	6352052.042726955	7256242.859716442	7121973.160109659	7111291.07927488	7348595.5332627	8860988.876769118	6746971.275513009	8156782.838952271
A6NIV2	16078.503375683471	1838788.514535089	81858.86683351126	1859446.376280305	1520084.277552548	338144.1207520272	102643.30276051805	71011.69827319127	75634.04410069004	270809.04423106235	52027.669823446064	171962.30655891533	218627.4831973853	171962.30655891533	385137.56274962146	162046.71926072493	4250511.666431516	185300.3418168612	327851.4909743749	249065.1955190702											96689.69684567736	253680.25278511838	1954400.953186486	284545.73453600664	500525.28213981393	278723.9709222857	1767114.7051264357	293452.9202583534	395283.11050763546	350082.8026827302
A6NIW2	3903215.6593285995	5080595.117536357	4728657.240591386	3298620.1210357486	4479049.649247326	5189838.31251555	4071712.363264506	4652973.555109802	3892553.5234986288	4810083.622346638	2782321.4801065503	3245111.54470831	5439435.556191202	3815925.1232785233	4041004.708807624	3936359.224507797	7560911.623515898	3651209.4592192164	4939780.906944873	4695240.933107382	3769686.357470074	4581652.225209015	3847445.443167139	4976830.6714931335	4313242.812595611	4657302.806528098	4268322.085233804	5107564.332335172	4072799.8353228876	4512454.945167995	3211726.5163067062	6745221.551872341	4384677.755206668	3442696.158878812	3172172.2556500086	3209172.7978998893	3509263.0853498382	7453691.13708086	6034186.898397419	2944494.0723578013	3349458.5781241492	3555201.5002734708	3721356.724373169	4831169.56226714	5470906.762749028	5712617.936269147	3171087.721483425	4176049.7134002536	5607540.874874582
A6NIX2	440211.4291818347	379672.18812481506	481932.9910279032	409328.1886790548	443671.60234011617	592361.6043750218	415239.16461097536	589626.7438155406	364150.1307981463	517141.447978535	353429.25662055187	485192.13303861505	485699.0804580536	598371.7654812605	460482.0673939832	457266.5723335446	320521.12699299987	579658.1635979871	495446.955123257	397258.4820840078	329546.1367365029	502700.5732101813	540582.3604024416	546663.0497696707	389018.9090103125	389990.00417791476	363380.18145445845	536471.088337733	389899.2476201949	645079.4609610628	338948.02833128104	454132.3207470271	485720.4705939625	503024.8186972244	436661.8129226089	434145.68000224436	560106.6171901178	410361.1027738925	542102.0245476977	468131.2772544328	443324.33379908476	379059.0779237893	479766.9296081365	515160.5934774006	508461.9687134114	509812.0791309596	419749.3288157428	402094.0387401121	467574.393991201
A6NJ78	2856447.188840638	2900844.023440638	3511388.916615468	3070153.9858982633	2959726.26593979	3468408.6420346983	2779223.033741911	2679330.155891912	3465304.626056308	2913354.148444452	2366714.724358364	2819496.5616431893	2952133.053541468	2809012.3578479886	3414531.6964657763	2864676.6916671125	3372142.3257254674	2771902.8019685727	4099172.8320703683	3134399.805132136	2708654.45905782	3325145.438476257	3572480.7749107433	3076384.994469485	3223487.7649865383	3040176.7057810393	2852484.76033481	2756369.171848425	2377501.6846681563	3671499.360303635	3699478.35122755	3528166.5164539763	2391219.8088761773	2949748.200671603	3246325.488298845	2811042.151815256	3881675.6917685545	2597243.9899374167	2445413.812290007	3053868.3290729127	2605221.4066219856	2800895.6511159074	3589486.8594367336	2723773.552865055	3633118.366955448	2916791.8429624927	3276408.0682464587	2953293.462208292	2707227.099004605
A6NK58																															164725.57689222085	223397.13480901343	439601.1482317253	235747.00414286822	324213.10575663444	194086.52016117203	506460.7856598353	266687.49182818696	297697.66529658076	263512.91726587946
A6NKB5	1236041.142286168	1506126.910972679	1299137.8316836855	1423354.0921607509	1310487.2512589544	1176271.3346736957	1728020.4206586762	1592321.6653349404	1310487.2512589544	1355846.908053916	1631849.3865023572	1101367.6933500534	1377016.152254024	954289.0091773988	1493616.442961762	1475165.9212473675	1104754.181512822	1540501.787698023	1655321.25273396	1604202.7977942382	2011427.5840138958	1684386.3132731337	1191057.8069197477	1342747.58599107	1061682.8429601898	1354250.8185772323	1471230.6853988532	1099013.7449130672	1837058.9634831469	885239.272247759	1381501.9260100059	1653846.9112238854	1144604.8587849126	1422688.3131879081	1431226.9544321075	1535950.87792714	1041576.106713361	1401843.9830917746	1338934.2880426007	1585927.0428564236	2394469.3649718985	1682778.9477598178	1789188.870280039	1037865.9069725394	1247841.8342618844	1293289.827553457	1082949.295424228	1304847.8009777886	1134121.584701984
A6NKD9	1429665.5987435125	2476534.373423508	1831685.442460129	2031233.742998861	1958852.495709261	2368906.25797863	1800407.1461175696	2094257.4146720152	1723873.3746740737	1926540.8670849532	1701427.4945904815	2104052.741961672	2470249.899510739	1531953.5196368475	1822170.9948372985	1931972.6543221837	2191625.793243684	1808757.179542461	2259269.7475162214	1820465.5240355262	1878867.0617198586	1591547.4479552775	1865884.0536322647	1772886.202222216	2222705.0965614114	2195257.3240284	1951684.802732886	2335248.019929414	1480204.041638846	2347666.5494045042	1884702.560673687	1878285.2442624152	1762502.3946449691	2047123.9351955843	1849452.5127807872	1705108.0858962738	2330841.62836433	2036277.766613154	1911185.2889624548	2236476.255922919	1858510.1562584804	1593793.7706484413	1548539.683547179	2270046.463589872	2124761.7100150227	2053654.501374101	1615953.5891110064	1834214.4516790416	2593989.1913157217
A6NKZ2	1882780.044284841	1224511.386966971	856407.676291893	998657.4047516049	1324269.942501419	980435.9648305008	825017.8007975541	1387432.4968497842	741237.4574964438	892238.0707586019	1567607.565336959	1130984.2838204938	1219820.2079382178	1145627.1377737895	711157.2171328089	1145274.7696305288	1145274.7696305288	1250397.9323701009	811503.8339303967	985377.9366218086	990374.9898833181	696771.9688361997	706117.7755506132	1023668.5035341908	1169702.2700622529	909584.6986648815	967327.9057108072	1171178.7008228241	1834908.1492374483	1643415.0795914098
A6NLH6	2465783.287300011	723463.8994365764	1130336.22082636	473383.9567151947	794904.4370650727	1222063.282991877	1058610.225535523	1799677.347483117	980337.73452167	717945.0512979872	1932309.7630550847	1015456.7980732184	824485.3046524797	1334405.4020873157	1168378.599714435	861992.7205396574	1201969.578601345	1051337.3862833618	943665.4952144679	1032508.3622436143	1457281.1708095637	1169304.7055745246	1283804.4551904108	1471097.900372151	1285211.7146828964	965840.5694973121	988535.8271306731	795958.7622180545	1184068.1369775115	765408.4379630003	747210.1946413661	946110.0043945065	2330731.252994964	1096417.0264317307	965373.0115317478	935089.3416573348	1324239.130074104	1128717.75541888	1173654.2762031695	718973.2192752848	1500644.57592744	1383219.2076325787	1302744.8049045377	915750.42119433	944356.7200659243	1093639.7372992493	1058167.9266984724	1411755.7350435106	1064238.043776103
A6NLN1	993577.0583038469	576763.1325527527	738778.0683981987	739724.05646498	687163.8011218881	786396.0187393323	774049.9091738934	972147.532709418	248891.39095799462	675483.7443789786	1022394.5365354734	450920.4853010384	601624.7340683076	837962.8219320256	871721.0161445128	605951.2894525403	640502.275773786	795680.5761315684	913062.9736299308	453157.5110962953	1294117.6766566671	394151.207491027	706076.7699503961	613441.3039833772	551876.8197112252	901605.5546309577	1032189.6483247986	577663.6503828036	641099.5143517817	480751.3653870754	1397965.882183007	520544.4019275569	949259.2011409792	638522.4389115929	750253.717557757	358895.4352637757	465665.3895982723	644498.5795597378	698633.3932422722	768734.650618718	1108577.9722564605	945719.6719455642	847497.345029086	583486.7904363052	637176.7581322571	532194.036039322	859901.9725761309	555531.9856165844	652790.3537461756
A6NM71	121870.11429927177	391105.62420248217	302648.134952876	318666.11273591267	374091.5035224903	342613.3879787116	187268.8877701631	198210.5213503171	334126.25049665483	279776.6940387885	105132.22399275168	349795.6317478886	287692.57122609136	234477.7603634617	319546.9111336245	270475.17148309073	236398.7691607657	322242.0578044689	372345.98128638975	352275.7401205273	107020.09787334953	327875.4561447196	325316.1757029655	325181.9812228735	289812.1503986317	313861.7182951148	282536.8925136453	397924.97475273017	219159.7151622079	261698.4068193631	107919.06808659447	318995.33302736987	224150.11021306773	324702.54592165706	342162.2896338008	238377.56984527165	341215.59555181005	242881.12883531337	358715.91186746757	351264.0770220833	152926.03427614714	264186.69883311976	230482.1437931597	314995.0579232088	219163.44993645672	353642.10928059585	316525.1776482816	305709.5368518765	305919.1422936673
A6NMH6	117349.95037446619	135059.26272651347	149504.335630939	124843.60305987016	166823.240607191	266666.312083726	215989.26577563246	192000.90146287766	184059.00327193094	201085.1027163365																															124827.35825007384	232921.30512561137	230728.07249730997	177768.17957965579	164925.37217184552	120993.96904756436	197467.22289941704	160416.8487515807	136256.9609817351
A6NML8	10171190.61099377	8807269.965504514	7054962.04025903	6717049.253686828	7780648.434937805	9554690.564441863	4836007.964755949	5626503.592947845	5106849.587055088	6707086.923861518	9373851.553544212	7540030.878415002	7819127.252316193	7226113.197525046	4666719.453956686	6722671.280584168	9437526.38231762	5754650.01825426	9413710.601289697	4407857.082765183	6769079.88707852	8021543.465874663	5611995.217086927	7173721.461437695	8193527.458350862	7254179.774253756	5870168.134036887	8133648.146161247	10472306.16867618	4862092.49569452	7653678.96755994	15673127.288688002	7663942.892826531	5541439.979622635	4644230.546280923	5066889.840905517	6002783.061569108	7275180.036681732	7929356.19086881	4911635.783177078	8683628.744368037	8779078.510727795	8967885.048570512	6543023.984102287	6210674.797620715	6665153.685155379	5764475.8898184635	7147002.505694407	6116220.928823214
A6NMQ1	36827822.11724574	41701186.918264106	36827612.38085767	28952710.13019836	26197473.112278573	32562273.36884839	29345616.29717905	23948980.181569867	32607017.13163623	28968090.79865667	38837960.33869077	32736150.71089416	28595091.155199707	29239999.588024974	28047828.64251141	26919750.14007876	44732162.56104565	21459834.4340762	39898568.32789194	27471435.95538573	38574630.93774825	26964251.882270604	43639584.48646358	31311250.22464554	35269616.23191873	26402451.833035745	28289111.70280526	31563630.92193536	32667565.07218349	23256689.964263827	30085668.57840177	51410761.34709282	24560308.71089837	23625597.26936272	26227582.89717331	28215498.25795113	32180280.36226793	38470002.70307073	31961515.638442304	31201568.40704615	32638720.15547949	27932724.37256624	27792841.22605743	34317317.91358523	34400022.54765249	31682279.86219657	34760324.77544405	28654603.09214092	34077372.3703037
A6NNI4	16242731.75053339	6640337.94320719	7895303.695650577	7110155.61892914	5516802.80278986	6008760.982425582	6025748.093187007	14557381.323304132	5882789.149812749	5310953.376315709	14387088.165827475	4542240.0470823655	8529682.944924334	5370097.377906435	8914679.413066298	5506742.393017122	8652769.763518887	7688724.2417515535	9324528.265159216	8274407.301682442	13139611.543464748	8588934.619231945	6476979.057513506	5266388.628448977	5344926.729544983	6444657.229207997	5622125.824128501	8429986.11601004	6450274.132297675	15427080.545411665	25115885.392194405	7661591.1093424335	4378466.6045614965	4501622.179595262	8690430.905542737	8806093.022857884	6834835.700228029	6005315.051591036	5139248.860868487	4057476.91800433	12780615.243622353	5482276.543739217	4790935.841259351	9233691.016454948	9799013.91477908	7619809.6162214475	7614412.439350236	5924342.984213816	9930303.380064836
A6NNY8											39830.6385947853	123583.85819424766	121375.23951120555	80272.35187951133	259325.7035798102	143828.35340717994	1468555.0169799489	99521.91024161637	301465.8658006648	287056.9221879747	166314.76855752335	325568.98834389396	335203.2320621659	322149.94412558	416924.89156657044	293644.21910622384	208763.6228515652	336626.97820312553	183303.8931818581	336288.1540013106	295838.74509503186	369220.1897102578	265843.84020914545	289783.7814859457	261718.80417375828	241123.08853993253	390489.170154145	252408.00855102733	259140.65665164136	299241.8998242262
A6PVN8	754498.7628235278	196321.20200769074	384887.957191324	140084.52753446257	331961.6293278141	666151.5479728861	292957.65311853174	346115.7230710364	381536.6100581681	344208.3074154636	1330202.3746921178	398293.6821572785	330808.2447853654	600062.3119795943	243016.34276822943	217069.56085098602	121640.4179790038	328784.871883562	67478.82504216861	201318.9913996929	1454998.6340082262	1252715.0419257141	128092.36084675525	259765.78185094218	53812.374887268845	210503.05128006567	359692.02406720805	52392.299307597634	58196.08645929732	8535.50319205091											1178398.9272248885	569382.3990837454	301510.3544199564	194055.13255338508	113431.2020598195	101671.01971714904	775731.1655499841	182045.85918827378	136479.8368442548
A6QL63											993129.0426794252	263202.5236086148	1188832.8001316448	323052.39134012087	272177.3947941589	269537.72679841064	604852.2967931994	318724.5635796499	496472.43989800045	309577.80703624315	725072.3079711712	317471.312804587	411708.05630576384	342194.91821164865	282331.117167606	579077.5676083328	430122.1326220858	561511.9830438413	702497.0114676806	687594.2467626572											434346.13195722474	608769.9132449945	426271.53847305133	449825.3440124512	451988.80466940353	427667.3195420528	591462.2279893762	553776.1391263363	601128.0118922114
A7E2U8																					1016533.8594461344	1492169.4942300324	1384592.935936725	1402665.9543758808	1600431.3782496352	1321033.8700066055	1508930.603421709	1587958.4500310628	1415765.4661156374	1991164.9459130776											1516633.8786750515	1835324.609283041	1380102.5019173466	1150478.1763701052	1583804.792491699	1794465.3959614232	1397748.7834200074	1202136.691305339	1616499.5853494157
A7KAX9	2108473.7824516413	3492516.0410964726	2360213.517689024	3326040.6418981836	2948654.71023544	2614409.2503433567	2285919.5958262845	2436437.151807939	2413105.176346913	2473715.6840295033	2820631.153829615	2507705.77194286	2960063.2108627344	2786009.159611247	2585520.863889613	2567669.1663253573	2575221.807602543	2656813.220187888	2101694.086314802	2898154.439181568	4329079.23010351	2618964.9851983227	2755719.0929566296	2758745.8438325683	2426546.177239804	2313809.3376820674	2113497.5889166123	2692005.987018127	2080203.3292812903	2370908.9929566453	2336247.7659265725	2638277.8131754007	3088993.4288621615	2820358.898677836	2601238.277019869	2736130.9135474577	2340866.7199498517	2482567.918463312	2744601.6596801146	2670202.9365715925	2904415.1051713238	2561598.3228647765	2243605.60128619	2652678.1513103205	2538697.252756588	3044268.9684274364	2699704.012830188	2462127.262623866	2941826.013592333
A7MCY6	1818457.768796655	1392767.670996745	1280992.859750454	1345403.598799235	1355286.9996231112	1137104.3277262852	1200781.8768029683	1011435.5665087434	1054327.1798764577	1306141.2757934043	999267.629120994	1263333.463697011	1330935.5172581384	1798771.7256428152	897896.689216812	1978801.029611307	933047.6143727644	1366311.4254766554	1203980.7890965918	1130379.187200404											886539.0984032879	927045.2420275076	1524855.1179967874	1416123.3947141138	1322378.0503970452	1386096.9862615464	1401584.1034264795	1275201.3586174904	1285681.0937891428	1477213.4550321419	1509342.345126589	1438086.146920053	1026368.5498253823	1351576.1092984492	1174187.563612429	1102430.0655190127	1259551.7729211638	1447897.3018489932	1188223.9604450734
A7XYQ1											3191926.7155762766	3755511.779329946	3892813.6733819167	3903021.067137367	2468508.803261655	3859017.2416184437	3009998.5939471237	3816569.4212451694	2103967.9177392647	3115869.1840570075	4054591.688752257	4325780.264680168	3465628.729765456	3089445.3657502118	3299228.5055565005	3623583.8298134315	3789045.706893388	2858017.6855017035	2315809.4361291025	2296104.146420148	807666.4223312323	9483792.456473105	3063573.1465594387	2911685.143763001	5272323.76131841	4457480.040616693	731470.5859024703	612588.7117966162	5085021.45735182	690090.9424463217
A8K0R7-5																					257174.43475407572	299366.1073357535	373031.5624197775	379873.8033156482	428931.1068235302	214102.8765369312	179285.89655287305	290667.11852633074	193451.31941776388	1322824.4795573538	368128.00350669306	329738.6569034061	282976.69178339315	329328.9330185451	492808.76307811064	425631.86004284624	597359.6100454845	340088.6385166357	394421.5884656032	378210.7738906654
A8K7Q2	4718041.889720493	2506735.4807116827	6503701.150825825	3147862.183148544	3419162.34651648	7600306.014704632	10674040.830207288	6249507.30306848	5958099.716088097	4537675.298808847	5306214.676477435	4949632.661516429	4133951.3022931283	10574028.212882148	3887772.5650412017	4597165.0544203585	3835313.864763285	12458769.882344313	1952286.531911509	3619993.1864983696	2160377.4563101917	4697257.509778264	3896003.5192071763	12729814.302185005	3638040.2308348664	3305216.100311005	4842003.898544246	10603743.244171463	6108043.0559202535	3334605.0553442263	3199021.3557648337	2478523.2256718264	9616621.824847296	5630943.998625685	2166371.756977376	3439026.429931205	1960532.3950791552	5769084.544935609	18341554.77756541	2713457.770102288	4456252.971520522	4606020.264291631	5966731.709502928	5620191.273300757	6230752.641245348	9194218.405110296	2934735.271714558	5584623.845852549	5296704.3683668515
A8K878	35648232.51924549	23883483.901948564	25611848.53791702	23953195.94421622	23369595.95754372	23471342.007851753	24783802.0655988	26594753.77862861	21211811.796294063	21371789.86281613	29999245.992782176	20874981.174125444	25067205.550220694	23495192.65976923	26750219.3508758	20975171.995686725	25826211.77404555	23617193.660173226	29592242.65536885	23702194.35717601	33309602.333651546	25756056.065714985	23177207.308245856	24100765.39783941	19628283.799875274	24611575.03619569	23384918.731870666	24880797.56810423	24576807.88803531	26473846.12611936	23636634.41680636	24268420.17606384	19276930.38718373	26477658.27690685	30161733.83487004	27376041.53011852	24073250.689923786	24312685.42034302	25766396.28360265	24550108.09420411	30015017.480564207	21128796.551858354	24298920.48716041	26780820.391507976	25259481.4917908	26901488.270003393	21571245.439674888	28400153.5263786	23208455.29728557
A8MPS7
A8MQ02	657832.102284395	401843.8272417789	609948.3097437632	361864.66077134653	456549.1600689533	484462.37087934534	548896.4742544575	610499.3533880799	603753.8191214433	524935.5764791651	492783.2894878977	551039.7654602237	545216.1576555672	515445.3850079447	554232.0408417603	538178.8732681539	338269.001851214	440391.2171717496	686838.95621154	598199.7698187733	713863.4195417912	638971.2560198457	355412.1586269721	559411.8996987065	397986.7254986868	585732.6962988104	486321.48967598454	579437.4129882703	224774.1759965175	718639.151708408	497224.1536696102	403505.5889547211	453075.9210440404	410823.2191253098	529183.683029109	465154.4190364579	999143.0519968572	500794.8045359818	516223.542847464	485454.2304434223
A8MQ07	3928538.301584226	4948784.416894588	2947266.846115771	4239798.527920077	3774480.9847288188	1589291.4933564544	3774480.9847288188	4344600.467573705	2010417.2962545275	1173536.214452345	4821700.755919865	3735944.527866568	3602281.6771079362	3596175.252453988	2071604.5638517318	3135818.6827091593	2093146.6730476024	4345908.501633113	2182877.190879221	3146335.302946513	2448714.770507668	1792494.8243171258	2594535.5717805307	2703848.491809863	4587981.7857130235	3829903.2704252712	3738765.269629732	3314947.2254678155	3807342.664158977	3913402.537050086	261318.30153632298	6504533.481371895	1782479.549435636	3795845.634367103	1121322.1173804314	5179334.61537684	3859681.9068522593	6476248.078272479	1890241.3890869447	1860902.2160681381	854194.9812122773	1686714.514375088	1243999.185716705	5485687.646613304	5646778.089103793	4198643.444114356	1581755.9253143047	3142993.9458756414	4806803.497300836
A8MQ14	2626985.7030523117	3497572.5713184117	4293477.707631638	4766873.262653825	2800236.8211152176	2961937.8646405963	2554272.7338046986	2779761.6889805105	2899042.4587498805	3641423.499649431	2806445.3311514435	3490611.5188299767	3005915.305684441	2990467.1210303926	3798896.99892612	3045779.157791714	2760402.20518255	3127014.0019725123	3773350.976498208	4022707.283914032	2897744.031855195	4342995.573039048	3324645.227726232	3634788.7366439463	2584179.436657885	3703693.192201695	2738128.319239697	3120219.581325844	3106892.036616988	3368300.8072450007	2603747.828625882	1908215.1601514644	4113991.4543401375	3160323.4032659368	3313828.9070510115	3067363.019441905	4670435.170279733	2851004.868437746	4043227.285093475	3089449.351768892	2341538.9797414336	3235719.6708436217	2734846.772478892	3190654.5678920406	3298443.552624123	3614515.569697314	3355796.851384719	3253541.9568839213	4037873.4723906517
A8MST6	3394948.0188657437	3834294.793088665	3693439.2010815386	3422443.296200158	3729541.9069429077	3917205.5669807033	3452342.941351105	3472122.821031312	3449119.9281922136	3413270.1049017743	3309496.083048345	4219128.938328329	3440659.0434745317	3019326.231530561	3176251.2731765737	3301745.544477707	4822305.82079299	3799407.464964532	3998117.7386716236	2692288.95329839	3009175.111775521	2755692.619424993	3521440.92117865	3463499.9622823773	5192599.53107253	3883663.9424869837	3801574.782170157	3625101.493130304	3059164.8336186837	3466812.9777211733	2865684.9814150045	4347217.267289883	3365406.5828448064	2804906.224758881	3322928.243027998	2643141.22627412	7948926.312826303	2331900.560320782	2448382.045604606	3700226.7347870213	3614662.8590761432	3580938.7783273314	3142844.226994318	4347258.18239688	3843834.7089304063	3506667.4010734074	3980985.020613554	2978849.400035853	3625246.805958444
A8MT69	1475059.7563275641	878894.3484811134	1087395.9573929217	952432.6332661394	693980.1144555396	942536.3214489258	960231.845707354	1335352.9931360227	1051545.5442508464	858402.6917213531	1391024.375270833	757553.41579655	840328.4221431463	983243.3932072282	931609.0807376396	997362.7759387377	1133653.344899163	1120244.4342965956	1203699.8928230235	877112.8664528762	1346895.1252121918	992218.9085718484	605589.8796215637	684631.0469145753	496266.415469201	914298.8925879572	1046706.8621951159	740015.9215851396	2310412.5602705493	1098840.39806923	848076.9247924581	1228613.9740967723	825559.1016293074	1010516.8189316648	1052247.9629069795	1124947.0146286823	1152893.663082739	891649.1486490369	1070611.554543176	1030768.6976255677
A8MTC6											964347.4650969455	415499.9003713731	249777.18731752675	353746.0031312385	241646.5591451309	255300.38403150387	281099.8793617196	314976.3795952635	314493.77017365384	285624.34268931
A8MU21	465116.25207671255	508967.09102001274	400025.464724064	505143.90030633	386277.42539001297	396472.6006265002	375966.3958894749	400739.89935237844	448298.0747453104	361040.5048709055	583104.7392399828	429529.91283839435	270578.3620105392	543991.972606721	617640.1165904	356250.69276706385	259947.88779545523	450476.59275063546	338795.12617352954	397727.3052090784	428076.0081219056	426752.91908232	560120.2942725428	499182.5933636316	366919.05245786294	319027.00947926514	399535.087410846	257915.4168680083	735713.1110975386	254804.2674977828	517385.36095848	576125.1631876754	483609.97467669257	450136.92561226134	391440.3144141167	475274.1056838729	205584.9886990791	404475.367585272	419475.61266924225	324537.4073163051	515602.3725984689	522061.6171427108	490174.7831602206	285084.6713530114	344364.16071960377	291871.426888229	600527.79206396	515329.44677265576	446956.9786427257
A8MU27	28317852.816814955	33487610.58854112	31973192.53422492	36888708.964713	36325021.16670988	36928416.939917214	35004234.64147977	34326441.5647301	30947116.394961856	37524588.06763601	31173701.1647946	37337361.31532314	37404915.4907038	43404466.7049871	26395821.650940433	38212017.651302986	35636452.73608035	33007251.88809433	25005016.59672021	34146206.08459859	31223079.79846695	27786400.664749715	32646628.017854724	37627660.7338431	35147357.38961925	37181206.13188281	37537202.61187729	34808868.93323105	33332358.94243426	34432446.425695896	33920374.86140013	31585207.16910228	44397101.40331769	39505895.316511504	28519842.328802597	29863739.522567797	32644755.97824412	34058331.9561562	33913755.70786386	33314199.748078004	28608919.19765124	33730817.94870772	37936806.20322901	33168859.430398602	34487261.200129285	35064399.76365977	34889537.51651451	34549701.03549697	34403325.68373339
A8MUM1	4188071.2094745594	4575198.922921173	3964995.0046913936	5781663.498733934	5850847.61644706	6120271.858242813	4943684.1775717065	6034983.806668152	4658566.849136533	6369515.625087163	4716932.274095443	5281600.738088793	6370417.475372266	4926269.834998962	4547612.172000572	5379130.725637502	6472622.869540579	5186081.678118409	4673918.533195095	4933207.535144178	5902414.284039535	5538279.448176782	4767512.997621318	4958317.062977128	5135207.208360693	5318137.505050039	4943432.4044021685	5497939.866241748	5155549.575079803	5271002.7528960025	5966892.1818222515	4194393.688168713	5816716.7599973185	5385863.280001537	4813502.090594842	4988414.579309224	4985200.708414138	5215528.1225619735	6076381.9459159365	5044900.7950410405	5721538.033460197	5368725.725458049	5566286.153478384	4507969.766645837	4825464.682695601	5085342.82962168	5435262.245450255	5456838.399578162	5012779.450934528
A8MUP8	288575.2303039931	303406.46331324725	371527.3165414125	300096.549013936	307343.14861817274	335385.8693412736	339583.1223676342	500557.63524775405	311392.51185669185	360724.31965812854	303509.0615399544	351552.8850467083	348886.56811518385	382165.4110199247	366959.38551194523	329380.3547740315	251545.95261881684	357276.44507640915	377564.5107508657	349748.610431391											93187.73663358962	280408.8336451754	172275.673048907	295994.3297343895	594980.866564371	482968.2444206872	429446.76619779353	365699.7454656157	312620.5935090269	390990.4002214021	283389.8944208786	318599.101440883	336003.6526382715	428885.8355709775	315477.2324572014	312687.0291496951	340036.28609779954	344574.31487340416	368122.5778818491
A8MVV6	297934.22446835967	205066.34867772055	153401.69646692585	149337.24288667674	114765.64322402225	207692.18123128355	207887.7219533574	313130.5320123837	298590.6826067505	208334.67217524047											581688.5916921446	145855.89696209534	222843.23836371585	217214.87762721613	58661.963339934366	213927.51648908356	257368.83173112365	126206.44288643914	210905.8006954465	121599.15644284422	242622.73117624852	214389.97359970625	173831.83328231945	381878.7440568594	92678.55337477784	219102.755968532	64628.479707527586	337132.74855304306	182302.35429164654	247710.1311818504	363420.630306161	267627.5027672315	260229.27215220305	132714.485985628	143509.38851824813	125967.67190274045	312575.24348495144	210407.5398815005	232078.77201325836
A8MVW0	1163513.5837095564	1376204.583994565	1266001.333887681	1339223.3946808558	1540323.7938734854	1300877.2443602595	1271148.8563289072	1432688.5212541341	1527252.5571126183	1388442.9631919079	611735.887988734	1426907.1139394785	1086382.5963808578	1877067.22832282	1808790.739918772	1200790.3980233485	1029688.0882087	2039715.4075052391	1067937.2204559941	1456702.1155545437	834520.2050934256	1061521.4311509968	1515404.5345668446	1648853.4301919462	719399.8597170761	2478872.4843405625	1985109.8655462663	1063141.163498561	933988.8210480502	1364905.8247568563	763417.545198302	1866377.191640773	1033351.1730945631	1512556.4291970334	1809106.3739856197	1618999.386358209	1463428.91050726	972176.034017652	906918.0902539886	1659381.225063245	368567.6656555253	1436458.2400973917	1980496.7543294518	1193690.5902833086	1178780.2882412462	1627072.16212688	1505643.076112165	1445510.4616320347	1102638.173389847
A8MWY0																																									756196.6111519723	844801.3908491071	645056.2950189608	834733.5180819972	991526.1064457585	1283306.9330277524	844088.9529251773	1132045.1127576549	965615.8640544252
A8MWY0-2											572705.6017790292	504261.320564465	474685.1936020639	479505.86941404577	533837.447526866	455355.91377624276	413716.45313941344	388285.6416095379	815742.1852275471	504214.7439865713																					18319.012173066363	79031.35187335688	218145.7767832066	860505.9445303858	693815.1514759302	886433.4610215698	387793.6906718319	106088.73720245952	149818.44547960462
A8MXB7	1435731.159543515	789355.9550406705	799391.3220971028	618638.5649996497	602493.7036472874	688502.8391251592	593550.1473585689	634504.6661559998	668745.7102328081	643912.822771405	944594.3906010487	889831.990338247	733302.8308076373	826930.0737798538	652736.9614121475	732971.1133834666	552724.1580246428	793551.0079726641	669198.4385866249	678984.1025996644	656977.1630641242	660086.143024441	961044.6492201659	794532.7678659782	892057.6552308309	816355.7268290645	794095.8926150489	738342.2891631221	700514.4400548806	460810.9293598215	584492.1341622039	980477.914483386	523931.771455992	640021.4729479462	787660.8665019097	809336.5863835585	785921.1666415605	787660.8665019097	648296.8020133912	927024.930990428	676796.8881851315	1015810.9982688528	559441.4784863914	678388.1479776568	645634.717248178	635613.5692690603	825901.719458543	863504.7038414322	961746.0524609102
A8MXP9	273075116.3375865	182667701.9670676	241710195.11444095	169384191.84759742	206097792.28408015	261142409.4124085	226260366.38472635	239545766.45881048	231507478.48016667	230687860.18805853	211145090.61148977	216222310.09680244	180243835.19404936	237399665.87696534	292866527.2885705	217869124.4342028	188281186.01422736	195567844.56821463	273963600.28134936	248519696.82184452	213405116.45113808	219280611.89823267	228500688.6172567	198061842.29923585	240601538.55852285	231441107.02055264	219280611.89823267	242106021.4836122	211689649.82590303	257711693.48172852	155415445.21826962	202358275.21390533	221279229.9178708	205633825.33233148	294657957.57387334	202414108.4545603	320817800.80357766	217544916.67206284	204163549.99508336	237793771.94960624	215751874.02200043	244647214.2928041	289811184.68665004	181398525.03337836	206861851.70879915	206186520.0013206	242973023.81301948	236645532.1644293	244647214.2928041
A8MXV4	86159.25775028887	365519.99057419243	306467.66144122486	383761.17320571095	257975.26133264296	239662.29128423546	412267.9564523695	135592.073020118	450530.64965425595	211062.18439562095	165960.77840199127	226844.9076239786	89424.80182117216	119789.01623876074	303378.2452151907	429416.3888432136	322299.80069703585	208340.31250003187	648478.916116291	335046.12049861357											221222.44024846848	299409.7194734172	282692.4076462921	288829.1764380882	305062.0065184925	280514.9313513084	347723.31588251324	287190.0131950164	276665.993030138	259692.9825033548
A8MXW3	491795.1577278955	84944.33974323682	514370.78996832256	154352.23700364624	160599.61400729677	230250.9488457812	316161.35139885236	273316.33765765594	417713.25896844646	319005.72731109685	473805.5488015902	334965.5693868128	359129.149348859	258958.2146273183	199793.11289587367	214664.41532520266	132913.40870493403	300755.1716396389	455788.0421682704	231717.02502968226											853554.5490339737	400848.10660977155	142559.24179324665	216784.8464373743	241941.95146612122	158154.91193830915	232295.50291716726	299248.1017488461	97618.24237534104	319356.43604423763	397917.21830009815	270150.021062729	160371.28731827156	279923.92519716785	203003.42888660176	347337.5874730461	369379.4858670185	292519.2957080092	308668.42157844175
A8MXZ4	1035501.5083733678	1324483.5776553422	1141742.1694589765	1105968.1137001263	1408533.78023824	1406229.1779093542	1524351.3443349968	1089459.3283899373	1276809.9412440748	1373211.6072889757	669399.6104019308	1907600.245258957	1089059.9108145682	1281136.332305769	1039119.1009433093	1176647.3231846837	1290304.0968855715	1391267.0427067324	1668298.0826374388	1173462.1126704188	808988.957584079	1531227.6349173854	1212977.6297093537	1714027.939046469	747617.7486832666	1406053.7955948198	1629354.1282697842	1271349.493814262	1114815.64115227	1249874.8949796804	762855.8681011689	1063920.0366356715	1418583.4597471368	1305274.7058041359	1319438.3000470109	1048925.3554578838	1540554.2465328882	1365414.9657223541	1256392.7474915357	1604934.2203641385	929552.20530152	1724342.8105511826	1658900.1548855503	1183479.400005975	1004019.3456447823	1502092.1627353218	1366300.9234920568	1466115.3580473203	816201.0437298117
A8MYS5	789719.938412476	711219.2736145286	815792.7319511207	592933.6472850075	843311.1626643164	720132.6105132386	1123234.4224276408	705205.765131042	1311851.5804089785	917680.2135255295	794745.602837323	979502.9092299243	560743.2446573646	772876.7641015308	1239062.825932435	757794.1415588027	666411.5712317489	792496.383455152	930302.8418302112	1037147.1888244159	1167396.0112255877	1036647.6579683219	909083.5163073894	905756.9935782588	485672.3184530438	1109279.7023696029	1159195.3321981593	632039.318534783	646857.465237273	479143.79523598024											837376.4826899952	952846.2924082995	652217.9645580244	769911.7377283316	840563.2595876819	818933.8589416811	1200397.8339711477	835274.5660127976	760826.0333817357
A8MZH8	488050.91017030255	1758206.9255585903	1869743.9986837124	1954369.2049662038	1055449.7777344242	1013736.3841283466	1070272.329393842	489480.60309631744	1675053.4619940554	956990.1899031431	393128.0694595618	782113.6420248572	986579.1060159235	1446549.6870903738	1468939.6270941978	1198562.4347410288	1173656.3114384653	1456778.0744836237	1736626.7535629426	1688425.4779722518	972493.8263009895	1360112.6850938052	957911.7214900424	740947.6771817064	1222952.5234781078	1474884.160535119	1487669.278692596	1451346.5812544185	1420503.220169445	1242513.1650830954	1188213.6596730035	1442190.0978979813	1100113.2024280182	1177465.5731503204	1128125.9318690272	1248132.1262718989	1824128.007164667	1287993.1400686214	977821.9817565446	957172.1147365865	769367.2757620191	1274549.6603997615	1434387.896905634	1337717.650698008	1231254.1785038132	984236.0384989484	1192199.062498957	1696482.8934121588	1140793.0394938572
A9IYQ1	1875123.0090432053	791496.6308886048	1679439.162518319	1088680.9424559812	1253772.6402806055	1588697.6986316254	1438625.2775882469	1393374.8924139806	1772707.9085557032	1454390.7043377918	1495214.8216550003	1457366.4519377144	1113849.38410199	1411757.8049762372	1643887.665314849	1498205.4782070015	1255962.2974948923	1392493.2570805685	1550830.1419050402	1516839.2199407157																					1291054.505469115	1660335.4860642594	1967478.241167041	1362300.0140449277	1150479.022372867	1432325.1420532018	1508019.6329511816	1229448.4585913306	769511.7392543914
A9X3U0											227104.60719426192	234637.5251959364	167846.62361048965	178886.16108167352	174184.76544942276	196608.67416233782	187147.6011338001	186691.06064885017	130546.29462734314	166229.30465848604	101507.20876334213	283882.61973766994	195896.97981897567	226326.9283622845	248016.3597708132	180414.09697614022	228146.47407488886	81536.8573532249	77721.39278532212	226326.9283622845
A9Z1X7	11115563.44663064	14681453.516540205	11187579.545251165	15669570.222319456	14612794.662786832	17393910.740974907	14339295.321958333	14123247.02609676	15362894.925946666	14448128.639536535	13283122.514496053	12618463.120524405	11697129.573681625	14203919.73167432	17493898.139497086	13435771.48809403	17560755.673019167	12567012.20763923	14785800.68276758	15288565.661362765	9841099.319291202	17920667.624967396	15619853.474851776	17278598.976605944	15475081.308278555	15418781.02127786	13031267.155587316	14220934.479207356	11995096.498220993	12133052.649418823	9440160.831010437	12077183.792775204	14608803.912248855	14352954.277969567	17883003.57177831	16164171.495288273	12863951.44748382	16058168.067001196	15528715.476402014	13957318.253130408	12324392.988245558	15883701.771576876	18136440.54118064	11467354.733093718	11912083.60458376	12404065.495939702	14789197.69532412	17286698.979870487	15181741.351364138
B0AZT5
B0QY95	2028045.6212701069	1855833.955128289	2088982.056981827	2028045.6212701069	2059654.87778086	2076968.5399822409	1924952.393077517	2023058.496096769	2063812.659622638	2076514.2440484825	2433936.5732210213	2211416.576485117	2214804.0200049807	2017748.253866676	2273208.2186233285	2027606.8825934532	1573525.919175523	1815295.9397760357	1612539.9238525794	2045782.2692034831	1502484.6044297826	3589249.874362265	2535407.8941493705	1243076.5102187071	1436067.4218615743	2583941.4337063846	2333461.550922512	1458796.2527814326	1466758.1486425803	2076625.7615281143	2496378.895302453	2613545.7762083174	2201132.8040371486	1906664.276527978	1846875.5171963454	2292197.116797021	1511857.7052016775	1510070.6393562856	1914822.041998805	1932312.4736771104	2241440.8159664865	2202504.9220081675	1938877.972711827	1866619.8626671843	1869282.7611449247	1981844.199501321	2196027.601386636	2228345.8327766233	1839199.2053693663
B0QYK0	35570875.22984121	34494292.503048465	37137642.5603466	43111803.7891327	44000873.60855614	46703354.89129883	45114635.61870658	44949753.57946806	44251429.64857546	43494912.05677516	23875167.82910065	36603879.4389864	31543297.28487261	43808471.54715077	47545516.83018865	45229027.86307479	42541732.97329333	42440617.15188498	57117646.90224992	48124219.85214369	27759137.972179946	39095390.33362101	38029637.71504624	43600530.65149609	53286124.76671919	43638661.33552381	43770212.19541945	43121820.88540429	39095390.33362101	47432664.39628192	41315102.78556452	40314116.49492959	41178753.63792074	43689151.21396234	45003085.01942968	42099110.38451631	44251853.65789228	39100740.18584953	36026329.11638141	45851334.04371365	58394045.72613593	39888483.77304441	41385865.69706991	37908013.33625489	37342164.64002931	37150661.42481012	38548923.59422467	45587388.49931627	44004859.819096826
B0QYW5	2195663.43940842	1283799.6378444016	2122887.89462669	1355588.0064666322	1380669.1681934588	2041331.0735424324	1920654.5274398562	1769168.9021268443	2317109.0646120016	2013724.5774540948	2208588.3967850497	1874938.2762047497	1355934.7025160769	1946946.235428611	2404171.9461693643	1570220.4570339816	1211819.462745287	1803615.634110053	1886520.1356876388	2137841.818364144	3088074.921243955	1488965.7956821916	1792875.3740050013	2270003.855066833	1769819.3407438758	1774836.7158576963	2048522.582185352	868734.6086954805	2337141.112542233	961615.7789572666	3626995.887876772	1859418.8974868408	2318830.9509583763	1594019.075545273	1493367.636014591	1621774.1656613296	1355250.368892005	1807675.5518126169	1541263.1399361328	1181996.231027822	5142784.043582849	2108382.490665269	1731322.8917057463	1002866.210968678	967250.6932018352	784586.6119350974	1843645.15535939	2258363.9132716763	1930694.9096909638
B0QZ18	26250122.57631519	18722875.046605848	19863243.69366682	19503438.709129214	25488405.74932081	22649904.39093868	21890646.436325386	21169157.691189013	22358403.569078226	22213137.378782306	26071058.89838208	26711441.18156871	22987070.12991137	25464138.03179438	14001641.315339092	26044274.76515755	22634144.49214867	24640871.79926525	14170909.929651668	17383782.844125886	30702271.005449474	26071170.97827433	9788115.998556027	27290410.87442493	10042580.640493236	30166174.240479354	27160775.8350542	25678913.229833584	21304848.194514208	11904072.753250385	27629687.97432835	20088243.052022204	26674476.69234335	25129477.175380263	15404366.2591766	19366543.4805131	14619307.02786799	26294235.771890946	24193692.747694746	20709303.22209448	34182553.87998351	29060505.55708572	28143742.49650603	14552663.523871798	12316157.855363745	16091944.041116707	14759273.646901164	25924095.34634031	20410720.356894266
B1AH87	1559062.6890369381	1252010.929709507	2086489.173139525	1379501.8262833965	1421858.9991582744	2326708.8624734855	1376566.180638603	1542639.8485440644	1911273.0659402781	1775394.6103812645	2052930.485202644	989760.67804863	1239775.578071793	2797663.394480602	1930100.959598796	909046.7093148241	739944.181077103	1905030.028528407	2827955.933137234	1239297.607083761	1967838.0134399286	1145467.089018408	1252780.2001324121	1561858.2918761063	970037.0316614629	2028265.434282817	2250649.230808223	1446311.2641832854	2987210.495676948	1021090.7168949958	1709257.2525489142	1198764.6928741576	1563069.854893439	1586056.176288931	2149501.371471106	1824329.0200226863	1682626.7582492589	1592783.8801120012	2053771.7524886625	1271339.797865533	2685901.303754398	2166802.403186856	2497113.856544733	1346154.2891649243	1329587.8029460032	892397.0567005692	1625630.5200354266	1895080.6977805297	1600017.0874416332
B1AHG3											1399665.6151391298	751341.9723528363	646107.613661305	432066.22493283474	250827.47220328078	666862.618149003	515497.0190141122	693617.1161214262	100380.71441289745	274241.711640965	1167958.2173165523	658617.6522436889	456377.1270973095	285055.1948260164	751408.311952968	237679.70651042255	819705.474463594	438720.3223665235	670574.8878456516	244495.4703278773	1288931.8960335888	750841.9779785108	583691.2161782605	627951.5643467649	134589.9769947097	314196.27394445357	503756.19941684214	567113.8348593535	488591.76536561607	470952.4236799169
B1AHQ6	2407356.030269872	1760742.08290035	2125759.420912377	1165433.949659303	1759640.2130667185	1628816.125944491	1388149.3897821058	1615593.687940911	1711318.6297376624	2722077.601500919	2184874.29164219	2051566.7749008348	1986596.1922465884	1693050.3473009788	1573544.87143436	1847790.301498225	1717849.1361897325	1705505.8476025702	1662192.1258330727	1861928.9775162474	2743004.31163236	794826.0427476347	2743290.7937827893	2211517.6438576216	2497626.1219168142	1566559.1330215326	1758751.288722592	1258653.1000383706	1508889.0305655438	1201780.1653053155	1451840.9776187532	2143332.7615730218	2020206.3764132329	1567316.5394774075	1882750.9069352157	1536376.091347733	2140577.1684349016	1746721.8621404609	1955239.2158391888	1840541.7038077682	1633484.8146806643	1620634.2279032732	1559885.9995010598	2154488.4908667607	2009218.4485241603	1637135.5495606046	2217602.395471175	1698613.9249388063	1805945.5304090627
B1AK44	19194459.91212827	6016684.26661663	7414452.845492503	4829994.830171431	5900716.269436671	8618122.177219251	6465917.806903056	13999185.275623202	6276675.329081682	7264594.373034959	17402156.291051514	6554933.954629247	11618476.127837235	6384890.711795623	7702095.089749245	6383720.210274931	7702095.089749245	5437886.702299303	9431803.711953893	7362747.190541555	15373563.835639948	9898150.327667426	6932912.614500468	8968629.753476128	7383545.706405793	7009586.672521212	6671473.452765468	8789006.102074893	4606809.919275398	10347122.609651728	15648450.035832316	5887066.110916788	8145194.466649372	6830913.446808641	8148886.395562823	7528413.971366348	10513243.345083432	8325490.005443307	8291234.994906142	6661914.449267408	17736381.120477706	7034323.849914935	8008709.641401253	8073455.384548113	7148664.07945481	7553513.188492297	7201269.995761634	8029977.865167517	7524998.711495932
B1AK53	1697456.076267536	2126426.18731471	1309273.7038596221	3008178.3166395808	1169070.617209903	880761.0253953179	1556693.9053498642	913238.7387791028	776517.2223434516	897660.6180402453	2392835.529208041	977180.6861203158	1195007.7159783598	2624525.2057954688	1079383.7286742069	774371.5235524381	973884.9098145554	1784170.2019771868	1420989.243912512	1112919.1020122026	2987711.517316021	1840666.6064401213	1367770.9900594265	1617258.699564455	1171297.9613091664	856047.1727447036	1066007.074091668	1358131.9571949232	839178.8652318228	1231192.1131002945	3063423.577429662	1762268.6320894847	1311431.9659246192	1097733.0422805853	477160.2627495768	1103833.1451421108	1799981.0906668962	1200097.5762598305	970457.2508027948	1548765.031936091	2240190.611138107	1557790.966616707	2242979.019789568	1186679.1242766886	1214816.702486895	743668.5873448849	1120348.7972646407	1561677.8392823809	1342238.5281355171
B1AKC9
B1AKJ5	58099498.90491682	46239043.28645116	59814336.60580189	44406320.46361687	45555660.5226752	45440008.67773178	51340645.5666377	50345561.14076598	49571571.13846883	58783136.90035059	60410160.91732757	58320572.49429421	59083672.35847468	57985826.18533896	38788643.78191537	52382879.34961812	52330143.80128905	62378737.73680458	24695068.49097173	43220077.82744242	60024466.07497752	57989422.47271636	64724472.62025631	52083581.67859556	50370368.34891819	39543547.36819064	53860982.7634697	45239400.19044928	47940634.88831326	37818906.67300475	72019118.85532323	57049818.98119412	51426930.44490589	47345410.65438704	35119742.89103462	56923314.12411058	32589848.449022602	51610150.66653353	47581910.48134141	57929535.50057016	51433024.28806458	48379133.90255726	46904574.37715347	48856425.53841165	51102218.49979965	47690359.38740154	57384618.16198055	48433459.77980898	53397486.81368477
B1AKY9	10115053.91170478	14648481.79809599	18168481.568294384	12927866.475779954	16854696.974891033	13211356.63023639	15359469.739728484	6717876.027351962	13844514.451546036	13266802.654136386	8843003.77307427	15585878.723530134	6012565.977796619	9853149.498644268	17780729.85129241	14897112.247555414	13825397.023641901	15939057.604137998	17090204.246793587	15287503.46232694	7473122.7174034435	6547163.189416252	18012955.431168128	9613266.397095984	26110116.965457894	18236600.40235395	16893863.734265428	13951296.63425471	7312410.400900142	10963804.6339468	5837951.740493713	5577443.978855687	13804664.590841135	14162966.2330396	23347549.91276061	13591220.873293865	15113707.22421968	13735487.54110975	11450279.87263275	18493331.294857334	6760549.3983715465	9486002.07711653	10511941.24036155	11191409.832834778	13291853.057494	15152976.474680353	22803806.480539426	13770371.298123801	17863264.94982643
B1AKZ5																															2812431.799680503	1280268.3707931363	1703142.3063737429	2369435.528304425	2069246.864301062	1676739.3627390775	1703142.3063737429	1408807.4127836078	1393502.2422240213	3164145.838675303
B1AKZ9											504733.44189732906	177345.0321902353	194532.179765086	111280.61866319033	62797.11212553003	68357.83668192626	106348.10569181397	70939.81635432864	154837.6238235893	150377.02099024225
B1AL69	1963985.065933129	2469678.1965823392	3314886.535785065	3755671.4574215324	4001580.4978431137	4180253.023292493	4471174.298328332	4441326.807466483	5652771.926433503	5639159.050533673	3662416.996761887	3914487.811062012	3429530.5108895493	4986189.953548376	3198494.0860395986	5559634.465860035	2804049.0104514896	5266842.199708474	2451531.948251155	4617309.905979392	5436302.204709348	6002418.137692948	4042059.1709728055	2888565.7430308824	2854847.9124245	4153950.8254054524	4526028.159963148	3473473.4605881018	4832710.084204641	1680130.506076998	5391672.376865671	4070912.588910442	4347012.913369927	4000111.0293747517	3099298.827151223	4332900.897205992	2062485.8120678691	4145352.4277674304	4209778.949200315	4230964.681885393	4253107.418394698	3810287.936129422	3291781.064149439	4038425.4452367006	3915064.6504885782	4125996.7201853	4084361.76263732	3810287.936129422	3926645.2347072205
B1ALA9																																									101811.68723308084	21640.049901696828	1568793.6406887819	39791.969514997436	155302.6125285659	35916.3241144994	60366.352858414226	42922.735739554846	32335.269283915502
B1ALM5	836250.5639635664	772422.8024851094	818537.5966633247	769292.4936087733	762581.4167738974	791281.0047401079	838159.2888881614	785020.3869874362	874348.713458483	765710.9621602633	759137.2299647381	855307.5703521225	667877.7554260752	616205.6813046365	927458.8001448056	905477.276336285	872340.6691084899	578853.0534916103	704357.1317593097	1126588.30693989	743934.6059883367	899940.8842536961	746431.4294091016	836371.2951955507	619997.1455987763	802030.2905459431	889612.7625545659	686097.1244732086	687439.7802940954	1101752.382254697	801405.8171195082	522403.0030869843	807099.9010815526	751765.0851427125	908673.5988352494	839293.3757900335	1080415.9312596759	693517.5262540573	933464.7643930728	675566.5615583307	1169621.664450567	675687.3018817251	642254.4161437192	918673.8735912598	714953.4745233539	805512.342352012	789716.9447835811	796301.8893462915	683796.7352177962
B1AMF0	2323601.931940561	1990553.353444751	2497647.671427729	2020051.057469519	1778545.9569783825	1856993.4448751025	2064684.519383177	2295285.83846264	2307119.7416014317	1844689.838002232	2013743.625619414	1996036.5696010361	1961374.7181140813	2155863.003335543	2791465.301720705	1881577.2336391052	1822206.516401016	1880304.1773240587	2425635.209733178	2050963.16297569	896622.643141594	1890099.9774719847	1935411.0202610812	2690216.9553389754	2215753.620626081	2650041.579573018	2406845.308647222	2575187.986189655	1754914.7617779688	1964081.0060698632	1674420.2327461785	2134033.752482994	1374917.477686952	1841764.178982709	2826825.4302724693	2782568.166835556	1841764.178982709	2112701.996698996	2079600.9963445181	2310572.421040213	1685837.1784075415	1775728.673386909	1902319.402691952	2542848.7303290884	2277260.72149223	2100055.658961146	2246628.619604886	2271825.993738024	2197825.862296914
B1AMW1											146150.54528679745	223817.78881081802	177292.0330863447	207796.39463849604	216032.4168609312	230468.76524704872	137386.1744689608	219559.9207184648	184222.72348484676	149297.32736235048																					155142.61990969902	154184.9494164292	273024.21976837504	190899.56851116935	215699.12159148595	199694.86132359155	171916.54173966908	176634.39085682004	164202.30028161278
B1ANH0	2269928.278159058	2129000.111766261	2150054.4402394025	2453845.9874345767	2320961.2536904067	2502137.146061213	2162211.6170029254	2272509.1313267336	2026241.4053796104	2091713.575212216	1981861.0809036554	2187042.692490515	2533026.467970676	2309482.5889700647	2077746.3137387028	2564249.756690415	2266587.7375622317	2499098.6477184976	1734825.394199621	2224681.6236305246	3278815.426475302	3285009.512146185	2484266.7047021883	2474656.342549749	1955186.9654205332	1350072.442188152	1640360.6494947097	2420219.858865261	1788065.7693388343	1701944.1551071391	2767772.877798981	2593104.647538266	2440546.319842199	2023829.9312550055	1990001.780331095	2288485.464953836	1702418.2776727257	2070813.4742048816	2023829.9312550055	2477801.5056636296	2931249.90516206	2088646.0225360445	4130926.75281706	1781852.3030043952	2053139.4415840332	1827414.733055873	1859428.8634224404	1791587.0072224422	1806941.746865341
B1APQ0																																									1118566.6090391537	1075266.4225325536	1079596.4411832136	1027765.4716633728	914306.0575872731	969213.2791634036	932793.29841127	1128777.6977974265	929726.0941551459
B1AQM9																															105661.78624690426	51892.74726228852	127022.72725941124	57299.38821511975	44826.228381386085	79655.09190049059	55325.73674183139	68199.44729011712	66178.17419951082	64125.15336402588	70180.74249308615	43937.64058045362	133215.3215156059	57641.41526975972	66424.13371153444	68132.83379748282	69822.54832692067	66544.3755694345	51676.15341414877
B1AQP1	2534201.4487652485	4872567.288119649	2849415.9508930487	4594203.042491334	3959214.4318923405	3345508.7561876727	3122968.471704076	2741887.819438911	3539361.616843232	3441456.9350236733	3889606.2348843007	3676871.439586448	3531042.8775951783	2644692.685615384	4505843.816383766	3417392.881565336	3088942.703875527	3012316.1020394354	4421155.297520831	2812918.020908846	3276702.9461658467	3805381.604157465	3909693.9292825935	3456115.8964065225	2705322.093978403	3774895.211783827	3426967.9310151427	3821952.6048901724	3019002.6398994885	3804744.2579754367	2777273.332572578	3854168.464674951	3731772.648982765	3819158.726160195	4173570.107522837	3556170.8799711564	2098703.850996695	3694722.0584124094	3532056.7472816883	3763187.390651614	3079676.9181834105	3341521.611494326	3208428.969748993	3706300.300496465	3741137.76453654	3560061.8713496025	3677681.7183866515	3543725.4683094514	3728736.078308681
B1AVT0	1432962.7933497597	1217262.332628105	1388022.2669718212	1235126.0160396798	1255521.5600922657	1357288.2919684423	1325218.0571823078	1466151.2665856741	1702465.29269289	1338193.8429674872	1417667.856751464	1185307.2155974586	1060829.9795513721	1299442.6873194748	1968935.6040460488	1287549.6583467934	1241058.7269081306	1417667.856751464	1602503.390034399	1237251.0773160865	1062050.1813396474	1530537.5313962125	1505380.5519697622	1320277.5710272032	1407262.875161177	1254259.3268395	1219384.4409135652	1563880.0789657596	1044369.3541505585	1810811.3846158425	1026271.8509405464	1307699.0708705087	1883119.7893257518	1318299.7979807954	1375223.4940782196	1493819.128624551	1428227.1296296525	1347286.161172985	1190207.6787314992	1348059.1308581105	1307490.8368482895	1584427.8248400746	1293786.9976967268	1180856.0479913035	1217755.8350645478	1206393.592281773	1456158.6331484988	1648075.24291786	1686405.132471371
B2RTY4	1232810.0778854636	1804457.6746431168	1243273.28523994	2178789.6450125687	1469569.0253733462	1339026.485666867	1067973.3033483818	1367247.4392570162	1097712.577248644	1159369.5846245491	1191009.0844535423	938576.9555219987	952939.5546601587	1803356.60889332	1770048.6076025215	1535427.9914179726	1111164.3721394287	1604973.2082974843	1440464.7536952696	1612296.24404227	1351862.4071257021	1476884.754216491	1340672.7994686952	1322740.7359157994	1085176.757967037	1523364.662945597	1452855.7890556103	1125918.406359216	1846715.632931412	1434062.986452176	1064463.5948937677	1118665.011724582	1002693.0132789036	1170974.1373593835	1148875.2746784657	1080730.6595612438	3644486.447337757	1153523.0074406015	1406824.4429770117	1169015.449981055	594516.4780331308	524331.4895698825	527620.967817049	1921735.8780514768	2427011.079844672	1797331.2136521759	662943.2970884107	1123583.681976089	3744333.687550422
B2WTI3	5420166.270684852	3322655.5295685413	3549501.0060395817	2967519.3205517987	3104839.7575696073	3388413.835418852	3117591.630297393	4406220.0662214635	3269166.5931536127	3332029.879249507	6314079.312550028	3695813.9969053217	3800920.1889908295	3653561.3076869487	2954254.776344708	3545161.788249429	2645592.925586936	3653070.812123883	2518449.468560834	3097199.1975809983	4783837.776247766	3538649.3786592404	3961558.4801754076	3385349.774508151	3281679.680913847	3655354.8837549086	3701671.144802621	3251336.2495889734	3717416.497693495	2601247.025017935	3860890.4650721033	3565559.718492792	3218565.3687259764	3509732.183108086	3344639.982474585	3612442.5106390635	3302152.4520920264	3823934.7957233833	3736807.5988911563	3903377.995454663	4050231.3546161633	3787531.832286595	3389600.2898415606	3860777.11782282	3991531.5992818326	3703545.6303201467	3798143.3400851293	3235138.1470570425	3202081.87676966
B3KM87											5283.212310950722	18312.80289496617	34239.92233308743	25476.334144194414	151004.47355882212	23112.253616327875	549189.6604881798	35565.622074726874	118384.05080148	56191.37856564409																					70694.12504854442	48649.712882464475	130424.91465772649	21337.96444194872	102399.66811659117	180447.33584247	144610.2721522584	32490.2499711985
B3KP96																					625130.6313584639	504135.7321650352	448401.40389998717	399637.49709591456	756174.5548247987	933426.5638928486	941965.3301825431	615197.7807765743	947251.2331237828	898719.6737017425	644555.6335455042	677128.8703859614	517495.50950153795	732916.204184924	701028.9775975943	934762.470984553	497969.942671901	713536.4145340766	798270.930978395	852392.2398769056
B3KPU0																																									113707.00791381414	104257.72741498527	119532.39944332473	133836.17288341234	83888.83439890515	104473.48265681902	111597.40110477331	68913.82242866814	78399.06213446928
B3KS98	58257751.08229012	51776459.38212863	56345843.81564569	51271328.03400789	55772852.18936287	59377544.91191488	59194645.68311594	57319010.61838471	58610122.374583304	61315403.42561896	62904159.67614514	57016526.56711985	52255121.25686836	55300522.27902608	55426191.95291072	55935447.42063277	58383073.17649058	57567197.92453797	52255121.25686836	62197601.0429182	55649631.30124568	52309806.89864432	59858194.81619771	63331217.62536585	58227521.25440176	56080913.27059498	56647639.16420276	55566689.71920635	58016424.76981735	53552923.71058676	67526461.89385755	49105012.50839786	62121952.12256693	57140536.39455103	51043555.45479842	53835921.75814375	57440726.51265854	54707473.73438256	62017538.16844258	54301782.01679523	61223934.20381904	56650231.95536827	46202731.03449821	56395353.71214856	56749720.63027256	56620956.57973854	61172047.76571106	56077815.05789265	59716418.96671671
B3KTM8	12491026.16729489	17034441.51792362	17738925.22081721	17883425.87564672	17621629.70531966	21217315.841386884	24014874.84885337	21120680.37396052	31409705.95789447	23136164.55664987	15635398.218370065	21341248.12532334	15450692.671480846	21277173.24238676	23751694.51621459	22812131.80937312	14971255.664412312	23711823.774042346	24641852.17297305	20074918.68372244	18444429.65877431	21238563.926716603	24903587.90895746	21547197.525221106	19866144.614848245	19152015.04912343	22420944.95802433	20111629.778695766	16970561.33999012	19013115.641203884	16087471.08945585	21815292.012189474	23269968.25161528	23233664.48261919	18688266.454336606	21376847.157199435	17138306.77789376	18633964.48956706	19904766.708151933	23519641.81532429	18110585.766808365	22815992.47412739	23473602.705311425	20252627.792972013	19979020.836160008	17058049.766318727	21663119.537582874	20641768.64727517	18824092.867643043
B3KUS5											170554.18950741447	176911.98800295478	220139.84960886586	216105.81067183407	246224.72060027785	283437.4138267715	246286.92997890353	232222.82507269183	270050.9126138975	276688.1747795714	411132.4355851311	236637.8910971272	150592.7304353684	244258.1140899792	311521.56558643444	204256.22440165954	212492.91487258492	204256.22440165954	137818.15436195812	225644.22107148453	619782.2971381263	189960.96391517864	229343.65159275214	173248.62337893015	140316.77593994018	175906.40475962893	151123.91347470225	211293.61976555595	242350.93927709942	205291.61015748768
B3KVK2																															220450.4485527436	99686.5497684964	346465.3904714069	124094.69020059954	86099.6964492925	89155.44524111273	174286.1841874664	175396.44799291712	173428.25306507258	103228.03897520133	261669.03738505513	97327.85804168425	459335.99035765463	66915.42950175397	91152.16231550148	91463.92641746077	146018.38809511677	182302.19654839573	126578.35347806664
B3KVL5	437125.9860453917	331766.2824763948	404098.6000889031	335487.3010360316	355309.08659346384	399875.6455724808	444487.7134115796	486924.72543794115	303122.47054249985	429603.6391730324	618957.8731228003	454846.28078877577	252392.4938128345	376889.2975740804	542973.4105009403	304515.82023103995	257891.1600890989	357736.7589146136	342083.85356501624	419515.89178323135	430711.8177828368	265912.8609236701	434736.6295856297	370254.2084149414	500139.8213810136	390046.03060556186	432961.5357009074	357913.9835478878	432990.0131429082	312131.7492911192	315380.234003407	514858.6427980595	361664.7816782783	374966.82773426437	405872.98527478677	426711.1146943269	360828.26895606006	371844.8427531289	342327.8938405759	453345.08226066397	397478.207696076	553408.1632977774	297271.50116804603	302802.7845126538	376220.5437123303	309369.4345541444	413111.3120562155	515183.5441642145	564041.6591036002
B3KWA8											1241104.3485499902	535422.3120279764	485467.6733483911	541437.5663186989	1329392.7583009189	518260.5112558789	4818455.847432246	521332.8185549039	1857290.6124526868	763840.2746912766	897704.523354782	834871.6511170998	1287590.5510860404	1603366.0115625968	1566230.1729708388	1208968.9058245304	1079517.0780220237	1196402.331376994	1424614.5455428318	1512741.6766044013	1128353.385557017	1784656.435667936	1654761.032357515	1339041.922835283	1277196.051135476	1021295.0798146962	863944.9679993298	1129507.7882912287	1065563.9151005505	1347689.905057225	849309.2028004164	1325913.4436352386	1585338.5570545853	1300467.8128248893	1124264.6180365877	1177851.957877997	1317825.2089731048	1438101.4919102888	1183600.6205304228
B4DDX3	177201.87588292247	891604.2743836882	523383.1706699229	746001.0968078956	793750.2409164475	1408418.54002919	1033719.1368775469	270842.7495758793	813592.8643695269	1179050.4976937084	1448515.6398559888	967063.8910800584	714211.4752504869	765427.7192439333	529841.4658685393	792602.6052156524	802648.9498931597	824308.4032231703	396751.2179384839	596227.7961874525	979704.070108792	944552.5189192964	712725.6436831873	920053.644177234	599173.1311450242	904701.928440355	871763.0316735596	739939.0119953665	625633.7407360786	539340.2182507691	938127.9013373556	833650.3123946402	758228.9420335004	843417.1085565144	615118.2482727049	768267.0380887601	884844.6022764641	666855.1379412996	848788.8464455452	680284.4826638767	767770.826294273	942464.961933934	516071.1501320203	899362.5727569296	584182.0633474139	714128.9129792872	1005595.4930783452	663434.1064861214	693468.7041741259
B4DE15											12442.72312476236	131278.65988041594	465803.5181820011	124994.51191416512	173422.65658309017	272454.4397392305	313821.8677624644	181163.5592707024	244192.2966289621	143114.4477677718	118364.13972847695	169670.59400774632	330583.37516540475	195612.5402523289	320398.00674085197	235642.90948835327	258184.38627466004	205696.32232514073	120342.40026237957	108218.87117961142											143643.61835327747	184262.47195780685	94332.96974436467	264016.15175958205	226442.1130079276	208531.43740278078	334750.527060194	179810.3897359561	240527.58003740376
B4DGM3	21283272.35891774	26740824.13763425	27090728.42304761	26645316.764444504	28226770.021807253	29579997.86791139	27635120.450229194	26734622.3601544	30658983.11385638	29414794.91940304	16668035.292897427	23187959.603472866	19099884.01436176	22660693.43416053	26107744.98206605	32656813.871391	30861915.21775866	25192667.88584494	44128966.200128816	33445754.48431451	19462405.928427685	22751635.286008626	29456080.25519727	29810570.98956668	28607525.779546466	31237180.04251673	26347184.163184047	29490664.71708697	27919542.01981211	28927641.288020603	19111306.846381187	26092694.24786425	28384764.85514363	28197216.437702026	32168219.301951304	23832540.12937649	35156830.06876593	27311841.646438804	26487277.22918587	27267742.87090634	20047113.883678734	26792216.56795526	28634975.326544315	25966670.606804546	27321685.7386384	29036512.47406607	28197974.78422719	30323490.51099477	30376113.612949185
B4DHE8	9192486.31134905	15033255.292824753	14233868.63870008	12840579.57976948	22898032.624813017	23035865.8446808	14520119.933383755	16668408.287319673	14529094.049535414	16964070.89868547	8112341.261137296	13419428.372523848	20237358.143079054	17180876.81693039	18352806.36001654	17235122.401267968	16137608.99232748	13559865.06005044	22286147.08301113	13394236.062868433	9751955.456792066	13131445.519848607	13746658.426144134	16013635.249462733	17812137.16483891	21596135.799936414	16606549.907391066	17945026.963058908	10759963.298328064	22552279.044795547	8364678.719764843	16794443.70559822	13964238.21309317	16937106.897882044	23527814.606529	13610400.318742707	20004365.53198429	12954813.183968665	14831829.487098295	18926097.218211196	10059884.447116466	16144800.49442598	14632016.729966693	13812714.870247856	13702401.586787868	17847001.19578721	17499965.812945113	17549822.706181478	19191582.720277574
B4DHQ6																					415516.1225470073	380977.6029735387	276520.0493458686	260131.8173428941	103504.03621613256	370343.93219107104	291726.14280354517	396423.4698154031	363401.6563000525	455764.5943392735
B4DIB3	1425688.2933180109	1452835.2208738662	1699055.955418934	1346240.8165199298	1342538.9627623132	1346240.8165199298	1264325.4372167713	1359592.8018679149	2007259.010572302	1609926.707254779	1316929.4315970684	1810478.8943354704	1471560.394276827	1658279.1147475068	1288816.4652101942	1888139.758035216	1357622.8057287892	1732121.4773848215	850721.1310894148	1479046.8945912453	812246.3507935962	1057249.8108480435	1512038.752233287	1616373.2828612789	735071.2758037861	2240858.07561812	2026708.4067221447	1902481.3002156643	1649155.4359671557	1301542.8217639737	1262336.582072801	1412334.4557536088	1643718.6721039724	1406120.018429964	1286181.378083625	1632429.1109660182	1426316.9397318088	1714770.4055043082	1514769.0976383488	1554748.644420462	1215469.4648186571	1299516.8684409796	1351597.796841772	1677167.319895339	1562980.0967784303	1514395.3024782785	1580482.0074645043	1483665.0058998663	1514552.4798315272
B4DJL6	15053767.78545402	8211634.738628584	8716531.436626395	7459460.367701473	8138350.88173282	7476440.397456579	7147991.386801091	9618755.603588507	7908477.173011105	7688756.110710537	8289165.54181728	8103436.071361211	8532194.529754477	8091087.037421312	9463311.688822802	8805305.764369266	8375500.107897897	7843612.397265753	10851980.31381866	9064576.201744216	9094864.292009594	7894227.391593347	9022681.601181263	9385421.133171674	8460436.564615007	8838835.797425032	8298440.556080955	8815932.448135534	9212098.489899803	8397230.129679838	8579630.17420806	8090762.358013867	9761491.309741106	8707487.910751158	9602492.066552827	8709029.724633	9044248.8932118	8626925.001656797	8335823.019721469	7962277.867860268	6584183.677969599	8037598.079513375	9240035.536260445	9412320.610268746	8756849.249667868	10052888.68774662	9499477.506857183	8517694.470756888	9232427.839378284
B4DJV2	69527323.067322	46969867.09840714	47832663.80136564	53287802.79476988	46160201.11611275	51051692.46421079	49919777.110931896	50573515.97823378	48481782.60600108	43496734.98890755	48394829.29196433	38787480.40573403	42627625.1515564	48760677.51019314	55824069.27232994	45372942.41778793	61074332.791639596	44488327.24862875	57584703.63314946	64386375.14923886	51665398.38985833	64780400.53937772	44027109.42050342	45994113.88581245	44180524.26268436	41674748.50706232	48453776.6802174	52148428.95417893	48624145.82931629	65752716.27312321	61234009.17906752	50968057.04818293	44242781.3294927	47590629.53027155	50093570.25830529	55201114.54129995	57715404.7247117	47546340.93315194	46531159.47830483	46178297.51577286	57926106.86049962	47522053.27664559	51230153.03929218	53967948.48617981	53066566.55714873	53037583.21537924	45919245.493451096	45478727.68189665	42625800.74038667
B4DL54	3660823.940679285	3228129.4488895317	4377991.165203157	2847331.336956182	4532814.854517973	4750862.365514402	4592553.898626584	4452396.9105256125	4154697.340717703	4778529.201788498	3865056.3340148362	4312084.607270478	4544848.16305336	4479238.679987739	3344481.348199825	4427290.811647864	5238554.599682922	4342622.532730277	2246239.319969	4575713.292618935	3844810.737765772	4942796.416256079	5184866.2534531085	4810617.78035073	4537868.090323869	3782831.3947559483	4449448.8059746735	3884595.5137244826	3437270.4140867237	2501024.9115825025	5322968.032984027	5337420.379194878	4512979.720348533	4803809.726240943	2520902.103350086	4106343.251961372	2238142.888198802	4179918.8326711664	4130086.392164915	4223557.410515622	5773527.496297168	5528905.695747895	3382198.3948165844	3083658.4116859282	3393857.8377792723	3364844.0527934907	6250367.434669447	3890220.0627033236	3167140.4547305205
B4DLN1	34544218.49640909	22408355.758024953	25503931.75661324	22308410.13754864	21945593.844038736	26292543.77571401	26564998.275368616	25069496.89588257	26311711.428956047	23952720.962097306	29674047.3365396	22952636.89743661	23465840.37844169	20181338.10000914	28394957.642427284	24444037.316478666	25392686.17530625	22388113.06833101	29625837.31256639	28382485.242676795	30702394.64660893	21753839.420033406	19240573.766398046	22300310.97063918	24330236.639113396	29488931.223576605	26778797.354956586	26645060.70541656	24440372.70344048	29221457.924496546	29589334.515445594	22974668.759032	23132505.57327216	25266922.67593277	28847255.32100836	24417471.0064872	29596574.7362823	24389407.91052413	25224929.39507988	21462910.648328014	34661712.818202466	22752055.01992576	31325007.52110381	22791470.893494394	23637396.180082787	22561039.632631604	26260067.76753425	24825936.36769085	22476143.90494532
B4DP31	1200259.990169242	319986.46584082657	619000.5861558189	242289.34955007426	424181.507917183	1000774.1130609028	526139.1984773135	620921.544528336	736337.243451219	542795.0375425505																					100163.95791810725	7878.128027273573	4735637.877284134	33633.371531803416	269442.4462938554	8598.583062927766	996690.148661338	19322.121628994773	46720.34850605249	14597.97553291738
B4DR61	38812259.40580284	12189196.833804775	22329473.957494084	13634458.84900636	16219297.655610325	21596059.161945313	22071624.21045106	25108908.561921004	26272589.46368884	18229290.235535327	30887454.63452337	18412622.88784713	14183900.416200684	25660753.21310028	26914156.5545814	17135305.599537358	13773414.867982645	18873043.10100084	20438471.825723466	30184033.00414373	34686471.99071421	25238692.346712984	17045935.91598828	24182234.86910347	14197998.62432233	22191092.27111668	28798613.96129543	13796740.057421587	22632022.62643129	13693356.423179673	45877110.05722882	25836587.12871591	24273616.999183603	18784319.90538831	17754506.392185204	20136113.086643524	13743447.936329555	17746685.023730498	17830810.359267917	14479960.132481147	36405224.98308623	28101694.41189827	24457716.73665409	16850157.51962723	17494301.21975505	14376004.035419784	23517908.61018408	24866809.6858234	20496603.178396802
B4DR80	273529.99883505626	234830.92694369965	239277.12461926648	234388.25861425427	259921.28569085195	276642.02908614604	265292.87586022465	244751.42205765212	248531.04955732546	246107.15800862183	276679.9224001662	302474.1807769627	264136.7452992712	237170.02063262023	234227.79390524986	217917.2392729925	215742.6461353947	223277.40119811925	308668.3423082689	242965.98606548534	356989.58824559115	370152.823909433	202999.50879516613	371713.0738796045	252870.37192625532	200742.6401763405	148003.99364937257	261023.2274041941	142222.27861906073	216542.91804328913	321694.0301758243	163346.08942170074	269158.5444556304	249825.0463129139	199349.23724144688	311780.11990661884	182473.6198995445	259024.93534389397	282313.0126521661	284304.0334126021	246507.46415927107	252701.28299577173	284567.6380281629	242635.64764339005	261434.62193468303	246300.82226656954	206598.38914515512	223276.56506398512	238296.16789665827
[truncated: 9,425 more rows]
[truncated: 197 more columns]
