# Supplementary material for: Population-scale proteome variation in human induced pluripotent stem cells
Source: eLife. 2020 Aug 10;9:e57390. doi: 10.7554/eLife.57390 (PMC7447446; doi:10.7554/eLife.57390)
Supplement: Figure 1—source data 4. — Variance decomposition for 6009 genes high RNA expression (TPM >1) and detected in lines at the protein level. [file elife-57390-fig1-data4.xls]

ensembl_gene_id	Gender_protein	Age_protein	batch_protein	feederfree_protein	Donor_protein	channel_protein	residual_protein	variance_protein	mean_protein	cv_protein	overdispersion_protein	overdispersion_rank_protein	mean_rank_protein	protein_id	uniprot_id	gene_symbol	Donor_transcript	Age_transcript	feederfree_transcript	Gender_transcript	residual_transcript	variance_transcript	mean_transcript	cv_transcript	overdispersion_transcript	overdispersion_rank_transcript	mean_rank_transcript	gene_id	transcript_protein_correlation	gradient	intercept	protein_nlines	in_corum	pqtl	eqtl	eqtl_rep	Donor_protein_sign
ENSG00000000003	0.0564059753355	0.00044472970872000005	0.000444729623977	0.043168982746099996	0.00044472966918500005	0.12698500498	0.772105847937	5268938208350.0	7884447.742860001	0.291132221052	2.1425752683400003	0.9406601650409999	0.7391793563869999	O43657	O43657	TSPAN6	0.17342185399799998	0.00143856750555	0.00143856779171	0.030225528904499997	0.7934754818	57.2371183546	35.979407140300005	0.21027366167300002			0.976396354288	ENSG00000000003	0.28035445713	0.492363095207	20.2667391297	202.0	False	False	False	False	False
ENSG00000000419	0.0037338172739699994	0.0037338172777499996	0.00373381846411	0.0609149974151	0.133932945675	0.00373381860513	0.790216785289	1425768888800.0	10838596.3927	0.11016699985999999	-0.40395792513800005	0.35671417854500004	0.782386917711	Q5QPK2	Q5QPK2	DPM1	0.437906367475	0.0645849468013	0.00262397618495	0.00262397621985	0.492260733319	39.3455252369	45.743065693	0.137126820403			0.982238840851	ENSG00000000419	0.0730642932495	0.067936828157	22.979197644499997	202.0	False	False	False	False	False
ENSG00000000457	0.00306758174226	0.033117800797599996	0.00306758189724	0.019865310289099998	0.00306758960571	0.00306758853351	0.9347465471349999	50777249936.0	1859269.53275	0.121197101995	-1.7530248493599998	0.0258814703676	0.502587952892	Q8IZE3	Q8IZE3	SCYL3	0.00778939913053	0.0287674442699	0.0077893993724	0.059019488902000004	0.8966342683249999	0.0392788783071	1.5435002987900002	0.128402305194			0.763281919452	ENSG00000000457	0.136461769939	0.21420158501699998	20.5246387997	202.0	False	False	False	False	False
ENSG00000001036	0.09006582140769999	0.00169520925529	0.00169520926118	0.0016952098049799998	0.517532345853	0.00169520919764	0.38562099522	1347065283030.0	7348305.58396	0.157945447751	0.33480173405499997	0.633383345836	0.728902557948	Q9BTY2	Q9BTY2	FUCA2	0.24229422867699998	0.158011409933	0.0737704341046	0.0027559352265399996	0.523167992059	11.6848806381	25.6324701859	0.133358800112			0.964068707642	ENSG00000001036	0.184691252956	0.239907668385	21.6382216933	202.0	False	True	False	False	True
ENSG00000001084	0.0022384717763	0.0445955481791	0.0022384717875999997	0.098794902854	0.189016630328	0.00223847175323	0.660877503322	4750038090990.0	16613827.5772	0.131183389276	0.289841371927	0.6180795198800001	0.836921461256	P48506	P48506	GCLC	0.12133591611700001	0.19129374709199998	0.0027049671615799998	0.00270496718637	0.6819604024439999	1.034492481	6.630332155780001	0.153401068153			0.871562670406	ENSG00000001084	0.225017546017	0.295782375258	23.090320758	202.0	False	False	True	False	False
ENSG00000001497	0.00404407835725	0.00404407834162	0.00404407834125	0.00404407921309	0.124862584704	0.0566638813783	0.802297219665	6119563168440.0	23836161.358000003	0.10378244413200001	-0.26104110739	0.414028507127	0.879753956942	Q9Y4W2	Q9Y4W2	LAS1L	0.455155281577	0.00412379939442	0.277585058072	0.0585958077757	0.20454005318100002	2.1330383616299997	16.4016486387	0.089045469678			0.941302485004	ENSG00000001497	0.12418385231699999	0.126337936071	23.9702124911	202.0	True	False	False	False	False
ENSG00000001629	0.014630204663499999	0.00178875392009	0.0017846197090399998	0.0382691206915	0.207339777646	0.0464655139229	0.689722009447	74697519282.6	1397628.75834	0.195551549344	-0.644279256258	0.266091522881	0.441752306654	Q9P2G1	Q9P2G1	ANKIB1	0.329703612182	0.07102558368689998	0.00672549591685	0.006725495654760001	0.58581981256	1.05925320652	11.6465523584	0.08836952288960001			0.9170951156810001	ENSG00000001629	-0.046568127186500004	-0.0820995723921	20.66191599	202.0	False	False	False	False	True
ENSG00000002549	0.0013819118663099999	0.00138191190944	0.0013819118744800001	0.0013819120870999999	0.231159043444	0.00138191181966	0.761931396999	70015501852900.0	39571495.3683	0.21145338454100002	1.9350123998599997	0.925506376594	0.924911859575	P28838	P28838	LAP3	0.363311504838	0.445586732405	0.00152604458472	0.0015260445624699999	0.188049673611	4.67720717926	14.776184580899999	0.14636289674			0.9344862506820001	ENSG00000002549	-0.041575241847900006	-0.0676367779922	25.4507355908	202.0	False	False	True	True	True
ENSG00000002822	0.0030342109690200004	0.00303421098736	0.00303421101094	0.185704315856	0.00303421097317	0.0030342109836	0.7991246292199999	4100956368740.0	16669812.9617	0.121481975979	0.0694052095111	0.540435108777	0.837296526892	Q9Y6D9	Q9Y6D9	MAD1L1	0.170727664988	0.00339771894399	0.420304596211	0.07562319863099999	0.329946821226	0.199095525994	3.71405019992	0.12013871458799999			0.823849030147	ENSG00000002822	0.12453322742100001	0.15063192162699998	23.6603294916	202.0	True	False	False	False	False
ENSG00000002834	0.0018227079296300002	0.0329505049003	0.0018227079317000002	0.00182270795583	0.18703359542999998	0.0018227079296199997	0.772725067923	63565248837600.0	59522791.393999994	0.133945024478	0.7916335046940001	0.7591897974490001	0.9501912834749999	Q14847	Q14847	LASP1	0.319215447494	0.00409430744771	0.00409429083395	0.00409429156869	0.6685016626560001	24.363457148800002	42.1676320312	0.11705507395999999			0.9804666199269999	ENSG00000002834	0.19264390738499998	0.282471670973	24.2701665529	202.0	False	False	False	False	False
ENSG00000003056	0.00259958976444	0.06495025683780001	0.00259958976282	0.117847769484	0.116580311743	0.00259958983193	0.6928228925759999	3384376111380.0	13777638.0491	0.133525600321	0.276167587035	0.612903225806	0.813367339284	P20645	P20645	M6PR	0.224309494764	0.529985259375	0.0020669339053900003	0.0020669338986700004	0.241571378057	7.4361771025	21.550879255199998	0.126534766677			0.955967126276	ENSG00000003056	0.258596349626	0.37084264931999994	22.0500324645	202.0	False	True	False	False	False
ENSG00000003147	0.131974451488	0.0026756826536100003	0.00267568277199	0.143201970109	0.25066057288000004	0.035204053593599995	0.433607586504	99429366865.6	2810768.09417	0.112184361863	-1.4830382758200003	0.053938484621199996	0.578576250844	E9PDL4	E9PDL4	ICA1	0.397987213814	0.00280152561484	0.0028015256121199997	0.0028015256116	0.593608209347	0.9284086892360001	6.42515154926	0.149963726035			0.868680377035	ENSG00000003147	0.278181632935	0.259334020788	20.6566446751	202.0	False	False	True	True	True
ENSG00000003393	0.0043576394108	0.00435763941644	0.00435763942079	0.00435763969071	0.00435763957084	0.00435763946368	0.973854163027	796687528848.0	8316302.247880001	0.10732817494300001	-0.696374578155	0.246736684171	0.746455629735	Q96Q42	Q96Q42	ALS2	0.353265933898	0.216375713787	0.0033153230550399997	0.00331532032541	0.423727708935	0.876306643257	7.602258244910001	0.123136111164			0.8826439199189999	ENSG00000003393	-0.0291135892526	-0.029819478589999997	23.068368280999998	202.0	False	False	True	False	False
ENSG00000003509	0.023603658097900004	0.00252985480531	0.0025298547462300003	0.020661585386000002	0.16110119688	0.00252985475648	0.7870439953280001	4730867431940.0	15634498.5839	0.13911899502800001	0.438741953754	0.666316579145	0.82874503038	Q7L592	Q7L592	NDUFAF7	0.20979970141399998	0.0807801461318	0.00154735832421	0.00154735798954	0.7063254361399999	6.3820251177	13.0677967104	0.193320043779			0.925683570928	ENSG00000003509	0.526228331874	0.42955143186000005	22.2559745423	202.0	False	True	True	True	False
ENSG00000003756	0.101459855887	0.011697617357100001	0.0037723952704099995	0.0037724001642300002	0.0037724000393	0.00377239529825	0.871752935983	595700148724.0	6995503.13292	0.110330325345	-0.729244707286	0.23375843960999998	0.7216262845999999	P52756	P52756	RBM5	0.22213896612599998	0.034449920852	0.0018326652675699998	0.0018326652305600002	0.7397457825239999	1.6638014882700003	7.43367833487	0.173518981382			0.880657474488	ENSG00000003756	0.23857169272	0.200617791255	22.10367779	202.0	False	False	False	False	False
ENSG00000003989	0.00108682626728	0.0144106045136	0.00108682626514	0.00108682626634	0.00108682626502	0.0053063245401099995	0.975935765882	97623191510.0	1599633.64876	0.195324161992	-0.501204171935	0.319054763691	0.472507688846	P52569-3	P52569	SLC7A2	0.301620451575	0.24347827769299998	0.123267583645	0.06301235200040001	0.268621335087	3.66041735667	7.942312317150001	0.240889761744			0.886227311677	ENSG00000003989	0.19486232236200002	0.20266881579100002	19.930111946700002	202.0	False	False	False	False	False
ENSG00000004059	0.09523569103690001	0.00173109609698	0.00173109591663	0.00173109580333	0.0017310961944500003	0.0122184938837	0.8856214310680001	3137066545680.0	11685082.4393	0.151575875346	0.56544928593	0.7020255063770001	0.79296376866	P84085	P84085	ARF5	0.427672114635	0.03958678217830001	0.0393808906353	0.004597216953640001	0.488762995598	29.7232945002	52.5832763318	0.10368139452			0.984887434759	ENSG00000004059	0.128936352221	0.177974736301	22.423961008400003	202.0	False	False	True	False	False
ENSG00000004399	0.0010763336363299998	0.0032829882989599997	0.00107633359264	0.299332375025	0.00107633358002	0.033727024458	0.660428611409	161818787361.0	2123816.69268	0.18940761749200002	-0.355333812895	0.37659414853699996	0.527267271773	Q9Y4D7	Q9Y4D7	PLXND1	0.408648790776	0.185570345561	0.00138908509002	0.00138908503838	0.403002693535	3.0927630549400003	8.738500476619999	0.20125024147300002			0.894737867103	ENSG00000004399	0.286847824603	0.315775741291	19.8983160704	202.0	True	False	True	False	False
ENSG00000004455	0.005167340554140001	0.00516734669941	0.00516733435283	0.00516733804183	0.00516733750591	0.0638918091611	0.9102714936849999	20370957275400.0	46806646.8648	0.0964268963877	-0.247763109059	0.41927981995499997	0.936613907434	F8W1A4	F8W1A4	AK2	0.09353958541190001	0.00298809155746	0.447022502344	0.00298808987931	0.45346173080700003	4.25411978534	18.8199600377	0.109593844055			0.949131416998	ENSG00000004455	0.25375056552700004	0.265877937254	24.3277625231	202.0	False	False	False	False	False
ENSG00000004478	0.00166872894578	0.00166872896033	0.0016687289664300002	0.0016687289528699999	0.11837081907	0.0523098053121	0.822644459793	1505244646810000.0	244266850.41799998	0.158832368837	0.980898890029	0.798499624906	0.9920486085060001	Q02790	Q02790	FKBP4	0.171569717863	0.0286094947842	0.241897476521	0.000990835818608	0.556932475013	277.352920862	83.45222926539999	0.19956226728100002			0.991567344395	ENSG00000004478	0.37982140153000005	0.326997296987	25.740713599	202.0	False	False	False	False	False
ENSG00000004487	0.0056557967592299994	0.0056557966606800006	0.00565579709899	0.0056557966357	0.005655797182510001	0.005655796737619999	0.966065218925	24865214104800.0	56719003.8601	0.0879159162668	-0.43463622317100004	0.345311327832	0.947190758383	O60341	O60341	KDM1A	0.421805743685	0.320750991958	0.0046383400090100006	0.00463834453742	0.24816657980999998	50.223073411099996	81.5100534365	0.0869441698412			0.991255745112	ENSG00000004487	0.0721915287938	0.0789982789657	25.247789556999997	202.0	True	False	False	False	False
ENSG00000004534	0.137823788396	0.0395405699954	0.0036239602105400002	0.00362396035562	0.00362396038276	0.0036239603071700002	0.808139800352	3917265171960.0	17513012.6283	0.113013577986	-0.11925803827999999	0.47021755438900004	0.843597629585	P78332	P78332	RBM6	0.394411755004	0.096763748762	0.00266514658017	0.00275180644273	0.503407543212	4.55428718648	14.036787196099999	0.15203461920199998			0.931311832983	ENSG00000004534	0.0139912638052	0.0139103193207	24.0065403454	202.0	False	False	True	False	False
ENSG00000004700	0.004814193491510001	0.00481422342187	0.004814238154260001	0.20336705672299998	0.23274035544500002	0.00481419351664	0.544635739247	10548431532500.0	37678236.1049	0.08619922891739999	-0.675613413375	0.255888972243	0.921311229465	P46063	P46063	RECQL	0.484565545321	0.00611360212772	0.00611360213006	0.006113602132069999	0.49709364828900005	2.5370332524	17.2937193978	0.09210318989060001			0.944379527927	ENSG00000004700	0.254144819871	0.273308167264	24.012672795100002	202.0	False	False	True	False	True
ENSG00000004766	0.0047652606286099995	0.00476526017124	0.00476526086088	0.004765260150159999	0.004765260815010001	0.00476526016751	0.971408437207	257883367000.0	4946388.618430001	0.102665241182	-1.18302971889	0.104726181545	0.671067436801	Q96JG6	Q96JG6	CCDC132	0.44362635181800003	0.005880427402270001	0.00588042739547	0.00588042757095	0.538732365813	0.08204862182099999	2.19029237219	0.130777657679			0.786203941731	ENSG00000004766	0.11326276813200001	0.182491011425	21.9047845223	202.0	True	False	False	False	False
ENSG00000004779	0.00139557460422	0.00139557467162	0.00139557487599	0.00139557462349	0.149982680511	0.0013955753609400001	0.843039445353	6197097876160.0	14529482.0116	0.17133419408300002	1.01481301231	0.8051762940739999	0.820343560123	O14561	O14561	NDUFAB1	0.0017134054381900002	0.0017134144209699999	0.241759988441	0.0649679316602	0.689845260039	64.965212994	47.171204808999995	0.170869073488			0.982920464283	ENSG00000004779	0.207731301452	0.205659835236	22.5964470548	202.0	True	False	False	False	False
ENSG00000004864	0.00411627535411	0.010761195144200002	0.00411627362217	0.00411627399674	0.04835449041809999	0.0292099256665	0.8993255657979999	42071266468700.0	61550287.4493	0.105381095104	0.105934737705	0.553863465866	0.951916585402	Q9UJS0	Q9UJS0	SLC25A13	0.239101533684	0.19455925643199998	0.0024080194956799996	0.0024080194833499997	0.561523170906	16.7992672486	31.604711089499997	0.129686074563			0.9723845135160001	ENSG00000004864	0.17948454641199998	0.169726066902	25.0143963002	202.0	False	False	False	False	False
ENSG00000004897	0.027684658671	0.0101624598945	0.0101624635238	0.0101624613004	0.198978945989	0.0685531761985	0.6742958344230001	1167004055060.0	16007275.320999999	0.0674867894291	-1.6407799952700002	0.03488372093019999	0.832120621109	G5EA36	G5EA36	CDC27	0.482143932716	0.0036924845537699997	0.00369248727005	0.0366239836297	0.47384711183	3.32176674889	15.3160229355	0.11899769762199999			0.936940095038	ENSG00000004897	0.10391581622300002	0.0866386909904	23.5567067417	202.0	True	False	False	False	False
ENSG00000004961	0.00244919293733	0.0220302096478	0.00244919293265	0.00244919298227	0.0031744732075300003	0.00244919292597	0.9649985453659999	6256732409260.0	15941430.3747	0.15690851201300002	0.7923485600560001	0.759339834959	0.831370489836	P53701	P53701	HCCS	0.161093763571	0.0337435487903	0.136515100007	0.0161186546392	0.652528932992	14.5796802497	11.8469732059	0.322304666507			0.918127288307	ENSG00000004961	0.399000417733	0.291200519466	22.8504433736	202.0	False	False	False	False	False
ENSG00000004975	0.0023479584362800002	0.0023479583895	0.00234795850091	0.327545743426	0.00234795923866	0.00234795840402	0.660714463604	562546273131.0	6367137.59641	0.11779717914999999	-0.5952797537569999	0.28319579895	0.7071487510310001	O14641	O14641	DVL2	0.020955914989400002	0.16727083124000003	0.14369575992900002	0.00451238545665	0.663565108385	1.1879298799200002	10.951791180499999	0.099519972807			0.9127132507600001	ENSG00000004975	0.14582120265999998	0.1822544897	21.9228764228	202.0	True	False	False	False	False
ENSG00000005007	0.0162915450591	0.0162915450729	0.016291545021299998	0.0634713709081	0.126181905434	0.025061650622	0.736410437883	18744836048900.0	81494377.8001	0.05312674092400001	-1.8723799637599998	0.0189797449362	0.964593803916	Q92900-2	Q92900	UPF1	0.431110475756	0.19923641972800002	0.00190235887695	0.00190235889009	0.36584838674900005	8.039425580589999	17.9521971675	0.15794100613			0.94656072291	ENSG00000005007	0.17321446531399998	0.0591092711108	26.025889703	202.0	True	False	False	False	False
ENSG00000005022	0.021836319512900004	0.0019681169162699998	0.00196811691632	0.00196811692536	0.0103159895238	0.010269288239600001	0.9516740519660001	29971118388600.0	34514872.8716	0.158615343658	1.0513774253200001	0.811702925731	0.9133598379719999	P05141	P05141	SLC25A5	0.159318644761	0.09711064013810002	0.00166861921548	0.0890744892054	0.6528276066800001	2391.30160326	272.604610102	0.179384114639			0.9983251538519999	ENSG00000005022	0.323194779817	0.325452168067	22.404743723400003	202.0	True	False	False	False	False
ENSG00000005075	0.0118083391991	0.00248405652705	0.0024840564683	0.00248405656837	0.00248405646969	0.00248405652125	0.9757713782459999	2546483362830.0	12526871.0861	0.127387792977	0.09949533679639999	0.5512378094520001	0.801590278299	P52435	P52435	POLR2J	0.207076638616	0.169759594934	0.367620200573	0.000983469593155	0.254560096284	66.282260007	39.905628919	0.20401612489			0.979083898107	ENSG00000005075	0.021754621142099997	0.0198315759595	23.4451590788	202.0	True	False	False	False	False
ENSG00000005100	0.0140521502723	0.0008163370673380001	0.000816337067332	0.000816337067466	0.000816337068293	0.000816337067349	0.98186616439	10400678583700.0	9513541.68104	0.338991346825	2.73829171495	0.969017254314	0.765433950941	Q9H6R0	Q9H6R0	DHX33	0.22116328105900002	0.0461747080092	0.412075667266	0.00214407564573	0.31844226802	6.1913516128	19.8692109367	0.12523107654100002			0.952286359741	ENSG00000005100	0.10940156211799999	0.178936230772	22.359473228899997	202.0	False	False	True	False	False
ENSG00000005156	0.005423802195939999	0.018429929781599998	0.00542380220978	0.0641079712097	0.07319371326639999	0.0508602182416	0.782560563095	24225708881900.0	53550531.6263	0.09191247489260002	-0.326213434019	0.38874718679700004	0.944115220164	P49916	P49916	LIG3	0.463118662843	0.326258829333	0.0010683704183400001	0.0010683708182400002	0.208485766587	6.052987813069999	13.6622087872	0.180079377937			0.9292280127760001	ENSG00000005156	0.22278736540199998	0.123705227984	25.1876985755	202.0	True	False	True	True	False
ENSG00000005175	0.00836938805213	0.00836938780823	0.00836938858586	0.038164003499599995	0.0819888923913	0.008369388207620001	0.846369551455	5467172328880.0	31108554.5629	0.0751625575337	-1.13281191581	0.116129032258	0.90480834146	Q9H6T3	Q9H6T3	RPAP3	0.33946962493	0.09266747476810001	0.004817043223479999	0.071032397189	0.49201345988899997	3.39907710607	18.265799159700002	0.100935009939			0.947398145984	ENSG00000005175	0.352555011471	0.277678317081	23.6972181963	202.0	False	False	False	False	False
ENSG00000005194	0.00308441225429	0.0030844122544299996	0.0030844122548699996	0.107455255616	0.00308441225667	0.06839139952750001	0.811815695836	11665936705900.0	32593168.6248	0.10479322945399999	-0.16155085096400001	0.45213803450900003	0.90840897157	Q6FI81	Q6FI81	CIAPIN1	0.22015337621199998	0.213568882722	0.393138465185	0.0016773261631	0.171461949718	6.426420471779999	19.782401838	0.128146146007			0.9520331853239999	ENSG00000005194	0.0590112515392	0.0574959292395	24.6919231079	202.0	False	False	True	False	False
ENSG00000005249	0.0032885892138399997	0.0372396686449	0.00328858923128	0.0032885893143499998	0.150610342218	0.00328858920506	0.798995632173	2335080641180.0	11808166.7976	0.129410186319	0.115550707859	0.557614403601	0.794539044333	P31323	P31323	PRKAR2B	0.394680983935	0.0506638314652	0.0020439358470499998	0.00472579058555	0.547885458167	6.94304565001	14.8033030541	0.17799851545899997			0.934544675547	ENSG00000005249	0.545011972976	0.41256716894	21.8779127085	202.0	True	False	False	False	False
ENSG00000005302	0.0009132952227789998	0.000913295234624	0.000913295221573	0.180172305714	0.00091329522197	0.0009132952216369999	0.815261218163	20424225595.7	671213.7628319999	0.212917788445	-0.822085403909	0.20315078769699998	0.266971720051	Q8N5Y2	Q8N5Y2	MSL3	0.354398914164	0.00199657556224	0.00883795419935	0.136143702928	0.498622853147	0.45626960689900004	2.70927729107	0.249320112066			0.8008296330920001	ENSG00000005302	0.18536268342700002	0.24796859528	18.8424994582	202.0	True	False	False	False	False
ENSG00000005339	0.0049574302984	0.0049574302519	0.00495743028317	0.004957439838770001	0.00495743169112	0.00505022570414	0.970162611932	517275246069.0	7367883.21616	0.0976153497078	-1.0520754336700002	0.136234058515	0.729427649839	Q92793	Q92793	CREBBP	0.388933579705	0.26870792829	0.00142576087542	0.00142576087474	0.339506970255	2.3713019913299997	8.3772156585	0.183820412852			0.890940250837	ENSG00000005339	0.228188212205	0.153791647532	22.303185876700002	202.0	True	False	False	False	False
ENSG00000005436	0.000663278677492	0.013236685400100002	0.112661508314	0.493513661843	0.0817892592284	0.000663278666811	0.29747232786999994	236173543954.0	2609611.8059900003	0.186225742621	-0.132495076964	0.464891222806	0.566124071713	P16383	P16383	GCFC2	0.258647784309	0.00271725483277	0.00271725473361	0.0345922257853	0.70132548034	0.458335848221	4.10011475754	0.165118563207			0.831580587365	ENSG00000005436	0.22304968755399998	0.34628632419100003	20.518845226099998	202.0	False	True	True	True	False
ENSG00000005448	0.0943918081967	0.0007528000588110001	0.00075280007654	0.12069535683	0.0728761917304	0.0007528000598860001	0.7097782430480001	469685456868.0	2909708.1356900004	0.235534282317	0.701397350836	0.735933983496	0.584202235391	Q9H977	Q9H977	WDR54	0.09764715675180001	0.18031683656599998	0.0010208143021200001	0.028330813720400003	0.69268437866	8.7560559663	12.4862155208	0.236986407507			0.9221001791700001	ENSG00000005448	0.285892857156	0.310827411185	20.2776912615	202.0	False	False	False	False	False
ENSG00000005700	0.0218865099879	0.14615435171399999	0.0017834528733599998	0.00178345536708	0.015601398390799999	0.0779844482478	0.7348063834190001	561451668742.0	4885382.55149	0.153376072122	-0.0371163691256	0.49924981245300004	0.669267121746	Q9P2D0	Q9P2D0	IBTK	0.384983116087	0.09648946552750001	0.0034453163141599996	0.0914725830503	0.42360951902099997	0.9213932471349999	7.646139457289999	0.125539471983			0.88320869362	ENSG00000005700	0.33565302588699997	0.489106253693	20.6578850246	202.0	False	False	False	False	False
ENSG00000005810	0.004459743266279999	0.0506475262865	0.00445974327375	0.00445974326627	0.00445974327211	0.18716297789	0.744350522745	1992762995390.0	13729589.4171	0.10281826594599999	-0.47923278266400005	0.328357089272	0.8128422473929999	O75592	O75592	MYCBP2	0.361644072341	0.13443282177000002	0.00124015218643	0.00124015218645	0.5014428015169999	0.9791845670649999	4.47817570436	0.22096889837499997			0.838922645478	ENSG00000005810	0.050033503254500004	0.036589969850199994	23.6176542504	202.0	False	False	False	False	False
ENSG00000005882	0.045569396880900004	0.0312519703003	0.043450494208800004	0.105027216833	0.0655457882022	0.010880635533300001	0.6982744980419999	143460023055.0	2308399.51989	0.16407955625499998	-0.67122864974	0.257389347337	0.5421948841049999	Q15119	Q15119	PDK2	0.36145206027500004	0.184563045711	0.0022810291076300004	0.0377521756113	0.413951689295	0.37758544913900005	3.6689564185300005	0.16748081739499998			0.822933707252	ENSG00000005882	0.251415618585	0.410444876848	20.199616526	202.0	False	False	True	False	False
ENSG00000005884	0.0008847674003839999	0.000884767257043	0.000884767485728	0.027995416048499998	0.0008847724289319999	0.0033411694049099994	0.965124339975	704778459585.0	3375275.51613	0.248723649791	1.0200646511	0.806001500375	0.609931738054	P26006-1	P26006	ITGA3	0.359035836623	0.0422857354164	0.130028332179	0.034187822952400006	0.43446227283	0.844346950695	4.03946631766	0.227476469075			0.830509464828	ENSG00000005884	0.422432464286	0.513219267928	20.452780356199998	202.0	True	False	True	False	False
ENSG00000005893	0.25938915708099997	0.09978277428610001	0.000597077214056	0.0355172981105	0.345377749648	0.0005970772771290001	0.25873886638300003	648691756600.0	3306409.10047	0.243591764839	0.9394727409110001	0.7900225056260001	0.6068561998349999	P13473-2	P13473	LAMP2	0.291107732692	0.0021696099785	0.0021696100472900002	0.0328295534845	0.671723493797	5.03865419961	14.5281293825	0.15450679295199998			0.933765677339	ENSG00000005893	0.20575563189100002	0.335702368582	20.293325181300002	202.0	False	False	False	False	True
ENSG00000006007	0.00188549698803	0.0807594158181	0.00188549760331	0.00188549709006	0.00188549701533	0.0592645456892	0.852434049796	107259898262.0	2042183.9603799998	0.160370258593	-0.8758043985799999	0.18769692423099998	0.520291050934	Q9NZC3	Q9NZC3	GDE1	0.47792541041599995	0.00309274441445	0.00309274442209	0.00309274454388	0.512796356203	5.563459322640001	18.1148087535	0.130208310909			0.9469696969700001	ENSG00000006007	0.102686977537	0.128031278253	20.3804546058	202.0	False	False	True	False	False
ENSG00000006114	0.046055628578900006	0.006587665261649999	0.00658766589873	0.0065876660735399994	0.348269322199	0.00658766639921	0.579324385589	410311585662.0	7574687.113530001	0.08456529959039999	-1.44995006076	0.058064516129	0.733328332458	Q9UMZ2-5	Q9UMZ2	SYNRG	0.327424798446	0.10923825869100001	0.0542388744051	0.0669859678937	0.442112100564	0.41952899882100003	5.17869652834	0.125072125594			0.850627093558	ENSG00000006114	0.0735993913013	0.0827954647387	22.6137580948	202.0	False	False	True	True	True
ENSG00000006125	0.050871489521000006	0.0125075345542	0.012507537277600001	0.10569165208100001	0.20163334070099997	0.012508068531400001	0.604280377335	9458867056180.0	52472263.2336	0.058612435006599996	-1.6326793432799998	0.035933983495900004	0.943065036381	P63010	P63010	AP2B1	0.482098727434	0.321615576545	0.000799911913452	0.0007999116665250001	0.194685872441	88.63236569629998	51.9612092198	0.18118278098700002			0.984731635117	ENSG00000006125	-0.123729928992	-0.05397306571769999	25.9475254567	202.0	True	False	True	False	True
ENSG00000006451	0.004902930796520001	0.00326237670667	0.0227408793798	0.00326237672506	0.0032623776424	0.012545945686700002	0.950023113063	10989153285200.0	29582309.0776	0.11205985220999999	0.00837551510163	0.515753938485	0.900532593204	P11233	P11233	RALA	0.35593767865099996	0.00504431320591	0.00504431346751	0.005044313131180001	0.628929381544	11.4097540681	34.0791502759	0.09911728197030001			0.974760458051	ENSG00000006451	0.24466803717500002	0.27436856854499997	23.4124911845	202.0	False	False	False	False	False
ENSG00000006453	0.00148676748139	0.0410320784647	0.0014867674589700002	0.0014867678525799998	0.0014867674525499998	0.0014867675333099998	0.951534083757	5996215291090.0	11975461.157	0.20447789344700001	1.44269610291	0.8740435108779999	0.795964293751	Q9UHR4	Q9UHR4	BAIAP2L1	0.480352370182	0.00415051281215	0.00415051332152	0.0041505132776700005	0.5071960904070001	2.22614669738	13.255564413599998	0.112558595529			0.9269104931059999	ENSG00000006453	0.336553469613	0.401858510044	21.948262976	202.0	False	False	True	True	False
ENSG00000006530	0.0030484736276699996	0.00304847382341	0.0030484753499999996	0.0030484796777800003	0.025068897311	0.0064496900667100005	0.9562875101430001	15457902595800.0	29836900.4248	0.131771526877	0.47774156790399996	0.6758439609899999	0.901282724477	Q53H12	Q53H12	AGK	0.166880622651	0.129780631345	0.13136795951	0.00498067046517	0.566990116029	0.501082204817	6.83166180434	0.103616312136			0.873802290255	ENSG00000006530	0.275217672624	0.321204884851	23.847811849099998	202.0	False	False	False	False	False
ENSG00000006625	0.0326972093315	0.00167405484124	0.00167405484134	0.00167405486049	0.12374940301100001	0.0174211622113	0.821110060903	16568336370300.0	28025115.7417	0.145241938486	0.7452350170290001	0.748012003001	0.895656739929	O75223	O75223	GGCT	0.335665203292	0.206071581461	0.00238142526071	0.0375620993308	0.41831969065499996	32.522821187699996	39.436528445	0.14460903506699999			0.9788696736	ENSG00000006625	0.21134927469099998	0.28559218566100003	23.1732011002	202.0	False	False	False	False	False
ENSG00000006634	0.00170199646958	0.00170199680024	0.0017019964836600002	0.0017019964972799998	0.0826738531747	0.0017019964736099999	0.908816164101	77039192426.8	1647017.82009	0.168522371763	-0.904864885955	0.17839459864999999	0.479258870302	Q9UBU7	Q9UBU7	DBF4	0.386228756917	0.026748219460400003	0.0706392059409	0.0027409014813000003	0.5136429162	5.98363277704	18.0809922665	0.135288289481			0.9469112721040001	ENSG00000006634	0.162989611364	0.19255531512899998	19.8259953743	202.0	True	False	False	False	False
ENSG00000006712	0.001343350538	0.00134335088763	0.0013433505233	0.0013433508228900002	0.00134335053668	0.037647979476300004	0.9556352672149999	39354325802100.0	22657350.1693	0.276877153608	2.5590740958700002	0.962115528882	0.875028129923	Q8N7H5-3	Q8N7H5	PAF1	0.24479254167800002	0.00963775081947	0.121998070406	0.00265568059001	0.620915956507	3.0362189554400003	11.8945658838	0.146493362447			0.918341512815	ENSG00000006712	0.0263375899456	0.0312468691536	24.286045632600004	202.0	True	False	False	False	False
ENSG00000006715	0.087619932402	0.108288959351	0.00404897233657	0.0426547659463	0.16442856564799999	0.00404897429561	0.58890983002	717963990781.0	8295280.34072	0.10214574111300001	-0.841261048643	0.196924231058	0.7460805640989999	P49754	P49754	VPS41	0.297961801769	0.110138539871	0.00279656638108	0.018208915059	0.57089417692	0.962495058394	6.973549570710001	0.14068421183399998			0.875301861806	ENSG00000006715	0.34446983476599996	0.324593399176	22.0147449386	202.0	True	False	False	False	False
ENSG00000006744	0.00635093608002	0.00635093613429	0.00635093607845	0.265831935539	0.00635093608353	0.00635093617121	0.7024133839129999	8020077384120.0	37778852.5454	0.07496188802739999	-1.07756636482	0.129407351838	0.9214612557200001	Q9BQ52	Q9BQ52	ELAC2	0.45616035208000005	0.08984235612680001	0.0505975330567	0.010967099880600002	0.392432658856	5.688021804500001	19.4547757863	0.122589816874			0.951098387474	ENSG00000006744	0.310788354692	0.24389498691599998	24.0998493693	202.0	False	False	True	False	False
ENSG00000006757	0.38531075361	0.0008682405231980001	0.0008682409721779999	0.0012216114851700001	0.218306416647	0.0008682405002160001	0.392556496263	332439039465.0	2733673.50133	0.210915922308	0.29818718451	0.6217554388600001	0.573475358188	P41247	P41247	PNPLA4	0.18698395247699998	0.000550593004434	0.0005505942550980001	0.5677715244789999	0.24414333578400002	3.1918312241500004	5.5826194848399995	0.320023545505			0.856138505881	ENSG00000006757	0.647544484985	0.600082798001	19.729736480899998	202.0	False	False	False	False	True
ENSG00000007062	0.144914677525	0.00119714899989	0.00119714963252	0.100876599433	0.21772289559900002	0.014032851871200002	0.520058676939	2121321281410.0	7962618.870289999	0.18291414681600002	0.808286468953	0.7633158289569999	0.7408296451880001	O43490-2	O43490	PROM1	0.472862366792	0.140539853309	0.0008311682026030001	0.038312643264300006	0.347453968432	10.0519785544	13.2338995549	0.23957303938000002			0.926793643375	ENSG00000007062	0.48838190253700003	0.43330403120300004	21.2491694004	202.0	False	False	False	False	True
ENSG00000007080	0.003955293714409999	0.0199368697708	0.0309218402924	0.237496667537	0.00533566241461	0.00395529334245	0.6983983729279999	6727145351080.0	26907309.0692	0.09639292045289999	-0.446768631889	0.341110277569	0.8912309654189999	Q96CT7	Q96CT7	CCDC124	0.403985565131	0.11712838626599999	0.0017250164234399999	0.0017250164288900001	0.475436015751	43.1525056456	35.2127532594	0.186553338506			0.9758121056319999	ENSG00000007080	0.30942653412	0.234458049884	23.444155294	202.0	False	False	True	False	False
ENSG00000007168	0.00294471634229	0.0029447163434299997	0.00294471633972	0.00294471633937	0.0029447163612500004	0.00294471635652	0.9823317019169999	21719212727100.0	43234921.4071	0.107792207407	0.0344117520085	0.527756939235	0.931813067287	P43034	P43034	PAFAH1B1	0.245317406591	0.49558741492499997	0.0015468969524900001	0.0015468969516600002	0.25600138458	8.78525941697	20.9184664508	0.14169269223099998			0.9547791540080001	ENSG00000007168	0.170443902281	0.16217346770500002	24.6409048629	202.0	False	False	False	False	False
ENSG00000007202	0.029659689470099997	0.00114898995309	0.00114898996298	0.05178317608519999	0.00114899078023	0.00114899002195	0.913961173726	346652959806.0	2623341.73614	0.224436034984	0.414182038764	0.658964741185	0.566949216113	Q14667	Q14667	KIAA0100	0.490117347424	0.235895855901	0.0008315685718500001	0.0008315685709380001	0.272323659533	22.5554144927	22.870104595500003	0.207662106605			0.958985744333	ENSG00000007202	0.0319384941572	0.0333772838526	21.1289576523	202.0	False	False	False	False	False
ENSG00000007255	0.152898024604	0.09135418140809999	0.0006681275147259999	0.0006681274437819999	0.10239546439899999	0.0006681274209330001	0.65134794721	27770446260.2	724501.472967	0.230012880416	-0.544348189645	0.301875468867	0.286025054385	O75865	O75865	TRAPPC6A	0.024965454688599998	0.0580131978414	0.127439276281	0.029107339226900005	0.760474731962	19.166513391	22.7004363575	0.19285786425299997			0.958615720184	ENSG00000007255	0.214767894442	0.30410575743900004	18.0388072628	202.0	True	False	False	False	False
ENSG00000007392	0.0143604290632	0.00505014917362	0.00505014899341	0.00505014967716	0.0050501489923699995	0.005050148963449999	0.960388825137	4391705333270.0	21705153.7604	0.09655032271019999	-0.491972211546	0.32265566391600004	0.869477158503	Q9NQ29	Q9NQ29	LUC7L	0.18508883040100002	0.24805694290199998	0.179279732176	0.000869031053842	0.386705463468	8.965052665610001	12.423823976700001	0.241002269883			0.921710680065	ENSG00000007392	0.07808987881639999	0.046197640663800006	24.189019726199998	202.0	False	False	False	False	False
ENSG00000007402	0.020608074721099996	0.00474069044137	0.0292680151535	0.00110420999729	0.0155511903107	0.00110420985397	0.927623609522	1631851286820.0	6358813.75524	0.20089271313499998	0.944209547981	0.790697674419	0.7069237116500001	Q9NY47-4	Q9NY47	CACNA2D2	0.175790027107	0.118835357602	0.17209457780600002	0.00939188757528	0.52388814991	15.2781061559	12.5122440308	0.312391749735			0.922236503856	ENSG00000007402	0.599244420482	0.482653644208	20.7959384736	202.0	False	False	False	False	False
ENSG00000007520	0.0290588409969	0.00159208381454	0.26281445243900003	0.0015920827888199999	0.00159208285531	0.0015920837133	0.7017583733920001	109406415468.0	2113831.50581	0.156477186232	-0.911503250282	0.175918979745	0.525917035481	Q9UJK0	Q9UJK0	TSR3	0.110183149706	0.00133002737402	0.594938926123	0.00133002739309	0.292217869403	19.6942931178	29.1217554085	0.152388659499			0.969326945548	ENSG00000007520	0.07913037970169999	0.118755756337	20.3765529426	202.0	False	False	False	False	False
ENSG00000007866	0.00273954082641	0.0027945624810799996	0.00273954084147	0.0486371530233	0.24277287399	0.00273954181659	0.6975767870209999	216940041829.0	3687652.21784	0.126304814031	-0.859749119131	0.192048012003	0.623434100968	Q99594	Q99594	TEAD3	0.34685892103	0.00204393112066	0.09821661193610001	0.0193599580453	0.533520577868	8.63154530333	18.8123438218	0.156171351856			0.949053517177	ENSG00000007866	0.165656377493	0.15685127893200002	21.1296783172	202.0	False	False	True	False	True
ENSG00000007923	0.00464073288764	0.00464073275625	0.0046407329977099995	0.100777901243	0.00464073275992	0.012690801461700001	0.867968365894	3225027134000.0	18239554.6655	0.0984583279172	-0.499823736016	0.319729932483	0.848548495987	Q9NVH1-3	Q9NVH1	DNAJC11	0.03759285366680001	0.0194314421313	0.33888843619099995	0.00321659765311	0.600870670358	4.7488830995699995	19.289016793	0.112975858001			0.9506309885490001	ENSG00000007923	0.159846933048	0.139043314508	23.5038356334	202.0	True	False	False	False	False
ENSG00000008018	0.033790440596799996	0.006504732844560001	0.00650473296068	0.006504732975090001	0.00650473328539	0.0722752514384	0.867915375899	17390349667200.0	46826694.3951	0.0890554815209	-0.47702739543300005	0.329482370593	0.936688920561	P20618	P20618	PSMB1	0.262200912141	0.00192374576566	0.38847655920100005	0.00192374578898	0.345475037104	100.58738370399999	75.14627209560001	0.133464054893			0.990145672665	ENSG00000008018	0.00306579941825	0.00249768866071	25.4530716384	202.0	True	False	False	False	False
ENSG00000008056	0.175886700268	0.000779640663324	0.0007796413681989998	0.000793001072592	0.000779643485486	0.000779641566325	0.820201731576	591790485719.0	3552890.16575	0.21652208847399998	0.6661809027310001	0.7275318829709999	0.617583077038	P17600	P17600	SYN1	0.220816662835	0.0008226300946269999	0.0008226300998310001	0.104868816817	0.6726692601530001	1.36729426609	4.51167224426	0.259175206945			0.8395263690889999	ENSG00000008056	0.6309407237770001	0.7185967616399999	19.997053823199998	202.0	True	False	False	False	False
ENSG00000008083	0.00185332499742	0.00673886702215	0.00185332500159	0.00185332501183	0.19112003986200002	0.00185332499385	0.7947277931110001	13183319717800.0	23391970.5333	0.15521925123	0.89626946729	0.781545386347	0.87787862876	Q92833	Q92833	JARID2	0.466321209793	0.0013702915910699998	0.0013702916116099999	0.0163115152309	0.514626691774	212.45944663	74.2058782144	0.19642633511500002			0.9899314481579999	ENSG00000008083	0.4376970632	0.379285007014	22.1205485611	202.0	False	False	False	False	False
ENSG00000008130	0.0011660061953299998	0.103565679014	0.00116600615876	0.00116600785415	0.020264634263400003	0.0011660061794900002	0.871505660334	407451774595.0	3323698.8407	0.192050941786	0.2587430144	0.606976744186	0.607756357363	O95544	O95544	NADK	0.330673636755	0.007399341543810001	0.00467997117168	0.0250744853164	0.632172565213	2.0151355666599997	13.0122550902	0.109093673413			0.92543039651	ENSG00000008130	0.36786588702	0.8868690964329999	18.2677169291	202.0	False	False	False	False	False
ENSG00000008282	0.0293348486908	0.000480296953991	0.00048029695475	0.431897678133	0.04235471466469999	0.012063674850299999	0.483388489752	375396730865.0	2524389.03675	0.242710719521	0.581086092598	0.705176294074	0.559072837747	Q16563-2	Q16563	SYPL1	0.209187213946	0.00304972374328	0.00304972380978	0.0222506385072	0.762462699993	18.6125835241	34.3894295916	0.125452221876			0.975072057334	ENSG00000008282	0.0704639091102	0.136262801174	20.5316445235	202.0	False	False	False	False	False
ENSG00000008294	0.17140103289099998	0.00276267615966	0.00276267603106	0.08277690018089999	0.05547624532269999	0.0792731486746	0.60554732074	12156911880500.0	29463036.7649	0.11834069804300001	0.164863933194	0.575318829707	0.9000825144399999	O60271	O60271	SPAG9	0.262888511899	0.25943811960200003	0.242834855653	0.0370185372746	0.197819975571	2.65843914325	9.73281564736	0.167523162931			0.903384747215	ENSG00000008294	0.355160092718	0.272991259759	23.8701667676	202.0	True	False	True	False	False
ENSG00000008311	0.156695710451	0.00049999247775	0.000499992464457	0.000499992817056	0.153153348496	0.000499992455872	0.688150970838	2835320153300000.0	215004661.478	0.24765846484200002	2.31350651814	0.951162790698	0.990023254069	Q9UDR5	Q9UDR5	AASS	0.407447426246	0.0285702249377	0.000306151328487	0.124822895835	0.43885330165200004	1441.66446453	117.571298415	0.322946648933			0.99483913687	ENSG00000008311	0.690745505132	0.566487959585	23.8071696039	202.0	False	False	False	False	False
ENSG00000008394	0.0009618489838500001	0.022975582326400002	0.000961846959346	0.000961846898072	0.166136523894	0.031769121675200004	0.7762332292630001	17263581517600.0	16920276.2258	0.245560212901	2.1056473957599997	0.9384096024009999	0.838946815693	P10620	P10620	MGST1	0.227481846598	0.34015081054799995	0.00174472741745	0.007566963119140001	0.42305565231700004	43.2247019262	36.4122483735	0.180558736534			0.9767858533930001	ENSG00000008394	0.264012129105	0.388802410626	21.940591148400003	202.0	False	False	False	False	False
ENSG00000008869	0.00304281240221	0.0030427601011599995	0.0621575018711	0.180298427741	0.0610230081724	0.00910751053949	0.681327979173	307551070745.0	5000424.1659699995	0.11090516603	-0.9496329162270001	0.163390847712	0.6724926862199999	Q9P2D3	Q9P2D3	HEATR5B	0.293919339536	0.129996582442	0.0393016862466	0.0026762242054	0.53410616757	0.38377074322800003	4.155855238430001	0.149064943669			0.832612759991	ENSG00000008869	0.0491325302214	0.0528675195539	22.0959526443	202.0	False	False	True	False	False
ENSG00000008952	0.0140219562577	0.0017522766933900002	0.0017522767228900001	0.0017522767174399999	0.117758252233	0.0551351590916	0.8078278022840001	3649622516780.0	12208379.9639	0.156482557774	0.6807706542440001	0.7311327831960001	0.7988898057160001	Q99442	Q99442	SEC62	0.27882838821600003	0.0695271270418	0.47447935409599995	0.0011812595877300001	0.17598387105799998	6.27348409112	14.7233875483	0.17011658534899998			0.9342915011299999	ENSG00000008952	0.00870094845556	0.009088484834680001	23.4970760758	202.0	True	False	False	False	False
ENSG00000008988	0.00204660725135	0.00204660978541	0.00204660837774	0.104579695842	0.0549527391775	0.00204660755398	0.8322811320129999	109067206976000.0	69434880.2433	0.150407469657	1.1409766994700001	0.828732183046	0.957992648714	P60866	P60866	RPS20	0.296881400509	0.16899209769999998	0.00202719293718	0.035598725094699996	0.496500583759	1818.29310902	253.769633539	0.168032115022			0.998227779076	ENSG00000008988	0.0192071437909	0.019895184962099997	25.8565055133	202.0	True	False	False	False	False
ENSG00000009307	0.00608263807214	0.00608263804348	0.0060826380512499995	0.00608263803617	0.353956222893	0.0262659897946	0.595447235109	100150179938000.0	111741626.94299999	0.0895593383915	-0.42908919702200005	0.34816204051	0.97584577301	O75534	O75534	CSDE1	0.34963849272299996	0.26386578297200003	0.250726934662	0.0020532468626300003	0.13371554278	378.242900459	173.43426891599998	0.112137399024			0.996884007167	ENSG00000009307	0.103422475601	0.08251279432469999	26.1083624385	202.0	True	False	False	False	True
ENSG00000009335	0.00696512541728	0.00696512573246	0.00696512546111	0.101899027434	0.00696512708136	0.0316205124801	0.838619956394	297483895382.0	6901561.57538	0.07902861352400001	-1.69976634403	0.030232558139499998	0.719900982672	Q15386	Q15386	UBE3C	0.520793703096	0.267909363723	0.00209805186754	0.00209805186721	0.207100829446	2.79345068149	12.0640511381	0.138540686293			0.9193736854410001	ENSG00000009335	0.192774688007	0.188589873967	22.0059785625	202.0	False	False	False	False	False
ENSG00000009780	0.0014399440235299999	0.0014399356078599998	0.00143993560044	0.0014399356998100001	0.0014399992473599999	0.00143993562786	0.9913603141930001	225110380356.0	2420863.47248	0.19598708942600002	-0.0959717370991	0.47771942985699994	0.551796564399	Q8TAV0	Q8TAV0	FAM76A	0.054325033806400004	0.022269392524399998	0.492857135141	0.00268809637182	0.42786034215700003	0.263739012495	4.1764927608499995	0.122963284419			0.83302173405	ENSG00000009780	-0.024087516354200002	-0.0550837715428	21.2976949956	202.0	False	False	False	False	False
ENSG00000009954	0.0051441186741	0.00514411876557	0.00514411886517	0.005144123052229999	0.0231627215148	0.0051441187217	0.9511166804060001	39314431363600.0	65169114.3003	0.09621309395469999	-0.149979454581	0.45663915978999997	0.954992123622	Q9UIG0-2	Q9UIG0	BAZ1B	0.38638017164099997	0.0243549477922	0.00400417789745	0.0040041778991	0.58125652477	6.67435508275	23.3366800642	0.110704578232			0.9599010672280001	ENSG00000009954	0.16895717889000003	0.138484102663	25.3182494317	202.0	True	False	False	False	False
ENSG00000010017	0.009421873574100001	0.00942187323689	0.00942187391009	0.010988296266100001	0.106235558705	0.0697914707879	0.7847190535199999	194629037502.0	6423868.3244199995	0.0686763471423	-2.14706751183	0.009227306826709998	0.7084239741949999	Q96S59	Q96S59	RANBP9	0.43271426138	0.00776291955585	0.166208059174	0.0412549094754	0.35205985041500004	2.5354318463900003	21.0410395346	0.07567610622189999			0.95501285347	ENSG00000010017	0.0922602187861	0.100493261677	22.173554633400002	202.0	True	False	False	False	False
ENSG00000010165	0.00253975415238	0.00253975416594	0.0025397541769099996	0.53194063278	0.00253975496813	0.0260752507824	0.431825098974	3456445678520.0	18074530.0359	0.102860315984	-0.37734616399000004	0.368867216804	0.8471982596950001	Q8N6R0	Q8N6R0	METTL13	0.219593749089	0.369417575972	0.130736788906	0.0014438160080699999	0.278808070024	4.73525681825	13.568784788	0.160372838046			0.928838513671	ENSG00000010165	0.122301326775	0.0835278756137	23.761888151500003	202.0	False	False	True	False	False
ENSG00000010244	0.0387548660483	0.00587720321321	0.005877203202609999	0.005877203252880001	0.00602340795855	0.0254603074211	0.9121298089030001	4104744973820.0	23997247.5453	0.08442705848960001	-0.8552563035140001	0.19302325581399998	0.8802790488339999	O43670	O43670	ZNF207	0.08472987811619999	0.008150618982279999	0.0081506190788	0.00815061895537	0.890818264867	2.23096374628	18.892053164500002	0.0790618727656			0.949345641505	ENSG00000010244	0.22109495574299998	0.255436409648	23.398965701199998	202.0	True	False	False	False	False
ENSG00000010256	0.0424934640456	0.0044763997066599994	0.00447639966033	0.0680098019591	0.040470806121400006	0.004476399927499999	0.8355967285789999	38646307035800.0	61886759.4388	0.10045146097	-0.03157027395	0.50127531883	0.952291651039	P31930	P31930	UQCRC1	0.33718215760700004	0.124029934573	0.15074553505000002	0.00377460051391	0.38426777225599995	29.0030513465	53.5153169859	0.10063377016899999			0.985296408818	ENSG00000010256	0.050596369321099996	0.04249531021269999	25.6329780914	202.0	False	False	False	False	False
ENSG00000010278	0.00024424435192700004	0.036919589841900004	0.00684976399709	0.169357214349	0.116788159214	0.000244244349298	0.6695967838970001	8924106670180.0	6955704.37974	0.429478334595	3.18889579742	0.982595648912	0.7208011402	A6NNI4	A6NNI4	CD9	0.085640470836	0.0361838956709	0.000557010083269	0.000557017100126	0.87706160631	211.02509584400002	39.53865714	0.36740506395499994			0.9789475734209999	ENSG00000010278	0.621891093111	0.875213059401	18.0304896578	202.0	False	False	False	False	False
ENSG00000010292	0.010415882039399998	0.010415882038999999	0.0104158820396	0.010415882039799998	0.0104158821099	0.0104158820386	0.937504707694	19208858740800.0	66043106.3769	0.0663625841481	-1.22076353211	0.0963240810203	0.9555172155130001	Q15021	Q15021	NCAPD2	0.330824852865	0.265699655755	0.00136896489092	0.00136895572361	0.400737570765	89.0672085467	55.6513905721	0.169583228895			0.9859585572949999	ENSG00000010292	0.0446186183875	0.023154719463	25.8297887843	202.0	True	False	False	False	False
ENSG00000010322	0.013105139540899998	0.0962511717873	0.08794108374330001	0.291975114634	0.022446031121799995	0.0168777593127	0.47140369986	985740546317.0	7192203.54753	0.138044573857	-0.0662687278745	0.487321830458	0.72605205911	Q9Y2I1	Q9Y2I1	NISCH	0.156715592371	0.17089733851	0.0012319285361300002	0.0012319262985699998	0.669923214284	5.384034392259999	11.819891099100001	0.196309102471			0.91795201371	ENSG00000010322	0.13294222225500002	0.09089777136369999	22.4303917219	202.0	False	True	False	False	False
ENSG00000011009	0.00176315634906	0.00176315629151	0.00176315633949	0.0017631669285699998	0.07589342352339999	0.016542391984	0.9005115485840001	26191312037900.0	36810436.5812	0.139029723493	0.6941480738429999	0.733683420855	0.9193608881550001	O95372	O95372	LYPLA2	0.091514248478	0.000906058080738	0.727845807162	0.0009060580804650001	0.178827828198	37.4461425787	40.9373238421	0.14948034611400002			0.9796681467630001	ENSG00000011009	0.0206952502318	0.0182592536394	25.019925252199997	202.0	False	False	True	True	False
ENSG00000011021	0.075055734237	0.144892789036	0.00103876249177	0.0010387629291	0.0010387624302200002	0.00103876301754	0.775896425859	243468746149.0	1918299.56467	0.25722026501	0.44058954539899997	0.666916729182	0.508213937439	P51797	P51797	CLCN6	0.37793304960699997	0.0364896997968	0.00242313785281	0.149058665122	0.434095447622	0.657543780133	4.96251944705	0.16340303372099999			0.847296876217	ENSG00000011021	0.25562871500900003	0.368996945008	19.8914993405	202.0	False	False	True	True	False
ENSG00000011028	0.038887390436699996	0.000634756795862	0.000634756783194	0.00328352329545	0.19945290574400001	0.0408159499426	0.7162907170020001	2796267576940.0	5572634.65775	0.300074293247	2.0143327975400003	0.931732933233	0.687795364189	Q9UBG0	Q9UBG0	MRC2	0.23354702814	0.09125085711349999	0.000493681612395	0.05652985007680001	0.618178583057	7.917401391989999	8.091263966160001	0.347756264313			0.887668458363	ENSG00000011028	0.680614763141	0.671222533565	20.2927223242	202.0	False	False	True	False	False
ENSG00000011132	0.000929773848719	0.0113783936356	0.0009297738527	0.171711086426	0.0009297738611700001	0.03858842689269999	0.775532771483	30513162226.7	822996.766097	0.212248915722	-0.720187134455	0.237659414854	0.316180331558	O96018	O96018	APBA3	0.457352256214	0.110291909202	0.138584270364	0.006746990718659999	0.28702457350099997	0.14942971200400001	3.1217642372900003	0.123827863185			0.811034509621	ENSG00000011132	-0.046868202754	-0.114717282132	19.806829096199998	202.0	False	False	False	False	False
ENSG00000011198	0.00047328244073900004	0.000473282418459	0.09824072710519999	0.401484875921	0.000473282416045	0.000473282383137	0.498381267315	44014250354.7	682309.070613	0.307479035338	0.250837674999	0.603225806452	0.27049733703400003	Q8WTS1	Q8WTS1	ABHD5	0.229750575053	0.00232099942808	0.315302163175	0.025869793366700002	0.426756468977	0.33988559232	3.4436008965699996	0.16929867745000002			0.818240243047	ENSG00000011198	-0.0308890980699	-0.08993601897739999	19.4911169929	202.0	False	False	False	False	False
ENSG00000011243	0.00296810192894	0.0029681021858600004	0.00296810582558	0.260054980494	0.00296810924595	0.00296810245604	0.725104497863	1610543453470.0	11617830.4807	0.10923484283500001	-0.382940867361	0.36609152288099994	0.792138624259	Q9ULX6	Q9ULX6	AKAP8L	0.207180228465	0.073475131732	0.0028140100150300003	0.00281401001499	0.713716619773	8.34041593786	21.175058031400003	0.13638582828			0.955324452754	ENSG00000011243	0.149185007035	0.133639946691	22.8532968518	202.0	True	False	False	False	False
ENSG00000011258	0.00180092024393	0.00180092019885	0.0018009201990000002	0.37270561181100004	0.113178911164	0.0018009201996500002	0.506911796183	338695939485.0	4350304.30006	0.133778203175	-0.554241532953	0.29872468117	0.6505138399220001	Q05BQ5	Q05BQ5	MBTD1	0.21891357778	0.14825930183299998	0.00337442067621	0.0033744203186	0.626078279392	6.37947767279	21.2080276073	0.11909465779000002			0.955382877619	ENSG00000011258	0.0901001889732	0.10797429505999999	21.541548411100003	202.0	False	False	False	False	False
ENSG00000011260	0.008689857171690001	0.017304188491799998	0.00382862245203	0.0038286241883600004	0.0038286224123499995	0.00382862251566	0.9586914627680001	6308667377580.0	22421734.3898	0.112021042861	-0.0542949149918	0.492948237059	0.873227814868	Q9Y5J1	Q9Y5J1	UTP18	0.08815465506310001	0.09911105889	0.010524666395799999	0.010524666409200002	0.7916849532420001	6.60239199391	36.2247775439	0.0709324442815			0.976669003661	ENSG00000011260	0.12185707485500001	0.15516000629	23.5863117468	202.0	False	False	False	False	False
ENSG00000011295	0.0714787183275	0.00252076847795	0.0025207683997199998	0.0025207694117800002	0.399548810007	0.00252076839454	0.518889396982	2538497857840.0	12505094.7348	0.127409383554	0.09915519394120001	0.551012753188	0.801440252044	Q6DKK2	Q6DKK2	TTC19	0.399256836268	0.22387355843000004	0.00267200986683	0.186823202271	0.18737439316399998	3.59872546995	15.3522832325	0.123566681873			0.9370958946789999	ENSG00000011295	0.345109705624	0.425117517933	21.8526955768	202.0	False	False	False	False	True
ENSG00000011304	0.0848168452268	0.00724570059018	0.007245700552939999	0.007245700572189999	0.00724570073869	0.00724570056687	0.878954651752	396468607198000.0	244428191.228	0.0814616323909	-0.9459956999439999	0.16496624156	0.9921236216339999	P26599	P26599	PTBP1	0.17581474164500002	0.009740026777790001	0.00455514751137	0.0194097439944	0.790480340071	90.207192605	90.1907591453	0.10530731531700001			0.992385292514	ENSG00000011304	0.126155046217	0.117920829883	27.0953195731	202.0	True	False	False	False	False
ENSG00000011376	0.00224138692035	0.00224138693004	0.0022413868980100003	0.445521188051	0.226257538596	0.008817826235040002	0.31267928637	9853162217900.0	25669385.0354	0.122284764662	0.22884291909499999	0.596699174794	0.886955217163	Q15031	Q15031	LARS2	0.519790747825	0.168038670274	0.125521678358	0.00118309716386	0.18546580637899998	7.4542694350600005	14.1566952296	0.19285933309099998			0.9320129313700001	ENSG00000011376	0.39393484483499996	0.26461459965399997	23.5488193423	202.0	False	True	True	True	True
ENSG00000011405	0.011853330887899999	0.0118533308856	0.011853330883899999	0.0118533311097	0.271259930505	0.011853330891400001	0.669473414837	9976831502600.0	50993586.4645	0.0619413634892	-1.48550022201	0.053413353338299996	0.9411146950720001	O00443	O00443	PIK3C2A	0.176422688623	0.11292604438100001	0.201748545672	0.00186141476536	0.507041306558	8.94630527298	21.218248872100002	0.140965331734			0.955402352575	ENSG00000011405	0.117760371583	0.058934027072	25.342624086199997	202.0	True	False	False	False	True
ENSG00000011426	0.00378276174777	0.003782761739	0.00378276173875	0.152684720132	0.0037827617415799996	0.00378276173865	0.828401471162	16218420073900.0	36694144.1482	0.109750753287	0.0106474209431	0.517179294824	0.918610756882	Q9NQW6	Q9NQW6	ANLN	0.09418926893210001	0.0019522826433599999	0.11103862611700001	0.0019522681122299999	0.7908675541949999	20.9076416973	29.0482504655	0.157410081517			0.969171145906	ENSG00000011426	0.399295952583	0.34293785353399997	23.426709489	202.0	False	False	False	False	False
ENSG00000011451	0.0168574642855	0.0067381509947899995	0.00673815075252	0.006738150786560001	0.00673815074837	0.0067381508243100005	0.9494517816079999	2483325840560.0	18144392.7234	0.08685091865419999	-0.863857122701	0.19032258064500002	0.8477233515870001	M0QXA7	M0QXA7	WIZ	0.40144148073799996	0.0330217349927	0.00797299365698	0.0160730778992	0.541490712713	0.641641422379	9.06534117863	0.0883612890309			0.897581210563	ENSG00000011451	0.227747300451	0.210975093358	23.4035942397	202.0	False	False	False	False	False
ENSG00000011454	0.0842265172765	0.00444821130108	0.00444821102017	0.0044482111724300005	0.004448211458479999	0.0202369611136	0.877743676658	6463230749220.0	26639448.4586	0.0954332253001	-0.47793649945600003	0.32903225806499997	0.890180781637	Q9Y3P9	Q9Y3P9	RABGAP1	0.255972067209	0.0123885687657	0.0024998146047399998	0.00249981460483	0.726639734815	1.4345315928100002	8.26403171128	0.14493159895500002			0.889654903794	ENSG00000011454	0.160669794787	0.156946366292	24.148340973499998	202.0	False	False	False	False	False
ENSG00000011485	0.0035356322394899994	0.00450710244966	0.00353563226806	0.00353563236662	0.0182931845607	0.0035356333009	0.963057182815	12506223445100.0	34200938.5362	0.10340107832699999	-0.18609338697299999	0.441185296324	0.912309654189	P53041	P53041	PPP5C	0.23865531395999998	0.213325298113	0.315944428229	0.0030874065364699995	0.22898755316199998	2.35428854389	15.0892783577	0.101686049294			0.9359468723219999	ENSG00000011485	0.00959087309322	0.011539690743200002	24.969231259	202.0	False	False	False	False	False
ENSG00000011566	0.00117868259209	0.0180554704027	0.0011786825843699998	0.206573733996	0.00117868264858	0.0316505260539	0.7401842217219999	3578892314180.0	8173149.392289999	0.23146475909400002	1.5071101191999998	0.882595648912	0.7446553146799999	Q8IVH8	Q8IVH8	MAP4K3	0.48083247531499995	0.0012670395245	0.00126703953694	0.0180588624043	0.498574583219	9.22543293055	14.008503497000001	0.216821145759			0.931175508296	ENSG00000011566	0.318489332683	0.308697685313	21.731315986	202.0	False	False	False	False	False
ENSG00000012048	0.0036094433624899998	0.0036094486862899996	0.00360944328962	0.00360945418342	0.00360945009296	0.0685098663084	0.913442894077	407380344194.0	5544551.6708	0.115115445954	-0.7539410160050001	0.22640660164999998	0.68749531168	P38398-4	P38398	BRCA1	0.205730216714	0.297528717859	0.12736465106699998	0.00211218960457	0.36726422475599996	1.15426316583	7.2735866735300005	0.147707925988			0.8789047285189999	ENSG00000012048	0.225729181171	0.227286687635	21.688497639899996	202.0	True	False	True	False	False
ENSG00000012061	0.0017557003264000001	0.119436321323	0.00175570031781	0.0017557003904900002	0.194701483155	0.00175570056733	0.67883939392	127249207037.0	1838204.07225	0.194059013119	-0.403606848508	0.357014253563	0.499737454054	P07992	P07992	ERCC1	0.464892054679	0.00332534795321	0.0033253879411300003	0.0033253512177099996	0.525131858209	1.1643784235899999	8.25546283088	0.13070904699400002			0.8895770039730001	ENSG00000012061	0.34744382662600004	0.50706437448	19.1438271443	202.0	True	False	True	False	False
ENSG00000012232	0.0030255113270999997	0.00302551130656	0.00302551130781	0.00302551130175	0.0030255113031	0.0030255113045500005	0.981846932149	322502034059.0	4405351.562059999	0.128909717526	-0.647875327162	0.264516129032	0.6532143125050001	O43909	O43909	EXTL3	0.378962826571	0.40218506653499997	0.00107512824673	0.00107512817625	0.216701850471	5.943801054140001	13.9547200359	0.174707280842			0.9307665342370001	ENSG00000012232	0.1711982286	0.136098434133	21.5236089365	202.0	False	False	False	False	False
ENSG00000012822	0.00216395204921	0.00216395224985	0.0021639519717299997	0.00216395188204	0.00216395310078	0.00216395320969	0.987016285537	28352763708.5	1085832.34997	0.155072548016	-1.46389292092	0.056639159789899994	0.385642487435	Q9P1Z2-2	Q9P1Z2	CALCOCO1	0.346193680867	0.0619452921898	0.0017665390922200002	0.0017665390914900002	0.58832794876	0.420590279001	3.04126391032	0.213243355132			0.809048064189	ENSG00000012822	0.123533387712	0.17730691894499997	19.6224161052	202.0	False	False	True	False	False
ENSG00000012963	0.00354755834973	0.00354755837858	0.0035475584046500003	0.081640696152	0.00354755853565	0.00354755835349	0.900621511826	1010592856250.0	9539957.8826	0.10537598679400001	-0.630842663597	0.27149287321800003	0.765658990323	Q8N806	Q8N806	UBR7	0.617512300551	0.05620580462040001	0.05091053962119999	0.0029621261564000004	0.272409229051	3.79382133955	15.962454363900001	0.12202217697000001			0.9399197631849999	ENSG00000012963	0.10647040898499999	0.12388410703700001	22.6675223655	202.0	False	False	True	False	False
ENSG00000013016	0.00124206605931	0.0012420658691199998	0.00124206589972	0.00124206591841	0.111029661215	0.00124207932121	0.882759995717	73412139289.9	1409836.93593	0.192183038563	-0.6833037164569999	0.25311327831999997	0.443702647963	Q9NZN3	Q9NZN3	EHD3	0.23468229972100002	0.206694061461	0.00240530586894	0.00240530557787	0.5538130273699999	0.548374396237	4.4552897511500005	0.16621209779999999			0.8384747215080001	ENSG00000013016	0.243620278715	0.42713210534999996	19.3227047228	202.0	False	False	True	False	False
ENSG00000013275	0.081047610733	0.0116834341937	0.0116834342545	0.011683434672	0.011683434179400001	0.011683434525399999	0.860535217442	29125619617000.0	91233959.5011	0.0591535840585	-1.5812456111200002	0.040585146286599996	0.969919735954	P43686	P43686	PSMC4	0.275755112971	0.0335716522591	0.281710506462	0.00462704614109	0.404335682167	42.104306976	39.4535884759	0.164466235309			0.9789086235100001	ENSG00000013275	0.105253480557	0.0501123603981	26.165400855700003	202.0	True	False	False	False	False
ENSG00000013374	0.07767088650769999	0.00287714458851	0.00287714473014	0.0028771444759	0.08249337274389999	0.0028771448548600004	0.828327162099	339397815154.0	4748178.938159999	0.122695163553	-0.7102332301800001	0.241335333833	0.664766334108	H3BM14	H3BM14	NUB1	0.26838581742	0.20910043375999998	0.006250225362310001	0.0491291223206	0.467134401137	0.969730391997	10.5729283633	0.09313870898460001			0.9097725325229999	ENSG00000013374	0.158503296832	0.295975940011	21.0851328105	202.0	False	False	False	False	False
ENSG00000013375	0.0174924666329	0.0028310395879800002	0.0028310395774499997	0.00283103970546	0.00283103963808	0.0028310424014000002	0.968352332457	8857015170830.0	26907128.1171	0.110605404321	-0.04992458921659999	0.494223555889	0.8911559522920001	O95394	O95394	PGM3	0.120784707907	0.150082571701	0.220591576968	0.00163730709214	0.506903836332	3.85991197444	12.6424470073	0.155402341592			0.922996027109	ENSG00000013375	0.058514584560400006	0.0586920315195	24.456633171999997	202.0	False	False	False	False	False
ENSG00000013441	0.0012934815095999998	0.0738735077216	0.00129348144994	0.019613688480000002	0.0502513154906	0.054358397336599994	0.799316128012	447684717064.0	3663838.54885	0.182620617384	0.199205615311	0.5876969242310001	0.62253394344	P49759-3	P49759	CLK1	0.011895411854100002	0.055803981551800004	0.0008333904802999999	0.000833390495963	0.930633825618	3.42370739335	6.71977659858	0.27535532864900003			0.8725948430320001	ENSG00000013441	-0.0630902526005	-0.04820289276959999	21.905538495100004	202.0	False	False	False	False	False
ENSG00000013503	0.0057182287746	0.00818068218216	0.00571823297155	0.0323629090521	0.143671749126	0.0441419867551	0.760206211138	2761352482080.0	18175169.1525	0.09142868261949999	-0.7150070310100001	0.23953488372099999	0.8480234040960001	Q9NW08	Q9NW08	POLR3B	0.235298696794	0.190253174241	0.19582739768500002	0.00105401190415	0.377566719376	1.1752496619600001	4.48473213257	0.24172889076600002			0.839039495209	ENSG00000013503	0.18918788040399998	0.104343635629	23.850346783000003	202.0	False	False	True	False	False
ENSG00000013573	0.000595846022572	0.0005958460223330001	0.00059584602223	0.0559498179352	0.06702079832169999	0.0005958460229800001	0.8746459996529999	601711128396.0	2940579.75629	0.263791658715	1.0418331243799999	0.8096024006	0.586002550446	Q96FC9-3	Q96FC9	DDX11	0.183685644859	0.00870306236909	0.700791970359	0.000539377014636	0.10627994539899999	3.4671961259099997	9.025123401510001	0.20631749471500002			0.897172236504	ENSG00000013573	0.0920927871261	0.13119549709699999	21.0124636552	202.0	True	False	True	False	False
ENSG00000013583	0.00201621497839	0.00201621497003	0.0020162149605	0.00201621496203	0.443698284117	0.0020162149604600003	0.546220641051	3998919743500.0	13400414.747000001	0.149228957118	0.586049669232	0.7067516879219999	0.80961668292	Q9NRV9	Q9NRV9	HEBP1	0.767967138125	0.0263371518715	0.0020220270839000003	0.0020220270839000003	0.20165165583500003	2.4716171295400002	9.59937295695	0.163775047064			0.9022941497229999	ENSG00000013583	0.479259529209	0.583419265348	21.6505822469	202.0	False	True	True	True	True
ENSG00000013810	0.0034424498598300004	0.0034424498635100003	0.0034424498616999998	0.0034424498644899998	0.00344244986039	0.043209687616400004	0.939578063074	15376510309400.0	34460959.3653	0.11378932683399999	0.0925861295484	0.548687171793	0.91313479859	Q9Y6A5	Q9Y6A5	TACC3	0.290136962332	0.060299940092500004	0.0024394302773000005	0.017829065891900003	0.629294601406	37.3526422953	40.2249079043	0.151937720336			0.979259172704	ENSG00000013810	0.324934307587	0.299972446622	23.3999951105	202.0	True	False	True	False	False
ENSG00000014123	0.170198981453	0.0375848033929	0.00752850796667	0.0075285079241600005	0.131096649045	0.066918880232	0.579143669986	4408879875410.0	28317637.7403	0.074149309557	-1.19242806161	0.102475618905	0.8965568974570001	O94874	O94874	UFL1	0.06882886772749999	0.0371958454324	0.5027267140439999	0.0114774968442	0.37977107595200005	2.20485683171	10.7797053474	0.137747367353			0.9113889538050001	ENSG00000014123	0.163984690244	0.107577807172	24.3793310665	202.0	False	False	False	False	False
ENSG00000014138	0.06916648408010001	0.034729996078300004	0.00276109678621	0.08543262298239998	0.00276109675784	0.00276109689321	0.8023876064219999	2220179049750.0	11746492.705	0.126848631668	0.0548386182144	0.5354088522129999	0.7937889130600001	Q14181	Q14181	POLA2	0.234022206386	0.437888974574	0.0023666781156	0.0730048932341	0.25271724769000004	1.1429474959200001	7.74534472518	0.138029650522			0.8841045415600001	ENSG00000014138	0.262456444473	0.27636576411499997	22.602183217600004	202.0	True	False	True	False	False
ENSG00000014164	0.0016268556147300002	0.00162685655464	0.0016268557693399999	0.00162685591483	0.0016268557063400001	0.00162685583224	0.990238864608	98654560362.3	1897871.3959299999	0.165497638995	-0.839312156988	0.197674418605	0.5065636486389999	Q8IXZ2	Q8IXZ2	ZC3H3	0.5047256694860001	0.00451384346226	0.0045138431731000005	0.004513843202779999	0.481732800675	1.24575183318	9.35521676404	0.119305897664			0.900190854561	ENSG00000014164	0.168664994299	0.29249979097600004	19.838796135	202.0	False	False	True	False	False
ENSG00000014216	0.004709906437430001	0.113560429671	0.00470990646755	0.004709906428930001	0.168819987306	0.0421386738753	0.661351189813	21465253220800.0	45388754.5587	0.10207508305	-0.09846032793410002	0.477194298575	0.935038631761	P07384	P07384	CAPN1	0.22128008893599999	0.31952271694	0.150832657673	0.001632377355	0.306732159096	12.5751660677	23.6046026528	0.150231211801			0.960290566332	ENSG00000014216	0.468333132207	0.387843413829	23.6553390592	202.0	True	False	True	False	False
ENSG00000014641	0.0389507072926	0.0008303464446549999	0.0008303468798010002	0.128133275249	0.0008303465715760001	0.0008303463894480001	0.829594631173	909196929112000.0	125376833.4	0.24049811860800002	2.39485814762	0.9551387846960001	0.979071337484	P40925	P40925	MDH1	0.29069733998799996	0.00830265279551	0.360356902558	0.0031767518133300004	0.33746635284500004	46.8821008044	50.99498904	0.134269085012			0.984361610968	ENSG00000014641	0.213869872144	0.28636614635	25.230321055300003	202.0	False	False	False	False	False
ENSG00000014824	0.0014115548986900002	0.120944382837	0.001411554897	0.0014115548988699997	0.135104955956	0.045682294802	0.6940337017110001	490660274923.0	3611588.19468	0.19395108977400002	0.361655196457	0.642610652663	0.620058510239	Q6PML9	Q6PML9	SLC30A9	0.349061851117	0.27377299548	0.00421740667633	0.0466826614946	0.326265085233	3.7376406671499995	18.8500911525	0.10256172544299999			0.9492287917739999	ENSG00000014824	-0.023857450099499997	-0.0676772805945	22.0247513138	202.0	False	False	True	False	False
ENSG00000014919	0.00120601099969	0.055552470959099993	0.0012060110536700002	0.423312693452	0.0012060124133900002	0.0036637811822	0.51385301994	698928746153.0	5503088.71244	0.151918246003	0.0405345872703	0.530157539385	0.686520141025	Q7KZN9-2	Q7KZN9	COX15	0.260274101858	0.254946214361	0.00458369914249	0.00458369914238	0.475612285496	1.7303421076199998	13.297820854400001	0.0989203194698			0.9271636675239999	ENSG00000014919	0.183810426171	0.313861676187	21.1584544223	202.0	True	False	True	True	False
ENSG00000015133	0.00507001457513	0.0027589261217399997	0.0027589235121599997	0.00275892351293	0.00275892355263	0.0638867244361	0.920007564289	3300029116820.0	14009298.218	0.129670894167	0.19787155469300002	0.587396849212	0.815842772485	Q9P219	Q9P219	CCDC88C	0.55502087705	0.010188975628200002	0.00210316364988	0.0863354881028	0.346351495569	1.3944981691999998	6.5046854000800005	0.18154432496599998			0.8697320246160001	ENSG00000015133	0.16775929191800001	0.146796220209	23.3005974513	202.0	False	False	False	False	False
ENSG00000015171	0.00168478853228	0.019042582381400004	0.0016847885342299999	0.332265417518	0.154576358323	0.00168478853543	0.489061276175	185564250155.0	3042808.88556	0.14157040670399998	-0.715064564365	0.239459864966	0.5919285875029999	Q15326-3	Q15326	ZMYND11	0.328751254151	0.00401330263819	0.32432551844999996	0.00445087239303	0.33845905236699997	0.804588211362	8.594226743710001	0.104371043353			0.8930824959100001	ENSG00000015171	0.219616762632	0.317778415289	20.4944200124	202.0	False	False	False	False	False
ENSG00000015475	0.00581124527656	0.0012225632966500002	0.00122256329684	0.0012225632964900002	0.286390443383	0.00122256329648	0.702908058154	611458989482.0	4404518.016009999	0.17753552811599999	0.275418146184	0.6125281320329999	0.65306428625	P55957	P55957	BID	0.107881141503	0.00110918536424	0.611379298939	0.00110918538056	0.278521188814	0.803598862907	4.95122208558	0.18105363555100001			0.8469852769339999	ENSG00000015475	0.266817101151	0.323743454686	21.2036296493	202.0	True	False	True	False	True
ENSG00000015479	0.026497847656400002	0.00283090073171	0.0028309012358899996	0.466820965572	0.022250964426599996	0.0028309020384000004	0.475937518339	480399879953000.0	225560149.54799998	0.0971715367891	-0.40471981555799996	0.356339084771	0.990623359088	A8MXP9	A8MXP9	MATR3	0.09589886813130001	0.146316662523	0.0701156653634	0.006074190422659999	0.6815946135600001	27.388493382399997	62.3916500659	0.08387984124839999			0.987516553712	ENSG00000015479	0.09947331001319999	0.129204926799	26.9873491812	202.0	False	False	False	False	False
ENSG00000015676	0.0030264827246499998	0.00302648444977	0.00302648270682	0.00302648318732	0.262827283272	0.00937630930617	0.7156904743539999	1549290831040.0	10186826.7793	0.12218771802799999	-0.151698369243	0.45603900975199996	0.773910434326	Q8IVD9	Q8IVD9	NUDCD3	0.551825667743	0.272708682593	0.00229963423175	0.00229963418005	0.170866381252	0.865298683799	7.00896945278	0.13271770232400001			0.875788735686	ENSG00000015676	0.12395039113600001	0.14058142758199998	22.8232978816	202.0	True	True	True	True	True
ENSG00000016391	0.000565023749105	0.000565023753383	0.0005650237498119999	0.000565023774315	0.0005650237799930001	0.0598295461003	0.9373453350929999	680643302691.0	2185010.14252	0.37757769468	1.66712004208	0.900300075019	0.5331182957020001	Q8NE62	Q8NE62	CHDH	0.0944024208081	0.0023014140113200004	0.00230141399216	0.0568241151829	0.844170636005	0.262689019038	2.7391681502	0.187112269379			0.80156968139	ENSG00000016391	0.21585791207	0.42182141380500005	20.2182947761	202.0	True	False	True	False	False
ENSG00000016864	0.00126138044285	0.00126138043917	0.0012613804369600002	0.00126138044629	0.0012613804392	0.13922912094	0.854463976855	231087211101.0	2574814.49085	0.18669900826400002	-0.145925436524	0.458589647412	0.563273572875	Q68CQ7	Q68CQ7	GLT8D1	0.152281755943	0.0939949410323	0.007597198913680001	0.00759719379408	0.738528910317	0.7432376458740001	10.0202299388	0.08603717894139999			0.905663316974	ENSG00000016864	0.09915028913660001	0.27115459794	20.3202878271	202.0	False	False	True	False	False
ENSG00000017260	0.0654812049888	0.031388868270700004	0.00412746256344	0.034617236214300004	0.00412746267699	0.00412746251552	0.8561303027699999	2561442512110.0	13639441.9995	0.117339897161	-0.100490895419	0.47651912978200006	0.8118670767380001	P98194-5	P98194	ATP2C1	0.08831136859279999	0.0282513956201	0.0530469367166	0.004383150651789999	0.826007148419	3.3833551193799996	16.9301846102	0.10864558888699999			0.9434447300769999	ENSG00000017260	0.11800894262299999	0.148633881209	23.0720226662	202.0	False	False	False	False	False
ENSG00000017797	0.00812670095679	0.0062963046531899994	0.00629630471185	0.0062963048558800005	0.0062963057502500005	0.00629630484849	0.960391774224	180052226167.0	4728964.31606	0.089729079142	-1.6173617356299999	0.0369842460615	0.663866176581	Q15311	Q15311	RALBP1	0.0329704792934	0.000951161048449	0.764379203054	0.0023838065986500003	0.19931535000599998	17.7154430577	29.8220425407	0.14113626617900002			0.970281218353	ENSG00000017797	0.0183109284382	0.0119551451557	22.1047251323	202.0	True	False	True	False	False
ENSG00000018189	0.00300848336861	0.0030084849422199996	0.00300848337536	0.0030084834978499997	0.10566237242599999	0.0587479535578	0.823555738833	388987117741.0	5031101.56351	0.12396655283399999	-0.622558735212	0.274268567142	0.67331783062	Q7L099-4	Q7L099	RUFY3	0.11046594734300001	0.00881159311297	0.376971877522	0.00212912772069	0.501621454301	0.550128520937	5.26919874729	0.140762671522			0.851892965646	ENSG00000018189	0.470535926252	0.497180085182	20.950743953699998	202.0	False	False	False	False	False
ENSG00000018510	0.0212763773576	0.037261322587900006	0.004604469437680001	0.00460446943946	0.308281396672	0.00460446948912	0.619367495016	13630837012100.0	36997479.9484	0.09979048168230001	-0.260781433452	0.41425356339100006	0.9199609931739999	O00116	O00116	AGPS	0.387658221328	0.0852171884561	0.0033205179251999998	0.003320518129	0.520483554161	2.01578095501	11.492959680899999	0.12353493348099999			0.916023993145	ENSG00000018510	0.338070280756	0.29072954507	24.0663958468	202.0	True	False	True	False	True
ENSG00000018610	0.00278625875137	0.00278625861784	0.00278625927471	0.00278625891724	0.10708983591900001	0.0027862586030800002	0.8789788699169999	265107027935.0	3907441.0773199997	0.13177049662100002	-0.694135929532	0.24778694673700002	0.632360663116	Q9H5V9-3	Q9H5V9	CXorf56	0.29918640611999997	0.00131848433607	0.0013184843361500002	0.00131848433927	0.6968581408679999	7.09056899618	11.3480203699	0.234649934324			0.915167095116	ENSG00000018610	0.37277917355400003	0.358180693306	20.5934098976	202.0	False	False	False	False	False
ENSG00000018625	0.00122696795141	0.0202745158015	0.0012269680001400001	0.00122696800195	0.160035371819	0.0821683501754	0.7338408582510001	7139616518120.0	13947811.4415	0.191571709739	1.3222974998600001	0.858364591148	0.8153176805940001	B1AKY9	B1AKY9	ATP1A2	0.29578532846	0.08568582298689999	0.00020578646728799997	0.000205786467094	0.618117275619	39.038886067600004	16.7332251271	0.37339547829899994			0.94274363169	ENSG00000018625	0.6480327193959999	0.339625108439	22.3165881008	202.0	False	False	True	False	False
ENSG00000018699	0.00284643679069	0.0028464369775700006	0.0466730580623	0.09169228605530001	0.403490408212	0.00284643680607	0.449604937096	2201399444360.0	12546555.6961	0.11825646902300001	-0.11437068013	0.471942985746	0.801890330808	Q6P3X3	Q6P3X3	TTC27	0.42826872159699997	0.132249195735	0.0498184026196	0.00247802789364	0.38718565215499995	3.18503783027	12.986148369	0.137428541378			0.9251966970479999	ENSG00000018699	0.199409540047	0.24351581922499999	22.63929431	202.0	False	True	True	True	True
ENSG00000019144	0.0033363064390000002	0.07073980347589999	0.00333630640289	0.10229760745500001	0.0167676853312	0.00333630641796	0.8001859844779999	717660830266.0	7440644.64933	0.11385420041099999	-0.6023554251259999	0.281170292573	0.73077788613	Q86UU1-2	Q86UU1	PHLDB1	0.308489222469	0.00758080992114	0.0075808096876899995	0.026098853182200003	0.65025030474	0.0956126101913	2.93827886916	0.10523605890000001			0.806496845057	ENSG00000019144	0.25959182861900004	0.380059938387	22.0633623198	202.0	False	False	False	False	False
ENSG00000019582	0.026366573139	0.00241044058021	0.00048572049323800006	0.246527974742	0.000485720586926	0.0734037776073	0.650319792851	426242812889.0	2598353.82694	0.251263985641	0.725089194824	0.7421605401350001	0.56507388793	P04233-2	P04233	CD74	0.39719994783600004	0.0026776460386899997	0.0007139329044110001	0.015318379933899999	0.584090093287	9.7392756357	12.4088505879	0.25149640024799996			0.9216522551999999	ENSG00000019582	0.726438730218	0.804278793566	18.2554614648	202.0	False	False	True	False	False
ENSG00000020129	0.0030764554727099997	0.00307645552868	0.0030764558214699993	0.00307645543432	0.214638685062	0.00307645568507	0.769979036996	1049728922480.0	8784445.7414	0.116633743999	-0.408851554089	0.354388597149	0.7543320081010001	Q9UBB6	Q9UBB6	NCDN	0.154990112653	0.0579102402576	0.553112809842	0.00101221371664	0.232974623531	1.93071247301	8.026910626689999	0.173105303467			0.887084209706	ENSG00000020129	0.0947221376831	0.0759939108726	22.7813791683	202.0	False	False	False	False	True
ENSG00000020426	0.00172957413629	0.0017295741389600002	0.0017295741388800002	0.304694084912	0.0017295741600299999	0.00172957422563	0.686658044288	1253253749140.0	8302233.54594	0.134841805849	-0.0392938531234	0.49857464366099996	0.7463056034810001	P51948	P51948	MNAT1	0.164839452162	0.0212480766613	0.07539725363199999	0.00302640293973	0.735488814605	3.06174799018	8.05286493163	0.21728728120000002			0.8873568590790001	ENSG00000020426	0.201509863231	0.182525943233	22.3991086124	202.0	True	False	False	False	False
ENSG00000020922	0.006006569159390001	0.00600656920828	0.00600656927963	0.00600656918136	0.00600656931386	0.00600656916109	0.9639605846960001	5405682466720.0	27122259.5429	0.0857234020169	-0.783430184755	0.21687921980500002	0.891981096692	F8W7U8	F8W7U8	MRE11A	0.449277362988	0.13173720200300001	0.200433689201	0.0025015675583600003	0.21605017824900002	2.7997732301599996	13.7304810851	0.121864068773			0.929481187193	ENSG00000020922	0.141761816515	0.147351226994	24.109662844200002	202.0	False	False	True	False	False
ENSG00000021355	0.0330343853225	0.00119773229994	0.00119773186928	0.00119773558514	0.39460567821000003	0.0011977318876500002	0.5675690048250001	3829981555540.0	9705823.79435	0.201635008856	1.25549054812	0.846736684171	0.767309279124	P30740	P30740	SERPINB1	0.0771104496698	0.00152406680107	0.0015240656334600002	0.0015240655287000002	0.918317352367	1.6350997834	5.889262345519999	0.21712569894699998			0.8606372205339999	ENSG00000021355	0.339694338908	0.334844719357	22.2470900875	202.0	False	True	True	True	True
ENSG00000021574	0.00691522432098	0.0069152244171599994	0.006915282521329999	0.006915231118770001	0.006915303392340001	0.006915224303030001	0.9585085099259999	235562563370.0	6073364.09176	0.0799141746451	-1.74407513449	0.0268567141785	0.700322556447	Q9UBP0-3	Q9UBP0	SPAST	0.354139014446	0.0393065373713	0.0748373969437	0.00354059505436	0.528176456184	1.8809677151099997	11.8847520164	0.11539860168600001			0.918283087949	ENSG00000021574	0.129960080853	0.09708274415899999	22.1769699633	202.0	True	False	True	False	False
ENSG00000021762	0.0224680033628	0.00138085723509	0.0013808564012600002	0.14640546680299998	0.11375641987400001	0.0338105934653	0.6807978028589999	17561327810.8	818891.506437	0.161827493781	-1.50471117877	0.0501875468867	0.314905108394	Q9H0X9	Q9H0X9	OSBPL5	0.280175204912	0.041028517208800006	0.335294614042	0.0258784846534	0.317623179184	0.095823110189	1.788396862	0.17308970282400002			0.7729609721899999	ENSG00000021762	0.300125262962	0.591477165586	18.7239842747	202.0	False	False	False	False	False
ENSG00000021776	0.00290775935575	0.015329343821399999	0.0029077593204499996	0.165322104237	0.0029077596164299997	0.0616352742301	0.748989999419	15249270992900.0	28708058.0188	0.136025623694	0.561237956777	0.700975243811	0.897907133748	O60306	O60306	AQR	0.699815884026	0.0151275177965	0.0018403700973299998	0.00184037009415	0.281375857986	6.065332086440001	15.4363099412	0.159545221772			0.937563293604	ENSG00000021776	0.117945716465	0.0834937067654	24.427275603200002	202.0	True	False	True	False	False
ENSG00000021826	0.0368157468361	0.0518191065706	0.0008744532877000001	0.000874453421619	0.34859062779700006	0.0512117361007	0.509813875986	5046475876120.0	10316454.8784	0.217752734615	1.5253095664200003	0.884621155289	0.775485709999	P31327-3	P31327	CPS1	0.364105100296	0.000546816612664	0.000546816612415	0.163318062099	0.47148320438	1.05732233934	3.02690971421	0.339706797345			0.808794889772	ENSG00000021826	0.735339438916	0.554879066455	22.1683223948	202.0	False	True	True	True	True
ENSG00000022267	0.0339292382431	0.00342594875076	0.00040507658308499997	0.00040507658095799995	0.0577410573545	0.00040507658080699997	0.903688525907	47854111970000.0	22819805.9545	0.303143097284	2.8223424629799996	0.9726181545389999	0.875478208687	Q13642-4	Q13642	FHL1	0.40456893397699994	0.0005293143447669999	0.000529314335239	0.0262607730473	0.568111664296	21.328505137	12.9884782201	0.355567401977			0.9252161720029999	ENSG00000022267	0.6758004878849999	0.662524274553	21.930680659	202.0	True	False	False	False	False
ENSG00000022556	0.000156949839403	0.0973873081153	0.00015694984435799997	0.00015694984344999998	0.24942054797200003	0.0249050834801	0.627816210905	404366082164000.0	44845387.0234	0.448404109076	4.1659020045599995	0.994823705926	0.9343635136149999	Q9NX02-5	Q9NX02	NLRP2	0.217340649995	0.09460786116239998	4.15840279244e-05	4.1578646156e-05	0.687968326168	95.79690669950001	14.872234334100002	0.6581115656490001			0.934836799875	ENSG00000022556	0.8723029342409999	0.489169326288	23.544633291900002	202.0	True	False	True	True	True
ENSG00000022840	0.0039994369602999996	0.0305281148502	0.00202850207869	0.00202850228366	0.057408479746	0.0020285022023499998	0.9019784618790001	221634825775.0	3130911.40062	0.150365507126	-0.510043179924	0.315828957239	0.597629585177	Q8N5U6	Q8N5U6	RNF10	0.510953129306	0.00743495771739	0.00615245310326	0.0061524517656599996	0.469307008108	9.43448509628	33.2597777986	0.09235060776699999			0.97419568435	ENSG00000022840	0.159037668703	0.34028106954000004	19.816314342200002	202.0	False	False	False	False	False
ENSG00000023191	0.08581042956189999	0.00212738143698	0.00212738111925	0.14636093649	0.26374660918299997	0.031549234462599995	0.46827802774599997	7003415065540.0	20771988.6232	0.127402179305	0.294721280726	0.62048012003	0.8644512789740001	P13489	P13489	RNH1	0.268379358706	0.147470697738	0.015011729867	0.0520493967639	0.517088816925	0.421583959756	4.7656563955	0.136244604607			0.843713484459	ENSG00000023191	0.37020394396	0.440219424774	23.162038513400002	202.0	True	False	True	False	True
ENSG00000023228	0.161789807971	0.0034630703124799997	0.0034630703081999998	0.0034630707294499995	0.06257071611840001	0.0034630703411	0.7617871942190001	32189534440500.0	52270238.9404	0.10854326032299999	0.143733306165	0.569167291823	0.9429150101270001	P28331-2	P28331	NDUFS1	0.644325620975	0.049815912823099995	0.0036197393709200003	0.10014181259400001	0.20209691423700002	1.70348875683	11.2316796208	0.116205030465			0.9144075718629999	ENSG00000023228	0.0315463988809	0.043600802094	25.4770710787	202.0	True	False	True	False	False
ENSG00000023287	0.013341364838399998	0.00543333448249	0.00543333448358	0.00543333504567	0.00543333472326	0.024300909937400004	0.940624386489	1593074788130.0	12848429.7561	0.0982354022378	-0.638620075243	0.268192048012	0.804290750881	Q8TDY2-2	Q8TDY2	RB1CC1	0.07446131518400001	0.000956269779021	0.80960496532	0.007242896054989999	0.10773455366200001	6.39828317495	19.6467774195	0.128747973982			0.9516826361299999	ENSG00000023287	-0.018464575041	-0.012462840639200001	23.648240680700003	202.0	True	False	False	False	False
ENSG00000023318	0.00369665518173	0.00369665518326	0.0036966551435	0.0036966636308699997	0.142922832507	0.0866123327606	0.755678205593	14758121749900.0	33106406.7799	0.116038871743	0.13697765342	0.56624156039	0.909534168479	Q9BS26	Q9BS26	ERP44	0.12828057369	0.00115966492525	0.584261690354	0.0011596649397300001	0.285138406091	4.48454152092	13.8874617275	0.152488168978			0.930493884864	ENSG00000023318	0.150718307882	0.14139430310999998	24.439407890100004	202.0	False	False	False	False	False
ENSG00000023697	0.0365232900905	0.00145965231084	0.0014596523087699999	0.00145965232492	0.21230096558699998	0.0014596523165800001	0.7453371350620001	3338154035390.0	10800604.7414	0.16916289677700003	0.830977961783	0.768567141785	0.7819368389470001	Q9Y315	Q9Y315	DERA	0.23634237724399998	0.0670470103579	0.0015592277501700002	0.00155922679742	0.69349215785	4.75728870836	11.2440957225	0.19397922509799997			0.914563371504	ENSG00000023697	0.48774478303400004	0.569843577233	21.2604164506	202.0	False	False	False	False	True
ENSG00000023734	0.00630044464072	0.00630044568187	0.0063004446379	0.19132779741	0.00630044475726	0.00630044463829	0.777169978234	91647037496000.0	125250261.781	0.0764329414288	-0.91242055793	0.17584396099	0.978996324357	Q9Y3F4-2	Q9Y3F4	STRAP	0.24402533059999998	0.00418226128039	0.23673039109000002	0.00418226128031	0.510879755749	198.829188703	143.427432962	0.0983122973258			0.996202383735	ENSG00000023734	0.215749068243	0.19291417962299998	25.5046476396	202.0	True	False	False	False	False
ENSG00000023892	0.0014503067682699999	0.0014503067180000001	0.0014503068454499999	0.00145030691226	0.056125731025499996	0.0014503067052399998	0.9366227350249999	225750381397.0	2609288.77135	0.182092517817	-0.19745247403299998	0.437059264816	0.566049058585	Q9H4E7	Q9H4E7	DEF6	0.0611945362649	0.0741555193508	0.15487319205	0.00123193309962	0.708544819234	0.696608523643	3.1414012807200002	0.265687410255			0.811657708187	ENSG00000023892	0.052566625119599995	0.04965370012400001	21.173450914	202.0	False	False	True	False	False
ENSG00000023909	0.0192235329759	0.00172592132327	0.00172592129139	0.0017259258094799999	0.07161657530019999	0.0017259280629000001	0.902256195237	1368859088570.0	7492204.5922300005	0.156159979609	0.313402748929	0.626256564141	0.731453004276	P48507	P48507	GCLM	0.0696679736768	0.0328589526886	0.0751186715646	0.0023195385414000002	0.820034863529	0.664344628806	4.87475230495	0.167203036711			0.845758354756	ENSG00000023909	0.22237961320799998	0.256677310484	22.136325332	202.0	False	False	True	False	False
ENSG00000024048	0.0040315381924	0.00403153818516	0.0422741363854	0.0040315381840400006	0.004031538201800001	0.00656482841171	0.93503488244	1933116519970.0	13488655.5464	0.103076663334	-0.478928328963	0.328657164291	0.8100667616830001	Q8IWV8-4	Q8IWV8	UBR2	0.06862826168330001	0.00290422910088	0.24102635229400002	0.00290422928467	0.6845369276369999	0.662696838349	6.219194744279999	0.130895071007			0.865467009426	ENSG00000024048	-0.0649920278259	-0.0630126504498	23.8612682684	202.0	False	False	False	False	False
ENSG00000024422	0.10274463907199999	0.0263032572841	0.0008046545362289999	0.112620561417	0.0008046545203400001	0.0008046545151149999	0.755917578655	287894996643.0	2548241.47097	0.21056029449799998	0.185143165552	0.5831957989500001	0.560573100293	Q9NZN4	Q9NZN4	EHD2	0.260829423326	0.0003593389461530001	0.323240662615	0.0572374853163	0.358333089797	5.011550715369999	6.73681682881	0.332300753147			0.872731167718	ENSG00000024422	0.617644203707	0.529373159828	19.7175841163	202.0	False	False	False	False	False
ENSG00000024862	0.0516313624661	0.00203001000432	0.00203001000116	0.09912748625880001	0.00203001000121	0.008144421143100001	0.835006700125	224551509826.0	3478166.13298	0.136240951392	-0.688718265006	0.250187546887	0.614507538819	Q8IWP9	Q8IWP9	CCDC28A	0.203204270552	0.049636625223900006	0.0050668034302	0.050942667519699995	0.691149633274	0.6496878999600001	7.580878608939999	0.10632437702			0.882351795591	ENSG00000024862	0.25730412329	0.425083492078	20.3741156606	202.0	False	False	False	False	False
ENSG00000025293	0.00259995548714	0.00259995566217	0.0025999559524200002	0.0025999558268	0.00259995872646	0.00259995550572	0.984400262839	113397649222.0	2506414.93498	0.134353522113	-1.1359542022799998	0.115303825956	0.557722601455	Q9BVI0	Q9BVI0	PHF20	0.10106784891000001	0.0013472058997899999	0.52786523427	0.00134720588265	0.36837250503700003	5.9339612848000005	17.7651435563	0.137120893013			0.945898574433	ENSG00000025293	0.133162311738	0.11820525205499999	20.7555779273	202.0	True	False	False	False	False
ENSG00000025770	0.00343785651382	0.0034378526445900002	0.0034378527953200003	0.00343786146971	0.0034378554814800005	0.0194906744966	0.963320046599	115353262280.0	3016565.84089	0.11259059954299999	-1.38558240121	0.0666166541635	0.59005325932	Q6IBW4	Q6IBW4	NCAPH2	0.18309143005399997	0.0223687810219	0.229522473043	0.0043318346416	0.56068548124	2.6209250492900003	16.062215163199998	0.100791024939			0.9401729376019999	ENSG00000025770	0.0777018905317	0.105225397518	21.0622686781	202.0	True	False	False	False	False
ENSG00000025772	0.00234105891914	0.00234105891916	0.051078466941	0.061715794973999996	0.16835138235999997	0.00234105892974	0.711831178956	5214448506350.0	15998328.0541	0.142734708869	0.52035434805	0.6879219804950001	0.831970594854	Q15785	Q15785	TOMM34	0.425263130743	0.04451471618530001	0.00321711426535	0.00321711426506	0.523787924541	7.195391720599999	20.9651993491	0.12794644538			0.954818103918	ENSG00000025772	0.311527256553	0.301073884245	22.566656748299998	202.0	False	False	True	False	False
ENSG00000025796	0.00626028714193	0.006260287146810001	0.006260287171210001	0.00626028719297	0.20888982025400002	0.006260287150100001	0.759808743943	8360472590490.0	33344428.7391	0.08671458146269999	-0.701636265098	0.24456114028499998	0.910134273498	Q9UGP8	Q9UGP8	SEC63	0.011615746288700001	0.07436738257119999	0.393111988158	0.0034744095098299997	0.517430473473	3.1114136817799998	17.3282781183	0.101794302006			0.9445742774789999	ENSG00000025796	0.334290318252	0.266527167147	23.880228460799998	202.0	True	False	False	False	True
ENSG00000025800	0.00750029624893	0.007500296245020001	0.0075002962248	0.165302939787	0.09278902532120001	0.00950587064659	0.709901275527	4319944110580.0	29672767.5624	0.07004562414900001	-1.34676591583	0.0731432858215	0.900832645713	O60684	O60684	KPNA6	0.160519301578	0.00226840405065	0.6528620335059999	0.014536590581700001	0.16981367028299998	6.0308774859300005	23.7531329251	0.103387814262			0.960602165615	ENSG00000025800	0.026202598929300002	0.017397786698900002	24.7475822437	202.0	False	False	False	False	False
ENSG00000026025	0.122502548026	0.00294158999221	0.00016987814513000002	0.00016987815435199997	0.241485506938	0.0352059296966	0.5975246690470001	1.6699596221e+16	242527901.991	0.532833197727	4.47617264296	0.9969992498119999	0.991898582252	P08670	P08670	VIM	0.38115828836800003	0.00016798795147	0.210716878842	0.00572653105083	0.40223031378799995	736.4125806860001	55.36773107649999	0.490121634072			0.985880657474	ENSG00000026025	0.754942373656	0.841372692277	23.013198897600002	202.0	True	False	True	False	True
ENSG00000026652	0.0027438509157600003	0.0141208531283	0.0027438508441999998	0.0027438505558000006	0.156798146944	0.00287265791732	0.8179767896950001	352963477174.0	4696225.46535	0.126507404449	-0.633525473293	0.270217554389	0.663116045308	Q9NRZ5	Q9NRZ5	AGPAT4	0.0307553634086	0.0492338111859	0.0035621076331	0.0326276947174	0.883821023055	0.45801315908699997	4.82611501066	0.140230121584			0.8448625068160001	ENSG00000026652	0.239998231836	0.303867119206	21.3918981265	202.0	False	False	False	False	False
ENSG00000027001	0.0310033607141	0.053831944903699996	0.0037789196914899993	0.0037789190818000003	0.401767821322	0.00377891941363	0.5020601148730001	5566610140230.0	22067780.5498	0.106914533828	-0.193345862037	0.43863465866499995	0.87150251294	Q99797	Q99797	MIPEP	0.474374046704	0.0602524548178	0.301130456933	0.00162408135832	0.162618960187	1.73596494667	8.10473807279	0.162566663257			0.887785308094	ENSG00000027001	0.397015155609	0.364516130705	23.2156136624	202.0	False	True	False	False	True
ENSG00000028116	0.0035084764648300004	0.0035084764340500003	0.00350847642853	0.00350847647775	0.09867878513119999	0.0337434306032	0.85354387846	588452435853.0	6562232.515980001	0.11689718902999999	-0.60030178202	0.28192048012	0.712024604306	Q86Y07	Q86Y07	VRK2	0.461450282936	0.00574721831856	0.0341753314207	0.00574723210138	0.492879935224	0.704001717116	8.36455558042	0.100309943992			0.8908428760609999	ENSG00000028116	0.14259239999099999	0.217688540109	21.900166684699997	202.0	False	True	False	False	False
ENSG00000028203	0.00126924464396	0.0012692446577	0.00126924468015	0.00126924464373	0.322256624791	0.0228526320572	0.649813764526	348723778252.0	3490557.77	0.16917880406	-0.0608488711383	0.489647411853	0.6151826569650001	F8W8C2	F8W8C2	VEZT	0.292075102317	0.122018215328	0.00395458624519	0.0949276954916	0.487024400618	1.1266833037700001	8.80624380605	0.12053418183299999			0.8954389654899999	ENSG00000028203	0.207320275016	0.342346382477	20.5891478231	202.0	False	False	False	False	True
ENSG00000028310	0.0009494470523010001	0.000949478021243	0.0009494465977789999	0.160448511784	0.0009494485958200001	0.061188016616099995	0.774565651333	431164594516.0	3237576.58703	0.202815664536	0.38868183257700006	0.651462865716	0.604005700998	Q9H8M2	Q9H8M2	BRD9	0.188336377572	0.09602718718489998	0.00660847470645	0.00660847482208	0.702419485714	0.29946342292100003	5.23798216367	0.10447391678099999			0.8514060917659999	ENSG00000028310	0.10844736491399999	0.245781435794	20.9562004247	202.0	False	False	True	False	False
ENSG00000028528	0.00420782180733	0.01486391451	0.00420782176905	0.159135619004	0.00420782238527	0.0042078219482699995	0.809169178576	2990396373220.0	18326738.6428	0.09435810106519998	-0.620365623829	0.274943735934	0.849673692896	Q13596	Q13596	SNX1	0.23559309035700002	0.0480899390228	0.43626179076300003	0.00210154854906	0.277953631308	0.7434735119529999	6.4652381625199995	0.133366950945			0.86914777596	ENSG00000028528	0.442446965533	0.433174349213	22.8379965461	202.0	True	True	True	True	False
ENSG00000028839	0.00174486279641	0.00174486269505	0.03634634250430001	0.00174486271156	0.00174486288653	0.022305572663599997	0.934368633742	382357562121.0	4122413.9730300005	0.14999723049799998	-0.276627217582	0.40855213803499996	0.640837146501	P62380	P62380	TBPL1	0.221782272456	0.16480671654200002	0.34244336512699997	0.00228636816517	0.26868127771	1.23806288209	8.23380995168	0.135135829891			0.889206979824	ENSG00000028839	0.126788631574	0.214139866978	21.2700427932	202.0	True	False	False	False	False
ENSG00000029363	0.0058663147718199995	0.00586631462289	0.0058663146733	0.08274248222830001	0.00586631458056	0.005866314580289999	0.887925944543	52490655505700.0	85356436.1538	0.08487987361580002	-0.5269345842459999	0.30832708176999996	0.966994223989	Q9NYF8-2	Q9NYF8	BCLAF1	0.00112719331937	0.0249515867454	0.0011271928435799999	0.00112719285134	0.97166683424	32.994429404	27.664391280700002	0.20763434516399998			0.9672041754299999	ENSG00000029363	0.050453996591499996	0.019426142004499998	26.2444278271	202.0	False	False	False	False	False
ENSG00000029534	0.036813319103	0.00175371680201	0.0009630631042739999	0.091742575082	0.187153956035	0.04935216041690001	0.632221209457	331055923084.0	2588003.49385	0.22232373143000003	0.36584817986199997	0.6444861215300001	0.5643237566570001	P16157-3	P16157	ANK1	0.494312470353	0.0009300361478480001	0.0009300362687939999	0.0367582839464	0.467069173284	0.48011163989699995	1.8890558815	0.36679745384199997			0.7767391134999999	ENSG00000029534	0.503958790883	0.5015091998910001	20.4730986972	202.0	False	True	True	True	False
ENSG00000029639	0.00198465423672	0.118390005549	0.00198465416757	0.00198465424835	0.0948122269502	0.00198465417973	0.7788591506679999	2325096911710.0	9987852.099310001	0.152668144393	0.47544769009599996	0.675393848462	0.771059935489	Q8WVM0	Q8WVM0	TFB1M	0.27656362035300003	0.127202522588	0.14372422721699998	0.00224961799287	0.45026001185000003	1.73000844502	8.67407208807	0.15163556871			0.8939978188050001	ENSG00000029639	0.424817291082	0.41860412567	21.845177388099998	202.0	False	True	True	True	False
ENSG00000029725	0.00180015230204	0.00180015286532	0.0970074840956	0.322878388857	0.0141353844224	0.00180015383372	0.560578283624	3222600121440.0	13670663.0462	0.13131478610400002	0.22500948551	0.595723930983	0.812317155502	Q15276	Q15276	RABEP1	0.28653736713000005	0.146705768151	0.231515447493	0.0028926910085700004	0.332348726218	2.9532487926999997	14.637152161500001	0.117406848316			0.934038326712	ENSG00000029725	-0.0135012295585	-0.0165256074585	23.7678193003	202.0	True	False	False	False	False
ENSG00000029993	0.00142748089573	0.0735348419569	0.00142748111448	0.0014274813409899999	0.13604419463700002	0.00142748094319	0.784711039111	142324064148000.0	66694306.4066	0.17887531352000002	1.64051248584	0.89759939985	0.9558922811489999	O15347	O15347	HMGB3	0.44279821547799997	0.0026051602693500002	0.00122324122625	0.00122324008303	0.552150142944	54.06168705060001	32.1301852823	0.22883980399999998			0.972988237127	ENSG00000029993	0.452431545705	0.48551617672799996	23.5284926943	202.0	False	False	False	False	False
ENSG00000030066	0.00606907908853	0.0686626329278	0.00606907902994	0.006069079453850001	0.0060690790344200005	0.0179527973375	0.889108253128	14500376337200.0	42015615.7868	0.0906314449233	-0.48009059203599996	0.32790697674400004	0.9297126997220001	Q12769	Q12769	NUP160	0.41855247963500003	0.188818700623	0.0399363041806	0.0016821045385999997	0.351010411023	16.9151281961	26.652515296799997	0.154311909543			0.965490379372	ENSG00000030066	0.147540218935	0.0988314882267	24.8421591502	202.0	True	False	True	False	False
ENSG00000030110	0.0011024394741700001	0.0011024404473499998	0.0011024395047100001	0.310073822511	0.143391652185	0.022058209492799997	0.521168996385	91760322546.8	1832153.71003	0.165335289207	-0.868500515452	0.18927231807999997	0.49936238841799996	Q16611	Q16611	BAK1	0.14726393650900002	0.295881502808	0.0783435102009	0.00181002804183	0.47670102243999996	7.62380066283	19.3503356649	0.142691223956			0.95078678819	ENSG00000030110	0.031279484774099996	0.047935055983600004	20.60466445	202.0	True	False	True	False	False
ENSG00000030582	0.0009752133250680001	0.000975213392811	0.000975213510092	0.30010717678599996	0.000975213356968	0.0977471275011	0.598244842128	716810784644.0	5007912.45309	0.169061818977	0.268256139689	0.609977494374	0.6726427124750001	P28799	P28799	GRN	0.333205494002	0.169519369992	0.00245746815639	0.00245746815638	0.49236019969300004	19.5701391186	32.4933626088	0.136145189073			0.9735140609180001	ENSG00000030582	0.0503690566916	0.063140215578	21.8796830073	202.0	True	False	False	False	False
ENSG00000031691	0.00119208993815	0.0363125947781	0.00119208987074	0.00119209012994	0.10677388138800001	0.0011920898501300002	0.852145164045	172981581134.0	2160788.77152	0.19248088943799999	-0.289786763507	0.402775693923	0.530642862501	Q7L2Z9	Q7L2Z9	CENPQ	0.595193237685	0.00156902208927	0.00156902207742	0.008945311844110002	0.39272340630400004	6.00424622112	12.7783005133	0.191759173545			0.923911350004	ENSG00000031691	0.21123957594099999	0.24139789250500002	20.1054896738	202.0	True	False	True	True	False
ENSG00000031698	0.0017588098445399998	0.00175880608908	0.0017588263984200001	0.0017588083776	0.145206964605	0.00175891532753	0.8459988693580001	47946293843600.0	54245230.0429	0.127648573562	0.626177221858	0.716729182296	0.9449403645640001	P49591	P49591	SARS	0.040125905149300006	0.314054640152	0.145663115128	0.0015147281768499998	0.49864161139300006	32.085115275	35.8595153328	0.157960095094			0.976221079692	ENSG00000031698	0.186291352113	0.179415676221	24.749346593200002	202.0	False	False	False	False	False
ENSG00000031823	0.016287036712100002	0.030613098622599998	0.00276672925735	0.0027667293878099997	0.00276672933135	0.0027667292573099996	0.9420329474310001	8192495149030.0	24065196.7937	0.11893746531199999	0.134227508425	0.5646661665420001	0.880429075088	Q9H6Z4-3	Q9H6Z4	RANBP3	0.200876027348	0.00631725095505	0.261821578598	0.00631725095435	0.524667892144	0.794555416095	10.5522164645	0.0844730946211			0.9095972579260001	ENSG00000031823	0.164882483587	0.244533811451	23.636153764899998	202.0	False	False	False	False	False
ENSG00000032219	0.00199090245993	0.0019909025407600003	0.0019909024476	0.00199090246694	0.00199090245747	0.060630164425300004	0.9294153232019999	111174317376.0	2188638.42315	0.152345003964	-0.949820491669	0.163315828957	0.533268321956	P29374	P29374	ARID4A	0.13356436445	0.152457143001	0.53909081357	0.000846084216171	0.17404159476199998	0.53100815422	3.10765969704	0.23448611951499998			0.8108787099789999	ENSG00000032219	0.0054158986696300005	0.00523747922806	21.0163328007	202.0	True	False	False	False	False
ENSG00000032389	0.00390811050824	0.0559275698867	0.0039081105104	0.123735720656	0.00390811051286	0.0671704875832	0.741441890343	316002105157.0	5247330.97164	0.107128871495	-1.00513298903	0.147711927982	0.6790938414219999	A8MUM1	A8MUM1	TSSC1	0.221990424314	0.065933121449	0.272542975121	0.015574958295	0.423958520822	0.190931471351	3.88349712785	0.112516385244			0.8276661213680001	ENSG00000032389	0.180190834208	0.18226555985800003	21.885587396	202.0	False	False	True	False	False
ENSG00000032444	0.00281938846785	0.0028193661980500002	0.00281936623683	0.00281937523116	0.059980440064900005	0.00281937285487	0.9259226909460001	1360088541050.0	7993942.825939999	0.145889001886	0.158581661881	0.573893473368	0.741279723952	Q8IY17-4	Q8IY17	PNPLA6	0.548239816355	0.0827560136157	0.12754164650699998	0.00226965778676	0.239192865735	3.9703952692	13.6582011298	0.145889275833			0.929189062865	ENSG00000032444	0.31972135988899997	0.298570716407	21.781123906999998	202.0	False	False	False	False	False
ENSG00000033011	0.0627948026831	0.0026024124611500003	0.00260241247512	0.0026024128830100003	0.00260241248247	0.00260241276935	0.924193134246	870233311787.0	6505794.647480001	0.143389549735	-0.0157664705112	0.506976744186	0.7107493811419999	Q9BT22	Q9BT22	ALG1	0.0008183647150650001	0.0146944266315	0.516753515752	0.0008183646994289999	0.46691532820200005	1.32463868227	4.30535381354	0.267325180711			0.8355924281370001	ENSG00000033011	0.20224183904100002	0.163025736014	22.230560529899996	202.0	False	False	False	False	False
ENSG00000033030	0.005542926260010001	0.0689314723022	0.00554292635996	0.00554293678375	0.0055429271491	0.00554293205602	0.9033538790889999	2376537181110.0	17383390.3231	0.08868247901180001	-0.822088106879	0.203075768942	0.842772485185	Q6NZY4	Q6NZY4	ZCCHC8	0.13889270456900002	0.0474130264387	0.450714254815	0.0444430626163	0.318536951562	0.504519619918	5.1387355363300005	0.13822377907800001			0.849848095349	ENSG00000033030	0.30926889790199996	0.31100756937	23.2298311494	202.0	True	False	False	False	False
ENSG00000033050	0.0016590408439200002	0.00165904080721	0.724638682281	0.00165904081423	0.0016590407952	0.00165904076125	0.267066113697	21809662069100.0	43283354.311000004	0.107895556285	0.037692699721699995	0.52895723931	0.931888080414	Q9UG63-2	Q9UG63	ABCF2	0.180476546255	0.192640969595	0.443097438206	0.0017038120681900002	0.182081233875	3.66336757499	14.9403901672	0.128108607139			0.935109449248	ENSG00000033050	0.229279403973	0.366746257059	23.8776278317	202.0	True	False	False	False	False
ENSG00000033178	0.0152326461699	0.00409261605516	0.00409261605612	0.00409261607929	0.0787376138304	0.021122912171099996	0.872628979638	35274633266100.0	59619615.5395	0.0996189781285	-0.062276788668900004	0.488897224306	0.950341309729	A0AVT1	A0AVT1	UBA6	0.233939868297	0.03928529819169999	0.111159785324	0.009367043507909999	0.606248004679	1.15075432191	8.737114232989999	0.122778774275			0.894698917192	ENSG00000033178	0.163324416572	0.158035912757	25.306619008000002	202.0	False	True	True	True	False
ENSG00000033627	0.00460151670837	0.026004043629200002	0.00460151670487	0.0046015166815	0.0357627446475	0.00460151669195	0.919827144937	1928682432970.0	13668862.2815	0.10160100282199999	-0.515265168686	0.313503375844	0.8121671292479999	Q93050-1	Q93050	ATP6V0A1	0.35661959538500004	0.316211016607	0.0407788826835	0.00155036405222	0.284840141273	0.597802732242	4.4176944550699995	0.17501822409			0.8379878476279999	ENSG00000033627	0.197719858477	0.152923535166	23.3250626952	202.0	False	False	False	False	False
ENSG00000033800	0.0030749907073000004	0.0030749907352500003	0.00572214573452	0.0030749907065300004	0.00307499546017	0.0030749916865300004	0.97890289497	279197405106.0	4269771.929959999	0.12375165365999999	-0.798129345229	0.211402850713	0.6469882229389999	O75925	O75925	PIAS1	0.143644030278	0.0011804339301400002	0.39472004622	0.00118043393246	0.459275055639	3.87997842306	10.681291549700001	0.1844127252			0.910590480642	ENSG00000033800	-0.006040749988580001	-0.00435972135299	22.0312896887	202.0	False	False	False	False	False
ENSG00000033867	0.014295229242399999	0.008732099073209999	0.0021132645081400002	0.00211327060229	0.256012278744	0.00211326358855	0.714620594242	8315542182110.0	18936839.4306	0.152278218985	0.7748852491329999	0.755213803451	0.853349336134	Q9Y6M7-13	Q9Y6M7	SLC4A7	0.167996598626	0.0006853687127	0.000685368711731	0.000685368711239	0.829947295238	19.6219837793	15.5692232242	0.284514569509			0.9381670172159999	ENSG00000033867	0.547324869592	0.310744839444	22.9178383319	202.0	False	True	True	True	True
ENSG00000034152	0.00128186675264	0.0012818667524000002	0.0012818667595899998	0.502066334169	0.0677948488408	0.00128186675482	0.42501134997	422697950577.0	4415701.51838	0.147236458157	-0.26186610054000004	0.413653413353	0.6535893781409999	P46734	P46734	MAP2K3	0.186412613706	0.00222200860035	0.38293567645900006	0.0022220085839199997	0.426207692651	1.3029080552399999	8.209340690189999	0.139042832107			0.888895380541	ENSG00000034152	0.299913955492	0.367912152236	20.8538402713	202.0	False	False	True	False	False
ENSG00000034693	0.0160065271617	0.0020114702492600002	0.00201147014517	0.0232114637572	0.00201147014028	0.00201147014611	0.9527361284	369610747600.0	4162745.9408199997	0.146046915659	-0.34473360761699995	0.38102025506399995	0.642937514065	P56589	P56589	PEX3	0.266225540971	0.0019656795499999997	0.0892979374777	0.0019656802439	0.640545161757	1.7545669473099998	7.779857421619999	0.170260276362			0.884416140843	ENSG00000034693	0.210962524915	0.321275680397	20.9595192901	202.0	False	False	True	False	False
ENSG00000034713	0.0012129639241400003	0.00121296530009	0.00121296413692	0.00121296412052	0.00121296450204	0.0208898891422	0.973045288874	4272995608330.0	11057364.6109	0.18694531797299999	1.135999587	0.827906976744	0.785087390293	P60520	P60520	GABARAPL2	0.176984356704	0.00386285996715	0.0038628599627900002	0.0038628599629099997	0.811427063403	3.38190056303	14.848784101600002	0.12384815018300001			0.934739425099	ENSG00000034713	0.203278224444	0.36906994617899996	21.8815793435	202.0	False	False	False	False	False
ENSG00000035141	0.0058640108183299995	0.0027796851643200004	0.00277968614329	0.0027796853230399998	0.36699251466	0.0202068942494	0.598597523641	6678903237070.0	20000312.9868	0.129215848497	0.322845284403	0.629407351838	0.859950491336	E7EQY1	E7EQY1	FAM136A	0.263753407998	0.00132646420239	0.396484539807	0.00132646420269	0.33710912379	23.0518423948	28.8882303812	0.166200330064			0.968917971489	ENSG00000035141	0.328648892381	0.36404529007299996	22.4443351753	202.0	False	False	True	True	True
ENSG00000035403	0.11151518122500001	0.000849947456298	0.0008499457534550001	0.000849945868127	0.412075481624	0.0008499457498669999	0.47300955232299996	2.80463129923e+16	812534627.93	0.206108550832	1.10623415668	0.822205551388	0.9988748030910001	P18206	P18206	VCL	0.41577466366099997	0.221267542914	0.000788263556654	0.032033195485299995	0.330136334383	930.7901399560001	140.888518804	0.21654605873799998			0.996027109138	ENSG00000035403	0.32898405024300004	0.318972887047	27.263488720500003	202.0	True	False	True	True	True
ENSG00000035499	0.0258384729164	0.00224424374637	0.00224424188158	0.0022442420299499995	0.022771057393	0.025920470541400002	0.918737271491	399630349828.0	4218574.73924	0.149852324409	-0.257775587946	0.415378844711	0.644887855375	Q8WUY9	Q8WUY9	DEPDC1B	0.17604069931699998	0.0022295720519299998	0.360605483521	0.0022280888377800004	0.458896156273	8.071265563010002	21.493445199299998	0.13217970673499999			0.9558697515000001	ENSG00000035499	0.27987876686200003	0.308302450051	20.5939620675	202.0	False	True	True	True	False
ENSG00000035681	0.0006509002983559999	0.000650900298232	0.608663235487	0.0006509002983309999	0.000650900831056	0.00141606681331	0.38731709597400005	445245495627.0	3048771.53443	0.218864279285	0.5441738518110001	0.696174043511	0.592378666267	Q92636	Q92636	NSMAF	0.566852541505	0.04400810521430001	0.00460806344482	0.00460806344187	0.379923226394	0.464985009269	5.74026146962	0.118792165937			0.8586313001479999	ENSG00000035681	0.191259131761	0.47285066797499997	20.2017303688	202.0	False	False	False	False	False
ENSG00000035687	0.0016937076079699999	0.0016937075878	0.0016937075666099998	0.00169370791225	0.234895355525	0.0016937075397699998	0.7566361062610001	55208451027500.0	46992174.2717	0.158116517842	1.18107600622	0.835108777194	0.936913959943	P30520	P30520	ADSS	0.42393617874399997	0.07248536053339999	0.00399921748753	0.00399921749053	0.49558002574500004	14.362315789	33.9457177151	0.111641905481			0.974663083275	ENSG00000035687	0.20743287815	0.28770864890299996	23.991488077399996	202.0	False	False	True	False	True
ENSG00000035928	0.00831198117775	0.00831198141137	0.00831198203483	0.042253737	0.00831198770122	0.00831198087796	0.916186349797	11330203122900.0	43913458.1053	0.0766515973399	-0.941378616718	0.166466616654	0.932863251069	P35251-2	P35251	RFC1	0.167758904751	0.00323583429268	0.5726995870539999	0.0031831340379200003	0.253122539864	4.59592201252	23.1110786992	0.09276114673530002			0.959492093168	ENSG00000035928	0.0879631453049	0.07321800095210002	25.0438087916	202.0	True	False	True	False	False
ENSG00000036054	0.0243084724811	0.060989388789300006	0.00147950367294	0.0014795036039499999	0.0014795036666	0.06090959521790001	0.8493540325679999	4818979584220.0	10751643.0472	0.204175066523	1.37049275825	0.864891222806	0.781186707674	Q9NUY8-2	Q9NUY8	TBC1D23	0.0318332218403	0.0765450217413	0.0177266051005	0.06846547297109999	0.8054296783470001	18.4236753651	8.27142420379	0.518928880803			0.889771753525	ENSG00000036054	0.7232449551610001	0.5406952127019999	21.6384537403	202.0	False	False	False	False	False
ENSG00000036257	0.0459291833636	0.00543200275928	0.0054320029577299995	0.179711379679	0.00543200281025	0.00543200275621	0.7526314256730001	20682859466100.0	56816681.8237	0.0800441180558	-0.704810777075	0.243135783946	0.9472657715100001	Q13618	Q13618	CUL3	0.278112649246	0.037521534971	0.38021833240599995	0.0903160066253	0.213831476752	1.61208136951	13.7526774964	0.0923222160891			0.929675936745	ENSG00000036257	0.022666507459299996	0.021132048630400004	25.679237470300002	202.0	True	False	True	False	False
ENSG00000036549	0.0008500359903210002	0.000850035978778	0.34880900885899996	0.000850036196528	0.110698578322	0.0008500360696980001	0.537092268583	296785497305.0	2726911.6551900003	0.19977919981699999	0.137911705041	0.567141785446	0.5731002925509999	Q8IYH5-2	Q8IYH5	ZZZ3	0.32946437049000005	0.230357921814	0.185491878365	0.0029096499057100003	0.25177617942499997	1.08081183375	9.20307963773	0.112964469046			0.8988470826520001	ENSG00000036549	0.00243220014988	0.00523858750993	21.3614851476	202.0	True	False	False	False	False
ENSG00000037474	0.0103413544993	0.0103413546739	0.010341463408700001	0.122068013928	0.0103413563423	0.0103413545935	0.8262251025540001	17602594089200.0	68900194.2461	0.060893072916099994	-1.46775761984	0.056039009752400004	0.9573925436949999	Q08J23	Q08J23	NSUN2	0.0341115981826	0.00110794501687	0.47902347466399997	0.0011079450168599999	0.48464903711900004	15.2610245229	23.2128802482	0.16829174521600002			0.959725792631	ENSG00000037474	0.238955965229	0.129222471861	25.423712581900002	202.0	False	True	True	True	False
ENSG00000037757	0.00106485220116	0.043809813628599995	0.00106485233336	0.00106485374078	0.40445192297399996	0.0010648574265099998	0.547478847696	2952884157240.0	8288779.79557	0.20731589590100002	1.20049409706	0.8379594898720001	0.7460055509710001	Q9BV20	Q9BV20	MRI1	0.561819404622	0.121738674336	0.0013399745333599997	0.0013399745345100001	0.313761971974	1.4997434591699998	5.63643017631	0.21727229758000002			0.857092778687	ENSG00000037757	0.47903030534100005	0.602168750208	21.318595938199998	202.0	False	True	True	True	True
ENSG00000037897	0.017427097703900003	0.00340276519591	0.0034027651962699997	0.00340276520702	0.204308180979	0.0169592311146	0.751097194603	854026669428.0	7826133.4465	0.118083296176	-0.466153521933	0.333308327082	0.7377541069689999	Q9UBP6	Q9UBP6	METTL1	0.01417061358	0.0005753173519639999	0.5907770941839999	0.000575317472602	0.393901657412	1.9750587576299998	5.060997009409999	0.277685964744			0.8487574978579999	ENSG00000037897	0.284816480138	0.17451293654	22.4170767594	202.0	False	False	False	False	True
ENSG00000038210	0.0006674409680830001	0.000667440968972	0.549147107661	0.000667440967853	0.126230779605	0.0387629851518	0.283856804678	1516305705520.0	5609076.25576	0.21953412625100002	1.1174728386	0.824981245311	0.6885454954620001	Q8TCG2	Q8TCG2	PI4K2B	0.293181614093	0.0231457044435	0.07190596024519999	0.0157199846826	0.596046736536	0.410537474706	5.1951001433999995	0.123333904224			0.850880267975	ENSG00000038210	-0.10801168686200001	-0.250249512108	23.075963863400002	202.0	False	False	False	False	False
ENSG00000038219	0.0101949659795	0.0391220197417	0.0101949661507	0.010194965890299999	0.0101949658971	0.0101949691889	0.909903147152	2861421189980.0	25186012.1786	0.06716321631130001	-1.50453268114	0.0503375843961	0.8852299152349999	Q8NFC6	Q8NFC6	BOD1L1	0.127815179947	0.000336820381232	0.8150402058059999	0.00033682038081299994	0.056470973484699996	2.7731405944200005	7.24161781957	0.229958963877			0.878398379684	ENSG00000038219	-0.0841167659226	-0.0261612538075	24.655554647600002	202.0	True	False	True	False	False
ENSG00000038274	0.019089779182500002	0.00321584167798	0.0032158416551799998	0.0032158416569499997	0.18469278074700002	0.0844517238058	0.702118191275	10378412284200.0	29485917.0193	0.109257389731	-0.0653979165268	0.487771942986	0.900157527567	Q9NZL9	Q9NZL9	MAT2B	0.243697501301	0.0013556061161700001	0.28111716766399997	0.0296347233837	0.44419500153499997	7.859879327010001	15.840990350999999	0.176980578251			0.939257614707	ENSG00000038274	0.215449572384	0.171058122196	24.108423620700002	202.0	False	False	False	False	False
ENSG00000038358	0.18141608910300003	0.005937324830079999	0.00593732469982	0.00593732466548	0.08007868131780001	0.005937324670310001	0.714755930713	14693028241100.0	43931581.5008	0.0872526887438	-0.567393128478	0.293623405851	0.933013277324	Q6P2E9	Q6P2E9	EDC4	0.345124603709	0.451340796901	0.0689477292791	0.00106000941668	0.133526860695	1.94442909436	8.043813404229999	0.17335408013700002			0.8872789592579999	ENSG00000038358	0.0925304836788	0.047533350165599994	25.2388293284	202.0	True	False	False	False	False
ENSG00000038382	0.0628413641839	0.00286741530852	0.00286741522022	0.255531941201	0.118591843956	0.010008099312799999	0.547291920817	1786161707680.0	10653361.0283	0.125450888738	-0.0416000958231	0.49759939985	0.779611432001	O75962	O75962	TRIO	0.418787821571	0.0318936360346	0.0023128628811199996	0.00231286288081	0.544692816632	0.7584233472930001	5.392467675009999	0.16149842694900002			0.853782036301	ENSG00000038382	0.0485856457883	0.03994996413830001	23.2210704798	202.0	False	False	False	False	False
ENSG00000038427	0.031272399742	0.043099169312300005	0.000848945143416	0.000848945144418	0.0178757918548	0.000848945707313	0.905205803096	2694239984610.0	6742689.92219	0.24343608245499998	1.5320744224899998	0.885671417854	0.7162253394339999	P13611	P13611	VCAN	0.272771000178	0.109191315435	0.000599294072593	0.00059929408465	0.616839096229	134.633119722	40.4353305621	0.286955766723			0.97939549739	ENSG00000038427	0.568513199093	0.48796445234999997	20.0324869807	202.0	False	False	False	False	False
ENSG00000038532	0.0988381783982	0.00240981935223	0.00240981904001	0.00240981927879	0.00240982006226	0.0024098195061	0.889112724362	2023735825900.0	10335730.3876	0.137637171141	0.20311487634300002	0.589347336834	0.7757107493809999	Q2KHT3	Q2KHT3	CLEC16A	0.505157294753	0.10085565484799999	0.0050315591203999996	0.005031559124100001	0.383923932155	0.08536541812010001	1.9121474019099998	0.15279868553200002			0.777459686843	ENSG00000038532	0.035587801709099996	0.059173044900400006	23.1618404385	202.0	False	False	False	False	False
ENSG00000039123	0.00480786467871	0.027580465088299998	0.00480786486489	0.00480786528928	0.0501742702348	0.00497378447134	0.9028478853730001	67226141927800.0	83875483.1112	0.097753892412	-0.116863877169	0.471267816954	0.966094066462	P42285	P42285	SKIV2L2	0.187965698267	0.031654367765799996	0.552136920149	0.00353256968826	0.22471044413000002	6.47447882956	29.837655457399997	0.08527813870999999			0.970300693308	ENSG00000039123	0.0516725341915	0.045862799302400004	26.1015158875	202.0	True	False	True	False	False
ENSG00000039319	0.043318910932	0.00237479656146	0.0023747959230500004	0.0023747959749899996	0.111485905914	0.0203263276267	0.817744467068	1060017982390.0	5788960.61089	0.17785088140799998	0.532144314839	0.691972993248	0.693121296227	Q7Z3T8	Q7Z3T8	ZFYVE16	0.16139360079700002	0.007358059048680001	0.0548726975463	0.00207956547558	0.7742960771330001	0.701841615951	4.83208460839	0.173374422748			0.844979356547	ENSG00000039319	0.240086794485	0.211707847629	21.907854696999998	202.0	False	False	False	False	False
ENSG00000039560	0.0306396328081	0.0069318060073999994	0.006931808832949999	0.00693180603372	0.00693180638297	0.0952806817832	0.846352458152	6518146857460.0	30892207.7707	0.08264434147310001	-0.860614862061	0.19167291823	0.9043582626960001	Q9P0K7	Q9P0K7	RAI14	0.189738949378	0.0403606618315	0.24466573408599998	0.00207985658986	0.523154798114	9.09234374419	21.226766401400003	0.142054201271			0.95546077744	ENSG00000039560	0.237292494561	0.153191219379	24.1965460446	202.0	False	False	True	False	False
ENSG00000039650	0.00301041002048	0.0030104100303	0.0030104100273299996	0.00301041002122	0.203677468453	0.00301041002026	0.7812704814270001	1798469337240.0	11522913.0296	0.11638291614299999	-0.20492276397599998	0.433833458365	0.791088440477	Q96T60	Q96T60	PNKP	0.39100738407799995	0.0797551382008	0.0034345355207800006	0.0034345352530400003	0.522368406947	3.1099289949299997	14.139564112999999	0.124720894011			0.931837656773	ENSG00000039650	0.34602740385200004	0.364810491668	22.031239235100003	202.0	True	False	True	True	True
ENSG00000040275	0.00273508492626	0.0287964852646	0.0027350849263400004	0.0425669274431	0.16458657740399998	0.00273508492653	0.7558447551090001	716267813542.0	6505688.19791	0.13009016761199999	-0.296631586879	0.400675168792	0.7106743680140001	Q96EA4	Q96EA4	SPDL1	0.208561893334	0.11238475432299999	0.19067652513900002	0.011746129908200002	0.476630697296	3.63105541551	12.7853865368	0.149039908763			0.9240087247799998	ENSG00000040275	0.385022615384	0.409497761072	21.055060754	202.0	False	True	False	False	False
ENSG00000040341	0.00335277507982	0.00335277405809	0.00335277825488	0.00335277439568	0.0033527800878000004	0.00418524563735	0.9790508724860001	6634745696660.0	22523049.6966	0.114362843651	0.006415887730789999	0.514853713428	0.873902933013	E9PH62	E9PH62	STAU2	0.210278334799	0.00366367398511	0.40477996833700003	0.00366366972946	0.37761435314900005	0.996417906471	9.545217263380001	0.10457670254000001			0.901768325933	ENSG00000040341	0.17065187973700002	0.20109196731400003	23.7473847393	202.0	False	False	False	False	False
ENSG00000040633	0.00656770777153	0.0029719489897600004	0.00297194911532	0.00297195102227	0.00297194900412	0.0029719497031399996	0.978572544394	1042041964140.0	7957366.79425	0.128284216809	-0.215801722653	0.43008252063	0.740754632061	Q9BUL5	Q9BUL5	PHF23	0.166153700353	0.0014944418557299999	0.142951074643	0.017847376847999998	0.6715534062999999	12.9655489778	20.169125050999998	0.17852884544			0.9529485082179999	ENSG00000040633	0.361399750745	0.25007892145300004	21.810907266100003	202.0	False	False	False	False	False
ENSG00000040933	0.0025107102848699997	0.0462989327011	0.0025107102565999997	0.00251071029354	0.00251071028672	0.0025107102673800003	0.94114751591	527303462506.0	5249107.63875	0.138339064027	-0.267163870039	0.411327831958	0.6792438676770001	Q96PE3-3	Q96PE3	INPP4A	0.297884910766	0.325058801641	0.0026582695763899995	0.00265826957525	0.371739748441	0.41176046600999994	4.61753755795	0.138967065492			0.841220690192	ENSG00000040933	0.244427729074	0.307856514535	21.5374434828	202.0	False	False	False	False	False
ENSG00000041357	0.005837406287369999	0.005837402015859999	0.005837401862729999	0.0987258216358	0.020200102698	0.00892059343552	0.854641272065	17482256630400.0	51557980.0366	0.0810966382618	-0.7032418190649999	0.243660915229	0.942239891981	H0YL69	H0YL69	PSMA4	0.43006762372699997	0.10238668456399999	0.161733587033	0.0017521970538100001	0.304059907622	46.832315916700004	44.285824799	0.154528318829			0.981693542105	ENSG00000041357	0.0853193315168	0.057734803036599995	25.2875374283	202.0	True	False	True	False	False
ENSG00000041802	0.024120296332700002	0.005858944627220001	0.00585894464623	0.005858944652759999	0.00585894508386	0.013222874007999999	0.939221050649	3761740774630.0	21348574.2945	0.0908501304232	-0.672223111026	0.256939234809	0.8672267646840001	Q9H089	Q9H089	LSG1	0.297233585307	0.0682566821483	0.00339258353376	0.0290228637931	0.602094285217	3.8293902405300004	14.2486244304	0.13733836527			0.932402430474	ENSG00000041802	0.42098580787199996	0.315243395995	23.093648206399997	202.0	False	False	True	True	False
ENSG00000042088	0.0062466801604	0.13599192969	0.00537267233503	0.00537267234296	0.190301303609	0.029202536853	0.62751220501	941958823526.0	10591091.3456	0.0916379247607	-0.952173714118	0.162490622656	0.778936313855	Q9NUW8	Q9NUW8	TDP1	0.617555351363	0.258581725401	0.00225380450716	0.00225380450854	0.119355314221	2.2495825733099997	11.3918073239	0.131661360543			0.915420269533	ENSG00000042088	0.32707910416999997	0.328190465763	22.1357517446	202.0	True	True	True	True	False
ENSG00000042429	0.050711521719699997	0.018798493792900002	0.107252237565	0.00392394340042	0.00392392078739	0.0735812021926	0.7418086805419999	1061510644340.0	9917715.88968	0.103884442558	-0.640937413109	0.267666916729	0.7704598304699999	Q9NVC6	Q9NVC6	MED17	0.269342470773	0.029827997023200003	0.00569512810269	0.005695127780280001	0.689439276321	0.131065785121	3.00592762049	0.120438724548			0.8082106411159999	ENSG00000042429	0.116406374995	0.14709988393100001	22.9429771392	202.0	True	False	True	False	False
ENSG00000042445	0.0019313084368800001	0.00193130837733	0.00193130946233	0.0283044493971	0.0019313085163299999	0.0019313083687900001	0.962039007441	221809226129.0	2746535.4882900002	0.17147649122900002	-0.292143784544	0.402100525131	0.5742254894609999	Q6NUM9	Q6NUM9	RETSAT	0.39021447834600004	0.00145369015936	0.082610544039	0.00145369014773	0.524267597308	0.9105906107230001	4.3133569588	0.221231102469			0.8357287528239999	ENSG00000042445	0.21809988901900002	0.217876776681	20.8264786424	202.0	False	False	True	False	False
ENSG00000042493	0.0280731566312	0.006649000170220001	0.0008364753285319999	0.0008364766222280001	0.467710901558	0.0022484245994099997	0.493645565091	24106204776000.0	21661206.7963	0.226663594788	1.96973786	0.928357089272	0.8693271322480001	P40121	P40121	CAPG	0.5259078838319999	0.00493078222791	0.000698911625396	0.0006989115597210001	0.46776351075499994	19.6400043581	15.643275663299999	0.28329772793900004			0.938498091454	ENSG00000042493	0.512386638444	0.44942145545199996	22.5052219721	202.0	False	True	True	True	True
ENSG00000042753	0.00147347764901	0.00147347767693	0.0635607447009	0.00147347766948	0.00147347769074	0.025208389917799997	0.9053369546950001	695881003512.0	4558103.05612	0.18301359429699998	0.400007178382	0.654613653413	0.658240192034	M0R0N4	M0R0N4	AP2S1	0.155170652573	0.00144816052404	0.515110456206	0.0014481605240099999	0.326822570172	45.8653706452	48.5604553942	0.13946322471300002			0.983602087715	ENSG00000042753	0.0251466728364	0.028083439347099996	21.961363495300002	202.0	False	False	True	False	False
ENSG00000043093	0.00476634311839	0.00476634312441	0.00476634311548	0.00476634314615	0.10080871436000001	0.0047663431211200005	0.875359570015	674173636739.0	8492476.04995	0.09668331929919999	-0.9798380808570001	0.15536384096	0.749906233591	Q96GG9	Q96GG9	DCUN1D1	0.438817270775	0.00298201489703	0.0029820147589599997	0.0029820147169499996	0.5522366848520001	1.00202300374	7.128981315760001	0.14041430977			0.877035132819	ENSG00000043093	0.0584368085201	0.0555534358804	22.8292309805	202.0	False	False	False	False	False
ENSG00000043355	0.00138680560879	0.06292644901490001	0.0013868054255	0.223554004276	0.00138692417685	0.00138680543768	0.707972206061	1398758289720.0	7268433.18058	0.162716102972	0.41428758045100006	0.659114778695	0.727702347911	O95409	O95409	ZIC2	0.317382553922	0.07610352457339999	0.119057612239	0.0189453837964	0.46851092546800005	885.411234033	104.253571209	0.285418141114			0.9937874892890001	ENSG00000043355	0.588880993158	0.350519165106	20.4503053208	202.0	False	False	False	False	False
ENSG00000043514	0.0012074862075799999	0.00120748620699	0.48235917331600003	0.0012074862075799999	0.133496678725	0.0012074862070699998	0.37931420313	582186135794.0	4797915.49959	0.159029734726	0.0489635293615	0.533008252063	0.666266596654	Q9H3H1	Q9H3H1	TRIT1	0.451869280752	0.00210244460562	0.09807266924180001	0.00210244460562	0.445853160795	2.7738037640099997	11.1010168449	0.15002896213			0.913745423386	ENSG00000043514	0.26602835461	0.352856149304	20.9317283176	202.0	False	False	True	True	False
ENSG00000044090	0.0016506267818699998	0.018557547000900003	0.0767036701766	0.25239700022100003	0.15905699277899998	0.0282587100818	0.463375452959	294370615561.0	3848986.5361	0.140961605027	-0.510967404902	0.315528882221	0.629885229915	Q14999	Q14999	CUL7	0.18800042094	0.123846088739	0.16653248177899999	0.000534748068914	0.521086260474	6.99986089685	9.373154038080001	0.28226624806999995			0.9003271792470001	ENSG00000044090	0.26685743781599996	0.193527336504	21.2196541783	202.0	True	False	True	False	False
ENSG00000044115	0.00813267146489	0.00813267221605	0.008132671902799999	0.00813267165305	0.32614056611	0.00813267146093	0.633196075193	87343604840800.0	129162444.59	0.07235679136369999	-1.0779232460700001	0.129257314329	0.9804215737749999	P35221	P35221	CTNNA1	0.552193701883	0.04932480542809999	0.0343845850731	0.0178754116953	0.34622149592100004	53.148885163900005	66.465587393	0.109685755879			0.9886655760690001	ENSG00000044115	0.124933260299	0.108976784458	26.277286503200003	202.0	True	False	True	False	True
ENSG00000044446	0.165780460384	0.0027945747442399997	0.0027945747416500003	0.00279457547601	0.00279457484561	0.00279457516739	0.820246664641	752306681841.0	7034701.882689999	0.123296787727	-0.40514368215499996	0.356189047262	0.7226764683820001	P46019	P46019	PHKA2	0.156663436871	0.025034319024999998	0.00151894101731	0.198939858957	0.617843444129	1.40026756609	5.17790398227	0.228534368845			0.8506076186020001	ENSG00000044446	0.527753176702	0.40538305938600006	21.668811940300003	202.0	False	False	False	False	False
ENSG00000044459	0.00304102314896	0.00304102318007	0.014768083144399998	0.0030410268099199996	0.00304102736829	0.0030410231657199997	0.9700267931829999	451372699729.0	5707496.4009300005	0.11771234127	-0.668231781792	0.258139534884	0.691020928663	Q9NXG0-2	Q9NXG0	CNTLN	0.119333509957	0.09023259690860001	0.583370801736	0.025597960006200002	0.181465131392	0.299271902545	3.09842472218	0.17655987922400002			0.810664485472	ENSG00000044459	0.109682806402	0.121884580918	22.1835893011	202.0	False	False	True	False	False
ENSG00000044574	0.022344362877500003	0.00484222668869	0.0048422266645699995	0.00484223247451	0.18151900211199998	0.00686937242081	0.774740576762	2465708255700000.0	496517367.269	0.100008381926	-0.714390845011	0.23983495874000002	0.997674593054	P11021	P11021	HSPA5	0.11223767214500001	0.0445943824627	0.13559011846400001	0.00103553978476	0.7065422871439999	902.71032462	141.540775005	0.212271962751			0.996124483914	ENSG00000044574	0.236356992902	0.124420107045	27.9883245048	202.0	True	False	False	False	False
ENSG00000046604	0.00328465471152	0.12967246747000002	0.0032846554053400003	0.0032846553275000002	0.109530932907	0.0032846546697100003	0.747657979509	14445547213500.0	33235824.4127	0.114356417919	0.09585465384189999	0.549587396849	0.9099092341159999	Q14126	Q14126	DSG2	0.27031279488800003	0.27667177728	0.0017675801001600002	0.00176758010405	0.44948026762800003	87.495245904	61.926945480200004	0.151047161681			0.987458128846	ENSG00000046604	0.310221572795	0.304035062901	23.1452686514	202.0	False	False	True	False	False
ENSG00000046647	0.0544729706565	0.00047127605004700004	0.005285591771100001	0.383411908615	0.00047127604577499997	0.00047127602253900004	0.5554157008389999	972263076492.0	4171655.8525400003	0.236365138621	1.0464649132500001	0.810502625656	0.643312579701	Q9NWZ8	Q9NWZ8	GEMIN8	0.306285648686	0.0082999724693	0.000539779361131	0.528074672788	0.156799926696	7.086132880189999	8.643639328439999	0.307969713598			0.893705694477	ENSG00000046647	0.280843586405	0.301151784175	20.9615535208	202.0	True	False	False	False	False
ENSG00000046651	0.0545952535891	0.0022056792962600004	0.00220563802983	0.00220563841748	0.431102426729	0.0184786896033	0.489206674335	567116515734.0	5308553.8228	0.141859989244	-0.185128172302	0.441560390098	0.6804440777140001	O75665	O75665	OFD1	0.361784593654	0.0332060373785	0.000576618267595	0.361474868626	0.24295788207400001	5.7192342285099995	7.691798900319999	0.310914531396			0.8836176676790001	ENSG00000046651	0.306487086675	0.21010906394	21.683987295599998	202.0	True	False	False	False	True
ENSG00000046653	0.19303482322999999	0.0008615267154260002	0.0061477464339700005	0.0008615267787939998	0.365076449854	0.0350112176347	0.399006709353	1606548136300.0	5651265.99212	0.22428546118599998	1.18463124433	0.8355588897220001	0.689820718626	B7Z613	B7Z613	GPM6B	0.22807678432599998	0.00273622741568	0.00048347551534800003	0.34272698747900004	0.425976525264	95.6069546734	29.8611224694	0.327445188931			0.9703785931290001	ENSG00000046653	0.565806913293	0.470003906676	20.1237631415	202.0	False	False	False	False	True
ENSG00000046889	0.0922533390769	0.0007608696005180001	0.0007608650329769999	0.074756072671	0.013723653875899999	0.0007608650881260001	0.816984334655	101902892868.0	1370350.92436	0.232949326677	-0.16238186131100002	0.451462865716	0.437476558398	Q70Z35	Q70Z35	PREX2	0.322495773331	0.0013758040612100002	0.00137580406058	0.0379385771196	0.636814041427	1.3186015989700002	5.3787815778	0.213487715666			0.8534509620630001	ENSG00000046889	0.247202322717	0.302268221569	19.552617562200002	202.0	False	False	True	False	False
ENSG00000047056	0.00426647041485	0.00874454971051	0.00426647040775	0.00426647076456	0.23145714973700002	0.00426647040767	0.742732418558	215190693204.0	4231500.16809	0.10962696219799999	-1.1566560396899999	0.110652663166	0.645337934138	Q9Y2I8	Q9Y2I8	WDR37	0.320398130103	0.12927683323699998	0.00480457380955	0.00480457438304	0.540715888468	0.187633974817	3.63468835498	0.119175932778			0.8222131339100001	ENSG00000047056	0.296618055576	0.405638223513	21.0938298651	202.0	False	False	True	False	True
ENSG00000047188	0.00398376319664	0.00398376489706	0.00398376311839	0.00398376310535	0.23062850069600002	0.0039837635122199995	0.749452681474	4753929737800.0	20397270.0817	0.106894247138	-0.217696893063	0.429557389347	0.8622008851549999	Q9H6S0	Q9H6S0	YTHDC2	0.45156635037299997	0.0398993520106	0.162692488567	0.00198424076088	0.343857568289	0.728961297239	5.20117235119	0.164153818733			0.850958167796	ENSG00000047188	0.5236370221600001	0.417450311214	23.1585808755	202.0	False	True	True	True	True
ENSG00000047230	0.598939171303	0.000476096225369	0.0279265359754	0.000476204932023	0.0349540502058	0.000476096216999	0.336751845141	59350310181300.0	31912788.056999996	0.241405271028	2.24050445311	0.946061515379	0.906533643388	Q9NRF8	Q9NRF8	CTPS2	0.131480105508	0.0235214231786	0.00033279023428599996	0.753468283435	0.09119739764410001	38.7665622776	19.6542682882	0.31679021979899996			0.951741060996	ENSG00000047230	0.7381010931919999	0.62347026456	22.225420146799998	202.0	False	False	False	False	False
ENSG00000047249	0.00903017845383	0.00903017349359	0.00903017318641	0.17684243540999997	0.021292349720799998	0.00903017328313	0.765744516453	1370363036500.0	17785277.2003	0.065819894125	-1.6724572746200002	0.0322580645161	0.844947865877	Q9UI12-2	Q9UI12	ATP6V1H	0.218743778809	0.00178330803767	0.280824911585	0.00178320285757	0.49686479871000006	2.06611244435	8.22722725092	0.174712300908			0.889090130093	ENSG00000047249	0.265513676629	0.16785593569200002	23.5518565931	202.0	False	False	False	False	False
ENSG00000047315	0.0112596565212	0.0112596565332	0.0112596565189	0.011259663379	0.0112596566567	0.011259656513200001	0.9324420538779999	14332324636100.0	59684924.6065	0.0634298477137	-1.36461892188	0.0698424606152	0.9504163228560001	C9J2Y9	C9J2Y9	POLR2B	0.431796453617	0.206628849424	0.0038437684495900002	0.00384376810558	0.35388716040299995	11.927570082899999	32.9734698308	0.104739702914			0.973961984887	ENSG00000047315	-0.008422138801580001	-0.00623840567276	25.8530554681	202.0	False	False	True	False	False
ENSG00000047410	0.00584382404401	0.005843824187209999	0.00584382405228	0.0058438240413699995	0.005843824164239999	0.00584382460833	0.964937054903	419908428494000.0	232796317.26	0.088024018315	-0.7026022176019999	0.243885971493	0.9911484509790001	P12270	P12270	TPR	0.35111866469999997	0.00269157120534	0.16256751721899998	0.0026915711954600004	0.48093067568000003	8.55924251543	22.9628290545	0.127406701779			0.959180493885	ENSG00000047410	0.17653734772	0.12404215773600001	27.2299657034	202.0	True	False	False	False	False
ENSG00000047644	0.000494674097271	0.0445161761371	0.2548824609	0.15862499666899998	0.000494674097343	0.0496227825887	0.4913642355100001	376651377759.0	2260134.7077900004	0.271541026611	0.7561044594249999	0.7511627906980001	0.538519240867	Q9ULE0	Q9ULE0	WWC3	0.27280484525800003	0.002605958098	0.0026059582503600003	0.0251205245064	0.6968627138879999	2.0769457374	8.51027400158	0.16934369514800002			0.8922061229260001	ENSG00000047644	0.103795396592	0.196079510449	20.4482658283	202.0	False	False	False	False	False
ENSG00000047849	0.006318218746739999	0.0354661602828	0.006318218462850001	0.0063182189894600005	0.128028334614	0.006318218405520001	0.811232630499	387396146331000.0	231117465.66599998	0.08516180966970001	-0.795051853723	0.212603150788	0.991073437852	E7EVA0	E7EVA0	MAP4	0.31101882721900004	0.266802621683	0.10710323990800001	0.0013878617518699999	0.313687449439	19.4080382476	27.1013438136	0.162554873292			0.96623042767	ENSG00000047849	0.323278491477	0.23659278131900002	26.638452606999998	202.0	False	False	False	False	False
ENSG00000047932	0.00224781295074	0.00224781365456	0.0022478129457600003	0.00224781293138	0.239900581714	0.0425747527001	0.7085334131029999	2024625520630.0	9859570.61303	0.144315956363	0.302924341941	0.6234808702179999	0.7694096466879999	Q9HD26-2	Q9HD26	GOPC	0.20386955133200002	0.00214200094901	0.18504351104400002	0.00214200061784	0.606802936057	1.3649526155399998	9.08856801805	0.128547408501			0.897775960115	ENSG00000047932	0.515171931803	0.553874406554	21.372179431	202.0	False	False	False	False	True
ENSG00000048028	0.00311238860193	0.0658835447539	0.00311238860193	0.0101294814816	0.17384115150899998	0.017638916979700003	0.726282128072	9025374040400.0	24675765.0428	0.12174804002900001	0.207169116077	0.590772693173	0.883129547671	Q96RU2-2	Q96RU2	USP28	0.265253409215	0.0886615540973	0.0010904370540599998	0.00109043704554	0.643904162588	42.837413164699996	29.1121489668	0.22482124768300002			0.9692685206820001	ENSG00000048028	0.625252692084	0.402136749231	22.5786000321	202.0	False	False	False	False	False
ENSG00000048162	0.0014892575211699999	0.043113115641599996	0.110096914104	0.00148931808585	0.0014892823654000002	0.00148925770426	0.840832854577	5806312580790.0	15053993.183	0.160065778449	0.8307550632940001	0.768492123031	0.8245442952519999	Q9Y3C1	Q9Y3C1	NOP16	0.08532034749360001	0.0154049651018	0.34710275154	0.000727109367217	0.551444826498	9.709533417100001	11.513582146	0.27063796331900003			0.916296642518	ENSG00000048162	0.30719525624899996	0.242223906998	22.942370709499997	202.0	False	False	False	False	False
ENSG00000048392	0.00101156396047	0.047874023667099995	0.00101156395782	0.24762376293299998	0.00101156418516	0.00101156403522	0.700455957261	6142479212090.0	12598913.9696	0.196715570758	1.3558618228900001	0.863465866467	0.802340409572	Q7LG56	Q7LG56	RRM2B	0.269406056077	0.0006478141742619999	0.000647814198885	0.0006478141747150001	0.728650501375	45.6056625233	22.575121854699997	0.299143300779			0.9582846459450001	ENSG00000048392	0.39531337244000003	0.290215942199	22.2428030877	202.0	False	False	False	False	False
ENSG00000048544	0.0010859381448	0.00108593813288	0.00108593812652	0.00108599352595	0.0207583753279	0.00108593812626	0.9738118786159999	2436855157700.0	8410974.8415	0.185595962482	0.893567009676	0.7809452363089999	0.748706023554	P82664	P82664	MRPS10	0.52599615193	0.00263995204133	0.0026399524023400004	0.0026399522297800002	0.466083991396	12.562132091199999	24.855446921	0.14259690562000002			0.962569136091	ENSG00000048544	0.104583157522	0.14053955122700001	22.3028580894	202.0	True	False	True	False	False
ENSG00000048649	0.00452595749696	0.00452595749656	0.00452595749653	0.00452595749729	0.004525957496609999	0.00452595749737	0.9728442550190001	14788773711300.0	35407740.5149	0.10860951340700001	-0.0325220818963	0.501050262566	0.915985297427	Q96T23	Q96T23	RSF1	0.11836310792000002	0.024737377512	0.761992184005	0.000646668815428	0.0942606617482	3.02018149275	9.85308226631	0.176377999352			0.904475344707	ENSG00000048649	0.08699348108830002	0.0455914883573	24.9137015631	202.0	True	False	False	False	False
ENSG00000048707	0.051505939781300004	0.00245125072121	0.0471701463101	0.00245127929923	0.0024512614034699997	0.0024512488589499997	0.891518873626	1947342058760.0	9829398.11199	0.141969220122	0.253194071003	0.6042760690169999	0.769184607306	Q5THJ4-2	Q5THJ4	VPS13D	0.5384077667880001	0.0931328274387	0.0365762658775	0.00120529686124	0.33067784303500003	0.679498838444	3.6391604743699997	0.22651301065			0.822329983641	ENSG00000048707	0.055924507265	0.052548934453400004	23.101590111	202.0	False	False	False	False	False
ENSG00000048740	0.0023212653243000004	0.06324361465940001	0.0023212655729299998	0.00232126539677	0.0023212655396100002	0.00232126627998	0.925150057227	978247159951.0	6839706.54257	0.144606171823	0.0379993363814	0.529182295574	0.7179506413619999	E9PC62	E9PC62	CELF2	0.13790767608899998	0.0652785303375	0.130375016095	0.0154097675369	0.651029009942	1.8544353402	5.83320214982	0.233452656585			0.859897172237	ENSG00000048740	0.24673290487500002	0.18725108671100002	22.1828715362	202.0	False	False	False	False	False
ENSG00000048828	0.0043643802492399995	0.00436438023625	0.00436438023617	0.045188631837	0.004364380292100001	0.0043643803024799996	0.932989466847	4310624763980.0	19999430.9082	0.103813174604	-0.308755163577	0.39609902475599995	0.8598754782089999	Q9NZB2-6	Q9NZB2	FAM120A	0.21586359318599999	0.0030988409338099997	0.0030988409906700003	0.00309884124189	0.774839883648	3.85523526181	14.321547557999999	0.137099380784			0.9327724546230001	ENSG00000048828	0.36846511262299997	0.32820292453899996	22.9745356444	202.0	False	False	True	False	False
ENSG00000048991	0.06130789792000001	0.0011044349134400001	0.15881022941099998	0.00110443526753	0.060186323861100004	0.024376158933799998	0.693110519693	309539209922.0	2998270.91543	0.185561110515	0.049085644132699995	0.533158289572	0.589378141175	Q15032	Q15032	R3HDM1	0.225067782429	0.00354967134958	0.241635614248	0.00955064045983	0.520196291514	2.13775004276	12.951889265899998	0.112887365852			0.925001947496	ENSG00000048991	0.00417830892145	0.00762820441936	21.4501613504	202.0	False	False	False	False	False
ENSG00000049239	0.014069629539299999	0.00044962650896199994	0.00250380861881	0.00044962653805400007	0.014516730165600001	0.00044962650981300004	0.967560952119	647980387706.0	1827846.0694900001	0.44039391689499996	1.9564232736400002	0.927306826707	0.499137349036	R4GMU1	R4GMU1	H6PD	0.11920855828600001	0.0278188637443	0.5410182663149999	0.028984597959599998	0.282969713696	1.8095948611300001	4.64934001867	0.28933393174100003			0.8418828386689999	ENSG00000049239	0.296241174755	0.349353469517	19.931307946500002	202.0	False	False	True	False	False
ENSG00000049245	0.0008384569818010001	0.0173410155189	0.0008384571045939999	0.0144560692701	0.00083845723191	0.0008384570064369999	0.964849086886	650616076773.0	3517446.5305800005	0.229316281547	0.823423868726	0.766616654164	0.616457880129	Q15836	Q15836	VAMP3	0.61216402837	0.11214466474000001	0.0031726479300599997	0.0031726494489899997	0.26934600951	5.85782535462	20.9720280047	0.115405838496			0.954857053829	ENSG00000049245	-0.040690036491199996	-0.08900858592250001	22.1285386868	202.0	True	False	True	False	False
ENSG00000049283	0.002066580466	0.023874959763599997	0.00196183461778	0.00196183461933	0.0019618347818199998	0.0326642457718	0.9355087099799999	36718525823.7	1256945.46037	0.15244956329	-1.4447903672	0.0587396849212	0.418498237192	Q9H201	Q9H201	EPN3	0.58894887353	0.0384104571599	0.0137061178042	0.00182783342298	0.35710671808300004	0.141261166128	1.27112991253	0.295679663153			0.750428449015	ENSG00000049283	0.089800679375	0.107148501823	20.1009282168	202.0	False	False	False	False	False
ENSG00000049449	0.00352151731206	0.00356721771429	0.0035215173123400003	0.0035215174255799997	0.184961689217	0.172199009266	0.628707531753	55169151966200.0	65733003.7419	0.11299641782	0.314436436818	0.62655663916	0.9553671892579999	Q15293	Q15293	RCN1	0.134527386526	0.00285914587196	0.38521681408	0.0028591458594099998	0.474537507662	10.595776834199999	28.7821190842	0.113095060081			0.9688400716680001	ENSG00000049449	0.35370473314999995	0.382602870303	24.0907685904	202.0	False	True	True	True	False
ENSG00000049541	0.00843717242178	0.008437172431590001	0.00843717242109	0.00843717242112	0.199631926211	0.00843717242171	0.758182211672	8548263830140.0	40623115.8679	0.0719723572927	-1.16163862112	0.109077269317	0.9269372140119999	P35250	P35250	RFC2	0.21783791328699997	0.0014450528063199998	0.552807084819	0.0014450528529600002	0.22646489623500002	17.6211396289	31.4223084285	0.133591525486			0.972092389188	ENSG00000049541	0.0636053132049	0.047519677620400005	25.031779055700003	202.0	True	False	False	False	False
ENSG00000049618	0.041334534181	0.0047236542002	0.00472365421645	0.00472365435976	0.0539053067004	0.00472365440037	0.885865541942	2504850368410.0	15643023.0717	0.101174299926	-0.48002947208400004	0.327981995499	0.828820043508	Q8NFD5-3	Q8NFD5	ARID1B	0.126578235297	0.106737744815	0.47688119046099997	0.00100222065539	0.288800608771	1.8657201491799997	7.805172743019999	0.17500108110999998			0.8846693152609999	ENSG00000049618	0.159768925338	0.10361441943199999	23.5712369669	202.0	True	False	False	False	False
ENSG00000049656	0.0012372033095499999	0.00123720324735	0.0012372032495399999	0.34082420040600003	0.00123720325908	0.0035155600920100004	0.650711426436	500104617635.0	4267915.520819999	0.16569698948	0.043634342910699994	0.531057764441	0.64668817043	Q96KA5-2	Q96KA5	CLPTM1L	0.095406366129	0.00218761137465	0.382144897539	0.0021876113820100004	0.5180735135760001	2.91829243949	12.772580396099999	0.13374752680500002			0.9238918750489999	ENSG00000049656	-0.042522432877099996	-0.056800768259199996	22.218578973200003	202.0	False	False	False	False	False
ENSG00000049759	0.0295179351848	0.016585907666200002	0.00393404995117	0.00393405004929	0.00393405117547	0.00393404982528	0.9381599561480001	2959267994520.0	16077680.8915	0.10699629611400001	-0.309540921855	0.395798949737	0.832645713	Q96PU5	Q96PU5	NEDD4L	0.26760864151299996	0.0976461203603	0.35525623020999997	0.00154976863533	0.277939239282	1.68102939377	8.06649989161	0.160732063914			0.88747370881	ENSG00000049759	0.396560492886	0.30466683368299996	22.9805574252	202.0	False	False	False	False	False
ENSG00000049860	0.245189009623	0.00158403117288	0.0015840309455400002	0.00158403212052	0.00158403095426	0.0017540869787800002	0.746720778205	29334050350300.0	36941930.0923	0.146610958961	0.848725110843	0.772543135784	0.919810966919	P07686	P07686	HEXB	0.221305972331	0.0019503611705899999	0.026907116975	0.07828386079210001	0.671552688732	6.56843030934	15.539953457200001	0.1649229462			0.9380112175740001	ENSG00000049860	0.25373719654300003	0.23743404852699998	24.1682262999	202.0	True	False	True	True	False
ENSG00000049883	0.00358005283414	0.0161522051977	0.00358005280358	0.00358005291378	0.0035800534990799997	0.0266632951034	0.942864287648	167780944214.0	3703562.841	0.110599101558	-1.23966244139	0.0924981245311	0.6244842847500001	Q8WV60	Q8WV60	PTCD2	0.427499803839	0.036902648953900004	0.00283796667065	0.0028379665214000004	0.529921614015	0.322425410671	3.7555050045	0.15119808330999998			0.8248033029520001	ENSG00000049883	-0.0101866780655	-0.010933075667299999	21.8410046831	202.0	False	False	False	False	False
ENSG00000050327	0.00183386032698	0.12290546654100001	0.0132675384726	0.0018338603073499997	0.152314491709	0.0018338603776500001	0.706010922266	166616621998.0	2608184.61533	0.15650233941	-0.63508658287	0.26939234808699997	0.5658990323309999	Q12774	Q12774	ARHGEF5	0.752605051116	0.0643637648281	0.00047120928063199995	0.000471209079231	0.18208876569600002	2.5077259108099996	4.08597407995	0.38756488954			0.8314053127680001	ENSG00000050327	0.374074595321	0.237486783717	20.7618251458	202.0	False	False	True	False	False
ENSG00000050393	0.029210157992700003	0.000971724823915	0.34682221071099995	0.000971741565516	0.000990339767187	0.023646012076699998	0.597387813063	44912180415.8	1105683.7227	0.19166868081099997	-0.847568699731	0.195273818455	0.389468156927	Q96AQ8	Q96AQ8	MCUR1	0.47611542009900004	0.00494272109388	0.0049427210924099995	0.0049427211011099995	0.509056416614	0.9638071603689999	9.07599331314	0.108168524835			0.8976396354289999	ENSG00000050393	0.060519296441699996	0.129274314988	19.6396218807	202.0	False	False	True	False	False
ENSG00000050405	0.00532360289563	0.005323614387020001	0.00532360584764	0.0503829384249	0.005323622677569999	0.081372160992	0.8469504547750001	6504513449590.0	26496006.4231	0.0962558176791	-0.454432304809	0.33735933983499994	0.8898057159999999	Q9UHB6	Q9UHB6	LIMA1	0.385039243009	0.009713495373209998	0.00175717578355	0.0017571751180599999	0.601732910716	6.025297330549999	13.3598027301	0.183733858715			0.927514216717	ENSG00000050405	0.303357082616	0.17620857953400001	23.969572066199998	202.0	False	False	False	False	False
ENSG00000050748	0.0824100432611	0.00184597819149	0.00184597817272	0.218487960215	0.00184597827761	0.00778059071442	0.685783471168	408662528685.0	4938297.58349	0.129450923153	-0.515727971023	0.313353338335	0.670692371165	P45984-2	P45984	MAPK9	0.553208569796	0.00501025537192	0.115124631469	0.00501025537128	0.321646287991	0.578888959675	7.26685614357	0.10470105809000001			0.8787489288770001	ENSG00000050748	-0.0130633589668	-0.022753918054400003	22.295621725100002	202.0	False	False	True	False	False
ENSG00000050820	0.0164734776441	0.00136500663554	0.00136500588457	0.22293251372900003	0.00136500834604	0.0013650058978900003	0.755133981863	2301692287970.0	9181105.21142	0.16524512922	0.635074244961	0.7188297074269999	0.760033005776	P56945	P56945	BCAR1	0.11917019428200001	0.0069970415662	0.22787633695	0.0152355388151	0.630720888388	7.775381008639999	11.3105375869	0.246534437247			0.914894445743	ENSG00000050820	0.5283951905259999	0.405049695441	21.6221635044	202.0	True	False	True	False	False
ENSG00000051128	0.0102152541312	0.223326525632	0.0010738356416300002	0.0010738358614100002	0.0128349417456	0.00107383602065	0.750401770968	702946081513.0	4348440.01831	0.192809098176	0.49996427737800003	0.681770442611	0.650438826795	Q9NSC5-2	Q9NSC5	HOMER3	0.402467123711	0.15018740471699998	0.0598473587371	0.0010513641910099999	0.38644674864399997	1.6424238426700002	5.594721676390001	0.22906784712099998			0.8563527303890001	ENSG00000051128	0.508712076863	0.634672450752	20.2719630733	202.0	False	True	True	True	False
ENSG00000051180	0.00326188263592	0.0498759127515	0.0032618826381599995	0.0032618826447199994	0.115179886982	0.0032618826352399993	0.821896669712	311121677146.0	4927809.14759	0.113190833057	-0.905121386576	0.17831957989500002	0.670167279274	Q06609	Q06609	RAD51	0.24201959318000005	0.115192562929	0.290540576126	0.00178014330317	0.350467124463	2.8197610385500003	11.3323081511	0.148179381353			0.9150307704289999	ENSG00000051180	0.342625736349	0.348125327937	20.930448559600002	202.0	True	False	False	False	False
ENSG00000051382	0.130886688348	0.0028802535947299998	0.0028802537371300004	0.00288025365084	0.132104906165	0.0261038929261	0.702263751579	128013322619.0	2933739.9358599996	0.121956786444	-1.18710538973	0.10367591898	0.585477458555	P42338	P42338	PIK3CB	0.416688414627	0.00115841669311	0.111373193297	0.00115841586956	0.469621559514	4.5984482592400004	10.7597107989	0.19929896974800002			0.911272104074	ENSG00000051382	0.184839589712	0.187039296866	20.8094969833	202.0	False	False	False	False	False
ENSG00000051596	0.00298384940427	0.036467772080300005	0.00298384545392	0.00298384645901	0.31584697192600003	0.025311041243699997	0.6134226734329999	11188378197900.0	25669974.23	0.13030411665799999	0.41212390626400003	0.658364591148	0.8870302302899999	Q96J01	Q96J01	THOC3	0.839900379074	0.0014792029971400001	0.00147920558961	0.00147920297338	0.155662009366	13.8498523227	18.8590415174	0.19733447052099998			0.9492482667290001	ENSG00000051596	0.183303936448	0.0741880506464	24.291404283000002	202.0	True	False	False	False	True
ENSG00000051620	0.00134008479625	0.0035122753084200005	0.00134008478699	0.0013400848101600001	0.464413698648	0.00134008478903	0.526713686861	3924533177890.0	11862475.1836	0.167000851524	0.853709615195	0.77359339835	0.794914109969	Q9Y5Z4	Q9Y5Z4	HEBP2	0.39286462208800005	0.124268185814	0.0023487196884	0.0134400666439	0.467078405766	0.9156947547130001	4.46919936341	0.214114281076			0.838727895926	ENSG00000051620	0.229326539804	0.3545558069	22.602081262600002	202.0	False	False	True	True	True
ENSG00000052126	0.00672577601411	0.0394322686846	0.00672577598807	0.00672577616702	0.006725776044779999	0.0067257760659700004	0.926938851035	4365949651470.0	24834788.4624	0.0841354256907	-0.857692595245	0.19234808702199999	0.8837296526890001	Q9HAU0-6	Q9HAU0	PLEKHA5	0.254850401757	0.00704187527385	0.007041875321619999	0.00704187517048	0.724023972477	0.639203736681	8.74062346236	0.0914696970963			0.894757342058	ENSG00000052126	0.406524923272	0.393442834466	23.2852958042	202.0	False	False	False	False	False
ENSG00000052344	0.00146334448783	0.0014633444757699999	0.0014633444739300002	0.00146334664772	0.0014633445423900002	0.00146334447766	0.9912199308949999	242514782717.0	2533423.39043	0.19438436595199998	-0.054311637026000004	0.49287321830499997	0.559747955892	Q16651	Q16651	PRSS8	0.271128314078	0.0312528117367	0.17105726016199999	0.00112439575298	0.52543721827	49.720118701000004	38.105321694299995	0.18504631712900002			0.9781101503470001	ENSG00000052344	0.318378831147	0.323222634152	19.5132031898	202.0	False	False	True	False	False
ENSG00000052749	0.00507345804444	0.0050734576336000006	0.0050734577648	0.00507345804998	0.00507345802405	0.012708958739100001	0.961923751744	45426288616400.0	68547539.9334	0.0983245018303	-0.0852076103552	0.480720180045	0.957017478059	Q5JTH9	Q5JTH9	RRP12	0.138397680896	0.013908293884600001	0.338261031798	0.0012121372829200002	0.5082208561379999	2.93732879637	8.856003249939999	0.19352564083			0.895770039729	ENSG00000052749	0.316147489534	0.167485713507	25.4727383127	202.0	False	False	False	False	False
ENSG00000052802	0.00035902683370599994	0.0123476510711	0.000359026842291	0.535306078191	0.000359026831818	0.00462907980163	0.44664011042900004	4133466277640.0	8501754.75148	0.23913801864599998	1.63411183543	0.896774193548	0.750056259845	Q15800	Q15800	MSMO1	0.00858053961751	0.00345780817224	0.0134123286222	0.189662048418	0.78488727517	226.99447108799998	62.1092571592	0.242577940519			0.987497078757	ENSG00000052802	0.069381435474	0.07624610038110001	22.4958102167	202.0	False	False	False	False	False
ENSG00000052841	0.0032336378841500003	0.0032336375098100003	0.0032336374535700003	0.0595132962749	0.00323369989826	0.0032336437445399996	0.924318447235	305559261730.0	4754025.2188	0.116274972324	-0.8640285033030001	0.19024756189	0.665141399745	Q96AE7	Q96AE7	TTC17	0.19496730361099998	0.00199478320797	0.0019947832265999996	0.00199478320747	0.7990483467470001	1.9113507686400002	8.376980870299999	0.16503751436			0.890920775882	ENSG00000052841	0.008164172255199999	0.007819278832939999	22.1391266387	202.0	False	False	False	False	False
ENSG00000053254	0.00216202738024	0.00216202744454	0.0021620273935	0.0021620274534499997	0.0639818166673	0.0677289067621	0.8596411668989999	7858285742.32	585280.6974449999	0.15146061186899998	-1.90252418525	0.017179294823700002	0.234641062186	O00409-2	O00409	FOXN3	0.267286290121	0.0010950511503299998	0.42928039047300004	0.00109505115218	0.301243217103	14.7552363717	21.7068244059	0.176960685688			0.95639557529	ENSG00000053254	0.22077516191	0.187627698915	18.3030140843	202.0	False	False	False	False	False
ENSG00000053371	0.00174917864175	0.00174934414439	0.00174917863284	0.00174917863158	0.00174917936072	0.0017496583350899999	0.989504282254	983109111884.0	6347019.86857	0.156217974625	0.21736552993	0.593398349587	0.706473632886	O43488	O43488	AKR7A2	0.274334643633	0.133117843791	0.00214686392297	0.00214686385885	0.588253784795	6.23894243505	16.6861515267	0.149692246531			0.942509932227	ENSG00000053371	0.23476997538400002	0.26600378873799996	21.4619377358	202.0	False	False	True	True	False
ENSG00000053372	0.0038829882156100003	0.00388298822521	0.00388298830739	0.102468631151	0.0038829883280500003	0.00388298820055	0.878116427572	6240203623150.0	25095062.0105	0.0995430876093	-0.37009133991899995	0.371717929482	0.8848548495990001	Q9UKD2	Q9UKD2	MRTO4	0.0830085707675	0.000870824377087	0.374997364603	0.000870824377867	0.540252415874	27.432979180300002	22.769043807	0.230033821475			0.958790994781	ENSG00000053372	0.19555472793900003	0.117658591109	24.0417417947	202.0	False	False	True	False	False
ENSG00000053900	0.00436754589441	0.0122381172772	0.004367545802380001	0.0043675458921300005	0.00436754617829	0.00436754601966	0.965924152936	378593531160.0	6149387.38107	0.100058673775	-1.0875327692799999	0.12670667666899998	0.70219788463	Q9UJX5	Q9UJX5	ANAPC4	0.19316075258999998	0.00377435408649	0.34849662736500003	0.0261047489568	0.42846351700199997	0.327969852625	5.140756316	0.11140121937799999			0.84988704526	ENSG00000053900	0.15485992370100002	0.17679138298099997	22.0698007015	202.0	True	False	False	False	False
ENSG00000054116	0.00113775376147	0.0011377537763199998	0.00113775379725	0.551573247135	0.0313769252741	0.018236976965299998	0.395399589291	817402127450.0	6368791.686319999	0.141958315685	-0.0568094259966	0.49152288071999994	0.707298777286	O43617	O43617	TRAPPC3	0.028645901536500002	0.0433188979458	0.00493633296168	0.120629672479	0.802469195077	2.0061416902900002	12.785177951700001	0.11078323029100001			0.923989249825	ENSG00000054116	0.0657159098279	0.0716130161613	22.308894035300003	202.0	True	False	False	False	False
ENSG00000054118	0.00266909337106	0.0026690929589899995	0.00266909321553	0.0026690929297900003	0.00266909302823	0.0026690950997900003	0.9839854393970001	268165314332000.0	102977146.63	0.159023185155	1.24625396033	0.844936234059	0.9735203660639999	Q9Y2W1	Q9Y2W1	THRAP3	0.21955334636100002	0.005021057341310001	0.005021057545560001	0.00502105737046	0.765383481382	39.998660809200004	63.7786358049	0.0991625074338			0.988081327413	ENSG00000054118	-0.00977364211334	-0.0136639131455	26.673632291399997	202.0	True	False	False	False	False
ENSG00000054148	0.012451887317600002	0.0012517203293099998	0.0012517206328900002	0.00125172060651	0.0574616180266	0.0012517203775999999	0.925079612709	14026704217200.0	23039983.6848	0.16255324826099998	1.02630744252	0.806901725431	0.8766034055959999	Q9NRX4	Q9NRX4	PHPT1	0.30178572282099997	0.169947133016	0.243519230137	0.000973017025005	0.28377489699999997	22.760841089299998	21.3818191016	0.223125651939			0.9556750019470001	ENSG00000054148	0.262577782346	0.29694174435	23.0754050144	202.0	False	False	False	False	False
ENSG00000054267	0.0112281987515	0.0080296705096	0.00802967043994	0.0080296705564	0.12491768532099999	0.00802967052365	0.831735433898	366346321962.0	8190570.99422	0.07389783905330001	-1.78557300502	0.023480870217599998	0.745030380317	Q4LE39	Q4LE39	ARID4B	0.16198941042	0.0625129057381	0.6739305489640001	0.000545053815778	0.10102208106300001	2.1834457913900005	6.18743209342	0.23881453811099998			0.86496066059	ENSG00000054267	0.0264715579525	0.012225337811700002	22.9274802775	202.0	True	False	False	False	False
ENSG00000054523	0.00453943098029	0.100959855692	0.004539431040890001	0.211322265741	0.045427088113	0.0045394493285100005	0.83545531384	466814800771.0	7042135.36407	0.187350222801	0.220415556899	0.594373593398	0.722751481509	O60333-3	O60333	KIF1B	0.401353258678	0.186561484478	0.146322948149	0.000776210524003	0.26498609816999996	9.15284450971	14.8034467976	0.204369082432			0.934564150502	ENSG00000054523	0.018596156282200002	0.0102933429641	22.697179322600004	202.0	False	False	True	False	False
ENSG00000054611	0.0356110210383	0.00224504025341	0.00224504016646	0.00224504018234	0.111665674429	0.0316447778835	0.814343406047	50206603985.9	1626953.62748	0.137722611309	-1.49674379039	0.051312828207099995	0.47633335833800006	Q8WUA7	Q8WUA7	TBC1D22A	0.422075471287	0.11806193805199999	0.00414815316283	0.00414815322317	0.451566284275	0.25900777533	3.91633306116	0.12995014903899998			0.828386694711	ENSG00000054611	0.07326458899060001	0.118269721283	20.3329012139	202.0	False	False	False	False	False
ENSG00000054654	0.043933675073800006	0.00319548922062	0.027267501062599998	0.0499350914955	0.0762962654097	0.00319549055904	0.7961764871789999	182277884405000.0	109317604.094	0.123502823065	0.503257270247	0.682970742686	0.975395694246	Q8WXH0-2	Q8WXH0	SYNE2	0.349616260634	0.000668286751545	0.286773383316	0.0285260957688	0.33441597353	2.35416127565	5.33470820879	0.28761228726599997			0.852847238451	ENSG00000054654	0.47655294716799995	0.305043569217	25.916205325900002	202.0	True	False	False	False	False
ENSG00000054983	0.0006435059628189999	0.091946454562	0.000643505947147	0.379886562597	0.19651420323199997	0.0006435059431640001	0.329722261755	764769932362.0	3911754.19996	0.223559868212	0.8319719621089999	0.7688672168039999	0.63281074188	P54803	P54803	GALC	0.18923621774	0.0566663138101	0.00151505384269	0.0015150520434600002	0.7510673625640001	0.7898710286399999	4.05282490038	0.219290719081			0.830762639246	ENSG00000054983	0.442561013368	0.675618392459	20.2788524805	202.0	False	True	True	False	False
ENSG00000055044	0.00402662945622	0.00402662945304	0.00402662959225	0.00402662951847	0.00402662946637	0.0390677792744	0.940799073239	139748292889000.0	107285586.04100001	0.110187385374	0.178433299421	0.581020255064	0.974645562974	Q9Y2X3	Q9Y2X3	NOP58	0.204687144139	0.180759712198	0.00150227058709	0.00150227058804	0.611548602488	65.73349538720001	40.5189561033	0.200094483371			0.979434447301	ENSG00000055044	0.0803772869302	0.05499890113969999	26.372933292	202.0	True	False	False	False	False
ENSG00000055070	0.00192775886577	0.0019277786272	0.031496876653900004	0.00192775877476	0.0019277586598499998	0.052288615456099995	0.908503452963	137127915176.0	2439146.63216	0.151818615788	-0.8223301662450001	0.202925731433	0.553071787563	Q7Z422-2	Q7Z422	SZRD1	0.28772326639	0.36904318207599995	0.0024826409334499995	0.0024826407439899997	0.338268269856	10.6922245408	26.847462467199996	0.121795373441			0.9657630287450001	ENSG00000055070	0.00681871798264	0.01022590323	21.1477289233	202.0	False	False	False	False	False
ENSG00000055130	0.004111005526199999	0.016381095028	0.00411100547957	0.288169073615	0.00411100548463	0.004111005634969999	0.679005809231	22962808732200.0	48379680.1102	0.09904886691999999	-0.154837396711	0.454913728432	0.938414222489	Q13616	Q13616	CUL1	0.147371004646	0.0396392285764	0.412288864807	0.0027365339034300003	0.397964368067	12.572750140999998	32.8183671921	0.10804338261299999			0.9738256602009999	ENSG00000055130	0.273665829355	0.245767597371	24.268083310500003	202.0	True	False	False	False	False
ENSG00000055147	0.00381984560226	0.0008529257332510001	0.16085458385399998	0.0411386165553	0.1711103882	0.0008529257315880001	0.621370714324	2464464279660.0	7570819.948580001	0.20735683057999998	1.13771092219	0.828282070518	0.7331783062039999	Q9NRY5	Q9NRY5	FAM114A2	0.333533595918	0.0640240634958	0.006724198476069999	0.006724198474270001	0.588993943636	0.08887118601199999	2.37160602297	0.125700771548			0.791209005219	ENSG00000055147	0.149389619127	0.39252404120300005	22.159949821399998	202.0	False	False	True	False	False
ENSG00000055163	0.0106655859641	0.036742861239300005	0.28265861320999996	0.000970347418616	0.29600378108500003	0.000970346312728	0.37198846476999997	108622104686000.0	37899055.8798	0.274998747342	2.67419181428	0.9668417104279999	0.921686295102	E7EVJ5	E7EVJ5	CYFIP2	0.310834173547	0.24881480441599998	0.12800273236600002	0.009808139972650001	0.302540149699	2.9823583612599998	10.0955082952	0.171061282461			0.906286515541	ENSG00000055163	-0.0737753322222	-0.10820390023399999	25.5090151808	202.0	False	False	False	False	True
ENSG00000055208	0.00155229948775	0.00155229948741	0.0015522994992000002	0.402779462418	0.00155229961866	0.0187192594084	0.5722920800810001	72805084950.6	1940303.51366	0.139062869413	-1.3260667694200001	0.07696924231060001	0.510464331258	Q9NYJ8	Q9NYJ8	TAB2	0.26502472716	0.08760987404380001	0.37634344662	0.0031718859769299997	0.267850066199	4.840406509649999	22.243402889899997	0.0989098834159			0.957447222871	ENSG00000055208	0.00623605539932	0.010702199584299998	20.8328174975	202.0	True	False	False	False	False
ENSG00000055332	0.0439955897269	0.00207785989709	0.407590011912	0.128688574335	0.00207891312037	0.008129981349489999	0.40743906965899995	15458502517800.0	32432042.4921	0.12122980599500001	0.25742954480999997	0.60607651913	0.907883879679	P19525	P19525	EIF2AK2	0.18434944726	0.0369113833915	0.633417247031	0.0243646007779	0.12095732154000001	5.0060106985	13.206383521500001	0.16941894828499998			0.926637843733	ENSG00000055332	0.15935883287799998	0.14131858260500002	24.423942341900002	202.0	False	False	True	False	False
ENSG00000055483	0.039545711137	0.03586513705719999	0.00400084826122	0.0040008482620399995	0.00400084826058	0.0040008482639	0.908585758758	1260376214420.0	10544791.3801	0.10646628674599999	-0.522642498067	0.310502625656	0.777886130073	Q9P275	Q9P275	USP36	0.474053829952	0.0474841562909	0.00384493532916	0.0043765309976700004	0.47024054743	0.685068373542	6.1448796761199995	0.134695651734			0.8644932616650001	ENSG00000055483	0.18432071861	0.1635066069	22.849985096999998	202.0	False	False	True	False	False
ENSG00000055609	0.129194751517	0.0007220391501439998	0.0007220390718710001	0.000722039512169	0.18228630097600002	0.000722039311217	0.685630790462	508434440800.0	3042393.6847200003	0.234370026886	0.7393406445530001	0.7461365341339999	0.5918535743760001	Q8NEZ4-3	Q8NEZ4	KMT2C	0.21815181958500002	0.021541957779900003	0.540178620401	0.000734226145161	0.219393376089	0.768944912383	3.92334097768	0.223507221441			0.828464594531	ENSG00000055609	0.0212241652012	0.0296639726627	21.3923039399	202.0	True	False	False	False	False
ENSG00000055917	0.005585580068109999	0.005585580341159999	0.00558558007432	0.00558558005995	0.048359193258	0.0055855808396899995	0.923712905359	613509024986.0	7597673.554939999	0.103093159189	-0.87648347126	0.187471867967	0.73355337184	Q8TB72-3	Q8TB72	PUM2	0.291213508737	0.0029460533712800004	0.130509981596	0.00294605335157	0.572384402944	10.810596844800001	27.9337280153	0.117705277525			0.967593674535	ENSG00000055917	0.145299563658	0.11853436135600001	22.2785732891	202.0	False	False	False	False	False
ENSG00000055950	0.00184108121976	0.0018410812123399998	0.00184108120759	0.133038200676	0.06220900554219999	0.045170772848300005	0.754058777294	1147071800630.0	6687714.26261	0.16014655190500002	0.318851738944	0.62768192048	0.715100142525	Q8N983-4	Q8N983	MRPL43	0.0530407634883	0.0388366557556	0.38657415493600006	0.00872266521501	0.5128257606050001	2.40449511563	11.9838513383	0.129394416565			0.918984186336	ENSG00000055950	0.023168366787799998	0.0276096262012	22.5542099586	202.0	True	False	False	False	False
ENSG00000056050	0.0022241621365500005	0.0022234478349499997	0.0022234498994699995	0.00222346455507	0.15302756959	0.00782482008678	0.830253085897	9024253390720.0	20493319.0932	0.146586284951	0.694976322384	0.734208552138	0.862650963919	Q9NWY4	Q9NWY4	C4orf27	0.575272139988	0.0029462319801799998	0.0029462325955199997	0.00379982025196	0.41503557518399997	15.3186670906	27.7013896673	0.141289189107			0.967262600296	ENSG00000056050	0.40046575084799996	0.44138340775	22.138412626300003	202.0	False	True	True	True	False
ENSG00000056097	0.06238277193319999	0.0407789990298	0.0061301518142899995	0.00613015186234	0.229456623266	0.0061301518561	0.648991150238	10895820239300.0	38023901.9927	0.0868107049424	-0.651450413618	0.263315828957	0.9220613607379999	Q96KR1	Q96KR1	ZFR	0.0998615022363	0.191391814214	0.205922046845	0.00303435859113	0.49979027811399995	8.68631656745	26.887046831	0.10961619502			0.9658019786550001	ENSG00000056097	0.13961804764	0.123648440487	24.5770018121	202.0	False	False	False	False	True
ENSG00000056277	0.0424866654466	0.0016718442827800002	0.105102572268	0.0016718443005200002	0.124247061602	0.0016718442848400001	0.723148167815	414809128163.0	3341550.91376	0.19274187066	0.274367912519	0.61200300075	0.608806541145	Q8ND82	Q8ND82	ZNF280C	0.27494053257	0.0013310917765899997	0.224490970515	0.00133087792907	0.49790652721	1.4541359765000001	5.22164413509	0.230937914292			0.8512308171690001	ENSG00000056277	0.45322525396700003	0.41256528450999996	20.5715452789	202.0	False	False	False	False	False
ENSG00000056661	0.0133462190385	0.00176930128806	0.00176930122806	0.00176930170894	0.00176930136089	0.0017693016980599998	0.9778072736769999	634585560010.0	4990331.62397	0.159630430867	0.0992229877739	0.5510877719430001	0.6721926337109999	P35227	P35227	PCGF2	0.17592844725	0.0990573383148	0.108554627237	0.027038746526500002	0.589420840671	15.6836159524	25.9356514847	0.152695394353			0.9645555815219999	ENSG00000056661	0.16870760825199999	0.232915962772	21.1526118659	202.0	False	False	False	False	False
ENSG00000056998	0.34918430470399997	0.000423854726662	0.000423854725287	0.00042385472533800004	0.0713444105495	0.00042385472589099996	0.577775865843	750644120151.0	3045201.32393	0.28451229155499996	1.2997640510500001	0.854913728432	0.5921536268850001	O15488-2	O15488	GYG2	0.14036824308	0.0198867462445	0.000347691763986	0.7673802965369999	0.07201702237480001	58.3986357249	24.934052300500003	0.306484478151			0.962705460777	ENSG00000056998	0.497368248874	0.560419184166	18.8603879634	202.0	False	False	False	False	False
ENSG00000057019	0.0557870698355	0.001310050971	0.041553810426599995	0.0013100575411800002	0.00131005230928	0.00817775321316	0.890551205703	40213967573.9	1129455.39053	0.17754946957400003	-1.06186644736	0.133083270818	0.394494036456	Q96PD2	Q96PD2	DCBLD2	0.156398950826	0.22873960144299998	0.00129457956526	0.00129457956486	0.612272288601	4.52083990788	11.2084853146	0.18969794967			0.914212822311	ENSG00000057019	0.13534125889	0.18747334340900002	19.4119918746	202.0	False	False	True	False	False
ENSG00000057294	0.0007894129466499999	0.000789412945965	0.000789412945262	0.000789412980672	0.0007894129470519999	0.030564538465400002	0.965488396769	4536891178410.0	8181974.467569999	0.260328107555	1.84705752281	0.9175543885969999	0.7449553671889999	Q99959	Q99959	PKP2	0.479278836327	0.0461510405205	0.000749902993474	0.0890805091476	0.384739711012	4.13126189058	7.5994888354	0.267458855652			0.882585495053	ENSG00000057294	0.602849557255	0.603738338464	21.0392735116	202.0	False	False	False	False	False
ENSG00000057608	0.00236762183658	0.0023676217328400004	0.0023676217083800004	0.00236762223633	0.0781302131188	0.0125390550418	0.899860244325	1379082483820000.0	294199913.107	0.126227093149	0.23718283335700002	0.598799699925	0.994148976071	P50395	P50395	GDI2	0.45424639879900003	0.23636667948399998	0.0038503637135799997	0.0038503636974	0.301686194305	260.068919325	147.038847107	0.10967613504799999			0.9963387084209999	ENSG00000057608	-0.0264548052506	-0.042450093884800005	28.408877114499997	202.0	False	False	True	False	False
ENSG00000057663	0.0041089336688	0.00410893384363	0.00410893347353	0.0410876877135	0.0210742423942	0.00410893647712	0.9214023324289999	241345990731.0	4640029.08305	0.105876442818	-1.15991281342	0.109527381845	0.660790638362	Q9H1Y0	Q9H1Y0	ATG5	0.174452075427	0.0033253755212800003	0.5698912645449999	0.0033253754184699997	0.249005909089	2.0705599444400002	13.9418434419	0.10321045735300001			0.9307081093709999	ENSG00000057663	0.00638726369852	0.00985569656641	22.0735960027	202.0	False	False	False	False	False
ENSG00000057757	0.0812644960931	0.0012438791213	0.0457508766836	0.205151349743	0.0320166661335	0.057665955769800006	0.576906776455	1247100843960.0	6718794.03911	0.16621088362	0.428846483691	0.662940735184	0.7156252344159999	Q9GZP4-2	Q9GZP4	PITHD1	0.054153154407	0.0011913373904	0.658044502053	0.037128330915699996	0.249482675234	10.4950505193	23.0392821352	0.14061230374800002			0.9593168185709999	ENSG00000057757	-0.0202471197278	-0.0282163161123	22.7980584267	202.0	False	False	False	False	False
ENSG00000057935	0.00587025521065	0.010978208046600001	0.0058702553555500005	0.005870255105970001	0.18571953253899998	0.00587025515348	0.779821238589	3059342331490.0	19320127.2173	0.09053240471200001	-0.717251136723	0.23863465866500003	0.8558997824619999	E7EV10	E7EV10	MTA3	0.17814986025600002	0.00118402846638	0.249681363538	0.00118402844708	0.569800719293	13.6528922203	19.809631543	0.18652452088500002			0.9521110851450001	ENSG00000057935	0.412201557439	0.222740518755	23.248516806199998	202.0	True	False	False	False	False
ENSG00000058056	0.0295083353657	0.00875719030658	0.00236749962268	0.00236749977013	0.0023674978329799997	0.00493707029808	0.949694906804	1175289785770.0	8582716.45073	0.12631290287	-0.19933930039900002	0.43593398349600004	0.751106443628	Q92995	Q92995	USP13	0.472970282883	0.0873614562254	0.034978874450199995	0.00229150610208	0.40239788034	1.60570929261	8.878038057789999	0.142730391808			0.896042689102	ENSG00000058056	0.0831803356439	0.11383504963199999	22.6424698073	202.0	False	False	False	False	False
ENSG00000058063	0.012120283895700001	0.00123604806166	0.00123604806116	0.07472694467180001	0.00123604806487	0.07263212314510001	0.8368125041	702040551020.0	4688502.97936	0.178709196792	0.361573575276	0.642535633908	0.662590953417	Q9Y2G3	Q9Y2G3	ATP11B	0.09898958779650001	0.0565672932925	0.6480105868230001	0.0006362668379839999	0.19579626525	1.5595026526499998	6.312246674880001	0.197837719254			0.866849731246	ENSG00000058063	0.014809052826700001	0.024938823268800002	22.0313670775	202.0	False	False	True	False	False
ENSG00000058091	0.00139242911374	0.04821349070119999	0.0323599650446	0.0013924270849300002	0.392402890015	0.00886898505907	0.5153698129819999	38942558511.9	1034018.2961200001	0.190846419827	-0.883637539358	0.18589647411899998	0.37379041332199997	O94921	O94921	CDK14	0.394071650633	0.000445552949325	0.00044555296710400006	0.0582396897938	0.546797553656	13.527797681300001	8.38946213114	0.43840897029			0.8910571005689999	ENSG00000058091	0.465520260335	0.33860578088	18.8410865405	202.0	False	False	True	False	True
ENSG00000058262	0.000502718689537	0.0005027186895560001	0.000502718689524	0.616017538704	0.000502718689699	0.0301749194332	0.351796667105	13368260163100.0	20695024.7304	0.176673533352	1.23695970451	0.843210802701	0.863851173955	B4DR61	B4DR61	SEC61A1	0.249793097823	0.38761087368600006	0.00206873316193	0.00206873316315	0.358458562167	38.177626335700005	45.6715389892	0.135287856307			0.9822193658949999	ENSG00000058262	-0.0791925782502	-0.150980301262	25.0778331915	202.0	False	False	False	False	False
ENSG00000058272	0.009741724072450001	0.009741732761999999	0.00974172598965	0.0369332987299	0.00974172595462	0.109568710855	0.814531081636	23760929157200.0	71963484.1062	0.06773599710799999	-1.16063915859	0.109302325581	0.95919285875	O14974	O14974	PPP1R12A	0.148443135919	0.0651696169965	0.647302302055	0.00198183735935	0.13710310767	2.2189079394999998	13.1618188569	0.11317584159000002			0.9262872945389999	ENSG00000058272	-0.0036746081465300006	-0.00210729108327	26.1017363866	202.0	True	False	False	False	False
ENSG00000058453	0.0164465283807	0.0700003911168	0.00431873499683	0.294112323476	0.005617283567189999	0.00431873462315	0.605186003839	3747158243160.0	21879159.7983	0.088474960347	-0.7418195876989999	0.230457614404	0.870227289776	Q5TZA2	Q5TZA2	CROCC	0.288736924075	0.010533018219700001	0.0016089805316099998	0.06443937964390001	0.63468169753	2.0315825469099997	7.502511189780001	0.189981181729			0.8813390979200001	ENSG00000058453	0.325451902089	0.202870998015	23.7523363753	202.0	False	False	True	False	False
ENSG00000058600	0.00782753486338	0.00782753481282	0.00782753481477	0.00782753665195	0.0254334088699	0.00782753481303	0.935428915174	522043831872.0	9727948.42092	0.07427321532610001	-1.62436575396	0.0363090772693	0.7675343185060001	Q9NVU0	Q9NVU0	POLR3E	0.17515068337	0.0362419162748	0.42878512609499997	0.0030981364211199996	0.356724137838	0.807932510733	7.871154700419999	0.114195527236			0.8855456882449999	ENSG00000058600	0.24329735428899998	0.260301803843	22.3760796967	202.0	False	False	False	False	False
ENSG00000058668	0.0008222510598799999	0.00082225105964	0.000822251071178	0.0008222510607210001	0.06302805193109999	0.0101046074447	0.923578336373	3407840696370.0	6664538.09769	0.276993506133	1.8977428457700003	0.922430607652	0.714650063761	P23634-8	P23634	ATP2B4	0.07472145228299999	0.158148766255	0.26306772548	0.00029567489611799996	0.503766381086	13.8687380042	10.6136797448	0.350875054255			0.910045181896	ENSG00000058668	0.426530347016	0.336687028384	21.4946608058	202.0	False	False	False	False	False
ENSG00000058673	0.00931277723103	0.00931277835124	0.00931277719665	0.00931277729478	0.174337090335	0.009312779165270001	0.7790990204260001	3139318823310.0	25635335.3722	0.06911601792580001	-1.41777541252	0.062115528882200004	0.886655164654	O75152	O75152	ZC3H11A	0.40020020108099996	0.005622113532699999	0.0056221608926799995	0.00562211360874	0.5829334108850001	2.53605296323	16.0588649092	0.09916634687789999			0.940153462647	ENSG00000058673	0.11841901684100001	0.109029877903	24.1667319115	202.0	False	False	False	False	False
ENSG00000058729	0.030433341838799997	0.0033192634117700003	0.00331922073463	0.173947726622	0.00331922072971	0.0890537864177	0.696607440245	523798754405.0	6508333.763830001	0.111201952857	-0.749061084293	0.227906976744	0.710824394269	Q9BVS4	Q9BVS4	RIOK2	0.322671946558	0.00493259986516	0.00493260016741	0.0332779307013	0.634184922708	0.7561205924619999	7.976864668889999	0.109009239263			0.8866557606919999	ENSG00000058729	0.230657976721	0.31403498722600004	21.6236163968	202.0	False	False	True	False	False
ENSG00000058799	0.00069317247795	0.0006931724900619998	0.0682753182995	0.396901028071	0.000693172496724	0.022260787977400002	0.510483348187	87745800653.0	1380697.22662	0.21454318224399999	-0.391563177777	0.362040510128	0.43912684719800005	C9JFB2	C9JFB2	YIPF1	0.384359614848	0.152300520553	0.0051910015192	0.00519100151005	0.45295786156999995	1.69267986794	12.6462136164	0.102879039499			0.9230739269299999	ENSG00000058799	-0.09796336903069999	-0.223901377321	21.1712314551	202.0	False	False	False	False	False
ENSG00000058804	0.0043330588275	0.00433305881247	0.00433305879672	0.316308797589	0.00433305880172	0.00433305906363	0.662025908109	2612212000020.0	17712855.4193	0.09124637760060002	-0.731773083499	0.233308327082	0.8447978396220001	Q9BTX1-5	Q9BTX1	NDC1	0.283950284906	0.247689414577	0.0018967979011	0.0018967979000799999	0.46456670471600003	20.8279653932	32.100482376500004	0.142171277244			0.972968762172	ENSG00000058804	-0.00229476274981	-0.00185657258191	24.0718543579	202.0	False	False	False	False	False
ENSG00000059573	0.0179471775967	0.0558160333635	0.00641337702229	0.00641337757609	0.167799001901	0.0348987131501	0.7107123193899999	56562668120600.0	85397054.6023	0.0880687945304	-0.42060475774800005	0.351537884471	0.967069237116	P54886	P54886	ALDH18A1	0.11788139010299999	0.230616249931	0.00530940477221	0.00530940477225	0.640883550422	19.8377776693	48.2695735998	0.0922726613709			0.983465763029	ENSG00000059573	0.236229200566	0.267009349423	24.8335932112	202.0	False	False	False	False	False
ENSG00000059588	0.00104956975059	0.0010495697280599999	0.00104956967647	0.00104956967753	0.0010495697157200002	0.0326316369088	0.962120514543	113992950319.0	1786280.5353400002	0.189011979812	-0.504097307393	0.318229557389	0.494786587653	Q13395	Q13395	TARBP1	0.38778372151100005	0.0012346213708099999	0.053533954374699995	0.0012346213843699998	0.55621308136	1.55049383811	5.4172283301499995	0.22985707787700002			0.853996260809	ENSG00000059588	0.131701835888	0.14385975123	20.3376050197	202.0	False	False	False	False	False
ENSG00000059758	0.124007796938	0.041384808606500005	0.00204144938103	0.00204144938601	0.205042497987	0.00204144966217	0.6234405480399999	279926445865.0	3702779.7403	0.14288745014	-0.500743843509	0.319279819955	0.624409271623	Q00537	Q00537	CDK17	0.16876418165600002	0.0209935422922	0.0453287593157	0.0028161324279299994	0.762097384308	0.826756834584	6.03233347019	0.150731338381			0.862915790294	ENSG00000059758	0.213139215169	0.351110181651	20.8199783598	202.0	False	False	False	False	True
ENSG00000059804	0.00106728852541	0.00106728853358	0.00106728850733	0.16197592848099998	0.410807933935	0.00106728853913	0.422946983479	36467669460400.0	30634155.5177	0.1971278985	1.64577172169	0.898199549887	0.90368314455	P11169	P11169	SLC2A3	0.558836573649	0.000286226940059	0.000286226940099	0.0545983882109	0.38599258426	6431.17986597	184.657789456	0.43428786635899996			0.997098231674	ENSG00000059804	0.493194509679	0.299085312406	22.625545894800002	202.0	False	False	False	False	True
ENSG00000060069	0.016461135468299998	0.046797425241199994	0.00497974847802	0.347587554875	0.0233300560073	0.07792641999080001	0.48291765993999997	1696847257100.0	16272278.3493	0.08005215190510001	-1.1426227822700001	0.113728432108	0.8340709624179999	Q9Y5B0	Q9Y5B0	CTDP1	0.33251557087	0.200183480786	0.00295975041738	0.00295975041616	0.461381447511	1.34767952264	8.397159138380001	0.138248660147			0.891193425255	ENSG00000060069	0.150952788595	0.122655303744	23.544026636199998	202.0	True	False	False	False	False
ENSG00000060138	0.00157148381412	0.0015714838256300002	0.00157148381922	0.303931477529	0.00157148381685	0.00984051954533	0.67994206765	6641855599850.0	16840761.6078	0.15303225806600002	0.739403715199	0.746211552888	0.838421723802	P16989	P16989	YBX3	0.283259887659	0.00449548016984	0.00449548016998	0.004495480171	0.70325367183	16.079738209600002	36.1937308483	0.11079142146299999			0.976630053751	ENSG00000060138	0.239804510627	0.357329904827	22.1259250732	202.0	True	False	False	False	False
ENSG00000060237	0.0044695177434	0.004469517745149999	0.00446951774342	0.00446951774503	0.204333034575	0.00446951774537	0.7733193767030001	5716924714180.0	22789807.0909	0.104915725344	-0.239539440447	0.42265566391599996	0.8754031955589999	Q9H4A3-7	Q9H4A3	WNK1	0.422574819709	0.297620484436	0.011277987988	0.0011481014948	0.267378606372	16.7066339298	23.7163022146	0.17234452937300002			0.9605047908390001	ENSG00000060237	0.10688179726500001	0.0663620210057	24.1358365364	202.0	True	False	True	False	True
ENSG00000060339	0.00417947190906	0.00417947182645	0.0041794718079	0.011540484192	0.00417947192416	0.00417947698889	0.967562151352	43304397608700.0	53312378.1491	0.12343489300999999	0.522774205904	0.688447111778	0.9438151676540001	Q8IX12-2	Q8IX12	CCAR1	0.41449129374399996	0.052627614204	0.186883828428	0.0014636500216600001	0.344533613602	24.6527253224	25.3428906845	0.19591889297			0.9633870842100001	ENSG00000060339	0.08492929492180001	0.042498170695000004	25.460071505	202.0	True	False	False	False	False
ENSG00000060491	0.00217757919072	0.0326539239224	0.0021775790990100005	0.23023615380600002	0.00217757912242	0.0162566972949	0.7143204875650001	299912746969.0	4282062.82436	0.127892308782	-0.700344793848	0.244936234059	0.6475883279569999	Q9NZT2-2	Q9NZT2	OGFR	0.307242816845	0.00168873983665	0.141736771383	0.00168873983637	0.547642932099	2.26190348313	7.48376690722	0.200963313303			0.881183298278	ENSG00000060491	0.369923005035	0.371191710688	20.8757900447	202.0	False	False	True	False	False
ENSG00000060688	0.00846302508279	0.006755890187189999	0.00675589018451	0.00675589018861	0.00675589021524	0.00675589018761	0.957757523954	9060264411570.0	35621254.9266	0.0845008778318	-0.754640982932	0.22610652663199998	0.9165103893179999	Q96DI7	Q96DI7	SNRNP40	0.24414234125700002	0.07387020042119999	0.323698958286	0.013157376962700001	0.345131123072	5.05577809208	24.4736969744	0.09187438043610001			0.961868037704	ENSG00000060688	0.019188988629299998	0.018314386633099998	24.9950456312	202.0	True	False	False	False	False
ENSG00000060749	0.00476701573902	0.110663288781	0.00476701573078	0.00476701574501	0.0047670157609	0.0047670157741999996	0.865501632469	10514880087100.0	33012123.6261	0.09822650673239998	-0.344608374511	0.381095273818	0.90923411597	Q2KHR3	Q2KHR3	QSER1	0.327259838692	0.16633803937	0.125986560429	0.000844531704089	0.37957102980400004	34.154705716500004	29.2532432048	0.19977965189599997			0.9694632702339999	ENSG00000060749	0.174557303183	0.0788685481189	24.577562016599998	202.0	False	False	True	False	False
ENSG00000060971	0.00246722898369	0.00246723455777	0.00246722903233	0.0024672302189699996	0.126186315614	0.00246722900389	0.8614775325890001	710758434834.0	6038509.52542	0.139614734716	-0.137924070771	0.462265566392	0.699347385793	P09110	P09110	ACAA1	0.274813518042	0.10903438065099999	0.17368384213	0.00257651205982	0.439891747117	0.238392638121	2.6909968634900006	0.18144007982299998			0.800381709122	ENSG00000060971	0.218867445253	0.332397874534	21.8821052712	202.0	False	False	False	False	False
ENSG00000060982	0.0007764676927069999	0.0007764676968290001	0.0007764677221229999	0.000776467864948	0.276099625346	0.0007764677078900001	0.72001803597	120804099147000.0	40283118.5511	0.272846100401	2.67935033181	0.9671417854459999	0.926187082739	P54687-4	P54687	BCAT1	0.458853293635	0.07850755754750001	0.0011101275495999999	0.00111012754257	0.460418893725	130.96985719399999	54.2176553208	0.211078959505			0.985530108281	ENSG00000060982	0.246378601922	0.280755728732	23.5779408978	202.0	False	False	False	False	True
ENSG00000061273	0.0030240133548599998	0.0030240133326300002	0.0030240130007499998	0.0030240129948000006	0.04925562051440001	0.00555812223822	0.933090204564	430909008016.0	5234016.24826	0.125417378833	-0.5526086097940001	0.299399849962	0.6784937364040001	J3KPH8	J3KPH8	HDAC7	0.19765975653999998	0.0800999156962	0.502379472487	0.00195314647393	0.217907708803	1.9272974679900003	9.813548712989999	0.141464768378			0.904183220379	ENSG00000061273	0.0755211899454	0.06928641745460001	22.074282167600003	202.0	False	False	True	False	False
ENSG00000061676	0.0160687543263	0.0208599029196	0.00189132451845	0.435698326597	0.0018913245243499998	0.0018913245120700001	0.5216990426020001	42003454139400.0	52436889.5709	0.12359633148700001	0.51976706306	0.6876969242309999	0.9429900232539999	Q9Y2A7	Q9Y2A7	NCKAP1	0.29323404099399997	0.0887292033665	0.31655867972199997	0.00164576099874	0.29983231491900003	6.961647881760001	17.9265726517	0.147183376232			0.946443873179	ENSG00000061676	0.162079987806	0.147232658434	25.003747484	202.0	True	False	True	False	False
ENSG00000061794	0.048962285919	0.00271575670361	0.0027157564145599998	0.0027157650158099998	0.19555531343199997	0.00271575642046	0.744619366094	3897830816400.0	15407017.5775	0.128142417901	0.196726139381	0.587171792948	0.827019728452	P82673	P82673	MRPS35	0.296951685554	0.0027634509468600003	0.0027634508670599995	0.00276345092871	0.694757961704	23.492243191999997	35.4188214686	0.136844749112			0.976026330139	ENSG00000061794	0.13725606148	0.14260637095	23.1222882418	202.0	True	False	True	False	False
ENSG00000061936	0.00298537663766	0.0631702070128	0.0029853766367399994	0.0029853766367800003	0.149407499744	0.0448452338808	0.733620929451	2483796664090.0	12324323.5659	0.127877732797	0.102628029689	0.552438109527	0.800015002625	Q12872	Q12872	SFSWAP	0.0858015215181	0.37198015802900003	0.0028314927979299995	0.006753983284180001	0.53263284437	1.30068714316	7.4281354567	0.153534722697			0.880579574667	ENSG00000061936	0.129257205708	0.162680026442	23.0319731783	202.0	False	False	False	False	False
ENSG00000061987	0.0264966752018	0.005470893513529999	0.00547089346646	0.005470893474270001	0.08820828182	0.00547089352481	0.863411468999	873662064878.0	9820699.2689	0.09517641168980001	-0.9013132109440001	0.180495123781	0.768884554797	Q7Z3U7-5	Q7Z3U7	MON2	0.38508122849799997	0.00414783069068	0.00414783073179	0.00414783095369	0.6024752791260001	0.19235325264000003	3.34806327236	0.13099541964199998			0.816020098154	ENSG00000061987	0.217258882478	0.20971222382	22.769878651	202.0	False	True	True	True	False
ENSG00000062038	0.00123659185662	0.111508851037	0.00123659169203	0.0543782220301	0.00123659220216	0.0012365917065	0.8291665594750001	1269855185960.0	5772387.94396	0.19521877691300002	0.799155761373	0.761590397599	0.692671217463	P22223	P22223	CDH3	0.500324126844	0.013421082947799999	0.00177299363805	0.00177299336068	0.482708803209	63.527438410600006	49.27886157060001	0.161740955945			0.983855262133	ENSG00000062038	0.402563558881	0.404722562946	20.119188628499998	202.0	False	False	True	False	False
ENSG00000062194	0.00301522250962	0.0030152221429199997	0.0030152222550100002	0.05608433499630001	0.00301522384989	0.00301522230452	0.928839551942	104085274146.0	2480900.60037	0.13004249132200002	-1.24492591771	0.09122280570139998	0.5559972995269999	D4PHA4	D4PHA4	GPBP1	0.054235151891800004	0.005309047355399999	0.527140781352	0.0053090470050399996	0.408005972396	4.3425646019	29.1496585579	0.07148907403860001			0.969385370414	ENSG00000062194	0.06408085143140001	0.10969044477800001	20.6818698676	202.0	False	False	False	False	False
ENSG00000062485	0.0191527855454	0.00304472102317	0.00304472084996	0.16139902698	0.0030447208431199995	0.0507139252983	0.7596000994600001	36530068482700.0	49323486.7392	0.122538193453	0.46808994901100004	0.673968492123	0.939464406271	B4DJV2	B4DJV2	CS	0.336438022191	0.242178056758	0.007616047699930001	0.00270607763035	0.41106179571999996	23.6477768148	37.5024110729	0.129668942505			0.977779076108	ENSG00000062485	0.31060495402800004	0.300160908947	23.981662892600003	202.0	False	False	False	False	False
ENSG00000062598	0.0761004669438	0.00304683371841	0.0030468337499600004	0.0030468337184699997	0.00304683371838	0.0433297051492	0.868382493002	527216875379.0	5829878.66677	0.124547534628	-0.49074840096	0.323555888972	0.6939464406270001	Q5JVZ5	Q5JVZ5	ELMO2	0.043764245523499994	0.0395379769955	0.00713494397706	0.00713494406739	0.902427889437	0.283620726069	5.62163894255	0.09473403448909999			0.856859079224	ENSG00000062598	0.164427724364	0.2458139209	21.773940281599998	202.0	False	False	True	False	False
ENSG00000062650	0.010851754543299999	0.00812858653497	0.00812858646315	0.008128592569010001	0.224448651554	0.00812867055939	0.7321851577770001	4066236386860.0	27446652.8398	0.0734694725556	-1.22584099905	0.0950487621905	0.8931813067290001	Q7Z5K2-2	Q7Z5K2	WAPAL	0.273052976191	0.357252554529	0.154222626639	0.012648397987799999	0.202823444653	5.13129378047	18.9123828528	0.11977527840999998			0.949462491236	ENSG00000062650	-0.042961637697900006	-0.0270269726342	24.8170591023	202.0	False	False	False	False	True
ENSG00000062822	0.009233525203120001	0.0655042126595	0.00923352504656	0.009233529729899999	0.009233525726260001	0.009233525692860001	0.888328155942	11043951252300.0	46613148.5412	0.07129413458610001	-1.12103169706	0.118229557389	0.936388868052	M0R2B7	M0R2B7	POLD1	0.27837532421100003	0.360243428512	0.19235383652600002	0.00181246921504	0.167214941536	6.692162858580001	19.9426237267	0.129718212491			0.952442159383	ENSG00000062822	0.21084942493900002	0.138638507546	24.860985833	202.0	False	False	True	False	False
ENSG00000063046	0.00639323629924	0.0063932363430699995	0.006393236437949999	0.00639323650256	0.0063932369830299995	0.006393236383090001	0.961640581051	35782689468900.0	69827190.044	0.0856666776063	-0.48286646072800005	0.326481620405	0.958217688095	E7EX17	E7EX17	EIF4B	0.49778979804300005	0.23767202181400002	0.00123534148692	0.00123534141491	0.26206749724100004	921.4920512169999	179.443627509	0.16916782150100002			0.9970008568979999	ENSG00000063046	-0.137746514273	-0.07500774753489999	26.5937285948	202.0	False	False	True	False	False
ENSG00000063169	0.0202601639075	0.0028069221875900003	0.00280692227651	0.00280692229355	0.0241471281886	0.0792813001022	0.8678906410439999	363961597937.0	4719285.78105	0.127835508784	-0.598207432717	0.282295573893	0.663641137199	Q9NZM4-2	Q9NZM4	GLTSCR1	0.372961301002	0.00390286882484	0.133079156632	0.0039028688248299997	0.48615380471600006	0.407279509772	4.992428679690001	0.127830477518			0.847764275142	ENSG00000063169	0.023039371474299998	0.0293507940203	22.0602099445	202.0	False	False	False	False	False
ENSG00000063177	0.08795793616689998	0.00304251392614	0.0625002718235	0.0030425156333600003	0.07821811853630001	0.0784231781335	0.6868154657800001	78539676010800.0	76274875.0957	0.11618847394000001	0.392361113416	0.652063015754	0.9622683969689999	G3V203	G3V203	RPL18	0.31401475985800004	0.241655317154	0.014081379354000001	0.0018583608603800002	0.428390182773	695.905011216	153.838078301	0.171479076417			0.996475033107	ENSG00000063177	-0.021633779352	-0.022188247530799995	26.352770254099998	202.0	False	False	False	False	False
ENSG00000063241	0.0007066575325209999	0.000706659005928	0.000706666770888	0.139828063736	0.33015554893000004	0.000706658157847	0.527189745867	360940567067.0	2520518.6515	0.238357012054	0.526550376375	0.689872468117	0.558922811492	Q96AB3	Q96AB3	ISOC2	0.139104970164	0.0621796493473	0.279122742594	0.00141739454327	0.5181752433519999	2.57301509587	8.779193007749999	0.18271178907699998			0.895166316117	ENSG00000063241	0.0516953138332	0.07711767399139999	20.9914082298	202.0	False	False	False	False	True
ENSG00000063244	0.00388324387592	0.00388324382805	0.0038832438280900004	0.44801543718500003	0.0038832438315999996	0.0038832438875799997	0.532568343564	53298282650200.0	89429885.0228	0.08163453727919999	-0.6479483749189999	0.264366091523	0.968944565299	P26368-2	P26368	U2AF2	0.15442350163	0.00141121158696	0.43820916521799996	0.0014112115736500002	0.404544909991	74.1246834644	57.544285413900006	0.149616408201			0.986484381086	ENSG00000063244	0.0760367547727	0.0420632753925	26.164072780999998	202.0	True	False	False	False	False
ENSG00000063245	0.0393602789059	0.00810218160067	0.00810218159752	0.00810218166159	0.27462474489	0.00810218160136	0.653606249743	903337139899.0	12641261.6667	0.0751855726811	-1.41762063399	0.062190547636900004	0.8029405145899999	Q9Y6I3	Q9Y6I3	EPN1	0.40430524292	0.005448787600560001	0.00544878759183	0.00544878758594	0.579348394302	22.996021331999998	47.185822835100005	0.10162833691199999			0.982939939238	ENSG00000063245	0.21483212494399997	0.204954889593	22.428057913299998	202.0	True	False	False	False	True
ENSG00000063601	0.0024186239699199997	0.0723606436828	0.0130100931474	0.0024186239662600004	0.16166745734899998	0.0208844624148	0.7272400954699999	546781085431.0	5271884.04143	0.140262279389	-0.22376133326499997	0.427306826707	0.679618933313	F8WA39	F8WA39	MTMR1	0.497688138963	0.299502610917	0.000973226127986	0.0009732256659089999	0.200862798326	0.569855114234	2.47997333068	0.304393388085			0.7943639479629999	ENSG00000063601	0.46951849672	0.413879570071	21.5738460985	202.0	False	False	False	False	False
ENSG00000063660	0.0007612113872489999	0.037984861409900005	0.0007612116206529999	0.000761211691516	0.0007612190911950001	0.000761224005777	0.958209060794	83918407329.3	1167514.68346	0.248122566765	-0.08243547889660001	0.481695423856	0.402670467332	P35052	P35052	GPC1	0.472481863929	0.017885372483	0.00187121665229	0.065319553108	0.44244199382700006	2.35294821373	8.857206108189999	0.17318466487300002			0.895789514684	ENSG00000063660	0.290150984633	0.45585368340899995	18.6311296215	202.0	False	False	False	False	False
ENSG00000063854	0.154152180453	0.00137854364768	0.0013785437129000002	0.07133047951100001	0.00137855836511	0.010102617117100001	0.760279077193	650679435687.0	5277219.992459999	0.15285453971100002	0.025216292323	0.52415603901	0.679768959568	Q16775	Q16775	HAGH	0.10373681619899999	0.0033113154366600003	0.0033113154129999997	0.04615304368419999	0.843487509267	0.489062786424	4.11964809398	0.16975484929			0.831814286827	ENSG00000063854	0.410244342222	0.5607743383179999	20.9789514789	202.0	False	True	False	False	False
ENSG00000064042	0.00022154274448099996	0.0946527755322	0.00022154274266199999	0.10320721467800001	0.17801630252	0.000221542744107	0.623459079038	2729702846190.0	3743272.8044	0.441373451853	2.76161957573	0.970142535634	0.625609481659	G5EA03	G5EA03	LIMCH1	0.7570068990600001	0.106396346624	0.00017213797566099998	0.00017213784537200002	0.136252478495	4.8767463415400005	1.7025163891600001	1.29710096403			0.769786554491	ENSG00000064042	0.580634455733	0.458631099308	21.2130345866	202.0	False	True	True	True	False
ENSG00000064102	0.015196634132999999	0.057794432838500005	0.00874357131187	0.008743571364040002	0.035134820859800006	0.00874357215028	0.865643397343	2027670363610.0	19384447.1596	0.07345904148639999	-1.3188901047200001	0.078319579895	0.856049808717	Q9NVM9	Q9NVM9	ASUN	0.215738588899	0.0023340193816300003	0.0577867688396	0.00233401929091	0.721806603589	18.8037932205	28.472798855100002	0.152297429496			0.9683921476980001	ENSG00000064102	0.101724163454	0.0516070952791	23.9585344747	202.0	False	False	False	False	False
ENSG00000064300	0.036345169328400005	0.00047691100311400005	0.045033426657999996	0.09096481818180001	0.0773993043877	0.042663178404	0.7071171920370001	86247190717.8	1000032.90099	0.293669058231	0.337806275666	0.634358589647	0.365914034956	P08138	P08138	NGFR	0.304811833365	0.000330308325537	0.23952908131200001	0.016379134285600002	0.438949642712	7.53978556655	6.7207186430900006	0.40856746771700003			0.8726143179870001	ENSG00000064300	0.538003181422	0.55787790748	18.2212654776	202.0	True	False	False	False	False
ENSG00000064313	0.00455898262574	0.0045589842126	0.0047379627165200005	0.141012867228	0.044462170158599996	0.027568976283	0.7731000567759999	275114192434.0	5663651.10652	0.0926104523624	-1.36576655688	0.06976744186049999	0.6899707448800001	Q6P1X5	Q6P1X5	TAF2	0.592984242678	0.11256504295299999	0.0037872994317399997	0.0037872992615300004	0.286876115675	1.03566824751	9.13200511392	0.11144079066			0.898223884085	ENSG00000064313	0.130230131379	0.165224650292	21.879192135900002	202.0	True	False	False	False	False
ENSG00000064419	0.012063680964	0.00426068020993	0.00426066550701	0.243679019359	0.00426066846902	0.028639237434900003	0.702836048056	10699877584700.0	36458333.4844	0.0897206872161	-0.573374868451	0.29159789947500003	0.918160678119	Q9Y5L0	Q9Y5L0	TNPO3	0.468671377627	0.225796308337	0.00294091669494	0.00294091660049	0.299650480741	27.962597398899998	47.2342479536	0.11195197249000002			0.982959414193	ENSG00000064419	0.10923615669299999	0.10484933888499999	24.512927210900003	202.0	False	False	False	False	False
ENSG00000064607	0.00269726222138	0.0974916710863	0.00269725985905	0.00847072402122	0.181455506553	0.0026972598637600006	0.7044903163959999	27715364692000.0	40818147.389	0.128975437368	0.523736956072	0.688597149287	0.9273872927760001	M0R2Z9	M0R2Z9	SUGP2	0.282766649639	0.0299965271796	0.00172098757914	0.0017209875787	0.6837948480230001	11.317732393599998	20.4964614545	0.16413485668400002			0.9538054062479999	ENSG00000064607	0.386008246163	0.29566937573	23.9652294102	202.0	False	False	False	False	False
ENSG00000064651	0.0025962493529099995	0.00259624935754	0.00259624935021	0.00259624935296	0.22907725930999998	0.0311801319117	0.729357611365	1516579002680.0	8145999.816319999	0.151177835653	0.275441759788	0.612603150788	0.744205235916	P55011	P55011	SLC12A2	0.270370467773	0.19385318415199998	0.00128336562955	0.0612453402	0.473247642245	0.33020835501699997	2.29007701532	0.25092500468699996			0.7893394095190001	ENSG00000064651	0.32363007308	0.238967591818	22.527352412	202.0	False	False	True	True	True
ENSG00000064652	0.00152323161204	0.00152323163136	0.00152323163467	0.00152323171925	0.17388591427499997	0.0332619289272	0.786759230201	17007813517.8	743618.211579	0.175377641516	-1.3113083741299998	0.0798949737434	0.292701222714	A8MXB7	A8MXB7	SNX24	0.39081110179799994	0.07125446775910001	0.00435804278963	0.00435804278915	0.529218344864	0.365485045581	4.9138642936900006	0.12303017662900001			0.846517878009	ENSG00000064652	0.0950262150452	0.229635786762	18.881284729100003	202.0	False	False	True	False	False
ENSG00000064666	0.15128158696	0.00180272847125	0.0018027006478699998	0.256686189406	0.10340979944800001	0.0018027008570999999	0.48321429421000006	139255074676000.0	93924575.6146	0.12563952153	0.586580891436	0.706901725431	0.9710449328630001	B4DUT8	B4DUT8	CNN2	0.513106375035	0.0243580565174	0.00267723728261	0.056334921706400004	0.403523409459	319.898941482	130.315546596	0.13724931056			0.9955402352570001	ENSG00000064666	0.329529136624	0.365992262641	23.8721671848	202.0	False	True	True	True	False
ENSG00000064703	0.00446536464561	0.07463798783919999	0.19742133881700002	0.0044653559325100005	0.0044658590017899995	0.004465360669459999	0.710078733094	5650250399500.0	24298900.5343	0.09782440702589999	-0.427452145395	0.348612153038	0.881854324507	Q9UHI6	Q9UHI6	DDX20	0.00382074668341	0.021519948152099996	0.0038207466875	0.0716647424357	0.899173816041	1.21254951966	8.42030979846	0.130774079472			0.891466074628	ENSG00000064703	-0.0027679600936100003	-0.0034850512091699998	24.5509072661	202.0	True	False	False	False	False
ENSG00000064933	0.00738931652305	0.0227721807324	0.0073893209358400005	0.0263176714893	0.007389389012439999	0.007389316684299999	0.9213528046230001	3479490586030.0	24872252.2086	0.0749967977447	-1.18910826676	0.103225806452	0.883804665817	P54277-3	P54277	PMS1	0.362450165596	0.00459525023811	0.00459525253957	0.0045952494894099995	0.623764082137	2.10208972045	13.4354135436	0.107913203616			0.927942665732	ENSG00000064933	0.106503094643	0.08599439224130001	24.219225712100002	202.0	True	False	True	False	False
ENSG00000064961	0.00863256084783	0.00313213844873	0.0207945712702	0.00313214668205	0.240212862936	0.0031321406459199996	0.7209635791689999	127258943804.0	2798849.67232	0.127457261842	-1.1207388401	0.11830457614399999	0.577451053934	Q9P0W2	Q9P0W2	HMG20B	0.384472704849	0.184059245177	0.00454661155004	0.00454661023207	0.422374828192	5.502348603300001	22.2903251227	0.105234380273			0.957525122692	ENSG00000064961	0.051000417796599994	0.0704577033895	21.087206086600002	202.0	True	False	False	False	True
ENSG00000064999	0.0133848762056	0.0164783339906	0.0036889624807700003	0.447386447944	0.0036889636643300003	0.0104956147626	0.504876800952	1106742656880.0	12101931.6733	0.0869297894981	-1.0203935374200002	0.144036009002	0.797614582552	Q92625	Q92625	ANKS1A	0.504386532825	0.25257562066	0.0009686500954730001	0.000968650156781	0.241100546262	4.2667789241500005	10.5027114798	0.196674762988			0.909188283867	ENSG00000064999	0.0373257330912	0.0226007348305	23.4573762276	202.0	False	False	True	False	False
ENSG00000065000	0.00810215260585	0.00810215263563	0.00810215260329	0.008102152606319999	0.159460345952	0.00810215260322	0.800028890994	6795445255580.0	34620126.2709	0.07529745741010001	-1.0972183189700002	0.124756189047	0.9136598904809999	O14617-5	O14617	AP3D1	0.534570809171	0.108166623596	0.00346618816339	0.0201901769974	0.333606202072	12.253082208199999	28.9733763598	0.120815753204			0.9690348212200001	ENSG00000065000	0.206493172597	0.166337116926	24.209419046300003	202.0	True	False	True	True	False
ENSG00000065054	0.000768156719795	0.0007681566227649999	0.0007681566251669999	0.45580848155299997	0.0007681566269530001	0.000768156631991	0.540350735221	939217824016.0	5156450.13359	0.187945676961	0.601235762005	0.711027756939	0.6761683294580001	Q15599	Q15599	SLC9A3R2	0.185470158306	0.108284927292	0.00239667825317	0.0023966819952199996	0.701451554154	0.664450188735	4.135136559569999	0.197124841985			0.832145361066	ENSG00000065054	0.265262733847	0.34796921774000006	21.4676833382	202.0	True	False	True	False	False
ENSG00000065057	0.0009451606128410001	0.00094516058783	0.000945160583724	0.42302637548	0.0977598778493	0.0143122978701	0.46206596701700003	285937123334.0	3034620.89005	0.17621011259	-0.0864213161968	0.480345086272	0.591253469357	P78549-2	P78549	NTHL1	0.0689652986357	0.00100541019785	0.670892448244	0.00100541020012	0.258131432722	7.545782873439999	17.7816624618	0.15448267825200002			0.9460154241650001	ENSG00000065057	-0.0742467382512	-0.08396449155659999	21.8852110617	202.0	False	False	False	False	False
ENSG00000065060	0.0035055961568499997	0.00576102218186	0.00246803992088	0.0181033578987	0.00246803990206	0.00246804000356	0.965225903936	206569417584.0	3364475.43567	0.135087651237	-0.744328984317	0.229557389347	0.609331633036	Q6BDS2	Q6BDS2	UHRF1BP1	0.5744301129739999	0.12437920587300001	0.0009457441204460002	0.000945744075035	0.29929919295699997	2.6373830416499997	7.8088768996899995	0.207968724422			0.8847277401260001	ENSG00000065060	0.137175380598	0.128347510119	21.2639629557	202.0	False	False	True	True	False
ENSG00000065135	0.0041334008921900004	0.0402548620412	0.0041334015298	0.00413340121535	0.08621144453410001	0.016605427503299998	0.844528062284	1547703731640.0	11584004.5217	0.107395280457	-0.43361881781000006	0.345911477869	0.791613532368	P08754	P08754	GNAI3	0.24948197368	0.362792387851	0.0024150402976599998	0.11699113440600001	0.268319463766	25.2317650416	40.8569199763	0.12294424150399999			0.9795902469419999	ENSG00000065135	-0.0822019836177	-0.0791558943897	23.881245015799998	202.0	False	False	False	False	False
ENSG00000065150	0.00502421909462	0.005024219236069999	0.00502421910341	0.00502422042355	0.00502421912955	0.00502421899817	0.969854684015	381185576607000.0	207728687.96	0.0939878579012	-0.468971114751	0.33263315829	0.989498162178	O00410	O00410	IPO5	0.22483540371599997	0.501185554713	0.0017820165149000002	0.0017820165142799999	0.270415008542	134.983368836	85.7486241024	0.135491787149			0.991820518813	ENSG00000065150	0.212444892821	0.19919293694499998	26.3206766552	202.0	False	False	False	False	False
ENSG00000065154	0.00136751268794	0.0013675137821300002	0.00136751298449	0.00136751454795	0.0590566390624	0.00894618359083	0.926527123344	102715923202000.0	52020726.3574	0.194824008663	1.82952963068	0.9163540885220001	0.9426899707449999	P04181	P04181	OAT	0.016754055953799998	0.00079035875619	0.0007903562162979999	0.0007903554070580001	0.980874873667	78.65010606220001	31.018355517600003	0.28591101478000003			0.971624990263	ENSG00000065154	0.741909770019	0.629163969271	22.4598062812	202.0	False	False	False	False	False
ENSG00000065183	0.00416358181636	0.00416358193858	0.00416358179844	0.00416358179538	0.12173115242799999	0.00416358184373	0.857450938379	30959395844300.0	51250105.6807	0.10856790895	0.13591238750499998	0.565266316579	0.941339734454	Q9UNX4	Q9UNX4	WDR3	0.109733962252	0.241572204378	0.352354630849	0.0042743453256	0.292064857196	1.41365097329	9.24818200647	0.12856262464			0.899295006621	ENSG00000065183	0.199904146277	0.188129865975	24.9635035881	202.0	False	False	False	False	False
ENSG00000065243	0.0036033700202900004	0.00360337002028	0.00360337002025	0.441640324058	0.0144511156748	0.00360337002024	0.529495080186	1665437756090.0	14060367.5972	0.09178411567320001	-0.7978806373749999	0.21147786946699998	0.816292851249	Q16513	Q16513	PKN2	0.529901242477	0.0208292968828	0.00423919565609	0.0042391956572499995	0.440791069327	1.4130791907	10.6161230487	0.111974029439			0.910103606762	ENSG00000065243	0.151256423666	0.109094813516	23.3551301946	202.0	False	False	False	False	False
ENSG00000065328	0.08053337531600001	0.0007516506945939999	0.329923089825	0.000751650789177	0.030845114565099998	0.0007516508533260001	0.556443467957	80658584593.6	1295361.8562399999	0.219247269738	-0.380387577032	0.36706676669200006	0.425249418648	Q7L590	Q7L590	MCM10	0.0728688636443	0.0347785112783	0.465649373952	0.0276555180785	0.399047733046	2.5709929174	10.946718815499999	0.14647600196399999			0.912693775804	ENSG00000065328	0.20194603999400002	0.442170298671	18.7002039473	202.0	False	False	True	False	False
ENSG00000065357	0.0151719179726	0.00198318611947	0.00198318614199	0.00198318612715	0.0731757318876	0.135877115823	0.7698256759280001	476100271716.0	4687618.82818	0.14719631057600002	-0.19836421590199999	0.43645911477899996	0.662365914035	P23743	P23743	DGKA	0.214547472135	0.00450898190513	0.021535166371400002	0.00450898190371	0.7548993976839999	0.08113257043939999	1.8090751297999998	0.157449401646			0.773876295085	ENSG00000065357	0.381552797875	0.571693587187	21.284006293900003	202.0	False	False	False	False	False
ENSG00000065427	0.007466689705169999	0.007466689616949999	0.007466689536369999	0.0074666895674599994	0.007466689552590001	0.007466689561580001	0.9551998624600001	46740811746600.0	89584029.0919	0.0763163399798	-0.842676241329	0.196624156039	0.969169604681	Q15046	Q15046	KARS	0.117266193223	0.00284329583339	0.19888352721000002	0.0119183072851	0.669088676448	63.8931008762	65.7821632978	0.121511905535			0.988490301472	ENSG00000065427	0.279960071722	0.160494757306	25.4329143069	202.0	True	False	False	False	False
ENSG00000065485	0.0198623365562	0.00469705222471	0.00469705220385	0.00469705219758	0.0046970522063	0.0177195934888	0.943629861123	4506187485540.0	20670930.914	0.10269388716700001	-0.328838536571	0.38777194298600004	0.8637011477009999	Q14554	Q14554	PDIA5	0.172838449699	0.0026192671183	0.0026192672686199997	0.014453771725899999	0.807469244189	1.51299649614	7.914293268200001	0.155419970396			0.885935187349	ENSG00000065485	0.415676254793	0.317172484857	23.2918423137	202.0	False	False	True	False	False
ENSG00000065491	0.0035272926734999997	0.0132864439254	0.00352729255692	0.00352729259601	0.0035272929410500005	0.0035272926261599997	0.969077092681	106511988139.0	2547385.81236	0.128116338998	-1.24894397829	0.0906226556639	0.5604230740380001	Q9NU19	Q9NU19	TBC1D22B	0.2932738034	0.209662722131	0.0027772307892600006	0.00277723075236	0.491509012927	1.8355789509	9.978577215169999	0.13577440621300002			0.905410142557	ENSG00000065491	0.030119905838599997	0.030318925035900002	21.1527566715	202.0	False	False	False	False	False
ENSG00000065518	0.18101510756499997	0.0014653619541500002	0.00146536193845	0.00146536195427	0.058600776608800004	0.00146536202605	0.754522667953	189858653859.0	2432743.4199599996	0.179109611589	-0.34911662207500005	0.378694673668	0.552246643163	O95168-2	O95168	NDUFB4	0.357863707878	0.143912941028	0.0018345450237299999	0.0126041575049	0.483784648565	126.070357212	62.6869510924	0.179113922221			0.987633403443	ENSG00000065518	0.115963951232	0.148148165876	20.3330173679	202.0	True	False	False	False	False
ENSG00000065526	0.059000587078300006	0.00454061438642	0.046299767816900005	0.00454061434855	0.00454061433095	0.00454061542029	0.876537186619	1664306079300.0	12732657.6616	0.101320549685	-0.553422425854	0.299024756189	0.803240567099	Q96T58	Q96T58	SPEN	0.49656338235200004	0.18382577161400002	0.0728450540593	0.000835879028403	0.245929912947	4.04456652876	9.12473126522	0.220402191739			0.898087559399	ENSG00000065526	0.010068122028600001	0.008078333868289999	23.5689166277	202.0	True	False	False	False	False
ENSG00000065534	0.0032840959794000002	0.00328409601778	0.0032840959727500002	0.0575015836426	0.09385570905369998	0.042859758536099996	0.7959306607979999	528200032859.0	6249447.4795699995	0.116294075181	-0.643516694001	0.266466616654	0.704673317831	Q15746-6	Q15746	MYLK	0.468804465601	0.0028842052519899995	0.0724508299581	0.0028842051467600003	0.452976294042	0.126440658129	1.83049897073	0.19425575088599997			0.7747526680689999	ENSG00000065534	0.441224026686	0.41600350197499997	21.9433907456	202.0	True	True	True	True	False
ENSG00000065548	0.006117848799350001	0.00611784857585	0.006117848460489999	0.006117848673729999	0.131938917325	0.012331101955	0.8312585862109999	11908569193200.0	40016987.9718	0.08623536293019998	-0.647410275809	0.264666166542	0.925812017103	Q8WU90	Q8WU90	ZC3H15	0.351382057368	0.124341746001	0.00172625189422	0.0017262518947400002	0.520823692843	41.6594094542	35.4932811452	0.181848785733			0.976123704915	ENSG00000065548	0.2427868432	0.130090176184	24.573220621300003	202.0	False	False	True	False	False
ENSG00000065559	0.0032887111943099997	0.0155600683627	0.00328871103741	0.277144141177	0.00328871103531	0.00328871110085	0.694140946092	740459932523.0	9059073.828119999	0.0949876148329	-0.974095655155	0.156864216054	0.75853274323	P45985	P45985	MAP2K4	0.508001077023	0.0811165252701	0.00497185146743	0.004971851832899999	0.400938694406	1.1825669626200002	10.5275383666	0.103296602652			0.909402508374	ENSG00000065559	0.16587971237	0.227328475351	22.3020158084	202.0	True	False	True	False	False
ENSG00000065613	0.160638012644	0.00295767586293	0.0029576758122399995	0.00295767583687	0.140871728199	0.0236488797841	0.665968351861	8058966087590.0	23325156.9022	0.121706869082	0.193963230473	0.58672168042	0.877578576251	Q9H2G2	Q9H2G2	SLK	0.17219953549400002	0.0206323155963	0.506213582009	0.0319541697421	0.269000397158	3.0993297682999996	10.4236810436	0.16889343942			0.908584560256	ENSG00000065613	0.362777940885	0.289774450651	23.458781926900002	202.0	False	False	False	False	False
ENSG00000065615	0.0971706602593	0.000650517084642	0.000650517087064	0.000650517109035	0.087085535342	0.0277549806653	0.7860372724529999	536335823376.0	2545002.7795599997	0.28775981251	1.08442354386	0.8185296324079999	0.560198034656	Q7L1T6	Q7L1T6	CYB5R4	0.505315784084	0.0199239926271	0.0043455147395800005	0.00434551472491	0.46606919382399997	0.07992597426419999	1.64184929838	0.172191090996			0.76735218509	ENSG00000065615	0.104694367522	0.269645267288	20.8444721987	202.0	False	True	False	False	False
ENSG00000065665	0.000609388736077	0.000609391017988	0.000609388721178	0.000609388832127	0.0006093887241849999	0.00467312669761	0.992279927271	103189311205.0	1315072.13796	0.244268676978	-0.0599374027934	0.490097524381	0.42922511439499994	Q9H9S3-3	Q9H9S3	SEC61A2	0.211763999426	0.108386440296	0.00233291792612	0.120010391817	0.5575062505349999	1.0305090150799998	6.311173044099999	0.160848053472			0.8668302562899999	ENSG00000065665	0.0530396127364	0.108101574824	19.953121786700002	202.0	False	False	True	False	False
ENSG00000065809	0.014326777098399999	0.00042841800017400005	0.152637796635	0.000428417995016	0.276934649646	0.0447439725586	0.5104999680669999	212611411346.0	1874967.4956200002	0.245923223031	0.29491109089	0.620555138785	0.504088215438	Q9H098-2	Q9H098	FAM107B	0.413478580207	0.07168848772900001	0.07360546897039999	0.0588777595669	0.382349703526	0.976489746154	5.48025856344	0.180315389469			0.8548921087479999	ENSG00000065809	0.284425890384	0.7127240627629999	18.8202513248	202.0	False	False	True	False	True
ENSG00000065833	0.0285377521948	0.00110959786451	0.006953258684520001	0.00110954159337	0.488330709824	0.046687317206300004	0.427271822632	1999039563670.0	7359191.50143	0.192123544523	0.900940477507	0.782370592648	0.729352636711	P48163	P48163	ME1	0.36314971859800005	0.00130510269077	0.00130510268682	0.06935563846699999	0.564884437558	0.933361792582	3.9672955634500005	0.24351765493			0.8291656929189999	ENSG00000065833	0.535583200177	0.580007319162	21.4380280892	202.0	False	True	False	False	True
ENSG00000065882	0.0193743642163	0.156010146807	0.00419964622408	0.00419964622432	0.244243992073	0.00614551192289	0.565826692532	98285828425.5	2981960.07902	0.10513410604399999	-1.5963170544	0.0387096774194	0.588703023029	Q86TI0	Q86TI0	TBC1D1	0.49612945594700003	0.0013471298223100001	0.09606671891239998	0.0013471295209200001	0.405109565797	13.8909585132	18.6864516225	0.19945239988299998			0.948605593207	ENSG00000065882	0.197736312357	0.16849141678100002	20.7593955631	202.0	False	False	False	False	True
ENSG00000065883	0.00362497407082	0.003624974084	0.0036249740484499996	0.0036249741049600003	0.00362497411169	0.0036249741262100003	0.978250155454	1384402046140.0	9348462.068880001	0.125860932766	-0.135053471425	0.46369092273100004	0.762733478359	Q14004	Q14004	CDK13	0.31210140845199996	0.0251957022709	0.00416377815727	0.00416377815645	0.654375332963	1.04533927199	9.08672685087	0.11251778134000001			0.8977370102050001	ENSG00000065883	0.0334853339133	0.0349336750595	23.0187586073	202.0	False	False	True	False	False
ENSG00000065911	0.037672254531	0.00174704324753	0.00174704321516	0.0017470432122700002	0.243199117	0.00174704322727	0.712140455567	46134029371500.0	40272715.1856	0.168655218336	1.29119359014	0.852813203301	0.926112069612	P13995	P13995	MTHFD2	0.03502661870169999	0.0318498938364	0.417053213886	0.0606774920297	0.455392781546	102.34617104600001	51.1084369401	0.19794439134300001			0.984420035834	ENSG00000065911	0.539678809093	0.422722765821	22.807790923200002	202.0	False	False	False	False	True
ENSG00000065978	0.00517751518408	0.00517751535427	0.00517751520065	0.00517752294169	0.00517775799656	0.0058440512959700005	0.9682681220270001	87270190511000.0	101077145.86700001	0.09242298520369999	-0.31532317463599996	0.393098274569	0.9732203135549999	P67809	P67809	YBX1	0.431542541039	0.15761024232	0.0028582881638000005	0.0028582881776999997	0.405130640299	9547.66338109	705.025748793	0.13859372609			0.999571550985	ENSG00000065978	0.0772494491555	0.0869561512971	25.7401247585	202.0	True	False	False	False	False
ENSG00000066027	0.00440106369982	0.08980871587989998	0.00440106344738	0.00440106465822	0.169379635273	0.0133833688616	0.7142250881800001	577503177380.0	7245767.599439999	0.104880026555	-0.8547529501119999	0.193173293323	0.7271772560199999	Q15172	Q15172	PPP2R5A	0.16063058645	0.00235314860654	0.00235314860263	0.0023531486025100004	0.832309967738	6.74223219714	17.0134187452	0.152619582551			0.943581054764	ENSG00000066027	0.34206429420900003	0.31111339760400003	21.4913314137	202.0	True	False	False	False	False
ENSG00000066044	0.061472012795	0.00971827750205	0.00490266528886	0.00490266533046	0.0179696495242	0.0763398279948	0.8246949015649999	24009522702900.0	49546781.5873	0.0988954507032	-0.148377130165	0.45746436609200003	0.939839471908	Q15717	Q15717	ELAVL1	0.356409966501	0.00853076470068	0.008530764698399999	0.00853076469844	0.617997739401	3.8109321713199997	24.8935421419	0.07842037452039999			0.962627560957	ENSG00000066044	0.0759644868161	0.10837201515999999	25.059021601199998	202.0	True	False	False	False	False
ENSG00000066084	0.0969512957481	0.0271846136998	0.0735624445456	0.00305644260917	0.47110335962300004	0.00305644181838	0.325085401956	1758923305430.0	11398407.166	0.11635345537399999	-0.212038770288	0.43173293323299994	0.789363138549	Q9P265	Q9P265	DIP2B	0.617654156266	0.118491045818	0.00126108975268	0.00126108974482	0.26133261841899996	2.0904335484	7.56919927298	0.19101533932599998			0.88227389577	ENSG00000066084	0.311930164143	0.256568701586	22.6543614803	202.0	False	True	True	True	True
ENSG00000066117	0.00421806528801	0.11301175087099999	0.00421806533994	0.069579287974	0.00421806528866	0.039565633577699995	0.765189131661	10100968071900.0	31306235.3515	0.10151977658900001	-0.263852099181	0.41260315078800003	0.9053334333509999	Q96GM5	Q96GM5	SMARCD1	0.2729676195	0.35527472101499996	0.16407711236300002	0.017498850641400002	0.190181696481	16.3108989835	44.587674606099995	0.09057829176560002			0.9818882916570001	ENSG00000066117	0.181005284888	0.23705000439100002	23.578848582	202.0	True	False	True	False	False
ENSG00000066135	0.00772760002446	0.0019812007261900003	0.0019807508806500003	0.00198075709125	0.44867506448100003	0.0019807508883	0.535673875908	1243818486460.0	6675124.03091	0.167077959976	0.439991300151	0.666766691673	0.714725076888	O75164	O75164	KDM4A	0.298308367676	0.445209197097	0.00110441805068	0.00110441804459	0.254273599132	20.2540216191	27.438680793200003	0.164018338137			0.9668925761470001	ENSG00000066135	0.0520840962956	0.048240710434	22.4088015337	202.0	True	False	False	False	True
ENSG00000066136	0.015238231591299998	0.0699674278471	0.0039803047789000005	0.00398030478457	0.108890005768	0.00398030475592	0.7939634204739999	1217920408000.0	9877037.46252	0.11173333272500001	-0.434021092397	0.345611402851	0.770009751707	Q13952	Q13952	NFYC	0.256237161057	0.265515906132	0.00423903660187	0.00423903262457	0.469768863584	0.8849202067749999	7.5918001557200006	0.12391026584499999			0.8824881202770001	ENSG00000066136	-0.0011047518651300001	-0.00149819743063	23.2181163678	202.0	True	False	True	False	False
ENSG00000066279	0.0041043139123400005	0.0748373226586	0.141608907326	0.0614873736329	0.148625093414	0.00410431389492	0.565232675161	1412347091620.0	11866716.8304	0.10014750655999999	-0.621568757791	0.274568642161	0.794989123097	Q8IZT6	Q8IZT6	ASPM	0.275354401028	0.0558785273108	0.0764774855977	0.00108230763491	0.591207278429	9.7018598754	14.870462543399999	0.20946092712900002			0.9348173249200001	ENSG00000066279	0.0399412565232	0.024690752639000002	23.3828738786	202.0	False	False	False	False	False
ENSG00000066422	0.0314043951773	0.0017493715280799999	0.00174937151223	0.00174937151372	0.00174937151311	0.0017493715099699998	0.959848747246	75959380317.2	1721460.2799799999	0.160100872999	-1.01556655056	0.145311327832	0.48871052434199996	O95625	O95625	ZBTB11	0.353849101917	0.019834459804900003	0.22632004837699998	0.00270583584867	0.397290554052	0.420268649103	4.32112197776	0.150026152311			0.8358456025550001	ENSG00000066422	0.10328942864900001	0.127029922641	20.388678508399998	202.0	False	False	False	False	False
ENSG00000066455	0.00622515163864	0.00622819423617	0.0062251516437	0.006225152177789999	0.00622515216434	0.0062251527985699995	0.962646045341	1554160328660.0	13750236.9089	0.09066459556989999	-0.841602554365	0.19677419354800002	0.813067286775	Q8TBA6	Q8TBA6	GOLGA5	0.0643038638255	0.0188148714766	0.231953556071	0.00253392932417	0.6823937793029999	4.87963296585	16.3981503223	0.134709652258			0.941283010049	ENSG00000066455	0.271471647176	0.20693041069499998	22.8498522127	202.0	False	False	False	False	False
ENSG00000066557	0.004542576923689999	0.00454257693378	0.00454257693241	0.00454257698176	0.0812571335425	0.00454257696401	0.896029981722	14906267257800.0	37473603.8447	0.10302888277899999	-0.16340567743599999	0.45108777194300004	0.920636111319	Q9H9A6	Q9H9A6	LRRC40	0.299975126899	0.142325547498	0.0035615095096599996	0.0035615094189200003	0.550576306674	9.34667879861	24.3480860903	0.125563620739			0.961731713017	ENSG00000066557	0.20553853204199998	0.202129586464	24.2114342819	202.0	False	True	True	True	False
ENSG00000066583	0.0407310557187	0.0013399692141900003	0.00133996921053	0.00133996924256	0.00133996922123	0.0013399692139	0.952569098179	3821796806640.0	11670642.552000001	0.167509340548	0.8531302090780001	0.773368342086	0.79266371615	Q96CN7	Q96CN7	ISOC1	0.5403689599229999	0.0024752639633699998	0.00247526421868	0.00247526289654	0.452205248998	9.71627413258	21.5156687746	0.144875527354			0.9559087014100001	ENSG00000066583	0.389626432523	0.473080051826	21.32764486	202.0	False	False	True	True	False
ENSG00000066629	0.0008713036296	0.00087130363098	0.0008713036291819998	0.0008713036446450001	0.0260748396502	0.07561266319400001	0.894827282621	2977254951780.0	6432851.19466	0.268228244816	1.7848881140200001	0.912078019505	0.708649013577	F8W717	F8W717	EML1	0.154101109551	0.12448172061599999	0.0006867749437149999	0.000686774990077	0.7200436199	1.9117057045099997	4.28236614251	0.32286927708200003			0.835125029212	ENSG00000066629	0.5572353994929999	0.49465133505099995	21.435651434500002	202.0	False	False	False	False	False
ENSG00000066651	0.0026556688450599998	0.0026556687454599996	0.00265566878486	0.0026556687621300005	0.0026556688805500005	0.00265566927348	0.984065986708	724431585468.0	6881920.8582	0.123677020686	-0.409230220039	0.354163540885	0.719225864526	Q7Z4G4-2	Q7Z4G4	TRMT11	0.007116480311790001	0.0026595152754699996	0.102815506271	0.0026595283298200003	0.8847489698119999	3.4248715187800003	13.009071649400001	0.14225771753			0.925352496689	ENSG00000066651	0.173892938917	0.192489359374	21.953071166599997	202.0	False	False	True	True	False
ENSG00000066654	0.0419313858476	0.0021850936512199997	0.00218509195564	0.250699778429	0.130901809646	0.00218509168523	0.569911748785	10404549226600.0	26447554.4998	0.121962442686	0.228120215062	0.59632408102	0.8896556897460001	Q9NXG2	Q9NXG2	THUMPD1	0.34131898256	0.0186851604093	0.306256534899	0.004912759077569999	0.328826563055	4.11945950087	22.157975745500003	0.09159885314260001			0.9573108981849999	ENSG00000066654	0.10178741267300001	0.130992415674	24.0434401248	202.0	False	True	True	True	False
ENSG00000066739	0.0035703360533699997	0.00357033604222	0.00357033611867	0.226489604276	0.0035703360418800002	0.00357033603671	0.7556587154309999	294003123438.0	5329395.8877	0.101741465661	-1.1410699285700001	0.114028507127	0.681494261496	Q96BY7	Q96BY7	ATG2B	0.347464112983	0.0039689261329800005	0.00396892755344	0.003968925356	0.640629107974	0.185118509854	3.08663328704	0.139392654129			0.810391836099	ENSG00000066739	0.293750790724	0.322312399061	21.6819537972	202.0	False	False	False	False	False
ENSG00000066777	0.00380276853328	0.09826724977229999	0.0038027662061799997	0.047858719507099995	0.08561938493139999	0.00918137599008	0.75146773506	27444082194900.0	49946356.5116	0.104886729287	0.025004203390599996	0.523930982746	0.940064511289	Q9Y6D6	Q9Y6D6	ARFGEF1	0.49353408889	0.0348003090076	0.0009028224834169999	0.0009028224470280001	0.469859957172	16.1823007823	18.5216515154	0.217190300351			0.948196619148	ENSG00000066777	0.38367733834299994	0.233497216547	24.573720811199998	202.0	False	True	True	True	False
ENSG00000066855	0.09012190669220001	0.00103895462572	0.00103895465866	0.035966533506199994	0.0010389546542100001	0.046881472677800004	0.8239132231849999	51352330184.5	1093029.59965	0.207323319872	-0.6237385850689999	0.273818454614	0.386917710599	Q15390	Q15390	MTFR1	0.176093842141	0.0032170461247200003	0.00321704612411	0.0032170461557600003	0.814255019455	2.04239676175	10.9860523645	0.130085350628			0.912908000312	ENSG00000066855	-0.0329193417268	-0.055622754917299996	20.209524107100002	202.0	False	False	False	False	False
ENSG00000066926	0.055164855984800004	0.043706836738800006	0.00278038080267	0.0027803807686799997	0.12291592502	0.0418480406089	0.730803580076	1323035750670.0	8657811.95593	0.13285491962	-0.0459446739915	0.496174043511	0.7520066011550001	P22830	P22830	FECH	0.31534159417	0.015331582649100001	0.401685338384	0.013158265057899998	0.254483219739	2.45864390563	7.18696766945	0.218173563534			0.877697281296	ENSG00000066926	0.289380005367	0.197161144051	22.4195422967	202.0	False	False	True	True	False
ENSG00000067057	0.0467464560259	0.00183509453707	0.0018350943553	0.0018350969966099999	0.426512123578	0.00183509506035	0.519401039446	97151832722000.0	69301442.0776	0.14222738562	0.979689598161	0.798124531133	0.957917635586	Q01813	Q01813	PFKP	0.422849603185	0.17933030438	0.0017280285505000001	0.0017280288253099998	0.39436403505900003	19.1101299904	27.660428447399998	0.158042145844			0.967184700475	ENSG00000067057	0.564041568505	0.5339600314549999	23.4460754298	202.0	False	False	False	False	True
ENSG00000067064	0.0013676766371199997	0.043479798458699995	0.00136767662794	0.00136767681753	0.030410085985099998	0.0013676770777800002	0.920639408396	13716913196100.0	21557146.989	0.171805440422	1.168845382	0.832933233308	0.8685019878479999	Q13907-2	Q13907	IDI1	0.193126914445	0.000941544376847	0.0012755416804200001	0.14628722398900001	0.658368775509	30.032932125	24.3951968037	0.224643853974			0.961751187972	ENSG00000067064	0.235720085556	0.21241221905699997	23.3274341194	202.0	False	False	False	False	False
ENSG00000067141	0.00139564485635	0.00139564485907	0.00139564485652	0.00139564486073	0.00139564486618	0.00139564486631	0.991626130835	393050888080.0	3100096.08193	0.202231701899	0.334454349761	0.633233308327	0.5958292701219999	Q92859-4	Q92859	NEO1	0.232528586354	0.248015349768	0.00128008861699	0.00128008861696	0.516895886644	9.425180083210002	16.4915672066	0.186158512248			0.941730934019	ENSG00000067141	0.089156904146	0.128918230522	21.0016145289	202.0	False	False	False	False	False
ENSG00000067225	0.11317887791799999	0.000855884994265	0.000855885430341	0.0008559367835039999	0.170129817284	0.0527367270873	0.661386870503	7957060882600000.0	468846213.112	0.190259314636	1.1730541411700002	0.833533383346	0.997149501163	P14618	P14618	PKM	0.438413295426	0.000987514246016	0.000987514256283	0.153962251002	0.40564942507	761.9344304839999	140.652298366	0.196251039707			0.995988159227	ENSG00000067225	0.485300227352	0.511795457692	25.121303878699997	202.0	False	False	False	False	False
ENSG00000067334	0.004750445045	0.004750455269409999	0.0047504450523299995	0.0926210918338	0.00475045196942	0.00475044568776	0.8836266651420001	9754553572150.0	31115597.3559	0.100374999505	-0.298141547496	0.400075018755	0.904883354587	Q5QJE6	Q5QJE6	DNTTIP2	0.25695326204700003	0.00299467790904	0.126205088713	0.0029946782689899997	0.610852293062	5.8362182883300004	17.8698607978	0.135190008117			0.9463659733580001	ENSG00000067334	0.11153428297199999	0.08819049527889998	24.5126402438	202.0	True	False	True	False	False
ENSG00000067369	0.0824238458655	0.018967831442900002	0.0018547330520000001	0.061209712506099995	0.05490692558659999	0.0018547331069199999	0.77878221844	126861300383000.0	67881338.1201	0.165925900992	1.42453108776	0.8718679669920001	0.9564923861679999	Q12888	Q12888	TP53BP1	0.114628629301	0.09805382194710001	0.26922498602600003	0.019691114891599998	0.498401447834	4.01896752347	9.20354045436	0.21782229162099997			0.8988665576070001	ENSG00000067369	0.5803281429020001	0.459761807421	24.4635525062	202.0	True	False	False	False	False
ENSG00000067533	0.0035764792795	0.00357510068768	0.00357510070986	0.00357510072609	0.00357510082244	0.0178329187089	0.964290199066	1464395217250.0	10344088.8695	0.116986812442	-0.26530690924600003	0.41207801950499995	0.775785762508	Q9Y3B9	Q9Y3B9	RRP15	0.182053856318	0.116270344045	0.00276714518882	0.0027671451881	0.69614150926	1.43180318469	8.14046014403	0.146991664477			0.888096907377	ENSG00000067533	0.07629266415710001	0.053615596119800005	23.1247541992	202.0	False	False	True	False	False
ENSG00000067560	0.00279248504906	0.0027924850498000004	0.0027924850490500005	0.0027924850492800006	0.0027924850491199997	0.0263007279388	0.959736846815	33511007492700.0	48327796.5559	0.11978343082800001	0.39309588596	0.652138034509	0.938264196234	P61586	P61586	RHOA	0.25509819514000004	0.263034373419	0.18223239691799997	0.051733423603600004	0.24790161091999996	352.78584907699997	205.892040677	0.09122545121189998			0.997507205733	ENSG00000067560	0.0479744739277	0.0607592105273	25.052882991500002	202.0	True	False	False	False	False
ENSG00000067596	0.00246684488297	0.00246684498266	0.0375770288857	0.00246684488317	0.22330181407400002	0.013518440737700001	0.7182021815530001	11232243018100.0	24334988.6654	0.137721611972	0.559851127122	0.700600150038	0.881929337634	Q14562	Q14562	DHX8	0.529137014773	0.37386471662	0.0013789070414000001	0.00137890704106	0.0942404545247	1.7554469985299999	8.45385346635	0.156725312688			0.891777673911	ENSG00000067596	0.09645409408880001	0.101335427574	24.1894626717	202.0	True	False	False	False	True
ENSG00000067606	0.000661623743972	0.0006616234905489999	0.447017037183	0.0006616235339019999	0.130444848455	0.000661623528143	0.41989162006499997	284934914284.0	2803547.67502	0.19039909879900002	0.039690574276099996	0.5295573893469999	0.577976145826	Q05513	Q05513	PRKCZ	0.157974207871	0.0068296890786999995	0.522369790314	0.00209638155681	0.310729931179	0.618766687007	6.04300135791	0.130169959665			0.863091064891	ENSG00000067606	-0.0037954109490300003	-0.009183889058940001	21.4233377804	202.0	True	False	True	False	False
ENSG00000067704	0.048540536846500004	0.00441691214728	0.00441691217017	0.004416919507020001	0.191180465663	0.00441691213371	0.742611341532	24738564434000.0	49510387.6292	0.100459478774	-0.103432269196	0.475693923481	0.9397644587799999	Q9NSE4	Q9NSE4	IARS2	0.206819498061	0.259648736405	0.309882540477	0.00162551750999	0.22202370754700002	30.092119194499997	42.673076918	0.128550102761			0.9807782192100001	ENSG00000067704	0.230047966875	0.222636819487	24.362806817800003	202.0	False	False	False	False	False
ENSG00000067715	0.018485220431400003	0.0773540738995	0.000609961222381	0.000609961231874	0.09142912840369999	0.138543499621	0.672968155191	4376107829440.0	7920682.414039999	0.264107909156	1.8646097388	0.918829707427	0.7400795139149999	P21579	P21579	SYT1	0.0005844461733080001	0.00573914897578	0.298405321146	0.0252733912175	0.669997692487	7.88941663269	8.858031619010001	0.317091952005			0.895828464595	ENSG00000067715	0.444852514514	0.45526807951700005	21.4109574946	202.0	False	False	False	False	False
ENSG00000067829	0.0017471377285099999	0.0636162883275	0.00174713773581	0.05019708460419999	0.0021542558885	0.104068118093	0.776469977622	514444069604.0	4446738.93135	0.16129743080199999	0.008813003154760001	0.516129032258	0.654489535669	P51553	P51553	IDH3G	0.38725792667099995	0.00295342593086	0.0029594451196799996	0.00295342549718	0.603875776782	3.49579483942	11.922429033599999	0.15682244565300002			0.918458362546	ENSG00000067829	0.203143053292	0.262645554213	21.092568723499998	202.0	False	False	False	False	False
ENSG00000067900	0.007713845299399999	0.00583482016321	0.00583482016292	0.00583482038563	0.00583482114796	0.00583482017718	0.9631120526639999	8720117143160.0	35232709.3399	0.08381372032250001	-0.782054386136	0.217479369842	0.915535218663	Q13464	Q13464	ROCK1	0.0400252476048	0.005406568946939999	0.780723492774	0.00102920495271	0.17281548572099997	3.0348117902599996	13.638760299000001	0.12772943308			0.929130638	ENSG00000067900	0.201843396151	0.09791520869380001	24.7024394477	202.0	False	False	False	False	False
ENSG00000067955	0.00139258203289	0.02543928135	0.0013925821326799999	0.427917685604	0.00139258203953	0.00139258190828	0.541072704933	722069887072.0	5754000.97573	0.14767932058299998	-0.00818630223574	0.509977494374	0.692371164954	Q13951	Q13951	CBFB	0.33778250337899995	0.013266432168199999	0.00273273083392	0.00273273081083	0.643485602808	3.23464459254	12.0546297428	0.149196765886			0.919315260575	ENSG00000067955	0.297839267034	0.333694970394	21.2028746554	202.0	True	False	False	False	False
ENSG00000067992	0.33658963044	0.015904923664799998	0.000965138398576	0.0009651383986219999	0.17962496917399998	0.0009651384704489999	0.46498506145400004	1595184818890.0	5998947.047590001	0.210537991483	1.04303434681	0.8099024756190001	0.6985972545199999	Q15120	Q15120	PDK3	0.30392917722199997	0.00037943554744000003	0.00037943592752699994	0.37475977544699995	0.320552175856	12.81442195	9.44587774225	0.37897205776500004			0.900775103217	ENSG00000067992	0.7281114053319999	0.5727865747909999	20.6054466973	202.0	False	False	False	False	False
ENSG00000068024	0.00132905235972	0.0773078491073	0.00227557137398	0.0253689250886	0.0013290542883200001	0.0013290519521900002	0.8910604958299999	30853229543.2	946625.4605360001	0.185554774661	-1.0320349356999998	0.14096024006	0.35331182956999996	P56524	P56524	HDAC4	0.47543125586	0.09483104885780001	0.00313120507358	0.00313120476678	0.423475285442	0.138678897251	2.21117967926	0.168415149535			0.787041364805	ENSG00000068024	0.167545959667	0.320823750019	19.2731329285	202.0	True	False	False	False	False
ENSG00000068097	0.176950661036	0.00124853374365	0.00124853372097	0.0012485356833299998	0.0012485339041500001	0.00124853406074	0.816806667851	735350911788.0	4609735.952330001	0.186024980678	0.45922004340499994	0.671717929482	0.659890480834	Q6AI08	Q6AI08	HEATR6	0.288101071058	0.44273578453	0.0015096292796199999	0.00150947646002	0.266144038672	1.6305332856799999	7.3436419826499995	0.17388148417500002			0.879605826907	ENSG00000068097	0.229317123583	0.309106032771	21.1584520332	202.0	False	False	True	False	False
ENSG00000068120	0.0491534049697	0.00137356580021	0.00137356581868	0.100937609578	0.0013735657513399998	0.00796946681901	0.8378188212630001	478505510198.0	4050540.11795	0.170777453608	0.082383098365	0.545686421605	0.637986647663	Q13057-2	Q13057	COASY	0.436915564723	0.00455331382826	0.121030848991	0.00384274107042	0.433657531388	4.0554866257899995	18.1509807658	0.110948488542			0.947106021656	ENSG00000068120	0.059063964257300004	0.08528650770549999	21.5273575493	202.0	False	False	True	False	False
ENSG00000068323	0.169223148827	0.00129751610939	0.014645134301400001	0.00129751613778	0.00868687005554	0.09395257507989999	0.710897239489	396237396815.0	3171607.97083	0.19847153575800003	0.30454223534200003	0.624306076519	0.600405070887	P19532	P19532	TFE3	0.244295233616	0.192786413654	0.000570168586211	0.0919022251774	0.470445958966	11.1201806349	9.34745677912	0.356748746017			0.9001324296950001	ENSG00000068323	0.356428323189	0.423916898051	20.1361056949	202.0	False	False	False	False	False
ENSG00000068366	0.244870906029	0.00406117016725	0.00209785921131	0.0020978591250100003	0.18033834914900002	0.09474349695499999	0.471790359364	60507181177400.0	53542112.2822	0.14528071216	0.994749440054	0.8018004501129999	0.944040207036	O60488-2	O60488	ACSL4	0.0905303563882	0.014663292558500001	0.0005394834747580001	0.30520790878000004	0.589058958799	35.3871716586	20.330296109200003	0.292603301629			0.953338007323	ENSG00000068366	0.643040120293	0.37242206971999997	24.0198947238	202.0	False	False	False	False	False
ENSG00000068394	0.00437498058967	0.07589604547389998	0.00437498058696	0.0122154576291	0.0043749805833	0.029815596785499998	0.868947958352	2034054354100.0	13041381.8062	0.109359789916	-0.322196983687	0.390322580645	0.806166079064	Q92917	Q92917	GPKOW	0.43948098796400004	0.20136808673700002	0.00329105140871	0.00329105140741	0.352568822484	2.05956335095	9.59957598544	0.14949804966900002			0.9023136246789999	ENSG00000068394	0.19436626088199999	0.167061435565	23.0646976911	202.0	False	False	False	False	False
ENSG00000068400	0.0011237028315899998	0.0114645410342	0.00112370283185	0.0011237029855199999	0.160528520557	0.0461588662146	0.7784769635459999	32081924079500.0	17863107.7861	0.317083165075	2.86590538035	0.9735933983499999	0.845322931513	Q4V328	Q4V328	GRIPAP1	0.183473291384	0.0547784947369	0.0025022444170700003	0.0351074307758	0.724138538686	2.09551446507	7.59915739121	0.190493381857			0.882566020098	ENSG00000068400	0.295985858883	0.378095183736	22.863385854	202.0	True	False	False	False	False
ENSG00000068438	0.0036505743152099998	0.0296504452065	0.00365057442898	0.00365057431622	0.0432569301968	0.0036505743121799995	0.9124903272239999	91652258489.8	2677628.62473	0.113063192318	-1.5324045957299999	0.0461365341335	0.570474833096	Q9UET6-2	Q9UET6	FTSJ1	0.333594857779	0.10283723879699999	0.0900999048956	0.0030107716067900004	0.470457226922	1.6445948176299998	7.779117546779999	0.16485386162000001			0.884396665888	ENSG00000068438	0.188024773148	0.334767044598	20.2512836033	202.0	False	False	False	False	False
ENSG00000068489	0.00193745751563	0.00193745729245	0.00193745679815	0.0691986965293	0.00193745712634	0.00471449582862	0.918336978909	221316218434.0	3096231.40751	0.15194038018300002	-0.491876715503	0.32273068267099997	0.5956042307399999	Q96HE9	Q96HE9	PRR11	0.06603313606380001	0.00187613092615	0.8376480733280001	0.00036069508017400005	0.09408196460149999	32.125295202	29.7730469081	0.19037077674400002			0.970183843577	ENSG00000068489	0.0673701927834	0.05221493097490001	21.2653997635	202.0	False	False	False	False	False
ENSG00000068650	0.0644086362081	0.0008307612413689999	0.0323135569668	0.0008307608321989999	0.0008307616078310001	0.000830760834797	0.8999547623090001	1270833134950.0	3842068.83256	0.293412845877	1.60298230127	0.892948237059	0.629510164279	E9PEJ6	E9PEJ6	ATP11A	0.598906868547	0.0006181933410820001	0.000618193345357	0.0006181930889759999	0.399238551677	9.22001991232	8.790645369260002	0.34541816231600003			0.895322115759	ENSG00000068650	0.351116421743	0.301419031275	20.8964192116	202.0	False	False	False	False	False
ENSG00000068654	0.007096381008989999	0.0301644237059	0.00709637661025	0.00709637690101	0.007096408837270001	0.00709637843686	0.9343536545000001	12455729068100.0	44579192.5377	0.0791684931124	-0.840679036433	0.19714928732200002	0.933913434851	O95602	O95602	POLR1A	0.384853856781	0.322698314547	0.00162789880369	0.0016278987746099999	0.289192031093	1.86660327781	8.33315838245	0.16395187050100002			0.890550751733	ENSG00000068654	0.215520294705	0.113115117088	25.0375322397	202.0	True	False	False	False	False
ENSG00000068784	0.00394867500592	0.00394867500028	0.0039486750004	0.00394867500292	0.32388549685400003	0.0917919645864	0.56852783855	3722905058630.0	17566827.4739	0.109836742546	-0.20020064031100002	0.435708927232	0.8437476558399999	Q8N5C6	Q8N5C6	SRBD1	0.293736175081	0.181253785957	0.320408448507	0.00209624258327	0.202505347872	1.0156236922700002	8.30436845173	0.121355594417			0.89027810236	ENSG00000068784	0.0616225897755	0.0626254124087	23.856065702600002	202.0	False	False	False	False	True
ENSG00000068793	0.17352298931200003	0.00242679836772	0.0024267983072800005	0.208356204891	0.0988430994061	0.0024267987015800002	0.511997311014	4540149397070.0	18212302.5507	0.11699578495400001	-0.0027094146800699997	0.511777944486	0.8483234566050001	Q7L576	Q7L576	CYFIP1	0.637540251823	0.0012019646322099999	0.00120196455996	0.00120196485806	0.358853854127	12.9777868599	14.8420099616	0.242721138139			0.9347004751890001	ENSG00000068793	0.34825902618	0.244208048563	23.149902793600003	202.0	True	False	True	False	False
ENSG00000068796	0.014120391864799998	0.014120392923600001	0.0141203955097	0.014120392776299999	0.312065412077	0.040091253866300004	0.591361760983	4467221362020.0	36008955.247	0.0586959607465	-1.8023137954599997	0.022355588897199997	0.917035481209	O00139-1	O00139	KIF2A	0.43302894426399996	0.30584510856400005	0.000691375460359	0.000691375447794	0.259743196264	16.691753749300002	20.7967011729	0.19645203549000004			0.9544286048139999	ENSG00000068796	0.0441910194043	0.017929606964200002	25.019069104299998	202.0	False	False	False	False	True
ENSG00000068831	0.0325324187493	0.000877144685465	0.000877144360533	0.0008771437428560001	0.0032927392540300004	0.0008771438773400001	0.9606662653299999	173197678334.0	1753643.8845400002	0.23731742532699998	0.13647191023	0.565941485371	0.491861075688	Q7LDG7	Q7LDG7	RASGRP2	0.07354339171539999	0.0017289552607300002	0.0765867918629	0.0017289552297300001	0.846411905931	0.323630656869	2.45731753024	0.231506691523			0.7935070499339999	ENSG00000068831	0.293611147169	0.399111779692	19.9621156436	202.0	False	False	False	False	False
ENSG00000068878	0.007037903508220001	0.00220115133015	0.00220115194874	0.185933039727	0.0656337151768	0.00220114953748	0.7347918887710001	12867241363900.0	26419872.9418	0.135772557612	0.537391894749	0.693848462116	0.8895056634909999	Q14997	Q14997	PSME4	0.621769889476	0.0210742641248	0.00140608903742	0.042129299452	0.31362045791	14.3142531393	20.9743057267	0.18038347639400001			0.954876528784	ENSG00000068878	0.37612924851400004	0.337536126097	23.123278365900003	202.0	False	True	True	True	False
ENSG00000068885	0.0017778879616600002	0.0017778890908300002	0.00177788797567	0.45695411361999994	0.0885209216092	0.0017778888356400002	0.447413410907	323199739683.0	4706297.1221199995	0.120797002918	-0.7645405117470001	0.22288072018000002	0.663491110944	Q9P2H3-3	Q9P2H3	IFT80	0.19031235664700002	0.0826335369694	0.09674854568749999	0.0037948389325100002	0.626510721764	0.211016070393	3.32172071926	0.138291233442			0.815435849498	ENSG00000068885	0.136673097405	0.153274028722	21.8138555597	202.0	True	False	False	False	False
ENSG00000068912	0.0034732121833100003	0.0034732121799400002	0.00347321218004	0.0034732121821900003	0.17211904620700003	0.00347321218362	0.8105148928839999	259621638805.0	4688491.73687	0.108676911724	-1.07356569213	0.129932483121	0.6625159402899999	Q96DZ1	Q96DZ1	ERLEC1	0.145500955502	0.00336333472718	0.0033633347241500003	0.0434044484149	0.8043679266320001	5.41207118918	19.173921107	0.121330731008			0.9502609644	ENSG00000068912	0.130464876791	0.138194769122	21.5516247924	202.0	True	False	False	False	False
ENSG00000068976	0.0130119613679	0.000935268936877	0.000935268936986	0.0009352689421439999	0.264880827242	0.000935268938176	0.718366135636	571917340557.0	3520878.7831	0.21479074228199999	0.635434132602	0.7192048012000001	0.616532893256	P11217	P11217	PYGM	0.41012873916500003	0.0191140644362	0.000889558474116	0.000889558473627	0.568978079451	0.623266549835	2.48685100808	0.317458633871			0.794558697515	ENSG00000068976	0.606197053888	0.546310539092	20.7682417558	202.0	False	False	False	False	True
ENSG00000069248	0.00889176912754	0.062246829059300006	0.00889176922202	0.0088917693714	0.00889176912845	0.00889177226875	0.8932943218230001	26681899788800.0	70797502.5527	0.0729609426722	-0.945655817876	0.165041260315	0.958592753732	Q8WUM0	Q8WUM0	NUP133	0.441375043236	0.38190045232600006	0.0017632262591	0.00176322625428	0.17319805192499999	12.4187335004	26.9732231784	0.130648915164			0.966055153073	ENSG00000069248	0.0822646439182	0.0539523449694	25.81262571	202.0	True	False	True	False	False
ENSG00000069275	0.057892429163800004	0.0019401426509100001	0.00194014275231	0.0019401497348800001	0.0019401465902699998	0.0019401437840399999	0.932406845324	40590400108900.0	45121752.1377	0.141197078421	0.83481588536	0.76976744186	0.934738579251	Q9H1E3	Q9H1E3	NUCKS1	0.09769098992809999	0.0493443427681	0.248700957049	0.0034010710737300003	0.600862639181	320.936890651	182.367767952	0.0982339794561			0.9970203318529999	ENSG00000069275	0.118364121168	0.164516573202	24.1998623944	202.0	False	False	False	False	False
ENSG00000069329	0.00719659689874	0.00719659829534	0.0071965961499200004	0.087054757024	0.007196596149649999	0.0140523491324	0.8701065063500001	9046433895270.0	40459997.856	0.074338338745	-1.07032066196	0.130907726932	0.9265621483759999	Q96QK1	Q96QK1	VPS35	0.292246550235	0.0101011357043	0.00616569983856	0.09033938639450001	0.601147227828	1.33837722677	12.5683102131	0.0920475805458			0.9225481031389999	ENSG00000069329	0.0777553333704	0.07618328001239999	24.994499330300002	202.0	True	False	False	False	False
ENSG00000069345	0.005990332035130001	0.02978427588	0.00599033208568	0.0059903320270000004	0.00599033217711	0.0353347134032	0.9109196823919999	40445676897700.0	72309265.3464	0.08795126796080001	-0.406869739964	0.35566391597900004	0.959417898132	O60884	O60884	DNAJA2	0.17242141524399998	0.109150993473	0.0019829309049	0.0586525900832	0.657792070295	28.858006006999997	29.0540440332	0.184895597045			0.969190620862	ENSG00000069345	0.517958595044	0.378843316148	24.2388956357	202.0	True	False	False	False	False
ENSG00000069849	0.019881501756099998	0.0020908468190899998	0.00209084682914	0.00209084678589	0.00209084683933	0.00209084680666	0.969664264164	15455888097700.0	28123039.8038	0.13979277331599999	0.635654388688	0.719279819955	0.895881779311	P54709	P54709	ATP1B3	0.24132700700800003	0.00427740434825	0.0042774043513599995	0.00427740435221	0.7458407799410001	91.5380626469	92.2175083409	0.10374984931299999			0.992696891797	ENSG00000069849	0.166677544102	0.231123924368	23.185870402	202.0	False	False	True	False	False
ENSG00000069869	0.000952934712369	0.045232855814500005	0.0009529347271419999	0.147222142423	0.0009529348118660001	0.0749492795905	0.7297369179209999	231353417792.0	2048890.44289	0.23475736337699998	0.2268205594	0.595873968492	0.52066611657	P46934-4	P46934	NEDD4	0.30091201781	0.0688405948754	0.0013968945993800001	0.0013968932746500002	0.627453599441	0.225495749458	1.3209437430600002	0.359488380792			0.7527459686839999	ENSG00000069869	0.446896283053	0.565529291544	20.2238633409	202.0	True	False	True	False	False
ENSG00000069956	0.0821861738931	0.000678337531052	0.00067833748611	0.144475825817	0.0006783375673580001	0.000678337679076	0.770624650026	436570368076.0	3022810.04065	0.21858294418000002	0.530939264157	0.691597899475	0.590653364339	Q16659	Q16659	MAPK6	0.38093008228	0.27362630902	0.00253711047901	0.00253711047765	0.34036938774400005	33.3992094898	46.506006745200004	0.124267924145			0.98264781491	ENSG00000069956	0.104487738639	0.20815487179900002	20.3539091978	202.0	False	False	True	False	False
ENSG00000069974	0.00131432357735	0.0013143244921700002	0.00131432369832	0.00131432345569	0.20255147237999999	0.0013143430016899999	0.790876889395	64200994258.1	1345274.8055200002	0.188347503537	-0.793546568654	0.213128282071	0.433950941415	P51159	P51159	RAB27A	0.22438154087499998	0.0515380617526	0.0026393714793000005	0.0190335719675	0.702407453926	0.09896592547380001	1.38581851769	0.227005555056			0.75609566098	ENSG00000069974	0.448703038951	0.654411437277	19.5048163975	202.0	True	False	False	False	True
ENSG00000069998	0.00208642168725	0.017247013126299997	0.00208642169737	0.00208642191377	0.530035404224	0.0020864216826600003	0.444371895669	6263487491840.0	16497698.5536	0.151699707478	0.706641980963	0.737509377344	0.835871277474	Q9BXW7-2	Q9BXW7	CECR5	0.36732202850400003	0.212348580801	0.102241035688	0.023149268207	0.29493908679999997	4.91590944929	13.7433629933	0.161327691722			0.929598036925	ENSG00000069998	0.41336735132200003	0.47206072563699997	22.1233197628	202.0	False	True	False	False	True
ENSG00000070010	0.004988291798840001	0.00643236301015	0.00498829180029	0.00498829664259	0.0049882998261199995	0.0049882920382	0.968626164884	1325865198340.0	11444650.7966	0.100611387853	-0.629017880357	0.27231807952	0.7899632435680001	Q92890	Q92890	UFD1L	0.173245301916	0.010538184713600001	0.36546502108900003	0.00198149725788	0.44876999502400006	0.7978748164239999	5.811482852490001	0.153702318307			0.859643997819	ENSG00000070010	0.08625251429689999	0.0649372370255	23.2437921827	202.0	True	False	False	False	False
ENSG00000070047	0.0044069657694200005	0.00440696553591	0.00440696561721	0.00440696587877	0.00440696954683	0.0390347216145	0.9389304460369999	261159489052.0	5019556.13363	0.101809332445	-1.19290064813	0.102250562641	0.672867751857	E9PJ24	E9PJ24	PHRF1	0.318150653559	0.0048755091963	0.00487550918282	0.00487550916702	0.667222818895	1.8427942990200001	12.401075840999999	0.109465954048			0.921574355379	ENSG00000070047	0.146779661126	0.136770645494	21.731993267199996	202.0	False	False	False	False	False
ENSG00000070061	0.00534649816783	0.00534649754602	0.005346498207310001	0.005346498286850001	0.005346497984020001	0.005346497641050001	0.967921012167	9544847068760.0	34420464.5677	0.0897568824154	-0.592378520043	0.284696174044	0.9129847723350001	O95163	O95163	IKBKAP	0.376787225595	0.320521068734	0.00183263491714	0.0018326349504100001	0.299026435803	3.6180146458899998	13.6041295259	0.139818423839			0.9289748383580001	ENSG00000070061	0.0981200303469	0.08319943083110001	24.6990773704	202.0	True	False	True	True	False
ENSG00000070087	0.062389248757	0.00179892229078	0.0017989222902400001	0.00179892235346	0.0017989223451900002	0.0047540766782600006	0.9256609852850001	30148758686500.0	38523316.7063	0.142531562699	0.784965892331	0.75791447862	0.923186557648	G5E9Q6	G5E9Q6	PFN2	0.438505293412	0.0059770221857	0.216192994395	0.00403631843641	0.335288371571	134.96472447899998	76.2358006328	0.152388140825			0.990418322038	ENSG00000070087	0.202619076782	0.233132320019	23.7117487223	202.0	True	False	False	False	False
ENSG00000070214	0.0071331043877700005	0.0007682543736789999	0.103894011769	0.294390073214	0.0007682543766639999	0.000768254465104	0.592278047414	340471124460.0	3243301.89893	0.179908948876	0.0447219704562	0.531657914479	0.604305753507	Q8WWI5-3	Q8WWI5	SLC44A1	0.326765439468	0.0796102208931	0.14385125667600002	0.00207823724854	0.44769484571400003	5.14033936241	15.626593227899999	0.145088031576			0.938361766768	ENSG00000070214	-0.026442523106900002	-0.0359510976647	21.7934126854	202.0	False	False	False	False	False
ENSG00000070366	0.00250346325904	0.0201278283543	0.0025034633024699996	0.166408096449	0.15449306002399998	0.00250346326817	0.651460625343	1897398615230.0	8981667.86478	0.153363601427	0.400599286984	0.654838709677	0.757482559448	Q86US8	Q86US8	SMG6	0.287477011784	0.49647470894699997	0.00366086608467	0.00366086608043	0.20872654710400002	0.295027259759	4.80724544399	0.112988638702			0.8444340578020001	ENSG00000070366	0.136009491404	0.14871163537	22.693957682199997	202.0	True	False	False	False	False
ENSG00000070367	0.00814031794614	0.00814031795256	0.00814031825657	0.008140318914579999	0.00814031821207	0.00814032155875	0.9511580871590001	1051957333450.0	14227228.34	0.0720906200651	-1.4904722273500002	0.0525881470368	0.8176430875399999	O00471	O00471	EXOC5	0.458199031082	0.07342971149380001	0.05557015940190001	0.00238048993488	0.41042060808700004	4.24468828359	15.405208743800001	0.133738150767			0.937407493963	ENSG00000070367	0.185002845482	0.102419496289	23.3428637905	202.0	True	False	False	False	False
ENSG00000070371	0.011790358749500001	0.00012834851032	0.311619814827	0.287654422275	0.000128348518126	0.0179238368832	0.370754870237	3576562210160.0	3893964.08589	0.48566963349799996	3.06715543736	0.979069767442	0.631760558098	P53675	P53675	CLTCL1	0.20219033219799998	0.242222021788	0.0016244144844899998	0.00389386224621	0.550069369283	0.287408170986	2.2918974329700004	0.233913009888			0.789397834385	ENSG00000070371	-0.0331632310558	-0.078694992823	21.962749366700002	202.0	False	False	True	False	False
ENSG00000070423	0.0006815749333470001	0.0006815749504959999	0.0006815751378919999	0.0006815753048180002	0.062031311435699996	0.000681574890401	0.934560813347	345781062703.0	2303055.19319	0.255326714183	0.601859681109	0.7112528132029999	0.541819818468	Q9BV68-2	Q9BV68	RNF126	0.400700071633	0.0412327639365	0.0021691581505100003	0.0021691581508899997	0.553728848129	7.1519194960000005	16.1864206962	0.16521918853599998			0.9406403365270001	ENSG00000070423	0.111714909791	0.170130083547	20.4105137678	202.0	False	False	True	False	False
ENSG00000070476	0.000127299936313	0.000127299818622	0.281477910024	0.0391637749294	0.00012730044478200003	0.09287707476160001	0.586099340085	1517828456290.0	2075547.42438	0.593579213891	2.91636477555	0.9755438859710001	0.522541444753	Q2QGD7	Q2QGD7	ZXDC	0.6414311304	0.004327211467659999	0.0354974850525	0.00432721155126	0.314416961528	0.23563981613600002	3.69029014634	0.131541813212			0.823420581133	ENSG00000070476	-0.11119985294700001	-0.66115475204	22.3716971875	202.0	False	False	True	False	False
ENSG00000070495	0.0023320301556100003	0.012836896201899999	0.00233203013871	0.379586260325	0.0630229909155	0.0888485555399	0.45104123672300006	141862162983.0	3481586.8376599997	0.108182261726	-1.3532530943099998	0.0720180045011	0.6146575650739999	B2WTI3	B2WTI3	JMJD6	0.017714616826400003	0.136464891344	0.00445383382779	0.017011131951	0.8243555260500001	0.13345775742000002	2.3890260901800002	0.152915327354			0.7915790293680001	ENSG00000070495	0.201197513436	0.272669029229	21.2339291228	202.0	False	False	False	False	False
ENSG00000070501	0.006110148986339999	0.062187980214599994	0.0061101489862899995	0.006110148987340001	0.006110148989330001	0.0322325982594	0.881138825577	934135676950.0	11021278.2833	0.08769463226539999	-1.0503314993000001	0.13683420855200001	0.784787337784	P06746	P06746	POLB	0.220194533252	0.0485171520789	0.130853946811	0.00769573735038	0.592738630507	0.6431048753149999	8.55213333963	0.0937705444173			0.89263457194	ENSG00000070501	0.0895025961616	0.120835390667	22.988235573	202.0	True	False	True	False	False
ENSG00000070610	0.00144776190332	0.00144776190038	0.0014477619029900001	0.00466899948024	0.0014477619001900001	0.0516343126362	0.9379056402770001	79859684668.0	1510567.11632	0.18707845269099999	-0.674204142181	0.256489122281	0.459305378441	Q9HCG7	Q9HCG7	GBA2	0.6393892314140001	0.09213081402960001	0.00188906078371	0.0018890607837400001	0.264701832989	8.01881181694	19.209334579500002	0.14741534388900002			0.9503778141310001	ENSG00000070610	0.14270470752999997	0.16898573639000003	19.7794900508	202.0	False	False	True	False	False
ENSG00000070669	0.027531110667599997	0.00103995630903	0.00103995630998	0.26360934910100003	0.285551731924	0.00103995630594	0.42018793938199994	225204753636000.0	85033001.1485	0.176482346459	1.58552054396	0.8907726931730001	0.966844197735	P08243	P08243	ASNS	0.0237782972048	0.000306207713638	0.556604550644	0.00030620771338	0.41900473672399996	173.501400692	43.458073965299995	0.30309656733199997			0.98126509309	ENSG00000070669	0.483586475833	0.31321823136	24.571738856	202.0	False	False	False	False	True
ENSG00000070718	0.0032309806731900003	0.027649300479599997	0.0032309804726900005	0.0032309804311599997	0.0032309804501	0.00323098054166	0.956195796952	164395753368.0	3417853.09153	0.118629283058	-1.10409716144	0.12318079519899999	0.6116570399819999	P53677	P53677	AP3M2	0.323434284707	0.0758180368605	0.243107818385	0.00216180685324	0.355478053194	0.381200670566	3.97633047911	0.155272432185			0.82928254265	ENSG00000070718	0.252260913099	0.312142680319	20.9547665288	202.0	True	True	True	True	False
ENSG00000070756	0.00704538214087	0.0070790862847500005	0.00704538256526	0.0070453845370299995	0.00704538276087	0.007045382621909999	0.9576939990889999	191625891126000.0	175032184.325	0.0790877428652	-0.906465419622	0.177944486122	0.9864226239589999	P11940	P11940	PABPC1	0.215284264505	0.0325320215254	0.606169819763	0.00150823413776	0.144505660069	3771.08105181	497.819321719	0.123356257438			0.9992599517020001	ENSG00000070756	0.0165030942115	0.010111016462299999	27.2824659016	202.0	True	False	False	False	False
ENSG00000070770	0.010858233271600001	0.0108582332714	0.0108582336289	0.095804377959	0.0108582367459	0.010858234908499999	0.849904450215	3645261825200.0	28788141.1901	0.0663209501834	-1.51085379056	0.0494373593398	0.8980571600030001	P19784	P19784	CSNK2A2	0.11258466580700001	0.09181850624150001	0.6825052679420001	0.00153423191148	0.11155732809800001	7.28801253747	25.0535687933	0.107754386154			0.96297811015	ENSG00000070770	0.0427913529959	0.021557918294599996	24.6738533608	202.0	True	False	True	False	False
ENSG00000070785	0.14595189884	0.09777505328289998	0.00785959808748	0.00785959837418	0.00785959811588	0.00785959872842	0.724834654572	2213216468290.0	20593411.455	0.0722409834815	-1.34510861302	0.0733683420855	0.863476108319	Q9NR50	Q9NR50	EIF2B3	0.0818300921694	0.011403863429	0.00406819173573	0.14847992330999998	0.754217929356	1.48119383604	10.6129847076	0.11467491043			0.910025706941	ENSG00000070785	0.13813452352	0.09149549878419999	23.958841468400003	202.0	False	False	False	False	False
ENSG00000070814	0.00671673642539	0.00671672909065	0.006716728869590001	0.21987239408000003	0.0067167293822399995	0.045706679182400005	0.7075540029699999	112153387949000.0	137050434.379	0.0772726457392	-0.9029748699	0.17951987997000002	0.981321731303	Q13428-3	Q13428	TCOF1	0.38818132485600004	0.008464202303969999	0.00243101106834	0.0024310110664899996	0.598492450705	14.592835346400001	24.186555402	0.157941340492			0.961420113734	ENSG00000070814	0.069247382951	0.0404915067559	26.840330234099998	202.0	True	False	False	False	False
ENSG00000070831	0.0682591230739	0.0887609074525	0.0293376365364	0.0032970328677300004	0.0032970328894899995	0.0506600555662	0.756388211614	28439750259100.0	47812215.3451	0.111538300345	0.182303727262	0.582220555139	0.9378891305979999	P60953	P60953	CDC42	0.33091804299600003	0.00583210744067	0.0205231872757	0.00583210744467	0.6368945548430001	52.00638112520001	73.97896735970001	0.0974810171885			0.989873023292	ENSG00000070831	0.15768939987199998	0.18487161800700003	24.337554488000002	202.0	True	False	False	False	False
ENSG00000070882	0.00229380138764	0.00229380138267	0.00229380164469	0.00229380150695	0.00229380185929	0.00229380138877	0.9862371908299999	239438149586.0	3534034.74238	0.13846048837799999	-0.628349251643	0.272468117029	0.617057985147	Q9H4L5	Q9H4L5	OSBPL3	0.323355405209	0.0016693087612899998	0.00166931025348	0.035928264259300007	0.637377711517	0.561486848591	3.0715076747900003	0.243959755485			0.809904962219	ENSG00000070882	0.542928387604	0.489221927497	20.755488524	202.0	False	False	True	False	False
ENSG00000070950	0.0702206792449	0.025821041548900005	0.0023254508361	0.0023254508366799998	0.00232545083615	0.0023254508705300003	0.894656475827	381190813414.0	4298387.71593	0.14363676866900002	-0.361549722769	0.374493623406	0.648263446103	Q9NS91	Q9NS91	RAD18	0.484769762664	0.0620006960192	0.00434237943522	0.004342379436149999	0.44454478244499995	0.402077341513	5.14002832423	0.123364240035			0.8498675703049999	ENSG00000070950	0.32992561093	0.540219059377	20.5844276711	202.0	False	False	True	True	False
ENSG00000070961	0.08077522073919999	0.00283230157651	0.040322436041	0.401489508986	0.0111188251752	0.00283230167547	0.460629405807	3494313970090.0	18982854.9935	0.09847351312069999	-0.48190992861000004	0.327081770443	0.854024454279	P20020-6	P20020	ATP2B1	0.0395730716096	0.046975816114699996	0.00170213497963	0.169399661687	0.7423493156090001	1.97911190652	7.75545271759	0.181396131664			0.884260341201	ENSG00000070961	0.388433469046	0.253355782326	23.4111749477	202.0	False	False	False	False	False
ENSG00000071051	0.0029675616883799998	0.056477323276500006	0.00296756167156	0.10308274756899999	0.0149214630345	0.0029675618923800003	0.8166157808679999	868102320150.0	7728218.320510001	0.120560787514	-0.41449402596900004	0.352663165791	0.735728752532	O43639	O43639	NCK2	0.340841659998	0.00237763229004	0.00237763254461	0.055334971138399996	0.599068104029	17.714182418	25.737257361199998	0.163530321667			0.964146607463	ENSG00000071051	0.328884664989	0.339710775368	21.241584551099997	202.0	False	False	False	False	False
ENSG00000071082	0.0366063144934	0.0033350543113899998	0.0033350543102700003	0.0033350543098400005	0.0033350543101599997	0.0205361980152	0.9295172702500001	101605706010000.0	85966232.7804	0.11725494127000001	0.404324566848	0.656114028507	0.96751931588	P62899	P62899	RPL31	0.15566122914799999	0.198092281589	0.361721554777	0.00841992002612	0.27610501445999996	274.990656547	83.8388199685	0.19779431819200002			0.991645244216	ENSG00000071082	0.0182864554451	0.014676159290200002	26.272617485599998	202.0	True	False	True	False	False
ENSG00000071127	0.0226003711254	0.022134894385000003	0.0031474995130900004	0.0031474994143	0.09187351739389998	0.00314749946177	0.8539487187070001	315831636707000.0	167234582.276	0.106267808812	-0.0395820168343	0.49834958739699997	0.985597479559	O75083	O75083	WDR1	0.396803576536	0.332482827274	0.00264639970251	0.0026463997548699996	0.265420796733	36.4901331062	50.830484148400004	0.11884022831700002			0.9842642361920001	ENSG00000071127	0.141019178729	0.150867484435	26.4430648336	202.0	False	False	False	False	False
ENSG00000071243	0.0425682070001	0.184510110618	0.00135706938486	0.00135706921943	0.0013570692537799999	0.00135706925913	0.767493405265	18704406225.8	920843.7565690001	0.148520367483	-1.6947427137200002	0.0307576894224	0.345210411822	E7ET07	E7ET07	ING3	0.243867282869	0.0026886580438000005	0.00268866143082	0.0026886578456	0.7480667398109999	0.268543189765	2.65689949633	0.195043708149			0.799427436317	ENSG00000071243	0.116438487567	0.229687256484	19.299357299	202.0	False	False	False	False	False
ENSG00000071282	0.00112216347604	0.0011221634753900002	0.00112216347431	0.00112216347421	0.00112216349339	0.0668588174566	0.92753036515	9023798661620.0	14505205.0094	0.207095578656	1.5611974959200001	0.888597149287	0.8201935338680001	Q9NZU5	Q9NZU5	LMCD1	0.0757698240228	0.011722943774600002	0.310452641538	0.00042479101851899997	0.6016297996459999	2.5637105144	4.3630948188	0.366977840819			0.8367025005840001	ENSG00000071282	0.6893224038979999	0.573335204086	22.3720031624	202.0	False	False	False	False	False
ENSG00000071462	0.0008172412147110001	0.017611857222500003	0.0564914369391	0.47395641940899996	0.0227474258269	0.000817241223885	0.427558378164	248850019148.0	2872957.22962	0.17363596245000001	-0.19386963359200002	0.43818454613700003	0.5820268547	O43709	O43709	WBSCR22	0.18121924482700003	0.00279448944754	0.307063582658	0.0027944894477900002	0.5061281936199999	0.633341627934	5.76224757415	0.138110629027			0.859001324297	ENSG00000071462	0.131609208072	0.253530292928	20.7035722138	202.0	False	False	False	False	False
ENSG00000071537	0.00433348032192	0.022452274964600002	0.00433348032404	0.0298623372076	0.004333480327840001	0.00433348032759	0.9303514665260001	322834541940.0	5560582.72875	0.10218089249	-1.09574141123	0.125131282821	0.6876453379340001	Q9UBV2	Q9UBV2	SEL1L	0.346408287725	0.341440821556	0.0011161425308	0.0011161424684799999	0.30991860571999996	1.4175448554899999	6.37284537049	0.186825014283			0.8676871543200001	ENSG00000071537	0.024629248108200004	0.019120506616200003	22.3465434367	202.0	True	False	False	False	False
ENSG00000071539	0.0017965536861900002	0.0017965536831	0.0017965536820699999	0.269128056608	0.00179655369007	0.00179655368177	0.7218891749680001	2928256499460.0	12513627.3128	0.136748112786	0.30348699205400004	0.6236309077269999	0.801515265171	Q15645	Q15645	TRIP13	0.188868695848	0.0253707245952	0.312469588851	0.00261520027353	0.47067579043200003	3.9632280837000002	16.3016259941	0.122121915707			0.9409129859	ENSG00000071539	0.21707720722600002	0.267015577587	22.455657125100004	202.0	False	False	False	False	False
ENSG00000071553	0.0013941227055699998	0.12471767499500001	0.00139412265672	0.00139412264883	0.00139412284212	0.0730872755359	0.796618558616	1979087108370.0	5909564.0578	0.23805483701900002	1.3876008756099998	0.867816954239	0.696196834446	Q15904	Q15904	ATP6AP1	0.133501108798	0.18135305541400001	0.235902872179	0.0024128484763099997	0.446830115133	0.770911531103	6.142016218169999	0.14295235423900002			0.8644153618449999	ENSG00000071553	0.079648435538	0.13049302067	22.075801505500003	202.0	False	False	False	False	False
ENSG00000071564	0.0016232092396899999	0.00162320880634	0.0016232088208699997	0.0016232092154000002	0.252996647728	0.00162320881431	0.738887307376	1064237024160.0	6196435.327880001	0.166485824221	0.386391780449	0.650337584396	0.703698147176	P15923	P15923	TCF3	0.308418166527	0.00498428391146	0.0049840870598699995	0.0049840869904399995	0.676629375511	31.1759027867	55.6637747057	0.100308298957			0.985997507206	ENSG00000071564	0.10550617278300001	0.170461218687	21.5378321863	202.0	True	False	False	False	True
ENSG00000071626	0.010405935662799999	0.00132625462612	0.0013262545415499997	0.0708744472095	0.0013262545658299998	0.039490842140199996	0.875250011254	35778031443500.0	32433400.7572	0.184423275995	1.46799277614	0.877194298575	0.907958892806	K7EQ55	K7EQ55	DAZAP1	0.08944360200780001	0.005568320993330001	0.102303522123	0.0546113770808	0.7480731777949999	10.4531584451	34.9682616142	0.0924591132672			0.975695255901	ENSG00000071626	0.11682248330600001	0.229687712535	23.7679672029	202.0	False	False	False	False	False
ENSG00000071655	0.0030190829804	0.00301908689702	0.0030190880754	0.0030190866858300002	0.0262065006495	0.00301908289316	0.9586980718189999	3794391238960.0	16200800.6019	0.12023601603	0.029603031012300003	0.525656414104	0.8333958442730001	O95983	O95983	MBD3	0.207334684359	0.00189897054254	0.277084085158	0.00189897063869	0.511783289302	2.12550988231	9.124703811369999	0.159776457576			0.898068084443	ENSG00000071655	-0.0122790131063	-0.011727955893299998	23.9814931394	202.0	True	False	False	False	False
ENSG00000071859	0.048939591230300006	0.037129706786800006	0.0036364020953600002	0.10796163076099999	0.045304184507300005	0.13007545343000002	0.626953031189	4943098998210.0	20045766.0655	0.11091160662699999	-0.117105609899	0.471117779445	0.860325556972	Q14320	Q14320	FAM50A	0.562662813926	0.030911170738400003	0.00181696789904	0.00181696792309	0.402792079514	7.131591285650001	13.3939494575	0.199381365967			0.927670016359	ENSG00000071859	0.336416996317	0.296720474001	23.091278757199998	202.0	False	False	False	False	False
ENSG00000071894	0.00795451973286	0.00795452104121	0.00795451967638	0.17943717834800002	0.0287364469558	0.00795451965639	0.7600082945890001	21297504069900.0	50087160.2707	0.09213782269	-0.347668014406	0.379444861215	0.940139524417	Q10570	Q10570	CPSF1	0.332274061077	0.28926291710700003	0.0022857677444299996	0.00944114201227	0.366736112059	9.50627954579	22.744727153699998	0.13555781475			0.958732569915	ENSG00000071894	0.174560697414	0.124694417584	25.0017350602	202.0	True	False	False	False	False
ENSG00000071994	0.0017830485194700002	0.0017830448176	0.072516985024	0.060234210383	0.235518136628	0.062496215541	0.565668359087	176890696566.0	2768168.08294	0.151935772791	-0.629612371647	0.272093023256	0.575425699497	Q16342	Q16342	PDCD2	0.332344837979	0.0832111973536	0.00242880276826	0.08934329104739999	0.492671870852	5.515028790720001	14.1535740929	0.165923449977			0.93197398146	ENSG00000071994	0.272070708294	0.381598679085	19.8940416407	202.0	True	False	False	False	True
ENSG00000072042	0.00303262164383	0.0021881324549	0.0021881324393499997	0.00218813247619	0.00218813247193	0.00218813267467	0.986026715839	8670455488320.0	19050909.7057	0.15456289297	0.8203488990860001	0.766166541635	0.854399519916	Q8TC12	Q8TC12	RDH11	0.20442062088399998	0.04943773181390001	0.00174827791646	0.036682947043800006	0.707710422342	25.0259002198	27.2567092886	0.183536071745			0.966483602088	ENSG00000072042	0.403467007469	0.387451085159	22.3075448837	202.0	False	False	False	False	False
ENSG00000072062	0.0013619441985899998	0.0321522801589	0.00136194421753	0.0013619443923299998	0.0557865991964	0.0285675271105	0.879407760726	207065793711.0	2368249.4614	0.19214395842300003	-0.182842966229	0.442610652663	0.547220763634	P17612	P17612	PRKACA	0.38771437679	0.00613603882843	0.00613603909397	0.162932670957	0.437080874331	0.863064653612	10.3881428119	0.0894301077125			0.908331385838	ENSG00000072062	0.134965629988	0.387145285214	19.773882381	202.0	True	False	False	False	False
ENSG00000072071	0.027945032070299997	0.0290020327281	0.0245042193162	0.131797536306	0.00147416370997	0.042775056892499996	0.742501958977	83957863756.2	1742768.2923	0.166261249507	-0.895794876083	0.182520630158	0.491185957543	O94910	O94910	LPHN1	0.40604788395499997	0.10271772215500001	0.20790280922	0.0014305065496500002	0.28190107812	22.6133101588	29.5089378971	0.161149325218			0.969833294383	ENSG00000072071	0.0792948699076	0.106532156295	20.1925734885	202.0	False	False	False	False	False
ENSG00000072110	0.00293374290813	0.020683794632999998	0.152051345499	0.300243868709	0.125946535814	0.0456713301359	0.654887202018	474714990929000.0	182991781.80200002	0.18619078715100001	0.259054897224	0.607126781695	0.987397794614	P12814-3	P12814	ACTN1	0.296745367303	0.08662923296399999	0.00246262742695	0.0172052839507	0.5969574883550001	26.8879365606	35.840076939	0.144680434413			0.976182129781	ENSG00000072110	0.49280557268200004	0.46443558519100003	25.0202872391	202.0	True	False	False	False	False
ENSG00000072121	0.0029344861155700002	0.07236578435839999	0.00293448611662	0.0170246761234	0.126564711694	0.0205636884669	0.757612167125	305448955049.0	4374996.36934	0.12632567424900001	-0.713619266542	0.240135033758	0.651789063086	Q68DK2	Q68DK2	ZFYVE26	0.529877879504	0.22581365997699998	0.0020603490794	0.00206034907884	0.240187762361	0.273594739998	2.8959795440200002	0.180616899125			0.80530887279	ENSG00000072121	0.058256220194899996	0.057280004472000004	21.9364953993	202.0	True	False	True	False	False
ENSG00000072134	0.0024916263699699998	0.00249162742682	0.0024916273227199998	0.09046112254899999	0.00249163075004	0.165027993567	0.7345443720139999	140706510374.0	3004996.47567	0.12482832102800001	-1.09230261833	0.125506376594	0.589603180557	O95208-2	O95208	EPN2	0.21655433211599998	0.41022933630900005	0.0034870687342899997	0.0034870687880900002	0.366242194052	0.450659254459	5.85578033242	0.11464084281999999			0.8601113967440001	ENSG00000072134	0.107369360186	0.190255694047	20.9639940757	202.0	False	False	True	False	False
ENSG00000072210	0.00216104883182	0.00216104788024	0.00216104755412	0.00216104757154	0.0803203305939	0.00941734933392	0.901618128234	18160269825700.0	27820513.839	0.15317786127	0.897133874674	0.781695423856	0.895131648038	P51648	P51648	ALDH3A2	0.330903351599	0.00252569770229	0.0025256976796999998	0.0025256976808800003	0.661519555338	4.7543321525	13.864832583399998	0.157264294112			0.930338085222	ENSG00000072210	0.6032240437690001	0.7279441793670001	21.8572605896	202.0	False	False	False	False	False
ENSG00000072274	0.00131408086094	0.00131408084036	0.00131408084192	0.056410126384500006	0.0013140808454300001	0.0013140808569	0.93701946937	81648940403500.0	47671699.285	0.189546008614	1.71093573709	0.9048012003	0.937739104343	P02786	P02786	TFRC	0.151542036982	0.35437185740099997	0.0935952398391	0.000439953190061	0.400050912588	39.3386636243	23.4865201342	0.267049104898			0.960154241645	ENSG00000072274	0.46362812153599997	0.308983139328	24.0514492031	202.0	True	False	False	False	False
ENSG00000072364	0.00187380550757	0.00187380597609	0.00187380539984	0.0018738055092899998	0.00187380552149	0.00187380548131	0.988757166604	254542252354.0	2726131.3461599997	0.18506878120099998	-0.0832131876492	0.481470367592	0.5730252794240001	Q9UHB7	Q9UHB7	AFF4	0.26078222031	0.19164249556899998	0.312303180819	0.000728098226948	0.23454400507599998	8.52571449223	15.0824727016	0.193594424067			0.935927397367	ENSG00000072364	-0.0398997457121	-0.046967159958800006	21.4975458165	202.0	True	False	False	False	False
ENSG00000072415	0.0331208920411	0.0255222139029	0.00186328829246	0.35263291851899997	0.0018632882950299998	0.0018632883052	0.583134110645	987892758749.0	7953276.06395	0.124970884508	-0.29167689067499997	0.402250562641	0.7406796189329999	Q8N3R9	Q8N3R9	MPP5	0.46897918996699994	0.193963681968	0.0024512177903099996	0.00248602399744	0.332119886277	0.64982639909	5.73216931152	0.140630546852			0.858533925372	ENSG00000072415	-0.00196940262507	-0.0018059184145099998	22.9130840878	202.0	True	False	False	False	False
ENSG00000072501	0.0325539717605	0.00783977306797	0.00783977148213	0.007839773020330001	0.0859565014624	0.00783977176371	0.8501304374429999	130508913751000.0	148032707.728	0.0771724706773	-0.9270076147509999	0.171342835709	0.982596954467	Q14683	Q14683	SMC1A	0.0581588736264	0.386454261744	0.0005850830034169999	0.050368557664	0.504433223963	9.277811776810001	11.1999463153	0.271961130501			0.9141738723999999	ENSG00000072501	0.25710253234499997	0.09650250813939999	26.796197419499997	202.0	True	False	False	False	False
ENSG00000072506	0.032030759851	0.0032481972270799997	0.0032481971501399994	0.0032481972706900003	0.00324819715596	0.00324819965767	0.9517282516869999	68128637817100.0	62394858.095	0.132286660011	0.764288451029	0.7530382595649999	0.952966769185	Q99714	Q99714	HSD17B10	0.0795230365618	0.028873859090200002	0.20024852295	0.00158326367594	0.6897713177220001	51.1012868233	34.6595642134	0.206249460124			0.975364181662	ENSG00000072506	0.33036331753000003	0.243575510214	24.6395782421	202.0	False	False	False	False	False
ENSG00000072518	0.0079452188979	0.0610095714355	0.007945218822	0.00794522249106	0.029764731814000002	0.013407129629200001	0.87198290691	1627946857800.0	17194844.801	0.0742030662297	-1.34089424211	0.0743435858965	0.8409721701299999	E9PC69	E9PC69	MARK2	0.415919789361	0.0034236212408699997	0.00342362350655	0.00342362130367	0.573809344588	2.92139941389	12.645395555699999	0.135164626919			0.92303497702	ENSG00000072518	0.09137094254629999	0.0672564169119	23.781778532199997	202.0	False	False	False	False	False
ENSG00000072571	0.017853496479700002	0.00315720923735	0.00315720935505	0.0031572092817099997	0.109447057786	0.0173515989452	0.845876218915	4738839625020.0	17898812.3193	0.121621902147	0.101950715342	0.5520630157540001	0.845773010277	O75330-2	O75330	HMMR	0.332265163041	0.00167500009618	0.080981262658	0.005096516829	0.579982057376	27.0112746587	32.4178979686	0.160319994191			0.9734361610969999	ENSG00000072571	0.33414118432900003	0.26358662882899997	22.7265037422	202.0	True	False	False	False	False
ENSG00000072682	0.000649808561194	0.000649808560875	0.0006498086041189999	0.196437966141	0.272593115725	0.0006498085622919999	0.5283696838449999	1532476399810.0	5146011.477419999	0.24056151325800001	1.31155041516	0.8564141035259999	0.6757182506939999	O15460-2	O15460	P4HA2	0.133131974434	0.000402242299042	0.5217267699620001	0.006590602475520001	0.33814841082900005	0.5241102123579999	1.8464039759900002	0.392088933156			0.775375866636	ENSG00000072682	0.650640875614	0.6783171860289999	21.3171608258	202.0	False	False	False	False	True
ENSG00000072756	0.219794862761	0.00247040296864	0.00247040407089	0.00247040344767	0.054279304829500004	0.037639805367800004	0.680874816554	6259378376470.0	18672998.7177	0.133983566861	0.39957698511399997	0.65423855964	0.851774060461	Q96Q11-2	Q96Q11	TRNT1	0.0659044687356	0.288756453369	0.0016177136898	0.046454169644	0.5972671945620001	1.0114677053499999	5.67737581264	0.177144783245			0.85785230194	ENSG00000072756	0.575307059807	0.507448589995	22.7711596527	202.0	False	False	False	False	False
ENSG00000072778	0.147914817306	0.0673049238021	0.00234964930533	0.0117509168973	0.203090146779	0.0023496493034600003	0.565239896607	28558293207700.0	39517188.2533	0.135232192179	0.6445252769340001	0.7210802700679999	0.9248368464480001	P49748-3	P49748	ACADVL	0.265331264051	0.00234240369351	0.0651287028804	0.0023424036935	0.664855225682	8.215202282649999	19.5333643927	0.146734446744			0.951390511802	ENSG00000072778	0.48878338274099997	0.43819002984399996	23.298537186300003	202.0	False	False	True	False	True
ENSG00000072786	0.0127152356427	0.00135045177942	0.00135043026572	0.0451527672793	0.037022478268900004	0.0013504312014899998	0.901058205562	510449939652.0	3783474.2444	0.188836436571	0.31986638652800004	0.628057014254	0.62725977046	O94804	O94804	STK10	0.19905749714499998	0.09485408187719999	0.0025801072931599996	0.00258010723904	0.700928206445	0.223487366868	2.51105922248	0.18826497623799998			0.795259795902	ENSG00000072786	0.345154267557	0.429011706366	21.050034194200002	202.0	False	False	False	False	False
ENSG00000072803	0.00338100583067	0.0104843604729	0.00338100600342	0.153245122706	0.00338100686706	0.018497710391099997	0.807629787729	218866911501.0	4398152.40281	0.106370152159	-1.2042104786599999	0.09992498124530001	0.6526892206139999	Q9UKB1-3	Q9UKB1	FBXW11	0.176866986878	0.467798647688	0.0009704981485610002	0.0009704981481	0.353393369138	10.912323222000001	18.4475195145	0.179069092308			0.9480408195059999	ENSG00000072803	0.144730290898	0.10702340804400001	21.5803306631	202.0	True	False	False	False	False
ENSG00000072818	0.000987774477879	0.000987774480648	0.000987774478678	0.0009877744781869998	0.451239638483	0.000987774500414	0.543821489101	122047646139.0	1601719.98525	0.218111271471	-0.181865071278	0.442910727682	0.472732728227	Q15027	Q15027	ACAP1	0.514386436317	0.00105091082351	0.0587161729725	0.00105091082354	0.424795569064	0.41321528460100004	2.20959540282	0.290921240709			0.787002414894	ENSG00000072818	0.375123660646	0.484844046701	19.7321445888	202.0	True	True	True	True	True
ENSG00000072832	0.0629942205153	0.0709417495962	0.00145964930167	0.00145964927346	0.10084135745100001	0.0575062846077	0.7047970892540001	61692321016200.0	44690989.2674	0.175750102386	1.4615960655700002	0.8768192048010001	0.934138474233	E9PD68	E9PD68	CRMP1	0.229746470354	0.0007923380860260001	0.0007923380918410002	0.189859327474	0.578809525994	29.8436826802	20.2511065377	0.269759935053			0.953143257771	ENSG00000072832	0.51823393148	0.445587495709	23.428956406100003	202.0	True	False	True	True	False
ENSG00000072864	0.0034457062584599997	0.00344570634927	0.00344570629343	0.050788675795	0.00344570649462	0.0179913129546	0.917437185855	114211617195.0	2891268.0041	0.11688715559	-1.3277838884200002	0.0765941485371	0.583152051609	Q9NXR1-2	Q9NXR1	NDE1	0.0800994648266	0.141271454178	0.00311420228932	0.011567269512799998	0.7639476091930001	0.480225127038	4.67357386412	0.148276842428			0.842428137415	ENSG00000072864	0.2710289868	0.317840215777	20.6539352691	202.0	False	False	True	False	False
ENSG00000072958	0.00526990967717	0.00526990967746	0.00526990967745	0.041643805927	0.18174834109700003	0.00526990967723	0.755528214267	1138962841970.0	11542715.9933	0.09245848390969999	-0.867888409605	0.189347336834	0.791388492986	Q9BXS5	Q9BXS5	AP1M1	0.324197841358	0.004609551650750001	0.00460955165098	0.0525674605937	0.614015594747	1.05394566189	8.94743380961	0.114738882566			0.8965685128919999	ENSG00000072958	0.22499160943000004	0.21262859940900003	22.749242365900002	202.0	True	False	True	True	False
ENSG00000073050	0.00574933961289	0.0123521228714	0.00574933961211	0.00574933961374	0.285708255128	0.005749339612020001	0.6789422635500001	2806323636810.0	18764702.7652	0.0892744508814	-0.769755983942	0.220855213803	0.852224139224	P18887	P18887	XRCC1	0.41159257906400004	0.0052294457978599995	0.049363736249699995	0.00522944579577	0.528584793093	1.8498478963799998	13.8385208996	0.0982829845173			0.9300849108050001	ENSG00000073050	0.165673182032	0.17455951728	23.471490481999997	202.0	True	False	False	False	True
ENSG00000073060	0.0019296950732199999	0.0019296954908	0.0019296936393800002	0.0019296946012899998	0.00425706320111	0.0354445351326	0.952579622862	210595983673.0	2868951.15559	0.159956498173	-0.43240738509800003	0.34643660915200003	0.58172680219	Q8WTV0-4	Q8WTV0	SCARB1	0.219582888128	0.054429203027300005	0.11107244112	0.00238183723993	0.612533630484	0.9804653214040001	6.183640024090001	0.160129710771			0.8649217106799999	ENSG00000073060	0.41639423594499997	0.472205062398	20.0571868812	202.0	False	False	False	False	False
ENSG00000073111	0.0145244266863	0.011755061337899999	0.011755061294200002	0.0117550612989	0.167484207053	0.011755061947500001	0.770971120383	64182776658800.0	128347393.53799999	0.0624197747683	-1.5026490654299998	0.0507126781695	0.980196534394	P49736	P49736	MCM2	0.19477118225	0.25722989709399996	0.311921732859	0.0007604007785039999	0.23531678701900002	46.3334907627	37.6758408646	0.18066938105			0.9778959258390001	ENSG00000073111	0.0689033984204	0.028225719318499997	26.7739475618	202.0	True	False	False	False	False
ENSG00000073350	0.0036118524309299996	0.00361185234394	0.00361185234398	0.271240908963	0.00361185234605	0.0669364771508	0.647375204421	816883920786.0	9403298.88548	0.09611693940739999	-0.908117403479	0.17741935483899998	0.763633635886	J3QRV5	J3QRV5	LLGL2	0.193189542876	0.00396495746841	0.00396495748885	0.00396495746393	0.794915584703	0.853909804279	7.756726082210001	0.119131756399			0.884299291112	ENSG00000073350	0.29303433114	0.24642789506700002	22.3910701354	202.0	False	False	False	False	False
ENSG00000073536	0.00733163800786	0.017554967183000002	0.0702344294946	0.00733163787963	0.00733163814214	0.00733163794542	0.882884051347	1221215807660.0	14554306.6218	0.07592847695550001	-1.33278072151	0.07599399849960001	0.8205685995049999	Q9NVX2	Q9NVX2	NLE1	0.129827547474	0.173596715172	0.546896696889	0.00200812014006	0.147670920325	0.9106734102140001	8.49299122613	0.112362308354			0.892011373374	ENSG00000073536	0.226558310714	0.161704684159	23.249302142199998	202.0	False	False	False	False	False
ENSG00000073578	0.00199027068835	0.0019902707497899998	0.0330342440886	0.209806262476	0.07245754204360001	0.00199027063264	0.6787311393209999	47754162530600.0	51690581.8055	0.13368854485200002	0.7402113222769999	0.7465866466619999	0.9423899182359999	P31040	P31040	SDHA	0.239297030593	0.0011567175309000002	0.128829434236	0.0086319617333	0.6220848559059999	6.907343439299999	11.222594367000001	0.234186717388			0.914329672042	ENSG00000073578	0.427659473663	0.33438125431	24.420659492800002	202.0	True	False	True	True	False
ENSG00000073584	0.00673108218006	0.00673108210433	0.00673108210916	0.00673108282124	0.21123978253800002	0.006731082728959999	0.7551048055189999	5714741744130.0	28082963.6043	0.0851246555005	-0.795936181311	0.212228057014	0.895731753057	B4DGM3	B4DGM3	SMARCE1	0.738124539622	0.00312985621403	0.00312985615785	0.003129856164	0.252485891842	1.20996394888	8.160090252869999	0.134800422412			0.888311131884	ENSG00000073584	0.0811732445638	0.06741493196359999	24.5221584238	202.0	True	False	True	False	True
ENSG00000073614	0.003270656667	0.00327065669104	0.00327065678304	0.17101846002300003	0.0032706569861399998	0.061114834646500006	0.754784078203	320459348768.0	4971381.67822	0.113870011755	-0.8792076914560001	0.186796699175	0.671292476183	P29375-2	P29375	KDM5A	0.405737461532	0.05528367415080001	0.22665498596	0.00218886588245	0.310135012474	0.735783139429	5.88570454605	0.145739225925			0.860559320714	ENSG00000073614	-0.106192831798	-0.108260522192	22.5178259385	202.0	False	False	False	False	False
ENSG00000073711	0.00283349516101	0.0028334951850999997	0.00283349522863	0.0028335005595999997	0.206928307786	0.00283349572024	0.77890421036	474966306507.0	4846806.94515	0.142192169224	-0.26355297596099997	0.412828207052	0.6682169379640001	Q06190	Q06190	PPP2R3A	0.09084278351910001	0.107203036044	0.388904948115	0.00114864027171	0.411900592051	1.09721644552	5.96884401801	0.17549143467599998			0.861864142712	ENSG00000073711	0.164115581584	0.146482998122	21.7840920598	202.0	True	False	False	False	True
ENSG00000073712	0.00261125473988	0.063058840364	0.00261125468595	0.0124218988965	0.185734547403	0.158020400289	0.5755418036209999	65083129518300.0	60221833.8209	0.133961572789	0.794195038603	0.7600150037510001	0.951016427875	Q96AC1	Q96AC1	FERMT2	0.024155959963599996	0.146971097876	0.000806223941266	0.000806223935391	0.827260494284	46.9779132523	24.6079796727	0.27852930881099996			0.9621991119419999	ENSG00000073712	0.544743320453	0.376112397792	24.0858688813	202.0	False	False	False	False	False
ENSG00000073792	0.005173249996560001	0.00517325001152	0.005173249982939999	0.0051732499913	0.20229548788600002	0.00517325162089	0.771838260511	19557228697900.0	46077075.5513	0.0959773489735	-0.26878157392700003	0.41087771943	0.9357137499060001	F8W930	F8W930	IGF2BP2	0.004558523308399999	0.00592990535557	0.7160787016050001	0.0008118090994360002	0.27262106063200003	65.5762418196	51.8828666282	0.156080733773			0.9846926852069999	ENSG00000073792	0.449445185135	0.31233525158799996	23.6845113844	202.0	False	False	True	True	True
ENSG00000073849	0.0161653857442	0.00128097633976	0.00128097728222	0.118983244571	0.04969763617459999	0.0012809763392399999	0.811310803549	275108077861.0	2621819.00468	0.200054794485	0.08146383714060002	0.545236309077	0.566874202986	P15907	P15907	ST6GAL1	0.36314110436700003	0.255193469572	0.0599578529526	0.0007178522775219999	0.32098972083	24.157298699400002	22.3858620715	0.21955855359499998			0.95781724702	ENSG00000073849	0.0605797292725	0.06918417542830001	20.9369269841	202.0	False	False	True	False	False
ENSG00000073921	0.004167915275550001	0.0041679162328400006	0.00416791507861	0.138557393276	0.164244577482	0.0517588669451	0.63293541571	5592554895960.0	22641988.5041	0.104445699382	-0.25406535961599996	0.416729182296	0.874878103668	Q13492-2	Q13492	PICALM	0.43863836323	0.0046206623893900005	0.07981242098189999	0.00462066238945	0.472307891009	3.97631161313	19.2045850709	0.103832970202			0.9503388642209999	ENSG00000073921	0.356402156195	0.351641651175	22.8951722653	202.0	False	False	True	False	False
ENSG00000073969	0.0626514873111	0.083083569315	0.00654981627157	0.0065498162833500006	0.175116020528	0.00654981630064	0.65949947399	12095471672100.0	41791873.0867	0.0832184395443	-0.7289194667319999	0.233983495874	0.929037581577	I3L0N3	I3L0N3	NSF	0.262854916241	0.50727631968	0.0015693827016800002	0.0015693827023900001	0.226729998674	1.5382488709399997	7.55631558119	0.164135761746			0.8820596712630001	ENSG00000073969	0.196757186419	0.111678891053	24.967399704400002	202.0	False	True	True	True	False
ENSG00000074047	0.000663262770868	0.00066326277131	0.534823537274	0.000663262894542	0.000663262773515	0.0019629336474300003	0.460560477868	41370679537.1	880413.2192719999	0.23102542212299998	-0.44697865713999996	0.34096024006	0.333958442727	P10070	P10070	GLI2	0.396177475411	0.229615760847	0.00181670914701	0.00181670928179	0.370573345313	1.8579080809	7.93191807108	0.171843809652			0.8860715120360001	ENSG00000074047	-0.0666147883843	-0.09384911191639998	20.028386840699998	202.0	False	False	False	False	False
ENSG00000074054	0.0064233370552399995	0.006423337072810001	0.00642333705501	0.0128522137892	0.0064233406628899994	0.00642333708828	0.955031097277	11995044138900.0	42382728.0099	0.0817169254307	-0.774733563876	0.21942985746399998	0.930462830995	Q7Z460-4	Q7Z460	CLASP1	0.128553835362	0.07250612081919999	0.378688131122	0.0020666877836900003	0.41818522491300003	1.6014016980399999	9.62433574371	0.131485958748			0.9024694243200001	ENSG00000074054	0.19316241223000002	0.114381410274	24.945028825599998	202.0	False	False	False	False	False
ENSG00000074071	0.01048374465	0.00279792535299	0.0027979254402299997	0.0027979259087199996	0.039270282746	0.0027979254781700003	0.939054270424	1194180727580.0	8170572.611339999	0.133746533653	-0.075704703764	0.48417104276100004	0.744580301553	C9JJ19	C9JJ19	MRPS34	0.0738884389545	0.000970586837248	0.479396768184	0.0014252537167399998	0.444318952308	339.398687146	89.3175897494	0.206261458314			0.992287917738	ENSG00000074071	0.21817286791299997	0.19650196571800002	21.6735686071	202.0	False	False	False	False	False
ENSG00000074181	0.013553679660100001	0.0022959020281399997	0.00229590379202	0.0022959023448800003	0.0022959020413499997	0.0022959022268899997	0.9749668079070001	143148704796.0	2814117.57769	0.13444711038499998	-0.959102944997	0.16031507877	0.57895131648	Q9UM47	Q9UM47	NOTCH3	0.24169977729400002	0.152312622195	0.0007497373950100001	0.000749737348777	0.604488125768	39.9535914654	25.208357728200003	0.250745622023			0.963231284568	ENSG00000074181	0.196437793417	0.199521901024	20.4795999859	202.0	False	False	False	False	False
ENSG00000074201	0.0188657314903	0.000738927996178	0.0007389280665449999	0.325372573024	0.000738929215367	0.0051653798016800005	0.648379530405	3709887865850.0	9390550.78906	0.205111176426	1.2778124180500001	0.850487621905	0.7632585702500001	P54105	P54105	CLNS1A	0.326339841739	0.018590519373000002	0.0197476666098	0.006663259758220001	0.6286587125199999	8.12308131503	33.0770557892	0.0861655281966			0.974039884708	ENSG00000074201	0.025028264165599997	0.05921315162830001	22.806278760900003	202.0	True	False	False	False	False
ENSG00000074266	0.0049125384492399995	0.0638233653588	0.0049125377038199995	0.0152223881699	0.016272579649000002	0.00491253753363	0.889944053136	1149936134530.0	10891327.3977	0.09845914207499999	-0.724585197999	0.23593398349599998	0.7829120096019999	O75530	O75530	EED	0.33954165481799997	0.027456169737999997	0.00665779113827	0.00665779112701	0.619686593179	0.228497700498	4.26691203857	0.112028166161			0.834774480019	ENSG00000074266	0.237019441515	0.287645636185	22.677479279	202.0	True	False	True	False	False
ENSG00000074317	0.176290619767	0.000424536660811	0.000424536654334	0.125543032821	0.00042453780920800004	0.00042453665904	0.696468199629	268634569138.0	1813529.8494400003	0.28579606265	0.7021282819820001	0.736084021005	0.497487060236	Q16143	Q16143	SNCB	0.43956743881800003	0.00205937342291	0.0020593734166500003	0.0024959694309099997	0.553817844912	0.515522787919	3.56661544822	0.20131106545000002			0.8210446365970001	ENSG00000074317	0.339405147936	0.597291395546	19.4013459979	202.0	False	False	False	False	False
ENSG00000074319	0.00663026125189	0.006630261054369999	0.00663026099148	0.006630261102970001	0.0876931522879	0.148409340228	0.7373764630830001	1676689204600.0	15565596.4042	0.08318796846260001	-1.0464611770299999	0.137584396099	0.828144925362	Q99816	Q99816	TSG101	0.447146468139	0.0555746479688	0.005679330146979999	0.0056793300876200005	0.485920223657	2.10551630686	15.4223422678	0.09408685839299999			0.937504868739	ENSG00000074319	0.10606918536599999	0.11918445964800001	23.395278947399998	202.0	True	False	True	False	False
ENSG00000074356	0.004841007246609999	0.00484100742721	0.0048410070121899995	0.00484100710413	0.0583555873476	0.00484100727917	0.917439376583	1589314048580.0	12780208.0172	0.098643151412	-0.629120945205	0.272243060765	0.803615632736	Q53F19	Q53F19	C17orf85	0.147409821538	0.00197711952269	0.298644963077	0.0019771195224700003	0.5499909763390001	1.78048311029	9.20279747307	0.144993677332			0.8988276076970001	ENSG00000074356	0.191555783207	0.152082332194	23.0814352244	202.0	False	False	False	False	False
ENSG00000074370	0.00495046635085	0.0008329200423710001	0.12517201205999998	0.0008329200441290001	0.047192410987400006	0.033803499205999996	0.787215771309	179569586512.0	1837843.51462	0.230572687276	0.0936707829338	0.549362340585	0.49966244092699996	Q93084-4	Q93084	ATP2A3	0.188259632262	0.06540941643630001	0.000775068216276	0.0007750682822060002	0.7447808148039999	2.65162880912	4.828157589719999	0.337267837109			0.844940406637	ENSG00000074370	0.620034843752	0.5396512542949999	19.4481290886	202.0	False	True	True	True	False
ENSG00000074582	0.0021019880793699997	0.0253118093214	0.00210198808103	0.012632843355199999	0.298473738797	0.00210198808404	0.657275644282	260556163236.0	3708680.7569800005	0.137635740684	-0.6076009349570001	0.279219804951	0.624634311004	Q9Y276	Q9Y276	BCS1L	0.133267615457	0.031461097489	0.582859545454	0.00159043274462	0.250821308856	0.443399540589	4.47023552108	0.148959159865			0.838747370881	ENSG00000074582	0.174652801828	0.190105042267	21.3460637651	202.0	False	False	False	False	True
ENSG00000074603	0.000359022012666	0.000359022106247	0.051200487549700004	0.000359021876881	0.064911552588	0.00035902205656400003	0.8824518718100001	165763040928.0	687624.398878	0.592096609689	2.14734161551	0.941035258815	0.27259770459800003	Q6V1X1-5	Q6V1X1	DPP8	0.43429343543399995	0.00603384601327	0.006033846014959999	0.00603384601304	0.547605026524	0.254890103189	4.6775583453800005	0.10793375172599999			0.8424670873260001	ENSG00000074603	0.0123448799603	0.0552109839542	19.076435095999997	202.0	False	False	False	False	False
ENSG00000074657	0.00184475586394	0.0280495756589	0.0018447558639100002	0.44784566544	0.0018447558645400001	0.025325177935299998	0.49324531337300004	13379026328800.0	27214704.3584	0.134402898093	0.5149475920269999	0.686271567892	0.892281149201	Q9HCE3	Q9HCE3	ZNF532	0.449821611578	0.267809133053	0.00215659289108	0.00215659294306	0.278056069535	8.69515870403	21.9744634343	0.134190100197			0.9569213990809999	ENSG00000074657	0.231654227335	0.207158811443	23.746379019299997	202.0	False	False	False	False	False
ENSG00000074695	0.0034551207347399996	0.0520507507331	0.00345512070749	0.00345512072431	0.00345512074516	0.0616410100636	0.8724877562919999	4838785032180.0	19883422.6874	0.110631046184	-0.127338468992	0.466391597899	0.859125346936	P49257	P49257	LMAN1	0.29668177454100003	0.1692403143	0.0451712363261	0.0014626461181199998	0.487444028715	35.8713035313	35.2705915167	0.16980905152399997			0.9759289553630001	ENSG00000074695	0.309839753349	0.240682334948	23.011262536100002	202.0	False	False	False	False	False
ENSG00000074755	0.0005796861739550001	0.00057968620342	0.042826587731599995	0.000579686242561	0.0905256165377	0.000579686164512	0.8643290509460001	7928592213520.0	6271260.85012	0.448996727205	3.25653151223	0.9838709677420001	0.7051984097220001	O43149	O43149	ZZEF1	0.69710360913	0.00272541958737	0.04705996227519999	0.00272541955683	0.250385589451	0.186783873829	2.4838309816499997	0.173999359351			0.7944223728290001	ENSG00000074755	0.133714089426	0.305336851635	21.9425595695	202.0	False	False	False	False	False
ENSG00000074800	0.0532189514078	0.000841281107148	0.000841281093563	0.06435333969069999	0.000841283082384	0.08565754491580001	0.879062582533	5.35841316252e+16	1339271166.18	0.27763893777800003	1.5427100904799997	0.8866466616650001	0.999399894982	P06733-2	P06733	ENO1	0.21522169182599998	0.315723617343	0.0010336343219199998	0.028182009544799998	0.439839046964	8087.33573878	466.833492474	0.192637454083			0.9992210017919999	ENSG00000074800	0.18410167393100002	0.25533586589	28.0144401467	202.0	False	False	False	False	False
ENSG00000074964	0.0173959863998	0.0025595006603800004	0.00255950029026	0.10597716644300001	0.0025595276514899998	0.0025595006090000003	0.866388817946	122115661514.0	2781035.03271	0.125654840581	-1.1709063246200002	0.107051762941	0.576325857025	Q9HCE6	Q9HCE6	ARHGEF10L	0.18115072529800003	0.0027961633548899997	0.454682535959	0.0027961633496	0.358574412038	0.422537360687	5.45188555523	0.119230077699			0.854483134689	ENSG00000074964	0.12157413927	0.245363036485	20.684426909000003	202.0	False	False	False	False	False
ENSG00000075089	0.0009259989387999999	0.039579483376699996	0.000925998939678	0.0009259989405869999	0.0009259989522350001	0.0074698209649999995	0.9492466998870001	69546581601.9	1537329.98941	0.17154212861999998	-0.9072229500460001	0.177719429857	0.462530942915	Q9GZN1	Q9GZN1	ACTR6	0.203924837445	0.094601067994	0.005446132095989999	0.00544613167358	0.690581830792	0.851652136213	8.64621380279	0.106734580994			0.893764119343	ENSG00000075089	0.0532216860963	0.0881076398106	20.2341736502	202.0	True	False	True	False	False
ENSG00000075142	0.0767509082143	0.0011851097848900002	0.00118510977442	0.00118510982792	0.13405845250499998	0.0011851098248	0.784450200069	40843747428000.0	42625590.6263	0.149931325771	0.9793768537880001	0.7979744936229999	0.930837896632	C9J0K6	C9J0K6	SRI	0.659889561316	0.0026383684294899994	0.0026383684294899994	0.0785170119053	0.25631668991900003	6.13544752586	17.0709128519	0.145099654325			0.943775804316	ENSG00000075142	0.104293003474	0.135695452035	24.761441869000002	202.0	True	False	True	False	False
ENSG00000075188	0.008138550095800001	0.0215477525864	0.008138549907020001	0.008138549906390001	0.057392145492199995	0.00813855114329	0.8885059008689999	3051799144970.0	23344823.4046	0.0748320048152	-1.20925233471	0.098799699925	0.877803615633	Q8NFH4	Q8NFH4	NUP37	0.08362692683299999	0.00168756982934	0.57587580969	0.009074634459149999	0.329735059188	7.07582700959	20.565376165099998	0.12934568516			0.9538248812029999	ENSG00000075188	0.0103226377286	0.006596685665020001	24.441812688899997	202.0	True	False	False	False	False
ENSG00000075218	0.0692708770249	0.0024016573956300003	0.0024016573175100002	0.0024016576074999997	0.00240165723852	0.002401657275	0.918720836141	141387829920.0	2739762.31875	0.137243923816	-0.938324436671	0.16751687922	0.573850423824	Q9NYZ3	Q9NYZ3	GTSE1	0.283419032562	0.0029545123200900004	0.00295451231952	0.0029545123206300003	0.7077174304780001	3.97998520977	14.2731908717	0.13977183136			0.932558230116	ENSG00000075218	0.403096378133	0.47652821616700003	19.4885210681	202.0	False	False	False	False	False
ENSG00000075234	0.000932222199453	0.0009322279345560001	0.0009322223435519999	0.07400225879530001	0.32368072917199997	0.0009322227458839999	0.598588116809	1502505660460.0	5781445.42579	0.212017460321	1.0383685972399999	0.8089272318080001	0.6928962568449999	Q5R3I4	Q5R3I4	TTC38	0.570609269129	0.0550598144586	0.0433108459616	0.011254086215299998	0.319765984236	1.9827364341999998	7.150368396419999	0.196926460807			0.877346732103	ENSG00000075234	0.412005842901	0.547681541257	20.758827745	202.0	False	True	True	True	True
ENSG00000075239	0.189054867831	0.026494543667599995	0.00238811949211	0.0023881284303000003	0.0023881361634699996	0.0398179984827	0.737468205933	31546411540000.0	41817553.0301	0.134312479328	0.652606083072	0.724081020255	0.929262620959	P24752	P24752	ACAT1	0.29679415764199996	0.0017046305460100002	0.0017046279471800002	0.459034530745	0.240762053119	1.5622774927	7.6692950812100005	0.16297599462200002			0.883422918127	ENSG00000075239	0.557094324164	0.44669611307999996	23.899681000300003	202.0	False	True	True	True	False
ENSG00000075240	0.00483506675238	0.000647120997414	0.007722225770310001	0.360249852997	0.0006471209816669999	0.0343145878357	0.591584024666	192026039481.0	1919876.81148	0.22824785201499997	0.09636184752900001	0.549662415604	0.508363963694	Q6IC98	Q6IC98	GRAMD4	0.167662787545	0.00148768066237	0.00148768071569	0.00148768066242	0.827874170415	1.42384441723	5.59671154078	0.213205471			0.856450105165	ENSG00000075240	0.431079132168	0.65210321235	19.0254370514	202.0	False	False	True	False	False
ENSG00000075275	0.010086623693	0.00021117319043299998	0.02068231894	0.286617549797	0.000211173190072	0.00021117319006199998	0.681979987999	1478938304000.0	2892280.37213	0.420469635353	2.36637689969	0.953563390848	0.5832270647360001	Q9NYQ6	Q9NYQ6	CELSR1	0.120072148406	0.014234894448	0.204805247817	0.0008035902688939999	0.6600841190600001	1.31659734637	4.21876214359	0.271982804387			0.833878632079	ENSG00000075275	0.0378939743427	0.05894940887680001	21.236993598599998	202.0	False	False	False	False	False
ENSG00000075292	0.00744756556754	0.0113040384323	0.007447566826609999	0.00744756624359	0.016529554569099998	0.00744756565154	0.9423761427089999	44414828196900.0	77424910.6085	0.08607623858480001	-0.47463888181	0.330157539385	0.9627934888609999	Q14966	Q14966	ZNF638	0.444918399101	0.00245392428748	0.00245392397929	0.0024539240152600004	0.547719828617	3.16789067531	12.0846753771	0.147282146187			0.919548960037	ENSG00000075292	0.227170096351	0.12236806309800001	25.749671094	202.0	False	False	False	False	False
ENSG00000075336	0.00100650256	0.0515295444713	0.00100650249654	0.00100656769561	0.00100650312075	0.0045875327298299995	0.939856846926	924119494378.0	3935332.7944400003	0.244277013212	1.0923521631	0.8199549887469999	0.634085965044	Q9BVV7	Q9BVV7	TIMM21	0.14336356138599998	0.227819678598	0.0023022654854499996	0.00230226547381	0.624212229057	1.48215861801	7.358243679019999	0.16545243980000002			0.8797616265479999	ENSG00000075336	0.137183232398	0.22136303685800002	21.1731914219	202.0	True	True	False	False	False
ENSG00000075340	0.0033056167020900002	0.030323517198600002	0.0033056127468699997	0.00330561620125	0.253260936161	0.0033056131479699997	0.7031930878429999	11197578089000.0	27538541.1449	0.121512545883	0.226682010254	0.595798949737	0.8936313854919999	P35612	P35612	ADD2	0.605839728101	0.0007630052501980001	0.0007629916810580001	0.00307639222932	0.389557882738	3.974249949	7.02056187204	0.283959051955			0.875925060372	ENSG00000075340	0.496720978944	0.27595278315099997	23.871875795100003	202.0	True	False	False	False	True
ENSG00000075391	0.00503568770408	0.00503568779517	0.00503568751243	0.00503568934597	0.145162654488	0.00503568808994	0.8296589050650001	334073680667.0	5889814.04766	0.0981340104279	-1.171420162	0.106976744186	0.695896781937	Q9UJF2-2	Q9UJF2	RASAL2	0.5845341177210001	0.00272328034894	0.00272328034426	0.0101492529391	0.399870068647	0.579887063112	4.8892926266500005	0.155749147868			0.8459531043080001	ENSG00000075391	0.374199344363	0.367149808036	21.531074087100002	202.0	True	False	False	False	False
ENSG00000075415	0.00259456597916	0.00259456386905	0.00259455107628	0.00259455089689	0.0025945507375500004	0.00259455047609	0.984432666965	75637038193400.0	63930327.9265	0.136038027138	0.847770971458	0.7724681170290001	0.953716900458	Q00325-2	Q00325	SLC25A3	0.274827382502	0.00343675864318	0.241685244894	0.0500721330275	0.429978480933	146.00366823299998	109.30097878	0.110549767258			0.994196463348	ENSG00000075415	0.21056756051699999	0.275598301579	24.0358090919	202.0	False	False	False	False	False
ENSG00000075420	0.00434366259814	0.00434366311334	0.00434366267929	0.004343662720020001	0.0043436626615	0.0343924257063	0.943889260521	403850657519.0	6118736.19475	0.103860083608	-0.9830744900689999	0.15461365341299999	0.7013727402300001	Q53EP0	Q53EP0	FNDC3B	0.297996556528	0.00252691434289	0.137009195256	0.00252691384422	0.559940420028	0.525597674772	4.678194900769999	0.15497027596100002			0.842506037236	ENSG00000075420	0.23401131751499998	0.203503402249	22.0237823744	202.0	False	False	False	False	False
ENSG00000075539	0.00155266583869	0.00155266557722	0.00155266556602	0.472352654514	0.00155266566498	0.020022015733900004	0.501414667105	5450766301280.0	20703415.3047	0.11276823604	-0.058342458959	0.49084771192800003	0.8640012002099999	O94915	O94915	FRYL	0.397886635284	0.06566995489109999	0.00206218744377	0.0020621874670300002	0.532319034914	0.390449850196	3.4400310485500003	0.18164366996300002			0.8181818181820001	ENSG00000075539	0.0694833142595	0.07205947078739999	24.1181360001	202.0	False	False	False	False	False
ENSG00000075568	0.00276858196575	0.0006601975184530001	0.0006601975199190001	0.555515147623	0.014438957109100002	0.00221766340662	0.423739254857	236430026998.0	2449861.8251	0.19847678915	-0.0428765661877	0.497299324831	0.553821918836	Q92545	Q92545	TMEM131	0.133809363622	0.12419044017400001	0.33745655460199997	0.012006033543200002	0.392537608059	1.0648771480099999	5.470952382359999	0.188619599698			0.854716834151	ENSG00000075568	0.116212465638	0.17902296830400002	20.698588034100002	202.0	False	False	True	False	False
ENSG00000075618	0.0734349361464	0.019779953564400002	0.00199135696078	0.00199135697052	0.15557813259	0.00199135696308	0.745232906805	1730262591330000.0	263885321.75599998	0.157630689522	0.9266356182430001	0.7876969242309999	0.9930237791609999	Q16658	Q16658	FSCN1	0.159029981976	0.000980969496181	0.0009809695014069998	0.0712092138942	0.767798865132	706.5300467510001	107.76255274200001	0.246659273093			0.994079613617	ENSG00000075618	0.469319799075	0.378860871199	25.411222108	202.0	False	False	False	False	False
ENSG00000075624	0.161831740871	0.0032375214218200005	0.00323752146037	0.0032375215047600004	0.34146100265600005	0.00323752164152	0.483757170445	81820230873300.0	80442328.7609	0.11244644134199999	0.292774373915	0.6198049512380001	0.9638436726430001	P60709	P60709	ACTB	0.43329087097400004	0.0458711094726	0.00225136566038	0.1700916793	0.34849497459299994	47435.0644126	1489.46010436	0.146224744884			0.9999415751340001	ENSG00000075624	0.269129427735	0.278105438952	23.3121150793	202.0	True	False	False	False	True
ENSG00000075643	0.0214546030434	0.0394265732075	0.000716752734823	0.000716753667995	0.111386655885	0.148063525575	0.6782351358859999	69853685841.5	1121782.3810700001	0.23560583866999998	-0.24732054749899998	0.419654913728	0.393068787038	Q96EN8	Q96EN8	MOCOS	0.255889465406	0.0006116382364339999	0.510618748269	0.000611638236094	0.23226850985300002	0.537357811624	2.6299481697	0.278730564083			0.798687388019	ENSG00000075643	0.254405585955	0.33261018417599997	19.4087307248	202.0	False	False	True	False	False
ENSG00000075702	0.0165623407583	0.0018559129272100001	0.0018559126940999998	0.354460067997	0.200797255559	0.0018559126956099999	0.42261259736900003	2426544632470.0	12387846.3814	0.125747202131	0.05656865890169999	0.536309077269	0.800540094517	O43379	O43379	WDR62	0.326416254526	0.0970894722008	0.391515926945	0.0011078204300799999	0.18387052589800001	1.27203045711	5.82331224418	0.193677280137			0.8597608475499999	ENSG00000075702	0.427411822805	0.337273963076	22.589922090199998	202.0	False	False	False	False	True
ENSG00000075711	0.043691632932699995	0.00510482640246	0.00510482649637	0.00510482642059	0.229634408024	0.00510482639876	0.7062546533249999	1957082560350.0	14542861.3225	0.0961954898852	-0.650402066102	0.263765941485	0.820493586378	Q12959-4	Q12959	DLG1	0.203353326289	0.013028626267799999	0.26102282174400004	0.00451408863983	0.5180811370589999	0.786081688148	8.687869220449999	0.102051775485			0.894212043312	ENSG00000075711	0.313472379235	0.332440688641	22.7019485279	202.0	True	True	True	True	True
ENSG00000075785	0.00720430581121	0.007204296244550001	0.0072042956334899995	0.00720429536698	0.059043988666900006	0.040843635273	0.871295183004	29226872644800.0	67882685.5471	0.0796401662967	-0.693411304741	0.24808702175500003	0.956567399295	P51149	P51149	RAB7A	0.167716199519	0.00225835438609	0.002258354421	0.00225835443733	0.825508737236	122.109804595	71.1825468977	0.155239324825			0.9893082495909999	ENSG00000075785	0.32252780287099997	0.202296247405	24.743241259	202.0	False	False	False	False	False
ENSG00000075856	0.0595034827656	0.013428425270200002	0.0134284255461	0.0134284248902	0.118854065407	0.147426103499	0.633931072622	13313424591000.0	64956516.1049	0.0561722949488	-1.70305136446	0.0299324831208	0.954917110494	Q15020	Q15020	SART3	0.310290509504	0.110836036114	0.28421188645999995	0.0034245872302	0.291236980692	3.4586464275099997	18.1314743314	0.10256990753499999			0.9470281218350001	ENSG00000075856	0.12470090292500001	0.0800477662637	25.613867074899996	202.0	False	False	False	False	False
ENSG00000075914	0.00708209071245	0.007082090733329999	0.00708209088855	0.024692499071299997	0.0180892685283	0.00708209079913	0.928889869267	3197429427380.0	22171944.723	0.0806485747234	-1.0054011923100001	0.147636909227	0.872252644213	Q15024	Q15024	EXOSC7	0.19729742244600001	0.00403709560981	0.00403709555495	0.00403709548863	0.7905912909	2.75603447565	14.1807509069	0.11706931966499999			0.9321297811020001	ENSG00000075914	0.0230437435388	0.0157949926388	24.3432104752	202.0	True	False	True	False	False
ENSG00000075975	0.00131182733932	0.001311827315	0.101321553851	0.35889898595299996	0.00562804097937	0.0013118273163199997	0.530215937246	3627033487740.0	11814890.8375	0.161192959617	0.749479344601	0.7493623405850001	0.79461405746	C9J494	C9J494	MKRN2	0.0041164519	0.0366590858157	0.00411643195726	0.00418473446538	0.950923295862	1.63740449896	10.796593463399999	0.11851989034000002			0.9115252784919999	ENSG00000075975	0.0264115434222	0.0396721428076	23.3514072165	202.0	False	False	True	False	False
ENSG00000076003	0.032586167682	0.00899394433737	0.00899394461803	0.0300090888688	0.008993971456159999	0.024846502109400002	0.8855763809280001	129414007922000.0	162193959.28100002	0.0701384183773	-1.2290538711499999	0.09452363090770001	0.9849223614129999	Q14566	Q14566	MCM6	0.178631578181	0.216756832863	0.126058829681	0.00173252089966	0.476820238376	81.1579857791	57.5679004183	0.15648951319499999			0.986503856041	ENSG00000076003	0.154990518439	0.0826204607972	26.7780142987	202.0	True	False	False	False	False
ENSG00000076043	0.0018377079641099998	0.0018377079656800002	0.00183770809483	0.00183770793797	0.22179571314899998	0.015150555433200001	0.755702899455	12336188863000.0	22831312.655	0.15383658251	0.8652211097079999	0.775168792198	0.875553221814	F5GYG5	F5GYG5	REXO2	0.0865870013338	0.0680363205649	0.406878495184	0.000942636572378	0.437555546345	6.3659268237	12.4379116879	0.202853895534			0.921808054841	ENSG00000076043	0.339218944998	0.35491659979699997	23.0612673139	202.0	False	False	True	False	True
ENSG00000076053	0.0049507399568	0.00495073995003	0.004950739954970001	0.00495074023182	0.180082464978	0.00495073996776	0.795163834961	401472050861.0	6193314.6673099995	0.10230680269400001	-1.01891199898	0.144411102776	0.703323081539	Q9Y580	Q9Y580	RBM7	0.382239539868	0.0953318186317	0.00341138325716	0.0690047787949	0.45001247944899997	0.664258415313	6.46909307885	0.125986825356			0.869206200826	ENSG00000076053	0.0502564192466	0.035767459092699995	22.4521677721	202.0	False	False	False	False	False
ENSG00000076108	0.0361535270305	0.005446303591939999	0.00544630365871	0.00544630371856	0.0054463035652700005	0.0356962193116	0.906365039123	2956244360790.0	19533184.8944	0.0880231900633	-0.793934614478	0.21290322580600002	0.856799939989	J3KPG5	J3KPG5	BAZ2A	0.300433856963	0.396808054701	0.0013610738671300002	0.00136107386347	0.300035940605	12.640592095	21.7150779879	0.163727758095			0.956415050245	ENSG00000076108	0.265197564902	0.16483262369999999	23.4634249148	202.0	False	False	False	False	False
ENSG00000076201	0.00886410605685	0.00886410597249	0.00886410598604	0.00886410597506	0.252009523176	0.0331917589213	0.6793422939120001	6141778842350.0	33771439.6927	0.0733833462951	-1.17934153383	0.105626406602	0.911109444153	Q9H3S7	Q9H3S7	PTPN23	0.34747313038000005	0.0664021317041	0.153752992935	0.023834393622699998	0.40853735135799996	6.41728619091	16.427820052999998	0.154204045307			0.941419334736	ENSG00000076201	0.253013416787	0.145978674452	24.4077761558	202.0	False	False	True	False	True
ENSG00000076242	0.008307072586939999	0.00828791627225	0.00828791627331	0.00828791693979	0.33819413187200004	0.00828791627498	0.620347129781	2653869845210.0	22613084.9676	0.072041043574	-1.3260683632299999	0.0768942235559	0.874503038032	P40692	P40692	MLH1	0.16265699057	0.368452482242	0.020190224134299998	0.0022382139645300003	0.446462089089	4.510627833380001	15.7524872523	0.134824668422			0.9388486406479999	ENSG00000076242	0.21033471464200001	0.134372683208	23.8739245417	202.0	True	True	True	False	True
ENSG00000076248	0.000980414101643	0.000980414054058	0.0009804140550739998	0.36274040741700003	0.000980414592669	0.00890777186809	0.624430163912	4777847036490.0	10069237.5564	0.217079860508	1.49746374838	0.8807951987999999	0.772335158653	P13051	P13051	UNG	0.11692269439200001	0.0229846119919	0.694701260818	0.000609353142199	0.164782079655	177.86468593700002	74.5332255843	0.17893485605300002			0.989989873023	ENSG00000076248	0.323263480712	0.362495689776	20.9240078343	202.0	False	False	False	False	False
ENSG00000076382	0.005555396968620001	0.0144235674062	0.0055553969878900005	0.00555539710325	0.105655148316	0.037860204023800005	0.8253948891940001	2441875646570.0	17031186.8894	0.09175227832530002	-0.7324180928749999	0.23308327081799998	0.83984697322	Q96R06	Q96R06	SPAG5	0.41124723586999995	0.00335782914234	0.0033578291796	0.014225732333500002	0.567811373474	10.623472320700001	25.4650458239	0.127993755888			0.963679208538	ENSG00000076382	0.194327461428	0.172034133915	23.1785152985	202.0	False	False	False	False	False
ENSG00000076604	0.0017658342446900002	0.0017658342452	0.0017658344567	0.07425971917480001	0.0655268620616	0.00176583428667	0.8531500815299999	864476738838.0	6037258.56884	0.154005729883	0.145025953233	0.569542385596	0.6991973595379999	Q9BUZ4	Q9BUZ4	TRAF4	0.0933189013455	0.08748092343410001	0.26769756175000003	0.00162601877766	0.549876594693	18.1637805127	26.049078539699998	0.163610343897			0.964711381164	ENSG00000076604	0.349899101231	0.323269037677	20.958215008	202.0	False	False	False	False	False
ENSG00000076650	0.0032675687391799995	0.00941918152683	0.0032675687224400004	0.00326756874484	0.26193594117400004	0.0683984108325	0.650443760261	210230134562.0	3928950.4337199996	0.11670002100299999	-1.04032715854	0.139309827457	0.633860925662	Q9BRR8	Q9BRR8	GPATCH1	0.46892636953500005	0.032511906420499996	0.25415059720100003	0.0019529889441900002	0.242458137899	0.40048780106700005	3.5468963458099996	0.17842107392999998			0.820557762717	ENSG00000076650	0.22321222987599998	0.299123579569	21.236398613800002	202.0	True	False	True	True	True
ENSG00000076685	0.00120292245769	0.0272844648759	0.00120292244804	0.00120292244487	0.57281277622	0.0206236476846	0.37567034386799997	3622440226670.0	9638853.28783	0.19745823195999998	1.1895349045399999	0.8363840960240001	0.7667091741050001	P49902-2	P49902	NT5C2	0.247346492503	0.00885923424306	0.000971490077014	0.06712420432159999	0.675698578855	8.494380434410001	11.158670363399999	0.261188111632			0.9139985978030001	ENSG00000076685	0.46994966363799995	0.45991212203000004	21.4911698485	202.0	False	True	False	False	True
ENSG00000076706	0.000643043668289	0.0341628578848	0.00604482857425	0.000643043858398	0.229454964426	0.0256837816537	0.7033674799349999	4077822470040.0	7352934.948369999	0.274633450578	1.931350828	0.924981245311	0.729202610457	P43121	P43121	MCAM	0.369684280172	0.0331702019185	0.0007249091601	0.0007249091569110001	0.595695699592	1.60953438485	3.6551495347400005	0.34709230105300004			0.822583158059	ENSG00000076706	0.5768821803149999	0.637394762658	21.3239975597	202.0	False	False	False	False	True
ENSG00000076716	0.00443650324808	0.0797707016753	0.000892492088377	0.0008924925367530001	0.0499285903022	0.09287165101980001	0.77120756913	43535893201300.0	25767842.5108	0.256062317669	2.3622559454400003	0.953188297074	0.887555322181	O75487	O75487	GPC4	0.22729415256700003	0.07351080515530001	0.000459725874758	0.207477495299	0.491257821104	1338.49975745	103.74049539299999	0.352663757837			0.9937095894679999	ENSG00000076716	0.5960902470080001	0.523704001756	21.0920008919	202.0	False	False	False	False	False
ENSG00000076826	0.057252838055099994	0.00354828762391	0.0035482876667899997	0.00354828762157	0.00354828762177	0.12578742813899998	0.8027665832719999	481264075298.0	6501431.55944	0.10670449802200001	-0.868784099111	0.189197299325	0.7104493286329999	Q9P1Y5-2	Q9P1Y5	CAMSAP3	0.388985136302	0.00258490474617	0.00258490473788	0.0426663408709	0.563178713343	1.3469631256	7.730273277569999	0.15013536569			0.883987691828	ENSG00000076826	0.14189985753599998	0.120836651226	22.240517498000003	202.0	False	False	False	False	False
ENSG00000076924	0.00560583122209	0.00560583122233	0.0056058312116	0.319723116398	0.00560585874252	0.08985203881480001	0.568001492388	1014266141320.0	12954430.412999999	0.0777423459057	-1.3097691186700002	0.0801200300075	0.805415947791	Q9HCS7	Q9HCS7	XAB2	0.494287834969	0.00618954068511	0.192592909628	0.0019830415351	0.304946673183	6.956765453280001	17.0509644711	0.154687325693			0.9437368544050001	ENSG00000076924	0.08827600086710001	0.06477506884510001	23.359988759	202.0	True	False	True	False	False
ENSG00000076928	0.0057103292022600005	0.00571032920135	0.0057103292007799995	0.00571032935214	0.00752403903296	0.00571032920173	0.9639243148090001	1516275141930.0	14119407.7266	0.0872112533619	-0.9438183575970001	0.16571642910700002	0.816592903758	Q92888-3	Q92888	ARHGEF1	0.219699898898	0.048474349549699994	0.00377775737593	0.0842764379827	0.6437715561940001	0.630478526942	5.853509552969999	0.135649694009			0.8600919217890001	ENSG00000076928	0.173264524683	0.129619440967	23.4006932956	202.0	True	False	False	False	False
ENSG00000076944	0.025023911748	0.00506344670246	0.00506344619135	0.251413865471	0.00506344949111	0.0050634578319	0.7033084225640001	818208035235.0	10699280.5317	0.0845429300559	-1.1771735565299999	0.10607651912999999	0.7801365238920001	Q15833-2	Q15833	STXBP2	0.248922868682	0.00418870315179	0.330423528367	0.00418870315086	0.41227619664899995	0.215172139772	4.1999874569	0.11044473715299999			0.833489132975	ENSG00000076944	0.33889302382700004	0.378895259886	22.4459640526	202.0	False	False	True	False	False
ENSG00000076984	0.012467589331100001	0.00415942992317	0.00415943080687	0.030476127592000003	0.0795316987931	0.034086959362499995	0.8351187641910001	969406847250.0	9990733.00899	0.0985497866433	-0.787274355254	0.215528882221	0.771359987998	O14733	O14733	MAP2K7	0.34758456914700003	0.04687501434090001	0.008278771171649999	0.008278770274939999	0.588982875066	0.779703257834	10.327638052200001	0.0854995178004			0.9077666121369999	ENSG00000076984	0.0235321280485	0.0336830471627	23.122994784299998	202.0	False	False	True	False	False
ENSG00000077063	0.00128447647217	0.032147254267	0.00128447651955	0.00128447649287	0.00128447662091	0.00848380198724	0.95423103764	1139558535590.0	4599764.1967	0.232077346769	1.0951002747	0.820330082521	0.6595154151979999	Q8WZ74	Q8WZ74	CTTNBP2	0.589734196612	0.0018906971611800001	0.0018906969647100001	0.08635239567189999	0.32013201359	0.767980474102	4.907823736	0.178560803869			0.846459453143	ENSG00000077063	0.29030777462699997	0.407016263367	21.089233362599998	202.0	False	False	True	False	False
ENSG00000077097	0.00435543784025	0.00435543789745	0.0043554376956000005	0.048410197068	0.00435544236575	0.0043554377329	0.9298126094	420197891198000.0	198094345.094	0.103479627369	-0.17377207334800002	0.445911477869	0.988823044033	Q02880-2	Q02880	TOP2B	0.16453316242799998	0.118687977589	0.5470602360369999	0.00106250560243	0.168656118343	109.528989805	74.8045464626	0.139906066649			0.990067772844	ENSG00000077097	0.061868346707600004	0.042689003374899996	27.2832821902	202.0	True	False	False	False	False
ENSG00000077147	0.0225896548752	0.0026128578027600005	0.00261285779816	0.00261285782243	0.00261285779697	0.00261285780211	0.9643460561020001	5795425121850.0	18543337.6973	0.129823927078	0.305446381259	0.624606151538	0.8506488635510001	Q9HD45	Q9HD45	TM9SF3	0.176883325521	0.0586138771365	0.410092885573	0.00244032912235	0.351969582647	19.2985368319	39.144745027199995	0.112224769729			0.9786943990029999	ENSG00000077147	0.0700193519276	0.0681057404696	23.7492509812	202.0	False	False	False	False	False
ENSG00000077150	0.11198900164100001	0.000585208936886	0.000585208908556	0.00058525139406	0.000585209170547	0.0225591665959	0.863110953353	2030522910400.0	6146727.590919999	0.231824846239	1.33659759836	0.8607651912980001	0.7020478583750001	Q00653-4	Q00653	NFKB2	0.290242750519	0.028014836412299998	0.124468759833	0.00119027986674	0.556083373369	2.5835295878799998	7.668831642689999	0.20959335822			0.883403443172	ENSG00000077150	0.325634859516	0.393824305904	21.299050135199998	202.0	True	False	False	False	False
ENSG00000077152	0.00135344706351	0.0013534470555699998	0.00135344705406	0.00135344705564	0.176685026968	0.0013534470552399999	0.816547737748	1098292097900.0	5644299.1645599995	0.185673064263	0.638576631888	0.7199549887469999	0.689745705498	Q9NPD8	Q9NPD8	UBE2T	0.13044176290200002	0.0399070529786	0.29746400635000003	0.0013007643996099999	0.53088641337	45.1687207596	36.2707923333	0.185294211608			0.9766884786159999	ENSG00000077152	0.193453376413	0.20884282555	21.2724412242	202.0	False	False	False	False	False
ENSG00000077232	0.00490747343075	0.004907473492949999	0.00490747340848	0.00490747397841	0.00490747339455	0.00490747338907	0.970555158906	2061816884570.0	14843437.2605	0.09673654332739999	-0.6271233979199999	0.27261815453899996	0.822743980197	Q8IXB1	Q8IXB1	DNAJC10	0.16055681479699999	0.176882050516	0.004885597476520001	0.00488559129863	0.652789945911	0.873412428571	8.75602589861	0.1067339658			0.894971566565	ENSG00000077232	0.21863146763799998	0.24078270071400001	23.0193544117	202.0	False	False	True	True	False
ENSG00000077235	0.009267662910209999	0.0259550612582	0.00926762409601	0.056337242258699995	0.00926762458533	0.04464409334419999	0.845260691547	19340214960700.0	62633186.2053	0.0702143925898	-1.0629348165799999	0.13270817704399998	0.953116795439	Q12789	Q12789	GTF3C1	0.33669067147	0.464650092855	0.0112253341704	0.0011426373355599999	0.18629126416900002	10.971984808299998	19.8421353204	0.166937610054			0.95216951001	ENSG00000077235	0.10341283273499999	0.0508856156276	25.6811995746	202.0	True	False	False	False	False
ENSG00000077254	0.024537922943199997	0.00477362797873	0.00053568455576	0.000535684587359	0.019011607120400002	0.012190627335	0.93841484548	1388375759980.0	2583750.8944200003	0.45603993103699997	2.43625253704	0.9573143285819999	0.5640237041480001	Q8TEY7-3	Q8TEY7	USP33	0.372636739288	0.00325374411305	0.00325374413237	0.00325374412196	0.617602028344	3.906182645	14.783677622799999	0.133688419644			0.9345057256370001	ENSG00000077254	0.18871131739500002	0.368522881651	19.7513702951	202.0	True	False	False	False	False
ENSG00000077274	0.0561102082608	0.036911615111300006	0.00046563233880599997	0.00046563234216000004	0.206261153898	0.0004656323333949999	0.699320125715	233692385382.0	1544536.35042	0.31298544882	0.83197145345	0.7687921980500001	0.46350611357	Q9Y6Q1	Q9Y6Q1	CAPN6	0.312596813923	0.000205260702001	0.00020526070083800002	0.254754690905	0.43223797376900003	11.7720814725	6.61278096651	0.51885080113			0.8713484458990001	ENSG00000077274	0.741651480494	0.5850670580539999	18.834065525699998	202.0	False	False	False	False	True
ENSG00000077312	0.0409781725883	0.04984771994440001	0.00417368651466	0.125503625019	0.17618304852299999	0.00417368671225	0.5991400606989999	24130204363100.0	46009458.3328	0.106766100183	0.0378793265559	0.529032258065	0.935563723652	P09012	P09012	SNRPA	0.37326601206	0.188483351701	0.0024064310772399997	0.0024064310694	0.43343777409199996	147.982990369	82.0682584309	0.148228147905			0.991392069798	ENSG00000077312	0.18058214650899998	0.1417775207	24.5588621053	202.0	True	False	False	False	False
ENSG00000077348	0.0035511117294	0.00355111590755	0.00355111916462	0.0035511120064	0.459783911364	0.0399212784179	0.48609035141	922578881838.0	8349853.35138	0.11503312196799999	-0.49290733963699995	0.322205551388	0.7472807741349999	Q9NQT4	Q9NQT4	EXOSC5	0.233098871217	0.0019169503788299999	0.303180758045	0.00191695037943	0.45988646998000005	7.82041675467	19.1027308821	0.146392723777			0.949988315027	ENSG00000077348	0.060220824625399995	0.0502674112954	22.766921128200003	202.0	True	False	True	False	True
ENSG00000077380	0.0203102219902	0.00110240865063	0.00110240862491	0.6039484827030001	0.00110240895208	0.00110241542978	0.371331653649	23261247868900.0	33814941.0077	0.142629010887	0.738594987953	0.74576144036	0.911484509789	Q13409-2	Q13409	DYNC1I2	0.0602665215204	0.00309512162037	0.6885729325900001	0.017725384157	0.230340040112	12.5014633571	29.284670586999997	0.12073691726600001			0.9695216951000001	ENSG00000077380	0.26048014057700003	0.282020995963	23.618833347800003	202.0	False	False	True	True	False
ENSG00000077454	0.053257400385499996	0.0023866357607499997	0.00238663525762	0.00238663562625	0.00238663929638	0.00238663537985	0.934809418294	543267985332.0	5064549.14238	0.145534603466	-0.153415640045	0.45536384096	0.6738429225110001	O75427	O75427	LRCH4	0.44262815142800005	0.0444988365857	0.00424083380524	0.00424083224482	0.504391345937	0.43154366016999995	5.01822226165	0.130906881672			0.848036924515	ENSG00000077454	0.09933132713469998	0.144487702466	21.891689091900002	202.0	False	False	False	False	False
ENSG00000077458	0.0221959649027	0.0025287029856300002	0.0025287225140000003	0.00252870383706	0.14621822170999998	0.00252870297302	0.8214709810780001	69957572461.8	1967801.25917	0.13441140827099998	-1.41426802778	0.0628657164291	0.512714725077	F5GX09	F5GX09	FAM76B	0.576917835497	0.0026619627860300006	0.0220821748252	0.00266196348084	0.395676063411	0.462460329867	4.22163025415	0.16108572229499998			0.8339565319	ENSG00000077458	0.18665634624400002	0.264070752765	20.22250035	202.0	False	False	False	False	False
ENSG00000077463	0.00337627377424	0.00337627604307	0.00337627379457	0.00337627514263	0.00337627462437	0.00337627384089	0.97974235278	67021802373.0	2237149.02575	0.11572125534000002	-1.71720734527	0.0290322580645	0.536868952067	Q8N6T7	Q8N6T7	SIRT6	0.563474725577	0.016234159286700002	0.0669990387214	0.0028662004988499997	0.35042587591700003	0.784451482777	5.7367806799	0.154388446497			0.858572875282	ENSG00000077463	0.12879500337000002	0.13964834933700002	20.7109854879	202.0	False	False	False	False	False
ENSG00000077514	0.00663794563016	0.006637946221970001	0.006637945693770001	0.0066379458504999996	0.0595753428347	0.00663794583247	0.9072349279359999	963956306423.0	12070460.0414	0.0813401280557	-1.21334022709	0.0977494373593	0.797014477534	Q15054	Q15054	POLD3	0.0230174122698	0.0397276846559	0.435425718864	0.0017626821378800002	0.500066502072	2.00236972602	9.639186603639999	0.14680192398			0.9026641738719999	ENSG00000077514	0.402361398706	0.35459465636200005	22.288847789499997	202.0	True	False	False	False	False
ENSG00000077549	0.0135503095569	0.00489216917959	0.004892165030770001	0.004892165644920001	0.004892175810479999	0.00489216505505	0.961988849722	59779899141300.0	94098223.8894	0.08216676011589999	-0.639119336548	0.26811702925700004	0.971194959118	P47756-2	P47756	CAPZB	0.04808403320230001	0.31098954391	0.005276560346220001	0.0052765603457	0.630373302196	63.1469366154	82.6662273228	0.0961275836152			0.9914894445739999	ENSG00000077549	0.0612016788471	0.06210535694469999	26.0901143264	202.0	True	False	False	False	False
ENSG00000077684	0.00200624316201	0.00200624316781	0.00419587026231	0.05605290211069999	0.00200624363358	0.128294771815	0.8054377258490001	1100144423270.0	6839013.88064	0.153366803359	0.207642290266	0.591072768192	0.7178756282350001	Q6IE81-2	Q6IE81	JADE1	0.16824278758400002	0.00168372275084	0.0016837227484900001	0.023294237463700004	0.805095529453	20.5697267658	25.5833591236	0.177278755455			0.9639518579109999	ENSG00000077684	0.256588034478	0.23572421149300002	21.590883465500003	202.0	True	False	False	False	False
ENSG00000077782	0.024372056795200003	0.00307595061984	0.00101617109285	0.0010161717897	0.128080020752	0.00101617104476	0.841423457906	4342455735280.0	9717743.023330001	0.21443826746300002	1.43410319149	0.8732933233310001	0.767459305378	P11362-21	P11362	FGFR1	0.135674692048	0.133954440065	0.064820983571	0.00318583164596	0.662364052671	179.236791782	56.52828485770001	0.23683602985			0.986153306847	ENSG00000077782	0.600862260397	0.573032591566	19.821510983299998	202.0	True	False	True	False	False
ENSG00000077809	0.0036236592175599995	0.0197258698319	0.00362365904183	0.026268835046	0.0036236644401700002	0.0036236590499899995	0.939510653373	392817501275000.0	179618106.78	0.11034313021600001	0.0458389468791	0.532258064516	0.98694771585	P78347-4	P78347	GTF2I	0.042580281475599994	0.341858920032	0.356448182227	0.000952550647932	0.258160065617	22.128677237399998	30.654260780500003	0.15345706210100002			0.971138116382	ENSG00000077809	0.24005523867400003	0.177245151706	26.545200066	202.0	True	False	False	False	False
ENSG00000077942	0.00124341761699	0.157113315797	0.00124341761698	0.0748198860485	0.00124341761699	0.08843982964389999	0.675896715659	224873978112.0	2225233.24323	0.21310520734299998	0.038251144917800003	0.5292573143289999	0.535818768284	P23142-4	P23142	FBLN1	0.35559648572999997	0.00133640382614	0.0013364037517	0.00133640481187	0.64039430188	30.2093868344	26.933384180500003	0.204070406345			0.965977253252	ENSG00000077942	0.243890182826	0.323633004355	19.4781432005	202.0	False	False	True	False	False
ENSG00000078018	0.00034871959307699994	0.0431669694709	0.000348719593023	0.00034871970484	0.123590398191	0.000348719595453	0.8318477538519999	36670398158400.0	15810635.8412	0.383008556959	3.36457203008	0.985746436609	0.830170279799	P11137-3	P11137	MAP2	0.254552756794	0.105655302324	0.00023681975576900005	0.00023681974889700003	0.639318301377	3.52947222648	3.49853877816	0.536992465692			0.819603489912	ENSG00000078018	0.7862482039390001	0.7094994940549999	22.3413185005	202.0	False	False	False	False	False
ENSG00000078043	0.00428542581819	0.014016456329399999	0.00428542581172	0.0566020314955	0.00428542583608	0.015282492478	0.9012427422310001	354915030821.0	6052669.82038	0.09842721860789999	-1.1451756851000001	0.11290322580600001	0.700022503938	O75928	O75928	PIAS2	0.09989809889830001	0.11977265179600001	0.00517390526815	0.11475115443499999	0.660404189602	0.412546791689	5.844085998500001	0.10990564740900001			0.8600140219679999	ENSG00000078043	0.280974512528	0.35708771789800003	21.533282545	202.0	False	False	False	False	False
ENSG00000078053	0.00172008335807	0.00171992582909	0.0017199258351099998	0.00171992935547	0.00171993419394	0.00171993266374	0.9896802687649999	165035677823.0	2398864.57901	0.169349215365	-0.529974326955	0.30690172543099997	0.550221288726	P49418-2	P49418	AMPH	0.21477466527199998	0.13548348329399998	0.00124703008786	0.00124702927702	0.647247792068	0.37339481959700005	2.43372751846	0.251080041301			0.792767001636	ENSG00000078053	0.567895293924	0.626401813721	20.050253408499998	202.0	False	False	False	False	False
ENSG00000078061	0.0027678544899299995	0.00276785448924	0.00276785448872	0.00276785449149	0.145603188564	0.00276785452115	0.840557538956	126315556634.0	2672245.88923	0.133000110701	-1.06691196028	0.131432858215	0.5703248068410001	P10398	P10398	ARAF	0.500909152947	0.374975300288	0.00130774921073	0.00130774921314	0.121500048341	5.79229501832	13.4909621571	0.178394891065			0.928254265015	ENSG00000078061	0.0179601630166	0.017722400085700002	21.2460058635	202.0	False	False	False	False	False
ENSG00000078070	0.038258094141199996	0.0020013190526	0.00200131644065	0.00200131694977	0.697970368753	0.025442723539900004	0.23232486112300002	2112580281460.0	10124458.007000001	0.14356045545999999	0.308631458268	0.625356339085	0.773010276798	Q96RQ3	Q96RQ3	MCCC1	0.53844241062	0.0995009520991	0.00246604435535	0.00246604435288	0.35712454857299997	1.09161455457	6.8159562971700005	0.15328789543500002			0.873549115837	ENSG00000078070	0.53572688156	0.563347043786	21.5810526538	202.0	False	True	True	True	True
ENSG00000078140	0.0028561484033099997	0.00174294247522	0.00174294247494	0.00174294247616	0.15673344206700002	0.015428579780899999	0.819753002322	16015126045200.0	30405122.6197	0.13161894984099998	0.47853963575900005	0.676219054764	0.903233065787	P61086	P61086	UBE2K	0.504696485741	0.078779337342	0.0027103969899100002	0.00271039700694	0.41110338292	42.7117673563	52.189762908	0.125224252302			0.9847705850280001	ENSG00000078140	0.0110439795876	0.0140417219637	24.7634071514	202.0	False	False	False	False	False
ENSG00000078142	0.0187484558235	0.0038284259308899995	0.0038284253472	0.37089993145000005	0.0038284257416799994	0.0082923299354	0.590574005772	1430615264940.0	13942762.9312	0.08578524269139999	-0.996010228105	0.150187546887	0.815242667467	Q8NEB9	Q8NEB9	PIK3C3	0.0659469472942	0.179282715841	0.0036470013586799997	0.0036470015690399996	0.7474763339370001	0.200540677692	3.00995285461	0.148778969363			0.808366440757	ENSG00000078142	0.20404334489300002	0.18850313995	23.3380710459	202.0	True	False	False	False	False
ENSG00000078177	0.00310693124436	0.00310693125114	0.00310693123985	0.37553419486999995	0.299443405483	0.0168098953951	0.298891710516	2163518597450.0	14580771.3763	0.10087877875399999	-0.512321021928	0.315003750938	0.8208686520139999	Q86UW6	Q86UW6	N4BP2	0.652199459145	0.0722874639584	0.00140346299075	0.00140346300509	0.27270615090100003	3.35436665869	10.3339852051	0.177230078929			0.9078055620469999	ENSG00000078177	0.116930573684	0.0780190324142	23.4970568374	202.0	True	False	False	False	True
ENSG00000078269	0.000548241797883	0.0005482418002940001	0.000575981999095	0.5883797688660001	0.0434625656654	0.000548241801402	0.36593695807	642991089768.0	3673135.1323	0.21830594929900002	0.71614233236	0.739609902476	0.622758982822	O15056	O15056	SYNJ2	0.390083089304	0.0985748996157	0.00183334393767	0.00183334393664	0.5076753232060001	0.25458626305	1.96398420153	0.256909103239			0.7793292825429999	ENSG00000078269	0.418364593247	0.5046039114590001	20.9593409679	202.0	False	False	True	False	False
ENSG00000078304	0.00366744147253	0.0431578415824	0.0036674414721799995	0.0036674414746	0.0036674414724	0.042949841083000005	0.899222551443	98649466961.8	2805031.6340099997	0.111972044496	-1.49133075205	0.0524381095274	0.5781261720800001	H0YJ75	H0YJ75	PPP2R5C	0.18589970606400003	0.0383223700985	0.255774684455	0.00687753679554	0.513125702587	0.599707399434	9.723372713489999	0.07964394620819999			0.903326322349	ENSG00000078304	-0.06747029175580001	-0.11393596905799999	21.7862072242	202.0	False	False	True	False	False
ENSG00000078369	0.00672593540151	0.0067259328817	0.00672593279995	0.0067259354970600005	0.265947209305	0.0067259329593799995	0.700423121156	43474980914700.0	80827461.888	0.0815756904937	-0.633891302441	0.26991747937	0.9639936988969999	P62873	P62873	GNB1	0.523971647607	0.242381309231	0.0030030498160399997	0.0030030498097800003	0.22764094353599998	66.6635867654	74.7996373748	0.10915530461100001			0.9900482978890001	ENSG00000078369	-0.0391969724359	-0.042393762764	26.546846612	202.0	True	False	False	False	True
ENSG00000078403	0.00399217687959	0.00212235832794	0.00212235861273	0.00212235836867	0.012608539851899999	0.0890979308154	0.887934277144	39878684429.7	1372910.1977600001	0.145454874682	-1.51929106526	0.047861965491399996	0.43792663716200003	P55197-1	P55197	MLLT10	0.291826886331	0.00238799119965	0.00238799119971	0.0150178719508	0.6883792593189999	3.0579698903	11.9577161374	0.146240735592			0.918750486874	ENSG00000078403	0.159512922042	0.20149626213799998	19.6215639493	202.0	False	False	True	False	False
ENSG00000078618	0.00376662050835	0.00680141520705	0.0037666204890400004	0.00376662068249	0.0660273944414	0.00376662047164	0.9121047081999999	31211000105100.0	51180434.1727	0.109156569076	0.15093198682700001	0.571942985746	0.9412647213259999	B1AKJ5	B1AKJ5	NRD1	0.459343245259	0.0810163118091	0.00648742829059	0.00648742826975	0.446665586371	12.8732023425	40.0550643544	0.08957480346669999			0.979103373062	ENSG00000078618	0.135870330909	0.213056858416	24.4378360305	202.0	False	False	False	False	False
ENSG00000078668	0.00351191734639	0.00351191728954	0.00351191729011	0.25173455098299996	0.005679675930890001	0.0035119172895799996	0.7285381038709999	26022385877300.0	49896600.6404	0.10223570527300001	-0.0493213355073	0.494448612153	0.939914485035	Q9Y277	Q9Y277	VDAC3	0.505127671724	0.00409711378646	0.00409711279156	0.00409711281404	0.48258098888400003	15.9684471156	34.695459026900004	0.11517512824699999			0.975442081483	ENSG00000078668	0.0916297269376	0.10252296697100001	25.0375168179	202.0	False	False	False	False	False
ENSG00000078674	0.25618258318500003	0.01239682095	0.0036893088973300003	0.003689308906	0.0536378922126	0.016958286870899997	0.653445798979	9646618654150.0	28434243.0193	0.10923099365599999	-0.0737926813974	0.484996249062	0.8972320156029999	E7ETA6	E7ETA6	PCM1	0.15191991457999998	0.126987595903	0.291051720821	0.0022308834055200003	0.42780988528999997	3.9646546135	15.3291989422	0.129892243809			0.936998519903	ENSG00000078674	0.128320996887	0.103746525419	24.3330521626	202.0	True	False	True	True	False
ENSG00000078747	0.0047001152456699995	0.004700116183920001	0.00470011529532	0.00470011533277	0.004700115245439999	0.00470011556292	0.9717993071340001	346886841896.0	5927377.3268099995	0.099364519942	-1.1315535296700001	0.116279069767	0.696946965719	Q96J02-2	Q96J02	ITCH	0.293009434797	0.15148451029100002	0.00165084122979	0.0016508412098	0.5522043724719999	4.473071093590001	12.1350177573	0.174285992612			0.91982160941	ENSG00000078747	0.282260902036	0.214474547284	21.6949111652	202.0	True	False	False	False	False
ENSG00000078808	0.00272868871537	0.0496946970801	0.00272868787472	0.0027286882476599997	0.0027286885593099997	0.00272868774181	0.9366618617810001	3155460122160.0	13588008.2764	0.130730085526	0.20988516066399998	0.59167291823	0.811492011102	Q9BRK5	Q9BRK5	SDF4	0.193649579923	0.0737180683059	0.034352965508500005	0.005463312714109999	0.692816073549	2.4392004768	15.4991823388	0.100766218432			0.937855417933	ENSG00000078808	0.054718974210299996	0.097130030603	23.289056236300002	202.0	False	False	False	False	False
ENSG00000078902	0.00457061273083	0.0045706127035900004	0.00457061267436	0.00457061270151	0.040801350421800005	0.00457061266596	0.936345586102	199642504283.0	4372707.06606	0.102182404999	-1.32619612565	0.0768192048012	0.651489010577	Q9H0E2	Q9H0E2	TOLLIP	0.271360438383	0.08447618120660001	0.0545677104593	0.00405222971246	0.5855434402390001	0.30463719402600004	4.39445580963	0.125599052064			0.837403598972	ENSG00000078902	0.113101283758	0.109258995264	21.790742599	202.0	False	False	True	True	False
ENSG00000079150	0.000628746723815	0.06968950917500001	0.0006287451736530001	0.000628746007666	0.414905128541	0.00337233406698	0.5101467903119999	406588557345.0	2250248.57356	0.283365570193	0.873872749677	0.7768192048010001	0.537919135849	Q9Y680-3	Q9Y680	FKBP7	0.439414957984	0.0708947790867	0.00213939147035	0.00213939137334	0.485411480085	0.18834755137899997	1.8639048267400002	0.232839284619			0.776018540157	ENSG00000079150	0.535066083794	0.928610334626	19.6449226274	202.0	False	False	True	True	True
ENSG00000079246	0.036331927916099994	0.042477935279699994	0.00612449584137	0.0805176490302	0.12310433365999998	0.00612449573033	0.705319162542	574009342419000.0	306226600.178	0.0782377888113	-1.16188408716	0.10900225056299999	0.9946740679620001	P13010	P13010	XRCC5	0.411713531374	0.142597831739	0.005523483606770001	0.00552348357276	0.434641669708	293.291967855	195.43985576	0.0876267998182			0.9972540313160001	ENSG00000079246	-0.00354061863168	-0.0036200974833000004	28.2214103702	202.0	True	False	False	False	False
ENSG00000079257	0.00511800932051	0.000506649756306	0.000506649746795	0.00050665005594	0.000506649891882	0.049113931133000006	0.943741460096	112186565579.0	1126967.3396	0.29720704275	0.42397755176799995	0.6615903975990001	0.394193983947	Q9BS40	Q9BS40	LXN	0.642102239304	0.00140224222202	0.00140224225412	0.00140224223602	0.35369103398400004	0.736226977651	3.45611831119	0.24826600892099998			0.81851289242	ENSG00000079257	0.256055143985	0.430646018332	19.1076116367	202.0	False	False	True	True	False
ENSG00000079313	0.00937103095788	0.0016318345433999999	0.00163183452203	0.00163183450223	0.00251898658628	0.0016318345906199997	0.981582644298	380393115738.0	3814037.01691	0.161707968252	-0.121629437056	0.469092273068	0.628534993624	Q8N1G1	Q8N1G1	REXO1	0.41369570584	0.009806831755	0.035111045744300004	0.0047831988862899995	0.536603217774	2.1884952313099997	13.4683566279	0.109839410849			0.9280984653740001	ENSG00000079313	0.10782463887499999	0.192933300176	21.072243308399997	202.0	False	False	False	False	False
ENSG00000079332	0.047208676876	0.00279944422338	0.00279944356712	0.0027994437189299997	0.00279944509961	0.0027994435703899995	0.938794102945	24495531893500.0	43847225.7048	0.11287592364700001	0.174564652111	0.579294823706	0.9326382116869999	Q9NR31	Q9NR31	SAR1A	0.267570775002	0.404919607897	0.00390673857838	0.00390673857838	0.319696139944	4.34867013151	19.630540555499998	0.10622970466			0.951604736309	ENSG00000079332	0.027379778317400003	0.0330423565626	25.2300437562	202.0	False	False	True	False	False
ENSG00000079387	0.00185614487566	0.0018561448975400001	0.0018561448697599998	0.15670466912	0.0612827683934	0.029113445910099997	0.747330681934	64961990520.0	1700359.98976	0.149895565404	-1.21624538488	0.09714928732180002	0.48646013052299997	Q9P0U3-2	Q9P0U3	SENP1	0.32229183204	0.28910870956900003	0.0405938161237	0.00309040895313	0.344915233315	0.757114106253	7.187452221110001	0.121061401746			0.877716756251	ENSG00000079387	0.008630532729620001	0.012628444921799998	20.6306713191	202.0	False	False	False	False	False
ENSG00000079432	0.00184695391047	0.0867297053464	0.0745966238588	0.0018469466068900002	0.0018469466867499999	0.05699166836069999	0.77614115523	218073009456.0	3181712.33963	0.146770930035	-0.562747344082	0.2951987997	0.601080189033	I3L2J0	I3L2J0	CIC	0.46103903681599995	0.00251416607388	0.00251416607387	0.00251416607394	0.5314184649620001	1.3044992935	7.558476540139999	0.151108068605			0.8821180961280001	ENSG00000079432	0.0917799606388	0.15806457152	21.102989325899998	202.0	False	False	False	False	False
ENSG00000079459	0.0304799983082	0.000930674360722	0.000930673803211	0.27945326604000004	0.20145837327799998	0.00567783961925	0.481069174591	172687193382000.0	67914852.354	0.19349302073199998	1.86800800181	0.9195048762190001	0.956642412422	P37268	P37268	FDFT1	0.311450346891	0.00135125059845	0.0013512512608800003	0.023565611089499998	0.6622815401600001	339.003125867	91.6439425835	0.200908396204			0.9925995170209999	ENSG00000079459	0.559454730883	0.52327026871	22.549094808400003	202.0	False	False	False	False	True
ENSG00000079462	0.0703920451329	0.0013149911583	0.0013149911640199998	0.00131499116171	0.0168217122169	0.001314991177	0.907526277989	10444447068100.0	21967162.1261	0.147119002399	0.726413942518	0.742610652663	0.8709024079209999	Q15102	Q15102	PAFAH1B3	0.31068900805300004	0.052615604757	0.24075790158799998	0.00334908249679	0.39258840310599996	16.824193291700002	36.994322550999996	0.110874594835			0.977409051959	ENSG00000079462	0.116346685025	0.162137321236	23.520870214299997	202.0	False	False	False	False	False
ENSG00000079616	0.0033283487501100002	0.0195343791097	0.00332834869516	0.21436702519900003	0.159559061576	0.0033283487153	0.596554487954	7440226942280.0	24224580.8486	0.11259959281300001	-0.022233654070700003	0.5048012003	0.8811792063609999	Q14807	Q14807	KIF22	0.303900149269	0.0057450115097	0.00574501150807	0.0680477993515	0.6165620283609999	8.84785054572	32.3249403449	0.0920197728712			0.9732608865000001	ENSG00000079616	0.35647552117700004	0.347533137865	22.7508158776	202.0	False	False	False	False	False
ENSG00000079691	0.00775806619102	0.007758066156100001	0.007758066158020001	0.0077580661543200004	0.208415222206	0.0728711431542	0.68768136998	7170580876000.0	34147491.0259	0.07841847090989999	-0.9845604628489999	0.154163540885	0.912159627935	Q5VZK9	Q5VZK9	LRRC16A	0.378710035417	0.204884516072	0.0015660195781700002	0.0015660195009200002	0.41327340943199997	2.8178652679000002	9.570833851089999	0.175392224014			0.9020409753059999	ENSG00000079691	0.199194882095	0.136230293807	24.558603726199998	202.0	False	False	False	False	True
ENSG00000079739	0.0295215046664	0.000971655331067	0.0009716554604839999	0.15650616501599998	0.233751081599	0.0681244525798	0.510153485348	68602438180500.0	44315141.3508	0.186903587149	1.63503717044	0.8971492873219999	0.933838421724	P36871	P36871	PGM1	0.224231668547	0.280842341835	0.31157792329	0.00023146154227000003	0.183116604785	61.633032855100005	23.2627479223	0.33747822398500005			0.9598036924519999	ENSG00000079739	0.562993261833	0.393232890841	23.6245188217	202.0	False	False	False	False	True
ENSG00000079785	0.004325444713600001	0.00432544475058	0.004325444751289999	0.00432544513949	0.11622271766100001	0.0043254447529	0.862150058231	286312286568000.0	160643534.995	0.105331129278	-0.0528629211485	0.493323330833	0.984622308904	Q92499	Q92499	DDX1	0.572174525068	0.043844539970699994	0.0017698804214000001	0.0017698804186800001	0.38044117412100004	52.02015244729999	48.111492627299995	0.149912200651			0.9833878632080001	ENSG00000079785	0.242691004632	0.177526048629	26.2613179625	202.0	True	False	True	False	False
ENSG00000079805	0.00797238667564	0.0079723864504	0.007972428069949999	0.0940964599241	0.0842571107419	0.0632709341734	0.7344582939650001	13118077465400.0	48338867.2696	0.07492704865830001	-0.9605372830490001	0.160015003751	0.9383392093619999	P50570-4	P50570	DNM2	0.46218230751199996	0.27638303463	0.007114714552729999	0.00711471459881	0.247205228706	0.793388877358	10.898456660299999	0.0817293513985			0.9124016514759999	ENSG00000079805	0.08234022549169999	0.0847773688494	25.2098292907	202.0	True	False	False	False	False
ENSG00000079819	0.036012488895	0.00332290879969	0.00332290895046	0.101435602193	0.47077172398	0.024595644035099996	0.5346892146500001	114744129632000.0	87069353.8491	0.208489014719	1.17952517294	0.834958739685	0.9679693946439999	O43491	O43491	EPB41L2	0.611941723951	0.0008798869889389999	0.000879887051028	0.000879886985709	0.385418615023	17.4899762501	17.3203130376	0.241456484344			0.9445353275689999	ENSG00000079819	0.529212257793	0.49087408555	25.0849049411	202.0	False	True	True	True	True
ENSG00000079950	0.00126594820651	0.00126594780786	0.6928110889910001	0.011931966586500002	0.0245621783408	0.00126595593793	0.266896914129	779759791032.0	6573322.85511	0.134336941008	-0.198121295089	0.43653413353299997	0.712249643688	O15400-2	O15400	STX7	0.14626523597000002	0.0566878377013	0.006102363193990001	0.0390120530551	0.7519325100800001	0.168571820989	3.5502897347699998	0.11564548781600001			0.820694087404	ENSG00000079950	0.0454296405013	0.0731733406257	22.498212289	202.0	True	False	True	False	False
ENSG00000079999	0.0422862975335	0.00212560399329	0.0021256039998	0.00212560398798	0.452678019214	0.00212560399446	0.49653326727700003	2348857343940.0	10203596.9663	0.150201761017	0.445196860707	0.668042010503	0.774210486835	Q14145	Q14145	KEAP1	0.166830850956	0.134910959002	0.25620241631900004	0.00224637596028	0.439809397763	4.92594211883	14.692086208900001	0.151064070995			0.934194126354	ENSG00000079999	0.36933898261	0.37389566751599995	21.7578751034	202.0	True	False	True	False	True
ENSG00000080200	0.000778893270163	0.0735526003081	0.000778893189868	0.000778893670656	0.000778895726897	0.06661831038369999	0.856713513451	597189109302.0	2968308.56361	0.26034359315600003	1.0146362139799998	0.805026256564	0.587427799865	Q68DQ2	Q68DQ2	CRYBG3	0.07674701038110002	0.007982642982439999	0.41719303749200004	0.0923686990907	0.405708610054	0.669431580589	3.22621399948	0.253606235118			0.813293604425	ENSG00000080200	0.147906809414	0.174079738931	21.1396173042	202.0	False	False	False	False	False
ENSG00000080298	0.00286049232119	0.00286049232608	0.00286049232153	0.0028604923205700003	0.156446622066	0.0028604923210799995	0.829250916324	84554967068.0	2304466.7727	0.126182495396	-1.43104607044	0.060690172543099996	0.54204485785	P48380-2	P48380	RFX3	0.00120889779637	0.016351513795	0.14989336714	0.0012088977959999999	0.8313373234729999	0.45756004476000006	2.5905983621	0.261110273876			0.797616265483	ENSG00000080298	0.08873413670800001	0.0761775057874	20.9560562138	202.0	False	False	False	False	False
ENSG00000080345	0.00644708689613	0.0631008199653	0.00644708691232	0.0064470868905000004	0.0321751482509	0.006447087075399999	0.878935684009	56052640585200.0	88961036.1297	0.0841585425502	-0.559020145529	0.296549137284	0.96864451279	Q5UIP0	Q5UIP0	RIF1	0.45870836964199996	0.139904291706	0.133643668882	0.0012722128944400001	0.266471456876	5.72737312694	13.4370893877	0.17810353215500002			0.927981615642	ENSG00000080345	0.214967897423	0.101820947523	26.0129832663	202.0	False	False	True	False	False
ENSG00000080371	0.0116762583979	0.137178583362	0.00435129357062	0.00435129304196	0.07560963748869999	0.0043512931127	0.7624816410259999	1400804761680.0	11668841.6179	0.10142874677699999	-0.594528417869	0.283645911478	0.7925887030230001	Q9UL25	Q9UL25	RAB21	0.205461153763	0.057137119467199994	0.4512279781600001	0.0027048111236899998	0.28346893748700003	0.797329413813	7.949958400660001	0.1123192091			0.8863831113189999	ENSG00000080371	0.0591900948079	0.039687882049099996	23.3463523711	202.0	False	False	False	False	False
ENSG00000080546	0.15468911215199999	0.00556178619435	0.014059725601600001	0.127329673601	0.139979493269	0.0009005751597959999	0.557479634022	156379337241.0	1966597.42695	0.20108247288800002	-0.252409476343	0.417179294824	0.51263971195	Q9Y6P5-2	Q9Y6P5	SESN1	0.151056452951	0.00077806435797	0.203821194977	0.0528829574376	0.591461330276	4.2607378487	8.426497705060001	0.24496007155000002			0.8915244994939999	ENSG00000080546	0.364269405607	0.33770377382100003	19.7759724633	202.0	False	False	False	False	False
ENSG00000080603	0.00420346774127	0.0042034677208	0.146564949024	0.00420346774426	0.116837872394	0.00420346772378	0.719783307652	3208954287280.0	19572708.93	0.09152312229189999	-0.68061431906	0.253713428357	0.857024979371	Q6ZRS2-2	Q6ZRS2	SRCAP	0.43700470133100006	0.385025578008	0.0010968587936099998	0.00109685879337	0.175776003073	3.0057820433099995	9.35582309294	0.18530909776700003			0.900210329516	ENSG00000080603	-0.0291928501638	-0.027219578489599997	24.305608511	202.0	True	False	False	False	False
ENSG00000080608	0.0163730661126	0.00463738951771	0.004637389497420001	0.0671806802974	0.00463739325841	0.033506388444500004	0.869027692872	11565653198300.0	34341631.2946	0.0990294031725	-0.309505739035	0.395873968492	0.9127597329530001	Q15397	Q15397	KIAA0020	0.22895866998599998	0.0034406803777600006	0.0422097633397	0.0034406798528999996	0.721950206444	9.45183156293	25.398251716599997	0.12104703715			0.963484458986	ENSG00000080608	0.227110327868	0.182215457864	24.1572911058	202.0	False	False	False	False	False
ENSG00000080709	0.00104611624456	0.0010461164236300001	0.124922673836	0.00104611664496	0.0010461170864	0.047117404169999995	0.823775455595	67209490235.0	886578.182758	0.292414066825	0.23659278848700002	0.598649662416	0.335458705273	Q9H2S1	Q9H2S1	KCNN2	0.312446798964	0.040657169953099995	0.0007094870466419999	0.0273328243048	0.618853719731	2.3858297695900004	4.98139943579	0.310076147379			0.847589000545	ENSG00000080709	0.35669654031099995	0.36016522548	18.8021229881	202.0	False	False	False	False	False
ENSG00000080802	0.0042511938302399995	0.0624750401644	0.004251193966219999	0.004251193865219999	0.0748741858285	0.0042511938335	0.845645998512	501289847325.0	6463432.14146	0.10954215005699999	-0.7963640561390001	0.212078019505	0.7096241842319999	O95628-8	O95628	CNOT4	0.26878613756999997	0.008289939638369999	0.48887260093900003	0.017857682881599998	0.21619363897100002	0.24663774494600002	4.93180188666	0.100698765874			0.846712627561	ENSG00000080802	-0.0115491627896	-0.0119294204457	22.6307785381	202.0	False	False	False	False	False
ENSG00000080819	0.00429047353082	0.00429047359249	0.00429047347798	0.00429047353827	0.291916019348	0.0174410989644	0.6734809875480001	4005547629770.0	18954419.2172	0.10558943558	-0.281222746986	0.40652663165799996	0.8535743755159999	P36551	P36551	CPOX	0.16991773391399997	0.0423226088442	0.0048052645435800005	0.00480526453946	0.778149128159	1.72351979742	11.9603550763	0.109765046343			0.9187894367839999	ENSG00000080819	0.114961856983	0.106707524236	23.7722841361	202.0	False	False	True	False	True
ENSG00000080824	0.076282063942	0.0124028359594	0.00199777361663	0.00199777362042	0.011126046357200001	0.0310430001917	0.8651505063130001	5693542933830000.0	505659262.808	0.149222163658	0.43022445670500004	0.663465866467	0.997824619308	P07900-2	P07900	HSP90AA1	0.40164157956	0.00195606058614	0.0019560605862	0.00195606058612	0.592490238682	6352.01960895	443.220307633	0.179819284058			0.999143101971	ENSG00000080824	0.328523815766	0.314301786279	26.1709816713	202.0	True	False	False	False	False
ENSG00000080845	0.0205670167905	0.00211231081902	0.00211230960181	0.0838853373349	0.00211231000736	0.0021123096109300003	0.887098405836	1130616942950.0	7693368.4100399995	0.13821055623	-0.023076537613400002	0.504426106527	0.735053634386	Q9Y2H0	Q9Y2H0	DLGAP4	0.30546286587	0.00176557946577	0.132819088878	0.0017655794617400002	0.5581868863239999	3.1743950334099997	11.6149871623	0.153395193418			0.916958790995	ENSG00000080845	0.36158958858199997	0.37503737142899995	21.480475599800002	202.0	False	False	False	False	False
ENSG00000080986	0.0244178273621	0.0232733658648	0.0089125723863	0.00891257459147	0.11552250017799999	0.034145875734099995	0.784815283883	4177776322620.0	29292294.5044	0.0697781097105	-1.36055984139	0.0708177044261	0.899557422549	O14777	O14777	NDC80	0.265951639686	0.00161740538478	0.15814209009000002	0.190116641747	0.38417222309199994	8.92896354732	18.578723526199997	0.160836514544			0.9483718937450001	ENSG00000080986	0.126066330102	0.0794271739719	24.448566896	202.0	True	False	False	False	False
ENSG00000081014	0.00222440134848	0.0022244013378200003	0.00222440197954	0.00222440184567	0.0022244013381799996	0.00222440136236	0.986653590788	111351387980.0	2153556.79086	0.15494996715	-0.919533402537	0.174193548387	0.5301177706100001	Q9UPM8	Q9UPM8	AP4E1	0.34220248834100003	0.148222221543	0.0020674226871	0.00206742267494	0.505440444754	0.34217178988799996	3.09123017699	0.189230334208			0.8104697359199999	ENSG00000081014	0.00629027194433	0.00966686428067	20.9726493059	202.0	True	False	False	False	False
ENSG00000081087	0.00226724701366	0.0397303104438	0.00226724721713	0.0022672467977199995	0.00226724724756	0.00226724724615	0.9489334540340001	30924382477.2	1247113.65434	0.141008237347	-1.6742946135799999	0.032108027006799995	0.417072987773	Q86WC4	Q86WC4	OSTM1	0.217494231186	0.00220016523886	0.00220016627583	0.0825310477873	0.6955743895119999	0.983760677409	5.257101559380001	0.18866805075800003			0.851737166005	ENSG00000081087	0.275492136727	0.332231744831	19.317207999100003	202.0	False	False	False	False	False
ENSG00000081154	0.0933847619355	0.0016693214280699999	0.00166932139529	0.00166954235197	0.0534919582868	0.0192561087192	0.828858985883	31042475540300.0	39023521.6434	0.142774850619	0.795604845973	0.760465116279	0.9245367939390001	Q8WW12	Q8WW12	PCNP	0.44483003450099995	0.10076592634999999	0.00474561741445	0.036860851541199995	0.412797570193	48.6963777729	71.38666596680001	0.0977532555054			0.9894445742769999	ENSG00000081154	0.046314019854699996	0.0731352385801	24.7371806896	202.0	False	False	True	False	False
ENSG00000081177	0.00135374916719	0.286313796927	0.151713556679	0.00135375214405	0.0279674715499	0.0013537492555799999	0.529943924277	3028259340530.0	12022984.5214	0.14473855907	0.447658139271	0.668942235559	0.796489385642	Q9NVH0	Q9NVH0	EXD2	0.0396086178107	0.0186678769715	0.503065072243	0.00966884578372	0.428989587191	0.8559556647200001	8.15589849468	0.113436762488			0.888252707019	ENSG00000081177	0.0168916201311	0.0240651433581	23.4424961374	202.0	False	False	False	False	False
ENSG00000081181	0.030020779954599997	0.000981593458256	0.00098159337132	0.000981592394148	0.355348141633	0.000981591842095	0.610704707347	10247921038300.0	17408501.7519	0.18388931273899997	1.2827715899799998	0.851537884471	0.843072537694	P78540	P78540	ARG2	0.305476995157	0.00278930526848	0.0749738040765	0.00278930613868	0.6139705893590001	8.396049579249999	22.4071505258	0.129315584034			0.957895146841	ENSG00000081181	0.44270251256399995	0.7094353149179999	20.7437296725	202.0	False	False	True	True	True
ENSG00000081307	0.00216114141756	0.00216114141011	0.0993021060645	0.00694392824274	0.06314683572219999	0.0057067441106800005	0.8205781030320001	2625432298510.0	12448528.435999999	0.130161455441	0.158675492225	0.573968492123	0.801065186408	Q9GZZ9	Q9GZZ9	UBA5	0.562085148496	0.0179500156118	0.00893509819355	0.00893509814939	0.402094639549	0.38347938350199995	7.56588758328	0.08184857565880001			0.882195995949	ENSG00000081307	0.183758312849	0.398645970256	22.3190705313	202.0	False	False	False	False	False
ENSG00000081721	0.0533743095003	0.0025811514685900004	0.0025811514044899995	0.0253714816931	0.00258115153961	0.00258115138987	0.910929603004	338248610761.0	4417129.07763	0.131667297102	-0.584003502382	0.287771942986	0.653739404396	Q9UNI6	Q9UNI6	DUSP12	0.0785680166126	0.0011708060475299998	0.620441878564	0.020192013069999997	0.279627285706	3.64646746792	10.3867633712	0.183846740272			0.908311910883	ENSG00000081721	0.286438084038	0.253981856729	21.1568976211	202.0	False	False	True	False	False
ENSG00000081760	0.00206182584172	0.06734904689770001	0.00206182563795	0.00206182572968	0.383383809755	0.00206182565465	0.541019840484	8018268988740.0	16933841.4511	0.167218691796	0.997330981098	0.8023255813950001	0.839246868202	Q86V21	Q86V21	AACS	0.6974498569679999	0.0014640151930000002	0.00146401553505	0.038462697639900005	0.261159414664	1.01382179265	4.31319011604	0.23344372786999998			0.835709277869	ENSG00000081760	0.5263378751359999	0.5728392722410001	22.6086950318	202.0	False	True	True	True	True
ENSG00000081803	0.023995536086900002	0.010850014432999999	0.0015338606537200002	0.00153386152543	0.149392487948	0.119969874629	0.6927243647239999	108871315492.0	1890846.5702400003	0.174502014577	-0.6890596968639999	0.250037509377	0.506038556747	Q86UW7-2	Q86UW7	CADPS2	0.481692720774	0.0009772177606030001	0.000977217851074	0.033258366381099996	0.48309447723300003	2.8229372016000003	6.008954124240001	0.279609369465			0.8625652411	ENSG00000081803	0.471825638251	0.457603584564	19.552549681400002	202.0	False	False	True	True	False
ENSG00000081870	0.0007478452175089999	0.024642994199000002	0.0642040134164	0.0073855084574000005	0.0007478452086589999	0.025727825592	0.876543967909	621166698904.0	3177618.79172	0.248028900067	0.9497467129989999	0.7924231057760001	0.600855149651	Q9Y547	Q9Y547	HSPB11	0.19455739696600002	0.165157328883	0.479777097501	0.00136851350394	0.159139663147	0.9417364933840001	6.000169951749999	0.161733933233			0.86252629119	ENSG00000081870	0.13173385286699998	0.240909667353	20.8939996131	202.0	True	False	False	False	False
ENSG00000081913	0.0019406768257899999	0.00194067684969	0.00194067682137	0.193476766208	0.00194067681875	0.00194067685146	0.7968198496250001	624811692182.0	5474113.31799	0.144397871186	-0.110248933295	0.47314328582099996	0.685319930988	O60346	O60346	PHLPP1	0.39795323300499996	0.00221792611774	0.00221792617994	0.0022179261978400003	0.5953929885	3.6662930097000004	11.962749759600001	0.160059909596			0.9188089117399999	ENSG00000081913	0.25752400038	0.287889351936	21.2906034943	202.0	True	False	False	False	False
ENSG00000082068	0.0438354617165	0.005992486434739999	0.00599248598928	0.09359374514	0.00599248616221	0.0059924859518000004	0.838600848605	2310424529120.0	18319799.2545	0.08297078192030001	-0.991639333008	0.152063015754	0.849523666642	Q9NW82	Q9NW82	WDR70	0.356530205779	0.005981172288949999	0.00598117207274	0.144509942121	0.486997507739	0.40551847670900004	6.58654680256	0.0966824264129			0.8709978967049999	ENSG00000082068	0.138906348052	0.132356915006	23.7251204961	202.0	False	False	False	False	False
ENSG00000082153	0.0236932998196	0.00316893964094	0.00316894077553	0.0031689400337600003	0.00316894047792	0.00804246156621	0.955588477686	17438089572700.0	37492472.8924	0.111379526154	0.0616935854882	0.537959489872	0.920711124447	Q7L1Q6-4	Q7L1Q6	BZW1	0.225764954987	0.0033547091583499998	0.279290045752	0.019000899798599997	0.472589390303	152.958953243	76.1525028957	0.162406448619			0.990398847083	ENSG00000082153	0.143132004706	0.0647600820994	24.7403876367	202.0	True	False	False	False	False
ENSG00000082212	0.0056350321701699995	0.005635032249979999	0.005635032261720001	0.0660365031931	0.124516750238	0.0056350322032700005	0.7869066176839999	11075936644600.0	38812913.3944	0.0857460234233	-0.678167831486	0.254688672168	0.924011702048	P23368	P23368	ME2	0.17524309143	0.00265690196138	0.32224628612399997	0.0266622876962	0.473191432789	11.730429936099998	30.8440525725	0.111041553808			0.9714497156659999	ENSG00000082212	0.196581168839	0.143170891303	24.504568746599997	202.0	False	False	True	False	False
ENSG00000082213	0.0284303336069	0.00151671364198	0.00151671402469	0.00151671365292	0.00151671385632	0.0278988562885	0.937603954929	350834919305.0	4176020.8644199995	0.141836741919	-0.426190751906	0.348987246812	0.643462605956	Q49AR2	Q49AR2	C5orf22	0.5403005544439999	0.00397099539948	0.00397099539931	0.00397099539933	0.447786459358	2.1703105044099997	12.6306355378	0.11663683669399999			0.922957077199	ENSG00000082213	0.184890628084	0.354565825078	20.6154678833	202.0	False	False	True	True	False
ENSG00000082258	0.00259129103616	0.0678284217229	0.0326277522881	0.00259129103559	0.0334807866451	0.00259129103783	0.858289166234	74583999197.9	1969731.57655	0.138648694982	-1.32408472156	0.0774193548387	0.512939764459	O60583	O60583	CCNT2	0.34177341441799997	0.00376056469156	0.00376056469232	0.00376056469147	0.6469448915070001	1.21070930573	9.03690055018	0.121758821882			0.8972696112799999	ENSG00000082258	0.10187409632099999	0.158344097673	20.355563879	202.0	True	False	False	False	False
ENSG00000082458	0.0818783221126	0.0012891886054600002	0.00128918858267	0.00128918858586	0.0012891885835399999	0.0012891885848299999	0.911675734945	968285971941.0	5616332.175340001	0.175206023933	0.467704884085	0.673818454614	0.6889205610979999	Q92796	Q92796	DLG3	0.0027960209698000005	0.240060479251	0.00279602093582	0.028099839983799998	0.7262476388600001	1.7845383232799998	9.464921090499999	0.141138644419			0.901067227545	ENSG00000082458	0.589487688437	0.8297040773250001	19.5892881768	202.0	False	False	False	False	False
ENSG00000082512	0.0013452412377100002	0.00134524123799	0.0013452412390899998	0.00134524127526	0.09623699087300001	0.00134524123716	0.8970368029000001	54892904738.5	1033669.13605	0.22666087309500002	-0.387541448757	0.364141035259	0.373640387068	O00463	O00463	TRAF5	0.0267377482386	0.08504819589160001	0.0015668642226199998	0.0015668641161	0.885080327531	0.690579027339	4.065683100019999	0.204396364955			0.831035288619	ENSG00000082512	0.07067351650489999	0.08303058834049999	19.7503809588	202.0	False	False	False	False	False
ENSG00000082515	0.0032120647537	0.00321206475393	0.0032120647536799996	0.0450443451688	0.246493975869	0.044080012397999996	0.6547454723030001	1753830577680.0	11652923.2866	0.113647250035	-0.266976901494	0.411402850713	0.792513689896	E7ESL0	E7ESL0	MRPL22	0.290720443172	0.031912017613499995	0.093662459861	0.0031534930682	0.580551586285	1.09577242128	7.33603012108	0.14269181991399998			0.8794305523100001	ENSG00000082515	-0.06682677719619999	-0.0747431348173	23.695106304499998	202.0	False	False	False	False	True
ENSG00000082516	0.07983034365339998	0.00736962403318	0.0073696252076	0.00736963492487	0.007370177508359999	0.030081716370099997	0.8606088783020001	28956474541900.0	69090204.3443	0.077885455737	-0.757720383531	0.224981245311	0.9576925962039999	Q8TEQ6	Q8TEQ6	GEMIN5	0.273032180952	0.360776072541	0.00173607503871	0.00173607508871	0.36271959638000006	3.9619988793300003	12.9564095095	0.15362875391699998			0.925040897406	ENSG00000082516	0.15587498714700002	0.0830329691831	25.719082006500003	202.0	True	False	False	False	False
ENSG00000082701	0.0492545944659	0.00634731431889	0.00634731469895	0.00634732078946	0.006347314290680001	0.00634731436906	0.9190088270669999	1623473776840.0	15050017.7809	0.0846614351124	-1.00711276013	0.147336834209	0.8244692821240001	P49841	P49841	GSK3B	0.22055505538800002	0.190542244186	0.27155367936299996	0.00165364962607	0.315695371437	4.00567173854	13.9776018648	0.143187468903			0.9309223338789999	ENSG00000082701	0.0142134472733	0.0116134807936	23.7878641367	202.0	True	False	False	False	False
ENSG00000082781	0.047087307483199996	0.00099566313679	0.011105529464100001	0.000995663136432	0.000995665741248	0.000995663143431	0.9378245078949999	13912667052000.0	16509528.8956	0.225928238	1.8562046020599996	0.918229557389	0.8360213037279999	P18084	P18084	ITGB5	0.247124618757	0.000638042043549	0.0006380420466159999	0.101594038398	0.650005258754	80.4312472008	29.6035415391	0.302948447857			0.969950144115	ENSG00000082781	0.597729022573	0.448338540272	21.722779396999996	202.0	True	False	False	False	False
ENSG00000082898	0.047310030718	0.0316333713203	0.0061405633281	0.07248754709369999	0.00614056442775	0.021300944726100002	0.814986978386	169686728779000.0	157031603.79700002	0.082953912161	-0.7352530532420001	0.231882970743	0.984322256395	O14980	O14980	XPO1	0.424998303615	0.244820536803	0.00234028369065	0.05320004629030001	0.274640829601	62.325279396099994	62.5313608317	0.126250828552			0.9875555036220001	ENSG00000082898	0.38040578354800003	0.290798765958	25.4817481783	202.0	True	False	False	False	False
ENSG00000083123	0.00167144948975	0.069534197189	0.00167144817465	0.0016714483528	0.00167144881479	0.0016714494819200002	0.922108558497	3131203115990.0	11163035.0713	0.158516082589	0.666585275313	0.727606901725	0.786362613457	P21953	P21953	BCKDHB	0.0175908677312	0.00262799992391	0.00262799992291	0.117492486458	0.8596606459639999	2.03748280707	9.50837139602	0.150120789405			0.9014567266500001	ENSG00000083123	0.297266196223	0.357612624253	22.1809580387	202.0	False	False	False	False	False
ENSG00000083168	0.00039533730819800005	0.000395337336151	0.486921942496	0.000395337341427	0.26286528320999997	0.00039533733153800007	0.24863142497699997	200601018576.0	2235424.70003	0.200357923316	-0.134265675886	0.463990997749	0.536643912685	Q92794	Q92794	KAT6A	0.235962742172	0.193929414399	0.277179962596	0.0009060694244830001	0.292021811409	1.5627395261	6.251010320569999	0.19998300157200002			0.866031783127	ENSG00000083168	0.0158637868562	0.0292971410498	20.9617177893	202.0	True	False	False	False	True
ENSG00000083223	0.0037948155999999998	0.00379481535317	0.0037948152506900004	0.00379481581616	0.0037948882769299995	0.0248475641773	0.9561782855259999	1562416101880.0	8636190.52813	0.144735857347	0.19900354524099997	0.587621905476	0.751856574901	Q5VYS8	Q5VYS8	ZCCHC6	0.303730683993	0.0037643567667700003	0.0962945031868	0.0333825419033	0.56282791415	0.41559224368500003	5.0662419755400006	0.127247069093			0.848874347589	ENSG00000083223	0.214191552489	0.207483898136	22.4881907206	202.0	False	False	True	False	False
ENSG00000083307	0.00272048448637	0.00272048448584	0.00272048448583	0.0027204844858800003	0.00272048448583	0.0214356278169	0.964961949753	734907223637.0	6832973.45427	0.125460358617	-0.372488208225	0.370667666917	0.7178006151080001	Q6ISB3	Q6ISB3	GRHL2	0.47141819865199996	0.031738586623800004	0.00181390893428	0.0018139089307699998	0.493215396859	1.55350688269	7.05904659286	0.176567408312			0.8763729843420001	ENSG00000083307	0.471775542933	0.38978430448600004	21.5279828939	202.0	False	False	False	False	False
ENSG00000083312	0.0104832871681	0.0360197398524	0.010483282847799999	0.08230524814489999	0.010483303752799999	0.0104832857845	0.839741852449	26651420767200.0	82619981.7435	0.0624849013167	-1.40610156822	0.0637659414854	0.965493961443	Q92973-2	Q92973	TNPO1	0.501431462198	0.102824441416	0.0666034036282	0.0014796158517499998	0.327661076906	26.3861892091	32.2772176709	0.159144723912			0.9731829866789999	ENSG00000083312	-0.0275444593238	-0.0115145984697	26.356668296	202.0	False	False	False	False	False
ENSG00000083444	0.00260527856555	0.012497670765400001	0.00260527856361	0.020497516934	0.194316235793	0.0165736737416	0.750904345637	9144305520020.0	22258238.1785	0.135857800298	0.5004031343909999	0.681995498875	0.872702722977	Q02809-2	Q02809	PLOD1	0.368482419581	0.0445670786508	0.13823209620500002	0.0356522658055	0.413066139758	8.62209296877	16.1434861577	0.18189008463599998			0.9405040118410001	ENSG00000083444	0.426097242926	0.365566649792	22.898263408200002	202.0	False	False	True	False	False
ENSG00000083520	0.054134015560800004	0.014134449061200002	0.0141344490611	0.0141344490958	0.243832088556	0.0141344492231	0.645496099442	8344222159620.0	51836720.2491	0.055725684735	-1.78349095502	0.0236309077269	0.94253994449	Q9Y2L1	Q9Y2L1	DIS3	0.40017135009800003	0.271696069847	0.00393590037993	0.0171700031191	0.307026676556	1.74988851012	12.742949776500001	0.103809050404			0.9236971254970001	ENSG00000083520	0.233471889556	0.161342497382	25.0155261586	202.0	True	False	False	False	True
ENSG00000083535	0.259095546131	0.00291037933182	0.0029095775513	0.0029094561871199996	0.147250419481	0.0029094558788899994	0.582015165439	263792196389.0	4192137.5177300004	0.122516745348	-0.844948801392	0.195948987247	0.644062710974	Q8WXW3	Q8WXW3	PIBF1	0.262467245624	0.0382839927765	0.207508039972	0.0228603234552	0.468880398173	0.511875738796	4.93313674879	0.145030424618			0.8467710524269999	ENSG00000083535	0.266130744497	0.263089825341	21.3166720014	202.0	False	False	True	True	False
ENSG00000083544	0.00247590976132	0.0024759084158899997	0.0024759081879	0.00247590884671	0.00247590888524	0.00247590845819	0.985144547445	354302412984.0	3967795.76465	0.15001605672499999	-0.308009650685	0.396549137284	0.634836096317	Q9H7E2-3	Q9H7E2	TDRD3	0.018158557375900004	0.0141143015304	0.677297127104	0.0010020497673900002	0.289427964222	0.9484991509540001	5.93878489924	0.163991326064			0.8613577938770001	ENSG00000083544	0.136257404952	0.167971980268	21.4094862321	202.0	False	False	False	False	False
ENSG00000083635	0.00238369896433	0.00238369882742	0.050540599211	0.0023836989057	0.00238369887667	0.00238369883397	0.937540906381	464534781868.0	4984432.66973	0.136739310201	-0.348554395578	0.379144786197	0.671967594329	Q9UHK0	Q9UHK0	NUFIP1	0.38830981738000003	0.00503049316031	0.00503049317245	0.00503049314154	0.5965987031459999	1.4184057610499998	11.717863765599999	0.101636990918			0.9174261899200001	ENSG00000083635	0.16608113015	0.241180092399	21.340565660899998	202.0	False	False	True	False	False
ENSG00000083642	0.0073646635006899995	0.00736466346424	0.00736466346457	0.125970638228	0.209028320853	0.007364663591490001	0.635542386897	22049129721800.0	60373812.7504	0.077776272049	-0.774091668089	0.21957989497400002	0.9510914410019999	Q9NTI5-2	Q9NTI5	PDS5B	0.35951573376199997	0.102038630275	0.0414954359402	0.00250570112979	0.49444449889200004	0.78462724314	5.9220086291900005	0.149576255111			0.8611240944149999	ENSG00000083642	0.09313011086589999	0.0581235714671	25.684656987199997	202.0	True	False	False	False	True
ENSG00000083720	0.00451690277025	0.034223910063	0.0045169027900299995	0.00451691268215	0.004516927878390001	0.00451690258095	0.943191541235	12123090593200.0	35557037.6912	0.0979221867101	-0.330012556105	0.387396849212	0.916135323682	P55809	P55809	OXCT1	0.335077603342	0.15942248018400001	0.00225973670611	0.0022597360753699998	0.500980443693	3.5694650409099995	12.8358865379	0.147189115976			0.924222949287	ENSG00000083720	0.429927034762	0.335270774554	23.7915942283	202.0	False	False	False	False	False
ENSG00000083845	0.0027842127779000004	0.0381559886214	0.06546450515430001	0.145980561801	0.228010495816	0.0524271935972	0.706572330634	469987177780000.0	157690537.57799998	0.137479318653	0.721185969194	0.7410352588150001	0.9843972695219999	M0R0R2	M0R0R2	RPS5	0.155400201918	0.12118932503699999	0.558271114535	0.00103326295932	0.164106095551	481.745867614	142.847464312	0.153651379367			0.9961829087790001	ENSG00000083845	0.00510035527269	0.0035033234112	27.2107318621	202.0	False	False	False	False	True
ENSG00000083896	0.00795780350671	0.0205916744161	0.00795780361733	0.00795780351513	0.049035161474400006	0.00795780351107	0.898541949959	2813635268150.0	21845850.3059	0.0767829769524	-1.15113878884	0.11215303825999999	0.8700022503939999	J3QR07	J3QR07	YTHDC1	0.238159173153	0.00243390144487	0.502159562443	0.00243390145133	0.254813461508	1.5396184527399999	10.9070244105	0.113762798964			0.9124406013869999	ENSG00000083896	0.0173422542532	0.013057003017799999	24.332171145700002	202.0	False	False	False	False	False
ENSG00000083937	0.0830230268101	0.00242615462879	0.00242615458972	0.047459737626599996	0.057301701344800005	0.0146640405518	0.792699184448	3015058602820.0	14315064.6179	0.12129825863299999	0.013079602302099999	0.517929482371	0.8182431925589999	Q9UQN3	Q9UQN3	CHMP2B	0.43503503531099996	0.011157764642	0.00408833039714	0.00408833021977	0.5456305394300001	8.884778830930001	26.289968280500002	0.113379163521			0.9650619303579999	ENSG00000083937	0.282736118836	0.27841052619199996	22.4267534566	202.0	True	True	True	True	False
ENSG00000084072	0.00398615737125	0.0191187181623	0.00398615737325	0.0039861573727699995	0.213593024344	0.042144361561199994	0.713185423815	1238842304180.0	10966782.4057	0.101491293366	-0.632188606531	0.270742685671	0.784037206511	Q9UNP9	Q9UNP9	PPIE	0.279457708039	0.0979693124722	0.0900241588074	0.00603560812329	0.526513212558	0.193733417555	4.1767435726999995	0.10538151961799999			0.833041209005	ENSG00000084072	0.158232082757	0.21152959693300002	22.8636534716	202.0	True	True	False	False	True
ENSG00000084073	0.00326046080848	0.00310213759662	0.0031021373885900005	0.0031021374623099998	0.0031021392510500005	0.0433766997475	0.940954287745	10953189033000.0	27830890.1625	0.118916794553	0.166704654503	0.5759189797450001	0.895281674293	O75844	O75844	ZMPSTE24	0.190804268449	0.0209891492733	0.276089216127	0.000791145293217	0.511326220857	16.7479477087	17.732064634	0.230792394198			0.945801199657	ENSG00000084073	0.22693256906999998	0.133668731896	24.1469775877	202.0	False	False	False	False	False
ENSG00000084090	0.00196156276952	0.0339997902128	0.00196156266725	0.00196156300027	0.0744628881445	0.00196156266087	0.883691070545	199375148725.0	2991901.99088	0.149240999668	-0.581763012993	0.288747186797	0.5891531017930001	Q9NQZ5	Q9NQZ5	STARD7	0.311527781697	0.261381552937	0.09800516173450001	0.00221694030328	0.326868563328	48.5831003445	54.9710879605	0.126796796293			0.985666432967	ENSG00000084090	0.201172477223	0.297229335328	19.7622919171	202.0	False	False	True	False	False
ENSG00000084092	0.0020529633677	0.00205296352148	0.00205296339507	0.233403863339	0.169390965295	0.00205296419252	0.588993316889	1978552577280.0	10548149.4013	0.133351383369	0.127264648885	0.562040510128	0.7779611432	Q8NC60	Q8NC60	NOA1	0.486416453908	0.00748511484395	0.12350265112400001	0.0490733854096	0.333522394715	8.44382574213	19.5223686034	0.148845984372			0.951371036847	ENSG00000084092	0.23273523090599998	0.23644429993299998	22.262194812399997	202.0	False	False	False	False	False
ENSG00000084207	0.0119456481746	0.0014013966049100002	0.00140139667051	0.00140139662874	0.36250536995800003	0.0631861374844	0.5581586544789999	2524228735080000.0	314943349.165	0.159526160117	0.880178217596	0.7780945236310001	0.995049133598	P09211	P09211	GSTP1	0.306236495027	0.013933024991200001	0.00162057341651	0.0016205734204400002	0.676589333145	2702.35915639	288.703151383	0.180061145902			0.998461478539	ENSG00000084207	0.195689799049	0.214973272326	26.408808136399998	202.0	False	True	True	True	True
ENSG00000084234	0.04223848330519999	0.0590335417068	0.00197129845919	0.00197129849242	0.00197129845684	0.00197129845617	0.890842781123	2794253212660.0	11031460.8342	0.151530428747	0.5284129282760001	0.690472618155	0.7849373640389999	Q06481-3	Q06481	APLP2	0.326633981229	0.111202583068	0.192838741716	0.0017969420319600001	0.36752775195500004	172.762261086	90.03441884870001	0.145987568105			0.9923463426029999	ENSG00000084234	0.291938631863	0.37190633760499997	20.9447262328	202.0	False	False	False	False	False
ENSG00000084444	0.0014982706383199998	0.053718795314499995	0.00149827075618	0.07294111105489999	0.0014982712398900002	0.0014982706637899999	0.867347010332	75897814002.7	1616311.92593	0.17044703716899998	-0.886630943608	0.18477119279800003	0.474758082664	A2RU67	A2RU67	KIAA1467	0.268339231556	0.115842803333	0.233611458077	0.00141249671669	0.38079401031599996	1.4807082117700001	6.9753024346600006	0.17445029171			0.875340811716	ENSG00000084444	0.11605698689300001	0.15846278245200002	20.124870864600002	202.0	False	False	False	False	False
ENSG00000084463	0.0188671770062	0.00531075473584	0.00531074794496	0.00531074843093	0.005310771425109999	0.005310809138869999	0.954578991318	10341153996900.0	32455247.9446	0.09908309671880002	-0.324418382648	0.389422355589	0.908108919061	Q9Y2W2	Q9Y2W2	WBP11	0.426032295366	0.00513515817295	0.0051351582445	0.0143595992251	0.5493377889909999	35.2150512532	60.934770457700004	0.09738655046439999			0.987282854249	ENSG00000084463	0.01307325282	0.013784660520299998	24.8464885888	202.0	True	False	False	False	False
ENSG00000084623	0.0136916714081	0.034278541170799995	0.013691671541600002	0.0136916713457	0.143023486883	0.020003450960599998	0.76161950669	16650811903300.0	68873959.3005	0.05924649432159999	-1.5468391361700002	0.04403600900230001	0.957317530568	Q13347	Q13347	EIF3I	0.0616813123012	0.00264353418444	0.39697222267300003	0.0026435341831799997	0.536059396658	191.878871634	124.207387456	0.11152343843000001			0.99532601075	ENSG00000084623	0.0998981896871	0.0480896874608	25.6941348271	202.0	True	False	False	False	False
ENSG00000084652	0.00406842109533	0.0040684216161	0.00406842196221	0.165603056108	0.0040684241178200005	0.0040684268582	0.814054828242	9037223166610.0	28452440.8777	0.10565692668	-0.169645459069	0.44801200300099997	0.89730702873	P40222	P40222	TXLNA	0.241024359916	0.30607475917	0.276486525693	0.038450037922199996	0.13796431729800002	3.8167340609300004	13.9512100041	0.14003418695800002			0.9307470592820001	ENSG00000084652	0.0811514569123	0.0576752669574	24.5219659029	202.0	True	False	False	False	False
ENSG00000084733	0.006601350897050001	0.0066013509130700004	0.00660135094567	0.00660135089544	0.00660135095338	0.00660135118841	0.960391894207	2677499267400.0	19140860.2534	0.0854876202885	-0.886514829717	0.184846211553	0.854999624934	P61026	P61026	RAB10	0.191743102885	0.017623735068400002	0.10751731646	0.00551185445408	0.677603991133	18.4047832163	48.2195327516	0.0889697469758			0.9834268131180001	ENSG00000084733	0.101257930658	0.118991853192	23.539690034099998	202.0	False	False	False	False	False
ENSG00000084754	0.00477153138499	0.00477153141099	0.00477153138179	0.00477153138232	0.364475854467	0.0047715326632	0.611666487309	142051616863000.0	120591313.496	0.09883415762700001	-0.161979133855	0.45183795948999994	0.9783212062109999	P40939	P40939	HADHA	0.421721321763	0.38889582323	0.00176341323279	0.0017634132671199999	0.18585602850699998	52.459067395699996	56.87755496	0.127341324875			0.986250681623	ENSG00000084754	0.21871052098700003	0.174533881892	25.8293100985	202.0	False	False	False	False	True
ENSG00000084774	0.00429449834387	0.0042944985062399995	0.00429449828358	0.0119073305648	0.00429449933121	0.00429449830523	0.966620176665	512637004543000.0	207911110.338	0.108899849221	-0.04439088944209999	0.496849212303	0.989573175306	P27708	P27708	CAD	0.346466640024	0.429021193626	0.000756564821966	0.00075656482114	0.22299903670600002	45.1686966672	33.728303917199995	0.199261904598			0.974507283633	ENSG00000084774	0.19186745439800001	0.110420477248	27.055888141599997	202.0	False	False	False	False	False
ENSG00000085063	0.0408311893345	0.0020610246523	0.0020610242468199996	0.027654376159399998	0.0363369194795	0.0410661197456	0.849989346382	1771251375490.0	9672819.18071	0.137590050771	0.150027226977	0.571492873218	0.7672342659970001	E9PNW4	E9PNW4	CD59	0.381748041207	0.045355770317400006	0.143237722401	0.0457432223576	0.383915243716	4.352515544019999	13.2856152285	0.157032120375			0.9270273428370001	ENSG00000085063	0.40308089914899997	0.402225099854	21.6330627355	202.0	False	True	True	True	False
ENSG00000085224	0.00262491281327	0.006702274994270001	0.00262491279622	0.383374890092	0.102712775388	0.00262491297807	0.499335320937	8257552164980.0	26687500.8424	0.10767571316199999	-0.129257153897	0.465791447862	0.890330807891	P46100	P46100	ATRX	0.09168258886019999	0.0145050215155	0.8126743183840001	0.00044272920238699995	0.08069534203800001	6.31847314133	13.2814475422	0.189260795239			0.9270078678820001	ENSG00000085224	0.08685450320299999	0.0391505233363	24.5151165657	202.0	True	False	False	False	False
ENSG00000085231	0.0038063906263599997	0.0038063907039	0.0038063905083700004	0.0637741633984	0.191168983355	0.09126988324179999	0.7348005047949999	224627254189.0	4564537.52917	0.186795970232	-0.525216503723	0.30907726931699997	0.658540244543	Q9Y3D8	Q9Y3D8	TAF9	0.440507272301	0.00322528842712	0.00322528839897	0.0048993581833000005	0.54814279269	1.26397109831	7.7372920212	0.145304673677			0.884046116694	ENSG00000085231	0.164641428071	0.328109221792	22.2416785129	202.0	True	False	False	False	False
ENSG00000085377	0.0143518365145	0.0105234231795	0.0030026433574099998	0.00300264335429	0.00300264335442	0.013694925916799999	0.952421884323	57667625990100.0	68554960.2326	0.110771274682	0.25872521736299997	0.606901725431	0.9570924911859999	P48147	P48147	PREP	0.45571170162299995	0.00427064618605	0.0042706461912099996	0.00427064618404	0.531476359816	10.2320873418	30.4974933067	0.104886109034			0.9709628417849999	ENSG00000085377	0.169117142808	0.230304691362	24.871616719400002	202.0	False	True	True	True	False
ENSG00000085415	0.00351105155382	0.024855824696700002	0.0035110516155100004	0.465149493329	0.0682222558324	0.00569088574172	0.429059437231	3236195450150.0	20583709.8721	0.08739643540210001	-0.7957564789110001	0.212378094524	0.8634010951919999	Q96EE3	Q96EE3	SEH1L	0.23236784767700003	0.00412759907988	0.342301399878	0.004127599078119999	0.417075554288	0.671806250495	7.73987532408	0.10589807242900001			0.884065591649	ENSG00000085415	-0.055868807063100004	-0.056264439323500004	24.464285114000003	202.0	True	False	False	False	False
ENSG00000085449	0.00450141133155	0.00450141135509	0.00450141139223	0.050930344175199996	0.0045014116874700005	0.00450141140193	0.9265625986570001	7168775614260.0	26165307.4277	0.102328510292	-0.280771994871	0.406826706677	0.8886055059639999	Q8IWB7	Q8IWB7	WDFY1	0.602689784617	0.0023174655015999997	0.00231746547826	0.00231746551537	0.39035781888800003	20.1418519826	31.741091744000002	0.141392977373			0.972520838202	ENSG00000085449	0.235786031727	0.200985409304	23.599077106	202.0	False	False	True	True	False
ENSG00000085491	0.00102950615515	0.0010295061136	0.00102950611959	0.0010295061197	0.459103905683	0.0010295061121299999	0.535748563697	79816857147200.0	44601194.7949	0.200309164098	1.83803714875	0.91695423856	0.9339884479780001	Q6NUK1	Q6NUK1	SLC25A24	0.738121222212	0.000574091255099	0.000574091397012	0.0005740912554450001	0.260156503881	8.60907259883	9.67699422697	0.30320593858100003			0.9029952481110001	ENSG00000085491	0.67797720182	0.54946511291	23.529843735500002	202.0	False	True	True	True	True
ENSG00000085511	0.17298651227200001	0.00149078909695	0.21543843341899999	0.00149078875695	0.0014907887568599999	0.0014907891289	0.605611898569	4874551060700.0	12150922.0797	0.18170131739999998	1.10926316664	0.8231807951989999	0.79821468757	F5H538	F5H538	MAP3K4	0.39795396109399994	0.00620563807374	0.0024986702531999997	0.096981510441	0.496360220138	2.01123724897	10.0399606532	0.141253637719			0.9057801667059999	ENSG00000085511	0.14740106236199998	0.266301424678	22.5795877482	202.0	False	False	False	False	False
ENSG00000085662	0.0236797027745	0.00103240070824	0.00103240134022	0.0010324007021799999	0.0010324008361499999	0.00103240067913	0.97115829296	233972964064000.0	87119662.4063	0.17557660803	1.5667570398	0.8891222805700001	0.968194434026	P15121	P15121	AKR1B1	0.117407921298	0.00543236177394	0.586360936353	0.017899433979499998	0.272899346596	24.4255088225	38.1800710956	0.129444939542			0.9781491002570001	ENSG00000085662	0.176621745734	0.227457931336	25.135321147800003	202.0	False	False	False	False	False
ENSG00000085719	0.14130330252599999	0.0186571822521	0.00420392690216	0.038817101803699995	0.0472341054505	0.004203926287	0.745580454778	9462333969690.0	34266849.4608	0.08976870486639998	-0.593359218331	0.284396099025	0.912459680444	O75131	O75131	CPNE3	0.49056921974699996	0.110090217866	0.0014442597986700002	0.143166342072	0.254729960516	7.055289062180001	15.9160026375	0.16688734422			0.939666588767	ENSG00000085719	0.0678640119488	0.0549631423439	24.781440476900002	202.0	False	False	True	False	False
ENSG00000085733	0.023313308777900003	0.006360531501979999	0.00636053137995	0.006360531883939999	0.276000309582	0.00636053259164	0.675244254283	55064294399200.0	89739324.7139	0.0826898572303	-0.6114012739670001	0.278094523631	0.969244617808	Q14247	Q14247	CTTN	0.276502139259	0.302394730424	0.004635513343229999	0.012524118628200001	0.403943498346	6.643514811799999	24.893236978	0.103542245757			0.962608086001	ENSG00000085733	0.27349462750500003	0.23273886008900002	25.314416868200002	202.0	True	False	False	False	True
ENSG00000085760	0.00537794980338	0.00537794897717	0.005377948334050001	0.0053779517426899995	0.00537794801163	0.0208447827972	0.952265470334	357952285530.0	6348801.629930001	0.0942368611654	-1.24085993889	0.09227306826710001	0.706548646013	P46199	P46199	MTIF2	0.08368820356250001	0.037758880668599996	0.504438318874	0.0021642591436	0.371950337751	4.93484903231	19.6055796491	0.11330713244200001			0.951565786399	ENSG00000085760	0.118227578632	0.130166354764	22.020270832199998	202.0	True	False	True	False	False
ENSG00000085832	0.0024597355960300003	0.0126663477926	0.41333473592799996	0.00245973279491	0.157387591222	0.00245973745777	0.409232119208	5463625406470.0	19104161.0448	0.122352398531	0.147204701851	0.570292573143	0.8549246118070001	P42566	P42566	EPS15	0.030362629215000003	0.10438423795299999	0.00447072828358	0.00447072844126	0.856311676107	1.93268456531	12.451227256700001	0.11165246852600001			0.921885954662	ENSG00000085832	0.08622893266909999	0.104685896792	23.797818305	202.0	True	False	False	False	False
ENSG00000085840	0.00221807882861	0.0022180788394699997	0.00221807884051	0.0022180789740500004	0.0022180788405500003	0.00221807883162	0.9866915268449999	1069309704270.0	6356926.25517	0.16266891905	0.335053460197	0.633608402101	0.706773685395	Q13415	Q13415	ORC1	0.29931701899	0.523269090315	0.009401885005629999	0.00100422419247	0.16700778149700002	16.4092536694	24.7463241676	0.163694360144			0.962354911584	ENSG00000085840	-0.037595260051300004	-0.04704278983080001	22.809691748899997	202.0	True	False	False	False	False
ENSG00000085872	0.005875561638	0.00587556166833	0.00587556164787	0.0856697117712	0.006702223729859999	0.0426628386177	0.847338540927	15055618947300.0	44655592.1823	0.0868907316651	-0.571282717723	0.292423105776	0.9340634611059999	Q8IWX8	Q8IWX8	CHERP	0.178590857251	0.00721767426555	0.0050048098490899995	0.0193370413867	0.7898496172480001	4.02054894268	19.0693031451	0.105149655418			0.949949365116	ENSG00000085872	0.147106494002	0.134566908077	24.8146355463	202.0	True	False	False	False	False
ENSG00000085978	0.0030980766101700004	0.0030980770137800004	0.00309807659003	0.0030980766499800003	0.36778360559199996	0.025234616224700003	0.594589471319	708043731999.0	6722648.60633	0.125166938566	-0.389097951202	0.363465866467	0.7157752606710001	Q676U5	Q676U5	ATG16L1	0.7615677224940001	0.00154430608725	0.0264587579812	0.030851438515400002	0.17957777492199997	0.9619525281129999	5.09830698974	0.19237597663199998			0.849166471917	ENSG00000085978	0.329484576733	0.248469723378	22.006977025599998	202.0	True	True	True	True	True
ENSG00000085999	0.0009749163367899999	0.0551150068398	0.138483593157	0.0009749163194610001	0.0181752615864	0.000974916319392	0.785301389441	559216296565.0	2828356.0599599998	0.26439657676999995	0.998942061102	0.802700675169	0.579401395244	Q92698	Q92698	RAD54L	0.258707862169	0.0666336231741	0.416496451254	0.0023724549020999997	0.255789608501	3.0698402745599997	14.845999561900001	0.118018053202			0.934719950144	ENSG00000085999	0.03191208602	0.0533652224759	21.1880054823	202.0	False	False	True	False	False
ENSG00000086061	0.004216374016010001	0.00421637414322	0.0268512449461	0.0042163741853	0.135511410476	0.00421637400852	0.820771848225	36750854051000.0	55654062.7496	0.10892732655099999	0.17794497689	0.5809452363090001	0.945990548346	P31689	P31689	DNAJA1	0.134153918641	0.0243583728067	0.257997478801	0.0167778358281	0.566712393924	83.96654730569999	67.4854851921	0.13578217875999998			0.9888019007559999	ENSG00000086061	0.276768594267	0.21790078576900002	24.3967354975	202.0	False	False	False	False	False
ENSG00000086065	0.0005548203788860001	0.0005548204056330001	0.000554820442048	0.04470126000440001	0.0005548205969450001	0.018590793057	0.9344886651150001	1205725282980.0	3060128.2469	0.358826538975	1.9749816988599997	0.9288072018000001	0.592903758158	Q9NZZ3	Q9NZZ3	CHMP5	0.152272173362	0.22131566751899998	0.00292454410976	0.00292454453182	0.620563070478	11.556098028800001	23.718058067399998	0.143326495054			0.9605437407490001	ENSG00000086065	0.0375611675749	0.09909824235169999	21.0087359016	202.0	True	False	False	False	False
ENSG00000086102	0.11638904152999999	0.0024675435509499996	0.0024675435311999998	0.159543931612	0.00246754353588	0.0202929491268	0.696371447114	275739686755.0	4161020.69493	0.126197212804	-0.7665766249349999	0.222355588897	0.642712474683	Q12986	Q12986	NFX1	0.40649095742700003	0.30806928514000004	0.00420954687235	0.00420954687235	0.277020663688	0.551988391517	7.21430518579	0.10298416734799999			0.8780283555349999	ENSG00000086102	0.176282100973	0.38862558480400006	20.7780688852	202.0	False	False	False	False	False
ENSG00000086189	0.033048835098900005	0.06751562217609999	0.00526581979789	0.00526584912658	0.00526582370919	0.0052658220505600005	0.878372228041	3097079743040.0	18487696.6272	0.0951904517371	-0.59118065549	0.285071267817	0.850498837297	Q9UNQ2	Q9UNQ2	DIMT1	0.129346491209	0.00207258404628	0.411522583368	0.0020725839974300004	0.454985757379	2.65057130313	12.1937379421	0.133515869559			0.920113733738	ENSG00000086189	0.264274901098	0.19731471029199998	23.380420468	202.0	False	False	False	False	False
ENSG00000086200	0.0025073109545	0.00250731095043	0.00250731095038	0.29687878942699997	0.00250731095237	0.058053795098599995	0.6350381716669999	8672406433720.0	27540146.8867	0.106930982994	-0.14215558795	0.460540135034	0.89370639862	Q9UI26	Q9UI26	IPO11	0.49876734146000007	0.312815564918	0.0008440038170169999	0.0008440034994800001	0.18672908630499999	5.2361270516100005	12.178651696	0.18789095677499998			0.920055308873	ENSG00000086200	-0.0206499177455	-0.0137689772728	24.7424942133	202.0	False	False	True	False	False
ENSG00000086232	0.107697734509	0.00045869719549199996	0.000458697197295	0.000458697201171	0.00045869719526399995	0.000458697195643	0.890008779506	303364454672.0	2400685.95918	0.229428303662	0.34707731944	0.63728432108	0.55037131498	Q9BQI3-2	Q9BQI3	EIF2AK1	0.5577994085	0.109560917443	0.10449583963999999	0.00501563865743	0.223128195759	8.5077102756	31.6204880384	0.0922439256951			0.9724234634260001	ENSG00000086232	0.26118443896	0.8331326658239999	16.9369728413	202.0	False	False	True	False	False
ENSG00000086475	0.10465078560100001	0.00301864927632	0.00301864927189	0.0233036224865	0.0030186492752099997	0.00301864929297	0.8599709947959999	27824088995400.0	47624245.1191	0.11075985334699999	0.16024199157500002	0.574493623406	0.9375890780889999	P49903	P49903	SEPHS1	0.07762224237639999	0.010196464373100001	0.42835878505900005	0.00047388403864	0.48334862415200003	1930.98071458	165.284191469	0.26586284664099996			0.996786632391	ENSG00000086475	-0.00312824165507	-0.0017224743850799999	25.494521394	202.0	False	False	False	False	False
ENSG00000086504	0.025912392332700002	0.000861358041197	0.000861358100881	0.0836269818911	0.6505148072110001	0.0008613580249239999	0.23736174439899999	2430079088420.0	7117460.68592	0.21902068209699999	1.2595164886299999	0.847561890473	0.724851849074	Q13084	Q13084	MRPL28	0.22015838463100001	0.00239658723362	0.242381798804	0.0023965872343	0.532666642097	17.3949170546	31.2034440604	0.133662213661			0.971819739815	ENSG00000086504	0.0617787739212	0.11202066931500002	22.160847341900002	202.0	True	False	True	False	True
ENSG00000086544	0.017748830185	0.0012512819186300001	0.0012512818786	0.00125128197056	0.00125128188406	0.17154222201900002	0.8057038201440001	64973565901.1	1381336.03901	0.184530861193	-0.8258334108200001	0.20127531883000002	0.439201860326	Q96DU7	Q96DU7	ITPKC	0.463426781527	0.172716601209	0.00355243292027	0.054567326650800003	0.30573685769299996	0.479214397245	5.30310424055	0.13053734180999998			0.852457739347	ENSG00000086544	0.08129859423750001	0.177960947768	19.8692832028	202.0	False	False	False	False	False
ENSG00000086589	0.0436134516232	0.00338458916852	0.0033845893481199998	0.254020641699	0.0033845891689499997	0.11020628332900001	0.582005855663	1875544243250.0	13278189.7665	0.103139443928	-0.483620098846	0.32625656414099996	0.808941564774	Q9NW64	Q9NW64	RBM22	0.20407293412	0.212153883525	0.135224800372	0.0145659826416	0.433982399341	2.04922324563	13.5597444742	0.10557063438400001			0.928780088806	ENSG00000086589	0.00496262747544	0.00523411578704	23.6104278594	202.0	True	False	False	False	False
ENSG00000086598	0.00175230283077	0.0657074917085	0.00175230122156	0.154432775011	0.00175230122248	0.00175230121055	0.772850526795	5312633488070.0	14421697.8412	0.15982272664	0.8115316510930001	0.763990997749	0.819668441977	Q15363	Q15363	TMED2	0.0331826128459	0.0337276340537	0.220541126906	0.0087860064909	0.703762619704	64.8145251763	65.2096428641	0.12345945349700001			0.988392926696	ENSG00000086598	0.00254307536261	0.0038715231404	23.738129459699998	202.0	False	False	True	False	False
ENSG00000086666	0.00249872811873	0.00249872851808	0.00249872810389	0.0024987281309899996	0.176463594535	0.0024987281392399997	0.811042764455	1490106091350.0	9416830.27022	0.129629501911	-0.043826755027	0.497149287322	0.763783662141	Q6FIF0-2	Q6FIF0	ZFAND6	0.29548837281	0.033995910124	0.0026316651871700005	0.0026316652060500005	0.665252386672	13.289500747	24.9540332622	0.146087677025			0.962763885643	ENSG00000086666	0.31216779838500003	0.33202929735500003	21.5799143691	202.0	False	False	False	False	False
ENSG00000086712	0.39179332186	0.0081363089011	0.0014901582197000003	0.179362943428	0.0481639540758	0.004387125890979999	0.36666618762500003	19981248493200.0	31613086.0484	0.141398374531	0.694737890249	0.733908477119	0.9058585252420001	Q9NUQ3	Q9NUQ3	TXLNG	0.09122011461269999	0.0140210468218	0.0706558423311	0.699183524915	0.12491947132000002	53.1017403358	24.1583485367	0.30163875163000003			0.9613227389579999	ENSG00000086712	0.747669796778	0.421582690626	22.9615326618	202.0	False	False	False	False	False
ENSG00000086758	0.00767227211977	0.007672272147719999	0.00767227212175	0.190538384958	0.160046431213	0.007672272135770001	0.618726095304	99518070482000.0	138928633.682	0.07180574772460001	-1.11817214178	0.118904726182	0.981546770685	Q7Z6Z7-2	Q7Z6Z7	HUWE1	0.33224949158000006	0.23995026343800002	0.23307456742600002	0.0005824174723080001	0.194143260084	45.8747771521	32.5238198474	0.20825020470800001			0.9735335358730001	ENSG00000086758	-0.0062856647625900005	-0.00232445734518	27.068322930100003	202.0	True	False	False	False	False
ENSG00000086827	0.009491176965190001	0.00949117696803	0.00949117696405	0.196582394813	0.00949117700539	0.00949117697372	0.7559617203100001	3804556922850.0	29886187.1197	0.0652651787595	-1.5492203519499999	0.043585896474099994	0.9015077638590001	O43264	O43264	ZW10	0.134679559412	0.176530596015	0.207543997667	0.0027279088811399997	0.478517938024	2.8458324415700003	13.9126738798	0.121253436999			0.930571784685	ENSG00000086827	0.197499866093	0.184239922197	24.0899593707	202.0	True	False	True	False	False
ENSG00000087008	0.00147828283289	0.00147828279121	0.00147828278179	0.0014782828033800001	0.22450739972300002	0.00147828277968	0.7681011862880001	215200519066.0	2529035.8020599997	0.183428443075	-0.224246820519	0.42715678919699995	0.55952291651	O15254	O15254	ACOX3	0.5444931477939999	0.00495366578997	0.0049536747872900005	0.00495366550316	0.440645846126	0.126188398597	2.55534310462	0.139014625346			0.796603567812	ENSG00000087008	0.203413953083	0.391121698938	20.5454202178	202.0	False	True	True	True	True
ENSG00000087053	0.00299363858319	0.039527361314199996	0.0029936339368099997	0.0193359224169	0.00299363467855	0.030897421297499998	0.901258387773	801280493005.0	7105163.673389999	0.125984813762	-0.33708491111199995	0.383945986497	0.7244017703100001	Q13614	Q13614	MTMR2	0.394851873072	0.0038087825001799996	0.37333092907399995	0.00380878249091	0.224199632863	2.86381773481	18.2711034774	0.0926206682128			0.9474370958949999	ENSG00000087053	0.0325228099012	0.0374494446862	22.5759307	202.0	False	False	True	False	False
ENSG00000087077	0.00365706827377	0.0756591550098	0.00365706858225	0.00365706828129	0.052354354612499994	0.00365706836407	0.857358216876	11491090209700.0	32744781.0946	0.103523399662	-0.195333719084	0.437659414854	0.9088590503339999	Q15654	Q15654	TRIP6	0.224035953087	0.302689250579	0.171465571584	0.0018768063398900002	0.299932418409	20.0349005765	33.812295131599996	0.13237895386499998			0.974565708499	ENSG00000087077	0.18280461941599999	0.181837787036	24.0176182878	202.0	True	False	True	False	False
ENSG00000087087	0.00865234423843	0.00865234414276	0.00865234432443	0.19746832292	0.00865234416237	0.00865234420832	0.759269956004	35057549553700.0	90824565.0337	0.0651909712774	-1.2998812070899999	0.0820705176294	0.9696946965719999	Q9BXP5-2	Q9BXP5	SRRT	0.00848429736474	0.00109428055294	0.31143653136300004	0.00109428055073	0.677890610169	37.3676150196	31.521176792800002	0.19393012044100003			0.972267663784	ENSG00000087087	0.08317112567089999	0.0319563987041	26.2708040241	202.0	True	False	False	False	False
ENSG00000087088	0.0756418653075	0.00189135972167	0.0018913597231899999	0.0018913597237000001	0.08334368403239999	0.236807697524	0.5985326739679999	4033951029440.0	13633323.6507	0.147320629536	0.555879597321	0.699249812453	0.811792063611	Q07812-2	Q07812	BAX	0.384281399952	0.0014924959868199998	0.0014924971955799999	0.00149249592931	0.611241110936	53.6537256513	38.9932336806	0.18784977954100002			0.978597024227	ENSG00000087088	0.181547810084	0.139586769058	22.9283145248	202.0	True	False	False	False	False
ENSG00000087111	0.00106444179078	0.0381523479407	0.00106444179147	0.426820807305	0.00106444191274	0.0048640382230500006	0.5269694810369999	1294276488810.0	5920884.97992	0.19214403498	0.770472718746	0.7543135783949999	0.696796939464	Q96S52	Q96S52	PIGS	0.402190336633	0.42402229812	0.00100652346712	0.0010065234535	0.17177431832600001	1.87496280167	7.668127321989999	0.178569389016			0.883364493262	ENSG00000087111	0.0952867016351	0.08967186099919999	22.1937773434	202.0	True	False	False	False	False
ENSG00000087152	0.0017167869503099998	0.00171678697641	0.00171678695214	0.0528436225041	0.00171678697002	0.00171678695506	0.938572442692	115624764509.0	1875192.0071	0.18133418613	-0.584120973721	0.28769692423099996	0.504238241692	Q14CW9	Q14CW9	ATXN7L3	0.18162273587900002	0.169817995454	0.331955796099	0.00385730045211	0.312746172117	4.06406338124	21.6544849644	0.0930962906872			0.956200825738	ENSG00000087152	-0.046977849852	-0.09768888177960001	21.2124526093	202.0	True	False	False	False	False
ENSG00000087157	0.0017444438469	0.0481549858904	0.0017444439029500002	0.0017444438465200002	0.183037430349	0.0017444438467599998	0.761829808317	145814431929.0	2131488.042	0.17915022361900002	-0.512013032347	0.31515378844700004	0.5281674293	Q32NB8	Q32NB8	PGS1	0.17093907936099997	0.00257677411752	0.56568094008	0.00257677419456	0.258226432247	0.531521377439	6.543640503150001	0.111414300056			0.8702188984970001	ENSG00000087157	0.123306154892	0.202969240619	20.3827919628	202.0	False	False	True	False	False
ENSG00000087191	0.0402419063027	0.00734981987684	0.007349819878210001	0.00734981988445	0.007349820053399999	0.14442857317	0.785930240835	58837054043600.0	85947713.9452	0.0892464870073	-0.383198182519	0.365866466617	0.967444302753	P62195	P62195	PSMC5	0.29656820690499996	0.00183680324501	0.22382007414799998	0.0858335086739	0.391941407029	18.0358807523	27.270345886799998	0.155732061			0.966503077043	ENSG00000087191	-0.038560539869199995	-0.02253735079	26.4591202756	202.0	True	False	True	False	False
ENSG00000087206	0.000608294294038	0.000608294302802	0.0006082942939919999	0.253516663545	0.113666983976	0.00060829429422	0.630383175294	6578377521240.0	10602360.6418	0.241911672389	1.8495503027900002	0.917854463616	0.779011326982	Q96RL1	Q96RL1	UIMC1	0.246084282059	0.177664751588	0.11802842094100001	0.00474845991881	0.453474085493	0.869425409529	8.86288909238	0.105206082564			0.8958868894600001	ENSG00000087206	0.129190144046	0.28167009360399997	22.394029145100003	202.0	True	False	False	False	False
ENSG00000087258	0.0018264971874400002	0.0018243432204	0.0018243424744500002	0.00182434336573	0.00182434250724	0.00999714920984	0.980878982035	1104703014930.0	6314415.4450900005	0.166452229876	0.39748587559500004	0.653563390848	0.705573475358	P09471-2	P09471	GNAO1	0.24304639251600002	0.157686296008	0.0016954356315199998	0.0016954356388400001	0.595876440206	0.6754869672210001	3.9789891043199996	0.206555011862			0.829302017605	ENSG00000087258	0.445112915371	0.386090369928	21.674400657899998	202.0	False	False	True	False	False
ENSG00000087263	0.00888117465165	0.00223284100643	0.00223284099892	0.31822422506	0.196147966099	0.0022328410011300003	0.470048111183	3954653375200.0	17622746.5445	0.11284455719799999	-0.120932259199	0.46946736684199997	0.844122721476	Q8N543	Q8N543	OGFOD1	0.29694768964699997	0.223164524981	0.00853421065002	0.0085341143578	0.46281946036399996	1.12921757484	13.9347319352	0.0762588401878			0.9306886344159999	ENSG00000087263	0.11214010928200001	0.191751517496	23.297113849699997	202.0	False	False	True	False	False
[truncated: 5,235 more rows]
