# Supplementary material for: Population-scale proteome variation in human induced pluripotent stem cells
Source: eLife. 2020 Aug 10;9:e57390. doi: 10.7554/eLife.57390 (PMC7447446; doi:10.7554/eLife.57390)
Supplement: Figure 1—source data 5. — Correlation with XCI status of protein and RNA profiles for the 6336 genes (6406 proteins) with high RNA expression (TPM >1) and detected in all female lines at the protein level. [file elife-57390-fig1-data5.xls]

	ensembl_gene_id	uniprot_protein_id	chromosome	pvalue_rna	qvalue_rna	correlation_rna	pvalue_protein	correlation_protein	qvalue_protein
ENSG00000000003_O43657	ENSG00000000003	O43657	X	0.17147908969950446	0.3798321794567695	0.13131756552755747	0.2674600537878675	-0.10664882620946596	0.5970599211275949
ENSG00000000419_Q5QPK2	ENSG00000000419	Q5QPK2	20	0.5509296133691848	0.7475889264472247	0.057470920242487615	0.9206123598781448	0.009612020307902584	0.9765353597934678
ENSG00000000457_Q8IZE3	ENSG00000000457	Q8IZE3	1	0.699440889131006	0.8495661353256216	0.037223295171588164	0.6831534500311671	-0.039351337331832034	0.8777892883654838
ENSG00000001036_Q9BTY2	ENSG00000001036	Q9BTY2	6	0.4425502114179606	0.6676011683637458	-0.07396034270483333	0.3637702896903231	0.0874266427074781	0.6829755204443756
ENSG00000001084_P48506	ENSG00000001084	P48506	6	0.9042872133610914	0.9576495313678559	-0.01159723087795907	0.23064118747167045	0.11522756414511105	0.5596643414178168
ENSG00000001497_Q9Y4W2	ENSG00000001497	Q9Y4W2	X	0.3845798896069164	0.6158527807532395	0.0837131459693216	0.4575665781623116	-0.0715554514766307	0.7541391580384349
ENSG00000001629_Q9P2G1	ENSG00000001629	Q9P2G1	7	0.0016809851618810887	0.016013595489498794	-0.2961615855621214	0.125389721009914	0.14700600492666074	0.41655895084593214
ENSG00000001630_A0A0C4DFL7	ENSG00000001630	A0A0C4DFL7	7	0.0829923707667587	0.24097719093302705	-0.16603786486992134	0.2239248166806239	-0.11689343357840283	0.5518531945994213
ENSG00000002549_P28838	ENSG00000002549	P28838	4	0.15334706462838005	0.3550634701830364	-0.1370585072439159	0.6516175834166973	-0.043527195554917936	0.8620946384484434
ENSG00000002822_Q9Y6D9	ENSG00000002822	Q9Y6D9	7	0.016686672007020543	0.0833131809999818	-0.2278081256457862	0.1412127780529165	-0.14119110147117586	0.4454776876442825
ENSG00000002834_Q14847	ENSG00000002834	Q14847	17	0.1886470086810188	0.40387928353979524	0.126281594811194	0.3620776467629256	0.08773436028973185	0.6813952424099005
ENSG00000003056_P20645	ENSG00000003056	P20645	12	0.959754167793071	0.9820776373718471	0.00486693987305695	0.7487740445927356	0.030880722081374663	0.9075963159245154
ENSG00000003147_E9PDL4	ENSG00000003147	E9PDL4	7	0.0895796225652125	0.2527781331628602	-0.162639997140536	0.4975807667841189	0.06535082872936154	0.776619267108962
ENSG00000003393_Q96Q42	ENSG00000003393	Q96Q42	2	0.5086670560439582	0.7184259093858711	-0.06367917588992347	0.7899475940504598	-0.02568745873220777	0.9276634807492659
ENSG00000003509_Q7L592	ENSG00000003509	Q7L592	2	0.0006442546072889662	0.00789429968505919	0.3203863143184194	0.6495157938428362	0.04380830552911846	0.8610824279953918
ENSG00000003756_P52756	ENSG00000003756	P52756	3	0.0120220621239575	0.06582520618433083	-0.23871611558682715	0.38364408008144935	-0.08387748193451915	0.6987841845327736
ENSG00000003989_P52569-3	ENSG00000003989	P52569-3	8	0.7855609456850023	0.8958647328378919	0.026237008062049462	0.22623247300323499	-0.11631714896415125	0.5548412029321299
ENSG00000004059_P84085	ENSG00000004059	P84085	7	0.02117944961482964	0.09843860110781055	0.2195705632103488	0.7261697016489279	0.03376889396433693	0.8997085412785741
ENSG00000004399_Q9Y4D7	ENSG00000004399	Q9Y4D7	3	0.16432809282328684	0.3708651471448244	0.13352514259255222	0.6931948841385572	0.03803719998792161	0.8852883627973679
ENSG00000004455_F8W1A4	ENSG00000004455	F8W1A4	1	0.9883255684994228	0.9941318635191876	-0.0014112513801589669	0.33805945190303155	-0.09220084738260492	0.6578956493284641
ENSG00000004478_Q02790	ENSG00000004478	Q02790	12	0.034487659514368926	0.13511399073811203	-0.2018190151887624	0.2489996359761083	-0.1108406357251443	0.5777224440648134
ENSG00000004487_O60341	ENSG00000004487	O60341	1	1.933849794879608e-07	1.23746853035983e-05	-0.4720093157906467	0.24740655130567504	-0.1112122483841564	0.5761128199433494
ENSG00000004534_P78332	ENSG00000004534	P78332	3	0.5610878469853225	0.7545089175657012	0.05601410688067279	0.6367035606209107	-0.04553000119191943	0.8554368727637487
ENSG00000004700_P46063	ENSG00000004700	P46063	12	0.14728393510269938	0.3456997883940721	0.13909134323372574	0.09579707731695364	0.15961032847139714	0.3578286164970292
ENSG00000004766_Q96JG6	ENSG00000004766	Q96JG6	7	1.4020816193189465e-05	0.0004311741290478411	-0.4011874335291889	0.3345631927803843	0.09286749394352264	0.6550216297707107
ENSG00000004779_O14561	ENSG00000004779	O14561	16	0.11250702005432772	0.2930641332418446	0.1521725735033156	0.9694707319139384	0.0036912569854430795	0.9912896262794396
ENSG00000004864_Q9UJS0	ENSG00000004864	Q9UJS0	7	0.2940879865265488	0.5267309569255546	-0.10093418539090568	0.06565357515639772	-0.17614883409789325	0.2951416157557079
ENSG00000004897_G5EA36	ENSG00000004897	G5EA36	17	0.03270335456010258	0.13038121531670852	-0.20381728399137106	0.31579555170560475	0.09652429793389447	0.6397806148722657
ENSG00000004961_P53701	ENSG00000004961	P53701	X	0.0009990596520833858	0.011007031123388258	0.3095566808458588	0.0014908729126781304	0.29930755048041324	0.02929611005710461
ENSG00000004975_O14641	ENSG00000004975	O14641	17	0.022615906483962573	0.1031474208609812	-0.21725482672841906	0.7667805559867652	0.02859954223498487	0.9160531130339162
ENSG00000005007_Q92900-2	ENSG00000005007	Q92900-2	19	0.3813128320472695	0.6118812505634171	-0.08428792422897698	0.1884545818670736	-0.12633614560864742	0.5097228092078279
ENSG00000005022_P05141	ENSG00000005022	P05141	X	0.007460231510907513	0.04698094026836347	0.25381327359785555	0.014853507220154081	0.23173334799881184	0.127038512684966
ENSG00000005075_P52435	ENSG00000005075	P52435	7	0.5518725349928669	0.7481516176288919	0.057335151521714124	0.7107954277523546	0.03575033869355065	0.8952724164729814
ENSG00000005100_Q9H6R0	ENSG00000005100	Q9H6R0	17	0.06782553461905852	0.2105472231186002	-0.17477174859258415	0.9772322298948848	0.002752529502628105	0.9938289618265898
ENSG00000005156_P49916	ENSG00000005156	P49916	17	0.4725300700242959	0.6926744534688046	-0.06920211006204073	0.16948488370968606	-0.13192623547668592	0.48469650225189687
ENSG00000005175_Q9H6T3	ENSG00000005175	Q9H6T3	12	0.0701711774577723	0.21516670338576355	0.1733241425903385	0.3241535298286134	0.09487901740134412	0.6468933059445786
ENSG00000005194_Q6FI81	ENSG00000005194	Q6FI81	16	0.7114325177638734	0.8572297528122796	-0.035667939373790064	0.08378458435680218	0.16561808653454888	0.3359973634935335
ENSG00000005249_P31323	ENSG00000005249	P31323	7	0.5845871335093997	0.7721119359364327	0.052691169173691835	0.3823508838701935	0.0841049767959286	0.6982154395873602
ENSG00000005302_Q8N5Y2	ENSG00000005302	Q8N5Y2	X	1.3966723387838735e-10	1.8056978094277223e-08	0.5640205167152818	0.05526037972450664	0.18330418544507052	0.270021352032944
ENSG00000005339_Q92793	ENSG00000005339	Q92793	16	0.09208317941565546	0.25732110348397763	-0.16140062098897814	0.4879747469276619	0.06681514944744264	0.7724156730463558
ENSG00000005436_P16383	ENSG00000005436	P16383	2	0.000248840157480714	0.0037490031452736797	-0.3425785328626068	0.3493054791570912	-0.09008559839228793	0.667998810224493
ENSG00000005448_Q9H977	ENSG00000005448	Q9H977	2	0.8452980570906584	0.9300728066110011	-0.018817391602630167	0.0020942083210577253	0.2903079997080494	0.036754790423824076
ENSG00000005700_Q9P2D0	ENSG00000005700	Q9P2D0	6	0.9925297945621164	0.9958537456156206	-0.0009030091678922711	0.03559264234919776	0.200624802713407	0.21131275893323528
ENSG00000005801_A0A087WT67	ENSG00000005801	A0A087WT67	11	0.0653566847578362	0.20588493184529702	-0.1763399355239357	0.19887904766038844	0.1234373059208463	0.5229150769152263
ENSG00000005810_O75592	ENSG00000005810	O75592	13	0.12132285287672452	0.30792442851013335	-0.14859084415041313	0.4903316337377934	-0.06645446906409297	0.7738070036692866
ENSG00000005882_Q15119	ENSG00000005882	Q15119	17	0.08028871059573453	0.23591325678292127	0.16749503782399644	0.07096679808684288	0.17284202386609304	0.3071711544218348
ENSG00000005884_P26006-1	ENSG00000005884	P26006-1	17	0.12046245991353847	0.3066487136617913	0.14893136778528066	0.9678294825136049	-0.0038898018853187905	0.9907682254426351
ENSG00000005893_P13473-2	ENSG00000005893	P13473-2	X	0.1044857642863674	0.27893692235741147	0.15562634076774054	0.8787802248514945	-0.01470904245821549	0.9629501784681413
ENSG00000006007_Q9NZC3	ENSG00000006007	Q9NZC3	16	0.03618746999094267	0.1391065669858142	-0.19999480321300325	0.22973213370760096	-0.11545102664229932	0.558743047765396
ENSG00000006114_Q9UMZ2-5	ENSG00000006114	Q9UMZ2-5	17	0.050205524532565	0.17285434669228222	-0.1871923644111687	0.41657986451807183	0.07823122304524315	0.7251659272018391
ENSG00000006125_P63010	ENSG00000006125	P63010	17	0.00953534156663288	0.055880100670323125	-0.2461569055444548	0.9737224287386336	-0.0031769912297219182	0.9931455056669596
ENSG00000006282_A0A0U1RRL8	ENSG00000006282	A0A0U1RRL8	17	0.07381442085370048	0.2232888300563719	-0.17115148253416992	0.1991854403827615	-0.12335378329422282	0.5231578233259411
ENSG00000006451_P11233	ENSG00000006451	P11233	7	0.17391261727322951	0.383479439758409	-0.1305818430793605	0.9441832998425298	-0.006752541324988321	0.9836458316459987
ENSG00000006453_Q9UHR4	ENSG00000006453	Q9UHR4	7	0.04015608877554856	0.1489395915650469	0.19600073551195948	0.6657624880152894	-0.0416446709825597	0.8699268162090538
ENSG00000006530_Q53H12	ENSG00000006530	Q53H12	7	0.5112197575611488	0.7202332509873842	-0.06329695105605918	0.11608500191655875	-0.15069356443939685	0.3989613440127276
ENSG00000006625_O75223	ENSG00000006625	O75223	7	0.12786269112650858	0.31765103854369875	-0.14606152929238347	0.4352620332583023	-0.0751441007939216	0.7376424828181705
ENSG00000006634_Q9UBU7	ENSG00000006634	Q9UBU7	7	0.023678600346979318	0.10699281968481739	-0.2156214600419513	0.014144115612259266	-0.2333660753734122	0.12378033416958041
ENSG00000006712_Q8N7H5-3	ENSG00000006712	Q8N7H5-3	19	0.9058452409114541	0.9579233790409559	0.011407571592439164	0.09294839782893577	-0.1609785065726875	0.3510774979316996
ENSG00000006715_P49754	ENSG00000006715	P49754	7	0.00016892957937945938	0.002842858908806551	-0.35116049861249266	0.7359599792171349	-0.03251446289357135	0.9012660600223522
ENSG00000006744_Q9BQ52	ENSG00000006744	Q9BQ52	17	0.4141470662252771	0.6443078743951696	-0.0786390753753325	0.5360032642426474	-0.05963545038422444	0.7996831906033891
ENSG00000006757_P41247	ENSG00000006757	P41247	X	5.0097360439166256e-12	8.577480496814006e-10	0.5985007750978562	8.211918984691006e-06	0.4109574068769771	0.0005910736293924785
ENSG00000007062_O43490-2	ENSG00000007062	O43490-2	4	1.4573417126166348e-06	6.788426286342928e-05	-0.4405954670444683	6.091567015383081e-09	-0.5194146954353087	1.114930808586972e-06
ENSG00000007080_Q96CT7	ENSG00000007080	Q96CT7	19	0.2116484971188484	0.43287700811995883	0.12003188642948676	0.19042530379507566	0.1257793725881227	0.5123328417098928
ENSG00000007168_P43034	ENSG00000007168	P43034	17	0.052471932247008836	0.17756927926538513	-0.1854109297518784	0.5032140855192458	0.06449900764040466	0.7788305638316649
ENSG00000007202_Q14667	ENSG00000007202	Q14667	17	0.010487693823040364	0.059963484087509664	-0.24312592923655355	0.08261798935065448	-0.16623735687927568	0.33412300491180086
ENSG00000007255_O75865	ENSG00000007255	O75865	19	0.33502175991409644	0.567994652907149	0.09277980584940727	0.6586154356855166	0.042593858410045406	0.8674116942848312
ENSG00000007392_Q9NQ29	ENSG00000007392	Q9NQ29	16	0.4503803519963826	0.6732325459879858	-0.07270074342813097	0.3344899102485573	0.09288151424743	0.6550216297707107
ENSG00000007402_Q9NY47-4	ENSG00000007402	Q9NY47-4	3	0.008452071784199409	0.051157682968570296	0.24994684021560626	0.10751607280899876	0.15429800599414364	0.3826377568969145
ENSG00000007520_Q9UJK0	ENSG00000007520	Q9UJK0	16	0.30545370396833715	0.5376889496150122	0.09859964253086108	0.7415401460135663	0.03180190958741656	0.9038178624033166
ENSG00000007866_Q99594	ENSG00000007866	Q99594	6	0.0004313372107709274	0.005801531274381795	0.32994997699408835	0.4220195965727263	0.07732424561380953	0.7296066255100288
ENSG00000007923_Q9NVH1-3	ENSG00000007923	Q9NVH1-3	1	0.8522388161332891	0.9339782832708945	0.017963215095672905	0.07400751683578204	-0.17103876471396298	0.3129321140924222
ENSG00000008018_P20618	ENSG00000008018	P20618	6	0.8756892875393555	0.9445685471227664	-0.015087095907224016	0.9862705279707906	-0.0016596951642939856	0.996589006143331
ENSG00000008056_P17600	ENSG00000008056	P17600	X	0.3308241598341904	0.5645934947601282	0.093585349360304	0.3131213044883291	0.09705666288065737	0.6379223149050204
ENSG00000008083_Q92833	ENSG00000008083	Q92833	6	0.2723633882484552	0.5062589538454204	0.10556870796895153	0.5506341657462274	-0.0575134841216027	0.8098010188769704
ENSG00000008130_O95544	ENSG00000008130	O95544	1	0.3456342418463976	0.5769738200369652	0.09077134207200463	0.21275288452834945	0.11974433795179865	0.5401882593296102
ENSG00000008282_Q16563-2	ENSG00000008282	Q16563-2	7	0.7992472224494664	0.9025367476323297	0.02452511510580411	0.6734023049737183	-0.04063442445861962	0.8737737268874448
ENSG00000008294_O60271	ENSG00000008294	O60271	17	0.6805756869680801	0.8371901738352414	0.03968985030909773	0.0013771380088733634	0.3013686775692676	0.027741968820260268
ENSG00000008311_Q9UDR5	ENSG00000008311	Q9UDR5	7	0.04544298363850102	0.16145894635440491	0.19116398019792125	0.43177373970613503	0.07571466089331037	0.7349140368766695
ENSG00000008382_M0R0F2	ENSG00000008382	M0R0F2	19	0.058093591825520284	0.19078429456437068	-0.18125128341034166	0.2833013786314363	-0.1032056121129149	0.6126098076651313
ENSG00000008394_P10620	ENSG00000008394	P10620	12	0.09028464280116777	0.25345025649913605	-0.16228822892818207	0.012980240773255592	-0.2362061106164158	0.11861829157414454
ENSG00000008838_A0A0B4J1W0	ENSG00000008838	A0A0B4J1W0	17	0.005369872131256086	0.037710946576557214	-0.2637367697344979	0.4912379204343845	0.06631602262883457	0.773977897358563
ENSG00000008869_Q9P2D3	ENSG00000008869	Q9P2D3	2	0.21037750392774	0.43102894158545696	-0.12036414059867112	0.8405221020194779	0.019405995460135172	0.9474576615036043
ENSG00000008952_Q99442	ENSG00000008952	Q99442	3	0.6323289690741588	0.807285318049128	0.04612112545181372	7.440043325376783e-05	-0.3685619677751996	0.0032644464070112106
ENSG00000008988_P60866	ENSG00000008988	P60866	8	0.675008337911096	0.8345412477087755	0.04042261430091816	0.2394521475414472	-0.1130929293899936	0.5677018716323133
ENSG00000009307_O75534	ENSG00000009307	O75534	1	0.00306196911070729	0.024805082245947165	-0.2798938706488407	0.20851912301755848	0.120852533797528	0.53473719057265
ENSG00000009335_Q15386	ENSG00000009335	Q15386	7	0.005874886000920835	0.04013019412866012	-0.26106013279532136	0.5069809108589597	-0.06393219198637183	0.7815550767582625
ENSG00000009780_Q8TAV0	ENSG00000009780	Q8TAV0	1	0.04319825796206148	0.15566607746852076	0.193157052581816	0.40585318973584256	0.08004014849810137	0.716924657942877
ENSG00000009844_A0A087WY55	ENSG00000009844	A0A087WY55	6	0.9716015716959098	0.987184596101618	-0.0034335083411291593	0.5488802188241657	0.057766396475247374	0.8083770539370949
ENSG00000009954_Q9UIG0-2	ENSG00000009954	Q9UIG0-2	7	0.3760431900407585	0.6067839044595529	0.08522133988962176	0.4802570778118475	0.06800275038064191	0.7677880809739693
ENSG00000010017_Q96S59	ENSG00000010017	Q96S59	6	0.6511791215576059	0.8176847839578659	-0.043585808689556436	0.4349997955160457	0.07518690272936591	0.7375952504898676
ENSG00000010165_Q8N6R0	ENSG00000010165	Q8N6R0	1	0.2020368241781325	0.4206057447152381	0.1225808979588703	0.03506492554087173	0.2011911808000085	0.20983407426123388
ENSG00000010244_O43670	ENSG00000010244	O43670	17	0.5647593279203204	0.7562884285967292	0.05549068397049591	0.09901314561028388	0.15810376242314306	0.3645277073445279
ENSG00000010256_P31930	ENSG00000010256	P31930	3	0.6753392235643925	0.8347558920434627	-0.04037899969910542	0.1951875168981532	-0.1244509903007216	0.5183439088706193
ENSG00000010278_A6NNI4	ENSG00000010278	A6NNI4	12	0.4265788814409409	0.6543405678299511	0.07656926070404628	0.2781818709710474	-0.10430388498139392	0.6064150164628604
ENSG00000010292_Q15021	ENSG00000010292	Q15021	12	0.0009789234618167917	0.01084174848008632	-0.3100683457419405	0.6052348546921349	-0.04982178285883182	0.8397518906557973
ENSG00000010322_Q9Y2I1	ENSG00000010322	Q9Y2I1	3	0.6387591076700545	0.8108872942208962	-0.045252825687104585	0.21663641081967047	-0.11874154261650015	0.5457887403229981
ENSG00000011007_A0A024RAC6	ENSG00000011007	A0A024RAC6	1	0.02867832412857457	0.12097710181153694	-0.20868761375362724	0.5142362950760839	0.06284653900129464	0.7875203696527356
ENSG00000011009_O95372	ENSG00000011009	O95372	1	0.2987172258159167	0.5306712354301268	-0.0999762872236777	0.413518900552546	-0.07874461245895532	0.722252316057423
ENSG00000011021_P51797	ENSG00000011021	P51797	1	0.9784696541936574	0.989876279034944	0.002602893161474667	0.003784405966011705	-0.27391248668859275	0.05460113652763735
ENSG00000011028_Q9UBG0	ENSG00000011028	Q9UBG0	17	0.9766890992917232	0.9887065266879301	0.002818209967504478	0.7185861933869985	-0.034744450857034835	0.896919044232174
ENSG00000011132_O96018	ENSG00000011132	O96018	19	0.9920616979978616	0.995848757922846	0.0009595951399866237	0.244123929450821	0.11198321645968133	0.5728417187040143
ENSG00000011198_Q8WTS1	ENSG00000011198	Q8WTS1	3	0.1604514922545162	0.3653703103638965	-0.13475182442773406	0.21359388132951404	0.11952608034068753	0.5416650549424343
ENSG00000011201_P23352	ENSG00000011201	P23352	X	0.6492707780871402	0.8165833589799549	0.043841099771419034	0.13707603946307276	0.14266132962695718	0.44006186164256494
ENSG00000011243_Q9ULX6	ENSG00000011243	Q9ULX6	19	0.7086394283321092	0.8560533385193531	0.03602938084066087	0.1232822620881048	0.14782224805902114	0.41198820925324436
ENSG00000011258_Q05BQ5	ENSG00000011258	Q05BQ5	17	0.008150345846223336	0.04997212335809351	-0.2510786528653421	0.05796046767701101	-0.18134588386682274	0.27631492819156717
ENSG00000011260_Q9Y5J1	ENSG00000011260	Q9Y5J1	17	0.6835764829312323	0.8389477582000772	-0.03929583027499956	0.12989552824843326	-0.14529558421142028	0.4256822194083496
ENSG00000011295_Q6DKK2	ENSG00000011295	Q6DKK2	17	0.013355282977747384	0.07103754631740528	-0.23526753046024956	0.4579137198219063	-0.07150038008533209	0.7541391580384349
ENSG00000011304_P26599	ENSG00000011304	P26599	19	0.6657194671855478	0.8283881182678515	-0.041650372509950864	0.8944123361866271	-0.012800362978069591	0.967884882908856
ENSG00000011376_Q15031	ENSG00000011376	Q15031	3	0.6110643496384466	0.7910842534002253	-0.049019602005109984	0.0925855221263374	-0.16115516250131512	0.3507447816642144
ENSG00000011405_O00443	ENSG00000011405	O00443	11	0.5397685973608196	0.7404577878477245	-0.059086657704554714	0.5397946728541791	-0.05908286384584657	0.80193058309459
ENSG00000011426_Q9NQW6	ENSG00000011426	Q9NQW6	7	0.07319036493898551	0.22184735018587234	-0.17151740206279592	0.381106812799304	0.08432426912008235	0.6967380829886819
ENSG00000011451_M0QXA7	ENSG00000011451	M0QXA7	19	0.6417819986956781	0.8117428917616021	-0.04484587993945386	0.21167907476487632	-0.12002391057964465	0.5390782094448463
ENSG00000011454_Q9Y3P9	ENSG00000011454	Q9Y3P9	9	0.1548775442772206	0.3573844622851863	-0.13655493446790634	0.8995375651605668	0.012175683470447769	0.9689654687100372
ENSG00000011478_Q9NXS2	ENSG00000011478	Q9NXS2	19	0.9035329278193724	0.9573004583147738	0.011689066189187693	0.8105209341858854	-0.023120715282412156	0.9368945125796454
ENSG00000011485_P53041	ENSG00000011485	P53041	19	0.15119336643905082	0.35198459061797377	0.13777356094213594	0.0979103819907229	0.1586159488762958	0.3621327407809301
ENSG00000011566_Q8IVH8	ENSG00000011566	Q8IVH8	2	0.002311696551827286	0.020204792401176352	-0.2876364345254351	0.01791373162109055	-0.2253846073241773	0.14392885232134459
ENSG00000012048_P38398-4	ENSG00000012048	P38398-4	17	0.9955864758507488	0.9982315826181761	0.0005335081384316983	0.970787047483866	-0.0035320311018425866	0.9918439914165305
ENSG00000012061_P07992	ENSG00000012061	P07992	19	0.7740749013732771	0.8903122646301382	-0.02767999339008589	0.31895984318004605	-0.09589813571293317	0.6420653044201466
ENSG00000012232_O43909	ENSG00000012232	O43909	8	0.6813252688839686	0.8371901738352414	-0.03959136526617516	0.3318651550197601	-0.0933849722648002	0.6533276530597981
ENSG00000012822_Q9P1Z2-2	ENSG00000012822	Q9P1Z2-2	12	0.9232823037111498	0.9669355916697197	-0.009287746961092842	0.1844621432347226	-0.12747721758680558	0.506066162553162
ENSG00000012963_Q8N806	ENSG00000012963	Q8N806	14	0.9983149419202142	0.9987879275212503	-0.00020368945706209123	0.5428658487584017	-0.05863665252355256	0.8046242938964996
ENSG00000012983_A0A0A0MQR1	ENSG00000012983	A0A0A0MQR1	14	0.21790060074024087	0.4398259347700485	-0.11841786210698675	0.10016604662689782	0.157573067148517	0.3670844935308395
ENSG00000013016_Q9NZN3	ENSG00000013016	Q9NZN3	2	0.7782684725476676	0.8930140868664145	-0.027152465348473768	0.010894193663667236	-0.24190527331824044	0.10612183618940732
ENSG00000013275_P43686	ENSG00000013275	P43686	19	0.9238901156843604	0.9672523356239338	-0.009213940818708593	0.07615698978027367	0.16979976108316908	0.31782519643806717
ENSG00000013374_H3BM14	ENSG00000013374	H3BM14	7	0.3161751036832328	0.549813143517233	0.09644897717670532	0.29296155689809444	0.10116877444078487	0.6224582863977424
ENSG00000013375_O95394	ENSG00000013375	O95394	6	0.6079035549984488	0.7888301968281797	0.049454130768454015	0.025096055704365027	0.2135377595369729	0.17291008685174264
ENSG00000013441_P49759-3	ENSG00000013441	P49759-3	2	0.6643872504771259	0.8275749253301096	-0.041827001766534866	0.3114323936536577	0.09739439775641733	0.6379223149050204
ENSG00000013503_Q9NW08	ENSG00000013503	Q9NW08	12	0.17516984082616002	0.38558059125563715	0.13020471786078364	5.2535903050333084e-05	0.3756555990390105	0.0025304134957927346
ENSG00000013561_Q9UBS8	ENSG00000013561	Q9UBS8	5	0.24349638972949986	0.47000293386239533	0.11213141810034986	0.6490940653121301	0.04386475507934009	0.8610824279953918
ENSG00000013573_Q96FC9-3	ENSG00000013573	Q96FC9-3	12	0.2166573651983965	0.4387560305786945	-0.11873616659621525	0.15287843007738255	-0.13721345499532073	0.46136263660684523
ENSG00000013583_Q9NRV9	ENSG00000013583	Q9NRV9	12	0.4071736277748564	0.6373923513386516	-0.07981597152560829	0.05387104716666337	-0.18434264094103006	0.2658923674311379
ENSG00000013810_Q9Y6A5	ENSG00000013810	Q9Y6A5	4	0.003305413134715696	0.026405790931177727	-0.27774860352694064	0.85381408911301	-0.01776954711754686	0.9523825622249594
ENSG00000014123_O94874	ENSG00000014123	O94874	6	0.8727420123651022	0.9428411746816033	-0.015447790970164726	0.7292416941940227	0.03337468114139528	0.9002740977080189
ENSG00000014138_Q14181	ENSG00000014138	Q14181	11	0.4191927698845846	0.6484947978556393	0.07779471636837113	5.9465765315224085e-08	0.4889971832182111	8.657674832030126e-06
ENSG00000014164_Q8IXZ2	ENSG00000014164	Q8IXZ2	8	0.7614789198420382	0.8843206154352543	0.029269492587411124	0.7600218565888138	-0.029453859951085338	0.9121519752836518
ENSG00000014216_P07384	ENSG00000014216	P07384	11	0.005170720049974154	0.036640393195286655	0.2648543146203103	0.007522442865693998	0.2535577876560836	0.08337157266026946
ENSG00000014641_P40925	ENSG00000014641	P40925	2	0.6596809059142613	0.8245058239201507	-0.04245209867067366	0.9037427518868856	0.011663518772081164	0.9708977530201295
ENSG00000014824_Q6PML9	ENSG00000014824	Q6PML9	4	0.2167528510199008	0.4387560305786945	-0.11871167358386968	0.4236339654069436	-0.07705638230704298	0.7309432738609057
ENSG00000014919_Q7KZN9-2	ENSG00000014919	Q7KZN9-2	10	0.06294851514875183	0.20130178872657387	-0.17791669240320748	0.008662549422304528	-0.24917822411927906	0.09142057924099309
ENSG00000015133_Q9P219	ENSG00000015133	Q9P219	14	0.00014347161291087456	0.0025075282479806904	-0.3547075026650163	0.11306661598788185	-0.1519388699088319	0.3930031155824043
ENSG00000015171_Q15326-3	ENSG00000015171	Q15326-3	10	0.00570774917367022	0.039339941756355	-0.2619225199697228	0.5228847441530929	-0.06156264010772525	0.7910903641811141
ENSG00000015475_P55957	ENSG00000015475	P55957	22	0.02526138954930254	0.11167543809827746	-0.21330130627964325	0.9648152528315408	0.004254481631158297	0.9902597663085226
ENSG00000015479_A8MXP9	ENSG00000015479	A8MXP9	5	0.02529608572978824	0.11175083898061959	-0.21325185305036912	0.5978271917482888	-0.050846078360524016	0.8354452422206671
ENSG00000015676_Q8IVD9	ENSG00000015676	Q8IVD9	7	0.5005434340117856	0.7128523684845275	0.06490221513646255	0.6893482475018764	-0.038539778246472735	0.8817821233021207
ENSG00000016391_Q8NE62	ENSG00000016391	Q8NE62	3	0.5894815822443122	0.775086306251083	0.052006907324272766	0.067921299297772	-0.17471185940891445	0.29960441153580547
ENSG00000016864_Q68CQ7	ENSG00000016864	Q68CQ7	3	0.011549961120302862	0.06440933424042133	-0.2400177508512911	0.482343658126928	0.06768066457581241	0.7684922401150877
ENSG00000017260_P98194-5	ENSG00000017260	P98194-5	3	0.02494043059049801	0.11084570547488555	-0.21376154580753767	0.4658078142531427	-0.07025420360840115	0.7590854383377339
ENSG00000017797_Q15311	ENSG00000017797	Q15311	18	0.03538877973379572	0.13737004878284062	-0.2008427576508849	0.3130143413536629	0.09707801736637588	0.6379223149050204
ENSG00000018189_Q7L099-4	ENSG00000018189	Q7L099-4	4	0.004047991388466515	0.030711514495005695	-0.2719837011118462	0.43895848715131375	-0.07454232504268653	0.7411206918881446
ENSG00000018510_O00116	ENSG00000018510	O00116	2	0.0007266728874760285	0.008564416173435858	-0.317454688281335	0.0006895164485953856	-0.3187364824713863	0.01652834472780971
ENSG00000018610_Q9H5V9-3	ENSG00000018610	Q9H5V9-3	X	0.0004976697229500461	0.006487114598536095	0.3265757281797436	0.029998959323860982	0.20702910921708104	0.1919641052235564
ENSG00000018625_B1AKY9	ENSG00000018625	B1AKY9	1	0.0767830686122675	0.22933556796733362	0.16944417124138636	0.919047535933868	-0.009802122838019707	0.9760309209536404
ENSG00000018699_Q6P3X3	ENSG00000018699	Q6P3X3	2	0.09437472475060174	0.2610759306965336	-0.16028938271995768	0.3740108329303951	0.08558345711191262	0.6917899074318962
ENSG00000019144_Q86UU1-2	ENSG00000019144	Q86UU1-2	11	0.14169338283348692	0.3377078932468547	-0.1410224182621066	0.8945293234539027	-0.012786098381948772	0.967884882908856
ENSG00000019582_P04233-2	ENSG00000019582	P04233-2	5	0.009263161096574754	0.05472317120260594	0.24707203020003984	0.11500726721572085	0.151135293950962	0.3969485742370193
ENSG00000020129_Q9UBB6	ENSG00000020129	Q9UBB6	1	0.9847794717886704	0.9918465092874426	-0.0018399628592353189	0.10999011932069074	-0.15323502231672004	0.3870103065596681
ENSG00000020426_P51948	ENSG00000020426	P51948	14	0.4982503908575899	0.7115145811729982	-0.06524931059152914	0.08187913585734287	0.16663319035122345	0.33239400779603195
ENSG00000020922_F8W7U8	ENSG00000020922	F8W7U8	11	0.05923662037493985	0.19343504643053813	-0.18044625055657926	0.3222389499498897	0.09525346952294857	0.6444778998997794
ENSG00000021355_P30740	ENSG00000021355	P30740	6	0.6554721907237169	0.8212848750464293	0.04301259553734	0.1012314689489918	0.15708689193241548	0.3694931555595353
ENSG00000021574_Q9UBP0-3	ENSG00000021574	Q9UBP0-3	2	0.03794433763042602	0.14350888291865602	-0.1981835400094963	0.325716170984859	0.09457444860745433	0.6490008682205308
ENSG00000021762_Q9H0X9	ENSG00000021762	Q9H0X9	11	0.02616244644848137	0.11406682605032999	0.21203538705451166	0.6497036563995026	0.04378316437087255	0.8610824279953918
ENSG00000021776_O60306	ENSG00000021776	O60306	15	0.08480660894383933	0.24420448529964642	-0.16508119131541854	0.3055089022661222	0.09858844498432252	0.6333624685814818
ENSG00000021826_P31327-3	ENSG00000021826	P31327-3	2	0.0013685916227265738	0.013827795741583486	0.3015297417991857	0.061002508327632536	0.17922717406423064	0.28389391682003773
ENSG00000022267_Q13642-4	ENSG00000022267	Q13642-4	X	2.2165364687040117e-14	5.200651307125894e-12	0.6470682867923923	3.8592686785535135e-10	0.5526405006348495	1.1237488706733549e-07
ENSG00000022277_A0A0A0MQR2	ENSG00000022277	A0A0A0MQR2	20	0.5368382190132729	0.7386772626952832	0.05951359240489465	0.014042799867598842	-0.2336050468010633	0.12323037801621668
ENSG00000022556_Q9NX02-5	ENSG00000022556	Q9NX02-5	19	0.22734319223392446	0.45011230631757426	0.11604124624611185	0.18030296543272187	0.12868528081957442	0.4989290697892079
ENSG00000022840_Q8N5U6	ENSG00000022840	Q8N5U6	12	0.5734111824285464	0.7626621542483396	-0.054263565100393485	0.16617296919141794	0.1329489052677131	0.4818016491365111
ENSG00000023191_P13489	ENSG00000023191	P13489	11	0.3457741676960088	0.5769738200369652	0.0907451220033117	0.9881282078815118	-0.0014351108327788685	0.996589006143331
ENSG00000023228_P28331-2	ENSG00000023228	P28331-2	2	0.005878582502193622	0.04013019412866012	-0.2610413074295672	0.26387682815443503	-0.10744666287139527	0.5941634309867525
ENSG00000023287_Q8TDY2-2	ENSG00000023287	Q8TDY2-2	8	0.2814793774725161	0.5139792276848972	-0.10359494623093883	0.6403529282899469	0.04503816461783142	0.8569874190404343
ENSG00000023318_Q9BS26	ENSG00000023318	Q9BS26	9	0.1791547997624195	0.3904422662662071	0.12902236187793292	0.9340435161250242	0.007981774425375902	0.9800954568872899
ENSG00000023697_Q9Y315	ENSG00000023697	Q9Y315	12	0.3621354512079323	0.5943337003632775	-0.0877238369782921	0.3948072269162196	-0.08193259701512923	0.7083236034049755
ENSG00000023734_Q9Y3F4-2	ENSG00000023734	Q9Y3F4-2	12	0.3713521397834143	0.6024368259994698	-0.08605898967120319	0.08351201942517053	0.16576215424253268	0.3359973634935335
ENSG00000023892_Q9H4E7	ENSG00000023892	Q9H4E7	6	0.015551795006976375	0.07875953437709635	-0.2301910546387081	0.9727529869663424	-0.0032942421042708387	0.9927409344196781
ENSG00000023909_P48507	ENSG00000023909	P48507	1	0.8029607065724895	0.9051296883125516	-0.0240619628686765	0.8807708289011484	0.014465689394266932	0.9629501784681413
ENSG00000024048_Q8IWV8-4	ENSG00000024048	Q8IWV8-4	6	0.3038928697443392	0.5365555545792611	0.09891682351444707	0.25359812599993803	0.10977706792387744	0.5830858427902454
ENSG00000024422_Q9NZN4	ENSG00000024422	Q9NZN4	19	3.979660762588904e-05	0.0009339033255638449	0.3812016105753835	5.712021203566729e-07	0.4555545101518894	6.201899632211604e-05
ENSG00000024862_Q8IWP9	ENSG00000024862	Q8IWP9	6	0.97318518636603	0.9874934383844183	-0.003241968389549993	0.0006787866594136672	0.3191184127657189	0.016448651063359368
ENSG00000025293_Q9BVI0	ENSG00000025293	Q9BVI0	20	0.9323558050298371	0.9698643718988536	-0.008186492348430992	0.2418300584750581	-0.11252623271047024	0.5699655533166422
ENSG00000025770_Q6IBW4	ENSG00000025770	Q6IBW4	22	0.7716100583078724	0.8889164071173042	0.027990437724246076	0.5114015872626628	0.06326976264737733	0.7844919942539794
ENSG00000025772_Q15785	ENSG00000025772	Q15785	20	0.4874049907142749	0.7047475702219278	-0.0669024795805521	0.8603692164795229	-0.016964392806433873	0.9540490596569868
ENSG00000025796_Q9UGP8	ENSG00000025796	Q9UGP8	6	0.14158996420743286	0.3375993640403301	-0.14105867960320595	0.02977621009711065	-0.2073044470670147	0.19112865920049182
ENSG00000025800_O60684	ENSG00000025800	O60684	1	0.5448703635408337	0.7435195298590757	0.0583460853773697	0.0005854206918300925	0.3226975580405645	0.014915657527302355
ENSG00000026025_P08670	ENSG00000026025	P08670	10	0.468767120476681	0.68908392928502	0.06979003195685557	0.4805991148665846	-0.06794990192126034	0.7681431960667018
ENSG00000026297_A0A087WZM2	ENSG00000026297	A0A087WZM2	6	0.035342199516699535	0.13737004878284062	0.20089270600618625	0.12915041208263658	0.14557526062377935	0.42427566143659995
ENSG00000026652_Q9NRZ5	ENSG00000026652	Q9NRZ5	6	0.13284861513086554	0.3241895134260529	0.14419907931139692	0.018583472125491687	0.2241217590222668	0.14758071902099942
ENSG00000027001_Q99797	ENSG00000027001	Q99797	13	0.012761005284258416	0.06891813169290457	-0.23676577962599396	0.29868305128901823	-0.09998332275105784	0.626921240680685
ENSG00000028116_Q86Y07	ENSG00000028116	Q86Y07	2	6.108429590081849e-07	3.424504553377745e-05	-0.4545062340064375	0.05364047444460247	-0.18451710904455232	0.26534430833368605
ENSG00000028203_F8W8C2	ENSG00000028203	F8W8C2	12	0.4066225267160592	0.6369816287700878	0.07990948245060035	0.26570850944436897	0.10703791016705846	0.5952178546696199
ENSG00000028310_Q9H8M2	ENSG00000028310	Q9H8M2	5	0.5158581658149262	0.7230948574952375	-0.06260493090714599	0.8587804944354291	-0.017159423493889128	0.9540490596569868
ENSG00000028528_Q13596	ENSG00000028528	Q13596	15	0.1535917606937142	0.3555001110685712	0.13697774283188202	0.14435638914667193	0.1400955225975385	0.45043693564227005
ENSG00000028839_P62380	ENSG00000028839	P62380	6	0.6684203803675453	0.8295282714091768	0.041292699655814134	0.21144381433178905	0.12008529689169463	0.5390782094448463
ENSG00000029363_Q9NYF8-2	ENSG00000029363	Q9NYF8-2	6	0.4048424071581061	0.63513537626216	-0.0802120441882757	0.1959786267389283	-0.12423259548372766	0.5195596120128104
ENSG00000029534_P16157-3	ENSG00000029534	P16157-3	8	0.2372460152867837	0.4618380256798752	-0.11362219820332448	0.4778721573341725	-0.06837181078396462	0.7660783383089862
ENSG00000029639_Q8WVM0	ENSG00000029639	Q8WVM0	6	0.8614754536392387	0.9377350855661556	0.016828632153219246	0.06266667257702271	-0.17810442618076558	0.2876704267167321
ENSG00000029725_Q15276	ENSG00000029725	Q15276	17	0.4107024559566623	0.6414694424273806	-0.07921895392702484	0.3667674862738423	0.08688391889476632	0.6865904491730666
ENSG00000029993_O15347	ENSG00000029993	O15347	X	0.00021807539718748177	0.0034027281802529482	0.3455302412385132	3.019199922182783e-05	0.38662003677667584	0.001653076470213924
ENSG00000030066_Q12769	ENSG00000030066	Q12769	11	3.125927340686861e-05	0.0007858234009226693	-0.3859437578748928	0.18808421828544408	-0.12644125357633176	0.5096732243386441
ENSG00000030110_Q16611	ENSG00000030110	Q16611	6	0.10708644394119743	0.2836089558392499	0.15448453855933353	0.31452970628604754	0.09677592518158296	0.6384275343689546
ENSG00000030582_P28799	ENSG00000030582	P28799	17	0.1073851178752093	0.2840437251521715	0.1543548011066345	0.8518791103606109	-0.018007448211082154	0.9516814242569517
ENSG00000031691_Q7L2Z9	ENSG00000031691	Q7L2Z9	6	0.13603776734806236	0.32968601995025826	-0.14303562349267512	0.203096712155526	-0.12229560855356275	0.5286621446843964
ENSG00000031698_P49591	ENSG00000031698	P49591	1	0.013309409033665318	0.0708530304439242	0.2353810919082488	0.004026522033738928	0.2721365298324265	0.05685857889836007
ENSG00000031823_Q9H6Z4-3	ENSG00000031823	Q9H6Z4-3	19	0.11730543757423124	0.3014423549332284	0.1501971664519049	0.03707217637166673	0.1990736956973725	0.2168806957414585
ENSG00000032219_P29374	ENSG00000032219	P29374	14	0.13259294009841668	0.323939944282094	-0.1442932727804217	0.9532626361595472	-0.005652787840933671	0.9868427854555318
ENSG00000032389_A8MUM1	ENSG00000032389	A8MUM1	2	0.5135012963461947	0.7217729559248155	-0.06295615945643339	0.9591862436602616	0.004935677834000085	0.9891415126992331
ENSG00000032444_Q8IY17-4	ENSG00000032444	Q8IY17-4	19	0.7547978355972387	0.8803234803959631	0.03011575299306193	0.7171472599098753	0.03492995173517823	0.8966287973569993
ENSG00000033011_Q9BT22	ENSG00000033011	Q9BT22	16	0.23555190004732174	0.459852476671736	0.11403096201483888	0.25452472894007666	-0.10956436498288848	0.5833579297281328
ENSG00000033030_Q6NZY4	ENSG00000033030	Q6NZY4	12	0.2755400343806153	0.5092024847728116	0.10487593930055658	0.8088520252024538	-0.02332830442038063	0.9363290362347263
ENSG00000033050_Q9UG63-2	ENSG00000033050	Q9UG63-2	7	0.06667243118582697	0.208100435374102	-0.17549831563675475	0.21929168383258107	-0.11806322659050165	0.5483924801448716
ENSG00000033178_A0AVT1	ENSG00000033178	A0AVT1	4	0.12446500922826766	0.3123953381383025	-0.14736284700984362	0.17812857146991465	0.12932498745131255	0.4950505981936109
ENSG00000033627_Q93050-1	ENSG00000033627	Q93050-1	17	0.26972509733353506	0.5037466071957384	-0.10614822697734952	0.9250289450357096	-0.00907566793185436	0.9779450208209611
ENSG00000033800_O75925	ENSG00000033800	O75925	15	0.5068050784236963	0.7164941244842927	0.06395860175629679	0.8966833860068654	0.012523496264775434	0.9684768523497281
ENSG00000033867_Q9Y6M7-13	ENSG00000033867	Q9Y6M7-13	3	0.04645105770717135	0.1640647235975933	-0.19029545627218405	0.01225380429101396	-0.23809345357421804	0.1140957416980166
ENSG00000034152_P46734	ENSG00000034152	P46734	17	0.016591511021761766	0.08295755510880883	0.2280024526760869	0.11947017808966873	0.14932642900506593	0.4038659423970543
ENSG00000034693_P56589	ENSG00000034693	P56589	6	0.3286967011617087	0.562012358778856	0.0939961105074615	0.912806112100674	-0.010560742841202609	0.974735114871965
ENSG00000034713_P60520	ENSG00000034713	P60520	16	0.6572862877474148	0.8226621757262689	-0.04277082775519502	0.8533755800626405	-0.017823451380154398	0.9523825622249594
ENSG00000035141_E7EQY1	ENSG00000035141	E7EQY1	2	0.980475451884772	0.9902232187451045	-0.002360353732436437	0.1034362265677492	-0.1560934355601572	0.37501592438811254
ENSG00000035403_P18206	ENSG00000035403	P18206	10	0.0322084112437576	0.1292983878684586	0.20438786264372327	0.00018843307985539324	0.3487643760062242	0.006455092564458017
ENSG00000035499_Q8WUY9	ENSG00000035499	Q8WUY9	5	0.027875409242009475	0.11899644039631403	-0.2097279136194128	0.8577726532008907	-0.01728318139306783	0.9540490596569868
ENSG00000035681_Q92636	ENSG00000035681	Q92636	8	0.00034087461658747283	0.004746023507871737	-0.33541954562123144	0.8968087685512796	0.012508213696314958	0.9684768523497281
ENSG00000035687_P30520	ENSG00000035687	P30520	1	0.6573236229257179	0.8226621757262689	0.0427658548250397	0.6923007831677388	0.03815392636800074	0.8846379464398225
ENSG00000035928_P35251-2	ENSG00000035928	P35251-2	4	0.05240724726235202	0.17744516911117053	-0.18546088484967788	0.006985104210217876	-0.25582916812886897	0.08023417712326474
ENSG00000036054_Q9NUY8-2	ENSG00000036054	Q9NUY8-2	3	0.774380457754432	0.8903122646301382	-0.027641528664551843	0.3307026304989405	0.09360876826499287	0.6528446998385864
ENSG00000036257_Q13618	ENSG00000036257	Q13618	2	0.4501338611591291	0.6730228960214971	-0.07274020736409158	0.43696647083884	0.07486626252017689	0.7393574253020626
ENSG00000036549_Q8IYH5-2	ENSG00000036549	Q8IYH5-2	1	0.0028533705275153626	0.023445009457600287	-0.2818577852832941	0.022772109169583502	-0.21701067519516076	0.16384354028252743
ENSG00000037474_Q08J23	ENSG00000037474	Q08J23	5	0.7113921782856272	0.8572297528122796	-0.03567315599868614	0.6300546578855959	0.04642912199633066	0.853917674413062
ENSG00000037757_Q9BV20	ENSG00000037757	Q9BV20	19	0.7481119578851365	0.8767687866348794	-0.030964917543198276	0.8563672758470537	-0.01745580166901626	0.9540490596569868
ENSG00000037897_Q9UBP6	ENSG00000037897	Q9UBP6	12	0.15562291598535855	0.35836829253625824	0.1363110339600275	0.4467522896080178	0.07328283254103983	0.7480123280786625
ENSG00000038210_Q8TCG2	ENSG00000038210	Q8TCG2	4	0.9672209033982022	0.9847869532349102	-0.003963426885323277	0.2315234307611782	0.11501128162932373	0.5600978464713398
ENSG00000038219_Q8NFC6	ENSG00000038219	Q8NFC6	4	0.7817191844460029	0.8947353922757605	0.026718985917336967	0.2051407492830145	0.12174842055374202	0.5301055425199641
ENSG00000038274_Q9NZL9	ENSG00000038274	Q9NZL9	5	0.10194581394857906	0.2745861953079287	-0.15676316700202836	0.12522426948215368	-0.1470697029837583	0.4165039825039857
ENSG00000038358_Q6P2E9	ENSG00000038358	Q6P2E9	16	0.9481622614223733	0.9771292919589334	-0.00627048308629674	0.9577247293932184	-0.0051125817683839465	0.9885985843350731
ENSG00000038382_O75962	ENSG00000038382	O75962	5	0.4346607410124335	0.6605112450284798	0.07524226432334892	0.8367867213165219	-0.019866851910788026	0.9462009027822853
ENSG00000038427_P13611	ENSG00000038427	P13611	5	0.064393857176999	0.20457094623326133	0.17696458187663286	0.08273368679115774	0.16617562961785234	0.3343798092013605
ENSG00000038532_Q2KHT3	ENSG00000038532	Q2KHT3	16	0.002917770097951593	0.023890810558039047	0.281238060013302	0.34599888390611183	0.09070302740157217	0.6644091277885349
ENSG00000039068_A0A087WXI5	ENSG00000039068	A0A087WXI5	16	0.13656666279066162	0.3304670631568176	0.14284468775126552	0.14031491590881792	0.14150740345303486	0.44405875389829486
ENSG00000039123_P42285	ENSG00000039123	P42285	5	0.0001065095343458749	0.002008148512146183	-0.3610710967314129	0.0321443346068571	-0.20446227183301136	0.1999251870778361
ENSG00000039319_Q7Z3T8	ENSG00000039319	Q7Z3T8	5	1.1404332580053884e-05	0.0003648810449224311	-0.4049960845080297	0.012139312098681436	-0.2383997814495024	0.11398480994336185
ENSG00000039523_A0A0A0MTL6	ENSG00000039523	A0A0A0MTL6	16	0.00010271031761305078	0.001953963549785816	0.3618379188571725	0.00850667747471988	0.2497458257304394	0.09037110431684171
ENSG00000039560_Q9P0K7	ENSG00000039560	Q9P0K7	5	0.3276900257228143	0.5613619018264003	0.09419106762685403	0.14906040518474634	0.13848931192044234	0.45557297500643373
ENSG00000039650_Q96T60	ENSG00000039650	Q96T60	19	8.296256110293588e-06	0.0002840907159930264	-0.4107736399210746	0.5296347057815367	-0.06056804033029421	0.7953051265269492
ENSG00000040275_Q96EA4	ENSG00000040275	Q96EA4	5	0.8201060812125033	0.9154519084337412	0.021930468920019885	0.3357546038759888	-0.09263982814243656	0.6562136499448359
ENSG00000040341_E9PH62	ENSG00000040341	E9PH62	8	1.3187191955151065e-05	0.00041356861898951487	-0.40232258737777576	0.22264609917769435	-0.117214568382327	0.5513223468621221
ENSG00000040633_Q9BUL5	ENSG00000040633	Q9BUL5	17	0.32032233170302576	0.5534777946286424	0.095629756772487	0.2948180422056697	0.10078246193505004	0.6239195171356194
ENSG00000040933_Q96PE3-3	ENSG00000040933	Q96PE3-3	2	0.9581457283925329	0.9813207230508167	-0.005061621688809043	0.30232018129155985	0.09923749452632788	0.6302190307041108
ENSG00000041357_H0YL69	ENSG00000041357	H0YL69	15	0.8509165162807634	0.9335205988807668	0.018125837067600327	0.3725470210101776	0.08584501733812798	0.6913619830760221
ENSG00000041802_Q9H089	ENSG00000041802	Q9H089	3	0.02485261184954391	0.11069887239824984	0.21388835438529916	0.02127584278178604	0.21941101135913116	0.15978083102007193
ENSG00000042088_Q9NUW8	ENSG00000042088	Q9NUW8	14	0.006710392452403268	0.04360439362553919	-0.25705082497137194	0.938270514588006	-0.007469196673141992	0.9813709554971459
ENSG00000042429_Q9NVC6	ENSG00000042429	Q9NVC6	11	0.06663517258400609	0.208100435374102	-0.17552196175593632	0.1229747869107428	-0.14794223247512678	0.41180161262426473
ENSG00000042445_Q6NUM9	ENSG00000042445	Q6NUM9	2	0.05941093751933321	0.19380447434859727	-0.1803245991042293	0.7650382417534133	0.028819561011409138	0.9155305392625379
ENSG00000042493_P40121	ENSG00000042493	P40121	2	0.00014073129936522733	0.0024814905214334956	0.35512352941162234	1.7767490854908737e-06	0.4373371011611612	0.00016495441509644255
ENSG00000042753_M0R0N4	ENSG00000042753	M0R0N4	19	0.9458536901511791	0.9765135808510544	0.006550151009042189	0.20380610174700933	0.12210525936017337	0.5290589914011063
ENSG00000043093_Q96GG9	ENSG00000043093	Q96GG9	3	0.015565420211542957	0.07875953437709635	-0.2301615636775291	0.5744111891467993	0.05412229327194471	0.824820004943781
ENSG00000043355_O95409	ENSG00000043355	O95409	13	1.8539207396681088e-08	1.5588035584866441e-06	-0.5049272216953615	0.00015073405759405048	-0.35363962030285523	0.0054247324322892546
ENSG00000043514_Q9H3H1	ENSG00000043514	Q9H3H1	1	0.9971727616055804	0.9984055220137676	-0.00034175642170839084	0.8002563381467375	-0.024399201650325532	0.9329793113978896
ENSG00000044090_Q14999	ENSG00000044090	Q14999	6	0.2690966212388588	0.5030177325311804	-0.1062868408141662	0.80036918050412	0.02438512418243683	0.9329793113978896
ENSG00000044115_P35221	ENSG00000044115	P35221	5	0.12051994775807573	0.3066487136617913	0.14890855701915878	0.9601434491755244	-0.004819825115857079	0.9894914632268998
ENSG00000044446_P46019	ENSG00000044446	P46019	X	3.2190679511169277e-10	3.921691436601103e-08	0.5547031217755631	5.5233950130978585e-08	0.4900306226139961	8.228574059047646e-06
ENSG00000044459_Q9NXG0-2	ENSG00000044459	Q9NXG0-2	9	1.4092542448066213e-05	0.00043128626284299256	-0.4010927508009575	0.3974945730328821	-0.08146932530197122	0.70968512676941
ENSG00000044574_P11021	ENSG00000044574	P11021	9	0.0372152618332751	0.14179413071023966	0.19892646125491129	0.43088009407285455	-0.07586125237299196	0.7343670862742415
ENSG00000046604_Q14126	ENSG00000046604	Q14126	18	0.9363870291639456	0.9711872674776678	-0.007697566881448996	0.7006253543868833	-0.037069246344501684	0.8898108683985675
ENSG00000046647_Q9NWZ8	ENSG00000046647	Q9NWZ8	X	4.336318064090661e-25	1.373528746800717e-21	0.7940023481036651	0.5642108267047823	0.05556877777510566	0.8203210521722277
ENSG00000046651_O75665	ENSG00000046651	O75665	X	9.028499872382514e-13	1.9065182230514407e-10	0.6147802193495644	0.01180404322317352	0.23931155707824545	0.11185902498173013
ENSG00000046653_B7Z613	ENSG00000046653	B7Z613	X	8.079632927844805e-08	5.951683092778702e-06	0.4846692471567981	0.047003320998708985	0.18982625882133605	0.2482302343921927
ENSG00000046889_Q70Z35	ENSG00000046889	Q70Z35	8	0.0008291266384055022	0.009430013023875864	-0.3142083939658825	0.007309709270764336	-0.25443931174461965	0.08258553366581364
ENSG00000047056_Q9Y2I8	ENSG00000047056	Q9Y2I8	10	0.03429878296196051	0.13466691074342182	-0.2020263593043504	0.04077086669268113	-0.19541190155752425	0.22991036270538318
ENSG00000047188_Q9H6S0	ENSG00000047188	Q9H6S0	5	0.013746610166667528	0.0726311721483226	-0.2343123725186893	0.04213112306480482	-0.19413496164451466	0.2344847735474715
ENSG00000047230_Q9NRF8	ENSG00000047230	Q9NRF8	X	1.313811017223193e-12	2.582596469612406e-10	0.6112948348248595	5.714910249183149e-09	0.5202253489712776	1.076756325184331e-06
ENSG00000047249_Q9UI12-2	ENSG00000047249	Q9UI12-2	8	0.3661852245649527	0.598036452080169	-0.08698913894318516	0.2568200890088148	0.1090397389577285	0.5858936930877734
ENSG00000047315_C9J2Y9	ENSG00000047315	C9J2Y9	4	0.11343339724661715	0.2948709772496182	-0.15178617849540402	0.31234484088113545	0.09721178649814037	0.6379223149050204
ENSG00000047410_P12270	ENSG00000047410	P12270	1	0.005199987559979553	0.036806615857508905	-0.2646877016257527	0.25374697484666264	-0.1097428635545092	0.5830858427902454
ENSG00000047644_Q9ULE0	ENSG00000047644	Q9ULE0	X	0.4868895905203783	0.7045039608328815	-0.06698152504940336	0.6403184847682679	0.045042801252643566	0.8569874190404343
ENSG00000047849_E7EVA0	ENSG00000047849	E7EVA0	3	0.3171148145926657	0.5510225584359006	-0.09626274627023054	0.4182525757962293	0.07795160081280048	0.7264983732512594
ENSG00000047932_Q9HD26-2	ENSG00000047932	Q9HD26-2	6	0.2293040249656973	0.4526771574190378	-0.11555647864676664	0.2334212278097262	0.11454798351179928	0.5613642078198197
ENSG00000048028_Q96RU2-2	ENSG00000048028	Q96RU2-2	11	0.018950430710653842	0.09126241772323442	0.22344639647621914	0.022795529008245736	0.2169741927536425	0.16384354028252743
ENSG00000048162_Q9Y3C1	ENSG00000048162	Q9Y3C1	5	0.6968731832014389	0.847525304393565	0.037557567923735526	0.2335135507885644	-0.11452551255113495	0.5613642078198197
ENSG00000048392_Q7LG56	ENSG00000048392	Q7LG56	8	0.010278609939485069	0.05908801630366416	-0.2437700230204446	0.15070089099215225	-0.13793814201233276	0.457530761941103
ENSG00000048544_P82664	ENSG00000048544	P82664	6	0.014989953793762938	0.07695409828483649	-0.2314271027496233	0.9506781143436772	0.005965763491880109	0.9860288042556886
ENSG00000048649_Q96T23	ENSG00000048649	Q96T23	11	0.2609423663564423	0.4925714811883379	-0.10810555141220143	0.2962270257304507	-0.10049034089600913	0.625042927150615
ENSG00000048707_Q5THJ4-2	ENSG00000048707	Q5THJ4-2	1	0.36830099801169625	0.5994827395693977	-0.08660728949819654	0.21875206346767495	0.11820060490848144	0.5482494986595954
ENSG00000048740_E9PC62	ENSG00000048740	E9PC62	10	0.02361054435188054	0.10676145501010935	0.21572416207576645	0.1046925165613419	0.1555347597011619	0.3769872181517461
ENSG00000048828_Q9NZB2-6	ENSG00000048828	Q9NZB2-6	9	0.326966949413564	0.5604263053395367	-0.09433133832083368	0.6233090169400318	-0.04734541802804496	0.8510054481069573
ENSG00000048991_Q15032	ENSG00000048991	Q15032	2	0.007446294034527018	0.04698094026836347	-0.2538707694135688	0.6735254391319374	-0.04061817818484705	0.8737737268874448
ENSG00000049239_R4GMU1	ENSG00000049239	R4GMU1	1	0.2727458146922985	0.5064023259307476	-0.10548502032117127	0.5783864376184269	0.05356183630475653	0.8265290635809731
ENSG00000049245_Q15836	ENSG00000049245	Q15836	1	0.9333500824371428	0.9699430400655019	-0.008065882999578316	0.9927606427991288	0.0008751031341511932	0.9979075607201088
ENSG00000049283_Q9H201	ENSG00000049283	Q9H201	17	0.5627028032534691	0.7551361394035176	-0.055783671273749925	0.3077217266724593	-0.0981406352910547	0.6350726098787932
ENSG00000049449_Q15293	ENSG00000049449	Q15293	11	0.16035850881217278	0.3652898789374738	-0.13478151707650068	0.010329092056747455	-0.2436134646724238	0.10274559583155932
ENSG00000049541_P35250	ENSG00000049541	P35250	7	0.7640375175287436	0.8855063434951684	0.0289459989612592	0.2754806401747079	-0.10488884261664397	0.6036911835997291
ENSG00000049618_Q8NFD5-3	ENSG00000049618	Q8NFD5-3	6	0.14097179848426772	0.33662131300333054	-0.14127584455517542	0.8377089455325744	-0.01975303034315295	0.9466155415561248
ENSG00000049656_Q96KA5-2	ENSG00000049656	Q96KA5-2	5	0.8808189302015518	0.9471621245599562	-0.014459810098643831	0.2135628932873797	-0.11953411157310626	0.5416650549424343
ENSG00000049759_Q96PU5	ENSG00000049759	Q96PU5	18	0.6871345056801024	0.8413214328340642	-0.038829480668403984	0.4462571731655629	0.07336247452727733	0.7480123280786625
ENSG00000049860_P07686	ENSG00000049860	P07686	5	0.4335421167891838	0.6600551093149434	-0.07542509049062028	0.18845089320304348	0.12633719169827748	0.5097228092078279
ENSG00000049883_Q8WV60	ENSG00000049883	Q8WV60	5	0.13713136085720365	0.3315752561184676	-0.14264144704217535	0.5695743556018208	-0.05480667051345653	0.8219629020016365
ENSG00000050327_Q12774	ENSG00000050327	Q12774	7	0.4744507540119181	0.6944211819634055	0.06890300366723841	0.03999325317803941	0.1961579614404065	0.22793307816594346
ENSG00000050393_Q96AQ8	ENSG00000050393	Q96AQ8	6	0.19266180273726932	0.4079253076004683	0.1251525564146542	0.5076464390789891	-0.06383227357897713	0.7815550767582625
ENSG00000050405_Q9UHB6	ENSG00000050405	Q9UHB6	12	0.08350733889415769	0.24181229213901573	-0.16576463147450882	0.7573940910138339	0.029786629621673087	0.9108065603594181
ENSG00000050748_P45984-2	ENSG00000050748	P45984-2	5	0.026951365497788475	0.11662356586645492	-0.2109571663607364	0.4215913362386938	-0.07739540380495108	0.7296066255100288
ENSG00000050820_P56945	ENSG00000050820	P56945	16	0.34776131381412817	0.5794497430332725	0.09037347675240293	0.4980754383473866	0.06527582729739001	0.776619267108962
ENSG00000051128_Q9NSC5-2	ENSG00000051128	Q9NSC5-2	19	0.9283892308428721	0.9682821497184054	0.008667779281532883	0.9401924468935092	0.007236207379428511	0.9820435047774042
ENSG00000051180_Q06609	ENSG00000051180	Q06609	15	0.9191389452649368	0.9636117747544757	0.009791016955922341	0.2696386773287459	0.10616727441406837	0.5980701937231273
ENSG00000051341_A0A087WXL3	ENSG00000051341	A0A087WXL3	3	0.2241933237138279	0.4462784492810111	-0.11682616559478988	0.523037768302307	0.06154002062492811	0.7910903641811141
ENSG00000051382_P42338	ENSG00000051382	P42338	3	0.00241139880297133	0.02069947346453032	-0.2864869176615875	0.3220489395361912	-0.09529070957477763	0.6444778998997794
ENSG00000051596_Q96J01	ENSG00000051596	Q96J01	5	0.039460035097685434	0.1471332091488153	-0.19667658632971555	0.007615472150475677	-0.25317920412565426	0.08396680653347192
ENSG00000051620_Q9Y5Z4	ENSG00000051620	Q9Y5Z4	6	0.564955561982285	0.7563384372691834	0.05546275354808319	0.6966314759955715	0.03758905708635176	0.8870150746908249
ENSG00000052126_Q9HAU0-6	ENSG00000052126	Q9HAU0-6	12	0.27063342783440325	0.5049403527051161	0.10594827523210054	7.663845904661781e-07	0.4509360730251065	8.048294568075963e-05
ENSG00000052344_Q16651	ENSG00000052344	Q16651	16	0.006705030330896647	0.04360439362553919	0.2570751084506697	0.4844308144945446	0.06735923609624507	0.7710917169733967
ENSG00000052749_Q5JTH9	ENSG00000052749	Q5JTH9	10	0.5052935822462752	0.715699075391027	0.06418582248826082	0.831202390018824	0.02055666331487386	0.9440926436986856
ENSG00000052802_Q15800	ENSG00000052802	Q15800	4	0.9893066953938999	0.9944871335005325	0.0012926415631032426	0.20815040048682326	-0.12094980554581294	0.5346477407853207
ENSG00000052841_Q96AE7	ENSG00000052841	Q96AE7	11	0.19319602538743186	0.40851028732622857	-0.12500361285234438	0.4901233862842562	-0.06648630058312732	0.7738070036692866
ENSG00000053254_O00409-2	ENSG00000053254	O00409-2	14	0.12666691601705224	0.31616820841923793	-0.1465164515326135	0.5387759143330872	-0.059231155676070985	0.80193058309459
ENSG00000053371_O43488	ENSG00000053371	O43488	1	0.020443018104845875	0.09593075532903601	-0.2208105482704772	0.21452675218650424	-0.1192846934230456	0.5425417980681982
ENSG00000053372_Q9UKD2	ENSG00000053372	Q9UKD2	1	0.4161513643827237	0.6459982586043996	0.07830295914872916	0.21445645024855825	-0.11930285850969573	0.5425417980681982
ENSG00000053900_Q9UJX5	ENSG00000053900	Q9UJX5	4	0.032761448710958235	0.13053067772573612	-0.20375079123376866	0.33391458616881264	0.0929916522854226	0.6545461563639577
ENSG00000054116_O43617	ENSG00000054116	O43617	1	0.7403556941831451	0.87304690360924	0.031953012401551836	0.4208221824934586	0.07752330866325813	0.7291187905852979
ENSG00000054118_Q9Y2W1	ENSG00000054118	Q9Y2W1	1	0.4135550423231281	0.6440647269872981	-0.07873853780360651	0.4499581918419339	-0.07276833992741122	0.7504593554387203
ENSG00000054148_Q9NRX4	ENSG00000054148	Q9NRX4	9	0.8753663533837641	0.9445487734093249	-0.01512660717363476	0.35153823958177033	-0.0896707505506158	0.6702243936788157
ENSG00000054267_Q4LE39	ENSG00000054267	Q4LE39	1	0.1284033635242223	0.3187442429176913	-0.14585690577878216	0.025979099567955848	-0.21228992987903766	0.17685665444455384
ENSG00000054523_O60333-2	ENSG00000054523	O60333-2	1	0.00778125352179315	0.04828035363424055	-0.2525145735232421	0.12532730735481412	0.147030026297493	0.41655895084593214
ENSG00000054523_O60333-3	ENSG00000054523	O60333-3	1	0.00778125352179315	0.04828035363424055	-0.2525145735232421	0.05474215624283349	0.1836889933089479	0.2680739471952985
ENSG00000054611_Q8WUA7	ENSG00000054611	Q8WUA7	22	0.056969510935261224	0.18856539982618062	0.18205572928999614	0.037784177213888784	0.1983457089877894	0.21904564636395613
ENSG00000054654_Q8WXH0-2	ENSG00000054654	Q8WXH0-2	14	0.011905584228299395	0.06541359591177509	-0.23903304801345626	0.08340702278518883	-0.16581775175524982	0.3359973634935335
ENSG00000054983_P54803	ENSG00000054983	P54803	14	2.5739765391591173e-07	1.6144694431260406e-05	-0.4677480420010534	0.0603990772676495	-0.17964046807328468	0.28221479866999466
ENSG00000055044_Q9Y2X3	ENSG00000055044	Q9Y2X3	2	0.9887801228134452	0.9942733457179643	0.0013562994157211346	0.7578938301460747	-0.029723317833006583	0.9108945358190909
ENSG00000055070_Q7Z422-2	ENSG00000055070	Q7Z422-2	1	0.9412368370703974	0.9736237073092103	-0.007109617067953481	0.9252979325367024	0.009043011056391662	0.9779450208209611
ENSG00000055130_Q13616	ENSG00000055130	Q13616	7	0.04096486605199666	0.15079164813445603	-0.19522762953596348	0.05857223583197645	-0.18091261073922166	0.27711502417994177
ENSG00000055147_Q9NRY5	ENSG00000055147	Q9NRY5	5	0.18523683315055292	0.39882254042760185	-0.1272544070471928	0.5086873010495482	0.06367614064453167	0.7816187265686239
ENSG00000055163_E7EVJ5	ENSG00000055163	E7EVJ5	5	0.00012340630214275193	0.0022400542237086918	-0.35794241198947063	0.9829702662171096	0.0020587031729892707	0.9958581699610325
ENSG00000055208_Q9NYJ8	ENSG00000055208	Q9NYJ8	6	0.02888450401903863	0.12097710181153694	-0.20842447175268952	0.08062206420798443	0.16731326947495048	0.32937815262522213
ENSG00000055332_P19525	ENSG00000055332	P19525	2	0.1313108532925655	0.32204965373921896	-0.1447677107693698	0.11320868803910818	0.15187967957496967	0.3930703824273859
ENSG00000055483_Q9P275	ENSG00000055483	Q9P275	17	0.0008230526887571037	0.009387925899770227	0.3143903199144672	0.4863464893640026	0.06706486718495379	0.7724156730463558
ENSG00000055609_Q8NEZ4-3	ENSG00000055609	Q8NEZ4-3	7	0.6220269544792413	0.8001097982996942	0.0475200434287832	0.12046714318736555	0.14892950918135514	0.4061644838201388
ENSG00000055917_Q8TB72-3	ENSG00000055917	Q8TB72-3	2	0.04180638692452899	0.15220888572809835	-0.19443664494932106	0.7250629149614991	-0.033911058377666045	0.8997085412785741
ENSG00000055950_Q8N983-4	ENSG00000055950	Q8N983-4	10	0.9736202077583388	0.9874934383844183	0.0031893543082729906	0.4579894426634006	-0.07148837030044239	0.7541391580384349
ENSG00000056050_Q9NWY4	ENSG00000056050	Q9NWY4	4	0.03336624669165121	0.13235765359524762	-0.20306440552534716	0.2317644838129666	-0.1149522877502547	0.5602578427569298
ENSG00000056097_Q96KR1	ENSG00000056097	Q96KR1	5	0.014003979332762026	0.07357081317780677	-0.23369700974594296	0.07075961737116232	-0.17296714563018525	0.30668884227311627
ENSG00000056277_Q8ND82	ENSG00000056277	Q8ND82	X	1.5989093757988327e-05	0.0004823376616993146	0.3987406672225079	0.020856953827847247	0.22010893848742014	0.15793102390211522
ENSG00000056661_P35227	ENSG00000056661	P35227	17	0.1010068973606683	0.27298579128832495	-0.1571890332498475	0.06472332745257889	-0.17674998391258198	0.29337465175137045
ENSG00000056998_O15488-2	ENSG00000056998	O15488-2	X	2.324092795942358e-17	9.201954913934274e-15	0.6981095524085541	0.026765021470598928	0.21120939500358926	0.17878699430725417
ENSG00000057019_Q96PD2	ENSG00000057019	Q96PD2	3	0.0021770441817570607	0.019269886318099817	-0.28926213957438623	0.4823114232642561	-0.06768563467783001	0.7684922401150877
ENSG00000057294_Q99959	ENSG00000057294	Q99959	12	0.08985302050594407	0.25281640062538174	0.16250332591708508	0.078786203896166	0.1683218975492956	0.3247113847912636
ENSG00000057608_P50395	ENSG00000057608	P50395	10	0.005749576266882394	0.03950495189880691	-0.26170461654010824	0.9385692690952144	0.007432976896378373	0.9813709554971459
ENSG00000057663_Q9H1Y0	ENSG00000057663	Q9H1Y0	6	0.9743434206961388	0.9875944912176062	0.003101886686592613	0.6437959231775492	-0.04457520026482532	0.8581787704201482
ENSG00000057757_Q9GZP4-2	ENSG00000057757	Q9GZP4-2	1	0.06829259114566061	0.21145335528238512	0.17448030682972324	0.7563361315170275	-0.02992070400949976	0.910259171010343
ENSG00000057935_E7EV10	ENSG00000057935	E7EV10	2	0.0576677552345339	0.18998625089947982	0.18155451850241455	0.4716660645046878	0.0693368760317537	0.761848918108177
ENSG00000058056_Q92995	ENSG00000058056	Q92995	3	0.0006130411151537763	0.007644912331691285	-0.321587185161162	0.27605549850463884	-0.10476403387797067	0.603759482219432
ENSG00000058063_Q9Y2G3	ENSG00000058063	Q9Y2G3	3	0.5496851455579097	0.7470497027967102	-0.05765028046878708	0.6531575996522427	-0.04332145336719491	0.8629865191466723
ENSG00000058091_O94921	ENSG00000058091	O94921	7	3.201778772443169e-05	0.0007975413996598715	-0.3854761514042417	0.03168741568809625	-0.20499653517113764	0.1990093969587692
ENSG00000058262_B4DR61	ENSG00000058262	B4DR61	3	0.2770695183390155	0.5096781791133393	0.1045443031715636	0.5594225155617917	-0.0562520621489932	0.8166956779145027
ENSG00000058272_O14974	ENSG00000058272	O14974	12	0.4084872380281453	0.6389547291131606	-0.07959337753253322	0.28244236357329794	0.10338896144170033	0.6112587098143739
ENSG00000058453_Q5TZA2	ENSG00000058453	Q5TZA2	1	8.475087383122212e-06	0.0002886541858713936	-0.4103897285155427	0.0904801872116958	-0.16219104874600174	0.34785326802184485
ENSG00000058600_Q9NVU0	ENSG00000058600	Q9NVU0	16	0.4965195109280428	0.710515270325085	0.06551186712247953	0.10493631513321686	0.15542695069383616	0.377076416047493
ENSG00000058668_P23634-8	ENSG00000058668	P23634-8	1	0.014305184935975976	0.07458711651803111	0.2329892127253967	0.08391360380484214	0.1655500220866712	0.3359973634935335
ENSG00000058673_O75152	ENSG00000058673	O75152	1	0.0003626838515577565	0.004989957263470492	-0.33398819971042765	0.028148599305303668	-0.20937112886118567	0.18399992566303602
ENSG00000058729_Q9BVS4	ENSG00000058729	Q9BVS4	5	0.7565113445630989	0.881310302118986	0.029898495459657063	0.00010540925643647212	0.3612905208109676	0.004117388394707563
ENSG00000058799_C9JFB2	ENSG00000058799	C9JFB2	1	0.724617149737441	0.8637538319221566	-0.03396833651452665	0.7999831666007654	0.0244332828540451	0.9329496022655203
ENSG00000058804_Q9BTX1-5	ENSG00000058804	Q9BTX1-5	1	0.01284875831721324	0.06927394377833693	-0.2365407624922914	0.7135101536942972	-0.03539940228191379	0.8962247146207191
ENSG00000059573_P54886	ENSG00000059573	P54886	10	0.9740577328438252	0.9875478871072554	-0.0031364383593347578	0.019688768149828763	-0.22212101491125505	0.151776472644769
ENSG00000059588_Q13395	ENSG00000059588	Q13395	1	0.0076560598619804295	0.04773734175752561	-0.2530153115014854	0.2462118234733114	-0.11149202320593482	0.5752083463530308
ENSG00000059758_Q00537	ENSG00000059758	Q00537	12	0.29168432249997345	0.5239352121761758	0.1014354933578834	0.051270918390093394	0.18634685439378426	0.2584118829322882
ENSG00000059804_P11169	ENSG00000059804	P11169	12	0.18036199785774068	0.3919702423426371	0.12866799250841182	0.3606437210899912	0.08799573983890982	0.6798951375228027
ENSG00000060069_Q9Y5B0	ENSG00000060069	Q9Y5B0	18	0.7648102260861571	0.885895372444933	0.02884836567368792	0.16021475714932598	-0.13482744693964044	0.47323045709798184
ENSG00000060138_P16989	ENSG00000060138	P16989	12	0.7030304445142228	0.8518970118188485	-0.03675673244755052	0.6837444332893636	-0.039273796712235326	0.8777892883654838
ENSG00000060237_Q9H4A3-7	ENSG00000060237	Q9H4A3-7	12	0.2252978255774155	0.44713713190254617	-0.11655005477632385	0.6093112375303389	-0.04926048823630557	0.841947574278587
ENSG00000060339_Q8IX12-2	ENSG00000060339	Q8IX12-2	10	0.4307367032026447	0.6578392031795454	0.07588479004692779	0.5651092736072545	-0.055440878649752084	0.820689020109649
ENSG00000060491_Q9NZT2-2	ENSG00000060491	Q9NZT2-2	20	0.3835224115660048	0.6150922727267444	0.08389886570575879	0.31087311803087336	0.09750649955240023	0.6379223149050204
ENSG00000060688_Q96DI7	ENSG00000060688	Q96DI7	1	0.057057993712075386	0.1886546921534434	-0.1819919371356984	0.051548650926394095	-0.18612882811846426	0.2585673743752373
ENSG00000060749_Q2KHR3	ENSG00000060749	Q2KHR3	11	0.044041249086406366	0.1578778215234796	-0.1923986787406045	0.6306332449650661	-0.046350723101755684	0.8539453652426771
ENSG00000060971_P09110	ENSG00000060971	P09110	3	0.8550416864730341	0.9346703161215347	-0.017618672263980808	0.3535315603921817	-0.08930177909677145	0.6726234558575337
ENSG00000060982_P54687-4	ENSG00000060982	P54687-4	12	2.733222992659251e-05	0.0007214569857706814	-0.3885490803517795	0.0067767184900348575	-0.256751867129528	0.07864165177525259
ENSG00000061273_J3KPH8	ENSG00000061273	J3KPH8	12	0.011890224787671565	0.06538591495650986	0.2390750426110337	0.8835204726603263	-0.01412969205988708	0.9645937025347671
ENSG00000061676_Q9Y2A7	ENSG00000061676	Q9Y2A7	2	0.08981909528271832	0.25281640062538174	-0.16252026713070625	0.026506062571407564	-0.2115624070118966	0.17779878202349408
ENSG00000061794_P82673	ENSG00000061794	P82673	12	0.01453799801253979	0.0754285154868465	-0.23245095804345156	0.01441561679676964	-0.23273295634372534	0.12513067913293538
ENSG00000061936_Q12872	ENSG00000061936	Q12872	12	0.0029713744744311703	0.02422607116540729	-0.280731535111828	0.004289348018914306	-0.27031376156609666	0.05872109146279372
ENSG00000061987_Q7Z3U7-5	ENSG00000061987	Q7Z3U7-5	12	0.04137219030240732	0.1513238022896942	-0.194843089057618	0.2909121915985676	-0.10159710936031856	0.6197484201464663
ENSG00000062038_P22223	ENSG00000062038	P22223	16	0.8523555850045046	0.9339782832708945	-0.017948856797895974	0.3744139740109321	-0.08551153187664384	0.6917899074318962
ENSG00000062194_D4PHA4	ENSG00000062194	D4PHA4	5	0.5847755443042328	0.7721119359364327	-0.05266478028656522	0.3857264070029229	0.0835121363001475	0.7006816010584792
ENSG00000062485_B4DJV2	ENSG00000062485	B4DJV2	12	0.21493074700146508	0.4369660726104882	-0.11918038847575554	0.18043344611075748	-0.1286470736249289	0.49907454913018673
ENSG00000062598_Q5JVZ5	ENSG00000062598	Q5JVZ5	20	0.05532719981868575	0.18504056266171454	-0.18325478418316465	0.2653435311188535	0.10711920459620568	0.5951647970403976
ENSG00000062650_Q7Z5K2-2	ENSG00000062650	Q7Z5K2-2	10	0.5857776758464487	0.7727825023921808	-0.05252448678832203	0.9460952939382866	0.006520879826502115	0.9840833662023931
ENSG00000062822_M0R2B7	ENSG00000062822	M0R2B7	19	0.8180117677785259	0.9139372580341152	-0.02219024527563529	0.1775485003517378	-0.12949661157653836	0.4943390962725523
ENSG00000063046_E7EX17	ENSG00000063046	E7EX17	12	0.032513243413418984	0.13011459066583023	-0.20403557882195889	0.35540665710308306	-0.08895587326392727	0.6744258221212244
ENSG00000063169_Q9NZM4-2	ENSG00000063169	Q9NZM4-2	19	0.2273653323151125	0.45011230631757426	0.11603575629285105	0.9117209962424146	0.010692698786380768	0.9742891024340705
ENSG00000063177_G3V203	ENSG00000063177	G3V203	19	0.4388558656168133	0.6643814883621283	0.07455899275356281	0.37955518509934333	0.08459838264602673	0.6955052317681434
ENSG00000063241_Q96AB3	ENSG00000063241	Q96AB3	19	0.001957097329438692	0.017949013125735463	0.2921243079014772	0.6749906275628071	-0.04042494896222392	0.8746719484015296
ENSG00000063244_P26368-2	ENSG00000063244	P26368-2	19	0.8846778728315398	0.9492282295626928	-0.013988312395964415	0.10822157182353606	-0.15399295718151124	0.383232387563058
ENSG00000063245_Q9Y6I3	ENSG00000063245	Q9Y6I3	19	0.4217096463303951	0.6503239068897403	0.07737574165068069	0.2772608781026997	-0.10450289754766827	0.6051561107754325
ENSG00000063601_F8WA39	ENSG00000063601	F8WA39	X	0.00011032463540418818	0.0020317051316439886	0.36032626074615376	0.00010479457361818088	0.3614140341231836	0.004117388394707563
ENSG00000063660_P35052	ENSG00000063660	P35052	2	0.00969755578244408	0.05662335368746962	0.24562237635184375	0.07933138273099483	0.16802042487887164	0.3263948861751785
ENSG00000063854_Q16775	ENSG00000063854	Q16775	16	0.6777810531534753	0.8356837235747889	-0.04005738930865484	0.25383869801966785	0.10972179310249884	0.5830858427902454
ENSG00000064042_G5EA03	ENSG00000064042	G5EA03	4	0.5890598334537612	0.7750143395492373	-0.05206576706851535	0.9320843710639609	0.008219420429639239	0.9793262924038708
ENSG00000064102_Q9NVM9	ENSG00000064102	Q9NVM9	12	0.0729172867489853	0.22112542439196836	-0.17167831531525532	0.7609645140204695	-0.02933457008656285	0.9130433932974579
ENSG00000064300_P08138	ENSG00000064300	P08138	17	0.031588375679024706	0.12757149069797472	0.2051131981896746	0.22832742257277935	0.11579755407725817	0.5579350652155088
ENSG00000064313_Q6P1X5	ENSG00000064313	Q6P1X5	8	0.5293009746702059	0.7323518301087765	-0.0606170648938846	0.32156994453616816	0.09538465037642199	0.6444778998997794
ENSG00000064419_Q9Y5L0	ENSG00000064419	Q9Y5L0	7	0.8465087912518648	0.9306370414982945	-0.01866828751007962	0.03256478527076211	0.2039762896819252	0.20163242646594776
ENSG00000064601_X6R5C5	ENSG00000064601	X6R5C5	20	0.22408964267249867	0.4462784492810111	0.11685213365322113	0.8453959943919114	-0.01880532880311196	0.9491073852216236
ENSG00000064607_M0R2Z9	ENSG00000064607	M0R2Z9	19	0.6860640545989762	0.8405933146353223	-0.038969689807993285	0.9396601818745652	0.007300727824872791	0.9819678833749534
ENSG00000064651_P55011	ENSG00000064651	P55011	5	0.012592080773702972	0.06836431159050829	-0.23720276572933935	0.004750748185575296	-0.2673426298080917	0.0631396117775837
ENSG00000064652_A8MXB7	ENSG00000064652	A8MXB7	5	0.7822999687579464	0.8947353922757605	0.02664608019113849	0.6687681144164364	0.04124669123687874	0.8715264497202933
ENSG00000064666_B4DUT8	ENSG00000064666	B4DUT8	19	0.06306023993708472	0.20155732593412296	0.1778424627461349	0.01865846145974431	0.2239828168597818	0.14758071902099942
ENSG00000064703_Q9UHI6	ENSG00000064703	Q9UHI6	1	0.9361402131992372	0.9711774606497424	0.007727496129616444	0.0508028509749174	0.1867165139893051	0.25714876973157064
ENSG00000064933_P54277-3	ENSG00000064933	P54277-3	2	0.0020775182353119748	0.018641753570398528	-0.29052324180643546	0.04064524743877497	-0.19553161333710767	0.22960622142221557
ENSG00000064961_Q9P0W2	ENSG00000064961	Q9P0W2	19	0.4927333732148209	0.7086878895678973	-0.06608786917873491	0.29758013197484523	0.10021066650724704	0.625945050171055
ENSG00000064999_Q92625	ENSG00000064999	Q92625	6	0.0339188528822876	0.1337124660916565	-0.20244636843072697	0.5379147874297573	0.05935661057179949	0.8015543447953071
ENSG00000065000_O14617-5	ENSG00000065000	O14617-5	19	0.9958128225930768	0.9982315826181761	-0.0005061470211729682	0.9605765903333128	0.004767403338973843	0.989540210626775
ENSG00000065054_Q15599	ENSG00000065054	Q15599	16	0.00050896185846518	0.006607117568395319	-0.3260429593842321	0.001094355947554818	-0.3072560076718868	0.02336814733345388
ENSG00000065057_P78549-2	ENSG00000065057	P78549-2	16	0.038441842740461175	0.14461346422851634	-0.19768343004978856	0.007097059578951431	-0.2553434699959821	0.08090188088334808
ENSG00000065060_Q6BDS2	ENSG00000065060	Q6BDS2	6	0.5006282853019199	0.7128523684845275	-0.06488938727216967	0.1598658242863686	0.13493906183845428	0.47280063060478617
ENSG00000065135_P08754	ENSG00000065135	P08754	1	0.026587593538329204	0.11552291156743176	0.21145094862259547	0.09633052630682627	-0.15935770327332835	0.35919287050147214
ENSG00000065150_O00410	ENSG00000065150	O00410	13	0.05619152991732687	0.1868626467329479	-0.1826201470459708	0.5223559439700175	0.06164083128055928	0.7910903641811141
ENSG00000065154_P04181	ENSG00000065154	P04181	10	0.5004996234015812	0.7128523684845275	0.06490883889343654	0.3832029416751945	-0.08395503343502027	0.6983947056979961
ENSG00000065183_Q9UNX4	ENSG00000065183	Q9UNX4	1	0.902777284473148	0.9569256674285669	-0.011781077295638908	0.10040591843727877	-0.15746325525543536	0.3677182744507706
ENSG00000065243_Q16513	ENSG00000065243	Q16513	1	0.005078787799601866	0.03627296585172246	-0.2653831846409977	0.4622686595758009	-0.07081145197484559	0.7570345070272106
ENSG00000065268_U3KQC1	ENSG00000065268	U3KQC1	19	0.5673313407835585	0.7577551103969185	-0.05512496758493859	0.2249538340443568	-0.11663594565347082	0.5534002537972924
ENSG00000065328_Q7L590	ENSG00000065328	Q7L590	10	0.2409442612648031	0.46692624506348357	-0.11273687903898395	0.4878293574257561	0.06683742905621808	0.7724156730463558
ENSG00000065357_P23743	ENSG00000065357	P23743	12	0.8577129019710555	0.9357002297204472	-0.017290519426832147	0.4773870673643368	-0.06844699858347576	0.7656839142553684
ENSG00000065427_Q15046	ENSG00000065427	Q15046	16	0.18591794349383065	0.3995217679896259	-0.12705907194107088	0.4638038994738589	-0.07056943813806925	0.7575216425402318
ENSG00000065485_Q14554	ENSG00000065485	Q14554	3	0.25556779105500793	0.4866075605778046	0.10932556319806536	0.6466126809293353	-0.044197196966665964	0.8595560975375227
ENSG00000065491_Q9NU19	ENSG00000065491	Q9NU19	6	0.6770228522075319	0.8350739425106531	-0.04015720378238788	0.7046302934849437	0.03654906144412472	0.8923950348205427
ENSG00000065518_O95168-2	ENSG00000065518	O95168-2	3	0.5865325470965164	0.7728509457410041	-0.05241888104806682	0.17285132725655927	-0.13090176087433744	0.4901004170584816
ENSG00000065526_Q96T58	ENSG00000065526	Q96T58	1	0.05180714399663566	0.17616653634926835	-0.18592677448520756	0.5663785932866533	-0.055260347777015176	0.8211723545346551
ENSG00000065534_Q15746-6	ENSG00000065534	Q15746-6	3	0.349033910735052	0.5806538404691582	-0.09013616896765378	0.27163496649046515	-0.10572833055848654	0.6002392533073196
ENSG00000065548_Q8WU90	ENSG00000065548	Q8WU90	2	0.9790642137900945	0.9902232187451045	0.002530997873246236	0.1293196105253572	0.14551164444335313	0.4243962218368024
ENSG00000065559_P45985	ENSG00000065559	P45985	17	0.492441164052205	0.7086878895678973	-0.06613242118895905	0.5484973753902773	0.057821653245404635	0.8083770539370949
ENSG00000065613_Q9H2G2	ENSG00000065613	Q9H2G2	10	0.5500427755132968	0.7470497027967102	0.05759871650405771	0.04732392162634114	0.1895559738446203	0.24861812053168444
ENSG00000065615_Q7L1T6	ENSG00000065615	Q7L1T6	6	0.8165137700407241	0.9130829184833164	-0.0223761526432472	0.6315455776272799	0.046227162911837434	0.8539453652426771
ENSG00000065665_Q9H9S3-3	ENSG00000065665	Q9H9S3-3	10	0.3073929449165437	0.5394277856083944	-0.09820703759190066	0.9993056940031574	-8.392750799911854e-05	0.9994617136275139
ENSG00000065675_A0A087X0I9	ENSG00000065675	A0A087X0I9	10	0.6766086852371117	0.8347558920434627	0.04021174533720804	0.9457318644473016	-0.006564910864133956	0.9840833662023931
ENSG00000065809_Q9H098-2	ENSG00000065809	Q9H098-2	10	0.3676100487205873	0.5989736776350104	-0.08673184174340208	0.9890282112391976	0.0013263077025772929	0.996589006143331
ENSG00000065833_P48163	ENSG00000065833	P48163	6	0.004975244103423715	0.03577544993778574	0.2659891691709172	0.002280563853228297	0.2880045577001295	0.038648920750741986
ENSG00000065882_Q86TI0	ENSG00000065882	Q86TI0	4	0.02484232485422345	0.11069887239824984	-0.21390323363352046	0.2737194898631844	-0.10527230440469096	0.6017145181463346
ENSG00000065883_Q14004	ENSG00000065883	Q14004	7	0.6874267845825269	0.8413540727067829	-0.038791211671878316	0.23681037915257505	-0.11372711560279272	0.5651062499423981
ENSG00000065911_P13995	ENSG00000065911	P13995	2	0.43137812118287855	0.658184103490736	0.0757795357870784	0.5758370982868525	-0.053921052162140916	0.825703105129819
ENSG00000065978_P67809	ENSG00000065978	P67809	1	0.12355165505509283	0.3109653296678638	-0.14771731347703493	0.4306346284061375	0.07590154840073422	0.7343670862742415
ENSG00000066027_Q15172	ENSG00000066027	Q15172	1	0.5080421378770013	0.7177624762379133	0.06377289788329397	0.07514101447002501	0.1703818341087192	0.3160560332862641
ENSG00000066032_P26232-2	ENSG00000066032	P26232-2	2	0.08401090782995893	0.24246428296254663	-0.16549874440622406	0.8800088450637097	-0.0145588317641094	0.9629501784681413
ENSG00000066044_Q15717	ENSG00000066044	Q15717	19	0.27790656164550503	0.5100940400063808	-0.10436332872947164	0.5420108417993662	-0.058760751443809475	0.804104088134956
ENSG00000066084_Q9P265	ENSG00000066084	Q9P265	12	0.030789097263492493	0.12608182205075316	-0.20606619606597024	0.060744251504811025	-0.17940364518328908	0.2834141843698612
ENSG00000066117_Q96GM5	ENSG00000066117	Q96GM5	12	0.6717593674177725	0.8321461854891649	-0.040851302222591285	0.7892032079509306	-0.025780655295311462	0.92729929386164
ENSG00000066135_O75164	ENSG00000066135	O75164	1	0.7955720052805819	0.9001139563101141	0.024984044640797697	0.08627657270379115	0.16431795860189746	0.3403752032025772
ENSG00000066136_Q13952	ENSG00000066136	Q13952	1	0.16746424830834486	0.3742102338742027	-0.13254839770706558	0.8261307371638542	-0.021184044658601613	0.9427487750696827
ENSG00000066279_Q8IZT6	ENSG00000066279	Q8IZT6	1	0.006579484663082404	0.043148069710794025	-0.25764864590515896	0.6283964884159416	-0.046653973204589964	0.8530425735945163
ENSG00000066422_O95625	ENSG00000066422	O95625	3	0.17672776240645702	0.3875286863429924	-0.12974014597428513	0.9092552470629478	0.01099262098411662	0.9733771912909832
ENSG00000066427_A0A087X1A8	ENSG00000066427	A0A087X1A8	14	0.3435269592056329	0.5757240747226003	-0.09116702603204582	0.20595624416119	0.12153120374900113	0.5306816398330905
ENSG00000066455_Q8TBA6	ENSG00000066455	Q8TBA6	14	0.0985581426579596	0.2685444446185695	0.1583145447802472	0.7148148314483829	-0.03523090953012622	0.8963771637044657
ENSG00000066557_Q9H9A6	ENSG00000066557	Q9H9A6	1	0.19076568757831916	0.40512927616783506	-0.12568363096433344	0.7204645893133612	0.034502487110894764	0.8982670609461643
ENSG00000066583_Q96CN7	ENSG00000066583	Q96CN7	5	0.035598356577595365	0.13776150819735286	-0.20061870862572365	0.2800585658866621	-0.10389972382639444	0.6085668836736626
ENSG00000066629_F8W717	ENSG00000066629	F8W717	14	0.0006209146593087536	0.007697640639375644	0.32127906816045365	0.0009766912270930534	0.3101256575931372	0.02150063230501065
ENSG00000066651_Q7Z4G4-2	ENSG00000066651	Q7Z4G4-2	6	0.1072593650531856	0.28382960635418997	-0.15440939099848264	0.8449350268085812	-0.018862108065839437	0.9488756594391144
ENSG00000066654_Q9NXG2	ENSG00000066654	Q9NXG2	16	0.9033278932044236	0.9572737041569126	0.011714031241254872	0.036313402722776535	0.19986254197932268	0.21479562127618326
ENSG00000066739_Q96BY7	ENSG00000066739	Q96BY7	14	0.4106802342697311	0.6414694424273806	0.07922270402581	0.15587607385152075	0.13622839457571526	0.4658520786656102
ENSG00000066777_Q9Y6D6	ENSG00000066777	Q9Y6D6	8	0.3017638023759698	0.533539963173812	-0.09935120205497486	0.5727780368818993	-0.054353069671265485	0.824087631208519
ENSG00000066855_Q15390	ENSG00000066855	Q15390	8	0.18152833808180954	0.393559897928906	-0.1283272631412235	0.8796512408539251	0.014602548725466003	0.9629501784681413
ENSG00000066926_P22830	ENSG00000066926	P22830	18	0.06566637927666454	0.206552389631415	-0.17614060819836075	0.002419024766697364	-0.28640077039991024	0.04004204820533156
ENSG00000066933_B2RTY4	ENSG00000066933	B2RTY4	15	0.3709694915639528	0.602124450181307	0.08612760106791335	0.5019009977220105	0.06469711404776275	0.7775520656365656
ENSG00000067057_Q01813	ENSG00000067057	Q01813	10	0.9306653291696	0.9692029824838009	0.008391582101689832	0.24885366054710184	0.11087461847808704	0.577592952704614
ENSG00000067064_Q13907-2	ENSG00000067064	Q13907-2	10	0.4376903995895412	0.663183133556504	-0.07474844205963742	0.003400265493606785	-0.2769510148234117	0.05094465644472926
ENSG00000067113_O14494	ENSG00000067113	O14494	5	0.0025865148913325323	0.02176038756519468	0.28456793977525285	0.17169224798293994	0.13125281531074154	0.48882690692387254
ENSG00000067141_Q92859-4	ENSG00000067141	Q92859-4	15	0.036916044083799227	0.14113647511820646	-0.19923490061392726	0.02411521675637484	-0.21496851166738173	0.16809801799927881
ENSG00000067225_P14618	ENSG00000067225	P14618	15	8.139650967998511e-06	0.00028024287436016613	0.4111162963005072	5.374115101718837e-06	0.4184891853928522	0.00041983635782452276
ENSG00000067248_A0A087WYN9	ENSG00000067248	A0A087WYN9	5	0.8687302452011817	0.9406972720029592	-0.015939104927806917	0.24797715886487126	-0.111078955730633	0.5770579085567185
ENSG00000067334_Q5QJE6	ENSG00000067334	Q5QJE6	1	0.3552146538610017	0.5867757059216286	0.08899124050022234	0.0537272992240324	-0.18445133876305425	0.2655687336644688
ENSG00000067369_Q12888	ENSG00000067369	Q12888	15	0.12729742679624728	0.31699260957320224	-0.14627617056014672	0.011676729080505526	-0.23966373281769246	0.11098089983637745
ENSG00000067533_Q9Y3B9	ENSG00000067533	Q9Y3B9	1	0.2542533539968676	0.4854415303104751	-0.10962660436537737	0.5029321056265877	-0.06454152738899104	0.7785845985123057
ENSG00000067560_P61586	ENSG00000067560	P61586	3	0.31151502183278706	0.5436494940249879	0.09737784678015036	0.5343280630221984	0.05988022330874075	0.7989975657610184
ENSG00000067596_Q14562	ENSG00000067596	Q14562	17	0.028815961124725925	0.12097710181153694	-0.20851177380907124	0.09199705833470914	-0.16144280855461246	0.3494908678947503
ENSG00000067606_Q05513	ENSG00000067606	Q05513	1	0.2866623512032835	0.5191555159727846	0.1024917866836764	0.23562477690669545	0.11401333582628362	0.5636341750800191
ENSG00000067704_Q9NSE4	ENSG00000067704	Q9NSE4	1	0.11780685485228005	0.3017531661876009	-0.14999437916482725	0.4550645389131077	0.07195306752495224	0.7532872671538308
ENSG00000067715_P21579	ENSG00000067715	P21579	12	0.7290959620183428	0.8677104864524143	-0.03339336971169901	0.19605613320004606	-0.12421123323927405	0.5195596120128104
ENSG00000067829_P51553	ENSG00000067829	P51553	X	0.9874114794947751	0.9935279101968552	-0.001521758782101772	0.011574791782325908	0.2399481407976643	0.11017550692062372
ENSG00000067900_Q13464	ENSG00000067900	Q13464	18	0.03994830243944689	0.14842961639524693	-0.19620145792822224	0.6346409004852046	-0.045808509828836386	0.8542781274444675
ENSG00000067955_Q13951	ENSG00000067955	Q13951	16	0.06926030451448502	0.21340662893933007	-0.17388156136648353	0.4310365664051121	0.07583557248293313	0.7343670862742415
ENSG00000067992_Q15120	ENSG00000067992	Q15120	X	5.633196153322898e-18	2.5490212593786114e-15	0.7074725733513803	6.563746686554485e-11	0.5722043567537054	3.003382948147717e-08
ENSG00000068024_P56524	ENSG00000068024	P56524	2	0.05044218650288842	0.173480592560151	-0.1870032748895557	0.5486545357634636	0.057798967616605884	0.8083770539370949
ENSG00000068097_Q6AI08	ENSG00000068097	Q6AI08	17	0.09965833824008846	0.2703792602787839	-0.15780617669340785	0.2805506489793224	-0.10379405037660017	0.6092228669022167
ENSG00000068120_Q13057-2	ENSG00000068120	Q13057-2	17	0.4602413324777034	0.6820184423967839	0.07113171673379466	0.049461768955355215	0.18779144996082914	0.25376668422179677
ENSG00000068323_P19532	ENSG00000068323	P19532	X	1.9880201684788672e-11	2.9985970874556247e-09	0.5847060228022236	0.0012541685170204874	0.3037791637632885	0.02608507636374429
ENSG00000068366_O60488-2	ENSG00000068366	O60488-2	X	5.650243519028524e-06	0.00020932334908213863	0.4176085271535448	4.758368898425247e-07	0.4583908198785821	5.4432341363057386e-05
ENSG00000068394_Q92917	ENSG00000068394	Q92917	X	0.005055576228401058	0.03622972331099627	0.2655180651302381	0.1878565942201248	0.12650592726970608	0.5096732243386441
ENSG00000068400_Q4V328	ENSG00000068400	Q4V328	X	7.388970614081575e-10	8.510750698219413e-08	0.545137368432717	0.0175473363485199	0.2260928301083538	0.1430130237259777
ENSG00000068438_Q9UET6-2	ENSG00000068438	Q9UET6-2	X	0.7798372797009054	0.8940483397271208	0.026955324760535887	0.5396521000542113	-0.05910360860673103	0.80193058309459
ENSG00000068489_Q96HE9	ENSG00000068489	Q96HE9	17	0.0005573486807882308	0.00707515604366838	-0.3238764939077396	0.9755480011514004	0.002956206529519179	0.993410445516232
ENSG00000068650_E9PEJ6	ENSG00000068650	E9PEJ6	13	0.014097305299426844	0.07386801412065265	-0.2334763001769921	0.4769679428076811	-0.0685119950990798	0.7655867305502394
ENSG00000068654_O95602	ENSG00000068654	O95602	2	0.1735991182664159	0.38305679909005746	-0.13067619490957658	0.09318897197687692	-0.16086169042158316	0.35136465831893676
ENSG00000068697_Q15012	ENSG00000068697	Q15012	2	0.5606342359878567	0.7545089175657012	-0.0560788888093326	0.24829394499976604	-0.1110050465469046	0.5771302654820396
ENSG00000068784_Q8N5C6	ENSG00000068784	Q8N5C6	2	0.7823523476939249	0.8947353922757605	-0.026639505814000836	0.7171910642612027	-0.034924302794308706	0.8966287973569993
ENSG00000068793_Q7L576	ENSG00000068793	Q7L576	15	0.012144014499040637	0.06632097573398485	-0.23838715040236616	0.08398217982726801	-0.16551387867460374	0.3360336314637594
ENSG00000068796_O00139-1	ENSG00000068796	O00139-1	5	0.08153541436907233	0.23814054865286916	-0.1668183099743926	0.9725065185908782	0.003324052422804164	0.9926508537433343
ENSG00000068831_Q7LDG7	ENSG00000068831	Q7LDG7	11	0.12983553765040495	0.32029132827699197	0.14531805591635485	0.5965089188482517	0.05102895512560656	0.8348778969066857
ENSG00000068878_Q14997	ENSG00000068878	Q14997	2	0.1673892752132913	0.3741746854185605	-0.1325715889258313	0.2916465874041012	-0.10144338515818196	0.6206937006347748
ENSG00000068885_Q9P2H3-3	ENSG00000068885	Q9P2H3-3	3	0.7193579183885517	0.8611361324624858	-0.0346450158079777	0.112206711619913	-0.15229836383845555	0.39107518750661735
ENSG00000068912_Q96DZ1	ENSG00000068912	Q96DZ1	2	0.4776553790041081	0.6964204432660587	0.06840540582308456	0.873618368104942	0.015340518279553655	0.9594375563312633
ENSG00000068976_P11217	ENSG00000068976	P11217	11	0.04352386303180583	0.15639459574956888	0.1928626821377068	0.14766902525305536	0.13896037677584006	0.45473341720792826
ENSG00000069248_Q8WUM0	ENSG00000069248	Q8WUM0	1	0.003424694323871253	0.027085441375436187	-0.27674883585837345	0.07370215837848318	-0.17121712392733798	0.3123925815204135
ENSG00000069275_Q9H1E3	ENSG00000069275	Q9H1E3	1	0.01813589474354024	0.08865242295039952	-0.2249612488697824	0.819476148880556	0.022008588452081475	0.9409507456047395
ENSG00000069329_Q96QK1	ENSG00000069329	Q96QK1	16	0.9060714015877279	0.9579233790409559	-0.011380044599789774	0.039496598094821526	0.19664083730556828	0.22631056117658918
ENSG00000069345_O60884	ENSG00000069345	O60884	16	0.06326661851965337	0.20201311911391337	-0.17770562675504514	0.3809865111755397	-0.08434549763460067	0.6967169827549264
ENSG00000069849_P54709	ENSG00000069849	P54709	3	0.22427064182511103	0.4462784492810111	0.11680680593198126	0.8888935849119203	0.013473599644353221	0.966323353385164
ENSG00000069869_P46934-4	ENSG00000069869	P46934-4	15	0.0012649754561923586	0.012988038111796746	0.30355889500447625	0.0054641929843376675	0.2632203131824101	0.06863727455141491
ENSG00000069956_Q16659	ENSG00000069956	Q16659	15	0.04747251499073775	0.16633760092163918	-0.18943121565829646	0.15306285560857613	0.13715243470377775	0.46136263660684523
ENSG00000069974_P51159	ENSG00000069974	P51159	15	0.1704221642512428	0.3782846568085575	0.13163950418632395	0.5912984029873509	0.0517535681785006	0.8313203710831278
ENSG00000069998_Q9BXW7-2	ENSG00000069998	Q9BXW7-2	22	0.9895222634745632	0.9945460160417828	-0.0012665814975906173	0.3802082857113604	-0.08448292204780658	0.6959084241672969
ENSG00000070010_Q92890	ENSG00000070010	Q92890	22	0.6346658119055351	0.80881269732882	0.04580514394101478	0.023122239749604256	0.2164685755267388	0.16460565990804055
ENSG00000070047_E9PJ24	ENSG00000070047	E9PJ24	11	0.30001003094956497	0.5317749149595674	0.09971052483300503	0.9557486586383106	0.005351795492334173	0.9880231098369457
ENSG00000070061_O95163	ENSG00000070061	O95163	9	0.05138624713195813	0.1752055304526129	-0.1862562006842561	0.5429341102725924	0.05862674893294492	0.8046242938964996
ENSG00000070087_G5E9Q6	ENSG00000070087	G5E9Q6	3	0.006711015593512345	0.04360439362553919	-0.2570480040631743	0.2645190160371461	-0.10730313520296414	0.5947375440868392
ENSG00000070214_Q8WWI5-3	ENSG00000070214	Q8WWI5-3	9	0.16024265170571525	0.3652898789374738	0.13481853199349708	0.959030271637216	0.0049545561367805024	0.9891399001944945
ENSG00000070366_Q86US8	ENSG00000070366	Q86US8	17	0.34971806392223137	0.5816392583216948	0.0900088152999665	0.4877201494413149	0.06685416650252042	0.7724156730463558
ENSG00000070367_O00471	ENSG00000070367	O00471	14	0.09676542834043923	0.2654867858539119	-0.1591525623554208	0.08900425106528077	0.16292870997288048	0.34636844401541855
ENSG00000070371_P53675	ENSG00000070371	P53675	22	0.9929410316434318	0.9958537456156206	-0.0008532969223858798	0.6764584382440678	0.0402315344686571	0.8748863706140323
ENSG00000070423_Q9BV68-2	ENSG00000070423	Q9BV68-2	19	0.09875412666113118	0.26896276543347636	0.15822366051424153	0.08581786265427539	0.1645550096813956	0.339419460314785
ENSG00000070476_Q2QGD7	ENSG00000070476	Q2QGD7	3	0.11428543213245056	0.2964846515373981	-0.1514329498225151	0.4189064002965622	-0.07784247947079412	0.727042644351064
ENSG00000070495_B2WTI3	ENSG00000070495	B2WTI3	17	0.30466883482667384	0.5368941796994624	0.09875900479250167	0.2959094155326561	-0.10055611000917317	0.6245784895888616
ENSG00000070501_P06746	ENSG00000070501	P06746	8	0.0043723007673565385	0.032701485616253516	-0.2697591871674605	0.8901555152481213	-0.013319599865154394	0.9668217185124266
ENSG00000070610_Q9HCG7	ENSG00000070610	Q9HCG7	9	0.11063184966896228	0.2902750679473375	-0.15296234835759642	0.4165755420556468	0.07823194646331387	0.7251659272018391
ENSG00000070669_P08243	ENSG00000070669	P08243	7	0.3705459010100684	0.6017452660596727	0.08620360423165763	0.8845239461835941	0.014007113250499944	0.964900792546731
ENSG00000070718_P53677	ENSG00000070718	P53677	8	0.0034123750593264084	0.027021745001040993	0.27685063071761257	0.003254082809670997	0.2781888376838193	0.04960225131788768
ENSG00000070756_H0YAR2	ENSG00000070756	H0YAR2	8	0.7528492791465994	0.8799446832829718	0.030362995899564524	0.4044120654427777	0.08028530573646811	0.7158057309811612
ENSG00000070756_P11940	ENSG00000070756	P11940	8	0.7528492791465994	0.8799446832829718	0.030362995899564524	0.2185201040320135	0.11825973166209212	0.5480970189620511
ENSG00000070770_P19784	ENSG00000070770	P19784	16	0.020343022923451387	0.09567412785453938	0.22098186778546086	0.0010275476492532447	0.30884864490020986	0.022313458444461986
ENSG00000070785_Q9NR50	ENSG00000070785	Q9NR50	1	0.08904000228956356	0.2517636120309565	0.16291072741655593	0.3592043244158753	0.08825876415925586	0.6783793933396514
ENSG00000070814_Q13428-3	ENSG00000070814	Q13428-3	5	0.2889523676333322	0.520891033286332	0.10200860527594477	0.6692223862276182	-0.041186600851486566	0.8715264497202933
ENSG00000070831_P60953	ENSG00000070831	P60953	1	0.960191457656295	0.982245965478279	0.004814014724328608	0.8937154566131097	-0.012885341254274594	0.967884882908856
ENSG00000070882_Q9H4L5	ENSG00000070882	Q9H4L5	7	0.03773070328625986	0.14278614415678387	-0.198399981921216	0.14991508906744352	-0.13820158940957675	0.4565767393889248
ENSG00000070950_Q9NS91	ENSG00000070950	Q9NS91	3	0.17887172211427266	0.3904422662662071	-0.12910571168685273	0.2993864309000268	-0.09983862425071884	0.6274413447699533
ENSG00000070961_P20020-6	ENSG00000070961	P20020-6	12	0.6447259242208445	0.8129655115324542	-0.04445032143461835	0.7540244206940268	0.03021386440536925	0.9089726080101497
ENSG00000071051_O43639	ENSG00000071051	O43639	2	0.015971854502991396	0.08043060276347416	-0.229291993655472	0.057471455336198976	-0.18169492059860287	0.2743433291066198
ENSG00000071082_P62899	ENSG00000071082	P62899	2	0.5195562016488464	0.7256147569324166	-0.06205548663659676	0.7915123546712872	-0.02549162893662357	0.9280136702829435
ENSG00000071127_O75083	ENSG00000071127	O75083	4	1.0046816773621463e-05	0.00033149262635881233	0.4073101850510093	0.0007709554743655692	0.3160032433144942	0.017772328324572876
ENSG00000071243_E7ET07	ENSG00000071243	E7ET07	7	0.6340719475054624	0.8086088664416772	-0.04588539850187175	0.977616745457038	0.0027060310242434317	0.9938289618265898
ENSG00000071282_Q9NZU5	ENSG00000071282	Q9NZU5	3	0.013054778575132923	0.06990872550588932	0.2360177064624353	0.10178795474114408	0.15683455156310097	0.37069564415677597
ENSG00000071462_O43709	ENSG00000071462	O43709	7	0.5569144166747529	0.7516090391211249	-0.05661107932103165	0.3897808894727753	-0.08280416586371589	0.7044945007255632
ENSG00000071537_Q9UBV2	ENSG00000071537	Q9UBV2	14	0.23169994851778725	0.45570294127916244	-0.11496807751857414	0.03777437803401408	-0.1983556497630837	0.21904564636395613
ENSG00000071539_Q15645	ENSG00000071539	Q15645	5	0.017714374367047432	0.08712776522922785	-0.2257683850319722	0.3433513952368155	-0.09120006049659003	0.6617945982730264
ENSG00000071553_Q15904	ENSG00000071553	Q15904	X	0.9552776139618809	0.9801884814461477	0.005408822657190138	0.6421448628594358	0.04479708379306528	0.8575317889259008
ENSG00000071564_P15923	ENSG00000071564	P15923	19	0.5578048143600334	0.7520158120929272	-0.05648353639326325	0.00022396201082811783	0.34493683661150143	0.007357439186486784
ENSG00000071626_K7EQ55	ENSG00000071626	K7EQ55	19	0.9190469783842644	0.9636117747544757	0.009802190578544322	0.6808249088177616	0.0396571013592359	0.8771851097921521
ENSG00000071655_O95983	ENSG00000071655	O95983	19	0.054956877025102206	0.1842934495372806	0.18352919015457175	0.3208202767383563	-0.09553185671848703	0.6436500760369278
ENSG00000071794_A0A0C4DGA6	ENSG00000071794	A0A0C4DGA6	3	0.0008339961132625773	0.00946839673390399	-0.3140634224926226	0.06521243992588824	-0.17643303742979607	0.29384623884090516
ENSG00000071859_Q14320	ENSG00000071859	Q14320	X	0.014796267928402015	0.07634282531858844	0.23186254595831216	0.5652325876871326	0.055423331704017774	0.820689020109649
ENSG00000071894_Q10570	ENSG00000071894	Q10570	8	0.06044524212378472	0.19616834469988537	-0.17960873055285406	0.7813852421172942	0.026760912443580916	0.9238056383443222
ENSG00000071994_Q16342	ENSG00000071994	Q16342	6	0.4613377920219585	0.6827987974712795	-0.07095840846565711	0.8465846460510057	-0.01865894732343708	0.9497058524272853
ENSG00000072042_Q8TC12	ENSG00000072042	Q8TC12	14	0.006129744837565493	0.041222859390634185	-0.2597861948395881	0.2958999655108135	-0.10055806758545142	0.6245784895888616
ENSG00000072062_P17612	ENSG00000072062	P17612	19	0.0015973970592725168	0.01535585792183823	0.2975027967106198	0.29431629382583085	0.10088671081332226	0.6236818320371394
ENSG00000072071_O94910	ENSG00000072071	O94910	19	0.31860934065345164	0.5524315433015994	0.0959672962430368	0.6048974869021873	-0.049868311036583714	0.8397518906557973
ENSG00000072110_P12814	ENSG00000072110	P12814	14	0.12878310247171326	0.3191866017833738	0.1457135837779615	0.25835942016517394	0.1086897062936392	0.5870649038252526
ENSG00000072110_P12814-3	ENSG00000072110	P12814-3	14	0.12878310247171326	0.3191866017833738	0.1457135837779615	0.4853216130985696	0.0672222759002873	0.7717367320472851
ENSG00000072121_Q68DK2	ENSG00000072121	Q68DK2	14	0.016042224082171715	0.08072080187494664	-0.22914339000530265	0.18605811558299198	-0.12701893685043406	0.5087017876332252
ENSG00000072134_O95208-2	ENSG00000072134	O95208-2	17	0.6514772795324613	0.8177265745099352	0.043545949506420434	0.32009489640157035	0.0956745050419801	0.6432019781519634
ENSG00000072210_P51648	ENSG00000072210	P51648	17	0.19314070250678267	0.40851028732622857	-0.12501902324868985	0.3840152011049252	-0.08381228107477579	0.6990468177529142
ENSG00000072274_P02786	ENSG00000072274	P02786	3	0.3068821982782349	0.5392322883943418	0.09831028239287934	0.6005055336357896	-0.05047508164710512	0.836632981398623
ENSG00000072364_Q9UHB7	ENSG00000072364	Q9UHB7	5	0.616376351810869	0.794939777834254	-0.048291540547092164	0.034948743127366365	-0.20131683758645189	0.20983407426123388
ENSG00000072415_Q8N3R9	ENSG00000072415	Q8N3R9	14	3.210308712127344e-05	0.0007975413996598715	-0.3854242170407812	0.25013586153039064	-0.11057659317671556	0.5795191063159791
ENSG00000072501_Q14683	ENSG00000072501	Q14683	X	0.0007433597598002759	0.008688531509842707	0.31689847208411026	0.004462718150590019	0.2691653189441141	0.06029061786881164
ENSG00000072506_Q99714	ENSG00000072506	Q99714	X	0.005671397059213557	0.039223035338556644	0.2621130572334755	0.2030522277391449	0.122307560869511	0.5286621446843964
ENSG00000072518_E9PC69	ENSG00000072518	E9PC69	11	0.9736085978970616	0.9874934383844183	0.003190758461904187	0.017402203523800754	0.2263769024577192	0.14219198440493322
ENSG00000072571_O75330-2	ENSG00000072571	O75330-2	5	0.05114178239486673	0.17465401157492225	-0.1864485612212436	0.7504829190074179	-0.030663517079132944	0.9082927600909728
ENSG00000072682_O15460-2	ENSG00000072682	O15460-2	5	0.0063514230479498855	0.04214343291580956	0.2587158049078567	0.10702108696486982	0.1545129658917808	0.3814094302076402
ENSG00000072756_Q96Q11-2	ENSG00000072756	Q96Q11-2	3	0.8876585774148092	0.9503662477476451	-0.013624346697843856	0.4245949252547368	-0.07689721514636833	0.7314576465278096
ENSG00000072778_P49748-3	ENSG00000072778	P49748-3	17	0.6097691301507481	0.7899565315961123	0.049197542286562784	0.4692417325754496	0.0697157374230247	0.7600410970615247
ENSG00000072786_O94804	ENSG00000072786	O94804	5	0.00832337312237435	0.05064175101513948	0.2504251743300288	0.1459334144517856	0.13955269633092768	0.45232771602391236
ENSG00000072803_Q9UKB1-3	ENSG00000072803	Q9UKB1-3	5	0.6118692517123606	0.7913825458550029	-0.04890910574529777	0.6087507414807031	0.0493375672007643	0.8418025791568711
ENSG00000072818_Q15027	ENSG00000072818	Q15027	17	0.21048596292789912	0.4311117281436278	0.12033573222034205	0.5000865558577066	-0.06497130577816887	0.776619267108962
ENSG00000072832_E9PD68	ENSG00000072832	E9PD68	4	0.7707140531345368	0.8889143910326549	-0.028103359403814775	0.39485226159212733	-0.08192481803519161	0.7083236034049755
ENSG00000072864_Q9NXR1-2	ENSG00000072864	Q9NXR1-2	16	0.04492008838462734	0.16004992121294387	-0.19162081233705	0.34771178768377864	-0.09038272314366563	0.6664996145727965
ENSG00000072958_Q9BXS5	ENSG00000072958	Q9BXS5	19	0.6910530229542616	0.8435107707929186	-0.03831691589080305	0.4769219553622904	0.0685191285636556	0.7655867305502394
ENSG00000073050_P18887	ENSG00000073050	P18887	19	0.28838901379158666	0.5202232906961053	-0.10212723312230956	0.2434065773278417	-0.11215265009822524	0.5717867746102508
ENSG00000073060_Q8WTV0-4	ENSG00000073060	Q8WTV0-4	12	0.4892855502353206	0.7059038853884664	-0.06661443999083527	0.0034037329001473807	-0.2769222384783184	0.05094465644472926
ENSG00000073111_P49736	ENSG00000073111	P49736	3	0.267277586575847	0.5007545151953104	-0.10668927825831226	0.076045028384472	-0.16986359864842265	0.3177719842341341
ENSG00000073169_A0A087X0Q9	ENSG00000073169	A0A087X0Q9	22	0.5412838490125611	0.7413299824812762	0.058866345669250815	0.3144503729765891	0.09679171704976168	0.6384275343689546
ENSG00000073350_J3QRV5	ENSG00000073350	J3QRV5	17	0.3487829127776209	0.5803886925259335	0.09018293089498927	0.4269215259545442	0.07651270936802007	0.7331904336257085
ENSG00000073536_Q9NVX2	ENSG00000073536	Q9NVX2	17	0.6766332289886631	0.8347558920434627	-0.04020851282223845	0.41240943157549176	-0.07893124143168546	0.7217127055777359
ENSG00000073578_P31040	ENSG00000073578	P31040	5	0.014798577662387782	0.07634282531858844	-0.2318573241291052	0.14454532513553364	-0.14003025366469118	0.45058751961957594
ENSG00000073584_B4DGM3	ENSG00000073584	B4DGM3	17	0.2641522893039903	0.49687139494173493	-0.10738506881765184	0.9753457519268784	-0.002980665774510961	0.993410445516232
ENSG00000073614_P29375-2	ENSG00000073614	P29375-2	12	0.11332231023162087	0.2947031343667152	-0.151832383593332	0.35607643122344784	0.08883259299260783	0.6748596504193511
ENSG00000073711_Q06190	ENSG00000073711	Q06190	3	0.7854944925634534	0.8958647328378919	0.026245339579529785	0.05412610449246442	0.18415036053930384	0.2668533693690796
ENSG00000073712_Q96AC1	ENSG00000073712	Q96AC1	14	0.04132326122466947	0.1513238022896942	0.19488911372890996	0.007774725264493066	0.2525405081017325	0.08513656417836339
ENSG00000073792_F8W930	ENSG00000073792	F8W930	3	0.2934579623796705	0.5260487242997206	-0.10106532014963246	0.8794876324400496	0.01462255076997332	0.9629501784681413
ENSG00000073849_P15907	ENSG00000073849	P15907	3	0.21981311008893314	0.4419282933714349	-0.11793070735265805	0.6988450144162628	0.03730082870716228	0.8884304747669338
ENSG00000073921_Q13492-2	ENSG00000073921	Q13492-2	11	0.8329654089844065	0.9225237527825552	-0.020338773808550682	0.09403116657297617	0.16045461443002024	0.3530853769440125
ENSG00000073969_I3L0N3	ENSG00000073969	I3L0N3	17	0.6736095184192945	0.8336230316831864	0.04060708544978876	0.20422376618125568	-0.12199341054096607	0.5290589914011063
ENSG00000074047_P10070	ENSG00000074047	P10070	2	0.4706787712156605	0.6908595958413366	-0.06949103659629348	0.7288593192352841	0.03342371921815565	0.900232497014465
ENSG00000074054_Q7Z460-4	ENSG00000074054	Q7Z460-4	2	0.13140245457593508	0.3221219416821113	-0.1447336964532032	0.5754991609564247	0.0539687248448732	0.8254920790610966
ENSG00000074071_C9JJ19	ENSG00000074071	C9JJ19	16	0.7752522211261743	0.8906824121933831	0.02753181123475185	0.0661889540063405	-0.17580599139379774	0.2967294521172659
ENSG00000074181_Q9UM47	ENSG00000074181	Q9UM47	19	0.36248255632934057	0.5947492862849968	0.08766066822855104	0.17316829297101233	-0.13080606272233558	0.4901004170584816
ENSG00000074201_P54105	ENSG00000074201	P54105	11	0.8509994409686548	0.9335205988807668	0.0181156371530864	0.4933575552823874	0.06599274927281533	0.7742402006709882
ENSG00000074266_O75530	ENSG00000074266	O75530	11	8.628781469543531e-05	0.0016976189630297598	-0.3654894406965129	0.3440820272192969	-0.0910626532199	0.6621175927806596
ENSG00000074317_Q16143	ENSG00000074317	Q16143	5	0.039343220455319086	0.14687053717409923	0.1967909865255772	0.031233517256324807	0.2055337555899521	0.19795491023439724
ENSG00000074319_Q99816	ENSG00000074319	Q99816	11	0.06079236437342812	0.19709295204998317	-0.17937072247672226	0.5856529490757839	-0.052541941932118134	0.8293340486009425
ENSG00000074356_Q53F19	ENSG00000074356	Q53F19	17	0.5723888575504491	0.7617263507244986	0.05440810895350495	0.7037202188923521	0.036667174581330286	0.8923261524593048
ENSG00000074370_Q93084-4	ENSG00000074370	Q93084-4	17	0.06037938556027661	0.19607093800688186	0.17965401180542356	0.4914668040456991	0.06628107924898836	0.773977897358563
ENSG00000074582_Q9Y276	ENSG00000074582	Q9Y276	2	0.6410126232767892	0.8111895662122373	-0.044949379221323686	0.104176931906841	-0.15576340294368754	0.3765537224612609
ENSG00000074603_Q6V1X1-5	ENSG00000074603	Q6V1X1-5	15	0.0066940333049424474	0.04360439362553919	-0.25712496465911394	0.3011743567669422	0.09947181766052604	0.6293371881563652
ENSG00000074657_Q9HCE3	ENSG00000074657	Q9HCE3	18	0.8004974629894647	0.9036264126939164	0.02436912112857758	0.5357245517572907	-0.059676148217123776	0.7996831906033891
ENSG00000074695_P49257	ENSG00000074695	P49257	18	0.5239839745699114	0.7292872941006879	0.061400230104664014	0.5169122521980086	-0.06244811330374207	0.789432811795249
ENSG00000074755_O43149	ENSG00000074755	O43149	17	0.4638751361310806	0.6852184091118755	-0.07055821914989079	0.15406688088711568	0.13682119967068232	0.46292328281560186
ENSG00000074800_P06733	ENSG00000074800	P06733	1	0.7588506103291934	0.8828867982434233	0.029602138894463212	0.6826687863102128	-0.03941494692750426	0.8777892883654838
ENSG00000074800_P06733-2	ENSG00000074800	P06733-2	1	0.7588506103291934	0.8828867982434233	0.029602138894463212	0.9042433710160092	0.011602568459687976	0.9711728455021056
ENSG00000074964_Q9HCE6	ENSG00000074964	Q9HCE6	1	0.492736984758096	0.7086878895678973	0.06608731862796616	0.5745956926296673	0.05409624085497895	0.824820004943781
ENSG00000075089_Q9GZN1	ENSG00000075089	Q9GZN1	12	0.8129165224600372	0.9114736583689089	0.022822921656993008	0.3072113045319517	0.0982437424166348	0.6347935338400178
ENSG00000075142_C9J0K6	ENSG00000075142	C9J0K6	7	0.0335926763567318	0.13292292612110926	0.20281012938470727	0.7167288472424693	0.03498391554566661	0.8964008191009876
ENSG00000075188_Q8NFH4	ENSG00000075188	Q8NFH4	12	0.18459477343541067	0.39797771759429057	-0.1274390230996551	0.5324657998735575	-0.06015277767497566	0.7983331998505963
ENSG00000075218_Q9NYZ3	ENSG00000075218	Q9NYZ3	22	0.00012734095829322763	0.002291775485192037	-0.35727133003036204	0.9233161369540692	-0.009283638475744605	0.9774790855519928
ENSG00000075234_Q5R3I4	ENSG00000075234	Q5R3I4	22	0.0280705934959957	0.11965010500358927	-0.20947270276742774	0.18010433001476794	-0.12874348390689344	0.49881034936212865
ENSG00000075239_P24752	ENSG00000075239	P24752	11	0.7957243546078399	0.9001139563101141	0.024965009544346533	0.8806907785116712	-0.014475473860677471	0.9629501784681413
ENSG00000075240_Q6IC98	ENSG00000075240	Q6IC98	22	0.04201224186602116	0.15260754141126381	-0.19424517766343866	0.6742347344412204	-0.04052461617575693	0.8743213985486756
ENSG00000075275_Q9NYQ6	ENSG00000075275	Q9NYQ6	22	0.5447628273308656	0.7435195298590757	0.05836166011732686	0.6083011501098342	0.049399417160941365	0.8415619345159749
ENSG00000075292_Q14966	ENSG00000075292	Q14966	2	0.9581370865793668	0.9813207230508167	0.005062667728277627	0.8630514354603622	-0.016635279781070034	0.955122524785885
ENSG00000075336_Q9BVV7	ENSG00000075336	Q9BVV7	18	0.7461148786573619	0.8760319185258683	0.031219021185461913	0.07123223927313603	-0.17268214792808054	0.3078184143607587
ENSG00000075340_P35612	ENSG00000075340	P35612	2	0.0011920685785650426	0.01245893094094798	-0.30507943329972764	0.00489300504263659	-0.2664785350739217	0.0639685516390408
ENSG00000075391_Q9UJF2-2	ENSG00000075391	Q9UJF2-2	1	0.2468978757443665	0.47468832863142996	0.11133125290903964	0.39665592230226293	0.0816136996569164	0.7094143241877942
ENSG00000075413_A0A0A0MT23	ENSG00000075413	A0A0A0MT23	14	0.11327693809218704	0.2947031343667152	-0.1518512656234216	0.6771095860894776	0.04014578342360447	0.8750381296125063
ENSG00000075415_Q00325-2	ENSG00000075415	Q00325-2	12	0.12473736069437318	0.31274482987757796	-0.14725753665050564	0.20166066183180867	-0.12268240792012583	0.5264656104920591
ENSG00000075420_Q53EP0	ENSG00000075420	Q53EP0	3	0.11114177561971024	0.2904785962398689	-0.15274655548297006	0.13554960482821302	-0.14321235646901326	0.4367861008699862
ENSG00000075539_O94915	ENSG00000075539	O94915	4	0.01952219972464013	0.09298731974104904	-0.22241623250453174	0.4766818665806426	-0.0685563766038254	0.7655111650327392
ENSG00000075568_Q92545	ENSG00000075568	Q92545	2	0.8023266880906252	0.9050462195609172	0.02414099972752875	0.5202224488434923	0.06195670950425247	0.7910147180848355
ENSG00000075618_Q16658	ENSG00000075618	Q16658	7	0.5149024941959022	0.7226201375124147	-0.06274724896980262	0.326804918005581	-0.09436279827817466	0.6497190102974625
ENSG00000075624_P60709	ENSG00000075624	P60709	7	2.3399173384042368e-08	1.9004328639475437e-06	0.5018094716254445	7.389748505632159e-05	0.3687018309474705	0.0032644464070112106
ENSG00000075643_Q96EN8	ENSG00000075643	Q96EN8	18	0.0067510146200973255	0.04372647099769184	-0.2568674156683008	0.00296536529199092	-0.2807879067458847	0.04702012391211345
ENSG00000075702_O43379	ENSG00000075702	O43379	19	0.7762503890267854	0.8916674912936874	-0.02740622807424997	0.3314310945004165	0.09346847409744652	0.6532761819598979
ENSG00000075711_Q12959-4	ENSG00000075711	Q12959-4	3	0.22837986336169716	0.4514154241486277	-0.11578459063457355	0.2337574843051713	-0.11446617019458474	0.5613642078198197
ENSG00000075785_P51149	ENSG00000075785	P51149	3	0.2865567213989339	0.5191555159727846	0.10251413588558288	0.6136974898045835	-0.04865836206072849	0.8451421147772029
ENSG00000075856_Q15020	ENSG00000075856	Q15020	12	0.5359902417300608	0.738111604252184	-0.05963735170848514	0.2202412179985103	-0.11782207094142433	0.5483924801448716
ENSG00000075914_Q15024	ENSG00000075914	Q15024	3	0.8122108440269891	0.9110049038440112	-0.022910621541923068	0.9713856828873614	-0.003459621349739975	0.9922101376981817
ENSG00000075975_C9J494	ENSG00000075975	C9J494	3	0.34010905362075466	0.5728771216930287	0.09181207030495583	0.002208486998776947	0.2888745510038811	0.03807295685243352
ENSG00000076003_Q14566	ENSG00000076003	Q14566	2	0.6712799506304529	0.8317149398090982	-0.0409146265818385	0.013384284377657426	-0.2351959124467769	0.12076017707503306
ENSG00000076043_F5GYG5	ENSG00000076043	F5GYG5	11	0.005855288012091543	0.04005750492073426	0.2611601167112513	0.1368414406189189	0.14274571265643893	0.43962200030330717
ENSG00000076043_Q9Y3B8	ENSG00000076043	Q9Y3B8	11	0.005855288012091543	0.04005750492073426	0.2611601167112513	0.4622358379272159	0.07081663077170584	0.7570345070272106
ENSG00000076053_Q9Y580	ENSG00000076053	Q9Y580	11	0.2869404868732719	0.5195107128728715	0.1024329648274778	0.7385466129644573	0.032183950036324696	0.9030596683814304
ENSG00000076108_J3KPG5	ENSG00000076108	J3KPG5	12	0.2955676623072982	0.5279390280131632	0.1006269306004194	0.8854021122169534	-0.013899859626906392	0.9649346598948289
ENSG00000076201_Q9H3S7	ENSG00000076201	Q9H3S7	3	0.6300489596386002	0.8056843276767324	-0.04642989426288289	0.19539403801385716	-0.12439391618738015	0.5185145847211139
ENSG00000076242_P40692	ENSG00000076242	P40692	3	0.0005790377988383607	0.00724941592023916	-0.322960987722438	0.005445644374985539	-0.26332124642693683	0.06863727455141491
ENSG00000076248_P13051	ENSG00000076248	P13051	12	0.4412545188233957	0.6666700159184861	-0.0741699804430477	0.18243913087500235	-0.12806230049754827	0.5029556647258538
ENSG00000076382_Q96R06	ENSG00000076382	Q96R06	17	1.9903084590253736e-05	0.0005705250718518436	-0.3946188379842037	0.9151166391070548	0.010279834911043374	0.9750284433640587
ENSG00000076604_Q9BUZ4	ENSG00000076604	Q9BUZ4	17	0.015407270600578884	0.07835344798506012	-0.23050525720578466	0.2894584490637084	-0.10190216848677806	0.6178843134628843
ENSG00000076650_Q9BRR8	ENSG00000076650	Q9BRR8	19	0.4497054446026644	0.6726998799428285	-0.07280882690566162	0.3788914302381384	0.08471585029314918	0.6954666195144741
ENSG00000076685_P49902-2	ENSG00000076685	P49902-2	10	0.6970805151904048	0.8475310095562208	0.03753056024961564	0.22338814218654807	0.11702805510145475	0.5517397947374486
ENSG00000076706_P43121	ENSG00000076706	P43121	11	1.3516952084523725e-09	1.5022787974641718e-07	0.5379905900425483	0.000405320703535604	0.3314054897857564	0.011488869145349906
ENSG00000076716_O75487	ENSG00000076716	O75487	X	3.712277076467432e-17	1.3713312843605816e-14	0.6949343836462742	1.8128284143739352e-07	0.4729644431648458	2.3699956780570263e-05
ENSG00000076826_Q9P1Y5-2	ENSG00000076826	Q9P1Y5-2	19	0.5449346767380723	0.7435195298590757	-0.05833677145447664	0.6411655814522405	0.04492879864119051	0.8573747070311635
ENSG00000076924_Q9HCS7	ENSG00000076924	Q9HCS7	19	0.19226978709660936	0.4073675923936523	-0.1252620425416963	0.4810283663350388	-0.06788360646511629	0.7684458141501892
ENSG00000076928_Q92888-3	ENSG00000076928	Q92888-3	19	0.06440560572194125	0.20457094623326133	-0.1769569142050396	0.2538973448839761	-0.10970832360845263	0.5830858427902454
ENSG00000076944_Q15833-2	ENSG00000076944	Q15833-2	19	0.002698925064242096	0.022467716649193854	0.2833969591270513	0.07063689538883278	0.17304140036098645	0.30636421926937224
ENSG00000076984_O14733	ENSG00000076984	O14733	19	0.6603569256573872	0.8245058239201507	0.042362201896596736	0.5066068782083234	-0.06398837682715404	0.7815550767582625
ENSG00000077063_Q8WZ74	ENSG00000077063	Q8WZ74	7	6.463588624295002e-05	0.0013458374399049247	-0.3714499654846242	0.3953608629779096	-0.08183700242646301	0.7085056899989114
ENSG00000077097_Q02880-2	ENSG00000077097	Q02880-2	3	0.09620331931921383	0.26463223095406846	-0.15941784420223146	0.05645478664813373	-0.18242844288316612	0.2729769988017639
ENSG00000077147_Q9HD45	ENSG00000077147	Q9HD45	10	0.27667225343894336	0.5096781791133393	-0.10463032307570086	0.05020601929567672	-0.18719196833490265	0.25547954327772116
ENSG00000077150_Q00653-4	ENSG00000077150	Q00653-4	10	0.0054953360090337295	0.03817209826450513	0.26305153054516234	9.273675207696272e-05	0.36398412235671507	0.003759947049398881
ENSG00000077152_Q9NPD8	ENSG00000077152	Q9NPD8	1	0.39100663828206894	0.6231514600042533	-0.08259100351398234	0.9316610159954479	-0.00827078018603363	0.9793262924038708
ENSG00000077232_Q8IXB1	ENSG00000077232	Q8IXB1	2	0.5386606035615153	0.7394181849538894	-0.05924794918925015	0.07565625446366839	-0.17008585647219626	0.3170555422177821
ENSG00000077235_Q12789	ENSG00000077235	Q12789	16	0.8976338325506994	0.9549939348608167	-0.01240765639078972	0.05896813183866621	-0.1806341961478975	0.2781663126351221
ENSG00000077254_Q8TEY7-3	ENSG00000077254	Q8TEY7-3	1	5.32009807912922e-05	0.001162166252802883	-0.37540198580247497	0.5682998157892436	-0.054987462605232115	0.8216526647905034
ENSG00000077274_Q9Y6Q1	ENSG00000077274	Q9Y6Q1	X	7.306292511638072e-12	1.1571340765306795e-09	0.5947886331023322	3.3180782844026187e-08	0.497072934280169	5.184294997532481e-06
ENSG00000077312_P09012	ENSG00000077312	P09012	19	0.4133990350517445	0.6440647269872981	-0.07876476149399135	0.2578759738081812	-0.10879948445468324	0.5864229635126762
ENSG00000077348_Q9NQT4	ENSG00000077348	Q9NQT4	19	0.6374143948761739	0.8098716790093384	0.04543410846749321	0.5419278912019071	0.058772796325570364	0.804104088134956
ENSG00000077380_Q13409-2	ENSG00000077380	Q13409-2	2	0.8792485301514424	0.9467980967974183	0.014651783479169981	0.6521741787869065	-0.04345281331846397	0.8624747707078702
ENSG00000077454_O75427	ENSG00000077454	O75427	7	0.0016213510875274595	0.01551549718955658	0.2971120540927525	0.6157806314807336	0.04837305377154007	0.8468536136996325
ENSG00000077458_F5GX09	ENSG00000077458	F5GX09	11	0.24974642592592766	0.4791470648821174	-0.11066699918067707	0.5467003503117016	-0.0580812739755746	0.8076942906127215
ENSG00000077463_Q8N6T7	ENSG00000077463	Q8N6T7	19	0.3114422258436224	0.5436494940249879	0.0973924281534306	0.8196802557948817	-0.021983275070078613	0.9410164370290344
ENSG00000077514_Q15054	ENSG00000077514	Q15054	11	0.3192072408533696	0.5524315433015994	-0.09584934917606952	0.5380733038625077	-0.0593335093486932	0.8016040894286568
ENSG00000077549_P47756-2	ENSG00000077549	P47756-2	1	0.37122769024328695	0.6023891951053337	-0.08608129956132234	0.8276350869826247	0.020997860202764937	0.9427487750696827
ENSG00000077684_Q6IE81-2	ENSG00000077684	Q6IE81-2	4	0.050084139502776105	0.17253019236002534	0.187289635268808	0.08490227719762856	-0.1650311990493057	0.33776192734096777
ENSG00000077721_A0A0D9SG71	ENSG00000077721	A0A0D9SG71	X	2.9941904441556475e-06	0.0001253836682372242	0.4285907836261253	0.008570349916496781	0.24951286634602785	0.09089679067065957
ENSG00000077782_P11362-21	ENSG00000077782	P11362-21	8	0.3594677638182838	0.5918845880396811	0.08821057652613179	0.02153438081409191	0.21898611908579346	0.16023139223560018
ENSG00000077809_P78347-4	ENSG00000077809	P78347-4	7	0.6189188426838446	0.7972449915417151	-0.04794403008542979	0.6733378243786755	-0.04064293245796942	0.8737737268874448
ENSG00000077942_P23142-4	ENSG00000077942	P23142-4	22	0.959478102045754	0.9820776373718471	-0.004900352826191355	0.9262141338339293	-0.008931785761083551	0.9779450208209611
ENSG00000078018_P11137-3	ENSG00000078018	P11137-3	2	2.8336040257351033e-05	0.0007356918648783558	-0.3878512827520205	0.0014073624880059186	-0.3008062689457257	0.028235306674292176
ENSG00000078043_O75928	ENSG00000078043	O75928	18	0.00817970490761233	0.05006611651181074	-0.25096691442723124	0.11029334632812708	-0.1531060258752846	0.3870103065596681
ENSG00000078053_P49418-2	ENSG00000078053	P49418-2	7	5.6861058969887326e-05	0.0012294020770451748	-0.3740571615875458	0.003608893281565378	-0.27526471484461185	0.05290290700619636
ENSG00000078061_P10398	ENSG00000078061	P10398	X	0.25872082681289377	0.4902771276876105	0.10860773188170476	0.7445888189369583	-0.03141333759057744	0.9048443691993574
ENSG00000078070_Q96RQ3	ENSG00000078070	Q96RQ3	3	0.4216267076290592	0.6503239068897403	-0.07738952503941174	0.42721456999509744	-0.07646436497058427	0.7331904336257085
ENSG00000078140_P61086	ENSG00000078140	P61086	4	0.05325077267600757	0.17962920388844938	-0.18481339453182405	0.9471795663666264	-0.006389523510388397	0.9846039959174777
ENSG00000078142_Q8NEB9	ENSG00000078142	Q8NEB9	18	0.4427726252634112	0.6676897360256391	0.07392439189845164	0.015209442228225444	0.2309395181540437	0.1293913504834159
ENSG00000078177_Q86UW6	ENSG00000078177	Q86UW6	4	0.014621842147589654	0.07573946852410504	-0.2322589481853179	0.8749839415258908	0.015173398825758662	0.960443305245863
ENSG00000078269_O15056	ENSG00000078269	O15056	6	0.2961676271644422	0.5282350972968102	-0.10050263731171913	0.906076318295019	-0.011379446176272531	0.9715977393702531
ENSG00000078304_H0YJ75	ENSG00000078304	H0YJ75	14	0.0036556219757836045	0.028590574341468066	0.2748990339475965	0.3968665815425129	0.08157741744689377	0.7094143241877942
ENSG00000078369_P62873	ENSG00000078369	P62873	1	0.271218969628507	0.5054934311846401	-0.10581961965850943	0.8074988952483706	-0.023496693283645	0.9355975029637118
ENSG00000078403_P55197-1	ENSG00000078403	P55197-1	10	0.6269771706443468	0.803540436178826	-0.046846634813721234	0.4753649991191815	-0.06876085957892039	0.7649304658019282
ENSG00000078618_B1AKJ5	ENSG00000078618	B1AKJ5	1	0.028879850793241745	0.12097710181153694	-0.2084303929293524	0.4848312740904516	-0.06729764884264709	0.7714429065631976
ENSG00000078668_Q9Y277	ENSG00000078668	Q9Y277	8	0.1402811394085642	0.33560461410621384	0.14151933227220131	0.349250778067196	-0.09009578266832488	0.667998810224493
ENSG00000078674_E7ETA6	ENSG00000078674	E7ETA6	8	0.03127119330452457	0.1269891087077969	-0.2054889129180823	0.0012925908942639222	-0.30300371892345546	0.02653954252773938
ENSG00000078747_Q96J02-2	ENSG00000078747	Q96J02-2	20	0.2893974807272087	0.5212775207298457	-0.10191498452365516	0.39083719874244705	0.08262044582093497	0.7048904003469444
ENSG00000078808_Q9BRK5	ENSG00000078808	Q9BRK5	1	0.0001892369534822699	0.0030817894609516195	0.3486706306711853	0.18349402994915132	-0.12775662124526055	0.5044904531563361
ENSG00000078902_Q9H0E2	ENSG00000078902	Q9H0E2	11	0.0773529987198337	0.23038610573114549	0.1691224925350037	0.4685079918745716	-0.06983061259026893	0.7596209050742865
ENSG00000079134_A0A087WWS1	ENSG00000079134	A0A087WWS1	18	0.7953094212268592	0.9001139563101141	-0.02501685513172379	0.004855440983175827	-0.2667045059558055	0.06384309585476858
ENSG00000079150_Q9Y680-3	ENSG00000079150	Q9Y680-3	2	0.006212677990100937	0.041603927132441265	-0.25938178297493464	0.16859818843156102	-0.13219857307377542	0.4836721876814062
ENSG00000079246_P13010	ENSG00000079246	P13010	2	0.00013059369562868007	0.002343657398888635	-0.3567309476229472	0.9979591956827568	-0.0002466920698869709	0.998764956067151
ENSG00000079257_Q9BS40	ENSG00000079257	Q9BS40	3	0.5164632565195443	0.7234838662779259	-0.06251489088729068	0.057037166352851575	-0.18200694543117235	0.2742830778385765
ENSG00000079277_Q9BUB5-2	ENSG00000079277	Q9BUB5-2	1	0.06783572290378106	0.2105472231186002	-0.17476537379841975	0.8062687439022599	-0.02364983953136376	0.9352440991180169
ENSG00000079313_Q8N1G1	ENSG00000079313	Q8N1G1	19	0.3402631995094077	0.5729310625888757	-0.0917828912361788	0.4560588734699874	0.07179490628202218	0.754133490823113
ENSG00000079332_Q9NR31	ENSG00000079332	Q9NR31	10	0.7241415563803618	0.8635987875884021	-0.03402946042960416	0.00547465348197201	-0.2631635262306989	0.06863727455141491
ENSG00000079387_Q9P0U3-2	ENSG00000079387	Q9P0U3-2	12	0.7299281000947119	0.8681250596888304	-0.0332866736508538	0.20534856502892315	0.12169300768031405	0.5304285917642265
ENSG00000079432_I3L2J0	ENSG00000079432	I3L2J0	19	0.06494459538801617	0.20489243614695338	0.17660636109876526	0.4529779387129777	0.07228559248787253	0.7517556153873924
ENSG00000079459_P37268	ENSG00000079459	P37268	8	0.4003416675800092	0.6324805224371066	-0.08098054130641802	0.005943194870452433	-0.2607139401236811	0.0725182977907015
ENSG00000079462_Q15102	ENSG00000079462	Q15102	19	0.2670620030028715	0.5006918582489466	0.1067370961714543	0.5724385263755158	0.054401083616405534	0.8238690631232429
ENSG00000079616_Q14807	ENSG00000079616	Q14807	16	0.03415212511982739	0.13429777320552855	-0.2021880212933305	0.02010251051026689	-0.22139691799471986	0.15422357165122116
ENSG00000079691_Q5VZK9	ENSG00000079691	Q5VZK9	6	0.05784635524348719	0.19036709634674875	-0.18142711607562367	0.1085075895252786	-0.15386972882100367	0.3837616484679334
ENSG00000079739_P36871	ENSG00000079739	P36871	1	0.23613137164855064	0.46045476265798063	0.11389091448058837	0.023703583288346614	0.21558382210965654	0.1668628071924708
ENSG00000079785_Q92499	ENSG00000079785	Q92499	2	0.5674491308165717	0.7577551103969185	0.05510823773166164	0.1484506959954104	0.13869532536196238	0.4551029595635337
ENSG00000079805_P50570-4	ENSG00000079805	P50570-4	19	0.5461285509477447	0.7439970247632892	0.05816397057656893	0.26448347403711364	0.10731107257034722	0.5947375440868392
ENSG00000079819_E9PHY5	ENSG00000079819	E9PHY5	6	0.005996324784109915	0.04054078709427568	-0.26044711104051416	0.1171555467352008	-0.15025791676459135	0.39980885384310366
ENSG00000079819_O43491	ENSG00000079819	O43491	6	0.005996324784109915	0.04054078709427568	-0.26044711104051416	0.024850724309857818	-0.21389108415404226	0.17191548588439437
ENSG00000079950_O15400-2	ENSG00000079950	O15400-2	6	0.3353810707216018	0.567994652907149	0.09271115100488264	0.7851228422939449	0.02629193855821094	0.9253806429365166
ENSG00000079999_Q14145	ENSG00000079999	Q14145	19	0.9260551442405168	0.9676358005941816	-0.00895108598607218	0.5850869715011531	-0.05262117022002294	0.8292183936806166
ENSG00000080200_Q68DQ2	ENSG00000080200	Q68DQ2	3	0.26837304550403	0.5022579743775569	-0.10644670103266583	0.2856249032129265	-0.10271152852888887	0.6151829783047427
ENSG00000080298_P48380-2	ENSG00000080298	P48380-2	9	0.0036699878678964674	0.02859701493619203	-0.2747874541677136	0.06028104239444944	-0.17972170520266242	0.28186887414514095
ENSG00000080345_Q5UIP0	ENSG00000080345	Q5UIP0	2	0.9277671465923848	0.9682821497184054	-0.008743279300181421	0.8220202879559471	0.021693170055172455	0.9417436569836987
ENSG00000080371_Q9UL25	ENSG00000080371	Q9UL25	12	0.9325703596617326	0.9698813747007018	-0.008160465054678856	0.8142222033828083	-0.02266070403847276	0.9381219080702589
ENSG00000080546_Q9Y6P5-2	ENSG00000080546	Q9Y6P5-2	6	0.2822600871682912	0.5145662308521223	-0.10342791467958633	0.07274372122744333	0.17178084293081286	0.3105881652226889
ENSG00000080603_Q6ZRS2-2	ENSG00000080603	Q6ZRS2-2	16	0.11749336704502775	0.30146960137859	-0.1501210840260205	0.8852596007601272	-0.013917263915695366	0.9649346598948289
ENSG00000080608_Q15397	ENSG00000080608	Q15397	9	0.365179081186899	0.5973171906323277	0.08717120118437076	0.4798179609116183	-0.06807062840355715	0.7674691279899692
ENSG00000080709_Q9H2S1	ENSG00000080709	Q9H2S1	5	0.7346297198973485	0.8698692996206144	0.03268458635234504	0.3729789012242787	0.08576778196343618	0.6913619830760221
ENSG00000080802_O95628-8	ENSG00000080802	O95628-8	7	0.5096903860598336	0.7189687365150403	-0.0635258305542909	0.13432037990856474	-0.1436595390728161	0.43413539540578494
ENSG00000080819_P36551	ENSG00000080819	P36551	3	0.22509758145796088	0.4468797174980201	-0.11660004227277247	0.003967037165669368	-0.2725638128505781	0.056442610242228956
ENSG00000080824_P07900-2	ENSG00000080824	P07900-2	14	0.42239455543008975	0.6509047698004423	-0.07726197806706439	0.3162752180124085	-0.09642911959552967	0.6401450384162681
ENSG00000080845_Q9Y2H0	ENSG00000080845	Q9Y2H0	20	0.386826740925419	0.6188251019602348	0.08331956174616913	0.41327872551352896	0.07878498860070085	0.722252316057423
ENSG00000080986_O14777	ENSG00000080986	O14777	18	0.00022476085444558648	0.0034728292997872937	-0.3448574237581251	0.39048864357333335	0.08268103582932633	0.7048904003469444
ENSG00000081014_Q9UPM8	ENSG00000081014	Q9UPM8	15	0.2863901440864948	0.5191555159727846	-0.10254939153903453	0.09952966629688216	0.1578654035122276	0.3655889004001302
ENSG00000081019_A0A0C4DGT8	ENSG00000081019	A0A0C4DGT8	1	0.014336176863690804	0.07468723719694181	-0.23291712298880096	0.2861383167984254	-0.10260271606777506	0.6151829783047427
ENSG00000081087_Q86WC4	ENSG00000081087	Q86WC4	6	0.012898660970977766	0.06942482349290072	-0.2364133990056257	0.23023500037506106	-0.11532733610855675	0.5594789446385718
ENSG00000081154_Q8WW12	ENSG00000081154	Q8WW12	3	0.4369713593518648	0.6626149260937789	0.07486546653611241	0.9258936923112616	0.0089706854831414	0.9779450208209611
ENSG00000081177_Q9NVH0	ENSG00000081177	Q9NVH0	14	0.4747847514876887	0.6944727316265316	0.06885105756598386	0.7174902779031644	-0.03488571983133859	0.8966528911915083
ENSG00000081181_P78540	ENSG00000081181	P78540	14	0.7382823801580363	0.8712734063084434	0.03221769580113342	0.3832731358581967	-0.08394268979276377	0.6983947056979961
ENSG00000081307_Q9GZZ9	ENSG00000081307	Q9GZZ9	3	0.0005631042068816911	0.007106105877680304	-0.3236304049939193	0.836825265038487	0.01986209427178646	0.9462009027822853
ENSG00000081721_Q9UNI6	ENSG00000081721	Q9UNI6	1	0.9774653675054962	0.9891762145602745	0.0027243366961378673	0.40144738431795934	-0.08079126971459342	0.7129669930526331
ENSG00000081760_Q86V21	ENSG00000081760	Q86V21	12	0.3003572466500193	0.5320305194024493	-0.09963927592950853	0.8167702184188917	-0.02234432059811233	0.9395277463083894
ENSG00000081803_Q86UW7-2	ENSG00000081803	Q86UW7-2	7	0.5155616734889089	0.7229548173422817	0.06264906992140212	0.11841832729284765	0.14974798416790375	0.40179438804977863
ENSG00000081870_Q9Y547	ENSG00000081870	Q9Y547	1	0.3539235824662552	0.5854062388834795	0.08922936706829852	0.5315468880219318	-0.060287441648206715	0.7976316150546956
ENSG00000081913_O60346	ENSG00000081913	O60346	18	0.07666212272462322	0.22908233370777742	-0.16951268194138866	0.7264810851558309	-0.033728910474676174	0.8997085412785741
ENSG00000082068_Q9NW82	ENSG00000082068	Q9NW82	5	0.04161494269244821	0.15177775535417706	-0.19461541619392864	0.5293017155803901	-0.0606169560382052	0.7951939000956799
ENSG00000082153_Q7L1Q6-4	ENSG00000082153	Q7L1Q6-4	2	0.34037599783104994	0.5729310625888757	-0.0917615443532636	0.3554128134134993	0.08895473946059211	0.6744258221212244
ENSG00000082212_P23368	ENSG00000082212	P23368	18	0.018522539285443864	0.08991828088560953	-0.2242350136138664	0.029493030036117075	-0.2076570151801996	0.18988175920740297
ENSG00000082213_Q49AR2	ENSG00000082213	Q49AR2	5	0.020041882156734785	0.09467958498353085	-0.22150221781970306	0.8356293688729813	0.02000973181920406	0.9458848238814948
ENSG00000082258_O60583	ENSG00000082258	O60583	2	0.005011531840391624	0.03599552631392396	-0.26577552796244325	0.2161913890081725	-0.11885580390977515	0.5450937624895829
ENSG00000082397_A0A0A0MRA8	ENSG00000082397	A0A0A0MRA8	18	0.4201812093595825	0.6492312100714523	-0.07763000139206354	0.019019899470296725	-0.2233198152816991	0.1487685909727971
ENSG00000082458_Q92796	ENSG00000082458	Q92796	X	0.0015003729159465367	0.01475910314056104	0.29914192191550176	7.651254139710698e-06	0.4122263060950319	0.000569929465337055
ENSG00000082512_O00463	ENSG00000082512	O00463	1	0.9028311525691934	0.9569256674285669	-0.011774517684007243	0.3429755744925691	0.09127081145844597	0.6617826690123004
ENSG00000082515_E7ESL0	ENSG00000082515	E7ESL0	5	0.9319162475767164	0.9695663373950564	0.008239816227808481	0.4660710501573959	-0.0702128494198061	0.7592019092426769
ENSG00000082516_Q8TEQ6	ENSG00000082516	Q8TEQ6	5	0.8912434214993765	0.9524337171387568	-0.013186864020236585	0.7653302348703436	-0.02878267793772966	0.915537905617072
ENSG00000082701_P49841	ENSG00000082701	P49841	3	0.2521943665951086	0.4825283335487807	-0.11010032169426444	0.08038030730353457	0.1674450325807223	0.32880986499772824
ENSG00000082781_P18084	ENSG00000082781	P18084	3	0.030878179259957717	0.12608182205075316	-0.20595895186825453	0.00047297344126636916	-0.3277807566149417	0.012948153268172483
ENSG00000082805_X6RLX0	ENSG00000082805	X6RLX0	12	0.22482277881759952	0.44661408084336557	-0.11666869302877253	0.8716855876566912	-0.015577130560452287	0.958434120846987
ENSG00000082898_O14980	ENSG00000082898	O14980	2	0.2749079111257099	0.5086278086978306	0.10501336345220066	0.010659882253332984	0.2426038969781493	0.10489586131313532
ENSG00000083123_P21953	ENSG00000083123	P21953	6	0.12191742458535695	0.3083221096799347	-0.1483566132020138	0.23133096434200556	-0.11505841559660238	0.5600978464713398
ENSG00000083168_Q92794	ENSG00000083168	Q92794	0	0.4742947381102814	0.6944211819634055	0.06892727536082335	0.5989654299657335	0.0506883220962569	0.8356633340639628
ENSG00000083223_Q5VYS8	ENSG00000083223	Q5VYS8	9	0.7592858890107202	0.8832310148518019	-0.02954702487869401	0.07930078306660915	0.16803730178325998	0.3263948861751785
ENSG00000083307_Q6ISB3	ENSG00000083307	Q6ISB3	8	0.007320935783270565	0.04647107032767438	-0.25439222782625165	0.0001170875967926898	-0.3590629022292321	0.004464661577702207
ENSG00000083312_Q92973-2	ENSG00000083312	Q92973-2	5	0.01249861743336596	0.06802297374602523	-0.2374467469382679	0.35533547733058923	0.08896898327970962	0.6744258221212244
ENSG00000083444_Q02809-2	ENSG00000083444	Q02809-2	1	0.003829554672346068	0.029500495242984575	0.2735737400932609	0.057392759681759886	-0.18175131751973936	0.2743433291066198
ENSG00000083520_Q9Y2L1	ENSG00000083520	Q9Y2L1	13	0.7974275528941551	0.9012852002826892	-0.024752270686429156	0.27012688544357616	0.10605972487083187	0.5980701937231273
ENSG00000083535_Q8WXW3	ENSG00000083535	Q8WXW3	13	0.008720394510700332	0.052420225970210337	-0.2489698717319301	8.511101868591827e-05	-0.3657753889293946	0.003495007600653798
ENSG00000083544_Q9H7E2-3	ENSG00000083544	Q9H7E2-3	13	0.0002045172260786612	0.00323096415762673	-0.34695546679492856	0.6949042334181428	-0.037814194445407616	0.8862346245822461
ENSG00000083635_Q9UHK0	ENSG00000083635	Q9UHK0	13	0.4185353775904798	0.6477941893563864	-0.07790438990326701	0.4281555178019009	-0.07630926248496167	0.7335555621928261
ENSG00000083642_Q9NTI5-2	ENSG00000083642	Q9NTI5-2	13	0.0001022442638847538	0.001953963549785816	-0.3619337966026721	0.23668794366132734	-0.11375662683918147	0.5651062499423981
ENSG00000083720_P55809	ENSG00000083720	P55809	5	0.0005937665272693148	0.007419153748029801	-0.3223570643763145	8.448422666719509e-05	-0.3659291992342131	0.003495007600653798
ENSG00000083845_M0R0F0	ENSG00000083845	M0R0F0	19	0.8491201068249393	0.9324354961024556	0.018346848574641826	0.7339960862879994	0.03276565540738021	0.9008436932701307
ENSG00000083845_M0R0R2	ENSG00000083845	M0R0R2	19	0.8491201068249393	0.9324354961024556	0.018346848574641826	0.3121904770692325	0.09724265548105507	0.6379223149050204
ENSG00000083857_A0A087WVP1	ENSG00000083857	A0A087WVP1	4	0.12052964435956755	0.3066487136617913	-0.1489047103046895	0.23764569786277498	0.11352605775957095	0.5657221629538969
ENSG00000083896_J3QR07	ENSG00000083896	J3QR07	4	0.7905342122517585	0.8975909764184026	-0.025614031261725574	0.5779439360608991	0.053624134383008414	0.8265168742753396
ENSG00000083937_Q9UQN3	ENSG00000083937	Q9UQN3	3	0.6900838002269244	0.8426524430296003	-0.03844359585146119	0.05047300406167973	0.18697870607519151	0.25654662725197436
ENSG00000084072_Q9UNP9	ENSG00000084072	Q9UNP9	1	0.36272210172732827	0.5948341999592608	-0.0876170957730826	0.3178687849169419	0.09611358311172563	0.640940332445052
ENSG00000084073_O75844	ENSG00000084073	O75844	1	0.42658666853002336	0.6543405678299511	0.07656797520373446	0.2812621638619908	0.10364147382410548	0.6102771467513263
ENSG00000084090_Q9NQZ5	ENSG00000084090	Q9NQZ5	2	0.8243425313527518	0.9174648517427412	0.021405461693555783	0.7192779747896344	0.03465531467327745	0.8973115299907298
ENSG00000084092_Q8NC60	ENSG00000084092	Q8NC60	4	0.04296553414243708	0.15526905806750652	-0.1933685866355356	0.008211777796299858	-0.250845251129662	0.08870935676744837
ENSG00000084207_P09211	ENSG00000084207	P09211	11	0.6538506608937751	0.8198769237496504	0.043228925737263835	0.7337873965003255	0.03279236082835736	0.9008436932701307
ENSG00000084234_Q06481-3	ENSG00000084234	Q06481-3	11	0.7446276883828543	0.8750169552783124	0.031408386703025815	0.7686369150660365	0.028365283386948888	0.9168848516672443
ENSG00000084444_A2RU67	ENSG00000084444	A2RU67	12	0.005126749165948171	0.036451129030619145	-0.26510621679493435	0.011513590240513995	-0.2401199493830449	0.10997132619888655
ENSG00000084463_Q9Y2W2	ENSG00000084463	Q9Y2W2	12	0.395835526389853	0.6281988851375592	-0.08175510729413167	0.2387660639251373	-0.11325716144237676	0.5667044851813374
ENSG00000084623_Q13347	ENSG00000084623	Q13347	1	0.48708404390827	0.7045039608328815	0.0669516970515771	0.14313569049496666	0.14051878321627884	0.44815602801112236
ENSG00000084652_P40222	ENSG00000084652	P40222	1	0.0019698757484415096	0.01800745002363198	-0.2919502467350402	0.3893860898431512	-0.0828729085503385	0.7044945007255632
ENSG00000084733_P61026	ENSG00000084733	P61026	2	0.7921518882188295	0.898850476780635	-0.025411621197636097	0.1643420289056707	0.13352077177303753	0.4791875453662843
ENSG00000084754_P40939	ENSG00000084754	P40939	2	0.02038170748822572	0.09578495321803407	-0.22091550466532076	0.06210848736618677	-0.1784782715014214	0.2868543403516889
ENSG00000084774_P27708	ENSG00000084774	P27708	2	6.835102100949623e-06	0.0002446348689803156	-0.41423966786879335	2.271932899072881e-06	-0.4332473213514478	0.00019936989248576543
ENSG00000085063_E9PNW4	ENSG00000085063	E9PNW4	11	0.9722256424373372	0.9874934383844183	0.003358024739605745	0.3270885864244398	-0.094307727884496	0.6497190102974625
ENSG00000085224_P46100	ENSG00000085224	P46100	X	0.4066012596447582	0.6369816287700878	-0.07991309254470623	0.9929127804080836	0.0008567120554308394	0.9979075607201088
ENSG00000085231_Q16594	ENSG00000085231	Q16594	5	0.8303891420327634	0.9207973419880197	0.020657206532183364	0.00030163197903482176	-0.33822231833325944	0.009201211703319372
ENSG00000085231_Q9Y3D8	ENSG00000085231	Q9Y3D8	0	0.8303891420327634	0.9207973419880197	0.020657206532183364	0.23866010162463944	0.1132825555451042	0.5667044851813374
ENSG00000085365_O15126	ENSG00000085365	O15126	5	0.4927986751850268	0.7086878895678973	-0.06607791474710173	0.5330871933164625	0.06006177993872135	0.79834964453753
ENSG00000085377_P48147	ENSG00000085377	P48147	6	8.325601108468652e-05	0.0016533756433275522	-0.366233702521593	0.4329005443874697	-0.0755300694296192	0.735819914881745
ENSG00000085415_Q96EE3	ENSG00000085415	Q96EE3	18	0.00429422065129096	0.03230425745281001	-0.27028092201935394	0.2417177497929136	-0.11255291051459916	0.5699655533166422
ENSG00000085433_A0A0A0MRE6	ENSG00000085433	A0A0A0MRE6	1	0.3431894565673646	0.5754774742524866	-0.0912305406322714	0.20543919519024573	0.12166885425440176	0.5304488046709851
ENSG00000085449_Q8IWB7	ENSG00000085449	Q8IWB7	2	0.3809303810225877	0.6118645952784212	0.08435540379186365	0.3558348795898937	-0.08887703694109225	0.6748011363685195
ENSG00000085491_Q6NUK1	ENSG00000085491	Q6NUK1	1	0.09087277534479783	0.2545506464985486	-0.16199644517053938	0.013533357438907056	-0.23482990145533505	0.12139304439599896
ENSG00000085511_F5H538	ENSG00000085511	F5H538	6	0.05736818568470972	0.1891865988092848	-0.18176894136557745	0.5875530917059035	0.05227620656444805	0.829894076016661
ENSG00000085662_P15121	ENSG00000085662	P15121	7	0.8267644758295105	0.9191686232053882	0.02110560112857001	0.5776820616954073	0.05366101308127775	0.8265168742753396
ENSG00000085719_O75131	ENSG00000085719	O75131	8	0.14772222285097125	0.346215420555273	-0.13894230488748766	0.04643672999029226	0.1903076904358747	0.2468661347035786
ENSG00000085733_Q14247	ENSG00000085733	Q14247	11	0.5981386241432218	0.7819030355208884	-0.05080290145475423	0.0886755952336812	-0.1630942904386901	0.3457406757499245
ENSG00000085760_P46199	ENSG00000085760	P46199	2	0.4784082178879436	0.6971971613342817	0.06828877051308467	0.9599677324634648	0.004841091982638917	0.9894706272875331
ENSG00000085832_P42566	ENSG00000085832	P42566	1	0.1285678906459761	0.31894820545477415	0.1457947697279504	0.2757789062964023	0.10482406356740777	0.6036911835997291
ENSG00000085840_Q13415	ENSG00000085840	Q13415	1	0.948054079749758	0.9771292919589334	-0.006283587391170683	0.018917245373317213	0.22350700577559468	0.14823322323794058
ENSG00000085872_Q8IWX8	ENSG00000085872	Q8IWX8	19	0.7246659592630863	0.8637538319221566	-0.03396206420925539	0.012227505130676088	-0.2381635959885449	0.1140957416980166
ENSG00000085978_Q676U5	ENSG00000085978	Q676U5	2	0.07825974954499096	0.23232217121252002	-0.16861460843723267	0.2464060492185802	-0.11144647673894507	0.5752083463530308
ENSG00000085999_Q92698	ENSG00000085999	Q92698	1	0.4614935791613807	0.6827987974712795	0.07093380290942339	0.9134290855994648	0.01048499472455482	0.9749468837214562
ENSG00000086061_P31689	ENSG00000086061	P31689	9	0.2340766264920865	0.45824333400104084	0.11438859693944595	0.9857115524991756	0.001727274221645158	0.996589006143331
ENSG00000086065_Q9NZZ3	ENSG00000086065	Q9NZZ3	9	0.3238730381705243	0.5573854107064036	-0.09493378673242267	0.8527305481623713	0.017902752703137098	0.9520815187104174
ENSG00000086102_Q12986	ENSG00000086102	Q12986	9	0.18080585001417768	0.3926654301816303	-0.1285381379385748	0.00063367849902362	0.3207871114967452	0.015633211191950446
ENSG00000086189_Q9UNQ2	ENSG00000086189	Q9UNQ2	5	0.21192420747113447	0.4329377150369677	-0.11996000000839065	0.09516725240269	-0.1599100278758294	0.3563298002764939
ENSG00000086200_Q9UI26	ENSG00000086200	Q9UI26	5	0.005238508382390533	0.03703789129737056	-0.26446968049438824	0.4510307029537473	-0.07259667811240289	0.7504688205050439
ENSG00000086232_Q9BQI3-2	ENSG00000086232	Q9BQI3-2	7	0.14331064370006358	0.3400273137977164	-0.14045795340567555	0.921946342697364	0.009449990596024204	0.9766807129683006
ENSG00000086475_P49903	ENSG00000086475	P49903	10	0.2613445236652874	0.4930367949432983	-0.10801495564064913	0.9863741373903904	-0.0016471690743631922	0.996589006143331
ENSG00000086504_Q13084	ENSG00000086504	Q13084	16	0.32275600998676685	0.5559531522924881	0.0951522026402352	0.287443180461282	-0.1023267482804133	0.6160458394228746
ENSG00000086544_Q96DU7	ENSG00000086544	Q96DU7	19	0.03065887147201926	0.12608182205075316	0.2062234462020139	0.5358611730866333	0.059656197341642174	0.7996831906033891
ENSG00000086589_Q9NW64	ENSG00000086589	Q9NW64	5	0.06890414519277226	0.21251594926787354	-0.17410113204227567	0.3729857966766676	0.08576654925712679	0.6913619830760221
ENSG00000086598_Q15363	ENSG00000086598	Q15363	12	0.09327353329816206	0.25916133045783185	0.16082068646278055	0.17284940877914434	-0.13090234049393362	0.4901004170584816
ENSG00000086666_Q6FIF0-2	ENSG00000086666	Q6FIF0-2	15	0.08171152365953893	0.2384410921080307	-0.16672338418495525	0.5388727415855885	-0.05921705541928264	0.80193058309459
ENSG00000086712_Q9NUQ3	ENSG00000086712	Q9NUQ3	X	1.920971430981472e-16	5.852493623419952e-14	0.6834548904252523	6.625167461522741e-08	0.4874782879878357	9.431293946336596e-06
ENSG00000086758_Q7Z6Z7-2	ENSG00000086758	Q7Z6Z7-2	X	0.08120791848704742	0.23757453491952385	-0.1669952726663602	0.6399288886078084	0.04509525413275084	0.8569874190404343
ENSG00000086827_O43264	ENSG00000086827	O43264	11	0.82022178883503	0.9154519084337412	0.021916121263858585	0.9496014124575334	0.006096166043079693	0.9853686831833772
ENSG00000087008_O15254	ENSG00000087008	O15254	4	0.7343200735147281	0.8698424954592001	0.03272420062244468	0.36716103354547786	-0.08681285943214084	0.6871263747859571
ENSG00000087053_Q13614	ENSG00000087053	Q13614	11	0.039317280521712315	0.1468602429864667	-0.19681642888017814	0.0021682967475107283	-0.2893708666998511	0.03764257171965779
ENSG00000087077_Q15654	ENSG00000087077	Q15654	7	0.9581061050143912	0.9813207230508167	-0.005066417865065658	0.34339763419599434	0.09119135905050303	0.6617945982730264
ENSG00000087087_Q9BXP5-2	ENSG00000087087	Q9BXP5-2	7	0.3204667009783521	0.5534777946286424	0.09560136250596253	0.1430596459310322	-0.14054524083375014	0.4481369642220989
ENSG00000087088_Q07812-2	ENSG00000087088	Q07812-2	19	0.635085250639374	0.8090217299015553	-0.04574848006466675	0.09022743112316277	0.16231669312958752	0.34779469499359295
ENSG00000087111_Q96S52	ENSG00000087111	Q96S52	17	0.030693132645166807	0.12608182205075316	-0.2061820204422901	0.06974031671066631	-0.17358707797543108	0.3043300196515861
ENSG00000087152_Q14CW9	ENSG00000087152	Q14CW9	17	0.12712368677285413	0.3168090305688556	0.14634228972140234	0.7326333450459841	0.03294008629285272	0.9008436932701307
ENSG00000087157_Q32NB8	ENSG00000087157	Q32NB8	17	0.43201711644645946	0.6589856864061634	-0.07567476800730423	0.6872707109654586	-0.038811646130969615	0.8803551638561743
ENSG00000087191_P62195	ENSG00000087191	P62195	17	0.6873447626533783	0.8413540727067829	-0.03880195045219455	0.1670598599359561	0.13267357731428134	0.4820655237611418
ENSG00000087206_Q96RL1	ENSG00000087206	Q96RL1	5	0.02311675227481425	0.10512894878747184	0.21647701727520569	0.6627984787425594	0.04203782722122867	0.869524279095809
ENSG00000087258_P09471-2	ENSG00000087258	P09471-2	16	0.03168308771725613	0.12776089159059043	0.2050016268068639	0.8742850653881418	0.015258921939189532	0.9600051643600337
ENSG00000087263_Q8N543	ENSG00000087263	Q8N543	16	0.8576828522197436	0.9357002297204472	0.017294209866666157	0.5520691470170865	-0.057306856055902924	0.810152841611684
ENSG00000087269_P78316	ENSG00000087269	P78316	4	0.8065778804272703	0.9070895199890918	0.023611348422942317	0.8332872518546182	-0.02029900869712244	0.9446183216033771
ENSG00000087274_P35611-3	ENSG00000087274	P35611-3	4	0.4128831753868668	0.6439229237015759	-0.078851514930569	0.010199265286355542	-0.244017460912428	0.10192900690233012
ENSG00000087299_Q9H9P8	ENSG00000087299	Q9H9P8	14	5.8695554640729076e-05	0.0012562038467872254	-0.3734132577294934	0.031537474941458324	-0.205173276498724	0.19884750440450988
ENSG00000087301_Q9P2K2	ENSG00000087301	Q9P2K2	14	0.4257601324058332	0.6540228998038199	0.07670449598078745	0.979724203077297	0.002451192323499409	0.9947043256620004
ENSG00000087302_Q9Y224	ENSG00000087302	Q9Y224	14	0.4927516417149299	0.7086878895678973	0.06608508431449008	0.7501364590320755	-0.03070754113589818	0.9080552849909893
ENSG00000087365_Q13435	ENSG00000087365	Q13435	11	0.8897526627680273	0.9517163394996716	-0.013368758345380876	0.21981635219266005	-0.11792988407602598	0.5483924801448716
ENSG00000087460_Q5JWF2	ENSG00000087460	Q5JWF2	20	0.5492945726136547	0.7467664008012489	0.05770661286512462	0.22887644153621034	0.1156619392362067	0.5581167664751728
ENSG00000087470_O00429	ENSG00000087470	O00429	12	0.01941136256078804	0.0928660198697831	-0.22261387921728865	0.16773433290804715	0.13246491688606882	0.48285742014127425
ENSG00000087586_O14965	ENSG00000087586	O14965	20	0.028249944055077438	0.11994809891978173	-0.20923952119676265	0.6386431395947268	-0.04526845328850269	0.8566881795137524
ENSG00000087842_O00625	ENSG00000087842	O00625	X	0.005885497910950304	0.040134154215145504	0.2610061171980582	0.000771262453048901	0.3159934506846709	0.017772328324572876
ENSG00000087884_E9PNP3	ENSG00000087884	E9PNP3	11	0.8841962540388473	0.9492261090215383	-0.014047139858508651	0.6755149994134213	-0.04035583370189218	0.8746719484015296
ENSG00000088035_A2A2G4	ENSG00000088035	A2A2G4	1	0.14373393670251133	0.3403611793938849	-0.14031100987520473	0.21892803507224914	-0.11815577913966152	0.5483924801448716
ENSG00000088038_O75175	ENSG00000088038	O75175	19	0.18493118471093287	0.3984826718176054	-0.12734223402295008	0.7334181458937138	-0.03283961882944017	0.9008436932701307
ENSG00000088205_Q9NVP1	ENSG00000088205	Q9NVP1	2	0.2219351767655826	0.4442209620252657	-0.11739367146037932	0.056656337638353774	-0.1822821682811855	0.2737107834926804
ENSG00000088247_Q92945	ENSG00000088247	Q92945	19	0.1108797814276614	0.29037760039034105	0.1528573309249519	0.6270412449829872	0.04683793323196246	0.8523948716905074
ENSG00000088256_P29992	ENSG00000088256	P29992	19	0.4221626835003568	0.6507057420863164	0.0773004801106227	0.484490190574137	0.06735010284668523	0.7710917169733967
ENSG00000088280_Q8TDY4-3	ENSG00000088280	Q8TDY4-3	1	0.031008478561383238	0.1262459586673283	-0.20580255762946628	0.053618890083130415	-0.18453347292672745	0.26534430833368605
ENSG00000088305_Q9UBC3	ENSG00000088305	Q9UBC3	20	0.0019042036388088625	0.017658677242992478	0.2928559203279747	0.47573982894455397	-0.06870262492008387	0.7649571647135575
ENSG00000088325_Q9ULW0	ENSG00000088325	Q9ULW0	20	0.04626788145832099	0.16374694359690697	-0.19045210352738184	0.2650207373344008	-0.10719116624836966	0.5950040801387595
ENSG00000088356_Q9NUG6	ENSG00000088356	Q9NUG6	20	0.07693984140467727	0.22947923507468482	0.16935549509381015	0.7188094412009345	-0.034715682129573835	0.896919044232174
ENSG00000088387_Q9BZ29-4	ENSG00000088387	Q9BZ29-4	13	0.04990531790312018	0.17210135488092887	0.1874332880270096	0.2116112710792421	0.12004159754983244	0.5390782094448463
ENSG00000088448_Q9NXR5	ENSG00000088448	Q9NXR5	13	0.9806883148234864	0.9902232187451045	0.0023346154089047885	0.30895048088240457	0.0978928792805706	0.6361738285222384
ENSG00000088682_O75208	ENSG00000088682	O75208	16	0.01068554592063005	0.0607111510378398	-0.2425267252989546	0.03420157493975514	-0.20213344714513026	0.20835263132169396
ENSG00000088756_Q9P2N2	ENSG00000088756	Q9P2N2	18	0.003983959352487165	0.030371098072209612	-0.2724416792871577	0.06268934057080207	-0.17808930172848011	0.2876704267167321
ENSG00000088808_Q96KQ4	ENSG00000088808	Q96KQ4	14	8.546938317128331e-05	0.0016867555837697188	0.3656879223388297	0.3746139598194565	-0.08547586951763063	0.6917899074318962
ENSG00000088812_O75882	ENSG00000088812	O75882	20	0.6792603333640711	0.8370189091346801	-0.03986276909705204	0.04722981676089778	-0.18963515187073687	0.24860657861159507
ENSG00000088832_P62942	ENSG00000088832	P62942	20	0.1258719848712624	0.31480419429903167	0.14682070336670322	0.04470035154523525	0.19181410773708946	0.24164595105382025
ENSG00000088833_Q9UNZ2	ENSG00000088833	Q9UNZ2	20	0.1755243639401763	0.38595864129157126	0.1300987329151309	0.3709994090541183	0.0861222351007726	0.6900761365855639
ENSG00000088888_Q7Z434	ENSG00000088888	Q7Z434	20	0.6923604918370649	0.8441619604009654	0.03814612958323006	0.11650193670406207	0.15052352845409572	0.399646901635676
ENSG00000088930_Q9H0D6	ENSG00000088930	Q9H0D6	20	0.01714105482525736	0.0851464203833041	-0.22689325546042374	0.9047704561280934	0.011538400854812357	0.9711728455021056
ENSG00000088986_P63167	ENSG00000088986	P63167	12	0.19985273755744212	0.41788250013722655	0.123172197965609	0.5913572509746653	0.051745368270456935	0.8313203710831278
ENSG00000089006_Q9Y5X3	ENSG00000089006	Q9Y5X3	20	0.7707666535031371	0.8889143910326549	-0.028096729239141024	0.2955397658694121	0.10063271388938776	0.6244914487331372
ENSG00000089009_Q02878	ENSG00000089009	Q02878	12	0.9172619350291448	0.9630783114485078	-0.01001909236798004	0.05644268562039211	-0.18243723877310566	0.2729769988017639
ENSG00000089022_Q8IW41-2	ENSG00000089022	Q8IW41-2	12	0.2020091501534116	0.4206057447152381	-0.12258836135019945	7.522995132118514e-05	0.368333204470538	0.003278388218799401
ENSG00000089048_Q9H501	ENSG00000089048	Q9H501	20	0.5376916900405236	0.7390490033427461	-0.05938912914146394	0.4400500563945816	-0.07436516958585726	0.7415878005150327
ENSG00000089050_O75884	ENSG00000089050	O75884	20	0.010016522030129838	0.05800243789842096	-0.2445938407361874	0.4707076817899008	-0.06948651986574331	0.7616452158489782
ENSG00000089053_Q9UJX4	ENSG00000089053	Q9UJX4	12	0.5015808846538685	0.7134613928690295	-0.06474545068622292	0.6400990334611869	-0.045072345234634964	0.8569874190404343
ENSG00000089063_Q96A57-2	ENSG00000089063	Q96A57-2	20	0.9369974654580407	0.9712502035002264	0.007623547658195148	0.9935401679514889	-0.0007808709434735687	0.9979075607201088
ENSG00000089094_Q8NHM5	ENSG00000089094	Q8NHM5	12	0.3261510266700045	0.5602404430462252	0.09448985919929953	0.4771646282065938	0.06848148991041211	0.7656839142553684
ENSG00000089154_Q92616	ENSG00000089154	Q92616	12	0.0935308401844809	0.25969046791860795	-0.16069609845870594	0.6302588541886066	-0.04640144981646533	0.8539420938942923
ENSG00000089157_P05388	ENSG00000089157	P05388	0	0.2781159927674885	0.5100940400063808	-0.10431810555859199	0.4035570494147655	-0.08043100060490976	0.7149298834488351
ENSG00000089159_A0A1B0GTU4	ENSG00000089159	A0A1B0GTU4	12	0.019811423493258	0.09395185938978398	0.22190499853064724	4.1046188719883084e-05	0.3805891359336738	0.0021035350795165684
ENSG00000089177_Q96L93-2	ENSG00000089177	Q96L93-2	20	0.09541834783620733	0.26315856923916997	0.15979035804485908	0.4191712404694	0.07779830656530712	0.7273052455165159
ENSG00000089195_Q9UJA5	ENSG00000089195	Q9UJA5	20	0.6394902251390642	0.8108872942208962	0.045154328917146734	0.04779587976751423	0.18916083516340945	0.2503519262393264
ENSG00000089220_P30086	ENSG00000089220	P30086	12	0.8323783926363798	0.9222907224646986	0.02041131106600397	0.9145309121680046	-0.010351037856459409	0.9750284433640587
ENSG00000089234_Q7Z569	ENSG00000089234	Q7Z569	12	0.5990132333021156	0.7826997260225483	0.05068169963843093	0.005000646595074567	0.26583946879083803	0.06524265191048406
ENSG00000089248_P30040	ENSG00000089248	P30040	12	0.08966013612062756	0.25278013454569453	0.16259971417406827	0.12311212538108515	-0.1478886110949734	0.41198820925324436
ENSG00000089280_P35637-2	ENSG00000089280	P35637-2	16	0.8835767524893939	0.9488826457061045	-0.014122816631325688	0.8320842141749415	0.02044766680349205	0.9440936574814672
ENSG00000089289_P78318	ENSG00000089289	P78318	X	0.03734677323531621	0.1420292307842377	0.1987915549588833	0.13911499978933226	0.14193251971304902	0.4416339651126081
ENSG00000089351_Q96CP6-3	ENSG00000089351	Q96CP6-3	19	0.004015693846148589	0.030576226580951098	-0.2722138867372215	0.057374856093239876	-0.18176415690621425	0.2743433291066198
ENSG00000089597_Q14697-2	ENSG00000089597	Q14697-2	11	0.1654762484470047	0.3723732869243918	-0.13316596171448344	0.019657872586368638	-0.2221756097747173	0.1517266841023841
ENSG00000089639_Q9P107-2	ENSG00000089639	Q9P107-2	19	0.0010282671333039606	0.01123115911979412	-0.30883099596627617	0.6705488138585504	-0.041011233249441975	0.8725443228880507
ENSG00000089685_A0A0B4J1S3	ENSG00000089685	A0A0B4J1S3	17	0.10087171253455857	0.27291371683241195	-0.1572506050584596	0.4390374423919801	-0.07452950269545043	0.7411206918881446
ENSG00000089693_Q15773	ENSG00000089693	Q15773	12	0.041616094877696214	0.15177775535417706	0.194614338228072	0.50393704329446	-0.06439004948959143	0.7790560844620232
ENSG00000089737_Q9GZR7	ENSG00000089737	Q9GZR7	14	0.0983991627716692	0.26845766415095795	0.15838837359596875	0.42538613102739503	0.07676632071806072	0.7319340538809295
ENSG00000089818_Q8NC96	ENSG00000089818	Q8NC96	12	0.9186191908376848	0.9636117747544757	0.009854166829396323	0.48973145484757297	0.06654622845144373	0.7738070036692866
ENSG00000089820_P98171	ENSG00000089820	P98171	X	0.7728323410981	0.889874754000709	-0.02783645695016281	0.05253089894297562	0.1853654350029535	0.26203557781636255
ENSG00000089902_Q9UKL0	ENSG00000089902	Q9UKL0	14	0.03294909067243862	0.1310310667984298	0.2035366999496143	0.11390409980684794	0.15159078536635326	0.3949607862047112
ENSG00000090013_P30043	ENSG00000090013	P30043	19	0.03368086883306665	0.13317947972806551	0.20271148198187092	0.00847344827389527	0.2498680130654919	0.09016762399098523
ENSG00000090020_P19634	ENSG00000090020	P19634	1	0.8495772414960663	0.9324448761049169	0.01829059851730881	0.9306592714769204	-0.0083923170920833	0.9790030708129203
ENSG00000090054_O15269	ENSG00000090054	O15269	9	0.4250513692897355	0.6533670428140599	-0.07682168544773335	0.3364531292178574	-0.09250658591833644	0.6567805691871658
ENSG00000090060_P51003	ENSG00000090060	P51003	14	0.010672429712019696	0.0607111510378398	-0.24256614593771406	0.5507809927016797	0.05749233000365157	0.8098010188769704
ENSG00000090061_O75909	ENSG00000090061	O75909	14	0.2653646752695892	0.4986903642340099	0.10711449292542344	0.25709910781461265	0.10897618581852468	0.5861127703417824
ENSG00000090263_Q9Y291	ENSG00000090263	Q9Y291	7	0.4614365215920222	0.6827987974712795	0.07094281424696951	0.8519587306669444	-0.017997656959013418	0.9516814242569517
ENSG00000090273_Q9Y266	ENSG00000090273	Q9Y266	1	0.5673523619125005	0.7577551103969185	0.055121981809679456	0.8430622703109264	0.019092849682518242	0.9476625252036217
ENSG00000090316_E7ESC7	ENSG00000090316	E7ESC7	4	0.3701140369625652	0.6015065223596333	0.08628114666091262	0.8643960358891561	-0.016470367025107513	0.9557641304639054
ENSG00000090372_Q9NRL3	ENSG00000090372	Q9NRL3	19	0.09931382324477657	0.26981985942571757	0.1579648899986043	0.99347136864621	-0.0007891876541952017	0.9979075607201088
ENSG00000090432_Q969V5	ENSG00000090432	Q969V5	1	0.9835247666661271	0.9918018934829219	0.001991660754566388	0.05833021154267864	-0.18108357461999086	0.27700442714370077
ENSG00000090447_Q01664	ENSG00000090447	Q01664	16	0.9134792903021012	0.9617146476041909	0.01047889055109808	0.5455740882863007	-0.05824420027493234	0.8067585411765327
ENSG00000090487_Q9NZD8	ENSG00000090487	Q9NZD8	15	0.5505812657688891	0.747451530783224	-0.05752110636534648	0.06704226935682908	0.1752641782711153	0.29814154257790015
ENSG00000090520_Q9UBS4	ENSG00000090520	Q9UBS4	3	0.17052446136908853	0.37837914633035935	0.13160828021608575	0.07193621968658102	-0.1722604581648729	0.30908247843667996
ENSG00000090530_Q8IVL5	ENSG00000090530	Q8IVL5	3	0.10961051980195108	0.28814291039804674	0.15339689968871048	0.049950766632640864	0.1873967374181848	0.2552684988200023
ENSG00000090612_Q14587	ENSG00000090612	Q14587	12	0.04583081693317223	0.16247242600539794	-0.19082795951835255	0.056461836311635524	-0.1824233193983098	0.2729769988017639
ENSG00000090615_Q08378	ENSG00000090615	Q08378	12	0.332240453943733	0.5656391496193359	0.09331283070443427	0.4402218080905664	0.07433731791779657	0.7415878005150327
ENSG00000090621_Q13310-3	ENSG00000090621	Q13310-3	1	0.6993519132992778	0.8495661353256216	0.037234870945976564	0.09264130043332043	-0.16112797277813545	0.3507447816642144
ENSG00000090661_Q9HA82	ENSG00000090661	Q9HA82	19	0.08704594438402803	0.24828278148258334	0.16392260846929707	0.02030344525413261	0.2210498754498043	0.15502249141593982
ENSG00000090686_Q86UV5	ENSG00000090686	Q86UV5	1	0.9969018985051016	0.9984055220137676	-0.00037449849356328233	0.8239766360779346	-0.021450780812194647	0.9417436569836987
ENSG00000090776_P98172	ENSG00000090776	P98172	X	0.20417404076046325	0.4232469071392457	0.12200671819285125	0.8253324018234971	0.021282881484108684	0.942474493459559
ENSG00000090857_Q8NCN5	ENSG00000090857	Q8NCN5	16	0.09263582929267317	0.25832494046112103	-0.16113063916990028	0.8365746533101517	-0.019893029349187352	0.9462009027822853
ENSG00000090861_P49588	ENSG00000090861	P49588	16	0.18531286534443864	0.39882254042760185	0.12723257589043174	0.5681546313165341	0.05500806898238742	0.8216526647905034
ENSG00000090863_Q92896-2	ENSG00000090863	Q92896-2	16	0.20639728108106087	0.4265992742735793	-0.12141398491306453	0.11043623397615783	-0.15304533547980664	0.3870103065596681
ENSG00000090889_O95239	ENSG00000090889	O95239	X	0.0036873988663155507	0.028668060398874623	-0.2746527467395895	0.37956389170487503	-0.08459684262756467	0.6955052317681434
ENSG00000090905_Q8NDV7-6	ENSG00000090905	Q8NDV7-6	16	0.09362997967942653	0.2597813507356922	0.16064816746317775	0.4526706438908215	-0.07233463556681992	0.7516350815875071
ENSG00000090924_Q9H7P9-3	ENSG00000090924	Q9H7P9-3	19	0.7513160594924433	0.8788011884942075	-0.030557677178293958	5.60547041904933e-05	0.3743463494462066	0.002644759238887918
ENSG00000090971_Q8WUY8	ENSG00000090971	Q8WUY8	19	0.07751479401407801	0.23075950191690986	0.1690315194915723	0.04354289326938954	0.19284553423978196	0.23847909816351212
ENSG00000090989_Q9NV70	ENSG00000090989	Q9NV70	4	0.4771446905996298	0.6959962272504386	-0.06848458185145309	0.09736619102517106	0.15887037841268714	0.3609535993676191
ENSG00000091009_Q9P2N5	ENSG00000091009	Q9P2N5	5	0.8124354493975847	0.9110955163628428	0.02288270614503825	0.17699529207270487	0.12966067183587154	0.4943390962725523
ENSG00000091039_Q9BZF1	ENSG00000091039	Q9BZF1	12	0.4025409339906815	0.6338793976711328	-0.08060438406513662	0.6543801100886619	0.0431582677253275	0.8637633672265028
ENSG00000091073_Q86UW9-2	ENSG00000091073	Q86UW9-2	7	0.08390213294236916	0.24246428296254663	-0.16555607017648102	0.6493406393870295	-0.043831748644618786	0.8610824279953918
ENSG00000091127_Q96PZ0	ENSG00000091127	Q96PZ0	7	0.048426210783847776	0.16838746903641566	-0.1886381139312892	0.4588278662184532	-0.07135546807931979	0.7541391580384349
ENSG00000091136_P07942	ENSG00000091136	P07942	7	0.9518045904308324	0.978844493568072	0.0058293441459952395	0.636657621496807	0.045536199985380825	0.8554368727637487
ENSG00000091140_P09622	ENSG00000091140	P09622	7	0.07213249108594012	0.2193755789867646	0.17214348451268402	0.08301352133021045	0.16602661610536412	0.3350641534279884
ENSG00000091157_Q9Y4E6-2	ENSG00000091157	Q9Y4E6-2	18	0.2575336683109997	0.48871283800417786	-0.10887729830678683	0.08630655929289018	0.16430249719343298	0.3403752032025772
ENSG00000091164_O43396	ENSG00000091164	O43396	18	0.6363357841284205	0.8091503798581983	-0.04557963230911601	0.0034417909864071965	0.27660810825389875	0.05117115272903119
ENSG00000091409_P23229-5	ENSG00000091409	P23229-5	2	0.8601845480134824	0.9369444827485233	0.01698705908185519	0.04996982477681594	-0.18738141872923192	0.2552684988200023
ENSG00000091483_P07954-2	ENSG00000091483	P07954-2	1	0.17030239314405335	0.3782846568085575	-0.13167607931376674	0.09819130150073098	-0.15848504430380048	0.36275287048078586
ENSG00000091490_Q68CR1-2	ENSG00000091490	Q68CR1-2	4	0.9663920033417128	0.9842593796092847	0.004063709658123371	0.7309869672226079	-0.0331509646734477	0.9006929240292415
ENSG00000091527_Q9UKY7	ENSG00000091527	Q9UKY7	3	0.13206760530861492	0.32315499406337406	-0.1444872479693445	0.4522966977991818	0.07239434095229234	0.7514036945284125
ENSG00000091542_Q6P6C2	ENSG00000091542	Q6P6C2	17	0.2682755795979843	0.5022239352107656	0.10646825655652517	0.9452677787649312	0.006621138792699407	0.983916694396735
ENSG00000091640_O75391	ENSG00000091640	O75391	17	0.09398953789794384	0.2602376409892807	0.16047466782991102	0.7535452138525038	-0.030274669585012237	0.9089307940425829
ENSG00000091651_Q9Y5N6	ENSG00000091651	Q9Y5N6	16	0.7895286275954596	0.8974814024434302	0.02573991009087223	0.4016586039636125	0.08075514921578382	0.7131444060396069
ENSG00000091732_Q86WB0	ENSG00000091732	Q86WB0	7	0.3915842886295732	0.6232880574041071	-0.08249068668423233	0.03732537519733945	-0.19881347818777145	0.2179638591742539
ENSG00000091972_U3KQG5	ENSG00000091972	U3KQG5	3	0.448870854440801	0.6722451212488119	-0.07294260836346445	0.3400262758399565	-0.09182774318640084	0.6597647461347405
ENSG00000092010_Q06323	ENSG00000092010	Q06323	14	0.718075115928497	0.8605271158482874	-0.03481032211661121	0.6416103991584569	0.044868959731304	0.8573747070311635
ENSG00000092036_Q9H6D7	ENSG00000092036	Q9H6D7	14	0.011009474585695471	0.06205073087222492	-0.2415663723484223	0.02389583769351953	0.21529531198606897	0.1675496010129418
ENSG00000092068_Q9UHI5	ENSG00000092068	Q9UHI5	14	0.759754413836667	0.8834515807003094	0.029487711948407186	0.4010836801087269	-0.0808534928450595	0.7128895607293708
ENSG00000092094_Q9NPF4	ENSG00000092094	Q9NPF4	14	0.7399275300359803	0.8727315030307086	0.03200765316695739	0.1475437247238832	0.13900296232563847	0.45473341720792826
ENSG00000092098_Q96EP0	ENSG00000092098	Q96EP0	14	0.06668411741269567	0.208100435374102	-0.17549090119982727	0.2150621226424572	-0.11914649942899168	0.5431369442755
ENSG00000092108_Q8WVM8	ENSG00000092108	Q8WVM8	14	0.9015673100072796	0.9568369179232901	0.011928432207118266	0.14982550448082266	0.13823168936237	0.4565767393889248
ENSG00000092140_G3V483	ENSG00000092140	G3V483	14	0.00010554451027582529	0.001997571292364787	-0.3612634331057016	0.2565223956089824	-0.10910759781341517	0.5856316700895015
ENSG00000092148_A0A087X2H1	ENSG00000092148	A0A087X2H1	14	0.01973423356878841	0.09378572367462458	0.2220408079827887	2.5449672447641714e-11	0.5821640042933452	1.2540815515353293e-08
ENSG00000092199_P07910	ENSG00000092199	P07910	14	0.4171036383755706	0.6467409539121438	-0.07814359524255256	0.28909108341642137	-0.1019794188799092	0.6175894263646862
ENSG00000092199_P07910-2	ENSG00000092199	P07910-2	14	0.4171036383755706	0.6467409539121438	-0.07814359524255256	0.9045922854560208	0.01156009087653749	0.9711728455021056
ENSG00000092201_Q9Y5B9	ENSG00000092201	Q9Y5B9	14	0.22040720459251434	0.44267984087412365	-0.11777999046720393	0.05344303987955151	-0.1846669937847067	0.26497066974614525
ENSG00000092203_O94842-3	ENSG00000092203	O94842-3	14	0.8681997435084478	0.9404719409408783	-0.016004104799578638	0.4144468276841145	-0.07858874586104322	0.7234186316469857
ENSG00000092208_O14893	ENSG00000092208	O14893	14	0.6764157847284379	0.8347558920434627	0.040237152696408526	0.5372304002907521	0.059456387715139586	0.8009071315481866
ENSG00000092330_Q9BSI4	ENSG00000092330	Q9BSI4	14	0.1451068869661763	0.3421109523374495	0.13983663892256715	0.7526267985638518	0.030391237884584525	0.9086557240105607
ENSG00000092421_A0A0A0MQU6	ENSG00000092421	A0A0A0MQU6	5	0.4697549126496983	0.6898232201288453	0.06963545165178034	0.6315943085419613	0.04622056523549757	0.8539453652426771
ENSG00000092439_H0YLN8	ENSG00000092439	H0YLN8	15	0.06543051412832808	0.20591272081617407	-0.1762923474544589	0.8866774518112407	-0.01374412789153982	0.9658316198440415
ENSG00000092445_H0YNK6	ENSG00000092445	H0YNK6	15	0.20946489867295284	0.43015991747003784	0.12060359184718678	0.4595356495882692	0.07124337865298805	0.7544298747469124
ENSG00000092470_Q9H967	ENSG00000092470	Q9H967	15	0.8989332401237432	0.95565398157139	-0.012249313873037229	0.7423569618604594	0.03169775169744216	0.9038178624033166
ENSG00000092531_O00161	ENSG00000092531	O00161	15	0.3503239173515368	0.5823411221259474	-0.08989616707396289	0.0039165546726018735	-0.2729309550634059	0.05621929971186663
ENSG00000092621_O43175	ENSG00000092621	O43175	1	0.8134385085960476	0.9115403522783642	0.02275806255441984	0.7112015457409417	0.03569780963247038	0.895326018651353
ENSG00000092820_P15311	ENSG00000092820	P15311	6	4.111892996641769e-06	0.00016079532181312103	0.4231530189956747	2.2056353543538343e-06	0.43374282047420576	0.0001962402788887592
ENSG00000092841_P60660-2	ENSG00000092841	P60660-2	12	0.039176762814464604	0.14642170644816122	0.1969544959428036	0.6348965101464802	-0.04577397593983975	0.8544426563021749
ENSG00000092847_Q9UL18	ENSG00000092847	Q9UL18	1	0.04479045392152685	0.15976775089688772	-0.19173475221629865	0.2045769705533206	0.12189895185508867	0.5294531499392284
ENSG00000092853_Q9HAW4	ENSG00000092853	Q9HAW4	1	0.6971561311440359	0.8475310095562208	-0.03752071101652847	0.7687462594918466	0.028351490087340617	0.9168848516672443
ENSG00000092964_A0A1C7CYX9	ENSG00000092964	A0A1C7CYX9	8	0.00018918251187824344	0.0030817894609516195	-0.3486769678271415	0.09214643707059528	-0.16136965328305347	0.3494908678947503
ENSG00000092978_Q9NW75	ENSG00000092978	Q9NW75	1	0.5297093848358112	0.7326875443089222	-0.06055707221796764	0.365693433046038	0.08707809039323698	0.6851805007583853
ENSG00000093000_Q9UKX7	ENSG00000093000	Q9UKX7	22	0.4517488612720799	0.6746635261105502	-0.07248185991066462	0.7791700300587887	-0.02703915954355343	0.9226179690492792
ENSG00000093009_O75419-2	ENSG00000093009	O75419-2	22	0.6672806495593008	0.8287234915107506	-0.041443561693222566	0.8237673825115989	-0.021476700675225058	0.9417436569836987
ENSG00000093010_P21964-2	ENSG00000093010	P21964-2	22	0.011663931987128071	0.06472882263418382	-0.23969931757781565	0.0008446093969388041	-0.3137501129245553	0.018852152602055677
ENSG00000093144_Q9NTX5	ENSG00000093144	Q9NTX5	6	0.10505597807030488	0.2799872196362564	-0.1553741068320427	0.27220203434872264	-0.1056040413627358	0.6008705141412534
ENSG00000093167_Q9Y608	ENSG00000093167	Q9Y608	3	0.415806576747932	0.6459378773168585	0.07836071198452339	0.3331567242589088	0.09313691908462768	0.6544519110133633
ENSG00000094631_Q9UBN7	ENSG00000094631	Q9UBN7	X	0.7218160891761977	0.8627760818491755	-0.034328527570370526	0.5227867360442848	0.061577129076863066	0.7910903641811141
ENSG00000094804_Q99741	ENSG00000094804	Q99741	17	0.6295933589521886	0.8052642699297627	0.04649165000160866	0.1348052815611805	-0.14348276459314618	0.43523540070009753
ENSG00000094841_Q96BW1-3	ENSG00000094841	Q96BW1-3	X	0.1038446703207812	0.2778108051022588	0.1559112190332589	0.5617481674094573	-0.05591984863237592	0.8187847008930565
ENSG00000094880_Q9UJX2	ENSG00000094880	Q9UJX2	5	0.03141841317160323	0.12726064414456936	-0.20531412640191388	0.10105629768785204	0.15716654933398444	0.3690801841438884
ENSG00000094914_Q9NRG9	ENSG00000094914	Q9NRG9	12	0.8551458803852273	0.9346703161215347	0.01760586852860152	0.5984062608968064	-0.05076580440539236	0.835642225542321
ENSG00000094916_P45973	ENSG00000094916	P45973	12	0.009371035101945408	0.05517240461972506	-0.2467065427443745	0.023929127919138024	-0.21524555617167596	0.1675496010129418
ENSG00000095002_P43246	ENSG00000095002	P43246	2	1.1164897062144631e-05	0.0003620187642108031	-0.4053847165560836	0.10366488682909784	-0.1559913554230691	0.3756093127981905
ENSG00000095059_P49366	ENSG00000095059	P49366	19	0.4511895351025584	0.6741239869987518	-0.07257127545927647	0.09169166643094698	0.16159266150371202	0.34938236868592437
ENSG00000095066_Q96ED9-2	ENSG00000095066	Q96ED9-2	19	0.493523360098789	0.7087895003912555	-0.06596749275006752	0.4276561758217618	-0.07639154783842918	0.7331904336257085
ENSG00000095139_P48444	ENSG00000095139	P48444	11	0.2786778212507214	0.5106356875632274	0.1041969008197879	0.174704374722221	-0.13034410920257047	0.492369654408512
ENSG00000095203_Q9H329	ENSG00000095203	Q9H329	9	0.1052370729530272	0.2799986800325188	0.15529422377802832	0.4487967405915863	-0.07295449524114986	0.7504593554387203
ENSG00000095261_Q16401	ENSG00000095261	Q16401	9	0.06130404642222161	0.19814343575753773	-0.17902189865705034	0.09762423250017548	-0.15874959509791076	0.36131877901244197
ENSG00000095319_Q5SRE5	ENSG00000095319	Q5SRE5	9	0.020433617085902103	0.09593075532903601	-0.22082662409578108	0.8602448001781096	-0.016979663607369175	0.9540490596569868
ENSG00000095321_P43155-2	ENSG00000095321	P43155-2	9	0.08273015259844213	0.24063155037242004	-0.16617751416965434	0.05158431227779476	-0.18610090343236632	0.2585673743752373
ENSG00000095380_Q9NR45	ENSG00000095380	Q9NR45	9	0.0024981701917634585	0.021185954705249678	0.28552088200960146	0.07142720874705884	0.17256502375106694	0.3078184143607587
ENSG00000095485_Q69YN2	ENSG00000095485	Q69YN2	10	0.01991072526793709	0.0942708853306289	-0.22173095345249866	0.2838914330290464	-0.10307988516650557	0.6131518948024515
ENSG00000095564_A0A0A0MTH9	ENSG00000095564	A0A0A0MTH9	10	0.1609088070525503	0.3661484528297077	-0.13460597520417686	0.4969901810540792	0.06544042382286977	0.7765958180543536
ENSG00000095596_O43174-2	ENSG00000095596	O43174-2	10	0.8316904680331174	0.9217563182277464	0.020496331995168825	0.4869969150396545	0.06696506131946438	0.7724156730463558
ENSG00000095637_Q9BX66	ENSG00000095637	Q9BX66	10	0.014376361706397759	0.07483504635170896	0.23282385132558414	0.001687067927129891	0.2960663627906395	0.031671275514266746
ENSG00000095787_Q9BTA9	ENSG00000095787	Q9BTA9	10	0.12943521945146652	0.3196772379044992	-0.14546821379659394	0.001924837449352004	-0.2925683556124999	0.03505354780151013
ENSG00000095906_Q9Y5Y2	ENSG00000095906	Q9Y5Y2	16	0.7841987567986406	0.8954325853241454	0.026407830326236368	0.3547357256829211	0.08907951154572398	0.6743136672773865
ENSG00000096060_Q13451	ENSG00000096060	Q13451	6	0.0003220395886798599	0.004574261870598458	0.33672537863622937	0.0005290658962520083	0.32512077255349625	0.014017583115015369
ENSG00000096063_Q96SB4-4	ENSG00000096063	Q96SB4-4	6	0.002434718253750091	0.020818216100364436	-0.286224256176445	0.2255250988126739	-0.11649335781687968	0.5541671588009164
ENSG00000096070_Q9ULD4	ENSG00000096070	Q9ULD4	6	0.8356436177097328	0.9232302612820296	0.02000797247907436	0.8187569539448607	0.02209779509054137	0.9406307473046588
ENSG00000096080_Q9NVS2	ENSG00000096080	Q9NVS2	6	0.005936467946176392	0.04022195127168711	0.2607478751009099	0.002493676244822924	-0.28557016466300245	0.040960230831629876
ENSG00000096384_P08238	ENSG00000096384	P08238	6	0.8518836155081402	0.9338436934147895	-0.018006894188797664	0.4066498645756397	-0.07990484200087934	0.7176305874577267
ENSG00000096401_Q99459	ENSG00000096401	Q99459	6	0.9053908035563843	0.9579233790409559	0.011462885898545851	0.11020694211466404	-0.15314275509941247	0.3870103065596681
ENSG00000096433_Q14573	ENSG00000096433	Q14573	6	0.2598646697799208	0.4914157262853129	0.10834879941489113	0.4952383898467096	0.06570650987676592	0.7760511559094965
ENSG00000096696_P15924	ENSG00000096696	P15924	6	0.05809120313247099	0.19078429456437068	-0.181252979293636	0.5822325631506491	-0.05302128117919122	0.8277668267106351
ENSG00000096717_Q96EB6	ENSG00000096717	Q96EB6	10	0.00024047063133837902	0.0036619746382899783	0.34334655588085256	3.740694409976392e-05	0.3824247414801964	0.001964171179533506
ENSG00000096746_P31942	ENSG00000096746	P31942	10	0.42733090842250504	0.6543910888061175	0.07644517753756169	0.9757318955960244	0.002933967203924799	0.993410445516232
ENSG00000096872_Q96LB3	ENSG00000096872	Q96LB3	9	0.4003577686524958	0.6324805224371066	0.08097778297735267	0.10776671229036366	0.15418945419001245	0.3829022860404107
ENSG00000097007_P00519-2	ENSG00000097007	P00519-2	9	0.0016700482003230075	0.01593336648952749	-0.2963335873678785	0.4616673776665236	-0.07090635797432711	0.7570345070272106
ENSG00000097021_O00154-4	ENSG00000097021	O00154-4	1	0.17573976735596547	0.38629820478835575	0.13003441478403538	0.17749202789080573	0.12951334191315533	0.4943390962725523
ENSG00000097033_Q9Y371-2	ENSG00000097033	Q9Y371-2	1	0.4899936887160996	0.7064428807502255	-0.06650612903933993	0.11004355314708604	0.15321227082794192	0.3870103065596681
ENSG00000097046_O00311	ENSG00000097046	O00311	1	0.05829387723937614	0.19124376608567986	-0.18110929099740228	0.2755011637001483	-0.10488438369507724	0.6036911835997291
ENSG00000099194_O00767	ENSG00000099194	O00767	10	0.21057173532538814	0.43114801011193726	-0.12031327347811464	0.3278613023094157	-0.09415787044282264	0.6497190102974625
ENSG00000099203_Q13445	ENSG00000099203	Q13445	19	0.4960266076140408	0.710515270325085	0.06558672339053355	0.056907900472657265	-0.18210019571351985	0.27423762821991127
ENSG00000099204_O14639	ENSG00000099204	O14639	10	0.00010865058516483128	0.0020244160500564887	-0.3606500936263563	0.1530589901488509	-0.1371537130902205	0.46136263660684523
ENSG00000099219_Q7Z2K6	ENSG00000099219	Q7Z2K6	9	0.0010982509048093443	0.011828442697729348	-0.3071659166722874	0.03944162013495165	-0.19669460183444654	0.22619786802551503
ENSG00000099246_Q9NP72	ENSG00000099246	Q9NP72	10	0.0010376334586032078	0.011313955181155457	0.3086022624704192	0.2526220909243303	0.11000169587895026	0.5827501312428016
ENSG00000099256_Q9NRG1	ENSG00000099256	Q9NRG1	10	0.4958939301617487	0.710515270325085	-0.06560687954028614	0.9860077834677188	-0.0016914603663296364	0.996589006143331
ENSG00000099284_Q9P0M6	ENSG00000099284	Q9P0M6	10	0.004279040774162444	0.03227109917180843	-0.2703833382187967	0.04436364812940044	-0.19211183383979688	0.240834324774954
ENSG00000099290_Q641Q2	ENSG00000099290	Q641Q2	10	0.4761475777576246	0.6951820477286361	-0.0686393040361576	0.2408282607780192	0.11276450423850955	0.5687613793513525
ENSG00000099331_M0R0P8	ENSG00000099331	M0R0P8	19	0.02887394574290442	0.12097710181153694	-0.20843790820450286	0.013751798982852092	-0.2342998674939441	0.1220035975920508
ENSG00000099341_R4GMR5	ENSG00000099341	R4GMR5	19	0.13270477603586772	0.3240052445089066	0.14425205415417813	0.17539553894533427	0.13013722701163075	0.4932533822300006
ENSG00000099364_H7C112	ENSG00000099364	H7C112	16	0.3200714752416913	0.5532476932213135	-0.09567911435769694	0.4540499250851434	-0.0721146523736068	0.7527546118259392
ENSG00000099381_O15047	ENSG00000099381	O15047	16	0.7879866494924739	0.8969730709177842	0.02593301865792995	0.8601601579681158	0.01699005279414357	0.9540490596569868
ENSG00000099385_I3L1Q2	ENSG00000099385	I3L1Q2	16	0.8413336788045558	0.9275874209215716	-0.01930592446289786	0.7254492072586133	0.0338614317002247	0.8997085412785741
ENSG00000099622_D6W5Y5	ENSG00000099622	D6W5Y5	19	0.5572008791304139	0.7516753767655818	0.05657003500325389	0.528281995943887	0.06076684726777608	0.7943998775156497
ENSG00000099622_Q14011	ENSG00000099622	Q14011	19	0.5572008791304139	0.7516753767655818	0.05657003500325389	0.8327071778434104	-0.020370681875063527	0.9442949515427309
ENSG00000099624_P30049	ENSG00000099624	P30049	19	0.6312263984670187	0.8065387725471084	0.046270381851222384	0.3646822981232263	-0.08726120827315513	0.683886066094083
ENSG00000099783_P52272	ENSG00000099783	P52272	19	0.7459561477447535	0.8760319185258683	0.031239226887076532	0.5324967937536279	-0.0601482376320997	0.7983331998505963
ENSG00000099795_P17568	ENSG00000099795	P17568	19	0.6392678716945746	0.8108872942208962	-0.04518427963504341	0.029362132842494164	-0.2078209574071748	0.1894197613182453
ENSG00000099797_Q9NZ01	ENSG00000099797	Q9NZ01	19	0.2296016042224585	0.45298229920562894	0.1154831641251117	0.9035900294722872	-0.011682113619094587	0.9708977530201295
ENSG00000099800_Q9Y5L4	ENSG00000099800	Q9Y5L4	19	0.9696256313850108	0.9864232684095042	0.003672519326539366	0.5250164451798685	-0.06124784057529365	0.7924570407613991
ENSG00000099804_P49427	ENSG00000099804	P49427	19	0.5807242039195704	0.7689982926067054	0.05323307690598485	0.4871681314870289	-0.0669388004793945	0.7724156730463558
ENSG00000099810_B4DUC8	ENSG00000099810	B4DUC8	9	0.7746642996523116	0.8903298872092515	0.027605801336286387	0.4363067379208049	0.0749737315792258	0.73902193630901
ENSG00000099814_Q9Y4F5-2	ENSG00000099814	Q9Y4F5-2	14	0.8043362255160129	0.9053784628009847	-0.02389054515016338	0.5478859626251605	-0.057909938975387924	0.8083770539370949
ENSG00000099817_P19388	ENSG00000099817	P19388	19	0.2668703879463995	0.5004807305033868	0.10677961968034556	0.9956728992840824	-0.0005230611455866488	0.9985490592705196
ENSG00000099821_O00411	ENSG00000099821	O00411	19	0.4040404753175532	0.6348312461816564	-0.08034860239652701	0.3430839073826412	-0.09125041200319732	0.6617826690123004
ENSG00000099889_O00192	ENSG00000099889	O00192	22	0.2780890910748205	0.5100940400063808	-0.1043239132522786	0.2511676716345224	-0.11033752998555917	0.5812789394836526
ENSG00000099899_F2Z2W7	ENSG00000099899	F2Z2W7	22	0.9015541236304416	0.9568369179232901	0.011930038240738926	0.1554271252232155	-0.13637501577763156	0.4652645627008965
ENSG00000099901_P43487-2	ENSG00000099901	P43487-2	22	0.5043567332376485	0.7148993771218494	-0.06432683464735102	0.2836382541014641	0.10313381034711452	0.6130184398697635
ENSG00000099917_Q96RN5-2	ENSG00000099917	Q96RN5-2	22	0.14940514758539405	0.34871820389229996	0.1383731081589554	0.16668828549478454	0.13278879735940746	0.4818123539015946
ENSG00000099940_O95721	ENSG00000099940	O95721	22	0.0001072790395115884	0.0020106885068222266	0.3609188870298081	0.00740546363216635	0.2540397552204777	0.08308126099414648
ENSG00000099942_P46109	ENSG00000099942	P46109	22	0.2886724888653949	0.5205636825967198	-0.10206752132308376	0.7062299975862751	-0.03634157639565185	0.8933865253826379
ENSG00000099949_Q8N653	ENSG00000099949	Q8N653	22	0.01815030664035804	0.08865242295039952	-0.2249339402420059	0.9240432445284184	0.00919534734119961	0.977931773409722
ENSG00000099954_Q9BXF3-3	ENSG00000099954	Q9BXF3-3	22	0.2141417371247306	0.43592156320217496	0.11938422813904875	0.026266755064342867	0.21189125180433285	0.17768197776365408
ENSG00000099956_Q12824	ENSG00000099956	Q12824	22	0.3081455527930971	0.5400005745350677	-0.09805510565830396	0.4689727564121211	-0.06975783721124892	0.7598511247643599
ENSG00000099968_Q9BXK5	ENSG00000099968	Q9BXK5	22	0.758654491607239	0.8828207575921857	0.02962697412625968	0.5761265475787078	-0.05388023002324968	0.825703105129819
ENSG00000099977_P30046	ENSG00000099977	P30046	22	0.4375862576211561	0.663183133556504	0.07476538450304925	0.8308855736465247	0.020595829230096875	0.9440675744554163
ENSG00000099991_Q9Y6J0	ENSG00000099991	Q9Y6J0	22	0.2543741649557025	0.48552586170363815	-0.10959889095170827	0.044922930520198114	-0.19161831735781545	0.24218585229602194
ENSG00000099995_Q15459	ENSG00000099995	Q15459	22	0.008066662858950639	0.049790698943926105	-0.25139910480373323	0.7415113573943866	0.03180558129244148	0.9038178624033166
ENSG00000100023_Q13356	ENSG00000100023	Q13356	22	0.4291497235987992	0.6566511019048163	0.07614559351663694	0.06334697706919068	-0.17765244469039507	0.29006485711596536
ENSG00000100028_P62318-2	ENSG00000100028	P62318-2	22	0.2696748333492056	0.5037466071957384	0.10615930492911227	0.14120566166737575	-0.14119360245434534	0.4454776876442825
ENSG00000100029_O00541	ENSG00000100029	O00541	22	0.4919075889507927	0.7083961300302959	0.06621380942050406	0.5199118142911332	-0.06200275585735963	0.7907300765311014
ENSG00000100030_P28482	ENSG00000100030	P28482	22	0.4482257838843301	0.6717554627175849	-0.07304610598000542	0.01596962687583714	0.2292967071299863	0.13417066074426248
ENSG00000100033_A0A087WWM6	ENSG00000100033	A0A087WWM6	22	0.039575410165562264	0.14747660199931584	0.1965638738670806	0.3935761512523162	0.08214544990327725	0.7073309359619997
ENSG00000100034_P49593	ENSG00000100034	P49593	22	0.02371718217895626	0.10709076914019094	-0.2155633490262944	0.04085825419712854	-0.19532880527731936	0.2299982217810241
ENSG00000100038_O95985	ENSG00000100038	O95985	22	0.007761892200576627	0.04820743832416954	-0.2525915456950381	0.031339286383967616	-0.2054079832057452	0.19803376183376628
ENSG00000100056_Q96DF8	ENSG00000100056	Q96DF8	22	0.9848010328994496	0.9918465092874426	-0.0018373560916991555	0.568575308444464	-0.05494836810064101	0.8216526647905034
ENSG00000100075_P53007	ENSG00000100075	P53007	22	0.07143417540768893	0.21777454341083222	-0.17256084344628753	0.01933950820295974	-0.22274253120442195	0.15035059411184476
ENSG00000100083_Q9UJY5	ENSG00000100083	Q9UJY5	22	0.8219888812255305	0.9162322159530327	-0.02169706241084441	0.3027198624614345	-0.09915589612480524	0.6306417687570568
ENSG00000100084_P54198	ENSG00000100084	P54198	22	0.8859008788760637	0.9495575184804843	-0.013838950989844464	0.03662961737606765	-0.19953212763667816	0.2158687478482883
ENSG00000100092_Q9Y3L3	ENSG00000100092	Q9Y3L3	22	0.003389410727134546	0.02687348805556614	0.27704127020862696	0.12044363224691933	0.14893884029539592	0.4061644838201388
ENSG00000100097_P09382	ENSG00000100097	P09382	22	1.4832236394761196e-07	1.010346425385077e-05	0.4759119100177797	5.409990033151965e-05	0.3750638686867211	0.0025862982203262302
ENSG00000100101_V9GYY5	ENSG00000100101	V9GYY5	22	0.5628639367902742	0.7551361394035176	-0.055760696672057394	0.3984992804710534	-0.08129660237069995	0.7112275939666003
ENSG00000100105_Q9HBE1	ENSG00000100105	Q9HBE1	22	0.016228275472304043	0.08139835717897555	-0.22875319850693604	0.017711335329731508	-0.2257742642257264	0.14345031061779553
ENSG00000100106_Q9H2D6-2	ENSG00000100106	Q9H2D6-2	22	0.4365324772347631	0.6622771918660953	-0.07493694875267916	0.6301075315252176	-0.04642195632868945	0.853917674413062
ENSG00000100109_Q9UBB9	ENSG00000100109	Q9UBB9	22	0.7843012240329026	0.8954325853241454	-0.02639497781404239	0.3080942739666578	-0.09806544982671486	0.6354320408983933
ENSG00000100116_O75600	ENSG00000100116	O75600	22	2.174309947945484e-05	0.0006048618320495376	-0.3929387387984629	6.553968090891016e-06	-0.4149860458190411	0.0004998180903600934
ENSG00000100129_Q9Y262	ENSG00000100129	Q9Y262	22	0.15580801001677105	0.35866415096520515	-0.1362506030621052	0.952793326036057	-0.005709615035419722	0.9865191605926914
ENSG00000100138_P55769	ENSG00000100138	P55769	22	0.910077370514194	0.9598667252011323	0.010892610224483509	0.04674810475975938	-0.1900425163142686	0.24762085743724652
ENSG00000100139_Q8N3F8	ENSG00000100139	Q8N3F8	22	0.1445664821683496	0.34109218187116724	-0.1400229488707663	0.017657270887538472	-0.2258790009922636	0.14337937001812232
ENSG00000100147_Q9H6E4	ENSG00000100147	Q9H6E4	22	0.5704435423334946	0.7603113487655562	0.05468348649703583	0.1031627649852514	-0.1562157487358009	0.3744849657773595
ENSG00000100151_Q9NRD5	ENSG00000100151	Q9NRD5	22	0.4186832810125442	0.6478648229639637	-0.07787970629121121	0.0456824518998548	0.1909562236963648	0.24427528119404832
ENSG00000100154_A0A087WW06	ENSG00000100154	A0A087WW06	22	0.001363123250451074	0.013794545992983314	-0.3016332786569925	0.24823175797090535	-0.1110195502313174	0.5771302654820396
ENSG00000100162_B1AHQ6	ENSG00000100162	B1AHQ6	22	0.006095906081661031	0.041038857627335425	-0.2599526017253245	0.8555292838708677	0.017558757115658342	0.9537796039236276
ENSG00000100167_Q9UH03-2	ENSG00000100167	Q9UH03-2	22	0.010276853980847449	0.05908801630366416	-0.2437754808449421	0.8305040949140441	0.02064299337256096	0.9439314438542621
ENSG00000100201_Q92841	ENSG00000100201	Q92841	22	0.2567733700550397	0.4881930670164095	-0.10905038492403027	0.6318551964495718	-0.046185247267160695	0.8540984172647067
ENSG00000100207_Q9UGU0	ENSG00000100207	Q9UGU0	22	0.22343708993860664	0.44560686674226674	-0.11701576740963784	0.5336758459345039	-0.059975625590620286	0.798581515780526
ENSG00000100209_Q8IWL3	ENSG00000100209	Q8IWL3	22	0.1904181740136278	0.40490179469907395	0.12578137934909595	0.9606541632669238	0.004758015066251555	0.989540210626775
ENSG00000100216_Q9NS69	ENSG00000100216	Q9NS69	22	0.32363080288032897	0.5571198739801315	-0.0949811105764068	0.8983534015855316	-0.01231996748167721	0.9688884653297211
ENSG00000100220_Q9Y3I0	ENSG00000100220	Q9Y3I0	22	0.08642180827483296	0.24750549521748047	-0.16424311336614608	0.5507797832384512	-0.05749250424608919	0.8098010188769704
ENSG00000100225_Q9Y3I1	ENSG00000100225	Q9Y3I1	22	0.08588800543754725	0.24631078064593112	-0.164518696188311	0.6374263894790961	-0.04543249075651963	0.8556901615681244
ENSG00000100226_O00178	ENSG00000100226	O00178	22	0.12427426575450183	0.31219115834808253	-0.14743670751470814	0.09376475546887546	0.16058307171514138	0.3527052398905556
ENSG00000100227_Q9BY77	ENSG00000100227	Q9BY77	22	0.9922332059998428	0.995848757922846	0.0009388623148047686	0.21047298386882252	-0.12033913124067093	0.5378101055698752
ENSG00000100239_O75170-4	ENSG00000100239	O75170-4	22	0.012745520849222723	0.06891613233372501	-0.2368056250233969	0.2279898326760823	-0.11588105691321382	0.5574438427950318
ENSG00000100241_O95248-4	ENSG00000100241	O95248-4	22	0.08126661675936987	0.23757453491952385	-0.16696351304852822	0.8044892159642626	0.02387148402963965	0.934421660691591
ENSG00000100242_Q9UH99	ENSG00000100242	Q9UH99	22	0.09504040627541703	0.26250966024721517	-0.15997057643192905	0.02288299657364266	-0.2168382227249944	0.16415282872424958
ENSG00000100243_P00387-3	ENSG00000100243	P00387-3	22	0.0369056050303456	0.14113647511820646	0.1992456992295128	0.9413718356062164	0.007093254810090816	0.9823143800119599
ENSG00000100258_Q9BU23-2	ENSG00000100258	Q9BU23-2	22	0.03968389623630821	0.14777625519457113	0.19645814200242215	0.2965790488293426	-0.100417500074857	0.6251931765129576
ENSG00000100266_Q9UNF0	ENSG00000100266	Q9UNF0	22	0.02934653111238237	0.12206846657711248	0.20784053912551986	0.07437755402390922	0.17082341995122027	0.3138279810524832
ENSG00000100280_Q10567-2	ENSG00000100280	Q10567-2	22	0.08138980304271602	0.23782490879871124	-0.16689692082834046	0.5271434940838977	-0.06093437042084894	0.7936561835916159
ENSG00000100281_Q9UGU5	ENSG00000100281	Q9UGU5	22	0.022466046408432454	0.10261168276670483	-0.2174904264883112	0.8836004633161834	0.01411992001799741	0.9645937025347671
ENSG00000100284_O60784	ENSG00000100284	O60784	22	0.17529264691903218	0.38571688719418856	-0.1301679870402717	0.05319694607864709	-0.184854458475762	0.26437520293236094
ENSG00000100292_P09601	ENSG00000100292	P09601	22	0.3054684340433195	0.5376889496150122	0.09859665425310543	0.6072056329613896	-0.049550210845585065	0.8410290345406838
ENSG00000100294_Q8IVS2	ENSG00000100294	Q8IVS2	22	0.3991098707165315	0.6313011313331403	-0.08119175989400748	0.2396656332958435	-0.11304189275750452	0.5677881139990943
ENSG00000100296_Q13769	ENSG00000100296	Q13769	22	0.01287540723219264	0.06935859253056154	-0.2364726945148315	0.014690236475663131	-0.2321030270992965	0.12665633225181427
ENSG00000100297_P33992	ENSG00000100297	P33992	22	0.6632289216481803	0.8272406415911049	-0.04198068912514117	0.4762283298592878	-0.06862676720851213	0.7652542409769195
ENSG00000100299_A0A0C4DFZ2	ENSG00000100299	A0A0C4DFZ2	22	0.2234316880334991	0.44560686674226674	-0.11701712339392352	0.7340421692953133	0.032759758634179216	0.9008436932701307
ENSG00000100304_Q14166	ENSG00000100304	Q14166	22	0.03265236241099927	0.1303581389319334	-0.20387573026061886	0.048604819230828315	-0.1884910224111723	0.25240619166888517
ENSG00000100316_P39023	ENSG00000100316	P39023	22	0.3224393864325488	0.5559531522924881	0.095214201379715	0.5033341452174669	0.06448090760554304	0.7788305638316649
ENSG00000100320_O43251-6	ENSG00000100320	O43251-6	22	0.03708291309221589	0.1415182255657757	-0.19906263110894068	0.9918367666377801	-0.000986786139269737	0.9979075607201088
ENSG00000100324_Q15750	ENSG00000100324	Q15750	22	0.11068010134448844	0.2902750679473375	0.1529418958542773	0.06988334881762935	0.17349964635100054	0.304469840826585
ENSG00000100325_Q9H1I8	ENSG00000100325	Q9H1I8	22	0.025979941013040637	0.11374079220291115	0.2122887581972052	0.32150174215072824	0.09539803359561497	0.6444778998997794
ENSG00000100330_Q13615-3	ENSG00000100330	Q13615-3	22	0.19376375848353491	0.40943742828325336	-0.12484565304359745	0.4929160433568806	0.06606002525584605	0.7740223750561093
ENSG00000100335_B0QY95	ENSG00000100335	B0QY95	22	0.001471974479082616	0.014528859612440354	-0.2996399073702816	0.005378688442447953	-0.2636881550828987	0.06827029200261271
ENSG00000100345_P35579	ENSG00000100345	P35579	22	0.12164559360068747	0.30792442851013335	-0.14846359121269667	0.9287421581990252	0.008624948151222445	0.9779450208209611
ENSG00000100347_Q9Y512	ENSG00000100347	Q9Y512	22	0.6368236804121261	0.8096082712042583	0.04551379371187074	0.11791561463869565	-0.14995048180928836	0.400876837988919
ENSG00000100348_Q99757	ENSG00000100348	Q99757	22	0.44420983265943015	0.668834901218702	0.07369232774464855	0.2891173592148781	0.10197389138731268	0.6175894263646862
ENSG00000100353_O15371-3	ENSG00000100353	O15371-3	22	0.8545875699592186	0.934543803848032	0.017674479369185928	0.7429480060139316	0.031622406286300406	0.9039553516667135
ENSG00000100354_Q9UPQ9	ENSG00000100354	Q9UPQ9	22	0.5137751187866023	0.7219976436364519	-0.06291531115226244	0.01399775856629562	0.2337117668964729	0.12316839456363177
ENSG00000100360_Q9BW83	ENSG00000100360	Q9BW83	22	0.6108790033169474	0.7910708270672245	-0.04904505519292216	0.8631289878216497	0.016625766828250954	0.955122524785885
ENSG00000100362_P20472	ENSG00000100362	P20472	22	0.2459416713786855	0.4731371054309057	0.1115554159184231	0.08797945257138877	0.16344663184887032	0.3440759298976291
ENSG00000100364_Q6ICG6	ENSG00000100364	Q6ICG6	22	0.11451063455443115	0.29657598933046664	0.15133992919191666	0.05721989816033673	0.18187542098466686	0.2743433291066198
ENSG00000100376_Q9NWS6	ENSG00000100376	Q9NWS6	22	0.8561521997374394	0.9349636589099601	-0.017482223980245033	0.4264982980560725	-0.07658256428063948	0.7331904336257085
ENSG00000100380_P50502	ENSG00000100380	P50502	22	0.33780476839493434	0.5702086884577429	-0.09224926092567744	0.3957218120296424	0.08177472144964787	0.7088909194244656
ENSG00000100387_P62877	ENSG00000100387	P62877	22	0.03889735048502787	0.14579687064704064	0.19723027192446985	0.8152596631111572	0.02253185527957721	0.9388016181718628
ENSG00000100393_Q09472	ENSG00000100393	Q09472	22	0.5159256126090723	0.7230948574952375	-0.0625948918692639	0.2419987917442261	-0.11248616796497264	0.5699655533166422
ENSG00000100395_Q969R5	ENSG00000100395	Q969R5	22	0.17367159678727262	0.38308132508613235	0.13065437035520014	0.06430371062443664	0.17702345381670073	0.2927715495807684
ENSG00000100401_P46060	ENSG00000100401	P46060	22	0.7382785218767426	0.8712734063084434	-0.03221818857972692	0.02920860717432571	0.2080140325557136	0.18861929189388155
ENSG00000100403_Q9UGR2-2	ENSG00000100403	Q9UGR2-2	22	0.16274164464885302	0.368466161133125	0.13402451605860047	0.7397001484173438	0.03203667491145501	0.9031490950163693
ENSG00000100410_Q7RTV0	ENSG00000100410	Q7RTV0	22	0.27740652905805746	0.5096781791133393	-0.10447139506868837	0.7101931449608184	-0.03582825984725529	0.8952208317592449
ENSG00000100412_A2A274	ENSG00000100412	A2A274	22	0.02866554750202115	0.12097710181153694	-0.20870397302083815	0.021645919128538072	-0.2188041633128469	0.16030492247099987
ENSG00000100413_Q9Y535	ENSG00000100413	Q9Y535	22	0.06430476219716036	0.20457094623326133	0.17702276667977898	0.5710771819010196	0.05459374058093012	0.8228767035065476
ENSG00000100416_O75648	ENSG00000100416	O75648	22	0.8593792167734705	0.9367894262641849	-0.01708591656889501	0.3814976978156402	-0.08425532124506359	0.6968560741964617
ENSG00000100417_Q92871	ENSG00000100417	Q92871	22	0.01898056639610361	0.09126241772323442	0.2233914362554548	0.6038513878693585	0.050012657119922484	0.8393369924291155
ENSG00000100425_O95696	ENSG00000100425	O95696	22	0.027173472251862868	0.11709932508600719	-0.2106584624649362	0.04866088771637109	-0.1884449399705979	0.25240619166888517
ENSG00000100439_Q8TB40	ENSG00000100439	Q8TB40	14	0.06587507559857159	0.20690064646353543	0.17600671644152616	0.2459493498654139	0.11155361345378673	0.5752083463530308
ENSG00000100441_O15037	ENSG00000100441	O15037	14	0.7480066899391128	0.8767687866348794	-0.030978306277731425	0.17707047787265467	0.1296383525299998	0.4943390962725523
ENSG00000100442_Q00688	ENSG00000100442	Q00688	14	0.8931739603867334	0.9532104176297095	-0.012951378719028944	0.5912289713809203	-0.051763243288974026	0.8313203710831278
ENSG00000100445_Q9NRG7-2	ENSG00000100445	Q9NRG7-2	14	0.7880903098229498	0.8969730709177842	-0.025920033619645712	0.5744346275830151	-0.05411898348152356	0.824820004943781
ENSG00000100461_Q86U06-4	ENSG00000100461	Q86U06-4	14	0.6800550150540298	0.8371901738352414	0.039758283694370115	0.15173459545230775	0.13759315070379788	0.4593628631698882
ENSG00000100462_O14744	ENSG00000100462	O14744	14	0.25412544741291554	0.48534359643075664	-0.10965595532726237	0.9802775344797904	0.00238428506532631	0.9950337325110977
ENSG00000100479_P56282	ENSG00000100479	P56282	14	0.1415626193060458	0.3375993640403301	-0.14106827081217052	0.052062432391091436	-0.18572804046940414	0.2605562046072904
ENSG00000100504_P06737-2	ENSG00000100504	P06737-2	14	0.18653306999863584	0.4000294510634252	-0.12688310806629516	0.9196119507441324	-0.009733550651606741	0.9761790884826663
ENSG00000100519_A0A087X2I1	ENSG00000100519	A0A087X2I1	14	0.5064059441683667	0.7162495325533831	-0.06401856875772087	0.8643309987016335	-0.016478342619093624	0.9557641304639054
ENSG00000100522_Q96EK6	ENSG00000100522	Q96EK6	14	0.6010732663994648	0.783671040911095	-0.05039653576169305	0.5814122561286903	0.05313643287334432	0.8277668267106351
ENSG00000100523_Q8NEL9	ENSG00000100523	Q8NEL9	14	0.1053755694849844	0.2802494679627944	-0.1552332039094854	0.8092056613790521	0.02328430811187664	0.9363290362347263
ENSG00000100554_Q9Y5K8	ENSG00000100554	Q9Y5K8	14	0.2958147618391519	0.5279390280131632	-0.10057571942799733	0.08788061513911258	0.16349683634164747	0.3440759298976291
ENSG00000100567_P25788-2	ENSG00000100567	P25788-2	14	0.5979696165009442	0.7819030355208884	0.050826331380538096	0.5665909783083322	0.05523015971171564	0.8211723545346551
ENSG00000100568_Q9UEU0	ENSG00000100568	Q9UEU0	14	0.5174494711726758	0.7239492932594748	-0.062368253490049035	0.34092172200247395	-0.09165833007990763	0.6606002877035234
ENSG00000100575_Q9Y5J7	ENSG00000100575	Q9Y5J7	14	0.9158983031834256	0.9625214553432201	-0.010184821784330287	0.4240141955214129	-0.07699337858943286	0.7309566567573119
ENSG00000100577_G3V5T0	ENSG00000100577	G3V5T0	14	0.3721173282959233	0.6029062083771545	0.08592191581907117	0.4340832000818869	0.07533662317617408	0.7367996449267519
ENSG00000100578_Q9BVV6	ENSG00000100578	Q9BVV6	14	7.337490709747972e-07	3.9405343783383617e-05	-0.4516241088722253	0.047927164810726015	-0.18905149412801392	0.2508344916482932
ENSG00000100580_Q6PL24	ENSG00000100580	Q6PL24	14	0.8373457016159751	0.9247881833572528	-0.01979785891737064	0.9512391396988356	0.005897820327275614	0.9860288042556886
ENSG00000100591_O95433	ENSG00000100591	O95433	14	0.08760529271238959	0.2488900277030499	0.16363692357457787	0.9974215488481204	-0.00031168292529777365	0.998764956067151
ENSG00000100592_Q9Y4D1	ENSG00000100592	Q9Y4D1	14	0.29324156765484605	0.5258096040456975	0.10111040403873718	0.02531708459912901	0.21322195100994795	0.17364158880301972
ENSG00000100596_O15270	ENSG00000100596	O15270	14	0.8566594516951939	0.9351951794742467	0.017419909648727618	0.22037609389421314	0.11778787586042393	0.5483924801448716
ENSG00000100600_Q99538	ENSG00000100600	Q99538	14	0.09698372268707486	0.26585542328975303	-0.1590498680759314	0.3350715382210769	0.09277029173439934	0.6552811053847667
ENSG00000100601_Q13686	ENSG00000100601	Q13686	14	0.11105841773688596	0.2904785962398689	0.15278177849490288	0.7411555389931095	0.03185096618571203	0.9038178624033166
ENSG00000100603_Q13573	ENSG00000100603	Q13573	14	0.09048131337545093	0.2536482453354903	0.16219048955640952	0.490111642105282	-0.06648809594504218	0.7738070036692866
ENSG00000100605_Q13572	ENSG00000100605	Q13572	14	0.010834678868992292	0.06133841879809309	-0.24208146565364302	0.2488447771865761	-0.11087668694810356	0.577592952704614
ENSG00000100612_Q9Y394-2	ENSG00000100612	Q9Y394-2	14	0.009700462908770087	0.05662335368746962	-0.2456128686730498	0.2813219504147153	-0.10362866502640246	0.6102771467513263
ENSG00000100614_P35813	ENSG00000100614	P35813	14	0.0013318278016728126	0.01352104026217511	-0.302233189307396	0.1630113006765648	-0.13393938070862016	0.4776256592630909
ENSG00000100625_Q9UIU6	ENSG00000100625	Q9UIU6	14	5.324699853627452e-06	0.00019959747676171543	-0.4186512780983207	5.249942539407986e-07	-0.4568674925189027	5.7984710185254415e-05
ENSG00000100632_P84090	ENSG00000100632	P84090	14	0.4537978517375923	0.6769035532746991	0.07215482805741866	0.16518202190524767	-0.13325782873288436	0.4803234427193522
ENSG00000100650_Q13243	ENSG00000100650	Q13243	14	0.9290389541901	0.9683221083899775	0.00858893040079445	0.0920508652190946	-0.16141644686638645	0.3494908678947503
ENSG00000100664_P55010	ENSG00000100664	P55010	14	0.8456555760434855	0.9300743184436598	0.018773357899692613	0.2122083988483728	-0.11988597202694327	0.539651723109834
ENSG00000100697_Q9UPY3	ENSG00000100697	Q9UPY3	14	0.028923757465216863	0.12097710181153694	-0.208374554389865	0.3313950273358864	-0.09347541560782097	0.6532761819598979
ENSG00000100711_Q9BQ24-2	ENSG00000100711	Q9BQ24-2	14	0.7484712862070131	0.8767687866348794	-0.030919220016887093	0.6670906940891539	0.041468715140752496	0.8705200624027541
ENSG00000100714_P11586	ENSG00000100714	P11586	14	0.0673715745798149	0.20942465985500536	-0.17505658221639606	0.0858271942625011	-0.16455017726794496	0.339419460314785
ENSG00000100722_Q6PJT7-2	ENSG00000100722	Q6PJT7-2	14	0.11627642550436665	0.299923108945506	0.15061543867270633	0.16845765737762772	-0.13224183268384934	0.4834855524915247
ENSG00000100726_Q9Y4R8	ENSG00000100726	Q9Y4R8	16	0.3843798214302868	0.615843745260715	0.0837482593184474	0.2982288226875878	-0.10007688540371064	0.6261730049612217
ENSG00000100744_Q9P0R6	ENSG00000100744	Q9P0R6	14	0.060477947218511414	0.19617398649732196	-0.17958625836611358	0.508905870291137	-0.06364337548591056	0.7816187265686239
ENSG00000100749_Q99986	ENSG00000100749	Q99986	14	0.9174363636219148	0.9630783114485078	0.009997895249676021	0.2994205730505381	0.09983160625912348	0.6274413447699533
ENSG00000100764_P62191	ENSG00000100764	P62191	14	0.8473567278427993	0.9311370114282971	0.01856388881021161	0.5187724328883483	0.062171769942220026	0.789901670209195
ENSG00000100796_Q6IN85	ENSG00000100796	Q6IN85	14	0.2456578012196176	0.4729589530314528	-0.11162207953918404	0.8655101213725506	-0.01633376249062069	0.9566007311098274
ENSG00000100804_P28074	ENSG00000100804	P28074	14	0.541985109245396	0.7415792783273203	0.05876448785477228	0.13038242759981006	-0.14511349120858585	0.42592036267434125
ENSG00000100811_P25490	ENSG00000100811	P25490	14	0.07997608363342243	0.23532908907015126	-0.16766605466595327	0.09364806706457332	-0.1606394270810509	0.35247327709498044
ENSG00000100813_E7EQT4	ENSG00000100813	E7EQT4	14	0.8309342580118944	0.9210793568688278	-0.02058981048591005	0.1527159147333755	-0.1372672717191127	0.461243823565301
ENSG00000100815_Q15643	ENSG00000100815	Q15643	14	0.8937682675881826	0.9535234043737179	0.012878901080131566	0.008054804642741678	0.2514447512549267	0.08760454760849438
ENSG00000100823_P27695	ENSG00000100823	P27695	14	0.1654569827213574	0.3723732869243918	-0.1331719733853794	0.028117452313143197	-0.2094116576525223	0.18398406488048552
ENSG00000100852_Q13017-2	ENSG00000100852	Q13017-2	14	0.2555709167197571	0.4866075605778046	-0.10932484860389778	0.1904216306982559	0.12578040641767618	0.5123328417098928
ENSG00000100865_Q9BW66	ENSG00000100865	Q9BW66	14	0.5410754542638238	0.7413299824812762	0.05889662745714781	0.8112385895844233	-0.023031481435850355	0.9372036798697593
ENSG00000100883_P61011	ENSG00000100883	P61011	14	0.017708496052696046	0.08712776522922785	0.2257797577593389	0.8754721277794589	-0.01511366531165727	0.9608145366721285
ENSG00000100888_Q9HCK8	ENSG00000100888	Q9HCK8	14	0.5025537666806836	0.7140144726005041	-0.06459859664016444	0.5050156138721468	-0.06422764740414412	0.7799016892766597
ENSG00000100889_Q16822	ENSG00000100889	Q16822	14	0.041656336942142366	0.15183710847437967	0.19457670402642854	0.8021871258241295	-0.024158399731237342	0.9335002345645698
ENSG00000100897_Q8TEB1	ENSG00000100897	Q8TEB1	14	0.8015925549633843	0.9045402272342429	0.024232536886595508	0.4709475708070061	0.0694490475652656	0.7618409440883034
ENSG00000100902_P60900	ENSG00000100902	P60900	14	0.3613343258095878	0.5937621670914417	0.08786977463518984	0.2418576294661292	0.11251968481162734	0.5699655533166422
ENSG00000100911_A0A087X1Z3	ENSG00000100911	A0A087X1Z3	14	0.24410965754420744	0.4706131103294443	-0.11198658402172336	0.4507860954093694	0.07263580893044967	0.7504688205050439
ENSG00000100916_Q5PSV4-2	ENSG00000100916	Q5PSV4-2	14	1.1257726369302006e-05	0.0003620187642108031	-0.4052331210357696	0.3322884943085516	-0.09330359992937036	0.653600554138605
ENSG00000100934_Q15436	ENSG00000100934	Q15436	14	0.9280669700323227	0.9682821497184054	-0.00870689020362605	0.025931901948773692	0.21235570271388066	0.17672315306791944
ENSG00000100938_H0YNJ6	ENSG00000100938	H0YNJ6	14	0.4021623702995325	0.6338793976711328	-0.08066904588898627	0.22766096887609166	-0.11596248491214572	0.556852297296771
ENSG00000100941_Q9H307	ENSG00000100941	Q9H307	14	0.7157297333804056	0.8595540968653781	-0.035112817737885674	0.020216062251988725	-0.221200433426208	0.1548091510584424
ENSG00000100949_Q92696	ENSG00000100949	Q92696	14	0.7102750491815186	0.8569029745447855	-0.0358176620221248	0.7231089624375102	-0.034162217328469933	0.8997085412785741
ENSG00000100979_P55058-2	ENSG00000100979	P55058-2	20	0.00048663015632972336	0.006395854855495431	-0.32710743426718064	0.16378856343464826	-0.1336945690572209	0.47866311011056417
ENSG00000100982_Q9H4Z3	ENSG00000100982	Q9H4Z3	20	0.9219607485843534	0.9658709016507158	0.009448240956428577	0.8268992161338486	0.021088924887158564	0.9427487750696827
ENSG00000100983_P48637	ENSG00000100983	P48637	20	0.012431312703025315	0.06777312045926452	-0.2376234309591512	0.408870765194942	-0.07952846737429979	0.7188709323723027
ENSG00000100991_Q8TEL6-3	ENSG00000100991	Q8TEL6-3	20	0.8967238201062533	0.9544572114444474	-0.012518567818474612	0.2868886032927373	-0.10244393460793688	0.6157373144320021
ENSG00000100994_P11216	ENSG00000100994	P11216	20	0.5415446679407366	0.7414341228121685	0.05882845422506468	0.0057528555651266714	0.2616875922739766	0.07087075528884895
ENSG00000100997_Q8N2K0	ENSG00000100997	Q8N2K0	20	0.002385261036636445	0.020614376713479605	-0.28678406231517345	0.04515381171493298	-0.1914160744541391	0.24266385725323883
ENSG00000101003_Q14691	ENSG00000101003	Q14691	20	0.4800187036521937	0.6980988263628666	-0.06803959375355899	0.7344813706599925	0.032703564569644905	0.9008436932701307
ENSG00000101004_Q9Y2I6	ENSG00000101004	Q9Y2I6	20	0.002314077794576116	0.020204792401176352	-0.2876084625932945	0.5280554306088838	0.0608001704114641	0.7943998775156497
ENSG00000101017_P25942	ENSG00000101017	P25942	20	0.15289434179885028	0.35453354879052584	-0.13720818815860608	0.564954996061704	0.05546283409017919	0.8206579829413323
ENSG00000101019_Q9NVA1	ENSG00000101019	Q9NVA1	20	0.07684216976811784	0.22940393283743002	-0.1694107244965961	0.5084867908711841	-0.06370620501497411	0.7816187265686239
ENSG00000101057_P10244	ENSG00000101057	P10244	20	0.22418238031166512	0.4462784492810111	-0.11682890609071594	0.7494746067085769	-0.030791659106032893	0.9080552849909893
ENSG00000101079_Q9UGV2	ENSG00000101079	Q9UGV2	20	6.290915997375533e-05	0.0013196342001117218	-0.3720026793034947	0.002275685609231812	-0.2880626504950756	0.038648920750741986
ENSG00000101098_Q9H426	ENSG00000101098	Q9H426	20	0.8130889025017152	0.911505609157382	-0.02280150154428692	0.7082585978076695	-0.036078701062692516	0.894624072838424
ENSG00000101109_Q13043	ENSG00000101109	Q13043	20	0.041432069274146124	0.1514553715243599	-0.19478682628166935	0.15702776079629854	-0.13585370680586573	0.4683053238645663
ENSG00000101115_Q9UJQ4	ENSG00000101115	Q9UJQ4	20	0.051693358425398295	0.17587402020671225	0.1860156133622365	0.028552034513267887	0.20884958822501545	0.18564773735033918
ENSG00000101126_Q9H2P0	ENSG00000101126	Q9H2P0	20	0.06647213263902994	0.20795109149049615	-0.17562556128580634	0.03498265067741002	-0.2012801286713213	0.20983407426123388
ENSG00000101132_Q9NQP4	ENSG00000101132	Q9NQP4	20	0.8338154602731492	0.9228992541956011	0.020233753581906898	0.25607632703686345	0.10920937961901127	0.585349573606784
ENSG00000101138_Q05048	ENSG00000101138	Q05048	20	0.8497730317906906	0.9324982082788889	-0.01826650855539427	0.8371943048657497	-0.01981654430327128	0.9462009027822853
ENSG00000101146_P78406	ENSG00000101146	P78406	20	0.12776568365156013	0.3176453976681772	0.14609831301604756	0.1506269668666127	0.13796288169584342	0.457530761941103
ENSG00000101150_O43399	ENSG00000101150	O43399	20	0.12883789518310826	0.31919752287250325	0.14569293052148552	0.5718575679007282	0.054483274343172176	0.823588035065662
ENSG00000101150_O43399-2	ENSG00000101150	O43399-2	20	0.12883789518310826	0.31919752287250325	0.14569293052148552	0.2682477330124952	0.10647441607133504	0.5970599211275949
ENSG00000101152_Q9H3Z4	ENSG00000101152	Q9H3Z4	20	0.8466079353046048	0.9306370414982945	-0.01865607969540942	0.060892604621157385	-0.17930219832775604	0.28389391682003773
ENSG00000101160_Q9UBR2	ENSG00000101160	Q9UBR2	20	0.004927743784924239	0.03555496227505132	0.2662709331260012	0.061179043733121566	0.1791068953449088	0.28389391682003773
ENSG00000101161_O94906	ENSG00000101161	O94906	20	0.34426476057585514	0.5758907619352116	-0.09102831594844253	0.016648187569589145	-0.2278865983769534	0.1381448507158898
ENSG00000101182_O14818	ENSG00000101182	O14818	20	0.5483395829474	0.7462365752893189	-0.05784443329598048	0.5371623900272419	0.05946630640407756	0.8009071315481866
ENSG00000101189_Q9NV56	ENSG00000101189	Q9NV56	20	0.00022817421144020718	0.0035074721938368096	-0.3445210187887945	0.041649106004407084	-0.1945834641301608	0.23337955384806966
ENSG00000101191_Q9BTC0	ENSG00000101191	Q9BTC0	20	0.5635661052110496	0.755576403764563	0.05566061720535948	0.5968845012792541	0.050976834186040015	0.8350246031910185
ENSG00000101193_Q9NWU2	ENSG00000101193	Q9NWU2	20	0.9099721179991609	0.9598667252011323	0.010905413474572731	0.4154375741627125	-0.07842255178544727	0.724358492130195
ENSG00000101199_Q8N6T3	ENSG00000101199	Q8N6T3	20	0.3411722777814779	0.5735646656565323	0.09161097674286818	0.16646983245539815	0.13285662548047775	0.4818016491365111
ENSG00000101210_Q05639	ENSG00000101210	Q05639	20	0.09499713030624793	0.26250966024721517	0.15999124832698522	0.08775243261058183	0.16356201360342149	0.3440759298976291
ENSG00000101216_Q9UKD1	ENSG00000101216	Q9UKD1	20	0.7647770481013744	0.885895372444933	0.028852557179036783	0.17299588055406911	-0.13085810137387102	0.4901004170584816
ENSG00000101220_Q9GZN8	ENSG00000101220	Q9GZN8	20	0.7317741870443711	0.8687761384794024	0.033050113173034766	0.4306551785954668	0.07589817434558639	0.7343670862742415
ENSG00000101246_Q13795	ENSG00000101246	Q13795	20	0.0009007058834315508	0.01009906508236969	0.3121516197989219	0.53405680407307	-0.059919894342807214	0.7989449360034798
ENSG00000101265_P50749	ENSG00000101265	P50749	20	0.0005517838146980394	0.0070474807784517745	-0.3241166599225045	0.5251142868341401	-0.061233407296945326	0.7924570407613991
ENSG00000101266_E7EU96	ENSG00000101266	E7EU96	20	0.018133374471916302	0.08865242295039952	-0.22496602637407392	0.7113524182886313	0.0356782977869911	0.895326018651353
ENSG00000101290_O95674	ENSG00000101290	O95674	20	0.3453814004712652	0.5769738200369652	0.09081873779057432	0.8234084131389576	-0.0215211691313523	0.9417436569836987
ENSG00000101294_Q8TCT9-5	ENSG00000101294	Q8TCT9-5	20	0.2022303639555937	0.42087035337013345	0.12252872285752965	0.7966127673184743	0.02485402701062481	0.9308831425469074
ENSG00000101310_Q15437	ENSG00000101310	Q15437	20	0.0579416741388289	0.19048287787726056	-0.1813592532366005	0.6779412203177543	-0.040036309291072734	0.8757595195312632
ENSG00000101311_Q9BQL6	ENSG00000101311	Q9BQL6	20	0.7522708126203953	0.8794308171157418	-0.03043643257156695	0.8326932363845463	-0.020372404599697577	0.9442949515427309
ENSG00000101335_P24844	ENSG00000101335	P24844	20	0.0032970315573282536	0.02637208953999304	0.2778200667270319	0.3395655423366621	0.09191502110115662	0.6595493224968889
ENSG00000101337_A0A0C4DFM1	ENSG00000101337	A0A0C4DFM1	20	0.886163475102214	0.9495575184804843	-0.01380688532085018	0.6137011321625024	-0.04865786283454509	0.8451421147772029
ENSG00000101343_Q5JY65	ENSG00000101343	Q5JY65	20	9.978649623082712e-05	0.0019155983443099693	-0.3624462429582859	0.022716781303549	-0.21709699045900108	0.16384354028252743
ENSG00000101346_Q9H488	ENSG00000101346	Q9H488	20	0.400962711247207	0.6328340615869097	-0.08087419580520497	0.4775652772273914	0.06841937168910361	0.7657780139971638
ENSG00000101347_Q9Y3Z3	ENSG00000101347	Q9Y3Z3	20	0.002582894294697357	0.021758823612909248	0.28460641289703226	0.00010185795179882885	0.3620135784667458	0.0040277903655759105
ENSG00000101350_O15066	ENSG00000101350	O15066	20	0.2095662635602342	0.43019135628144234	-0.12057695879713574	0.9717649709519812	-0.003413744414665007	0.9922101376981817
ENSG00000101361_O00567	ENSG00000101361	O00567	20	0.7890567002542057	0.8974814024434302	-0.025799000740443483	0.08405596353558502	-0.1654750168185891	0.33611891536139676
ENSG00000101363_Q9NQG1	ENSG00000101363	Q9NQG1	20	0.20383589212449124	0.42295584313142076	0.1220972761751669	0.006635915101084403	-0.25738966178058603	0.07799939841751685
ENSG00000101365_A0A087WZN1	ENSG00000101365	A0A087WZN1	20	0.009017567077432669	0.05348903317934078	-0.2479183020684723	0.026971566980219828	0.2109299116275388	0.17941833652677902
ENSG00000101367_Q15691	ENSG00000101367	Q15691	20	0.6253744082972656	0.8025871068621759	0.04706441998495455	0.1624873139243164	0.13410490912625436	0.4768180178649431
ENSG00000101384_P78504	ENSG00000101384	P78504	20	0.042645702200300034	0.15455407519387912	0.19366086105095334	0.24450023381527936	0.11189447379387377	0.5731571304693327
ENSG00000101391_Q96SZ6-3	ENSG00000101391	Q96SZ6-3	20	0.587962847361421	0.7740533329248965	0.05221895360722517	0.4145609058260498	0.07856959788349023	0.7234206381698924
ENSG00000101407_O43156	ENSG00000101407	O43156	20	0.0010080794493838702	0.011067908686043012	-0.3093305323522901	0.23217890998895704	-0.11485096390470614	0.5608681358201013
ENSG00000101413_Q9NQG5	ENSG00000101413	Q9NQG5	20	0.006160801019526368	0.041387777792894535	-0.2596341879775546	0.08006433151976225	-0.16761772610264608	0.32772658639974245
ENSG00000101421_Q9H444	ENSG00000101421	Q9H444	20	6.42574917942246e-06	0.00023261212029509308	0.415336531947928	0.0016140291150954472	0.2972309324171613	0.030680921398520578
ENSG00000101442_Q9H9F9	ENSG00000101442	Q9H9F9	20	0.2572784573579476	0.4886207292432045	0.10893535963108199	0.3848727750816533	-0.08366176240361499	0.699713653334063
ENSG00000101444_P23526	ENSG00000101444	P23526	20	0.930802043477734	0.9692029824838009	-0.008374994444534009	0.3634444987451231	0.08748580178031541	0.6827640642115127
ENSG00000101447_Q9H4H8	ENSG00000101447	Q9H4H8	20	0.029590964999486682	0.12292377919458893	-0.2075347596074878	0.6560602525975588	0.042934194357981466	0.8652917393740913
ENSG00000101452_Q9H5Z1	ENSG00000101452	Q9H5Z1	20	0.3214505883063072	0.5548745168720588	-0.09540807261303214	0.9276461248205996	-0.008757967868554935	0.9779450208209611
ENSG00000101457_Q9H147	ENSG00000101457	Q9H147	20	0.561551004292309	0.7548112905138504	-0.055947987387509016	0.6125405005914647	-0.04881700578261913	0.844054771176131
ENSG00000101464_Q9H490-2	ENSG00000101464	Q9H490-2	20	0.03599307828872736	0.1387406605880876	-0.2001997251837384	0.022769806813765985	-0.21701426344346605	0.16384354028252743
ENSG00000101473_O14734	ENSG00000101473	O14734	20	0.027058280195591464	0.11684676553447301	0.2108131199097485	0.9926038480241728	-0.0008940572248891342	0.9979075607201088
ENSG00000101474_Q9HDC9	ENSG00000101474	Q9HDC9	20	0.5647988248920482	0.7562884285967292	0.05548506191037261	0.14226666646907196	-0.14082177240691546	0.4468801348477195
ENSG00000101493_Q92618	ENSG00000101493	Q92618	18	0.00393701411761941	0.03015838504851144	-0.2727816526103393	0.3285560678119466	-0.09402332320291737	0.6503837506940177
ENSG00000101544_Q6IQ32	ENSG00000101544	Q6IQ32	18	0.3232968694038472	0.5566962945565023	-0.09504638619275417	0.18689503987070932	-0.12677976000957092	0.5094679257071335
ENSG00000101546_Q8N0V3	ENSG00000101546	Q8N0V3	18	0.2924009859593204	0.5247479450573073	0.10128574084273746	0.8225257371005231	-0.02163053260776	0.9417436569836987
ENSG00000101557_P54578	ENSG00000101557	P54578	18	0.6808581500178615	0.8371901738352414	-0.039652733647011225	0.9557882003839452	0.0053470084432613064	0.9880231098369457
ENSG00000101558_Q9P0L0	ENSG00000101558	Q9P0L0	18	0.8340328698137043	0.9228992541956011	0.020206897361239116	0.9649225674490828	-0.004241497060138202	0.9902597663085226
ENSG00000101596_A6NHR9	ENSG00000101596	A6NHR9	18	0.031408642828216066	0.12726064414456936	-0.20532570473694192	0.7982315884264616	-0.024651883547114558	0.9316047821072018
ENSG00000101624_Q8TAP6	ENSG00000101624	Q8TAP6	18	0.0006376551514095963	0.007838445121876052	-0.320635695725062	0.18786888612371866	-0.12650243337624198	0.5096732243386441
ENSG00000101639_Q8TEP8-3	ENSG00000101639	Q8TEP8-3	18	0.028813718832083293	0.12097710181153694	-0.20851463276015372	0.7329773682021963	0.03289604131306869	0.9008436932701307
ENSG00000101654_O43148	ENSG00000101654	O43148	18	0.9622541376719196	0.9826910496552661	0.004564387775388648	0.921221294847782	0.009538053876682816	0.9765353597934678
ENSG00000101680_P25391	ENSG00000101680	P25391	18	0.003066692903790341	0.024811621386349694	-0.2798508072355752	0.00033786153733225964	-0.33562389831064343	0.01002009725995581
ENSG00000101751_Q9UNA4	ENSG00000101751	Q9UNA4	18	0.6096425613669167	0.7899565315961123	-0.04921493947317519	0.4971984130675143	0.06540882750559758	0.7765958180543536
ENSG00000101752_Q86YT6	ENSG00000101752	Q86YT6	18	0.06594912533859043	0.20692803814758315	-0.17595929175001876	0.5325129196006241	0.06014587553932964	0.7983331998505963
ENSG00000101811_E7EWR4	ENSG00000101811	E7EWR4	X	0.006921505260208631	0.0444703203077299	0.2561081594259725	0.3064625817527656	0.09839518971736956	0.634540578249081
ENSG00000101843_O75832	ENSG00000101843	O75832	X	8.2802350708910125e-19	4.3712740978412135e-16	0.7195798814408169	1.0818035902704413e-13	0.6337196532704011	1.2930215207560664e-10
ENSG00000101849_O60907-2	ENSG00000101849	O60907-2	X	0.0001431530305523317	0.0025075282479806904	0.3547554880687279	0.14716046306132186	0.1391333898522747	0.45431803680521826
ENSG00000101850_P51810	ENSG00000101850	P51810	X	0.0008417629154171392	0.009522442980656388	0.3138337876144245	0.026649150296939	0.2113669890372088	0.17838501233248824
ENSG00000101856_O00264	ENSG00000101856	O00264	X	0.06287899776235065	0.20128269369605425	0.17796293378747613	0.8939011427008114	0.01286269752323441	0.967884882908856
ENSG00000101868_A6NMQ1	ENSG00000101868	A6NMQ1	X	3.896442481213965e-17	1.3713312843605816e-14	0.6946037466085506	1.7707176475121733e-13	0.6294344929147174	1.620459607137569e-10
ENSG00000101871_O15344	ENSG00000101871	O15344	X	0.0027154353924175537	0.02254558743245767	0.2832286864192923	1.1066581623857108e-06	0.4450661616807989	0.00011076956544129473
ENSG00000101882_Q8N5F7	ENSG00000101882	Q8N5F7	X	2.3201381466414866e-06	0.00010206996638176262	0.4328955636261004	0.05081959763973906	0.18670323977681072	0.25714876973157064
ENSG00000101901_Q9NP73	ENSG00000101901	Q9NP73	X	8.260244950408782e-20	5.814294640093294e-17	0.7333405614255435	8.035423619727905e-10	0.5441548493227297	2.0589969483190784e-07
ENSG00000101911_P11908	ENSG00000101911	P11908	X	1.2953159407577428e-15	3.7299211294092273e-13	0.6694354899209997	2.2535779501845139e-10	0.5587172781538591	7.16548337127593e-08
ENSG00000101935_Q9Y4X0	ENSG00000101935	Q9Y4X0	X	4.997159120421168e-08	3.768690836650964e-06	0.4914268062004937	0.00028493930813117146	0.33951799590641263	0.008775582730232136
ENSG00000101940_Q9H1Z4	ENSG00000101940	Q9H1Z4	X	0.143012416282875	0.3395513938623274	0.14056167844975567	0.6274938962935664	0.04677647188509073	0.8523948716905074
ENSG00000101945_O43463	ENSG00000101945	O43463	X	0.6401751348106016	0.8108872942208962	-0.045062099496024605	0.18590106130841075	0.1270639072590428	0.5084894102227495
ENSG00000101966_P98170	ENSG00000101966	P98170	X	8.850367961349533e-05	0.001735822942264684	0.3649607342813391	3.965806406606734e-06	0.4237779242009975	0.00032158171950281945
ENSG00000101972_Q8N3U4-2	ENSG00000101972	Q8N3U4-2	X	4.788380459940731e-12	8.42621950381237e-10	0.5989421602484309	7.903938771943217e-06	0.4116439385047834	0.0005753708156030483
ENSG00000101974_Q8NB49	ENSG00000101974	Q8NB49	X	2.930522586746277e-09	2.900759466724635e-07	0.5285830018425868	4.020201205176315e-07	0.460985776190199	4.6824379855199044e-05
ENSG00000101997_O60826	ENSG00000101997	O60826	X	0.3415320818030161	0.5737066975647498	0.09154301461414242	0.22326070029022813	-0.1170600566318036	0.5517397947374486
ENSG00000102024_P13797	ENSG00000102024	P13797	X	1.6761479591964647e-15	4.616694487612871e-13	0.6674821344540456	3.1465836657692183e-14	0.6441738733377838	5.039253740729403e-11
ENSG00000102030_P41227	ENSG00000102030	P41227	X	0.11772874703686476	0.3017531661876009	0.1500259241960043	0.0022228045368108238	0.2886997117614888	0.03807295685243352
ENSG00000102038_B7ZLQ5	ENSG00000102038	B7ZLQ5	X	1.0471528488559306e-14	2.551428191347046e-12	0.6531603060796456	3.6136036768785013e-06	0.4253788503751915	0.00029677878402671387
ENSG00000102054_Q16576	ENSG00000102054	Q16576	X	5.973216783449152e-17	1.9915962275342306e-14	0.6916669454789659	8.42797806523125e-09	0.5152581709593363	1.420779670680826e-06
ENSG00000102081_Q06787-5	ENSG00000102081	Q06787-5	X	0.1490247391599839	0.34849454506404504	0.1385013455575867	0.018823895782330596	0.22367799136057534	0.1482033575744602
ENSG00000102096_Q9P1W9	ENSG00000102096	Q9P1W9	X	4.25245485415985e-11	6.122568522977874e-09	0.5768089100559252	0.0019302710094930735	0.2924930947126749	0.03505354780151013
ENSG00000102098_Q9UQR0	ENSG00000102098	Q9UQR0	X	0.0011491791076419851	0.012177107839053613	0.3060139930472747	0.016669679925598316	0.2278427544692152	0.1381448507158898
ENSG00000102103_O60828-2	ENSG00000102103	O60828-2	X	3.262131501305639e-06	0.00013332647135981434	0.4271308279876308	0.8137136907930287	0.022723874029294	0.9378946073602871
ENSG00000102119_P50402	ENSG00000102119	P50402	X	5.805963239740543e-07	3.374383222362967e-05	0.4552999740455631	0.0005063887626558602	0.3261633965649472	0.01362994291417412
ENSG00000102144_P00558	ENSG00000102144	P00558	X	0.6088365689527057	0.7893941187710583	0.049325762257548485	0.272302472648477	0.10558204565089364	0.6008851669948825
ENSG00000102158_A0A087WU53	ENSG00000102158	A0A087WU53	X	0.992876117443764	0.9958537456156206	-0.0008611440366908787	0.1490420905465644	-0.1384954909677528	0.45557297500643373
ENSG00000102172_P52788	ENSG00000102172	P52788	X	4.337991088629111e-18	2.113936426651186e-15	0.7091594090137044	7.084724995624358e-11	0.5713866936002676	3.025649888131309e-08
ENSG00000102178_P11441	ENSG00000102178	P11441	X	0.0023289280259417553	0.02029402894682396	0.2874346044242777	0.20012146057321992	0.1230991962116705	0.5234700189595944
ENSG00000102189_Q15075	ENSG00000102189	Q15075	12	0.6069244320930441	0.7880576534721632	0.049588936356923935	0.013795852712009121	0.23419386339395085	0.1220035975920508
ENSG00000102218_O75695	ENSG00000102218	O75695	X	0.002473265854870175	0.02101308137213254	0.2857950073805119	0.05596281274933828	0.18278729893906606	0.27200134937197346
ENSG00000102221_Q92613	ENSG00000102221	Q92613	X	6.97480135614223e-05	0.001429947138872525	0.3698908516517045	0.1708005049784799	0.13152409289846492	0.48715406718261006
ENSG00000102225_Q00536-2	ENSG00000102225	Q00536-2	X	4.917644743578457e-19	2.8321163136881386e-16	0.7227640336417096	7.28986508451362e-05	0.3689822450920087	0.0032504063650739988
ENSG00000102226_G5E9A6	ENSG00000102226	G5E9A6	X	4.747088695696516e-22	7.518201721809358e-19	0.7613286727141859	5.814650704826242e-12	0.5970407129703923	3.3862411286469914e-09
ENSG00000102230_Q9Y5K3	ENSG00000102230	Q9Y5K3	X	4.268810089651789e-12	7.726546262269738e-10	0.6000609576413111	4.4701335997730206e-17	0.6936633614592466	2.8635675840145966e-13
ENSG00000102241_O43719	ENSG00000102241	O43719	X	0.00033727270372545465	0.0047166061326727494	0.33566403038317205	0.020548084593565268	0.22063131486451187	0.15651727693980869
ENSG00000102271_Q9C0H6	ENSG00000102271	Q9C0H6	X	2.552894050924213e-05	0.0006852789751103766	0.3898652746303912	1.2270106387635872e-10	0.5654401547590995	4.6236647952467885e-08
ENSG00000102302_P98174	ENSG00000102302	P98174	X	0.1883524293370244	0.40338493571671724	0.12636512114357773	0.19894397549772225	0.12341959885942448	0.5229150769152263
ENSG00000102309_Q9Y237-2	ENSG00000102309	Q9Y237-2	X	0.1335399454473911	0.325625694537807	0.1439450767834014	0.457235344958681	0.07160802067766955	0.7541391580384349
ENSG00000102316_Q9UNF1	ENSG00000102316	Q9UNF1	X	0.001769616382980405	0.016737574134766023	0.2948039823683713	0.7426097442815385	0.031665525044129485	0.9038178624033166
ENSG00000102317_P98179	ENSG00000102317	P98179	X	0.0015456797044896484	0.015029786126022111	-0.29836488915583403	0.4985813886288206	0.06519915621549872	0.776619267108962
ENSG00000102390_Q9BVG4	ENSG00000102390	Q9BVG4	X	0.430564198645338	0.6577343135804717	0.07591311268645044	0.5749018610792979	0.05405301760861375	0.824820004943781
ENSG00000102393_P06280	ENSG00000102393	P06280	X	0.1154433545987845	0.29813663729017725	0.15095617051034546	0.4412024568917384	0.07417841110786169	0.742992360370262
ENSG00000102401_Q9UH62	ENSG00000102401	Q9UH62	X	0.007651020771319017	0.04773734175752561	0.2530356174718777	0.01209707539410634	0.23851342489773186	0.11396156613918414
ENSG00000102531_Q9Y2H6-2	ENSG00000102531	Q9Y2H6-2	13	1.3363775471723555e-05	0.00041704195868654545	-0.4020766068747035	0.005494479267930521	-0.2630561623364807	0.06863727455141491
ENSG00000102572_Q9Y6E0	ENSG00000102572	Q9Y6E0	13	0.8682235673646301	0.9404719409408783	0.01600118562124259	2.348972069884398e-10	0.5582532876449222	7.16548337127593e-08
ENSG00000102580_Q13217	ENSG00000102580	Q13217	13	0.004918868807502354	0.03555496227505132	0.26632384637845485	0.7306547147085901	-0.03319354060115133	0.900456733825169
ENSG00000102595_Q9NYU1	ENSG00000102595	Q9NYU1	13	0.09245040107516916	0.25811956404195535	0.1612210824823375	0.6342780589915309	-0.04585754113643066	0.8542781274444675
ENSG00000102606_Q14155-5	ENSG00000102606	Q14155-5	13	0.3680290598022797	0.599194061641594	-0.08665629262486169	0.08660353542615143	0.16414960361902628	0.340566143609531
ENSG00000102710_Q8NEM7	ENSG00000102710	Q8NEM7	13	0.6423140587390241	0.8118634401659454	-0.04477433505579798	0.3908163231000023	-0.08262407376214133	0.7048904003469444
ENSG00000102738_Q92665	ENSG00000102738	Q92665	13	0.19470650001726494	0.4108813049997913	0.12458409348429045	0.1104006669420831	-0.15306043657581134	0.3870103065596681
ENSG00000102743_Q9Y619	ENSG00000102743	Q9Y619	13	0.0020473798568805142	0.018449717486967367	-0.2909159114544889	0.3203335147291776	-0.09562755702209123	0.643356689232581
ENSG00000102753_O00505	ENSG00000102753	O00505	13	5.473978420166198e-05	0.0011916719344244972	-0.3748263672646072	0.030970005533149363	-0.20584867765805773	0.1966242373095687
ENSG00000102755_P17948	ENSG00000102755	P17948	13	0.001888304884936664	0.01754019273617854	-0.2930794256251608	0.8617951598314592	-0.016789403012713474	0.9544709187206651
ENSG00000102763_A3KMH1-3	ENSG00000102763	A3KMH1-3	13	0.021284609059926903	0.09883750225000154	-0.2193965320603764	0.02633950384443472	-0.21179101484931173	0.1777473542042426
ENSG00000102781_Q9BW62	ENSG00000102781	Q9BW62	13	0.8949777631295401	0.9542820339802346	-0.012731421386544158	0.3666501089296577	-0.08690512179052087	0.6865713527633402
ENSG00000102786_Q9UL03-3	ENSG00000102786	Q9UL03-3	13	0.27421474817335456	0.507938722128129	-0.105164302446761	0.221873631213082	-0.11740919570978305	0.5500053471128316
ENSG00000102804_Q15714	ENSG00000102804	Q15714	13	0.4960806386523711	0.710515270325085	0.06557851589301869	0.035657468815493004	0.20055571507408546	0.2115016159556002
ENSG00000102805_A0A024R644	ENSG00000102805	A0A024R644	13	0.04092794701189117	0.15074333972112242	-0.1952626411549616	0.7074492009800135	-0.03618355458726878	0.8945755194389986
ENSG00000102858_O60291	ENSG00000102858	O60291	16	0.014142400648984888	0.07392088127996639	0.2333701080127907	0.5485295553318454	-0.057817007909659414	0.8083770539370949
ENSG00000102870_Q9UEG4	ENSG00000102870	Q9UEG4	16	0.17120289205380052	0.379618593335956	-0.13140155337769474	0.25071805937684616	-0.11044161873907422	0.5804480984344331
ENSG00000102879_P31146	ENSG00000102879	P31146	16	0.3567811294936907	0.5885959519121172	0.0887030400294518	0.46731301255589	-0.07001791016606293	0.75941328220016
ENSG00000102882_P27361	ENSG00000102882	P27361	16	0.5536615922501449	0.7491341706332054	0.057077858346128565	0.2273789840238245	0.11603237134155828	0.5568003714283715
ENSG00000102890_Q96BJ8	ENSG00000102890	Q96BJ8	16	0.023061433393220244	0.10495271590951885	0.21656221397438946	0.2847265085829629	0.1029022476600466	0.6143341239415494
ENSG00000102893_Q93100-2	ENSG00000102893	Q93100-2	16	0.8596201741111721	0.9367894262641849	0.017056336283384932	0.0042899579776127785	0.270309648868546	0.05872109146279372
ENSG00000102898_P61970	ENSG00000102898	P61970	16	0.7136152082130933	0.8586424205185084	-0.03538583106214277	0.5941173422726821	0.051361189574708505	0.8337164719822128
ENSG00000102900_Q8N1F7	ENSG00000102900	Q8N1F7	16	0.6684675336296524	0.8295282714091768	-0.041286460301007744	0.5633576578280921	0.055690320842223764	0.8198248877889046
ENSG00000102908_O94916-4	ENSG00000102908	O94916-4	16	0.6205490663651111	0.7988576174401502	0.047721532820555836	0.519307246670483	0.062092412984840514	0.78999815297343
ENSG00000102910_Q86WA8	ENSG00000102910	Q86WA8	16	0.05276752516763287	0.17837901384042382	-0.18518329238607745	0.038248026862298674	-0.1978776119134788	0.22113435025260408
ENSG00000102921_O75113	ENSG00000102921	O75113	16	0.446548390484006	0.6708285638406872	-0.07331562474491936	0.25641453851375245	-0.10913219701548604	0.5855941296681277
ENSG00000102935_Q2M1K9	ENSG00000102935	Q2M1K9	16	0.5544984188723653	0.7499460895722532	-0.056957648078087925	0.07225519193579312	-0.17207048787222756	0.309817108126299
ENSG00000102967_Q02127	ENSG00000102967	Q02127	16	0.6360146641782598	0.8091503798581983	-0.04562297692066879	0.01135739744113808	-0.2405620729208049	0.10957151808423274
ENSG00000102974_P49711	ENSG00000102974	P49711	16	0.014787547128015737	0.07634282531858844	-0.2318822682660656	0.3233289368864105	-0.09504011592437996	0.6458254078717529
ENSG00000102977_A0A0C4DGT6	ENSG00000102977	A0A0C4DGT6	16	0.3753023170126985	0.6065153516008789	0.08535320723463127	0.19996629741125024	-0.12314133948380195	0.5234700189595944
ENSG00000102978_P19387	ENSG00000102978	P19387	16	0.6722530270563979	0.8322525115131182	-0.04078611474928566	0.854535539837489	-0.017680873806466005	0.9528554687900703
ENSG00000102996_P51511	ENSG00000102996	P51511	16	0.024139803480884015	0.10853488648076666	0.21493204437060226	0.7611453567246351	0.029311690168664414	0.9130893549022495
ENSG00000103018_J3KNF8	ENSG00000103018	J3KNF8	16	0.6517287252881867	0.8177265745099352	-0.043512340746247984	0.18254322829965816	-0.12803207871268932	0.5029556647258538
ENSG00000103024_Q13232	ENSG00000103024	Q13232	16	0.11061498939374252	0.2902750679473375	-0.15296949658297535	0.045420832568216565	-0.19118324382941174	0.2434860698175693
ENSG00000103035_P51665	ENSG00000103035	P51665	16	0.7380415872228878	0.8712734063084434	-0.032248451397975726	0.7747853062530834	0.02759057130878057	0.9199085121148494
ENSG00000103037_Q8TBK2-2	ENSG00000103037	Q8TBK2-2	16	0.06475119180190349	0.20457094623326133	-0.17673187547733146	0.5764046722954755	0.05384101402288771	0.8258022272613263
ENSG00000103042_Q9NVC3	ENSG00000103042	Q9NVC3	16	0.5628959356752701	0.7551361394035176	-0.0557561346073589	0.9471313615283172	-0.006395363130338904	0.9846039959174777
ENSG00000103043_Q08AM6	ENSG00000103043	Q08AM6	16	0.1394852457499699	0.33460544516764235	-0.14180105004355606	0.9440357446133364	-0.0067704210278784465	0.9836458316459987
ENSG00000103047_Q9C0B7	ENSG00000103047	Q9C0B7	16	0.9081970566083668	0.9592244670913644	0.011121366308831735	0.8614174611817199	0.016835748337791362	0.9543826109183842
ENSG00000103051_J3KNI1	ENSG00000103051	J3KNI1	16	0.9615597909906691	0.9824969799880466	-0.004648414638256478	0.05052449895365156	0.18693768022551854	0.25654662725197436
ENSG00000103061_Q96CW6	ENSG00000103061	Q96CW6	16	0.024974824278094224	0.11084570547488555	-0.213711985858282	0.391255476821931	-0.08254777845134814	0.7052286394263619
ENSG00000103066_Q8NCC3	ENSG00000103066	Q8NCC3	16	0.08201124375741875	0.2390893829743432	0.16656220574893724	0.6600933001469167	0.04239725435943793	0.868316136206199
ENSG00000103067_Q9H6T0-2	ENSG00000103067	Q9H6T0-2	16	0.5039890206231336	0.7145860442362468	-0.06438221903723597	0.4907864277096958	0.06638497675930853	0.7738070036692866
ENSG00000103091_Q6PJI9	ENSG00000103091	Q6PJI9	16	0.4997538711409655	0.7124079148690405	-0.06502163625188831	0.5455504730116959	0.05824761824560619	0.8067585411765327
ENSG00000103111_Q7L1V2	ENSG00000103111	Q7L1V2	16	0.010315420033599086	0.059245862115004724	0.2436557988028998	0.5811727413906476	0.05317006919924823	0.8277668267106351
ENSG00000103150_O95822	ENSG00000103150	O95822	16	0.013842959122060294	0.0729576922115241	0.2340808393649201	0.4503996102050825	-0.07269766063828226	0.7504688205050439
ENSG00000103152_P29372	ENSG00000103152	P29372	16	0.4932288721554631	0.7086878895678973	0.06601235425544869	0.5776134159676933	0.053670681462314684	0.8265168742753396
ENSG00000103160_Q3SXM5	ENSG00000103160	Q3SXM5	16	0.07071333628746547	0.2163056423858492	-0.17299513643630424	0.13881984107187806	-0.14203751728119549	0.44155377342042423
ENSG00000103168_Q15572	ENSG00000103168	Q15572	16	0.7231342444709292	0.8630473697670189	0.03415896614596717	0.31291966555903844	-0.09709692271845613	0.6379223149050204
ENSG00000103187_Q14019	ENSG00000103187	Q14019	16	0.004445712240798914	0.033017100873928625	0.2692761890445011	0.012646932368059	0.237060313637648	0.11640265624969245
ENSG00000103194_Q14694	ENSG00000103194	Q14694	16	0.472571268806973	0.6926744534688046	0.06919568729740676	0.7663457190765273	-0.028654439477822268	0.9160531130339162
ENSG00000103197_H3BMQ0	ENSG00000103197	H3BMQ0	16	0.04441735414584296	0.15879454769408305	-0.1920642191837381	0.3995479357598637	-0.08111659979461322	0.7116694949001722
ENSG00000103202_Q4TT34	ENSG00000103202	Q4TT34	16	0.5578093608563007	0.7520158120929272	-0.056482885391922824	0.6470735720124514	-0.04413541025257328	0.859811927465622
ENSG00000103222_P33527	ENSG00000103222	P33527	16	0.6341229437225339	0.8086088664416772	-0.045878505665142455	0.8203421784532395	-0.021901193551699515	0.9416075963396259
ENSG00000103245_Q9H6Q4	ENSG00000103245	Q9H6Q4	16	0.09889577943605724	0.2691171661200269	-0.1581580597930789	0.3750486344287344	0.08539839641206118	0.6917899074318962
ENSG00000103249_P51798	ENSG00000103249	P51798	16	0.7657258676114708	0.8863280415345637	0.02873271026313832	0.10051641455389172	-0.1574127401475818	0.36773737957294705
ENSG00000103257_Q01650	ENSG00000103257	Q01650	16	0.0510972500409341	0.17465401157492225	0.1864836838329989	0.6495554514738588	0.04380299800648946	0.8610824279953918
ENSG00000103266_Q9UNE7	ENSG00000103266	Q9UNE7	16	0.035556509167679815	0.1377503099652573	0.20066335695234455	0.19686157577627586	0.12398959833170276	0.5205129331054938
ENSG00000103274_P53384-2	ENSG00000103274	P53384-2	16	2.8301963379681543e-05	0.0007356918648783558	0.3878745885869843	0.2547758588335769	0.10950680930731024	0.5836493504031861
ENSG00000103275_P63279	ENSG00000103275	P63279	16	0.5905119420445742	0.7754753633607748	0.05186318957853348	0.4955835814845037	-0.06565403830891609	0.7761018564645542
ENSG00000103316_Q14894	ENSG00000103316	Q14894	16	0.0012984510311543232	0.013224577624377232	-0.30288729754418164	0.0039238178247062395	-0.2728778725452231	0.05621929971186663
ENSG00000103319_O00418	ENSG00000103319	O00418	16	0.804129697706155	0.9053263933176399	0.023916277965210186	0.8783830012683621	0.014757614390785446	0.9629501784681413
ENSG00000103342_P15170-2	ENSG00000103342	P15170-2	16	0.6968838690743615	0.847525304393565	-0.037556175879467066	0.09677557904644846	0.15914778301464405	0.35959649615519074
ENSG00000103353_H3BRL3	ENSG00000103353	H3BRL3	16	0.9369689123641484	0.9712502035002264	0.007627009800589539	0.6705085364186937	-0.04101655637421059	0.8725443228880507
ENSG00000103356_Q5JPH6	ENSG00000103356	Q5JPH6	16	0.2318321040743377	0.4558213467755833	0.11493574648937847	0.3348575730683606	-0.09281119320637099	0.6551916961135975
ENSG00000103363_Q15370	ENSG00000103363	Q15370	16	0.5854620828782591	0.7726879781320357	0.05256865638864428	0.4539498135108939	-0.07213060676400325	0.7527546118259392
ENSG00000103365_Q9UJY4	ENSG00000103365	Q9UJY4	16	0.5801316456252996	0.7686956651404043	0.05331635020932583	0.7424585655551524	-0.03168479805491019	0.9038178624033166
ENSG00000103381_Q9BRF8	ENSG00000103381	Q9BRF8	16	6.913487903152829e-05	0.0014219787618984796	0.3700721122397659	0.0150077921548482	0.23138724488941476	0.12801586756851874
ENSG00000103415_P30519	ENSG00000103415	P30519	16	0.018975267601678517	0.09126241772323442	0.22340109452445253	0.44956087436812026	0.07283199098599474	0.7504593554387203
ENSG00000103423_Q96EY1	ENSG00000103423	Q96EY1	16	0.3851446220596251	0.6164454726497536	-0.0836140909036222	0.2042402256845045	-0.12198900611614892	0.5290589914011063
ENSG00000103449_Q9NSC2	ENSG00000103449	Q9NSC2	16	0.7650519137231967	0.885895372444933	-0.02881783394549683	0.7106147251788574	0.035773714912923534	0.8952208317592449
ENSG00000103485_Q15274	ENSG00000103485	Q15274	16	0.9053761628897627	0.9579233790409559	-0.011464668028378013	0.3749329426448763	0.08541901109166589	0.6917899074318962
ENSG00000103490_Q9ULZ3	ENSG00000103490	Q9ULZ3	16	0.6966578905704213	0.847525304393565	0.03758561565244727	0.8179622808547511	-0.022196385493427145	0.9405319130830078
ENSG00000103495_P56270-2	ENSG00000103495	P56270-2	16	0.5367567834155116	0.7386772626952832	-0.05952547343287004	0.8923957549800837	0.013046294237955228	0.967618010562359
ENSG00000103496_Q12846	ENSG00000103496	Q12846	16	0.045054840487666316	0.16034967106144166	0.19150266385323575	0.9880333173246548	0.0014465824365687099	0.996589006143331
ENSG00000103502_O14735	ENSG00000103502	O14735	16	0.06200973398100468	0.19930576599171215	0.17854469681458254	0.13088329117820827	0.14492671784379738	0.4269472964453574
ENSG00000103507_O14874	ENSG00000103507	O14874	16	0.4134272950388174	0.6440647269872981	-0.07876001076676384	0.28162134833019764	-0.10356454876828257	0.6105131497134505
ENSG00000103510_Q9H7Z6	ENSG00000103510	Q9H7Z6	16	0.015116697207322085	0.07735402003908354	-0.2311447970765748	0.18943843667835195	-0.1260576584846762	0.5109653159416937
ENSG00000103540_O43303	ENSG00000103540	O43303	16	0.11710730655803347	0.30133013283718196	-0.1502774811631191	0.08073471408288563	0.16725198072899172	0.3296281570522405
ENSG00000103544_Q7Z3J2	ENSG00000103544	Q7Z3J2	16	0.17113086877863554	0.37959175550163027	-0.13142347109262287	0.6278006218867855	0.046734835113895146	0.8525950357868874
ENSG00000103549_O75150	ENSG00000103549	O75150	16	0.05088396077634758	0.17433245962064198	-0.18665225605679905	0.0040818890550167455	-0.2717438725242654	0.05746940942074126
ENSG00000103550_Q1ED39	ENSG00000103550	Q1ED39	16	0.6822496586254921	0.8379316765010648	0.0394699689130047	0.12991082406233584	-0.14528985586760007	0.4256822194083496
ENSG00000103591_Q6PD74	ENSG00000103591	Q6PD74	15	0.5551781990600727	0.750465468220199	-0.05686006195183595	0.37028770188641796	0.08624995796769656	0.6897245802227828
ENSG00000103642_P83111	ENSG00000103642	P83111	15	0.08758995065615695	0.2488900277030499	0.16364474008478722	0.8046332748455622	0.023853536536276	0.934421660691591
ENSG00000103647_Q9UQ03-2	ENSG00000103647	Q9UQ03-2	15	0.5466119496348685	0.7443163436145144	0.05809405617974405	0.9269346603402376	0.008844323290700626	0.9779450208209611
ENSG00000103653_P41240	ENSG00000103653	P41240	15	0.0014472128536134284	0.014396476759481948	-0.30008129475351597	0.19695962376642476	-0.1239626630475544	0.5205129331054938
ENSG00000103657_Q15751	ENSG00000103657	Q15751	15	0.928594965021614	0.9683221083899775	0.00864281125512666	0.04914065108248574	0.18805241137193046	0.2530112020997922
ENSG00000103671_Q15650	ENSG00000103671	Q15650	15	0.028791329970597523	0.12097710181153694	0.20854318920069995	0.13131684590299345	0.14476548497817146	0.42788184885787184
ENSG00000103707_Q96DP5	ENSG00000103707	Q96DP5	15	0.5806950538152039	0.7689982926067054	-0.05323717250550986	0.7070258727196532	-0.036238411571539	0.8942167306302268
ENSG00000103769_P62491	ENSG00000103769	P62491	15	0.03457657392919184	0.13530129664675133	-0.20172173807334845	0.2527464194663566	-0.10997304940008637	0.5827785871683019
ENSG00000103811_A0A087X0D5	ENSG00000103811	A0A087X0D5	15	0.055344289550036715	0.18504056266171454	0.18324215732039625	0.0063745136833277365	0.2586062249258099	0.07590173727769048
ENSG00000103855_A0A0C4DGH0	ENSG00000103855	A0A0C4DGH0	15	0.3965458384305214	0.6286437799383758	0.08163266415655075	0.9153478155990808	0.01025173383841096	0.9750284433640587
ENSG00000103876_P16930	ENSG00000103876	P16930	15	0.9141255044337174	0.9619576529215282	0.010400323845983356	0.2734526095136332	0.1053305581402427	0.6017145181463346
ENSG00000103932_Q9BWH6	ENSG00000103932	Q9BWH6	15	0.2612016733869119	0.49291409023118465	-0.1080471252685004	0.7209796872640669	-0.034436172768853204	0.8985595090687962
ENSG00000103966_Q9H223	ENSG00000103966	Q9H223	15	0.2344266687681832	0.458362020569889	0.11430359778918668	0.0051973142051298495	-0.2647028856823436	0.06698992917115053
ENSG00000103978_Q8NBN3	ENSG00000103978	Q8NBN3	15	0.002047009457554969	0.018449717486967367	-0.2909207697877688	0.3484852735312425	0.09023840960930384	0.6676758734097346
ENSG00000103994_Q9H2Y7	ENSG00000103994	Q9H2Y7	15	0.002019093296790189	0.018351443379004084	-0.2912892400363142	0.6337577354003039	0.04592787367979555	0.8542781274444675
ENSG00000103995_O94986-3	ENSG00000103995	O94986-3	15	0.4542282605093949	0.6773860711692601	-0.07208623659818547	0.7473990760922596	-0.031055598502693408	0.9067697829363375
ENSG00000104047_Q8N5C7	ENSG00000104047	Q8N5C7	15	0.6814265796890892	0.8371901738352414	-0.039578057509913334	0.9797977357051549	-0.0024423009011197913	0.9947043256620004
ENSG00000104067_G3V1L9	ENSG00000104067	G3V1L9	15	0.7445209569906411	0.8750169552783124	0.031421981513071184	0.2940248611210928	0.10094731608646876	0.6232704369099008
ENSG00000104093_Q8TDJ6	ENSG00000104093	Q8TDJ6	15	1.1028741556312134e-06	5.3333647144456e-05	0.4451213919160629	0.007154798357967698	0.25509562616876263	0.08126531610131398
ENSG00000104129_Q9NVM6	ENSG00000104129	Q9NVM6	15	0.2509247918350669	0.48082533462648175	0.11039374261870184	0.3218340344433304	-0.0953328457663183	0.6444778998997794
ENSG00000104131_O75822	ENSG00000104131	O75822	15	0.2399389390468373	0.4652626810106258	-0.1129766014611044	0.2767892556170353	-0.1046049799361387	0.6045386878563683
ENSG00000104133_Q96JI7	ENSG00000104133	Q96JI7	15	0.007448993938358259	0.04698094026836347	-0.25385962416094504	0.8386138587288183	0.019641371686106184	0.9471368792342755
ENSG00000104142_Q9P253	ENSG00000104142	Q9P253	15	0.03061427532293793	0.12608182205075316	0.20627742691267603	0.06105770133075579	-0.1791895389504682	0.28389391682003773
ENSG00000104147_O43482	ENSG00000104147	O43482	15	0.31746261954401844	0.5511051398003453	-0.09619390916163346	0.14664887548908695	-0.13930788755936094	0.4531754444684472
ENSG00000104177_A0A0A0MR39	ENSG00000104177	A0A0A0MR39	15	0.03564555051646808	0.13777581605968597	-0.20056840885625526	0.08657822366350991	-0.16416261869998355	0.340566143609531
ENSG00000104231_Q8TCF1	ENSG00000104231	Q8TCF1	8	0.027343738988522805	0.117659143862713	-0.2104308801093156	0.6213058558019099	-0.04761832949760352	0.8504686384631233
ENSG00000104267_P00918	ENSG00000104267	P00918	8	0.6838233362078453	0.8389477582000772	0.03926344606429307	0.05118233806521185	0.1864165969758618	0.25837199184062026
ENSG00000104299_Q9NV88-2	ENSG00000104299	Q9NV88-2	8	0.3798584799542769	0.6113829955564899	-0.08454474867550524	0.049136671846304734	-0.18805565399905408	0.2530112020997922
ENSG00000104312_O43353	ENSG00000104312	O43353	8	0.14044833369815884	0.33575101659540996	0.14146030568053375	0.7154549127793391	0.03514828498648606	0.8963771637044657
ENSG00000104320_O60934	ENSG00000104320	O60934	8	0.028700419493809182	0.12097710181153694	-0.20865933731826994	0.24025319291121025	-0.11290159173274172	0.5684913855200394
ENSG00000104325_Q16698-2	ENSG00000104325	Q16698-2	8	0.0012198832905179467	0.012648053429510954	-0.30448959283526383	0.00044658876545928644	-0.32913387090050583	0.01243846796318343
ENSG00000104327_P05937	ENSG00000104327	P05937	8	0.034779983466067234	0.13575551155732343	-0.2014999870263753	0.0016389618612898285	-0.29682811138907034	0.0310626913710729
ENSG00000104331_Q9NX62	ENSG00000104331	Q9NX62	8	0.03099155201937205	0.1262459586673283	-0.20582284256564026	0.18323189571688692	-0.12783246001688445	0.5040776574252785
ENSG00000104332_Q8N474	ENSG00000104332	Q8N474	8	0.1233009796266949	0.3107047358532666	-0.14781495145601553	0.0910163699798678	-0.16192543269367282	0.3487146328295653
ENSG00000104356_Q99575	ENSG00000104356	Q99575	8	0.2875541716502447	0.519955574917645	-0.10230331307993083	0.19429866811585028	-0.12469713195322933	0.5173222227556679
ENSG00000104365_O14920	ENSG00000104365	O14920	8	0.9751310634063589	0.9879694988293305	0.0030066295870705955	0.11622507347700388	0.15063638720458075	0.39921598964808946
ENSG00000104369_Q9HDC5	ENSG00000104369	Q9HDC5	8	0.009847150055346749	0.05717845609589519	-0.24513635265037675	4.980832503008451e-05	-0.3767280999210336	0.0024172131071418285
ENSG00000104375_Q13188-2	ENSG00000104375	Q13188-2	8	0.008842023661383562	0.05304376883983415	-0.24853571792056034	0.4273206598827939	-0.07644686768544033	0.7331904336257085
ENSG00000104381_Q8TB36	ENSG00000104381	Q8TB36	8	0.0019752904739054255	0.018030929614107884	-0.2918767981838837	0.00027069220244065935	-0.3406805616060071	0.0084177390720139
ENSG00000104388_P61019	ENSG00000104388	P61019	8	0.7991738839924952	0.9025367476323297	-0.024534267592821526	0.5855178052924429	-0.05256085682705501	0.8293340486009425
ENSG00000104408_P60228	ENSG00000104408	P60228	8	0.12229274347820596	0.30914785711669385	-0.1482092096980775	0.026454889237309945	0.21163251370474173	0.17779878202349408
ENSG00000104412_Q15006	ENSG00000104412	Q15006	8	0.7603861451097564	0.883861693444093	0.029407755303721736	0.011104772094246441	0.241288557494207	0.1076205295548301
ENSG00000104413_Q6NXG1	ENSG00000104413	Q6NXG1	8	0.680706167818391	0.8371901738352414	-0.03967270393431191	0.06478759734139744	0.17670822585858728	0.29337465175137045
ENSG00000104427_Q96GY0	ENSG00000104427	Q96GY0	8	0.05467074384275787	0.18363688348031343	0.18374225527390906	0.20928977095801726	0.1206496273570363	0.5358554247630131
ENSG00000104435_Q93045	ENSG00000104435	Q93045	8	0.5696161476682772	0.7594288293423931	-0.054800745581322266	0.12900026914812535	-0.14563176568389966	0.42399985847249405
ENSG00000104442_Q9NVT9	ENSG00000104442	Q9NVT9	8	0.03761657698001099	0.1425245306030919	-0.1985160296501212	0.316986299874034	-0.09628819408938456	0.6401684227594772
ENSG00000104472_Q9NRG0	ENSG00000104472	Q9NRG0	8	0.7098572206370724	0.8569029745447855	-0.03587173054169798	0.952622896911588	-0.005730252211305971	0.9865191605926914
ENSG00000104517_O95071-2	ENSG00000104517	O95071-2	8	0.28557632938605504	0.5183742254042002	-0.10272182997366336	0.500065783977133	0.06497444775587116	0.776619267108962
ENSG00000104518_G3V1A6	ENSG00000104518	G3V1A6	8	0.001808619014257031	0.017024667838511576	0.29422600246011865	0.10643659735073034	0.15476779745115932	0.38127298633712486
ENSG00000104522_Q13630	ENSG00000104522	Q13630	8	0.07951384817048382	0.2345066239106215	0.1679198963056806	0.9523260204598318	0.005766201448027765	0.9865136622033769
ENSG00000104524_A0A0A0MQS1	ENSG00000104524	A0A0A0MQS1	8	0.11693793830017282	0.3010165945272632	-0.1503462199941848	0.9534139867599573	-0.005634461716102397	0.9868427854555318
ENSG00000104529_E9PRY8	ENSG00000104529	E9PRY8	8	0.11655731228619153	0.30040299972865064	-0.15050098044477134	0.2623865297769253	-0.10778065947068004	0.5928858488349275
ENSG00000104549_Q14534	ENSG00000104549	Q14534	8	0.3783777255257992	0.6094642489717615	0.08480684864104443	0.5584486588463654	-0.056391371245152824	0.8163902575467404
ENSG00000104613_Q9NVR2	ENSG00000104613	Q9NVR2	8	0.20729969725355835	0.4280560089784249	-0.12117469834290195	0.3181661390507557	-0.09605481836110494	0.6413380386277977
ENSG00000104626_Q8IV48	ENSG00000104626	Q8IV48	8	0.02520217273538546	0.11149145550186235	0.21338584335636776	0.022630447301161264	0.2172320379168552	0.16384354028252743
ENSG00000104635_Q15043-2	ENSG00000104635	Q15043-2	8	0.09295505476116388	0.25875017344725987	-0.16097527093350994	0.0023561440525017557	-0.2871185566385938	0.03961537742867781
ENSG00000104643_Q96QG7	ENSG00000104643	Q96QG7	8	0.07834522787107166	0.23243888450505887	-0.16856697488346212	0.7496268651305701	0.03077230581150427	0.9080552849909893
ENSG00000104671_O00399	ENSG00000104671	O00399	8	0.0634916301079824	0.20222195914231697	-0.17755685028348284	0.27309539305621017	0.10540859014818668	0.601461623801066
ENSG00000104679_Q9Y3T6	ENSG00000104679	Q9Y3T6	8	0.7237229618980626	0.8634246635827169	0.0340832699357167	0.2092348876790242	0.12066406008819265	0.5358554247630131
ENSG00000104687_P00390	ENSG00000104687	P00390	8	0.11503955076156765	0.29745940982633917	-0.15112201540730222	0.25854852724605754	0.10864680317589144	0.5871187045509552
ENSG00000104714_Q86X53	ENSG00000104714	Q86X53	8	0.00812385400145596	0.049868813080642935	0.2511797841765084	0.4748823768671311	0.06883587778154741	0.7647502482259312
ENSG00000104722_E7ESP9	ENSG00000104722	E7ESP9	8	0.5248610664308976	0.7296455685406488	-0.061270764326492415	0.20912070361482188	-0.1206940958950963	0.5358508909426196
ENSG00000104723_D6RDV0	ENSG00000104723	D6RDV0	8	0.16642173003725752	0.3734614451951918	0.13287156980379666	0.017624393524737325	-0.22594282850850864	0.14337937001812232
ENSG00000104728_O15013-4	ENSG00000104728	O15013-4	8	0.08126619136429833	0.23757453491952385	-0.16696374314913046	0.03676837480901966	-0.19938789523141376	0.21603491171099448
ENSG00000104731_Q8TBB5	ENSG00000104731	Q8TBB5	16	0.7820491198606779	0.8947353922757605	-0.02667756735221334	0.11456968583693193	0.15131556135252194	0.39629233664761665
ENSG00000104738_P33991	ENSG00000104738	P33991	8	0.7780534255156227	0.8929822691027945	-0.027179497453115157	0.005182440670595918	-0.2647874912911129	0.06693289301580131
ENSG00000104756_Q7L273	ENSG00000104756	Q7L273	8	0.07837244787731741	0.23243888450505887	-0.16855181505012726	0.6820672672354376	0.039493916738300265	0.8777892883654838
ENSG00000104763_A0A1B0GTZ5	ENSG00000104763	A0A1B0GTZ5	8	0.2207380875229802	0.44282093890277674	-0.11769617273830503	0.1640587429666374	-0.13360967381355146	0.4789971805974624
ENSG00000104774_O00754	ENSG00000104774	O00754	19	0.7482410076901248	0.8767687866348794	-0.030948504864266767	0.5689179842521687	0.05489975225212906	0.8216768474958586
ENSG00000104805_Q02818	ENSG00000104805	Q02818	19	0.6546368788307345	0.8204005197611678	-0.04312400871381655	0.5473177179326331	-0.05799203445883416	0.8080473152976371
ENSG00000104812_P13807	ENSG00000104812	P13807	19	0.2473575231655541	0.4752644410811571	-0.11122371114437313	0.2540544536391339	0.10967225077553187	0.5830858427902454
ENSG00000104823_Q13011	ENSG00000104823	Q13011	19	0.13074884540031062	0.3213140018702399	-0.1449767992794555	2.6732425055591697e-05	-0.3889775905776796	0.0015154682735054902
ENSG00000104824_P14866	ENSG00000104824	P14866	19	0.24577837508959124	0.4729665875433052	-0.111593757658348	0.6655612988056581	0.041671335716315414	0.8699268162090538
ENSG00000104833_P04350	ENSG00000104833	P04350	19	0.02129647838535945	0.09883750225000154	0.2193769356044005	0.2190307064313619	-0.11812963714533438	0.5483924801448716
ENSG00000104835_M0QWZ7	ENSG00000104835	M0QWZ7	19	0.476962848973904	0.69589121332328	-0.06851278522433188	0.05012152747608229	-0.18725965398951144	0.25543238266649415
ENSG00000104852_P08621	ENSG00000104852	P08621	19	0.7334465662003099	0.8698424954592001	0.03283598122157326	0.15422198822951244	-0.13677017306183895	0.46295504058025155
ENSG00000104853_O96005	ENSG00000104853	O96005	19	0.48508502074882	0.7032067749299256	0.06725863884610044	0.4984011728093608	-0.06522646121820573	0.776619267108962
ENSG00000104866_O75864	ENSG00000104866	O75864	19	0.4586801657985168	0.6808677305005801	0.0713788709760997	0.26842069218454084	0.10643616543989468	0.5970599211275949
ENSG00000104872_Q9NWS0	ENSG00000104872	Q9NWS0	19	0.012794962585497815	0.06904266437745202	-0.2366785463336865	0.07235219969673179	0.1720128472602287	0.30996549501900417
ENSG00000104880_Q6ZSZ5	ENSG00000104880	Q6ZSZ5	19	0.8137874746154189	0.9116434397327461	0.022714707636028817	0.5124186750140516	0.06311777245900341	0.7854943745018719
ENSG00000104881_Q8WUF5	ENSG00000104881	Q8WUF5	19	0.2572935899008525	0.4886207292432045	0.10893191582952694	0.03593658269158271	0.2002594556467576	0.21293918604544837
ENSG00000104884_P18074	ENSG00000104884	P18074	19	0.3009072516849751	0.5327169744737202	-0.0995265252123162	0.1416986084443092	-0.1410205865551415	0.4464648819687375
ENSG00000104889_O75792	ENSG00000104889	O75792	19	0.041220699204295684	0.1512062127731402	-0.19498573558906132	0.8161669788611426	-0.022419202451485862	0.9393398610464391
ENSG00000104897_Q15428	ENSG00000104897	Q15428	19	0.13046311219271714	0.3210892835046088	0.1450833666657409	0.6270988731446708	-0.046830107391657334	0.8523948716905074
ENSG00000104907_Q9NXH9	ENSG00000104907	Q9NXH9	19	0.5056829511386659	0.7158662559694856	-0.06412725561753664	0.94306460369512	0.006888102793689073	0.9833869619611394
ENSG00000104946_Q9HA65-3	ENSG00000104946	Q9HA65-3	19	0.5155144597757266	0.7229548173422817	0.06265609985778592	0.15193748301940846	0.13752564583225044	0.4596042924271042
ENSG00000104960_M0QY25	ENSG00000104960	M0QY25	19	0.9623702086915976	0.9826910496552661	0.004550341692444631	0.964800604211975	-0.0042562540520814365	0.9902597663085226
ENSG00000104967_Q9UNW9	ENSG00000104967	Q9UNW9	19	0.24967819853344256	0.4791470648821174	0.1106828479070372	0.9379112417578211	0.007512754820447694	0.9813709554971459
ENSG00000104969_O43765	ENSG00000104969	O43765	19	0.24358127494135534	0.47002356891668784	0.11211135589592268	0.8064764913406065	0.023623972139407364	0.9352440991180169
ENSG00000104973_Q71SY5-4	ENSG00000104973	Q71SY5-4	19	0.476670159360058	0.6956243859815636	0.06855819315353236	0.14640160477472616	0.13939239389493607	0.45287827394223007
ENSG00000104980_O43615	ENSG00000104980	O43615	19	0.07376497974969247	0.2232888300563719	0.1711803814942041	0.9796843476014966	-0.002456011578715257	0.9947043256620004
ENSG00000104983_Q9Y6R9	ENSG00000104983	Q9Y6R9	19	0.5205722941801931	0.7261055646346134	-0.06190486754151811	0.23111733461008074	-0.11511076451704805	0.5600978464713398
ENSG00000105011_Q9NVP2	ENSG00000105011	Q9NVP2	19	0.4858334141247737	0.7039695055993691	-0.06714364725137445	0.14749687544948498	-0.13901889186160013	0.45473341720792826
ENSG00000105053_Q8IV63	ENSG00000105053	Q8IV63	19	0.856010367144025	0.9349636589099601	-0.017499648961605083	0.25533643072873363	-0.10937847378159828	0.5843819847260692
ENSG00000105063_Q9UPN7	ENSG00000105063	Q9UPN7	19	0.08934332868925715	0.2522237019814813	0.16275838715766472	0.052818355982470616	0.1851442533149327	0.2631060563170348
ENSG00000105085_O95402	ENSG00000105085	O95402	19	0.4753536213478245	0.6950904913294528	0.06876262765110541	0.1987627823579673	-0.12346902410284412	0.5229150769152263
ENSG00000105088_O95897	ENSG00000105088	O95897	19	0.0007370527521130282	0.008662762865744033	0.31710734375396826	0.2589871608953924	0.10854737193676367	0.5879063616923755
ENSG00000105127_O43823	ENSG00000105127	O43823	19	0.5780389338794264	0.7665640875290278	-0.05361075814429511	0.7448086729297864	-0.03138533537517885	0.9048443691993574
ENSG00000105131_Q9H6B9	ENSG00000105131	Q9H6B9	19	0.6508005106709978	0.8173713788859578	0.04363643380414233	0.0814397957712536	-0.16686991869217238	0.3310300328113265
ENSG00000105135_A1L0T0	ENSG00000105135	A1L0T0	19	0.6432041403639989	0.8125040340532708	-0.044654702214945434	0.17673476590167708	-0.12973806434320564	0.4943390962725523
ENSG00000105171_O95707	ENSG00000105171	O95707	19	0.6880100503204414	0.8413720866652064	0.038714860868902634	0.548918903652046	0.05776081403895748	0.8083770539370949
ENSG00000105176_O94763	ENSG00000105176	O94763	19	0.07155478139001797	0.2179725296458753	-0.17248852668211612	0.048629523406480135	-0.18847071273735266	0.25240619166888517
ENSG00000105185_O14737	ENSG00000105185	O14737	19	0.39640016595066624	0.6286437799383758	0.08165776443624458	0.09261388565327996	0.1611413347813268	0.3507447816642144
ENSG00000105186_Q96NW4	ENSG00000105186	Q96NW4	19	0.3431971424981681	0.5754774742524866	0.09122909377972624	0.9160783289603472	-0.010162940607338954	0.9753029375635672
ENSG00000105193_P62249	ENSG00000105193	P62249	19	0.7382612806959954	0.8712734063084434	-0.032220390628589245	0.5764888480038481	0.053829146857616486	0.8258022272613263
ENSG00000105197_Q3ZCQ8-2	ENSG00000105197	Q3ZCQ8-2	19	0.5993329977242685	0.7828188874396078	-0.050637406995167986	0.0210873115847129	-0.21972365597459573	0.1587371539502595
ENSG00000105202_P22087	ENSG00000105202	P22087	19	0.22202029232625511	0.44425096395667285	0.11737220692179473	0.1703607513193114	-0.13165825580025664	0.48633068976868876
ENSG00000105220_P06744	ENSG00000105220	P06744	19	0.923841842589622	0.9672523356239338	-0.00921980238856405	0.9349278995630264	-0.007874513680533705	0.9802139234482885
ENSG00000105221_P31751	ENSG00000105221	P31751	19	0.009465566839896692	0.05562557136432797	0.2463892901302099	0.2471344408288633	0.11127588752521916	0.5760241495423504
ENSG00000105223_Q8IV08	ENSG00000105223	Q8IV08	19	3.3294670602128937e-06	0.00013520624247723514	0.4267817876235645	0.0016868984616115234	0.2960690114720829	0.031671275514266746
ENSG00000105229_Q8N2W9	ENSG00000105229	Q8N2W9	19	0.9288255696371436	0.9683221083899775	0.008614825616034764	0.4549310777121112	-0.07197431078049189	0.7532872671538308
ENSG00000105245_Q9Y6R0	ENSG00000105245	Q9Y6R0	19	0.15207006885523236	0.3530098520329414	0.13748156835029202	0.5518730839010586	0.05733507251866735	0.810152841611684
ENSG00000105248_Q9BW85	ENSG00000105248	Q9BW85	19	0.08250376134402848	0.24014233660604906	0.16629836797823289	0.9784799460743572	-0.002601648635480137	0.9941542481446998
ENSG00000105254_Q99426	ENSG00000105254	Q99426	19	0.03149648772633205	0.12741395258385282	0.20522171347593055	0.35234440734317896	0.08952136892004303	0.6709626258740797
ENSG00000105255_Q9BTV5	ENSG00000105255	Q9BTV5	19	0.9582399357209712	0.9813207230508167	-0.005050218496797336	0.7254189841976783	0.03386531411459337	0.8997085412785741
ENSG00000105258_P36954	ENSG00000105258	P36954	19	0.8644342220841404	0.9389901915128652	-0.01646568425464514	0.6365369252817445	0.04555248700898058	0.8554368727637487
ENSG00000105281_Q15758	ENSG00000105281	Q15758	19	0.3717970385379701	0.6025413760905706	0.08597927068849742	0.0006830067410011852	-0.31896754193676	0.016448651063359368
ENSG00000105287_B4DTS2	ENSG00000105287	B4DTS2	19	0.31922007262603075	0.5524315433015994	-0.09584681943100512	0.7265145385421045	-0.03372461520191298	0.8997085412785741
ENSG00000105289_O95049-4	ENSG00000105289	O95049-4	19	0.030976951622562032	0.1262459586673283	0.2058403473599472	0.00841031884103653	0.25010131518164325	0.08991140337186102
ENSG00000105298_Q8WUQ7-2	ENSG00000105298	Q8WUQ7-2	19	0.9350349670400876	0.9708976423863227	-0.00786152886172951	0.021974257637043897	-0.21827316651770032	0.16180125795736
ENSG00000105321_Q9Y3X0	ENSG00000105321	Q9Y3X0	19	0.015410954410321219	0.07835344798506012	0.2304972167332199	0.24871181676101525	0.11090765256238448	0.577592952704614
ENSG00000105323_Q9BUJ2-2	ENSG00000105323	Q9BUJ2-2	19	0.1127336122385684	0.2935336759273863	-0.15207783339083894	0.7730278423250054	0.027811834595084458	0.9194237575072383
ENSG00000105341_Q9NW81	ENSG00000105341	Q9NW81	19	0.9549327200281984	0.9799933227569475	0.005450578525932122	0.24152713750153285	-0.11259820825276695	0.5698795001233221
ENSG00000105355_O60664-4	ENSG00000105355	O60664-4	19	0.0474719705502354	0.16633760092163918	0.18943167217628246	0.017929320036283638	0.2253547542294461	0.14392885232134459
ENSG00000105357_Q7Z406-6	ENSG00000105357	Q7Z406-6	19	0.9987554544699336	0.9990708675299272	-0.00015044034499296774	0.8715014027405222	-0.015599683405791891	0.958434120846987
ENSG00000105364_Q9BYD3	ENSG00000105364	Q9BYD3	19	0.2329177538985236	0.45738808770835304	0.11467063606732457	0.5281708390626275	-0.060783195282466326	0.7943998775156497
ENSG00000105372_P39019	ENSG00000105372	P39019	19	0.9930241690692778	0.9958537456156206	-0.000843246912381402	0.7847202479694608	0.026342424259266483	0.9253806429365166
ENSG00000105373_Q9NZM5	ENSG00000105373	Q9NZM5	19	0.261723408618477	0.4936045827919177	0.10792968943889003	0.6361547058921802	-0.04560407304060637	0.8554368727637487
ENSG00000105379_P38117-2	ENSG00000105379	P38117-2	19	5.854553734716198e-06	0.00021438495901402957	0.41698268966784297	0.06822584971679667	0.17452185410721288	0.29960441153580547
ENSG00000105393_Q9NWV8	ENSG00000105393	Q9NWV8	19	0.4959358245073488	0.710515270325085	-0.06560051471073455	0.2679711110232456	-0.10653562690268027	0.5970599211275949
ENSG00000105401_Q16543	ENSG00000105401	Q16543	19	0.5770777172751768	0.7657702846540102	0.05374615007222075	0.7563705225238926	-0.029916344767768457	0.910259171010343
ENSG00000105402_P54920	ENSG00000105402	P54920	19	0.027371846054738882	0.117659143862713	0.2103934275808968	0.2276449404987825	0.11596645571445853	0.556852297296771
ENSG00000105404_M0R3D4	ENSG00000105404	M0R3D4	19	0.09416155575688016	0.2606000243424359	0.1603918486333894	0.781470926348405	0.026750154295596826	0.9238056383443222
ENSG00000105409_P13637-2	ENSG00000105409	P13637-2	19	0.8234292210152075	0.9170928472453129	-0.02151859136732967	0.2869928562262819	-0.10242189367870792	0.6157373144320021
ENSG00000105426_Q13332-6	ENSG00000105426	Q13332-6	19	0.9839736188563458	0.9918465092874426	-0.0019373925384836047	0.705144933174276	0.03648229339646997	0.8925426678352918
ENSG00000105443_A0A0D9SFG6	ENSG00000105443	A0A0D9SFG6	19	0.6309209143280599	0.8064737676086077	-0.04631175499560554	0.16511836309648287	0.133277721043891	0.4803234427193522
ENSG00000105447_Q9BQ67	ENSG00000105447	Q9BQ67	19	0.5672363183912836	0.7577551103969185	0.0551384649196704	0.24146257786031156	-0.11261355604492955	0.5698795001233221
ENSG00000105486_P18858	ENSG00000105486	P18858	19	0.4391890689003325	0.6646590423993326	-0.07450488218133715	0.4421157813337305	-0.07403059305998409	0.7437483443340014
ENSG00000105514_O95716	ENSG00000105514	O95716	19	0.5123929432070994	0.7211751377953731	0.06312161581985079	0.06027061403970144	-0.179728888734187	0.28186887414514095
ENSG00000105518_Q6UW68	ENSG00000105518	Q6UW68	19	0.0261050671970298	0.11398051451058613	0.2121148835063208	0.4068198932037843	0.07987598470625495	0.7177329209208049
ENSG00000105552_O15382	ENSG00000105552	O15382	19	0.8801684316424732	0.9470684237129171	0.014539323325750184	0.027529708307692625	-0.21018368272643653	0.18237364159160183
ENSG00000105568_P30153	ENSG00000105568	P30153	19	0.02883465903260117	0.12097710181153694	-0.20848794109405905	0.5346109582889311	0.05983886116512765	0.79923402539064
ENSG00000105576_O14787-2	ENSG00000105576	O14787-2	19	0.4803480621911226	0.698172915331908	-0.06798869032665777	0.20845606270557573	0.120869160857297	0.53473719057265
ENSG00000105607_Q92947	ENSG00000105607	Q92947	19	0.023435568658906333	0.10619765912315567	-0.21598938212454988	0.14869587575366527	-0.138612405616466	0.455234794296402
ENSG00000105612_O00115-2	ENSG00000105612	O00115-2	19	0.9153941567618332	0.9625214553432201	0.010246100858689731	0.4937893300776746	0.06592698773931492	0.7747280059949997
ENSG00000105618_Q8WWY3	ENSG00000105618	Q8WWY3	19	0.6923860372917784	0.8441619604009654	-0.03814279392150576	0.08104807900736312	-0.16708184954735644	0.3304863107072999
ENSG00000105640_Q02543	ENSG00000105640	Q02543	19	0.39062313997457065	0.6226969279665086	-0.08265765222657957	0.9351175215627956	0.007851516995612684	0.9802139234482885
ENSG00000105649_P20336	ENSG00000105649	P20336	19	0.17449698743013808	0.38453960541112137	0.1304063027112867	0.20223379436545524	-0.12252779839987504	0.527272969761948
ENSG00000105655_Q9NPH2	ENSG00000105655	Q9NPH2	19	0.9359198300343672	0.9711774606497424	-0.00775422071963825	0.8430734828497409	0.01909146787036938	0.9476625252036217
ENSG00000105662_Q6UUV9	ENSG00000105662	Q6UUV9	19	0.09961704330051042	0.2703792602787839	-0.15782517791526265	0.6997400433667377	0.0371843790238901	0.8892153774662411
ENSG00000105669_O14579	ENSG00000105669	O14579	19	0.27613290358587594	0.5094065067607816	0.10474724165077803	0.753082040262592	0.030333451639801036	0.9088627637381621
ENSG00000105671_Q9Y6V7	ENSG00000105671	Q9Y6V7	19	0.9979597876127048	0.9985903103027144	-0.00024662051734361355	0.5437121163381151	0.05851391658212735	0.804950269762414
ENSG00000105676_Q6NXE6-2	ENSG00000105676	Q6NXE6-2	19	0.4103626089405193	0.6412548415486409	0.07927631899948384	0.7346889539626139	0.032677008927553486	0.9008436932701307
ENSG00000105698_Q15853-4	ENSG00000105698	Q15853-4	19	0.16872394377217256	0.3759819485557525	-0.1321598844805679	0.7649439241359035	-0.028831475617863013	0.9155305392625379
ENSG00000105699_Q86X29-6	ENSG00000105699	Q86X29-6	19	0.5281321135736705	0.7318399107741456	0.060788891106056016	3.417408557098395e-05	-0.3842013965383152	0.0018396570770396906
ENSG00000105701_Q14318-2	ENSG00000105701	Q14318-2	19	0.20322112371742887	0.42196192027201307	0.12226219095316347	0.4377293420999482	-0.07474210724472376	0.7400866829371233
ENSG00000105705_Q8IWZ8	ENSG00000105705	Q8IWZ8	19	0.3664853049924832	0.5980639894712472	0.0869348988109209	0.9431672641725322	-0.0068756620373474795	0.9833869619611394
ENSG00000105723_P49840	ENSG00000105723	P49840	19	0.03092909727568972	0.12616602140469696	0.20589777017172087	0.01576939406008368	0.2297227299948673	0.13292441177997946
ENSG00000105726_Q9HD20	ENSG00000105726	Q9HD20	19	0.2575063082680212	0.48871283800417786	-0.10888352092153043	0.8505708757496236	-0.018168353749557144	0.9515499311214822
ENSG00000105732_A0A0C4DFM2	ENSG00000105732	A0A0C4DFM2	19	0.16922065209883794	0.3766642631949518	0.13200728052893282	0.9629719382283752	0.00447752621521849	0.9901374514643575
ENSG00000105738_O60292	ENSG00000105738	O60292	19	0.3882238794417643	0.6204419364382876	0.08307551625001727	0.9200750556793486	0.009677290483834398	0.9762038174824577
ENSG00000105755_O95571	ENSG00000105755	O95571	19	0.12112937812531906	0.30792442851013335	0.14866725422181448	0.19221615230243974	0.1252770347939921	0.5145892128057751
ENSG00000105767_Q8NFZ8	ENSG00000105767	Q8NFZ8	19	0.006851494308135656	0.04410997605898311	0.2564179162464235	0.03532232901687065	0.20091403016485107	0.21048822296006825
ENSG00000105771_Q9H0W8	ENSG00000105771	Q9H0W8	19	0.08867430319630942	0.2510690694806892	0.1630949423430077	0.14595088807702575	0.13954670661636778	0.45232771602391236
ENSG00000105778_Q8NBF6	ENSG00000105778	Q8NBF6	7	0.011968650302093957	0.0656462334751214	-0.23886111259660645	0.9535875968661204	-0.005613440569905114	0.9868630283561175
ENSG00000105793_A4D1E9	ENSG00000105793	A4D1E9	7	0.454831965698601	0.6779671771060323	-0.07199008885469398	0.4064140283413895	-0.07994487993188983	0.7176097755112848
ENSG00000105810_Q00534	ENSG00000105810	Q00534	7	0.04426356176653806	0.15842353886498226	0.1922006964865204	0.002161262799795819	0.2894585838302006	0.03763768707685038
ENSG00000105819_O75439	ENSG00000105819	O75439	7	0.29908419299365435	0.5307419618642647	-0.09990077286848907	0.020962242814580197	-0.21993238715930255	0.15832669764157264
ENSG00000105821_Q99543	ENSG00000105821	Q99543	7	0.8212853145568205	0.9161546870430459	0.0217842672573859	0.24319795231588945	0.11220199081343726	0.5715062665207585
ENSG00000105829_O15155	ENSG00000105829	O15155	0	0.9530100584452628	0.9791305092849074	-0.005683371390566204	0.33130686261747605	-0.0934923858759384	0.6532761819598979
ENSG00000105835_P43490	ENSG00000105835	P43490	7	0.8155406407780588	0.9126391025135139	-0.02249696570170596	0.31947584939266305	0.09579640750063488	0.6425647482363362
ENSG00000105849_Q3B726	ENSG00000105849	Q3B726	7	0.7734219584482072	0.8900323536365836	-0.027762203169751216	0.029815647835934038	-0.2072555716022464	0.1911902302672607
ENSG00000105854_Q15165-3	ENSG00000105854	Q15165-3	7	0.00019402585543526666	0.0031276177969018176	-0.3481196939698852	2.8460678137423547e-05	-0.3877662636661544	0.0015992903872660985
ENSG00000105875_C9J1X0	ENSG00000105875	C9J1X0	7	0.8308369654217208	0.9210793568688278	0.020601838640123826	0.10378907834029033	-0.15593598689069935	0.3758467133114188
ENSG00000105879_Q75N03	ENSG00000105879	Q75N03	7	0.2383560711133388	0.4630437628037416	-0.11335546071644408	0.7154770161150764	0.035145432244830584	0.8963771637044657
ENSG00000105887_P58546	ENSG00000105887	P58546	7	0.08737744370245856	0.2488900277030499	-0.16375312085421334	0.5587629740490194	0.056346396106527225	0.8164771012221756
ENSG00000105926_Q9NZW5	ENSG00000105926	Q9NZW5	7	0.1618999011084146	0.3680407035962686	-0.13429094674996114	2.986113460713576e-07	-0.4655116733281645	3.542415338765031e-05
ENSG00000105939_C9J6P4	ENSG00000105939	C9J6P4	7	0.3641018470503687	0.5960168478201772	-0.08736647007163786	0.0008249253057447753	-0.3143341010193957	0.018607294044369824
ENSG00000105948_A0AVF1	ENSG00000105948	A0AVF1	7	0.0007240833349630066	0.008564416173435858	-0.3175420512914349	0.02404313050047613	-0.21507561430390293	0.16796106214400228
ENSG00000105953_Q02218	ENSG00000105953	Q02218	7	0.13092789754789436	0.3214838104519034	-0.14491011053598474	0.014332550493158463	-0.2329255512146062	0.12472434272905951
ENSG00000105993_O75190	ENSG00000105993	O75190	7	0.06342770549001753	0.20222169817778612	0.17759907316071805	0.3015071437130726	0.09940370193383988	0.6294980863738846
ENSG00000106009_Q6PJG6	ENSG00000106009	Q6PJG6	7	0.7405164743712584	0.87304690360924	-0.03193249682830125	0.08938038109131925	-0.1627398064162085	0.3463966876038577
ENSG00000106028_Q04837	ENSG00000106028	Q04837	7	0.8328340444519605	0.9225237527825552	-0.020355005457866945	0.0332124497303637	-0.20323794796804767	0.20437939766830918
ENSG00000106049_P31937	ENSG00000106049	P31937	7	0.011528163809515091	0.0644011620222911	-0.2400789652418405	0.18960077541657694	-0.1260118084527254	0.5111879492081616
ENSG00000106052_B8ZZD4	ENSG00000106052	B8ZZD4	7	0.002611491470422338	0.02191231584784836	-0.2843038490567031	0.008420938042279282	-0.2500619628987279	0.08991140337186102
ENSG00000106066_Q9H3G5	ENSG00000106066	Q9H3G5	7	0.05396534717367127	0.18165274938640144	-0.18427146375060527	0.058442123063328334	-0.18100444921413614	0.27709558185816524
ENSG00000106070_Q13322-4	ENSG00000106070	Q13322-4	7	0.2755323549890037	0.5092024847728116	-0.1048776075333221	0.013200507814158087	-0.2356520504558427	0.1198614880410246
ENSG00000106077_Q8NFV4-4	ENSG00000106077	Q8NFV4-4	7	0.00015542268665502595	0.0026683000540910283	0.3529752864252686	0.6863133319529364	0.03893703186650838	0.879656503499502
ENSG00000106078_O75128	ENSG00000106078	O75128	7	0.0239269562393284	0.10766844355936946	0.2152488001747945	0.0002388971372225817	0.3434937020130322	0.007690326939938987
ENSG00000106080_Q9NWM8	ENSG00000106080	Q9NWM8	7	0.016716987684719763	0.08338749368716512	-0.22774641989514716	0.011980477503669179	-0.2388289566224505	0.11302936507879936
ENSG00000106086_J3KQS5	ENSG00000106086	J3KQS5	7	0.11879379315229685	0.3038144763448252	-0.14959717601546235	0.4858562442127664	0.06714014086564203	0.7721148847499335
ENSG00000106105_P41250	ENSG00000106105	P41250	7	0.18635432945830369	0.4000294510634252	0.1269341951761938	0.24087568251330302	0.1127532097651938	0.5687613793513525
ENSG00000106144_P42575	ENSG00000106144	P42575	7	0.4505280108447278	0.673294396957148	-0.07267710857339066	0.7680924120775605	0.0284339784811313	0.916616988034436
ENSG00000106153_Q9Y6H1	ENSG00000106153	Q9Y6H1	7	0.4005543576981329	0.6324805224371066	-0.08094410994412245	0.30249884052909465	-0.09920101094317917	0.6303863280511973
ENSG00000106211_P04792	ENSG00000106211	P04792	7	0.09089085436143912	0.2545506464985486	0.16198749958221434	0.06711721113828553	0.1752168618920864	0.29814154257790015
ENSG00000106244_Q13442	ENSG00000106244	Q13442	7	0.092924231718809	0.25875017344725987	0.16099025418742424	0.5974481338877549	0.05089864444002663	0.8350976970728687
ENSG00000106245_P41223	ENSG00000106245	P41223	7	0.5292811725387567	0.7323518301087765	0.06061997428221565	0.9495409193963174	0.006103492860567935	0.9853686831833772
ENSG00000106263_P55884-2	ENSG00000106263	P55884-2	7	0.7188619303250511	0.8610305026676496	0.03470891858541368	0.8076575384622738	-0.02347694744512873	0.9355975029637118
ENSG00000106266_Q9Y5X2	ENSG00000106266	Q9Y5X2	7	0.8543375577640528	0.934543803848032	0.017705206258242984	0.3052313485801185	0.09864476303364476	0.6333624685814818
ENSG00000106268_P36639-4	ENSG00000106268	P36639-4	7	0.1837528448677199	0.39661815067700357	-0.12768182039623618	0.2472785531129353	-0.11124217761073682	0.5760241495423504
ENSG00000106278_P23471	ENSG00000106278	P23471	7	1.9001500999972807e-05	0.0005502997306567553	-0.3954960351815355	0.1664024666070235	-0.13287755540986934	0.4818016491365111
ENSG00000106290_J3KR72	ENSG00000106290	J3KR72	7	0.4661377467067954	0.6871621615460305	-0.0702023734664784	3.899493645092196e-05	-0.3816040918377015	0.002014528733101662
ENSG00000106299_O00401	ENSG00000106299	O00401	7	0.015447557537192748	0.07847656535534567	0.2304174153615731	0.007602251929656701	0.25323275389904	0.08396680653347192
ENSG00000106305_Q13155	ENSG00000106305	Q13155	7	0.7809001096820966	0.8947353922757605	-0.026821829811552324	0.5632724924752257	-0.055702458361319054	0.8198248877889046
ENSG00000106344_Q9NW13	ENSG00000106344	Q9NW13	7	0.9513786786200874	0.9787242496034839	0.005880921868682004	0.7861657298031213	-0.02616119251169846	0.9257679531468374
ENSG00000106346_Q9H9J4-2	ENSG00000106346	Q9H9J4-2	7	0.12692361170995914	0.3165268359416969	-0.1464185169986658	0.9824253033549804	0.0021245933956737188	0.9958581699610325
ENSG00000106348_P20839-3	ENSG00000106348	P20839-3	7	0.00019066731446139504	0.0030908945922633285	-0.3485047350214886	0.3411976971496038	-0.09160617388215724	0.6609351218446816
ENSG00000106367_P61966	ENSG00000106367	P61966	7	0.08529546645363394	0.24516641560062205	0.1648262051192162	0.04024772362219186	-0.19591249179373205	0.22877277508763183
ENSG00000106392_Q9NS00	ENSG00000106392	Q9NS00	7	0.5351660863462708	0.7375776514881837	0.05975772747225853	0.5823829359951346	0.05300018049820684	0.8277668267106351
ENSG00000106397_O60568	ENSG00000106397	O60568	7	0.0002495134454874973	0.0037490031452736797	0.3425177918852033	0.46390218602643296	-0.07055395933740344	0.7575216425402318
ENSG00000106399_P35244	ENSG00000106399	P35244	7	0.4387778708641173	0.6643814883621283	0.07457166207828256	0.06440362471790677	0.1769582070247839	0.29281023416814106
ENSG00000106443_A0A0U1RRH6	ENSG00000106443	A0A0U1RRH6	7	0.5839267505123141	0.7717871822440038	-0.052783693483797564	0.0901650452192362	-0.16234774796124246	0.34779469499359295
ENSG00000106459_Q16656	ENSG00000106459	Q16656	7	0.037244740884268164	0.14179413071023966	-0.19889618646503104	0.6959160934344527	0.03768227899144025	0.886818876972569
ENSG00000106460_Q9NUM4	ENSG00000106460	Q9NUM4	7	0.04712481031671534	0.16557718988152614	-0.18972365686466408	0.8160801505975772	-0.022429981789058702	0.9393398610464391
ENSG00000106462_Q15910	ENSG00000106462	Q15910	7	0.011837783504249392	0.0652107465212347	-0.23921878183742515	0.022382063041200724	-0.217623048963718	0.1633023870637037
ENSG00000106484_C9JW74	ENSG00000106484	C9JW74	7	0.00036336444799782913	0.004989957263470492	-0.3339448216304735	0.0011883420389206835	-0.3051594086930943	0.0250409434798526
ENSG00000106524_Q8IV38	ENSG00000106524	Q8IV38	7	0.00016829799114817827	0.002842858908806551	-0.3512423069818663	0.37467324334772617	-0.08546530004552852	0.6917899074318962
ENSG00000106537_O95857	ENSG00000106537	O95857	7	0.02380050100371442	0.10739043722117582	-0.2154381315984288	0.21869165750067868	0.11821599818759206	0.5482494986595954
ENSG00000106538_C9J8S2	ENSG00000106538	C9J8S2	7	0.35494223120810503	0.5866316291947157	-0.08904144151103607	0.31525409131243026	-0.09663185037430667	0.6392901896003255
ENSG00000106554_C9JRZ6	ENSG00000106554	C9JRZ6	7	0.3932490301373544	0.625428520718691	-0.08220207593108142	0.03682921536568624	-0.19932479821097268	0.21605123959028025
ENSG00000106591_Q9BYC8	ENSG00000106591	Q9BYC8	7	0.007187926055633208	0.045718385102847765	0.25495422357006875	0.5802377495792619	-0.053301436339009016	0.8276559839244604
ENSG00000106603_Q9GZY4	ENSG00000106603	Q9GZY4	7	0.2593813225672311	0.491088068877289	-0.10845811987829927	0.2617869713019653	-0.10791539321017052	0.5923727792866089
ENSG00000106605_P53004	ENSG00000106605	P53004	7	0.003543271014685656	0.027884002332961032	0.2757854844629411	0.0048193755587866574	0.26692293383315	0.06365550480327284
ENSG00000106608_Q8TCY9	ENSG00000106608	Q8TCY9	7	0.1401405581861363	0.3353949513068279	0.1415690046436146	0.002117940901510705	0.29000459072422724	0.03706975250021196
ENSG00000106615_Q15382	ENSG00000106615	Q15382	7	0.2342502240579997	0.45829992878549347	-0.1143464319531644	0.8898152950324125	-0.013361115355600516	0.9668217185124266
ENSG00000106628_P49005	ENSG00000106628	P49005	7	0.6326112120798424	0.8073311902751413	-0.04608293540684162	0.18281229411525932	0.12795402128108785	0.5032640980242162
ENSG00000106636_O15498	ENSG00000106636	O15498	7	0.061740395924385114	0.1988436238845855	0.17872630368723613	0.26870492547781083	0.10637334231808324	0.5970599211275949
ENSG00000106638_E9PF19	ENSG00000106638	E9PF19	7	0.08370172323437121	0.24212347794052128	-0.16566184421120195	0.0727398544567148	-0.17178312933409515	0.3105881652226889
ENSG00000106665_Q9UDT6	ENSG00000106665	Q9UDT6	7	0.4109363561803928	0.641676563076852	-0.07917948847945319	0.72518984623648	0.033894750636317625	0.8997085412785741
ENSG00000106682_Q15056	ENSG00000106682	Q15056	7	0.1375009760367652	0.3321223933383573	-0.14250876312877986	0.6065168976418736	0.049645073898382984	0.8408022606132529
ENSG00000106683_E9PC47	ENSG00000106683	E9PC47	7	0.1647287287470644	0.37150462677559737	-0.13339959946303045	0.3211710412205576	0.0954629523209746	0.6441520632620201
ENSG00000106723_Q9Y657	ENSG00000106723	Q9Y657	9	0.2990921553047238	0.5307419618642647	0.09989913506344007	0.04028475542776504	0.19587687808452964	0.22878026885661598
ENSG00000106771_Q9H330-2	ENSG00000106771	Q9H330-2	9	9.915520002139788e-07	4.9958139563772626e-05	-0.4468323160479647	0.4043149883823503	-0.08030183853006215	0.7158057309811612
ENSG00000106789_Q92828	ENSG00000106789	Q92828	9	0.9615291391065812	0.9824969799880466	0.004652124077767083	0.4247404911747689	-0.07687312266805575	0.7314576465278096
ENSG00000106799_P36897	ENSG00000106799	P36897	9	0.2029149419871623	0.42146431393071254	-0.1223444594157092	0.26298299065049235	-0.1076468297168508	0.5930701145252817
ENSG00000106803_P60468	ENSG00000106803	P60468	9	0.17209048763070686	0.3807870203075543	0.13113200246398588	0.9496396785917082	0.006091531331400833	0.9853686831833772
ENSG00000106853_Q14914	ENSG00000106853	Q14914	9	0.0147591886998843	0.07634282531858844	-0.2319464715030543	0.2471902792381948	-0.1112628245161553	0.5760241495423504
ENSG00000106976_Q05193	ENSG00000106976	Q05193	9	0.9139607247494616	0.9619440424136633	0.010420357109214748	0.27013710825320275	0.1060574742481736	0.5980701937231273
ENSG00000106993_B1AL69	ENSG00000106993	B1AL69	9	0.5431306869310418	0.742497389233524	0.058598232402127484	0.7274544320051941	0.03360396382041679	0.8997085412785741
ENSG00000107021_Q9NVG8	ENSG00000107021	Q9NVG8	9	0.5489027231394028	0.7465218443727172	0.057763148953829314	0.7524480917285958	-0.030413925033738257	0.9086557240105607
ENSG00000107104_Q14678	ENSG00000107104	Q14678	9	0.6763926832823844	0.8347558920434627	-0.040240195624629375	0.09974683594113133	-0.15776547670417418	0.3658750771771164
ENSG00000107105_A0A0A0MRX1	ENSG00000107105	A0A0A0MRX1	9	1.956576466429097e-06	8.790717670091014e-05	-0.4357395934013957	1.6633200919331894e-05	-0.3980012738121656	0.001034488204749904
ENSG00000107130_P62166	ENSG00000107130	P62166	9	9.651207099432895e-07	4.9958139563772626e-05	0.4472652796416874	0.0014414509575814726	0.3001849869115655	0.02867681625548731
ENSG00000107164_Q96I24	ENSG00000107164	Q96I24	9	0.14627542970404953	0.34435334343186685	-0.13943555652120318	0.5565734549565663	-0.056659945512401486	0.8142063376231476
ENSG00000107185_Q92546	ENSG00000107185	Q92546	9	0.6141362786833994	0.7932232303226651	-0.04859823036847288	0.4998389117395176	-0.0650087691491943	0.776619267108962
ENSG00000107186_O75970	ENSG00000107186	O75970	9	0.00024476478109947456	0.003718428988645495	-0.3429494718958929	0.4894508129356121	-0.06658915534838558	0.7738070036692866
ENSG00000107201_O95786	ENSG00000107201	O95786	9	0.05862172568761796	0.19202100942660796	-0.1808777227969506	0.22845202561040895	-0.11576675543399287	0.5579350652155088
ENSG00000107223_O60869-2	ENSG00000107223	O60869-2	9	0.33108391262020537	0.5648846179501753	0.0935353129605006	0.8397863203604231	0.019496738394956928	0.9474576615036043
ENSG00000107262_J3QTA2	ENSG00000107262	J3QTA2	9	0.08986924259681227	0.25281640062538174	-0.16249522689781876	0.1558041865202824	-0.13625185084260555	0.4658520786656102
ENSG00000107263_Q13905	ENSG00000107263	Q13905	9	0.21179290457345892	0.4329377150369677	-0.11999422651508315	0.18643897263143575	0.1269099982585257	0.5090912441078335
ENSG00000107290_Q7Z333	ENSG00000107290	Q7Z333	9	0.1064905599639416	0.28250322335492883	0.1547442245392379	0.06656015796316023	0.17556960226593146	0.29714330495364916
ENSG00000107295_Q99962	ENSG00000107295	Q99962	9	0.9805390152978284	0.9902232187451045	-0.0023526679446834904	0.2616487147490729	0.10794649226726756	0.5922691401705162
ENSG00000107341_Q712K3	ENSG00000107341	Q712K3	9	0.5027988334799312	0.7140144726005041	-0.06456162781896299	0.6094859597817229	0.04923646693219578	0.8420028161228633
ENSG00000107362_Q5VST6	ENSG00000107362	Q5VST6	9	0.3654440817022625	0.5975391203229591	0.08712321926412832	0.4236779681773235	0.0770490894271308	0.7309432738609057
ENSG00000107371_Q9NQT5	ENSG00000107371	Q9NQT5	9	0.6880976408688589	0.8413720866652064	0.03870339713820417	0.7668436098799611	-0.028591582573387786	0.9160531130339162
ENSG00000107372_O76080	ENSG00000107372	O76080	9	0.003388292126613425	0.02687348805556614	0.2770505859078644	0.15615523504263093	0.1361373831556639	0.46635451546997375
ENSG00000107438_O00151	ENSG00000107438	O00151	10	0.006281428652866004	0.0419716165934004	0.2590501470988497	0.012129326536548413	0.2384266177034664	0.11398480994336185
ENSG00000107537_O14832	ENSG00000107537	O14832	10	0.09932437445631782	0.26981985942571757	-0.157960022776573	0.00775525543952315	-0.25261796960493776	0.08506877798901592
ENSG00000107554_Q6XZF7	ENSG00000107554	Q6XZF7	10	0.8850972615669813	0.9492282295626928	-0.013937090222110309	0.0003732761741927449	0.3333214391045154	0.010771203476931189
ENSG00000107560_Q7L804-2	ENSG00000107560	Q7L804-2	10	0.14382166319709744	0.3403611793938849	-0.14028059711921054	0.964240622329294	-0.004324010556297751	0.9902597663085226
ENSG00000107566_O75477	ENSG00000107566	O75477	10	0.1673340879247453	0.3741746854185605	-0.13258866477307293	0.03420145122904731	-0.20213358359259698	0.20835263132169396
ENSG00000107581_Q14152	ENSG00000107581	Q14152	10	0.6445372090107601	0.8128893527937816	0.04447565580596476	0.038818192654702335	0.19730870113477228	0.223021831521097
ENSG00000107625_Q9BQ39	ENSG00000107625	Q9BQ39	10	0.1259922705235781	0.3149806763089452	-0.14677457068363492	0.4516281814868011	-0.07250114691447132	0.7512672372382363
ENSG00000107643_P45983-3	ENSG00000107643	P45983-3	10	0.0037687800857733288	0.029116124199236634	-0.27403057007373266	0.8355184768544671	-0.020023424163393054	0.9458848238814948
ENSG00000107651_Q9Y6Y8	ENSG00000107651	Q9Y6Y8	10	0.9375278246087286	0.9714162199699535	-0.0075592418859078536	0.4367504365181451	-0.07490144388666263	0.7393292663649823
ENSG00000107669_O95260-2	ENSG00000107669	O95260-2	10	0.008040445699040886	0.04969387658870635	-0.2515001033595535	0.9201246721759412	0.009671263031153246	0.9762038174824577
ENSG00000107672_Q9NXX6	ENSG00000107672	Q9NXX6	10	0.4969777652568699	0.7108498855051413	-0.0654423079674229	0.04498925448521169	-0.19156013185521886	0.24218585229602194
ENSG00000107679_Q9HB21	ENSG00000107679	Q9HB21	10	0.014256637338534968	0.07439522037859886	-0.2331024119050446	0.9446964013385926	-0.006690369078795666	0.9838603718054014
ENSG00000107719_Q9ULE6	ENSG00000107719	Q9ULE6	10	0.7596766898078281	0.8834515807003094	0.029497550664794887	0.8616373685209445	-0.01680876425140719	0.9544611763349767
ENSG00000107745_F6XEV2	ENSG00000107745	F6XEV2	10	0.4134927652125546	0.6440647269872981	0.07874900544135396	0.3841156413503369	0.08379464164414985	0.6990468177529142
ENSG00000107758_P16298	ENSG00000107758	P16298	10	0.1009371489405432	0.27291371683241195	-0.15722079304807202	0.6088214099915721	0.049327847209051034	0.8418025791568711
ENSG00000107779_P36894	ENSG00000107779	P36894	10	0.2740209516447062	0.5077971276022167	-0.1052065483737412	0.3458327627094732	0.0907341441307299	0.6642892587456928
ENSG00000107789_Q9UNW1	ENSG00000107789	Q9UNW1	10	0.6153203700906936	0.7942246423236643	-0.04843605535451634	0.002408259337391644	-0.2865224543283	0.04004204820533156
ENSG00000107798_P38571	ENSG00000107798	P38571	10	0.39554677992937504	0.6280172558527797	0.08180491863040404	0.6936740666246489	0.03797466455802919	0.8856918193676557
ENSG00000107816_Q9BRK4	ENSG00000107816	Q9BRK4	10	0.9991868419019272	0.9993445916401499	-9.829432015222956e-05	0.12483555155813288	-0.14721961247340162	0.41585883685980196
ENSG00000107833_O75607	ENSG00000107833	O75607	10	0.2431419524023496	0.46960495989905027	-0.112215240027514	0.1745066394066844	-0.13040340696686656	0.492245500677772
ENSG00000107862_Q92538-3	ENSG00000107862	Q92538-3	10	0.3657863786286401	0.5975391203229591	-0.08706127347590369	0.16809894503802053	0.13235237616882353	0.4830210189582202
ENSG00000107863_Q5T5U3	ENSG00000107863	Q5T5U3	10	0.027819805300236623	0.11891934316936505	-0.20980089586525685	0.2944166762890729	-0.10086584483172097	0.6236882368742729
ENSG00000107872_A0A0C4DFV0	ENSG00000107872	A0A0C4DFV0	10	0.7476146420434228	0.8767380150583272	-0.031028174934990875	0.031589450481050704	-0.2051119304801426	0.19897937048339315
ENSG00000107874_Q9H467	ENSG00000107874	Q9H467	10	0.3372924003142149	0.5698398479618256	-0.09234672859256704	0.5907017625193111	-0.05183672526113495	0.8313203710831278
ENSG00000107882_Q9UMX1	ENSG00000107882	Q9UMX1	10	0.7541337884490329	0.8803234803959631	-0.03019998870692314	0.06394981866883814	0.17725522133240534	0.2919077298772145
ENSG00000107897_B7Z2R7	ENSG00000107897	B7Z2R7	10	0.008879793225682374	0.053119442950611745	-0.2484019702900249	0.4608851835008352	-0.07102992099257256	0.7560641448159668
ENSG00000107902_Q9H008	ENSG00000107902	Q9H008	10	0.005160924811475447	0.036640393195286655	-0.2649102642801602	0.38079688567321696	-0.08437896733448419	0.696569060429077
ENSG00000107929_Q92615	ENSG00000107929	Q92615	10	0.558296959974791	0.7522539462244265	-0.05641308206865282	0.7125193249711516	0.035527434237370474	0.8954992849093686
ENSG00000107937_Q9BZE4	ENSG00000107937	Q9BZE4	10	0.8936441423997632	0.9535234043737179	-0.012894037944706385	0.75632427571357	-0.029922206809178443	0.910259171010343
ENSG00000107938_Q3B7T1	ENSG00000107938	Q3B7T1	10	0.6485213249580756	0.8164274290957159	-0.04394144176850792	0.7881141225081217	-0.0259170507829233	0.9268696656484354
ENSG00000107949_Q9P287	ENSG00000107949	Q9P287	10	0.1634934715128607	0.36977191789859787	0.1337874111992349	0.8509276288562586	0.01812447018537437	0.9515499311214822
ENSG00000107949_Q9P287-2	ENSG00000107949	Q9P287-2	10	0.1634934715128607	0.36977191789859787	0.1337874111992349	0.17502134323887744	0.13024915822211608	0.493046053117084
ENSG00000107951_Q9NVV4	ENSG00000107951	Q9NVV4	10	0.15541450108079902	0.35805556643162784	-0.13637914324922634	0.07059165080638459	-0.17306880258039006	0.30636421926937224
ENSG00000107959_Q5JRX3	ENSG00000107959	Q5JRX3	10	0.4022978825372111	0.6338793976711328	0.08064589513879637	0.2499351910716593	-0.1106231659483014	0.5792636881349672
ENSG00000108010_O76003	ENSG00000108010	O76003	10	0.2722995606678387	0.5062589538454204	0.1055826832895808	0.25439632578421106	0.10959380835159728	0.5832723203198483
ENSG00000108021_Q5VWN6	ENSG00000108021	Q5VWN6	10	0.6327953174511781	0.8074034916522081	0.04605802812336125	0.0010497519910345487	-0.3083090970808353	0.02270506116073396
ENSG00000108039_Q9NQW7-3	ENSG00000108039	Q9NQW7-3	10	0.18214111036606212	0.3942138483665882	-0.12814889221981265	0.5611127327026909	0.05601055357924442	0.8182308594794988
ENSG00000108055_Q9UQE7	ENSG00000108055	Q9UQE7	10	0.8021691712525422	0.9050296883143106	-0.0241606382838109	0.1481249206736483	-0.1388056622197328	0.4548841044273207
ENSG00000108061_Q9UQ13	ENSG00000108061	Q9UQ13	10	0.07590668115511523	0.22768410280191997	0.16994258526194206	0.26645761063972645	0.1068712942647238	0.5957861967742016
ENSG00000108064_Q00059	ENSG00000108064	Q00059	10	0.9387482289249284	0.9718859340152673	-0.007411281032604407	0.26215450779709154	-0.10783277492013814	0.5925764915131152
ENSG00000108091_Q16204	ENSG00000108091	Q16204	10	0.04159801904161218	0.15177775535417706	-0.1946312525589396	0.1927039059242948	-0.12514080701135138	0.5145947561938775
ENSG00000108094_Q13617-2	ENSG00000108094	Q13617-2	10	0.15647686124229246	0.3594515500797848	-0.13603267815858605	0.03833213226960805	0.1977932466260625	0.22122129668388213
ENSG00000108106_Q16763	ENSG00000108106	Q16763	19	0.17464288351892893	0.38468799273032506	-0.1303625441685175	0.7340217295084819	-0.03276237409065109	0.9008436932701307
ENSG00000108107_H0YKD8	ENSG00000108107	H0YKD8	19	0.5659395962293929	0.7570159083853895	-0.05532276309314856	0.07193911572730094	-0.17225873031265776	0.30908247843667996
ENSG00000108175_Q9ULJ6	ENSG00000108175	Q9ULJ6	10	0.12674534140533986	0.316239361088156	0.14648651453278252	0.2389091622353855	0.113222880053239	0.5668341086221776
ENSG00000108179_P30405	ENSG00000108179	P30405	10	0.5242522913033886	0.7293146762933739	0.06136061279143295	0.07139916023206433	-0.17258185743602414	0.3078184143607587
ENSG00000108256_Q7Z417	ENSG00000108256	Q7Z417	17	0.5918676704585993	0.7767726729552987	-0.05167426166668898	0.4397368551492668	-0.07441597488993562	0.7415878005150327
ENSG00000108262_Q9Y2X7	ENSG00000108262	Q9Y2X7	17	0.8255963071514983	0.9186150202387519	-0.02125020660784557	0.4294149278057455	0.07610197158800125	0.7343670862742415
ENSG00000108270_Q9NY61	ENSG00000108270	Q9NY61	17	0.05837622588956004	0.19131577393190008	0.1810510258091053	0.8664489962033939	-0.016218666657686256	0.9566558988478157
ENSG00000108272_Q6UWP2	ENSG00000108272	Q6UWP2	17	0.0529441609452936	0.1788737990945072	-0.18504776557639346	0.4585806002319139	-0.07139464933236396	0.7541391580384349
ENSG00000108278_Q15649	ENSG00000108278	Q15649	17	0.8957305450900235	0.9542998679092353	0.012639645850067594	0.7028223469224855	0.03678375724501513	0.8918938102982255
ENSG00000108294_P49720	ENSG00000108294	P49720	17	0.5795058997481233	0.768348655275086	0.05340433011208175	0.4006120819526852	-0.08093422442318865	0.712688397324292
ENSG00000108296_Q9NXE8	ENSG00000108296	Q9NXE8	17	0.3109277192687925	0.5432231388769443	-0.09749554944707943	0.8270530456414635	-0.021069886815545863	0.9427487750696827
ENSG00000108298_P84098	ENSG00000108298	P84098	17	0.6646219571263787	0.8275749253301096	0.04179587361990271	0.8494586321812497	-0.018305192708768896	0.9512417061553278
ENSG00000108306_Q96IG2	ENSG00000108306	Q96IG2	17	0.44345065812003703	0.6682349950500559	-0.07381485795669854	0.3962268170227311	0.08168764069656398	0.7092006118601887
ENSG00000108312_P17480	ENSG00000108312	P17480	17	0.9441774581305294	0.9756929360202939	0.006753249178128612	0.09065818438853436	-0.16210273380085913	0.34785326802184485
ENSG00000108344_O43242	ENSG00000108344	O43242	17	0.4664241980501865	0.6871621615460305	0.07015739019827638	0.1842609859316164	0.12753518459545732	0.5057308808388752
ENSG00000108349_O15234	ENSG00000108349	O15234	17	0.0005483752184449474	0.007018094967371195	-0.3242648675292749	0.24628110138303216	0.11147577449934526	0.5752083463530308
ENSG00000108406_Q8IX18-3	ENSG00000108406	Q8IX18-3	17	7.265549502803957e-06	0.00025429423259813846	-0.41315118119462013	0.1950666852266618	-0.12448440355443074	0.5183439088706193
ENSG00000108424_Q14974	ENSG00000108424	Q14974	17	0.16640725109123272	0.3734614451951918	0.13287606870884772	0.03269579344869192	0.20382594553774747	0.20217109346749076
ENSG00000108433_E7EQ34	ENSG00000108433	E7EQ34	17	0.00029395306525029823	0.004245991822657514	0.3388099044368487	0.046810624158055814	0.18998945008620394	0.24762085743724652
ENSG00000108439_Q9NVS9	ENSG00000108439	Q9NVS9	17	0.5034954053482535	0.7145258496597638	0.06445659978792932	0.619577018358083	-0.04785417023001026	0.8497132047959495
ENSG00000108443_P23443-3	ENSG00000108443	P23443-3	17	0.649085558600742	0.8165833589799549	-0.0438658938792785	0.932087481234218	-0.008219043124652447	0.9793262924038708
ENSG00000108465_Q96JB5	ENSG00000108465	Q96JB5	17	0.7732586300916824	0.8900060722439694	-0.02778277038698742	0.9185439367772404	-0.009863310500467291	0.9760309209536404
ENSG00000108468_P83916	ENSG00000108468	P83916	17	0.005628585281540124	0.03896949481809474	-0.2623388502575797	0.1978090407216227	-0.12372971935367898	0.5213662946947276
ENSG00000108469_O94762	ENSG00000108469	O94762	17	0.22000276918217254	0.4420290335455322	-0.11788256112161954	0.9257560931398208	0.008987389657059657	0.9779450208209611
ENSG00000108479_P51570	ENSG00000108479	P51570	17	0.06113069679468223	0.19788603178043532	0.17913980731026002	0.58485862207924	-0.05265314562042744	0.8292183936806166
ENSG00000108506_J3KMZ7	ENSG00000108506	J3KMZ7	17	0.038892274355066064	0.14579687064704064	-0.1972352973167537	0.3435336570301293	-0.0911657659666934	0.6618490737790736
ENSG00000108510_Q9UHV7	ENSG00000108510	Q9UHV7	17	0.04687168126040465	0.1651976284746009	-0.1899376817748298	0.7747652733409057	0.027593092626841103	0.9199085121148494
ENSG00000108518_P07737	ENSG00000108518	P07737	17	0.7694378889179614	0.8883522920166366	0.028264257438754832	0.9817826283347809	-0.0022022990323779038	0.9954838728950384
ENSG00000108528_Q02978	ENSG00000108528	Q02978	17	0.5211545672421037	0.7267255521634882	0.061818622415639485	0.6361293422456394	-0.045607496687310886	0.8554368727637487
ENSG00000108559_Q99567	ENSG00000108559	Q99567	17	0.04589917794741487	0.1626237652667076	-0.1907689762592924	0.03854828873497046	-0.1975771318797698	0.22207014847625087
ENSG00000108561_I3L3Q7	ENSG00000108561	I3L3Q7	17	0.3515864904978103	0.5829783071322843	-0.08966180371615827	0.5492503345219362	0.05771299455966216	0.8085861045480901
ENSG00000108561_Q07021	ENSG00000108561	Q07021	17	0.3515864904978103	0.5829783071322843	-0.08966180371615827	0.2516159348377117	-0.11023388109449972	0.5816859179250744
ENSG00000108578_Q13867	ENSG00000108578	Q13867	17	0.024789854707289987	0.11067211386235523	0.2139792091209092	0.011731957748434234	0.23951054917701886	0.11134062420217734
ENSG00000108582_O75976	ENSG00000108582	O75976	17	0.2802242684633632	0.5124771191441703	-0.10386412578830354	0.17600785793748022	-0.12995444551879048	0.49327207090519537
ENSG00000108587_O95249	ENSG00000108587	O95249	17	0.5201567288685388	0.7261055646346134	-0.06196645022019213	0.684395883156558	-0.039188351539242834	0.8780773137394173
ENSG00000108588_Q96A33	ENSG00000108588	Q96A33	17	0.7889760560594828	0.8974814024434302	0.025809099262610442	0.2386909492703881	-0.11327516202834012	0.5667044851813374
ENSG00000108591_P55039	ENSG00000108591	P55039	17	0.5555114748138812	0.7505559709185613	0.056812239447142525	0.2701865658187216	0.10604658663427244	0.5980701937231273
ENSG00000108592_Q8IY81	ENSG00000108592	Q8IY81	17	0.7235531267695352	0.8633846408146554	-0.03410510489698916	0.1447344357128794	-0.13996498894221565	0.45095758520267776
ENSG00000108604_B9EGA3	ENSG00000108604	B9EGA3	17	0.4082447201561335	0.6387330951319105	-0.07963444100335958	0.09478755682603568	0.16009146193782428	0.35543907000147273
ENSG00000108651_Q9NYH9	ENSG00000108651	Q9NYH9	17	0.9484400972778976	0.9771292919589334	0.00623682868670881	0.8037805796905575	-0.023959780960924618	0.9343165293953387
ENSG00000108654_J3KTA4	ENSG00000108654	J3KTA4	17	0.5524431950580931	0.74844474779577	-0.05725303831009657	0.08447986506064317	-0.16525227400823128	0.33718256422335213
ENSG00000108666_J9JIC5	ENSG00000108666	J9JIC5	17	0.7275483989100687	0.8661941565674282	-0.033591904419908905	0.1889866793772169	0.12618540072917578	0.5103061575009239
ENSG00000108671_O00231	ENSG00000108671	O00231	17	0.8712951865560873	0.9419206496301729	0.015624934906758196	0.1716213821360748	0.13127433535124575	0.48882690692387254
ENSG00000108679_Q08380	ENSG00000108679	Q08380	17	0.3355068652215551	0.567994652907149	0.09268712602442107	0.059314774943054316	0.18039167231903144	0.2791847525975062
ENSG00000108773_Q92830	ENSG00000108773	Q92830	17	0.9818258463207664	0.9910558853476824	-0.002197073515488028	0.7638139532374747	0.02897425221744644	0.9153078447516033
ENSG00000108774_P51148	ENSG00000108774	P51148	17	0.9523829502846992	0.978982597572136	-0.005759307664882755	0.5387948944020103	0.0592283916463618	0.80193058309459
ENSG00000108784_P54802	ENSG00000108784	P54802	17	0.8979252761305964	0.9550632344337354	0.01237213895965338	0.29690123211072644	0.10035088369225753	0.625641214770169
ENSG00000108797_P78357	ENSG00000108797	P78357	17	0.2527080064431325	0.4830733919182995	-0.10998189909229067	0.2396657914851001	-0.11304185495196255	0.5677881139990943
ENSG00000108821_P02452	ENSG00000108821	P02452	17	0.0032584661882482037	0.0261295991171549	0.278151000991609	0.00033662706025234515	0.3357081086995566	0.01002009725995581
ENSG00000108826_Q9P0M9	ENSG00000108826	Q9P0M9	17	0.1595802729198844	0.36443440120672954	0.13503053780674534	0.13233512285472634	-0.14438839600814135	0.4301415477509091
ENSG00000108828_Q99536	ENSG00000108828	Q99536	17	0.0009633746937175123	0.01074468078292331	0.31047006058031457	0.004863015542090704	0.2666588151166076	0.06384309585476858
ENSG00000108829_Q96AG4	ENSG00000108829	Q96AG4	17	0.0003193385187101204	0.004546088800064299	0.3369183933348344	0.2041979342592338	0.1220003234597947	0.5290589914011063
ENSG00000108830_P52198	ENSG00000108830	P52198	17	0.0006528250797331079	0.007926425148366039	0.3200659252730907	0.004479914783882976	0.26905358859750617	0.06029061786881164
ENSG00000108840_Q9UQL6	ENSG00000108840	Q9UQL6	17	0.2711717484757362	0.5054934311846401	0.10582998815590164	0.24497924910887514	0.11178164579528804	0.5740077065806343
ENSG00000108848_J3KPP4	ENSG00000108848	J3KPP4	17	0.6613636891522062	0.8253014214810255	-0.04222839030550242	0.6139365818074431	-0.04862559454122227	0.8452348469930111
ENSG00000108852_B4DZ84	ENSG00000108852	B4DZ84	17	0.005095676073658034	0.03631170745401985	-0.2652853931725317	8.641264124716714e-06	-0.4100397653040648	0.0006150659775881696
ENSG00000108861_P51452	ENSG00000108861	P51452	17	0.0645709267610394	0.20457094623326133	0.17684913818304035	0.012847994345652342	0.2365427156816824	0.11757750254035558
ENSG00000108883_Q15029	ENSG00000108883	Q15029	17	0.8833268238139618	0.9487750811904795	0.01415334972361879	0.024459827757634844	-0.2144602538109604	0.170066082291126
ENSG00000108946_P10644	ENSG00000108946	P10644	17	0.11085070630063426	0.29037760039034105	0.15286963692239205	0.30939201043844633	0.09780400976737062	0.6365419782804874
ENSG00000108953_P62258	ENSG00000108953	P62258	17	0.521432881601786	0.7268616592369412	-0.061777416327411676	0.7519150467532776	0.030481605909241007	0.9086526673272016
ENSG00000108961_Q9HD47	ENSG00000108961	Q9HD47	17	0.05869583294085282	0.19216439363323132	0.1808255258553874	0.014634142101078603	0.2322308608407993	0.1265132446687038
ENSG00000108963_I3L1H5	ENSG00000108963	I3L1H5	17	0.6343640368442348	0.8087535064214586	-0.04584592176379482	0.361684618851184	-0.08780593864223557	0.6810557520166622
ENSG00000108984_P52564	ENSG00000108984	P52564	17	1.8357232048356482e-09	2.005052845281695e-07	-0.5343038872139249	0.0005247834629963766	-0.3253144787771078	0.014007345266478287
ENSG00000109016_A0A0C4DGQ8	ENSG00000109016	A0A0C4DGQ8	17	0.1668870361941267	0.3738434845437739	0.13272714389353782	0.9264351135430056	-0.008904960955092009	0.9779450208209611
ENSG00000109062_O14745	ENSG00000109062	O14745	17	0.0004371972816325549	0.005867891481233549	0.3296333109514525	0.008092846602906052	0.2512985237666337	0.08776431104911415
ENSG00000109083_Q8IY31-2	ENSG00000109083	Q8IY31-2	17	0.10421977287336724	0.27857901314463357	0.15574437080061632	0.11066768455111256	0.15294715831383032	0.38718579313731677
ENSG00000109084_J3KT68	ENSG00000109084	J3KT68	17	0.5724533903784695	0.7617263507244986	-0.05439898125391035	0.6440910356400668	0.044535565118220405	0.8581787704201482
ENSG00000109089_Q86X02	ENSG00000109089	Q86X02	17	0.7691190565899084	0.8882601911685466	0.028304467736181487	0.7500513495551957	-0.030718356812554932	0.9080552849909893
ENSG00000109103_Q13432	ENSG00000109103	Q13432	17	0.7309084019980759	0.8684202521058112	0.033161031703238926	0.7318712585752503	0.03303767971671912	0.9008436932701307
ENSG00000109107_P09972	ENSG00000109107	P09972	17	0.209076438726849	0.42961376559668774	-0.12070574280410055	0.8097146254364668	-0.0232209956591226	0.9364563803116097
ENSG00000109111_Q7KZ85	ENSG00000109111	Q7KZ85	17	0.7516276741518979	0.8789528239564236	0.03051809983695772	0.32319757959256185	-0.0950658032163746	0.6458254078717529
ENSG00000109113_Q9BZG1	ENSG00000109113	Q9BZG1	17	0.05480118234181547	0.18388002655476746	0.1836450126098193	0.18589434454675646	0.12706583113205944	0.5084894102227495
ENSG00000109133_P57088	ENSG00000109133	P57088	4	0.08439393284310143	0.24312667783585612	-0.16529735566562126	0.11043628479411073	-0.15304531390616685	0.3870103065596681
ENSG00000109171_Q9P270	ENSG00000109171	Q9P270	4	0.009011561802715574	0.05348903317934078	-0.24793924808066745	0.4309940581492665	0.07584254831550111	0.7343670862742415
ENSG00000109180_Q9NX40	ENSG00000109180	Q9NX40	4	0.18631335105819766	0.4000294510634252	-0.1269459125357578	0.02395012367144561	-0.21521420619744047	0.1675496010129418
ENSG00000109189_P62068-4	ENSG00000109189	P62068-4	4	0.005780068663008229	0.03962850106077612	-0.2615466491529576	0.8484489194488355	-0.01842944880752768	0.9505358128697518
ENSG00000109265_Q6ZU35	ENSG00000109265	Q6ZU35	4	5.529455204365014e-06	0.00020605352188030803	-0.41798864486735776	0.021735869935094968	-0.21865800911982214	0.16078519954297735
ENSG00000109270_Q9UHA4	ENSG00000109270	Q9UHA4	4	0.17978393889214286	0.3911566465666307	-0.12883746238398908	0.4350038801671433	-0.07518623592797226	0.7375952504898676
ENSG00000109320_P19838	ENSG00000109320	P19838	4	0.27430256150864296	0.5079528579822429	-0.1051451665389182	0.8135223205504393	-0.02274764949244444	0.9378946073602871
ENSG00000109323_O00462	ENSG00000109323	O00462	4	0.2760730129549688	0.5094065067607816	0.10476023402301964	0.3082695856974694	0.09803008989035923	0.6355889816472445
ENSG00000109332_H9KV45	ENSG00000109332	H9KV45	0	0.07275835909982434	0.22074914027652642	-0.17177218851427484	0.30022267749613424	0.09966688318488956	0.628164634115412
ENSG00000109381_Q15723-1	ENSG00000109381	Q15723-1	4	0.0006531324273791748	0.007926425148366039	0.3200545075134914	0.6656386846094164	0.041661078969720655	0.8699268162090538
ENSG00000109445_Q9Y3S2	ENSG00000109445	Q9Y3S2	4	0.9341653865369254	0.9703802023641841	0.00796699303143492	0.9774394299608622	-0.0027274732536370343	0.9938289618265898
ENSG00000109458_Q13480-2	ENSG00000109458	Q13480-2	4	0.0021779382168523233	0.019269886318099817	-0.28925104932521545	0.8021229444752964	0.024166401837215613	0.9335002345645698
ENSG00000109475_P49207	ENSG00000109475	P49207	4	0.9073464376928609	0.9587307065188391	0.011224871487409452	0.957197043658896	0.005176457797905922	0.9885985843350731
ENSG00000109501_O76024	ENSG00000109501	O76024	4	0.5540468148387496	0.7494953175322397	0.057022510179957984	0.04727041789890222	-0.18960097482261526	0.24861600743872547
ENSG00000109519_Q9HAV7	ENSG00000109519	Q9HAV7	4	0.5461106636026076	0.7439970247632892	-0.05816655821978677	0.10449438362802277	-0.1556225199911599	0.3767588672235872
ENSG00000109534_Q9NY12-2	ENSG00000109534	Q9NY12-2	4	0.459054921705709	0.6808974312820573	0.07131949961618912	0.18978039477418704	-0.12596111100872678	0.5114569663119235
ENSG00000109536_Q14331	ENSG00000109536	Q14331	4	0.07883486020819047	0.2330465886229056	0.1682949237287454	0.06508216166784768	0.17651726873870166	0.29384623884090516
ENSG00000109572_P51790-2	ENSG00000109572	P51790-2	4	0.3031995417638647	0.5354806515400288	-0.09905805862153433	0.7715449294512645	-0.027998644501617674	0.9185126961651738
ENSG00000109586_Q86SF2	ENSG00000109586	Q86SF2	4	0.002315497913694401	0.020204792401176352	-0.28759179313849115	0.0014643259539545413	-0.2997755210913362	0.028960319813775528
ENSG00000109606_O43143	ENSG00000109606	O43143	4	0.35326413282111035	0.5846207631718219	-0.0893512054772067	0.24572428600884705	0.11160646158171746	0.5751223150064575
ENSG00000109618_Q9HD40	ENSG00000109618	Q9HD40	4	0.28386998895575105	0.5166255841472122	-0.10308445134568432	0.7410730927610636	0.031861483255054814	0.9038178624033166
ENSG00000109654_Q9C040	ENSG00000109654	Q9C040	4	0.20805746699654126	0.4286746047066865	-0.12097434152497012	0.10874754538075818	0.15376654116457547	0.3839363654066889
ENSG00000109685_O96028	ENSG00000109685	O96028	4	4.0696846676336325e-05	0.0009478475135830538	-0.3807585876520382	0.21974263679982256	-0.11794860495935135	0.5483924801448716
ENSG00000109689_Q9P246-2	ENSG00000109689	Q9P246-2	4	0.9712516671403404	0.9871457261886822	0.003475831460453048	0.5006810544410157	-0.06488141017817446	0.7771656977826864
ENSG00000109736_Q14728	ENSG00000109736	Q14728	4	0.6765909418123494	0.8347558920434627	-0.040214082248413226	0.05678320592676461	-0.18219031311354592	0.2739105550955227
ENSG00000109756_Q9Y4G8	ENSG00000109756	Q9Y4G8	4	0.14176893306406635	0.33776088415226035	-0.14099594099793952	0.12944938151977406	-0.14546289559431558	0.4246045765569241
ENSG00000109775_Q9NUQ7	ENSG00000109775	Q9NUQ7	4	0.8256659708349571	0.9186150202387519	0.02124158174872981	0.9484450766768662	0.006236225536400799	0.9851277835341998
ENSG00000109805_Q9BPX3	ENSG00000109805	Q9BPX3	4	3.0084163491804385e-06	0.0001253836682372242	-0.42851021983959203	0.3897835165851061	-0.08280370856964005	0.7044945007255632
ENSG00000109814_O60701	ENSG00000109814	O60701	4	0.056615864429116425	0.1878792567618924	-0.18231150720073586	0.5341681487516241	-0.0599036092111865	0.7989449360034798
ENSG00000109832_Q9UHL0	ENSG00000109832	Q9UHL0	11	0.34553098746786604	0.5769738200369652	0.09079069471814387	0.8980629643674459	-0.012355359846984257	0.9688884653297211
ENSG00000109854_Q9BUP3	ENSG00000109854	Q9BUP3	11	0.127200695436772	0.3168762900479555	0.14631297446337851	0.3555723502272973	-0.08892536193799984	0.6745029539698153
ENSG00000109861_P53634	ENSG00000109861	P53634	11	0.02768619292097546	0.11842811084022928	-0.2099767754496724	0.8678000980650417	-0.016053076205539543	0.9566558988478157
ENSG00000109911_Q96EB1	ENSG00000109911	Q96EB1	11	0.014617890307122088	0.07573946852410504	-0.23226797670097996	0.26818704536425303	-0.10648784135315374	0.5970599211275949
ENSG00000109919_Q9Y6C9	ENSG00000109919	Q9Y6C9	11	0.9976694901286304	0.9984575386990322	-0.0002817117188303516	0.5004466626805011	-0.06491684646686269	0.7769901408461681
ENSG00000109920_Q8N3X1	ENSG00000109920	Q8N3X1	11	0.7865400778773951	0.8961747110347659	0.02611427234650609	0.10152831644543447	0.15695215027818374	0.37001725549779657
ENSG00000109971_P11142	ENSG00000109971	P11142	11	0.4336882229922153	0.6600951442130817	-0.07540119587369093	0.5217133485135623	-0.06173590282924413	0.7910903641811141
ENSG00000110002_O00534	ENSG00000110002	O00534	11	0.4137222568424378	0.6441215279176317	-0.07871043666726747	0.2570561719858688	0.10898596239602704	0.5861127703417824
ENSG00000110046_Q2TAZ0	ENSG00000110046	Q2TAZ0	11	0.3188302157693313	0.5524315433015994	0.09592370784120564	0.19809751430891534	0.12365077268759402	0.5216359962930968
ENSG00000110047_A0A024R571	ENSG00000110047	A0A024R571	11	0.02253361162112132	0.10284613085000256	0.21738403886971744	0.05534425165227813	-0.1832421853178649	0.27022505799123
ENSG00000110048_P22059	ENSG00000110048	P22059	11	0.17631544570584026	0.3870264547978164	0.12986280480262782	0.006402514344542687	0.2584738151913836	0.07609370480731067
ENSG00000110060_Q9BZE2	ENSG00000110060	Q9BZE2	11	0.1409415355867005	0.33662131300333054	-0.1412864945903507	0.6723033367414678	0.040779472417749416	0.8734080663487818
ENSG00000110063_Q96C86	ENSG00000110063	Q96C86	11	0.8224722896630176	0.9165104582260715	-0.021637155619765067	0.6346349572410083	0.045809312853949305	0.8542781274444675
ENSG00000110074_Q96CU9	ENSG00000110074	Q96CU9	11	0.6304988878345904	0.8060969635584521	0.04636892587357681	0.048596755773621145	-0.18849765335055493	0.25240619166888517
ENSG00000110075_Q5H9R7-5	ENSG00000110075	Q5H9R7-5	11	0.21701119116665527	0.4387560305786945	-0.11864544525480385	0.4217799742932904	0.07736405523913166	0.7296066255100288
ENSG00000110090_P50416	ENSG00000110090	P50416	11	0.19836687490523025	0.4161106465313356	-0.12357713150232495	0.15195783505473098	-0.1375188780267902	0.4596042924271042
ENSG00000110104_Q9H6F5	ENSG00000110104	Q9H6F5	11	0.0464648657147036	0.1640647235975933	0.19028366884183145	0.8693575364115338	0.015862255102273938	0.9573591126332426
ENSG00000110107_Q9UMS4	ENSG00000110107	Q9UMS4	11	0.27721169701163745	0.5096781791133393	-0.10451353731266123	0.09517332005511726	-0.15990713314879662	0.3563298002764939
ENSG00000110108_Q9BVC6	ENSG00000110108	Q9BVC6	11	0.018743203737532483	0.09070908760677486	-0.2238263827634434	0.0020379694121236856	-0.29103959055366	0.036219294849261285
ENSG00000110171_O75382	ENSG00000110171	O75382	11	0.222935428721714	0.44495776337493953	-0.11714179300685312	0.4879362586462299	0.06682104708013484	0.7724156730463558
ENSG00000110172_Q9UHD1	ENSG00000110172	Q9UHD1	11	0.18346025602205315	0.3963917878239109	0.1277663880289105	0.6098806429868244	0.04918221588750492	0.8423664077131516
ENSG00000110315_E9PLX2	ENSG00000110315	E9PLX2	11	0.2084237748095672	0.4288290397592102	-0.12087767557143556	0.7477220076584118	0.031014517170079938	0.9068358919083275
ENSG00000110321_P78344	ENSG00000110321	P78344	11	0.030875646830274044	0.12608182205075316	-0.20596199699525047	0.0004560575992084548	-0.32864000801005083	0.012592693881592076
ENSG00000110330_E9PMH5	ENSG00000110330	E9PMH5	11	0.3946777742074024	0.6271090292460231	0.08195496073198953	0.15847086612061842	0.1353870977019665	0.4703425336198049
ENSG00000110344_Q14139	ENSG00000110344	Q14139	11	0.08119805634334057	0.23757453491952385	0.1670006105359662	0.023125772409197675	0.21646314190844454	0.16460565990804055
ENSG00000110367_P26196	ENSG00000110367	P26196	11	0.3397447904957335	0.5725680361240946	-0.09188105677626518	0.2804752672543476	0.10381023033179967	0.6092228669022167
ENSG00000110395_P22681	ENSG00000110395	P22681	11	0.7863297203963091	0.8961747110347659	0.026140637452136545	0.05541480754871465	0.1831900884864331	0.27036348602975324
ENSG00000110400_Q15223	ENSG00000110400	Q15223	11	0.6140778121016071	0.7932232303226651	-0.04860624155883735	0.8602263053227238	-0.01698193369344422	0.9540490596569868
ENSG00000110429_E9PJM3	ENSG00000110429	E9PJM3	11	0.11968081048788552	0.3049697807577606	-0.14924235779221662	0.8704251089057707	-0.0157314889566865	0.9580658501117469
ENSG00000110435_O00330-3	ENSG00000110435	O00330-3	11	0.009167909085325374	0.05430844625361308	0.2473978798066119	0.6791781747465505	0.0398735740134181	0.8766502896285316
ENSG00000110442_Q9P000	ENSG00000110442	Q9P000	11	0.7798631679211733	0.8940483397271208	0.026952072510216463	0.5471524611662597	-0.05801591724690153	0.8079895496152742
ENSG00000110492_E9PPJ5	ENSG00000110492	E9PPJ5	11	0.3615139882191649	0.5937621670914417	-0.08783702890493683	0.8967207262142729	-0.012518944926774156	0.9684768523497281
ENSG00000110497_Q9C0C7-4	ENSG00000110497	Q9C0C7-4	11	0.501619107156852	0.7134613928690295	-0.06473967829380445	0.9364672836098146	-0.0076878352730048545	0.9810317937537976
ENSG00000110514_A0A0A0MRB5	ENSG00000110514	A0A0A0MRB5	11	0.8952789551839185	0.9542820339802346	-0.01269470014794351	0.007447870320758955	0.25386426204099083	0.08319628067611952
ENSG00000110536_Q8WUK0	ENSG00000110536	Q8WUK0	11	0.6573505814564125	0.8226621757262689	0.0427622641020443	0.07314179731015509	-0.17154598542975488	0.3107071310138286
ENSG00000110583_Q86UY6	ENSG00000110583	Q86UY6	11	0.5925318619784636	0.7773719354114687	0.05158177461367637	0.047977126695621375	0.1890099484533652	0.2508909988670616
ENSG00000110619_P49589-3	ENSG00000110619	P49589-3	11	0.047666211495025326	0.16692396341679683	0.189269074260698	0.07118481932301841	0.1727106737201826	0.3078184143607587
ENSG00000110651_E9PIF1	ENSG00000110651	E9PIF1	11	0.0109266096061421	0.061693468676390556	0.24180966111592397	0.4382817914304105	-0.07465227420078129	0.7404095875272179
ENSG00000110696_E9PM92	ENSG00000110696	E9PM92	0	0.4216828331609282	0.6503239068897403	-0.07738019749709772	0.2542643193598427	0.1096240885946649	0.5831783851840862
ENSG00000110697_O00562-2	ENSG00000110697	O00562-2	11	0.13545333496577494	0.32882500546770543	0.14324726693670972	0.05901268681909641	0.18060295865736295	0.2781716495681616
ENSG00000110700_P62277	ENSG00000110700	P62277	11	0.4494235681937896	0.6725649021197762	-0.07285399502305616	0.3752830521083899	0.08535663829204539	0.6917899074318962
ENSG00000110711_O00170	ENSG00000110711	O00170	11	0.7058900081705489	0.8537253153418151	0.0363856598252532	0.012238981230361757	0.2381329719248231	0.1140957416980166
ENSG00000110713_P52948-5	ENSG00000110713	P52948-5	11	0.6146998915844734	0.7935854520455754	-0.04852102015370709	0.9635524309130198	0.0044072830012692535	0.9901374514643575
ENSG00000110717_O00217	ENSG00000110717	O00217	11	0.2810357275066965	0.5136645509968039	-0.10369000255528392	0.0031424555790219373	-0.2791681591921613	0.0482747492547111
ENSG00000110721_P35790	ENSG00000110721	P35790	11	0.7931588102239141	0.8989412253331813	0.025285686897308386	0.3100664166359322	-0.09766842700904847	0.637018257968803
ENSG00000110756_Q9UPZ3-2	ENSG00000110756	Q9UPZ3-2	11	0.02157502824547084	0.09954683462130938	-0.21891971623738335	0.12749529239616827	-0.1462009543425217	0.4201810816016859
ENSG00000110768_P32780	ENSG00000110768	P32780	11	0.5527978160224876	0.7486049945494782	0.05720203199745026	0.03296806174564888	0.20351511211476697	0.20326602843371197
ENSG00000110811_Q8IVL6	ENSG00000110811	Q8IVL6	12	0.5107324008630062	0.7197974993252825	-0.06336984850674443	0.9009962880971376	0.011997982764805909	0.9697214753948696
ENSG00000110841_Q86W92	ENSG00000110841	Q86W92	12	0.4185212199206664	0.6477941893563864	0.07790675294319857	0.35666837149944924	0.08872375896374637	0.6752056679917108
ENSG00000110844_F8VU11	ENSG00000110844	F8VU11	12	0.07122088554111664	0.2174382216399874	-0.172688976444631	0.9861088833494572	0.0016792376034973676	0.996589006143331
ENSG00000110871_Q5HYK3	ENSG00000110871	Q5HYK3	12	0.394082543825783	0.6264775194821418	0.08205784663349601	0.13334220318571116	-0.1440176268455853	0.43223117780085357
ENSG00000110880_Q9ULV4-3	ENSG00000110880	Q9ULV4-3	12	2.0788000802331452e-05	0.0005879106476909363	0.3937934110636411	0.3886757857699379	0.08299669238397857	0.7035686370049935
ENSG00000110906_Q9H3F6	ENSG00000110906	Q9H3F6	12	0.5264205357984143	0.7308512150521487	0.06104084353231962	0.4108415244684298	0.07919548763054657	0.7201909299312239
ENSG00000110917_Q14165	ENSG00000110917	Q14165	12	0.8864535381678902	0.9495575184804843	0.013771467420744523	0.1388277958160869	-0.14203468529784302	0.44155377342042423
ENSG00000110921_F5H8H2	ENSG00000110921	F5H8H2	12	0.5678882777713984	0.7580219636919108	0.05504587963304991	0.5886175535300858	-0.05212751276350767	0.829894076016661
ENSG00000110931_Q96RR4-2	ENSG00000110931	Q96RR4-2	12	0.0839817635058873	0.24246428296254663	-0.16551409802824785	0.9882370837795172	-0.0014219485238400216	0.996589006143331
ENSG00000110955_F8W0P7	ENSG00000110955	F8W0P7	12	0.12340401563361852	0.3107171856275729	-0.14777480049295735	0.7855732195690182	-0.02623546925285321	0.9253806429365166
ENSG00000110955_P06576	ENSG00000110955	P06576	12	0.12340401563361852	0.3107171856275729	-0.14777480049295735	0.961452519120021	-0.004661396529496036	0.9899087037864146
ENSG00000110958_Q15185-4	ENSG00000110958	Q15185-4	12	0.4267629229231354	0.6543910888061175	-0.07653888256292803	0.9082041215980592	-0.011120506678414088	0.9729022747420012
ENSG00000111011_Q7L4I2-2	ENSG00000111011	Q7L4I2-2	12	0.9873865358120888	0.9935279101968552	0.0015247743376972205	0.932680058198174	-0.008147157919771695	0.9796864060114019
ENSG00000111052_O14910	ENSG00000111052	O14910	12	0.9657030891551178	0.9842023019164373	0.004147059819575829	0.3867155510814048	-0.08333900661117268	0.7017846516225154
ENSG00000111057_P05783	ENSG00000111057	P05783	12	0.469056858494019	0.6891176248978689	0.06974467225139425	0.13078087624711873	0.14496486412506845	0.4269472964453574
ENSG00000111058_A0A0B4J1R2	ENSG00000111058	A0A0B4J1R2	12	0.5944343884918979	0.7786309020089474	-0.05131711138681586	0.2646916411262826	0.10726459425336902	0.5947375440868392
ENSG00000111110_Q9ULR3	ENSG00000111110	Q9ULR3	12	0.22693858796602898	0.4498297730803484	-0.11614163998398006	0.5956333839107281	-0.051150513550857285	0.8343799874109116
ENSG00000111142_P50579	ENSG00000111142	P50579	12	0.8863714507897618	0.9495575184804843	-0.013781490443130087	0.6156461827075088	0.04839145530259239	0.8468536136996325
ENSG00000111144_P09960	ENSG00000111144	P09960	12	0.8598943194516552	0.9367894262641849	-0.01702268371279099	0.791344718203854	0.025512603668246675	0.9280136702829435
ENSG00000111196_Q96A72	ENSG00000111196	Q96A72	12	0.2257884684571565	0.4476901244682587	0.1164277063219447	0.16929302963077447	-0.13198507160990886	0.48436406780470803
ENSG00000111229_O15145	ENSG00000111229	O15145	12	0.11123931720251333	0.2904785962398689	0.15270536522252173	0.3786515006932169	0.0847583424111031	0.6954247458259023
ENSG00000111231_Q9UHW5-2	ENSG00000111231	Q9UHW5-2	12	0.9191958886884446	0.9636117747544757	-0.0097840986137377	0.026379218467680758	0.21173639352431453	0.1777473542042426
ENSG00000111237_Q9UBQ0	ENSG00000111237	Q9UBQ0	12	0.08980406131123643	0.25281640062538174	0.16252777625809803	0.4399736458355706	0.07437756248225727	0.7415878005150327
ENSG00000111247_Q96B01	ENSG00000111247	Q96B01	12	0.7829963396734841	0.894873139424774	-0.02655868470188477	0.4179979640663891	0.07799412153161317	0.7262718323915933
ENSG00000111271_Q6JQN1-5	ENSG00000111271	Q6JQN1-5	12	0.4407288001293256	0.6660614127651476	-0.07425513869314389	0.8905501909343124	-0.013271442475600605	0.9668217185124266
ENSG00000111275_P05091	ENSG00000111275	P05091	12	0.019977950743771775	0.09451853469887542	0.2216135517800348	0.249403392161968	0.110746713656872	0.5784497212851437
ENSG00000111300_Q14CX7	ENSG00000111300	Q14CX7	12	0.5065569179816415	0.7163031418334149	-0.06399588316681144	0.000564392956776063	0.3235756185515135	0.01452564814456568
ENSG00000111358_Q13889	ENSG00000111358	Q13889	12	0.5440699797476133	0.743140000366781	0.05846204311433033	0.1419683054277737	0.1409261204222092	0.4464648819687375
ENSG00000111361_Q14232	ENSG00000111361	Q14232	12	0.6580117146645956	0.8233269232471289	-0.04267422322575624	0.4922919668314965	0.06615517410687669	0.7740223750561093
ENSG00000111364_Q8NHQ9	ENSG00000111364	Q8NHQ9	12	0.8014181423779524	0.9045045309040315	-0.02425428710358359	0.13856867771482428	-0.14212699786414265	0.44155377342042423
ENSG00000111371_F8VX04	ENSG00000111371	F8VX04	12	0.406823069097481	0.6371382305890091	-0.07987544576041868	0.542852536495834	-0.058638583978865816	0.8046242938964996
ENSG00000111445_P40937	ENSG00000111445	P40937	12	0.3965580266457807	0.6286437799383758	-0.08163056429961271	0.30361980963219515	-0.09897242228596208	0.6319000976295783
ENSG00000111481_F8VVA7	ENSG00000111481	F8VVA7	12	0.6646726472106705	0.8275749253301096	0.04178915137393295	0.06131933980200133	0.17901150950641256	0.28402869903949424
ENSG00000111530_Q86VP6	ENSG00000111530	Q86VP6	12	0.024971470770503188	0.11084570547488555	-0.21371681556593394	0.3795369687359318	0.08460160481328867	0.6955052317681434
ENSG00000111540_P61020	ENSG00000111540	P61020	12	0.337644579810829	0.5702086884577429	-0.09227972349407876	0.88876873039484	-0.013488838111836071	0.966323353385164
ENSG00000111581_P57740	ENSG00000111581	P57740	12	0.0007555256220655509	0.008782338771969442	-0.3165001140048105	0.759075371576264	0.029573678936629974	0.9116304518780554
ENSG00000111596_Q9NZN8	ENSG00000111596	Q9NZN8	12	0.00024701166914972104	0.0037356143449587607	-0.3427442608492637	0.3653807681492712	-0.08713468108934737	0.6847949680410272
ENSG00000111602_Q9UNS1-2	ENSG00000111602	Q9UNS1-2	12	0.0965323051751566	0.2650767894601721	-0.15926243463451684	0.06628470901963901	-0.17574491008086968	0.2967294521172659
ENSG00000111605_Q16630-2	ENSG00000111605	Q16630-2	12	0.023930097637188983	0.10766844355936946	-0.2152441077114596	0.8718948968950672	0.015551502343016088	0.958434120846987
ENSG00000111615_Q13601	ENSG00000111615	Q13601	12	0.9402647697132626	0.9729789800936814	-0.007227440752121922	0.3525326303068764	-0.08948652222748886	0.6711215541592424
ENSG00000111640_P04406	ENSG00000111640	P04406	12	0.4021042028601252	0.6338793976711328	-0.08067898456053653	0.10705185068893804	-0.1544995833724971	0.3814094302076402
ENSG00000111641_P46087	ENSG00000111641	P46087	12	0.6442964437233742	0.8128893527937816	0.044507982124489504	0.6311668575719578	-0.04627844509253423	0.8539453652426771
ENSG00000111642_F5GWX5	ENSG00000111642	F5GWX5	12	0.8388734086042124	0.9259911210154532	0.019609350218406058	0.840048657194979	-0.01946438280709289	0.9474576615036043
ENSG00000111647_A0JNW5	ENSG00000111647	A0JNW5	12	0.7265491191747574	0.8653296991863297	0.03372017526490309	0.17030622871703366	0.1316749077303246	0.48633068976868876
ENSG00000111652_Q9UBW8	ENSG00000111652	Q9UBW8	12	0.9023115623794372	0.9568369179232901	-0.01183779132810378	0.2928221446257477	-0.1011978497738242	0.6223684998249966
ENSG00000111665_Q99618	ENSG00000111665	Q99618	12	0.08412932638146213	0.2425850171263371	-0.1654364036152605	0.1103280467672845	-0.15309128151119988	0.3870103065596681
ENSG00000111667_P45974-2	ENSG00000111667	P45974-2	12	0.1606365356137919	0.3656602418661055	-0.13469277217244904	0.7159969501063789	0.03507833630944647	0.8963771637044657
ENSG00000111669_P60174-1	ENSG00000111669	P60174-1	12	0.08594080705125995	0.246350684465942	0.1644913759456413	0.10430926409657283	0.1557046339937504	0.3765537224612609
ENSG00000111674_P09104	ENSG00000111674	P09104	12	0.15491361222338146	0.3573844622851863	0.13654311210501244	0.42028119431763616	0.0776133522652013	0.7285433358875356
ENSG00000111676_P54259	ENSG00000111676	P54259	12	0.2840727732853415	0.5167777249157033	0.10304128080522784	0.044654775620009024	0.19185429832529188	0.24160345660623125
ENSG00000111678_Q99622	ENSG00000111678	Q99622	12	0.3962648819733167	0.6286437799383758	-0.08168107962956546	0.2207953090813572	-0.11768168665034345	0.5486480798972747
ENSG00000111679_P29350	ENSG00000111679	P29350	12	0.0002710479728500366	0.004014103094814963	0.3406508492994595	0.0006183540399129986	0.3213788781472047	0.01546761308273852
ENSG00000111684_Q6P1A2	ENSG00000111684	Q6P1A2	12	0.233564909665338	0.4576658529940972	0.1145130147405122	0.8339056713766138	-0.020222609774190773	0.9449849161221631
ENSG00000111696_Q86UY8	ENSG00000111696	Q86UY8	12	0.21311404997452787	0.4346604446419188	-0.11965053228821902	0.019265007935836482	-0.22287635618365945	0.150135816103368
ENSG00000111707_Q9H7L9	ENSG00000111707	Q9H7L9	12	0.10474855045894532	0.27940297564522887	-0.15550996383715246	0.0989861211827398	-0.15811626030241485	0.3645277073445279
ENSG00000111716_P07195	ENSG00000111716	P07195	12	3.0663710884498715e-05	0.0007739227428418301	-0.3863184186618233	0.15771011828765985	-0.13563267803709364	0.4695092633451168
ENSG00000111725_Q9Y478	ENSG00000111725	Q9Y478	12	0.7713265089768292	0.8889164071173042	-0.02802616875804123	0.29567320699463084	0.10060505309507316	0.6244914487331372
ENSG00000111726_Q8NFW8	ENSG00000111726	Q8NFW8	12	0.00035199982606263	0.004858211106986407	-0.3346791729264788	0.0015774406598665365	-0.2978324115631968	0.03025474511109291
ENSG00000111731_Q86YS7-3	ENSG00000111731	Q86YS7-3	12	0.0027541782201749693	0.022777701076773408	-0.2828374113828278	0.15742922485060898	-0.1357235781440174	0.4691422014802854
ENSG00000111737_Q15286	ENSG00000111737	Q15286	12	0.06984234397801517	0.21457383564535698	0.1735246966700177	0.98347723417745	0.0019974076789007296	0.9958581699610325
ENSG00000111752_P78364	ENSG00000111752	P78364	12	0.06456629491034485	0.20457094623326133	-0.17685215471790844	0.10843566554585443	-0.15390069279701915	0.3837616484679334
ENSG00000111785_B7WPL0	ENSG00000111785	B7WPL0	12	0.041362008138634616	0.1513238022896942	-0.19485266306630947	0.4463092217465266	-0.07335409991748973	0.7480123280786625
ENSG00000111786_Q13242	ENSG00000111786	Q13242	12	0.3094990859410701	0.5416833463325779	-0.09778247043966104	0.03039854717365884	-0.20653949570379504	0.19395726413790687
ENSG00000111790_Q9NVK5	ENSG00000111790	Q9NVK5	12	0.223471667820076	0.44560686674226674	-0.1170070882298824	0.3944480702772388	-0.08199465420798613	0.7081934804360964
ENSG00000111799_Q99715	ENSG00000111799	Q99715	6	0.4324854857734635	0.6591725776434666	0.07559803176304307	0.7359319798796617	-0.03251804262675825	0.9012660600223522
ENSG00000111802_O95551	ENSG00000111802	O95551	6	0.7483451271612858	0.8767687866348794	-0.03093526349401108	0.7417266140697472	0.03177812852346278	0.9038178624033166
ENSG00000111817_Q9UL01	ENSG00000111817	Q9UL01	6	4.818809299284336e-05	0.0010673831087750442	-0.3773914746949162	0.012312371048931887	-0.23793772163974186	0.11447467190051912
ENSG00000111832_E5RGQ3	ENSG00000111832	E5RGQ3	6	0.3272222585500893	0.5607122012212107	0.0942817878468143	0.4320651803144079	0.07566689117849952	0.7351419774486313
ENSG00000111845_Q9NWT1	ENSG00000111845	Q9NWT1	6	0.1978155895513266	0.41538021919151896	0.12372792621221634	0.9730596826757976	-0.0032571477303804178	0.9927409344196781
ENSG00000111846_Q8N0V5-2	ENSG00000111846	Q8N0V5-2	6	0.8514474692904241	0.9336887169733143	0.018060532161882508	0.7152625589905091	-0.03517311218944657	0.8963771637044657
ENSG00000111875_Q9Y294	ENSG00000111875	Q9Y294	6	0.2740581498456162	0.5077971276022167	-0.10519843793470177	0.5188848495587994	-0.06215508582894834	0.789901670209195
ENSG00000111880_O60942	ENSG00000111880	O60942	6	0.20240248157718654	0.42109022029276744	-0.1224823529496816	0.9616756864346512	0.004634389227588985	0.9899087037864146
ENSG00000111906_Q7Z4H3	ENSG00000111906	Q7Z4H3	6	0.003855893762555627	0.02960859028580594	-0.2733777692283045	0.6802265455356211	-0.039735736775208925	0.8771851097921521
ENSG00000111907_E9PPQ1	ENSG00000111907	E9PPQ1	6	0.00018701573671814868	0.003069286767122984	-0.3489305687953198	0.0665626978783151	-0.17556798849604308	0.29714330495364916
ENSG00000111912_Q8NI08	ENSG00000111912	Q8NI08	6	0.037442185283434966	0.14211877997037778	-0.19869392923780724	0.9234629137934219	0.009265815058976012	0.9774790855519928
ENSG00000111913_Q9Y4F9	ENSG00000111913	Q9Y4F9	6	0.033699558958814366	0.13317947972806551	-0.20269060418104604	0.1453741857846134	-0.13974467864998205	0.4519966205940307
ENSG00000111961_O94885	ENSG00000111961	O94885	6	0.6159305893245871	0.7945909625811717	-0.04835253162131256	0.975160297903434	0.00300309403843195	0.993410445516232
ENSG00000112029_Q9UKT4	ENSG00000112029	Q9UKT4	6	0.020986100918442125	0.09775510979289034	-0.2198924871877796	0.9832914161624888	0.002019874107660812	0.9958581699610325
ENSG00000112062_Q16539	ENSG00000112062	Q16539	6	0.3913488683458984	0.6232421332914865	-0.08253155991277511	0.05811184582687425	0.18123832563387848	0.27636561571414736
ENSG00000112079_Q15208	ENSG00000112079	Q15208	6	0.6288076646519692	0.8049093868600171	0.04659819353622233	0.1882031456299509	0.12640748598840473	0.5097228092078279
ENSG00000112081_P84103-2	ENSG00000112081	P84103-2	6	0.3210917192243709	0.5544061164585418	0.09547853014103236	0.06708758797211305	-0.17523556009575555	0.29814154257790015
ENSG00000112096_P04179-4	ENSG00000112096	P04179-4	6	0.1669830456742478	0.3739263323953198	-0.1326973807606164	0.19764776395680786	-0.1237738922232339	0.5213662946947276
ENSG00000112110_Q9H0U6	ENSG00000112110	Q9H0U6	6	0.7871791841454878	0.896580390428203	0.02603418191358613	0.035399823638630826	-0.2008309232924653	0.21073524010963934
ENSG00000112118_P25205	ENSG00000112118	P25205	6	0.1306690449099457	0.3213140018702399	0.145006543819368	0.5494497834995061	-0.05768422444403575	0.8085861045480901
ENSG00000112159_Q9NU22	ENSG00000112159	Q9NU22	6	0.06953456687982346	0.21404347968108922	-0.17371310215724692	0.00017630112006740067	-0.35022609555702755	0.0061379618214770035
ENSG00000112186_P40123	ENSG00000112186	P40123	6	0.0010997557614779141	0.011828442697729348	-0.30713118709573073	0.17582986285417665	-0.13000753001971938	0.49327207090519537
ENSG00000112200_E9PH99	ENSG00000112200	E9PH99	6	0.5036539270420283	0.714550062060362	0.06443270870381602	0.2408204737874885	0.11276635902001693	0.5687613793513525
ENSG00000112208_O95816	ENSG00000112208	O95816	6	0.003738015737728625	0.028949058311137945	-0.2742643413803202	0.013549176825341751	-0.23479126740787185	0.12139304439599896
ENSG00000112210_Q9ULC3	ENSG00000112210	Q9ULC3	6	0.01175478222541918	0.06500775007077376	-0.23944742675213204	0.5067745944409063	-0.06396318088803674	0.7815550767582625
ENSG00000112249_Q8N3C0	ENSG00000112249	Q8N3C0	6	0.3615997538498472	0.5937621670914417	-0.08782140058917529	0.13096338393929555	0.1448969017589402	0.4269472964453574
ENSG00000112282_Q5JWT2	ENSG00000112282	Q5JWT2	6	0.0055435613496642505	0.03842282401545189	-0.26279184077872786	0.7901206106999068	0.02566580057392915	0.9276965968005138
ENSG00000112290_Q92558	ENSG00000112290	Q92558	6	0.2879314039898125	0.5201156100015575	0.10222370742582534	0.8876020284820864	-0.013631249937103577	0.9660440956148372
ENSG00000112294_P51649	ENSG00000112294	P51649	6	0.10228548987861866	0.27489811041409834	-0.15660985787426696	0.4528292557491591	-0.07230931940639762	0.7517036051643206
ENSG00000112297_A0A0J9YWL0	ENSG00000112297	A0A0J9YWL0	6	0.6941887777448349	0.8457088282718325	-0.03790751004022663	0.6857095553629853	-0.03901614051832057	0.8795436779362406
ENSG00000112304_Q9NPJ3	ENSG00000112304	Q9NPJ3	6	0.7145938141058535	0.8589644636835736	-0.03525944535799954	0.5730794690851486	-0.054310451962740716	0.8242359853972748
ENSG00000112305_Q8IYB5-3	ENSG00000112305	Q8IYB5-3	6	0.2986759051000768	0.5306712354301268	-0.0999847940076298	0.5395440147152787	0.05911933714397466	0.80193058309459
ENSG00000112306_P25398	ENSG00000112306	P25398	6	0.25228248246294543	0.4825511855080795	-0.1100799943057834	0.9812784997297448	0.002263254049172693	0.9954838728950384
ENSG00000112312_E2QRF9	ENSG00000112312	E2QRF9	6	0.8267006852683318	0.9191686232053882	0.021113496435409183	0.30714790207547393	-0.098256557749545	0.6347935338400178
ENSG00000112335_O60493	ENSG00000112335	O60493	6	0.8271660251407221	0.9191944836366466	0.021055904891796297	0.7522858630997802	0.03043452168370151	0.9086557240105607
ENSG00000112339_Q9Y450	ENSG00000112339	Q9Y450	6	0.05143027315142629	0.1752578407652607	-0.18622163848848253	0.1435881288585382	0.1403615891645607	0.4489143745572453
ENSG00000112339_Q9Y450-2	ENSG00000112339	Q9Y450-2	6	0.05143027315142629	0.1752578407652607	-0.18622163848848253	0.5837645406607117	0.05280642757337302	0.8281678945390377
ENSG00000112367_Q92562	ENSG00000112367	Q92562	6	0.045261335731804325	0.16099413916955663	0.1913221808932493	0.14059512215136696	-0.14140852711674393	0.4444286268253825
ENSG00000112514_O60888-3	ENSG00000112514	O60888-3	6	0.08336705442000011	0.24159665587863713	0.1658389303752699	0.793552821902197	0.02523642000603222	0.9292792003468647
ENSG00000112531_Q96PU8-9	ENSG00000112531	Q96PU8-9	6	0.3754894387911553	0.6066337406952965	-0.08531988664027026	0.6115335286801433	-0.048955185791263935	0.8437564631485552
ENSG00000112578_Q13895	ENSG00000112578	Q13895	6	0.910168811094428	0.9598667252011323	-0.010881487255660424	0.9809539951413446	-0.002302490901444441	0.9954049252139163
ENSG00000112584_A0A0D9SEJ5	ENSG00000112584	A0A0D9SEJ5	6	0.7240117052240507	0.8635987875884021	-0.034046151423585816	0.29789252271016164	0.10014621743005896	0.625945050171055
ENSG00000112640_Q14738	ENSG00000112640	Q14738	6	0.001116132361029966	0.01192360625147527	-0.3067560183148683	0.8505096890939964	0.01817588058355484	0.9515499311214822
ENSG00000112651_Q5T653	ENSG00000112651	Q5T653	6	0.4931670933673455	0.7086878895678973	-0.06602176726552147	0.3303848279317214	-0.0936700353134798	0.652619552183351
ENSG00000112655_Q13308-6	ENSG00000112655	Q13308-6	6	0.4152760824870185	0.6455786630028603	0.07844962565212213	0.006801042004915694	-0.25664288088759	0.07864165177525259
ENSG00000112667_H0Y8X4	ENSG00000112667	H0Y8X4	6	0.5865615386144827	0.7728509457410041	-0.05241482640303796	0.5089746735124192	0.06363306287499447	0.7816187265686239
ENSG00000112685_Q96KP1	ENSG00000112685	Q96KP1	6	0.5556149960021506	0.7505559709185613	-0.05679738776624175	0.0014104430433614574	0.3007495650527525	0.028235306674292176
ENSG00000112695_D6RIE3	ENSG00000112695	D6RIE3	6	0.6373109897996572	0.8098716790093384	-0.04544805522432308	0.4638914952748293	0.07055564289867661	0.7575216425402318
ENSG00000112697_Q9NV96	ENSG00000112697	Q9NV96	6	0.9028484158201332	0.9569256674285669	-0.011772415519318222	0.3531950258324287	0.08936398173132877	0.6721828091154302
ENSG00000112699_O60547	ENSG00000112699	O60547	6	0.18371126172802568	0.39661815067700357	0.12769383326922693	0.1730110417395572	0.130853523792336	0.4901004170584816
ENSG00000112701_Q9GZR1-2	ENSG00000112701	Q9GZR1-2	6	0.28505290635477865	0.5178692749519709	0.10283291071623604	0.4902816028000057	0.0664621158537462	0.7738070036692866
ENSG00000112739_Q13523	ENSG00000112739	Q13523	6	0.1325004064419063	0.32383876342958196	-0.14432739736788347	0.5223632659906005	-0.06163974833442978	0.7910903641811141
ENSG00000112742_P33981-2	ENSG00000112742	P33981-2	6	0.07762356776025613	0.23086633885503408	-0.16897044470729078	0.8746808253307292	0.015210490417178466	0.960275127175433
ENSG00000112759_Q99808	ENSG00000112759	Q99808	6	0.9106718837882886	0.9602374140810267	-0.010820295289903165	0.2935085888203767	-0.10105477576243682	0.6227943093684443
ENSG00000112787_Q9HCM7	ENSG00000112787	Q9HCM7	12	0.7203392823745309	0.8618223520005011	0.034518621714076464	0.3915425780858898	-0.08249792731844946	0.705349200005121
ENSG00000112851_Q96RT1-5	ENSG00000112851	Q96RT1-5	5	0.0003720480590623303	0.005079578564999704	-0.3333978455820394	0.22982952401839185	-0.11542705665150825	0.558743047765396
ENSG00000112855_P49590-2	ENSG00000112855	P49590-2	5	0.19549793412318264	0.4120024659582043	-0.12436521997737868	0.007978964441309874	-0.25173809786459755	0.08707537685013808
ENSG00000112874_Q9BQG2	ENSG00000112874	Q9BQG2	5	0.0006866109404639402	0.008226932878671451	-0.3188393642122606	0.0417677093968792	-0.19447270698915756	0.23361486964082795
ENSG00000112893_Q16706	ENSG00000112893	Q16706	5	0.008156460229245256	0.04997212335809351	-0.25105535272017665	0.00981565023156382	-0.24523815201865326	0.09933500060568377
ENSG00000112972_Q01581	ENSG00000112972	Q01581	5	0.11116369837334378	0.2904785962398689	-0.15273729540205985	0.210825162190337	-0.12024695400231986	0.5384952109215705
ENSG00000112977_P51397	ENSG00000112977	P51397	5	0.4448223273702779	0.6693979755929483	0.07359355743077713	0.9483410628771509	0.006248824688337006	0.9851277835341998
ENSG00000112983_Q9H0E9-2	ENSG00000112983	Q9H0E9-2	5	0.00202600847199964	0.01837103091782414	-0.2911975379956898	0.08336554757305017	-0.16583972898883026	0.3359973634935335
ENSG00000112984_O95235	ENSG00000112984	O95235	5	0.001594251396198925	0.01535585792183823	-0.29755450380983584	0.05438548439674791	-0.18395558458460484	0.26717286276500546
ENSG00000112992_Q13423	ENSG00000112992	Q13423	5	0.059048433852581884	0.19291997341728018	-0.18057791037126855	0.022655696066034844	-0.21719249707559365	0.16384354028252743
ENSG00000112996_Q9NP92	ENSG00000112996	Q9NP92	5	0.760591446624324	0.8839381424261773	-0.029381775101666945	0.9942039956554888	-0.0007006253167657732	0.9979152002993896
ENSG00000113013_P38646	ENSG00000113013	P38646	5	0.5126686275227221	0.7214028776891259	0.0630804441486408	0.2211222202323041	-0.1175989773723215	0.54915628390202
ENSG00000113048_Q92552	ENSG00000113048	Q92552	5	0.00013899742003025922	0.002466522845634992	-0.3553906652951	0.04484812130066753	-0.1916840326948195	0.24203628058304652
ENSG00000113068_E5RGS4	ENSG00000113068	E5RGS4	5	0.13429111881542385	0.3268283663832924	0.14367022197518145	0.6429851393347706	0.044684131095143936	0.8579385133469154
ENSG00000113119_Q96DC7	ENSG00000113119	Q96DC7	5	0.2228494083452344	0.44495776337493953	-0.11716342283967615	0.8319543353978841	-0.02046371864804976	0.9440936574814672
ENSG00000113140_P09486	ENSG00000113140	P09486	5	0.12753323930825886	0.3172903384519752	0.1461865395166172	0.10813038235608363	0.15403229883672812	0.3831212551842211
ENSG00000113141_Q13123	ENSG00000113141	Q13123	5	0.3192504940847917	0.5524315433015994	-0.09584082219486056	0.14865116329196154	-0.1386275196829533	0.455234794296402
ENSG00000113161_P04035	ENSG00000113161	P04035	5	0.911629492757567	0.9603198131852855	-0.010703827003057284	0.8808057057291141	0.014461426485897325	0.9629501784681413
ENSG00000113163_Q9Y5P4-3	ENSG00000113163	Q9Y5P4-3	5	0.3664833099064425	0.5980639894712472	-0.0869352593364691	0.2660783864084134	0.1069556019398243	0.5955618949448974
ENSG00000113194_Q96CS3	ENSG00000113194	Q96CS3	5	0.790900210002766	0.8975909764184026	-0.025568226452049626	0.5499674270939203	0.05760957906939242	0.8091619976949136
ENSG00000113272_Q9NWX6	ENSG00000113272	Q9NWX6	5	0.20188435336635285	0.42056474139291194	0.12262202685434155	0.8230165233653879	-0.021569720859139014	0.9417436569836987
ENSG00000113273_P15848	ENSG00000113273	P15848	5	0.40439866587411694	0.634910916558248	0.08028758762243296	0.4759666086250817	0.06866740381075816	0.7651297603142468
ENSG00000113282_Q14677-3	ENSG00000113282	Q14677-3	5	0.2733491669656031	0.5069581842478385	0.1053531475339782	0.957888138146706	0.005092801690217819	0.9885985843350731
ENSG00000113300_Q9ULM6	ENSG00000113300	Q9ULM6	5	1.637887833770757e-06	7.518854657201265e-05	-0.4386792203580637	0.0397565303480471	-0.19638748700267086	0.22714256519891374
ENSG00000113312_Q99614	ENSG00000113312	Q99614	5	0.3323341348198211	0.5656466265673205	0.09329483106452778	0.9882041825674296	-0.0014259260397551901	0.996589006143331
ENSG00000113318_P20585	ENSG00000113318	P20585	5	0.00010260183129876568	0.001953963549785816	-0.3618602007300621	0.04555623537383086	-0.19106561282058185	0.2440054866724941
ENSG00000113356_D6R9U7	ENSG00000113356	D6R9U7	5	9.7883416051343e-07	4.9958139563772626e-05	-0.4470392581760036	0.015600010840309313	-0.2300867947593848	0.13201277337255146
ENSG00000113360_Q9NRR4	ENSG00000113360	Q9NRR4	5	0.02055503156328176	0.09638499256357509	-0.220619491793417	0.11911845829746773	-0.1494670690416368	0.4028895690884785
ENSG00000113368_P20700	ENSG00000113368	P20700	5	0.034240949001448966	0.1345635309703345	-0.20209004040399672	0.015089410536454581	-0.2312054007395502	0.1285409094368724
ENSG00000113384_Q9H4A6	ENSG00000113384	Q9H4A6	5	0.5092994640697373	0.7187373813503644	-0.0635843911737729	0.612552393255984	0.04881537442410288	0.844054771176131
ENSG00000113387_P53999	ENSG00000113387	P53999	5	0.225017790652437	0.4468613491483349	0.1166199693994099	0.4875229217695514	0.06688439908597127	0.7724156730463558
ENSG00000113396_Q9Y2P4	ENSG00000113396	Q9Y2P4	5	0.1726156713252278	0.38151359124458584	0.13097299389484793	0.5676442110567287	-0.05508053386810429	0.8216526647905034
ENSG00000113407_P26639	ENSG00000113407	P26639	5	0.002348087344033348	0.020392454710668334	0.287211770742948	0.023303394987384117	0.2161908507087689	0.16531732922390105
ENSG00000113456_O60671	ENSG00000113456	O60671	5	0.008939951574312719	0.05332824220646994	-0.2481899716629409	0.30975281341233424	0.09773144994819796	0.6367856258297176
ENSG00000113460_Q8TDN6	ENSG00000113460	Q8TDN6	5	0.6105010191997955	0.7907429884748935	-0.049096973357648	0.9098405336262816	-0.010921420082043862	0.9737165653324734
ENSG00000113504_A0A0G2JNW7	ENSG00000113504	A0A0G2JNW7	5	0.43430297071050267	0.6604199038528646	-0.07530070854517754	0.07876650570729585	-0.1683328215239355	0.3247113847912636
ENSG00000113522_Q92878-2	ENSG00000113522	Q92878-2	5	0.21381259803638394	0.43553144969790747	0.11946941865801605	0.04913799088737935	0.1880545791057904	0.2530112020997922
ENSG00000113552_P46926	ENSG00000113552	P46926	5	0.3760313521763801	0.6067839044595529	0.08522344565667511	0.035484147057283366	0.2007406667896484	0.21086405013817927
ENSG00000113558_P63208	ENSG00000113558	P63208	5	0.2170578373849453	0.4387560305786945	0.11863349294723499	0.031964852478248464	0.2046713653143057	0.19977253168357037
ENSG00000113569_O75694	ENSG00000113569	O75694	5	0.0052941745814943505	0.037306558369039726	-0.2641571290399095	0.7088184050854587	-0.036006205310157566	0.8950701168889116
ENSG00000113575_P67775	ENSG00000113575	P67775	5	0.38956880999879134	0.621641917214696	0.08284108804188234	0.20299526749201272	0.12232286800548055	0.5286621446843964
ENSG00000113593_Q96BP3	ENSG00000113593	Q96BP3	5	0.0012639244841632668	0.012988038111796746	-0.3035802407322917	0.7550110668430505	-0.030088708992706745	0.9098195813010876
ENSG00000113595_P36406-2	ENSG00000113595	P36406-2	5	0.2133306801667307	0.43468956540889003	-0.11959432111291182	0.6776284209689896	0.04007747938664581	0.8755320017602556
ENSG00000113597_A5PLN9-2	ENSG00000113597	A5PLN9-2	5	0.0007653019223226832	0.008863231586680436	-0.3161842329306953	0.455520960374393	0.07188044424414311	0.7536330764871801
ENSG00000113615_O95486	ENSG00000113615	O95486	5	0.022985332949315	0.10475689513230974	0.21667970281225188	0.008716208418363222	0.24898490868956635	0.09161845884210233
ENSG00000113638_Q6PID6	ENSG00000113638	Q6PID6	5	0.5171327112305388	0.7238013006457755	-0.06241533603582261	0.8427602762847481	0.019130068312281298	0.9476625252036217
ENSG00000113643_P54136	ENSG00000113643	P54136	5	0.9741097827821252	0.9875478871072554	-0.003130143303978323	0.8290745849576578	0.02081977432521336	0.9431809254552933
ENSG00000113648_O75367-3	ENSG00000113648	O75367-3	5	0.019294486063796246	0.0924588269395985	-0.222823351337988	0.13010235690940655	-0.14521816971133014	0.4257102187504063
ENSG00000113649_O14776-2	ENSG00000113649	O14776-2	5	0.039844461591135034	0.14821765365815648	-0.19630209606146568	0.4822600620392851	-0.06769355412792087	0.7684922401150877
ENSG00000113658_Q99717	ENSG00000113658	Q99717	5	0.3914570557800828	0.6232421332914865	0.08251277478620582	0.0006976361229468866	0.31845106351152985	0.016562836640943445
ENSG00000113712_P48729	ENSG00000113712	P48729	5	0.13864729845357374	0.3337122476076708	-0.14209897485189454	0.09975769069460373	-0.15776048657128072	0.3658750771771164
ENSG00000113719_Q969X5-2	ENSG00000113719	Q969X5-2	5	0.7686315188017635	0.8882601911685466	-0.02836596411584692	0.0011555522953152788	-0.3058731315556091	0.024430587471253054
ENSG00000113734_Q12981	ENSG00000113734	Q12981	5	0.5514631059829053	0.7479166723189263	-0.057394090269931614	0.3848441494011135	-0.0836667834276306	0.699713653334063
ENSG00000113758_Q16643	ENSG00000113758	Q16643	5	0.7378981765941504	0.8712734063084434	-0.032266770248501414	0.0019370833471330923	-0.292399006709575	0.03505354780151013
ENSG00000113761_Q9UL40	ENSG00000113761	Q9UL40	5	0.5777743513994648	0.7663736424027657	-0.0536480154138132	0.6315801592680148	-0.04622248088303861	0.8539453652426771
ENSG00000113790_Q08426	ENSG00000113790	Q08426	3	0.0017524714175524865	0.0166445373766042	0.2950617147981183	0.02776820798024724	0.2098687302857167	0.18319581907462804
ENSG00000113810_Q9NTJ3	ENSG00000113810	Q9NTJ3	3	0.0043995398593053535	0.03275098120881247	-0.26957913252637666	0.1880105769408139	-0.12646217069030868	0.5096732243386441
ENSG00000113811_F8WAX7	ENSG00000113811	F8WAX7	3	0.2102321253251533	0.43087043478966236	0.12040223562653635	0.8919895872101462	0.013095838319166834	0.967505129642431
ENSG00000113812_Q9H981	ENSG00000113812	Q9H981	3	0.33521238018689925	0.567994652907149	0.09274337750840676	0.4993963963720218	0.06507573665784992	0.776619267108962
ENSG00000113845_Q9NPL8	ENSG00000113845	Q9NPL8	3	0.12143514688929165	0.30792442851013335	-0.14854653833841305	0.0860359384099122	-0.16444218747411793	0.33979421791239056
ENSG00000113851_Q96SW2-2	ENSG00000113851	Q96SW2-2	3	0.2497265222865854	0.4791470648821174	-0.11067162234293876	0.6786251019212816	-0.03994632308460165	0.876233031412557
ENSG00000113966_Q9H0F7	ENSG00000113966	Q9H0F7	3	0.9423886388741592	0.9743809412873835	0.006970021410530455	0.0062063509388309394	0.25941246654319183	0.07459265312223452
ENSG00000114021_Q9NQR4	ENSG00000114021	Q9NQR4	3	0.7096496748909665	0.8569029745447855	0.035898591846251555	0.5407072953016406	0.05895013858724608	0.8029139855591817
ENSG00000114023_F8W7Q4	ENSG00000114023	F8W7Q4	3	0.8087659053828682	0.908588758751635	-0.02333901941712887	0.06723621691324276	-0.17514181263601145	0.29814154257790015
ENSG00000114030_P52294	ENSG00000114030	P52294	3	0.40404729038744097	0.6348312461816564	-0.08034744120841755	0.3417839239888819	0.0914954718980821	0.6614706395990265
ENSG00000114054_E9PDR0	ENSG00000114054	E9PDR0	3	0.03222232939966258	0.1292983878684586	-0.2043717166800084	0.11653240168467195	-0.15051112259740768	0.399646901635676
ENSG00000114062_Q05086-2	ENSG00000114062	Q05086-2	15	0.011768591024614177	0.06500775007077376	-0.23940928973452075	0.8808754364382311	0.014452903557421778	0.9629501784681413
ENSG00000114098_Q8IUR7	ENSG00000114098	Q8IUR7	3	0.0022219263142123358	0.01960432200631636	-0.2887104068786461	0.025907889081413192	-0.2123892053253584	0.17672315306791944
ENSG00000114115_P09455	ENSG00000114115	P09455	3	0.20962915814377467	0.43019135628144234	-0.12056043822544801	0.7814494699109877	-0.02675284824388311	0.9238056383443222
ENSG00000114120_Q96CQ1	ENSG00000114120	Q96CQ1	3	0.3442076893157125	0.5758907619352116	-0.0910390389288936	0.975615786841644	0.002948008830321317	0.993410445516232
ENSG00000114127_Q8IZH2-2	ENSG00000114127	Q8IZH2-2	3	0.31040361851050186	0.5426075340595882	-0.09760070787941044	0.018617443081735543	0.22405875694936747	0.14758071902099942
ENSG00000114209_Q9BUL8	ENSG00000114209	Q9BUL8	3	0.7416288075371084	0.8733594562674175	0.03179060196849955	0.6333018370435802	0.04598951765511677	0.8542781274444675
ENSG00000114302_P13861-2	ENSG00000114302	P13861-2	3	0.5776323571741214	0.7663457555388606	-0.053668013642128184	0.5944271286259449	0.051318120590283615	0.8339685032802898
[truncated: 4,407 more rows]
