# Supplementary material for: Population-scale proteome variation in human induced pluripotent stem cells
Source: eLife. 2020 Aug 10;9:e57390. doi: 10.7554/eLife.57390 (PMC7447446; doi:10.7554/eLife.57390)
Supplement: Figure 1—source data 6. — This table enumerates the significant Genome Ontology terms and DNA regulatory motifs (FDR 0.05; fields 'source' and 'term_name') for different gene sets (field ‘molecular_layer’ and ’change_direction’): 1) RNA positively correlated with XCI inactivation, 2) RNA negatively correlated with XIC, 3) proteins positively correlated with XIC and without RNA nominal significance, and 4) proteins negatively correlated with XIC and without RNA nominal significance. [file elife-57390-fig1-data6.xls]

	molecular_layer	change_direction	source	term_name	term_id	adjusted_p_value	term_size	query_size	intersection_size	effective_domain_size	intersections
0	rna	negative	GO:BP	nuclear chromosome segregation	GO:0098813	0.0011926083032635572	162	790	46	5979	ENSG00000002822,ENSG00000010292,ENSG00000013810,ENSG00000047410,ENSG00000058804,ENSG00000071539,ENSG00000076242,ENSG00000076382,ENSG00000080986,ENSG00000083535,ENSG00000083642,ENSG00000085415,ENSG00000090889,ENSG00000102974,ENSG00000109805,ENSG00000112029,ENSG00000113648,ENSG00000113810,ENSG00000114346,ENSG00000114999,ENSG00000117724,ENSG00000118193,ENSG00000121152,ENSG00000121621,ENSG00000126787…
1	rna	negative	GO:BP	cell cycle process	GO:0022402	0.0013497173756746238	780	790	149	5979	ENSG00000002822,ENSG00000010292,ENSG00000011295,ENSG00000013810,ENSG00000044459,ENSG00000047188,ENSG00000047410,ENSG00000054523,ENSG00000058091,ENSG00000058453,ENSG00000058804,ENSG00000060982,ENSG00000065243,ENSG00000066279,ENSG00000068489,ENSG00000071539,ENSG00000072121,ENSG00000074266,ENSG00000075218,ENSG00000076242,ENSG00000076382,ENSG00000077254,ENSG00000080986,ENSG00000083535,ENSG00000083642…
2	rna	negative	GO:BP	chromosome segregation	GO:0007059	0.001791806526376834	207	790	53	5979	ENSG00000002822,ENSG00000010292,ENSG00000013810,ENSG00000047410,ENSG00000058804,ENSG00000071539,ENSG00000076242,ENSG00000076382,ENSG00000080986,ENSG00000083535,ENSG00000083642,ENSG00000085415,ENSG00000090889,ENSG00000096063,ENSG00000100038,ENSG00000101266,ENSG00000102974,ENSG00000109805,ENSG00000112029,ENSG00000113648,ENSG00000113810,ENSG00000114346,ENSG00000114999,ENSG00000117724,ENSG00000118193…
3	rna	negative	GO:BP	organelle fission	GO:0048285	0.001997965719614297	248	790	60	5979	ENSG00000002822,ENSG00000010292,ENSG00000013810,ENSG00000047410,ENSG00000054523,ENSG00000058804,ENSG00000066279,ENSG00000071539,ENSG00000076242,ENSG00000076382,ENSG00000080986,ENSG00000083535,ENSG00000083642,ENSG00000085415,ENSG00000087470,ENSG00000090889,ENSG00000100335,ENSG00000104381,ENSG00000109805,ENSG00000112029,ENSG00000113318,ENSG00000113456,ENSG00000113648,ENSG00000113810,ENSG00000117724…
4	rna	negative	GO:BP	nuclear division	GO:0000280	0.0027721478302463578	224	790	55	5979	ENSG00000002822,ENSG00000010292,ENSG00000013810,ENSG00000047410,ENSG00000054523,ENSG00000058804,ENSG00000066279,ENSG00000071539,ENSG00000076242,ENSG00000076382,ENSG00000080986,ENSG00000083535,ENSG00000083642,ENSG00000085415,ENSG00000090889,ENSG00000109805,ENSG00000112029,ENSG00000113318,ENSG00000113456,ENSG00000113648,ENSG00000113810,ENSG00000117724,ENSG00000118193,ENSG00000121152,ENSG00000121211…
5	rna	negative	GO:BP	meiotic nuclear division	GO:0140013	0.0071717164833971355	62	790	22	5979	ENSG00000058804,ENSG00000066279,ENSG00000071539,ENSG00000076242,ENSG00000112029,ENSG00000113318,ENSG00000113456,ENSG00000113810,ENSG00000121152,ENSG00000121211,ENSG00000121621,ENSG00000131747,ENSG00000144554,ENSG00000145241,ENSG00000149311,ENSG00000156970,ENSG00000163535,ENSG00000164961,ENSG00000166783,ENSG00000175595,ENSG00000197275,ENSG00000204371
6	rna	negative	GO:BP	cell division	GO:0051301	0.011517687540231504	372	790	78	5979	ENSG00000002822,ENSG00000010292,ENSG00000011295,ENSG00000013810,ENSG00000047410,ENSG00000051382,ENSG00000058091,ENSG00000065243,ENSG00000066279,ENSG00000072121,ENSG00000076382,ENSG00000079819,ENSG00000080986,ENSG00000082258,ENSG00000083642,ENSG00000085415,ENSG00000090889,ENSG00000092036,ENSG00000100154,ENSG00000100167,ENSG00000109805,ENSG00000112029,ENSG00000112984,ENSG00000113810,ENSG00000114346…
7	rna	negative	GO:BP	sister chromatid segregation	GO:0000819	0.012424279613132564	139	790	37	5979	ENSG00000002822,ENSG00000010292,ENSG00000013810,ENSG00000047410,ENSG00000071539,ENSG00000076382,ENSG00000080986,ENSG00000083535,ENSG00000083642,ENSG00000085415,ENSG00000090889,ENSG00000102974,ENSG00000109805,ENSG00000112029,ENSG00000113648,ENSG00000113810,ENSG00000117724,ENSG00000118193,ENSG00000121152,ENSG00000121621,ENSG00000126787,ENSG00000131747,ENSG00000132341,ENSG00000134222,ENSG00000136861…
8	rna	negative	GO:BP	cell cycle	GO:0007049	0.012429550530775562	999	790	174	5979	ENSG00000002822,ENSG00000010292,ENSG00000011295,ENSG00000013810,ENSG00000015171,ENSG00000044459,ENSG00000047188,ENSG00000047410,ENSG00000054523,ENSG00000058091,ENSG00000058453,ENSG00000058804,ENSG00000060982,ENSG00000065243,ENSG00000066279,ENSG00000068489,ENSG00000071539,ENSG00000072121,ENSG00000074266,ENSG00000075218,ENSG00000076242,ENSG00000076382,ENSG00000077254,ENSG00000079819,ENSG00000080986…
9	rna	negative	GO:BP	microtubule-based process	GO:0007017	0.012429550530775562	394	790	81	5979	ENSG00000013810,ENSG00000015133,ENSG00000044459,ENSG00000047410,ENSG00000054523,ENSG00000054654,ENSG00000058453,ENSG00000066279,ENSG00000075218,ENSG00000076242,ENSG00000076382,ENSG00000077254,ENSG00000078018,ENSG00000080298,ENSG00000080986,ENSG00000083312,ENSG00000083535,ENSG00000090889,ENSG00000092036,ENSG00000097007,ENSG00000101004,ENSG00000101624,ENSG00000104133,ENSG00000105948,ENSG00000109171…
10	rna	negative	GO:BP	mitotic sister chromatid segregation	GO:0000070	0.0182814971522814	122	790	33	5979	ENSG00000002822,ENSG00000010292,ENSG00000013810,ENSG00000047410,ENSG00000071539,ENSG00000076382,ENSG00000080986,ENSG00000083535,ENSG00000083642,ENSG00000085415,ENSG00000090889,ENSG00000109805,ENSG00000112029,ENSG00000113648,ENSG00000113810,ENSG00000117724,ENSG00000118193,ENSG00000121152,ENSG00000121621,ENSG00000126787,ENSG00000132341,ENSG00000134222,ENSG00000136861,ENSG00000137807,ENSG00000142945…
11	rna	negative	GO:BP	microtubule cytoskeleton organization	GO:0000226	0.01899238503066526	298	790	64	5979	ENSG00000013810,ENSG00000015133,ENSG00000044459,ENSG00000047410,ENSG00000054654,ENSG00000058453,ENSG00000066279,ENSG00000076242,ENSG00000076382,ENSG00000077254,ENSG00000078018,ENSG00000080986,ENSG00000083535,ENSG00000090889,ENSG00000092036,ENSG00000097007,ENSG00000101004,ENSG00000101624,ENSG00000105948,ENSG00000109171,ENSG00000112029,ENSG00000112984,ENSG00000114999,ENSG00000115355,ENSG00000116641…
12	rna	negative	GO:BP	meiotic cell cycle process	GO:1903046	0.01899238503066526	73	790	23	5979	ENSG00000010292,ENSG00000058804,ENSG00000066279,ENSG00000071539,ENSG00000076242,ENSG00000112029,ENSG00000113318,ENSG00000113456,ENSG00000113810,ENSG00000121152,ENSG00000121211,ENSG00000121621,ENSG00000131747,ENSG00000144554,ENSG00000145241,ENSG00000149311,ENSG00000156970,ENSG00000163535,ENSG00000164961,ENSG00000166783,ENSG00000175595,ENSG00000197275,ENSG00000204371
13	rna	negative	GO:BP	cytoskeleton organization	GO:0007010	0.02094146229009961	672	790	123	5979	ENSG00000013810,ENSG00000015133,ENSG00000018189,ENSG00000044459,ENSG00000047410,ENSG00000054654,ENSG00000058453,ENSG00000066279,ENSG00000070087,ENSG00000071051,ENSG00000075340,ENSG00000076242,ENSG00000076382,ENSG00000077254,ENSG00000078018,ENSG00000079819,ENSG00000080986,ENSG00000083535,ENSG00000088756,ENSG00000090889,ENSG00000092036,ENSG00000092964,ENSG00000097007,ENSG00000099204,ENSG00000100625…
14	rna	negative	GO:BP	chromosome organization involved in meiotic cell cycle	GO:0070192	0.026638131033070136	23	790	11	5979	ENSG00000010292,ENSG00000058804,ENSG00000071539,ENSG00000076242,ENSG00000113810,ENSG00000121152,ENSG00000144554,ENSG00000149311,ENSG00000156970,ENSG00000163535,ENSG00000204371
15	rna	negative	GO:BP	meiotic chromosome segregation	GO:0045132	0.029555122816187506	31	790	13	5979	ENSG00000058804,ENSG00000071539,ENSG00000076242,ENSG00000113810,ENSG00000121152,ENSG00000131747,ENSG00000144554,ENSG00000145241,ENSG00000149311,ENSG00000156970,ENSG00000163535,ENSG00000175595,ENSG00000204371
16	rna	negative	GO:BP	nervous system development	GO:0007399	0.032124139232857465	861	790	150	5979	ENSG00000004487,ENSG00000007062,ENSG00000013810,ENSG00000018189,ENSG00000043355,ENSG00000046889,ENSG00000051382,ENSG00000054654,ENSG00000054983,ENSG00000055163,ENSG00000066279,ENSG00000069248,ENSG00000071051,ENSG00000072415,ENSG00000073578,ENSG00000074266,ENSG00000075340,ENSG00000075539,ENSG00000077063,ENSG00000077254,ENSG00000078018,ENSG00000079246,ENSG00000083307,ENSG00000083720,ENSG00000087470…
17	rna	negative	REAC	Mitotic Prometaphase	REAC:R-HSA-68877	0.02487094565889146	149	514	36	4147	ENSG00000002822,ENSG00000010292,ENSG00000030066,ENSG00000069248,ENSG00000080986,ENSG00000083642,ENSG00000092036,ENSG00000100162,ENSG00000101004,ENSG00000101266,ENSG00000101624,ENSG00000109805,ENSG00000111581,ENSG00000112640,ENSG00000113810,ENSG00000117724,ENSG00000119397,ENSG00000121152,ENSG00000121621,ENSG00000123416,ENSG00000135720,ENSG00000136861,ENSG00000137812,ENSG00000139350,ENSG00000142945…
18	rna	negative	REAC	Signaling by Rho GTPases	REAC:R-HSA-194315	0.02487094565889146	239	514	51	4147	ENSG00000002822,ENSG00000004487,ENSG00000030066,ENSG00000055163,ENSG00000057608,ENSG00000065243,ENSG00000069248,ENSG00000070087,ENSG00000080986,ENSG00000088756,ENSG00000089639,ENSG00000097007,ENSG00000100162,ENSG00000111581,ENSG00000112640,ENSG00000114346,ENSG00000117724,ENSG00000118193,ENSG00000120318,ENSG00000121621,ENSG00000122966,ENSG00000123416,ENSG00000124126,ENSG00000134215,ENSG00000134308…
19	rna	negative	REAC	Factors involved in megakaryocyte development and platelet production	REAC:R-HSA-983231	0.04577573576500655	79	514	22	4147	ENSG00000004487,ENSG00000054523,ENSG00000090889,ENSG00000094916,ENSG00000097007,ENSG00000100605,ENSG00000112984,ENSG00000116641,ENSG00000121621,ENSG00000123416,ENSG00000128512,ENSG00000137807,ENSG00000138160,ENSG00000141510,ENSG00000142875,ENSG00000142945,ENSG00000150760,ENSG00000161800,ENSG00000163808,ENSG00000170759,ENSG00000176014,ENSG00000197892
20	rna	negative	REAC	Kinesins	REAC:R-HSA-983189	0.04577573576500655	35	514	13	4147	ENSG00000054523,ENSG00000090889,ENSG00000112984,ENSG00000121621,ENSG00000123416,ENSG00000137807,ENSG00000138160,ENSG00000142945,ENSG00000161800,ENSG00000163808,ENSG00000170759,ENSG00000176014,ENSG00000197892
21	rna	negative	TF	Factor: FOXO1A; motif: AAACAA; match class: 0	TF:M03823_0	1.4554013503097215e-06	4528	835	672	6295	ENSG00000001629,ENSG00000002822,ENSG00000003756,ENSG00000004487,ENSG00000004766,ENSG00000005436,ENSG00000006125,ENSG00000006715,ENSG00000007062,ENSG00000007202,ENSG00000008838,ENSG00000009307,ENSG00000011295,ENSG00000015171,ENSG00000016864,ENSG00000018189,ENSG00000023228,ENSG00000023892,ENSG00000027001,ENSG00000028116,ENSG00000030066,ENSG00000035681,ENSG00000036549,ENSG00000039123,ENSG00000039319…
22	rna	negative	TF	Factor: FOXO1A; motif: AAACAA	TF:M03823	1.4554013503097215e-06	4528	835	672	6295	ENSG00000001629,ENSG00000002822,ENSG00000003756,ENSG00000004487,ENSG00000004766,ENSG00000005436,ENSG00000006125,ENSG00000006715,ENSG00000007062,ENSG00000007202,ENSG00000008838,ENSG00000009307,ENSG00000011295,ENSG00000015171,ENSG00000016864,ENSG00000018189,ENSG00000023228,ENSG00000023892,ENSG00000027001,ENSG00000028116,ENSG00000030066,ENSG00000035681,ENSG00000036549,ENSG00000039123,ENSG00000039319…
23	rna	negative	TF	Factor: SRY; motif: TTGTTT	TF:M03854	1.4554013503097215e-06	4528	835	672	6295	ENSG00000001629,ENSG00000002822,ENSG00000003756,ENSG00000004487,ENSG00000004766,ENSG00000005436,ENSG00000006125,ENSG00000006715,ENSG00000007062,ENSG00000007202,ENSG00000008838,ENSG00000009307,ENSG00000011295,ENSG00000015171,ENSG00000016864,ENSG00000018189,ENSG00000023228,ENSG00000023892,ENSG00000027001,ENSG00000028116,ENSG00000030066,ENSG00000035681,ENSG00000036549,ENSG00000039123,ENSG00000039319…
24	rna	negative	TF	Factor: SRY; motif: TTGTTT; match class: 0	TF:M03854_0	1.4554013503097215e-06	4528	835	672	6295	ENSG00000001629,ENSG00000002822,ENSG00000003756,ENSG00000004487,ENSG00000004766,ENSG00000005436,ENSG00000006125,ENSG00000006715,ENSG00000007062,ENSG00000007202,ENSG00000008838,ENSG00000009307,ENSG00000011295,ENSG00000015171,ENSG00000016864,ENSG00000018189,ENSG00000023228,ENSG00000023892,ENSG00000027001,ENSG00000028116,ENSG00000030066,ENSG00000035681,ENSG00000036549,ENSG00000039123,ENSG00000039319…
25	rna	negative	TF	Factor: HNF-3alpha; motif: WRWGTAAAC	TF:M04737	6.933487796204093e-05	1473	835	258	6295	ENSG00000003756,ENSG00000006125,ENSG00000007062,ENSG00000010292,ENSG00000027001,ENSG00000039319,ENSG00000039650,ENSG00000042088,ENSG00000043093,ENSG00000044459,ENSG00000046889,ENSG00000048544,ENSG00000048991,ENSG00000051382,ENSG00000054523,ENSG00000056097,ENSG00000058673,ENSG00000065243,ENSG00000069248,ENSG00000072042,ENSG00000072415,ENSG00000076382,ENSG00000077254,ENSG00000078043,ENSG00000079246…
26	rna	negative	TF	Factor: HNF-3alpha; motif: WRWGTAAAC; match class: 0	TF:M04737_0	6.933487796204093e-05	1473	835	258	6295	ENSG00000003756,ENSG00000006125,ENSG00000007062,ENSG00000010292,ENSG00000027001,ENSG00000039319,ENSG00000039650,ENSG00000042088,ENSG00000043093,ENSG00000044459,ENSG00000046889,ENSG00000048544,ENSG00000048991,ENSG00000051382,ENSG00000054523,ENSG00000056097,ENSG00000058673,ENSG00000065243,ENSG00000069248,ENSG00000072042,ENSG00000072415,ENSG00000076382,ENSG00000077254,ENSG00000078043,ENSG00000079246…
27	rna	negative	TF	Factor: LHX3; motif: ATTAAW; match class: 0	TF:M02097_0	0.00030731769256907006	3758	835	564	6295	ENSG00000004487,ENSG00000004766,ENSG00000006125,ENSG00000006715,ENSG00000007062,ENSG00000007202,ENSG00000008838,ENSG00000009307,ENSG00000009335,ENSG00000011295,ENSG00000011566,ENSG00000015171,ENSG00000016864,ENSG00000018189,ENSG00000018510,ENSG00000023228,ENSG00000028116,ENSG00000030066,ENSG00000036549,ENSG00000039123,ENSG00000039319,ENSG00000039650,ENSG00000040341,ENSG00000042088,ENSG00000043355…
28	rna	negative	TF	Factor: LHX3; motif: ATTAAW	TF:M02097	0.00030731769256907006	3758	835	564	6295	ENSG00000004487,ENSG00000004766,ENSG00000006125,ENSG00000006715,ENSG00000007062,ENSG00000007202,ENSG00000008838,ENSG00000009307,ENSG00000009335,ENSG00000011295,ENSG00000011566,ENSG00000015171,ENSG00000016864,ENSG00000018189,ENSG00000018510,ENSG00000023228,ENSG00000028116,ENSG00000030066,ENSG00000036549,ENSG00000039123,ENSG00000039319,ENSG00000039650,ENSG00000040341,ENSG00000042088,ENSG00000043355…
29	rna	negative	TF	Factor: E2F-1:DP-2; motif: TTTSSCGC; match class: 1	TF:M00737_1	0.0004404386781251626	1316	835	230	6295	ENSG00000003756,ENSG00000004766,ENSG00000005436,ENSG00000007062,ENSG00000009335,ENSG00000011566,ENSG00000016864,ENSG00000023892,ENSG00000030066,ENSG00000039319,ENSG00000044459,ENSG00000048544,ENSG00000051382,ENSG00000053371,ENSG00000054654,ENSG00000058056,ENSG00000058091,ENSG00000061936,ENSG00000064933,ENSG00000065243,ENSG00000074266,ENSG00000075340,ENSG00000075539,ENSG00000075643,ENSG00000076242…
30	rna	negative	TF	Factor: Sox-10; motif: NACAAWG; match class: 1	TF:M02116_1	0.0006552346874031527	2284	835	366	6295	ENSG00000004487,ENSG00000004766,ENSG00000005436,ENSG00000007062,ENSG00000009307,ENSG00000009335,ENSG00000011258,ENSG00000015133,ENSG00000015171,ENSG00000018189,ENSG00000023892,ENSG00000028116,ENSG00000030066,ENSG00000035681,ENSG00000040341,ENSG00000044459,ENSG00000046889,ENSG00000048544,ENSG00000048991,ENSG00000051382,ENSG00000054523,ENSG00000054654,ENSG00000054983,ENSG00000059588,ENSG00000060982…
31	rna	negative	TF	Factor: DRI1; motif: AATTAA; match class: 1	TF:M01654_1	0.0012086932821149653	1670	835	278	6295	ENSG00000003756,ENSG00000004487,ENSG00000006715,ENSG00000008838,ENSG00000018189,ENSG00000018510,ENSG00000023228,ENSG00000027001,ENSG00000040341,ENSG00000047188,ENSG00000047410,ENSG00000048544,ENSG00000048991,ENSG00000055163,ENSG00000057019,ENSG00000060982,ENSG00000061794,ENSG00000061936,ENSG00000066279,ENSG00000068489,ENSG00000069248,ENSG00000070501,ENSG00000071051,ENSG00000072042,ENSG00000072121…
32	rna	negative	TF	Factor: Dlx-5; motif: AATTAN; match class: 1	TF:M03546_1	0.0012086932821149653	1670	835	278	6295	ENSG00000003756,ENSG00000004487,ENSG00000006715,ENSG00000008838,ENSG00000018189,ENSG00000018510,ENSG00000023228,ENSG00000027001,ENSG00000040341,ENSG00000047188,ENSG00000047410,ENSG00000048544,ENSG00000048991,ENSG00000055163,ENSG00000057019,ENSG00000060982,ENSG00000061794,ENSG00000061936,ENSG00000066279,ENSG00000068489,ENSG00000069248,ENSG00000070501,ENSG00000071051,ENSG00000072042,ENSG00000072121…
33	rna	negative	TF	Factor: PARP; motif: TTTCYN	TF:M02027	0.002184696875901192	5190	835	733	6295	ENSG00000001629,ENSG00000002822,ENSG00000004487,ENSG00000004766,ENSG00000005436,ENSG00000006125,ENSG00000006715,ENSG00000007062,ENSG00000007202,ENSG00000008838,ENSG00000009307,ENSG00000010292,ENSG00000011258,ENSG00000011566,ENSG00000015133,ENSG00000015171,ENSG00000018189,ENSG00000018510,ENSG00000023228,ENSG00000023892,ENSG00000027001,ENSG00000028116,ENSG00000030066,ENSG00000035681,ENSG00000039123…
34	rna	negative	TF	Factor: PARP; motif: TTTCYN; match class: 0	TF:M02027_0	0.002184696875901192	5190	835	733	6295	ENSG00000001629,ENSG00000002822,ENSG00000004487,ENSG00000004766,ENSG00000005436,ENSG00000006125,ENSG00000006715,ENSG00000007062,ENSG00000007202,ENSG00000008838,ENSG00000009307,ENSG00000010292,ENSG00000011258,ENSG00000011566,ENSG00000015133,ENSG00000015171,ENSG00000018189,ENSG00000018510,ENSG00000023228,ENSG00000023892,ENSG00000027001,ENSG00000028116,ENSG00000030066,ENSG00000035681,ENSG00000039123…
35	rna	negative	TF	Factor: FOXO1; motif: NRWAAACAAN; match class: 0	TF:M00473_0	0.002926897517488285	740	835	138	6295	ENSG00000005436,ENSG00000018189,ENSG00000023228,ENSG00000027001,ENSG00000028116,ENSG00000039123,ENSG00000039319,ENSG00000043093,ENSG00000044459,ENSG00000048392,ENSG00000048991,ENSG00000061794,ENSG00000066279,ENSG00000070501,ENSG00000071794,ENSG00000073578,ENSG00000074603,ENSG00000078018,ENSG00000079819,ENSG00000080298,ENSG00000083642,ENSG00000085377,ENSG00000086200,ENSG00000087470,ENSG00000090889…
36	rna	negative	TF	Factor: FOXO1; motif: NRWAAACAAN	TF:M00473	0.002926897517488285	740	835	138	6295	ENSG00000005436,ENSG00000018189,ENSG00000023228,ENSG00000027001,ENSG00000028116,ENSG00000039123,ENSG00000039319,ENSG00000043093,ENSG00000044459,ENSG00000048392,ENSG00000048991,ENSG00000061794,ENSG00000066279,ENSG00000070501,ENSG00000071794,ENSG00000073578,ENSG00000074603,ENSG00000078018,ENSG00000079819,ENSG00000080298,ENSG00000083642,ENSG00000085377,ENSG00000086200,ENSG00000087470,ENSG00000090889…
37	rna	negative	TF	Factor: PARP; motif: TTTCYN; match class: 1	TF:M02027_1	0.002926897517488285	3664	835	544	6295	ENSG00000004487,ENSG00000004766,ENSG00000005436,ENSG00000006125,ENSG00000006715,ENSG00000007062,ENSG00000007202,ENSG00000008838,ENSG00000009307,ENSG00000010292,ENSG00000011258,ENSG00000011566,ENSG00000015133,ENSG00000015171,ENSG00000018189,ENSG00000018510,ENSG00000023228,ENSG00000023892,ENSG00000027001,ENSG00000028116,ENSG00000030066,ENSG00000039123,ENSG00000039319,ENSG00000040341,ENSG00000044459…
38	rna	negative	TF	Factor: Sox-10; motif: NACAAWG	TF:M02116	0.0029492425650422503	4443	835	642	6295	ENSG00000001629,ENSG00000002822,ENSG00000004487,ENSG00000004766,ENSG00000005436,ENSG00000006715,ENSG00000007062,ENSG00000008838,ENSG00000009307,ENSG00000009335,ENSG00000010292,ENSG00000011258,ENSG00000011295,ENSG00000011566,ENSG00000013810,ENSG00000015133,ENSG00000015171,ENSG00000016864,ENSG00000018189,ENSG00000023892,ENSG00000028116,ENSG00000030066,ENSG00000035681,ENSG00000039319,ENSG00000039650…
39	rna	negative	TF	Factor: Sox-10; motif: NACAAWG; match class: 0	TF:M02116_0	0.0029492425650422503	4443	835	642	6295	ENSG00000001629,ENSG00000002822,ENSG00000004487,ENSG00000004766,ENSG00000005436,ENSG00000006715,ENSG00000007062,ENSG00000008838,ENSG00000009307,ENSG00000009335,ENSG00000010292,ENSG00000011258,ENSG00000011295,ENSG00000011566,ENSG00000013810,ENSG00000015133,ENSG00000015171,ENSG00000016864,ENSG00000018189,ENSG00000023892,ENSG00000028116,ENSG00000030066,ENSG00000035681,ENSG00000039319,ENSG00000039650…
40	rna	negative	TF	Factor: FOXO3A; motif: TRTAAACAANWN	TF:M01137	0.0030501066170887515	1136	835	197	6295	ENSG00000005436,ENSG00000008838,ENSG00000009307,ENSG00000018189,ENSG00000018510,ENSG00000023228,ENSG00000027001,ENSG00000028116,ENSG00000039123,ENSG00000039319,ENSG00000043093,ENSG00000044459,ENSG00000048392,ENSG00000048991,ENSG00000060982,ENSG00000061794,ENSG00000066279,ENSG00000070501,ENSG00000071794,ENSG00000073578,ENSG00000074603,ENSG00000075643,ENSG00000078018,ENSG00000078053,ENSG00000079819…
41	rna	negative	TF	Factor: FOXO3A; motif: TRTAAACAANWN; match class: 0	TF:M01137_0	0.0030501066170887515	1136	835	197	6295	ENSG00000005436,ENSG00000008838,ENSG00000009307,ENSG00000018189,ENSG00000018510,ENSG00000023228,ENSG00000027001,ENSG00000028116,ENSG00000039123,ENSG00000039319,ENSG00000043093,ENSG00000044459,ENSG00000048392,ENSG00000048991,ENSG00000060982,ENSG00000061794,ENSG00000066279,ENSG00000070501,ENSG00000071794,ENSG00000073578,ENSG00000074603,ENSG00000075643,ENSG00000078018,ENSG00000078053,ENSG00000079819…
42	rna	negative	TF	Factor: HOXA13; motif: ATAAMA; match class: 0	TF:M01292_0	0.004645827509686436	4232	835	614	6295	ENSG00000002822,ENSG00000003756,ENSG00000004487,ENSG00000004766,ENSG00000005436,ENSG00000006125,ENSG00000006715,ENSG00000007202,ENSG00000008838,ENSG00000009307,ENSG00000009335,ENSG00000010292,ENSG00000015133,ENSG00000015171,ENSG00000018189,ENSG00000018510,ENSG00000023228,ENSG00000023892,ENSG00000028116,ENSG00000030066,ENSG00000035681,ENSG00000036549,ENSG00000039123,ENSG00000039319,ENSG00000039650…
43	rna	negative	TF	Factor: HOXA13; motif: ATAAMA	TF:M01292	0.004645827509686436	4232	835	614	6295	ENSG00000002822,ENSG00000003756,ENSG00000004487,ENSG00000004766,ENSG00000005436,ENSG00000006125,ENSG00000006715,ENSG00000007202,ENSG00000008838,ENSG00000009307,ENSG00000009335,ENSG00000010292,ENSG00000015133,ENSG00000015171,ENSG00000018189,ENSG00000018510,ENSG00000023228,ENSG00000023892,ENSG00000028116,ENSG00000030066,ENSG00000035681,ENSG00000036549,ENSG00000039123,ENSG00000039319,ENSG00000039650…
44	rna	negative	TF	Factor: LHX3; motif: ATTAAW; match class: 1	TF:M02097_1	0.004798363901898366	1880	835	302	6295	ENSG00000004487,ENSG00000004766,ENSG00000006125,ENSG00000006715,ENSG00000008838,ENSG00000011295,ENSG00000016864,ENSG00000018189,ENSG00000018510,ENSG00000023228,ENSG00000028116,ENSG00000039123,ENSG00000039319,ENSG00000040341,ENSG00000042088,ENSG00000046889,ENSG00000047188,ENSG00000047410,ENSG00000048544,ENSG00000048991,ENSG00000054983,ENSG00000057019,ENSG00000060982,ENSG00000061794,ENSG00000061936…
45	rna	negative	TF	Factor: ipf1; motif: CATTAR	TF:M01275	0.005741165188272893	2645	835	406	6295	ENSG00000003756,ENSG00000004487,ENSG00000006125,ENSG00000007062,ENSG00000009335,ENSG00000011295,ENSG00000018189,ENSG00000018510,ENSG00000023228,ENSG00000027001,ENSG00000028116,ENSG00000030066,ENSG00000039319,ENSG00000039650,ENSG00000040341,ENSG00000044459,ENSG00000046889,ENSG00000047188,ENSG00000048544,ENSG00000054523,ENSG00000054654,ENSG00000054983,ENSG00000056097,ENSG00000057019,ENSG00000057608…
46	rna	negative	TF	Factor: ipf1; motif: CATTAR; match class: 0	TF:M01275_0	0.005741165188272893	2645	835	406	6295	ENSG00000003756,ENSG00000004487,ENSG00000006125,ENSG00000007062,ENSG00000009335,ENSG00000011295,ENSG00000018189,ENSG00000018510,ENSG00000023228,ENSG00000027001,ENSG00000028116,ENSG00000030066,ENSG00000039319,ENSG00000039650,ENSG00000040341,ENSG00000044459,ENSG00000046889,ENSG00000047188,ENSG00000048544,ENSG00000054523,ENSG00000054654,ENSG00000054983,ENSG00000056097,ENSG00000057019,ENSG00000057608…
47	rna	negative	TF	Factor: Sox-10; motif: CWTTGT; match class: 1	TF:M03138_1	0.005741165188272893	1937	835	309	6295	ENSG00000002822,ENSG00000004487,ENSG00000004766,ENSG00000005436,ENSG00000006715,ENSG00000007062,ENSG00000009307,ENSG00000009335,ENSG00000011258,ENSG00000011566,ENSG00000015133,ENSG00000018189,ENSG00000023892,ENSG00000028116,ENSG00000030066,ENSG00000040341,ENSG00000042088,ENSG00000044459,ENSG00000046889,ENSG00000048991,ENSG00000051382,ENSG00000054523,ENSG00000054654,ENSG00000058091,ENSG00000059588…
48	rna	negative	TF	Factor: TCF-1; motif: CTTTGW; match class: 1	TF:M03857_1	0.005741165188272893	1937	835	309	6295	ENSG00000002822,ENSG00000004487,ENSG00000004766,ENSG00000005436,ENSG00000006715,ENSG00000007062,ENSG00000009307,ENSG00000009335,ENSG00000011258,ENSG00000011566,ENSG00000015133,ENSG00000018189,ENSG00000023892,ENSG00000028116,ENSG00000030066,ENSG00000040341,ENSG00000042088,ENSG00000044459,ENSG00000046889,ENSG00000048991,ENSG00000051382,ENSG00000054523,ENSG00000054654,ENSG00000058091,ENSG00000059588…
49	rna	negative	TF	Factor: FOXP3; motif: RTAAACAA; match class: 0	TF:M01599_0	0.006521863860994564	464	835	92	6295	ENSG00000005436,ENSG00000018189,ENSG00000023228,ENSG00000028116,ENSG00000039123,ENSG00000044459,ENSG00000048392,ENSG00000048991,ENSG00000061794,ENSG00000071794,ENSG00000073578,ENSG00000074603,ENSG00000079819,ENSG00000083642,ENSG00000085377,ENSG00000086200,ENSG00000087470,ENSG00000090889,ENSG00000092140,ENSG00000096063,ENSG00000100296,ENSG00000100625,ENSG00000103978,ENSG00000104381,ENSG00000105778…
50	rna	negative	TF	Factor: FOXP3; motif: RTAAACAA	TF:M01599	0.006521863860994564	464	835	92	6295	ENSG00000005436,ENSG00000018189,ENSG00000023228,ENSG00000028116,ENSG00000039123,ENSG00000044459,ENSG00000048392,ENSG00000048991,ENSG00000061794,ENSG00000071794,ENSG00000073578,ENSG00000074603,ENSG00000079819,ENSG00000083642,ENSG00000085377,ENSG00000086200,ENSG00000087470,ENSG00000090889,ENSG00000092140,ENSG00000096063,ENSG00000100296,ENSG00000100625,ENSG00000103978,ENSG00000104381,ENSG00000105778…
51	rna	negative	TF	Factor: SRY; motif: TTGTTT; match class: 1	TF:M03854_1	0.007300780451816823	2810	835	427	6295	ENSG00000004487,ENSG00000005436,ENSG00000006125,ENSG00000006715,ENSG00000007062,ENSG00000007202,ENSG00000008838,ENSG00000009307,ENSG00000011295,ENSG00000018189,ENSG00000023228,ENSG00000027001,ENSG00000028116,ENSG00000030066,ENSG00000035681,ENSG00000039123,ENSG00000040341,ENSG00000043093,ENSG00000044459,ENSG00000046889,ENSG00000048392,ENSG00000048544,ENSG00000048991,ENSG00000051382,ENSG00000054983…
52	rna	negative	TF	Factor: FOXO1A; motif: AAACAA; match class: 1	TF:M03823_1	0.007300780451816823	2810	835	427	6295	ENSG00000004487,ENSG00000005436,ENSG00000006125,ENSG00000006715,ENSG00000007062,ENSG00000007202,ENSG00000008838,ENSG00000009307,ENSG00000011295,ENSG00000018189,ENSG00000023228,ENSG00000027001,ENSG00000028116,ENSG00000030066,ENSG00000035681,ENSG00000039123,ENSG00000040341,ENSG00000043093,ENSG00000044459,ENSG00000046889,ENSG00000048392,ENSG00000048544,ENSG00000048991,ENSG00000051382,ENSG00000054983…
53	rna	negative	TF	Factor: Cdx-1; motif: TTTATK; match class: 0	TF:M02086_0	0.007847179264090736	4590	835	656	6295	ENSG00000001629,ENSG00000002822,ENSG00000003756,ENSG00000004487,ENSG00000004766,ENSG00000005436,ENSG00000006125,ENSG00000006715,ENSG00000007062,ENSG00000008838,ENSG00000009307,ENSG00000009335,ENSG00000010292,ENSG00000011566,ENSG00000015133,ENSG00000015171,ENSG00000018189,ENSG00000023228,ENSG00000023892,ENSG00000027001,ENSG00000028116,ENSG00000030066,ENSG00000035681,ENSG00000036549,ENSG00000039123…
54	rna	negative	TF	Factor: Cdx-1; motif: TTTATK	TF:M02086	0.007847179264090736	4590	835	656	6295	ENSG00000001629,ENSG00000002822,ENSG00000003756,ENSG00000004487,ENSG00000004766,ENSG00000005436,ENSG00000006125,ENSG00000006715,ENSG00000007062,ENSG00000008838,ENSG00000009307,ENSG00000009335,ENSG00000010292,ENSG00000011566,ENSG00000015133,ENSG00000015171,ENSG00000018189,ENSG00000023228,ENSG00000023892,ENSG00000027001,ENSG00000028116,ENSG00000030066,ENSG00000035681,ENSG00000036549,ENSG00000039123…
55	rna	negative	TF	Factor: FOXM1; motif: TRTTTATNN	TF:M08883	0.008336322582243531	2001	835	316	6295	ENSG00000002822,ENSG00000005436,ENSG00000006125,ENSG00000006715,ENSG00000007062,ENSG00000009307,ENSG00000009335,ENSG00000010292,ENSG00000011566,ENSG00000015171,ENSG00000016864,ENSG00000018189,ENSG00000023228,ENSG00000027001,ENSG00000028116,ENSG00000036549,ENSG00000039123,ENSG00000039319,ENSG00000042088,ENSG00000043093,ENSG00000044459,ENSG00000048392,ENSG00000048991,ENSG00000054983,ENSG00000060982…
56	rna	negative	TF	Factor: FOXM1; motif: TRTTTATNN; match class: 0	TF:M08883_0	0.008336322582243531	2001	835	316	6295	ENSG00000002822,ENSG00000005436,ENSG00000006125,ENSG00000006715,ENSG00000007062,ENSG00000009307,ENSG00000009335,ENSG00000010292,ENSG00000011566,ENSG00000015171,ENSG00000016864,ENSG00000018189,ENSG00000023228,ENSG00000027001,ENSG00000028116,ENSG00000036549,ENSG00000039123,ENSG00000039319,ENSG00000042088,ENSG00000043093,ENSG00000044459,ENSG00000048392,ENSG00000048991,ENSG00000054983,ENSG00000060982…
57	rna	negative	TF	Factor: FOXO4; motif: RWAAACAANNN; match class: 0	TF:M00472_0	0.012312078921180582	278	835	60	6295	ENSG00000018189,ENSG00000023228,ENSG00000028116,ENSG00000039123,ENSG00000044459,ENSG00000048392,ENSG00000061794,ENSG00000071794,ENSG00000074603,ENSG00000080298,ENSG00000083642,ENSG00000085377,ENSG00000087470,ENSG00000090889,ENSG00000096063,ENSG00000100614,ENSG00000101493,ENSG00000103978,ENSG00000107902,ENSG00000108984,ENSG00000111581,ENSG00000112851,ENSG00000113569,ENSG00000115207,ENSG00000115306…
58	rna	negative	TF	Factor: FOXO4; motif: RWAAACAANNN	TF:M00472	0.012312078921180582	278	835	60	6295	ENSG00000018189,ENSG00000023228,ENSG00000028116,ENSG00000039123,ENSG00000044459,ENSG00000048392,ENSG00000061794,ENSG00000071794,ENSG00000074603,ENSG00000080298,ENSG00000083642,ENSG00000085377,ENSG00000087470,ENSG00000090889,ENSG00000096063,ENSG00000100614,ENSG00000101493,ENSG00000103978,ENSG00000107902,ENSG00000108984,ENSG00000111581,ENSG00000112851,ENSG00000113569,ENSG00000115207,ENSG00000115306…
59	rna	negative	TF	Factor: FOXJ3; motif: RTAAACAA	TF:M04249	0.012867527751398777	1145	835	193	6295	ENSG00000005436,ENSG00000018189,ENSG00000023228,ENSG00000027001,ENSG00000028116,ENSG00000039123,ENSG00000039319,ENSG00000043093,ENSG00000044459,ENSG00000048392,ENSG00000048991,ENSG00000054523,ENSG00000058673,ENSG00000061794,ENSG00000066279,ENSG00000068650,ENSG00000070501,ENSG00000071794,ENSG00000073578,ENSG00000074603,ENSG00000078018,ENSG00000079150,ENSG00000079246,ENSG00000079819,ENSG00000080298…
60	rna	negative	TF	Factor: FOXJ3; motif: RTAAACAA; match class: 0	TF:M04249_0	0.012867527751398777	1145	835	193	6295	ENSG00000005436,ENSG00000018189,ENSG00000023228,ENSG00000027001,ENSG00000028116,ENSG00000039123,ENSG00000039319,ENSG00000043093,ENSG00000044459,ENSG00000048392,ENSG00000048991,ENSG00000054523,ENSG00000058673,ENSG00000061794,ENSG00000066279,ENSG00000068650,ENSG00000070501,ENSG00000071794,ENSG00000073578,ENSG00000074603,ENSG00000078018,ENSG00000079150,ENSG00000079246,ENSG00000079819,ENSG00000080298…
61	rna	negative	TF	Factor: FOXO3; motif: TNNTTGTTTACNTW; match class: 0	TF:M00477_0	0.013164704330866906	735	835	132	6295	ENSG00000005436,ENSG00000008838,ENSG00000015171,ENSG00000018189,ENSG00000023228,ENSG00000027001,ENSG00000028116,ENSG00000039319,ENSG00000043093,ENSG00000046889,ENSG00000048392,ENSG00000048991,ENSG00000054654,ENSG00000061794,ENSG00000066279,ENSG00000070501,ENSG00000073578,ENSG00000078018,ENSG00000080298,ENSG00000083535,ENSG00000087470,ENSG00000088756,ENSG00000088930,ENSG00000100154,ENSG00000100614…
62	rna	negative	TF	Factor: OVOL; motif: ANRTAACGG; match class: 0	TF:M08894_0	0.013164704330866906	2862	835	431	6295	ENSG00000001629,ENSG00000002822,ENSG00000005436,ENSG00000006125,ENSG00000009307,ENSG00000011258,ENSG00000011295,ENSG00000015171,ENSG00000016864,ENSG00000018189,ENSG00000018510,ENSG00000023228,ENSG00000030066,ENSG00000035681,ENSG00000036549,ENSG00000039650,ENSG00000040341,ENSG00000042088,ENSG00000044459,ENSG00000046889,ENSG00000047188,ENSG00000047410,ENSG00000048392,ENSG00000048544,ENSG00000048991…
63	rna	negative	TF	Factor: OVOL; motif: ANRTAACGG	TF:M08894	0.013164704330866906	2862	835	431	6295	ENSG00000001629,ENSG00000002822,ENSG00000005436,ENSG00000006125,ENSG00000009307,ENSG00000011258,ENSG00000011295,ENSG00000015171,ENSG00000016864,ENSG00000018189,ENSG00000018510,ENSG00000023228,ENSG00000030066,ENSG00000035681,ENSG00000036549,ENSG00000039650,ENSG00000040341,ENSG00000042088,ENSG00000044459,ENSG00000046889,ENSG00000047188,ENSG00000047410,ENSG00000048392,ENSG00000048544,ENSG00000048991…
64	rna	negative	TF	Factor: FOXO3; motif: TNNTTGTTTACNTW	TF:M00477	0.013164704330866906	735	835	132	6295	ENSG00000005436,ENSG00000008838,ENSG00000015171,ENSG00000018189,ENSG00000023228,ENSG00000027001,ENSG00000028116,ENSG00000039319,ENSG00000043093,ENSG00000046889,ENSG00000048392,ENSG00000048991,ENSG00000054654,ENSG00000061794,ENSG00000066279,ENSG00000070501,ENSG00000073578,ENSG00000078018,ENSG00000080298,ENSG00000083535,ENSG00000087470,ENSG00000088756,ENSG00000088930,ENSG00000100154,ENSG00000100614…
65	rna	negative	TF	Factor: SATB1; motif: NTTTAT	TF:M03564	0.013573492788928313	5061	835	711	6295	ENSG00000001629,ENSG00000002822,ENSG00000003756,ENSG00000004487,ENSG00000004766,ENSG00000005436,ENSG00000006125,ENSG00000006715,ENSG00000007062,ENSG00000007202,ENSG00000008838,ENSG00000009307,ENSG00000009335,ENSG00000010292,ENSG00000011295,ENSG00000015133,ENSG00000015171,ENSG00000018189,ENSG00000018510,ENSG00000023228,ENSG00000023892,ENSG00000027001,ENSG00000028116,ENSG00000030066,ENSG00000035681…
66	rna	negative	TF	Factor: IRF-4; motif: AAGTTTC; match class: 0	TF:M04855_0	0.013573492788928313	2405	835	369	6295	ENSG00000004766,ENSG00000005436,ENSG00000006125,ENSG00000006715,ENSG00000008838,ENSG00000010292,ENSG00000011258,ENSG00000011295,ENSG00000013810,ENSG00000015133,ENSG00000015171,ENSG00000018189,ENSG00000018510,ENSG00000023892,ENSG00000027001,ENSG00000028116,ENSG00000036549,ENSG00000039123,ENSG00000039319,ENSG00000039650,ENSG00000043093,ENSG00000044459,ENSG00000047410,ENSG00000048544,ENSG00000051382…
67	rna	negative	TF	Factor: IRF-4; motif: AAGTTTC	TF:M04855	0.013573492788928313	2405	835	369	6295	ENSG00000004766,ENSG00000005436,ENSG00000006125,ENSG00000006715,ENSG00000008838,ENSG00000010292,ENSG00000011258,ENSG00000011295,ENSG00000013810,ENSG00000015133,ENSG00000015171,ENSG00000018189,ENSG00000018510,ENSG00000023892,ENSG00000027001,ENSG00000028116,ENSG00000036549,ENSG00000039123,ENSG00000039319,ENSG00000039650,ENSG00000043093,ENSG00000044459,ENSG00000047410,ENSG00000048544,ENSG00000051382…
68	rna	negative	TF	Factor: SATB1; motif: NTTTAT; match class: 0	TF:M03564_0	0.013573492788928313	5061	835	711	6295	ENSG00000001629,ENSG00000002822,ENSG00000003756,ENSG00000004487,ENSG00000004766,ENSG00000005436,ENSG00000006125,ENSG00000006715,ENSG00000007062,ENSG00000007202,ENSG00000008838,ENSG00000009307,ENSG00000009335,ENSG00000010292,ENSG00000011295,ENSG00000015133,ENSG00000015171,ENSG00000018189,ENSG00000018510,ENSG00000023228,ENSG00000023892,ENSG00000027001,ENSG00000028116,ENSG00000030066,ENSG00000035681…
69	rna	negative	TF	Factor: SRY; motif: TCAATAMCATTGA	TF:M04557	0.016721696832316377	2970	835	444	6295	ENSG00000001629,ENSG00000004487,ENSG00000004766,ENSG00000005436,ENSG00000006125,ENSG00000006715,ENSG00000007062,ENSG00000009307,ENSG00000010292,ENSG00000011258,ENSG00000015133,ENSG00000015171,ENSG00000016864,ENSG00000018189,ENSG00000018510,ENSG00000023228,ENSG00000027001,ENSG00000030066,ENSG00000039123,ENSG00000040341,ENSG00000042088,ENSG00000046889,ENSG00000047188,ENSG00000047410,ENSG00000048392…
70	rna	negative	TF	Factor: nanog; motif: CCATTAAAWNGTK; match class: 0	TF:M07362_0	0.016721696832316377	476	835	91	6295	ENSG00000004487,ENSG00000006125,ENSG00000023228,ENSG00000040341,ENSG00000047410,ENSG00000060982,ENSG00000061794,ENSG00000064933,ENSG00000065243,ENSG00000068489,ENSG00000069275,ENSG00000071794,ENSG00000075539,ENSG00000077063,ENSG00000077254,ENSG00000079819,ENSG00000080986,ENSG00000081019,ENSG00000083312,ENSG00000096063,ENSG00000100625,ENSG00000101407,ENSG00000101413,ENSG00000103978,ENSG00000104381…
71	rna	negative	TF	Factor: Freac-3; motif: NNNNNGTAAATAAACA	TF:M00291	0.016721696832316377	1575	835	253	6295	ENSG00000002822,ENSG00000004766,ENSG00000005436,ENSG00000006125,ENSG00000009307,ENSG00000009335,ENSG00000011295,ENSG00000015171,ENSG00000018510,ENSG00000023228,ENSG00000027001,ENSG00000039123,ENSG00000039319,ENSG00000042088,ENSG00000043093,ENSG00000044459,ENSG00000047188,ENSG00000048392,ENSG00000048544,ENSG00000054983,ENSG00000058673,ENSG00000058804,ENSG00000059588,ENSG00000060982,ENSG00000066279…
72	rna	negative	TF	Factor: Freac-3; motif: NNNNNGTAAATAAACA; match class: 0	TF:M00291_0	0.016721696832316377	1575	835	253	6295	ENSG00000002822,ENSG00000004766,ENSG00000005436,ENSG00000006125,ENSG00000009307,ENSG00000009335,ENSG00000011295,ENSG00000015171,ENSG00000018510,ENSG00000023228,ENSG00000027001,ENSG00000039123,ENSG00000039319,ENSG00000042088,ENSG00000043093,ENSG00000044459,ENSG00000047188,ENSG00000048392,ENSG00000048544,ENSG00000054983,ENSG00000058673,ENSG00000058804,ENSG00000059588,ENSG00000060982,ENSG00000066279…
73	rna	negative	TF	Factor: SRY; motif: TCAATAMCATTGA; match class: 0	TF:M04557_0	0.016721696832316377	2970	835	444	6295	ENSG00000001629,ENSG00000004487,ENSG00000004766,ENSG00000005436,ENSG00000006125,ENSG00000006715,ENSG00000007062,ENSG00000009307,ENSG00000010292,ENSG00000011258,ENSG00000015133,ENSG00000015171,ENSG00000016864,ENSG00000018189,ENSG00000018510,ENSG00000023228,ENSG00000027001,ENSG00000030066,ENSG00000039123,ENSG00000040341,ENSG00000042088,ENSG00000046889,ENSG00000047188,ENSG00000047410,ENSG00000048392…
74	rna	negative	TF	Factor: nanog; motif: CCATTAAAWNGTK	TF:M07362	0.016721696832316377	476	835	91	6295	ENSG00000004487,ENSG00000006125,ENSG00000023228,ENSG00000040341,ENSG00000047410,ENSG00000060982,ENSG00000061794,ENSG00000064933,ENSG00000065243,ENSG00000068489,ENSG00000069275,ENSG00000071794,ENSG00000075539,ENSG00000077063,ENSG00000077254,ENSG00000079819,ENSG00000080986,ENSG00000081019,ENSG00000083312,ENSG00000096063,ENSG00000100625,ENSG00000101407,ENSG00000101413,ENSG00000103978,ENSG00000104381…
75	rna	negative	TF	Factor: Sox-9; motif: NNNNNACAAARGNNSMN; match class: 1	TF:M07269_1	0.016958389690094458	1067	835	180	6295	ENSG00000004487,ENSG00000009307,ENSG00000011258,ENSG00000011295,ENSG00000011566,ENSG00000015133,ENSG00000023892,ENSG00000030066,ENSG00000044459,ENSG00000055163,ENSG00000061936,ENSG00000065054,ENSG00000065243,ENSG00000072042,ENSG00000072121,ENSG00000075340,ENSG00000076242,ENSG00000076604,ENSG00000079150,ENSG00000079246,ENSG00000081019,ENSG00000082212,ENSG00000083307,ENSG00000088756,ENSG00000092036…
76	rna	negative	TF	Factor: ZNF333; motif: ATAAT; match class: 1	TF:M01230_1	0.016958389690094458	3565	835	522	6295	ENSG00000004487,ENSG00000004766,ENSG00000005436,ENSG00000006125,ENSG00000006715,ENSG00000007062,ENSG00000007202,ENSG00000008838,ENSG00000009307,ENSG00000009335,ENSG00000010292,ENSG00000011295,ENSG00000011566,ENSG00000015171,ENSG00000018189,ENSG00000023892,ENSG00000028116,ENSG00000035681,ENSG00000036549,ENSG00000039123,ENSG00000039319,ENSG00000039650,ENSG00000040341,ENSG00000046889,ENSG00000047188…
77	rna	negative	TF	Factor: PMX1; motif: TAATHA; match class: 1	TF:M03560_1	0.018802088854118555	3126	835	464	6295	ENSG00000001629,ENSG00000003756,ENSG00000004487,ENSG00000004766,ENSG00000006125,ENSG00000006715,ENSG00000007062,ENSG00000007202,ENSG00000008838,ENSG00000009307,ENSG00000010292,ENSG00000011295,ENSG00000011566,ENSG00000015171,ENSG00000023228,ENSG00000027001,ENSG00000028116,ENSG00000036549,ENSG00000039123,ENSG00000040341,ENSG00000042088,ENSG00000043093,ENSG00000046889,ENSG00000047188,ENSG00000048544…
78	rna	negative	TF	Factor: ZNF333; motif: ATAAT	TF:M01230	0.018979937324769658	4916	835	692	6295	ENSG00000002822,ENSG00000003756,ENSG00000004487,ENSG00000004766,ENSG00000005436,ENSG00000006125,ENSG00000006715,ENSG00000007062,ENSG00000007202,ENSG00000008838,ENSG00000009307,ENSG00000009335,ENSG00000010292,ENSG00000011295,ENSG00000011566,ENSG00000015133,ENSG00000015171,ENSG00000016864,ENSG00000018189,ENSG00000018510,ENSG00000023228,ENSG00000023892,ENSG00000027001,ENSG00000028116,ENSG00000030066…
79	rna	negative	TF	Factor: ZNF333; motif: ATAAT; match class: 0	TF:M01230_0	0.018979937324769658	4916	835	692	6295	ENSG00000002822,ENSG00000003756,ENSG00000004487,ENSG00000004766,ENSG00000005436,ENSG00000006125,ENSG00000006715,ENSG00000007062,ENSG00000007202,ENSG00000008838,ENSG00000009307,ENSG00000009335,ENSG00000010292,ENSG00000011295,ENSG00000011566,ENSG00000015133,ENSG00000015171,ENSG00000016864,ENSG00000018189,ENSG00000018510,ENSG00000023228,ENSG00000023892,ENSG00000027001,ENSG00000028116,ENSG00000030066…
80	rna	negative	TF	Factor: FOXO1; motif: GTAAACATGTTTAC; match class: 0	TF:M04256_0	0.02534406765825016	1104	835	184	6295	ENSG00000007062,ENSG00000007202,ENSG00000009335,ENSG00000010292,ENSG00000028116,ENSG00000042088,ENSG00000043093,ENSG00000047188,ENSG00000048991,ENSG00000051382,ENSG00000057608,ENSG00000058673,ENSG00000060982,ENSG00000066279,ENSG00000070501,ENSG00000073578,ENSG00000074603,ENSG00000077254,ENSG00000078018,ENSG00000079150,ENSG00000079819,ENSG00000083307,ENSG00000083312,ENSG00000089050,ENSG00000094916…
81	rna	negative	TF	Factor: FOXO1; motif: GTAAACATGTTTAC	TF:M04256	0.02534406765825016	1104	835	184	6295	ENSG00000007062,ENSG00000007202,ENSG00000009335,ENSG00000010292,ENSG00000028116,ENSG00000042088,ENSG00000043093,ENSG00000047188,ENSG00000048991,ENSG00000051382,ENSG00000057608,ENSG00000058673,ENSG00000060982,ENSG00000066279,ENSG00000070501,ENSG00000073578,ENSG00000074603,ENSG00000077254,ENSG00000078018,ENSG00000079150,ENSG00000079819,ENSG00000083307,ENSG00000083312,ENSG00000089050,ENSG00000094916…
82	rna	negative	TF	Factor: HNF-3alpha; motif: RYAAACAN; match class: 0	TF:M03827_0	0.026049175194382653	370	835	73	6295	ENSG00000035681,ENSG00000048991,ENSG00000058091,ENSG00000060982,ENSG00000064933,ENSG00000068489,ENSG00000080986,ENSG00000083307,ENSG00000083312,ENSG00000087470,ENSG00000092140,ENSG00000099995,ENSG00000101266,ENSG00000101680,ENSG00000102743,ENSG00000103510,ENSG00000103978,ENSG00000107186,ENSG00000107679,ENSG00000107902,ENSG00000109586,ENSG00000110756,ENSG00000112282,ENSG00000113300,ENSG00000116199…
83	rna	negative	TF	Factor: HNF-3alpha; motif: RYAAACAN	TF:M03827	0.026049175194382653	370	835	73	6295	ENSG00000035681,ENSG00000048991,ENSG00000058091,ENSG00000060982,ENSG00000064933,ENSG00000068489,ENSG00000080986,ENSG00000083307,ENSG00000083312,ENSG00000087470,ENSG00000092140,ENSG00000099995,ENSG00000101266,ENSG00000101680,ENSG00000102743,ENSG00000103510,ENSG00000103978,ENSG00000107186,ENSG00000107679,ENSG00000107902,ENSG00000109586,ENSG00000110756,ENSG00000112282,ENSG00000113300,ENSG00000116199…
84	rna	negative	TF	Factor: Sox-4; motif: AACAAA; match class: 0	TF:M03849_0	0.028795618851699845	4563	835	647	6295	ENSG00000001629,ENSG00000002822,ENSG00000003756,ENSG00000004487,ENSG00000004766,ENSG00000005436,ENSG00000006125,ENSG00000006715,ENSG00000007062,ENSG00000007202,ENSG00000008838,ENSG00000009307,ENSG00000011295,ENSG00000011566,ENSG00000013810,ENSG00000015133,ENSG00000015171,ENSG00000018189,ENSG00000023228,ENSG00000023892,ENSG00000028116,ENSG00000030066,ENSG00000039123,ENSG00000039319,ENSG00000040341…
85	rna	negative	TF	Factor: Sox-4; motif: AACAAA	TF:M03849	0.028795618851699845	4563	835	647	6295	ENSG00000001629,ENSG00000002822,ENSG00000003756,ENSG00000004487,ENSG00000004766,ENSG00000005436,ENSG00000006125,ENSG00000006715,ENSG00000007062,ENSG00000007202,ENSG00000008838,ENSG00000009307,ENSG00000011295,ENSG00000011566,ENSG00000013810,ENSG00000015133,ENSG00000015171,ENSG00000018189,ENSG00000023228,ENSG00000023892,ENSG00000028116,ENSG00000030066,ENSG00000039123,ENSG00000039319,ENSG00000040341…
86	rna	negative	TF	Factor: Tst-1; motif: NNKGAATTAVAVTDN; match class: 0	TF:M00133_0	0.029282589675402638	1728	835	272	6295	ENSG00000001629,ENSG00000009307,ENSG00000010292,ENSG00000011295,ENSG00000015133,ENSG00000015171,ENSG00000027001,ENSG00000039650,ENSG00000040341,ENSG00000044459,ENSG00000047188,ENSG00000047410,ENSG00000048544,ENSG00000054523,ENSG00000054654,ENSG00000056097,ENSG00000057608,ENSG00000058673,ENSG00000061794,ENSG00000064933,ENSG00000066279,ENSG00000069248,ENSG00000070501,ENSG00000072121,ENSG00000074266…
87	rna	negative	TF	Factor: Tst-1; motif: NNKGAATTAVAVTDN	TF:M00133	0.029282589675402638	1728	835	272	6295	ENSG00000001629,ENSG00000009307,ENSG00000010292,ENSG00000011295,ENSG00000015133,ENSG00000015171,ENSG00000027001,ENSG00000039650,ENSG00000040341,ENSG00000044459,ENSG00000047188,ENSG00000047410,ENSG00000048544,ENSG00000054523,ENSG00000054654,ENSG00000056097,ENSG00000057608,ENSG00000058673,ENSG00000061794,ENSG00000064933,ENSG00000066279,ENSG00000069248,ENSG00000070501,ENSG00000072121,ENSG00000074266…
88	rna	negative	TF	Factor: SATB1; motif: NTTTAT; match class: 1	TF:M03564_1	0.02970375806691768	3716	835	539	6295	ENSG00000002822,ENSG00000003756,ENSG00000004487,ENSG00000004766,ENSG00000005436,ENSG00000006125,ENSG00000006715,ENSG00000007062,ENSG00000007202,ENSG00000008838,ENSG00000009307,ENSG00000009335,ENSG00000010292,ENSG00000015133,ENSG00000015171,ENSG00000018189,ENSG00000018510,ENSG00000023228,ENSG00000027001,ENSG00000028116,ENSG00000030066,ENSG00000035681,ENSG00000039123,ENSG00000039319,ENSG00000039650…
89	rna	negative	TF	Factor: E2F1; motif: NNNNNGCGSSAAAN; match class: 1	TF:M08874_1	0.02978308792667045	959	835	162	6295	ENSG00000005436,ENSG00000009335,ENSG00000011566,ENSG00000015171,ENSG00000043355,ENSG00000044459,ENSG00000053371,ENSG00000054654,ENSG00000055163,ENSG00000056097,ENSG00000057019,ENSG00000057608,ENSG00000058091,ENSG00000061936,ENSG00000064933,ENSG00000068489,ENSG00000075340,ENSG00000075539,ENSG00000077063,ENSG00000078177,ENSG00000080298,ENSG00000082212,ENSG00000082213,ENSG00000083535,ENSG00000083720…
90	rna	negative	TF	Factor: MNX1; motif: NNYAATTAAN	TF:M04403	0.02978308792667045	743	835	130	6295	ENSG00000007202,ENSG00000008838,ENSG00000009307,ENSG00000023228,ENSG00000027001,ENSG00000036549,ENSG00000040341,ENSG00000043093,ENSG00000057019,ENSG00000060982,ENSG00000061794,ENSG00000066279,ENSG00000068489,ENSG00000069248,ENSG00000076382,ENSG00000081087,ENSG00000081307,ENSG00000084444,ENSG00000087470,ENSG00000089050,ENSG00000094916,ENSG00000099204,ENSG00000099219,ENSG00000100038,ENSG00000100625…
91	rna	negative	TF	Factor: MNX1; motif: NNYAATTAAN; match class: 0	TF:M04403_0	0.02978308792667045	743	835	130	6295	ENSG00000007202,ENSG00000008838,ENSG00000009307,ENSG00000023228,ENSG00000027001,ENSG00000036549,ENSG00000040341,ENSG00000043093,ENSG00000057019,ENSG00000060982,ENSG00000061794,ENSG00000066279,ENSG00000068489,ENSG00000069248,ENSG00000076382,ENSG00000081087,ENSG00000081307,ENSG00000084444,ENSG00000087470,ENSG00000089050,ENSG00000094916,ENSG00000099204,ENSG00000099219,ENSG00000100038,ENSG00000100625…
92	rna	negative	TF	Factor: CDP; motif: ATCGATNNNNNATCRAT; match class: 0	TF:M03950_0	0.0326133989255143	1168	835	192	6295	ENSG00000007062,ENSG00000008838,ENSG00000009335,ENSG00000011295,ENSG00000011566,ENSG00000015133,ENSG00000018189,ENSG00000028116,ENSG00000035681,ENSG00000039123,ENSG00000047188,ENSG00000047410,ENSG00000058056,ENSG00000058804,ENSG00000059588,ENSG00000066279,ENSG00000069248,ENSG00000071051,ENSG00000071794,ENSG00000072042,ENSG00000077254,ENSG00000078018,ENSG00000078043,ENSG00000079150,ENSG00000081019…
93	rna	negative	TF	Factor: CDP; motif: ATCGATNNNNNATCRAT	TF:M03950	0.0326133989255143	1168	835	192	6295	ENSG00000007062,ENSG00000008838,ENSG00000009335,ENSG00000011295,ENSG00000011566,ENSG00000015133,ENSG00000018189,ENSG00000028116,ENSG00000035681,ENSG00000039123,ENSG00000047188,ENSG00000047410,ENSG00000058056,ENSG00000058804,ENSG00000059588,ENSG00000066279,ENSG00000069248,ENSG00000071051,ENSG00000071794,ENSG00000072042,ENSG00000077254,ENSG00000078018,ENSG00000078043,ENSG00000079150,ENSG00000081019…
94	rna	negative	TF	Factor: ALX3; motif: NNYAATTANN	TF:M04279	0.035299072679092776	1094	835	181	6295	ENSG00000007202,ENSG00000008838,ENSG00000009307,ENSG00000023228,ENSG00000028116,ENSG00000036549,ENSG00000040341,ENSG00000043093,ENSG00000048544,ENSG00000048991,ENSG00000057019,ENSG00000060982,ENSG00000061794,ENSG00000066279,ENSG00000068489,ENSG00000069248,ENSG00000070501,ENSG00000071051,ENSG00000077254,ENSG00000078018,ENSG00000079819,ENSG00000081307,ENSG00000083312,ENSG00000084444,ENSG00000087470…
95	rna	negative	TF	Factor: ALX3; motif: NNYAATTANN; match class: 0	TF:M04279_0	0.035299072679092776	1094	835	181	6295	ENSG00000007202,ENSG00000008838,ENSG00000009307,ENSG00000023228,ENSG00000028116,ENSG00000036549,ENSG00000040341,ENSG00000043093,ENSG00000048544,ENSG00000048991,ENSG00000057019,ENSG00000060982,ENSG00000061794,ENSG00000066279,ENSG00000068489,ENSG00000069248,ENSG00000070501,ENSG00000071051,ENSG00000077254,ENSG00000078018,ENSG00000079819,ENSG00000081307,ENSG00000083312,ENSG00000084444,ENSG00000087470…
96	rna	negative	TF	Factor: FOXC2; motif: WAWGTAAACAWW	TF:M04237	0.03796198764989697	428	835	81	6295	ENSG00000002822,ENSG00000005436,ENSG00000006125,ENSG00000010292,ENSG00000039319,ENSG00000043093,ENSG00000048544,ENSG00000048991,ENSG00000066279,ENSG00000069248,ENSG00000073578,ENSG00000079819,ENSG00000083312,ENSG00000086200,ENSG00000100612,ENSG00000100997,ENSG00000101407,ENSG00000101413,ENSG00000105854,ENSG00000108852,ENSG00000112282,ENSG00000112983,ENSG00000112984,ENSG00000113569,ENSG00000113597…
97	rna	negative	TF	Factor: TEF-3; motif: GNTATTTTT; match class: 0	TF:M07270_0	0.03796198764989697	3116	835	459	6295	ENSG00000001629,ENSG00000002822,ENSG00000003756,ENSG00000004487,ENSG00000004766,ENSG00000005436,ENSG00000006715,ENSG00000007202,ENSG00000009335,ENSG00000010292,ENSG00000011295,ENSG00000011566,ENSG00000018189,ENSG00000018510,ENSG00000023228,ENSG00000027001,ENSG00000028116,ENSG00000039319,ENSG00000040341,ENSG00000042088,ENSG00000043355,ENSG00000046889,ENSG00000047188,ENSG00000048392,ENSG00000048544…
98	rna	negative	TF	Factor: TEF-3; motif: GNTATTTTT	TF:M07270	0.03796198764989697	3116	835	459	6295	ENSG00000001629,ENSG00000002822,ENSG00000003756,ENSG00000004487,ENSG00000004766,ENSG00000005436,ENSG00000006715,ENSG00000007202,ENSG00000009335,ENSG00000010292,ENSG00000011295,ENSG00000011566,ENSG00000018189,ENSG00000018510,ENSG00000023228,ENSG00000027001,ENSG00000028116,ENSG00000039319,ENSG00000040341,ENSG00000042088,ENSG00000043355,ENSG00000046889,ENSG00000047188,ENSG00000048392,ENSG00000048544…
99	rna	negative	TF	Factor: GATA-1; motif: NCWGATAACA; match class: 0	TF:M00346_0	0.03796198764989697	1278	835	207	6295	ENSG00000004487,ENSG00000005436,ENSG00000006125,ENSG00000007202,ENSG00000010292,ENSG00000015171,ENSG00000028116,ENSG00000036549,ENSG00000039123,ENSG00000040341,ENSG00000046889,ENSG00000047188,ENSG00000048392,ENSG00000048544,ENSG00000048991,ENSG00000054654,ENSG00000054983,ENSG00000058804,ENSG00000061936,ENSG00000068489,ENSG00000074266,ENSG00000075539,ENSG00000078043,ENSG00000078177,ENSG00000079150…
100	rna	negative	TF	Factor: FOXC2; motif: WAWGTAAACAWW; match class: 0	TF:M04237_0	0.03796198764989697	428	835	81	6295	ENSG00000002822,ENSG00000005436,ENSG00000006125,ENSG00000010292,ENSG00000039319,ENSG00000043093,ENSG00000048544,ENSG00000048991,ENSG00000066279,ENSG00000069248,ENSG00000073578,ENSG00000079819,ENSG00000083312,ENSG00000086200,ENSG00000100612,ENSG00000100997,ENSG00000101407,ENSG00000101413,ENSG00000105854,ENSG00000108852,ENSG00000112282,ENSG00000112983,ENSG00000112984,ENSG00000113569,ENSG00000113597…
101	rna	negative	TF	Factor: GATA-1; motif: NCWGATAACA	TF:M00346	0.03796198764989697	1278	835	207	6295	ENSG00000004487,ENSG00000005436,ENSG00000006125,ENSG00000007202,ENSG00000010292,ENSG00000015171,ENSG00000028116,ENSG00000036549,ENSG00000039123,ENSG00000040341,ENSG00000046889,ENSG00000047188,ENSG00000048392,ENSG00000048544,ENSG00000048991,ENSG00000054654,ENSG00000054983,ENSG00000058804,ENSG00000061936,ENSG00000068489,ENSG00000074266,ENSG00000075539,ENSG00000078043,ENSG00000078177,ENSG00000079150…
102	rna	negative	TF	Factor: HNF-3beta; motif: TGTTTACWYWG	TF:M09619	0.038451917385928736	967	835	162	6295	ENSG00000006125,ENSG00000007062,ENSG00000009307,ENSG00000009335,ENSG00000010292,ENSG00000027001,ENSG00000039319,ENSG00000042088,ENSG00000043093,ENSG00000044459,ENSG00000047410,ENSG00000048392,ENSG00000058673,ENSG00000060982,ENSG00000066279,ENSG00000068489,ENSG00000069248,ENSG00000070501,ENSG00000073578,ENSG00000076382,ENSG00000078018,ENSG00000078043,ENSG00000079819,ENSG00000080298,ENSG00000083312…
103	rna	negative	TF	Factor: HNF-3beta; motif: TGTTTACWYWG; match class: 0	TF:M09619_0	0.038451917385928736	967	835	162	6295	ENSG00000006125,ENSG00000007062,ENSG00000009307,ENSG00000009335,ENSG00000010292,ENSG00000027001,ENSG00000039319,ENSG00000042088,ENSG00000043093,ENSG00000044459,ENSG00000047410,ENSG00000048392,ENSG00000058673,ENSG00000060982,ENSG00000066279,ENSG00000068489,ENSG00000069248,ENSG00000070501,ENSG00000073578,ENSG00000076382,ENSG00000078018,ENSG00000078043,ENSG00000079819,ENSG00000080298,ENSG00000083312…
104	rna	negative	TF	Factor: Sox-9; motif: NNNNAACAATRGNN; match class: 0	TF:M00410_0	0.03905209406359288	1168	835	191	6295	ENSG00000004487,ENSG00000004766,ENSG00000005436,ENSG00000008838,ENSG00000010292,ENSG00000011566,ENSG00000015171,ENSG00000018189,ENSG00000018510,ENSG00000028116,ENSG00000030066,ENSG00000044459,ENSG00000046889,ENSG00000048991,ENSG00000054523,ENSG00000054983,ENSG00000058091,ENSG00000058804,ENSG00000060982,ENSG00000064933,ENSG00000069248,ENSG00000070087,ENSG00000070501,ENSG00000071051,ENSG00000074603…
105	rna	negative	TF	Factor: Sox-9; motif: NNNNAACAATRGNN	TF:M00410	0.03905209406359288	1168	835	191	6295	ENSG00000004487,ENSG00000004766,ENSG00000005436,ENSG00000008838,ENSG00000010292,ENSG00000011566,ENSG00000015171,ENSG00000018189,ENSG00000018510,ENSG00000028116,ENSG00000030066,ENSG00000044459,ENSG00000046889,ENSG00000048991,ENSG00000054523,ENSG00000054983,ENSG00000058091,ENSG00000058804,ENSG00000060982,ENSG00000064933,ENSG00000069248,ENSG00000070087,ENSG00000070501,ENSG00000071051,ENSG00000074603…
106	rna	negative	TF	Factor: Pit-1; motif: NMTTCATAAWTATWNMNA; match class: 0	TF:M00802_0	0.04241381206245829	1268	835	205	6295	ENSG00000002822,ENSG00000004766,ENSG00000006125,ENSG00000006715,ENSG00000008838,ENSG00000009307,ENSG00000009335,ENSG00000010292,ENSG00000018189,ENSG00000028116,ENSG00000039319,ENSG00000039650,ENSG00000047188,ENSG00000047410,ENSG00000048991,ENSG00000058673,ENSG00000058804,ENSG00000059588,ENSG00000069248,ENSG00000070087,ENSG00000071051,ENSG00000072121,ENSG00000074266,ENSG00000074603,ENSG00000076382…
107	rna	negative	TF	Factor: Pit-1; motif: NMTTCATAAWTATWNMNA	TF:M00802	0.04241381206245829	1268	835	205	6295	ENSG00000002822,ENSG00000004766,ENSG00000006125,ENSG00000006715,ENSG00000008838,ENSG00000009307,ENSG00000009335,ENSG00000010292,ENSG00000018189,ENSG00000028116,ENSG00000039319,ENSG00000039650,ENSG00000047188,ENSG00000047410,ENSG00000048991,ENSG00000058673,ENSG00000058804,ENSG00000059588,ENSG00000069248,ENSG00000070087,ENSG00000071051,ENSG00000072121,ENSG00000074266,ENSG00000074603,ENSG00000076382…
108	rna	negative	TF	Factor: GSX2; motif: NNYMATTANN	TF:M04328	0.04879816216911701	1769	835	275	6295	ENSG00000007202,ENSG00000008838,ENSG00000009307,ENSG00000018189,ENSG00000023228,ENSG00000027001,ENSG00000028116,ENSG00000036549,ENSG00000040341,ENSG00000043093,ENSG00000048544,ENSG00000048991,ENSG00000057019,ENSG00000060982,ENSG00000061794,ENSG00000066279,ENSG00000068489,ENSG00000069248,ENSG00000070501,ENSG00000071051,ENSG00000074603,ENSG00000076382,ENSG00000077254,ENSG00000078018,ENSG00000079150…
109	rna	negative	TF	Factor: GSX2; motif: NNYMATTANN; match class: 0	TF:M04328_0	0.04879816216911701	1769	835	275	6295	ENSG00000007202,ENSG00000008838,ENSG00000009307,ENSG00000018189,ENSG00000023228,ENSG00000027001,ENSG00000028116,ENSG00000036549,ENSG00000040341,ENSG00000043093,ENSG00000048544,ENSG00000048991,ENSG00000057019,ENSG00000060982,ENSG00000061794,ENSG00000066279,ENSG00000068489,ENSG00000069248,ENSG00000070501,ENSG00000071051,ENSG00000074603,ENSG00000076382,ENSG00000077254,ENSG00000078018,ENSG00000079150…
110	rna	negative	TF	Factor: Sox-10; motif: CWTTGTN; match class: 0	TF:M01131_0	0.049853179205950685	2745	835	408	6295	ENSG00000002822,ENSG00000004487,ENSG00000004766,ENSG00000005436,ENSG00000006125,ENSG00000006715,ENSG00000007202,ENSG00000009307,ENSG00000009335,ENSG00000011258,ENSG00000011295,ENSG00000011566,ENSG00000015133,ENSG00000018189,ENSG00000023892,ENSG00000028116,ENSG00000030066,ENSG00000035681,ENSG00000039650,ENSG00000042088,ENSG00000044459,ENSG00000047188,ENSG00000048544,ENSG00000048991,ENSG00000051382…
111	rna	negative	TF	Factor: Sox-10; motif: CWTTGTN	TF:M01131	0.049853179205950685	2745	835	408	6295	ENSG00000002822,ENSG00000004487,ENSG00000004766,ENSG00000005436,ENSG00000006125,ENSG00000006715,ENSG00000007202,ENSG00000009307,ENSG00000009335,ENSG00000011258,ENSG00000011295,ENSG00000011566,ENSG00000015133,ENSG00000018189,ENSG00000023892,ENSG00000028116,ENSG00000030066,ENSG00000035681,ENSG00000039650,ENSG00000042088,ENSG00000044459,ENSG00000047188,ENSG00000048544,ENSG00000048991,ENSG00000051382…
0	rna	positive	GO:BP	anatomical structure development	GO:0048856	0.0007976600505087625	1985	516	224	5979	ENSG00000004961,ENSG00000007402,ENSG00000007866,ENSG00000014216,ENSG00000019582,ENSG00000021826,ENSG00000022267,ENSG00000024422,ENSG00000029993,ENSG00000031698,ENSG00000046651,ENSG00000046653,ENSG00000052344,ENSG00000058668,ENSG00000061273,ENSG00000063660,ENSG00000066629,ENSG00000067225,ENSG00000068323,ENSG00000068366,ENSG00000069869,ENSG00000070770,ENSG00000071127,ENSG00000072062,ENSG00000075624…
1	rna	positive	GO:BP	multicellular organismal process	GO:0032501	0.0007976600505087625	2294	516	252	5979	ENSG00000004961,ENSG00000007402,ENSG00000007866,ENSG00000014216,ENSG00000019582,ENSG00000021826,ENSG00000022267,ENSG00000024422,ENSG00000029993,ENSG00000031698,ENSG00000034152,ENSG00000046651,ENSG00000046653,ENSG00000052344,ENSG00000058668,ENSG00000061273,ENSG00000063660,ENSG00000066629,ENSG00000067113,ENSG00000067225,ENSG00000068323,ENSG00000068366,ENSG00000069869,ENSG00000070770,ENSG00000071127…
2	rna	positive	GO:BP	actin filament-based process	GO:0030029	0.0015550391752842862	370	516	59	5979	ENSG00000024422,ENSG00000042493,ENSG00000046653,ENSG00000071127,ENSG00000075624,ENSG00000089159,ENSG00000092820,ENSG00000095637,ENSG00000100092,ENSG00000102024,ENSG00000103187,ENSG00000106299,ENSG00000107438,ENSG00000108830,ENSG00000109062,ENSG00000110880,ENSG00000116670,ENSG00000120860,ENSG00000124507,ENSG00000125733,ENSG00000125753,ENSG00000125868,ENSG00000125968,ENSG00000127831,ENSG00000130176…
3	rna	positive	GO:BP	response to external stimulus	GO:0009605	0.0015550391752842862	861	516	112	5979	ENSG00000019582,ENSG00000021826,ENSG00000029993,ENSG00000038532,ENSG00000039523,ENSG00000063660,ENSG00000067225,ENSG00000068366,ENSG00000072062,ENSG00000076944,ENSG00000077150,ENSG00000088305,ENSG00000092820,ENSG00000096060,ENSG00000096717,ENSG00000101347,ENSG00000101843,ENSG00000101871,ENSG00000101966,ENSG00000102096,ENSG00000102103,ENSG00000102580,ENSG00000103187,ENSG00000104518,ENSG00000106299…
4	rna	positive	GO:BP	developmental process	GO:0032502	0.0015550391752842862	2150	516	236	5979	ENSG00000004961,ENSG00000007402,ENSG00000007866,ENSG00000014216,ENSG00000019582,ENSG00000021826,ENSG00000022267,ENSG00000024422,ENSG00000029993,ENSG00000031698,ENSG00000046651,ENSG00000046653,ENSG00000052344,ENSG00000058668,ENSG00000061273,ENSG00000063660,ENSG00000066629,ENSG00000067225,ENSG00000068323,ENSG00000068366,ENSG00000069869,ENSG00000070770,ENSG00000071127,ENSG00000072062,ENSG00000072501…
5	rna	positive	GO:BP	actin cytoskeleton organization	GO:0030036	0.0015550391752842862	336	516	55	5979	ENSG00000024422,ENSG00000042493,ENSG00000046653,ENSG00000071127,ENSG00000075624,ENSG00000089159,ENSG00000092820,ENSG00000095637,ENSG00000100092,ENSG00000102024,ENSG00000103187,ENSG00000106299,ENSG00000107438,ENSG00000108830,ENSG00000109062,ENSG00000110880,ENSG00000116670,ENSG00000120860,ENSG00000124507,ENSG00000125733,ENSG00000125753,ENSG00000125868,ENSG00000125968,ENSG00000127831,ENSG00000130176…
6	rna	positive	GO:BP	cell differentiation	GO:0030154	0.0015550391752842862	1356	516	161	5979	ENSG00000007402,ENSG00000007866,ENSG00000014216,ENSG00000019582,ENSG00000021826,ENSG00000022267,ENSG00000024422,ENSG00000029993,ENSG00000046653,ENSG00000052344,ENSG00000061273,ENSG00000063660,ENSG00000066629,ENSG00000068323,ENSG00000068366,ENSG00000069869,ENSG00000071127,ENSG00000072062,ENSG00000075624,ENSG00000077150,ENSG00000078808,ENSG00000087842,ENSG00000088305,ENSG00000089159,ENSG00000092820…
7	rna	positive	GO:BP	regulation of localization	GO:0032879	0.0016986456452509318	984	516	124	5979	ENSG00000005022,ENSG00000007402,ENSG00000014216,ENSG00000019582,ENSG00000022267,ENSG00000024422,ENSG00000034152,ENSG00000039523,ENSG00000046653,ENSG00000052344,ENSG00000055483,ENSG00000058668,ENSG00000061273,ENSG00000063660,ENSG00000068366,ENSG00000068400,ENSG00000069869,ENSG00000070770,ENSG00000071127,ENSG00000072062,ENSG00000072786,ENSG00000075624,ENSG00000076706,ENSG00000076716,ENSG00000076944…
8	rna	positive	GO:BP	actin filament organization	GO:0007015	0.002229925856750166	197	516	37	5979	ENSG00000042493,ENSG00000071127,ENSG00000089159,ENSG00000092820,ENSG00000095637,ENSG00000100092,ENSG00000102024,ENSG00000103187,ENSG00000106299,ENSG00000108830,ENSG00000110880,ENSG00000116670,ENSG00000120860,ENSG00000124507,ENSG00000125753,ENSG00000125868,ENSG00000125968,ENSG00000127831,ENSG00000133789,ENSG00000135596,ENSG00000136167,ENSG00000140416,ENSG00000146950,ENSG00000147010,ENSG00000147202…
9	rna	positive	GO:BP	protein localization to plasma membrane	GO:0072659	0.002229925856750166	144	516	30	5979	ENSG00000024422,ENSG00000068400,ENSG00000075624,ENSG00000092820,ENSG00000095637,ENSG00000101246,ENSG00000105221,ENSG00000109062,ENSG00000110651,ENSG00000123240,ENSG00000124507,ENSG00000127831,ENSG00000130702,ENSG00000130762,ENSG00000132612,ENSG00000133961,ENSG00000143545,ENSG00000157978,ENSG00000161011,ENSG00000161203,ENSG00000165527,ENSG00000166900,ENSG00000170310,ENSG00000171552,ENSG00000175115…
10	rna	positive	GO:BP	wound healing	GO:0042060	0.0022951181552588245	198	516	37	5979	ENSG00000024422,ENSG00000067225,ENSG00000072062,ENSG00000075624,ENSG00000076706,ENSG00000101335,ENSG00000105767,ENSG00000108821,ENSG00000110651,ENSG00000111679,ENSG00000116478,ENSG00000118898,ENSG00000127831,ENSG00000130203,ENSG00000135046,ENSG00000135596,ENSG00000138119,ENSG00000138685,ENSG00000140416,ENSG00000147044,ENSG00000147251,ENSG00000147439,ENSG00000152661,ENSG00000155760,ENSG00000159753…
11	rna	positive	GO:BP	supramolecular fiber organization	GO:0097435	0.0024989337305002302	323	516	52	5979	ENSG00000042493,ENSG00000071127,ENSG00000083444,ENSG00000089159,ENSG00000092820,ENSG00000095637,ENSG00000100092,ENSG00000101871,ENSG00000102024,ENSG00000103187,ENSG00000104833,ENSG00000106299,ENSG00000106397,ENSG00000108821,ENSG00000108830,ENSG00000110880,ENSG00000116670,ENSG00000120860,ENSG00000120885,ENSG00000124507,ENSG00000125753,ENSG00000125868,ENSG00000125968,ENSG00000127831,ENSG00000129680…
12	rna	positive	GO:BP	regulation of protein localization to plasma membrane	GO:1903076	0.0024989337305002302	53	516	16	5979	ENSG00000068400,ENSG00000075624,ENSG00000092820,ENSG00000095637,ENSG00000127831,ENSG00000130762,ENSG00000132612,ENSG00000133961,ENSG00000157978,ENSG00000161011,ENSG00000161203,ENSG00000165527,ENSG00000166900,ENSG00000170310,ENSG00000171552,ENSG00000177105
13	rna	positive	GO:BP	cell motility	GO:0048870	0.0028073843427802577	523	516	74	5979	ENSG00000019582,ENSG00000034152,ENSG00000039523,ENSG00000058668,ENSG00000061273,ENSG00000063660,ENSG00000067113,ENSG00000071127,ENSG00000072786,ENSG00000075624,ENSG00000076706,ENSG00000076716,ENSG00000089159,ENSG00000096717,ENSG00000100092,ENSG00000105221,ENSG00000105767,ENSG00000106299,ENSG00000108821,ENSG00000108830,ENSG00000109062,ENSG00000110651,ENSG00000110880,ENSG00000111679,ENSG00000114353…
14	rna	positive	GO:BP	cellular developmental process	GO:0048869	0.0028073843427802577	1451	516	167	5979	ENSG00000007402,ENSG00000007866,ENSG00000014216,ENSG00000019582,ENSG00000021826,ENSG00000022267,ENSG00000024422,ENSG00000029993,ENSG00000046653,ENSG00000052344,ENSG00000061273,ENSG00000063660,ENSG00000066629,ENSG00000068323,ENSG00000068366,ENSG00000069869,ENSG00000071127,ENSG00000072062,ENSG00000075624,ENSG00000077150,ENSG00000078808,ENSG00000087842,ENSG00000088305,ENSG00000089159,ENSG00000092820…
15	rna	positive	GO:BP	locomotion	GO:0040011	0.0028073843427802577	597	516	82	5979	ENSG00000019582,ENSG00000034152,ENSG00000039523,ENSG00000058668,ENSG00000061273,ENSG00000063660,ENSG00000067113,ENSG00000069869,ENSG00000071127,ENSG00000072786,ENSG00000075624,ENSG00000076706,ENSG00000076716,ENSG00000089159,ENSG00000092820,ENSG00000096717,ENSG00000100092,ENSG00000101421,ENSG00000105221,ENSG00000105767,ENSG00000106299,ENSG00000108821,ENSG00000108830,ENSG00000109062,ENSG00000110651…
16	rna	positive	GO:BP	localization of cell	GO:0051674	0.0028073843427802577	523	516	74	5979	ENSG00000019582,ENSG00000034152,ENSG00000039523,ENSG00000058668,ENSG00000061273,ENSG00000063660,ENSG00000067113,ENSG00000071127,ENSG00000072786,ENSG00000075624,ENSG00000076706,ENSG00000076716,ENSG00000089159,ENSG00000096717,ENSG00000100092,ENSG00000105221,ENSG00000105767,ENSG00000106299,ENSG00000108821,ENSG00000108830,ENSG00000109062,ENSG00000110651,ENSG00000110880,ENSG00000111679,ENSG00000114353…
17	rna	positive	GO:BP	response to other organism	GO:0051707	0.0031179148693946364	446	516	65	5979	ENSG00000021826,ENSG00000029993,ENSG00000072062,ENSG00000076944,ENSG00000077150,ENSG00000096060,ENSG00000101347,ENSG00000101843,ENSG00000101871,ENSG00000101966,ENSG00000102096,ENSG00000102103,ENSG00000102580,ENSG00000103187,ENSG00000104518,ENSG00000106299,ENSG00000111679,ENSG00000115310,ENSG00000117450,ENSG00000120885,ENSG00000123240,ENSG00000125651,ENSG00000126456,ENSG00000126581,ENSG00000127831…
18	rna	positive	GO:BP	cell migration	GO:0016477	0.0031179148693946364	482	516	69	5979	ENSG00000019582,ENSG00000034152,ENSG00000039523,ENSG00000061273,ENSG00000063660,ENSG00000067113,ENSG00000071127,ENSG00000072786,ENSG00000076706,ENSG00000076716,ENSG00000089159,ENSG00000096717,ENSG00000100092,ENSG00000105221,ENSG00000106299,ENSG00000108821,ENSG00000108830,ENSG00000109062,ENSG00000110651,ENSG00000110880,ENSG00000111679,ENSG00000114353,ENSG00000115310,ENSG00000119888,ENSG00000122694…
19	rna	positive	GO:BP	response to external biotic stimulus	GO:0043207	0.0031179148693946364	446	516	65	5979	ENSG00000021826,ENSG00000029993,ENSG00000072062,ENSG00000076944,ENSG00000077150,ENSG00000096060,ENSG00000101347,ENSG00000101843,ENSG00000101871,ENSG00000101966,ENSG00000102096,ENSG00000102103,ENSG00000102580,ENSG00000103187,ENSG00000104518,ENSG00000106299,ENSG00000111679,ENSG00000115310,ENSG00000117450,ENSG00000120885,ENSG00000123240,ENSG00000125651,ENSG00000126456,ENSG00000126581,ENSG00000127831…
20	rna	positive	GO:BP	signal transduction	GO:0007165	0.0031179148693946364	1863	516	205	5979	ENSG00000005022,ENSG00000007866,ENSG00000014216,ENSG00000019582,ENSG00000034152,ENSG00000038532,ENSG00000039523,ENSG00000048028,ENSG00000058668,ENSG00000061273,ENSG00000063660,ENSG00000067113,ENSG00000067992,ENSG00000069869,ENSG00000070770,ENSG00000071282,ENSG00000072062,ENSG00000072786,ENSG00000075624,ENSG00000076716,ENSG00000077150,ENSG00000078304,ENSG00000082458,ENSG00000088808,ENSG00000089159…
21	rna	positive	GO:BP	response to biotic stimulus	GO:0009607	0.0031930705708720216	456	516	66	5979	ENSG00000021826,ENSG00000029993,ENSG00000072062,ENSG00000072501,ENSG00000076944,ENSG00000077150,ENSG00000096060,ENSG00000101347,ENSG00000101843,ENSG00000101871,ENSG00000101966,ENSG00000102096,ENSG00000102103,ENSG00000102580,ENSG00000103187,ENSG00000104518,ENSG00000106299,ENSG00000111679,ENSG00000115310,ENSG00000117450,ENSG00000120885,ENSG00000123240,ENSG00000125651,ENSG00000126456,ENSG00000126581…
22	rna	positive	GO:BP	protein localization to cell periphery	GO:1990778	0.004239743063235333	170	516	32	5979	ENSG00000024422,ENSG00000068400,ENSG00000075624,ENSG00000076716,ENSG00000092820,ENSG00000095637,ENSG00000101246,ENSG00000103274,ENSG00000105221,ENSG00000109062,ENSG00000110651,ENSG00000123240,ENSG00000124507,ENSG00000127831,ENSG00000130702,ENSG00000130762,ENSG00000132612,ENSG00000133961,ENSG00000143545,ENSG00000157978,ENSG00000161011,ENSG00000161203,ENSG00000165527,ENSG00000166900,ENSG00000170310…
23	rna	positive	GO:BP	anatomical structure morphogenesis	GO:0009653	0.004389386106759541	933	516	115	5979	ENSG00000004961,ENSG00000014216,ENSG00000022267,ENSG00000024422,ENSG00000031698,ENSG00000061273,ENSG00000063660,ENSG00000067225,ENSG00000069869,ENSG00000071127,ENSG00000072062,ENSG00000075624,ENSG00000076706,ENSG00000076716,ENSG00000077150,ENSG00000082458,ENSG00000089159,ENSG00000092820,ENSG00000096717,ENSG00000100092,ENSG00000101160,ENSG00000101246,ENSG00000101843,ENSG00000102098,ENSG00000102103…
24	rna	positive	GO:BP	cell communication	GO:0007154	0.004407794940412975	2023	516	218	5979	ENSG00000005022,ENSG00000007402,ENSG00000007866,ENSG00000014216,ENSG00000019582,ENSG00000034152,ENSG00000038532,ENSG00000039523,ENSG00000048028,ENSG00000058668,ENSG00000061273,ENSG00000063660,ENSG00000067113,ENSG00000067992,ENSG00000068366,ENSG00000069869,ENSG00000070770,ENSG00000071282,ENSG00000072062,ENSG00000072786,ENSG00000075624,ENSG00000076716,ENSG00000077150,ENSG00000078304,ENSG00000082458…
25	rna	positive	GO:BP	regulation of locomotion	GO:0040012	0.004407794940412975	355	516	54	5979	ENSG00000019582,ENSG00000034152,ENSG00000039523,ENSG00000061273,ENSG00000072786,ENSG00000076706,ENSG00000096717,ENSG00000100092,ENSG00000101421,ENSG00000105221,ENSG00000105767,ENSG00000106299,ENSG00000108821,ENSG00000108830,ENSG00000109062,ENSG00000110651,ENSG00000110880,ENSG00000114353,ENSG00000115310,ENSG00000119888,ENSG00000122694,ENSG00000126458,ENSG00000127831,ENSG00000128567,ENSG00000130150…
26	rna	positive	GO:BP	regulation of protein localization to membrane	GO:1905475	0.006675515664117638	100	516	22	5979	ENSG00000063660,ENSG00000068400,ENSG00000075624,ENSG00000076716,ENSG00000088808,ENSG00000092820,ENSG00000095637,ENSG00000105221,ENSG00000110651,ENSG00000127831,ENSG00000130762,ENSG00000132612,ENSG00000133961,ENSG00000147257,ENSG00000157978,ENSG00000161011,ENSG00000161203,ENSG00000165527,ENSG00000166900,ENSG00000170310,ENSG00000171552,ENSG00000177105
27	rna	positive	GO:BP	regulation of protein localization to cell periphery	GO:1904375	0.0075798008288457935	67	516	17	5979	ENSG00000068400,ENSG00000075624,ENSG00000076716,ENSG00000092820,ENSG00000095637,ENSG00000127831,ENSG00000130762,ENSG00000132612,ENSG00000133961,ENSG00000157978,ENSG00000161011,ENSG00000161203,ENSG00000165527,ENSG00000166900,ENSG00000170310,ENSG00000171552,ENSG00000177105
28	rna	positive	GO:BP	response to wounding	GO:0009611	0.00785102745054896	234	516	39	5979	ENSG00000024422,ENSG00000039523,ENSG00000067225,ENSG00000072062,ENSG00000075624,ENSG00000076706,ENSG00000100097,ENSG00000101335,ENSG00000105767,ENSG00000108821,ENSG00000110651,ENSG00000111679,ENSG00000116478,ENSG00000118898,ENSG00000127831,ENSG00000130203,ENSG00000135046,ENSG00000135596,ENSG00000138119,ENSG00000138685,ENSG00000140416,ENSG00000147044,ENSG00000147251,ENSG00000147439,ENSG00000152661…
29	rna	positive	GO:BP	movement of cell or subcellular component	GO:0006928	0.009348584792859216	705	516	90	5979	ENSG00000019582,ENSG00000034152,ENSG00000039523,ENSG00000046651,ENSG00000058668,ENSG00000061273,ENSG00000063660,ENSG00000067113,ENSG00000070718,ENSG00000071127,ENSG00000072786,ENSG00000075624,ENSG00000076706,ENSG00000076716,ENSG00000089159,ENSG00000092820,ENSG00000096717,ENSG00000100092,ENSG00000105221,ENSG00000105767,ENSG00000106299,ENSG00000108821,ENSG00000108830,ENSG00000109062,ENSG00000110651…
30	rna	positive	GO:BP	signaling	GO:0023052	0.009348584792859216	2004	516	214	5979	ENSG00000005022,ENSG00000007402,ENSG00000007866,ENSG00000014216,ENSG00000019582,ENSG00000034152,ENSG00000038532,ENSG00000039523,ENSG00000048028,ENSG00000058668,ENSG00000061273,ENSG00000063660,ENSG00000067113,ENSG00000067992,ENSG00000068366,ENSG00000069869,ENSG00000070770,ENSG00000071282,ENSG00000072062,ENSG00000072786,ENSG00000075624,ENSG00000076716,ENSG00000077150,ENSG00000078304,ENSG00000082458…
31	rna	positive	GO:BP	regulation of cell motility	GO:2000145	0.012163150364200235	326	516	49	5979	ENSG00000019582,ENSG00000034152,ENSG00000039523,ENSG00000061273,ENSG00000072786,ENSG00000076706,ENSG00000096717,ENSG00000100092,ENSG00000105221,ENSG00000105767,ENSG00000106299,ENSG00000108821,ENSG00000108830,ENSG00000109062,ENSG00000110651,ENSG00000110880,ENSG00000114353,ENSG00000115310,ENSG00000119888,ENSG00000122694,ENSG00000126458,ENSG00000127831,ENSG00000128567,ENSG00000130150,ENSG00000130203…
32	rna	positive	GO:BP	system development	GO:0048731	0.013539787903970882	1613	516	177	5979	ENSG00000004961,ENSG00000007866,ENSG00000014216,ENSG00000019582,ENSG00000021826,ENSG00000022267,ENSG00000029993,ENSG00000031698,ENSG00000046653,ENSG00000052344,ENSG00000058668,ENSG00000061273,ENSG00000063660,ENSG00000066629,ENSG00000067225,ENSG00000068323,ENSG00000068366,ENSG00000069869,ENSG00000070770,ENSG00000071127,ENSG00000072062,ENSG00000075624,ENSG00000076706,ENSG00000076716,ENSG00000077150…
33	rna	positive	GO:BP	positive regulation of fatty acid metabolic process	GO:0045923	0.014882702571152628	7	516	5	5979	ENSG00000019582,ENSG00000103150,ENSG00000105221,ENSG00000135046,ENSG00000165175
34	rna	positive	GO:BP	positive regulation of locomotion	GO:0040017	0.01703078819185151	211	516	35	5979	ENSG00000019582,ENSG00000034152,ENSG00000039523,ENSG00000061273,ENSG00000076706,ENSG00000096717,ENSG00000101421,ENSG00000105221,ENSG00000108821,ENSG00000114353,ENSG00000115310,ENSG00000119888,ENSG00000122694,ENSG00000127831,ENSG00000128567,ENSG00000130150,ENSG00000132612,ENSG00000133789,ENSG00000133961,ENSG00000135046,ENSG00000137285,ENSG00000138685,ENSG00000138772,ENSG00000147459,ENSG00000156299…
35	rna	positive	GO:BP	tissue development	GO:0009888	0.01703078819185151	651	516	83	5979	ENSG00000014216,ENSG00000021826,ENSG00000046653,ENSG00000052344,ENSG00000063660,ENSG00000067225,ENSG00000071127,ENSG00000072062,ENSG00000076716,ENSG00000082458,ENSG00000083444,ENSG00000086712,ENSG00000092820,ENSG00000096717,ENSG00000100092,ENSG00000101160,ENSG00000101843,ENSG00000102119,ENSG00000105221,ENSG00000106397,ENSG00000108821,ENSG00000109062,ENSG00000110651,ENSG00000110880,ENSG00000115310…
36	rna	positive	GO:BP	positive regulation of developmental process	GO:0051094	0.01703078819185151	460	516	63	5979	ENSG00000007402,ENSG00000019582,ENSG00000024422,ENSG00000046653,ENSG00000061273,ENSG00000063660,ENSG00000067225,ENSG00000088305,ENSG00000092820,ENSG00000096717,ENSG00000101882,ENSG00000101974,ENSG00000105088,ENSG00000108821,ENSG00000108830,ENSG00000110880,ENSG00000115310,ENSG00000116478,ENSG00000116670,ENSG00000117676,ENSG00000122694,ENSG00000123562,ENSG00000124507,ENSG00000126458,ENSG00000127831…
37	rna	positive	GO:BP	response to bacterium	GO:0009617	0.017190873724499543	131	516	25	5979	ENSG00000021826,ENSG00000077150,ENSG00000096060,ENSG00000104518,ENSG00000106299,ENSG00000123240,ENSG00000126456,ENSG00000127831,ENSG00000130522,ENSG00000131203,ENSG00000138069,ENSG00000138772,ENSG00000147257,ENSG00000151014,ENSG00000152661,ENSG00000162889,ENSG00000163932,ENSG00000170542,ENSG00000175866,ENSG00000176485,ENSG00000177189,ENSG00000187608,ENSG00000187867,ENSG00000196352,ENSG00000198722
38	rna	positive	GO:BP	multicellular organism development	GO:0007275	0.02128756474485602	1804	516	193	5979	ENSG00000004961,ENSG00000007866,ENSG00000014216,ENSG00000019582,ENSG00000021826,ENSG00000022267,ENSG00000029993,ENSG00000031698,ENSG00000046651,ENSG00000046653,ENSG00000052344,ENSG00000058668,ENSG00000061273,ENSG00000063660,ENSG00000066629,ENSG00000067225,ENSG00000068323,ENSG00000068366,ENSG00000069869,ENSG00000070770,ENSG00000071127,ENSG00000072062,ENSG00000075624,ENSG00000076706,ENSG00000076716…
39	rna	positive	GO:BP	response to stimulus	GO:0050896	0.026606147517224843	2999	516	298	5979	ENSG00000005022,ENSG00000007866,ENSG00000014216,ENSG00000019582,ENSG00000021826,ENSG00000024422,ENSG00000029993,ENSG00000034152,ENSG00000038532,ENSG00000039523,ENSG00000048028,ENSG00000058668,ENSG00000061273,ENSG00000063660,ENSG00000065833,ENSG00000067113,ENSG00000067225,ENSG00000067992,ENSG00000068323,ENSG00000068366,ENSG00000069869,ENSG00000070770,ENSG00000071282,ENSG00000072062,ENSG00000072501…
40	rna	positive	GO:BP	regulation of plasma membrane bounded cell projection assembly	GO:0120032	0.027122456096411438	76	516	17	5979	ENSG00000106299,ENSG00000110880,ENSG00000124839,ENSG00000128567,ENSG00000131037,ENSG00000147251,ENSG00000147439,ENSG00000158321,ENSG00000159753,ENSG00000163932,ENSG00000165527,ENSG00000172020,ENSG00000177105,ENSG00000177106,ENSG00000179604,ENSG00000184640,ENSG00000247596
41	rna	positive	GO:BP	regulation of cell migration	GO:0030334	0.027122456096411438	304	516	45	5979	ENSG00000019582,ENSG00000034152,ENSG00000039523,ENSG00000061273,ENSG00000072786,ENSG00000076706,ENSG00000096717,ENSG00000100092,ENSG00000105221,ENSG00000106299,ENSG00000108821,ENSG00000108830,ENSG00000109062,ENSG00000110651,ENSG00000110880,ENSG00000114353,ENSG00000115310,ENSG00000122694,ENSG00000126458,ENSG00000127831,ENSG00000128567,ENSG00000130150,ENSG00000130203,ENSG00000130702,ENSG00000133789…
42	rna	positive	GO:BP	vesicle-mediated transport	GO:0016192	0.027122456096411438	964	516	113	5979	ENSG00000004059,ENSG00000014216,ENSG00000024422,ENSG00000038532,ENSG00000067225,ENSG00000068400,ENSG00000069869,ENSG00000070718,ENSG00000071127,ENSG00000072786,ENSG00000075624,ENSG00000076944,ENSG00000078808,ENSG00000092820,ENSG00000099246,ENSG00000099940,ENSG00000100092,ENSG00000101160,ENSG00000101246,ENSG00000101421,ENSG00000102218,ENSG00000102225,ENSG00000102316,ENSG00000102580,ENSG00000102858…
43	rna	positive	GO:BP	regulation of protein localization	GO:0032880	0.028720342165633905	443	516	60	5979	ENSG00000005022,ENSG00000007402,ENSG00000039523,ENSG00000046653,ENSG00000055483,ENSG00000063660,ENSG00000068366,ENSG00000068400,ENSG00000070770,ENSG00000072062,ENSG00000075624,ENSG00000076716,ENSG00000088808,ENSG00000092820,ENSG00000095637,ENSG00000102119,ENSG00000102225,ENSG00000104518,ENSG00000105221,ENSG00000106299,ENSG00000110651,ENSG00000115310,ENSG00000123595,ENSG00000126391,ENSG00000126456…
44	rna	positive	GO:BP	extracellular structure organization	GO:0043062	0.029697419764581092	106	516	21	5979	ENSG00000014216,ENSG00000046653,ENSG00000072062,ENSG00000077150,ENSG00000083444,ENSG00000106397,ENSG00000108821,ENSG00000123131,ENSG00000126247,ENSG00000130203,ENSG00000130702,ENSG00000135047,ENSG00000135424,ENSG00000136167,ENSG00000136943,ENSG00000138685,ENSG00000157483,ENSG00000159753,ENSG00000161638,ENSG00000182718,ENSG00000185624
45	rna	positive	GO:BP	regulation of cell projection assembly	GO:0060491	0.02972103211508676	77	516	17	5979	ENSG00000106299,ENSG00000110880,ENSG00000124839,ENSG00000128567,ENSG00000131037,ENSG00000147251,ENSG00000147439,ENSG00000158321,ENSG00000159753,ENSG00000163932,ENSG00000165527,ENSG00000172020,ENSG00000177105,ENSG00000177106,ENSG00000179604,ENSG00000184640,ENSG00000247596
46	rna	positive	GO:BP	regulation of viral entry into host cell	GO:0046596	0.02982479275748727	12	516	6	5979	ENSG00000019582,ENSG00000100097,ENSG00000130202,ENSG00000132109,ENSG00000142089,ENSG00000185624
47	rna	positive	GO:BP	positive regulation of viral entry into host cell	GO:0046598	0.03162712188795876	5	516	4	5979	ENSG00000019582,ENSG00000100097,ENSG00000132109,ENSG00000185624
48	rna	positive	GO:BP	immune response	GO:0006955	0.0346823970556136	680	516	84	5979	ENSG00000014216,ENSG00000019582,ENSG00000029993,ENSG00000067225,ENSG00000068323,ENSG00000072062,ENSG00000072786,ENSG00000075624,ENSG00000076944,ENSG00000077150,ENSG00000092820,ENSG00000096717,ENSG00000099246,ENSG00000099940,ENSG00000100097,ENSG00000101160,ENSG00000101347,ENSG00000101843,ENSG00000101871,ENSG00000101966,ENSG00000102103,ENSG00000102580,ENSG00000103187,ENSG00000103381,ENSG00000103415…
49	rna	positive	GO:BP	cell morphogenesis	GO:0000902	0.034791192524219305	420	516	57	5979	ENSG00000063660,ENSG00000069869,ENSG00000071127,ENSG00000075624,ENSG00000089159,ENSG00000092820,ENSG00000102103,ENSG00000102218,ENSG00000106299,ENSG00000106397,ENSG00000108830,ENSG00000109062,ENSG00000110880,ENSG00000111679,ENSG00000115310,ENSG00000120885,ENSG00000124486,ENSG00000124507,ENSG00000124659,ENSG00000125753,ENSG00000125968,ENSG00000127831,ENSG00000130203,ENSG00000130479,ENSG00000130702…
50	rna	positive	GO:BP	regulation of cellular component movement	GO:0051270	0.035679656303481015	356	516	50	5979	ENSG00000019582,ENSG00000034152,ENSG00000039523,ENSG00000061273,ENSG00000072786,ENSG00000076706,ENSG00000096717,ENSG00000100092,ENSG00000105221,ENSG00000105767,ENSG00000106299,ENSG00000108821,ENSG00000108830,ENSG00000109062,ENSG00000110651,ENSG00000110880,ENSG00000114353,ENSG00000115310,ENSG00000119888,ENSG00000122694,ENSG00000126458,ENSG00000127831,ENSG00000128567,ENSG00000130150,ENSG00000130203…
51	rna	positive	GO:BP	regulation of wound healing	GO:0061041	0.035679656303481015	39	516	11	5979	ENSG00000105767,ENSG00000127831,ENSG00000130203,ENSG00000135046,ENSG00000138685,ENSG00000147044,ENSG00000152661,ENSG00000162407,ENSG00000163932,ENSG00000164111,ENSG00000182718
52	rna	positive	GO:BP	cytoskeleton organization	GO:0007010	0.035679656303481015	672	516	83	5979	ENSG00000024422,ENSG00000042493,ENSG00000046653,ENSG00000066629,ENSG00000071127,ENSG00000072501,ENSG00000075624,ENSG00000077274,ENSG00000089159,ENSG00000092820,ENSG00000095637,ENSG00000100092,ENSG00000101421,ENSG00000101871,ENSG00000101972,ENSG00000102024,ENSG00000103187,ENSG00000103274,ENSG00000104833,ENSG00000106299,ENSG00000107438,ENSG00000108830,ENSG00000109062,ENSG00000110880,ENSG00000116670…
53	rna	positive	GO:BP	cellular component morphogenesis	GO:0032989	0.03671074487004442	460	516	61	5979	ENSG00000063660,ENSG00000069869,ENSG00000071127,ENSG00000075624,ENSG00000089159,ENSG00000092820,ENSG00000102103,ENSG00000102218,ENSG00000106299,ENSG00000106397,ENSG00000108830,ENSG00000109062,ENSG00000110880,ENSG00000111679,ENSG00000115310,ENSG00000120885,ENSG00000124486,ENSG00000124507,ENSG00000124659,ENSG00000125753,ENSG00000125968,ENSG00000127831,ENSG00000130202,ENSG00000130203,ENSG00000130479…
54	rna	positive	GO:BP	regulation of multicellular organismal process	GO:0051239	0.03671074487004442	1039	516	119	5979	ENSG00000007402,ENSG00000019582,ENSG00000029993,ENSG00000031698,ENSG00000034152,ENSG00000046653,ENSG00000058668,ENSG00000061273,ENSG00000063660,ENSG00000067225,ENSG00000068323,ENSG00000069869,ENSG00000071127,ENSG00000071282,ENSG00000072062,ENSG00000076716,ENSG00000077150,ENSG00000086712,ENSG00000088305,ENSG00000092820,ENSG00000096717,ENSG00000100092,ENSG00000100097,ENSG00000101160,ENSG00000101335…
55	rna	positive	GO:BP	regulation of ion transport	GO:0043269	0.03734418010687717	165	516	28	5979	ENSG00000007402,ENSG00000014216,ENSG00000022267,ENSG00000046653,ENSG00000052344,ENSG00000058668,ENSG00000069869,ENSG00000071127,ENSG00000072062,ENSG00000082458,ENSG00000105221,ENSG00000109062,ENSG00000111679,ENSG00000114353,ENSG00000121769,ENSG00000124942,ENSG00000126803,ENSG00000130203,ENSG00000147044,ENSG00000152661,ENSG00000163932,ENSG00000165912,ENSG00000166710,ENSG00000167323,ENSG00000173163…
56	rna	positive	GO:BP	cell adhesion	GO:0007155	0.040086449674999115	415	516	56	5979	ENSG00000019582,ENSG00000046653,ENSG00000068323,ENSG00000072786,ENSG00000075624,ENSG00000076706,ENSG00000076716,ENSG00000082458,ENSG00000089159,ENSG00000092820,ENSG00000095637,ENSG00000100097,ENSG00000101335,ENSG00000101882,ENSG00000105767,ENSG00000107438,ENSG00000108821,ENSG00000110651,ENSG00000110880,ENSG00000111679,ENSG00000116670,ENSG00000119888,ENSG00000125968,ENSG00000128567,ENSG00000130202…
57	rna	positive	GO:BP	positive regulation of biological process	GO:0048518	0.04121187801999078	2315	516	236	5979	ENSG00000005022,ENSG00000007402,ENSG00000007866,ENSG00000014216,ENSG00000019582,ENSG00000022267,ENSG00000024422,ENSG00000029993,ENSG00000034152,ENSG00000038532,ENSG00000039523,ENSG00000046653,ENSG00000052344,ENSG00000055483,ENSG00000058668,ENSG00000061273,ENSG00000063660,ENSG00000067225,ENSG00000068323,ENSG00000068366,ENSG00000069869,ENSG00000070770,ENSG00000071127,ENSG00000071282,ENSG00000072062…
58	rna	positive	GO:BP	biological adhesion	GO:0022610	0.0438071764221325	417	516	56	5979	ENSG00000019582,ENSG00000046653,ENSG00000068323,ENSG00000072786,ENSG00000075624,ENSG00000076706,ENSG00000076716,ENSG00000082458,ENSG00000089159,ENSG00000092820,ENSG00000095637,ENSG00000100097,ENSG00000101335,ENSG00000101882,ENSG00000105767,ENSG00000107438,ENSG00000108821,ENSG00000110651,ENSG00000110880,ENSG00000111679,ENSG00000116670,ENSG00000119888,ENSG00000125968,ENSG00000128567,ENSG00000130202…
59	rna	positive	GO:BP	defense response to other organism	GO:0098542	0.04405830995643113	343	516	48	5979	ENSG00000029993,ENSG00000072062,ENSG00000076944,ENSG00000101347,ENSG00000101843,ENSG00000101871,ENSG00000101966,ENSG00000102103,ENSG00000102580,ENSG00000103187,ENSG00000104518,ENSG00000111679,ENSG00000115310,ENSG00000117450,ENSG00000120885,ENSG00000123240,ENSG00000126456,ENSG00000126581,ENSG00000130202,ENSG00000130203,ENSG00000132109,ENSG00000135046,ENSG00000135047,ENSG00000135148,ENSG00000136068…
60	rna	positive	GO:BP	positive regulation of lipid metabolic process	GO:0045834	0.04600457219019116	47	516	12	5979	ENSG00000019582,ENSG00000095637,ENSG00000103150,ENSG00000105221,ENSG00000110651,ENSG00000121769,ENSG00000130203,ENSG00000135046,ENSG00000138685,ENSG00000157978,ENSG00000163932,ENSG00000165175
61	rna	positive	GO:BP	plasma membrane organization	GO:0007009	0.04826994274967576	41	516	11	5979	ENSG00000024422,ENSG00000105221,ENSG00000106299,ENSG00000120885,ENSG00000124507,ENSG00000130703,ENSG00000138119,ENSG00000147439,ENSG00000163932,ENSG00000165912,ENSG00000175866
62	rna	positive	GO:BP	monocarboxylic acid transport	GO:0015718	0.04826994274967576	41	516	11	5979	ENSG00000068366,ENSG00000105221,ENSG00000109062,ENSG00000121769,ENSG00000130203,ENSG00000135046,ENSG00000135241,ENSG00000143554,ENSG00000147872,ENSG00000155380,ENSG00000165175
63	rna	positive	GO:BP	cell morphogenesis involved in differentiation	GO:0000904	0.048957944269486436	300	516	43	5979	ENSG00000063660,ENSG00000069869,ENSG00000071127,ENSG00000075624,ENSG00000089159,ENSG00000092820,ENSG00000102103,ENSG00000106299,ENSG00000106397,ENSG00000108830,ENSG00000109062,ENSG00000110880,ENSG00000111679,ENSG00000115310,ENSG00000124486,ENSG00000125753,ENSG00000125968,ENSG00000130203,ENSG00000130479,ENSG00000130702,ENSG00000133083,ENSG00000133961,ENSG00000136068,ENSG00000137285,ENSG00000138069…
64	rna	positive	GO:BP	positive regulation of cellular component movement	GO:0051272	0.048957944269486436	203	516	32	5979	ENSG00000019582,ENSG00000034152,ENSG00000039523,ENSG00000061273,ENSG00000076706,ENSG00000096717,ENSG00000105221,ENSG00000108821,ENSG00000114353,ENSG00000115310,ENSG00000119888,ENSG00000122694,ENSG00000127831,ENSG00000128567,ENSG00000130150,ENSG00000133789,ENSG00000133961,ENSG00000135046,ENSG00000137285,ENSG00000138685,ENSG00000138772,ENSG00000147459,ENSG00000156299,ENSG00000159753,ENSG00000161638…
65	rna	positive	TF	Factor: ZNF692; motif: SYNGGSCCCASCCNC	TF:M09734	4.0569200266951664e-07	4087	531	410	6295	ENSG00000003509,ENSG00000004059,ENSG00000004961,ENSG00000005022,ENSG00000005302,ENSG00000006757,ENSG00000007402,ENSG00000007866,ENSG00000014216,ENSG00000022267,ENSG00000024422,ENSG00000029993,ENSG00000031698,ENSG00000034152,ENSG00000039523,ENSG00000042493,ENSG00000044446,ENSG00000046647,ENSG00000046651,ENSG00000046653,ENSG00000047230,ENSG00000048028,ENSG00000052344,ENSG00000055483,ENSG00000056277…
66	rna	positive	TF	Factor: ZNF692; motif: SYNGGSCCCASCCNC; match class: 0	TF:M09734_0	4.0569200266951664e-07	4087	531	410	6295	ENSG00000003509,ENSG00000004059,ENSG00000004961,ENSG00000005022,ENSG00000005302,ENSG00000006757,ENSG00000007402,ENSG00000007866,ENSG00000014216,ENSG00000022267,ENSG00000024422,ENSG00000029993,ENSG00000031698,ENSG00000034152,ENSG00000039523,ENSG00000042493,ENSG00000044446,ENSG00000046647,ENSG00000046651,ENSG00000046653,ENSG00000047230,ENSG00000048028,ENSG00000052344,ENSG00000055483,ENSG00000056277…
67	rna	positive	TF	Factor: GKLF; motif: NNNRGGNGNGGSN; match class: 1	TF:M07289_1	1.1374260126254576e-06	3715	531	379	6295	ENSG00000004961,ENSG00000005302,ENSG00000006757,ENSG00000007402,ENSG00000007866,ENSG00000014216,ENSG00000018610,ENSG00000022267,ENSG00000024422,ENSG00000031698,ENSG00000034152,ENSG00000039523,ENSG00000042493,ENSG00000044446,ENSG00000046647,ENSG00000046653,ENSG00000048028,ENSG00000055483,ENSG00000056277,ENSG00000056998,ENSG00000058668,ENSG00000061273,ENSG00000063241,ENSG00000063601,ENSG00000063660…
68	rna	positive	TF	Factor: ZNF692; motif: SYNGGSCCCASCCNC; match class: 1	TF:M09734_1	1.3537052470494012e-06	2124	531	244	6295	ENSG00000007402,ENSG00000007866,ENSG00000014216,ENSG00000024422,ENSG00000029993,ENSG00000031698,ENSG00000034152,ENSG00000039523,ENSG00000042493,ENSG00000056998,ENSG00000061273,ENSG00000063241,ENSG00000063601,ENSG00000063660,ENSG00000066629,ENSG00000067225,ENSG00000067992,ENSG00000068366,ENSG00000071859,ENSG00000072062,ENSG00000072682,ENSG00000072786,ENSG00000075624,ENSG00000076716,ENSG00000076944…
69	rna	positive	TF	Factor: KLF; motif: GGGNGGGG; match class: 0	TF:M07461_0	6.934770636814861e-06	2895	531	307	6295	ENSG00000004059,ENSG00000005022,ENSG00000006757,ENSG00000007402,ENSG00000007866,ENSG00000014216,ENSG00000019582,ENSG00000024422,ENSG00000029993,ENSG00000031698,ENSG00000034152,ENSG00000039523,ENSG00000046653,ENSG00000052344,ENSG00000058668,ENSG00000061273,ENSG00000063241,ENSG00000063601,ENSG00000063660,ENSG00000067113,ENSG00000067225,ENSG00000067992,ENSG00000068366,ENSG00000068394,ENSG00000068400…
70	rna	positive	TF	Factor: KLF; motif: GGGNGGGG	TF:M07461	6.934770636814861e-06	2895	531	307	6295	ENSG00000004059,ENSG00000005022,ENSG00000006757,ENSG00000007402,ENSG00000007866,ENSG00000014216,ENSG00000019582,ENSG00000024422,ENSG00000029993,ENSG00000031698,ENSG00000034152,ENSG00000039523,ENSG00000046653,ENSG00000052344,ENSG00000058668,ENSG00000061273,ENSG00000063241,ENSG00000063601,ENSG00000063660,ENSG00000067113,ENSG00000067225,ENSG00000067992,ENSG00000068366,ENSG00000068394,ENSG00000068400…
71	rna	positive	TF	Factor: GLI; motif: NGACCMCCCAN	TF:M07290	6.934770636814861e-06	2294	531	255	6295	ENSG00000003509,ENSG00000005302,ENSG00000006757,ENSG00000007402,ENSG00000007866,ENSG00000014216,ENSG00000024422,ENSG00000031698,ENSG00000038532,ENSG00000039523,ENSG00000046647,ENSG00000046653,ENSG00000047230,ENSG00000052344,ENSG00000056998,ENSG00000058668,ENSG00000061273,ENSG00000063241,ENSG00000063601,ENSG00000063660,ENSG00000065833,ENSG00000067992,ENSG00000068323,ENSG00000068366,ENSG00000068400…
72	rna	positive	TF	Factor: GLI; motif: NGACCMCCCAN; match class: 0	TF:M07290_0	6.934770636814861e-06	2294	531	255	6295	ENSG00000003509,ENSG00000005302,ENSG00000006757,ENSG00000007402,ENSG00000007866,ENSG00000014216,ENSG00000024422,ENSG00000031698,ENSG00000038532,ENSG00000039523,ENSG00000046647,ENSG00000046653,ENSG00000047230,ENSG00000052344,ENSG00000056998,ENSG00000058668,ENSG00000061273,ENSG00000063241,ENSG00000063601,ENSG00000063660,ENSG00000065833,ENSG00000067992,ENSG00000068323,ENSG00000068366,ENSG00000068400…
73	rna	positive	TF	Factor: MAZ; motif: GGGMGGGGSSGGGGGGGGGGGG; match class: 1	TF:M09636_1	2.1954939788237618e-05	5223	531	483	6295	ENSG00000004059,ENSG00000004961,ENSG00000005022,ENSG00000005302,ENSG00000007402,ENSG00000007866,ENSG00000014216,ENSG00000018610,ENSG00000022267,ENSG00000024422,ENSG00000029993,ENSG00000031698,ENSG00000034152,ENSG00000038532,ENSG00000039523,ENSG00000042493,ENSG00000044446,ENSG00000046647,ENSG00000046651,ENSG00000047230,ENSG00000048028,ENSG00000052344,ENSG00000055483,ENSG00000056277,ENSG00000056998…
74	rna	positive	TF	Factor: PUR1; motif: GGGNCAGNN	TF:M01721	2.1954939788237618e-05	3003	531	313	6295	ENSG00000004059,ENSG00000005022,ENSG00000007402,ENSG00000014216,ENSG00000019582,ENSG00000024422,ENSG00000038532,ENSG00000039523,ENSG00000044446,ENSG00000046651,ENSG00000047230,ENSG00000052344,ENSG00000058668,ENSG00000061273,ENSG00000063660,ENSG00000065833,ENSG00000066629,ENSG00000067113,ENSG00000067992,ENSG00000068323,ENSG00000068394,ENSG00000070770,ENSG00000071127,ENSG00000071859,ENSG00000072506…
75	rna	positive	TF	Factor: AP-2alpha; motif: NNNGSCCTGRGGSN; match class: 0	TF:M04896_0	2.1954939788237618e-05	1895	531	216	6295	ENSG00000004961,ENSG00000005302,ENSG00000006757,ENSG00000007866,ENSG00000014216,ENSG00000019582,ENSG00000029993,ENSG00000031698,ENSG00000039523,ENSG00000044446,ENSG00000047230,ENSG00000048028,ENSG00000052344,ENSG00000055483,ENSG00000063241,ENSG00000065833,ENSG00000067992,ENSG00000068394,ENSG00000070718,ENSG00000070770,ENSG00000071859,ENSG00000072501,ENSG00000072682,ENSG00000072786,ENSG00000075624…
76	rna	positive	TF	Factor: AP-2alpha; motif: NNNGSCCTGRGGSN	TF:M04896	2.1954939788237618e-05	1895	531	216	6295	ENSG00000004961,ENSG00000005302,ENSG00000006757,ENSG00000007866,ENSG00000014216,ENSG00000019582,ENSG00000029993,ENSG00000031698,ENSG00000039523,ENSG00000044446,ENSG00000047230,ENSG00000048028,ENSG00000052344,ENSG00000055483,ENSG00000063241,ENSG00000065833,ENSG00000067992,ENSG00000068394,ENSG00000070718,ENSG00000070770,ENSG00000071859,ENSG00000072501,ENSG00000072682,ENSG00000072786,ENSG00000075624…
77	rna	positive	TF	Factor: PUR1; motif: GGGNCAGNN; match class: 0	TF:M01721_0	2.1954939788237618e-05	3003	531	313	6295	ENSG00000004059,ENSG00000005022,ENSG00000007402,ENSG00000014216,ENSG00000019582,ENSG00000024422,ENSG00000038532,ENSG00000039523,ENSG00000044446,ENSG00000046651,ENSG00000047230,ENSG00000052344,ENSG00000058668,ENSG00000061273,ENSG00000063660,ENSG00000065833,ENSG00000066629,ENSG00000067113,ENSG00000067992,ENSG00000068323,ENSG00000068394,ENSG00000070770,ENSG00000071127,ENSG00000071859,ENSG00000072506…
78	rna	positive	TF	Factor: EGR1; motif: NCNCCGCCCCCGCN	TF:M07208	2.3012468102685448e-05	2425	531	263	6295	ENSG00000004059,ENSG00000005022,ENSG00000005302,ENSG00000006757,ENSG00000007402,ENSG00000007866,ENSG00000022267,ENSG00000029993,ENSG00000031698,ENSG00000044446,ENSG00000048028,ENSG00000056277,ENSG00000061273,ENSG00000063241,ENSG00000063601,ENSG00000063660,ENSG00000065833,ENSG00000067992,ENSG00000068366,ENSG00000068394,ENSG00000068400,ENSG00000069869,ENSG00000070718,ENSG00000070770,ENSG00000071127…
79	rna	positive	TF	Factor: EGR1; motif: NCNCCGCCCCCGCN; match class: 0	TF:M07208_0	2.3012468102685448e-05	2425	531	263	6295	ENSG00000004059,ENSG00000005022,ENSG00000005302,ENSG00000006757,ENSG00000007402,ENSG00000007866,ENSG00000022267,ENSG00000029993,ENSG00000031698,ENSG00000044446,ENSG00000048028,ENSG00000056277,ENSG00000061273,ENSG00000063241,ENSG00000063601,ENSG00000063660,ENSG00000065833,ENSG00000067992,ENSG00000068366,ENSG00000068394,ENSG00000068400,ENSG00000069869,ENSG00000070718,ENSG00000070770,ENSG00000071127…
80	rna	positive	TF	Factor: GKLF; motif: NNRRGRRNGNSNNN; match class: 1	TF:M07040_1	3.3814161716651726e-05	2806	531	295	6295	ENSG00000005022,ENSG00000005302,ENSG00000007402,ENSG00000007866,ENSG00000014216,ENSG00000022267,ENSG00000024422,ENSG00000029993,ENSG00000031698,ENSG00000034152,ENSG00000039523,ENSG00000042493,ENSG00000047230,ENSG00000052344,ENSG00000055483,ENSG00000056277,ENSG00000056998,ENSG00000058668,ENSG00000061273,ENSG00000063241,ENSG00000063601,ENSG00000063660,ENSG00000067225,ENSG00000067992,ENSG00000068323…
81	rna	positive	TF	Factor: GKLF; motif: GCCMCRCCCNNN; match class: 1	TF:M01588_1	3.431972497054583e-05	1671	531	194	6295	ENSG00000004059,ENSG00000007866,ENSG00000022267,ENSG00000024422,ENSG00000029993,ENSG00000034152,ENSG00000039523,ENSG00000042493,ENSG00000044446,ENSG00000048028,ENSG00000061273,ENSG00000063241,ENSG00000063660,ENSG00000067113,ENSG00000070718,ENSG00000070770,ENSG00000071127,ENSG00000071859,ENSG00000072062,ENSG00000075624,ENSG00000076944,ENSG00000077150,ENSG00000077454,ENSG00000077721,ENSG00000088808…
82	rna	positive	TF	Factor: KROX; motif: CCCGCCCCCRCCCC; match class: 1	TF:M00982_1	5.999228048520927e-05	1449	531	172	6295	ENSG00000004059,ENSG00000005022,ENSG00000005302,ENSG00000007402,ENSG00000007866,ENSG00000044446,ENSG00000048028,ENSG00000056998,ENSG00000061273,ENSG00000063601,ENSG00000063660,ENSG00000066629,ENSG00000068366,ENSG00000069869,ENSG00000070718,ENSG00000070770,ENSG00000071127,ENSG00000072062,ENSG00000072506,ENSG00000072682,ENSG00000072786,ENSG00000075624,ENSG00000076944,ENSG00000088305,ENSG00000088808…
83	rna	positive	TF	Factor: Egr-1; motif: GCGGGGGCGG; match class: 1	TF:M07354_1	7.51494895973915e-05	1476	531	174	6295	ENSG00000004059,ENSG00000005022,ENSG00000005302,ENSG00000007402,ENSG00000007866,ENSG00000029993,ENSG00000044446,ENSG00000047230,ENSG00000048028,ENSG00000063241,ENSG00000063601,ENSG00000063660,ENSG00000066629,ENSG00000068323,ENSG00000068366,ENSG00000068400,ENSG00000069869,ENSG00000070718,ENSG00000071127,ENSG00000072062,ENSG00000072682,ENSG00000072786,ENSG00000076944,ENSG00000078808,ENSG00000083444…
84	rna	positive	TF	Factor: SP1; motif: GGGGYGGGGNS	TF:M01303	7.51494895973915e-05	3057	531	314	6295	ENSG00000004059,ENSG00000005022,ENSG00000005302,ENSG00000007402,ENSG00000007866,ENSG00000014216,ENSG00000019582,ENSG00000022267,ENSG00000029993,ENSG00000034152,ENSG00000039523,ENSG00000042493,ENSG00000044446,ENSG00000048028,ENSG00000055483,ENSG00000056277,ENSG00000056998,ENSG00000061273,ENSG00000063241,ENSG00000063601,ENSG00000063660,ENSG00000066629,ENSG00000067113,ENSG00000067225,ENSG00000067992…
85	rna	positive	TF	Factor: SP1; motif: GGGGYGGGGNS; match class: 0	TF:M01303_0	7.51494895973915e-05	3057	531	314	6295	ENSG00000004059,ENSG00000005022,ENSG00000005302,ENSG00000007402,ENSG00000007866,ENSG00000014216,ENSG00000019582,ENSG00000022267,ENSG00000029993,ENSG00000034152,ENSG00000039523,ENSG00000042493,ENSG00000044446,ENSG00000048028,ENSG00000055483,ENSG00000056277,ENSG00000056998,ENSG00000061273,ENSG00000063241,ENSG00000063601,ENSG00000063660,ENSG00000066629,ENSG00000067113,ENSG00000067225,ENSG00000067992…
86	rna	positive	TF	Factor: Sp1; motif: GGNDGGRGGCGGGG; match class: 1	TF:M04953_1	8.568409283970278e-05	1621	531	187	6295	ENSG00000004059,ENSG00000005302,ENSG00000007866,ENSG00000029993,ENSG00000031698,ENSG00000048028,ENSG00000056277,ENSG00000056998,ENSG00000058668,ENSG00000061273,ENSG00000063241,ENSG00000063660,ENSG00000066629,ENSG00000068323,ENSG00000068400,ENSG00000070770,ENSG00000071127,ENSG00000072062,ENSG00000072501,ENSG00000072786,ENSG00000075624,ENSG00000076706,ENSG00000077150,ENSG00000077454,ENSG00000077721…
87	rna	positive	TF	Factor: KLF; motif: GGGNGGGG; match class: 1	TF:M07461_1	8.568409283970278e-05	1087	531	136	6295	ENSG00000007402,ENSG00000007866,ENSG00000014216,ENSG00000024422,ENSG00000031698,ENSG00000034152,ENSG00000039523,ENSG00000061273,ENSG00000063601,ENSG00000063660,ENSG00000067225,ENSG00000067992,ENSG00000072786,ENSG00000075624,ENSG00000076706,ENSG00000077454,ENSG00000077721,ENSG00000082458,ENSG00000088305,ENSG00000089159,ENSG00000096060,ENSG00000100092,ENSG00000100097,ENSG00000101160,ENSG00000101335…
88	rna	positive	TF	Factor: SALL2; motif: GGGTGGG; match class: 1	TF:M04595_1	0.00011186195281192375	2417	531	258	6295	ENSG00000007402,ENSG00000007866,ENSG00000014216,ENSG00000024422,ENSG00000031698,ENSG00000034152,ENSG00000038532,ENSG00000039523,ENSG00000042493,ENSG00000061273,ENSG00000063241,ENSG00000063601,ENSG00000063660,ENSG00000067113,ENSG00000067225,ENSG00000067992,ENSG00000068366,ENSG00000068400,ENSG00000070718,ENSG00000070770,ENSG00000071127,ENSG00000071282,ENSG00000072501,ENSG00000072682,ENSG00000072786…
89	rna	positive	TF	Factor: WT1; motif: CGCCCCCNCN; match class: 1	TF:M02036_1	0.00011186195281192375	2145	531	234	6295	ENSG00000004059,ENSG00000005022,ENSG00000005302,ENSG00000007402,ENSG00000007866,ENSG00000022267,ENSG00000029993,ENSG00000042493,ENSG00000044446,ENSG00000048028,ENSG00000056998,ENSG00000061273,ENSG00000063241,ENSG00000063601,ENSG00000063660,ENSG00000066629,ENSG00000067113,ENSG00000068366,ENSG00000068400,ENSG00000069869,ENSG00000070718,ENSG00000070770,ENSG00000071127,ENSG00000072062,ENSG00000072682…
90	rna	positive	TF	Factor: WT1; motif: NNGGGNGGGSGN	TF:M07436	0.00012804269188595847	2229	531	241	6295	ENSG00000005302,ENSG00000006757,ENSG00000007402,ENSG00000007866,ENSG00000022267,ENSG00000029993,ENSG00000031698,ENSG00000034152,ENSG00000038532,ENSG00000039523,ENSG00000042493,ENSG00000046653,ENSG00000048028,ENSG00000056277,ENSG00000056998,ENSG00000061273,ENSG00000063601,ENSG00000067113,ENSG00000067225,ENSG00000068323,ENSG00000068366,ENSG00000068394,ENSG00000068400,ENSG00000071127,ENSG00000071282…
91	rna	positive	TF	Factor: WT1; motif: NNGGGNGGGSGN; match class: 0	TF:M07436_0	0.00012804269188595847	2229	531	241	6295	ENSG00000005302,ENSG00000006757,ENSG00000007402,ENSG00000007866,ENSG00000022267,ENSG00000029993,ENSG00000031698,ENSG00000034152,ENSG00000038532,ENSG00000039523,ENSG00000042493,ENSG00000046653,ENSG00000048028,ENSG00000056277,ENSG00000056998,ENSG00000061273,ENSG00000063601,ENSG00000067113,ENSG00000067225,ENSG00000068323,ENSG00000068366,ENSG00000068394,ENSG00000068400,ENSG00000071127,ENSG00000071282…
92	rna	positive	TF	Factor: SREBP-1; motif: CACSCCA; match class: 1	TF:M00749_1	0.0001663570008822102	745	531	100	6295	ENSG00000014216,ENSG00000034152,ENSG00000044446,ENSG00000052344,ENSG00000063601,ENSG00000068400,ENSG00000071282,ENSG00000075624,ENSG00000077274,ENSG00000077721,ENSG00000082458,ENSG00000086712,ENSG00000088305,ENSG00000095637,ENSG00000096060,ENSG00000100097,ENSG00000101246,ENSG00000101335,ENSG00000101850,ENSG00000101972,ENSG00000102096,ENSG00000102103,ENSG00000104093,ENSG00000104714,ENSG00000105767…
93	rna	positive	TF	Factor: GKLF; motif: NNRRGRRNGNSNNN	TF:M07040	0.00018795113903818358	4351	531	415	6295	ENSG00000004059,ENSG00000005022,ENSG00000005302,ENSG00000006757,ENSG00000007402,ENSG00000007866,ENSG00000014216,ENSG00000018610,ENSG00000022267,ENSG00000024422,ENSG00000029993,ENSG00000031698,ENSG00000034152,ENSG00000039523,ENSG00000042493,ENSG00000044446,ENSG00000046647,ENSG00000046651,ENSG00000046653,ENSG00000047230,ENSG00000048028,ENSG00000052344,ENSG00000055483,ENSG00000056277,ENSG00000056998…
94	rna	positive	TF	Factor: JUNB:FOSB; motif: NRTGASTCAT; match class: 1	TF:M08920_1	0.00018795113903818358	414	531	64	6295	ENSG00000022267,ENSG00000039523,ENSG00000061273,ENSG00000067225,ENSG00000068323,ENSG00000068366,ENSG00000068394,ENSG00000077150,ENSG00000096080,ENSG00000101935,ENSG00000101966,ENSG00000103187,ENSG00000105767,ENSG00000106397,ENSG00000108821,ENSG00000111275,ENSG00000117676,ENSG00000117877,ENSG00000119888,ENSG00000120549,ENSG00000120885,ENSG00000123130,ENSG00000124839,ENSG00000125827,ENSG00000125970…
95	rna	positive	TF	Factor: ZBP89; motif: CCCCKCCCCCNN; match class: 0	TF:M07397_0	0.00018795113903818358	2750	531	285	6295	ENSG00000004059,ENSG00000005302,ENSG00000007402,ENSG00000007866,ENSG00000014216,ENSG00000029993,ENSG00000031698,ENSG00000039523,ENSG00000042493,ENSG00000044446,ENSG00000048028,ENSG00000056277,ENSG00000056998,ENSG00000061273,ENSG00000063241,ENSG00000063601,ENSG00000063660,ENSG00000067225,ENSG00000067992,ENSG00000068323,ENSG00000068400,ENSG00000070718,ENSG00000071127,ENSG00000071282,ENSG00000072062…
96	rna	positive	TF	Factor: PLAG1; motif: CCCCCKWNNNGGSCCC; match class: 1	TF:M01973_1	0.00018795113903818358	895	531	115	6295	ENSG00000004059,ENSG00000005302,ENSG00000006757,ENSG00000007866,ENSG00000014216,ENSG00000044446,ENSG00000055483,ENSG00000058668,ENSG00000061273,ENSG00000063601,ENSG00000063660,ENSG00000071282,ENSG00000072062,ENSG00000072682,ENSG00000075624,ENSG00000076706,ENSG00000077150,ENSG00000077454,ENSG00000086712,ENSG00000089159,ENSG00000092148,ENSG00000092820,ENSG00000100092,ENSG00000101160,ENSG00000101335…
97	rna	positive	TF	Factor: ZBP89; motif: CCCCKCCCCCNN	TF:M07397	0.00018795113903818358	2750	531	285	6295	ENSG00000004059,ENSG00000005302,ENSG00000007402,ENSG00000007866,ENSG00000014216,ENSG00000029993,ENSG00000031698,ENSG00000039523,ENSG00000042493,ENSG00000044446,ENSG00000048028,ENSG00000056277,ENSG00000056998,ENSG00000061273,ENSG00000063241,ENSG00000063601,ENSG00000063660,ENSG00000067225,ENSG00000067992,ENSG00000068323,ENSG00000068400,ENSG00000070718,ENSG00000071127,ENSG00000071282,ENSG00000072062…
98	rna	positive	TF	Factor: GKLF; motif: NNRRGRRNGNSNNN; match class: 0	TF:M07040_0	0.00018795113903818358	4351	531	415	6295	ENSG00000004059,ENSG00000005022,ENSG00000005302,ENSG00000006757,ENSG00000007402,ENSG00000007866,ENSG00000014216,ENSG00000018610,ENSG00000022267,ENSG00000024422,ENSG00000029993,ENSG00000031698,ENSG00000034152,ENSG00000039523,ENSG00000042493,ENSG00000044446,ENSG00000046647,ENSG00000046651,ENSG00000046653,ENSG00000047230,ENSG00000048028,ENSG00000052344,ENSG00000055483,ENSG00000056277,ENSG00000056998…
99	rna	positive	TF	Factor: JUNB:FOSB; motif: NRTGASTCAT; match class: 0	TF:M08920_0	0.00019843719162272388	919	531	117	6295	ENSG00000022267,ENSG00000039523,ENSG00000061273,ENSG00000065833,ENSG00000067225,ENSG00000068323,ENSG00000068366,ENSG00000068394,ENSG00000072786,ENSG00000076043,ENSG00000077150,ENSG00000077274,ENSG00000087842,ENSG00000096080,ENSG00000101421,ENSG00000101868,ENSG00000101935,ENSG00000101966,ENSG00000102054,ENSG00000102230,ENSG00000102271,ENSG00000102858,ENSG00000103187,ENSG00000105767,ENSG00000106397…
100	rna	positive	TF	Factor: JUNB:FOSB; motif: NRTGASTCAT	TF:M08920	0.00019843719162272388	919	531	117	6295	ENSG00000022267,ENSG00000039523,ENSG00000061273,ENSG00000065833,ENSG00000067225,ENSG00000068323,ENSG00000068366,ENSG00000068394,ENSG00000072786,ENSG00000076043,ENSG00000077150,ENSG00000077274,ENSG00000087842,ENSG00000096080,ENSG00000101421,ENSG00000101868,ENSG00000101935,ENSG00000101966,ENSG00000102054,ENSG00000102230,ENSG00000102271,ENSG00000102858,ENSG00000103187,ENSG00000105767,ENSG00000106397…
101	rna	positive	TF	Factor: Sp2; motif: GGSNNGGGGGCGGGGCCNGNGS; match class: 1	TF:M09658_1	0.00020319481563915804	890	531	114	6295	ENSG00000004059,ENSG00000005022,ENSG00000005302,ENSG00000007866,ENSG00000029993,ENSG00000044446,ENSG00000048028,ENSG00000063601,ENSG00000063660,ENSG00000070770,ENSG00000072786,ENSG00000075624,ENSG00000076706,ENSG00000077150,ENSG00000077721,ENSG00000086712,ENSG00000088305,ENSG00000088808,ENSG00000089159,ENSG00000095380,ENSG00000101335,ENSG00000102054,ENSG00000102119,ENSG00000102221,ENSG00000102226…
102	rna	positive	TF	Factor: c-Fos; motif: RTGASTCAY; match class: 0	TF:M04693_0	0.00021562305030217106	736	531	98	6295	ENSG00000021826,ENSG00000022267,ENSG00000039523,ENSG00000061273,ENSG00000065833,ENSG00000067225,ENSG00000068323,ENSG00000068366,ENSG00000068394,ENSG00000076043,ENSG00000077150,ENSG00000077274,ENSG00000096080,ENSG00000101421,ENSG00000101868,ENSG00000101935,ENSG00000101966,ENSG00000102054,ENSG00000102271,ENSG00000103187,ENSG00000105767,ENSG00000106397,ENSG00000107130,ENSG00000107372,ENSG00000108821…
103	rna	positive	TF	Factor: c-Fos; motif: RTGASTCAY	TF:M04693	0.00021562305030217106	736	531	98	6295	ENSG00000021826,ENSG00000022267,ENSG00000039523,ENSG00000061273,ENSG00000065833,ENSG00000067225,ENSG00000068323,ENSG00000068366,ENSG00000068394,ENSG00000076043,ENSG00000077150,ENSG00000077274,ENSG00000096080,ENSG00000101421,ENSG00000101868,ENSG00000101935,ENSG00000101966,ENSG00000102054,ENSG00000102271,ENSG00000103187,ENSG00000105767,ENSG00000106397,ENSG00000107130,ENSG00000107372,ENSG00000108821…
104	rna	positive	TF	Factor: CACCC-binding; motif: CANCCNNWGGGTGDGG	TF:M00721	0.00021562305030217106	984	531	123	6295	ENSG00000006757,ENSG00000007402,ENSG00000014216,ENSG00000039523,ENSG00000042493,ENSG00000047230,ENSG00000052344,ENSG00000055483,ENSG00000065833,ENSG00000067113,ENSG00000067225,ENSG00000068394,ENSG00000070770,ENSG00000071859,ENSG00000072682,ENSG00000072786,ENSG00000075624,ENSG00000076706,ENSG00000077274,ENSG00000077454,ENSG00000083444,ENSG00000092820,ENSG00000096060,ENSG00000100092,ENSG00000100097…
105	rna	positive	TF	Factor: CACCC-binding; motif: CANCCNNWGGGTGDGG; match class: 0	TF:M00721_0	0.00021562305030217106	984	531	123	6295	ENSG00000006757,ENSG00000007402,ENSG00000014216,ENSG00000039523,ENSG00000042493,ENSG00000047230,ENSG00000052344,ENSG00000055483,ENSG00000065833,ENSG00000067113,ENSG00000067225,ENSG00000068394,ENSG00000070770,ENSG00000071859,ENSG00000072682,ENSG00000072786,ENSG00000075624,ENSG00000076706,ENSG00000077274,ENSG00000077454,ENSG00000083444,ENSG00000092820,ENSG00000096060,ENSG00000100092,ENSG00000100097…
106	rna	positive	TF	Factor: JUNB:FRA-2; motif: NRTGASTCAT; match class: 0	TF:M08923_0	0.00021562305030217106	823	531	107	6295	ENSG00000022267,ENSG00000039523,ENSG00000061273,ENSG00000065833,ENSG00000067225,ENSG00000068323,ENSG00000068366,ENSG00000068394,ENSG00000076043,ENSG00000077150,ENSG00000077274,ENSG00000096080,ENSG00000101421,ENSG00000101868,ENSG00000101935,ENSG00000101966,ENSG00000102054,ENSG00000102271,ENSG00000103187,ENSG00000105767,ENSG00000106397,ENSG00000107130,ENSG00000107372,ENSG00000108821,ENSG00000108828…
107	rna	positive	TF	Factor: ZGPAT; motif: GRGGCWGNGGNG; match class: 1	TF:M09739_1	0.00021562305030217106	894	531	114	6295	ENSG00000004059,ENSG00000007402,ENSG00000014216,ENSG00000019582,ENSG00000022267,ENSG00000029993,ENSG00000042493,ENSG00000056998,ENSG00000061273,ENSG00000070718,ENSG00000071859,ENSG00000072062,ENSG00000075624,ENSG00000077150,ENSG00000077454,ENSG00000088305,ENSG00000092820,ENSG00000099940,ENSG00000100092,ENSG00000101160,ENSG00000101421,ENSG00000102119,ENSG00000102178,ENSG00000103187,ENSG00000104833…
108	rna	positive	TF	Factor: JUNB:FRA-2; motif: NRTGASTCAT	TF:M08923	0.00021562305030217106	823	531	107	6295	ENSG00000022267,ENSG00000039523,ENSG00000061273,ENSG00000065833,ENSG00000067225,ENSG00000068323,ENSG00000068366,ENSG00000068394,ENSG00000076043,ENSG00000077150,ENSG00000077274,ENSG00000096080,ENSG00000101421,ENSG00000101868,ENSG00000101935,ENSG00000101966,ENSG00000102054,ENSG00000102271,ENSG00000103187,ENSG00000105767,ENSG00000106397,ENSG00000107130,ENSG00000107372,ENSG00000108821,ENSG00000108828…
109	rna	positive	TF	Factor: JUNB:C-FOS; motif: NATGAGTCATNN	TF:M08925	0.00022835012131915453	976	531	122	6295	ENSG00000022267,ENSG00000039523,ENSG00000042493,ENSG00000061273,ENSG00000065833,ENSG00000067225,ENSG00000068323,ENSG00000068366,ENSG00000068394,ENSG00000072786,ENSG00000076043,ENSG00000077150,ENSG00000077274,ENSG00000087842,ENSG00000096080,ENSG00000101421,ENSG00000101868,ENSG00000101935,ENSG00000101966,ENSG00000102054,ENSG00000102230,ENSG00000102271,ENSG00000102858,ENSG00000103187,ENSG00000105767…
110	rna	positive	TF	Factor: JUNB:C-FOS; motif: NATGAGTCATNN; match class: 0	TF:M08925_0	0.00022835012131915453	976	531	122	6295	ENSG00000022267,ENSG00000039523,ENSG00000042493,ENSG00000061273,ENSG00000065833,ENSG00000067225,ENSG00000068323,ENSG00000068366,ENSG00000068394,ENSG00000072786,ENSG00000076043,ENSG00000077150,ENSG00000077274,ENSG00000087842,ENSG00000096080,ENSG00000101421,ENSG00000101868,ENSG00000101935,ENSG00000101966,ENSG00000102054,ENSG00000102230,ENSG00000102271,ENSG00000102858,ENSG00000103187,ENSG00000105767…
111	rna	positive	TF	Factor: HIC1; motif: NNNGGKTGCCCSNNNNNN	TF:M01073	0.00024038432489126012	1413	531	164	6295	ENSG00000004961,ENSG00000007402,ENSG00000007866,ENSG00000022267,ENSG00000024422,ENSG00000044446,ENSG00000046647,ENSG00000047230,ENSG00000056998,ENSG00000061273,ENSG00000063241,ENSG00000063601,ENSG00000063660,ENSG00000066629,ENSG00000067113,ENSG00000067225,ENSG00000067992,ENSG00000068366,ENSG00000070770,ENSG00000072786,ENSG00000075624,ENSG00000076706,ENSG00000077454,ENSG00000078808,ENSG00000082458…
112	rna	positive	TF	Factor: HIC1; motif: NNNGGKTGCCCSNNNNNN; match class: 0	TF:M01073_0	0.00024038432489126012	1413	531	164	6295	ENSG00000004961,ENSG00000007402,ENSG00000007866,ENSG00000022267,ENSG00000024422,ENSG00000044446,ENSG00000046647,ENSG00000047230,ENSG00000056998,ENSG00000061273,ENSG00000063241,ENSG00000063601,ENSG00000063660,ENSG00000066629,ENSG00000067113,ENSG00000067225,ENSG00000067992,ENSG00000068366,ENSG00000070770,ENSG00000072786,ENSG00000075624,ENSG00000076706,ENSG00000077454,ENSG00000078808,ENSG00000082458…
113	rna	positive	TF	Factor: EGR1; motif: NACGCCCACGCANW; match class: 1	TF:M03896_1	0.0002563332362130782	869	531	111	6295	ENSG00000005302,ENSG00000007402,ENSG00000022267,ENSG00000044446,ENSG00000048028,ENSG00000055483,ENSG00000056277,ENSG00000056998,ENSG00000063601,ENSG00000063660,ENSG00000066629,ENSG00000068366,ENSG00000069869,ENSG00000071859,ENSG00000072062,ENSG00000072682,ENSG00000072786,ENSG00000078808,ENSG00000088808,ENSG00000096717,ENSG00000100417,ENSG00000101335,ENSG00000101935,ENSG00000102054,ENSG00000102096…
114	rna	positive	TF	Factor: GLI; motif: NGACCMCCCAN; match class: 1	TF:M07290_1	0.0002573358042694083	579	531	81	6295	ENSG00000007866,ENSG00000014216,ENSG00000052344,ENSG00000058668,ENSG00000061273,ENSG00000065833,ENSG00000068366,ENSG00000068400,ENSG00000072786,ENSG00000076706,ENSG00000076944,ENSG00000077150,ENSG00000083444,ENSG00000088808,ENSG00000089159,ENSG00000095380,ENSG00000096717,ENSG00000100092,ENSG00000101160,ENSG00000101849,ENSG00000101882,ENSG00000101911,ENSG00000101972,ENSG00000102038,ENSG00000102098…
115	rna	positive	TF	Factor: FRA-2; motif: RTGANTCA	TF:M08914	0.00029366420616113386	1106	531	134	6295	ENSG00000004961,ENSG00000022267,ENSG00000039523,ENSG00000061273,ENSG00000065833,ENSG00000067225,ENSG00000067992,ENSG00000068323,ENSG00000068366,ENSG00000068394,ENSG00000072786,ENSG00000076043,ENSG00000077150,ENSG00000077274,ENSG00000087842,ENSG00000096080,ENSG00000101421,ENSG00000101868,ENSG00000101935,ENSG00000101966,ENSG00000101974,ENSG00000102054,ENSG00000102218,ENSG00000102230,ENSG00000102271…
116	rna	positive	TF	Factor: FRA-2; motif: RTGANTCA; match class: 0	TF:M08914_0	0.00029366420616113386	1106	531	134	6295	ENSG00000004961,ENSG00000022267,ENSG00000039523,ENSG00000061273,ENSG00000065833,ENSG00000067225,ENSG00000067992,ENSG00000068323,ENSG00000068366,ENSG00000068394,ENSG00000072786,ENSG00000076043,ENSG00000077150,ENSG00000077274,ENSG00000087842,ENSG00000096080,ENSG00000101421,ENSG00000101868,ENSG00000101935,ENSG00000101966,ENSG00000101974,ENSG00000102054,ENSG00000102218,ENSG00000102230,ENSG00000102271…
117	rna	positive	TF	Factor: AP-2alpha; motif: NGCCYSNNGSN; match class: 0	TF:M01857_0	0.00029366420616113386	3443	531	341	6295	ENSG00000003509,ENSG00000004059,ENSG00000005022,ENSG00000005302,ENSG00000007402,ENSG00000007866,ENSG00000014216,ENSG00000022267,ENSG00000029993,ENSG00000038532,ENSG00000042493,ENSG00000044446,ENSG00000046647,ENSG00000046651,ENSG00000047230,ENSG00000048028,ENSG00000052344,ENSG00000055483,ENSG00000056277,ENSG00000056998,ENSG00000058668,ENSG00000061273,ENSG00000063241,ENSG00000063601,ENSG00000063660…
118	rna	positive	TF	Factor: AP-2alpha; motif: NGCCYSNNGSN	TF:M01857	0.00029366420616113386	3443	531	341	6295	ENSG00000003509,ENSG00000004059,ENSG00000005022,ENSG00000005302,ENSG00000007402,ENSG00000007866,ENSG00000014216,ENSG00000022267,ENSG00000029993,ENSG00000038532,ENSG00000042493,ENSG00000044446,ENSG00000046647,ENSG00000046651,ENSG00000047230,ENSG00000048028,ENSG00000052344,ENSG00000055483,ENSG00000056277,ENSG00000056998,ENSG00000058668,ENSG00000061273,ENSG00000063241,ENSG00000063601,ENSG00000063660…
119	rna	positive	TF	Factor: MOVO-B; motif: GNGGGGG; match class: 1	TF:M01104_1	0.0003218495523251753	2213	531	236	6295	ENSG00000004059,ENSG00000005302,ENSG00000007402,ENSG00000007866,ENSG00000022267,ENSG00000024422,ENSG00000034152,ENSG00000044446,ENSG00000047230,ENSG00000048028,ENSG00000055483,ENSG00000056277,ENSG00000056998,ENSG00000061273,ENSG00000063241,ENSG00000063601,ENSG00000063660,ENSG00000065833,ENSG00000067113,ENSG00000068366,ENSG00000069869,ENSG00000070770,ENSG00000071127,ENSG00000071859,ENSG00000072062…
120	rna	positive	TF	Factor: Egr-1; motif: GCGGGGGCGG	TF:M07354	0.000372864199829098	3138	531	315	6295	ENSG00000004059,ENSG00000005022,ENSG00000005302,ENSG00000006757,ENSG00000007402,ENSG00000007866,ENSG00000018610,ENSG00000022267,ENSG00000029993,ENSG00000042493,ENSG00000044446,ENSG00000047230,ENSG00000048028,ENSG00000055483,ENSG00000056277,ENSG00000056998,ENSG00000061273,ENSG00000063241,ENSG00000063601,ENSG00000063660,ENSG00000066629,ENSG00000067113,ENSG00000068323,ENSG00000068366,ENSG00000068394…
121	rna	positive	TF	Factor: c-Jun; motif: NNNNRRTGASTCAN; match class: 1	TF:M07102_1	0.000372864199829098	830	531	106	6295	ENSG00000022267,ENSG00000039523,ENSG00000061273,ENSG00000065833,ENSG00000067225,ENSG00000068323,ENSG00000068366,ENSG00000068394,ENSG00000076043,ENSG00000077150,ENSG00000077274,ENSG00000087842,ENSG00000096060,ENSG00000096080,ENSG00000101421,ENSG00000101868,ENSG00000101871,ENSG00000101935,ENSG00000101966,ENSG00000102054,ENSG00000102271,ENSG00000103187,ENSG00000105767,ENSG00000106397,ENSG00000107130…
122	rna	positive	TF	Factor: Egr-1; motif: GCGGGGGCGG; match class: 0	TF:M07354_0	0.000372864199829098	3138	531	315	6295	ENSG00000004059,ENSG00000005022,ENSG00000005302,ENSG00000006757,ENSG00000007402,ENSG00000007866,ENSG00000018610,ENSG00000022267,ENSG00000029993,ENSG00000042493,ENSG00000044446,ENSG00000047230,ENSG00000048028,ENSG00000055483,ENSG00000056277,ENSG00000056998,ENSG00000061273,ENSG00000063241,ENSG00000063601,ENSG00000063660,ENSG00000066629,ENSG00000067113,ENSG00000068323,ENSG00000068366,ENSG00000068394…
123	rna	positive	TF	Factor: Sp1; motif: NNGGGGCGGGGNN; match class: 0	TF:M00932_0	0.000372864199829098	4179	531	399	6295	ENSG00000004059,ENSG00000005022,ENSG00000005302,ENSG00000007402,ENSG00000007866,ENSG00000014216,ENSG00000018610,ENSG00000019582,ENSG00000022267,ENSG00000024422,ENSG00000029993,ENSG00000034152,ENSG00000038532,ENSG00000039523,ENSG00000042493,ENSG00000044446,ENSG00000046647,ENSG00000046651,ENSG00000046653,ENSG00000048028,ENSG00000052344,ENSG00000055483,ENSG00000056277,ENSG00000056998,ENSG00000058668…
124	rna	positive	TF	Factor: Sp1; motif: NNGGGGCGGGGNN	TF:M00932	0.000372864199829098	4179	531	399	6295	ENSG00000004059,ENSG00000005022,ENSG00000005302,ENSG00000007402,ENSG00000007866,ENSG00000014216,ENSG00000018610,ENSG00000019582,ENSG00000022267,ENSG00000024422,ENSG00000029993,ENSG00000034152,ENSG00000038532,ENSG00000039523,ENSG00000042493,ENSG00000044446,ENSG00000046647,ENSG00000046651,ENSG00000046653,ENSG00000048028,ENSG00000052344,ENSG00000055483,ENSG00000056277,ENSG00000056998,ENSG00000058668…
125	rna	positive	TF	Factor: LKLF; motif: CNCCACCCS; match class: 0	TF:M08819_0	0.000372864199829098	1828	531	201	6295	ENSG00000005022,ENSG00000007402,ENSG00000007866,ENSG00000014216,ENSG00000029993,ENSG00000031698,ENSG00000039523,ENSG00000046653,ENSG00000061273,ENSG00000063601,ENSG00000063660,ENSG00000067113,ENSG00000067225,ENSG00000067992,ENSG00000068366,ENSG00000068394,ENSG00000068400,ENSG00000071127,ENSG00000071282,ENSG00000072501,ENSG00000072786,ENSG00000075624,ENSG00000076043,ENSG00000076706,ENSG00000077454…
126	rna	positive	TF	Factor: LKLF; motif: CNCCACCCS	TF:M08819	0.000372864199829098	1828	531	201	6295	ENSG00000005022,ENSG00000007402,ENSG00000007866,ENSG00000014216,ENSG00000029993,ENSG00000031698,ENSG00000039523,ENSG00000046653,ENSG00000061273,ENSG00000063601,ENSG00000063660,ENSG00000067113,ENSG00000067225,ENSG00000067992,ENSG00000068366,ENSG00000068394,ENSG00000068400,ENSG00000071127,ENSG00000071282,ENSG00000072501,ENSG00000072786,ENSG00000075624,ENSG00000076043,ENSG00000076706,ENSG00000077454…
127	rna	positive	TF	Factor: Sp4; motif: SCCCCKCCCCCSN; match class: 1	TF:M07617_1	0.000372864199829098	403	531	61	6295	ENSG00000005302,ENSG00000007866,ENSG00000048028,ENSG00000070770,ENSG00000072062,ENSG00000077721,ENSG00000088808,ENSG00000089159,ENSG00000095380,ENSG00000100097,ENSG00000102038,ENSG00000102054,ENSG00000102119,ENSG00000102221,ENSG00000104518,ENSG00000105088,ENSG00000105321,ENSG00000105767,ENSG00000107130,ENSG00000108830,ENSG00000109381,ENSG00000110435,ENSG00000110651,ENSG00000110880,ENSG00000116661…
128	rna	positive	TF	Factor: AP-2gamma; motif: NTGSCCTGRGGSNN	TF:M09591	0.0004630871611234706	2768	531	283	6295	ENSG00000004961,ENSG00000005302,ENSG00000006757,ENSG00000007866,ENSG00000014216,ENSG00000019582,ENSG00000029993,ENSG00000031698,ENSG00000039523,ENSG00000044446,ENSG00000047230,ENSG00000048028,ENSG00000052344,ENSG00000055483,ENSG00000061273,ENSG00000063241,ENSG00000063601,ENSG00000063660,ENSG00000065833,ENSG00000067113,ENSG00000067992,ENSG00000068323,ENSG00000068394,ENSG00000070718,ENSG00000070770…
129	rna	positive	TF	Factor: AP-2gamma; motif: NTGSCCTGRGGSNN; match class: 0	TF:M09591_0	0.0004630871611234706	2768	531	283	6295	ENSG00000004961,ENSG00000005302,ENSG00000006757,ENSG00000007866,ENSG00000014216,ENSG00000019582,ENSG00000029993,ENSG00000031698,ENSG00000039523,ENSG00000044446,ENSG00000047230,ENSG00000048028,ENSG00000052344,ENSG00000055483,ENSG00000061273,ENSG00000063241,ENSG00000063601,ENSG00000063660,ENSG00000065833,ENSG00000067113,ENSG00000067992,ENSG00000068323,ENSG00000068394,ENSG00000070718,ENSG00000070770…
130	rna	positive	TF	Factor: JUNB:C-FOS; motif: NATGAGTCATNN; match class: 1	TF:M08925_1	0.0004652334459285875	371	531	57	6295	ENSG00000022267,ENSG00000061273,ENSG00000067225,ENSG00000068323,ENSG00000068366,ENSG00000068394,ENSG00000077150,ENSG00000096080,ENSG00000101935,ENSG00000101966,ENSG00000102271,ENSG00000103187,ENSG00000106397,ENSG00000108821,ENSG00000111275,ENSG00000119888,ENSG00000120549,ENSG00000120885,ENSG00000123130,ENSG00000124839,ENSG00000125827,ENSG00000125970,ENSG00000130176,ENSG00000130177,ENSG00000130479…
131	rna	positive	TF	Factor: C-FOS:C-JUN; motif: ATGAGTCAYN; match class: 0	TF:M08942_0	0.0004815331308519359	947	531	117	6295	ENSG00000022267,ENSG00000039523,ENSG00000042493,ENSG00000061273,ENSG00000065833,ENSG00000067225,ENSG00000068323,ENSG00000068366,ENSG00000068394,ENSG00000072786,ENSG00000076043,ENSG00000077150,ENSG00000077274,ENSG00000087842,ENSG00000096080,ENSG00000101868,ENSG00000101871,ENSG00000101935,ENSG00000101966,ENSG00000102054,ENSG00000102225,ENSG00000102230,ENSG00000102858,ENSG00000103187,ENSG00000105767…
132	rna	positive	TF	Factor: Churchill; motif: CGGGNN; match class: 1	TF:M00986_1	0.0004815331308519359	4086	531	391	6295	ENSG00000003509,ENSG00000004059,ENSG00000004961,ENSG00000005022,ENSG00000005302,ENSG00000007402,ENSG00000007866,ENSG00000014216,ENSG00000018610,ENSG00000019582,ENSG00000022267,ENSG00000024422,ENSG00000029993,ENSG00000034152,ENSG00000039523,ENSG00000042493,ENSG00000044446,ENSG00000046651,ENSG00000047230,ENSG00000048028,ENSG00000055483,ENSG00000056277,ENSG00000056998,ENSG00000061273,ENSG00000063241…
133	rna	positive	TF	Factor: C-FOS:C-JUN; motif: ATGAGTCAYN	TF:M08942	0.0004815331308519359	947	531	117	6295	ENSG00000022267,ENSG00000039523,ENSG00000042493,ENSG00000061273,ENSG00000065833,ENSG00000067225,ENSG00000068323,ENSG00000068366,ENSG00000068394,ENSG00000072786,ENSG00000076043,ENSG00000077150,ENSG00000077274,ENSG00000087842,ENSG00000096080,ENSG00000101868,ENSG00000101871,ENSG00000101935,ENSG00000101966,ENSG00000102054,ENSG00000102225,ENSG00000102230,ENSG00000102858,ENSG00000103187,ENSG00000105767…
134	rna	positive	TF	Factor: EGR; motif: CGCCCCCGCNN; match class: 1	TF:M08878_1	0.0004815331308519359	1330	531	154	6295	ENSG00000005022,ENSG00000005302,ENSG00000007402,ENSG00000007866,ENSG00000029993,ENSG00000044446,ENSG00000048028,ENSG00000056998,ENSG00000063241,ENSG00000063601,ENSG00000063660,ENSG00000066629,ENSG00000068366,ENSG00000069869,ENSG00000070718,ENSG00000071127,ENSG00000072062,ENSG00000072506,ENSG00000072682,ENSG00000072786,ENSG00000076716,ENSG00000076944,ENSG00000077150,ENSG00000078808,ENSG00000088305…
135	rna	positive	TF	Factor: AP-2alpha; motif: NTNSCCTGRGGSNAN; match class: 0	TF:M09590_0	0.0005313642832557727	1677	531	186	6295	ENSG00000004961,ENSG00000005302,ENSG00000006757,ENSG00000014216,ENSG00000019582,ENSG00000029993,ENSG00000031698,ENSG00000044446,ENSG00000047230,ENSG00000048028,ENSG00000052344,ENSG00000055483,ENSG00000065833,ENSG00000067992,ENSG00000068323,ENSG00000068394,ENSG00000070718,ENSG00000070770,ENSG00000071859,ENSG00000072501,ENSG00000072786,ENSG00000075624,ENSG00000076716,ENSG00000082458,ENSG00000087842…
136	rna	positive	TF	Factor: AP-2alpha; motif: NTNSCCTGRGGSNAN	TF:M09590	0.0005313642832557727	1677	531	186	6295	ENSG00000004961,ENSG00000005302,ENSG00000006757,ENSG00000014216,ENSG00000019582,ENSG00000029993,ENSG00000031698,ENSG00000044446,ENSG00000047230,ENSG00000048028,ENSG00000052344,ENSG00000055483,ENSG00000065833,ENSG00000067992,ENSG00000068323,ENSG00000068394,ENSG00000070718,ENSG00000070770,ENSG00000071859,ENSG00000072501,ENSG00000072786,ENSG00000075624,ENSG00000076716,ENSG00000082458,ENSG00000087842…
137	rna	positive	TF	Factor: WT1; motif: GNGGGGGCGGGG; match class: 1	TF:M03893_1	0.0005388115869635269	1645	531	183	6295	ENSG00000004059,ENSG00000005022,ENSG00000005302,ENSG00000007402,ENSG00000007866,ENSG00000029993,ENSG00000048028,ENSG00000056277,ENSG00000063241,ENSG00000063601,ENSG00000063660,ENSG00000066629,ENSG00000068400,ENSG00000070770,ENSG00000071127,ENSG00000072062,ENSG00000072682,ENSG00000072786,ENSG00000076706,ENSG00000076716,ENSG00000076944,ENSG00000077150,ENSG00000077454,ENSG00000077721,ENSG00000086712…
138	rna	positive	TF	Factor: JUNB:FRA-1; motif: NNRTGACTCATNN; match class: 0	TF:M08922_0	0.0005649407412652803	503	531	71	6295	ENSG00000061273,ENSG00000065833,ENSG00000067225,ENSG00000068323,ENSG00000068394,ENSG00000076043,ENSG00000077150,ENSG00000077274,ENSG00000096080,ENSG00000101868,ENSG00000101935,ENSG00000101966,ENSG00000102054,ENSG00000103187,ENSG00000105767,ENSG00000106397,ENSG00000108821,ENSG00000111275,ENSG00000117877,ENSG00000119888,ENSG00000120549,ENSG00000120885,ENSG00000123130,ENSG00000124839,ENSG00000125827…
139	rna	positive	TF	Factor: AP-2beta; motif: GCNNNGGSCNGVGGGN	TF:M01858	0.0005649407412652803	2767	531	282	6295	ENSG00000004059,ENSG00000004961,ENSG00000005022,ENSG00000005302,ENSG00000007402,ENSG00000007866,ENSG00000014216,ENSG00000029993,ENSG00000034152,ENSG00000038532,ENSG00000039523,ENSG00000055483,ENSG00000056277,ENSG00000056998,ENSG00000061273,ENSG00000063601,ENSG00000063660,ENSG00000065833,ENSG00000066629,ENSG00000067113,ENSG00000067225,ENSG00000070718,ENSG00000070770,ENSG00000071127,ENSG00000071282…
140	rna	positive	TF	Factor: ZGPAT; motif: GRGGCWGNGGNG	TF:M09739	0.0005649407412652803	2790	531	284	6295	ENSG00000004059,ENSG00000004961,ENSG00000005022,ENSG00000007402,ENSG00000007866,ENSG00000014216,ENSG00000019582,ENSG00000022267,ENSG00000029993,ENSG00000034152,ENSG00000042493,ENSG00000044446,ENSG00000046651,ENSG00000047230,ENSG00000055483,ENSG00000056277,ENSG00000056998,ENSG00000058668,ENSG00000061273,ENSG00000063241,ENSG00000066629,ENSG00000067113,ENSG00000067992,ENSG00000068323,ENSG00000068394…
141	rna	positive	TF	Factor: ZGPAT; motif: GRGGCWGNGGNG; match class: 0	TF:M09739_0	0.0005649407412652803	2790	531	284	6295	ENSG00000004059,ENSG00000004961,ENSG00000005022,ENSG00000007402,ENSG00000007866,ENSG00000014216,ENSG00000019582,ENSG00000022267,ENSG00000029993,ENSG00000034152,ENSG00000042493,ENSG00000044446,ENSG00000046651,ENSG00000047230,ENSG00000055483,ENSG00000056277,ENSG00000056998,ENSG00000058668,ENSG00000061273,ENSG00000063241,ENSG00000066629,ENSG00000067113,ENSG00000067992,ENSG00000068323,ENSG00000068394…
142	rna	positive	TF	Factor: AP-2beta; motif: GCNNNGGSCNGVGGGN; match class: 0	TF:M01858_0	0.0005649407412652803	2767	531	282	6295	ENSG00000004059,ENSG00000004961,ENSG00000005022,ENSG00000005302,ENSG00000007402,ENSG00000007866,ENSG00000014216,ENSG00000029993,ENSG00000034152,ENSG00000038532,ENSG00000039523,ENSG00000055483,ENSG00000056277,ENSG00000056998,ENSG00000061273,ENSG00000063601,ENSG00000063660,ENSG00000065833,ENSG00000066629,ENSG00000067113,ENSG00000067225,ENSG00000070718,ENSG00000070770,ENSG00000071127,ENSG00000071282…
143	rna	positive	TF	Factor: JUNB:FRA-1; motif: NNRTGACTCATNN	TF:M08922	0.0005649407412652803	503	531	71	6295	ENSG00000061273,ENSG00000065833,ENSG00000067225,ENSG00000068323,ENSG00000068394,ENSG00000076043,ENSG00000077150,ENSG00000077274,ENSG00000096080,ENSG00000101868,ENSG00000101935,ENSG00000101966,ENSG00000102054,ENSG00000103187,ENSG00000105767,ENSG00000106397,ENSG00000108821,ENSG00000111275,ENSG00000117877,ENSG00000119888,ENSG00000120549,ENSG00000120885,ENSG00000123130,ENSG00000124839,ENSG00000125827…
144	rna	positive	TF	Factor: Sp1; motif: NGGGGCGGGGN; match class: 1	TF:M07395_1	0.000617091848925232	2700	531	276	6295	ENSG00000004059,ENSG00000005022,ENSG00000005302,ENSG00000007402,ENSG00000007866,ENSG00000014216,ENSG00000022267,ENSG00000024422,ENSG00000029993,ENSG00000034152,ENSG00000044446,ENSG00000048028,ENSG00000055483,ENSG00000056998,ENSG00000061273,ENSG00000063241,ENSG00000063601,ENSG00000063660,ENSG00000065833,ENSG00000067113,ENSG00000069869,ENSG00000070718,ENSG00000070770,ENSG00000071859,ENSG00000072062…
145	rna	positive	TF	Factor: CKROX; motif: SCCCTCCCC	TF:M01175	0.0006288316920527457	2585	531	266	6295	ENSG00000004059,ENSG00000004961,ENSG00000005302,ENSG00000007402,ENSG00000007866,ENSG00000014216,ENSG00000022267,ENSG00000031698,ENSG00000039523,ENSG00000046651,ENSG00000052344,ENSG00000055483,ENSG00000056277,ENSG00000056998,ENSG00000061273,ENSG00000063241,ENSG00000063601,ENSG00000063660,ENSG00000067113,ENSG00000067225,ENSG00000068323,ENSG00000068400,ENSG00000069869,ENSG00000070718,ENSG00000071127…
146	rna	positive	TF	Factor: CKROX; motif: SCCCTCCCC; match class: 0	TF:M01175_0	0.0006288316920527457	2585	531	266	6295	ENSG00000004059,ENSG00000004961,ENSG00000005302,ENSG00000007402,ENSG00000007866,ENSG00000014216,ENSG00000022267,ENSG00000031698,ENSG00000039523,ENSG00000046651,ENSG00000052344,ENSG00000055483,ENSG00000056277,ENSG00000056998,ENSG00000061273,ENSG00000063241,ENSG00000063601,ENSG00000063660,ENSG00000067113,ENSG00000067225,ENSG00000068323,ENSG00000068400,ENSG00000069869,ENSG00000070718,ENSG00000071127…
147	rna	positive	TF	Factor: Kaiso; motif: GCMGGGRGCRGS; match class: 1	TF:M03876_1	0.0006346508065388356	3404	531	335	6295	ENSG00000004059,ENSG00000005022,ENSG00000005302,ENSG00000007402,ENSG00000007866,ENSG00000014216,ENSG00000022267,ENSG00000024422,ENSG00000029993,ENSG00000034152,ENSG00000039523,ENSG00000044446,ENSG00000046647,ENSG00000046651,ENSG00000047230,ENSG00000048028,ENSG00000055483,ENSG00000056277,ENSG00000056998,ENSG00000058668,ENSG00000061273,ENSG00000063601,ENSG00000063660,ENSG00000065833,ENSG00000066629…
148	rna	positive	TF	Factor: EGR; motif: CGCCCCCGCNN; match class: 0	TF:M08878_0	0.0006569002319124389	2962	531	298	6295	ENSG00000004059,ENSG00000005022,ENSG00000005302,ENSG00000006757,ENSG00000007402,ENSG00000007866,ENSG00000018610,ENSG00000022267,ENSG00000029993,ENSG00000034152,ENSG00000039523,ENSG00000044446,ENSG00000048028,ENSG00000055483,ENSG00000056277,ENSG00000056998,ENSG00000061273,ENSG00000063241,ENSG00000063601,ENSG00000063660,ENSG00000066629,ENSG00000067113,ENSG00000068323,ENSG00000068366,ENSG00000068394…
149	rna	positive	TF	Factor: EGR; motif: CGCCCCCGCNN	TF:M08878	0.0006569002319124389	2962	531	298	6295	ENSG00000004059,ENSG00000005022,ENSG00000005302,ENSG00000006757,ENSG00000007402,ENSG00000007866,ENSG00000018610,ENSG00000022267,ENSG00000029993,ENSG00000034152,ENSG00000039523,ENSG00000044446,ENSG00000048028,ENSG00000055483,ENSG00000056277,ENSG00000056998,ENSG00000061273,ENSG00000063241,ENSG00000063601,ENSG00000063660,ENSG00000066629,ENSG00000067113,ENSG00000068323,ENSG00000068366,ENSG00000068394…
150	rna	positive	TF	Factor: ETF; motif: CCCCGCCCCYN; match class: 1	TF:M07039_1	0.0006971083147789603	5054	531	463	6295	ENSG00000004059,ENSG00000004961,ENSG00000005022,ENSG00000005302,ENSG00000007402,ENSG00000007866,ENSG00000014216,ENSG00000018610,ENSG00000019582,ENSG00000022267,ENSG00000024422,ENSG00000029993,ENSG00000031698,ENSG00000034152,ENSG00000039523,ENSG00000044446,ENSG00000046651,ENSG00000046653,ENSG00000048028,ENSG00000052344,ENSG00000055483,ENSG00000056277,ENSG00000056998,ENSG00000058668,ENSG00000061273…
151	rna	positive	TF	Factor: Sp3; motif: ASMCTTGGGSRGGG; match class: 0	TF:M00665_0	0.0007501326158147378	2639	531	270	6295	ENSG00000004059,ENSG00000004961,ENSG00000021826,ENSG00000022267,ENSG00000024422,ENSG00000034152,ENSG00000038532,ENSG00000044446,ENSG00000046651,ENSG00000047230,ENSG00000055483,ENSG00000056277,ENSG00000056998,ENSG00000061273,ENSG00000063241,ENSG00000063601,ENSG00000065833,ENSG00000067113,ENSG00000067992,ENSG00000071127,ENSG00000071859,ENSG00000072062,ENSG00000072501,ENSG00000072506,ENSG00000072682…
152	rna	positive	TF	Factor: Zic3; motif: NGGGKGGTC; match class: 1	TF:M00450_1	0.0007501326158147378	2592	531	266	6295	ENSG00000003509,ENSG00000004961,ENSG00000006757,ENSG00000007402,ENSG00000007866,ENSG00000014216,ENSG00000019582,ENSG00000029993,ENSG00000034152,ENSG00000039523,ENSG00000044446,ENSG00000046653,ENSG00000047230,ENSG00000052344,ENSG00000056998,ENSG00000058668,ENSG00000061273,ENSG00000063241,ENSG00000065833,ENSG00000067225,ENSG00000067992,ENSG00000068323,ENSG00000068366,ENSG00000068400,ENSG00000069869…
153	rna	positive	TF	Factor: Sp3; motif: ASMCTTGGGSRGGG	TF:M00665	0.0007501326158147378	2639	531	270	6295	ENSG00000004059,ENSG00000004961,ENSG00000021826,ENSG00000022267,ENSG00000024422,ENSG00000034152,ENSG00000038532,ENSG00000044446,ENSG00000046651,ENSG00000047230,ENSG00000055483,ENSG00000056277,ENSG00000056998,ENSG00000061273,ENSG00000063241,ENSG00000063601,ENSG00000065833,ENSG00000067113,ENSG00000067992,ENSG00000071127,ENSG00000071859,ENSG00000072062,ENSG00000072501,ENSG00000072506,ENSG00000072682…
154	rna	positive	TF	Factor: LKLF; motif: GGGGTGGKSN; match class: 1	TF:M07261_1	0.0007501326158147378	1367	531	156	6295	ENSG00000005022,ENSG00000006757,ENSG00000007866,ENSG00000014216,ENSG00000031698,ENSG00000039523,ENSG00000046651,ENSG00000056998,ENSG00000061273,ENSG00000063241,ENSG00000063601,ENSG00000065833,ENSG00000067225,ENSG00000067992,ENSG00000068366,ENSG00000075624,ENSG00000076043,ENSG00000076706,ENSG00000076944,ENSG00000077454,ENSG00000077721,ENSG00000082458,ENSG00000089159,ENSG00000096060,ENSG00000100097…
155	rna	positive	TF	Factor: WT1; motif: NGCGGGGGGGTSMMCYN; match class: 0	TF:M05327_0	0.0008786988610653285	2163	531	228	6295	ENSG00000005022,ENSG00000007402,ENSG00000007866,ENSG00000018610,ENSG00000019582,ENSG00000022267,ENSG00000029993,ENSG00000039523,ENSG00000044446,ENSG00000046651,ENSG00000047230,ENSG00000048028,ENSG00000055483,ENSG00000056277,ENSG00000056998,ENSG00000063241,ENSG00000063601,ENSG00000063660,ENSG00000066629,ENSG00000067225,ENSG00000068366,ENSG00000068400,ENSG00000070770,ENSG00000071127,ENSG00000071282…
156	rna	positive	TF	Factor: WT1; motif: NGCGGGGGGGTSMMCYN	TF:M05327	0.0008786988610653285	2163	531	228	6295	ENSG00000005022,ENSG00000007402,ENSG00000007866,ENSG00000018610,ENSG00000019582,ENSG00000022267,ENSG00000029993,ENSG00000039523,ENSG00000044446,ENSG00000046651,ENSG00000047230,ENSG00000048028,ENSG00000055483,ENSG00000056277,ENSG00000056998,ENSG00000063241,ENSG00000063601,ENSG00000063660,ENSG00000066629,ENSG00000067225,ENSG00000068366,ENSG00000068400,ENSG00000070770,ENSG00000071127,ENSG00000071282…
157	rna	positive	TF	Factor: JUNB:FRA-2; motif: NRTGASTCAT; match class: 1	TF:M08923_1	0.0008786988610653285	428	531	62	6295	ENSG00000022267,ENSG00000061273,ENSG00000067225,ENSG00000068323,ENSG00000068366,ENSG00000068394,ENSG00000077150,ENSG00000096080,ENSG00000101421,ENSG00000101935,ENSG00000101966,ENSG00000102271,ENSG00000103187,ENSG00000106397,ENSG00000107130,ENSG00000108821,ENSG00000111275,ENSG00000119888,ENSG00000120549,ENSG00000120885,ENSG00000123130,ENSG00000123131,ENSG00000124839,ENSG00000125827,ENSG00000125970…
158	rna	positive	TF	Factor: Sp2; motif: GYCCCGCCYCYNNNN; match class: 1	TF:M07129_1	0.0009041782054000273	1078	531	128	6295	ENSG00000004059,ENSG00000005302,ENSG00000007402,ENSG00000007866,ENSG00000022267,ENSG00000029993,ENSG00000044446,ENSG00000048028,ENSG00000063241,ENSG00000063660,ENSG00000070718,ENSG00000076706,ENSG00000077721,ENSG00000086712,ENSG00000088305,ENSG00000088808,ENSG00000089159,ENSG00000095380,ENSG00000100097,ENSG00000100417,ENSG00000101335,ENSG00000102038,ENSG00000102054,ENSG00000102103,ENSG00000102119…
159	rna	positive	TF	Factor: c-Fos; motif: NNTGASTCATN	TF:M07090	0.0010006522072927542	1206	531	140	6295	ENSG00000004961,ENSG00000022267,ENSG00000039523,ENSG00000042493,ENSG00000061273,ENSG00000065833,ENSG00000067225,ENSG00000067992,ENSG00000068323,ENSG00000068366,ENSG00000068394,ENSG00000076043,ENSG00000077150,ENSG00000077274,ENSG00000087842,ENSG00000096080,ENSG00000101421,ENSG00000101868,ENSG00000101871,ENSG00000101935,ENSG00000101966,ENSG00000101974,ENSG00000102054,ENSG00000102218,ENSG00000102225…
160	rna	positive	TF	Factor: c-Fos; motif: NNTGASTCATN; match class: 0	TF:M07090_0	0.0010006522072927542	1206	531	140	6295	ENSG00000004961,ENSG00000022267,ENSG00000039523,ENSG00000042493,ENSG00000061273,ENSG00000065833,ENSG00000067225,ENSG00000067992,ENSG00000068323,ENSG00000068366,ENSG00000068394,ENSG00000076043,ENSG00000077150,ENSG00000077274,ENSG00000087842,ENSG00000096080,ENSG00000101421,ENSG00000101868,ENSG00000101871,ENSG00000101935,ENSG00000101966,ENSG00000101974,ENSG00000102054,ENSG00000102218,ENSG00000102225…
161	rna	positive	TF	Factor: MAZ; motif: GGGGAGGG; match class: 1	TF:M00649_1	0.0010006522072927542	1472	531	165	6295	ENSG00000007866,ENSG00000014216,ENSG00000022267,ENSG00000031698,ENSG00000039523,ENSG00000052344,ENSG00000055483,ENSG00000056277,ENSG00000056998,ENSG00000061273,ENSG00000063601,ENSG00000063660,ENSG00000070770,ENSG00000071127,ENSG00000071282,ENSG00000072062,ENSG00000076706,ENSG00000077150,ENSG00000082458,ENSG00000088305,ENSG00000088808,ENSG00000092148,ENSG00000092820,ENSG00000096060,ENSG00000100092…
162	rna	positive	TF	Factor: Osx; motif: CCNCCCCCNNN; match class: 0	TF:M07329_0	0.0010006522072927542	2650	531	270	6295	ENSG00000004059,ENSG00000004961,ENSG00000005022,ENSG00000005302,ENSG00000007402,ENSG00000007866,ENSG00000014216,ENSG00000022267,ENSG00000029993,ENSG00000034152,ENSG00000039523,ENSG00000042493,ENSG00000044446,ENSG00000047230,ENSG00000048028,ENSG00000056277,ENSG00000061273,ENSG00000063241,ENSG00000063601,ENSG00000066629,ENSG00000067113,ENSG00000068323,ENSG00000068394,ENSG00000068400,ENSG00000070718…
163	rna	positive	TF	Factor: Osx; motif: CCNCCCCCNNN	TF:M07329	0.0010006522072927542	2650	531	270	6295	ENSG00000004059,ENSG00000004961,ENSG00000005022,ENSG00000005302,ENSG00000007402,ENSG00000007866,ENSG00000014216,ENSG00000022267,ENSG00000029993,ENSG00000034152,ENSG00000039523,ENSG00000042493,ENSG00000044446,ENSG00000047230,ENSG00000048028,ENSG00000056277,ENSG00000061273,ENSG00000063241,ENSG00000063601,ENSG00000066629,ENSG00000067113,ENSG00000068323,ENSG00000068394,ENSG00000068400,ENSG00000070718…
164	rna	positive	TF	Factor: NGFI-C; motif: WTGCGTGGGYGG; match class: 1	TF:M00244_1	0.0010143782855288476	737	531	94	6295	ENSG00000004059,ENSG00000005022,ENSG00000005302,ENSG00000044446,ENSG00000047230,ENSG00000048028,ENSG00000056277,ENSG00000063601,ENSG00000063660,ENSG00000068323,ENSG00000068366,ENSG00000072062,ENSG00000072786,ENSG00000076043,ENSG00000077150,ENSG00000082458,ENSG00000095380,ENSG00000096717,ENSG00000101868,ENSG00000101966,ENSG00000102096,ENSG00000102098,ENSG00000102119,ENSG00000102172,ENSG00000102178…
165	rna	positive	TF	Factor: AP-2alpha; motif: NGCCYSNNGSN; match class: 1	TF:M01857_1	0.0011234849875943929	1770	531	192	6295	ENSG00000005302,ENSG00000007402,ENSG00000007866,ENSG00000014216,ENSG00000029993,ENSG00000042493,ENSG00000046647,ENSG00000048028,ENSG00000055483,ENSG00000056998,ENSG00000061273,ENSG00000063660,ENSG00000066629,ENSG00000068323,ENSG00000070770,ENSG00000071127,ENSG00000075624,ENSG00000076706,ENSG00000076716,ENSG00000076944,ENSG00000077454,ENSG00000077721,ENSG00000078808,ENSG00000082458,ENSG00000083444…
166	rna	positive	TF	Factor: c-Fos; motif: RTGAGTCAYNN; match class: 0	TF:M09617_0	0.0011305203406927538	790	531	99	6295	ENSG00000039523,ENSG00000061273,ENSG00000065833,ENSG00000067225,ENSG00000068323,ENSG00000068394,ENSG00000072786,ENSG00000076043,ENSG00000077150,ENSG00000077274,ENSG00000087842,ENSG00000096080,ENSG00000101868,ENSG00000101935,ENSG00000101966,ENSG00000102054,ENSG00000102230,ENSG00000102858,ENSG00000103187,ENSG00000105767,ENSG00000106397,ENSG00000107372,ENSG00000108828,ENSG00000111275,ENSG00000117676…
167	rna	positive	TF	Factor: Zic3; motif: NGGGKGGTC; match class: 0	TF:M00450_0	0.0011305203406927538	4587	531	427	6295	ENSG00000003509,ENSG00000004059,ENSG00000004961,ENSG00000005022,ENSG00000005302,ENSG00000006757,ENSG00000007402,ENSG00000007866,ENSG00000014216,ENSG00000019582,ENSG00000022267,ENSG00000024422,ENSG00000029993,ENSG00000031698,ENSG00000034152,ENSG00000038532,ENSG00000039523,ENSG00000044446,ENSG00000046647,ENSG00000046651,ENSG00000046653,ENSG00000047230,ENSG00000052344,ENSG00000055483,ENSG00000056998…
168	rna	positive	TF	Factor: c-Fos; motif: RTGAGTCAYNN	TF:M09617	0.0011305203406927538	790	531	99	6295	ENSG00000039523,ENSG00000061273,ENSG00000065833,ENSG00000067225,ENSG00000068323,ENSG00000068394,ENSG00000072786,ENSG00000076043,ENSG00000077150,ENSG00000077274,ENSG00000087842,ENSG00000096080,ENSG00000101868,ENSG00000101935,ENSG00000101966,ENSG00000102054,ENSG00000102230,ENSG00000102858,ENSG00000103187,ENSG00000105767,ENSG00000106397,ENSG00000107372,ENSG00000108828,ENSG00000111275,ENSG00000117676…
169	rna	positive	TF	Factor: SP1; motif: GGGGYGGGGNS; match class: 1	TF:M01303_1	0.0011305203406927538	1413	531	159	6295	ENSG00000005302,ENSG00000007402,ENSG00000007866,ENSG00000014216,ENSG00000022267,ENSG00000029993,ENSG00000039523,ENSG00000044446,ENSG00000055483,ENSG00000056998,ENSG00000061273,ENSG00000063601,ENSG00000063660,ENSG00000067113,ENSG00000070718,ENSG00000070770,ENSG00000071127,ENSG00000072501,ENSG00000072786,ENSG00000075624,ENSG00000076706,ENSG00000076944,ENSG00000077721,ENSG00000088808,ENSG00000089159…
170	rna	positive	TF	Factor: EGR-1; motif: TGCGTGGGCGK; match class: 0	TF:M01972_0	0.0011305203406927538	2117	531	223	6295	ENSG00000003509,ENSG00000004059,ENSG00000005022,ENSG00000005302,ENSG00000007402,ENSG00000018610,ENSG00000022267,ENSG00000031698,ENSG00000038532,ENSG00000044446,ENSG00000047230,ENSG00000048028,ENSG00000055483,ENSG00000056277,ENSG00000063601,ENSG00000063660,ENSG00000065833,ENSG00000067113,ENSG00000068323,ENSG00000068366,ENSG00000070718,ENSG00000070770,ENSG00000071127,ENSG00000072062,ENSG00000072506…
171	rna	positive	TF	Factor: EGR-1; motif: TGCGTGGGCGK	TF:M01972	0.0011305203406927538	2117	531	223	6295	ENSG00000003509,ENSG00000004059,ENSG00000005022,ENSG00000005302,ENSG00000007402,ENSG00000018610,ENSG00000022267,ENSG00000031698,ENSG00000038532,ENSG00000044446,ENSG00000047230,ENSG00000048028,ENSG00000055483,ENSG00000056277,ENSG00000063601,ENSG00000063660,ENSG00000065833,ENSG00000067113,ENSG00000068323,ENSG00000068366,ENSG00000070718,ENSG00000070770,ENSG00000071127,ENSG00000072062,ENSG00000072506…
172	rna	positive	TF	Factor: Zic3; motif: NGGGKGGTC	TF:M00450	0.0011305203406927538	4587	531	427	6295	ENSG00000003509,ENSG00000004059,ENSG00000004961,ENSG00000005022,ENSG00000005302,ENSG00000006757,ENSG00000007402,ENSG00000007866,ENSG00000014216,ENSG00000019582,ENSG00000022267,ENSG00000024422,ENSG00000029993,ENSG00000031698,ENSG00000034152,ENSG00000038532,ENSG00000039523,ENSG00000044446,ENSG00000046647,ENSG00000046651,ENSG00000046653,ENSG00000047230,ENSG00000052344,ENSG00000055483,ENSG00000056998…
173	rna	positive	TF	Factor: EGR1; motif: NGNGKGGGYGGNGS; match class: 0	TF:M09761_0	0.0011497977409313936	2040	531	216	6295	ENSG00000004059,ENSG00000005022,ENSG00000005302,ENSG00000007402,ENSG00000007866,ENSG00000022267,ENSG00000031698,ENSG00000038532,ENSG00000044446,ENSG00000047230,ENSG00000048028,ENSG00000056277,ENSG00000063241,ENSG00000063601,ENSG00000063660,ENSG00000068366,ENSG00000070718,ENSG00000070770,ENSG00000071127,ENSG00000072062,ENSG00000072682,ENSG00000072786,ENSG00000076043,ENSG00000076706,ENSG00000076716…
174	rna	positive	TF	Factor: EGR1; motif: NGNGKGGGYGGNGS	TF:M09761	0.0011497977409313936	2040	531	216	6295	ENSG00000004059,ENSG00000005022,ENSG00000005302,ENSG00000007402,ENSG00000007866,ENSG00000022267,ENSG00000031698,ENSG00000038532,ENSG00000044446,ENSG00000047230,ENSG00000048028,ENSG00000056277,ENSG00000063241,ENSG00000063601,ENSG00000063660,ENSG00000068366,ENSG00000070718,ENSG00000070770,ENSG00000071127,ENSG00000072062,ENSG00000072682,ENSG00000072786,ENSG00000076043,ENSG00000076706,ENSG00000076716…
175	rna	positive	TF	Factor: C-JUN:FRA-2; motif: NNRTGAGTCAYN; match class: 0	TF:M08940_0	0.0011497977409313936	1035	531	123	6295	ENSG00000022267,ENSG00000034152,ENSG00000039523,ENSG00000042493,ENSG00000061273,ENSG00000065833,ENSG00000067225,ENSG00000068323,ENSG00000068366,ENSG00000068394,ENSG00000072786,ENSG00000076043,ENSG00000077150,ENSG00000077274,ENSG00000087842,ENSG00000096060,ENSG00000096080,ENSG00000101868,ENSG00000101871,ENSG00000101935,ENSG00000101966,ENSG00000102054,ENSG00000102225,ENSG00000102230,ENSG00000102858…
176	rna	positive	TF	Factor: C-JUN:FRA-2; motif: NNRTGAGTCAYN	TF:M08940	0.0011497977409313936	1035	531	123	6295	ENSG00000022267,ENSG00000034152,ENSG00000039523,ENSG00000042493,ENSG00000061273,ENSG00000065833,ENSG00000067225,ENSG00000068323,ENSG00000068366,ENSG00000068394,ENSG00000072786,ENSG00000076043,ENSG00000077150,ENSG00000077274,ENSG00000087842,ENSG00000096060,ENSG00000096080,ENSG00000101868,ENSG00000101871,ENSG00000101935,ENSG00000101966,ENSG00000102054,ENSG00000102225,ENSG00000102230,ENSG00000102858…
177	rna	positive	TF	Factor: Egr-1; motif: GCGGGGGCGG; match class: 0	TF:M01873_0	0.0012009912956581687	2718	531	275	6295	ENSG00000004059,ENSG00000005022,ENSG00000005302,ENSG00000006757,ENSG00000007402,ENSG00000007866,ENSG00000018610,ENSG00000022267,ENSG00000029993,ENSG00000044446,ENSG00000047230,ENSG00000048028,ENSG00000055483,ENSG00000056277,ENSG00000056998,ENSG00000061273,ENSG00000063241,ENSG00000063601,ENSG00000063660,ENSG00000066629,ENSG00000067113,ENSG00000068323,ENSG00000068366,ENSG00000068394,ENSG00000068400…
178	rna	positive	TF	Factor: Egr-1; motif: GCGGGGGCGG	TF:M01873	0.0012009912956581687	2718	531	275	6295	ENSG00000004059,ENSG00000005022,ENSG00000005302,ENSG00000006757,ENSG00000007402,ENSG00000007866,ENSG00000018610,ENSG00000022267,ENSG00000029993,ENSG00000044446,ENSG00000047230,ENSG00000048028,ENSG00000055483,ENSG00000056277,ENSG00000056998,ENSG00000061273,ENSG00000063241,ENSG00000063601,ENSG00000063660,ENSG00000066629,ENSG00000067113,ENSG00000068323,ENSG00000068366,ENSG00000068394,ENSG00000068400…
179	rna	positive	TF	Factor: EGR1; motif: NCNCCGCCCCCGCN; match class: 1	TF:M07208_1	0.0012009912956581687	893	531	109	6295	ENSG00000005022,ENSG00000005302,ENSG00000007402,ENSG00000007866,ENSG00000048028,ENSG00000056277,ENSG00000063601,ENSG00000063660,ENSG00000071127,ENSG00000072062,ENSG00000072786,ENSG00000076043,ENSG00000077150,ENSG00000088305,ENSG00000088808,ENSG00000089159,ENSG00000100092,ENSG00000100097,ENSG00000101966,ENSG00000102054,ENSG00000102096,ENSG00000102119,ENSG00000102178,ENSG00000102858,ENSG00000103187…
180	rna	positive	TF	Factor: GKLF; motif: NNNRGGNGNGGSN	TF:M07289	0.0012628816557594983	5063	531	462	6295	ENSG00000004059,ENSG00000004961,ENSG00000005022,ENSG00000005302,ENSG00000006757,ENSG00000007402,ENSG00000007866,ENSG00000014216,ENSG00000018610,ENSG00000019582,ENSG00000022267,ENSG00000024422,ENSG00000029993,ENSG00000031698,ENSG00000034152,ENSG00000038532,ENSG00000039523,ENSG00000042493,ENSG00000044446,ENSG00000046647,ENSG00000046653,ENSG00000048028,ENSG00000052344,ENSG00000055483,ENSG00000056277…
181	rna	positive	TF	Factor: SP1; motif: CCCCKCCCCC	TF:M02281	0.0012628816557594983	2569	531	262	6295	ENSG00000004059,ENSG00000005302,ENSG00000007402,ENSG00000007866,ENSG00000014216,ENSG00000018610,ENSG00000029993,ENSG00000039523,ENSG00000042493,ENSG00000044446,ENSG00000048028,ENSG00000056277,ENSG00000056998,ENSG00000061273,ENSG00000063241,ENSG00000063601,ENSG00000063660,ENSG00000067225,ENSG00000068323,ENSG00000068400,ENSG00000070718,ENSG00000071127,ENSG00000071282,ENSG00000072062,ENSG00000072506…
182	rna	positive	TF	Factor: SP1; motif: CCCCKCCCCC; match class: 0	TF:M02281_0	0.0012628816557594983	2569	531	262	6295	ENSG00000004059,ENSG00000005302,ENSG00000007402,ENSG00000007866,ENSG00000014216,ENSG00000018610,ENSG00000029993,ENSG00000039523,ENSG00000042493,ENSG00000044446,ENSG00000048028,ENSG00000056277,ENSG00000056998,ENSG00000061273,ENSG00000063241,ENSG00000063601,ENSG00000063660,ENSG00000067225,ENSG00000068323,ENSG00000068400,ENSG00000070718,ENSG00000071127,ENSG00000071282,ENSG00000072062,ENSG00000072506…
183	rna	positive	TF	Factor: GKLF; motif: NNNRGGNGNGGSN; match class: 0	TF:M07289_0	0.0012628816557594983	5063	531	462	6295	ENSG00000004059,ENSG00000004961,ENSG00000005022,ENSG00000005302,ENSG00000006757,ENSG00000007402,ENSG00000007866,ENSG00000014216,ENSG00000018610,ENSG00000019582,ENSG00000022267,ENSG00000024422,ENSG00000029993,ENSG00000031698,ENSG00000034152,ENSG00000038532,ENSG00000039523,ENSG00000042493,ENSG00000044446,ENSG00000046647,ENSG00000046653,ENSG00000048028,ENSG00000052344,ENSG00000055483,ENSG00000056277…
184	rna	positive	TF	Factor: ZNF511; motif: GGRRGRGGCWGNG; match class: 1	TF:M09738_1	0.0014086211312740998	1594	531	175	6295	ENSG00000004059,ENSG00000005302,ENSG00000014216,ENSG00000024422,ENSG00000029993,ENSG00000048028,ENSG00000055483,ENSG00000056998,ENSG00000061273,ENSG00000069869,ENSG00000070770,ENSG00000071282,ENSG00000071859,ENSG00000072062,ENSG00000072682,ENSG00000075624,ENSG00000076706,ENSG00000077150,ENSG00000077721,ENSG00000082458,ENSG00000083444,ENSG00000086712,ENSG00000088305,ENSG00000089159,ENSG00000096717…
185	rna	positive	TF	Factor: MOVO-B; motif: GNGGGGG	TF:M01104	0.0015829300016986295	3998	531	380	6295	ENSG00000004059,ENSG00000004961,ENSG00000005022,ENSG00000005302,ENSG00000007402,ENSG00000007866,ENSG00000014216,ENSG00000018610,ENSG00000019582,ENSG00000022267,ENSG00000024422,ENSG00000034152,ENSG00000038532,ENSG00000039523,ENSG00000042493,ENSG00000044446,ENSG00000046651,ENSG00000046653,ENSG00000047230,ENSG00000048028,ENSG00000055483,ENSG00000056277,ENSG00000056998,ENSG00000061273,ENSG00000063241…
186	rna	positive	TF	Factor: MOVO-B; motif: GNGGGGG; match class: 0	TF:M01104_0	0.0015829300016986295	3998	531	380	6295	ENSG00000004059,ENSG00000004961,ENSG00000005022,ENSG00000005302,ENSG00000007402,ENSG00000007866,ENSG00000014216,ENSG00000018610,ENSG00000019582,ENSG00000022267,ENSG00000024422,ENSG00000034152,ENSG00000038532,ENSG00000039523,ENSG00000042493,ENSG00000044446,ENSG00000046651,ENSG00000046653,ENSG00000047230,ENSG00000048028,ENSG00000055483,ENSG00000056277,ENSG00000056998,ENSG00000061273,ENSG00000063241…
187	rna	positive	TF	Factor: SP1:SP3; motif: CCSCCCCCYCC; match class: 1	TF:M01219_1	0.0016303045680078046	1233	531	141	6295	ENSG00000004059,ENSG00000005302,ENSG00000007402,ENSG00000007866,ENSG00000029993,ENSG00000048028,ENSG00000061273,ENSG00000063241,ENSG00000063660,ENSG00000068323,ENSG00000070770,ENSG00000071282,ENSG00000072786,ENSG00000076716,ENSG00000076944,ENSG00000077150,ENSG00000078808,ENSG00000082458,ENSG00000088305,ENSG00000088808,ENSG00000089159,ENSG00000095380,ENSG00000100092,ENSG00000100097,ENSG00000101972…
188	rna	positive	TF	Factor: NR1B2; motif: NTGACCY; match class: 1	TF:M02111_1	0.0016609002896888249	1045	531	123	6295	ENSG00000004059,ENSG00000005022,ENSG00000007402,ENSG00000024422,ENSG00000042493,ENSG00000063660,ENSG00000065833,ENSG00000067225,ENSG00000068394,ENSG00000070770,ENSG00000072062,ENSG00000072506,ENSG00000072682,ENSG00000076043,ENSG00000077150,ENSG00000088808,ENSG00000089159,ENSG00000092820,ENSG00000096717,ENSG00000101160,ENSG00000101246,ENSG00000101421,ENSG00000101849,ENSG00000103111,ENSG00000104518…
189	rna	positive	TF	Factor: LUMAN; motif: CYCAGCYYCY; match class: 1	TF:M09729_1	0.001763524593859676	1417	531	158	6295	ENSG00000003509,ENSG00000007402,ENSG00000007866,ENSG00000014216,ENSG00000038532,ENSG00000039523,ENSG00000042493,ENSG00000047230,ENSG00000048028,ENSG00000056998,ENSG00000061273,ENSG00000063601,ENSG00000063660,ENSG00000067225,ENSG00000068323,ENSG00000068394,ENSG00000069869,ENSG00000070718,ENSG00000071127,ENSG00000071859,ENSG00000072062,ENSG00000072682,ENSG00000075624,ENSG00000076706,ENSG00000082458…
190	rna	positive	TF	Factor: Sp1; motif: NGGGGGCGGGGYN; match class: 1	TF:M00196_1	0.001763524593859676	2558	531	260	6295	ENSG00000004059,ENSG00000005022,ENSG00000005302,ENSG00000007402,ENSG00000007866,ENSG00000014216,ENSG00000022267,ENSG00000029993,ENSG00000034152,ENSG00000039523,ENSG00000044446,ENSG00000048028,ENSG00000055483,ENSG00000056998,ENSG00000061273,ENSG00000063241,ENSG00000063601,ENSG00000063660,ENSG00000067113,ENSG00000069869,ENSG00000070718,ENSG00000070770,ENSG00000071859,ENSG00000072062,ENSG00000072501…
191	rna	positive	TF	Factor: Egr-1; motif: CCGCCCMCG; match class: 1	TF:M04797_1	0.001763524593859676	672	531	86	6295	ENSG00000004059,ENSG00000005302,ENSG00000007402,ENSG00000044446,ENSG00000048028,ENSG00000056277,ENSG00000063660,ENSG00000072062,ENSG00000072786,ENSG00000083444,ENSG00000089159,ENSG00000100092,ENSG00000100417,ENSG00000101972,ENSG00000102098,ENSG00000102178,ENSG00000102221,ENSG00000103415,ENSG00000105321,ENSG00000107130,ENSG00000107372,ENSG00000107438,ENSG00000110880,ENSG00000111275,ENSG00000115652…
192	rna	positive	TF	Factor: JunD; motif: NRTGASTCATN; match class: 0	TF:M07104_0	0.0017766568610781605	712	531	90	6295	ENSG00000022267,ENSG00000061273,ENSG00000065833,ENSG00000067225,ENSG00000067992,ENSG00000068323,ENSG00000068366,ENSG00000068394,ENSG00000076043,ENSG00000077150,ENSG00000077274,ENSG00000096080,ENSG00000101421,ENSG00000101935,ENSG00000101966,ENSG00000102054,ENSG00000102271,ENSG00000103187,ENSG00000105767,ENSG00000106077,ENSG00000106397,ENSG00000107130,ENSG00000108821,ENSG00000110651,ENSG00000111275…
193	rna	positive	TF	Factor: JunD; motif: NRTGASTCATN	TF:M07104	0.0017766568610781605	712	531	90	6295	ENSG00000022267,ENSG00000061273,ENSG00000065833,ENSG00000067225,ENSG00000067992,ENSG00000068323,ENSG00000068366,ENSG00000068394,ENSG00000076043,ENSG00000077150,ENSG00000077274,ENSG00000096080,ENSG00000101421,ENSG00000101935,ENSG00000101966,ENSG00000102054,ENSG00000102271,ENSG00000103187,ENSG00000105767,ENSG00000106077,ENSG00000106397,ENSG00000107130,ENSG00000108821,ENSG00000110651,ENSG00000111275…
194	rna	positive	TF	Factor: KLF16; motif: GMCACGCCCCC; match class: 0	TF:M03914_0	0.0017957427650618816	1386	531	155	6295	ENSG00000004059,ENSG00000007866,ENSG00000014216,ENSG00000048028,ENSG00000063241,ENSG00000071127,ENSG00000071282,ENSG00000072506,ENSG00000075624,ENSG00000076944,ENSG00000077721,ENSG00000086712,ENSG00000088305,ENSG00000088808,ENSG00000089159,ENSG00000095380,ENSG00000100097,ENSG00000100417,ENSG00000101335,ENSG00000102024,ENSG00000102038,ENSG00000102054,ENSG00000102098,ENSG00000102103,ENSG00000102119…
195	rna	positive	TF	Factor: KLF16; motif: GMCACGCCCCC	TF:M03914	0.0017957427650618816	1386	531	155	6295	ENSG00000004059,ENSG00000007866,ENSG00000014216,ENSG00000048028,ENSG00000063241,ENSG00000071127,ENSG00000071282,ENSG00000072506,ENSG00000075624,ENSG00000076944,ENSG00000077721,ENSG00000086712,ENSG00000088305,ENSG00000088808,ENSG00000089159,ENSG00000095380,ENSG00000100097,ENSG00000100417,ENSG00000101335,ENSG00000102024,ENSG00000102038,ENSG00000102054,ENSG00000102098,ENSG00000102103,ENSG00000102119…
196	rna	positive	TF	Factor: RREB-1; motif: CCCCAAACMMCCCC; match class: 1	TF:M00257_1	0.001810352738963216	1419	531	158	6295	ENSG00000004961,ENSG00000006757,ENSG00000007402,ENSG00000007866,ENSG00000014216,ENSG00000031698,ENSG00000046653,ENSG00000055483,ENSG00000056998,ENSG00000058668,ENSG00000061273,ENSG00000063601,ENSG00000063660,ENSG00000067225,ENSG00000068323,ENSG00000068400,ENSG00000070770,ENSG00000072786,ENSG00000075624,ENSG00000076043,ENSG00000076716,ENSG00000077150,ENSG00000077274,ENSG00000082458,ENSG00000086712…
197	rna	positive	TF	Factor: c-Jun; motif: NNNNRRTGASTCAN; match class: 0	TF:M07102_0	0.001810352738963216	1452	531	161	6295	ENSG00000004961,ENSG00000021826,ENSG00000022267,ENSG00000034152,ENSG00000039523,ENSG00000042493,ENSG00000061273,ENSG00000065833,ENSG00000067225,ENSG00000067992,ENSG00000068323,ENSG00000068366,ENSG00000068394,ENSG00000072786,ENSG00000076043,ENSG00000076944,ENSG00000077150,ENSG00000077274,ENSG00000087842,ENSG00000096060,ENSG00000096080,ENSG00000101421,ENSG00000101868,ENSG00000101871,ENSG00000101935…
198	rna	positive	TF	Factor: SMAD5; motif: GSGGCAGM; match class: 1	TF:M03846_1	0.001810352738963216	734	531	92	6295	ENSG00000004961,ENSG00000005022,ENSG00000005302,ENSG00000007402,ENSG00000019582,ENSG00000046647,ENSG00000052344,ENSG00000056998,ENSG00000061273,ENSG00000068366,ENSG00000071127,ENSG00000071859,ENSG00000072682,ENSG00000076706,ENSG00000076716,ENSG00000096080,ENSG00000096717,ENSG00000099246,ENSG00000100092,ENSG00000100097,ENSG00000101811,ENSG00000101911,ENSG00000102024,ENSG00000102054,ENSG00000102316…
199	rna	positive	TF	Factor: c-Jun; motif: NNNNRRTGASTCAN	TF:M07102	0.001810352738963216	1452	531	161	6295	ENSG00000004961,ENSG00000021826,ENSG00000022267,ENSG00000034152,ENSG00000039523,ENSG00000042493,ENSG00000061273,ENSG00000065833,ENSG00000067225,ENSG00000067992,ENSG00000068323,ENSG00000068366,ENSG00000068394,ENSG00000072786,ENSG00000076043,ENSG00000076944,ENSG00000077150,ENSG00000077274,ENSG00000087842,ENSG00000096060,ENSG00000096080,ENSG00000101421,ENSG00000101868,ENSG00000101871,ENSG00000101935…
200	rna	positive	TF	Factor: EGR1; motif: NACGCCCACGCANW; match class: 0	TF:M03896_0	0.001810352738963216	2422	531	248	6295	ENSG00000003509,ENSG00000004059,ENSG00000005022,ENSG00000005302,ENSG00000007402,ENSG00000007866,ENSG00000018610,ENSG00000022267,ENSG00000031698,ENSG00000034152,ENSG00000044446,ENSG00000047230,ENSG00000048028,ENSG00000055483,ENSG00000056277,ENSG00000056998,ENSG00000058668,ENSG00000063241,ENSG00000063601,ENSG00000063660,ENSG00000066629,ENSG00000068323,ENSG00000068366,ENSG00000069869,ENSG00000070770…
201	rna	positive	TF	Factor: LUMAN; motif: CYCAGCYYCY	TF:M09729	0.001810352738963216	3439	531	334	6295	ENSG00000003509,ENSG00000004961,ENSG00000005302,ENSG00000007402,ENSG00000007866,ENSG00000014216,ENSG00000022267,ENSG00000029993,ENSG00000038532,ENSG00000039523,ENSG00000042493,ENSG00000044446,ENSG00000047230,ENSG00000048028,ENSG00000056998,ENSG00000058668,ENSG00000061273,ENSG00000063601,ENSG00000063660,ENSG00000066629,ENSG00000067225,ENSG00000067992,ENSG00000068323,ENSG00000068394,ENSG00000069869…
202	rna	positive	TF	Factor: EGR1; motif: NACGCCCACGCANW	TF:M03896	0.001810352738963216	2422	531	248	6295	ENSG00000003509,ENSG00000004059,ENSG00000005022,ENSG00000005302,ENSG00000007402,ENSG00000007866,ENSG00000018610,ENSG00000022267,ENSG00000031698,ENSG00000034152,ENSG00000044446,ENSG00000047230,ENSG00000048028,ENSG00000055483,ENSG00000056277,ENSG00000056998,ENSG00000058668,ENSG00000063241,ENSG00000063601,ENSG00000063660,ENSG00000066629,ENSG00000068323,ENSG00000068366,ENSG00000069869,ENSG00000070770…
203	rna	positive	TF	Factor: Gli2; motif: NTGGGTGGTCNN; match class: 0	TF:M07455_0	0.001810352738963216	885	531	107	6295	ENSG00000003509,ENSG00000014216,ENSG00000031698,ENSG00000038532,ENSG00000052344,ENSG00000058668,ENSG00000061273,ENSG00000065833,ENSG00000068366,ENSG00000068400,ENSG00000070718,ENSG00000072786,ENSG00000076043,ENSG00000076706,ENSG00000077150,ENSG00000083444,ENSG00000089159,ENSG00000095380,ENSG00000100092,ENSG00000100097,ENSG00000100417,ENSG00000101882,ENSG00000101911,ENSG00000101972,ENSG00000102038…
204	rna	positive	TF	Factor: Gli2; motif: NTGGGTGGTCNN	TF:M07455	0.001810352738963216	885	531	107	6295	ENSG00000003509,ENSG00000014216,ENSG00000031698,ENSG00000038532,ENSG00000052344,ENSG00000058668,ENSG00000061273,ENSG00000065833,ENSG00000068366,ENSG00000068400,ENSG00000070718,ENSG00000072786,ENSG00000076043,ENSG00000076706,ENSG00000077150,ENSG00000083444,ENSG00000089159,ENSG00000095380,ENSG00000100092,ENSG00000100097,ENSG00000100417,ENSG00000101882,ENSG00000101911,ENSG00000101972,ENSG00000102038…
205	rna	positive	TF	Factor: LUMAN; motif: CYCAGCYYCY; match class: 0	TF:M09729_0	0.001810352738963216	3439	531	334	6295	ENSG00000003509,ENSG00000004961,ENSG00000005302,ENSG00000007402,ENSG00000007866,ENSG00000014216,ENSG00000022267,ENSG00000029993,ENSG00000038532,ENSG00000039523,ENSG00000042493,ENSG00000044446,ENSG00000047230,ENSG00000048028,ENSG00000056998,ENSG00000058668,ENSG00000061273,ENSG00000063601,ENSG00000063660,ENSG00000066629,ENSG00000067225,ENSG00000067992,ENSG00000068323,ENSG00000068394,ENSG00000069869…
206	rna	positive	TF	Factor: WT1; motif: SMCNCCNSC; match class: 0	TF:M01118_0	0.001810352738963216	2493	531	254	6295	ENSG00000004961,ENSG00000005302,ENSG00000006757,ENSG00000007402,ENSG00000007866,ENSG00000014216,ENSG00000018610,ENSG00000019582,ENSG00000022267,ENSG00000034152,ENSG00000039523,ENSG00000055483,ENSG00000056277,ENSG00000056998,ENSG00000061273,ENSG00000063660,ENSG00000067113,ENSG00000067225,ENSG00000068323,ENSG00000068366,ENSG00000068394,ENSG00000068400,ENSG00000070770,ENSG00000071127,ENSG00000071282…
207	rna	positive	TF	Factor: WT1; motif: SMCNCCNSC	TF:M01118	0.001810352738963216	2493	531	254	6295	ENSG00000004961,ENSG00000005302,ENSG00000006757,ENSG00000007402,ENSG00000007866,ENSG00000014216,ENSG00000018610,ENSG00000019582,ENSG00000022267,ENSG00000034152,ENSG00000039523,ENSG00000055483,ENSG00000056277,ENSG00000056998,ENSG00000061273,ENSG00000063660,ENSG00000067113,ENSG00000067225,ENSG00000068323,ENSG00000068366,ENSG00000068394,ENSG00000068400,ENSG00000070770,ENSG00000071127,ENSG00000071282…
208	rna	positive	TF	Factor: Sp1; motif: NGGGGCGGGGN	TF:M07395	0.0018661702572083808	4338	531	406	6295	ENSG00000004059,ENSG00000004961,ENSG00000005022,ENSG00000005302,ENSG00000007402,ENSG00000007866,ENSG00000014216,ENSG00000018610,ENSG00000019582,ENSG00000022267,ENSG00000024422,ENSG00000029993,ENSG00000031698,ENSG00000034152,ENSG00000038532,ENSG00000039523,ENSG00000042493,ENSG00000044446,ENSG00000046647,ENSG00000046651,ENSG00000046653,ENSG00000048028,ENSG00000052344,ENSG00000055483,ENSG00000056277…
209	rna	positive	TF	Factor: Sp1; motif: NGGGGCGGGGN; match class: 0	TF:M07395_0	0.0018661702572083808	4338	531	406	6295	ENSG00000004059,ENSG00000004961,ENSG00000005022,ENSG00000005302,ENSG00000007402,ENSG00000007866,ENSG00000014216,ENSG00000018610,ENSG00000019582,ENSG00000022267,ENSG00000024422,ENSG00000029993,ENSG00000031698,ENSG00000034152,ENSG00000038532,ENSG00000039523,ENSG00000042493,ENSG00000044446,ENSG00000046647,ENSG00000046651,ENSG00000046653,ENSG00000048028,ENSG00000052344,ENSG00000055483,ENSG00000056277…
210	rna	positive	TF	Factor: GKLF; motif: CCTCCYN; match class: 1	TF:M01835_1	0.0018661702572083808	3212	531	315	6295	ENSG00000003509,ENSG00000004059,ENSG00000004961,ENSG00000005302,ENSG00000007402,ENSG00000007866,ENSG00000014216,ENSG00000018610,ENSG00000022267,ENSG00000024422,ENSG00000031698,ENSG00000034152,ENSG00000039523,ENSG00000042493,ENSG00000044446,ENSG00000046647,ENSG00000047230,ENSG00000048028,ENSG00000052344,ENSG00000055483,ENSG00000056277,ENSG00000056998,ENSG00000061273,ENSG00000067113,ENSG00000067225…
211	rna	positive	TF	Factor: Egr-1; motif: ACCGCCC; match class: 0	TF:M04918_0	0.0019046007031122013	2289	531	236	6295	ENSG00000006757,ENSG00000007402,ENSG00000007866,ENSG00000022267,ENSG00000024422,ENSG00000029993,ENSG00000039523,ENSG00000044446,ENSG00000046647,ENSG00000046651,ENSG00000047230,ENSG00000055483,ENSG00000056277,ENSG00000061273,ENSG00000063241,ENSG00000063601,ENSG00000063660,ENSG00000067225,ENSG00000068323,ENSG00000068394,ENSG00000070718,ENSG00000070770,ENSG00000071127,ENSG00000071859,ENSG00000072506…
212	rna	positive	TF	Factor: Egr-1; motif: ACCGCCC	TF:M04918	0.0019046007031122013	2289	531	236	6295	ENSG00000006757,ENSG00000007402,ENSG00000007866,ENSG00000022267,ENSG00000024422,ENSG00000029993,ENSG00000039523,ENSG00000044446,ENSG00000046647,ENSG00000046651,ENSG00000047230,ENSG00000055483,ENSG00000056277,ENSG00000061273,ENSG00000063241,ENSG00000063601,ENSG00000063660,ENSG00000067225,ENSG00000068323,ENSG00000068394,ENSG00000070718,ENSG00000070770,ENSG00000071127,ENSG00000071859,ENSG00000072506…
213	rna	positive	TF	Factor: Sp3; motif: GGGGCGGGGSNN; match class: 1	TF:M07615_1	0.0019315035090271254	1284	531	145	6295	ENSG00000005302,ENSG00000007866,ENSG00000022267,ENSG00000029993,ENSG00000044446,ENSG00000048028,ENSG00000055483,ENSG00000056998,ENSG00000061273,ENSG00000063660,ENSG00000070718,ENSG00000070770,ENSG00000071859,ENSG00000072062,ENSG00000075624,ENSG00000076706,ENSG00000077721,ENSG00000086712,ENSG00000088305,ENSG00000088808,ENSG00000089159,ENSG00000095380,ENSG00000100097,ENSG00000100417,ENSG00000101335…
214	rna	positive	TF	Factor: Sp1; motif: GGGGCGGGGC; match class: 0	TF:M00931_0	0.0019495678227596535	4162	531	392	6295	ENSG00000004059,ENSG00000005022,ENSG00000005302,ENSG00000007402,ENSG00000007866,ENSG00000014216,ENSG00000018610,ENSG00000019582,ENSG00000022267,ENSG00000024422,ENSG00000029993,ENSG00000034152,ENSG00000038532,ENSG00000039523,ENSG00000042493,ENSG00000044446,ENSG00000046647,ENSG00000046651,ENSG00000046653,ENSG00000048028,ENSG00000052344,ENSG00000055483,ENSG00000056277,ENSG00000056998,ENSG00000058668…
215	rna	positive	TF	Factor: Sp1; motif: GGGGCGGGGC	TF:M00931	0.0019495678227596535	4162	531	392	6295	ENSG00000004059,ENSG00000005022,ENSG00000005302,ENSG00000007402,ENSG00000007866,ENSG00000014216,ENSG00000018610,ENSG00000019582,ENSG00000022267,ENSG00000024422,ENSG00000029993,ENSG00000034152,ENSG00000038532,ENSG00000039523,ENSG00000042493,ENSG00000044446,ENSG00000046647,ENSG00000046651,ENSG00000046653,ENSG00000048028,ENSG00000052344,ENSG00000055483,ENSG00000056277,ENSG00000056998,ENSG00000058668…
216	rna	positive	TF	Factor: CP2; motif: NNNNCCAGNCNN; match class: 1	TF:M07602_1	0.0020444264582243333	1436	531	159	6295	ENSG00000003509,ENSG00000004059,ENSG00000005022,ENSG00000007866,ENSG00000019582,ENSG00000024422,ENSG00000039523,ENSG00000061273,ENSG00000063241,ENSG00000063601,ENSG00000065833,ENSG00000068394,ENSG00000071859,ENSG00000072062,ENSG00000072501,ENSG00000072682,ENSG00000072786,ENSG00000075624,ENSG00000076706,ENSG00000082458,ENSG00000086712,ENSG00000088305,ENSG00000092820,ENSG00000096060,ENSG00000099940…
217	rna	positive	TF	Factor: AP-2gamma; motif: GCCYNNGGS; match class: 0	TF:M00470_0	0.002077602496193075	3422	531	332	6295	ENSG00000004059,ENSG00000004961,ENSG00000005022,ENSG00000005302,ENSG00000006757,ENSG00000007402,ENSG00000007866,ENSG00000014216,ENSG00000019582,ENSG00000022267,ENSG00000029993,ENSG00000031698,ENSG00000039523,ENSG00000044446,ENSG00000046647,ENSG00000047230,ENSG00000048028,ENSG00000052344,ENSG00000055483,ENSG00000056998,ENSG00000061273,ENSG00000063241,ENSG00000063601,ENSG00000063660,ENSG00000065833…
218	rna	positive	TF	Factor: AP-2gamma; motif: GCCYNNGGS	TF:M00470	0.002077602496193075	3422	531	332	6295	ENSG00000004059,ENSG00000004961,ENSG00000005022,ENSG00000005302,ENSG00000006757,ENSG00000007402,ENSG00000007866,ENSG00000014216,ENSG00000019582,ENSG00000022267,ENSG00000029993,ENSG00000031698,ENSG00000039523,ENSG00000044446,ENSG00000046647,ENSG00000047230,ENSG00000048028,ENSG00000052344,ENSG00000055483,ENSG00000056998,ENSG00000061273,ENSG00000063241,ENSG00000063601,ENSG00000063660,ENSG00000065833…
219	rna	positive	TF	Factor: PLAG1; motif: CCCCCKWNNNGGSCCC; match class: 0	TF:M01973_0	0.002153704071147998	2260	531	233	6295	ENSG00000004059,ENSG00000005302,ENSG00000006757,ENSG00000007402,ENSG00000007866,ENSG00000014216,ENSG00000022267,ENSG00000024422,ENSG00000034152,ENSG00000038532,ENSG00000039523,ENSG00000044446,ENSG00000052344,ENSG00000055483,ENSG00000056277,ENSG00000056998,ENSG00000058668,ENSG00000061273,ENSG00000063601,ENSG00000063660,ENSG00000070718,ENSG00000071127,ENSG00000071282,ENSG00000072062,ENSG00000072501…
220	rna	positive	TF	Factor: PLAG1; motif: CCCCCKWNNNGGSCCC	TF:M01973	0.002153704071147998	2260	531	233	6295	ENSG00000004059,ENSG00000005302,ENSG00000006757,ENSG00000007402,ENSG00000007866,ENSG00000014216,ENSG00000022267,ENSG00000024422,ENSG00000034152,ENSG00000038532,ENSG00000039523,ENSG00000044446,ENSG00000052344,ENSG00000055483,ENSG00000056277,ENSG00000056998,ENSG00000058668,ENSG00000061273,ENSG00000063601,ENSG00000063660,ENSG00000070718,ENSG00000071127,ENSG00000071282,ENSG00000072062,ENSG00000072501…
221	rna	positive	TF	Factor: ZBP89; motif: CCCCKCCCCCNN; match class: 1	TF:M07397_1	0.0021791067282970963	1235	531	140	6295	ENSG00000005302,ENSG00000007866,ENSG00000048028,ENSG00000056277,ENSG00000063241,ENSG00000063660,ENSG00000068400,ENSG00000071127,ENSG00000071282,ENSG00000072062,ENSG00000072786,ENSG00000076043,ENSG00000076706,ENSG00000077150,ENSG00000077454,ENSG00000077721,ENSG00000086712,ENSG00000088305,ENSG00000088808,ENSG00000089159,ENSG00000095380,ENSG00000100092,ENSG00000100097,ENSG00000100417,ENSG00000101966…
222	rna	positive	TF	Factor: TORC2; motif: TGGGCTKKD	TF:M07341	0.0022289407313894147	1375	531	153	6295	ENSG00000003509,ENSG00000004059,ENSG00000005022,ENSG00000014216,ENSG00000018610,ENSG00000019582,ENSG00000038532,ENSG00000039523,ENSG00000058668,ENSG00000061273,ENSG00000063241,ENSG00000067225,ENSG00000067992,ENSG00000068323,ENSG00000068400,ENSG00000071127,ENSG00000072501,ENSG00000075624,ENSG00000077274,ENSG00000078808,ENSG00000082458,ENSG00000083444,ENSG00000086712,ENSG00000095637,ENSG00000096717…
223	rna	positive	TF	Factor: Gli3; motif: STGGGTGGYCY	TF:M01596	0.0022289407313894147	661	531	84	6295	ENSG00000014216,ENSG00000031698,ENSG00000038532,ENSG00000058668,ENSG00000061273,ENSG00000065833,ENSG00000068366,ENSG00000068400,ENSG00000070718,ENSG00000072786,ENSG00000076043,ENSG00000076706,ENSG00000077150,ENSG00000083444,ENSG00000095380,ENSG00000100092,ENSG00000100097,ENSG00000100417,ENSG00000101882,ENSG00000101911,ENSG00000101972,ENSG00000102038,ENSG00000102103,ENSG00000102119,ENSG00000105088…
224	rna	positive	TF	Factor: Gli3; motif: STGGGTGGYCY; match class: 0	TF:M01596_0	0.0022289407313894147	661	531	84	6295	ENSG00000014216,ENSG00000031698,ENSG00000038532,ENSG00000058668,ENSG00000061273,ENSG00000065833,ENSG00000068366,ENSG00000068400,ENSG00000070718,ENSG00000072786,ENSG00000076043,ENSG00000076706,ENSG00000077150,ENSG00000083444,ENSG00000095380,ENSG00000100092,ENSG00000100097,ENSG00000100417,ENSG00000101882,ENSG00000101911,ENSG00000101972,ENSG00000102038,ENSG00000102103,ENSG00000102119,ENSG00000105088…
225	rna	positive	TF	Factor: TORC2; motif: TGGGCTKKD; match class: 0	TF:M07341_0	0.0022289407313894147	1375	531	153	6295	ENSG00000003509,ENSG00000004059,ENSG00000005022,ENSG00000014216,ENSG00000018610,ENSG00000019582,ENSG00000038532,ENSG00000039523,ENSG00000058668,ENSG00000061273,ENSG00000063241,ENSG00000067225,ENSG00000067992,ENSG00000068323,ENSG00000068400,ENSG00000071127,ENSG00000072501,ENSG00000075624,ENSG00000077274,ENSG00000078808,ENSG00000082458,ENSG00000083444,ENSG00000086712,ENSG00000095637,ENSG00000096717…
226	rna	positive	TF	Factor: Sp1; motif: GGNDGGRGGCGGGG	TF:M04953	0.0022289407313894147	3269	531	319	6295	ENSG00000004059,ENSG00000004961,ENSG00000005022,ENSG00000005302,ENSG00000007402,ENSG00000007866,ENSG00000014216,ENSG00000024422,ENSG00000029993,ENSG00000031698,ENSG00000039523,ENSG00000042493,ENSG00000044446,ENSG00000046653,ENSG00000048028,ENSG00000056277,ENSG00000056998,ENSG00000058668,ENSG00000061273,ENSG00000063241,ENSG00000063601,ENSG00000063660,ENSG00000065833,ENSG00000066629,ENSG00000067225…
227	rna	positive	TF	Factor: Sp1; motif: GGNDGGRGGCGGGG; match class: 0	TF:M04953_0	0.0022289407313894147	3269	531	319	6295	ENSG00000004059,ENSG00000004961,ENSG00000005022,ENSG00000005302,ENSG00000007402,ENSG00000007866,ENSG00000014216,ENSG00000024422,ENSG00000029993,ENSG00000031698,ENSG00000039523,ENSG00000042493,ENSG00000044446,ENSG00000046653,ENSG00000048028,ENSG00000056277,ENSG00000056998,ENSG00000058668,ENSG00000061273,ENSG00000063241,ENSG00000063601,ENSG00000063660,ENSG00000065833,ENSG00000066629,ENSG00000067225…
228	rna	positive	TF	Factor: AP-2; motif: SNNNCCNCAGGCN	TF:M00915	0.0023877130114924165	3538	531	341	6295	ENSG00000004059,ENSG00000004961,ENSG00000005022,ENSG00000005302,ENSG00000007402,ENSG00000007866,ENSG00000014216,ENSG00000019582,ENSG00000022267,ENSG00000024422,ENSG00000029993,ENSG00000031698,ENSG00000039523,ENSG00000044446,ENSG00000046647,ENSG00000047230,ENSG00000048028,ENSG00000052344,ENSG00000055483,ENSG00000056277,ENSG00000056998,ENSG00000061273,ENSG00000063601,ENSG00000063660,ENSG00000065833…
229	rna	positive	TF	Factor: AP-2; motif: SNNNCCNCAGGCN; match class: 0	TF:M00915_0	0.0023877130114924165	3538	531	341	6295	ENSG00000004059,ENSG00000004961,ENSG00000005022,ENSG00000005302,ENSG00000007402,ENSG00000007866,ENSG00000014216,ENSG00000019582,ENSG00000022267,ENSG00000024422,ENSG00000029993,ENSG00000031698,ENSG00000039523,ENSG00000044446,ENSG00000046647,ENSG00000047230,ENSG00000048028,ENSG00000052344,ENSG00000055483,ENSG00000056277,ENSG00000056998,ENSG00000061273,ENSG00000063601,ENSG00000063660,ENSG00000065833…
230	rna	positive	TF	Factor: Sp1; motif: NGGGGGCGGGGYN; match class: 0	TF:M00196_0	0.002418454006562941	4197	531	394	6295	ENSG00000004059,ENSG00000004961,ENSG00000005022,ENSG00000005302,ENSG00000007402,ENSG00000007866,ENSG00000014216,ENSG00000018610,ENSG00000019582,ENSG00000022267,ENSG00000024422,ENSG00000029993,ENSG00000034152,ENSG00000038532,ENSG00000039523,ENSG00000042493,ENSG00000044446,ENSG00000046647,ENSG00000046651,ENSG00000048028,ENSG00000052344,ENSG00000055483,ENSG00000056277,ENSG00000056998,ENSG00000061273…
231	rna	positive	TF	Factor: Sp1; motif: NGGGGGCGGGGYN	TF:M00196	0.002418454006562941	4197	531	394	6295	ENSG00000004059,ENSG00000004961,ENSG00000005022,ENSG00000005302,ENSG00000007402,ENSG00000007866,ENSG00000014216,ENSG00000018610,ENSG00000019582,ENSG00000022267,ENSG00000024422,ENSG00000029993,ENSG00000034152,ENSG00000038532,ENSG00000039523,ENSG00000042493,ENSG00000044446,ENSG00000046647,ENSG00000046651,ENSG00000048028,ENSG00000052344,ENSG00000055483,ENSG00000056277,ENSG00000056998,ENSG00000061273…
232	rna	positive	TF	Factor: Sp2; motif: GGSNNGGGGGCGGGGCCNGNGS; match class: 0	TF:M09658_0	0.002474597142950292	2221	531	229	6295	ENSG00000004059,ENSG00000005022,ENSG00000005302,ENSG00000007402,ENSG00000007866,ENSG00000022267,ENSG00000029993,ENSG00000039523,ENSG00000044446,ENSG00000048028,ENSG00000052344,ENSG00000056998,ENSG00000063241,ENSG00000063601,ENSG00000063660,ENSG00000067113,ENSG00000070718,ENSG00000070770,ENSG00000071127,ENSG00000072786,ENSG00000075624,ENSG00000076043,ENSG00000076706,ENSG00000076716,ENSG00000076944…
233	rna	positive	TF	Factor: Sp2; motif: GGSNNGGGGGCGGGGCCNGNGS	TF:M09658	0.002474597142950292	2221	531	229	6295	ENSG00000004059,ENSG00000005022,ENSG00000005302,ENSG00000007402,ENSG00000007866,ENSG00000022267,ENSG00000029993,ENSG00000039523,ENSG00000044446,ENSG00000048028,ENSG00000052344,ENSG00000056998,ENSG00000063241,ENSG00000063601,ENSG00000063660,ENSG00000067113,ENSG00000070718,ENSG00000070770,ENSG00000071127,ENSG00000072786,ENSG00000075624,ENSG00000076043,ENSG00000076706,ENSG00000076716,ENSG00000076944…
234	rna	positive	TF	Factor: TF3C-beta; motif: CCNGGAGGGCTTCCTGGAGGAG; match class: 1	TF:M04863_1	0.0025816125353408164	3060	531	301	6295	ENSG00000003509,ENSG00000004059,ENSG00000005022,ENSG00000005302,ENSG00000006757,ENSG00000007866,ENSG00000014216,ENSG00000022267,ENSG00000029993,ENSG00000034152,ENSG00000039523,ENSG00000044446,ENSG00000047230,ENSG00000048028,ENSG00000055483,ENSG00000056998,ENSG00000061273,ENSG00000063241,ENSG00000063601,ENSG00000065833,ENSG00000066629,ENSG00000067225,ENSG00000068323,ENSG00000068394,ENSG00000068400…
235	rna	positive	TF	Factor: Egr-1; motif: NNNNNGYGKGGGNGGGNN; match class: 0	TF:M09603_0	0.0026067232830451017	1785	531	190	6295	ENSG00000004059,ENSG00000005302,ENSG00000007402,ENSG00000007866,ENSG00000014216,ENSG00000022267,ENSG00000031698,ENSG00000038532,ENSG00000044446,ENSG00000048028,ENSG00000056277,ENSG00000063601,ENSG00000067992,ENSG00000068366,ENSG00000070770,ENSG00000071127,ENSG00000072062,ENSG00000072682,ENSG00000072786,ENSG00000076043,ENSG00000076706,ENSG00000076716,ENSG00000077150,ENSG00000077721,ENSG00000078808…
236	rna	positive	TF	Factor: Egr-1; motif: NNNNNGYGKGGGNGGGNN	TF:M09603	0.0026067232830451017	1785	531	190	6295	ENSG00000004059,ENSG00000005302,ENSG00000007402,ENSG00000007866,ENSG00000014216,ENSG00000022267,ENSG00000031698,ENSG00000038532,ENSG00000044446,ENSG00000048028,ENSG00000056277,ENSG00000063601,ENSG00000067992,ENSG00000068366,ENSG00000070770,ENSG00000071127,ENSG00000072062,ENSG00000072682,ENSG00000072786,ENSG00000076043,ENSG00000076706,ENSG00000076716,ENSG00000077150,ENSG00000077721,ENSG00000078808…
237	rna	positive	TF	Factor: C-JUN:FOSB; motif: NATGACTCAY	TF:M08936	0.0026095546534564834	938	531	111	6295	ENSG00000034152,ENSG00000039523,ENSG00000042493,ENSG00000061273,ENSG00000065833,ENSG00000067225,ENSG00000068323,ENSG00000068394,ENSG00000072786,ENSG00000076043,ENSG00000077150,ENSG00000077274,ENSG00000087842,ENSG00000096080,ENSG00000101868,ENSG00000101935,ENSG00000101966,ENSG00000102054,ENSG00000102225,ENSG00000102230,ENSG00000102858,ENSG00000103187,ENSG00000105767,ENSG00000106397,ENSG00000107372…
238	rna	positive	TF	Factor: C-JUN:FOSB; motif: NATGACTCAY; match class: 0	TF:M08936_0	0.0026095546534564834	938	531	111	6295	ENSG00000034152,ENSG00000039523,ENSG00000042493,ENSG00000061273,ENSG00000065833,ENSG00000067225,ENSG00000068323,ENSG00000068394,ENSG00000072786,ENSG00000076043,ENSG00000077150,ENSG00000077274,ENSG00000087842,ENSG00000096080,ENSG00000101868,ENSG00000101935,ENSG00000101966,ENSG00000102054,ENSG00000102225,ENSG00000102230,ENSG00000102858,ENSG00000103187,ENSG00000105767,ENSG00000106397,ENSG00000107372…
239	rna	positive	TF	Factor: Fra-2; motif: NRRTGASTCAB; match class: 0	TF:M07092_0	0.002814532846045255	909	531	108	6295	ENSG00000034152,ENSG00000039523,ENSG00000042493,ENSG00000065833,ENSG00000067225,ENSG00000068323,ENSG00000068394,ENSG00000072786,ENSG00000076043,ENSG00000077150,ENSG00000077274,ENSG00000087842,ENSG00000096080,ENSG00000101868,ENSG00000101935,ENSG00000101966,ENSG00000102054,ENSG00000102225,ENSG00000102230,ENSG00000102858,ENSG00000103187,ENSG00000105767,ENSG00000106397,ENSG00000107372,ENSG00000108828…
240	rna	positive	TF	Factor: Fra-2; motif: NRRTGASTCAB	TF:M07092	0.002814532846045255	909	531	108	6295	ENSG00000034152,ENSG00000039523,ENSG00000042493,ENSG00000065833,ENSG00000067225,ENSG00000068323,ENSG00000068394,ENSG00000072786,ENSG00000076043,ENSG00000077150,ENSG00000077274,ENSG00000087842,ENSG00000096080,ENSG00000101868,ENSG00000101935,ENSG00000101966,ENSG00000102054,ENSG00000102225,ENSG00000102230,ENSG00000102858,ENSG00000103187,ENSG00000105767,ENSG00000106397,ENSG00000107372,ENSG00000108828…
241	rna	positive	TF	Factor: SP1; motif: NCCCCKCCCCC; match class: 1	TF:M07226_1	0.002857738987455777	1722	531	184	6295	ENSG00000005302,ENSG00000007866,ENSG00000014216,ENSG00000022267,ENSG00000029993,ENSG00000039523,ENSG00000044446,ENSG00000048028,ENSG00000056277,ENSG00000056998,ENSG00000061273,ENSG00000063241,ENSG00000063660,ENSG00000070718,ENSG00000070770,ENSG00000071127,ENSG00000071859,ENSG00000072062,ENSG00000076043,ENSG00000076706,ENSG00000077150,ENSG00000077721,ENSG00000086712,ENSG00000088305,ENSG00000088808…
242	rna	positive	TF	Factor: C-JUN:FRA-1; motif: NNATGACTCATNN; match class: 0	TF:M08938_0	0.0029485075805655504	1066	531	123	6295	ENSG00000034152,ENSG00000039523,ENSG00000042493,ENSG00000061273,ENSG00000065833,ENSG00000067225,ENSG00000068323,ENSG00000068394,ENSG00000072786,ENSG00000076043,ENSG00000077150,ENSG00000077274,ENSG00000087842,ENSG00000096060,ENSG00000096080,ENSG00000101868,ENSG00000101871,ENSG00000101935,ENSG00000101966,ENSG00000102054,ENSG00000102098,ENSG00000102225,ENSG00000102230,ENSG00000102858,ENSG00000103187…
243	rna	positive	TF	Factor: C-JUN:FRA-1; motif: NNATGACTCATNN	TF:M08938	0.0029485075805655504	1066	531	123	6295	ENSG00000034152,ENSG00000039523,ENSG00000042493,ENSG00000061273,ENSG00000065833,ENSG00000067225,ENSG00000068323,ENSG00000068394,ENSG00000072786,ENSG00000076043,ENSG00000077150,ENSG00000077274,ENSG00000087842,ENSG00000096060,ENSG00000096080,ENSG00000101868,ENSG00000101871,ENSG00000101935,ENSG00000101966,ENSG00000102054,ENSG00000102098,ENSG00000102225,ENSG00000102230,ENSG00000102858,ENSG00000103187…
244	rna	positive	TF	Factor: Sp3; motif: GGGGCGGGGSNN; match class: 0	TF:M07615_0	0.0032461535254442605	2833	531	281	6295	ENSG00000004059,ENSG00000005302,ENSG00000007402,ENSG00000007866,ENSG00000018610,ENSG00000019582,ENSG00000022267,ENSG00000029993,ENSG00000034152,ENSG00000039523,ENSG00000042493,ENSG00000044446,ENSG00000048028,ENSG00000055483,ENSG00000056277,ENSG00000056998,ENSG00000061273,ENSG00000063241,ENSG00000063601,ENSG00000063660,ENSG00000066629,ENSG00000067113,ENSG00000070718,ENSG00000070770,ENSG00000071127…
245	rna	positive	TF	Factor: Sp3; motif: GGGGCGGGGSNN	TF:M07615	0.0032461535254442605	2833	531	281	6295	ENSG00000004059,ENSG00000005302,ENSG00000007402,ENSG00000007866,ENSG00000018610,ENSG00000019582,ENSG00000022267,ENSG00000029993,ENSG00000034152,ENSG00000039523,ENSG00000042493,ENSG00000044446,ENSG00000048028,ENSG00000055483,ENSG00000056277,ENSG00000056998,ENSG00000061273,ENSG00000063241,ENSG00000063601,ENSG00000063660,ENSG00000066629,ENSG00000067113,ENSG00000070718,ENSG00000070770,ENSG00000071127…
246	rna	positive	TF	Factor: Fra-2; motif: TGASTCANCN	TF:M03870	0.003253350489546075	1038	531	120	6295	ENSG00000007866,ENSG00000034152,ENSG00000039523,ENSG00000042493,ENSG00000046651,ENSG00000065833,ENSG00000067225,ENSG00000068323,ENSG00000076043,ENSG00000087842,ENSG00000096060,ENSG00000096080,ENSG00000101421,ENSG00000101849,ENSG00000101871,ENSG00000101966,ENSG00000102054,ENSG00000103187,ENSG00000105379,ENSG00000105767,ENSG00000106397,ENSG00000107130,ENSG00000107438,ENSG00000108821,ENSG00000108828…
247	rna	positive	TF	Factor: SP1; motif: CCCCKCCCCC; match class: 1	TF:M02281_1	0.003253350489546075	1090	531	125	6295	ENSG00000005302,ENSG00000007866,ENSG00000048028,ENSG00000056277,ENSG00000063241,ENSG00000063660,ENSG00000068400,ENSG00000071127,ENSG00000072062,ENSG00000072786,ENSG00000076706,ENSG00000077150,ENSG00000077721,ENSG00000086712,ENSG00000088305,ENSG00000088808,ENSG00000089159,ENSG00000095380,ENSG00000100092,ENSG00000100097,ENSG00000100417,ENSG00000101972,ENSG00000102038,ENSG00000102054,ENSG00000102096…
248	rna	positive	TF	Factor: Fra-2; motif: TGASTCANCN; match class: 0	TF:M03870_0	0.003253350489546075	1038	531	120	6295	ENSG00000007866,ENSG00000034152,ENSG00000039523,ENSG00000042493,ENSG00000046651,ENSG00000065833,ENSG00000067225,ENSG00000068323,ENSG00000076043,ENSG00000087842,ENSG00000096060,ENSG00000096080,ENSG00000101421,ENSG00000101849,ENSG00000101871,ENSG00000101966,ENSG00000102054,ENSG00000103187,ENSG00000105379,ENSG00000105767,ENSG00000106397,ENSG00000107130,ENSG00000107438,ENSG00000108821,ENSG00000108828…
249	rna	positive	TF	Factor: gli3; motif: GACCACCCANG; match class: 0	TF:M01704_0	0.003253350489546075	1132	531	129	6295	ENSG00000006757,ENSG00000007866,ENSG00000014216,ENSG00000031698,ENSG00000038532,ENSG00000039523,ENSG00000046653,ENSG00000047230,ENSG00000058668,ENSG00000061273,ENSG00000065833,ENSG00000068366,ENSG00000068400,ENSG00000070718,ENSG00000071127,ENSG00000072786,ENSG00000076043,ENSG00000076706,ENSG00000077150,ENSG00000082458,ENSG00000083444,ENSG00000087842,ENSG00000089159,ENSG00000095380,ENSG00000100092…
250	rna	positive	TF	Factor: gli3; motif: GACCACCCANG	TF:M01704	0.003253350489546075	1132	531	129	6295	ENSG00000006757,ENSG00000007866,ENSG00000014216,ENSG00000031698,ENSG00000038532,ENSG00000039523,ENSG00000046653,ENSG00000047230,ENSG00000058668,ENSG00000061273,ENSG00000065833,ENSG00000068366,ENSG00000068400,ENSG00000070718,ENSG00000071127,ENSG00000072786,ENSG00000076043,ENSG00000076706,ENSG00000077150,ENSG00000082458,ENSG00000083444,ENSG00000087842,ENSG00000089159,ENSG00000095380,ENSG00000100092…
251	rna	positive	TF	Factor: Sp1; motif: GGGGCGGGGC	TF:M07063	0.003253350489546075	3190	531	311	6295	ENSG00000004059,ENSG00000005022,ENSG00000005302,ENSG00000007402,ENSG00000007866,ENSG00000014216,ENSG00000018610,ENSG00000019582,ENSG00000022267,ENSG00000029993,ENSG00000034152,ENSG00000039523,ENSG00000042493,ENSG00000044446,ENSG00000048028,ENSG00000055483,ENSG00000056277,ENSG00000056998,ENSG00000061273,ENSG00000063241,ENSG00000063601,ENSG00000063660,ENSG00000066629,ENSG00000067113,ENSG00000068400…
252	rna	positive	TF	Factor: Sp1; motif: GGGGCGGGGC; match class: 0	TF:M07063_0	0.003253350489546075	3190	531	311	6295	ENSG00000004059,ENSG00000005022,ENSG00000005302,ENSG00000007402,ENSG00000007866,ENSG00000014216,ENSG00000018610,ENSG00000019582,ENSG00000022267,ENSG00000029993,ENSG00000034152,ENSG00000039523,ENSG00000042493,ENSG00000044446,ENSG00000048028,ENSG00000055483,ENSG00000056277,ENSG00000056998,ENSG00000061273,ENSG00000063241,ENSG00000063601,ENSG00000063660,ENSG00000066629,ENSG00000067113,ENSG00000068400…
253	rna	positive	TF	Factor: Fra-2; motif: NRRTGASTCAB; match class: 1	TF:M07092_1	0.0034459066151481125	292	531	44	6295	ENSG00000039523,ENSG00000068323,ENSG00000077150,ENSG00000096080,ENSG00000101966,ENSG00000103187,ENSG00000105767,ENSG00000117676,ENSG00000117877,ENSG00000119888,ENSG00000120885,ENSG00000123130,ENSG00000124839,ENSG00000125970,ENSG00000130176,ENSG00000130479,ENSG00000131435,ENSG00000133083,ENSG00000135046,ENSG00000135241,ENSG00000135424,ENSG00000140650,ENSG00000140694,ENSG00000143545,ENSG00000143771…
254	rna	positive	TF	Factor: GKLF; motif: GCCMCRCCCNNN; match class: 0	TF:M01588_0	0.003499889810965175	3470	531	334	6295	ENSG00000004059,ENSG00000005302,ENSG00000007866,ENSG00000022267,ENSG00000024422,ENSG00000029993,ENSG00000034152,ENSG00000039523,ENSG00000042493,ENSG00000044446,ENSG00000047230,ENSG00000048028,ENSG00000052344,ENSG00000056998,ENSG00000061273,ENSG00000063241,ENSG00000063660,ENSG00000065833,ENSG00000066629,ENSG00000067113,ENSG00000067225,ENSG00000067992,ENSG00000068323,ENSG00000068394,ENSG00000070718…
255	rna	positive	TF	Factor: GKLF; motif: GCCMCRCCCNNN	TF:M01588	0.003499889810965175	3470	531	334	6295	ENSG00000004059,ENSG00000005302,ENSG00000007866,ENSG00000022267,ENSG00000024422,ENSG00000029993,ENSG00000034152,ENSG00000039523,ENSG00000042493,ENSG00000044446,ENSG00000047230,ENSG00000048028,ENSG00000052344,ENSG00000056998,ENSG00000061273,ENSG00000063241,ENSG00000063660,ENSG00000065833,ENSG00000066629,ENSG00000067113,ENSG00000067225,ENSG00000067992,ENSG00000068323,ENSG00000068394,ENSG00000070718…
256	rna	positive	TF	Factor: GLI1; motif: GACCACCCAMG	TF:M01702	0.0037828445289018564	744	531	91	6295	ENSG00000006757,ENSG00000007866,ENSG00000014216,ENSG00000031698,ENSG00000039523,ENSG00000046653,ENSG00000047230,ENSG00000058668,ENSG00000065833,ENSG00000068366,ENSG00000068400,ENSG00000071127,ENSG00000072786,ENSG00000076706,ENSG00000077150,ENSG00000083444,ENSG00000089159,ENSG00000100097,ENSG00000100417,ENSG00000101421,ENSG00000101911,ENSG00000101972,ENSG00000102172,ENSG00000105088,ENSG00000105223…
257	rna	positive	TF	Factor: GLI1; motif: GACCACCCAMG; match class: 0	TF:M01702_0	0.0037828445289018564	744	531	91	6295	ENSG00000006757,ENSG00000007866,ENSG00000014216,ENSG00000031698,ENSG00000039523,ENSG00000046653,ENSG00000047230,ENSG00000058668,ENSG00000065833,ENSG00000068366,ENSG00000068400,ENSG00000071127,ENSG00000072786,ENSG00000076706,ENSG00000077150,ENSG00000083444,ENSG00000089159,ENSG00000100097,ENSG00000100417,ENSG00000101421,ENSG00000101911,ENSG00000101972,ENSG00000102172,ENSG00000105088,ENSG00000105223…
258	rna	positive	TF	Factor: AP2; motif: GCCYGSGGSN; match class: 1	TF:M08867_1	0.0038333280811607335	2012	531	209	6295	ENSG00000005022,ENSG00000005302,ENSG00000007402,ENSG00000007866,ENSG00000014216,ENSG00000022267,ENSG00000029993,ENSG00000039523,ENSG00000044446,ENSG00000048028,ENSG00000055483,ENSG00000056277,ENSG00000061273,ENSG00000063660,ENSG00000065833,ENSG00000066629,ENSG00000067992,ENSG00000068323,ENSG00000070718,ENSG00000070770,ENSG00000071859,ENSG00000072062,ENSG00000072786,ENSG00000075624,ENSG00000076706…
259	rna	positive	TF	Factor: WT1; motif: CGCCCCCNCN; match class: 0	TF:M02036_0	0.0038572026073077845	3879	531	367	6295	ENSG00000004059,ENSG00000005022,ENSG00000005302,ENSG00000006757,ENSG00000007402,ENSG00000007866,ENSG00000018610,ENSG00000022267,ENSG00000029993,ENSG00000034152,ENSG00000039523,ENSG00000042493,ENSG00000044446,ENSG00000046651,ENSG00000047230,ENSG00000048028,ENSG00000055483,ENSG00000056277,ENSG00000056998,ENSG00000061273,ENSG00000063241,ENSG00000063601,ENSG00000063660,ENSG00000065833,ENSG00000066629…
260	rna	positive	TF	Factor: WT1; motif: CGCCCCCNCN	TF:M02036	0.0038572026073077845	3879	531	367	6295	ENSG00000004059,ENSG00000005022,ENSG00000005302,ENSG00000006757,ENSG00000007402,ENSG00000007866,ENSG00000018610,ENSG00000022267,ENSG00000029993,ENSG00000034152,ENSG00000039523,ENSG00000042493,ENSG00000044446,ENSG00000046651,ENSG00000047230,ENSG00000048028,ENSG00000055483,ENSG00000056277,ENSG00000056998,ENSG00000061273,ENSG00000063241,ENSG00000063601,ENSG00000063660,ENSG00000065833,ENSG00000066629…
261	rna	positive	TF	Factor: Fra-2; motif: RTGACTCANNN	TF:M09616	0.0038572026073077845	1319	531	146	6295	ENSG00000022267,ENSG00000034152,ENSG00000039523,ENSG00000042493,ENSG00000046651,ENSG00000061273,ENSG00000065833,ENSG00000067225,ENSG00000067992,ENSG00000068323,ENSG00000068366,ENSG00000068394,ENSG00000072786,ENSG00000076043,ENSG00000077150,ENSG00000077274,ENSG00000087842,ENSG00000096060,ENSG00000096080,ENSG00000099246,ENSG00000101421,ENSG00000101868,ENSG00000101871,ENSG00000101935,ENSG00000101966…
262	rna	positive	TF	Factor: Fra-2; motif: RTGACTCANNN; match class: 0	TF:M09616_0	0.0038572026073077845	1319	531	146	6295	ENSG00000022267,ENSG00000034152,ENSG00000039523,ENSG00000042493,ENSG00000046651,ENSG00000061273,ENSG00000065833,ENSG00000067225,ENSG00000067992,ENSG00000068323,ENSG00000068366,ENSG00000068394,ENSG00000072786,ENSG00000076043,ENSG00000077150,ENSG00000077274,ENSG00000087842,ENSG00000096060,ENSG00000096080,ENSG00000099246,ENSG00000101421,ENSG00000101868,ENSG00000101871,ENSG00000101935,ENSG00000101966…
263	rna	positive	TF	Factor: BTEB3; motif: BNRNGGGAGGNGT; match class: 1	TF:M01865_1	0.004129417882846604	1505	531	163	6295	ENSG00000005022,ENSG00000005302,ENSG00000014216,ENSG00000022267,ENSG00000024422,ENSG00000029993,ENSG00000031698,ENSG00000034152,ENSG00000039523,ENSG00000046647,ENSG00000052344,ENSG00000056277,ENSG00000056998,ENSG00000058668,ENSG00000061273,ENSG00000063660,ENSG00000067113,ENSG00000067225,ENSG00000069869,ENSG00000071127,ENSG00000071282,ENSG00000072062,ENSG00000072682,ENSG00000076043,ENSG00000076706…
264	rna	positive	TF	Factor: CTCF; motif: NCCRSTAGGGGGCGC	TF:M08911	0.004167370479845061	3502	531	336	6295	ENSG00000004059,ENSG00000004961,ENSG00000005022,ENSG00000005302,ENSG00000006757,ENSG00000007402,ENSG00000007866,ENSG00000014216,ENSG00000019582,ENSG00000024422,ENSG00000029993,ENSG00000034152,ENSG00000038532,ENSG00000039523,ENSG00000042493,ENSG00000044446,ENSG00000046651,ENSG00000048028,ENSG00000056277,ENSG00000056998,ENSG00000061273,ENSG00000063241,ENSG00000063601,ENSG00000063660,ENSG00000065833…
265	rna	positive	TF	Factor: CTCF; motif: NCCRSTAGGGGGCGC; match class: 0	TF:M08911_0	0.004167370479845061	3502	531	336	6295	ENSG00000004059,ENSG00000004961,ENSG00000005022,ENSG00000005302,ENSG00000006757,ENSG00000007402,ENSG00000007866,ENSG00000014216,ENSG00000019582,ENSG00000024422,ENSG00000029993,ENSG00000034152,ENSG00000038532,ENSG00000039523,ENSG00000042493,ENSG00000044446,ENSG00000046651,ENSG00000048028,ENSG00000056277,ENSG00000056998,ENSG00000061273,ENSG00000063241,ENSG00000063601,ENSG00000063660,ENSG00000065833…
266	rna	positive	TF	Factor: NGFI-C; motif: WTGCGTGGGYGG; match class: 0	TF:M00244_0	0.004167370479845061	2357	531	239	6295	ENSG00000004059,ENSG00000005022,ENSG00000005302,ENSG00000006757,ENSG00000007402,ENSG00000007866,ENSG00000018610,ENSG00000022267,ENSG00000031698,ENSG00000038532,ENSG00000044446,ENSG00000047230,ENSG00000048028,ENSG00000055483,ENSG00000056277,ENSG00000063601,ENSG00000063660,ENSG00000065833,ENSG00000066629,ENSG00000067113,ENSG00000068323,ENSG00000068366,ENSG00000070718,ENSG00000071127,ENSG00000072062…
267	rna	positive	TF	Factor: NGFI-C; motif: WTGCGTGGGYGG	TF:M00244	0.004167370479845061	2357	531	239	6295	ENSG00000004059,ENSG00000005022,ENSG00000005302,ENSG00000006757,ENSG00000007402,ENSG00000007866,ENSG00000018610,ENSG00000022267,ENSG00000031698,ENSG00000038532,ENSG00000044446,ENSG00000047230,ENSG00000048028,ENSG00000055483,ENSG00000056277,ENSG00000063601,ENSG00000063660,ENSG00000065833,ENSG00000066629,ENSG00000067113,ENSG00000068323,ENSG00000068366,ENSG00000070718,ENSG00000071127,ENSG00000072062…
268	rna	positive	TF	Factor: SP1; motif: NCCCCKCCCCC; match class: 0	TF:M07226_0	0.004519210812168459	3324	531	321	6295	ENSG00000004059,ENSG00000005302,ENSG00000007402,ENSG00000007866,ENSG00000014216,ENSG00000022267,ENSG00000029993,ENSG00000034152,ENSG00000039523,ENSG00000042493,ENSG00000044446,ENSG00000048028,ENSG00000056277,ENSG00000056998,ENSG00000061273,ENSG00000063241,ENSG00000063601,ENSG00000063660,ENSG00000066629,ENSG00000067113,ENSG00000067225,ENSG00000067992,ENSG00000068323,ENSG00000068400,ENSG00000070718…
269	rna	positive	TF	Factor: LKLF; motif: GGGGTGGKSN; match class: 0	TF:M07261_0	0.004519210812168459	3264	531	316	6295	ENSG00000005022,ENSG00000006757,ENSG00000007402,ENSG00000007866,ENSG00000014216,ENSG00000024422,ENSG00000029993,ENSG00000031698,ENSG00000039523,ENSG00000044446,ENSG00000046651,ENSG00000046653,ENSG00000047230,ENSG00000048028,ENSG00000052344,ENSG00000055483,ENSG00000056277,ENSG00000056998,ENSG00000058668,ENSG00000061273,ENSG00000063241,ENSG00000063601,ENSG00000063660,ENSG00000065833,ENSG00000066629…
270	rna	positive	TF	Factor: LKLF; motif: GGGGTGGKSN	TF:M07261	0.004519210812168459	3264	531	316	6295	ENSG00000005022,ENSG00000006757,ENSG00000007402,ENSG00000007866,ENSG00000014216,ENSG00000024422,ENSG00000029993,ENSG00000031698,ENSG00000039523,ENSG00000044446,ENSG00000046651,ENSG00000046653,ENSG00000047230,ENSG00000048028,ENSG00000052344,ENSG00000055483,ENSG00000056277,ENSG00000056998,ENSG00000058668,ENSG00000061273,ENSG00000063241,ENSG00000063601,ENSG00000063660,ENSG00000065833,ENSG00000066629…
271	rna	positive	TF	Factor: SP1; motif: NCCCCKCCCCC	TF:M07226	0.004519210812168459	3324	531	321	6295	ENSG00000004059,ENSG00000005302,ENSG00000007402,ENSG00000007866,ENSG00000014216,ENSG00000022267,ENSG00000029993,ENSG00000034152,ENSG00000039523,ENSG00000042493,ENSG00000044446,ENSG00000048028,ENSG00000056277,ENSG00000056998,ENSG00000061273,ENSG00000063241,ENSG00000063601,ENSG00000063660,ENSG00000066629,ENSG00000067113,ENSG00000067225,ENSG00000067992,ENSG00000068323,ENSG00000068400,ENSG00000070718…
272	rna	positive	TF	Factor: Gli2; motif: GACCACCCANG; match class: 0	TF:M01703_0	0.004740067830346453	1208	531	135	6295	ENSG00000004059,ENSG00000006757,ENSG00000007866,ENSG00000014216,ENSG00000031698,ENSG00000038532,ENSG00000039523,ENSG00000046653,ENSG00000047230,ENSG00000058668,ENSG00000061273,ENSG00000065833,ENSG00000068366,ENSG00000068400,ENSG00000069869,ENSG00000070718,ENSG00000071127,ENSG00000072786,ENSG00000076043,ENSG00000076706,ENSG00000077150,ENSG00000082458,ENSG00000083444,ENSG00000087842,ENSG00000089159…
273	rna	positive	TF	Factor: Gli2; motif: GACCACCCANG	TF:M01703	0.004740067830346453	1208	531	135	6295	ENSG00000004059,ENSG00000006757,ENSG00000007866,ENSG00000014216,ENSG00000031698,ENSG00000038532,ENSG00000039523,ENSG00000046653,ENSG00000047230,ENSG00000058668,ENSG00000061273,ENSG00000065833,ENSG00000068366,ENSG00000068400,ENSG00000069869,ENSG00000070718,ENSG00000071127,ENSG00000072786,ENSG00000076043,ENSG00000076706,ENSG00000077150,ENSG00000082458,ENSG00000083444,ENSG00000087842,ENSG00000089159…
274	rna	positive	TF	Factor: Osx; motif: CCNCCCCCNNN; match class: 1	TF:M07329_1	0.004754542561396744	1039	531	119	6295	ENSG00000005022,ENSG00000005302,ENSG00000007866,ENSG00000014216,ENSG00000029993,ENSG00000039523,ENSG00000044446,ENSG00000048028,ENSG00000063241,ENSG00000067113,ENSG00000068323,ENSG00000068400,ENSG00000070770,ENSG00000072682,ENSG00000072786,ENSG00000076706,ENSG00000077150,ENSG00000083444,ENSG00000088305,ENSG00000096060,ENSG00000100097,ENSG00000101246,ENSG00000102054,ENSG00000102096,ENSG00000102119…
275	rna	positive	TF	Factor: Sp2; motif: NYSGCCCCGCCCCCY; match class: 1	TF:M03567_1	0.004847123985797612	1588	531	170	6295	ENSG00000005302,ENSG00000007866,ENSG00000014216,ENSG00000022267,ENSG00000029993,ENSG00000044446,ENSG00000048028,ENSG00000055483,ENSG00000056998,ENSG00000061273,ENSG00000063241,ENSG00000063660,ENSG00000070718,ENSG00000070770,ENSG00000071859,ENSG00000072062,ENSG00000075624,ENSG00000076706,ENSG00000076944,ENSG00000077721,ENSG00000086712,ENSG00000088305,ENSG00000088808,ENSG00000089159,ENSG00000095380…
276	rna	positive	TF	Factor: JUND:FRA-1; motif: NRTGACTCAN	TF:M08929	0.004847123985797612	446	531	60	6295	ENSG00000065833,ENSG00000068323,ENSG00000076043,ENSG00000077150,ENSG00000077274,ENSG00000096080,ENSG00000101868,ENSG00000101966,ENSG00000102054,ENSG00000105767,ENSG00000107372,ENSG00000117676,ENSG00000117877,ENSG00000119888,ENSG00000120885,ENSG00000123130,ENSG00000124839,ENSG00000125868,ENSG00000125970,ENSG00000126107,ENSG00000128591,ENSG00000130176,ENSG00000130479,ENSG00000133083,ENSG00000135046…
277	rna	positive	TF	Factor: Sp1; motif: GGGGCGGGGT; match class: 1	TF:M00008_1	0.004847123985797612	2056	531	212	6295	ENSG00000004059,ENSG00000005302,ENSG00000007866,ENSG00000014216,ENSG00000022267,ENSG00000029993,ENSG00000039523,ENSG00000044446,ENSG00000046651,ENSG00000048028,ENSG00000055483,ENSG00000063241,ENSG00000063601,ENSG00000063660,ENSG00000069869,ENSG00000070718,ENSG00000070770,ENSG00000071127,ENSG00000071859,ENSG00000072501,ENSG00000075624,ENSG00000076706,ENSG00000076716,ENSG00000076944,ENSG00000077721…
278	rna	positive	TF	Factor: JUND:FRA-1; motif: NRTGACTCAN; match class: 0	TF:M08929_0	0.004847123985797612	446	531	60	6295	ENSG00000065833,ENSG00000068323,ENSG00000076043,ENSG00000077150,ENSG00000077274,ENSG00000096080,ENSG00000101868,ENSG00000101966,ENSG00000102054,ENSG00000105767,ENSG00000107372,ENSG00000117676,ENSG00000117877,ENSG00000119888,ENSG00000120885,ENSG00000123130,ENSG00000124839,ENSG00000125868,ENSG00000125970,ENSG00000126107,ENSG00000128591,ENSG00000130176,ENSG00000130479,ENSG00000133083,ENSG00000135046…
279	rna	positive	TF	Factor: c-Fos; motif: NNTGASTCATN; match class: 1	TF:M07090_1	0.004996623965116782	466	531	62	6295	ENSG00000022267,ENSG00000039523,ENSG00000068323,ENSG00000068366,ENSG00000077150,ENSG00000096080,ENSG00000101868,ENSG00000101966,ENSG00000102271,ENSG00000105767,ENSG00000108821,ENSG00000108828,ENSG00000117676,ENSG00000117877,ENSG00000119888,ENSG00000120885,ENSG00000123130,ENSG00000124839,ENSG00000125753,ENSG00000125868,ENSG00000125970,ENSG00000126247,ENSG00000128591,ENSG00000130479,ENSG00000130985…
280	rna	positive	TF	Factor: JUND; motif: NATGAGTCAT; match class: 0	TF:M08934_0	0.004996623965116782	1253	531	139	6295	ENSG00000022267,ENSG00000039523,ENSG00000042493,ENSG00000055483,ENSG00000061273,ENSG00000065833,ENSG00000067225,ENSG00000068323,ENSG00000068366,ENSG00000068394,ENSG00000068400,ENSG00000071127,ENSG00000072786,ENSG00000076043,ENSG00000077150,ENSG00000077274,ENSG00000078304,ENSG00000087842,ENSG00000096080,ENSG00000101868,ENSG00000101871,ENSG00000101901,ENSG00000101935,ENSG00000101966,ENSG00000102054…
281	rna	positive	TF	Factor: JUND; motif: NATGAGTCAT	TF:M08934	0.004996623965116782	1253	531	139	6295	ENSG00000022267,ENSG00000039523,ENSG00000042493,ENSG00000055483,ENSG00000061273,ENSG00000065833,ENSG00000067225,ENSG00000068323,ENSG00000068366,ENSG00000068394,ENSG00000068400,ENSG00000071127,ENSG00000072786,ENSG00000076043,ENSG00000077150,ENSG00000077274,ENSG00000078304,ENSG00000087842,ENSG00000096080,ENSG00000101868,ENSG00000101871,ENSG00000101901,ENSG00000101935,ENSG00000101966,ENSG00000102054…
282	rna	positive	TF	Factor: CKROX; motif: SCCCTCCCC; match class: 1	TF:M01175_1	0.004996623965116782	1020	531	117	6295	ENSG00000007866,ENSG00000014216,ENSG00000022267,ENSG00000039523,ENSG00000052344,ENSG00000056998,ENSG00000061273,ENSG00000063601,ENSG00000071127,ENSG00000072062,ENSG00000076706,ENSG00000077150,ENSG00000082458,ENSG00000088305,ENSG00000092820,ENSG00000100092,ENSG00000101160,ENSG00000101246,ENSG00000101335,ENSG00000101849,ENSG00000101966,ENSG00000102119,ENSG00000102316,ENSG00000103381,ENSG00000104093…
283	rna	positive	TF	Factor: SP2; motif: GNNGGGGGCGGGGSN; match class: 1	TF:M03807_1	0.004996623965116782	1833	531	192	6295	ENSG00000005302,ENSG00000007866,ENSG00000022267,ENSG00000029993,ENSG00000034152,ENSG00000044446,ENSG00000048028,ENSG00000055483,ENSG00000056998,ENSG00000061273,ENSG00000063241,ENSG00000063660,ENSG00000070718,ENSG00000070770,ENSG00000071859,ENSG00000072062,ENSG00000075624,ENSG00000076706,ENSG00000076944,ENSG00000077454,ENSG00000077721,ENSG00000086712,ENSG00000088305,ENSG00000088808,ENSG00000089159…
284	rna	positive	TF	Factor: MIBP1; motif: WNWCCCCAGCTR; match class: 0	TF:M03878_0	0.0050591847609754385	824	531	98	6295	ENSG00000003509,ENSG00000022267,ENSG00000024422,ENSG00000034152,ENSG00000052344,ENSG00000056998,ENSG00000068323,ENSG00000068400,ENSG00000070770,ENSG00000072062,ENSG00000077150,ENSG00000096060,ENSG00000100092,ENSG00000100097,ENSG00000101421,ENSG00000101843,ENSG00000102096,ENSG00000103111,ENSG00000103274,ENSG00000103381,ENSG00000104518,ENSG00000104714,ENSG00000105088,ENSG00000105379,ENSG00000109062…
285	rna	positive	TF	Factor: Egr-1; motif: GCGGGGGCGG; match class: 1	TF:M01873_1	0.0050591847609754385	1105	531	125	6295	ENSG00000005022,ENSG00000005302,ENSG00000007402,ENSG00000007866,ENSG00000044446,ENSG00000048028,ENSG00000063241,ENSG00000063601,ENSG00000063660,ENSG00000066629,ENSG00000068366,ENSG00000069869,ENSG00000070718,ENSG00000072062,ENSG00000072682,ENSG00000072786,ENSG00000077150,ENSG00000078808,ENSG00000088305,ENSG00000088808,ENSG00000092148,ENSG00000096717,ENSG00000100417,ENSG00000101335,ENSG00000101935…
286	rna	positive	TF	Factor: MIBP1; motif: WNWCCCCAGCTR	TF:M03878	0.0050591847609754385	824	531	98	6295	ENSG00000003509,ENSG00000022267,ENSG00000024422,ENSG00000034152,ENSG00000052344,ENSG00000056998,ENSG00000068323,ENSG00000068400,ENSG00000070770,ENSG00000072062,ENSG00000077150,ENSG00000096060,ENSG00000100092,ENSG00000100097,ENSG00000101421,ENSG00000101843,ENSG00000102096,ENSG00000103111,ENSG00000103274,ENSG00000103381,ENSG00000104518,ENSG00000104714,ENSG00000105088,ENSG00000105379,ENSG00000109062…
287	rna	positive	TF	Factor: KLF16; motif: GMCACGCCCCC; match class: 1	TF:M03914_1	0.005071374433315504	317	531	46	6295	ENSG00000007866,ENSG00000048028,ENSG00000063241,ENSG00000077721,ENSG00000089159,ENSG00000101335,ENSG00000102038,ENSG00000102054,ENSG00000102103,ENSG00000102119,ENSG00000105321,ENSG00000105767,ENSG00000108830,ENSG00000110435,ENSG00000110651,ENSG00000110880,ENSG00000118898,ENSG00000124596,ENSG00000125733,ENSG00000126768,ENSG00000130202,ENSG00000130522,ENSG00000130762,ENSG00000136436,ENSG00000137409…
288	rna	positive	TF	Factor: Sp1; motif: CCCCGCCCCN; match class: 1	TF:M00933_1	0.005213472010736835	2230	531	227	6295	ENSG00000005302,ENSG00000007866,ENSG00000014216,ENSG00000022267,ENSG00000029993,ENSG00000034152,ENSG00000039523,ENSG00000044446,ENSG00000048028,ENSG00000055483,ENSG00000056277,ENSG00000056998,ENSG00000061273,ENSG00000063241,ENSG00000063660,ENSG00000070718,ENSG00000070770,ENSG00000071127,ENSG00000071859,ENSG00000072062,ENSG00000072501,ENSG00000075624,ENSG00000076706,ENSG00000076716,ENSG00000076944…
289	rna	positive	TF	Factor: SP4; motif: SCCCCGCCCCS	TF:M01273	0.005318215742193203	1461	531	158	6295	ENSG00000004059,ENSG00000007866,ENSG00000022267,ENSG00000029993,ENSG00000044446,ENSG00000048028,ENSG00000063241,ENSG00000063660,ENSG00000066629,ENSG00000070718,ENSG00000070770,ENSG00000071127,ENSG00000071859,ENSG00000072062,ENSG00000075624,ENSG00000076706,ENSG00000077721,ENSG00000086712,ENSG00000088305,ENSG00000088808,ENSG00000089159,ENSG00000095380,ENSG00000100097,ENSG00000100417,ENSG00000101160…
290	rna	positive	TF	Factor: SP4; motif: SCCCCGCCCCS; match class: 0	TF:M01273_0	0.005318215742193203	1461	531	158	6295	ENSG00000004059,ENSG00000007866,ENSG00000022267,ENSG00000029993,ENSG00000044446,ENSG00000048028,ENSG00000063241,ENSG00000063660,ENSG00000066629,ENSG00000070718,ENSG00000070770,ENSG00000071127,ENSG00000071859,ENSG00000072062,ENSG00000075624,ENSG00000076706,ENSG00000077721,ENSG00000086712,ENSG00000088305,ENSG00000088808,ENSG00000089159,ENSG00000095380,ENSG00000100097,ENSG00000100417,ENSG00000101160…
291	rna	positive	TF	Factor: BTEB1; motif: GGGGGCGGGGCNGSGGGNGS; match class: 1	TF:M09723_1	0.0054664875199263	2473	531	248	6295	ENSG00000005022,ENSG00000005302,ENSG00000007402,ENSG00000007866,ENSG00000014216,ENSG00000022267,ENSG00000029993,ENSG00000031698,ENSG00000039523,ENSG00000044446,ENSG00000048028,ENSG00000056277,ENSG00000056998,ENSG00000061273,ENSG00000063241,ENSG00000063601,ENSG00000063660,ENSG00000067113,ENSG00000070718,ENSG00000070770,ENSG00000071127,ENSG00000071282,ENSG00000072062,ENSG00000072506,ENSG00000072786…
292	rna	positive	TF	Factor: VDR; motif: GGGKNARNRRGGWSA	TF:M00444	0.005865757542291118	3445	531	330	6295	ENSG00000004961,ENSG00000005022,ENSG00000005302,ENSG00000006757,ENSG00000007402,ENSG00000007866,ENSG00000014216,ENSG00000022267,ENSG00000029993,ENSG00000031698,ENSG00000039523,ENSG00000046653,ENSG00000047230,ENSG00000048028,ENSG00000052344,ENSG00000055483,ENSG00000056998,ENSG00000058668,ENSG00000061273,ENSG00000063241,ENSG00000063601,ENSG00000063660,ENSG00000065833,ENSG00000066629,ENSG00000067113…
293	rna	positive	TF	Factor: VDR; motif: GGGKNARNRRGGWSA; match class: 0	TF:M00444_0	0.005865757542291118	3445	531	330	6295	ENSG00000004961,ENSG00000005022,ENSG00000005302,ENSG00000006757,ENSG00000007402,ENSG00000007866,ENSG00000014216,ENSG00000022267,ENSG00000029993,ENSG00000031698,ENSG00000039523,ENSG00000046653,ENSG00000047230,ENSG00000048028,ENSG00000052344,ENSG00000055483,ENSG00000056998,ENSG00000058668,ENSG00000061273,ENSG00000063241,ENSG00000063601,ENSG00000063660,ENSG00000065833,ENSG00000066629,ENSG00000067113…
294	rna	positive	TF	Factor: myogenin; motif: RGCAGSTG	TF:M00712	0.006117225773033515	2077	531	213	6295	ENSG00000004961,ENSG00000005022,ENSG00000006757,ENSG00000007402,ENSG00000014216,ENSG00000022267,ENSG00000029993,ENSG00000034152,ENSG00000039523,ENSG00000046651,ENSG00000046653,ENSG00000052344,ENSG00000055483,ENSG00000056277,ENSG00000056998,ENSG00000063241,ENSG00000063601,ENSG00000067225,ENSG00000068366,ENSG00000072062,ENSG00000072501,ENSG00000072682,ENSG00000076043,ENSG00000076944,ENSG00000078304…
295	rna	positive	TF	Factor: myogenin; motif: RGCAGSTG; match class: 0	TF:M00712_0	0.006117225773033515	2077	531	213	6295	ENSG00000004961,ENSG00000005022,ENSG00000006757,ENSG00000007402,ENSG00000014216,ENSG00000022267,ENSG00000029993,ENSG00000034152,ENSG00000039523,ENSG00000046651,ENSG00000046653,ENSG00000052344,ENSG00000055483,ENSG00000056277,ENSG00000056998,ENSG00000063241,ENSG00000063601,ENSG00000067225,ENSG00000068366,ENSG00000072062,ENSG00000072501,ENSG00000072682,ENSG00000076043,ENSG00000076944,ENSG00000078304…
296	rna	positive	TF	Factor: SP2; motif: GNNGGGGGCGGGGSN	TF:M03807	0.006183728200067927	3508	531	335	6295	ENSG00000004059,ENSG00000005022,ENSG00000005302,ENSG00000007402,ENSG00000007866,ENSG00000014216,ENSG00000018610,ENSG00000019582,ENSG00000022267,ENSG00000029993,ENSG00000034152,ENSG00000039523,ENSG00000042493,ENSG00000044446,ENSG00000048028,ENSG00000052344,ENSG00000055483,ENSG00000056277,ENSG00000056998,ENSG00000061273,ENSG00000063241,ENSG00000063660,ENSG00000066629,ENSG00000067113,ENSG00000069869…
297	rna	positive	TF	Factor: SP2; motif: GNNGGGGGCGGGGSN; match class: 0	TF:M03807_0	0.006183728200067927	3508	531	335	6295	ENSG00000004059,ENSG00000005022,ENSG00000005302,ENSG00000007402,ENSG00000007866,ENSG00000014216,ENSG00000018610,ENSG00000019582,ENSG00000022267,ENSG00000029993,ENSG00000034152,ENSG00000039523,ENSG00000042493,ENSG00000044446,ENSG00000048028,ENSG00000052344,ENSG00000055483,ENSG00000056277,ENSG00000056998,ENSG00000061273,ENSG00000063241,ENSG00000063660,ENSG00000066629,ENSG00000067113,ENSG00000069869…
298	rna	positive	TF	Factor: CP2; motif: NNNNCCAGNCNN	TF:M07602	0.006732798403305356	3572	531	340	6295	ENSG00000003509,ENSG00000004059,ENSG00000005022,ENSG00000005302,ENSG00000006757,ENSG00000007866,ENSG00000018610,ENSG00000019582,ENSG00000022267,ENSG00000024422,ENSG00000034152,ENSG00000039523,ENSG00000042493,ENSG00000048028,ENSG00000052344,ENSG00000056998,ENSG00000058668,ENSG00000061273,ENSG00000063241,ENSG00000063601,ENSG00000065833,ENSG00000067113,ENSG00000067225,ENSG00000067992,ENSG00000068323…
299	rna	positive	TF	Factor: CP2; motif: NNNNCCAGNCNN; match class: 0	TF:M07602_0	0.006732798403305356	3572	531	340	6295	ENSG00000003509,ENSG00000004059,ENSG00000005022,ENSG00000005302,ENSG00000006757,ENSG00000007866,ENSG00000018610,ENSG00000019582,ENSG00000022267,ENSG00000024422,ENSG00000034152,ENSG00000039523,ENSG00000042493,ENSG00000048028,ENSG00000052344,ENSG00000056998,ENSG00000058668,ENSG00000061273,ENSG00000063241,ENSG00000063601,ENSG00000065833,ENSG00000067113,ENSG00000067225,ENSG00000067992,ENSG00000068323…
300	rna	positive	TF	Factor: Sp1; motif: GGGGCGGGGC; match class: 1	TF:M07063_1	0.0068534636741241425	1524	531	163	6295	ENSG00000005302,ENSG00000007866,ENSG00000022267,ENSG00000029993,ENSG00000044446,ENSG00000048028,ENSG00000055483,ENSG00000056998,ENSG00000061273,ENSG00000063241,ENSG00000063660,ENSG00000070718,ENSG00000070770,ENSG00000071859,ENSG00000072062,ENSG00000072501,ENSG00000075624,ENSG00000076706,ENSG00000076944,ENSG00000077721,ENSG00000086712,ENSG00000088305,ENSG00000088808,ENSG00000089159,ENSG00000095380…
301	rna	positive	TF	Factor: MAZ; motif: GGGGAGGG; match class: 0	TF:M00649_0	0.006903155748045976	3200	531	309	6295	ENSG00000004059,ENSG00000004961,ENSG00000005302,ENSG00000007402,ENSG00000007866,ENSG00000014216,ENSG00000022267,ENSG00000031698,ENSG00000039523,ENSG00000046651,ENSG00000047230,ENSG00000048028,ENSG00000052344,ENSG00000055483,ENSG00000056277,ENSG00000056998,ENSG00000061273,ENSG00000063241,ENSG00000063601,ENSG00000063660,ENSG00000067113,ENSG00000067225,ENSG00000068323,ENSG00000068400,ENSG00000069869…
302	rna	positive	TF	Factor: WT1; motif: GNGGGGGCGGGG	TF:M03893	0.006903155748045976	3404	531	326	6295	ENSG00000004059,ENSG00000005022,ENSG00000005302,ENSG00000006757,ENSG00000007402,ENSG00000007866,ENSG00000022267,ENSG00000029993,ENSG00000034152,ENSG00000038532,ENSG00000042493,ENSG00000044446,ENSG00000046651,ENSG00000047230,ENSG00000048028,ENSG00000056277,ENSG00000061273,ENSG00000063241,ENSG00000063601,ENSG00000063660,ENSG00000065833,ENSG00000066629,ENSG00000067113,ENSG00000068366,ENSG00000068394…
303	rna	positive	TF	Factor: WT1; motif: GNGGGGGCGGGG; match class: 0	TF:M03893_0	0.006903155748045976	3404	531	326	6295	ENSG00000004059,ENSG00000005022,ENSG00000005302,ENSG00000006757,ENSG00000007402,ENSG00000007866,ENSG00000022267,ENSG00000029993,ENSG00000034152,ENSG00000038532,ENSG00000042493,ENSG00000044446,ENSG00000046651,ENSG00000047230,ENSG00000048028,ENSG00000056277,ENSG00000061273,ENSG00000063241,ENSG00000063601,ENSG00000063660,ENSG00000065833,ENSG00000066629,ENSG00000067113,ENSG00000068366,ENSG00000068394…
304	rna	positive	TF	Factor: KROX; motif: CCCGCCCCCRCCCC; match class: 0	TF:M00982_0	0.006903155748045976	3164	531	306	6295	ENSG00000004059,ENSG00000005022,ENSG00000005302,ENSG00000006757,ENSG00000007402,ENSG00000007866,ENSG00000022267,ENSG00000029993,ENSG00000038532,ENSG00000039523,ENSG00000042493,ENSG00000044446,ENSG00000048028,ENSG00000055483,ENSG00000056277,ENSG00000056998,ENSG00000061273,ENSG00000063241,ENSG00000063601,ENSG00000063660,ENSG00000066629,ENSG00000067113,ENSG00000068366,ENSG00000068394,ENSG00000069869…
305	rna	positive	TF	Factor: KROX; motif: CCCGCCCCCRCCCC	TF:M00982	0.006903155748045976	3164	531	306	6295	ENSG00000004059,ENSG00000005022,ENSG00000005302,ENSG00000006757,ENSG00000007402,ENSG00000007866,ENSG00000022267,ENSG00000029993,ENSG00000038532,ENSG00000039523,ENSG00000042493,ENSG00000044446,ENSG00000048028,ENSG00000055483,ENSG00000056277,ENSG00000056998,ENSG00000061273,ENSG00000063241,ENSG00000063601,ENSG00000063660,ENSG00000066629,ENSG00000067113,ENSG00000068366,ENSG00000068394,ENSG00000069869…
306	rna	positive	TF	Factor: MAZ; motif: GGGGAGGG	TF:M00649	0.006903155748045976	3200	531	309	6295	ENSG00000004059,ENSG00000004961,ENSG00000005302,ENSG00000007402,ENSG00000007866,ENSG00000014216,ENSG00000022267,ENSG00000031698,ENSG00000039523,ENSG00000046651,ENSG00000047230,ENSG00000048028,ENSG00000052344,ENSG00000055483,ENSG00000056277,ENSG00000056998,ENSG00000061273,ENSG00000063241,ENSG00000063601,ENSG00000063660,ENSG00000067113,ENSG00000067225,ENSG00000068323,ENSG00000068400,ENSG00000069869…
307	rna	positive	TF	Factor: LBP-1; motif: CAGCTGS	TF:M00644	0.0069561215927060605	2751	531	271	6295	ENSG00000006757,ENSG00000007402,ENSG00000014216,ENSG00000021826,ENSG00000022267,ENSG00000024422,ENSG00000029993,ENSG00000031698,ENSG00000034152,ENSG00000039523,ENSG00000046653,ENSG00000052344,ENSG00000056277,ENSG00000056998,ENSG00000063241,ENSG00000063601,ENSG00000065833,ENSG00000067113,ENSG00000067225,ENSG00000068323,ENSG00000068366,ENSG00000071282,ENSG00000072062,ENSG00000072506,ENSG00000072682…
308	rna	positive	TF	Factor: LBP-1; motif: CAGCTGS; match class: 0	TF:M00644_0	0.0069561215927060605	2751	531	271	6295	ENSG00000006757,ENSG00000007402,ENSG00000014216,ENSG00000021826,ENSG00000022267,ENSG00000024422,ENSG00000029993,ENSG00000031698,ENSG00000034152,ENSG00000039523,ENSG00000046653,ENSG00000052344,ENSG00000056277,ENSG00000056998,ENSG00000063241,ENSG00000063601,ENSG00000065833,ENSG00000067113,ENSG00000067225,ENSG00000068323,ENSG00000068366,ENSG00000071282,ENSG00000072062,ENSG00000072506,ENSG00000072682…
309	rna	positive	TF	Factor: Fra-1; motif: TGACTCAN; match class: 0	TF:M03869_0	0.00708161481728384	1000	531	114	6295	ENSG00000034152,ENSG00000039523,ENSG00000042493,ENSG00000061273,ENSG00000065833,ENSG00000067225,ENSG00000068323,ENSG00000068394,ENSG00000076043,ENSG00000077150,ENSG00000077274,ENSG00000087842,ENSG00000096060,ENSG00000096080,ENSG00000101868,ENSG00000101871,ENSG00000101935,ENSG00000101966,ENSG00000102054,ENSG00000102098,ENSG00000102225,ENSG00000103187,ENSG00000105767,ENSG00000106397,ENSG00000107372…
310	rna	positive	TF	Factor: AP-2gamma; motif: GCCYNNGGS; match class: 1	TF:M00470_1	0.00708161481728384	2061	531	211	6295	ENSG00000004059,ENSG00000005022,ENSG00000005302,ENSG00000006757,ENSG00000007866,ENSG00000014216,ENSG00000019582,ENSG00000029993,ENSG00000039523,ENSG00000046647,ENSG00000047230,ENSG00000048028,ENSG00000052344,ENSG00000055483,ENSG00000061273,ENSG00000063660,ENSG00000065833,ENSG00000066629,ENSG00000067113,ENSG00000067992,ENSG00000068323,ENSG00000070770,ENSG00000071127,ENSG00000071859,ENSG00000072062…
311	rna	positive	TF	Factor: Fra-1; motif: TGACTCAN	TF:M03869	0.00708161481728384	1000	531	114	6295	ENSG00000034152,ENSG00000039523,ENSG00000042493,ENSG00000061273,ENSG00000065833,ENSG00000067225,ENSG00000068323,ENSG00000068394,ENSG00000076043,ENSG00000077150,ENSG00000077274,ENSG00000087842,ENSG00000096060,ENSG00000096080,ENSG00000101868,ENSG00000101871,ENSG00000101935,ENSG00000101966,ENSG00000102054,ENSG00000102098,ENSG00000102225,ENSG00000103187,ENSG00000105767,ENSG00000106397,ENSG00000107372…
312	rna	positive	TF	Factor: Sp4; motif: SCCCCKCCCCCSN	TF:M07617	0.007163205055817758	1549	531	165	6295	ENSG00000004059,ENSG00000005302,ENSG00000007866,ENSG00000048028,ENSG00000056277,ENSG00000063241,ENSG00000070770,ENSG00000072062,ENSG00000072786,ENSG00000075624,ENSG00000076706,ENSG00000077721,ENSG00000086712,ENSG00000088305,ENSG00000088808,ENSG00000089159,ENSG00000095380,ENSG00000100097,ENSG00000100417,ENSG00000101335,ENSG00000101911,ENSG00000102038,ENSG00000102054,ENSG00000102096,ENSG00000102098…
313	rna	positive	TF	Factor: SMAD5; motif: GSGGCAGM	TF:M03846	0.007163205055817758	2671	531	264	6295	ENSG00000003509,ENSG00000004059,ENSG00000004961,ENSG00000005022,ENSG00000005302,ENSG00000007402,ENSG00000019582,ENSG00000029993,ENSG00000034152,ENSG00000042493,ENSG00000044446,ENSG00000046647,ENSG00000046651,ENSG00000052344,ENSG00000056277,ENSG00000056998,ENSG00000061273,ENSG00000063601,ENSG00000063660,ENSG00000065833,ENSG00000067225,ENSG00000068323,ENSG00000068366,ENSG00000070718,ENSG00000070770…
314	rna	positive	TF	Factor: Sp4; motif: SCCCCKCCCCCSN; match class: 0	TF:M07617_0	0.007163205055817758	1549	531	165	6295	ENSG00000004059,ENSG00000005302,ENSG00000007866,ENSG00000048028,ENSG00000056277,ENSG00000063241,ENSG00000070770,ENSG00000072062,ENSG00000072786,ENSG00000075624,ENSG00000076706,ENSG00000077721,ENSG00000086712,ENSG00000088305,ENSG00000088808,ENSG00000089159,ENSG00000095380,ENSG00000100097,ENSG00000100417,ENSG00000101335,ENSG00000101911,ENSG00000102038,ENSG00000102054,ENSG00000102096,ENSG00000102098…
315	rna	positive	TF	Factor: SMAD5; motif: GSGGCAGM; match class: 0	TF:M03846_0	0.007163205055817758	2671	531	264	6295	ENSG00000003509,ENSG00000004059,ENSG00000004961,ENSG00000005022,ENSG00000005302,ENSG00000007402,ENSG00000019582,ENSG00000029993,ENSG00000034152,ENSG00000042493,ENSG00000044446,ENSG00000046647,ENSG00000046651,ENSG00000052344,ENSG00000056277,ENSG00000056998,ENSG00000061273,ENSG00000063601,ENSG00000063660,ENSG00000065833,ENSG00000067225,ENSG00000068323,ENSG00000068366,ENSG00000070718,ENSG00000070770…
316	rna	positive	TF	Factor: JUND:C-FOS; motif: NNATGAGTCATNN	TF:M08933	0.007609648919502678	1344	531	146	6295	ENSG00000022267,ENSG00000034152,ENSG00000039523,ENSG00000042493,ENSG00000046651,ENSG00000061273,ENSG00000065833,ENSG00000067225,ENSG00000068323,ENSG00000068366,ENSG00000068394,ENSG00000072786,ENSG00000076043,ENSG00000077150,ENSG00000077274,ENSG00000087842,ENSG00000096060,ENSG00000096080,ENSG00000099246,ENSG00000101421,ENSG00000101868,ENSG00000101871,ENSG00000101935,ENSG00000101966,ENSG00000102054…
317	rna	positive	TF	Factor: JUND:C-FOS; motif: NNATGAGTCATNN; match class: 0	TF:M08933_0	0.007609648919502678	1344	531	146	6295	ENSG00000022267,ENSG00000034152,ENSG00000039523,ENSG00000042493,ENSG00000046651,ENSG00000061273,ENSG00000065833,ENSG00000067225,ENSG00000068323,ENSG00000068366,ENSG00000068394,ENSG00000072786,ENSG00000076043,ENSG00000077150,ENSG00000077274,ENSG00000087842,ENSG00000096060,ENSG00000096080,ENSG00000099246,ENSG00000101421,ENSG00000101868,ENSG00000101871,ENSG00000101935,ENSG00000101966,ENSG00000102054…
318	rna	positive	TF	Factor: GLI2; motif: TGGGTGGTCNS	TF:M07291	0.007609648919502678	950	531	109	6295	ENSG00000003509,ENSG00000014216,ENSG00000031698,ENSG00000038532,ENSG00000052344,ENSG00000058668,ENSG00000061273,ENSG00000065833,ENSG00000068366,ENSG00000068400,ENSG00000069869,ENSG00000070718,ENSG00000072786,ENSG00000076043,ENSG00000076706,ENSG00000077150,ENSG00000083444,ENSG00000089159,ENSG00000095380,ENSG00000099940,ENSG00000100092,ENSG00000100097,ENSG00000100417,ENSG00000101882,ENSG00000101911…
319	rna	positive	TF	Factor: GLI2; motif: TGGGTGGTCNS; match class: 0	TF:M07291_0	0.007609648919502678	950	531	109	6295	ENSG00000003509,ENSG00000014216,ENSG00000031698,ENSG00000038532,ENSG00000052344,ENSG00000058668,ENSG00000061273,ENSG00000065833,ENSG00000068366,ENSG00000068400,ENSG00000069869,ENSG00000070718,ENSG00000072786,ENSG00000076043,ENSG00000076706,ENSG00000077150,ENSG00000083444,ENSG00000089159,ENSG00000095380,ENSG00000099940,ENSG00000100092,ENSG00000100097,ENSG00000100417,ENSG00000101882,ENSG00000101911…
320	rna	positive	TF	Factor: MAZ; motif: NKGGGAGGGGRGGR	TF:M02023	0.00780721213727736	2547	531	253	6295	ENSG00000004961,ENSG00000005302,ENSG00000006757,ENSG00000007402,ENSG00000007866,ENSG00000014216,ENSG00000022267,ENSG00000024422,ENSG00000029993,ENSG00000031698,ENSG00000034152,ENSG00000039523,ENSG00000046651,ENSG00000052344,ENSG00000056998,ENSG00000061273,ENSG00000063601,ENSG00000063660,ENSG00000067113,ENSG00000067225,ENSG00000067992,ENSG00000068394,ENSG00000068400,ENSG00000070770,ENSG00000071127…
321	rna	positive	TF	Factor: MAZ; motif: NKGGGAGGGGRGGR; match class: 0	TF:M02023_0	0.00780721213727736	2547	531	253	6295	ENSG00000004961,ENSG00000005302,ENSG00000006757,ENSG00000007402,ENSG00000007866,ENSG00000014216,ENSG00000022267,ENSG00000024422,ENSG00000029993,ENSG00000031698,ENSG00000034152,ENSG00000039523,ENSG00000046651,ENSG00000052344,ENSG00000056998,ENSG00000061273,ENSG00000063601,ENSG00000063660,ENSG00000067113,ENSG00000067225,ENSG00000067992,ENSG00000068394,ENSG00000068400,ENSG00000070770,ENSG00000071127…
322	rna	positive	TF	Factor: ZNF644; motif: TCCWGCCTCTSN; match class: 1	TF:M09737_1	0.00853623878072776	468	531	61	6295	ENSG00000007402,ENSG00000024422,ENSG00000034152,ENSG00000063241,ENSG00000067113,ENSG00000067992,ENSG00000068366,ENSG00000071859,ENSG00000077150,ENSG00000077454,ENSG00000077721,ENSG00000089159,ENSG00000092148,ENSG00000096060,ENSG00000100092,ENSG00000100097,ENSG00000103381,ENSG00000105767,ENSG00000106397,ENSG00000110880,ENSG00000111679,ENSG00000117676,ENSG00000124507,ENSG00000126950,ENSG00000127831…
323	rna	positive	TF	Factor: JunB; motif: NRRTGASTCAK	TF:M07103	0.009316296981134623	708	531	85	6295	ENSG00000039523,ENSG00000042493,ENSG00000065833,ENSG00000068323,ENSG00000072786,ENSG00000076043,ENSG00000077150,ENSG00000077274,ENSG00000087842,ENSG00000096080,ENSG00000101868,ENSG00000101966,ENSG00000102054,ENSG00000102858,ENSG00000103187,ENSG00000105767,ENSG00000107372,ENSG00000108828,ENSG00000117676,ENSG00000117877,ENSG00000119888,ENSG00000120885,ENSG00000123130,ENSG00000124839,ENSG00000125733…
324	rna	positive	TF	Factor: JunB; motif: NRRTGASTCAK; match class: 0	TF:M07103_0	0.009316296981134623	708	531	85	6295	ENSG00000039523,ENSG00000042493,ENSG00000065833,ENSG00000068323,ENSG00000072786,ENSG00000076043,ENSG00000077150,ENSG00000077274,ENSG00000087842,ENSG00000096080,ENSG00000101868,ENSG00000101966,ENSG00000102054,ENSG00000102858,ENSG00000103187,ENSG00000105767,ENSG00000107372,ENSG00000108828,ENSG00000117676,ENSG00000117877,ENSG00000119888,ENSG00000120885,ENSG00000123130,ENSG00000124839,ENSG00000125733…
325	rna	positive	TF	Factor: KLF15; motif: GAGNNGGGGNGTDG	TF:M01714	0.009316296981134623	759	531	90	6295	ENSG00000006757,ENSG00000014216,ENSG00000034152,ENSG00000046653,ENSG00000058668,ENSG00000067113,ENSG00000068323,ENSG00000071127,ENSG00000072062,ENSG00000072501,ENSG00000076706,ENSG00000077721,ENSG00000086712,ENSG00000092820,ENSG00000101335,ENSG00000101849,ENSG00000101871,ENSG00000102038,ENSG00000102096,ENSG00000102178,ENSG00000102226,ENSG00000103187,ENSG00000103274,ENSG00000103381,ENSG00000104714…
326	rna	positive	TF	Factor: KLF15; motif: GAGNNGGGGNGTDG; match class: 0	TF:M01714_0	0.009316296981134623	759	531	90	6295	ENSG00000006757,ENSG00000014216,ENSG00000034152,ENSG00000046653,ENSG00000058668,ENSG00000067113,ENSG00000068323,ENSG00000071127,ENSG00000072062,ENSG00000072501,ENSG00000076706,ENSG00000077721,ENSG00000086712,ENSG00000092820,ENSG00000101335,ENSG00000101849,ENSG00000101871,ENSG00000102038,ENSG00000102096,ENSG00000102178,ENSG00000102226,ENSG00000103187,ENSG00000103274,ENSG00000103381,ENSG00000104714…
327	rna	positive	TF	Factor: c-Jun:B-ATF; motif: RNWATGASTCA	TF:M07076	0.009439564527411536	842	531	98	6295	ENSG00000004961,ENSG00000022267,ENSG00000061273,ENSG00000065833,ENSG00000067225,ENSG00000067992,ENSG00000068323,ENSG00000068366,ENSG00000068394,ENSG00000076043,ENSG00000077150,ENSG00000077274,ENSG00000096080,ENSG00000101421,ENSG00000101935,ENSG00000101966,ENSG00000101974,ENSG00000102054,ENSG00000102218,ENSG00000102271,ENSG00000103187,ENSG00000106077,ENSG00000106397,ENSG00000107130,ENSG00000107372…
328	rna	positive	TF	Factor: AP-2gamma; motif: NTGSCCTGRGGSNN; match class: 1	TF:M09591_1	0.009439564527411536	842	531	98	6295	ENSG00000014216,ENSG00000044446,ENSG00000047230,ENSG00000052344,ENSG00000055483,ENSG00000061273,ENSG00000065833,ENSG00000068323,ENSG00000071859,ENSG00000072682,ENSG00000072786,ENSG00000089159,ENSG00000100097,ENSG00000101246,ENSG00000102172,ENSG00000102226,ENSG00000102401,ENSG00000103415,ENSG00000104833,ENSG00000105379,ENSG00000106605,ENSG00000107130,ENSG00000107438,ENSG00000108828,ENSG00000110880…
329	rna	positive	TF	Factor: ZNF515; motif: WNSCCCCCWGCNG	TF:M08835	0.009439564527411536	1115	531	124	6295	ENSG00000005302,ENSG00000014216,ENSG00000038532,ENSG00000052344,ENSG00000063660,ENSG00000065833,ENSG00000070718,ENSG00000071127,ENSG00000071282,ENSG00000072062,ENSG00000075624,ENSG00000076716,ENSG00000076944,ENSG00000088305,ENSG00000095380,ENSG00000096717,ENSG00000099940,ENSG00000100097,ENSG00000101160,ENSG00000101335,ENSG00000102054,ENSG00000102096,ENSG00000102098,ENSG00000102103,ENSG00000102119…
330	rna	positive	TF	Factor: BTEB2; motif: GCCCCRCCCH	TF:M07409	0.009439564527411536	2187	531	221	6295	ENSG00000004059,ENSG00000007866,ENSG00000022267,ENSG00000029993,ENSG00000034152,ENSG00000039523,ENSG00000044446,ENSG00000048028,ENSG00000056998,ENSG00000061273,ENSG00000063241,ENSG00000063660,ENSG00000066629,ENSG00000067113,ENSG00000067992,ENSG00000070718,ENSG00000070770,ENSG00000071127,ENSG00000071859,ENSG00000072062,ENSG00000075624,ENSG00000076043,ENSG00000076706,ENSG00000077454,ENSG00000077721…
331	rna	positive	TF	Factor: ZNF515; motif: WNSCCCCCWGCNG; match class: 0	TF:M08835_0	0.009439564527411536	1115	531	124	6295	ENSG00000005302,ENSG00000014216,ENSG00000038532,ENSG00000052344,ENSG00000063660,ENSG00000065833,ENSG00000070718,ENSG00000071127,ENSG00000071282,ENSG00000072062,ENSG00000075624,ENSG00000076716,ENSG00000076944,ENSG00000088305,ENSG00000095380,ENSG00000096717,ENSG00000099940,ENSG00000100097,ENSG00000101160,ENSG00000101335,ENSG00000102054,ENSG00000102096,ENSG00000102098,ENSG00000102103,ENSG00000102119…
332	rna	positive	TF	Factor: BTEB2; motif: GCCCCRCCCH; match class: 0	TF:M07409_0	0.009439564527411536	2187	531	221	6295	ENSG00000004059,ENSG00000007866,ENSG00000022267,ENSG00000029993,ENSG00000034152,ENSG00000039523,ENSG00000044446,ENSG00000048028,ENSG00000056998,ENSG00000061273,ENSG00000063241,ENSG00000063660,ENSG00000066629,ENSG00000067113,ENSG00000067992,ENSG00000070718,ENSG00000070770,ENSG00000071127,ENSG00000071859,ENSG00000072062,ENSG00000075624,ENSG00000076043,ENSG00000076706,ENSG00000077454,ENSG00000077721…
333	rna	positive	TF	Factor: c-Jun:B-ATF; motif: RNWATGASTCA; match class: 0	TF:M07076_0	0.009439564527411536	842	531	98	6295	ENSG00000004961,ENSG00000022267,ENSG00000061273,ENSG00000065833,ENSG00000067225,ENSG00000067992,ENSG00000068323,ENSG00000068366,ENSG00000068394,ENSG00000076043,ENSG00000077150,ENSG00000077274,ENSG00000096080,ENSG00000101421,ENSG00000101935,ENSG00000101966,ENSG00000101974,ENSG00000102054,ENSG00000102218,ENSG00000102271,ENSG00000103187,ENSG00000106077,ENSG00000106397,ENSG00000107130,ENSG00000107372…
334	rna	positive	TF	Factor: Sp1; motif: GGGGCGGGGC; match class: 1	TF:M00931_1	0.009532814992740748	2544	531	252	6295	ENSG00000004059,ENSG00000005302,ENSG00000007866,ENSG00000014216,ENSG00000022267,ENSG00000024422,ENSG00000029993,ENSG00000034152,ENSG00000039523,ENSG00000044446,ENSG00000048028,ENSG00000055483,ENSG00000056998,ENSG00000061273,ENSG00000063241,ENSG00000063660,ENSG00000067113,ENSG00000069869,ENSG00000070718,ENSG00000070770,ENSG00000071127,ENSG00000071859,ENSG00000072062,ENSG00000072501,ENSG00000072682…
335	rna	positive	TF	Factor: AP-1; motif: TGACTCAN; match class: 0	TF:M03538_0	0.009645494090869018	238	531	36	6295	ENSG00000061273,ENSG00000067225,ENSG00000068394,ENSG00000101935,ENSG00000103187,ENSG00000106397,ENSG00000111275,ENSG00000119888,ENSG00000120549,ENSG00000120885,ENSG00000123130,ENSG00000125827,ENSG00000130176,ENSG00000130177,ENSG00000133083,ENSG00000135046,ENSG00000135241,ENSG00000140694,ENSG00000143545,ENSG00000143771,ENSG00000147123,ENSG00000149115,ENSG00000156697,ENSG00000158710,ENSG00000158716…
336	rna	positive	TF	Factor: AP-1; motif: TGACTCAN	TF:M03538	0.009645494090869018	238	531	36	6295	ENSG00000061273,ENSG00000067225,ENSG00000068394,ENSG00000101935,ENSG00000103187,ENSG00000106397,ENSG00000111275,ENSG00000119888,ENSG00000120549,ENSG00000120885,ENSG00000123130,ENSG00000125827,ENSG00000130176,ENSG00000130177,ENSG00000133083,ENSG00000135046,ENSG00000135241,ENSG00000140694,ENSG00000143545,ENSG00000143771,ENSG00000147123,ENSG00000149115,ENSG00000156697,ENSG00000158710,ENSG00000158716…
337	rna	positive	TF	Factor: GKLF; motif: CCTCCYN	TF:M01835	0.009645494090869018	5007	531	452	6295	ENSG00000003509,ENSG00000004059,ENSG00000004961,ENSG00000005022,ENSG00000005302,ENSG00000006757,ENSG00000007402,ENSG00000007866,ENSG00000014216,ENSG00000018610,ENSG00000019582,ENSG00000021826,ENSG00000022267,ENSG00000024422,ENSG00000031698,ENSG00000034152,ENSG00000039523,ENSG00000042493,ENSG00000044446,ENSG00000046647,ENSG00000046653,ENSG00000047230,ENSG00000048028,ENSG00000052344,ENSG00000055483…
338	rna	positive	TF	Factor: JunD; motif: TGACTCAN; match class: 0	TF:M03552_0	0.009645494090869018	238	531	36	6295	ENSG00000061273,ENSG00000067225,ENSG00000068394,ENSG00000101935,ENSG00000103187,ENSG00000106397,ENSG00000111275,ENSG00000119888,ENSG00000120549,ENSG00000120885,ENSG00000123130,ENSG00000125827,ENSG00000130176,ENSG00000130177,ENSG00000133083,ENSG00000135046,ENSG00000135241,ENSG00000140694,ENSG00000143545,ENSG00000143771,ENSG00000147123,ENSG00000149115,ENSG00000156697,ENSG00000158710,ENSG00000158716…
339	rna	positive	TF	Factor: JunD; motif: TGACTCAN	TF:M03552	0.009645494090869018	238	531	36	6295	ENSG00000061273,ENSG00000067225,ENSG00000068394,ENSG00000101935,ENSG00000103187,ENSG00000106397,ENSG00000111275,ENSG00000119888,ENSG00000120549,ENSG00000120885,ENSG00000123130,ENSG00000125827,ENSG00000130176,ENSG00000130177,ENSG00000133083,ENSG00000135046,ENSG00000135241,ENSG00000140694,ENSG00000143545,ENSG00000143771,ENSG00000147123,ENSG00000149115,ENSG00000156697,ENSG00000158710,ENSG00000158716…
340	rna	positive	TF	Factor: GKLF; motif: CCTCCYN; match class: 0	TF:M01835_0	0.009645494090869018	5007	531	452	6295	ENSG00000003509,ENSG00000004059,ENSG00000004961,ENSG00000005022,ENSG00000005302,ENSG00000006757,ENSG00000007402,ENSG00000007866,ENSG00000014216,ENSG00000018610,ENSG00000019582,ENSG00000021826,ENSG00000022267,ENSG00000024422,ENSG00000031698,ENSG00000034152,ENSG00000039523,ENSG00000042493,ENSG00000044446,ENSG00000046647,ENSG00000046653,ENSG00000047230,ENSG00000048028,ENSG00000052344,ENSG00000055483…
341	rna	positive	TF	Factor: Egr-1; motif: NNNNNGYGKGGGNGGGNN; match class: 1	TF:M09603_1	0.009765047760317615	540	531	68	6295	ENSG00000005302,ENSG00000007402,ENSG00000007866,ENSG00000031698,ENSG00000048028,ENSG00000056277,ENSG00000068366,ENSG00000072786,ENSG00000076716,ENSG00000077150,ENSG00000088305,ENSG00000088808,ENSG00000101966,ENSG00000102221,ENSG00000103274,ENSG00000105088,ENSG00000105221,ENSG00000105321,ENSG00000106397,ENSG00000107130,ENSG00000109381,ENSG00000110880,ENSG00000115652,ENSG00000116478,ENSG00000116661…
342	rna	positive	TF	Factor: EKLF; motif: NCCMCACCCW; match class: 0	TF:M07281_0	0.01037350137639032	248	531	37	6295	ENSG00000034152,ENSG00000067225,ENSG00000075624,ENSG00000100092,ENSG00000100097,ENSG00000100883,ENSG00000102119,ENSG00000102316,ENSG00000107130,ENSG00000108828,ENSG00000113407,ENSG00000118898,ENSG00000121769,ENSG00000124942,ENSG00000125970,ENSG00000127831,ENSG00000130021,ENSG00000135916,ENSG00000137285,ENSG00000147123,ENSG00000148153,ENSG00000149657,ENSG00000154917,ENSG00000160789,ENSG00000165527…
343	rna	positive	TF	Factor: EGR1; motif: NGNGKGGGYGGNGS; match class: 1	TF:M09761_1	0.01037350137639032	651	531	79	6295	ENSG00000005022,ENSG00000005302,ENSG00000007402,ENSG00000007866,ENSG00000048028,ENSG00000072786,ENSG00000076043,ENSG00000076716,ENSG00000077150,ENSG00000077721,ENSG00000088305,ENSG00000088808,ENSG00000101966,ENSG00000102054,ENSG00000102119,ENSG00000102221,ENSG00000102858,ENSG00000103187,ENSG00000105088,ENSG00000105221,ENSG00000105321,ENSG00000106077,ENSG00000107130,ENSG00000108830,ENSG00000109381…
344	rna	positive	TF	Factor: EKLF; motif: NCCMCACCCW	TF:M07281	0.01037350137639032	248	531	37	6295	ENSG00000034152,ENSG00000067225,ENSG00000075624,ENSG00000100092,ENSG00000100097,ENSG00000100883,ENSG00000102119,ENSG00000102316,ENSG00000107130,ENSG00000108828,ENSG00000113407,ENSG00000118898,ENSG00000121769,ENSG00000124942,ENSG00000125970,ENSG00000127831,ENSG00000130021,ENSG00000135916,ENSG00000137285,ENSG00000147123,ENSG00000148153,ENSG00000149657,ENSG00000154917,ENSG00000160789,ENSG00000165527…
345	rna	positive	TF	Factor: EGR-1; motif: TGCGTGGGCGK; match class: 1	TF:M01972_1	0.010391151653493129	601	531	74	6295	ENSG00000005302,ENSG00000044446,ENSG00000048028,ENSG00000056277,ENSG00000063601,ENSG00000068366,ENSG00000070718,ENSG00000072062,ENSG00000072786,ENSG00000095380,ENSG00000096717,ENSG00000100417,ENSG00000102096,ENSG00000102098,ENSG00000102172,ENSG00000102178,ENSG00000102221,ENSG00000103187,ENSG00000103381,ENSG00000105321,ENSG00000107130,ENSG00000107438,ENSG00000110880,ENSG00000115652,ENSG00000116478…
346	rna	positive	TF	Factor: HDAC1; motif: KGCARGGTC; match class: 1	TF:M07041_1	0.010501251523880218	2090	531	212	6295	ENSG00000005302,ENSG00000007402,ENSG00000014216,ENSG00000019582,ENSG00000034152,ENSG00000039523,ENSG00000044446,ENSG00000046651,ENSG00000052344,ENSG00000055483,ENSG00000063601,ENSG00000066629,ENSG00000067113,ENSG00000067225,ENSG00000067992,ENSG00000070718,ENSG00000070770,ENSG00000071127,ENSG00000072062,ENSG00000072501,ENSG00000072682,ENSG00000072786,ENSG00000075624,ENSG00000076706,ENSG00000083444…
347	rna	positive	TF	Factor: Egr-1; motif: WTGCGTGGGCGK; match class: 0	TF:M00243_0	0.010501251523880218	2124	531	215	6295	ENSG00000004059,ENSG00000005302,ENSG00000006757,ENSG00000007866,ENSG00000018610,ENSG00000022267,ENSG00000029993,ENSG00000031698,ENSG00000034152,ENSG00000038532,ENSG00000044446,ENSG00000046651,ENSG00000047230,ENSG00000055483,ENSG00000056277,ENSG00000063241,ENSG00000063601,ENSG00000063660,ENSG00000065833,ENSG00000066629,ENSG00000067225,ENSG00000068323,ENSG00000068366,ENSG00000070718,ENSG00000071127…
348	rna	positive	TF	Factor: Egr-1; motif: WTGCGTGGGCGK	TF:M00243	0.010501251523880218	2124	531	215	6295	ENSG00000004059,ENSG00000005302,ENSG00000006757,ENSG00000007866,ENSG00000018610,ENSG00000022267,ENSG00000029993,ENSG00000031698,ENSG00000034152,ENSG00000038532,ENSG00000044446,ENSG00000046651,ENSG00000047230,ENSG00000055483,ENSG00000056277,ENSG00000063241,ENSG00000063601,ENSG00000063660,ENSG00000065833,ENSG00000066629,ENSG00000067225,ENSG00000068323,ENSG00000068366,ENSG00000070718,ENSG00000071127…
349	rna	positive	TF	Factor: VDR; motif: GGGKNARNRRGGWSA; match class: 1	TF:M00444_1	0.01068544178013993	1433	531	153	6295	ENSG00000005302,ENSG00000007402,ENSG00000007866,ENSG00000014216,ENSG00000046653,ENSG00000052344,ENSG00000055483,ENSG00000063241,ENSG00000063660,ENSG00000067113,ENSG00000068323,ENSG00000068400,ENSG00000070770,ENSG00000071127,ENSG00000071859,ENSG00000072506,ENSG00000077150,ENSG00000077454,ENSG00000082458,ENSG00000083444,ENSG00000086712,ENSG00000088305,ENSG00000096060,ENSG00000100092,ENSG00000100097…
350	rna	positive	TF	Factor: BTEB1; motif: GGGGGCGGGGCNGSGGGNGS; match class: 0	TF:M09723_0	0.011402191042817386	3966	531	370	6295	ENSG00000004059,ENSG00000005022,ENSG00000005302,ENSG00000007402,ENSG00000007866,ENSG00000014216,ENSG00000018610,ENSG00000022267,ENSG00000024422,ENSG00000029993,ENSG00000031698,ENSG00000034152,ENSG00000039523,ENSG00000042493,ENSG00000044446,ENSG00000048028,ENSG00000052344,ENSG00000055483,ENSG00000056277,ENSG00000056998,ENSG00000061273,ENSG00000063241,ENSG00000063601,ENSG00000063660,ENSG00000066629…
351	rna	positive	TF	Factor: BTEB1; motif: GGGGGCGGGGCNGSGGGNGS	TF:M09723	0.011402191042817386	3966	531	370	6295	ENSG00000004059,ENSG00000005022,ENSG00000005302,ENSG00000007402,ENSG00000007866,ENSG00000014216,ENSG00000018610,ENSG00000022267,ENSG00000024422,ENSG00000029993,ENSG00000031698,ENSG00000034152,ENSG00000039523,ENSG00000042493,ENSG00000044446,ENSG00000048028,ENSG00000052344,ENSG00000055483,ENSG00000056277,ENSG00000056998,ENSG00000061273,ENSG00000063241,ENSG00000063601,ENSG00000063660,ENSG00000066629…
352	rna	positive	TF	Factor: AP-2rep; motif: CAGTGGG; match class: 0	TF:M00468_0	0.011402191042817386	2082	531	211	6295	ENSG00000003509,ENSG00000004059,ENSG00000005302,ENSG00000022267,ENSG00000034152,ENSG00000046651,ENSG00000046653,ENSG00000052344,ENSG00000061273,ENSG00000063241,ENSG00000068323,ENSG00000068366,ENSG00000068394,ENSG00000070718,ENSG00000071859,ENSG00000072682,ENSG00000076944,ENSG00000077454,ENSG00000077721,ENSG00000086712,ENSG00000087842,ENSG00000088305,ENSG00000088808,ENSG00000089159,ENSG00000092820…
353	rna	positive	TF	Factor: AP-2rep; motif: CAGTGGG	TF:M00468	0.011402191042817386	2082	531	211	6295	ENSG00000003509,ENSG00000004059,ENSG00000005302,ENSG00000022267,ENSG00000034152,ENSG00000046651,ENSG00000046653,ENSG00000052344,ENSG00000061273,ENSG00000063241,ENSG00000068323,ENSG00000068366,ENSG00000068394,ENSG00000070718,ENSG00000071859,ENSG00000072682,ENSG00000076944,ENSG00000077454,ENSG00000077721,ENSG00000086712,ENSG00000087842,ENSG00000088305,ENSG00000088808,ENSG00000089159,ENSG00000092820…
354	rna	positive	TF	Factor: Sp1; motif: CCCCGCCCCN; match class: 0	TF:M00933_0	0.011428672058719155	3917	531	366	6295	ENSG00000004059,ENSG00000005022,ENSG00000005302,ENSG00000007402,ENSG00000007866,ENSG00000014216,ENSG00000018610,ENSG00000019582,ENSG00000022267,ENSG00000029993,ENSG00000034152,ENSG00000038532,ENSG00000039523,ENSG00000042493,ENSG00000044446,ENSG00000046651,ENSG00000048028,ENSG00000052344,ENSG00000055483,ENSG00000056277,ENSG00000056998,ENSG00000061273,ENSG00000063241,ENSG00000063601,ENSG00000063660…
355	rna	positive	TF	Factor: Sp1; motif: CCCCGCCCCN	TF:M00933	0.011428672058719155	3917	531	366	6295	ENSG00000004059,ENSG00000005022,ENSG00000005302,ENSG00000007402,ENSG00000007866,ENSG00000014216,ENSG00000018610,ENSG00000019582,ENSG00000022267,ENSG00000029993,ENSG00000034152,ENSG00000038532,ENSG00000039523,ENSG00000042493,ENSG00000044446,ENSG00000046651,ENSG00000048028,ENSG00000052344,ENSG00000055483,ENSG00000056277,ENSG00000056998,ENSG00000061273,ENSG00000063241,ENSG00000063601,ENSG00000063660…
356	rna	positive	TF	Factor: p300; motif: NNNGGGAGTNNNNS; match class: 1	TF:M00033_1	0.01157662375797067	880	531	101	6295	ENSG00000024422,ENSG00000034152,ENSG00000046647,ENSG00000055483,ENSG00000058668,ENSG00000061273,ENSG00000063601,ENSG00000067113,ENSG00000071859,ENSG00000075624,ENSG00000076944,ENSG00000077274,ENSG00000077721,ENSG00000087842,ENSG00000100417,ENSG00000101160,ENSG00000102096,ENSG00000102241,ENSG00000102580,ENSG00000104714,ENSG00000105088,ENSG00000105321,ENSG00000105767,ENSG00000106077,ENSG00000106299…
357	rna	positive	TF	Factor: Egr-1; motif: CCGCCCMCG; match class: 0	TF:M04797_0	0.01164239674275938	2106	531	213	6295	ENSG00000004059,ENSG00000005022,ENSG00000005302,ENSG00000007402,ENSG00000018610,ENSG00000022267,ENSG00000042493,ENSG00000044446,ENSG00000047230,ENSG00000048028,ENSG00000056277,ENSG00000056998,ENSG00000063601,ENSG00000063660,ENSG00000066629,ENSG00000067113,ENSG00000068366,ENSG00000068400,ENSG00000069869,ENSG00000070718,ENSG00000070770,ENSG00000072062,ENSG00000072786,ENSG00000078808,ENSG00000083444…
358	rna	positive	TF	Factor: Egr-1; motif: CCGCCCMCG	TF:M04797	0.01164239674275938	2106	531	213	6295	ENSG00000004059,ENSG00000005022,ENSG00000005302,ENSG00000007402,ENSG00000018610,ENSG00000022267,ENSG00000042493,ENSG00000044446,ENSG00000047230,ENSG00000048028,ENSG00000056277,ENSG00000056998,ENSG00000063601,ENSG00000063660,ENSG00000066629,ENSG00000067113,ENSG00000068366,ENSG00000068400,ENSG00000069869,ENSG00000070718,ENSG00000070770,ENSG00000072062,ENSG00000072786,ENSG00000078808,ENSG00000083444…
359	rna	positive	TF	Factor: KLF8; motif: NGGGGTGYGG; match class: 0	TF:M08818_0	0.011772523870984082	476	531	61	6295	ENSG00000014216,ENSG00000068394,ENSG00000072062,ENSG00000089159,ENSG00000101335,ENSG00000102024,ENSG00000102096,ENSG00000106077,ENSG00000106605,ENSG00000108830,ENSG00000116017,ENSG00000118898,ENSG00000119318,ENSG00000123130,ENSG00000124357,ENSG00000124507,ENSG00000124659,ENSG00000125868,ENSG00000126247,ENSG00000126803,ENSG00000128591,ENSG00000130479,ENSG00000130522,ENSG00000131725,ENSG00000132109…
360	rna	positive	TF	Factor: KLF8; motif: NGGGGTGYGG	TF:M08818	0.011772523870984082	476	531	61	6295	ENSG00000014216,ENSG00000068394,ENSG00000072062,ENSG00000089159,ENSG00000101335,ENSG00000102024,ENSG00000102096,ENSG00000106077,ENSG00000106605,ENSG00000108830,ENSG00000116017,ENSG00000118898,ENSG00000119318,ENSG00000123130,ENSG00000124357,ENSG00000124507,ENSG00000124659,ENSG00000125868,ENSG00000126247,ENSG00000126803,ENSG00000128591,ENSG00000130479,ENSG00000130522,ENSG00000131725,ENSG00000132109…
361	rna	positive	TF	Factor: SP4; motif: SCCCCGCCCCS; match class: 1	TF:M01273_1	0.011825265663897373	447	531	58	6295	ENSG00000007866,ENSG00000029993,ENSG00000048028,ENSG00000063660,ENSG00000070770,ENSG00000071859,ENSG00000077721,ENSG00000089159,ENSG00000095380,ENSG00000100417,ENSG00000101335,ENSG00000102054,ENSG00000102119,ENSG00000102580,ENSG00000105321,ENSG00000105767,ENSG00000106605,ENSG00000108830,ENSG00000109062,ENSG00000110651,ENSG00000110880,ENSG00000116661,ENSG00000117592,ENSG00000123595,ENSG00000125733…
362	rna	positive	TF	Factor: AP-2alpha; motif: GCCNNNRGS	TF:M00469	0.011912032975841728	1994	531	203	6295	ENSG00000004059,ENSG00000004961,ENSG00000005022,ENSG00000005302,ENSG00000007402,ENSG00000007866,ENSG00000014216,ENSG00000029993,ENSG00000039523,ENSG00000044446,ENSG00000046647,ENSG00000048028,ENSG00000055483,ENSG00000061273,ENSG00000063660,ENSG00000065833,ENSG00000066629,ENSG00000067113,ENSG00000067225,ENSG00000067992,ENSG00000068323,ENSG00000071127,ENSG00000075624,ENSG00000077150,ENSG00000077454…
363	rna	positive	TF	Factor: AP-2alpha; motif: GCCNNNRGS; match class: 0	TF:M00469_0	0.011912032975841728	1994	531	203	6295	ENSG00000004059,ENSG00000004961,ENSG00000005022,ENSG00000005302,ENSG00000007402,ENSG00000007866,ENSG00000014216,ENSG00000029993,ENSG00000039523,ENSG00000044446,ENSG00000046647,ENSG00000048028,ENSG00000055483,ENSG00000061273,ENSG00000063660,ENSG00000065833,ENSG00000066629,ENSG00000067113,ENSG00000067225,ENSG00000067992,ENSG00000068323,ENSG00000071127,ENSG00000075624,ENSG00000077150,ENSG00000077454…
364	rna	positive	TF	Factor: ZXDL; motif: NGGGGWS	TF:M05775	0.012025838768099602	2188	531	220	6295	ENSG00000003509,ENSG00000004961,ENSG00000006757,ENSG00000007402,ENSG00000007866,ENSG00000031698,ENSG00000044446,ENSG00000046647,ENSG00000046653,ENSG00000048028,ENSG00000052344,ENSG00000056277,ENSG00000056998,ENSG00000058668,ENSG00000066629,ENSG00000067225,ENSG00000068323,ENSG00000068366,ENSG00000068400,ENSG00000070718,ENSG00000071859,ENSG00000072062,ENSG00000072786,ENSG00000076706,ENSG00000076944…
365	rna	positive	TF	Factor: ZXDL; motif: NGGGGWS; match class: 0	TF:M05775_0	0.012025838768099602	2188	531	220	6295	ENSG00000003509,ENSG00000004961,ENSG00000006757,ENSG00000007402,ENSG00000007866,ENSG00000031698,ENSG00000044446,ENSG00000046647,ENSG00000046653,ENSG00000048028,ENSG00000052344,ENSG00000056277,ENSG00000056998,ENSG00000058668,ENSG00000066629,ENSG00000067225,ENSG00000068323,ENSG00000068366,ENSG00000068400,ENSG00000070718,ENSG00000071859,ENSG00000072062,ENSG00000072786,ENSG00000076706,ENSG00000076944…
366	rna	positive	TF	Factor: Churchill; motif: CGGGNN	TF:M00986	0.012025838768099602	5327	531	475	6295	ENSG00000003509,ENSG00000004059,ENSG00000004961,ENSG00000005022,ENSG00000005302,ENSG00000007402,ENSG00000007866,ENSG00000014216,ENSG00000018610,ENSG00000019582,ENSG00000022267,ENSG00000024422,ENSG00000029993,ENSG00000031698,ENSG00000034152,ENSG00000038532,ENSG00000039523,ENSG00000042493,ENSG00000044446,ENSG00000046647,ENSG00000046651,ENSG00000046653,ENSG00000047230,ENSG00000048028,ENSG00000052344…
367	rna	positive	TF	Factor: TR4; motif: NCCCTGACCYB	TF:M08906	0.012025838768099602	1395	531	149	6295	ENSG00000004059,ENSG00000014216,ENSG00000019582,ENSG00000024422,ENSG00000038532,ENSG00000039523,ENSG00000052344,ENSG00000056998,ENSG00000065833,ENSG00000067113,ENSG00000067225,ENSG00000067992,ENSG00000072682,ENSG00000076944,ENSG00000077150,ENSG00000077721,ENSG00000088305,ENSG00000089159,ENSG00000092820,ENSG00000095637,ENSG00000096060,ENSG00000096080,ENSG00000100417,ENSG00000101246,ENSG00000101335…
368	rna	positive	TF	Factor: Churchill; motif: CGGGNN; match class: 0	TF:M00986_0	0.012025838768099602	5327	531	475	6295	ENSG00000003509,ENSG00000004059,ENSG00000004961,ENSG00000005022,ENSG00000005302,ENSG00000007402,ENSG00000007866,ENSG00000014216,ENSG00000018610,ENSG00000019582,ENSG00000022267,ENSG00000024422,ENSG00000029993,ENSG00000031698,ENSG00000034152,ENSG00000038532,ENSG00000039523,ENSG00000042493,ENSG00000044446,ENSG00000046647,ENSG00000046651,ENSG00000046653,ENSG00000047230,ENSG00000048028,ENSG00000052344…
369	rna	positive	TF	Factor: TR4; motif: NCCCTGACCYB; match class: 0	TF:M08906_0	0.012025838768099602	1395	531	149	6295	ENSG00000004059,ENSG00000014216,ENSG00000019582,ENSG00000024422,ENSG00000038532,ENSG00000039523,ENSG00000052344,ENSG00000056998,ENSG00000065833,ENSG00000067113,ENSG00000067225,ENSG00000067992,ENSG00000072682,ENSG00000076944,ENSG00000077150,ENSG00000077721,ENSG00000088305,ENSG00000089159,ENSG00000092820,ENSG00000095637,ENSG00000096060,ENSG00000096080,ENSG00000100417,ENSG00000101246,ENSG00000101335…
370	rna	positive	TF	Factor: BTEB2; motif: RGGGNGKGGN; match class: 0	TF:M07277_0	0.012025838768099602	3420	531	325	6295	ENSG00000004059,ENSG00000005302,ENSG00000007402,ENSG00000007866,ENSG00000014216,ENSG00000018610,ENSG00000019582,ENSG00000022267,ENSG00000029993,ENSG00000034152,ENSG00000039523,ENSG00000042493,ENSG00000044446,ENSG00000048028,ENSG00000052344,ENSG00000055483,ENSG00000056277,ENSG00000056998,ENSG00000061273,ENSG00000063241,ENSG00000063601,ENSG00000063660,ENSG00000066629,ENSG00000067113,ENSG00000067225…
371	rna	positive	TF	Factor: BTEB2; motif: RGGGNGKGGN	TF:M07277	0.012025838768099602	3420	531	325	6295	ENSG00000004059,ENSG00000005302,ENSG00000007402,ENSG00000007866,ENSG00000014216,ENSG00000018610,ENSG00000019582,ENSG00000022267,ENSG00000029993,ENSG00000034152,ENSG00000039523,ENSG00000042493,ENSG00000044446,ENSG00000048028,ENSG00000052344,ENSG00000055483,ENSG00000056277,ENSG00000056998,ENSG00000061273,ENSG00000063241,ENSG00000063601,ENSG00000063660,ENSG00000066629,ENSG00000067113,ENSG00000067225…
372	rna	positive	TF	Factor: SALL2; motif: GGGTGGG	TF:M04595	0.012117673645200869	4371	531	402	6295	ENSG00000004059,ENSG00000005022,ENSG00000005302,ENSG00000006757,ENSG00000007402,ENSG00000007866,ENSG00000014216,ENSG00000019582,ENSG00000024422,ENSG00000029993,ENSG00000031698,ENSG00000034152,ENSG00000038532,ENSG00000039523,ENSG00000042493,ENSG00000044446,ENSG00000046653,ENSG00000052344,ENSG00000055483,ENSG00000056277,ENSG00000056998,ENSG00000058668,ENSG00000061273,ENSG00000063241,ENSG00000063601…
373	rna	positive	TF	Factor: SALL2; motif: GGGTGGG; match class: 0	TF:M04595_0	0.012117673645200869	4371	531	402	6295	ENSG00000004059,ENSG00000005022,ENSG00000005302,ENSG00000006757,ENSG00000007402,ENSG00000007866,ENSG00000014216,ENSG00000019582,ENSG00000024422,ENSG00000029993,ENSG00000031698,ENSG00000034152,ENSG00000038532,ENSG00000039523,ENSG00000042493,ENSG00000044446,ENSG00000046653,ENSG00000052344,ENSG00000055483,ENSG00000056277,ENSG00000056998,ENSG00000058668,ENSG00000061273,ENSG00000063241,ENSG00000063601…
374	rna	positive	TF	Factor: GLI; motif: NTGGGTGGTN	TF:M07292	0.012131912981723614	1816	531	187	6295	ENSG00000003509,ENSG00000004059,ENSG00000014216,ENSG00000031698,ENSG00000034152,ENSG00000038532,ENSG00000046647,ENSG00000052344,ENSG00000055483,ENSG00000056998,ENSG00000058668,ENSG00000061273,ENSG00000063241,ENSG00000063660,ENSG00000065833,ENSG00000067992,ENSG00000068366,ENSG00000069869,ENSG00000070718,ENSG00000072682,ENSG00000072786,ENSG00000075624,ENSG00000076043,ENSG00000076706,ENSG00000077150…
375	rna	positive	TF	Factor: GLI; motif: NTGGGTGGTN; match class: 0	TF:M07292_0	0.012131912981723614	1816	531	187	6295	ENSG00000003509,ENSG00000004059,ENSG00000014216,ENSG00000031698,ENSG00000034152,ENSG00000038532,ENSG00000046647,ENSG00000052344,ENSG00000055483,ENSG00000056998,ENSG00000058668,ENSG00000061273,ENSG00000063241,ENSG00000063660,ENSG00000065833,ENSG00000067992,ENSG00000068366,ENSG00000069869,ENSG00000070718,ENSG00000072682,ENSG00000072786,ENSG00000075624,ENSG00000076043,ENSG00000076706,ENSG00000077150…
376	rna	positive	TF	Factor: c-Fos; motif: RTGASTCAY; match class: 1	TF:M04693_1	0.012131912981723614	497	531	63	6295	ENSG00000021826,ENSG00000022267,ENSG00000039523,ENSG00000068323,ENSG00000068366,ENSG00000077150,ENSG00000096080,ENSG00000101421,ENSG00000101868,ENSG00000101966,ENSG00000102271,ENSG00000105767,ENSG00000107130,ENSG00000108821,ENSG00000117676,ENSG00000117877,ENSG00000119888,ENSG00000120885,ENSG00000123130,ENSG00000123131,ENSG00000124839,ENSG00000125868,ENSG00000125970,ENSG00000128591,ENSG00000130176…
377	rna	positive	TF	Factor: AP-2; motif: SNNNCCNCAGGCN; match class: 1	TF:M00915_1	0.01237190961643609	1772	531	183	6295	ENSG00000004059,ENSG00000004961,ENSG00000005022,ENSG00000005302,ENSG00000007866,ENSG00000022267,ENSG00000024422,ENSG00000029993,ENSG00000039523,ENSG00000044446,ENSG00000055483,ENSG00000056998,ENSG00000061273,ENSG00000063601,ENSG00000063660,ENSG00000066629,ENSG00000067992,ENSG00000068323,ENSG00000069869,ENSG00000070770,ENSG00000071127,ENSG00000071859,ENSG00000072062,ENSG00000072786,ENSG00000075624…
378	rna	positive	TF	Factor: JunB; motif: NNNTGAGTCAY; match class: 0	TF:M09631_0	0.012497362580415923	567	531	70	6295	ENSG00000039523,ENSG00000065833,ENSG00000068323,ENSG00000076043,ENSG00000077150,ENSG00000077274,ENSG00000087842,ENSG00000096080,ENSG00000101868,ENSG00000101966,ENSG00000102054,ENSG00000105767,ENSG00000108828,ENSG00000117676,ENSG00000117877,ENSG00000119888,ENSG00000120885,ENSG00000123130,ENSG00000124839,ENSG00000125868,ENSG00000125970,ENSG00000126247,ENSG00000128591,ENSG00000130176,ENSG00000130479…
379	rna	positive	TF	Factor: JunB; motif: NNNTGAGTCAY	TF:M09631	0.012497362580415923	567	531	70	6295	ENSG00000039523,ENSG00000065833,ENSG00000068323,ENSG00000076043,ENSG00000077150,ENSG00000077274,ENSG00000087842,ENSG00000096080,ENSG00000101868,ENSG00000101966,ENSG00000102054,ENSG00000105767,ENSG00000108828,ENSG00000117676,ENSG00000117877,ENSG00000119888,ENSG00000120885,ENSG00000123130,ENSG00000124839,ENSG00000125868,ENSG00000125970,ENSG00000126247,ENSG00000128591,ENSG00000130176,ENSG00000130479…
380	rna	positive	TF	Factor: MAZ; motif: NKGGGAGGGGRGGR; match class: 1	TF:M02023_1	0.012751504721091916	1224	531	133	6295	ENSG00000007402,ENSG00000007866,ENSG00000014216,ENSG00000022267,ENSG00000029993,ENSG00000031698,ENSG00000039523,ENSG00000052344,ENSG00000056998,ENSG00000063601,ENSG00000063660,ENSG00000067225,ENSG00000068400,ENSG00000071127,ENSG00000071282,ENSG00000071859,ENSG00000072062,ENSG00000072786,ENSG00000076716,ENSG00000077150,ENSG00000077721,ENSG00000082458,ENSG00000088305,ENSG00000088808,ENSG00000089159…
381	rna	positive	TF	Factor: AP-2gamma; motif: GCCYNCRGSN; match class: 1	TF:M03811_1	0.013104823366790534	1344	531	144	6295	ENSG00000004059,ENSG00000005302,ENSG00000029993,ENSG00000031698,ENSG00000034152,ENSG00000048028,ENSG00000061273,ENSG00000063660,ENSG00000066629,ENSG00000070718,ENSG00000070770,ENSG00000072062,ENSG00000072682,ENSG00000075624,ENSG00000088305,ENSG00000088808,ENSG00000092820,ENSG00000099940,ENSG00000100092,ENSG00000101160,ENSG00000101246,ENSG00000101850,ENSG00000101966,ENSG00000102054,ENSG00000102119…
382	rna	positive	TF	Factor: VDR:RXR-ALPHA; motif: NRGGTCANNNGGTTCNN; match class: 1	TF:M08980_1	0.01322757677529801	1236	531	134	6295	ENSG00000004059,ENSG00000006757,ENSG00000039523,ENSG00000044446,ENSG00000046647,ENSG00000047230,ENSG00000052344,ENSG00000061273,ENSG00000065833,ENSG00000068394,ENSG00000070770,ENSG00000072501,ENSG00000072682,ENSG00000075624,ENSG00000076944,ENSG00000077150,ENSG00000078808,ENSG00000082458,ENSG00000089159,ENSG00000092148,ENSG00000092820,ENSG00000095380,ENSG00000096060,ENSG00000099940,ENSG00000100092…
383	rna	positive	TF	Factor: NF1C; motif: WGCCARR; match class: 1	TF:M09763_1	0.014176595367387296	1120	531	123	6295	ENSG00000007402,ENSG00000022267,ENSG00000024422,ENSG00000034152,ENSG00000039523,ENSG00000068394,ENSG00000070718,ENSG00000071282,ENSG00000071859,ENSG00000072062,ENSG00000072786,ENSG00000076706,ENSG00000076944,ENSG00000077274,ENSG00000078808,ENSG00000082458,ENSG00000083444,ENSG00000092148,ENSG00000100417,ENSG00000101160,ENSG00000101911,ENSG00000102024,ENSG00000102096,ENSG00000102221,ENSG00000102316…
384	rna	positive	TF	Factor: AP-1; motif: NNNTGAGTCAKCN	TF:M00517	0.014176595367387296	1434	531	152	6295	ENSG00000007866,ENSG00000034152,ENSG00000039523,ENSG00000042493,ENSG00000046651,ENSG00000061273,ENSG00000065833,ENSG00000067225,ENSG00000068323,ENSG00000068394,ENSG00000072786,ENSG00000076043,ENSG00000076944,ENSG00000077150,ENSG00000077274,ENSG00000087842,ENSG00000096060,ENSG00000096080,ENSG00000099246,ENSG00000101849,ENSG00000101868,ENSG00000101871,ENSG00000101935,ENSG00000101966,ENSG00000102054…
385	rna	positive	TF	Factor: AP-1; motif: NNNTGAGTCAKCN; match class: 0	TF:M00517_0	0.014176595367387296	1434	531	152	6295	ENSG00000007866,ENSG00000034152,ENSG00000039523,ENSG00000042493,ENSG00000046651,ENSG00000061273,ENSG00000065833,ENSG00000067225,ENSG00000068323,ENSG00000068394,ENSG00000072786,ENSG00000076043,ENSG00000076944,ENSG00000077150,ENSG00000077274,ENSG00000087842,ENSG00000096060,ENSG00000096080,ENSG00000099246,ENSG00000101849,ENSG00000101868,ENSG00000101871,ENSG00000101935,ENSG00000101966,ENSG00000102054…
386	rna	positive	TF	Factor: LKLF; motif: CNCCACCCS; match class: 1	TF:M08819_1	0.014269807539041331	481	531	61	6295	ENSG00000007866,ENSG00000014216,ENSG00000031698,ENSG00000039523,ENSG00000061273,ENSG00000063601,ENSG00000067225,ENSG00000067992,ENSG00000077454,ENSG00000077721,ENSG00000082458,ENSG00000089159,ENSG00000096060,ENSG00000101972,ENSG00000102038,ENSG00000102225,ENSG00000104714,ENSG00000104833,ENSG00000105088,ENSG00000107438,ENSG00000116661,ENSG00000116774,ENSG00000118898,ENSG00000121769,ENSG00000123562…
387	rna	positive	TF	Factor: Sp2; motif: GYCCCGCCYCYNNNN	TF:M07129	0.014395912155897743	2635	531	258	6295	ENSG00000004059,ENSG00000005302,ENSG00000007402,ENSG00000007866,ENSG00000022267,ENSG00000024422,ENSG00000029993,ENSG00000034152,ENSG00000039523,ENSG00000042493,ENSG00000044446,ENSG00000048028,ENSG00000056277,ENSG00000056998,ENSG00000063241,ENSG00000063601,ENSG00000063660,ENSG00000067113,ENSG00000068400,ENSG00000070718,ENSG00000070770,ENSG00000071859,ENSG00000072062,ENSG00000072786,ENSG00000075624…
388	rna	positive	TF	Factor: Sp2; motif: GYCCCGCCYCYNNNN; match class: 0	TF:M07129_0	0.014395912155897743	2635	531	258	6295	ENSG00000004059,ENSG00000005302,ENSG00000007402,ENSG00000007866,ENSG00000022267,ENSG00000024422,ENSG00000029993,ENSG00000034152,ENSG00000039523,ENSG00000042493,ENSG00000044446,ENSG00000048028,ENSG00000056277,ENSG00000056998,ENSG00000063241,ENSG00000063601,ENSG00000063660,ENSG00000067113,ENSG00000068400,ENSG00000070718,ENSG00000070770,ENSG00000071859,ENSG00000072062,ENSG00000072786,ENSG00000075624…
389	rna	positive	TF	Factor: PUR1; motif: GGGNCAGNN; match class: 1	TF:M01721_1	0.014534580869764809	1057	531	117	6295	ENSG00000004059,ENSG00000007402,ENSG00000014216,ENSG00000044446,ENSG00000052344,ENSG00000063660,ENSG00000067113,ENSG00000068323,ENSG00000070770,ENSG00000071127,ENSG00000071859,ENSG00000075624,ENSG00000076716,ENSG00000082458,ENSG00000088305,ENSG00000092148,ENSG00000099940,ENSG00000101160,ENSG00000101335,ENSG00000102096,ENSG00000102858,ENSG00000104093,ENSG00000104714,ENSG00000105321,ENSG00000105767…
390	rna	positive	TF	Factor: Sp1; motif: NNGGGGCGGGGNN; match class: 1	TF:M00932_1	0.014678472226459169	2601	531	255	6295	ENSG00000004059,ENSG00000005302,ENSG00000007866,ENSG00000014216,ENSG00000022267,ENSG00000024422,ENSG00000029993,ENSG00000034152,ENSG00000039523,ENSG00000044446,ENSG00000048028,ENSG00000055483,ENSG00000056998,ENSG00000061273,ENSG00000063241,ENSG00000063660,ENSG00000067113,ENSG00000069869,ENSG00000070718,ENSG00000070770,ENSG00000071127,ENSG00000071859,ENSG00000072062,ENSG00000072501,ENSG00000072682…
391	rna	positive	TF	Factor: AP2; motif: GCCYGSGGSN; match class: 0	TF:M08867_0	0.014710440289848943	3783	531	354	6295	ENSG00000003509,ENSG00000004059,ENSG00000004961,ENSG00000005022,ENSG00000005302,ENSG00000006757,ENSG00000007402,ENSG00000007866,ENSG00000014216,ENSG00000022267,ENSG00000029993,ENSG00000038532,ENSG00000039523,ENSG00000042493,ENSG00000044446,ENSG00000046647,ENSG00000047230,ENSG00000048028,ENSG00000055483,ENSG00000056277,ENSG00000056998,ENSG00000061273,ENSG00000063601,ENSG00000063660,ENSG00000065833…
392	rna	positive	TF	Factor: AP2; motif: GCCYGSGGSN	TF:M08867	0.014710440289848943	3783	531	354	6295	ENSG00000003509,ENSG00000004059,ENSG00000004961,ENSG00000005022,ENSG00000005302,ENSG00000006757,ENSG00000007402,ENSG00000007866,ENSG00000014216,ENSG00000022267,ENSG00000029993,ENSG00000038532,ENSG00000039523,ENSG00000042493,ENSG00000044446,ENSG00000046647,ENSG00000047230,ENSG00000048028,ENSG00000055483,ENSG00000056277,ENSG00000056998,ENSG00000061273,ENSG00000063601,ENSG00000063660,ENSG00000065833…
393	rna	positive	TF	Factor: SP1; motif: NRGKGGGCGGGGCN; match class: 1	TF:M09765_1	0.01527590910362124	1470	531	155	6295	ENSG00000005302,ENSG00000007866,ENSG00000022267,ENSG00000029993,ENSG00000034152,ENSG00000044446,ENSG00000048028,ENSG00000063241,ENSG00000063660,ENSG00000070718,ENSG00000070770,ENSG00000071859,ENSG00000072062,ENSG00000076706,ENSG00000076944,ENSG00000077721,ENSG00000086712,ENSG00000088305,ENSG00000088808,ENSG00000089159,ENSG00000095380,ENSG00000099940,ENSG00000100097,ENSG00000100417,ENSG00000101335…
394	rna	positive	TF	Factor: SP2; motif: GGGCGGGAC; match class: 1	TF:M01783_1	0.015378331424168062	1837	531	188	6295	ENSG00000004059,ENSG00000007866,ENSG00000022267,ENSG00000029993,ENSG00000039523,ENSG00000044446,ENSG00000046647,ENSG00000048028,ENSG00000061273,ENSG00000063241,ENSG00000063660,ENSG00000067113,ENSG00000070718,ENSG00000070770,ENSG00000071127,ENSG00000071859,ENSG00000072062,ENSG00000072682,ENSG00000076944,ENSG00000077454,ENSG00000077721,ENSG00000088305,ENSG00000088808,ENSG00000089159,ENSG00000095380…
395	rna	positive	TF	Factor: WT1; motif: NNGGGNGGGSGN; match class: 1	TF:M07436_1	0.015378331424168062	890	531	101	6295	ENSG00000005302,ENSG00000007866,ENSG00000031698,ENSG00000039523,ENSG00000046653,ENSG00000048028,ENSG00000068394,ENSG00000071282,ENSG00000072786,ENSG00000076706,ENSG00000077150,ENSG00000077454,ENSG00000086712,ENSG00000092820,ENSG00000099940,ENSG00000100092,ENSG00000101972,ENSG00000102038,ENSG00000102096,ENSG00000102221,ENSG00000102401,ENSG00000105088,ENSG00000105221,ENSG00000105767,ENSG00000107130…
396	rna	positive	TF	Factor: Egr; motif: GTGGGSGCRRS; match class: 0	TF:M00807_0	0.015440595332754612	1548	531	162	6295	ENSG00000005022,ENSG00000005302,ENSG00000006757,ENSG00000007402,ENSG00000007866,ENSG00000014216,ENSG00000044446,ENSG00000052344,ENSG00000055483,ENSG00000063241,ENSG00000063660,ENSG00000067113,ENSG00000069869,ENSG00000070718,ENSG00000072506,ENSG00000072682,ENSG00000072786,ENSG00000075624,ENSG00000076043,ENSG00000076944,ENSG00000082458,ENSG00000088808,ENSG00000092148,ENSG00000092820,ENSG00000096060…
397	rna	positive	TF	Factor: Egr; motif: GTGGGSGCRRS	TF:M00807	0.015440595332754612	1548	531	162	6295	ENSG00000005022,ENSG00000005302,ENSG00000006757,ENSG00000007402,ENSG00000007866,ENSG00000014216,ENSG00000044446,ENSG00000052344,ENSG00000055483,ENSG00000063241,ENSG00000063660,ENSG00000067113,ENSG00000069869,ENSG00000070718,ENSG00000072506,ENSG00000072682,ENSG00000072786,ENSG00000075624,ENSG00000076043,ENSG00000076944,ENSG00000082458,ENSG00000088808,ENSG00000092148,ENSG00000092820,ENSG00000096060…
398	rna	positive	TF	Factor: E2F-3; motif: GGCGGGN; match class: 0	TF:M02089_0	0.015440595332754612	5174	531	463	6295	ENSG00000003509,ENSG00000004059,ENSG00000005022,ENSG00000005302,ENSG00000006757,ENSG00000007402,ENSG00000007866,ENSG00000014216,ENSG00000018610,ENSG00000019582,ENSG00000022267,ENSG00000024422,ENSG00000029993,ENSG00000031698,ENSG00000034152,ENSG00000038532,ENSG00000039523,ENSG00000042493,ENSG00000044446,ENSG00000046647,ENSG00000046651,ENSG00000046653,ENSG00000048028,ENSG00000052344,ENSG00000055483…
399	rna	positive	TF	Factor: E2F-3; motif: GGCGGGN	TF:M02089	0.015440595332754612	5174	531	463	6295	ENSG00000003509,ENSG00000004059,ENSG00000005022,ENSG00000005302,ENSG00000006757,ENSG00000007402,ENSG00000007866,ENSG00000014216,ENSG00000018610,ENSG00000019582,ENSG00000022267,ENSG00000024422,ENSG00000029993,ENSG00000031698,ENSG00000034152,ENSG00000038532,ENSG00000039523,ENSG00000042493,ENSG00000044446,ENSG00000046647,ENSG00000046651,ENSG00000046653,ENSG00000048028,ENSG00000052344,ENSG00000055483…
400	rna	positive	TF	Factor: RFX3; motif: NYNCCMTGGCAACM; match class: 0	TF:M09732_0	0.01598789895601764	1649	531	171	6295	ENSG00000003509,ENSG00000005302,ENSG00000007402,ENSG00000014216,ENSG00000018610,ENSG00000024422,ENSG00000029993,ENSG00000039523,ENSG00000046647,ENSG00000061273,ENSG00000063601,ENSG00000063660,ENSG00000066629,ENSG00000069869,ENSG00000070718,ENSG00000071859,ENSG00000072501,ENSG00000075624,ENSG00000076043,ENSG00000077721,ENSG00000087842,ENSG00000088305,ENSG00000088808,ENSG00000092148,ENSG00000092820…
401	rna	positive	TF	Factor: RFX3; motif: NYNCCMTGGCAACM	TF:M09732	0.01598789895601764	1649	531	171	6295	ENSG00000003509,ENSG00000005302,ENSG00000007402,ENSG00000014216,ENSG00000018610,ENSG00000024422,ENSG00000029993,ENSG00000039523,ENSG00000046647,ENSG00000061273,ENSG00000063601,ENSG00000063660,ENSG00000066629,ENSG00000069869,ENSG00000070718,ENSG00000071859,ENSG00000072501,ENSG00000075624,ENSG00000076043,ENSG00000077721,ENSG00000087842,ENSG00000088305,ENSG00000088808,ENSG00000092148,ENSG00000092820…
402	rna	positive	TF	Factor: BTEB2; motif: RGGGNGKGGN; match class: 1	TF:M07277_1	0.016794261858159992	1807	531	185	6295	ENSG00000004059,ENSG00000005302,ENSG00000007402,ENSG00000007866,ENSG00000014216,ENSG00000022267,ENSG00000029993,ENSG00000039523,ENSG00000044446,ENSG00000048028,ENSG00000055483,ENSG00000056998,ENSG00000061273,ENSG00000063660,ENSG00000070770,ENSG00000071859,ENSG00000072062,ENSG00000072501,ENSG00000072786,ENSG00000075624,ENSG00000076706,ENSG00000076944,ENSG00000077150,ENSG00000077721,ENSG00000086712…
403	rna	positive	TF	Factor: AP-1; motif: NNNTGAGTCAKCN; match class: 1	TF:M00517_1	0.016915109480672395	914	531	103	6295	ENSG00000034152,ENSG00000039523,ENSG00000042493,ENSG00000046651,ENSG00000061273,ENSG00000065833,ENSG00000067225,ENSG00000068323,ENSG00000068394,ENSG00000076043,ENSG00000077150,ENSG00000077274,ENSG00000087842,ENSG00000096060,ENSG00000096080,ENSG00000101868,ENSG00000101935,ENSG00000101966,ENSG00000102054,ENSG00000102098,ENSG00000105767,ENSG00000106397,ENSG00000108828,ENSG00000116954,ENSG00000117450…
404	rna	positive	TF	Factor: VDR; motif: RRGGTCANNGRGKTCA; match class: 1	TF:M09671_1	0.01711157793995436	676	531	80	6295	ENSG00000005302,ENSG00000039523,ENSG00000042493,ENSG00000048028,ENSG00000063241,ENSG00000067225,ENSG00000068394,ENSG00000071282,ENSG00000075624,ENSG00000083444,ENSG00000088305,ENSG00000089159,ENSG00000092820,ENSG00000100092,ENSG00000100097,ENSG00000101160,ENSG00000101335,ENSG00000101911,ENSG00000101935,ENSG00000102178,ENSG00000102221,ENSG00000102316,ENSG00000103111,ENSG00000103187,ENSG00000106397…
405	rna	positive	TF	Factor: ZBP89; motif: YCCYCCCCCM; match class: 0	TF:M01816_0	0.017188073415415294	779	531	90	6295	ENSG00000005302,ENSG00000014216,ENSG00000024422,ENSG00000031698,ENSG00000038532,ENSG00000056998,ENSG00000061273,ENSG00000063660,ENSG00000076706,ENSG00000077150,ENSG00000096060,ENSG00000101160,ENSG00000102024,ENSG00000102221,ENSG00000102271,ENSG00000102401,ENSG00000105088,ENSG00000105321,ENSG00000105379,ENSG00000106299,ENSG00000107372,ENSG00000116017,ENSG00000116478,ENSG00000116670,ENSG00000119318…
406	rna	positive	TF	Factor: ZBP89; motif: YCCYCCCCCM	TF:M01816	0.017188073415415294	779	531	90	6295	ENSG00000005302,ENSG00000014216,ENSG00000024422,ENSG00000031698,ENSG00000038532,ENSG00000056998,ENSG00000061273,ENSG00000063660,ENSG00000076706,ENSG00000077150,ENSG00000096060,ENSG00000101160,ENSG00000102024,ENSG00000102221,ENSG00000102271,ENSG00000102401,ENSG00000105088,ENSG00000105321,ENSG00000105379,ENSG00000106299,ENSG00000107372,ENSG00000116017,ENSG00000116478,ENSG00000116670,ENSG00000119318…
407	rna	positive	TF	Factor: AP1; motif: TGACTCA; match class: 0	TF:M02280_0	0.017344074890353882	1203	531	130	6295	ENSG00000034152,ENSG00000039523,ENSG00000042493,ENSG00000046651,ENSG00000061273,ENSG00000065833,ENSG00000067225,ENSG00000068323,ENSG00000068394,ENSG00000072786,ENSG00000076043,ENSG00000077150,ENSG00000077274,ENSG00000087842,ENSG00000096060,ENSG00000096080,ENSG00000099246,ENSG00000101868,ENSG00000101871,ENSG00000101935,ENSG00000101966,ENSG00000102054,ENSG00000102098,ENSG00000102225,ENSG00000102230…
408	rna	positive	TF	Factor: AP1; motif: TGACTCA	TF:M02280	0.017344074890353882	1203	531	130	6295	ENSG00000034152,ENSG00000039523,ENSG00000042493,ENSG00000046651,ENSG00000061273,ENSG00000065833,ENSG00000067225,ENSG00000068323,ENSG00000068394,ENSG00000072786,ENSG00000076043,ENSG00000077150,ENSG00000077274,ENSG00000087842,ENSG00000096060,ENSG00000096080,ENSG00000099246,ENSG00000101868,ENSG00000101871,ENSG00000101935,ENSG00000101966,ENSG00000102054,ENSG00000102098,ENSG00000102225,ENSG00000102230…
409	rna	positive	TF	Factor: JunB; motif: TGACTCAN	TF:M03551	0.017344074890353882	1203	531	130	6295	ENSG00000034152,ENSG00000039523,ENSG00000042493,ENSG00000046651,ENSG00000061273,ENSG00000065833,ENSG00000067225,ENSG00000068323,ENSG00000068394,ENSG00000072786,ENSG00000076043,ENSG00000077150,ENSG00000077274,ENSG00000087842,ENSG00000096060,ENSG00000096080,ENSG00000099246,ENSG00000101868,ENSG00000101871,ENSG00000101935,ENSG00000101966,ENSG00000102054,ENSG00000102098,ENSG00000102225,ENSG00000102230…
410	rna	positive	TF	Factor: JunB; motif: TGACTCAN; match class: 0	TF:M03551_0	0.017344074890353882	1203	531	130	6295	ENSG00000034152,ENSG00000039523,ENSG00000042493,ENSG00000046651,ENSG00000061273,ENSG00000065833,ENSG00000067225,ENSG00000068323,ENSG00000068394,ENSG00000072786,ENSG00000076043,ENSG00000077150,ENSG00000077274,ENSG00000087842,ENSG00000096060,ENSG00000096080,ENSG00000099246,ENSG00000101868,ENSG00000101871,ENSG00000101935,ENSG00000101966,ENSG00000102054,ENSG00000102098,ENSG00000102225,ENSG00000102230…
411	rna	positive	TF	Factor: Sp2; motif: NYSGCCCCGCCCCCY; match class: 0	TF:M03567_0	0.017361726547537613	3223	531	307	6295	ENSG00000004059,ENSG00000005302,ENSG00000007402,ENSG00000007866,ENSG00000014216,ENSG00000019582,ENSG00000022267,ENSG00000029993,ENSG00000034152,ENSG00000038532,ENSG00000039523,ENSG00000042493,ENSG00000044446,ENSG00000048028,ENSG00000052344,ENSG00000055483,ENSG00000056277,ENSG00000056998,ENSG00000061273,ENSG00000063241,ENSG00000063601,ENSG00000063660,ENSG00000066629,ENSG00000067113,ENSG00000070718…
412	rna	positive	TF	Factor: Sp2; motif: NYSGCCCCGCCCCCY	TF:M03567	0.017361726547537613	3223	531	307	6295	ENSG00000004059,ENSG00000005302,ENSG00000007402,ENSG00000007866,ENSG00000014216,ENSG00000019582,ENSG00000022267,ENSG00000029993,ENSG00000034152,ENSG00000038532,ENSG00000039523,ENSG00000042493,ENSG00000044446,ENSG00000048028,ENSG00000052344,ENSG00000055483,ENSG00000056277,ENSG00000056998,ENSG00000061273,ENSG00000063241,ENSG00000063601,ENSG00000063660,ENSG00000066629,ENSG00000067113,ENSG00000070718…
413	rna	positive	TF	Factor: MZF-1; motif: TGGGGAR; match class: 1	TF:M01733_1	0.017434338515624197	1432	531	151	6295	ENSG00000007402,ENSG00000007866,ENSG00000014216,ENSG00000022267,ENSG00000024422,ENSG00000029993,ENSG00000031698,ENSG00000038532,ENSG00000039523,ENSG00000046653,ENSG00000048028,ENSG00000055483,ENSG00000056998,ENSG00000058668,ENSG00000061273,ENSG00000067992,ENSG00000068400,ENSG00000069869,ENSG00000070770,ENSG00000076706,ENSG00000077721,ENSG00000086712,ENSG00000088305,ENSG00000089159,ENSG00000092820…
414	rna	positive	TF	Factor: ZXDL; motif: NGGGGWS; match class: 1	TF:M05775_1	0.01755258007968324	526	531	65	6295	ENSG00000004961,ENSG00000007866,ENSG00000031698,ENSG00000067225,ENSG00000068323,ENSG00000068400,ENSG00000071859,ENSG00000076706,ENSG00000076944,ENSG00000077454,ENSG00000092820,ENSG00000101335,ENSG00000102038,ENSG00000102225,ENSG00000102580,ENSG00000103187,ENSG00000104093,ENSG00000105088,ENSG00000105767,ENSG00000107130,ENSG00000116017,ENSG00000116478,ENSG00000117868,ENSG00000117877,ENSG00000120265…
415	rna	positive	TF	Factor: RREB-1; motif: CCCCAAACMMCCCC	TF:M00257	0.017598212620129172	3428	531	324	6295	ENSG00000003509,ENSG00000004961,ENSG00000006757,ENSG00000007402,ENSG00000007866,ENSG00000014216,ENSG00000024422,ENSG00000029993,ENSG00000031698,ENSG00000038532,ENSG00000039523,ENSG00000046653,ENSG00000047230,ENSG00000055483,ENSG00000056998,ENSG00000058668,ENSG00000061273,ENSG00000063241,ENSG00000063601,ENSG00000063660,ENSG00000066629,ENSG00000067225,ENSG00000067992,ENSG00000068323,ENSG00000068400…
416	rna	positive	TF	Factor: RREB-1; motif: CCCCAAACMMCCCC; match class: 0	TF:M00257_0	0.017598212620129172	3428	531	324	6295	ENSG00000003509,ENSG00000004961,ENSG00000006757,ENSG00000007402,ENSG00000007866,ENSG00000014216,ENSG00000024422,ENSG00000029993,ENSG00000031698,ENSG00000038532,ENSG00000039523,ENSG00000046653,ENSG00000047230,ENSG00000055483,ENSG00000056998,ENSG00000058668,ENSG00000061273,ENSG00000063241,ENSG00000063601,ENSG00000063660,ENSG00000066629,ENSG00000067225,ENSG00000067992,ENSG00000068323,ENSG00000068400…
417	rna	positive	TF	Factor: AP-1; motif: NTGASTCAG; match class: 1	TF:M00199_1	0.017598212620129172	1204	531	130	6295	ENSG00000034152,ENSG00000039523,ENSG00000042493,ENSG00000046651,ENSG00000061273,ENSG00000065833,ENSG00000067225,ENSG00000068323,ENSG00000068394,ENSG00000072786,ENSG00000076043,ENSG00000077150,ENSG00000077274,ENSG00000087842,ENSG00000096060,ENSG00000096080,ENSG00000099246,ENSG00000101868,ENSG00000101871,ENSG00000101935,ENSG00000101966,ENSG00000102054,ENSG00000102098,ENSG00000102225,ENSG00000102230…
418	rna	positive	TF	Factor: ctcf; motif: NNNCCASYAGRKGGCRSYNN	TF:M09602	0.017751093520591364	2623	531	256	6295	ENSG00000003509,ENSG00000004059,ENSG00000004961,ENSG00000005022,ENSG00000005302,ENSG00000007866,ENSG00000014216,ENSG00000019582,ENSG00000024422,ENSG00000029993,ENSG00000034152,ENSG00000039523,ENSG00000042493,ENSG00000044446,ENSG00000046651,ENSG00000052344,ENSG00000055483,ENSG00000056998,ENSG00000063241,ENSG00000063601,ENSG00000063660,ENSG00000066629,ENSG00000067225,ENSG00000068323,ENSG00000068394…
419	rna	positive	TF	Factor: PPARalpha:RXRalpha; motif: NNRGGTCATWGGGGTSANG; match class: 0	TF:M00518_0	0.017751093520591364	3070	531	294	6295	ENSG00000003509,ENSG00000004059,ENSG00000004961,ENSG00000007866,ENSG00000014216,ENSG00000031698,ENSG00000038532,ENSG00000042493,ENSG00000044446,ENSG00000046651,ENSG00000046653,ENSG00000055483,ENSG00000056998,ENSG00000061273,ENSG00000063241,ENSG00000063660,ENSG00000065833,ENSG00000066629,ENSG00000067225,ENSG00000068400,ENSG00000069869,ENSG00000071282,ENSG00000071859,ENSG00000072062,ENSG00000072506…
420	rna	positive	TF	Factor: PPARalpha:RXRalpha; motif: NNRGGTCATWGGGGTSANG	TF:M00518	0.017751093520591364	3070	531	294	6295	ENSG00000003509,ENSG00000004059,ENSG00000004961,ENSG00000007866,ENSG00000014216,ENSG00000031698,ENSG00000038532,ENSG00000042493,ENSG00000044446,ENSG00000046651,ENSG00000046653,ENSG00000055483,ENSG00000056998,ENSG00000061273,ENSG00000063241,ENSG00000063660,ENSG00000065833,ENSG00000066629,ENSG00000067225,ENSG00000068400,ENSG00000069869,ENSG00000071282,ENSG00000071859,ENSG00000072062,ENSG00000072506…
421	rna	positive	TF	Factor: ctcf; motif: NNNCCASYAGRKGGCRSYNN; match class: 0	TF:M09602_0	0.017751093520591364	2623	531	256	6295	ENSG00000003509,ENSG00000004059,ENSG00000004961,ENSG00000005022,ENSG00000005302,ENSG00000007866,ENSG00000014216,ENSG00000019582,ENSG00000024422,ENSG00000029993,ENSG00000034152,ENSG00000039523,ENSG00000042493,ENSG00000044446,ENSG00000046651,ENSG00000052344,ENSG00000055483,ENSG00000056998,ENSG00000063241,ENSG00000063601,ENSG00000063660,ENSG00000066629,ENSG00000067225,ENSG00000068323,ENSG00000068394…
422	rna	positive	TF	Factor: CTCF; motif: ACCAGGKGGC; match class: 1	TF:M04727_1	0.018559719598287627	488	531	61	6295	ENSG00000006757,ENSG00000042493,ENSG00000044446,ENSG00000056998,ENSG00000063241,ENSG00000067225,ENSG00000070770,ENSG00000076944,ENSG00000100092,ENSG00000101335,ENSG00000101811,ENSG00000101972,ENSG00000104833,ENSG00000105321,ENSG00000108821,ENSG00000108829,ENSG00000111275,ENSG00000111679,ENSG00000116954,ENSG00000117592,ENSG00000117676,ENSG00000123130,ENSG00000125733,ENSG00000125868,ENSG00000126950…
423	rna	positive	TF	Factor: MAF; motif: NGCTGAGTCAN; match class: 0	TF:M00983_0	0.018559719598287627	1790	531	183	6295	ENSG00000004059,ENSG00000007402,ENSG00000034152,ENSG00000038532,ENSG00000039523,ENSG00000042493,ENSG00000046651,ENSG00000061273,ENSG00000065833,ENSG00000067225,ENSG00000068323,ENSG00000068394,ENSG00000072501,ENSG00000072786,ENSG00000075624,ENSG00000076043,ENSG00000076716,ENSG00000077150,ENSG00000077274,ENSG00000077721,ENSG00000082458,ENSG00000087842,ENSG00000096060,ENSG00000096080,ENSG00000099246…
424	rna	positive	TF	Factor: MAF; motif: NGCTGAGTCAN	TF:M00983	0.018559719598287627	1790	531	183	6295	ENSG00000004059,ENSG00000007402,ENSG00000034152,ENSG00000038532,ENSG00000039523,ENSG00000042493,ENSG00000046651,ENSG00000061273,ENSG00000065833,ENSG00000067225,ENSG00000068323,ENSG00000068394,ENSG00000072501,ENSG00000072786,ENSG00000075624,ENSG00000076043,ENSG00000076716,ENSG00000077150,ENSG00000077274,ENSG00000077721,ENSG00000082458,ENSG00000087842,ENSG00000096060,ENSG00000096080,ENSG00000099246…
425	rna	positive	TF	Factor: PLAG1; motif: GRGGCNNHNNNRRGGG	TF:M01778	0.018598381293904256	1024	531	113	6295	ENSG00000005302,ENSG00000007402,ENSG00000007866,ENSG00000014216,ENSG00000038532,ENSG00000056998,ENSG00000061273,ENSG00000063601,ENSG00000063660,ENSG00000067113,ENSG00000070718,ENSG00000072062,ENSG00000072682,ENSG00000075624,ENSG00000076706,ENSG00000082458,ENSG00000087842,ENSG00000092820,ENSG00000101335,ENSG00000102024,ENSG00000102098,ENSG00000102221,ENSG00000103187,ENSG00000104093,ENSG00000104833…
426	rna	positive	TF	Factor: PLAG1; motif: GRGGCNNHNNNRRGGG; match class: 0	TF:M01778_0	0.018598381293904256	1024	531	113	6295	ENSG00000005302,ENSG00000007402,ENSG00000007866,ENSG00000014216,ENSG00000038532,ENSG00000056998,ENSG00000061273,ENSG00000063601,ENSG00000063660,ENSG00000067113,ENSG00000070718,ENSG00000072062,ENSG00000072682,ENSG00000075624,ENSG00000076706,ENSG00000082458,ENSG00000087842,ENSG00000092820,ENSG00000101335,ENSG00000102024,ENSG00000102098,ENSG00000102221,ENSG00000103187,ENSG00000104093,ENSG00000104833…
427	rna	positive	TF	Factor: AP-2alpha; motif: NNNGSCCTGRGGSN; match class: 1	TF:M04896_1	0.018985756201333075	391	531	51	6295	ENSG00000047230,ENSG00000052344,ENSG00000055483,ENSG00000072786,ENSG00000082458,ENSG00000100097,ENSG00000101246,ENSG00000101347,ENSG00000102401,ENSG00000104833,ENSG00000105379,ENSG00000106605,ENSG00000111275,ENSG00000117877,ENSG00000118898,ENSG00000120265,ENSG00000123472,ENSG00000124596,ENSG00000124839,ENSG00000125503,ENSG00000126107,ENSG00000130479,ENSG00000130762,ENSG00000131435,ENSG00000140416…
428	rna	positive	TF	Factor: E2F-3; motif: GGCGGGN; match class: 1	TF:M02089_1	0.019274655595167424	3883	531	361	6295	ENSG00000004059,ENSG00000005022,ENSG00000005302,ENSG00000006757,ENSG00000007402,ENSG00000007866,ENSG00000014216,ENSG00000022267,ENSG00000024422,ENSG00000029993,ENSG00000034152,ENSG00000038532,ENSG00000039523,ENSG00000042493,ENSG00000044446,ENSG00000046647,ENSG00000046651,ENSG00000048028,ENSG00000055483,ENSG00000056277,ENSG00000056998,ENSG00000061273,ENSG00000063241,ENSG00000063601,ENSG00000063660…
429	rna	positive	TF	Factor: HIC1; motif: NSNNNNTGCCCSSNN; match class: 0	TF:M01072_0	0.020062793780659817	1515	531	158	6295	ENSG00000004961,ENSG00000007402,ENSG00000007866,ENSG00000022267,ENSG00000029993,ENSG00000031698,ENSG00000039523,ENSG00000046647,ENSG00000056998,ENSG00000063660,ENSG00000067113,ENSG00000067225,ENSG00000067992,ENSG00000068366,ENSG00000070770,ENSG00000072506,ENSG00000075624,ENSG00000076706,ENSG00000077454,ENSG00000078304,ENSG00000086712,ENSG00000088808,ENSG00000092148,ENSG00000095380,ENSG00000096717…
430	rna	positive	TF	Factor: HIC1; motif: NSNNNNTGCCCSSNN	TF:M01072	0.020062793780659817	1515	531	158	6295	ENSG00000004961,ENSG00000007402,ENSG00000007866,ENSG00000022267,ENSG00000029993,ENSG00000031698,ENSG00000039523,ENSG00000046647,ENSG00000056998,ENSG00000063660,ENSG00000067113,ENSG00000067225,ENSG00000067992,ENSG00000068366,ENSG00000070770,ENSG00000072506,ENSG00000075624,ENSG00000076706,ENSG00000077454,ENSG00000078304,ENSG00000086712,ENSG00000088808,ENSG00000092148,ENSG00000095380,ENSG00000096717…
431	rna	positive	TF	Factor: NF-KAPPAB1; motif: NGGKRNTTYCCCN	TF:M08952	0.020810428332894308	2572	531	251	6295	ENSG00000003509,ENSG00000005022,ENSG00000006757,ENSG00000007866,ENSG00000014216,ENSG00000019582,ENSG00000029993,ENSG00000034152,ENSG00000042493,ENSG00000044446,ENSG00000046651,ENSG00000047230,ENSG00000052344,ENSG00000058668,ENSG00000063660,ENSG00000065833,ENSG00000067992,ENSG00000068323,ENSG00000068400,ENSG00000070718,ENSG00000071127,ENSG00000071859,ENSG00000072682,ENSG00000072786,ENSG00000075624…
432	rna	positive	TF	Factor: NF-KAPPAB1; motif: NGGKRNTTYCCCN; match class: 0	TF:M08952_0	0.020810428332894308	2572	531	251	6295	ENSG00000003509,ENSG00000005022,ENSG00000006757,ENSG00000007866,ENSG00000014216,ENSG00000019582,ENSG00000029993,ENSG00000034152,ENSG00000042493,ENSG00000044446,ENSG00000046651,ENSG00000047230,ENSG00000052344,ENSG00000058668,ENSG00000063660,ENSG00000065833,ENSG00000067992,ENSG00000068323,ENSG00000068400,ENSG00000070718,ENSG00000071127,ENSG00000071859,ENSG00000072682,ENSG00000072786,ENSG00000075624…
433	rna	positive	TF	Factor: KLF3; motif: CCMCRCCCNG	TF:M07460	0.02082112225065012	422	531	54	6295	ENSG00000004059,ENSG00000007402,ENSG00000019582,ENSG00000052344,ENSG00000063660,ENSG00000072682,ENSG00000092820,ENSG00000101160,ENSG00000102024,ENSG00000102038,ENSG00000105379,ENSG00000107130,ENSG00000108821,ENSG00000117450,ENSG00000117676,ENSG00000120860,ENSG00000123240,ENSG00000124357,ENSG00000124942,ENSG00000125351,ENSG00000125970,ENSG00000126247,ENSG00000130021,ENSG00000130177,ENSG00000130985…
434	rna	positive	TF	Factor: KLF3; motif: CCMCRCCCNG; match class: 0	TF:M07460_0	0.02082112225065012	422	531	54	6295	ENSG00000004059,ENSG00000007402,ENSG00000019582,ENSG00000052344,ENSG00000063660,ENSG00000072682,ENSG00000092820,ENSG00000101160,ENSG00000102024,ENSG00000102038,ENSG00000105379,ENSG00000107130,ENSG00000108821,ENSG00000117450,ENSG00000117676,ENSG00000120860,ENSG00000123240,ENSG00000124357,ENSG00000124942,ENSG00000125351,ENSG00000125970,ENSG00000126247,ENSG00000130021,ENSG00000130177,ENSG00000130985…
435	rna	positive	TF	Factor: SP1; motif: RCCMCRCCCMC	TF:M03920	0.022224413948307282	3021	531	289	6295	ENSG00000004059,ENSG00000005022,ENSG00000005302,ENSG00000007866,ENSG00000022267,ENSG00000029993,ENSG00000034152,ENSG00000039523,ENSG00000044446,ENSG00000048028,ENSG00000052344,ENSG00000055483,ENSG00000056998,ENSG00000061273,ENSG00000063241,ENSG00000063660,ENSG00000066629,ENSG00000067113,ENSG00000067992,ENSG00000068323,ENSG00000068400,ENSG00000070718,ENSG00000070770,ENSG00000071127,ENSG00000071282…
436	rna	positive	TF	Factor: SP1; motif: RCCMCRCCCMC; match class: 0	TF:M03920_0	0.022224413948307282	3021	531	289	6295	ENSG00000004059,ENSG00000005022,ENSG00000005302,ENSG00000007866,ENSG00000022267,ENSG00000029993,ENSG00000034152,ENSG00000039523,ENSG00000044446,ENSG00000048028,ENSG00000052344,ENSG00000055483,ENSG00000056998,ENSG00000061273,ENSG00000063241,ENSG00000063660,ENSG00000066629,ENSG00000067113,ENSG00000067992,ENSG00000068323,ENSG00000068400,ENSG00000070718,ENSG00000070770,ENSG00000071127,ENSG00000071282…
437	rna	positive	TF	Factor: SP8; motif: RCCACGCCCMCY; match class: 0	TF:M03923_0	0.022360709235377783	998	531	110	6295	ENSG00000031698,ENSG00000046647,ENSG00000063241,ENSG00000067992,ENSG00000068323,ENSG00000071127,ENSG00000071282,ENSG00000072506,ENSG00000076716,ENSG00000076944,ENSG00000077454,ENSG00000078808,ENSG00000082458,ENSG00000089159,ENSG00000101335,ENSG00000101849,ENSG00000101868,ENSG00000101911,ENSG00000101935,ENSG00000101966,ENSG00000102024,ENSG00000102103,ENSG00000102241,ENSG00000102316,ENSG00000103274…
438	rna	positive	TF	Factor: SP8; motif: RCCACGCCCMCY	TF:M03923	0.022360709235377783	998	531	110	6295	ENSG00000031698,ENSG00000046647,ENSG00000063241,ENSG00000067992,ENSG00000068323,ENSG00000071127,ENSG00000071282,ENSG00000072506,ENSG00000076716,ENSG00000076944,ENSG00000077454,ENSG00000078808,ENSG00000082458,ENSG00000089159,ENSG00000101335,ENSG00000101849,ENSG00000101868,ENSG00000101911,ENSG00000101935,ENSG00000101966,ENSG00000102024,ENSG00000102103,ENSG00000102241,ENSG00000102316,ENSG00000103274…
439	rna	positive	TF	Factor: SP4; motif: NWRGCCACGCCCMCTYN; match class: 1	TF:M03922_1	0.023196689394162702	946	531	105	6295	ENSG00000005302,ENSG00000007866,ENSG00000034152,ENSG00000044446,ENSG00000048028,ENSG00000063241,ENSG00000068323,ENSG00000070718,ENSG00000072682,ENSG00000075624,ENSG00000077721,ENSG00000088808,ENSG00000089159,ENSG00000099940,ENSG00000100417,ENSG00000101335,ENSG00000102054,ENSG00000102103,ENSG00000102119,ENSG00000102178,ENSG00000102226,ENSG00000102580,ENSG00000103150,ENSG00000103187,ENSG00000103274…
440	rna	positive	TF	Factor: LRF; motif: NGKGGGTSNCN; match class: 1	TF:M07387_1	0.02351986789613355	376	531	49	6295	ENSG00000005302,ENSG00000034152,ENSG00000039523,ENSG00000065833,ENSG00000072062,ENSG00000072786,ENSG00000077454,ENSG00000089159,ENSG00000100092,ENSG00000100097,ENSG00000102241,ENSG00000105088,ENSG00000106077,ENSG00000106605,ENSG00000108828,ENSG00000110651,ENSG00000116017,ENSG00000117877,ENSG00000123131,ENSG00000126458,ENSG00000127564,ENSG00000130005,ENSG00000130479,ENSG00000130703,ENSG00000131828…
441	rna	positive	TF	Factor: SP2; motif: GGGCGGGAC	TF:M01783	0.02388434382090065	3697	531	345	6295	ENSG00000004059,ENSG00000004961,ENSG00000005022,ENSG00000005302,ENSG00000006757,ENSG00000007866,ENSG00000014216,ENSG00000022267,ENSG00000024422,ENSG00000029993,ENSG00000031698,ENSG00000034152,ENSG00000038532,ENSG00000039523,ENSG00000044446,ENSG00000046647,ENSG00000046651,ENSG00000048028,ENSG00000052344,ENSG00000056998,ENSG00000058668,ENSG00000061273,ENSG00000063241,ENSG00000063660,ENSG00000065833…
442	rna	positive	TF	Factor: SP2; motif: GGGCGGGAC; match class: 0	TF:M01783_0	0.02388434382090065	3697	531	345	6295	ENSG00000004059,ENSG00000004961,ENSG00000005022,ENSG00000005302,ENSG00000006757,ENSG00000007866,ENSG00000014216,ENSG00000022267,ENSG00000024422,ENSG00000029993,ENSG00000031698,ENSG00000034152,ENSG00000038532,ENSG00000039523,ENSG00000044446,ENSG00000046647,ENSG00000046651,ENSG00000048028,ENSG00000052344,ENSG00000056998,ENSG00000058668,ENSG00000061273,ENSG00000063241,ENSG00000063660,ENSG00000065833…
443	rna	positive	TF	Factor: JUNB:C-JUN; motif: NATGACKCAT	TF:M08944	0.02400370070807401	1511	531	157	6295	ENSG00000034152,ENSG00000039523,ENSG00000042493,ENSG00000046651,ENSG00000055483,ENSG00000061273,ENSG00000065833,ENSG00000067225,ENSG00000068323,ENSG00000068394,ENSG00000068400,ENSG00000071127,ENSG00000072786,ENSG00000076043,ENSG00000077150,ENSG00000077274,ENSG00000078304,ENSG00000087842,ENSG00000096060,ENSG00000096080,ENSG00000099246,ENSG00000101868,ENSG00000101871,ENSG00000101882,ENSG00000101901…
444	rna	positive	TF	Factor: JUNB:C-JUN; motif: NATGACKCAT; match class: 0	TF:M08944_0	0.02400370070807401	1511	531	157	6295	ENSG00000034152,ENSG00000039523,ENSG00000042493,ENSG00000046651,ENSG00000055483,ENSG00000061273,ENSG00000065833,ENSG00000067225,ENSG00000068323,ENSG00000068394,ENSG00000068400,ENSG00000071127,ENSG00000072786,ENSG00000076043,ENSG00000077150,ENSG00000077274,ENSG00000078304,ENSG00000087842,ENSG00000096060,ENSG00000096080,ENSG00000099246,ENSG00000101868,ENSG00000101871,ENSG00000101882,ENSG00000101901…
445	rna	positive	TF	Factor: HDAC1; motif: KGCARGGTC; match class: 0	TF:M07041_0	0.024540961780097296	4104	531	378	6295	ENSG00000004059,ENSG00000004961,ENSG00000005302,ENSG00000006757,ENSG00000007402,ENSG00000014216,ENSG00000019582,ENSG00000022267,ENSG00000024422,ENSG00000029993,ENSG00000031698,ENSG00000034152,ENSG00000039523,ENSG00000044446,ENSG00000046647,ENSG00000046651,ENSG00000047230,ENSG00000052344,ENSG00000055483,ENSG00000056998,ENSG00000058668,ENSG00000061273,ENSG00000063241,ENSG00000063601,ENSG00000063660…
446	rna	positive	TF	Factor: HDAC1; motif: KGCARGGTC	TF:M07041	0.024540961780097296	4104	531	378	6295	ENSG00000004059,ENSG00000004961,ENSG00000005302,ENSG00000006757,ENSG00000007402,ENSG00000014216,ENSG00000019582,ENSG00000022267,ENSG00000024422,ENSG00000029993,ENSG00000031698,ENSG00000034152,ENSG00000039523,ENSG00000044446,ENSG00000046647,ENSG00000046651,ENSG00000047230,ENSG00000052344,ENSG00000055483,ENSG00000056998,ENSG00000058668,ENSG00000061273,ENSG00000063241,ENSG00000063601,ENSG00000063660…
447	rna	positive	TF	Factor: RelA-p65; motif: BCWGGGRANNK	TF:M04811	0.025512441928767598	2189	531	217	6295	ENSG00000003509,ENSG00000004961,ENSG00000006757,ENSG00000007402,ENSG00000014216,ENSG00000022267,ENSG00000024422,ENSG00000029993,ENSG00000039523,ENSG00000042493,ENSG00000044446,ENSG00000047230,ENSG00000055483,ENSG00000061273,ENSG00000063601,ENSG00000067113,ENSG00000068394,ENSG00000069869,ENSG00000070718,ENSG00000070770,ENSG00000071282,ENSG00000071859,ENSG00000072501,ENSG00000072682,ENSG00000072786…
448	rna	positive	TF	Factor: RelA-p65; motif: BCWGGGRANNK; match class: 0	TF:M04811_0	0.025512441928767598	2189	531	217	6295	ENSG00000003509,ENSG00000004961,ENSG00000006757,ENSG00000007402,ENSG00000014216,ENSG00000022267,ENSG00000024422,ENSG00000029993,ENSG00000039523,ENSG00000042493,ENSG00000044446,ENSG00000047230,ENSG00000055483,ENSG00000061273,ENSG00000063601,ENSG00000067113,ENSG00000068394,ENSG00000069869,ENSG00000070718,ENSG00000070770,ENSG00000071282,ENSG00000071859,ENSG00000072501,ENSG00000072682,ENSG00000072786…
449	rna	positive	TF	Factor: TWIST; motif: CACCTGG; match class: 0	TF:M03582_0	0.025669609937245687	2547	531	248	6295	ENSG00000004059,ENSG00000005302,ENSG00000014216,ENSG00000024422,ENSG00000031698,ENSG00000034152,ENSG00000039523,ENSG00000042493,ENSG00000044446,ENSG00000046647,ENSG00000048028,ENSG00000052344,ENSG00000055483,ENSG00000056277,ENSG00000056998,ENSG00000063241,ENSG00000063601,ENSG00000065833,ENSG00000067225,ENSG00000070718,ENSG00000072501,ENSG00000072506,ENSG00000072682,ENSG00000075624,ENSG00000076716…
450	rna	positive	TF	Factor: TWIST; motif: CACCTGG	TF:M03582	0.025669609937245687	2547	531	248	6295	ENSG00000004059,ENSG00000005302,ENSG00000014216,ENSG00000024422,ENSG00000031698,ENSG00000034152,ENSG00000039523,ENSG00000042493,ENSG00000044446,ENSG00000046647,ENSG00000048028,ENSG00000052344,ENSG00000055483,ENSG00000056277,ENSG00000056998,ENSG00000063241,ENSG00000063601,ENSG00000065833,ENSG00000067225,ENSG00000070718,ENSG00000072501,ENSG00000072506,ENSG00000072682,ENSG00000075624,ENSG00000076716…
451	rna	positive	TF	Factor: CTCFL; motif: CNSCAGGGGGCRSN; match class: 0	TF:M09769_0	0.02924813504585168	285	531	39	6295	ENSG00000005302,ENSG00000042493,ENSG00000063241,ENSG00000070770,ENSG00000075624,ENSG00000076944,ENSG00000101901,ENSG00000102119,ENSG00000103187,ENSG00000106397,ENSG00000107130,ENSG00000108821,ENSG00000108829,ENSG00000111275,ENSG00000111679,ENSG00000116478,ENSG00000126391,ENSG00000130775,ENSG00000136802,ENSG00000143320,ENSG00000143545,ENSG00000148572,ENSG00000158710,ENSG00000161011,ENSG00000162522…
452	rna	positive	TF	Factor: CTCFL; motif: CNSCAGGGGGCRSN	TF:M09769	0.02924813504585168	285	531	39	6295	ENSG00000005302,ENSG00000042493,ENSG00000063241,ENSG00000070770,ENSG00000075624,ENSG00000076944,ENSG00000101901,ENSG00000102119,ENSG00000103187,ENSG00000106397,ENSG00000107130,ENSG00000108821,ENSG00000108829,ENSG00000111275,ENSG00000111679,ENSG00000116478,ENSG00000126391,ENSG00000130775,ENSG00000136802,ENSG00000143320,ENSG00000143545,ENSG00000148572,ENSG00000158710,ENSG00000161011,ENSG00000162522…
453	rna	positive	TF	Factor: Egr-1; motif: ACCGCCC; match class: 1	TF:M04918_1	0.030614517914669213	570	531	68	6295	ENSG00000007402,ENSG00000056277,ENSG00000067225,ENSG00000071859,ENSG00000078808,ENSG00000089159,ENSG00000102119,ENSG00000102178,ENSG00000102218,ENSG00000102221,ENSG00000104714,ENSG00000105221,ENSG00000105223,ENSG00000107130,ENSG00000116670,ENSG00000116954,ENSG00000117592,ENSG00000124357,ENSG00000124486,ENSG00000124507,ENSG00000124659,ENSG00000124942,ENSG00000125503,ENSG00000125733,ENSG00000125970…
454	rna	positive	TF	Factor: LRF; motif: GGGGKYNNB	TF:M01100	0.030614517914669213	2601	531	252	6295	ENSG00000004059,ENSG00000005302,ENSG00000007402,ENSG00000007866,ENSG00000014216,ENSG00000019582,ENSG00000022267,ENSG00000024422,ENSG00000029993,ENSG00000038532,ENSG00000042493,ENSG00000044446,ENSG00000046647,ENSG00000046653,ENSG00000056998,ENSG00000061273,ENSG00000063241,ENSG00000063601,ENSG00000063660,ENSG00000065833,ENSG00000067992,ENSG00000068323,ENSG00000070718,ENSG00000070770,ENSG00000071127…
455	rna	positive	TF	Factor: LRF; motif: GGGGKYNNB; match class: 0	TF:M01100_0	0.030614517914669213	2601	531	252	6295	ENSG00000004059,ENSG00000005302,ENSG00000007402,ENSG00000007866,ENSG00000014216,ENSG00000019582,ENSG00000022267,ENSG00000024422,ENSG00000029993,ENSG00000038532,ENSG00000042493,ENSG00000044446,ENSG00000046647,ENSG00000046653,ENSG00000056998,ENSG00000061273,ENSG00000063241,ENSG00000063601,ENSG00000063660,ENSG00000065833,ENSG00000067992,ENSG00000068323,ENSG00000070718,ENSG00000070770,ENSG00000071127…
456	rna	positive	TF	Factor: SP1:SP3; motif: CCSCCCCCYCC; match class: 0	TF:M01219_0	0.030614517914669213	2753	531	265	6295	ENSG00000004059,ENSG00000005302,ENSG00000006757,ENSG00000007402,ENSG00000007866,ENSG00000029993,ENSG00000039523,ENSG00000042493,ENSG00000046651,ENSG00000048028,ENSG00000056277,ENSG00000061273,ENSG00000063241,ENSG00000063601,ENSG00000063660,ENSG00000066629,ENSG00000068323,ENSG00000068394,ENSG00000068400,ENSG00000069869,ENSG00000070718,ENSG00000070770,ENSG00000071282,ENSG00000072682,ENSG00000072786…
457	rna	positive	TF	Factor: SP1:SP3; motif: CCSCCCCCYCC	TF:M01219	0.030614517914669213	2753	531	265	6295	ENSG00000004059,ENSG00000005302,ENSG00000006757,ENSG00000007402,ENSG00000007866,ENSG00000029993,ENSG00000039523,ENSG00000042493,ENSG00000046651,ENSG00000048028,ENSG00000056277,ENSG00000061273,ENSG00000063241,ENSG00000063601,ENSG00000063660,ENSG00000066629,ENSG00000068323,ENSG00000068394,ENSG00000068400,ENSG00000069869,ENSG00000070718,ENSG00000070770,ENSG00000071282,ENSG00000072682,ENSG00000072786…
458	rna	positive	TF	Factor: Fra-1; motif: NRTGACTCATN; match class: 0	TF:M09615_0	0.03093882280805555	1170	531	125	6295	ENSG00000034152,ENSG00000039523,ENSG00000042493,ENSG00000061273,ENSG00000065833,ENSG00000067225,ENSG00000068323,ENSG00000068394,ENSG00000072786,ENSG00000076043,ENSG00000077150,ENSG00000077274,ENSG00000087842,ENSG00000096060,ENSG00000096080,ENSG00000099246,ENSG00000101868,ENSG00000101871,ENSG00000101935,ENSG00000101966,ENSG00000102054,ENSG00000102098,ENSG00000102225,ENSG00000102230,ENSG00000102858…
459	rna	positive	TF	Factor: Fra-1; motif: NRTGACTCATN	TF:M09615	0.03093882280805555	1170	531	125	6295	ENSG00000034152,ENSG00000039523,ENSG00000042493,ENSG00000061273,ENSG00000065833,ENSG00000067225,ENSG00000068323,ENSG00000068394,ENSG00000072786,ENSG00000076043,ENSG00000077150,ENSG00000077274,ENSG00000087842,ENSG00000096060,ENSG00000096080,ENSG00000099246,ENSG00000101868,ENSG00000101871,ENSG00000101935,ENSG00000101966,ENSG00000102054,ENSG00000102098,ENSG00000102225,ENSG00000102230,ENSG00000102858…
460	rna	positive	TF	Factor: SZF1-1; motif: CCAGGGTAWCAGCNG; match class: 0	TF:M01109_0	0.03235409179027389	1335	531	140	6295	ENSG00000003509,ENSG00000007402,ENSG00000007866,ENSG00000014216,ENSG00000024422,ENSG00000038532,ENSG00000039523,ENSG00000046651,ENSG00000048028,ENSG00000052344,ENSG00000055483,ENSG00000063660,ENSG00000065833,ENSG00000070718,ENSG00000071127,ENSG00000071859,ENSG00000075624,ENSG00000076716,ENSG00000077454,ENSG00000083444,ENSG00000086712,ENSG00000088808,ENSG00000099246,ENSG00000099940,ENSG00000100092…
461	rna	positive	TF	Factor: SZF1-1; motif: CCAGGGTAWCAGCNG	TF:M01109	0.03235409179027389	1335	531	140	6295	ENSG00000003509,ENSG00000007402,ENSG00000007866,ENSG00000014216,ENSG00000024422,ENSG00000038532,ENSG00000039523,ENSG00000046651,ENSG00000048028,ENSG00000052344,ENSG00000055483,ENSG00000063660,ENSG00000065833,ENSG00000070718,ENSG00000071127,ENSG00000071859,ENSG00000075624,ENSG00000076716,ENSG00000077454,ENSG00000083444,ENSG00000086712,ENSG00000088808,ENSG00000099246,ENSG00000099940,ENSG00000100092…
462	rna	positive	TF	Factor: BTEB2; motif: GCCCCRCCCH; match class: 1	TF:M07409_1	0.03315698230408129	799	531	90	6295	ENSG00000007866,ENSG00000022267,ENSG00000029993,ENSG00000039523,ENSG00000044446,ENSG00000048028,ENSG00000063660,ENSG00000070770,ENSG00000071859,ENSG00000077721,ENSG00000088808,ENSG00000089159,ENSG00000095380,ENSG00000100417,ENSG00000101335,ENSG00000102054,ENSG00000102103,ENSG00000102119,ENSG00000102580,ENSG00000103274,ENSG00000104714,ENSG00000105088,ENSG00000105321,ENSG00000105767,ENSG00000106605…
463	rna	positive	TF	Factor: Bach2; motif: SRTGAGTCANC	TF:M00490	0.03336771824286392	169	531	26	6295	ENSG00000068323,ENSG00000096080,ENSG00000105767,ENSG00000119888,ENSG00000120885,ENSG00000125733,ENSG00000125868,ENSG00000130176,ENSG00000130479,ENSG00000135424,ENSG00000140650,ENSG00000140694,ENSG00000143320,ENSG00000143545,ENSG00000147050,ENSG00000158526,ENSG00000158710,ENSG00000160789,ENSG00000163902,ENSG00000170439,ENSG00000175416,ENSG00000176485,ENSG00000177106,ENSG00000177697,ENSG00000182718…
464	rna	positive	TF	Factor: Bach2; motif: SRTGAGTCANC; match class: 0	TF:M00490_0	0.03336771824286392	169	531	26	6295	ENSG00000068323,ENSG00000096080,ENSG00000105767,ENSG00000119888,ENSG00000120885,ENSG00000125733,ENSG00000125868,ENSG00000130176,ENSG00000130479,ENSG00000135424,ENSG00000140650,ENSG00000140694,ENSG00000143320,ENSG00000143545,ENSG00000147050,ENSG00000158526,ENSG00000158710,ENSG00000160789,ENSG00000163902,ENSG00000170439,ENSG00000175416,ENSG00000176485,ENSG00000177106,ENSG00000177697,ENSG00000182718…
465	rna	positive	TF	Factor: GLI2; motif: GACCACCCACNNNG; match class: 0	TF:M03901_0	0.03340067977539782	297	531	40	6295	ENSG00000014216,ENSG00000039523,ENSG00000058668,ENSG00000065833,ENSG00000068366,ENSG00000076706,ENSG00000077150,ENSG00000100097,ENSG00000100417,ENSG00000101911,ENSG00000105088,ENSG00000107438,ENSG00000110435,ENSG00000110651,ENSG00000111679,ENSG00000117676,ENSG00000119888,ENSG00000122126,ENSG00000130177,ENSG00000132394,ENSG00000135046,ENSG00000135148,ENSG00000136167,ENSG00000136986,ENSG00000140650…
466	rna	positive	TF	Factor: GLI2; motif: GACCACCCACNNNG	TF:M03901	0.03340067977539782	297	531	40	6295	ENSG00000014216,ENSG00000039523,ENSG00000058668,ENSG00000065833,ENSG00000068366,ENSG00000076706,ENSG00000077150,ENSG00000100097,ENSG00000100417,ENSG00000101911,ENSG00000105088,ENSG00000107438,ENSG00000110435,ENSG00000110651,ENSG00000111679,ENSG00000117676,ENSG00000119888,ENSG00000122126,ENSG00000130177,ENSG00000132394,ENSG00000135046,ENSG00000135148,ENSG00000136167,ENSG00000136986,ENSG00000140650…
467	rna	positive	TF	Factor: KLF3; motif: CCMCACCCNG	TF:M03553	0.033457171803364105	644	531	75	6295	ENSG00000004059,ENSG00000029993,ENSG00000039523,ENSG00000063660,ENSG00000067225,ENSG00000072682,ENSG00000077454,ENSG00000092820,ENSG00000096717,ENSG00000101160,ENSG00000102024,ENSG00000102038,ENSG00000102580,ENSG00000104714,ENSG00000104833,ENSG00000105088,ENSG00000105379,ENSG00000108821,ENSG00000110651,ENSG00000116774,ENSG00000123562,ENSG00000124839,ENSG00000125351,ENSG00000125753,ENSG00000126012…
468	rna	positive	TF	Factor: KLF3; motif: CCMCACCCNG; match class: 0	TF:M03553_0	0.033457171803364105	644	531	75	6295	ENSG00000004059,ENSG00000029993,ENSG00000039523,ENSG00000063660,ENSG00000067225,ENSG00000072682,ENSG00000077454,ENSG00000092820,ENSG00000096717,ENSG00000101160,ENSG00000102024,ENSG00000102038,ENSG00000102580,ENSG00000104714,ENSG00000104833,ENSG00000105088,ENSG00000105379,ENSG00000108821,ENSG00000110651,ENSG00000116774,ENSG00000123562,ENSG00000124839,ENSG00000125351,ENSG00000125753,ENSG00000126012…
469	rna	positive	TF	Factor: ZNF644; motif: TCCWGCCTCTSN	TF:M09737	0.03405303366444457	2145	531	212	6295	ENSG00000005302,ENSG00000007402,ENSG00000007866,ENSG00000019582,ENSG00000022267,ENSG00000024422,ENSG00000029993,ENSG00000034152,ENSG00000044446,ENSG00000046651,ENSG00000058668,ENSG00000063241,ENSG00000067113,ENSG00000067225,ENSG00000067992,ENSG00000068366,ENSG00000071282,ENSG00000071859,ENSG00000072062,ENSG00000076716,ENSG00000076944,ENSG00000077150,ENSG00000077454,ENSG00000077721,ENSG00000082458…
470	rna	positive	TF	Factor: LF-A1; motif: GGGSTCWR	TF:M00646	0.03405303366444457	4144	531	380	6295	ENSG00000003509,ENSG00000004059,ENSG00000004961,ENSG00000005022,ENSG00000005302,ENSG00000006757,ENSG00000007866,ENSG00000014216,ENSG00000019582,ENSG00000022267,ENSG00000024422,ENSG00000029993,ENSG00000031698,ENSG00000034152,ENSG00000038532,ENSG00000039523,ENSG00000042493,ENSG00000044446,ENSG00000046647,ENSG00000047230,ENSG00000048028,ENSG00000052344,ENSG00000055483,ENSG00000056277,ENSG00000061273…
471	rna	positive	TF	Factor: LF-A1; motif: GGGSTCWR; match class: 0	TF:M00646_0	0.03405303366444457	4144	531	380	6295	ENSG00000003509,ENSG00000004059,ENSG00000004961,ENSG00000005022,ENSG00000005302,ENSG00000006757,ENSG00000007866,ENSG00000014216,ENSG00000019582,ENSG00000022267,ENSG00000024422,ENSG00000029993,ENSG00000031698,ENSG00000034152,ENSG00000038532,ENSG00000039523,ENSG00000042493,ENSG00000044446,ENSG00000046647,ENSG00000047230,ENSG00000048028,ENSG00000052344,ENSG00000055483,ENSG00000056277,ENSG00000061273…
472	rna	positive	TF	Factor: ZNF644; motif: TCCWGCCTCTSN; match class: 0	TF:M09737_0	0.03405303366444457	2145	531	212	6295	ENSG00000005302,ENSG00000007402,ENSG00000007866,ENSG00000019582,ENSG00000022267,ENSG00000024422,ENSG00000029993,ENSG00000034152,ENSG00000044446,ENSG00000046651,ENSG00000058668,ENSG00000063241,ENSG00000067113,ENSG00000067225,ENSG00000067992,ENSG00000068366,ENSG00000071282,ENSG00000071859,ENSG00000072062,ENSG00000076716,ENSG00000076944,ENSG00000077150,ENSG00000077454,ENSG00000077721,ENSG00000082458…
473	rna	positive	TF	Factor: ZNF515; motif: WNSCCCCCWGCNG; match class: 1	TF:M08835_1	0.0342072897961168	135	531	22	6295	ENSG00000072062,ENSG00000076944,ENSG00000088305,ENSG00000099940,ENSG00000100097,ENSG00000102096,ENSG00000102119,ENSG00000105088,ENSG00000108821,ENSG00000108830,ENSG00000132323,ENSG00000136943,ENSG00000154917,ENSG00000160410,ENSG00000162522,ENSG00000165912,ENSG00000166925,ENSG00000181029,ENSG00000183943,ENSG00000187608,ENSG00000241973,ENSG00000247596
474	rna	positive	TF	Factor: Tax/CREB; motif: RTGACGCATAYCCCC; match class: 1	TF:M00115_1	0.03432092280014568	1002	531	109	6295	ENSG00000005022,ENSG00000007866,ENSG00000029993,ENSG00000031698,ENSG00000055483,ENSG00000061273,ENSG00000068323,ENSG00000071127,ENSG00000076043,ENSG00000076716,ENSG00000077150,ENSG00000077454,ENSG00000078808,ENSG00000088305,ENSG00000096080,ENSG00000100092,ENSG00000101160,ENSG00000101335,ENSG00000101811,ENSG00000102172,ENSG00000102316,ENSG00000103111,ENSG00000103187,ENSG00000103274,ENSG00000104093…
475	rna	positive	TF	Factor: SP4; motif: NWRGCCACGCCCMCTYN; match class: 0	TF:M03922_0	0.03432092280014568	2561	531	248	6295	ENSG00000004059,ENSG00000005302,ENSG00000007866,ENSG00000022267,ENSG00000029993,ENSG00000034152,ENSG00000039523,ENSG00000044446,ENSG00000048028,ENSG00000052344,ENSG00000063241,ENSG00000066629,ENSG00000067113,ENSG00000068323,ENSG00000070718,ENSG00000071127,ENSG00000071282,ENSG00000072062,ENSG00000072506,ENSG00000072682,ENSG00000075624,ENSG00000076944,ENSG00000077150,ENSG00000077721,ENSG00000078808…
476	rna	positive	TF	Factor: SP4; motif: NWRGCCACGCCCMCTYN	TF:M03922	0.03432092280014568	2561	531	248	6295	ENSG00000004059,ENSG00000005302,ENSG00000007866,ENSG00000022267,ENSG00000029993,ENSG00000034152,ENSG00000039523,ENSG00000044446,ENSG00000048028,ENSG00000052344,ENSG00000063241,ENSG00000066629,ENSG00000067113,ENSG00000068323,ENSG00000070718,ENSG00000071127,ENSG00000071282,ENSG00000072062,ENSG00000072506,ENSG00000072682,ENSG00000075624,ENSG00000076944,ENSG00000077150,ENSG00000077721,ENSG00000078808…
477	rna	positive	TF	Factor: SP1; motif: RCCMCRCCCMC; match class: 1	TF:M03920_1	0.035149792327396095	1328	531	139	6295	ENSG00000005302,ENSG00000007866,ENSG00000022267,ENSG00000029993,ENSG00000039523,ENSG00000044446,ENSG00000048028,ENSG00000063241,ENSG00000063660,ENSG00000068323,ENSG00000070718,ENSG00000070770,ENSG00000071127,ENSG00000071859,ENSG00000072062,ENSG00000076944,ENSG00000077721,ENSG00000083444,ENSG00000088808,ENSG00000089159,ENSG00000095380,ENSG00000100097,ENSG00000100417,ENSG00000101335,ENSG00000102054…
478	rna	positive	TF	Factor: AP-2alpha; motif: GCCNNNRGS; match class: 1	TF:M00469_1	0.03601312763468216	1296	531	136	6295	ENSG00000004059,ENSG00000005302,ENSG00000007866,ENSG00000014216,ENSG00000029993,ENSG00000039523,ENSG00000046647,ENSG00000048028,ENSG00000055483,ENSG00000061273,ENSG00000063660,ENSG00000065833,ENSG00000066629,ENSG00000067113,ENSG00000067992,ENSG00000068323,ENSG00000071127,ENSG00000077454,ENSG00000077721,ENSG00000078808,ENSG00000086712,ENSG00000088305,ENSG00000092820,ENSG00000096080,ENSG00000101882…
479	rna	positive	TF	Factor: Erm:E2A; motif: CASGTGNNNCGGAAGNN; match class: 1	TF:M08571_1	0.03613568770702389	1362	531	142	6295	ENSG00000004059,ENSG00000005022,ENSG00000014216,ENSG00000039523,ENSG00000046647,ENSG00000046651,ENSG00000055483,ENSG00000056998,ENSG00000063241,ENSG00000068366,ENSG00000071127,ENSG00000072062,ENSG00000072682,ENSG00000076706,ENSG00000077454,ENSG00000082458,ENSG00000083444,ENSG00000092820,ENSG00000100097,ENSG00000101160,ENSG00000101335,ENSG00000101347,ENSG00000101811,ENSG00000101849,ENSG00000101966…
480	rna	positive	TF	Factor: MAZ; motif: CCCTCCCYCYN	TF:M07297	0.03712426438913253	994	531	108	6295	ENSG00000007402,ENSG00000007866,ENSG00000014216,ENSG00000024422,ENSG00000031698,ENSG00000039523,ENSG00000048028,ENSG00000052344,ENSG00000055483,ENSG00000061273,ENSG00000067225,ENSG00000071282,ENSG00000072062,ENSG00000072506,ENSG00000076716,ENSG00000077454,ENSG00000086712,ENSG00000092820,ENSG00000096060,ENSG00000100097,ENSG00000100417,ENSG00000101849,ENSG00000101850,ENSG00000102096,ENSG00000102316…
481	rna	positive	TF	Factor: MAZ; motif: CCCTCCCYCYN; match class: 0	TF:M07297_0	0.03712426438913253	994	531	108	6295	ENSG00000007402,ENSG00000007866,ENSG00000014216,ENSG00000024422,ENSG00000031698,ENSG00000039523,ENSG00000048028,ENSG00000052344,ENSG00000055483,ENSG00000061273,ENSG00000067225,ENSG00000071282,ENSG00000072062,ENSG00000072506,ENSG00000076716,ENSG00000077454,ENSG00000086712,ENSG00000092820,ENSG00000096060,ENSG00000100097,ENSG00000100417,ENSG00000101849,ENSG00000101850,ENSG00000102096,ENSG00000102316…
482	rna	positive	TF	Factor: AP-1; motif: TGACTCANNSKN; match class: 1	TF:M00924_1	0.03803852530270317	79	531	15	6295	ENSG00000120885,ENSG00000123130,ENSG00000125733,ENSG00000125753,ENSG00000126247,ENSG00000128591,ENSG00000131435,ENSG00000143545,ENSG00000158710,ENSG00000160789,ENSG00000161203,ENSG00000166173,ENSG00000167600,ENSG00000177106,ENSG00000186310
483	rna	positive	TF	Factor: SP1; motif: NRGKGGGCGGGGCN	TF:M09765	0.03837010635313198	3131	531	296	6295	ENSG00000004059,ENSG00000005302,ENSG00000007402,ENSG00000007866,ENSG00000022267,ENSG00000029993,ENSG00000034152,ENSG00000038532,ENSG00000039523,ENSG00000042493,ENSG00000044446,ENSG00000046651,ENSG00000048028,ENSG00000052344,ENSG00000055483,ENSG00000056277,ENSG00000056998,ENSG00000063241,ENSG00000063601,ENSG00000063660,ENSG00000066629,ENSG00000067113,ENSG00000067225,ENSG00000068400,ENSG00000070718…
484	rna	positive	TF	Factor: SP1; motif: NRGKGGGCGGGGCN; match class: 0	TF:M09765_0	0.03837010635313198	3131	531	296	6295	ENSG00000004059,ENSG00000005302,ENSG00000007402,ENSG00000007866,ENSG00000022267,ENSG00000029993,ENSG00000034152,ENSG00000038532,ENSG00000039523,ENSG00000042493,ENSG00000044446,ENSG00000046651,ENSG00000048028,ENSG00000052344,ENSG00000055483,ENSG00000056277,ENSG00000056998,ENSG00000063241,ENSG00000063601,ENSG00000063660,ENSG00000066629,ENSG00000067113,ENSG00000067225,ENSG00000068400,ENSG00000070718…
485	rna	positive	TF	Factor: JUND:FRA-2; motif: NATGACTCAT	TF:M08931	0.038496979365118415	387	531	49	6295	ENSG00000022267,ENSG00000065833,ENSG00000068323,ENSG00000068366,ENSG00000076043,ENSG00000077150,ENSG00000077274,ENSG00000096080,ENSG00000101966,ENSG00000102054,ENSG00000107372,ENSG00000108821,ENSG00000119888,ENSG00000120885,ENSG00000123130,ENSG00000124839,ENSG00000125970,ENSG00000126107,ENSG00000130176,ENSG00000130479,ENSG00000130985,ENSG00000131203,ENSG00000133083,ENSG00000135046,ENSG00000135241…
486	rna	positive	TF	Factor: ZNF228; motif: NKGGCCGTCKGA; match class: 0	TF:M06770_0	0.038496979365118415	4	531	3	6295	ENSG00000116661,ENSG00000151348,ENSG00000185437
487	rna	positive	TF	Factor: ZNF228; motif: NKGGCCGTCKGA	TF:M06770	0.038496979365118415	4	531	3	6295	ENSG00000116661,ENSG00000151348,ENSG00000185437
488	rna	positive	TF	Factor: ZFP30; motif: NKGGAATAAARA; match class: 0	TF:M05969_0	0.038496979365118415	4	531	3	6295	ENSG00000078808,ENSG00000125351,ENSG00000187867
489	rna	positive	TF	Factor: JUND:FRA-2; motif: NATGACTCAT; match class: 0	TF:M08931_0	0.038496979365118415	387	531	49	6295	ENSG00000022267,ENSG00000065833,ENSG00000068323,ENSG00000068366,ENSG00000076043,ENSG00000077150,ENSG00000077274,ENSG00000096080,ENSG00000101966,ENSG00000102054,ENSG00000107372,ENSG00000108821,ENSG00000119888,ENSG00000120885,ENSG00000123130,ENSG00000124839,ENSG00000125970,ENSG00000126107,ENSG00000130176,ENSG00000130479,ENSG00000130985,ENSG00000131203,ENSG00000133083,ENSG00000135046,ENSG00000135241…
490	rna	positive	TF	Factor: ZFP30; motif: NKGGAATAAARA	TF:M05969	0.038496979365118415	4	531	3	6295	ENSG00000078808,ENSG00000125351,ENSG00000187867
491	rna	positive	TF	Factor: DPF2; motif: NYCACYTCCYCNYYCY; match class: 0	TF:M09760_0	0.038496979365118415	2824	531	270	6295	ENSG00000003509,ENSG00000004961,ENSG00000005022,ENSG00000005302,ENSG00000007866,ENSG00000014216,ENSG00000022267,ENSG00000024422,ENSG00000029993,ENSG00000031698,ENSG00000044446,ENSG00000047230,ENSG00000048028,ENSG00000052344,ENSG00000056277,ENSG00000056998,ENSG00000058668,ENSG00000061273,ENSG00000063241,ENSG00000063601,ENSG00000065833,ENSG00000066629,ENSG00000068323,ENSG00000068366,ENSG00000069869…
492	rna	positive	TF	Factor: DPF2; motif: NYCACYTCCYCNYYCY	TF:M09760	0.038496979365118415	2824	531	270	6295	ENSG00000003509,ENSG00000004961,ENSG00000005022,ENSG00000005302,ENSG00000007866,ENSG00000014216,ENSG00000022267,ENSG00000024422,ENSG00000029993,ENSG00000031698,ENSG00000044446,ENSG00000047230,ENSG00000048028,ENSG00000052344,ENSG00000056277,ENSG00000056998,ENSG00000058668,ENSG00000061273,ENSG00000063241,ENSG00000063601,ENSG00000065833,ENSG00000066629,ENSG00000068323,ENSG00000068366,ENSG00000069869…
493	rna	positive	TF	Factor: MZF-1; motif: KNGNKAGGGGNAA	TF:M00084	0.039278665491387164	2164	531	213	6295	ENSG00000039523,ENSG00000046651,ENSG00000046653,ENSG00000048028,ENSG00000052344,ENSG00000058668,ENSG00000061273,ENSG00000063241,ENSG00000066629,ENSG00000067225,ENSG00000067992,ENSG00000068323,ENSG00000068400,ENSG00000070770,ENSG00000071282,ENSG00000072501,ENSG00000072682,ENSG00000076043,ENSG00000076706,ENSG00000077274,ENSG00000082458,ENSG00000083444,ENSG00000086712,ENSG00000088305,ENSG00000092820…
494	rna	positive	TF	Factor: MZF-1; motif: KNGNKAGGGGNAA; match class: 0	TF:M00084_0	0.039278665491387164	2164	531	213	6295	ENSG00000039523,ENSG00000046651,ENSG00000046653,ENSG00000048028,ENSG00000052344,ENSG00000058668,ENSG00000061273,ENSG00000063241,ENSG00000066629,ENSG00000067225,ENSG00000067992,ENSG00000068323,ENSG00000068400,ENSG00000070770,ENSG00000071282,ENSG00000072501,ENSG00000072682,ENSG00000076043,ENSG00000076706,ENSG00000077274,ENSG00000082458,ENSG00000083444,ENSG00000086712,ENSG00000088305,ENSG00000092820…
495	rna	positive	TF	Factor: SREBP-1; motif: CACSCCA	TF:M00749	0.039309332364266834	2615	531	252	6295	ENSG00000004059,ENSG00000007402,ENSG00000014216,ENSG00000034152,ENSG00000039523,ENSG00000044446,ENSG00000046647,ENSG00000047230,ENSG00000052344,ENSG00000056277,ENSG00000056998,ENSG00000058668,ENSG00000063241,ENSG00000063601,ENSG00000065833,ENSG00000067225,ENSG00000067992,ENSG00000068366,ENSG00000068394,ENSG00000068400,ENSG00000070718,ENSG00000070770,ENSG00000071282,ENSG00000072501,ENSG00000075624…
496	rna	positive	TF	Factor: SREBP-1; motif: CACSCCA; match class: 0	TF:M00749_0	0.039309332364266834	2615	531	252	6295	ENSG00000004059,ENSG00000007402,ENSG00000014216,ENSG00000034152,ENSG00000039523,ENSG00000044446,ENSG00000046647,ENSG00000047230,ENSG00000052344,ENSG00000056277,ENSG00000056998,ENSG00000058668,ENSG00000063241,ENSG00000063601,ENSG00000065833,ENSG00000067225,ENSG00000067992,ENSG00000068366,ENSG00000068394,ENSG00000068400,ENSG00000070718,ENSG00000070770,ENSG00000071282,ENSG00000072501,ENSG00000075624…
497	rna	positive	TF	Factor: MAZ; motif: GGGMGGGGSSGGGGGGGGGGGG; match class: 0	TF:M09636_0	0.03936014543706617	5805	531	506	6295	ENSG00000004059,ENSG00000004961,ENSG00000005022,ENSG00000005302,ENSG00000007402,ENSG00000007866,ENSG00000014216,ENSG00000018610,ENSG00000019582,ENSG00000021826,ENSG00000022267,ENSG00000024422,ENSG00000029993,ENSG00000031698,ENSG00000034152,ENSG00000038532,ENSG00000039523,ENSG00000042493,ENSG00000044446,ENSG00000046647,ENSG00000046651,ENSG00000047230,ENSG00000048028,ENSG00000052344,ENSG00000055483…
498	rna	positive	TF	Factor: MAZ; motif: GGGMGGGGSSGGGGGGGGGGGG	TF:M09636	0.03936014543706617	5805	531	506	6295	ENSG00000004059,ENSG00000004961,ENSG00000005022,ENSG00000005302,ENSG00000007402,ENSG00000007866,ENSG00000014216,ENSG00000018610,ENSG00000019582,ENSG00000021826,ENSG00000022267,ENSG00000024422,ENSG00000029993,ENSG00000031698,ENSG00000034152,ENSG00000038532,ENSG00000039523,ENSG00000042493,ENSG00000044446,ENSG00000046647,ENSG00000046651,ENSG00000047230,ENSG00000048028,ENSG00000052344,ENSG00000055483…
499	rna	positive	TF	Factor: E2A; motif: CAGNTGNN; match class: 0	TF:M07353_0	0.039535994859065365	806	531	90	6295	ENSG00000005302,ENSG00000006757,ENSG00000029993,ENSG00000044446,ENSG00000055483,ENSG00000063601,ENSG00000067225,ENSG00000071282,ENSG00000075624,ENSG00000076716,ENSG00000087842,ENSG00000088808,ENSG00000092148,ENSG00000095637,ENSG00000099940,ENSG00000101246,ENSG00000101811,ENSG00000101843,ENSG00000102172,ENSG00000102226,ENSG00000103150,ENSG00000104518,ENSG00000105221,ENSG00000110651,ENSG00000110880…
500	rna	positive	TF	Factor: E2A; motif: CAGNTGNN	TF:M07353	0.039535994859065365	806	531	90	6295	ENSG00000005302,ENSG00000006757,ENSG00000029993,ENSG00000044446,ENSG00000055483,ENSG00000063601,ENSG00000067225,ENSG00000071282,ENSG00000075624,ENSG00000076716,ENSG00000087842,ENSG00000088808,ENSG00000092148,ENSG00000095637,ENSG00000099940,ENSG00000101246,ENSG00000101811,ENSG00000101843,ENSG00000102172,ENSG00000102226,ENSG00000103150,ENSG00000104518,ENSG00000105221,ENSG00000110651,ENSG00000110880…
501	rna	positive	TF	Factor: Egr-2; motif: NTGCGTRGGCGK	TF:M00246	0.040588100942348465	2350	531	229	6295	ENSG00000005302,ENSG00000007866,ENSG00000018610,ENSG00000031698,ENSG00000038532,ENSG00000044446,ENSG00000046651,ENSG00000047230,ENSG00000048028,ENSG00000055483,ENSG00000056277,ENSG00000058668,ENSG00000063241,ENSG00000063601,ENSG00000063660,ENSG00000065833,ENSG00000067113,ENSG00000068323,ENSG00000068366,ENSG00000070718,ENSG00000071127,ENSG00000072062,ENSG00000072506,ENSG00000076716,ENSG00000077150…
502	rna	positive	TF	Factor: Egr-2; motif: NTGCGTRGGCGK; match class: 0	TF:M00246_0	0.040588100942348465	2350	531	229	6295	ENSG00000005302,ENSG00000007866,ENSG00000018610,ENSG00000031698,ENSG00000038532,ENSG00000044446,ENSG00000046651,ENSG00000047230,ENSG00000048028,ENSG00000055483,ENSG00000056277,ENSG00000058668,ENSG00000063241,ENSG00000063601,ENSG00000063660,ENSG00000065833,ENSG00000067113,ENSG00000068323,ENSG00000068366,ENSG00000070718,ENSG00000071127,ENSG00000072062,ENSG00000072506,ENSG00000076716,ENSG00000077150…
503	rna	positive	TF	Factor: SREBP; motif: VNNVTCACCCYA; match class: 0	TF:M00776_0	0.04195001713430738	2019	531	200	6295	ENSG00000003509,ENSG00000004059,ENSG00000005022,ENSG00000007402,ENSG00000019582,ENSG00000022267,ENSG00000024422,ENSG00000034152,ENSG00000039523,ENSG00000052344,ENSG00000055483,ENSG00000056277,ENSG00000058668,ENSG00000063241,ENSG00000063660,ENSG00000065833,ENSG00000068366,ENSG00000068394,ENSG00000068400,ENSG00000069869,ENSG00000070770,ENSG00000076706,ENSG00000076944,ENSG00000077274,ENSG00000077454…
504	rna	positive	TF	Factor: SREBP; motif: VNNVTCACCCYA	TF:M00776	0.04195001713430738	2019	531	200	6295	ENSG00000003509,ENSG00000004059,ENSG00000005022,ENSG00000007402,ENSG00000019582,ENSG00000022267,ENSG00000024422,ENSG00000034152,ENSG00000039523,ENSG00000052344,ENSG00000055483,ENSG00000056277,ENSG00000058668,ENSG00000063241,ENSG00000063660,ENSG00000065833,ENSG00000068366,ENSG00000068394,ENSG00000068400,ENSG00000069869,ENSG00000070770,ENSG00000076706,ENSG00000076944,ENSG00000077274,ENSG00000077454…
505	rna	positive	TF	Factor: Fra-1; motif: RRTGASTCAKN	TF:M07091	0.04260546335571106	509	531	61	6295	ENSG00000042493,ENSG00000068323,ENSG00000076043,ENSG00000077150,ENSG00000087842,ENSG00000096080,ENSG00000105767,ENSG00000108828,ENSG00000117676,ENSG00000117877,ENSG00000119888,ENSG00000120885,ENSG00000123130,ENSG00000124839,ENSG00000125733,ENSG00000125868,ENSG00000125970,ENSG00000126247,ENSG00000128591,ENSG00000130176,ENSG00000130479,ENSG00000131435,ENSG00000133083,ENSG00000135046,ENSG00000135241…
506	rna	positive	TF	Factor: MASH-1; motif: YMMCACCTGCY; match class: 0	TF:M03877_0	0.04260546335571106	293	531	39	6295	ENSG00000007402,ENSG00000055483,ENSG00000076944,ENSG00000077721,ENSG00000086712,ENSG00000088808,ENSG00000096060,ENSG00000100883,ENSG00000105767,ENSG00000106077,ENSG00000109062,ENSG00000114353,ENSG00000121769,ENSG00000123130,ENSG00000123472,ENSG00000126391,ENSG00000126456,ENSG00000127831,ENSG00000128567,ENSG00000130702,ENSG00000136167,ENSG00000137285,ENSG00000140650,ENSG00000147257,ENSG00000156650…
507	rna	positive	TF	Factor: Fra-1; motif: RRTGASTCAKN; match class: 0	TF:M07091_0	0.04260546335571106	509	531	61	6295	ENSG00000042493,ENSG00000068323,ENSG00000076043,ENSG00000077150,ENSG00000087842,ENSG00000096080,ENSG00000105767,ENSG00000108828,ENSG00000117676,ENSG00000117877,ENSG00000119888,ENSG00000120885,ENSG00000123130,ENSG00000124839,ENSG00000125733,ENSG00000125868,ENSG00000125970,ENSG00000126247,ENSG00000128591,ENSG00000130176,ENSG00000130479,ENSG00000131435,ENSG00000133083,ENSG00000135046,ENSG00000135241…
508	rna	positive	TF	Factor: MASH-1; motif: YMMCACCTGCY	TF:M03877	0.04260546335571106	293	531	39	6295	ENSG00000007402,ENSG00000055483,ENSG00000076944,ENSG00000077721,ENSG00000086712,ENSG00000088808,ENSG00000096060,ENSG00000100883,ENSG00000105767,ENSG00000106077,ENSG00000109062,ENSG00000114353,ENSG00000121769,ENSG00000123130,ENSG00000123472,ENSG00000126391,ENSG00000126456,ENSG00000127831,ENSG00000128567,ENSG00000130702,ENSG00000136167,ENSG00000137285,ENSG00000140650,ENSG00000147257,ENSG00000156650…
509	rna	positive	TF	Factor: NF-kappaB; motif: GGGGATYCCC	TF:M00051	0.043732471217346615	2101	531	207	6295	ENSG00000007866,ENSG00000014216,ENSG00000019582,ENSG00000031698,ENSG00000034152,ENSG00000038532,ENSG00000039523,ENSG00000042493,ENSG00000046651,ENSG00000047230,ENSG00000048028,ENSG00000055483,ENSG00000056277,ENSG00000063241,ENSG00000063601,ENSG00000063660,ENSG00000066629,ENSG00000067113,ENSG00000068400,ENSG00000072506,ENSG00000072786,ENSG00000075624,ENSG00000076706,ENSG00000077150,ENSG00000077454…
510	rna	positive	TF	Factor: NF-kappaB; motif: GGGGATYCCC; match class: 0	TF:M00051_0	0.043732471217346615	2101	531	207	6295	ENSG00000007866,ENSG00000014216,ENSG00000019582,ENSG00000031698,ENSG00000034152,ENSG00000038532,ENSG00000039523,ENSG00000042493,ENSG00000046651,ENSG00000047230,ENSG00000048028,ENSG00000055483,ENSG00000056277,ENSG00000063241,ENSG00000063601,ENSG00000063660,ENSG00000066629,ENSG00000067113,ENSG00000068400,ENSG00000072506,ENSG00000072786,ENSG00000075624,ENSG00000076706,ENSG00000077150,ENSG00000077454…
511	rna	positive	TF	Factor: ZEB; motif: NNNCAGGTGNSN; match class: 1	TF:M07371_1	0.04382430678278753	8	531	4	6295	ENSG00000114353,ENSG00000130762,ENSG00000136802,ENSG00000162065
512	rna	positive	TF	Factor: RARA; motif: AGGTCANNYAAAGGTCA; match class: 1	TF:M08019_1	0.044792150849141794	275	531	37	6295	ENSG00000034152,ENSG00000044446,ENSG00000067113,ENSG00000070770,ENSG00000072062,ENSG00000089159,ENSG00000102096,ENSG00000103111,ENSG00000105223,ENSG00000108828,ENSG00000111275,ENSG00000113407,ENSG00000121769,ENSG00000124942,ENSG00000127831,ENSG00000130985,ENSG00000131435,ENSG00000136436,ENSG00000137094,ENSG00000144136,ENSG00000147251,ENSG00000156711,ENSG00000158526,ENSG00000158710,ENSG00000160404…
513	rna	positive	TF	Factor: AP-4; motif: RNCAGCTGC	TF:M00927	0.04500507124818375	1943	531	193	6295	ENSG00000007402,ENSG00000014216,ENSG00000021826,ENSG00000022267,ENSG00000024422,ENSG00000029993,ENSG00000034152,ENSG00000039523,ENSG00000046653,ENSG00000052344,ENSG00000056277,ENSG00000056998,ENSG00000063241,ENSG00000063601,ENSG00000071282,ENSG00000072062,ENSG00000072506,ENSG00000072682,ENSG00000076706,ENSG00000077150,ENSG00000082458,ENSG00000088305,ENSG00000088808,ENSG00000089159,ENSG00000095380…
514	rna	positive	TF	Factor: AP-4; motif: RNCAGCTGC; match class: 0	TF:M00927_0	0.04500507124818375	1943	531	193	6295	ENSG00000007402,ENSG00000014216,ENSG00000021826,ENSG00000022267,ENSG00000024422,ENSG00000029993,ENSG00000034152,ENSG00000039523,ENSG00000046653,ENSG00000052344,ENSG00000056277,ENSG00000056998,ENSG00000063241,ENSG00000063601,ENSG00000071282,ENSG00000072062,ENSG00000072506,ENSG00000072682,ENSG00000076706,ENSG00000077150,ENSG00000082458,ENSG00000088305,ENSG00000088808,ENSG00000089159,ENSG00000095380…
515	rna	positive	TF	Factor: SZF1-1; motif: CCAGGGTAWCAGCNG; match class: 1	TF:M01109_1	0.045284737091140614	139	531	22	6295	ENSG00000003509,ENSG00000076716,ENSG00000077454,ENSG00000101160,ENSG00000101966,ENSG00000105767,ENSG00000106299,ENSG00000109062,ENSG00000115816,ENSG00000123595,ENSG00000124357,ENSG00000130203,ENSG00000131037,ENSG00000132612,ENSG00000133961,ENSG00000152465,ENSG00000160360,ENSG00000180182,ENSG00000182809,ENSG00000185825,ENSG00000187608,ENSG00000188643
516	rna	positive	TF	Factor: Pax-5; motif: RRNGRNGCAN; match class: 1	TF:M03577_1	0.04821520626022048	697	531	79	6295	ENSG00000005022,ENSG00000024422,ENSG00000031698,ENSG00000063601,ENSG00000068323,ENSG00000070718,ENSG00000071859,ENSG00000072062,ENSG00000072501,ENSG00000072682,ENSG00000077721,ENSG00000078808,ENSG00000088808,ENSG00000096060,ENSG00000096717,ENSG00000101901,ENSG00000102024,ENSG00000102103,ENSG00000102119,ENSG00000102225,ENSG00000104093,ENSG00000104833,ENSG00000108821,ENSG00000108830,ENSG00000110880…
517	rna	positive	TF	Factor: SMAD4; motif: GKSRKKCAGMCANCY; match class: 1	TF:M00733_1	0.0486368123226717	760	531	85	6295	ENSG00000004961,ENSG00000006757,ENSG00000007866,ENSG00000021826,ENSG00000046653,ENSG00000067113,ENSG00000068394,ENSG00000070718,ENSG00000072062,ENSG00000072506,ENSG00000072682,ENSG00000076716,ENSG00000077150,ENSG00000099246,ENSG00000100092,ENSG00000102054,ENSG00000102178,ENSG00000102316,ENSG00000104833,ENSG00000106397,ENSG00000106605,ENSG00000109062,ENSG00000111679,ENSG00000115685,ENSG00000116954…
518	rna	positive	TF	Factor: RARA; motif: AGGTCANNYAAAGGTCA	TF:M08019	0.04926267571194419	1553	531	158	6295	ENSG00000003509,ENSG00000004059,ENSG00000004961,ENSG00000005022,ENSG00000034152,ENSG00000039523,ENSG00000044446,ENSG00000067113,ENSG00000068366,ENSG00000070770,ENSG00000072062,ENSG00000072501,ENSG00000075624,ENSG00000077454,ENSG00000077721,ENSG00000082458,ENSG00000083444,ENSG00000088305,ENSG00000088808,ENSG00000089159,ENSG00000095637,ENSG00000096717,ENSG00000100092,ENSG00000100417,ENSG00000101160…
519	rna	positive	TF	Factor: RARA; motif: AGGTCANNYAAAGGTCA; match class: 0	TF:M08019_0	0.04926267571194419	1553	531	158	6295	ENSG00000003509,ENSG00000004059,ENSG00000004961,ENSG00000005022,ENSG00000034152,ENSG00000039523,ENSG00000044446,ENSG00000067113,ENSG00000068366,ENSG00000070770,ENSG00000072062,ENSG00000072501,ENSG00000075624,ENSG00000077454,ENSG00000077721,ENSG00000082458,ENSG00000083444,ENSG00000088305,ENSG00000088808,ENSG00000089159,ENSG00000095637,ENSG00000096717,ENSG00000100092,ENSG00000100417,ENSG00000101160…
0	protein	negative	GO:BP	carboxylic acid catabolic process	GO:0046395	0.004175390377906635	142	300	22	5979	ENSG00000060982,ENSG00000100116,ENSG00000103316,ENSG00000104325,ENSG00000104823,ENSG00000107537,ENSG00000127884,ENSG00000128928,ENSG00000132541,ENSG00000133835,ENSG00000138029,ENSG00000140263,ENSG00000140284,ENSG00000145882,ENSG00000148672,ENSG00000156521,ENSG00000167114,ENSG00000178445,ENSG00000183032,ENSG00000183044,ENSG00000198130,ENSG00000198721
1	protein	negative	GO:BP	organic acid catabolic process	GO:0016054	0.004175390377906635	142	300	22	5979	ENSG00000060982,ENSG00000100116,ENSG00000103316,ENSG00000104325,ENSG00000104823,ENSG00000107537,ENSG00000127884,ENSG00000128928,ENSG00000132541,ENSG00000133835,ENSG00000138029,ENSG00000140263,ENSG00000140284,ENSG00000145882,ENSG00000148672,ENSG00000156521,ENSG00000167114,ENSG00000178445,ENSG00000183032,ENSG00000183044,ENSG00000198130,ENSG00000198721
2	protein	negative	GO:BP	small molecule catabolic process	GO:0044282	0.006076504435487109	213	300	27	5979	ENSG00000060982,ENSG00000073060,ENSG00000083720,ENSG00000087053,ENSG00000100116,ENSG00000103316,ENSG00000104325,ENSG00000104823,ENSG00000107537,ENSG00000122643,ENSG00000127884,ENSG00000128928,ENSG00000132541,ENSG00000133835,ENSG00000138029,ENSG00000140263,ENSG00000140284,ENSG00000145882,ENSG00000148672,ENSG00000156521,ENSG00000161267,ENSG00000167114,ENSG00000178445,ENSG00000183032,ENSG00000183044…
3	protein	negative	GO:BP	retina morphogenesis in camera-type eye	GO:0060042	0.006076504435487109	7	300	5	5979	ENSG00000007062,ENSG00000104327,ENSG00000112893,ENSG00000154096,ENSG00000178764
4	protein	negative	GO:BP	zinc ion import across plasma membrane	GO:0071578	0.006076504435487109	4	300	4	5979	ENSG00000104635,ENSG00000141424,ENSG00000170385,ENSG00000196950
5	protein	negative	GO:BP	sensory organ morphogenesis	GO:0090596	0.011912790746967104	65	300	13	5979	ENSG00000007062,ENSG00000100625,ENSG00000104327,ENSG00000112655,ENSG00000112893,ENSG00000116688,ENSG00000140463,ENSG00000154096,ENSG00000171316,ENSG00000178764,ENSG00000180900,ENSG00000204262,ENSG00000218336
6	protein	negative	GO:BP	monocarboxylic acid catabolic process	GO:0072329	0.012151268300503044	66	300	13	5979	ENSG00000104325,ENSG00000104823,ENSG00000107537,ENSG00000127884,ENSG00000128928,ENSG00000133835,ENSG00000138029,ENSG00000140263,ENSG00000140284,ENSG00000156521,ENSG00000167114,ENSG00000183044,ENSG00000198721
7	protein	negative	GO:BP	mitochondrial respiratory chain complex assembly	GO:0033108	0.04093427983634256	66	300	12	5979	ENSG00000110717,ENSG00000119013,ENSG00000136521,ENSG00000137288,ENSG00000140990,ENSG00000151413,ENSG00000158864,ENSG00000164258,ENSG00000170906,ENSG00000183648,ENSG00000183978,ENSG00000184983
8	protein	negative	GO:BP	fatty acid catabolic process	GO:0009062	0.04093427983634256	56	300	11	5979	ENSG00000104325,ENSG00000104823,ENSG00000107537,ENSG00000127884,ENSG00000128928,ENSG00000133835,ENSG00000138029,ENSG00000140284,ENSG00000156521,ENSG00000167114,ENSG00000198721
9	protein	negative	GO:BP	zinc ion transmembrane transport	GO:0071577	0.04093427983634256	6	300	4	5979	ENSG00000104635,ENSG00000141424,ENSG00000170385,ENSG00000196950
10	protein	negative	GO:BP	eye morphogenesis	GO:0048592	0.04804148317618296	40	300	9	5979	ENSG00000007062,ENSG00000104327,ENSG00000112893,ENSG00000116688,ENSG00000140463,ENSG00000154096,ENSG00000178764,ENSG00000204262,ENSG00000218336
11	protein	negative	GO:BP	mitochondrial electron transport, NADH to ubiquinone	GO:0006120	0.04804148317618296	40	300	9	5979	ENSG00000110717,ENSG00000119013,ENSG00000136521,ENSG00000140990,ENSG00000158864,ENSG00000164258,ENSG00000170906,ENSG00000183648,ENSG00000184983
12	protein	negative	GO:BP	mitochondrial respiratory chain complex I assembly	GO:0032981	0.04984601667209804	50	300	10	5979	ENSG00000110717,ENSG00000119013,ENSG00000136521,ENSG00000140990,ENSG00000151413,ENSG00000158864,ENSG00000164258,ENSG00000170906,ENSG00000183648,ENSG00000184983
13	protein	negative	GO:BP	NADH dehydrogenase complex assembly	GO:0010257	0.04984601667209804	50	300	10	5979	ENSG00000110717,ENSG00000119013,ENSG00000136521,ENSG00000140990,ENSG00000151413,ENSG00000158864,ENSG00000164258,ENSG00000170906,ENSG00000183648,ENSG00000184983
0	protein	positive	GO:BP	anatomical structure morphogenesis	GO:0009653	0.001013892938241002	933	312	83	5979	ENSG00000004961,ENSG00000014216,ENSG00000022267,ENSG00000024422,ENSG00000031698,ENSG00000035403,ENSG00000067225,ENSG00000069869,ENSG00000071127,ENSG00000073712,ENSG00000075624,ENSG00000076706,ENSG00000076716,ENSG00000077150,ENSG00000082458,ENSG00000089159,ENSG00000092820,ENSG00000096717,ENSG00000100815,ENSG00000101843,ENSG00000103811,ENSG00000106078,ENSG00000106299,ENSG00000107554,ENSG00000108821…
1	protein	positive	GO:BP	anatomical structure development	GO:0048856	0.0017633197081076046	1985	312	144	5979	ENSG00000004961,ENSG00000008294,ENSG00000014216,ENSG00000022267,ENSG00000024422,ENSG00000029993,ENSG00000031698,ENSG00000035403,ENSG00000052126,ENSG00000066629,ENSG00000067225,ENSG00000068323,ENSG00000068366,ENSG00000069869,ENSG00000070770,ENSG00000071127,ENSG00000071564,ENSG00000073712,ENSG00000075624,ENSG00000076706,ENSG00000076716,ENSG00000077150,ENSG00000077721,ENSG00000082458,ENSG00000086712…
2	protein	positive	GO:BP	supramolecular fiber organization	GO:0097435	0.002298521937275666	323	312	38	5979	ENSG00000042493,ENSG00000071127,ENSG00000089159,ENSG00000090924,ENSG00000092820,ENSG00000095637,ENSG00000101871,ENSG00000102024,ENSG00000106078,ENSG00000106299,ENSG00000108821,ENSG00000108830,ENSG00000120860,ENSG00000120885,ENSG00000125868,ENSG00000125968,ENSG00000127831,ENSG00000129680,ENSG00000130479,ENSG00000133789,ENSG00000136167,ENSG00000141646,ENSG00000146950,ENSG00000147010,ENSG00000147202…
3	protein	positive	GO:BP	developmental process	GO:0032502	0.00533499594420745	2150	312	150	5979	ENSG00000004961,ENSG00000008294,ENSG00000014216,ENSG00000022267,ENSG00000024422,ENSG00000029993,ENSG00000031698,ENSG00000035403,ENSG00000052126,ENSG00000066629,ENSG00000067225,ENSG00000068323,ENSG00000068366,ENSG00000069869,ENSG00000070770,ENSG00000071127,ENSG00000071564,ENSG00000072501,ENSG00000073712,ENSG00000075624,ENSG00000076706,ENSG00000076716,ENSG00000077150,ENSG00000077721,ENSG00000082458…
4	protein	positive	GO:BP	actin filament organization	GO:0007015	0.009197090721390615	197	312	26	5979	ENSG00000042493,ENSG00000071127,ENSG00000089159,ENSG00000090924,ENSG00000092820,ENSG00000095637,ENSG00000102024,ENSG00000106078,ENSG00000106299,ENSG00000108830,ENSG00000120860,ENSG00000125868,ENSG00000125968,ENSG00000127831,ENSG00000133789,ENSG00000136167,ENSG00000146950,ENSG00000147010,ENSG00000147202,ENSG00000159251,ENSG00000159753,ENSG00000177885,ENSG00000179604,ENSG00000196924,ENSG00000197747…
5	protein	positive	GO:BP	system development	GO:0048731	0.009324679653948894	1613	312	118	5979	ENSG00000004961,ENSG00000008294,ENSG00000014216,ENSG00000022267,ENSG00000029993,ENSG00000031698,ENSG00000035403,ENSG00000052126,ENSG00000066629,ENSG00000067225,ENSG00000068323,ENSG00000068366,ENSG00000069869,ENSG00000070770,ENSG00000071127,ENSG00000071564,ENSG00000075624,ENSG00000076706,ENSG00000076716,ENSG00000077150,ENSG00000086712,ENSG00000087842,ENSG00000092148,ENSG00000092820,ENSG00000096717…
6	protein	positive	GO:BP	cell motility	GO:0048870	0.015241133309206253	523	312	49	5979	ENSG00000008294,ENSG00000035403,ENSG00000039523,ENSG00000071127,ENSG00000075624,ENSG00000076706,ENSG00000076716,ENSG00000089159,ENSG00000096717,ENSG00000102572,ENSG00000103811,ENSG00000105810,ENSG00000106299,ENSG00000108821,ENSG00000108830,ENSG00000109062,ENSG00000111679,ENSG00000116106,ENSG00000123159,ENSG00000123908,ENSG00000124486,ENSG00000125968,ENSG00000127831,ENSG00000127837,ENSG00000130150…
7	protein	positive	GO:BP	locomotion	GO:0040011	0.015241133309206253	597	312	54	5979	ENSG00000008294,ENSG00000035403,ENSG00000039523,ENSG00000069869,ENSG00000071127,ENSG00000075624,ENSG00000076706,ENSG00000076716,ENSG00000089159,ENSG00000092820,ENSG00000096717,ENSG00000101421,ENSG00000102572,ENSG00000103811,ENSG00000105810,ENSG00000106299,ENSG00000108821,ENSG00000108830,ENSG00000109062,ENSG00000111679,ENSG00000116106,ENSG00000123159,ENSG00000123908,ENSG00000124486,ENSG00000125968…
8	protein	positive	GO:BP	localization of cell	GO:0051674	0.015241133309206253	523	312	49	5979	ENSG00000008294,ENSG00000035403,ENSG00000039523,ENSG00000071127,ENSG00000075624,ENSG00000076706,ENSG00000076716,ENSG00000089159,ENSG00000096717,ENSG00000102572,ENSG00000103811,ENSG00000105810,ENSG00000106299,ENSG00000108821,ENSG00000108830,ENSG00000109062,ENSG00000111679,ENSG00000116106,ENSG00000123159,ENSG00000123908,ENSG00000124486,ENSG00000125968,ENSG00000127831,ENSG00000127837,ENSG00000130150…
9	protein	positive	GO:BP	regulation of developmental process	GO:0050793	0.015241133309206253	924	312	75	5979	ENSG00000008294,ENSG00000024422,ENSG00000029993,ENSG00000031698,ENSG00000067225,ENSG00000068323,ENSG00000069869,ENSG00000071127,ENSG00000071564,ENSG00000073712,ENSG00000076716,ENSG00000086712,ENSG00000092820,ENSG00000096717,ENSG00000100097,ENSG00000101843,ENSG00000101974,ENSG00000102572,ENSG00000103811,ENSG00000105810,ENSG00000106078,ENSG00000107130,ENSG00000107554,ENSG00000108821,ENSG00000108828…
10	protein	positive	GO:BP	cell activation	GO:0001775	0.0188167294383928	506	312	47	5979	ENSG00000014216,ENSG00000029993,ENSG00000035403,ENSG00000067225,ENSG00000071564,ENSG00000075624,ENSG00000077150,ENSG00000099940,ENSG00000100097,ENSG00000100994,ENSG00000101974,ENSG00000103811,ENSG00000105810,ENSG00000108821,ENSG00000108828,ENSG00000111679,ENSG00000114520,ENSG00000115073,ENSG00000117592,ENSG00000117676,ENSG00000120885,ENSG00000123131,ENSG00000127481,ENSG00000130150,ENSG00000131203…
11	protein	positive	GO:BP	cytoskeleton organization	GO:0007010	0.0188167294383928	672	312	58	5979	ENSG00000024422,ENSG00000042493,ENSG00000066629,ENSG00000071127,ENSG00000072501,ENSG00000075624,ENSG00000077274,ENSG00000089159,ENSG00000090924,ENSG00000092820,ENSG00000095637,ENSG00000101421,ENSG00000101871,ENSG00000101972,ENSG00000102024,ENSG00000106078,ENSG00000106299,ENSG00000108830,ENSG00000109062,ENSG00000115073,ENSG00000118898,ENSG00000120860,ENSG00000125868,ENSG00000125968,ENSG00000127831…
12	protein	positive	GO:BP	multicellular organism development	GO:0007275	0.0188167294383928	1804	312	126	5979	ENSG00000004961,ENSG00000008294,ENSG00000014216,ENSG00000022267,ENSG00000029993,ENSG00000031698,ENSG00000035403,ENSG00000052126,ENSG00000066629,ENSG00000067225,ENSG00000068323,ENSG00000068366,ENSG00000069869,ENSG00000070770,ENSG00000071127,ENSG00000071564,ENSG00000075624,ENSG00000076706,ENSG00000076716,ENSG00000077150,ENSG00000077721,ENSG00000086712,ENSG00000087842,ENSG00000092148,ENSG00000092820…
13	protein	positive	GO:BP	cell morphogenesis	GO:0000902	0.0188167294383928	420	312	41	5979	ENSG00000035403,ENSG00000069869,ENSG00000071127,ENSG00000073712,ENSG00000075624,ENSG00000089159,ENSG00000092820,ENSG00000106078,ENSG00000106299,ENSG00000107554,ENSG00000108830,ENSG00000109062,ENSG00000111679,ENSG00000116106,ENSG00000120885,ENSG00000124486,ENSG00000125968,ENSG00000127831,ENSG00000130479,ENSG00000130702,ENSG00000132688,ENSG00000133083,ENSG00000137055,ENSG00000137693,ENSG00000140575…
14	protein	positive	GO:BP	regulation of protein depolymerization	GO:1901879	0.0188167294383928	52	312	11	5979	ENSG00000042493,ENSG00000071127,ENSG00000101871,ENSG00000125868,ENSG00000127831,ENSG00000130479,ENSG00000132688,ENSG00000133789,ENSG00000159753,ENSG00000165175,ENSG00000247596
15	protein	positive	GO:BP	movement of cell or subcellular component	GO:0006928	0.01884075555329511	705	312	60	5979	ENSG00000008294,ENSG00000035403,ENSG00000039523,ENSG00000070718,ENSG00000071127,ENSG00000075624,ENSG00000076706,ENSG00000076716,ENSG00000089159,ENSG00000092820,ENSG00000096717,ENSG00000100815,ENSG00000102572,ENSG00000103811,ENSG00000105810,ENSG00000106299,ENSG00000108821,ENSG00000108830,ENSG00000109062,ENSG00000111679,ENSG00000115073,ENSG00000116106,ENSG00000123159,ENSG00000123908,ENSG00000124486…
16	protein	positive	GO:BP	cell migration	GO:0016477	0.020173503758815037	482	312	45	5979	ENSG00000008294,ENSG00000035403,ENSG00000039523,ENSG00000071127,ENSG00000076706,ENSG00000076716,ENSG00000089159,ENSG00000096717,ENSG00000102572,ENSG00000103811,ENSG00000106299,ENSG00000108821,ENSG00000108830,ENSG00000109062,ENSG00000111679,ENSG00000116106,ENSG00000123159,ENSG00000123908,ENSG00000124486,ENSG00000125968,ENSG00000127831,ENSG00000127837,ENSG00000130150,ENSG00000130669,ENSG00000130702…
17	protein	positive	GO:BP	immune response	GO:0006955	0.020231786854771616	680	312	58	5979	ENSG00000013503,ENSG00000014216,ENSG00000029993,ENSG00000035403,ENSG00000067225,ENSG00000068323,ENSG00000075624,ENSG00000077150,ENSG00000092820,ENSG00000096717,ENSG00000099940,ENSG00000100097,ENSG00000100994,ENSG00000101347,ENSG00000101843,ENSG00000101871,ENSG00000101966,ENSG00000103811,ENSG00000106299,ENSG00000108821,ENSG00000108828,ENSG00000111679,ENSG00000114520,ENSG00000115073,ENSG00000115211…
18	protein	positive	GO:BP	kidney epithelium development	GO:0072073	0.020231786854771616	37	312	9	5979	ENSG00000113658,ENSG00000116106,ENSG00000130702,ENSG00000137693,ENSG00000140575,ENSG00000141646,ENSG00000147257,ENSG00000157483,ENSG00000179222
19	protein	positive	GO:BP	tissue development	GO:0009888	0.020231786854771616	651	312	56	5979	ENSG00000014216,ENSG00000035403,ENSG00000067225,ENSG00000071127,ENSG00000076716,ENSG00000082458,ENSG00000086712,ENSG00000092820,ENSG00000096717,ENSG00000100815,ENSG00000101843,ENSG00000102119,ENSG00000103811,ENSG00000105810,ENSG00000106078,ENSG00000108821,ENSG00000109062,ENSG00000113658,ENSG00000115641,ENSG00000116106,ENSG00000116478,ENSG00000118898,ENSG00000125968,ENSG00000126247,ENSG00000127831…
20	protein	positive	GO:BP	cellular developmental process	GO:0048869	0.020231786854771616	1451	312	105	5979	ENSG00000008294,ENSG00000014216,ENSG00000022267,ENSG00000024422,ENSG00000029993,ENSG00000035403,ENSG00000066629,ENSG00000068323,ENSG00000068366,ENSG00000069869,ENSG00000071127,ENSG00000071564,ENSG00000073712,ENSG00000075624,ENSG00000077150,ENSG00000087842,ENSG00000089022,ENSG00000089159,ENSG00000092820,ENSG00000096717,ENSG00000100097,ENSG00000100815,ENSG00000101843,ENSG00000101974,ENSG00000102038…
21	protein	positive	GO:BP	cellular component morphogenesis	GO:0032989	0.021375862845545643	460	312	43	5979	ENSG00000035403,ENSG00000069869,ENSG00000071127,ENSG00000073712,ENSG00000075624,ENSG00000089159,ENSG00000092820,ENSG00000106078,ENSG00000106299,ENSG00000107554,ENSG00000108830,ENSG00000109062,ENSG00000111679,ENSG00000116106,ENSG00000120885,ENSG00000124486,ENSG00000125968,ENSG00000127831,ENSG00000130479,ENSG00000130702,ENSG00000132688,ENSG00000133083,ENSG00000137055,ENSG00000137693,ENSG00000140575…
22	protein	positive	GO:BP	cell differentiation	GO:0030154	0.021375862845545643	1356	312	99	5979	ENSG00000008294,ENSG00000014216,ENSG00000022267,ENSG00000024422,ENSG00000029993,ENSG00000035403,ENSG00000066629,ENSG00000068323,ENSG00000068366,ENSG00000069869,ENSG00000071127,ENSG00000071564,ENSG00000073712,ENSG00000075624,ENSG00000077150,ENSG00000087842,ENSG00000089159,ENSG00000092820,ENSG00000096717,ENSG00000100097,ENSG00000100815,ENSG00000101843,ENSG00000101974,ENSG00000102038,ENSG00000102119…
23	protein	positive	GO:BP	response to external stimulus	GO:0009605	0.02185638691102581	861	312	69	5979	ENSG00000013503,ENSG00000025800,ENSG00000029993,ENSG00000039523,ENSG00000067225,ENSG00000068366,ENSG00000077150,ENSG00000092820,ENSG00000096060,ENSG00000096717,ENSG00000101347,ENSG00000101843,ENSG00000101871,ENSG00000101966,ENSG00000102096,ENSG00000102572,ENSG00000105810,ENSG00000106299,ENSG00000108821,ENSG00000111679,ENSG00000114520,ENSG00000116106,ENSG00000118898,ENSG00000120885,ENSG00000127831…
24	protein	positive	GO:BP	immune system process	GO:0002376	0.022617413770478326	1042	312	80	5979	ENSG00000013503,ENSG00000014216,ENSG00000029993,ENSG00000035403,ENSG00000066629,ENSG00000067225,ENSG00000068323,ENSG00000071127,ENSG00000071564,ENSG00000075624,ENSG00000077150,ENSG00000087842,ENSG00000092820,ENSG00000096717,ENSG00000099940,ENSG00000100097,ENSG00000100994,ENSG00000101347,ENSG00000101843,ENSG00000101871,ENSG00000101966,ENSG00000101974,ENSG00000103811,ENSG00000105810,ENSG00000106299…
25	protein	positive	GO:BP	cytidine catabolic process	GO:0006216	0.022950733039324468	3	312	3	5979	ENSG00000158825,ENSG00000179750,ENSG00000244509
26	protein	positive	GO:BP	cytidine metabolic process	GO:0046087	0.022950733039324468	3	312	3	5979	ENSG00000158825,ENSG00000179750,ENSG00000244509
27	protein	positive	GO:BP	actin cytoskeleton organization	GO:0030036	0.022950733039324468	336	312	34	5979	ENSG00000024422,ENSG00000042493,ENSG00000071127,ENSG00000075624,ENSG00000089159,ENSG00000090924,ENSG00000092820,ENSG00000095637,ENSG00000102024,ENSG00000106078,ENSG00000106299,ENSG00000108830,ENSG00000109062,ENSG00000120860,ENSG00000125868,ENSG00000125968,ENSG00000127831,ENSG00000130176,ENSG00000133789,ENSG00000136167,ENSG00000141646,ENSG00000146950,ENSG00000147010,ENSG00000147202,ENSG00000159251…
28	protein	positive	GO:BP	protein depolymerization	GO:0051261	0.022950733039324468	66	312	12	5979	ENSG00000042493,ENSG00000071127,ENSG00000101871,ENSG00000125868,ENSG00000127831,ENSG00000130479,ENSG00000132688,ENSG00000133789,ENSG00000159753,ENSG00000165175,ENSG00000175216,ENSG00000247596
29	protein	positive	GO:BP	cytidine deamination	GO:0009972	0.022950733039324468	3	312	3	5979	ENSG00000158825,ENSG00000179750,ENSG00000244509
30	protein	positive	GO:BP	actin filament-based process	GO:0030029	0.027726333458587774	370	312	36	5979	ENSG00000024422,ENSG00000042493,ENSG00000071127,ENSG00000075624,ENSG00000089159,ENSG00000090924,ENSG00000092820,ENSG00000095637,ENSG00000102024,ENSG00000106078,ENSG00000106299,ENSG00000108830,ENSG00000109062,ENSG00000120860,ENSG00000125868,ENSG00000125968,ENSG00000127831,ENSG00000130176,ENSG00000133789,ENSG00000136167,ENSG00000141646,ENSG00000146950,ENSG00000147010,ENSG00000147202,ENSG00000152661…
31	protein	positive	GO:BP	positive regulation of developmental process	GO:0051094	0.03152906974687831	460	312	42	5979	ENSG00000008294,ENSG00000024422,ENSG00000067225,ENSG00000071564,ENSG00000092820,ENSG00000096717,ENSG00000101974,ENSG00000103811,ENSG00000106078,ENSG00000108821,ENSG00000108830,ENSG00000113658,ENSG00000116106,ENSG00000116478,ENSG00000117676,ENSG00000123562,ENSG00000123908,ENSG00000127831,ENSG00000130669,ENSG00000131203,ENSG00000137055,ENSG00000137693,ENSG00000138772,ENSG00000140575,ENSG00000141646…
32	protein	positive	GO:BP	cell communication	GO:0007154	0.03451559791795926	2023	312	135	5979	ENSG00000005448,ENSG00000008294,ENSG00000014216,ENSG00000039523,ENSG00000067992,ENSG00000068366,ENSG00000069869,ENSG00000070770,ENSG00000073712,ENSG00000075624,ENSG00000076716,ENSG00000077150,ENSG00000082458,ENSG00000089022,ENSG00000089159,ENSG00000089234,ENSG00000090924,ENSG00000092820,ENSG00000095637,ENSG00000096717,ENSG00000099940,ENSG00000100097,ENSG00000101347,ENSG00000101843,ENSG00000101871…
33	protein	positive	GO:BP	signal transduction	GO:0007165	0.03564354056838035	1863	312	126	5979	ENSG00000005448,ENSG00000008294,ENSG00000014216,ENSG00000039523,ENSG00000067992,ENSG00000069869,ENSG00000070770,ENSG00000073712,ENSG00000075624,ENSG00000076716,ENSG00000077150,ENSG00000082458,ENSG00000089022,ENSG00000089159,ENSG00000089234,ENSG00000090924,ENSG00000092820,ENSG00000095637,ENSG00000096717,ENSG00000100097,ENSG00000101347,ENSG00000101843,ENSG00000101871,ENSG00000101966,ENSG00000102054…
34	protein	positive	GO:BP	regulation of cell motility	GO:2000145	0.04198397666185315	326	312	32	5979	ENSG00000008294,ENSG00000035403,ENSG00000039523,ENSG00000076706,ENSG00000096717,ENSG00000102572,ENSG00000103811,ENSG00000105810,ENSG00000106299,ENSG00000108821,ENSG00000108830,ENSG00000109062,ENSG00000123908,ENSG00000127831,ENSG00000127837,ENSG00000130150,ENSG00000130702,ENSG00000130830,ENSG00000133789,ENSG00000137055,ENSG00000138772,ENSG00000140575,ENSG00000147065,ENSG00000152661,ENSG00000159753…
35	protein	positive	GO:BP	regulation of anatomical structure morphogenesis	GO:0022603	0.04198397666185315	396	312	37	5979	ENSG00000024422,ENSG00000031698,ENSG00000067225,ENSG00000069869,ENSG00000071127,ENSG00000073712,ENSG00000076716,ENSG00000092820,ENSG00000096717,ENSG00000101843,ENSG00000103811,ENSG00000107554,ENSG00000108828,ENSG00000108830,ENSG00000109062,ENSG00000116106,ENSG00000123908,ENSG00000125968,ENSG00000127831,ENSG00000130669,ENSG00000137055,ENSG00000138772,ENSG00000141646,ENSG00000143320,ENSG00000147010…
36	protein	positive	GO:BP	leukocyte activation	GO:0045321	0.04198397666185315	455	312	41	5979	ENSG00000014216,ENSG00000029993,ENSG00000035403,ENSG00000067225,ENSG00000071564,ENSG00000099940,ENSG00000100097,ENSG00000100994,ENSG00000101974,ENSG00000103811,ENSG00000105810,ENSG00000108828,ENSG00000111679,ENSG00000114520,ENSG00000115073,ENSG00000117592,ENSG00000120885,ENSG00000123131,ENSG00000127481,ENSG00000130150,ENSG00000131203,ENSG00000133789,ENSG00000134996,ENSG00000136167,ENSG00000138772…
37	protein	positive	GO:BP	regulation of cellular process	GO:0050794	0.04198397666185315	3668	312	220	5979	ENSG00000005448,ENSG00000008294,ENSG00000014216,ENSG00000022267,ENSG00000024422,ENSG00000025800,ENSG00000029993,ENSG00000031698,ENSG00000035403,ENSG00000039523,ENSG00000042493,ENSG00000058729,ENSG00000063601,ENSG00000067992,ENSG00000068323,ENSG00000068366,ENSG00000069869,ENSG00000070770,ENSG00000071127,ENSG00000071564,ENSG00000072501,ENSG00000073712,ENSG00000075624,ENSG00000076706,ENSG00000076716…
38	protein	positive	GO:BP	response to stimulus	GO:0050896	0.04198397666185315	2999	312	186	5979	ENSG00000005448,ENSG00000008294,ENSG00000013503,ENSG00000014216,ENSG00000024422,ENSG00000025800,ENSG00000029993,ENSG00000035403,ENSG00000039523,ENSG00000065833,ENSG00000067225,ENSG00000067992,ENSG00000068323,ENSG00000068366,ENSG00000069869,ENSG00000070770,ENSG00000072501,ENSG00000073712,ENSG00000075624,ENSG00000076706,ENSG00000076716,ENSG00000077150,ENSG00000077721,ENSG00000082458,ENSG00000086102…
39	protein	positive	GO:BP	nephron epithelium development	GO:0072009	0.04198397666185315	27	312	7	5979	ENSG00000130702,ENSG00000137693,ENSG00000140575,ENSG00000141646,ENSG00000147257,ENSG00000157483,ENSG00000179222
40	protein	positive	GO:BP	immune effector process	GO:0002252	0.04198397666185315	472	312	42	5979	ENSG00000013503,ENSG00000014216,ENSG00000035403,ENSG00000067225,ENSG00000071127,ENSG00000075624,ENSG00000099940,ENSG00000100097,ENSG00000100994,ENSG00000101347,ENSG00000103811,ENSG00000106299,ENSG00000108828,ENSG00000111679,ENSG00000114520,ENSG00000115073,ENSG00000117592,ENSG00000120885,ENSG00000123131,ENSG00000127481,ENSG00000130150,ENSG00000133789,ENSG00000134996,ENSG00000136167,ENSG00000138032…
41	protein	positive	GO:BP	epithelium development	GO:0060429	0.04198397666185315	412	312	38	5979	ENSG00000014216,ENSG00000035403,ENSG00000071127,ENSG00000076716,ENSG00000082458,ENSG00000092820,ENSG00000101843,ENSG00000103811,ENSG00000105810,ENSG00000106078,ENSG00000109062,ENSG00000113658,ENSG00000116106,ENSG00000116478,ENSG00000118898,ENSG00000125968,ENSG00000126247,ENSG00000127831,ENSG00000130702,ENSG00000135047,ENSG00000136943,ENSG00000137693,ENSG00000140575,ENSG00000141646,ENSG00000147050…
42	protein	positive	GO:BP	regulation of response to stimulus	GO:0048583	0.044462258357286566	1474	312	103	5979	ENSG00000005448,ENSG00000008294,ENSG00000013503,ENSG00000014216,ENSG00000025800,ENSG00000029993,ENSG00000069869,ENSG00000070770,ENSG00000075624,ENSG00000076716,ENSG00000082458,ENSG00000089022,ENSG00000089159,ENSG00000089234,ENSG00000090924,ENSG00000092820,ENSG00000095637,ENSG00000096717,ENSG00000100097,ENSG00000101347,ENSG00000101843,ENSG00000101871,ENSG00000101966,ENSG00000102054,ENSG00000102096…
43	protein	positive	GO:BP	extracellular matrix disassembly	GO:0022617	0.044462258357286566	20	312	6	5979	ENSG00000014216,ENSG00000126247,ENSG00000135047,ENSG00000136167,ENSG00000136943,ENSG00000159753
44	protein	positive	GO:BP	animal organ development	GO:0048513	0.04482238285232047	1150	312	84	5979	ENSG00000004961,ENSG00000014216,ENSG00000022267,ENSG00000029993,ENSG00000066629,ENSG00000067225,ENSG00000068323,ENSG00000070770,ENSG00000071127,ENSG00000071564,ENSG00000075624,ENSG00000076716,ENSG00000077150,ENSG00000086712,ENSG00000087842,ENSG00000092148,ENSG00000096717,ENSG00000100097,ENSG00000100815,ENSG00000101843,ENSG00000101974,ENSG00000102024,ENSG00000102038,ENSG00000102119,ENSG00000102230…
45	protein	positive	GO:BP	actin filament network formation	GO:0051639	0.04482238285232047	8	312	4	5979	ENSG00000102024,ENSG00000106078,ENSG00000136167,ENSG00000159753
46	protein	positive	GO:BP	ribonucleoside catabolic process	GO:0042454	0.04482238285232047	8	312	4	5979	ENSG00000158825,ENSG00000165704,ENSG00000179750,ENSG00000244509
47	protein	positive	GO:BP	regulation of cell shape	GO:0008360	0.04512340784325463	75	312	12	5979	ENSG00000071127,ENSG00000073712,ENSG00000092820,ENSG00000107554,ENSG00000108830,ENSG00000109062,ENSG00000127831,ENSG00000147010,ENSG00000147065,ENSG00000162458,ENSG00000167657,ENSG00000179604
48	protein	positive	GO:BP	multicellular organismal process	GO:0032501	0.04668406703764095	2294	312	148	5979	ENSG00000004961,ENSG00000008294,ENSG00000013503,ENSG00000014216,ENSG00000022267,ENSG00000024422,ENSG00000025800,ENSG00000029993,ENSG00000031698,ENSG00000035403,ENSG00000052126,ENSG00000066629,ENSG00000067225,ENSG00000068323,ENSG00000068366,ENSG00000069869,ENSG00000070770,ENSG00000071127,ENSG00000071564,ENSG00000072501,ENSG00000075624,ENSG00000076706,ENSG00000076716,ENSG00000077150,ENSG00000077721…
49	protein	positive	GO:BP	cell development	GO:0048468	0.04668406703764095	761	312	60	5979	ENSG00000008294,ENSG00000035403,ENSG00000068366,ENSG00000069869,ENSG00000071127,ENSG00000071564,ENSG00000073712,ENSG00000075624,ENSG00000089159,ENSG00000092820,ENSG00000100097,ENSG00000100815,ENSG00000102225,ENSG00000102572,ENSG00000105810,ENSG00000106078,ENSG00000106299,ENSG00000107130,ENSG00000108830,ENSG00000109062,ENSG00000111679,ENSG00000113658,ENSG00000115211,ENSG00000115641,ENSG00000116106…
50	protein	positive	GO:BP	pyrimidine ribonucleoside catabolic process	GO:0046133	0.04668406703764095	4	312	3	5979	ENSG00000158825,ENSG00000179750,ENSG00000244509
51	protein	positive	GO:BP	pyrimidine ribonucleoside metabolic process	GO:0046131	0.04668406703764095	4	312	3	5979	ENSG00000158825,ENSG00000179750,ENSG00000244509
52	protein	positive	GO:BP	positive regulation of protein depolymerization	GO:1901881	0.04668406703764095	14	312	5	5979	ENSG00000071127,ENSG00000125868,ENSG00000127831,ENSG00000132688,ENSG00000159753
53	protein	positive	GO:BP	signaling	GO:0023052	0.04668406703764095	2004	312	132	5979	ENSG00000005448,ENSG00000008294,ENSG00000014216,ENSG00000039523,ENSG00000067992,ENSG00000068366,ENSG00000069869,ENSG00000070770,ENSG00000073712,ENSG00000075624,ENSG00000076716,ENSG00000077150,ENSG00000082458,ENSG00000089022,ENSG00000089159,ENSG00000089234,ENSG00000090924,ENSG00000092820,ENSG00000095637,ENSG00000096717,ENSG00000099940,ENSG00000100097,ENSG00000101347,ENSG00000101843,ENSG00000101871…
54	protein	positive	GO:BP	regulation of cell projection size	GO:0032536	0.04668406703764095	4	312	3	5979	ENSG00000092820,ENSG00000127831,ENSG00000247596
55	protein	positive	GO:BP	DNA replication, synthesis of RNA primer	GO:0006269	0.04668406703764095	4	312	3	5979	ENSG00000101868,ENSG00000146143,ENSG00000198056
56	protein	positive	GO:BP	regulation of microvillus length	GO:0032532	0.04668406703764095	4	312	3	5979	ENSG00000092820,ENSG00000127831,ENSG00000247596
57	protein	positive	TF	Factor: GKLF; motif: NNNRGGNGNGGSN; match class: 1	TF:M07289_1	0.00026968213558110183	3715	321	235	6295	ENSG00000004961,ENSG00000006757,ENSG00000008294,ENSG00000014216,ENSG00000022267,ENSG00000024422,ENSG00000031698,ENSG00000035403,ENSG00000039523,ENSG00000042493,ENSG00000044446,ENSG00000058729,ENSG00000063601,ENSG00000065833,ENSG00000067225,ENSG00000067992,ENSG00000068323,ENSG00000068366,ENSG00000069869,ENSG00000070770,ENSG00000071127,ENSG00000071564,ENSG00000072501,ENSG00000073712,ENSG00000075624…
58	protein	positive	TF	Factor: ZNF692; motif: SYNGGSCCCASCCNC; match class: 1	TF:M09734_1	0.005806849854989103	2124	321	148	6295	ENSG00000008294,ENSG00000014216,ENSG00000024422,ENSG00000029993,ENSG00000031698,ENSG00000035403,ENSG00000039523,ENSG00000042493,ENSG00000063601,ENSG00000066629,ENSG00000067225,ENSG00000067992,ENSG00000068366,ENSG00000071564,ENSG00000073712,ENSG00000075624,ENSG00000076716,ENSG00000077150,ENSG00000077721,ENSG00000086712,ENSG00000092820,ENSG00000096060,ENSG00000099940,ENSG00000100097,ENSG00000101911…
59	protein	positive	TF	Factor: SALL2; motif: GGGTGGG; match class: 1	TF:M04595_1	0.020463716679468832	2417	321	159	6295	ENSG00000008294,ENSG00000014216,ENSG00000024422,ENSG00000031698,ENSG00000039523,ENSG00000042493,ENSG00000063601,ENSG00000067225,ENSG00000067992,ENSG00000068366,ENSG00000070718,ENSG00000070770,ENSG00000071127,ENSG00000072501,ENSG00000075624,ENSG00000076706,ENSG00000076716,ENSG00000077274,ENSG00000077721,ENSG00000082458,ENSG00000086102,ENSG00000086712,ENSG00000089159,ENSG00000090013,ENSG00000090924…
60	protein	positive	TF	Factor: KLF; motif: GGGNGGGG; match class: 0	TF:M07461_0	0.020463716679468832	2895	321	184	6295	ENSG00000006757,ENSG00000008294,ENSG00000014216,ENSG00000024422,ENSG00000029993,ENSG00000031698,ENSG00000039523,ENSG00000063601,ENSG00000067225,ENSG00000067992,ENSG00000068366,ENSG00000071127,ENSG00000071564,ENSG00000072501,ENSG00000073712,ENSG00000075624,ENSG00000076706,ENSG00000076716,ENSG00000077274,ENSG00000077721,ENSG00000082458,ENSG00000086102,ENSG00000089159,ENSG00000089234,ENSG00000090013…
61	protein	positive	TF	Factor: KLF; motif: GGGNGGGG	TF:M07461	0.020463716679468832	2895	321	184	6295	ENSG00000006757,ENSG00000008294,ENSG00000014216,ENSG00000024422,ENSG00000029993,ENSG00000031698,ENSG00000039523,ENSG00000063601,ENSG00000067225,ENSG00000067992,ENSG00000068366,ENSG00000071127,ENSG00000071564,ENSG00000072501,ENSG00000073712,ENSG00000075624,ENSG00000076706,ENSG00000076716,ENSG00000077274,ENSG00000077721,ENSG00000082458,ENSG00000086102,ENSG00000089159,ENSG00000089234,ENSG00000090013…
62	protein	positive	TF	Factor: HIC1; motif: NNNGGKTGCCCSNNNNNN	TF:M01073	0.020463716679468832	1413	321	104	6295	ENSG00000004961,ENSG00000005448,ENSG00000022267,ENSG00000024422,ENSG00000024862,ENSG00000044446,ENSG00000047230,ENSG00000063601,ENSG00000066629,ENSG00000067225,ENSG00000067992,ENSG00000068366,ENSG00000070770,ENSG00000071564,ENSG00000075624,ENSG00000076706,ENSG00000082458,ENSG00000086712,ENSG00000089022,ENSG00000092148,ENSG00000092820,ENSG00000096717,ENSG00000101421,ENSG00000101911,ENSG00000102030…
63	protein	positive	TF	Factor: HIC1; motif: NNNGGKTGCCCSNNNNNN; match class: 0	TF:M01073_0	0.020463716679468832	1413	321	104	6295	ENSG00000004961,ENSG00000005448,ENSG00000022267,ENSG00000024422,ENSG00000024862,ENSG00000044446,ENSG00000047230,ENSG00000063601,ENSG00000066629,ENSG00000067225,ENSG00000067992,ENSG00000068366,ENSG00000070770,ENSG00000071564,ENSG00000075624,ENSG00000076706,ENSG00000082458,ENSG00000086712,ENSG00000089022,ENSG00000092148,ENSG00000092820,ENSG00000096717,ENSG00000101421,ENSG00000101911,ENSG00000102030…
64	protein	positive	TF	Factor: LKLF; motif: CNCCACCCS; match class: 0	TF:M08819_0	0.04101143061880263	1828	321	125	6295	ENSG00000008294,ENSG00000014216,ENSG00000029993,ENSG00000031698,ENSG00000039523,ENSG00000063601,ENSG00000067225,ENSG00000067992,ENSG00000068366,ENSG00000071127,ENSG00000071564,ENSG00000072501,ENSG00000073712,ENSG00000075624,ENSG00000076706,ENSG00000077721,ENSG00000082458,ENSG00000086102,ENSG00000089159,ENSG00000090924,ENSG00000096060,ENSG00000096717,ENSG00000099940,ENSG00000100097,ENSG00000101966…
65	protein	positive	TF	Factor: LKLF; motif: CNCCACCCS	TF:M08819	0.04101143061880263	1828	321	125	6295	ENSG00000008294,ENSG00000014216,ENSG00000029993,ENSG00000031698,ENSG00000039523,ENSG00000063601,ENSG00000067225,ENSG00000067992,ENSG00000068366,ENSG00000071127,ENSG00000071564,ENSG00000072501,ENSG00000073712,ENSG00000075624,ENSG00000076706,ENSG00000077721,ENSG00000082458,ENSG00000086102,ENSG00000089159,ENSG00000090924,ENSG00000096060,ENSG00000096717,ENSG00000099940,ENSG00000100097,ENSG00000101966…
66	protein	positive	TF	Factor: JUNB:FRA-2; motif: NRTGASTCAT; match class: 1	TF:M08923_1	0.04101143061880263	428	321	41	6295	ENSG00000008294,ENSG00000022267,ENSG00000067225,ENSG00000068323,ENSG00000068366,ENSG00000077150,ENSG00000101421,ENSG00000101935,ENSG00000101966,ENSG00000102271,ENSG00000105289,ENSG00000107130,ENSG00000108821,ENSG00000114784,ENSG00000120885,ENSG00000123130,ENSG00000123131,ENSG00000130176,ENSG00000130479,ENSG00000130985,ENSG00000131203,ENSG00000133083,ENSG00000147224,ENSG00000156697,ENSG00000158710…
67	protein	positive	TF	Factor: ZNF692; motif: SYNGGSCCCASCCNC	TF:M09734	0.049577698621020065	4087	321	238	6295	ENSG00000004961,ENSG00000006757,ENSG00000008294,ENSG00000014216,ENSG00000022267,ENSG00000024422,ENSG00000025800,ENSG00000029993,ENSG00000031698,ENSG00000035403,ENSG00000039523,ENSG00000042493,ENSG00000044446,ENSG00000047230,ENSG00000063601,ENSG00000065833,ENSG00000066629,ENSG00000067225,ENSG00000067992,ENSG00000068323,ENSG00000068366,ENSG00000071127,ENSG00000071564,ENSG00000072501,ENSG00000073712…
68	protein	positive	TF	Factor: EGR1; motif: NCNCCGCCCCCGCN	TF:M07208	0.049577698621020065	2425	321	155	6295	ENSG00000006757,ENSG00000022267,ENSG00000029993,ENSG00000031698,ENSG00000035403,ENSG00000044446,ENSG00000052126,ENSG00000063601,ENSG00000065833,ENSG00000067992,ENSG00000068366,ENSG00000069869,ENSG00000070718,ENSG00000070770,ENSG00000071127,ENSG00000073712,ENSG00000076706,ENSG00000076716,ENSG00000077150,ENSG00000077721,ENSG00000089159,ENSG00000090924,ENSG00000091164,ENSG00000092148,ENSG00000092820…
69	protein	positive	TF	Factor: PUR1; motif: GGGNCAGNN; match class: 0	TF:M01721_0	0.049577698621020065	3003	321	185	6295	ENSG00000013503,ENSG00000014216,ENSG00000024422,ENSG00000035403,ENSG00000039523,ENSG00000044446,ENSG00000047230,ENSG00000052126,ENSG00000065833,ENSG00000066629,ENSG00000067992,ENSG00000068323,ENSG00000070770,ENSG00000071127,ENSG00000071564,ENSG00000073712,ENSG00000075624,ENSG00000075975,ENSG00000076716,ENSG00000077150,ENSG00000082458,ENSG00000086102,ENSG00000086712,ENSG00000089159,ENSG00000089234…
70	protein	positive	TF	Factor: PUR1; motif: GGGNCAGNN	TF:M01721	0.049577698621020065	3003	321	185	6295	ENSG00000013503,ENSG00000014216,ENSG00000024422,ENSG00000035403,ENSG00000039523,ENSG00000044446,ENSG00000047230,ENSG00000052126,ENSG00000065833,ENSG00000066629,ENSG00000067992,ENSG00000068323,ENSG00000070770,ENSG00000071127,ENSG00000071564,ENSG00000073712,ENSG00000075624,ENSG00000075975,ENSG00000076716,ENSG00000077150,ENSG00000082458,ENSG00000086102,ENSG00000086712,ENSG00000089159,ENSG00000089234…
71	protein	positive	TF	Factor: PLAG1; motif: CCCCCKWNNNGGSCCC; match class: 1	TF:M01973_1	0.049577698621020065	895	321	69	6295	ENSG00000006757,ENSG00000014216,ENSG00000044446,ENSG00000052126,ENSG00000063601,ENSG00000075624,ENSG00000076706,ENSG00000077150,ENSG00000086712,ENSG00000089159,ENSG00000092148,ENSG00000092820,ENSG00000101421,ENSG00000101911,ENSG00000101972,ENSG00000102030,ENSG00000102038,ENSG00000102119,ENSG00000102572,ENSG00000104093,ENSG00000105810,ENSG00000106299,ENSG00000106605,ENSG00000107130,ENSG00000110514…
72	protein	positive	TF	Factor: EGR1; motif: NCNCCGCCCCCGCN; match class: 0	TF:M07208_0	0.049577698621020065	2425	321	155	6295	ENSG00000006757,ENSG00000022267,ENSG00000029993,ENSG00000031698,ENSG00000035403,ENSG00000044446,ENSG00000052126,ENSG00000063601,ENSG00000065833,ENSG00000067992,ENSG00000068366,ENSG00000069869,ENSG00000070718,ENSG00000070770,ENSG00000071127,ENSG00000073712,ENSG00000076706,ENSG00000076716,ENSG00000077150,ENSG00000077721,ENSG00000089159,ENSG00000090924,ENSG00000091164,ENSG00000092148,ENSG00000092820…
73	protein	positive	TF	Factor: C-FOS:C-JUN; motif: ATGAGTCAYN; match class: 1	TF:M08942_1	0.049577698621020065	208	321	24	6295	ENSG00000022267,ENSG00000068323,ENSG00000068366,ENSG00000101966,ENSG00000105289,ENSG00000108821,ENSG00000120885,ENSG00000123130,ENSG00000126247,ENSG00000130479,ENSG00000130985,ENSG00000131203,ENSG00000147224,ENSG00000160789,ENSG00000177106,ENSG00000179750,ENSG00000182718,ENSG00000186174,ENSG00000186310,ENSG00000196998,ENSG00000197747,ENSG00000198554,ENSG00000204386,ENSG00000215301
74	protein	positive	TF	Factor: ZNF692; motif: SYNGGSCCCASCCNC; match class: 0	TF:M09734_0	0.049577698621020065	4087	321	238	6295	ENSG00000004961,ENSG00000006757,ENSG00000008294,ENSG00000014216,ENSG00000022267,ENSG00000024422,ENSG00000025800,ENSG00000029993,ENSG00000031698,ENSG00000035403,ENSG00000039523,ENSG00000042493,ENSG00000044446,ENSG00000047230,ENSG00000063601,ENSG00000065833,ENSG00000066629,ENSG00000067225,ENSG00000067992,ENSG00000068323,ENSG00000068366,ENSG00000071127,ENSG00000071564,ENSG00000072501,ENSG00000073712…
75	protein	positive	TF	Factor: c-Jun; motif: NNNNRRTGASTCAN; match class: 1	TF:M07102_1	0.049577698621020065	830	321	66	6295	ENSG00000008294,ENSG00000022267,ENSG00000039523,ENSG00000065833,ENSG00000067225,ENSG00000068323,ENSG00000068366,ENSG00000077150,ENSG00000077274,ENSG00000086102,ENSG00000087842,ENSG00000096060,ENSG00000101421,ENSG00000101868,ENSG00000101871,ENSG00000101935,ENSG00000101966,ENSG00000102054,ENSG00000102271,ENSG00000105289,ENSG00000107130,ENSG00000107554,ENSG00000108821,ENSG00000108828,ENSG00000114784…
76	protein	positive	TF	Factor: JUNB:FRA-2; motif: NRTGASTCAT; match class: 0	TF:M08923_0	0.049577698621020065	823	321	65	6295	ENSG00000008294,ENSG00000022267,ENSG00000039523,ENSG00000065833,ENSG00000067225,ENSG00000068323,ENSG00000068366,ENSG00000077150,ENSG00000077274,ENSG00000086102,ENSG00000090013,ENSG00000101421,ENSG00000101868,ENSG00000101935,ENSG00000101966,ENSG00000102054,ENSG00000102271,ENSG00000105289,ENSG00000107130,ENSG00000108821,ENSG00000108828,ENSG00000114784,ENSG00000117676,ENSG00000120885,ENSG00000120963…
77	protein	positive	TF	Factor: JUNB:FRA-2; motif: NRTGASTCAT	TF:M08923	0.049577698621020065	823	321	65	6295	ENSG00000008294,ENSG00000022267,ENSG00000039523,ENSG00000065833,ENSG00000067225,ENSG00000068323,ENSG00000068366,ENSG00000077150,ENSG00000077274,ENSG00000086102,ENSG00000090013,ENSG00000101421,ENSG00000101868,ENSG00000101935,ENSG00000101966,ENSG00000102054,ENSG00000102271,ENSG00000105289,ENSG00000107130,ENSG00000108821,ENSG00000108828,ENSG00000114784,ENSG00000117676,ENSG00000120885,ENSG00000120963…
78	protein	positive	TF	Factor: JUNB:C-FOS; motif: NATGAGTCATNN; match class: 1	TF:M08925_1	0.049577698621020065	371	321	36	6295	ENSG00000022267,ENSG00000067225,ENSG00000068323,ENSG00000068366,ENSG00000077150,ENSG00000101935,ENSG00000101966,ENSG00000102271,ENSG00000105289,ENSG00000108821,ENSG00000114784,ENSG00000120885,ENSG00000123130,ENSG00000130176,ENSG00000130479,ENSG00000130985,ENSG00000131203,ENSG00000133083,ENSG00000147224,ENSG00000156697,ENSG00000158710,ENSG00000160789,ENSG00000162458,ENSG00000171724,ENSG00000176485…
79	protein	positive	TF	Factor: JUNB:FOSB; motif: NRTGASTCAT; match class: 0	TF:M08920_0	0.049577698621020065	919	321	71	6295	ENSG00000008294,ENSG00000022267,ENSG00000039523,ENSG00000065833,ENSG00000067225,ENSG00000068323,ENSG00000068366,ENSG00000077150,ENSG00000077274,ENSG00000086102,ENSG00000087842,ENSG00000090013,ENSG00000101421,ENSG00000101868,ENSG00000101935,ENSG00000101966,ENSG00000102054,ENSG00000102230,ENSG00000102271,ENSG00000105289,ENSG00000107130,ENSG00000107554,ENSG00000108821,ENSG00000108828,ENSG00000114784…
80	protein	positive	TF	Factor: JUNB:FOSB; motif: NRTGASTCAT	TF:M08920	0.049577698621020065	919	321	71	6295	ENSG00000008294,ENSG00000022267,ENSG00000039523,ENSG00000065833,ENSG00000067225,ENSG00000068323,ENSG00000068366,ENSG00000077150,ENSG00000077274,ENSG00000086102,ENSG00000087842,ENSG00000090013,ENSG00000101421,ENSG00000101868,ENSG00000101935,ENSG00000101966,ENSG00000102054,ENSG00000102230,ENSG00000102271,ENSG00000105289,ENSG00000107130,ENSG00000107554,ENSG00000108821,ENSG00000108828,ENSG00000114784…
81	protein	positive	TF	Factor: KLF; motif: GGGNGGGG; match class: 1	TF:M07461_1	0.049577698621020065	1087	321	82	6295	ENSG00000008294,ENSG00000014216,ENSG00000024422,ENSG00000031698,ENSG00000039523,ENSG00000063601,ENSG00000067225,ENSG00000067992,ENSG00000075624,ENSG00000076706,ENSG00000077721,ENSG00000082458,ENSG00000086102,ENSG00000089159,ENSG00000090924,ENSG00000096060,ENSG00000100097,ENSG00000101966,ENSG00000101972,ENSG00000102038,ENSG00000102225,ENSG00000102572,ENSG00000105810,ENSG00000108821,ENSG00000108828…
82	protein	positive	TF	Factor: c-Fos; motif: NNTGASTCATN; match class: 1	TF:M07090_1	0.049577698621020065	466	321	42	6295	ENSG00000022267,ENSG00000039523,ENSG00000068323,ENSG00000068366,ENSG00000077150,ENSG00000086102,ENSG00000090013,ENSG00000101868,ENSG00000101966,ENSG00000102271,ENSG00000105289,ENSG00000108821,ENSG00000108828,ENSG00000114784,ENSG00000117676,ENSG00000120885,ENSG00000120963,ENSG00000123130,ENSG00000125868,ENSG00000126247,ENSG00000128591,ENSG00000130479,ENSG00000130985,ENSG00000131203,ENSG00000143320…
0	protein_only	negative	GO:BP	mitochondrial respiratory chain complex assembly	GO:0033108	0.0006090726563502911	66	165	12	5979	ENSG00000110717,ENSG00000119013,ENSG00000136521,ENSG00000137288,ENSG00000140990,ENSG00000151413,ENSG00000158864,ENSG00000164258,ENSG00000170906,ENSG00000183648,ENSG00000183978,ENSG00000184983
1	protein_only	negative	GO:BP	NADH dehydrogenase complex assembly	GO:0010257	0.0008430324056172423	50	165	10	5979	ENSG00000110717,ENSG00000119013,ENSG00000136521,ENSG00000140990,ENSG00000151413,ENSG00000158864,ENSG00000164258,ENSG00000170906,ENSG00000183648,ENSG00000184983
2	protein_only	negative	GO:BP	mitochondrial respiratory chain complex I assembly	GO:0032981	0.0008430324056172423	50	165	10	5979	ENSG00000110717,ENSG00000119013,ENSG00000136521,ENSG00000140990,ENSG00000151413,ENSG00000158864,ENSG00000164258,ENSG00000170906,ENSG00000183648,ENSG00000184983
3	protein_only	negative	GO:BP	mitochondrial electron transport, NADH to ubiquinone	GO:0006120	0.0008430324056172423	40	165	9	5979	ENSG00000110717,ENSG00000119013,ENSG00000136521,ENSG00000140990,ENSG00000158864,ENSG00000164258,ENSG00000170906,ENSG00000183648,ENSG00000184983
4	protein_only	negative	GO:BP	oxidation-reduction process	GO:0055114	0.0020415730010452755	515	165	33	5979	ENSG00000014919,ENSG00000080819,ENSG00000084092,ENSG00000104823,ENSG00000107537,ENSG00000110717,ENSG00000119013,ENSG00000120254,ENSG00000122378,ENSG00000127884,ENSG00000128928,ENSG00000133835,ENSG00000134824,ENSG00000136521,ENSG00000138029,ENSG00000140632,ENSG00000140990,ENSG00000143811,ENSG00000145439,ENSG00000145882,ENSG00000156521,ENSG00000158864,ENSG00000161267,ENSG00000164258,ENSG00000165672…
5	protein_only	negative	GO:BP	mitochondrion organization	GO:0007005	0.002206574168125775	312	165	24	5979	ENSG00000110717,ENSG00000116688,ENSG00000119013,ENSG00000119705,ENSG00000136521,ENSG00000137288,ENSG00000140983,ENSG00000140990,ENSG00000151413,ENSG00000158864,ENSG00000164258,ENSG00000165283,ENSG00000165672,ENSG00000165775,ENSG00000166575,ENSG00000167085,ENSG00000170906,ENSG00000173726,ENSG00000173786,ENSG00000183648,ENSG00000183978,ENSG00000184983,ENSG00000198925,ENSG00000213585
6	protein_only	negative	GO:BP	oxidative phosphorylation	GO:0006119	0.003064889428141238	91	165	12	5979	ENSG00000014919,ENSG00000110717,ENSG00000119013,ENSG00000136521,ENSG00000137288,ENSG00000140990,ENSG00000158864,ENSG00000164258,ENSG00000165283,ENSG00000170906,ENSG00000183648,ENSG00000184983
7	protein_only	negative	GO:BP	mitochondrial ATP synthesis coupled electron transport	GO:0042775	0.003515857098811173	64	165	10	5979	ENSG00000014919,ENSG00000110717,ENSG00000119013,ENSG00000136521,ENSG00000140990,ENSG00000158864,ENSG00000164258,ENSG00000170906,ENSG00000183648,ENSG00000184983
8	protein_only	negative	GO:BP	ATP synthesis coupled electron transport	GO:0042773	0.0036065714741774064	65	165	10	5979	ENSG00000014919,ENSG00000110717,ENSG00000119013,ENSG00000136521,ENSG00000140990,ENSG00000158864,ENSG00000164258,ENSG00000170906,ENSG00000183648,ENSG00000184983
9	protein_only	negative	GO:BP	fatty acid catabolic process	GO:0009062	0.00639492610069239	56	165	9	5979	ENSG00000104823,ENSG00000107537,ENSG00000127884,ENSG00000128928,ENSG00000133835,ENSG00000138029,ENSG00000156521,ENSG00000167114,ENSG00000198721
10	protein_only	negative	GO:BP	respiratory electron transport chain	GO:0022904	0.013593366862591636	77	165	10	5979	ENSG00000014919,ENSG00000110717,ENSG00000119013,ENSG00000136521,ENSG00000140990,ENSG00000158864,ENSG00000164258,ENSG00000170906,ENSG00000183648,ENSG00000184983
11	protein_only	negative	GO:BP	mitochondrial translation	GO:0032543	0.014102216752494118	112	165	12	5979	ENSG00000084092,ENSG00000130312,ENSG00000132591,ENSG00000132676,ENSG00000137288,ENSG00000143436,ENSG00000148187,ENSG00000156990,ENSG00000167862,ENSG00000178952,ENSG00000179271,ENSG00000183978
12	protein_only	negative	GO:BP	mitochondrial gene expression	GO:0140053	0.014102216752494118	130	165	13	5979	ENSG00000084092,ENSG00000130312,ENSG00000132591,ENSG00000132676,ENSG00000137288,ENSG00000143436,ENSG00000148187,ENSG00000156990,ENSG00000167862,ENSG00000177192,ENSG00000178952,ENSG00000179271,ENSG00000183978
13	protein_only	negative	GO:BP	monocarboxylic acid catabolic process	GO:0072329	0.01761673517655576	66	165	9	5979	ENSG00000104823,ENSG00000107537,ENSG00000127884,ENSG00000128928,ENSG00000133835,ENSG00000138029,ENSG00000156521,ENSG00000167114,ENSG00000198721
14	protein_only	negative	GO:BP	zinc ion import across plasma membrane	GO:0071578	0.018576281057944836	4	165	3	5979	ENSG00000104635,ENSG00000170385,ENSG00000196950
15	protein_only	negative	GO:BP	lipid oxidation	GO:0034440	0.02319105963558857	55	165	8	5979	ENSG00000104823,ENSG00000107537,ENSG00000127884,ENSG00000128928,ENSG00000133835,ENSG00000138029,ENSG00000156521,ENSG00000198721
16	protein_only	negative	GO:BP	fatty acid oxidation	GO:0019395	0.02319105963558857	55	165	8	5979	ENSG00000104823,ENSG00000107537,ENSG00000127884,ENSG00000128928,ENSG00000133835,ENSG00000138029,ENSG00000156521,ENSG00000198721
17	protein_only	negative	GO:BP	small molecule metabolic process	GO:0044281	0.03395433062017037	910	165	43	5979	ENSG00000065057,ENSG00000067064,ENSG00000073060,ENSG00000079459,ENSG00000085231,ENSG00000087053,ENSG00000093010,ENSG00000104823,ENSG00000107537,ENSG00000107789,ENSG00000112855,ENSG00000120254,ENSG00000122643,ENSG00000127884,ENSG00000128928,ENSG00000132182,ENSG00000132541,ENSG00000133835,ENSG00000134824,ENSG00000136731,ENSG00000137513,ENSG00000138029,ENSG00000138074,ENSG00000141027,ENSG00000143811…
18	protein_only	negative	GO:BP	fatty acid beta-oxidation	GO:0006635	0.03647071713393859	45	165	7	5979	ENSG00000104823,ENSG00000127884,ENSG00000128928,ENSG00000133835,ENSG00000138029,ENSG00000156521,ENSG00000198721
19	protein_only	negative	REAC	Complex I biogenesis	REAC:R-HSA-6799198	8.822151937151435e-05	43	115	10	4147	ENSG00000110717,ENSG00000119013,ENSG00000136521,ENSG00000140990,ENSG00000151413,ENSG00000158864,ENSG00000164258,ENSG00000170906,ENSG00000183648,ENSG00000184983
20	protein_only	negative	REAC	Respiratory electron transport	REAC:R-HSA-611105	0.009034399197962412	75	115	10	4147	ENSG00000110717,ENSG00000119013,ENSG00000136521,ENSG00000140990,ENSG00000151413,ENSG00000158864,ENSG00000164258,ENSG00000170906,ENSG00000183648,ENSG00000184983
21	protein_only	negative	REAC	Respiratory electron transport, ATP synthesis by chemiosmotic coupling, and heat production by uncoupling proteins.	REAC:R-HSA-163200	0.019903804793796116	86	115	10	4147	ENSG00000110717,ENSG00000119013,ENSG00000136521,ENSG00000140990,ENSG00000151413,ENSG00000158864,ENSG00000164258,ENSG00000170906,ENSG00000183648,ENSG00000184983
22	protein_only	negative	REAC	Metal ion SLC transporters	REAC:R-HSA-425410	0.03564595693116228	6	115	3	4147	ENSG00000104635,ENSG00000170385,ENSG00000196950
23	protein_only	negative	REAC	SLC-mediated transmembrane transport	REAC:R-HSA-425407	0.03564595693116228	47	115	7	4147	ENSG00000064651,ENSG00000104635,ENSG00000105281,ENSG00000138074,ENSG00000167114,ENSG00000170385,ENSG00000196950
24	protein_only	negative	REAC	Zinc transporters	REAC:R-HSA-435354	0.03564595693116228	6	115	3	4147	ENSG00000104635,ENSG00000170385,ENSG00000196950
25	protein_only	negative	REAC	The citric acid (TCA) cycle and respiratory electron transport	REAC:R-HSA-1428517	0.04351655795557904	124	115	11	4147	ENSG00000110717,ENSG00000119013,ENSG00000136521,ENSG00000140990,ENSG00000151413,ENSG00000158864,ENSG00000164258,ENSG00000170906,ENSG00000183648,ENSG00000184983,ENSG00000213585
26	protein_only	negative	REAC	TYSND1 cleaves peroxisomal proteins	REAC:R-HSA-9033500	0.04584036748995506	7	115	3	4147	ENSG00000107537,ENSG00000133835,ENSG00000156521
0	protein_only	positive	REAC	Telomere C-strand synthesis initiation	REAC:R-HSA-174430	0.043197125300706116	8	83	3	4147	ENSG00000014138,ENSG00000146143,ENSG00000198056
1	protein_only	positive	REAC	Cell-extracellular matrix interactions	REAC:R-HSA-446353	0.043197125300706116	15	83	4	4147	ENSG00000073712,ENSG00000089159,ENSG00000162458,ENSG00000196924
2	protein_only	positive	REAC	DNA replication initiation	REAC:R-HSA-68952	0.043197125300706116	8	83	3	4147	ENSG00000014138,ENSG00000146143,ENSG00000198056
3	protein_only	positive	REAC	E2F mediated regulation of DNA replication	REAC:R-HSA-113510	0.043197125300706116	18	83	4	4147	ENSG00000014138,ENSG00000146143,ENSG00000164815,ENSG00000198056
