# Supplementary material for: Population-scale proteome variation in human induced pluripotent stem cells
Source: eLife. 2020 Aug 10;9:e57390. doi: 10.7554/eLife.57390 (PMC7447446; doi:10.7554/eLife.57390)
Supplement: Figure 2—source data 1. — The list of significant (FDR < 10%) genes with a pQTL provided as a supplementary file. Data fields are described in the table below. [file elife-57390-fig2-data1.xls]

ensembl_gene_id	gene_name	feature_id	protein_id	snp_id	snp_rsid	q-value	empirical_feature_p_value	number_features	protein_p_value_p_value_bonf	protein_eff_size	peptide_nominal_p_value_bonf	peptide_eff_size	transcript_nominal_p_value_bonf	transcript_eff_size	mrna_nominal_p_value_bonf	mrna_eff_size	replicated_any_rna	protein_nlines	protein_intensity	protein_cv	protein_npeptides	protein_ce	in_corum	ld_snps	inframe_LD	frameshift_LD	splicing_LD	UTR_LD	intron_LD	NMD_transcript_LD	synonymous_LD	maf_hipsci	is_in_LD_UTR_variant	is_in_LD_frameshift_variant	is_in_LD_inframe_variant	is_in_LD_intron_variant	is_in_LD_splicing_variant	is_in_LD_synonymous_variant	peptides_same_effect_direction	number_assesed_peptides	gwas_snp	gwas_snp_rsid	gwas_trait	gwas_p_value	colocalization_trait	colocalization_CLPP_region	colocalization_CLPP_pqtl	number_gtex_tissues	min_nominal_pv_gtex
ENSG00000001036	FUCA2	Q9BTY2	Q9BTY2	6_143825104_G_T		0.000994345	2.55e-05	1	1.94e-09	0.64537679	2.25e-07	1.340478354	0.069385819	0.191592949	0.051514269	0.19478592	False	202	7263252.828	0.157966345	12	0.126753825	False	143825104	6_143825104_G_T;							0.277227723	False	False	True	False	False	False	12.0	12.0								1	3.53e-05
ENSG00000001561	ENPP4	Q9Y6X5	Q9Y6X5	6_46112389_A_G		0.000194312	3.93e-06	1	1.65e-08	0.55584498	1.36e-05	0.5558820720000001	2e-06	0.350339245	4.83e-07	0.429903488	True	185	2061507.233	0.206462269	5	0.326893175	False	###############################################################################################################################################################################################################################################################				6_46097758_C_G;6_46112389_A_G;	6_46109997_A_G;			0.324257426	True	False	False	True	False	False	5.0	5.0	6_46128745;6_46145461	rs1047153;rs2223776	Blood protein levels;General cognitive ability					6	1.55e-31
ENSG00000003056	M6PR	P20645	P20645	12_9082581_A_G		0.022321816	0.001106434	1	1.39e-06	-0.7450598140000001	1.15e-06	-0.8409335240000001	1.3e-24	-0.551705921	0.00026859700000000003	-0.379971865	True	202	14195148.53	0.211557753	11	0.130044882	False	90,825,819,098,995	12_9098995_G_GAAC;	12_9098995_G_GAAC;			12_9098995_G_GAAC;	12_9098995_G_GAAC;		0.08663366300000001	False	True	True	True	False	False	8.0	8.0	12_9082581;12_9082581;12_9082581	rs4883201;rs4883201;rs4883201	Cholesterol, total;High density lipoprotein cholesterol levels;Total cholesterol levels					19	6.879999999999999e-31
ENSG00000003509	NDUFAF7	Q7L592	Q7L592	2_37480249_A_G	rs1056021	0.021273405	0.001040885	1	1.3e-06	-0.432919908	1.33e-08	-0.454236688	1.73e-21	-0.662989529	5.34e-06	-0.369493852	True	202	15814019.39	0.159052051	19	0.100182256	False	37480249				2_37480249_A_G;		2_37480249_A_G;		0.309405941	True	False	False	False	False	False	19.0	19.0								7	1.06e-21
ENSG00000005436	GCFC2	P16383	P16383	2_75881264_G_T	rs7592795	0.009015018	0.000366172	1	1.1e-07	0.50032005	4.19e-07	0.775846782	9.98e-16	0.493793578	1.21e-13	0.6426946720000001	True	202	2688747.917	0.252827266	11	0.223444052	False	75881264,75857892,75859919,75860271,75861744,75862484,75862704,75863450,75878618,75880366,75880374,75881828,75882576,75883390,75883878,75884988,75886066,75886643,75887579,75887834,75888096,75888160,75890408,75890540,75892319,75895978,75903170,75903864,75905719,75911977,75911985,75913517,75914063,75915035,75917612,75918070,75919500,75921232,75928300,75929130,75929238,75930048,75931589,75931600,759…		2_75934688_TA_T;2_75921232_G_GCTTA;2_75919500_AG_A;2_75891914_AAAACAAAACAAATTTCTCCCTTTAAAAATGCAATGTATGAGGGAACAGCGGTCAATTCAGAACCTGATCATCAGTTGTTAATCTAAAACAAAAGCTTTACCTTAAGCCAATATCTAAAGTAGCATAAAACACAGAGAGATGCTGCCATCTCCACTTAATTATAAAGTTCAAATACAGATCATTAGTGGATGTATTCTGGCAAATTTCAATGTGAATTACTGTAAAAGGTAGAAAAGCATATAGTAAGTCTATCAGAAATTTCAGTAGTGCTGCGTTGCTATTAGCTTGTATGAGACATTGTGGTGGAAGCAATGGTGGGAGTATATTCACACATCA…	2_75891914_AAAACAAAACAAATTTCTCCCTTTAAAAATGCAATGTATGAGGGAACAGCGGTCAATTCAGAACCTGATCATCAGTTGTTAATCTAAAACAAAAGCTTTACCTTAAGCCAATATCTAAAGTAGCATAAAACACAGAGAGATGCTGCCATCTCCACTTAATTATAAAGTTCAAATACAGATCATTAGTGGATGTATTCTGGCAAATTTCAATGTGAATTACTGTAAAAGGTAGAAAAGCATATAGTAAGTCTATCAGAAATTTCAGTAGTGCTGCGTTGCTATTAGCTTGTATGAGACATTGTGGTGGAAGCAATGGTGGGAGTATATTCACACATCATGACATTAGCAAATAATACAAATCTGATTTTTTTTTTTTTTAAAGGGACTT…	2_75929238_C_A;2_75929130_C_A;2_75915035_C_T;2_75891914_AAAACAAAACAAATTTCTCCCTTTAAAAATGCAATGTATGAGGGAACAGCGGTCAATTCAGAACCTGATCATCAGTTGTTAATCTAAAACAAAAGCTTTACCTTAAGCCAATATCTAAAGTAGCATAAAACACAGAGAGATGCTGCCATCTCCACTTAATTATAAAGTTCAAATACAGATCATTAGTGGATGTATTCTGGCAAATTTCAATGTGAATTACTGTAAAAGGTAGAAAAGCATATAGTAAGTCTATCAGAAATTTCAGTAGTGCTGCGTTGCTATTAGCTTGTATGAGACATTGTGGTGGAAGCAATGGTGGGAGTATATTCACACATCATGACAT…	2_75936976_C_G;2_75936935_T_A;2_75935894_T_C;2_75935614_A_T;2_75935038_C_G;2_75934688_T_A;2_75934688_TA_T;2_75933830_T_A;2_75932846_C_T;2_75931600_T_G;2_75931589_T_A;2_75930048_C_G;2_75929238_C_A;2_75929130_C_A;2_75928300_G_T;2_75921232_G_GCTTA;2_75919500_AG_A;2_75919500_A_C;2_75918070_T_G;2_75917612_G_A;2_75913517_C_G;2_75911985_T_C;2_75911977_G_A;2_75905719_C_T;2_75903864_T_C;2_75903170_A_G;2_7…		2_75915035_C_T;	0.363861386	True	True	False	True	True	True	11.0	11.0								15	2.77e-40
ENSG00000006047	YBX2	Q9Y2T7	Q9Y2T7	17_7197794_C_A	rs222859	1.04e-06	1.1100000000000002e-08	1	3.16e-13	0.792207198	6.75e-10	0.8803459140000001	2.36e-08	0.451838718	2.69e-06	0.37224863	True	192	2100826.367	0.242187877	6	0.328607928	False	7197794	17_7197794_C_A;							0.205445545	False	False	True	False	False	False	6.0	6.0								1	3.05e-05
ENSG00000006282	SPATA20	A0A0U1RRL8	A0A0U1RRL8	17_48615329_G_A	rs2306001	5.27e-07	5.18e-09	1	2.79e-14	-1.051656025	4.94e-14	-1.678412592	1.46e-42	-1.556241626	1.52e-32	-1.488188509	True	202	1105529.571	0.256600881	7	0.232242036	False	486,153,294,861,199,000,000,000,000,000,000,000,000,000,000,000,000,000,000,000,000,000,000,000		17_48625307_GGGGGAGGGGCCT_G;			17_48625307_GGGGGAGGGGCCT_G;17_48625223_C_T;			0.123762376	False	True	False	True	False	False	7.0	7.0								44	1.57e-40
ENSG00000007047	MARK4	Q96L34	Q96L34	19_45879195_T_G	rs76265504	0.040433059	0.002281252	1	5.44e-08	-1.19612253	0.442070244	-0.333478853	0.06695259099999999	-0.403791533	0.546254303	-0.053258937	False	149	1884929.623	0.700861902	3	0.584311088	False	4,587,919,545,880,550								0.091584158	False	False	False	False	False	False	1.0	3.0								0
ENSG00000010322	NISCH	Q9Y2I1	Q9Y2I1	3_52464827_T_C	rs62257614	0.009636281	0.000394791	1	1.5399999999999998e-05	0.488106625	0.15729021699999998	0.410504571	2.458071594	0.078779154	0.339941114	0.034300357000000004	False	202	7179169.1060000025	0.122695469	21	0.375866038	False	5,246,482,752,289,700								0.217821782	False	False	False	False	False	False	17.0	21.0								0
ENSG00000011376	LARS2	Q15031	Q15031	3_45511026_C_T	rs3774690	0.000350524	7.95e-06	1	2.07e-10	-0.687423047	3.82e-07	-0.571851101	3.95e-20	-0.6457605	1.1399999999999999e-24	-0.70270251	True	202	25558424.0	0.119206442	33	0.092051972	False	45511026,45493876,45493941,45495358,45495927,45496144,45498342,45501088,45503903,45507305,45511266,45514884,45526812,45528423,45534973,45537973,45545451,45546577,45549298,45549807,45550661,45551898,45555700,45555765,45557707,45559621,45560113,45561149,45561203,45564439,45569582,45570065,45577250,45579533,45579699,45581959,45587983,45595459		3_45577250_ACACACACACCCCCACACC_A;3_45495927_AAACT_A;3_45493876_AT_A;			3_45587983_A_G;3_45581959_C_G;3_45579699_T_C;3_45579533_T_A;3_45577250_ACACACACACCCCCACACC_A;3_45570065_A_G;3_45569582_A_G;3_45564439_A_T;3_45561203_A_G;3_45560113_A_G;3_45559621_C_T;3_45555765_C_T;3_45555700_A_G;3_45551898_C_T;3_45550661_C_T;3_45549807_G_A;3_45549298_G_T;3_45546577_T_C;3_45545451_G_A;3_45537973_C_T;3_45534973_C_G;3_45528423_T_C;3_45526812_A_G;3_45511266_A_G;3_45507305_T_A;3_4550…		3_45557707_G_A;	0.277227723	False	True	False	True	False	True	32.0	33.0								42	2.2499999999999998e-41
ENSG00000013583	HEBP1	Q9NRV9	Q9NRV9	12_13186361_C_G	rs11055208	0.004570723	0.000159356	1	7.82e-08	-0.556035831	1.49e-05	-0.475327243	3.04e-13	-0.647915873	2.98e-15	-0.667976447	True	202	13252295.52	0.181857335	11	0.124309692	False	13186361								0.31188118800000003	False	False	False	False	False	False	11.0	11.0								9	1.43e-12
ENSG00000015676	NUDCD3	Q8IVD9	Q8IVD9	7_44553826_A_G	rs217432	0.007848175	0.000309591	1	2.36e-07	0.396558931	0.001349211	0.493852479	7.64e-13	0.5401266570000001	9.060000000000001e-16	0.422496126	True	202	10106494.6	0.14474182800000002	12	0.129735737	True	44553826,44377907,44377943,44394586,44398648,44400930,44403607,44405009,44424211,44424253,44434670,44439232,44442599,44455862,44456890,44466876,44470363,44471358,44487886,44490066,44498262,44502186,44502415,44509130,44522617,44524200,44525374,44525803,44526475,44530193,44532698,44533719,44536747,44538882,44539829,44545297,44545725,44545880,44551157,44552093,44552209,44553238,44553492,44553496	7_44530193_T_C;			7_44424253_C_T;7_44424211_T_C;	7_44526475_T_C;7_44525803_C_G;7_44525374_C_T;7_44524200_C_G;7_44522617_T_C;7_44509130_G_A;7_44502415_A_G;7_44502186_C_T;7_44490066_T_C;7_44487886_T_C;7_44471358_A_G;7_44470363_T_C;7_44466876_A_G;7_44456890_C_T;7_44455862_C_T;7_44442599_T_C;7_44439232_T_C;7_44434670_C_G;			0.242574257	True	False	True	True	False	False	12.0	12.0								32	3.189999999999998e-51
ENSG00000018699	TTC27	Q6P3X3	Q6P3X3	2_32903548_G_A	rs111896629	0.0014990510000000002	4.05e-05	1	2.14e-08	-0.672986425	2.23e-05	-0.7489840109999999	1.1399999999999998e-16	-0.752239155	3e-23	-1.039294911	True	202	12554908.6	0.185426712	25	0.143558221	False	3,290,354,832,891,360					2_32891365_T_G;2_32903548_G_A;	2_32891365_T_G;2_32903548_G_A;		0.111386139	False	False	False	True	False	False	19.0	23.0								37	5.269999999999997e-77
ENSG00000021355	SERPINB1	P30740	P30740	6_2842139_C_T		2.67e-07	2.41e-09	1	3.16e-13	-0.63500796	4.29e-08	-0.616643113	2.1499999999999997e-18	-0.932794672	3.47e-18	-0.723454928	True	202	9730849.821	0.205288227	17	0.148023076	False	2842139				6_2842139_C_T;				0.287128713	True	False	False	False	False	False	16.0	17.0								4	1.22e-19
ENSG00000021826	CPS1	P31327-3	P31327-3	2_211429515_G_A	rs13411696	0.001798097	5.09e-05	1	3.23e-08	-0.509029135	0.000275961	-0.6884865440000001	1.1e-09	-0.450682149	1.5499999999999998e-11	-0.473924935	True	202	10322474.63	0.219894428	31	0.16073925	False	211,429,515,211,348,000,000,000,000,000,000,000,000,000,000,000,000,000,000,000,000,000,000,000,000,000,000,000,000,000,000,000,000,000,000,000,000,000,000		2_211376259_TAAAC_T;2_211367102_TA_T;2_211367100_TATA_T;2_211367098_TATATA_T;			2_211386484_G_A;2_211381486_T_C;2_211380780_C_T;2_211376971_T_G;2_211376259_TAAAC_T;2_211370496_C_T;2_211367102_TA_T;2_211367100_TATA_T;2_211367098_TATATA_T;2_211357642_C_T;2_211355372_G_A;2_211349749_G_A;2_211349261_A_G;2_211348599_G_T;2_211429515_G_A;			0.49009901	False	True	False	True	False	False	31.0	31.0								18	1.41e-27
ENSG00000022277	RTFDC1	A0A0A0MQR2	A0A0A0MQR2	20_55030037_A_G	rs6024888	0.050566891	0.003024661	1	1.1e-06	-0.394330847	7.51e-08	-0.435821085	0.254409009	-0.257019787	0.521011667	-0.05026742	False	202	4930311.845	0.13911731900000002	11	0.15017340699999998	False	55030037,55030081,55035501,55040775,55045164,55047046,55049148,55053818,55055177,55055367,55059949,55061908,55062564,55064228,55064835,55069291,55072472,55073164,55075991,55076035,55079622,55080052,55081162,55081256,55081489,55084232,55085166,55086158,55087997,55088404,55097072,55098112,55099170,55099470	20_55088404_A_G;	20_55072471_TA_T;20_55059949_T_TG;			20_55087997_C_T;20_55086158_G_A;20_55085166_T_C;20_55084232_A_G;20_55081489_T_G;20_55081256_G_A;20_55081162_A_C;20_55080052_T_C;20_55079622_G_A;20_55076035_T_A;20_55075991_G_A;20_55072472_A_G;20_55072471_TA_T;20_55069291_T_G;20_55064835_T_G;20_55064228_T_C;20_55062564_G_A;20_55061908_A_G;20_55059949_T_G;20_55059949_T_TG;20_55055367_C_A;20_55055177_C_T;20_55053818_T_C;20_55049148_A_G;20_55047046_C…			0.198019802	False	True	True	True	False	False	9.0	11.0								4	3.39e-14
ENSG00000027001	MIPEP	Q99797	Q99797	13_24476230_G_T	rs76201722	0.028856617	0.001550414	1	4.44e-07	-0.557164557	1.68e-07	-0.67160195	0.020092986	-0.269763676	0.0015107629999999998	-0.353883814	True	202	22046842.29	0.122551304	28	0.101638123	False	24476230,24389667,24391098,24397177,24400535,24401328,24406196,24421992,24422760,24428190,24434951,24436475,24437812,24442089,24443124,24443988,24444557,24445237,24445928,24446461,24446810,24447228,24449309,24449669,24450202,24452804,24456358,24457390,24461345,24462340,24462514,24463132,24463867,24469034,24470833,24472715,24472982,24473381,24474724,24475407,24476409,24476586,24476587,24476956	13_24436475_C_T;	13_24462340_CTCT_C;13_24445928_TTTGC_T;13_24442089_AT_A;13_24442088_AAT_A;13_24421992_TTA_T;			13_24463132_C_G;13_24462514_A_G;13_24462340_CTCT_C;13_24461345_T_A;13_24457390_T_C;13_24456358_A_G;13_24452804_G_A;13_24450202_A_C;13_24449309_C_T;13_24447228_C_T;13_24446810_T_C;13_24446461_G_A;13_24445928_TTTGC_T;13_24445237_A_G;13_24444557_T_C;13_24443988_T_C;13_24443124_C_G;13_24442089_AT_A;13_24442088_AAT_A;13_24437812_C_G;13_24434951_G_C;13_24428190_C_A;13_24422760_A_G;13_24421992_TTA_T;13_…			0.198019802	False	True	True	True	False	False	26.0	28.0								28	2.03e-54
ENSG00000028116	VRK2	Q86Y07	Q86Y07	2_58316814_A_G	rs1051061	2.95e-05	4.73e-07	1	1.94e-11	-0.51806001	1.35e-06	-0.557587155	0.613167079	-0.186885754	0.914811548	0.008321596	False	202	6410208.011	0.150612536	15	0.085241755	False	###############################################################################################################################################################################################################################################################	2_58316814_A_G;	2_58342685_TTTGG_T;2_58342680_ATTTG_A;		2_58316814_A_G;	2_58385353_T_C;2_58380658_G_C;2_58379520_T_A;2_58373205_C_T;2_58371153_T_C;2_58362161_G_A;2_58361134_G_A;2_58354971_G_A;2_58344189_G_A;2_58342685_T_G;2_58342685_TTTGG_T;2_58342680_ATTTG_A;2_58338086_A_G;2_58335681_T_C;2_58253423_G_A;	2_58385353_T_C;2_58380658_G_C;2_58379520_T_A;2_58373205_C_T;2_58371153_T_C;2_58362161_G_A;2_58361134_G_A;2_58354971_G_A;2_58344189_G_A;2_58342685_T_G;2_58342685_TTTGG_T;2_58342680_ATTTG_A;2_58338086_A_G;2_58335681_T_C;2_58316814_A_G;		0.363861386	True	True	True	True	False	False	15.0	15.0	2_58316814	rs1051061	Schizophrenia	1.00E-10	GIANT_BMI-F-GT-50_EUR_2015;ILAE_Epilepsy-GG_Mixed_2014	0.00196808	1.32e-11	3	2.83e-06
ENSG00000028528	SNX1	Q13596	Q13596	15_64418221_C_G	rs2290119	0.001676102	4.67e-05	1	1.15e-09	-0.417552211	0.00576291	-0.435200156	5.589999999999999e-09	-0.393658767	2.32e-14	-0.603710428	True	202	17978225.57	0.11349884	21	0.121143839	True	64418221,64351745,64352932,64353201,64357712,64358722,64360155,64361441,64364370,64365340,64366293,64369998,64370822,64371615,64373822,64374034,64375216,64379705,64379865,64381148,64382738,64383215,64383362,64383458,64384172,64389087,64389434,64391096,64391667,64394580,64398539,64399944,64411521,64416621,64427426,64427587,64430607,64434537,64436455,64439532,64440424,64441036,64508763,64524980		15_64434536_AG_A;15_64394580_TC_T;		15_64434537_G_A;15_64434536_AG_A;15_64430607_T_C;	15_64436455_C_A;15_64434537_G_A;15_64434536_AG_A;15_64430607_T_C;15_64427587_C_G;15_64427426_C_T;15_64416621_G_A;15_64411521_A_G;15_64399944_G_A;15_64398539_A_C;15_64394580_TC_T;15_64391667_A_G;15_64391096_T_C;15_64389434_G_A;15_64389087_T_G;15_64418221_C_G;	15_64434537_G_A;15_64434536_AG_A;15_64430607_T_C;15_64427587_C_G;15_64427426_C_T;15_64416621_G_A;15_64411521_A_G;15_64399944_G_A;15_64398539_A_C;15_64394580_TC_T;15_64391667_A_G;15_64391096_T_C;15_64389434_G_A;15_64389087_T_G;15_64418221_C_G;		0.29207920800000003	True	True	False	True	False	False	20.0	21.0								7	3.68e-13
ENSG00000029534	ANK1	P16157-3	P16157-3	8_41614567_G_A	rs7831530	0.05079271900000002	0.00305006	1	2.55e-06	-0.470095093	5.04e-10	-0.919818905	3.13e-14	-0.724072446	1.0399999999999999e-18	-0.7780944409999999	True	202	2511513.503	0.238971488	15	0.222358339	False	416,145,674,160,962,000,000,000,000,000,000,000,000,000,000,000					8_41613496_T_C;8_41612255_C_T;8_41610643_C_T;8_41609843_G_A;8_41609623_C_T;8_41614567_G_A;			0.373762376	False	False	False	True	False	False	15.0	15.0								5	4.79e-07
ENSG00000029639	TFB1M	Q8WVM0	Q8WVM0	6_155635624_A_G		5.13e-07	4.98e-09	1	7.559999999999999e-13	-0.71106429	2.06e-11	-0.8154714259999999	2.02e-33	-1.052268244	2.6899999999999995e-35	-0.964467661	True	202	9928235.502	0.152573859	15	0.128592485	False	155,635,624,155,625,000,000,000,000,000,000,000,000,000,000,000,000,000,000,000,000,000,000,000		6_155635281_G_GTC;		6_155635585_A_C;	6_155635281_G_GTC;6_155625104_A_G;			0.396039604	True	True	False	True	False	False	15.0	15.0								12	5.91e-22
ENSG00000033100	CHPF2	Q9P2E5	Q9P2E5	7_150948000_T_C	rs4726010	0.003366502	0.000105216	1	4.17e-07	-0.497742095	0.001381453	-0.480695961	0.001354773	-0.188228968	2.43e-05	-0.248804141	True	194	991172.3003	0.265521687	5	0.41658567	False	150,948,000,150,948,000,000,000,000,000,000,000,000,000,000,000,000,000,000,000,000,000,000,000								0.482673267	False	False	False	False	False	False	4.0	5.0	7_150951819;7_150954184	rs3789823;rs2530459	Heel bone mineral density;Heel bone mineral density					5	1.67e-07
ENSG00000033178	UBA6	A0AVT1	A0AVT1	4_68483534_G_A	rs7678366	0.004570723	0.000159438	1	5.92e-08	0.395571246	7.290000000000001e-05	0.586508723	0.001237782	0.238316642	1.47e-05	0.261627406	True	202	59769646.18	0.115334648	46	0.110679645	False	68483534,68479934,68481557,68481784,68481813,68482401,68482405,68483472,68483803,68489007,68490122,68493076,68494236,68497389,68497597,68500171,68500798,68502665,68502901,68504232,68504380,68506040,68506130,68507381,68507383,68510597,68512252,68512837,68513124,68515054,68516722,68517721,68520178,68520419,68520649,68521207,68525122,68525356,68526784,68528284,68528460,68530712,68534392,68535664,685…	4_68534392_C_T;	4_68562130_CAT_C;4_68556488_T_TAAAAC;4_68550147_CT_C;4_68535664_TA_T;4_68520649_CAA_C;4_68520419_GTAAATGGGCTAAATACCCCAAT_G;4_68517721_G_GCT;4_68510597_GA_G;4_68510496_CCTATGGAGGAGAAAAATGGTATATATCAGATTAAAATAACCTATCTGTGAATCATTTTACTTTGAAATATTTAACAGGTTTATTTTACCACTGTTTCAACGAAAAAAAAAAGTATAAACCAAATAAGGAAAAGCATAATTGTACAATTTCTTTAAACAGAAGACATTTAAAAATTCCAAATAAAATTTAAACATTGAACTGCTTATGTAAGATAGAAATAAACACAATATA…	4_68534392_C_T;4_68510496_CCTATGGAGGAGAAAAATGGTATATATCAGATTAAAATAACCTATCTGTGAATCATTTTACTTTGAAATATTTAACAGGTTTATTTTACCACTGTTTCAACGAAAAAAAAAAGTATAAACCAAATAAGGAAAAGCATAATTGTACAATTTCTTTAAACAGAAGACATTTAAAAATTCCAAATAAAATTTAAACATTGAACTGCTTATGTAAGATAGAAATAAACACAATATAATGTTAATACAACATTTAAAAAAAAGATTCCTCCCTTTTGGACATTTCTCAAAACTCATTTACTGAATAAAACTATTCTAAGACTTCTACTATTATCTAAAATTGATAATACTAGATTCCATATGCATGTAAAAAGCTCAG…	4_68483803_GAAA_G;4_68483472_A_G;4_68482405_G_C;4_68482401_T_C;4_68481813_T_C;4_68481784_T_G;4_68481557_CAAAG_C;4_68479934_C_T;4_68483534_G_A;	4_68566689_G_A;4_68562921_C_A;4_68562130_CAT_C;4_68558839_C_T;4_68556488_T_TAAAAC;4_68555508_T_C;4_68554442_A_T;4_68553737_G_C;4_68552448_T_C;4_68550271_C_T;4_68550147_CT_C;4_68549215_C_T;4_68548847_G_T;4_68548474_A_G;4_68548452_G_T;4_68548222_A_T;4_68546533_C_T;4_68544837_C_T;4_68540692_A_G;4_68539785_C_G;4_68537817_C_T;4_68535664_TA_T;4_68530712_G_A;4_68528460_C_T;4_68528284_C_T;4_68526784_C_G;…	4_68490122_G_A;	4_68500171_A_G;4_68497597_C_A;	0.141089109	True	True	True	True	True	True	41.0	46.0								6	7.22e-15
ENSG00000033867	SLC4A7	Q9Y6M7-13	Q9Y6M7-13	3_27324024_A_C		3.71e-05	6.29e-07	1	9.08e-09	-0.494431666	0.000166081	-0.404855347	0.00026359	-0.228618861	8.22e-05	-0.208909086	True	202	19215723.13	0.164655522	23	0.120270494	False	27324024,27225449,27227374,27227556,27227579,27228010,27228354,27228890,27228951,27231719,27232053,27232227,27232737,27232950,27233376,27233498,27234968,27235645,27235816,27235940,27236734,27237080,27237390,27237435,27237570,27237655,27268024,27270922,27272007,27272078,27273564,27274044,27275457,27277043,27277084,27278214,27279423,27279610,27281689,27281769,27281942,27283117,27283584,27284083,272…								0.363861386	False	False	False	False	False	False	18.0	23.0								1	7.280000000000001e-10
ENSG00000035115	SH3YL1	Q96HL8	Q96HL8	2_217334_G_C	rs6709534	0.005846194	0.000216931	1	1.04e-07	-0.6727672440000001	1.28e-07	-1.04909881	2.2300000000000003e-27	-0.999177156	1.85e-23	-0.913618467	True	127	619521.8227	0.392182119	1	0.215131027	False	217334,211317,212548,214837,217560,218386,220889,221560,221981,222336,224919,226933,227066,227201,228088,229456,230912,231741,234668,237346,239597,239969,242132,242426,243929,249092,254215,256116,258210,262335,264019,264227,264621,267367,268191,268293,269679,271797,272203,274672,277003,280819,281178,282137,285421,285471,286756		2_237346_GGTGACACTACCA_G;2_234668_A_AAC;	2_224919_A_G;	2_264019_C_A;2_242132_G_A;2_239969_C_T;2_239597_C_G;2_230912_A_C;2_218386_G_A;	2_264621_A_C;2_264227_G_A;2_264019_C_A;2_262335_A_G;2_258210_T_C;2_256116_G_T;2_254215_G_A;2_249092_A_C;2_243929_G_A;2_242426_A_G;2_242132_G_A;2_239969_C_T;2_239597_C_G;2_237346_GGTGACACTACCA_G;2_234668_A_AAC;2_231741_C_T;2_230912_A_C;2_229456_A_G;2_228088_G_A;2_227201_C_T;2_227066_G_A;2_226933_A_G;2_224919_A_G;2_222336_T_C;2_221981_C_T;2_221560_G_A;2_220889_G_A;	2_258210_T_C;2_256116_G_T;2_254215_G_A;2_249092_A_C;2_243929_G_A;2_242426_A_G;2_242132_G_A;2_239969_C_T;2_239597_C_G;2_237346_GGTGACACTACCA_G;2_234668_A_AAC;2_231741_C_T;2_230912_A_C;2_229456_A_G;2_228088_G_A;2_227201_C_T;2_227066_G_A;2_226933_A_G;2_224919_A_G;2_222336_T_C;2_221981_C_T;2_221560_G_A;2_220889_G_A;	2_224919_A_G;	0.366336634	True	True	False	True	True	True	1.0	1.0	2_224919;2_239597;2_267367;2_277003;2_286756	rs2290911;rs6710091;rs58461606;rs79716074;rs60843830	Height;HDL cholesterol;Blood protein levels;Blood protein levels;Spherical equivalent (joint analysis main effects and education interaction)					26	9.529999999999988e-116
ENSG00000035499	DEPDC1B	Q8WUY9	Q8WUY9	5_59805730_C_T	rs114487734	0.00847788	0.00034137800000000004	1	5.429999999999999e-07	-0.997541723	0.000410499	-1.127720199	9.59e-24	-0.77409626	2.41e-09	-0.697234935	True	202	4182158.535	0.146800178	18	0.211172333	False	59805730								0.047029703	False	False	False	False	False	False	7.0	7.0								0
ENSG00000037474	NSUN2	Q08J23	Q08J23	5_6600793_T_C	rs3776446	0.0035417720000000008	5.720000000000002e-05	2	1.29e-07	0.401650318	0.000323522	0.445353316	4.51e-38	0.340726601	4.89e-08	0.249266218	True	202	68201102.81	0.079917395	43	0.060961302	False	6600793,6600492,6600864,6601055,6602544,6604533,6604931,6604970,6605271,6605532,6605970,6606019,6606303,6606323,6607125,6607916,6608150,6608534,6608957,6609139,6610237,6610249,6610263,6610391,6610786,6611757,6611983,6612243,6612464,6613146,6613418,6613827,6614653,6614655,6614764,6614963,6614969,6615060,6615092,6615728,6616532,6617011,6618186,6618323,6618703,6619733,6620459,6621031,6621210,6626561…		5_6615728_GC_G;5_6611753_TCACA_T;5_6607125_GAAC_G;5_6605970_AT_A;5_6604533_AC_A;5_6600492_G_GT;			5_6626673_C_G;5_6626561_T_C;5_6621210_A_G;5_6621031_A_G;5_6620459_A_G;5_6619733_C_T;5_6618703_T_C;5_6618323_G_C;5_6618186_T_C;5_6617011_C_A;5_6616532_T_C;5_6615728_GC_G;5_6615092_A_C;5_6615060_A_C;5_6614969_A_G;5_6614963_G_A;5_6614764_C_T;5_6614655_T_C;5_6614653_G_C;5_6613827_T_C;5_6613418_G_A;5_6613146_A_G;5_6612464_A_G;5_6612243_A_G;5_6611983_C_A;5_6611757_A_T;5_6611753_TCACA_T;5_6610786_G_T;5_…	5_6626673_C_G;5_6626561_T_C;5_6621210_A_G;5_6621031_A_G;5_6620459_A_G;5_6619733_C_T;5_6618703_T_C;5_6618323_G_C;5_6618186_T_C;5_6617011_C_A;5_6616532_T_C;5_6615728_GC_G;5_6615092_A_C;5_6615060_A_C;5_6614969_A_G;5_6614963_G_A;5_6614764_C_T;5_6614655_T_C;5_6614653_G_C;5_6613827_T_C;5_6613418_G_A;5_6613146_A_G;5_6612464_A_G;5_6612243_A_G;5_6611983_C_A;5_6611757_A_T;5_6611753_TCACA_T;5_6610786_G_T;5_…		0.346534653	False	True	False	True	False	False	38.0	42.0	5_6610391	rs7717596	Heel bone mineral density					48	3.8299999999999957e-85
ENSG00000037757	MRI1	Q9BV20	Q9BV20	19_13870153_C_A	rs371671	7.92e-06	1.1e-07	1	1.99e-12	-0.672145642	1.11e-10	-0.932020714	1.66e-21	-0.825156303	3.93e-23	-0.843010558	True	202	8549194.656	0.248604987	14	0.21186087	False	138,701,531,386,925,000,000,000,000,000,000,000,000,000,000,000,000,000,000,000,000,000,000,000,000,000,000,000,000,000,000,000,000,000,000,000,000,000,000,000,000,000,000,000,000,000,000,000					19_13875626_T_C;			0.482673267	False	False	False	True	False	False	14.0	14.0								46	2.8299999999999974e-74
ENSG00000040275	SPDL1	Q96EA4	Q96EA4	5_169055183_T_C	rs264860	0.000383908	8.85e-06	1	2.88e-10	0.529924984	3.88e-08	0.618146855	1.02e-14	0.114259969	0.057192726	-0.10482964	True	202	6431516.333	0.146926206	14	0.11077017	False	169055183								0.28960396	False	False	False	False	False	False	14.0	14.0								16	2.8399999999999987e-43
ENSG00000042088	TDP1	Q9NUW8	Q9NUW8	14_90408339_T_C	rs4904629	1.57e-06	1.74e-08	1	2.05e-14	-0.668100613	3.04e-09	-0.5698590729999999	2.35e-16	-0.628159338	2.36e-23	-0.6708254770000001	True	202	10642862.99	0.118613882	23	0.147616926	True	904,083,399,039,657,000,000,000					14_90422664_T_C;	14_90422664_T_C;		0.455445545	False	False	False	True	False	False	23.0	23.0								6	3.36e-15
ENSG00000042493	CAPG	P40121	P40121	2_85640673_A_T	rs146505632	0.047024227	0.002752208	1	1.35e-05	-0.551157958	0.0006138869999999999	-0.5352767270000001	0.5124643520000001	-0.353801396	0.050614822	-0.225498156	False	202	21876950.96	0.234443721	12	0.151552512	False	85640673,85606846,85607682,85608965,85609353,85610056,85610154,85612493,85613532,85623377,85624554,85629330,85630443,85634190,85635004,85636384,85638157,85640460,85642705,85643457,85643718,85643894,85645101,85645950,85646084,85646988,85649592,85650277,85650774,85651047,85652214,85655226,85656661,85659851		2_85643718_T_TC;			2_85645101_T_C;2_85643894_C_T;2_85643718_T_TC;2_85643718_T_A;2_85643457_G_A;2_85642705_G_A;2_85640460_T_C;2_85638157_T_A;2_85636384_A_G;2_85635004_C_A;2_85634190_T_C;2_85630443_G_A;2_85629330_C_A;2_85624554_C_T;2_85623377_C_T;2_85640673_A_T;			0.076732673	False	True	False	True	False	False	10.0	12.0								1	3.79e-05
ENSG00000047188	YTHDC2	Q9H6S0	Q9H6S0	5_112885560_C_T	rs6594735	6.11e-06	8.23e-08	1	6.92e-12	-0.730733097	1.19e-05	-0.641318384	1.55e-15	-0.624169149	2.16e-18	-0.822112162	True	202	20192323.53	0.109733746	47	0.119667159	False	112,885,560,112,852,000,000,000,000,000,000,000					5_112899250_G_A;5_112852568_G_A;5_112885560_C_T;	5_112852568_G_A;5_112885560_C_T;		0.267326733	False	False	False	True	False	False	43.0	47.0								18	1.99e-15
ENSG00000049449	RCN1	Q15293	Q15293	11_32112568_A_C	rs223046	0.023419712	0.001178799	1	2.44e-07	-0.511741781	0.00143258	-0.36093402	6.18e-05	-0.505128609	4.01e-06	-0.518637016	True	202	65716219.3	0.131112119	17	0.20710914	False	32,112,568,320,969,400,000,000,000,000,000,000,000,000,000,000,000,000,000,000,000,000,000,000,000,000,000				11_32112568_A_C;				0.31683168300000003	True	False	False	False	False	False	15.0	17.0	11_32101281	rs477838	Blood protein levels	3.00E-06				21	5.6899999999999996e-39
ENSG00000051128	HOMER3	Q9NSC5-2	Q9NSC5-2	19_19050957_A_G	rs1122821	0.077043852	0.005383961	1	7.54e-05	-0.392335953	0.000299585	-0.5164955370000001	4.79e-13	-0.691865614	2.54e-14	-0.703310779	True	202	4287269.649	0.23433537	10	0.561319438	False	19050957				19_19050957_A_G;	19_19050957_A_G;			0.371287129	True	False	False	True	False	False	10.0	10.0								3	3.3899999999999963e-134
ENSG00000053770	AP5M1	E7EQ45	E7EQ45	14_57598022_G_A	rs4898927	0.023053096	0.00115225	1	4.64e-06	-0.4348471370000001	0.003764991	-0.52507833	1.274546009	-0.141202314	0.467873803	-0.029886408	False	176	1565984.671	0.169412087	6	0.225190413	False	57,598,022,575,962,600,000,000,000,000,000,000,000,000,000,000,000,000,000								0.393564356	False	False	False	False	False	False	5.0	5.0								0
ENSG00000054983	GALC	P54803	P54803	14_88410227_G_C	rs4445832	3.56e-06	4.33e-08	1	1.79e-14	0.635726298	8.809999999999999e-09	0.599341714	1.737308039	0.154713087	0.6310505470000001	-0.029392028	False	202	3940254.359	0.259168723	11	0.258337428	False	88410227,88391116,88391333,88391765,88401904,88404382,88404706,88405899,88410434,88410811,88412509,88414875,88416017,88419003,88419374,88424275,88426007,88427075,88429033,88429304,88430294,88431898,88432942,88434134,88439723,88443665,88444882,88445416,88446687,88449847,88451251,88453186,88453278,88453833,88454691,88455786,88461649,88463019,88464880,88467755,88470049,88479054,88479226,88482577,884…		14_88439723_TTATATA_T;		14_88431898_C_T;	14_88455786_C_G;14_88454691_C_T;14_88453833_T_C;14_88453278_T_G;14_88453186_A_G;14_88451251_A_G;14_88449847_G_C;14_88446687_T_C;14_88445416_G_A;14_88444882_A_C;14_88443665_A_G;14_88439723_TTATATA_T;14_88434134_C_T;14_88432942_A_G;14_88430294_G_A;14_88429304_C_T;14_88429033_T_C;14_88427075_A_G;14_88426007_T_C;14_88424275_T_A;14_88419374_T_C;14_88419003_A_T;14_88416017_G_A;14_88414875_C_T;14_884125…	14_88455786_C_G;14_88454691_C_T;14_88453833_T_C;14_88453278_T_G;14_88453186_A_G;14_88451251_A_G;14_88449847_G_C;14_88446687_T_C;14_88445416_G_A;14_88444882_A_C;14_88443665_A_G;14_88439723_TTATATA_T;14_88434134_C_T;14_88432942_A_G;14_88431898_C_T;14_88430294_G_A;14_88429304_C_T;14_88429033_T_C;14_88427075_A_G;14_88426007_T_C;14_88424275_T_A;14_88419374_T_C;14_88419003_A_T;14_88416017_G_A;14_884148…	14_88431898_C_T;	0.381188119	True	True	False	True	False	True	11.0	11.0								12	1.38e-24
ENSG00000056050	C4orf27	Q9NWY4	Q9NWY4	4_170678993_T_C	rs11540095	6.5e-07	6.54e-09	1	1.25e-12	-0.8691980640000001	9.55e-10	-0.7756160059999999	7.67e-26	-1.158234242	3.73e-30	-1.240591951	True	202	20428546.78	0.149461431	17	0.11312564	False	170678993							4_170678993_T_C;	0.163366337	False	False	False	False	False	True	17.0	17.0								9	2.62e-34
ENSG00000061987	MON2	Q7Z3U7-5	Q7Z3U7-5	12_62932777_G_A	rs10877872	0.0006604110000000001	1.6e-05	1	4.36e-09	0.452081269	0.00392261	0.460975573	0.23610034	0.155763565	5.579999999999999e-09	0.267121855	True	202	9774596.658	0.099687219	37	0.109453384	False	62,932,777,628,478,000,000,000,000,000,000,000,000,000,000,000,000,000,000,000,000,000,000,000,000,000,000,000,000,000,000,000,000,000,000					12_62934442_G_A;12_62930004_A_T;12_62907202_C_T;12_62868098_A_T;12_62932777_G_A;	12_62934442_G_A;12_62930004_A_T;12_62907202_C_T;12_62868098_A_T;12_62932777_G_A;		0.5	False	False	False	True	False	False	30.0	37.0								0
ENSG00000063854	HAGH	Q16775	Q16775	16_1927883_C_T	rs79534635	0.022513451	0.001120007	1	3.18e-06	-0.435239826	0.0008579169999999999	-0.7024587809999999	0.001151979	-0.472155004	0.00026399400000000003	-0.376824134	True	202	5309281.084	0.167475647	9	0.12163887	False	192,788,319,266,421,000,000,000,000,000,000,000,000,000								0.126237624	False	False	False	False	False	False	9.0	9.0								3	4.03e-12
ENSG00000064042	LIMCH1	Q9UPQ0-10	Q9UPQ0-10	4_41363521_G_A	rs115995457	0.077673962	0.002744521	2	1.92e-06	1.3032959709999998	3.97e-09	1.66054828					False	99	1596963.375	0.973880771	1	0.53712871	False	41,363,521,413,529,800,000,000,000,000,000,000,000,000,000,000,000,000,000					4_41365301_G_C;4_41365130_A_G;4_41363521_G_A;			0.047029703	False	False	False	True	False	False	1.0	1.0								0
ENSG00000064666	CNN2	B4DUT8	B4DUT8	19_1031438_C_T	rs67538026	0.044571784	0.002571936	1	2.29e-07	-0.298706556	3.77e-05	-0.300617577	6.91e-12	-0.594892114	1.05e-05	-0.30524723600000003	True	202	92299290.95	0.15064344300000002	12	0.12685070699999998	False	10,314,381,031,550					19_1031550_C_T;19_1031438_C_T;	19_1031550_C_T;19_1031438_C_T;		0.482673267	False	False	False	True	False	False	10.0	12.0	19_1031438	rs67538026	Advanced age-related macular degeneration					0
ENSG00000065268	WDR18	U3KQC1	U3KQC1	19_984218_C_T	rs8112598	0.0147413	0.00065398	1	8.48e-06	-0.4927852	0.018643414	-0.369364434	1.64e-12	-0.710470505	2.43e-16	-0.7258801290000001	True	202	27014383.91	0.160645917	14	0.207231924	False	984,218,984,987,985,000,000,000,000,000,000,000,000,000,000,000,000,000,000,000,000,000,000,000,000,000					19_990185_G_C;19_988668_T_C;19_988096_C_T;19_987571_C_G;19_987533_T_C;19_987365_A_G;19_987051_A_G;19_986825_T_C;19_986624_A_G;19_985997_C_G;19_985251_T_C;19_984987_T_C;19_984218_C_T;	19_990185_G_C;19_988668_T_C;19_988096_C_T;19_987571_C_G;19_987533_T_C;19_987365_A_G;19_987051_A_G;19_986825_T_C;19_986624_A_G;19_985997_C_G;19_985251_T_C;19_984987_T_C;		0.29950495	False	False	False	True	False	False	13.0	14.0								12	8.47e-29
ENSG00000065534	MYLK	Q15746-6	Q15746-6	3_123543783_C_T	rs3851983	0.000350524	3.94e-06	2	5.05e-10	0.62380582	0.000207232	0.8205067559999999	5.48e-20	0.671107399	4.3999999999999996e-26	0.8765335	True	202	6189749.334	0.129932278	27	0.184888074	True	123543783,123556171,123559835,123561003,123568102,123568826,123571754,123584488,123594419,123599681,123600144,123604942,123605216,123606952,123607884,123610343,123610607,123620718,123624252,123624772,123625634,123626813,123635213,123645893,123650432,123652895,123653909,123654633,123664105,123665902,123666192,123670721,123672787,123674337,123676696,123678162					3_123600144_A_G;3_123599681_C_T;3_123594419_T_G;3_123584488_A_G;3_123571754_G_A;3_123568826_C_T;3_123568102_T_C;3_123561003_C_T;3_123559835_T_G;3_123556171_C_A;3_123543783_C_T;	3_123600144_A_G;3_123599681_C_T;3_123594419_T_G;3_123584488_A_G;3_123571754_G_A;3_123568826_C_T;3_123568102_T_C;3_123561003_C_T;3_123559835_T_G;3_123556171_C_A;3_123543783_C_T;		0.309405941	False	False	False	True	False	False	25.0	27.0	3_123556171;3_123571754;3_123594419;3_123653909;3_123674337	rs35919256;rs1343700;rs34067381;rs13089785;rs13062100	Educational attainment (MTAG);General cognitive ability;Educational attainment (years of education);Intelligence (MTAG);General cognitive ability					0
ENSG00000065615	CYB5R4	Q7L1T6	Q7L1T6	6_84325442_C_T		0.044138899	0.00253167	1	1.26e-05	0.878350922	0.001882853	0.767507334	0.092921697	-0.023694444	0.157485284	-0.213000738	False	202	2533592.731	0.287918333	10	0.283728876	False	84325442								0.064356436	False	False	False	False	False	False	5.0	6.0								0
ENSG00000065675	PRKCQ	A0A087X0I9	A0A087X0I9	10_6674774_G_A		2.65e-09	6e-12	2	6.28e-18	0.821850192	1.3800000000000005e-11	0.917442157	2.59e-24	0.918640548	1.6899999999999998e-26	0.929335617	True	202	3060195.657	0.26862534	16	0.181215712	False	6674774								0.29207920800000003	False	False	False	False	False	False	16.0	16.0								0
ENSG00000065833	ME1	P48163	P48163	6_84174401_A_G		0.095814532	0.007234036	1	9.17e-06	0.307713635	1.7899999999999998e-05	0.881730135	0.011831798	0.216751561	0.048634559	0.113374812	False	202	7356337.669	0.22165828	23	0.132813088	False	84174401,84019824,84019825,84021294,84021751,84022658,84023090,84023171,84023484,84025802,84026572,84029716,84029793,84030422,84030692,84031251,84033229,84034415,84034748,84034779,84034832,84036345,84037106,84037174,84037328,84037515,84038253,84038522,84038605,84038677,84038920,84039558,84039566,84040440,84041599,84042326,84050283,84050814,84050941,84051050,84051180,84051460,84051824,84052966,840…		6_84140772_TGGC_T;6_84139426_ATCAC_A;6_84139425_AATCAC_A;6_84133815_CA_C;6_84133815_CAA_C;6_84133814_TC_T;6_84122391_CA_C;6_84121293_AT_A;6_84113985_GT_G;6_84103316_CCT_C;6_84100600_CATAT_C;6_84087568_TA_T;6_84066467_GT_G;6_84062093_TA_T;6_84059171_AAT_A;6_84051180_TCTTGAAGAGTACGTATAC_T;6_84033229_CA_C;6_84023484_T_TAAAC;		6_84140772_TGGC_T;	6_84139426_ATCAC_A;6_84139425_AATCAC_A;6_84139030_G_T;6_84138843_A_G;6_84138485_C_A;6_84137756_G_T;6_84137722_C_T;6_84137202_T_C;6_84136605_T_C;6_84136112_C_A;6_84135539_C_T;6_84135023_G_C;6_84134464_C_T;6_84133815_CA_C;6_84133815_CAA_C;6_84133814_TC_T;6_84133338_T_C;6_84132963_A_C;6_84131874_T_C;6_84131300_T_A;6_84130734_C_G;6_84130396_C_G;6_84127626_T_C;6_84127224_T_C;6_84126824_G_A;6_84126420_…			0.329207921	True	True	False	True	False	False	22.0	23.0	6_84173028	rs12195417	Schizophrenia					3	5.54e-11
ENSG00000066084	DIP2B	Q9P265	Q9P265	12_51138862_C_T	rs1047912	3.9e-09	2.01e-11	1	1.0599999999999999e-15	0.658986117	5.58e-10	0.6920437070000001	4.6899999999999985e-34	1.229339906	6.990000000000001e-17	0.44963429	True	202	11555226.62	0.146611371	37	0.122082134	False	51,138,862,508,935,100,000,000,000,000,000,000,000,000,000,000,000,000,000,000,000,000,000,000,000,000,000				12_51138687_A_C;12_51138862_C_T;	12_51128832_A_G;12_51117593_C_A;12_51074873_T_A;12_51073523_G_A;12_51064064_A_G;12_51046224_G_A;	12_51138687_A_C;12_51128832_A_G;12_51117593_C_A;12_51138862_C_T;		0.29702970300000003	True	False	False	True	False	False	33.0	37.0	12_51138862;12_51138862	rs1047912;rs1047912	Lung function (FVC);Red cell distribution width		Astle-W_baso-neut-sum_EUR_2017;Astle-W_gran_EUR_2017;Astle-W_mchc_EUR_2017;Astle-W_mcv_EUR_2017;Astle-W_myeloid-wbc_EUR_2017;Astle-W_neut-eo-sum_EUR_2017;Astle-W_pct_EUR_2017;Astle-W_plt_EUR_2017;Astle-W_rdw_EUR_2017;Astle-W_wbc_EUR_2017;GIANT_HipadjBMI_Mixed_2015;GLGC_LDL_EUR_2013;GLGC_TC_EUR_2013	0.00894622	9.92e-07	8	1.91e-18
ENSG00000066557	LRRC40	Q9H9A6	Q9H9A6	1_70651015_T_C	rs61785270	0.056171957	0.003519551	1	2.1600000000000007e-05	-0.34308779	9.81e-06	-0.443261457	0.000211891	-0.24976613	5.41e-06	-0.309904358	True	202	37596463.42	0.126014157	27	0.117980995	False	70651015,70608053,70608132,70609129,70610146,70610215,70610738,70611208,70614427,70618409,70620147,70620329,70625637,70627063,70627355,70630925,70634463,70636364,70641177,70643909,70646053,70646293,70646431,70646502,70647802,70649135,70654078,70658272,70672605,70679891,70686213,70690540,70711236		1_70610738_C_CTA;		1_70611208_A_T;1_70610738_C_CTA;	1_70658272_T_A;1_70654078_C_T;1_70649135_C_T;1_70647802_C_T;1_70646502_C_G;1_70646431_A_C;1_70646293_T_C;1_70646053_A_G;1_70643909_C_T;1_70641177_T_A;1_70636364_C_T;1_70634463_C_T;1_70630925_G_C;1_70627355_C_T;1_70627063_A_G;1_70625637_A_G;1_70620329_T_G;1_70620147_T_C;1_70618409_C_T;1_70614427_T_C;1_70651015_T_C;			0.185643564	True	True	False	True	False	False	25.0	27.0								1	4.46e-05
ENSG00000066654	THUMPD1	Q9NXG2	Q9NXG2	16_20794983_A_G	rs12932513	3.17e-05	5.16e-07	1	3.1399999999999995e-10	0.6404893110000001	0.007075527	0.907086965	2.19e-05	0.649428697	1.83e-20	0.848305084	True	202	26196969.88	0.133715211	19	0.115326917	False	20794983,20694067,20694194,20697868,20698300,20700016,20700317,20703074,20705241,20706955,20712538,20712837,20714033,20715718,20718939,20719627,20725086,20726035,20727364,20728166,20729699,20731013,20732321,20733134,20740257,20740517,20742185,20743399,20744154,20745431,20746239,20747104,20748331,20755650,20755662,20756911,20757590,20758397,20758433,20759548,20760423,20761804,20765744,20771530,207…	16_20748331_C_A;	16_20745431_CAAATA_C;16_20745431_CAAATAA_C;		16_20747104_C_T;16_20746239_G_C;16_20745431_CAAATA_C;16_20745431_CAAATAA_C;				0.123762376	True	True	True	False	False	False	16.0	19.0								2	7.49e-29
ENSG00000066777	ARFGEF1	Q9Y6D6	Q9Y6D6	8_68122084_T_G	rs72654952	0.058611134	0.003727733	1	2.45e-05	-0.6370445539999999	0.000437342	-0.914062327	0.015156458	-0.215021698	0.001422168	-0.294444233	True	202	50058229.57	0.122563165	70	0.083427346	False	681,220,846,776,112,000,000,000					8_68122084_T_G;			0.051980198	False	False	False	True	False	False	46.0	56.0								0
ENSG00000068878	PSME4	Q14997	Q14997	2_54236303_A_T		0.003536079	0.000113463	1	3.03e-08	0.349622369	7.759999999999999e-05	0.491683686	3.09e-09	0.233116138	6.040000000000001e-16	0.453484821	True	202	25915587.09	0.144705374	57	0.167301338	False	542,363,035,423,422,000,000,000,000,000,000,000,000,000,000,000								0.287128713	False	False	False	False	False	False	48.0	57.0								1	1.06e-09
ENSG00000069482	GAL	P22466	P22466	11_68450203_C_T	rs948854	0.052374885	0.003187983	1	4.3e-05	0.436663222	0.041534004	0.353875823	1.86e-10	0.456585985	3.04e-10	0.42322478	True	141	253777.9485	0.558721322	2	0.455428706	False	68,450,203,684,349,000,000,000,000,000,000,000,000,000,000,000,000,000,000,000,000,000,000,000,000,000,000,000,000,000,000,000,000,000,000				11_68452128_C_T;	11_68454682_C_T;			0.319306931	True	False	False	True	False	False	2.0	2.0								1	2.67e-06
ENSG00000069998	CECR5	Q9BXW7-2	Q9BXW7-2	22_17630486_C_A	rs1034859	0.019234381	0.000916352	1	1.15e-06	-0.455365015	2.3e-06	-0.541386165	2.48e-18	-0.440384213	0.000478682	-0.283742638	True	202	16653801.17	0.1706125	20	0.155814764	False	1,763,048,617,629,540					22_17629544_G_A;22_17630486_C_A;		22_17630486_C_A;	0.425742574	False	False	False	True	False	True	17.0	20.0								7	8.34e-18
ENSG00000070718	AP3M2	P53677	P53677	8_42043493_G_A	rs2719420	0.047024227	0.000916561	3	5.05e-06	0.460802406	0.000188602	0.559923465	1.2900000000000002e-11	0.567801534	3.2100000000000005e-24	0.7628663459999999	True	202	3404723.932	0.148473563	10	0.145113991	True	42043493,41998778,41999792,42001215,42001906,42002818,42002959,42003224,42006501,42006818,42008186,42008456,42008489,42010466,42010602,42011339,42013778,42015152,42016405,42019613,42024453,42026393,42026987,42028077,42029712,42031886,42032131,42044406,42044541,42044954,42046212,42047467,42049368		8_42015152_C_CAT;		8_42028077_G_A;8_42026987_C_T;8_42011339_A_G;8_42010602_G_A;8_42010466_A_G;	8_42028077_G_A;8_42026987_C_T;8_42026393_T_C;8_42024453_G_A;8_42019613_G_A;8_42016405_A_G;8_42015152_C_CAT;8_42015152_C_T;8_42013778_T_C;8_42011339_A_G;	8_42028077_G_A;8_42026987_C_T;8_42026393_T_C;8_42024453_G_A;8_42019613_G_A;8_42016405_A_G;8_42015152_C_CAT;8_42015152_C_T;8_42013778_T_C;8_42011339_A_G;8_42010602_G_A;		0.403465347	True	True	False	True	False	False	9.0	10.0								32	5.899999999999996e-55
ENSG00000072818	ACAP1	Q15027	Q15027	17_7234299_C_G	rs3809823	0.00683174	0.000262298	1	4.95e-07	-0.462984436	0.000338007	-0.687597965	1.91e-18	-0.735519383	7.86e-20	-0.723898192	True	202	1578858.78	0.255171867	11	0.31260633	True	723,429,972,269,577,000,000,000,000,000,000,000,000,000					17_7240391_C_T;			0.25990099	False	False	False	True	False	False	11.0	11.0	17_7226957;17_7234112;17_7234112;17_7240391;17_7240391	rs35776863;rs3809822;rs3809822;rs61759532;rs61759532	Autoimmune traits;Granulocyte percentage of myeloid white cells;Monocyte percentage of white cells;Hypothyroidism;White blood cell count					2	3.51e-18
ENSG00000073969	NSF	I3L0N3	I3L0N3	17_44764775_A_C	rs199460	0.022111939	0.000544839	2	3.34e-07	0.537754173	0.050151199999999986	0.302327466	4.17e-10	0.490721739	1.65e-10	0.540862262	True	202	41687276.07	0.086947809	36	0.118902857	False	44764775					17_44764775_A_C;			0.227722772	False	False	False	True	False	False	31.0	37.0	17_44764775	rs199460	General cognitive ability		Phelan-M_HGSOC_EUR_2017;Phelan-M_Invasive-ovarian-cancer_EUR_2017;Phelan-M_Serous-Invasive-Ovarian-Cancer_EUR_2017	3.89e-07	0.0	0
ENSG00000074370	ATP2A3	Q93084-4	Q93084-4	17_3884665_G_T	rs9893669	0.005870903	0.000219223	1	6.31e-08	-0.609016943	0.001702637	-0.667382873	0.008639386	-0.34781529	6.59e-05	-0.304263483	True	202	1912243.726	0.250078006	7	0.229804908	False	388,466,538,723,993,000,000,000,000,000,000,000,000,000,000,000,000,000,000,000,000								0.153465347	False	False	False	False	False	False	6.0	7.0								0
ENSG00000075234	TTC38	Q5R3I4	Q5R3I4	22_46702554_T_G	rs56050401	0.061142708	0.003974996	1	2.36e-05	0.731504157	4.35e-06	0.962448332	0.005592215	0.4117012820000001	0.008553202	0.385162554	True	202	5782519.9870000025	0.221856943	14	0.243044233	False	467,025,544,670,350,000,000,000,000,000,000,000,000,000,000,000,000,000,000,000,000,000,000,000								0.066831683	False	False	False	False	False	False	9.0	9.0								30	4.68e-21
ENSG00000075239	ACAT1	P24752	P24752	11_108164646_A_G		0.027530877	0.001446958	1	2.78e-06	-0.456444117	0.000384983	-0.400448322	9.58e-11	-0.4589217270000001	6.75e-09	-0.419981181	True	202	41652028.31	0.126510911	19	0.095927699	False	108164646								0.455445545	False	False	False	False	False	False	18.0	19.0								0
ENSG00000075336	TIMM21	Q9BVV7	Q9BVV7	18_71930203_G_A	rs2042062	0.075192404	0.005201769	1	1.43e-06	-0.624842604	0.000429645	-0.832176721	0.423993557	-0.26416659	0.455553761	0.052409648	False	202	3884532.871	0.22808482	8	0.199756676	True	719,302,037,193,088,000,000,000,000,000,000,000,000,000,000,000,000,000,000,000,000,000,000,000								0.111386139	False	False	False	False	False	False	6.0	8.0								0
ENSG00000075711	DLG1	Q12959-4	Q12959-4	3_196795720_T_C	rs6804448	0.000244737	5.18e-06	1	3.52e-10	-0.482941326	0.00013217600000000002	-0.415544456	8.159999999999999e-05	-0.263854872	4.09e-07	-0.335437285	True	202	14505777.01	0.126826614	19	0.120736917	True	196795720,196785820,196787759,196787902,196788739,196795879,196806180,196808561,196813908,196814424,196820686,196823411,196831583,196833145,196833203,196835117,196841677,196842553,196844259,196847942,196860156,196866742,196870134,196874747,196896393,196896765		3_196847942_CAA_C;3_196831583_C_CA;3_196808561_TTGAAG_T;3_196795879_A_ACT;			3_196896765_G_C;3_196896393_T_C;3_196874747_T_A;3_196866742_T_C;3_196860156_C_T;3_196847942_CAA_C;3_196844259_G_A;3_196842553_C_T;3_196841677_C_A;3_196835117_T_C;3_196833203_G_A;3_196833145_T_C;3_196831583_C_CA;3_196831583_C_A;3_196823411_C_G;3_196820686_G_A;3_196814424_T_C;3_196813908_G_A;3_196808561_TTGAAG_T;3_196806180_T_G;3_196795879_A_ACT;3_196788739_A_G;3_196787902_T_C;3_196787759_T_C;3_196…	3_196896765_G_C;3_196896393_T_C;3_196874747_T_A;3_196866742_T_C;3_196860156_C_T;3_196847942_CAA_C;3_196844259_G_A;3_196842553_C_T;3_196841677_C_A;3_196835117_T_C;3_196833203_G_A;3_196833145_T_C;3_196831583_C_CA;3_196831583_C_A;3_196823411_C_G;3_196820686_G_A;3_196814424_T_C;3_196813908_G_A;3_196808561_TTGAAG_T;3_196806180_T_G;		0.410891089	False	True	False	True	False	False	19.0	19.0								2	5.25e-15
ENSG00000076242	MLH1	P40692	P40692	3_37053568_A_G	rs1799977	0.064032351	0.002143656	2	2.05e-05	-0.389507564	6.87e-10	-1.187588126	0.00126135	-0.423463934	0.023997152	0.13714604800000002	True	202	22552930.47	0.083323664	35	0.110598154	True	3,705,356,836,972,760,000,000,000,000,000,000,000,000,000,000,000,000,000,000,000,000,000,000,000,000,000,000,000,000	3_37053568_A_C;3_37053568_A_G;3_37053568_A_C;			3_37053568_A_C;3_37053568_A_G;3_37053568_A_C;	3_37102696_G_A;3_37068079_T_C;	3_37068079_T_C;3_37053568_A_C;3_37053568_A_G;3_37053568_A_C;		0.356435644	True	False	True	True	False	False	28.0	36.0								1	2.12e-09
ENSG00000076685	NT5C2	P49902-2	P49902-2	10_104600751_A_C		0.084503547	0.006152547	1	1.32e-05	-0.658885099	0.00365148	-0.685035394	0.010584059	-0.51032994	0.000138125	-0.553998034	True	202	9418773.659	0.210990768	15	0.124522866	False	104600751,104570096,104579256,104580517,104613423,104615643,104615644,104615647,104641579,104642520,104647200,104654356,104669442,104677690,104678350,104685108,104688115,104689236,104691837,104692505,104701872,104703954,104717669,104725471,104730737,104736855,104741203,104762924,104783829,104789494,104791837,104793992,104795834,104801087,104812861,104823674,104832857,104839230,104850621,104853290…		10_104850621_TAATA_T;			10_104952587_C_G;10_104940867_A_G;10_104917227_A_T;10_104896751_A_T;10_104892483_T_A;10_104855267_C_T;10_104853290_A_G;10_104850621_TAATA_T;	10_104952587_C_G;10_104940867_A_G;10_104917227_A_T;10_104896751_A_T;10_104892483_T_A;		0.066831683	False	True	False	True	False	False	11.0	11.0								0
ENSG00000078070	MCCC1	Q96RQ3	Q96RQ3	3_182790642_C_T	rs7624867	0.0035875570000000008	0.000116427	1	2.26e-06	0.5590464629999999	5.41e-05	0.67228187	1.85e-12	0.603362379	3.85e-12	0.6837002329999999	True	202	10003901.04	0.1547384	22	0.110279543	False	182,790,642,182,763,000,000,000,000,000,000,000,000,000,000,000,000,000,000,000,000,000,000,000,000,000,000,000,000,000,000,000,000,000,000,000,000,000,000,000,000,000,000,000,000,000,000,000,000,000,000,000,000,000		3_182805997_TG_T;3_182795415_AT_A;3_182788023_GAC_G;			3_182805998_G_T;3_182805997_TG_T;3_182804385_G_A;3_182800992_T_G;3_182797309_T_A;3_182795910_C_T;3_182795415_AT_A;3_182788023_GAC_G;3_182784407_A_G;3_182783344_C_T;3_182779943_A_G;3_182778941_G_A;3_182773125_G_C;3_182772152_T_G;3_182771828_T_C;3_182769038_T_C;3_182763580_G_A;3_182763016_C_T;3_182790642_C_T;	3_182805998_G_T;3_182805997_TG_T;3_182804385_G_A;3_182800992_T_G;3_182797309_T_A;3_182795910_C_T;3_182795415_AT_A;3_182788023_GAC_G;3_182784407_A_G;3_182783344_C_T;3_182779943_A_G;3_182778941_G_A;3_182773125_G_C;3_182772152_T_G;3_182771828_T_C;3_182769038_T_C;3_182763580_G_A;3_182763016_C_T;3_182790642_C_T;		0.277227723	False	True	False	True	False	False	21.0	22.0								21	1.04e-29
ENSG00000079819	EPB41L2	E9PHY5	E9PHY5	6_131504401_T_C		0.000105294	3.94e-07	5	8.64e-12	0.8063865040000001	6.370000000000001e-10	0.844292871	1.07e-09	0.51326293	1.05e-16	0.659104508	True	202	7867004.531	0.219082981	1	0.13586558699999998	False	131504401,131505231,131507621,131511289,131517694,131520994,131522482,131524618,131530313,131533313,131533388,131534709,131536251,131538761,131539119,131539974,131543082,131549188,131552850,131554158,131555391,131559066,131565917,131567214,131584810,131586300,131586301,131590957,131592862,131597369,131604844,131604974,131609703,131610484,131612504,131615814,131616820,131617131,131617237								0.143564356	False	False	False	False	False	False	1.0	1.0								0
ENSG00000081760	AACS	Q86V21	Q86V21	12_125564747_G_A	rs7311550	0.02818926	0.00149146	1	1.39e-06	0.461104675	0.0006645189999999999	0.408460489	4.669999999999999e-12	0.508925591	3.2200000000000003e-15	0.6125638210000001	True	202	16741739.5	0.191090568	23	0.168909205	False	###############################################################################################################################################################################################################################################################		12_125556425_CAG_C;12_125556424_ACA_A;		12_125549956_C_T;	12_125568863_C_A;12_125564363_C_T;12_125562784_C_T;12_125562131_T_C;12_125560268_C_G;12_125559502_G_A;12_125556425_CAG_C;12_125556424_ACA_A;12_125555462_G_A;12_125555313_A_C;12_125554355_A_G;12_125552380_G_T;12_125552180_C_T;12_125564747_G_A;	12_125568863_C_A;12_125564363_C_T;12_125562784_C_T;12_125562131_T_C;12_125560268_C_G;12_125559502_G_A;12_125556425_CAG_C;12_125556424_ACA_A;12_125555462_G_A;12_125555313_A_C;12_125554355_A_G;12_125552380_G_T;12_125552180_C_T;12_125564747_G_A;	12_125562784_C_T;	0.180693069	True	True	False	True	False	True	19.0	21.0	12_125540106	rs12228810	Resistant hypertension					3	1.08e-17
ENSG00000083937	CHMP2B	Q9UQN3	Q9UQN3	3_87304561_G_A	rs1060241	0.041135618	0.002330521	1	3.14e-06	0.37057732	0.000621738	0.330275009	1.39e-08	0.320311864	1.6e-11	0.427545797	True	202	14223274.71	0.125391446	5	0.137632637	True	87304561,87239206,87242859,87243683,87244101,87245445,87248587,87250585,87253957,87254027,87256572,87258133,87258681,87262727,87265821,87267240,87288437,87293542,87295512,87298488,87301263,87305607,87305758,87308553,87311893,87321530,87342944,87343463,87343501,87344327,87345445,87350420,87359637,87369511,87371474,87373695,87380025,87384701,87395141,87395464,87399721		3_87288437_CT_C;		3_87304561_G_A;	3_87301263_T_C;3_87298488_A_G;3_87295512_C_G;3_87293542_G_A;3_87288437_CT_C;			0.254950495	True	True	False	True	False	False	5.0	5.0								17	1.07e-19
ENSG00000084072	PPIE	Q9UNP9	Q9UNP9	1_40203722_T_C	rs12074147	2.21e-05	3.42e-07	1	1.31e-09	-0.417489381	1.82e-07	-0.498583933	1.36e-49	-1.121752051	0.528703345	0.035597525	True	202	10996950.88	0.126990617	14	0.16409085199999998	True	402,037,224,020,416,000,000,000,000,000,000,000,000,000,000,000,000,000,000,000,000,000,000,000,000,000,000,000,000,000,000,000,000,000,000,000,000,000,000,000,000,000,000,000,000,000,000,000,000,000,000,000,000,000,000,000		1_40205127_TAAAG_T;1_40205126_ATAAA_A;		1_40219065_C_G;	1_40226046_G_A;1_40221067_G_A;1_40220806_G_A;1_40220284_C_G;1_40219065_C_G;1_40217258_T_C;1_40216234_A_G;1_40214944_A_G;1_40214525_T_A;1_40214367_A_G;1_40213670_A_T;1_40212878_G_A;1_40211737_T_C;1_40210468_G_C;1_40206298_G_A;1_40205326_C_A;1_40205127_TAAAG_T;1_40205126_ATAAA_A;1_40204823_C_T;1_40204424_A_T;1_40204166_G_T;1_40203722_T_C;			0.358910891	True	True	False	True	False	False	12.0	14.0	1_40210468;1_40219065	rs12086750;rs1046988	Blood protein levels;Blood protein levels	5E-53;4E-25				48	3.2299999999999966e-122
ENSG00000084207	GSTP1	P09211	P09211	11_67390846_A_G	rs28782005	0.096176321	0.0072838669999999986	1	1.83e-05	0.430672713	0.000960767	0.475830259	2.34e-05	0.479161359	1.38e-06	0.414216903	True	202	308172448.0	0.187308205	15	0.26367861800000003	False	67390846,67363340,67373669,67385659,67385996,67386744,67388110,67388131,67388615,67389043,67389134,67389216,67389550,67391361,67391988,67392081,67392644,67393166,67396219,67397251,67397675,67397732,67398730,67398881,67399914,67400235,67400622,67400846,67400916,67402744,67402907,67402937								0.101485149	False	False	False	False	False	False	13.0	14.0								0
ENSG00000084764	MAPRE3	Q9UPY8	Q9UPY8	2_27140342_C_T	rs4316900	0.013481256	0.000588612	1	1.19e-06	0.478635776	0.009722005	0.368400638	0.00024418	0.344812588	3.92e-05	0.311322356	True	193	816228.686	0.23967547600000005	5	0.324247634	False	27140342,27126027,27126557,27128529,27128834,27129309,27129735,27130332,27130891,27131022,27131849,27132641,27132822,27133934,27134925,27137307,27137616,27137671,27138285,27138594,27138911,27139305,27139747,27139888,27140022,27140099,27140573,27140741,27141339,27141349,27141359,27141504,27141515,27142091,27147272,27148654,27149258,27149366,27150891,27151842,27151919,27152398,27152735,27153095,271…		2_27241795_A_ATTA;2_27227706_CA_C;			2_27241795_A_T;2_27241795_A_ATTA;2_27239949_G_T;2_27237614_A_G;2_27233859_T_C;2_27233789_T_C;2_27233467_T_C;2_27231145_G_A;2_27229892_C_A;2_27229891_TC_AA;2_27229891_T_A;2_27229891_TC_AA;2_27229372_C_G;2_27227707_A_G;2_27227706_CA_C;2_27226954_A_G;2_27224209_T_C;2_27217228_G_A;2_27217102_T_A;2_27215269_A_T;2_27212596_G_A;2_27212526_A_C;2_27211212_A_G;2_27210302_C_G;2_27210205_G_A;2_27208867_T_A;2…			0.410891089	False	True	False	True	False	False	4.0	5.0	2_27137671;2_27166822	rs12612619;rs6707735	Venous thromboembolism adjusted for sickle cell variant rs77121243-T;Cognitive performance (MTAG)	3E-6;4E-8	MAGIC_FG-METABO_EUR_2012	4.2500000000000005e-19		9	2.0699999999999997e-21
ENSG00000085063	CD59	E9PNW4	E9PNW4	11_33755956_C_T	rs3181269	2.08e-07	1.8e-09	1	4.58e-13	-0.813248823	7.939999999999999e-10	-0.7350972029999999	2.34e-20	-0.8531043309999999	2.32e-25	-0.999343562	True	202	9676033.968	0.172016865	4	0.193741691	False	3,375,595,633,757,770					11_33757770_G_A;11_33755956_C_T;			0.185643564	False	False	False	True	False	False	4.0	4.0	11_33757770	rs2273121	Blood protein levels	5.00E-41				21	6.899999999999999e-30
ENSG00000085377	PREP	P48147	P48147	6_105783150_A_C		0.0075009	0.000293258	1	1.14e-06	-0.260359992	8.24e-06	-0.412763661	2.46e-16	-0.301963123	6.720000000000001e-05	-0.290783044	True	202	68708879.64	0.128885829	36	0.108077221	False	###############################################################################################################################################################################################################################################################					6_105799455_C_T;6_105799241_T_C;6_105798482_T_C;6_105796572_T_C;6_105796430_G_A;6_105795907_C_T;6_105795406_G_A;6_105794683_C_T;6_105794333_A_G;6_105787812_A_G;6_105787131_A_G;6_105786497_T_G;6_105782455_A_G;6_105781584_C_G;6_105780539_C_T;6_105778067_C_T;6_105776312_C_T;6_105776289_T_C;6_105774660_C_G;6_105774061_T_C;6_105771166_C_A;6_105769900_A_T;6_105769201_C_T;6_105768250_G_A;6_105783150_A_C;			0.202970297	False	False	False	True	False	False	35.0	36.0								2	2.38e-09
ENSG00000085491	SLC25A24	Q6NUK1	Q6NUK1	1_108740419_C_T	rs828994	8.62e-17	6.06e-20	1	1.98e-24	-1.048994182	1.7e-21	-1.072305212	2.69e-30	-1.071074798	1.87e-35	-1.130114087	True	202	43957634.9	0.245176398	27	0.159558597	False	108740419,108734993,108735388,108735787,108737086,108737112,108737302,108737425,108737551,108737806,108738360,108738436,108738624,108739035,108739104,108739171,108739214,108739228,108739434,108739705,108739726,108739849,108740779,108741065,108742892,108742904,108742954,108743042,108743140,108743178		1_108742904_CGCGCAGG_C;1_108739434_AAAG_A;1_108738624_GAA_G;1_108737806_T_TCTAAA;1_108737086_AG_A;		1_108743178_C_G;1_108743140_C_G;1_108743042_C_A;1_108742954_A_C;1_108742904_CGCGCAGG_C;1_108742892_T_G;1_108735388_T_A;	1_108741065_T_C;1_108740779_G_A;1_108739849_C_T;1_108739705_C_T;1_108739434_AAAG_A;1_108739228_A_C;1_108739214_T_C;1_108739171_A_G;1_108739104_A_G;1_108739035_A_G;1_108738624_G_A;1_108738624_GAA_G;1_108738436_A_C;1_108738360_C_A;1_108737806_T_TCTAAA;1_108737551_T_C;1_108737425_T_C;1_108737302_C_G;1_108737112_G_A;1_108737086_AG_A;1_108735787_T_C;1_108735388_T_A;1_108734993_G_C;1_108740419_C_T;	1_108742892_T_G;1_108741065_T_C;1_108740779_G_A;1_108739849_C_T;1_108739705_C_T;1_108739434_AAAG_A;1_108739228_A_C;1_108739214_T_C;1_108739171_A_G;1_108739104_A_G;1_108739035_A_G;1_108738624_G_A;1_108738624_GAA_G;1_108738436_A_C;1_108738360_C_A;1_108737806_T_TCTAAA;1_108737551_T_C;1_108737425_T_C;1_108737302_C_G;1_108737112_G_A;1_108737086_AG_A;1_108735787_T_C;1_108735388_T_A;1_108734993_G_C;1_10…		0.195544554	True	True	False	True	False	False	27.0	27.0					Astle-W_baso-neut-sum_EUR_2017;Astle-W_gran-p-myeloid-wbc_EUR_2017;Astle-W_gran_EUR_2017;Astle-W_myeloid-wbc_EUR_2017;Astle-W_neut-eo-sum_EUR_2017;Astle-W_wbc_EUR_2017	1.426193	3.6999999999999996e-18	22	5.65e-46
ENSG00000085978	ATG16L1	Q676U5	Q676U5	2_234172846_A_G	rs6708373	0.000200849	4.09e-06	1	3e-08	0.542053624	1.16e-05	0.452317354	2.9500000000000006e-08	0.548622937	1.58e-17	0.635750365	True	202	6735606.402000003	0.126971158	18	0.147609615	True	234172846,234143048,234143373,234145618,234145944,234146271,234146550,234147175,234147930,234148383,234148586,234149039,234149702,234151031,234151045,234151615,234151832,234153366,234153848,234154014,234154139,234154651,234156536,234157137,234157258,234157688,234157733,234157741,234158839,234160345,234160669,234161211,234161448,234161583,234161769,234162153,234163683,234167234,234167421,234167881…	2_234183368_A_G;	2_234203578_TC_T;2_234154014_A_AG;2_234151832_TG_T;		2_234203597_T_C;2_234203578_TC_T;2_234160345_T_G;	2_234192616_G_A;2_234185999_G_A;2_234185267_C_T;2_234184952_T_C;2_234184417_G_A;2_234183718_T_C;2_234183468_G_A;2_234182240_C_T;2_234181848_C_T;2_234180410_A_G;2_234179690_C_T;2_234178453_C_T;2_234176609_C_T;2_234175706_G_T;2_234173503_G_A;2_234172915_G_C;2_234172188_C_G;2_234170369_T_C;2_234169822_C_T;2_234167881_T_A;2_234167421_C_T;2_234167234_A_G;2_234163683_G_C;2_234162153_A_G;2_234161769_C_T…			0.443069307	True	True	True	True	False	False	16.0	18.0	2_234158839;2_234161448;2_234161448;2_234161583;2_234173503;2_234173503;2_234180410;2_234183368;2_234184417;2_234185267	rs10210302;rs6752107;rs6752107;rs6738490;rs12994997;rs12994997;rs3828309;rs2241880;rs3792109;rs36001488	Crohn's disease;Crohn's disease;Inflammatory bowel disease;Crohn's disease;Crohn's disease;Inflammatory bowel disease;Crohn's disease;Crohn's disease;Crohn's disease;Pediatric autoimmune diseases		Astle-W_irf_EUR_2017;IBDGC_Chrons-Disease_EUR_2015;IBDGC_IBD_EUR_2015	0.582182085	9.71e-11	10	2.36e-26
ENSG00000087008	ACOX3	O15254	O15254	4_8370667_A_T	rs3775904	0.015003714	0.000672647	1	5.81e-08	0.656159545	2.67e-06	0.783278769	0.00073921	0.419018357	0.213627814	0.165851209	True	202	2586713.397	0.217010307	12	0.29837186600000004	False	83,706,678,373,893					4_8373893_C_T;4_8370667_A_T;			0.113861386	False	False	False	True	False	False	9.0	9.0								5	1.49e-08
ENSG00000087299	L2HGDH	Q9H9P8	Q9H9P8	14_50802727_A_C	rs7148089	0.004758182	0.000167648	1	5.66e-08	-0.402135449	7.84e-06	-0.498612137	3.15e-11	-0.411797149	3.79e-14	-0.480511131	True	202	11551506.55	0.190079063	18	0.153348694	False	50802727,50714274,50714985,50722359,50726304,50727010,50727109,50727219,50727483,50728736,50729250,50732947,50734100,50736725,50739485,50740191,50740605,50740700,50743180,50743732,50745123,50746096,50747337,50748853,50749924,50750316,50750577,50751199,50751565,50753242,50753992,50754681,50755671,50755991,50756089,50757095,50757131,50759678,50761847,50765758,50768483,50769327,50769455,50769717,507…	14_50778816_A_C;	14_50776279_TA_T;14_50775740_G_GC;14_50775740_GTTTTGAGAGT_G;14_50770177_T_TA;14_50768483_ATA_A;14_50746096_TG_T;14_50745123_A_ATTACTT;		14_50779229_C_T;14_50750577_A_G;	14_50777430_T_C;14_50776545_A_G;14_50776279_TA_T;14_50776241_C_T;14_50775740_G_GC;14_50775740_GTTTTGAGAGT_G;14_50775319_C_A;14_50773576_T_C;14_50773540_T_A;14_50773296_T_G;14_50772403_C_T;14_50770177_T_TA;14_50770177_T_A;14_50769901_A_G;14_50769455_G_T;14_50769327_A_G;14_50768483_A_G;14_50768483_ATA_A;14_50765758_G_A;14_50761847_G_C;14_50759678_A_G;14_50757131_A_C;14_50757095_C_T;14_50756089_C_T;…		14_50769717_G_A;	0.425742574	True	True	True	True	False	True	17.0	18.0								7	5e-14
ENSG00000087884	AAMDC	E9PNP3	E9PNP3	11_77325222_A_G	rs11822592	1.1900000000000002e-13	7.68e-17	2	7.0199999999999995e-22	-0.998501208	3.5700000000000014e-13	-0.993080361	7.18e-06	-0.725364586	2.43e-09	-0.66216768	True	202	6019103.14	0.203668516	6	0.162474112	False	77325222,77245728,77245947,77250912,77253788,77254266,77257804,77276462,77280090,77281474,77281589,77281636,77282025,77282081,77282167,77282207,77282510,77283055,77283394,77283395,77283672,77283687,77283882,77284948,77284991,77285411,77288495,77289035,77289090,77289678,77290439,77290835,77291457,77292650,77292707,77292857,77294685,77295579,77296055,77296096,77296319,77298292,77298406,77298815,772…	11_77583266_G_A;	11_77607698_CAA_C;11_77590176_GAAAAAAAGATAAAAGAAATCCTCTATAACTAGGCAACTGCTAGGAATGAGGATGAAATGTGAAGTTAAAGAAATATCAAAATGGAAGCAGTAGGGAGAAATTTCTTCATCCGTCTACATTCCCTCCCCTTACCCTCACCAAACAAAACACTGAGCCTGCAGATGTGATGCTGTTCCATCACCTTCCCCTTGGGCTCACTGTGGCACAGAGCCAAAGCTGCTGAGGCAACTGGAGAGCAAGCTAAAAACCCTTCCAGGAAGATAATTGCTTCATGATCTGCTTTATGAACTGGGCTCAAATTCTTATGCAGGTGTGGATTTGGGCAGTTTCAGAAGGTGCATGTGGCTTATTCTGATACCCAGTTGGGC…			11_77626963_A_T;11_77610220_G_C;11_77608554_A_T;11_77608106_G_A;11_77608101_A_G;11_77607698_CAA_C;11_77607589_T_C;11_77604496_A_G;11_77604071_G_A;11_77603520_T_C;11_77603261_G_C;11_77600361_A_G;11_77599576_T_C;11_77597099_A_T;11_77595080_C_T;11_77593347_A_G;11_77590176_GAAAAAAAGATAAAAGAAATCCTCTATAACTAGGCAACTGCTAGGAATGAGGATGAAATGTGAAGTTAAAGAAATATCAAAATGGAAGCAGTAGGGAGAAATTTCTTCATCCGTCTACATTCCCTCCCC…	11_77610220_G_C;11_77608554_A_T;11_77608106_G_A;11_77608101_A_G;11_77607698_CAA_C;11_77607589_T_C;11_77604496_A_G;11_77604071_G_A;11_77603520_T_C;11_77603261_G_C;11_77600361_A_G;11_77599576_T_C;11_77597099_A_T;11_77595080_C_T;11_77593347_A_G;11_77590176_GAAAAAAAGATAAAAGAAATCCTCTATAACTAGGCAACTGCTAGGAATGAGGATGAAATGTGAAGTTAAAGAAATATCAAAATGGAAGCAGTAGGGAGAAATTTCTTCATCCGTCTACATTCCCTCCCCTTACCCTCACCAAACA…		0.116336634	False	True	True	True	False	False	6.0	6.0					Astle-W_mpv_EUR_2017;Astle-W_pdw_EUR_2017	0.00903191	9.27999999999999e-124	16	4.71e-21
ENSG00000088833	NSFL1C	Q9UNZ2	Q9UNZ2	20_1428567_C_T	rs6131519	0.012132935	0.000511279	1	8.59e-08	-0.394815855	0.000217473	-0.27196375100000003	8.84e-12	-0.664675743	3.54e-19	-0.637941414	True	202	46217301.3	0.11627209	23	0.173108216	False	14,285,671,411,544,100,000,000,000,000,000,000,000,000,000,000,000,000,000,000,000,000,000,000,000,000,000,000,000,000,000,000,000,000,000,000,000,000,000,000,000,000,000,000,000,000,000	20_1426393_C_T;			20_1426393_C_T;20_1424303_G_A;20_1423779_C_T;	20_1430204_C_T;20_1428567_C_T;	20_1430204_C_T;20_1426393_C_T;20_1424303_G_A;20_1423779_C_T;20_1428567_C_T;		0.405940594	True	False	True	True	False	False	18.0	23.0								15	4.2999999999999995e-18
ENSG00000088888	MAVS	Q7Z434	Q7Z434	20_3846843_C_T	rs3746660	0.0035875570000000008	0.000116744	1	2.45e-08	-0.482095142	4.870000000000001e-05	-0.541848132	0.777668275	-0.112543074	0.661862125	0.019830499	False	202	7758309.327	0.116988907	16	0.111085656	False	3,846,843,384,917,930,000,000,000,000,000,000,000,000,000,000,000				20_3849179_G_A;20_3846843_C_T;				0.438118812	True	False	False	False	False	False	14.0	17.0								7	5.27e-16
ENSG00000089063	TMEM230	Q96A57-2	Q96A57-2	20_5081049_T_C	rs2715	3.72e-06	4.58e-08	1	4.59e-14	0.494303162	3.69e-10	0.4676490820000001	7.27e-21	0.757285965	9.54e-25	0.750749663	True	202	3364562.66	0.1700664	2	0.195247312	False	5081049,5055138,5055467,5056197,5056899,5058061,5058088,5058791,5059269,5059552,5061017,5061018,5061460,5061789,5062723,5062806,5063568,5063643,5064906,5065093,5065163,5066435,5066731,5067164,5067209,5067352,5067930,5068919,5069133,5069335,5069440,5069714,5069748,5069764,5070020,5070100,5070266,5071029,5071382,5071542,5071680,5071942,5071950,5072373,5072721,5073139,5074892,5075214,5075381,5075777…				20_5081049_T_A;				0.45049505	True	False	False	False	False	False	2.0	2.0								42	7.2e-61
ENSG00000090054	SPTLC1	O15269	O15269	9_94685210_A_C	rs7853136	0.002566201	7.670000000000001e-05	1	1.88e-07	0.467719175	0.000771353	0.427333988	3.25e-09	0.498592937	8.160000000000001e-10	0.539704741	True	202	25092023.19	0.109469172	19	0.17170985100000002	True	94,685,210,946,793,500,000,000,000,000,000,000,000,000,000,000,000,000,000								0.346534653	False	False	False	False	False	False	17.0	19.0								3	1.4599999999999998e-07
ENSG00000090861	AARS	P49588	P49588	16_70401687_A_T	rs8063690	0.043884833	0.002511961	1	1.52e-05	0.24714894	0.04656299	0.268172013	0.025377131	0.230968101	0.080703728	0.127842123	False	202	227517544.6	0.164291432	50	0.108249135	False	###############################################################################################################################################################################################################################################################		16_70292798_CAG_C;			16_70323126_C_T;16_70308824_A_C;16_70302034_G_T;16_70292798_CAG_C;			0.400990099	False	True	False	True	False	False	47.0	50.0								4	2.29e-10
ENSG00000091972	CD200	U3KQG5	U3KQG5	3_112076086_G_C	rs13084367	0.021309563	0.001045149	1	1.76e-06	-0.369085803	0.000254691	-0.394722944	1.78e-07	-0.483728285	0.013361399	-0.168341627	True	201	1687294.875	0.237558387	3	0.213761189	False	112,076,086,112,051,000,000,000,000,000,000,000,000,000,000,000,000,000,000,000,000,000,000,000,000,000,000,000,000,000,000,000,000,000,000,000,000,000,000	3_112063850_C_A;	3_112053595_GAA_G;3_112053595_GA_G;		3_112063850_C_A;3_112051427_G_T;	3_112073133_T_C;3_112069755_T_C;3_112066141_C_T;3_112063250_C_T;3_112062224_C_G;3_112059213_G_A;3_112055839_A_T;3_112053595_GAA_G;3_112053595_GA_G;3_112052103_G_T;3_112051758_G_A;3_112076086_G_C;	3_112073133_T_C;3_112069755_T_C;3_112066141_C_T;3_112063850_C_A;3_112063250_C_T;3_112062224_C_G;3_112059213_G_A;3_112055839_A_T;3_112053595_GAA_G;3_112053595_GA_G;3_112052103_G_T;3_112076086_G_C;		0.376237624	True	True	True	True	False	False	3.0	3.0								0
ENSG00000092068	SLC7A8	Q9UHI5	Q9UHI5	14_23630841_A_G	rs2180397	0.082226943	0.005880916	1	2.45e-05	-0.503983251	0.001779511	-0.910966657	7.25e-06	-0.430039788	6.54e-07	-0.6343039570000001	True	202	2982351.428000001	0.324736577	6	0.29583724	True	236,308,412,363,010,000,000,000,000,000,000,000,000,000,000,000		14_23630698_ACT_A;14_23630697_AAC_A;			14_23632506_A_G;14_23632204_A_G;14_23631808_T_A;14_23630698_ACT_A;14_23630697_AAC_A;14_23630102_T_G;14_23630841_A_G;			0.15099009900000002	False	True	False	True	False	False	5.0	5.0								0
ENSG00000092094	OSGEP	Q9NPF4	Q9NPF4	14_20916716_G_C	rs938884	0.000227618	4.69e-06	1	3.4900000000000004e-11	-0.651257489	8.75e-08	-0.6015651999999999	7.689999999999998e-21	-0.928474952	2.45e-19	-0.652999103	True	202	9104034.18	0.146764039	15	0.108118453	False	20,916,716,209,093,500,000,000,000,000,000,000,000,000,000,000,000,000,000,000,000,000,000,000,000,000,000				14_20923007_C_A;14_20922994_C_A;	14_20916705_T_C;14_20916716_G_C;			0.272277228	True	False	False	True	False	False	14.0	15.0					ReproGen_Age-at-Menopause_EUR_2015	0.02140753		22	9.08e-21
ENSG00000092964	DPYSL2	A0A1C7CYX9	A0A1C7CYX9	8_26549373_C_A	rs71553815	0.057803485	0.003661474	1	4.65e-06	-0.512594686	0.00030732700000000003	-0.53570477	5.63e-06	-0.337150092	3.81e-07	-0.373857839	True	202	161433935.1	0.172329702	26	0.113445773	False	26549373								0.096534653	False	False	False	False	False	False	23.0	25.0								0
ENSG00000093000	NUP50	Q9UKX7	Q9UKX7	22_45553563_T_C	rs132832	0.028339449	0.001506041	1	6.03e-07	-0.439032937	8.68e-05	-0.5439889489999999	4.1500000000000005e-20	-0.488377288	0.097846401	-0.102917532	True	202	51383883.98	0.082971696	33	0.13789392	False	45553563,45545400,45551123,45554197,45557189,45557244,45557803,45558416,45559193,45559631,45559771,45559908,45559997,45560401,45560584,45560707,45560767,45560787,45563561,45563656,45564834,45570105,45570594,45579731,45580159,45580899,45581521,45581745,45583898				22_45581745_C_T;22_45581521_C_T;22_45580899_G_C;22_45560584_C_T;22_45559997_T_C;22_45559908_C_T;22_45559771_C_A;	22_45580159_G_C;22_45579731_C_A;22_45570594_C_T;22_45570105_G_C;22_45564834_G_C;22_45563656_T_C;22_45563561_G_A;22_45560787_T_C;22_45560767_G_A;22_45560707_T_C;22_45560584_C_T;22_45560401_A_C;	22_45570594_C_T;22_45570105_G_C;22_45564834_G_C;22_45563656_T_C;22_45563561_G_A;22_45560787_T_C;22_45560767_G_A;22_45560707_T_C;22_45560584_C_T;22_45560401_A_C;22_45559997_T_C;22_45559908_C_T;		0.351485149	True	False	False	True	False	False	31.0	33.0	22_45570105	rs132887	Mean corpuscular hemoglobin		Benyamin-B_ALS_Mixed_2017	0.0008561939999999999	8.719999999999995e-70	13	2.81e-20
ENSG00000093072	CECR1	A0A087X0I3	A0A087X0I3	22_17680519_A_C	rs17807317	0.00033199300000000005	7.42e-06	1	8.51e-10	0.761629349	1.33e-05	0.95982032	9.47e-52	1.255015733	4.43e-51	1.307292151	True	106	384253.1763	0.515510108	1	0.484872222	False	17,680,519,176,809,700,000,000,000,000,000				22_17680519_A_C;	22_17685351_C_A;22_17685194_T_A;22_17680971_G_A;22_17680519_A_C;			0.45049505	True	False	False	True	False	False	1.0	1.0								41	1.2999999999999987e-103
ENSG00000093144	ECHDC1	Q9NTX5	Q9NTX5	6_127700671_A_G		0.003403057	0.000107155	1	5.48e-07	0.369267841	2.95e-05	0.398208517	0.000111966	0.36541447	1.18e-05	0.289499704	True	202	12032832.54	0.182835444	14	0.105459118	False	127700671,127545428,127545492,127546605,127551376,127553539,127555963,127565314,127570560,127571676,127572096,127572761,127574044,127576234,127576363,127576497,127580405,127580758,127581210,127581763,127584808,127585522,127587086,127587915,127589302,127590400,127592501,127594214,127595786,127596782,127597591,127598619,127600630,127605898,127606160,127606588,127609691,127613966,127615000,127618019…		6_127661887_GT_G;6_127653994_TG_T;6_127633203_TA_T;6_127630589_TAAAGAA_T;6_127622141_TACC_T;		6_127664258_G_C;	6_127664258_G_C;6_127661887_GT_G;6_127659473_A_T;6_127658855_G_A;6_127658222_G_A;6_127658221_TG_TAT;6_127655614_G_A;6_127655485_C_T;6_127653994_TG_T;6_127653758_G_A;6_127652539_C_T;6_127650299_T_C;6_127646856_A_T;6_127645719_T_A;6_127643398_T_C;6_127642703_T_C;6_127640190_A_G;6_127638600_C_G;6_127638348_A_T;6_127637374_T_C;6_127636823_T_C;6_127636733_A_G;6_127635285_C_T;6_127635217_G_A;6_12763492…	6_127664258_G_C;6_127661887_GT_G;6_127659473_A_T;6_127658855_G_A;6_127658222_G_A;6_127658221_TG_TAT;6_127655614_G_A;6_127655485_C_T;6_127653994_TG_T;6_127653758_G_A;6_127652539_C_T;6_127650299_T_C;6_127646856_A_T;6_127645719_T_A;6_127643398_T_C;6_127642703_T_C;6_127640190_A_G;6_127638600_C_G;6_127638348_A_T;6_127637374_T_C;6_127636823_T_C;6_127636733_A_G;6_127635285_C_T;6_127635217_G_A;6_12763492…		0.277227723	True	True	False	True	False	False	14.0	14.0								6	1.29e-20
ENSG00000095261	PSMD5	Q16401	Q16401	9_123609204_T_C	rs12553812	0.014008274	0.000308777	2	1.77e-09	-1.214821084	1.4e-08	-1.212093827	4.64e-09	-1.205177265	2.7100000000000004e-09	-1.146366584	True	202	27609153.45	0.145637953	24	0.102024426	True	123609204								0.051980198	False	False	False	False	False	False	15.0	17.0								1	2.47e-09
ENSG00000095485	CWF19L1	Q69YN2	Q69YN2	10_101946014_C_G		0.049405972	0.002937871	1	3.01e-06	-0.39202956	0.000512404	-0.648682091	0.233430493	-0.140886811	0.002521752	-0.22135664	True	202	18111258.79	0.09823007	20	0.08493829	False	101946014,101890330,101893296,101893418,101894125,101894606,101896606,101900579,101901775,101903412,101910013,101960966,101963299,101967212,101970997,101972378,101972757,101973097,101973388,101977883,101996286,101996295,101999394,102006429,102007714,102008169,102011211,102016268,102023006,102025282,102028467,102038566,102038685,102039458,102039463,102044839,102049300		10_102025282_CT_C;			10_102025282_CT_C;10_102023006_C_T;10_102016268_G_A;10_102011211_A_G;10_102008169_C_G;10_102007714_A_C;10_102006429_T_C;10_101999394_A_G;10_101996295_A_G;10_101996286_C_T;			0.497524752	False	True	False	True	False	False	18.0	20.0								44	7.9e-46
ENSG00000097046	CDC7	O00311	O00311	1_92016934_C_T	rs61798047	0.016002555	0.000727323	1	3.54e-07	-0.437068028	0.000180558	-0.325481921	1.1799999999999999e-18	-0.691608652	9.69e-23	-0.7174342290000001	True	202	8013908.112000002	0.116935919	16	0.12242201	True	9,201,693,492,021,460								0.48019802	False	False	False	False	False	False	15.0	16.0	1_92021464	rs12134245	Breast cancer		Astle-W_neut-p-gran_EUR_2017	1.9300000000000002e-15	1.46e-42	29	1.9399999999999997e-37
ENSG00000099810	MTAP	B4DUC8	B4DUC8	9_21900977_A_G	rs7028211	0.054255946	0.00336599	1	3.45e-06	-0.256940528	0.004380197	-0.385419425	0.0009922960000000002	-0.364724448	0.022065562	-0.165141114	True	202	37357176.98	0.163002277	18	0.177680111	False	2,190,097,721,862,270,000,000,000,000,000,000,000,000,000,000,000,000,000,000,000,000		9_21888645_G_GC;		9_21862271_A_C;	9_21898997_A_G;9_21889401_A_T;9_21889292_A_G;9_21888645_G_GC;9_21884052_T_C;9_21881338_T_C;9_21862271_A_C;9_21900977_A_G;	9_21862271_A_C;		0.264851485	True	True	False	True	False	False	15.0	18.0								9	3.39e-11
ENSG00000100033	PRODH	A0A087WWM6	A0A087WWM6	22_18921223_T_C	rs4819759	3.71e-05	6.25e-07	1	1.29e-12	0.60940191	1.6899999999999995e-09	0.599266449	1.01e-18	0.820957374	2.68e-16	0.579481594	True	202	6550448.658	0.334612447	21	0.233989747	False	189,212,231,892,202,000,000,000	22_18923745_G_T;			22_18923745_G_T;	22_18923745_G_T;22_18922022_T_C;22_18921223_T_C;			0.472772277	True	False	True	True	False	False	21.0	21.0								3	4.7799999999999996e-15
ENSG00000100075	SLC25A1	P53007	P53007	22_19158116_G_A	rs807673	0.048330056	0.002851264	1	1.33e-05	0.414380534	0.005597031	0.487894069	0.0007853560000000001	0.334117445	1.17e-05	0.452614203	True	202	39777748.18	0.163156793	13	0.179973434	False	19158116								0.158415842	False	False	False	False	False	False	11.0	13.0								0
ENSG00000100106	TRIOBP	Q9H2D6-2	Q9H2D6-2	22_38166272_G_A	rs13058615	0.006172914	7.759999999999999e-05	3	4.03e-09	-0.4529263570000001	0.000653686	-0.438869182	3.87e-14	-0.658760449	3.7e-17	-0.493148183	True	202	9947056.113	0.125173061	26	0.128793445	False	38166272,38103545,38105253,38106108,38109115,38113878,38115318,38115692,38122967,38123364,38126364,38126582,38126728,38126746,38127627,38127950,38130459,38134166,38136676,38138379,38140352,38144235,38148882,38150190,38154690,38158709,38160794,38163013,38164106,38165223,38165587,38172213,38172380,38175955,38176216,38179120,38179473,38180487,38181115,38183997,38184685,38184872,38185971,38185994,381…	22_38130459_G_T;	22_38165223_CG_C;		22_38172380_C_A;22_38172213_G_A;22_38164106_C_T;22_38130459_G_T;	22_38165587_G_A;22_38165223_CG_C;22_38163013_A_C;22_38160794_A_C;22_38158709_A_G;22_38154690_A_G;22_38150190_G_A;22_38148882_G_A;22_38144235_C_T;22_38140352_T_G;22_38138379_G_C;22_38136676_C_T;22_38134166_G_A;22_38127950_C_T;22_38127627_C_T;22_38126746_C_A;22_38126728_T_C;22_38126582_C_T;22_38126364_G_A;22_38123364_C_T;22_38122967_G_A;22_38115692_G_A;22_38115318_C_T;22_38113878_C_G;22_38109115_G_…	22_38165587_G_A;22_38165223_CG_C;22_38164106_C_T;22_38163013_A_C;22_38160794_A_C;22_38158709_A_G;22_38154690_A_G;22_38150190_G_A;22_38148882_G_A;22_38144235_C_T;22_38140352_T_G;22_38138379_G_C;22_38136676_C_T;22_38134166_G_A;22_38130459_G_T;22_38127950_C_T;22_38127627_C_T;22_38126746_C_A;22_38126728_T_C;22_38126582_C_T;22_38126364_G_A;22_38123364_C_T;22_38122967_G_A;22_38115692_G_A;22_38115318_C_…	22_38164106_C_T;	0.294554455	True	True	True	True	False	True	22.0	26.0	22_38138379;22_38138379;22_38138379;22_38138379;22_38138379;22_38138379	rs4396807;rs4396807;rs4396807;rs4396807;rs4396807;rs4396807	Cognitive performance;Cognitive performance (MTAG);Highest math class taken (MTAG);Intelligence;Self-reported math ability (MTAG);Systolic blood pressure					33	1.58e-42
ENSG00000100263	RHBDD3	Q9Y3P4	Q9Y3P4	22_29775797_C_T	rs78068506	0.0006604110000000001	1.63e-05	1	3.67e-09	-1.377230847	0.41769167	-0.332674099	1.3300000000000002e-09	-1.038375551	2.51e-09	-0.6824394290000001	True	193	521185.1955	0.218018778	3	0.32292968	False	29775797								0.051980198	False	False	False	False	False	False	1.0	1.0								3	1.6100000000000005e-07
ENSG00000100294	MCAT	Q8IVS2	Q8IVS2	22_43528793_T_C	rs737802	9.12e-05	1.64e-06	1	2.24e-11	0.585163832	1.8e-07	0.731643307	7.890000000000001e-11	0.473988597	3.39e-17	0.570331093	True	202	4683990.695	0.15145384	16	0.122300987	False	435,287,934,352,026,000,000,000,000,000,000,000,000,000,000,000,000,000,000,000,000,000,000,000,000,000,000,000,000,000,000,000,000,000,000,000,000,000,000,000	22_43529314_G_C;			22_43529314_G_C;22_43529029_C_T;22_43528251_G_T;22_43528240_G_A;22_43528793_T_C;	22_43533515_A_C;22_43529517_C_T;			0.29702970300000003	True	False	True	True	False	False	16.0	16.0								7	2.25e-15
ENSG00000100376	FAM118A	Q9NWS6	Q9NWS6	22_45724727_G_A	rs6007592	1.6699999999999998e-09	7.01e-12	1	1.1599999999999999e-16	-0.902840647	1.7500000000000003e-18	-1.2011820990000002	7.13e-12	-0.925151681	0.049840591	-0.252629047	True	202	4330360.995	0.289078667	11	0.319806055	False	45724727,45696695,45698149,45698221,45699780,45714937,45715608,45715624,45716397,45717524,45717859,45718041,45723116,45723320,45723807,45723842,45724513,45724999,45725106,45725276,45725392,45725524,45725600,45727565,45727688,45727778,45728163,45728370,45728632	22_45728370_G_A;22_45723807_G_C;	22_45728163_CCTT_C;22_45727778_CCCT_C;22_45724513_TA_T;		22_45725276_G_A;22_45725106_T_C;22_45724999_G_A;22_45724513_TA_T;22_45718041_A_G;22_45717524_C_T;22_45724727_G_A;	22_45728163_CCTT_C;22_45727778_CCCT_C;22_45727688_C_A;22_45727565_T_G;22_45725600_A_G;22_45725524_C_T;22_45725392_T_C;22_45725276_G_A;22_45725106_T_C;22_45724999_G_A;22_45724513_TA_T;22_45723320_C_A;22_45723116_A_G;22_45718041_A_G;22_45717859_C_T;22_45717524_C_T;22_45716397_A_G;22_45715624_A_G;22_45715608_C_T;22_45714937_T_C;22_45724727_G_A;		22_45723842_G_A;	0.264851485	True	True	True	True	False	True	10.0	11.0	22_45725392;22_45727565;22_45727565;22_45728370	rs742013;rs1569414;rs1569414;rs6007594	Balding type 1;Chronic inflammatory diseases (ankylosing spondylitis, Crohn's disease, psoriasis, primary sclerosing cholangitis, ulcerative colitis) (pleiotropy);Heel bone mineral density;Male-pattern baldness					42	1.29e-32
ENSG00000100380	ST13	P50502	P50502	22_41215672_T_C	rs13054099	0.065961366	0.004447354000000001	1	9.58e-06	0.277746722	0.007826796	0.23336056	0.001357746	0.225189408	0.008604891	0.200234098	True	202	74470582.72	0.127415426	11	0.05839031400000001	True	4,121,567,241,359,780								0.29702970300000003	False	False	False	False	False	False	8.0	11.0	22_41215672;22_41215672;22_41215672;22_41359786;22_41359786;22_41359786	rs13054099;rs13054099;rs13054099;rs2413631;rs2413631;rs2413631	Feeling worry;Neurociticism;Neuroticism;Cognitive performance;Feeling worry;Worry					0
ENSG00000100416	TRMU	O75648	O75648	22_46636976_G_A	rs41378347	0.090530872	0.006665565	1	1.28e-05	-0.65586717	0.020569477	-0.8861773629999999	0.014806215	-0.322881393	0.051340175	0.136997431	False	202	1941565.478	0.251576807	12	0.204899349	False	46636976,46622566,46623905,46624286,46624296,46627603,46629479,46630544,46632994,46633505,46636930,46637239,46637254,46637272,46637511,46638128,46638159,46638171,46638211,46638216,46638312,46638365,46638420,46638486,46638540,46639386,46639457,46639462,46641525,46641597,46645148								0.118811881	False	False	False	False	False	False	6.0	6.0	22_46627603;22_46627603	rs4253772;rs4253772	Cholesterol, total;LDL cholesterol	1E-8;3E-8				1	1.3699999999999998e-05
ENSG00000100439	ABHD4	Q8TB40	Q8TB40	14_23062998_T_A	rs11844962	0.022321816	0.00110786	1	1.52e-06	0.491776239	7.96e-11	0.80789916	4.6e-25	0.97590529	1.73e-26	0.893018113	True	202	3024032.736	0.245136232	12	0.304044267	False	230,629,982,306,300,000,000,000,000,000,000,000,000,000,000,000								0.366336634	False	False	False	False	False	False	11.0	12.0								11	1.61e-29
ENSG00000100445	SDR39U1	Q9NRG7-2	Q9NRG7-2	14_24920473_T_C	rs11158711	0.084503547	0.006140886	1	1.55e-05	0.6307271560000001	3.84e-11	1.016084187	2.48e-26	1.436312054	2.22e-12	0.7202749740000001	True	202	2940868.812	0.241923473	9	0.188703384	False	24920473								0.096534653	False	False	False	False	False	False	7.0	8.0								0
ENSG00000100504	PYGL	P06737-2	P06737-2	14_51403503_C_T	rs882860	0.017792337	0.0008289069999999999	1	1.01e-06	-0.375907421	5e-05	-0.435846702	7.07e-10	-0.659979349	1.52e-06	-0.289685119	True	202	38024254.44	0.246510884	36	0.183541143	False	5,140,350,351,402,050,000,000,000,000,000,000,000,000		14_51404133_TAGC_T;14_51404132_ATAG_A;14_51403508_CA_C;			14_51408758_A_G;14_51404133_TAGC_T;14_51404132_ATAG_A;14_51403508_CA_C;14_51403502_CCGTCTCA_CTGTCTC;14_51402055_G_A;14_51403503_C_T;14_51403502_CCGTCTCA_CTGTCTC;			0.26980198	False	True	False	True	False	False	34.0	36.0								7	2.82e-26
ENSG00000100577	GSTZ1	O43708	O43708	14_77800815_C_T	rs11624726	2.32e-08	8.440000000000001e-11	2	3.65e-18	1.165035692	7.52e-18	1.177604818	7.120000000000001e-05	0.346647265	1.07e-14	0.527848895	True	130	1146745.481	0.849584498	1	0.975777169	False	7,780,081,577,790,410,000,000,000,000,000,000,000,000,000,000,000,000,000,000,000,000,000,000,000,000,000,000,000,000,000,000,000,000,000,000,000,000					14_77795638_G_A;14_77791519_A_G;14_77790872_T_A;14_77790416_G_A;	14_77795638_G_A;		0.336633663	False	False	False	True	False	False	1.0	1.0					Astle-W_baso-neut-sum_EUR_2017;Astle-W_gran_EUR_2017;Astle-W_myeloid-wbc_EUR_2017;Astle-W_neut-eo-sum_EUR_2017	7.77e-19	1.04e-19	34	2.81e-26
ENSG00000100580	TMED8	Q6PL24	Q6PL24	14_77881966_T_C	rs144557543	0.053365797	0.003273285	1	7.04e-06	-0.629220416	0.07470823	-0.568053592	0.406615495	-0.065756455	0.260687124	-0.108876177	False	202	1660416.005	0.16514483300000002	7	0.237783052	False	77881966								0.084158416	False	False	False	False	False	False	4.0	5.0								0
ENSG00000100612	DHRS7	Q9Y394-2	Q9Y394-2	14_60616913_A_G	rs424062	0.061142708	0.00398199	1	9.55e-05	-0.465606952	0.000121468	-0.666731938	1.99e-10	-0.7268500590000001	1.06e-10	-0.623765044	True	202	7891957.822000002	0.18908703	13	0.1810409	False	60616913								0.118811881	False	False	False	False	False	False	11.0	12.0								0
ENSG00000100836	PABPN1	Q86U42	Q86U42	14_23707980_A_C		0.00805541	0.000318908	1	2.39e-06	-0.591660767	1.03e-05	-0.57454419	1.364198985	-0.15112813	0.7134120190000001	0.024768165	False	168	286620.2195	0.497144717	2	0.625210115	False	23707980								0.17574257399999998	False	False	False	False	False	False	1.0	2.0								0
ENSG00000100983	GSS	P48637	P48637	20_33478381_A_G	rs1060615	3.55e-11	9.98e-14	1	2.98e-18	0.5618796079999999	3.29e-10	0.721433367	2.6699999999999997e-22	0.972519684	1.85e-23	0.7470104959999999	True	202	19070581.11	0.162016648	21	0.142379582	False	33478381,33278255,33278442,33281562,33281604,33281651,33281736,33289147,33320055,33346047,33374402,33386430,33401059,33401707,33402231,33402829,33405227,33405263,33405664,33406339,33407715,33408137,33408921,33411425,33413176,33413809,33415820,33416536,33416663,33418616,33418740,33419977,33422614,33424151,33424908,33426981,33429684,33429907,33435874,33446974,33448496,33450041,33459127,33460810,334…		20_33533736_AA_A;			20_33540529_A_G;20_33538521_A_G;20_33533736_A_C;20_33533736_AA_A;20_33527838_A_G;20_33526983_T_C;20_33523840_A_C;20_33522869_T_C;20_33522142_T_C;20_33522054_T_C;20_33520802_C_A;20_33520321_T_C;20_33518353_C_T;20_33517014_A_G;			0.349009901	False	True	False	True	False	False	20.0	21.0	20_33418740	rs6088621	Highest math class taken (MTAG)	1.00E-09	Astle-W_mch_EUR_2017;Astle-W_mcv_EUR_2017;Astle-W_pct_EUR_2017;Astle-W_ret-p_EUR_2017;CKDGen_eGFRcrea-NDM_EUR_2016;CKDGen_eGFRcrea_EUR_2016;GIANT_Height-F_EUR_2013;GIANT_Height-M_EUR_2013;GIANT_Height-Tails_EUR_2013;GIANT_Hip-M_Mixed_2015;GIANT_Hip_EUR_2015;GIANT_HipadjBMI_Mixed_2015;GIANT_WHR-adjusted-PA-M_Mixed_2017;GIANT_WHRadjBMI-M-LE-50_EUR_2015;GIANT_Waist-Active_EUR_2017;GIANT_Waist-Non-sm…	0.4999520000000001	1.519999999999997e-231	8	1.02e-12
ENSG00000101000	PROCR	Q9UNN8	Q9UNN8	20_33756830_A_C	rs2378335	0.000160905	3.16e-06	1	1.88e-09	-0.608727631	2.26e-09	-0.5961762070000001	3.99e-14	-0.549298121	3.07e-14	-0.495737718	True	167	335030.5497	0.35550617	1	0.17943698600000002	False	33756830								0.410891089	False	False	False	False	False	False	1.0	1.0					CKDGen_eGFRcrea-NDM_EUR_2016;CKDGen_eGFRcrea_EUR_2016;GIANT_Height-F_EUR_2013;GIANT_Height-M_EUR_2013;GIANT_Height-Tails_EUR_2013;GIANT_Weight_EUR_2013	2.34e-08		0
ENSG00000101017	CD40	P25942	P25942	20_44740196_C_T	rs6074022	2.71e-05	4.31e-07	1	9.64e-10	0.7337985920000001	9.33e-15	0.8977604709999999	6.12e-06	0.57756535	1.82e-07	0.535813847	True	202	812731.875	0.296228687	4	0.394604391	False	447,401,964,473,024,000,000,000,000,000,000,000,000,000,000,000,000,000,000,000,000,000,000,000,000,000,000,000,000,000,000,000				20_44746982_T_C;	20_44749251_T_C;20_44747947_T_G;	20_44749251_T_C;20_44747947_T_G;		0.254950495	True	False	False	True	False	False	4.0	4.0	20_44732089;20_44732089;20_44732089;20_44734310;20_44739419;20_44740196;20_44740196;20_44740196;20_44742064;20_44742064;20_44742064;20_44742064;20_44742064;20_44746982;20_44746982;20_44746982;20_44747947;20_44747947;20_44747947;20_44747947;20_44749251	rs2024568;rs2024568;rs2024568;rs6032662;rs6032664;rs6074022;rs6074022;rs6074022;rs1569723;rs1569723;rs1569723;rs1569723;rs1569723;rs1883832;rs1883832;rs1883832;rs4810485;rs4810485;rs4810485;rs4810485;rs4239702	Cognitive performance (MTAG);Educational attainment (MTAG);Educational attainment (years of education);Rheumatoid arthritis (ACPA-positive);Tonsillectomy;Crohn's disease;Inflammatory bowel disease;Multiple sclerosis;Crohn's disease;Highest math class taken;Highest math class taken (MTAG);Inflammatory bowel disease;Kawasaki disease;Chronic hepatitis B infection;Chronic inflammatory diseases (ankyl…					25	2.7e-19
ENSG00000101751	POLI	Q9UNA4	Q9UNA4	18_51815283_A_G	rs3730783	2.43e-11	5.97e-14	1	2.53e-17	-0.626671879	1.16e-12	-0.954294763	6.490000000000001e-13	-0.578727071	3.7399999999999996e-31	-0.703468502	True	202	5719281.916	0.170689937	17	0.147727201	False	51815283,51781019,51781894,51782775,51784064,51787992,51790593,51793968,51795847,51798047,51799343,51801731,51802708,51802787,51808116,51813966,51817587,51825773,51829629,51830294,51832407,51845450,51846989,51856027,51856987,51864456,51866513,51871051,51871213,51872416,51880841,51881380,51882319		18_51808116_CT_C;18_51801731_CAT_C;		18_51795847_G_T;	18_51846989_G_A;18_51845450_T_A;18_51832407_C_T;18_51830294_C_T;18_51829629_C_T;18_51825773_C_G;18_51817587_T_A;18_51813966_T_A;18_51808116_CT_C;18_51802787_T_C;18_51802708_C_A;18_51801731_CAT_C;18_51799343_G_A;18_51798047_C_G;18_51815283_A_G;	18_51817587_T_A;18_51813966_T_A;18_51815283_A_G;		0.433168317	True	True	False	True	False	False	16.0	17.0	18_51813966;18_51832407	rs3730775;rs12454487	Eczema;Eosinophil counts		Astle-W_eo-p-gran_EUR_2017;Astle-W_eo-p_EUR_2017	0.9742231	2.54e-11	47	9.819999999999992e-69
ENSG00000102699	PARP4	Q9UKK3	Q9UKK3	13_25061955_C_T	rs114564948	0.006508461	0.0002476	1	3.65e-07	-0.838316885	0.000238518	-1.22465705	5.68e-11	-0.968438666	2.87e-11	-1.070756776	True	201	3034608.543	0.196641215	17	0.213881335	False	25061955					13_25061955_C_T;			0.069306931	False	False	False	True	False	False	14.0	14.0								2	1.26e-10
ENSG00000102763	VWA8	A3KMH1-3	A3KMH1-3	13_42414069_T_C	rs143495765	5.99e-12	1.12e-14	1	1.93e-22	-0.961520348	7.71e-20	-1.189080471	1.254324169	-0.10908745	0.971772074	0.002544442	False	202	28602107.28	0.185319128	70	0.092925766	False	42414069,42356356,42357675,42375774,42378660,42382985,42387538,42398237,42405791,42407759,42422747,42427076,42432240,42436639,42437234,42437235,42438288,42438292,42442546,42442759,42451363,42451776,42452091,42454057,42462162,42465713,42471614,42478975,42483416,42492108,42507471,42511201,42515899,42516534,42518878,42523582,42560978	13_42465713_C_T;13_42442546_A_G;	13_42478975_AAAG_A;13_42478974_CAA_C;			13_42518878_T_G;13_42516534_G_C;13_42515899_T_C;13_42511201_A_G;13_42507471_T_C;13_42492108_T_C;13_42483416_G_A;13_42478975_AAAG_A;13_42478974_CAA_C;13_42462162_T_G;13_42454057_C_G;13_42452091_T_C;13_42451776_A_G;13_42451363_T_C;13_42442759_G_C;13_42438292_A_G;13_42438288_A_G;13_42437235_C_A;13_42437234_GC_AA;13_42437234_GC_AA;13_42437234_G_A;13_42436639_C_T;13_42432240_C_G;13_42427076_G_A;13_424…			0.363861386	False	True	True	True	False	False	68.0	70.0								0
ENSG00000102882	MAPK3	P27361	P27361	16_30134656_T_C	rs28529403	1.3e-08	8.529999999999999e-11	1	1.0599999999999999e-15	0.618442254	6.9500000000000015e-16	0.835332491	9.07e-29	0.933428823	2.03e-37	0.992089545	True	202	8796515.486	0.17222399	11	0.172437754	True	30,134,656,301,258,400,000,000,000,000,000,000,000,000,000,000,000,000,000				16_30125840_G_C;	16_30134656_T_C;	16_30125840_G_C;		0.400990099	True	False	False	True	False	False	11.0	11.0	16_30134656;16_30142021	rs28529403;rs57149692	Blood protein levels;Menarche (age at onset)		Astle-W_eo-baso-sum_EUR_2017;Astle-W_eo-p-gran_EUR_2017;Astle-W_eo-p_EUR_2017;Astle-W_mch_EUR_2017;Astle-W_mcv_EUR_2017;Astle-W_mpv_EUR_2017;Astle-W_neut-p-gran_EUR_2017;Astle-W_neut-p_EUR_2017;Astle-W_pct_EUR_2017;Astle-W_rbc_EUR_2017;Astle-W_wbc_EUR_2017;EGGC_Puberty-Growth-10-F-12-M_EUR_2013;GIANT_BMI-F-GT-50_EUR_2015;GIANT_BMI-Non-smokers-M_Mixed_2017;GIANT_BMI-Non-smokers_EUR_2017;GIANT_BMI-…	0.000155437	5.03e-06	14	1.62e-32
ENSG00000103150	MLYCD	O95822	O95822	16_83937796_A_G	rs28627678	0.052064832000000005	0.003150827	1	1.29e-06	-0.545884048	0.000244704	-0.549715828	0.013317758999999998	-0.07109404400000001	0.7470017729999999	-0.030941488	False	202	3764351.292	0.151811951	13	0.16975939899999998	False	8,393,779,683,933,820,000,000,000,000,000,000,000,000		16_83940346_C_CA;			16_83940480_A_G;16_83940346_C_CA;16_83940346_C_A;16_83936496_T_C;16_83933820_A_G;16_83937796_A_G;			0.212871287	False	True	False	True	False	False	12.0	13.0								0
ENSG00000103356	EARS2	Q5JPH6	Q5JPH6	16_23528123_T_C	rs4967958	0.003506255	0.000111635	1	7.68e-08	0.70623308	3.9299999999999986e-05	0.8092659390000001	2.11e-15	0.681901077	1.35e-19	0.832528906	True	202	10815493.82	0.160966525	22	0.254686535	False	23528123,23397248,23400194,23401076,23408427,23408591,23410398,23412897,23420006,23422194,23441465,23450656,23460152,23462501,23462639,23463305,23466969,23470704,23473175,23473275,23475140,23477997,23488031,23493356,23495394,23495677,23500558,23504041,23504248,23510326,23512592,23519986,23521403,23521643,23521750,23521780,23523296,23523345,23523875,23524558,23524601,23526094,23527062,23527332,235…	16_23536684_T_C;	16_23542217_AT_A;16_23535307_CTCTGT_C;16_23535305_ATC_A;16_23535156_CT_C;	16_23541223_G_A;	16_23563501_C_T;16_23536366_T_C;16_23535680_A_C;16_23535307_CTCTGT_C;16_23535305_ATC_A;16_23535156_CT_C;16_23534249_G_C;16_23534098_G_A;	16_23565212_A_G;16_23564198_T_C;16_23562309_A_T;16_23562001_A_G;16_23560771_C_A;16_23560398_G_A;16_23560205_G_T;16_23560204_TG_CT;16_23560204_TG_CT;16_23560204_T_C;16_23558751_G_A;16_23557790_T_C;16_23557718_T_C;16_23556909_G_A;16_23556561_C_T;16_23555726_C_T;16_23554498_A_G;16_23553580_T_G;16_23553255_C_G;16_23550938_T_C;16_23550931_C_T;16_23548801_G_A;16_23545711_G_A;16_23545478_T_G;16_23544447…	16_23565212_A_G;16_23564198_T_C;16_23563501_C_T;16_23562309_A_T;16_23562001_A_G;16_23560771_C_A;16_23560398_G_A;16_23560205_G_T;16_23560204_TG_CT;16_23560204_TG_CT;16_23560204_T_C;16_23558751_G_A;16_23557790_T_C;16_23557718_T_C;16_23556909_G_A;16_23556561_C_T;16_23555726_C_T;16_23554498_A_G;16_23553580_T_G;16_23553255_C_G;16_23550938_T_C;16_23550931_C_T;16_23548801_G_A;	16_23563501_C_T;16_23546561_G_C;	0.118811881	True	True	True	True	True	True	20.0	20.0	16_23401076	rs250585	Egg allergy	4.00E-06				36	1.87e-34
ENSG00000103381	CPPED1	Q9BRF8	Q9BRF8	16_12902636_A_G	rs7196064	0.023456171	0.001183379	1	5.32e-07	-0.406859971	2.442617579	-0.231771631	0.154172235	-0.20762147600000005	0.034349195	-0.236949627	False	202	9020356.363	0.20389226	12	0.12729162900000002	False	12902636,12882094,12883543,12883637,12884437,12884954,12884955,12885079,12885096,12885437,12885661,12885808,12885958,12886029,12887068,12887164,12887178,12887393,12887738,12887849,12887956,12888077,12888291,12889417,12889486,12890090,12890602,12890760,12891226,12891229,12891282,12891812,12891882,12892036,12892984,12893819,12894434,12894565,12894856,12894991,12895888,12895986,12897244,12897395,128…	16_12897578_G_T;	16_12888290_AG_A;16_12888077_C_CA;			16_12897395_C_A;16_12897244_A_G;16_12895986_G_A;16_12895888_C_T;16_12894991_T_C;16_12894856_T_C;16_12894565_C_T;16_12894434_C_T;16_12893819_A_G;16_12892984_G_A;16_12892036_T_C;16_12891882_A_G;16_12891812_C_T;16_12891282_C_G;16_12891229_G_A;16_12891226_A_G;16_12890760_T_C;16_12890602_A_G;16_12890090_C_A;16_12889486_T_C;16_12889417_A_G;16_12888291_G_A;16_12888290_AG_A;16_12888077_C_CA;16_12887956_T…			0.190594059	False	True	True	True	False	False	7.0	12.0								6	3.77e-12
ENSG00000103415	HMOX2	P30519	P30519	16_4450421_T_G	rs9923354	0.000253876	2.73e-06	2	1e-09	-0.5831616629999999	5.05e-05	-0.482169811	3.2299999999999986e-05	-0.5126107839999999	8.859999999999998e-16	-0.524709578	True	202	18241553.23	0.115050998	17	0.08863397199999999	False	4,450,421,445,335,240,000,000,000,000,000,000,000,000,000,000,000,000,000,000,000,000,000,000,000,000,000,000,000,000,000,000,000,000,000,000,000,000,000,000,000,000,000,000,000								0.232673267	False	False	False	False	False	False	16.0	17.0	16_4470027;16_4476089	rs6500596;rs1139652	Schizophrenia;White blood cell count		GIANT_HipadjBMI_Mixed_2015;GIANT_WHR-adjusted-Smoking_EUR_2017	2.08e-14		8	2.6e-14
ENSG00000103494	RPGRIP1L	A0A087WX34	A0A087WX34	16_53555224_T_C	rs8051156	0.048353489000000006	0.002858306	1	7.49e-06	0.5243240889999999	0.253890486	0.398042071	5.34e-14	0.5657021170000001	0.006625575999999999	0.200328108	True	168	1229786.864	0.207689321	3	0.497325911	False	5,355,522,453,557,720								0.324257426	False	False	False	False	False	False	3.0	3.0								0
ENSG00000103671	TRIP4	Q15650	Q15650	15_64826567_G_A	rs111607205	0.077673962	0.005500731	1	1.53e-05	0.663981509	0.002159816	0.678773345	0.000127897	0.585198843	6.12e-05	0.605887705	True	202	10451807.49	0.101535851	24	0.127546555	True	64826567,64443147,64443546,64447066,64451961,64452603,64453178,64453784,64455356,64455366,64459327,64459604,64460028,64470439,64474051,64477584,64478060,64479321,64481158,64485548,64486779,64486985,64489414,64491971,64491998,64494036,64495852,64497372,64498303,64500266,64504569,64505401,64507904,64508647,64509095,64510431,64517967,64518081,64520460,64521637,64523419,64525553,64529436,64536595,645…		15_64743568_TC_T;15_64681206_GGTTGGGGAAATGAAGGGGCTT_G;			15_64744790_T_C;15_64743568_TC_T;15_64741495_T_G;15_64740810_G_A;15_64736091_A_G;15_64734339_C_T;15_64730822_G_C;15_64730596_G_T;15_64730384_T_C;15_64721927_G_T;15_64721745_C_A;15_64716977_C_G;15_64714903_T_G;15_64713525_T_C;15_64712982_C_A;15_64706777_A_G;15_64706332_A_G;15_64704941_G_A;15_64701195_C_T;15_64700223_G_A;15_64693625_C_A;15_64692418_G_T;15_64692152_T_C;15_64691181_C_G;15_64686766_T_…	15_64714903_T_G;15_64713525_T_C;15_64712982_C_A;15_64706777_A_G;15_64706332_A_G;15_64704941_G_A;15_64701195_C_T;15_64700223_G_A;15_64693625_C_A;15_64692418_G_T;15_64692152_T_C;15_64691181_C_G;15_64686766_T_A;15_64681206_GGTTGGGGAAATGAAGGGGCTT_G;	15_64706332_A_G;	0.066831683	False	True	False	True	False	True	15.0	16.0	15_64744790;15_64771483	rs72741332;rs72741349	Menarche (age at onset);Plasma factor VII activating protease levels					28	2.3800000000000005e-29
ENSG00000103811	CTSH	A0A087X0D5	A0A087X0D5	15_79234957_G_A	rs34593439	7.32e-12	1.46e-14	1	1.7299999999999997e-18	-1.070237687	1.3600000000000002e-16	-1.076948681	8.2e-07	-0.615845726	4.98e-09	-0.598066854	True	202	3679584.659	0.32889544	7	0.246279852	False	79234957					15_79234957_G_A;			0.113861386	False	False	False	True	False	False	5.0	6.0	15_79234957;15_79234957	rs34593439;rs34593439	Blood protein levels;Type 1 diabetes	3E-241;9E-14	van-der-Harst-P_CAD_Mixed_2018	1.4899999999999995e-90	2.689999999999994e-262	31	1.84e-36
ENSG00000103876	FAH	P16930	P16930	15_80444873_G_A	rs11856087	0.06325302099999999	0.004210171	1	1.74e-06	-0.372490917	2.02e-05	-0.429768096	2.88e-12	-0.7327901090000001	0.022208121	-0.20760012100000005	True	202	10416634.49	0.18399764	13	0.148027338	False	8,044,487,380,441,880,000,000,000,000,000,000,000,000			15_80445188_G_C;	15_80445292_G_C;15_80445219_G_A;15_80445188_G_C;15_80444873_G_A;	15_80445292_G_C;15_80445219_G_A;15_80445188_G_C;			0.353960396	True	False	False	True	True	False	12.0	13.0								5	9.88e-12
ENSG00000104112	SCG3	Q8WXD2	Q8WXD2	15_52100215_C_T	rs11631530	0.02437561	0.001246885	1	1.56e-05	-0.914822726	0.004797656	-1.139103653	2.270584263	-0.054331578	0.8500441609999999	-0.02076283	False	162	1384862.505	0.383904074	4	0.74835579	False	52100215								0.089108911	False	False	False	False	False	False	2.0	2.0								0
ENSG00000104140	RHOV	Q96L33	Q96L33	15_40986237_T_A	rs2619679	0.08974282800000001	0.006597038	1	2.46e-05	-0.494247373	0.000374651	-0.414164435	0.000245336	-0.32981159	0.000918655	-0.27007796	True	107	814701.4661	0.491746629	1	0.494877035	False	40986237,40878474,40968531,40970724,40973228,40976752,40979543,40981343,40981669,40983574,40988418,40990353,40991430,40993710,40994808,40994853,40998904,40999504,41004175,41004822,41006523,41006939,41007555,41008280,41008313,41010542,41010714,41012029,41012695,41012792,41015079,41016558,41016970,41019560,41019867,41023878,41024303,41024508,41025275,41025457,41025876,41026994,41029177,41030579,410…								0.452970297	False	False	False	False	False	False	1.0	1.0	15_40878474;15_40970724	rs12437696;rs8036817	Red cell distribution width;General cognitive ability					0
ENSG00000104142	VPS18	Q9P253	Q9P253	15_41129467_C_A	rs4924506	0.093818133	0.0035141990000000004	2	3.64e-05	-0.425140428	0.016231	-0.422659942	0.016780855	-0.264260803	0.166208316	-0.086245374	False	202	7752854.853999997	0.096996426	21	0.106928993	True	41,129,467,411,292,400,000,000,000,000,000,000,000,000,000,000,000,000,000,000,000,000,000,000,000,000,000,000,000,000,000,000,000,000,000,000,000,000,000,000,000,000,000,000,000,000,000,000,000,000,000,000,000,000,000,000,000,000,000								0.277227723	False	False	False	False	False	False	17.0	21.0								0
ENSG00000104327	CALB1	P05937	P05937	8_91258298_A_C	rs16904193	0.004165569	0.00014016299999999998	1	1.88e-08	-0.650545303	4.38e-07	-1.158230087	0.001954046	-0.384994704	0.00035329	-0.340625941	True	202	16430564.42	0.369571489	14	0.1608788	False	912,582,989,124,033,000,000,000								0.116336634	False	False	False	False	False	False	13.0	13.0								0
ENSG00000104472	CHRAC1	Q9NRG0	Q9NRG0	8_141528090_C_T	rs4961330	0.061797191	0.004078841	1	1.22e-05	0.447098345	0.000383141	0.54378799	5.78e-17	0.6952025909999999	2.07e-18	0.8942956059999999	True	202	1909987.704	0.174182058	4	0.27980508600000004	True	141,528,090,141,525,000,000,000,000,000,000,000,000,000,000		8_141525725_TA_T;		8_141526038_T_C;8_141525725_TA_T;8_141525465_T_A;				0.160891089	True	True	False	False	False	False	3.0	4.0								26	1.12e-58
ENSG00000104518	GSDMD	G3V1A6	G3V1A6	8_144646352_C_T	rs13276307	2.27e-08	1.6199999999999998e-10	1	5.85e-15	0.746672652	6.89e-10	0.743092008	1.95e-20	0.798571915	1.16e-15	0.605794297	True	202	6110531.044	0.308326845	13	0.186179981	False	144,646,352,144,643,000,000,000,000			8_144643169_C_G;		8_144643169_C_G;			0.27970297	False	False	False	True	True	False	12.0	13.0								10	1.0999999999999999e-26
ENSG00000104679	R3HCC1	Q9Y3T6	Q9Y3T6	8_23114600_C_T	rs11135718	0.066567153	0.004511575	1	1.49e-06	-0.8823825120000001	0.095373642	-0.558526057	0.699053843	-0.35263489299999995	0.952081674	-0.006664239000000001	False	202	744426.0282	0.209174607	4	0.195860931	False	2,311,460,023,109,910,000,000,000,000,000,000,000,000								0.051980198	False	False	False	False	False	False	2.0	3.0								0
ENSG00000104774	MAN2B1	O00754	O00754	19_12815686_A_G	rs10401993	0.08602058300000001	0.006293207	1	4.4e-05	0.320661095	1.0800000000000003e-05	0.485064292	5.33e-08	0.43840135	4.03e-12	0.54455246	True	202	17709077.94	0.147444023	25	0.07648485099999999	False	12815686								0.264851485	False	False	False	False	False	False	22.0	25.0								5	1.49e-08
ENSG00000105137	SYDE1	Q6ZW31-2	Q6ZW31-2	19_15212555_T_C	rs917049	0.002303084	6.74e-05	1	9.25e-07	0.7912903	0.003471791	0.628427755	1.290273936	0.188740998	0.465016783	-0.06686426	False	149	507185.5857	0.196453796	3	0.540797458	False	15212555								0.094059406	False	False	False	False	False	False	2.0	2.0								0
ENSG00000105185	PDCD5	O14737	O14737	19_33068146_T_C	rs34742405	0.040269188	0.002262579	1	5.04e-06	-0.324524876	0.001623199	-0.318466933	0.036911866	-0.181216661	0.08632601	-0.07838714	False	202	12561574.13	0.132261582	9	0.119949853	False	3,306,814,633,064,070,000,000,000,000,000,000,000,000				19_33076973_T_A;	19_33076973_T_A;	19_33076973_T_A;		0.457920792	True	False	False	True	False	False	8.0	9.0								19	6.59e-12
ENSG00000105281	SLC1A5	Q15758	Q15758	19_47288150_C_A	rs8105903	0.009833902	0.000405189	1	2.61e-06	-0.321869899	1.67e-05	-0.379400368	2.4e-15	-0.7534876	2.9e-11	-0.438729043	True	202	14734288.78	0.266741089	9	0.113461743	False	47288150				19_47288150_C_A;	19_47288150_C_A;			0.418316832	True	False	False	True	False	False	9.0	9.0								8	8.409999999999998e-27
ENSG00000105409	ATP1A3	P13637-2	P13637-2	19_42470374_G_A	rs11878287	0.007191083000000002	0.000279461	1	4.21e-06	0.424675252	0.00013453100000000002	0.620110235	7.29e-07	0.376488416	0.00445185	0.211282033	True	202	6889446.016	0.20516541	16	0.152522314	False	42470374,42428767,42431033,42434050,42434316,42434440,42435736,42436237,42436623,42436861,42438483,42438909,42438917,42439263,42439907,42440586,42440981,42444292,42445736,42449187,42450605,42452305,42453423,42455840,42456602,42457609,42457833,42461454,42463447,42467973,42468059,42468127,42468606,42471050,42472189,42474200	19_42471050_G_C;	19_42472189_CAGAG_C;		19_42471050_G_C;	19_42474200_A_T;19_42472189_CAGAG_C;			0.344059406	True	True	True	True	False	False	16.0	16.0								1	3.43e-07
ENSG00000105607	GCDH	Q92947	Q92947	19_13010520_A_G	rs8012	0.000244737	5.19e-06	1	1.93e-10	0.634580798	1.25e-07	0.669308235	3.82e-13	0.6012697379999999	1.8000000000000004e-12	0.483898104	True	202	14112460.05	0.15848672800000002	13	0.202442846	False	130,105,201,301,431,000,000,000				19_13010520_A_G;	19_13014314_T_C;19_13010520_A_G;	19_13010520_A_G;		0.398514851	True	False	False	True	False	False	13.0	13.0	19_13010520;19_13010520;19_13010520	rs8012;rs8012;rs8012	Blood metabolite levels;Mean corpuscular hemoglobin;Mean corpuscular volume					40	4.91e-51
ENSG00000105755	ETHE1	O95571	O95571	19_43995146_G_A	rs36034157	2.68e-08	2.04e-10	1	2.08e-13	-0.912418131	5.27e-11	-0.900828261	8.98e-16	-1.07908081	2.51e-17	-0.812613563	True	202	5098413.161	0.17743128600000002	12	0.159750778	False	43995146,43960114,43979015,43981229,43985711,43985830,43995957,44005463,44005876,44007496,44007627,44007786,44008370,44008489,44008528,44009364,44011568,44014530,44016566,44017703,44019419,44019772,44021274,44021451,44021649,44021773,44022089,44022165,44022663,44022669,44025434,44025822,44025833,44026922,44028295,44031324,44031552,44033545,44033594,44035158		19_44022165_CA_C;			19_44028295_C_T;19_44026922_A_G;19_44025434_G_A;19_44022669_C_T;19_44022663_C_T;19_44022165_CA_C;19_44022089_A_G;19_44021773_A_G;19_44021649_G_A;19_44021451_C_G;19_44021274_C_A;19_44019772_A_G;19_44019419_A_T;19_44017703_C_T;19_44016566_A_T;19_44014530_C_T;19_44011568_C_T;	19_44031324_C_T;19_44028295_C_T;19_44026922_A_G;19_44025434_G_A;19_44022669_C_T;19_44022663_C_T;19_44022165_CA_C;19_44022089_A_G;19_44021773_A_G;19_44021649_G_A;19_44021451_C_G;19_44021274_C_A;19_44019772_A_G;19_44019419_A_T;19_44017703_C_T;19_44016566_A_T;19_44014530_C_T;19_44011568_C_T;	19_44031324_C_T;	0.168316832	False	True	False	True	False	True	12.0	12.0	19_43960114	rs7248167	Heel bone mineral density		Astle-W_baso-neut-sum_EUR_2017;Astle-W_gran-p-myeloid-wbc_EUR_2017;Astle-W_gran_EUR_2017;Astle-W_lymph-p_EUR_2017;Astle-W_mono-p_EUR_2017;Astle-W_myeloid-wbc_EUR_2017;Astle-W_neut-eo-sum_EUR_2017;Astle-W_neut-p_EUR_2017;Astle-W_wbc_EUR_2017	2.37e-07	8.669999999999993e-159	22	3.02e-21
ENSG00000105856	HBP1	O60381-2	O60381-2	7_106796537_C_T	rs62483619	0.016048251	0.000734504	1	7.86e-07	-0.6840960770000001			3.41e-07	-0.51353585	3.39e-07	-0.412180762	True	149	888326.0244	0.28254104	3	0.694663158	False	106796537,106809884,106812246,106817901,106821016,106824580,106835410,106836242,106837866,106847492,106853817,106856002,106862963,106863123,106866178,106866498,106870746,106874065,106876644,106878516,106897500,106899685,106900214,106901741,106906998,106909172,106922106,106934246,106940098,106951579,106965009,106973534,106975059,106985648,106985873,106987988,107000651,107004672,107005246,107022506…					7_106837866_T_G;7_106836242_T_C;7_106835410_C_T;7_106824580_G_A;7_106821016_G_A;7_106817901_A_G;7_106812246_A_G;7_106809884_G_C;	7_106837866_T_G;		0.183168317	False	False	False	True	False	False			7_106853817;7_106856002	rs12672451;rs62483627	Macular thickness;Atrial fibrillation					0
ENSG00000106049	HIBADH	P31937	P31937	7_27603636_G_C	rs6976178	9.12e-05	1.64e-06	1	3.38e-11	-0.518751285	6.11e-06	-0.437093314	7.68e-08	-0.331382566	1.56e-10	-0.419045754	True	202	13521496.99	0.157255122	13	0.16515171	False	27603636					7_27603636_G_C;			0.29702970300000003	False	False	False	True	False	False	11.0	13.0								2	5.57e-21
ENSG00000106066	CPVL	Q9H3G5	Q9H3G5	7_29192895_T_G	rs245895	0.011803103999999998	0.000495998	1	1.74e-07	0.580506732	0.00020446	0.535630418	1.43e-07	0.4888616670000001	1.06e-08	0.508302657	True	202	16252361.41	0.178035655	16	0.193239522	False	29192895					7_29192895_T_G;			0.247524752	False	False	False	True	False	False	15.0	16.0								11	9.33e-12
ENSG00000106153	CHCHD2	Q9Y6H1	Q9Y6H1	7_56156156_C_T	rs6951202	0.0058656540000000005	0.00021834	1	2e-08	0.769122297	1.82e-06	0.687769202	3.09e-06	0.650745517	1.43e-07	0.707999506	True	202	3562790.234	0.494742966	4	0.259385783	False	56156156,56032827,56033033,56033354,56036314,56036750,56038257,56042605,56045146,56049019,56055459,56056145,56060101,56065380,56067216,56071847,56071984,56082622,56086054,56105113,56106397,56107789,56108359,56110071,56110803,56117449,56124754,56131910,56132741,56134136,56136194,56138125,56139450,56140357,56141283,56143251,56146310,56148519,56149110,56149362,56149410,56150596,56150656,56150670,561…				7_56174140_G_T;7_56174115_A_C;7_56169419_C_T;	7_56172361_T_C;			0.185643564	True	False	False	True	False	False	4.0	4.0								15	1.21e-29
ENSG00000106290	TAF6	J3KR72	J3KR72	7_99738053_T_G	rs3779047	0.083752227	0.006029219000000001	1	6.19e-06	-0.378037191	0.11234206	-0.518986132	5.52e-18	-0.8991362690000001	1.43e-31	-0.7977878820000001	True	202	15333375.3	0.089598065	29	0.122011828	False	997,380,539,968,611,000,000,000,000,000,000,000,000,000,000,000,000,000,000,000,000,000,000,000,000,000,000,000,000,000,000,000,000,000,000,000,000,000,000,000,000,000,000,000,000,000,000,000,000,000,000,000,000,000,000,000,000,000,000,000,000,000,000,000								0.467821782	False	False	False	False	False	False	25.0	29.0	7_99701176	rs999885	Menarche (age at onset)					14	3.63e-16
ENSG00000106299	WASL	O00401	O00401	7_123342285_C_T	rs6466882	3.34e-06	3.99e-08	1	1.28e-10	0.484076381	1.4e-07	0.453745528	6.809999999999999e-11	0.415390563	1.84e-11	0.478947413	True	202	13027795.75	0.15381905699999998	16	0.10781742	True	123342285,123260773,123264804,123269819,123273095,123274992,123285478,123286412,123288394,123291314,123292767,123292770,123293152,123293342,123296320,123299304,123299855,123300642,123301940,123303477,123304323,123304609,123305518,123305836,123306470,123307079,123308195,123312392,123313573,123314446,123314618,123315174,123317184,123318557,123318696,123318995,123319312,123319313,123321073,123322716…		7_123378224_G_GTTAA;7_123361936_A_ATAACT;7_123358147_GTTAA_G;7_123348235_AAAC_A;7_123334696_GT_G;7_123329954_A_AATT;7_123329850_ATAAT_A;7_123329849_TATA_T;7_123329846_AATTAT_A;7_123324745_CCAG_C;		7_123322716_T_A;	7_123388474_A_G;7_123382290_C_T;7_123382152_A_C;7_123380821_T_C;7_123380681_C_G;7_123380405_T_A;7_123378471_C_A;7_123378224_G_GTTAA;7_123377213_A_G;7_123377066_G_A;7_123376560_G_A;7_123375505_G_C;7_123375435_G_A;7_123374766_A_G;7_123374412_A_G;7_123373622_T_C;7_123371026_C_A;7_123370903_C_T;7_123370710_A_G;7_123369539_T_C;7_123369044_T_C;7_123368488_G_A;7_123367705_A_C;7_123365788_C_T;7_123364747…		7_123388732_G_A;	0.46039604	True	True	False	True	False	True	15.0	16.0	7_123301940;7_123376560	rs7809453;rs9649465	Attention deficit hyperactivity disorder symptom score;Migraine		Astle-W_pct_EUR_2017;Astle-W_plt_EUR_2017;Astle-W_ret-p_EUR_2017	1.94e-11	2.149999999999998e-129	2	1.1200000000000002e-20
ENSG00000106305	AIMP2	F8W950	F8W950	7_6044521_T_G	rs6978310	2.24e-11	2.63e-14	2	3.0500000000000007e-22	-1.303602026	8.97e-20	-1.277228252	6.95e-24	-1.063313031	0.113033387	-0.09811739	True	149	1446629.752	0.275914475	1	0.154392686	False	604,452,160,439,646,000,000,000,000,000,000,000,000,000,000,000,000,000,000,000,000			7_6054987_G_A;		7_6056157_T_C;7_6055380_G_A;7_6054987_G_A;7_6054389_C_A;7_6052916_A_G;7_6050390_A_G;	7_6054389_C_A;7_6052916_A_G;7_6050390_A_G;		0.21039604	False	False	False	True	True	False	1.0	1.0	7_6054389	rs34097030	Reticulocyte fraction of red cells		Astle-W_hlr-p_EUR_2017;Astle-W_ret-p_EUR_2017	0.000141397	5.770000000000001e-05	2	7.81e-10
ENSG00000106524	ANKMY2	Q8IV38	Q8IV38	7_16657289_C_T	rs56077141	0.0006604110000000001	1.64e-05	1	9.51e-08	0.474411868	1.82e-05	0.37769502	3.81e-10	0.455816357	3.91e-12	0.536731262	True	202	5900654.432999997	0.204705888	12	0.155829074	False	16657289					7_16657289_C_T;	7_16657289_C_T;		0.443069307	False	False	False	True	False	False	12.0	12.0								2	3.66e-07
ENSG00000106603	COA1	Q9GZY4	Q9GZY4	7_43851539_C_A	rs671234	0.000503705	1.19e-05	1	1.2e-08	-0.469138801	3.3100000000000004e-07	-0.479789044	4.44e-10	-0.557782391	4.22e-14	-0.438878912	True	202	5345780.737	0.247831818	5	0.260355269	True	438,515,394,380,469,000,000,000,000,000,000,000,000,000,000,000								0.29950495	False	False	False	False	False	False	5.0	5.0								1	1.84e-07
ENSG00000106853	PTGR1	Q14914	Q14914	9_114366094_G_C	rs966627	1.53e-05	2.31e-07	1	3.7000000000000007e-10	-0.462477041	3.9700000000000005e-08	-0.479153246	3.27e-17	-0.77952175	1.65e-18	-0.822418909	True	202	17641828.03	0.246836535	14	0.125190801	False	114,366,094,114,368,000,000,000,000,000,000,000,000,000,000								0.274752475	False	False	False	False	False	False	13.0	14.0								32	2.3700000000000003e-27
ENSG00000107438	PDLIM1	O00151	O00151	10_96885156_G_A		0.004381118	0.00015026	1	1.91e-08	0.321515361	0.00016189	0.380140086	3.32e-14	0.392373089	2.4500000000000004e-16	0.37305085	True	202	60160628.95	0.22430025	17	0.112669052	True	96885156,96855031,96855320,96855958,96856022,96856695,96858449,96859192,96861246,96862286,96863605,96863988,96866791,96881343,96886919,96886979,96897796,96905783,96906292,96907078,96908521,96914335,96914516,96916499,96917216,96918658,96918708,96919188,96923251,96925446,96926077,96930358,96934501,96935972,96943844,96950518,96951339,96954360,96954732,96955996,96967541,96969456,96969854,96971504,969…		10_97000834_TGA_T;			10_97001343_C_T;10_97000900_A_G;10_97000834_TGA_T;10_97000419_T_G;10_96999708_A_C;			0.391089109	False	True	False	True	False	False	16.0	17.0								0
ENSG00000107798	LIPA	P38571	P38571	10_91004886_A_G		1.64e-07	1.3800000000000002e-09	1	4.18e-14	-0.7090088240000001	1.3e-14	-0.7885503309999999	3.91e-21	-0.669148666	8.42e-23	-0.712924572	True	202	6365259.507	0.388169228	7	0.274354838	False	91,004,886,910,028,000,000,000,000,000,000,000,000,000,000,000,000,000,000,000,000,000,000,000,000,000,000	10_91007360_T_G;		10_91011458_C_T;		10_91011458_C_T;10_91010479_A_C;10_91008879_C_T;10_91007360_T_G;10_91005854_C_T;10_91004916_C_A;10_91003419_A_C;10_91002927_C_T;10_91002804_C_T;10_91004886_A_G;			0.371287129	False	False	True	True	True	False	7.0	7.0	10_91002804;10_91002927;10_91002927;10_91003419;10_91004886;10_91004886;10_91004916;10_91004916;10_91008879;10_91010479	rs1412445;rs1412444;rs1412444;rs1332329;rs2246942;rs2246942;rs2246941;rs2246941;rs2250644;rs2243547	White blood cell count;Coronary artery disease;Coronary heart disease;Myocardial infarction;Coronary artery disease;Coronary artery disease (myocardial infarction, percutaneous transluminal coronary angioplasty, coronary artery bypass grafting, angina or chromic ischemic heart disease);Neutrophil count;Sum neutrophil eosinophil counts;Fibrinogen levels;Red cell distribution width		Astle-W_baso-neut-sum_EUR_2017;Astle-W_gran_EUR_2017;Astle-W_mchc_EUR_2017;Astle-W_myeloid-wbc_EUR_2017;Astle-W_neut-eo-sum_EUR_2017;Astle-W_neut-p_EUR_2017;Astle-W_wbc_EUR_2017;C4D_CHD_Mixed_2011;CARDIoGRAMplusC4D_CHD_Mixed_2015;CARDIoGRAMplusC4D_MI_Mixed_2015;Nelson-CP_CAD_Mixed_2017;van-der-Harst-P_CAD-UKBB_Mixed_2018;van-der-Harst-P_CAD_Mixed_2018	0.500001	0.198858	14	7.75e-39
ENSG00000107902	LHPP	Q9H008	Q9H008	10_126191695_G_A		0.004758182	0.000167579	1	2.77e-07	-0.379604795	8.63e-05	-0.436002289	9.51e-08	-0.537733728	1.78e-10	-0.481226246	True	202	7393396.124	0.263292633	11	0.252250756	False	126,191,695,126,192,000					10_126192509_T_C;10_126191695_G_A;			0.457920792	False	False	False	True	False	False	10.0	11.0								5	6.800000000000001e-09
ENSG00000107959	PITRM1	Q5JRX3	Q5JRX3	10_3214369_A_G		1.17e-05	8.52e-08	2	7.4e-12	0.68614271	6.6e-08	0.896722771	0.0015487679999999998	0.4746732	1.22e-05	0.445048833	True	202	18719364.98	0.144650697	32	0.134484517	False	321,436,932,045,613,000,000,000,000,000,000,000,000,000,000,000,000,000,000,000,000,000,000,000,000,000,000,000,000,000,000,000,000,000,000,000,000,000,000,000,000,000,000,000,000,000,000,000,000		10_3214995_AC_A;		10_3214995_AC_A;	10_3214516_A_G;10_3213564_T_C;10_3212795_C_G;10_3209872_A_G;10_3208210_T_C;10_3208140_G_C;10_3206365_T_C;10_3206256_C_A;10_3205851_C_G;10_3205709_C_A;10_3205194_G_A;10_3205187_C_T;10_3204561_C_T;10_3214369_A_G;		10_3206027_A_G;	0.339108911	True	True	False	True	False	True	29.0	32.0								19	2.63e-21
ENSG00000108039	XPNPEP1	Q9NQW7-3	Q9NQW7-3	10_111875699_G_C		0.015003714	0.0006720060000000001	1	0.000154312	0.519928371	0.18489057	0.70688957					False	202	27642928.03	0.13829145199999998	30	0.105135773	False	111,875,699,111,799,000,000,000,000								0.059405941	False	False	False	False	False	False	12.0	13.0								0
ENSG00000108179	PPIF	P30405	P30405	10_81107135_A_C		0.026221518	0.0013535860000000002	1	3.86e-06	0.295481409	0.00878487	0.327730886	6.19e-16	0.470243539	1.2199999999999999e-16	0.423119901	True	202	18393300.61	0.151366576	10	0.180913347	True	###############################################################################################################################################################################################################################################################				10_81114959_C_T;10_81114060_G_A;	10_81108956_A_G;	10_81108956_A_G;		0.430693069	True	False	False	True	False	False	10.0	10.0	10_81114060;10_81117237;10_81121696;10_81132829;10_81139462	rs7332;rs7917610;rs2145998;rs1923367;rs941873	High light scatter reticulocyte count;High light scatter reticulocyte percentage of red cells;Height;Height;Height	4E-11;6E-11;4E-13;5E-24;4E-7	GIANT_Height-F_EUR_2013	2.2899999999999996e-31		2	1.45e-07
ENSG00000108272	DHRS11	Q6UWP2	Q6UWP2	17_34840664_G_A	rs34713024	0.002373814	6.97e-05	1	3.47e-09	-0.375462452	8.93e-07	-0.420370179	8.02e-05	-0.417582751	2.380000000000001e-05	-0.333729094	True	202	4839466.363	0.187405802	11	0.122216969	False	34840664,34838547,34841669,34843839,34844505,34844756,34849050,34849051,34849052,34853019,34853103,34854280,34855348,34855702,34865131,34876866,34882998,34884149,34890362,34898722,34900120,34900642,34900847,34904985,34905455,34907050,34908219,34908378,34910357,34913528,34913982,34914365,34914601,34914787,34915044,34916879,34918092,34919623,34919643,34924538,34929002,34929379,34932498,34935878,349…		17_34956585_CCA_C;17_34956585_CCA_C;17_34952591_A_AT;17_34952591_AT_A;	17_34956585_CCA_C;17_34956585_CCA_C;	17_34951327_C_T;17_34951091_C_T;	17_34956585_CCA_C;17_34956585_CCA_C;17_34952964_A_T;17_34952789_T_C;17_34952591_A_AT;17_34952591_AT_A;17_34951327_C_T;17_34951091_C_T;17_34950837_T_C;17_34950239_C_T;17_34949598_T_C;17_34949361_C_T;	17_34952964_A_T;17_34952789_T_C;17_34952591_A_AT;17_34952591_AT_A;17_34951327_C_T;17_34951091_C_T;17_34950837_T_C;17_34950239_C_T;17_34949598_T_C;17_34949361_C_T;		0.403465347	True	True	False	True	True	False	11.0	11.0					Benyamin-B_ALS_Mixed_2017;GIANT_BMI-Active_EUR_2017;GIANT_BMI-F-GT-50_EUR_2015;GIANT_BMI-Non-smokers_EUR_2017;GIANT_BMI-adjusted-PA_EUR_2017;GIANT_BMI-adjusted-Smoking-F_Mixed_2017;GIANT_BMI-adjusted-Smoking_EUR_2017;GIANT_BMI_EUR_2018;GIANT_WHR_EUR_2015;Sniekers-S_Intelligence_EUR_2017	1.585978		27	8.92e-23
ENSG00000108587	GOSR1	O95249	O95249	17_28859670_C_A	rs17669080	0.061142708	0.003990972	1	3e-06	-0.4154713820000001	0.02012447	-0.278015324	3.08e-06	-0.212326142	0.002305131	0.212711988	True	202	4164217.414	0.18337923600000008	11	0.356792484	False	288,596,702,873,172,000,000,000,000,000,000,000,000,000,000,000,000,000,000,000,000,000,000,000					17_28812120_G_A;	17_28812120_G_A;		0.29950495	False	False	False	True	False	False	9.0	11.0	17_28812120	rs10512432	General cognitive ability					14	8.02e-13
ENSG00000108592	FTSJ3	Q8IY81	Q8IY81	17_61944620_T_G	rs76306941	4.56e-09	2.45e-11	1	1.74e-14	0.6291768179999999	1.36e-11	0.5507998279999999	9.34e-37	0.937252363	3.2e-39	1.005262546	True	202	55480837.71	0.15026519	30	0.163345493	False	61944620,61776479,61779927,61782325,61784963,61785374,61788634,61791210,61793818,61794839,61795328,61795439,61796306,61797515,61797862,61797873,61798604,61798724,61799198,61799840,61802049,61802378,61802612,61805607,61805747,61806138,61807170,61811920,61812655,61812733,61813169,61813906,61814762,61816590,61817124,61819222,61819960,61820902,61821161,61822223,61822394,61823899,61824667,61826980,618…	17_61903445_G_C;17_61901197_T_A;	17_61904465_C_CG;17_61904337_TCCACTTCCAGTTTC_T;17_61898134_AC_A;17_61897799_CTGAGTGGAAAGGACATCTGTCTAATATCCAACATTCCAGGCTTTCTAAAGAAATTACCAGACTGGGCACGGTGGCTCACGCCTGTAATCCCTGCACTTTGGGAGGCTGAGGTGGGCAGATCACCTGAGGTCAGGAGTTTGACCAGCCTGGCCAACATGGTGAAACCCCATCTCTACTAAAAATACAAAAATTAGCTGGGCGTGGTGGTTGGCACCTGTAATCCCAGCTACTCAGAAGGCTGACTCAAGCGATTCAAGGAGAATCAGGCTGCAGTGAGCCAAGATCGTGCCATTGCACTCCAGCCTGGGCAACAGAGCGAGAC…	17_61904465_C_CG;17_61904465_C_G;17_61901439_T_C;17_61897799_CTGAGTGGAAAGGACATCTGTCTAATATCCAACATTCCAGGCTTTCTAAAGAAATTACCAGACTGGGCACGGTGGCTCACGCCTGTAATCCCTGCACTTTGGGAGGCTGAGGTGGGCAGATCACCTGAGGTCAGGAGTTTGACCAGCCTGGCCAACATGGTGAAACCCCATCTCTACTAAAAATACAAAAATTAGCTGGGCGTGGTGGTTGGCACCTGTAATCCCAGCTACTCAGAAGGCTGACTCAAGCGATTCAAGGAGAATCAGGCTGCAGTGAGCCAAGATCGTGCCATTGCACTCCAGCCTGGGCAACAGAGCGAGACTCCATCTCAAAAACA…	17_61904728_G_A;17_61904724_T_C;17_61904546_A_G;17_61904465_C_CG;17_61904465_C_G;17_61904337_TCCACTTCCAGTTTC_T;17_61896814_C_T;	17_61904465_C_CG;17_61904465_C_G;17_61904337_TCCACTTCCAGTTTC_T;17_61902822_C_G;17_61901657_A_G;17_61901641_T_C;17_61901439_T_C;17_61898135_C_A;17_61898134_AC_A;17_61897799_CTGAGTGGAAAGGACATCTGTCTAATATCCAACATTCCAGGCTTTCTAAAGAAATTACCAGACTGGGCACGGTGGCTCACGCCTGTAATCCCTGCACTTTGGGAGGCTGAGGTGGGCAGATCACCTGAGGTCAGGAGTTTGACCAGCCTGGCCAACATGGTGAAACCCCATCTCTACTAAAAATACAAAAATTAGCTGGGCGTGGTGGTTGGCACCTGTAATCCCAG…			0.361386139	True	True	True	True	True	False	28.0	30.0	17_61834981	rs7212196	Self-reported math ability (MTAG)	2.00E-08	Astle-W_hct_EUR_2017;Astle-W_pct_EUR_2017;GIANT_BMI-M-GT-50_EUR_2015;GIANT_BMI-adjusted-PA_EUR_2017;GIANT_BMI-adjusted-Smoking_EUR_2017;GIANT_Height-F_EUR_2013;GIANT_Height-M_EUR_2013;GIANT_Height-Tails_EUR_2013;GIANT_Height_AFR_2017;GIANT_HipadjBMI_Mixed_2015;GIANT_Obesity-C1_EUR_2013;GIANT_WHR-F_Mixed_2015;GIANT_WHR_EUR_2015	0.999986003	0.0	48	1.0699999999999988e-105
ENSG00000109265	KIAA1211	Q6ZU35	Q6ZU35	4_56916879_A_G	rs2702332	9.63e-05	1.76e-06	1	9.11e-11	0.632887754	4.870000000000001e-09	0.685125477	4.83e-26	0.621646293	4.39e-26	0.622902269	True	202	3662654.655	0.207647074	12	0.3624968320000001	False	56916879,56912111,56914418,56915121,56916573,56916925,56916926,56917258,56917315,56917614,56917693,56919842,56920667,56921178,56921498,56921614,56923039,56924685,56925572,56926206,56926517,56927056,56927194,56927413,56927511,56928913,56928946,56932664,56934093,56935796,56939138,56939190,56939240,56939472,56939533,56939544,56939762,56939951,56940009,56940203,56940302,56940420,56940792,56940941,569…								0.353960396	False	False	False	False	False	False	12.0	12.0								13	2.28e-16
ENSG00000109323	MANBA	O00462	O00462	4_103607635_G_A	rs227284	1.89e-08	1.29e-10	1	2.69e-13	-0.726987452	5.73e-14	-0.788539313	3.5499999999999995e-29	-0.800142701	2.5999999999999998e-27	-0.90789128	True	202	13253457.16	0.196787163	23	0.14124541599999998	False	103607635,103603949,103605916,103606672,103606872,103606886,103607253,103607806,103608308,103609793,103610248,103610310,103610872,103611364,103611533,103612018,103612043,103612137,103612917,103613266,103613299,103625183,103625590,103626859,103627874,103627968,103632963,103633815,103633894,103634220,103635183					4_103635183_T_C;4_103634220_C_T;4_103633894_T_C;4_103633815_G_A;4_103632963_C_T;4_103627968_T_C;4_103627874_A_G;4_103626859_T_C;4_103625590_C_T;4_103625183_T_C;4_103613299_A_G;4_103613266_A_G;4_103612917_T_C;4_103612137_G_A;4_103612043_T_C;4_103612018_G_T;4_103611533_A_T;4_103611364_G_A;4_103610872_A_G;4_103610310_T_A;4_103610248_C_T;4_103609793_T_A;4_103608308_C_T;4_103607806_C_T;4_103607253_C_G…			0.349009901	False	False	False	True	False	False	23.0	23.0	4_103612043	rs227370	Blood protein levels	8.00E-113	Astle-W_lymph-p_EUR_2017;Astle-W_mono-p_EUR_2017;Astle-W_neut-p_EUR_2017;CKDGen_eGFRcrea-NDM_EUR_2016;CKDGen_eGFRcrea_EUR_2016;Ferreira-M_Allergic-Disease_EUR_2017;GIANT_BMI-F-LE-50_EUR_2015;Ji-S_PSC_EUR_2017;MAGIC_FG-METABO_EUR_2012	1.455511	7.38e-06	5	8.879999999999998e-35
ENSG00000109606	DHX15	O43143	O43143	4_24454550_C_G	rs10025734	0.099030341	0.007557975	1	4.71e-05	0.42658052	0.023500129	0.595767707	0.7086879309999999	0.143018327	0.911336983	-0.006211451999999999	False	202	147597824.5	0.090533058	40	0.137644378	True	24454550								0.163366337	False	False	False	False	False	False	27.0	40.0								0
ENSG00000109814	UGDH	O60701	O60701	4_39504305_C_A	rs7667766	9.72e-05	8.93e-07	2	8.66e-12	0.376786193	5.24e-06	0.452398821	3.48e-06	0.279523135	1.6800000000000004e-09	0.489714223	True	202	63715906.21	0.134053771	29	0.101615151	False	39504305					4_39504305_C_A;			0.361386139	False	False	False	True	False	False	26.0	29.0								2	5.85e-12
ENSG00000109861	CTSC	P53634	P53634	11_87937521_A_G	rs4393315	0.007090261	0.000274558	1	5.51e-07	-0.519260132	4.72e-05	-0.417108462	1.32e-07	-0.525564155	1.95e-09	-0.677467197	True	202	34982133.46	0.15721062	13	0.119280069	False	87937521								0.15099009900000002	False	False	False	False	False	False	13.0	13.0								0
ENSG00000109919	MTCH2	Q9Y6C9	Q9Y6C9	11_47454972_C_G	rs2868459	0.004327677	7.4e-05	2	2.62e-07	0.428281976	0.000181137	0.35197914	6.09e-06	0.537926251	0.003341848	0.222199817	True	202	21436189.46	0.161480738	15	0.199819455	False	47454972,47372377,47374998,47375193,47375452,47376363,47376448,47377526,47377893,47378072,47378434,47378476,47379127,47379212,47379407,47379615,47379646,47379840,47380061,47382426,47383275,47383457,47384483,47384597,47385194,47385923,47386073,47387213,47387599,47389223,47389676,47390692,47391039,47391745,47391879,47392114,47393303,47393638,47394338,47395240,47397353,47397714,47398963,47401058,474…	11_47640429_G_C;	11_47650138_AT_A;			11_47663049_A_G;11_47658314_C_T;11_47655752_C_T;11_47650138_AT_A;11_47648042_G_A;11_47643891_T_A;			0.334158416	False	True	True	True	False	False	9.0	14.0	11_47393638;11_47475189;11_47606483;11_47606483;11_47606483;11_47640429;11_47648042;11_47663049	rs4992357;rs35184771;rs11605348;rs11605348;rs11605348;rs1064608;rs4752856;rs10838738	General cognitive ability;Feeling lonely;Intelligence;Loneliness;Loneliness (MTAG);Cognitive performance;Worry;Body mass index		GIANT_BMI-Active_EUR_2017;GIANT_BMI-F-LE-50_EUR_2015;GIANT_BMI-F_Mixed_2015;GIANT_BMI-M-GT-50_EUR_2015;GIANT_BMI-M_Mixed_2015;GIANT_BMI-Non-smokers-M_Mixed_2017;GIANT_BMI-Non-smokers_EUR_2017;GIANT_BMI-adjusted-PA-F_Mixed_2017;GIANT_BMI-adjusted-PA-M_Mixed_2017;GIANT_BMI-adjusted-PA_EUR_2017;GIANT_BMI-adjusted-Smoking-M_Mixed_2017;GIANT_BMI-adjusted-Smoking_EUR_2017;GIANT_BMI_EUR_2018;GIANT_Heigh…	1.0	0.0136056	13	1.12e-21
ENSG00000110002	VWA5A	O00534	O00534	11_124016820_A_G	rs3824997	0.0006604110000000001	1.63e-05	1	1.4e-09	0.496137442	3.06e-06	0.571695493	8.52e-18	0.646831784	7.66e-11	0.527259162	True	202	18345986.4	0.18015782	26	0.160415354	False	124016820				11_124016820_A_G;				0.413366337	True	False	False	False	False	False	26.0	26.0								1	7.36e-08
ENSG00000110063	DCPS	Q96C86	Q96C86	11_126125154_C_T	rs11220426	0.002398429	7.070000000000001e-05	1	1.08e-07	-0.5694511210000001	0.002372413	-0.586749869	2.05e-06	-0.694845183	2.85e-05	-0.523471045	True	202	15588691.86	0.152193886	11	0.158527238	False	126125154,126110318,126110978,126111094,126111293,126112575,126114025,126116652,126129382,126133576,126133587,126133632,126135139,126135785,126137854,126138381,126142471,126144411,126148160,126148192,126152647,126152910,126153875,126154107,126155202,126155917,126160006,126179197,126179774,126180238,126180322,126180370,126181471,126196537					11_126196537_G_A;11_126181471_C_A;11_126180370_T_G;11_126180322_C_T;11_126180238_G_A;11_126179774_T_C;11_126179197_G_A;			0.08663366300000001	False	False	False	True	False	False	10.0	10.0								8	9.57e-13
ENSG00000110074	FOXRED1	Q96CU9	Q96CU9	11_126149651_C_G	rs672908	4.19e-10	1.48e-12	1	3.98e-16	0.836062905	2.78e-12	0.806223826	2.56e-33	1.049628767	7.13e-36	0.996452999	True	202	6073891.202000001	0.16285582199999998	14	0.145437752	False	126149651,126069841,126070614,126071398,126072688,126075219,126076824,126078501,126080757,126081336,126083337,126085031,126086768,126087038,126091557,126093098,126093217,126095567,126095747,126099387,126103368,126111520,126114630,126129103,126130232,126134698,126139100,126139313,126140354,126140468,126141134,126148432,126151761,126153179,126161490,126163124,126163691,126164349,126166577,126167135…		11_126141134_A_AAAGG;	11_126139313_T_A;	11_126139100_T_C;	11_126141134_A_AAAGG;11_126140468_A_G;11_126140354_G_A;11_126139313_T_A;	11_126141134_A_AAAGG;11_126140468_A_G;11_126140354_G_A;11_126139313_T_A;11_126139100_T_C;		0.237623762	True	True	False	True	True	False	13.0	14.0								46	2.549999999999998e-81
ENSG00000110274	CEP164	Q9UPV0-2	Q9UPV0-2	11_117078679_G_A		0.099977314	0.007653654	1	3.1e-05	-0.6772444259999999	0.012217879	-0.836957765	2.150795174	-0.184637988	0.143331232	-0.147017571	False	185	1695030.2240000004	0.28176300600000004	4	0.379076141	True	117078679								0.108910891	False	False	False	False	False	False	4.0	4.0								0
ENSG00000110435	PDHX	O00330-3	O00330-3	11_34967328_A_G	rs11032943	0.001615708	4.46e-05	1	2.13e-08	0.430011982	0.00012482299999999998	0.38323418	7.19e-06	0.371562655	1.06e-06	0.33990196	True	202	15649745.99	0.119641708	17	0.17668214699999998	False	3,496,732,834,886,890,000,000,000,000,000,000,000,000,000,000,000,000,000,000,000,000					11_34967328_A_G;			0.388613861	False	False	False	True	False	False	15.0	17.0								17	2.3599999999999998e-18
ENSG00000110719	TCIRG1	Q13488	Q13488	11_67795299_G_A	rs308341	0.01303893	0.00056472	1	3.25e-07	-0.501515697	0.010156858	-0.469074862	0.282040555	-0.171852105	0.584859629	-0.034435297000000004	False	193	1194204.07	0.272065879	7	0.328207559	False	6,779,529,967,790,240,000,000,000,000,000,000,000,000								0.282178218	False	False	False	False	False	False	5.0	7.0								3	8.27e-09
ENSG00000110756	HPS5	Q9UPZ3-2	Q9UPZ3-2	11_18302805_T_A		0.025563985	0.001313659	1	7.040000000000002e-07	-0.748835343	0.000517922	-0.688715524	2.11e-07	-0.7065172809999999	3.5200000000000007e-09	-0.803528985	True	202	2002999.361	0.143700603	15	0.170395751	True	18302805,18301915,18308612,18309714,18310143,18310745,18311126,18311701,18315475,18316313,18316420,18316429,18318287,18319180,18319279,18320152,18320700,18323296,18324097,18324289,18325339,18325553,18326056,18326196,18326709,18326712,18327248,18327348,18327425,18327476,18327648,18328426,18331628,18332724,18333247,18340500,18343694,18353439,18355907,18365850,18367619,18370347,18377213,18378883,183…	11_18319180_G_T;	11_18315475_A_AC;11_18310143_TA_T;11_18309714_TAAA_T;		11_18343694_G_T;11_18318287_G_A;	11_18333247_G_A;11_18332724_C_A;11_18331628_A_G;11_18328426_A_G;11_18327648_T_G;11_18327425_C_T;11_18327348_T_C;11_18327248_C_T;11_18326712_G_A;11_18326709_G_C;11_18326196_C_G;11_18326056_G_A;11_18325553_A_G;11_18325339_T_A;11_18324289_T_C;11_18324097_T_C;11_18323296_A_G;11_18320700_G_A;11_18320152_G_T;11_18319279_G_T;11_18318287_G_A;11_18316429_G_A;11_18316420_T_C;11_18316313_C_T;11_18315475_A_A…			0.113861386	True	True	True	True	False	False	14.0	14.0								6	1.3300000000000002e-16
ENSG00000110811	LEPREL2	Q8IVL6	Q8IVL6	12_6741816_T_C	rs4376959	0.00486011	0.000171808	1	2.4300000000000003e-08	-1.421569411	0.007814966	-0.587389535	0.011455337	-0.10516529	0.294656283	0.15031259	False	202	527713.6115	0.300299213	3	0.304374865	False	6741816								0.056930693	False	False	False	False	False	False	1.0	1.0								0
ENSG00000111144	LTA4H	P09960	P09960	12_96428778_G_T	rs74457637	0.061142708	0.003993636	1	1.94e-06	-0.436828159	0.047001309000000005	-0.3781023120000001	5.03e-15	-1.05340387	0.004265368	-0.317888285	True	202	111258944.8	0.118488825	33	0.099931293	False	###############################################################################################################################################################################################################################################################		12_96431539_T_TCGG;12_96429889_GT_G;12_96429437_CT_C;12_96417100_T_TAT;		12_96429437_CT_C;12_96429377_G_A;	12_96433422_G_A;12_96432173_C_T;12_96431636_G_T;12_96431539_T_TCGG;12_96431320_C_G;12_96430891_A_T;12_96430863_A_T;12_96429889_GT_G;12_96429437_CT_C;12_96429377_G_A;12_96427293_C_T;12_96420953_T_C;12_96419941_G_A;12_96419455_A_G;12_96417199_G_A;12_96417100_T_TAT;12_96414337_A_G;12_96413768_A_G;12_96413683_T_G;12_96411828_T_A;12_96407086_A_G;12_96405906_A_G;12_96403610_T_C;12_96398171_T_G;12_96396…	12_96429377_G_A;12_96427293_C_T;12_96420953_T_C;12_96419941_G_A;12_96419455_A_G;12_96417199_G_A;12_96417100_T_TAT;12_96414337_A_G;12_96413768_A_G;12_96413683_T_G;12_96411828_T_A;12_96407086_A_G;12_96405906_A_G;12_96403610_T_C;12_96398171_T_G;12_96428778_G_T;		0.081683168	True	True	False	True	False	False	25.0	31.0								10	4.7e-22
ENSG00000111364	DDX55	Q8NHQ9	Q8NHQ9	12_124105328_T_C	rs3190835	3.04e-05	4.91e-07	1	8.690000000000002e-10	-0.54377441	0.000143846	-0.447024758	4.3e-13	-0.587211776	4.4000000000000005e-16	-0.622185627	True	202	7893964.51	0.119866775	19	0.138397625	False	124105328				12_124105328_T_C;				0.287128713	True	False	False	False	False	False	19.0	19.0					EGGC_Puberty-Growth-10-F-12-M_EUR_2013	0.374254		8	5.63e-14
ENSG00000111530	CAND1	Q86VP6	Q86VP6	12_67657807_A_G	rs710626	0.004570723	7.900000000000001e-05	2	6.84e-07	-0.250658637	1.19e-05	-0.309417856	0.000847713	-0.270128762	9.699999999999999e-06	-0.17014126100000002	True	202	190074666.2	0.108071163	63	0.111356594	True	67657807,67643840,67644730,67647688,67647690,67648680,67649137,67651838,67652285,67654314,67655047,67655212,67658509,67664163,67666985,67668097,67670243,67670531,67671666,67671926,67672026,67673172,67679505,67682551,67682618,67684119,67685593,67685907,67686232,67688413,67689927,67690435,67692150,67696721,67697634,67703186,67706466,67707441,67710482,67710907,67716251,67716495,67716553,67718632,677…		12_67689927_TA_T;		12_67710907_A_G;12_67710482_T_C;12_67707441_A_G;	12_67703186_C_T;12_67697634_T_C;12_67696721_G_C;12_67692150_G_T;12_67690435_G_A;12_67689927_TA_T;12_67688413_A_G;12_67686232_T_C;12_67685907_G_A;12_67685593_G_T;12_67684119_C_T;12_67682618_G_A;12_67682551_C_A;12_67679505_G_A;12_67673172_C_G;12_67672026_C_T;12_67671926_T_C;12_67671666_G_T;12_67670531_G_A;12_67670243_T_G;12_67668097_G_C;12_67666985_T_C;12_67664163_A_C;	12_67703186_C_T;12_67697634_T_C;12_67696721_G_C;12_67692150_G_T;12_67690435_G_A;12_67689927_TA_T;	12_67706466_G_A;	0.467821782	True	True	False	True	False	True	49.0	63.0								16	4.9000000000000003e-32
ENSG00000111602	TIMELESS	Q9UNS1-2	Q9UNS1-2	12_56829395_G_A	rs11171848	0.036941547000000005	0.00205399	1	2.81e-05	0.314590134	0.000143268	0.4557730820000001	1.4599999999999998e-19	0.488380971	8.9e-25	0.748526831	True	202	15422658.66	0.112848696	31	0.114443417	False	56829395,56814570,56814653,56815922,56821408,56821998,56822378,56823622,56824192,56824207,56824948,56825070,56825311,56825737,56825749,56825779,56825788,56825808,56825810,56825981,56826534,56826572,56827694,56828235,56828293,56828548,56828620,56828818,56828870,56829092,56829151,56829336,56829410,56829539,56829600,56829699,56829737,56830110,56831105,56831182,56831205,56832047,56832857,56833224,568…	12_56822378_T_A;12_56815922_C_T;12_56814653_G_A;	12_56834774_TTG_T;12_56831205_CT_C;12_56828620_GC_G;12_56826572_CA_C;12_56824948_GC_G;			12_56834774_TTG_T;12_56833873_A_G;12_56833751_A_T;12_56833224_C_T;12_56832857_G_A;12_56832047_A_T;12_56831205_CT_C;12_56831182_A_G;12_56831105_T_C;12_56830110_T_C;12_56829737_C_T;12_56829699_T_C;12_56829600_A_G;12_56829539_T_C;12_56829410_A_C;12_56829336_G_A;12_56829151_A_G;12_56829092_T_C;12_56828870_G_T;12_56828818_G_T;12_56828620_G_T;12_56828620_GC_G;12_56828548_G_C;12_56828293_A_G;12_56828235…		12_56827694_C_G;12_56825311_C_T;	0.448019802	False	True	True	True	False	True	27.0	30.0								1	4.5e-05
ENSG00000111696	NT5DC3	Q86UY8	Q86UY8	12_104387477_A_G	rs116993466	0.007613144	0.000298878	1	6.65e-08	-0.976706244	0.002827974	-1.239743482	0.00060456	-0.055623941	0.8921869920000001	-0.019251883	True	202	4032143.9460000005	0.228885738	13	0.502620289	False	104387477								0.081683168	False	False	False	False	False	False	8.0	8.0								0
ENSG00000111725	PRKAB1	Q9Y478	Q9Y478	12_120054587_C_T	rs11064849	0.05881928400000001	0.003759257	1	3.24e-05	0.316437913	0.083014636	0.540915174	0.001010252	0.205706557	0.022484756	0.164089953	True	202	2761336.385	0.17972091899999998	9	0.193479552	False	120054587,120035536,120039222,120039534,120041033,120041108,120041481,120041889,120042390,120042506,120050640,120050873,120051929,120052469,120052517,120053730,120054073,120054097,120054151,120054297,120054781,120055145,120055357,120055409,120055530,120055786,120056478,120056619,120056897,120058154,120068852,120070106,120081434,120086737,120094699,120095319,120095686,120095932,120096227,120097006…				12_120105740_C_A;	12_120117279_A_C;12_120113622_A_G;12_120113443_G_T;12_120111173_A_G;12_120109014_A_G;	12_120109014_A_G;		0.284653465	True	False	False	True	False	False	7.0	9.0								5	1.7100000000000006e-21
ENSG00000111802	TDP2	O95551	O95551	6_24653376_G_A		1.17e-06	1.27e-08	1	3.05e-14	0.663912599	3.99e-07	0.560814033	6.81e-17	0.699275665	6.55e-25	0.843043027	True	202	6949807.7579999985	0.103362113	10	0.202956486	False	24653376,24652003,24657482,24661511,24667205,24669472,24669786,24669945,24673609,24675324,24681411,24681655,24681732,24682541,24682891,24684777,24684796,24684819,24685021,24686291,24687765,24687999,24688849,24688958,24688983,24689311,24689312,24690001,24691027		6_24667205_T_TCC;		6_24667205_T_TCC;6_24667205_T_C;	6_24661511_T_C;6_24657482_C_G;6_24652003_T_C;		6_24653376_G_A;	0.282178218	True	True	False	True	False	True	8.0	10.0								6	1.27e-18
ENSG00000111846	GCNT2	Q8N0V5-2	Q8N0V5-2	6_10557924_A_G		0.028427387	0.0007570210000000001	2	3.44e-07	0.514070128	0.000521485	0.767443763	1.01e-17	0.537344598	1.36e-09	0.41248111	True	202	2297748.111	0.214016855	10	0.202648828	False	105,579,241,055,528,000,000,000,000,000,000,000,000,000,000,000,000,000,000,000,000,000,000,000		6_10563643_AC_A;6_10563642_GA_G;6_10562387_GT_G;6_10562386_TG_T;6_10562252_CA_C;6_10562251_TC_T;6_10560532_AG_A;6_10560531_CA_C;6_10560352_CA_C;6_10560351_TC_T;6_10557726_CT_C;6_10557725_TC_T;6_10557722_TGTTC_T;6_10555981_GG_G;6_10555289_TG_T;6_10555288_AT_A;6_10557924_AT_A;6_10557923_TA_T;			6_10563643_AC_A;6_10563643_A_G;6_10563642_GA_G;6_10562387_GT_G;6_10562387_G_A;6_10562386_TG_T;6_10562252_CA_C;6_10562252_C_G;6_10562251_TC_T;6_10560532_AG_A;6_10560531_CA_C;6_10560352_CA_C;6_10560352_C_T;6_10560351_TC_T;6_10557726_CT_C;6_10557725_TC_T;6_10557722_TGTTC_T;6_10555982_G_T;6_10555981_GG_G;6_10555289_TG_T;6_10555289_T_C;6_10555288_AT_A;6_10557924_AT_A;6_10557924_A_G;6_10557923_TA_T;			0.25990099	False	True	False	True	False	False	10.0	10.0								1	6.13e-14
ENSG00000111906	HDDC2	Q7Z4H3	Q7Z4H3	6_125614121_C_A		0.050643616	0.0030351790000000003	1	8.73e-06	-0.344161796	0.003521024	-0.569066072	1.59e-08	-0.7414905209999999	1.94e-06	-0.299582957	True	202	5904332.562000001	0.200460868	9	0.360821775	False	125614121,125590397,125590510,125590902,125591008,125592088,125592794,125593468,125593542,125593782,125594066,125594155,125594657,125595438,125595904,125596750,125597023,125597247,125597433,125597549,125597827,125598200,125599092,125600069,125600845,125601184,125601409,125601450,125601488,125601789,125602085,125602539,125603001,125603284,125603769,125603875,125604126,125604913,125604961,125607559…		6_125622049_ATT_A;6_125618754_TC_T;6_125601488_AT_A;6_125597393_CAAAGCAAAAGAACAGGGAAAAATACATTCCCATATTGACAAGAGAGTATATTCATTTCCCCAGCTTGATCCCAGGGTTCACTGGGGGCTCTAGTCTACGATCTGACCCACACTTCATTCCAAAGCAGAAAGAGATTCCAGGTCCTGGGAAGGGGCTGAAGGGGACCACTTGGCATTTACGCTCTGTCACCCCAGGTGCAACTGAGAATAAGGATGAGACTCAGGCAAGGAATCATCAATTAGGCAGAGGTAGGGGAAACTTCACCAGGCTCCTCAGTGCCTCTACCAGGAACTATGGGAAAACTCAGGTGTGAGAGCCCAGAAAGCTGAAGACA…	6_125597393_CAAAGCAAAAGAACAGGGAAAAATACATTCCCATATTGACAAGAGAGTATATTCATTTCCCCAGCTTGATCCCAGGGTTCACTGGGGGCTCTAGTCTACGATCTGACCCACACTTCATTCCAAAGCAGAAAGAGATTCCAGGTCCTGGGAAGGGGCTGAAGGGGACCACTTGGCATTTACGCTCTGTCACCCCAGGTGCAACTGAGAATAAGGATGAGACTCAGGCAAGGAATCATCAATTAGGCAGAGGTAGGGGAAACTTCACCAGGCTCCTCAGTGCCTCTACCAGGAACTATGGGAAAACTCAGGTGTGAGAGCCCAGAAAGCTGAAGACAATCTCTGCCCATTCCAAACCTGCAATTAAGTAAGGAGAATGAAGCACCTATA…	6_125623185_A_T;6_125597393_CAAAGCAAAAGAACAGGGAAAAATACATTCCCATATTGACAAGAGAGTATATTCATTTCCCCAGCTTGATCCCAGGGTTCACTGGGGGCTCTAGTCTACGATCTGACCCACACTTCATTCCAAAGCAGAAAGAGATTCCAGGTCCTGGGAAGGGGCTGAAGGGGACCACTTGGCATTTACGCTCTGTCACCCCAGGTGCAACTGAGAATAAGGATGAGACTCAGGCAAGGAATCATCAATTAGGCAGAGGTAGGGGAAACTTCACCAGGCTCCTCAGTGCCTCTACCAGGAACTATGGGAAAACTCAGGTGTGAGAGCCCAGAAAGCTGAAGACAATCTCTGCCCATTCCAAACCTGCAATTAAGTAAGGA…	6_125622873_T_G;6_125622832_A_G;6_125622737_T_G;6_125622049_ATT_A;6_125621920_C_T;6_125621645_C_T;6_125621618_A_G;6_125621179_C_T;6_125620878_T_C;6_125620444_A_G;6_125618761_C_G;6_125618754_TC_T;6_125618558_C_A;6_125616961_T_C;6_125616020_G_C;6_125615408_A_G;6_125615257_C_T;6_125614455_G_C;6_125614421_T_C;6_125614100_C_A;6_125613575_G_A;6_125612485_T_C;6_125612096_A_G;6_125612068_G_A;6_125611639_…	6_125622873_T_G;6_125622832_A_G;6_125622737_T_G;6_125622049_ATT_A;6_125621920_C_T;6_125621645_C_T;6_125621618_A_G;6_125621179_C_T;6_125620878_T_C;6_125620444_A_G;6_125618761_C_G;6_125618754_TC_T;6_125618558_C_A;6_125616961_T_C;6_125616020_G_C;6_125615408_A_G;6_125615257_C_T;6_125614455_G_C;6_125614421_T_C;6_125614100_C_A;6_125613575_G_A;6_125612485_T_C;6_125612096_A_G;6_125612068_G_A;6_125611639_…		0.180693069	True	True	False	True	True	False	9.0	9.0	6_125622737	rs112982980	Red blood cell count					32	3.1199999999999997e-47
ENSG00000111913	FAM65B	Q9Y4F9	Q9Y4F9	6_24979164_T_A		2.02e-05	1.55e-07	2	1.92e-12	0.739541558	1.03e-11	0.892254275	6.97e-26	0.907843891	2.21e-23	0.8694866859999999	True	202	2301497.173	0.398320944	11	0.459501951	False	249,791,642,495,713,000,000,000,000,000,000,000,000,000,000,000,000,000,000,000,000,000,000,000,000,000,000,000,000,000,000,000		6_24972107_TGTCAAATTCTTCAACTATA_T;			6_24981223_T_C;6_24976739_G_C;6_24972107_TGTCAAATTCTTCAACTATA_T;6_24972107_T_C;6_24967294_C_G;6_24965782_G_A;6_24963404_C_T;6_24960647_C_T;6_24959210_C_T;6_24958935_G_T;6_24957131_G_A;6_24979164_T_A;			0.410891089	False	True	False	True	False	False	11.0	11.0								1	6.08e-06
ENSG00000112297	AIM1	A0A0J9YWL0	A0A0J9YWL0	6_106709856_A_C		0.02113233	0.001031509	1	2.84e-07	0.727721214	0.003131922	0.89842814	0.000858838	0.399286662	0.000110908	0.439195823	True	202	8113118.164	0.181010943	22	0.143777115	False	106709856,106629713,106637217,106654543,106665523,106668305,106669139,106670087,106677116,106684453,106697392,106700148,106703618,106704927,106708813,106710190,106710431,106712630,106717653,106718702,106726379,106734183,106736013,106739375,106740638,106743135,106746433,106748211,106751948,106753653,106763656,106767627								0.096534653	False	False	False	False	False	False	18.0	19.0								0
ENSG00000112304	ACOT13	Q9NPJ3	Q9NPJ3	6_24669786_T_A		3.81e-10	1.29e-12	1	1.85e-19	0.958046674	2.8699999999999997e-17	0.937704697	9.55e-33	1.18437868	1e-33	1.040581235	True	202	18724420.53	0.230509638	5	0.252236089	False	###############################################################################################################################################################################################################################################################		6_24688957_AA_A;6_24684777_A_ACCAGAAATACAGAGTTTC;6_24681732_T_TA;6_24681411_CT_C;		6_24687765_A_G;	6_24691027_A_G;6_24690001_G_T;6_24689312_A_G;6_24689311_TA_CG;6_24689311_T_C;6_24689311_TA_CG;6_24688983_A_G;6_24688958_A_G;6_24688957_AA_A;6_24687999_T_C;6_24687765_A_G;6_24685021_A_G;6_24684819_A_T;6_24684796_C_T;6_24684777_A_ACCAGAAATACAGAGTTTC;6_24682891_T_C;6_24681732_T_TA;6_24681655_T_C;6_24681411_CT_C;6_24675324_A_G;6_24669945_T_C;6_24669472_C_G;6_24669786_T_A;			0.284653465	True	True	False	True	False	False	5.0	5.0	6_24654443	rs3181238	Serum alkaline phosphatase levels	1.00E-13				10	5.570000000000001e-17
ENSG00000112305	SMAP1	Q8IYB5-3	Q8IYB5-3	6_71599887_A_G		0.05473079	0.003408262	1	7.19e-06	-0.766568957	0.001989683	-0.6079173370000001	6.330000000000001e-05	-0.6481111970000001	0.0006831360000000001	-0.408635587	True	202	10519462.45	0.118907515	6	0.160585743	False	71599887								0.04950495	False	False	False	False	False	False	5.0	5.0								0
ENSG00000112667	DNPH1	H0Y8X4	H0Y8X4	6_43193281_A_G		0.004165569	0.000140429	1	1.48e-07	-0.52586525	0.00010123	-0.562344874	1.39e-17	-1.054110155	1.5e-21	-0.859889683	True	202	5031978.4169999985	0.248598604	7	0.212374058	False	43193281,43148052,43149778,43150589,43151186,43153484,43157020,43157222,43159128,43161133,43174785,43178234,43179655,43181379,43182497,43184275,43185563,43186138,43186775,43186794,43188173,43189645,43190230,43193877,43193947,43195827,43195899,43197900,43199378,43199730,43200203		6_43195827_CAAAT_C;			6_43195827_CAAAT_C;6_43193947_G_A;		6_43193877_G_A;	0.096534653	False	True	False	True	False	True	5.0	5.0								33	5.13e-46
ENSG00000112992	NNT	Q13423	Q13423	5_43617413_G_A	rs10074229	2.55e-05	4e-07	1	1.22e-11	0.695153537	2.32e-06	0.657374245	1.77e-10	0.6993520129999999	2.87e-19	0.944761766	True	202	28814283.49	0.197745562	31	0.141099843	False	43617413,43616702,43619961,43620582,43622444,43623453,43625827,43628669,43637233,43645292,43646456,43647709,43647964,43647996,43648697,43648914,43658051,43658483,43659571,43660416,43660535,43663640,43665342,43667010,43670374,43670749,43672081,43673924,43680667,43681293,43688199,43692295,43716446,43721168,43724452,43730908,43732921,43738311,43739894,43740532,43740638,43740925,43741302,43741591,437…		5_43692295_AT_A;5_43660535_CT_C;5_43623453_A_AGTT;			5_43692295_AT_A;5_43688199_C_T;5_43681293_T_C;5_43680667_A_G;5_43673924_T_C;5_43672081_A_G;5_43670749_G_C;5_43670374_A_T;5_43667010_A_G;5_43665342_A_T;5_43663640_G_A;5_43660535_CT_C;5_43659571_A_G;5_43658483_A_C;5_43658051_G_A;5_43648914_A_G;5_43648697_T_C;5_43647964_T_C;5_43647709_T_C;5_43646456_C_T;5_43645292_T_C;5_43637233_G_A;5_43628669_C_T;5_43625827_T_C;5_43623453_A_AGTT;5_43622444_A_C;5_43…			0.094059406	False	True	False	True	False	False	30.0	31.0								22	3.81e-26
ENSG00000113273	ARSB	P15848	P15848	5_78215595_T_A	rs7711919	0.0041164240000000005	0.000136845	1	2.47e-07	0.3553596470000001	0.00199437	0.353237556	8.37e-11	0.434991519	2.53e-11	0.537020206	True	202	4678681.751	0.200579871	11	0.133517332	False	7,821,559,578,205,760,000,000,000,000,000,000,000,000,000,000,000,000,000,000,000,000		5_78216504_TA_T;5_78216503_AT_A;			5_78216878_G_A;5_78216504_T_A;5_78216504_TA_T;5_78216503_AT_A;5_78211105_C_T;5_78210172_G_A;5_78207266_G_A;5_78207226_G_A;5_78205763_G_C;5_78215595_T_A;			0.462871287	False	True	False	True	False	False	10.0	11.0								0
ENSG00000113318	MSH3	P20585	P20585	5_79951133_T_C	rs375240461	0.001899526	5.47e-05	1	1.6300000000000002e-09	-0.6536496970000001	9.84e-05	-0.943675886	6.8400000000000006e-18	-0.504803986	4.27e-18	-0.627229248	True	202	19595683.84	0.098820832	43	0.114557632	True	79,951,133,799,501,600,000,000,000,000,000,000,000,000,000,000,000,000,000,000,000,000,000,000,000,000,000,000,000,000,000,000,000,000,000		5_79989417_AACAT_A;			5_80033835_A_G;5_80018244_A_G;5_79996632_A_G;5_79995570_T_G;5_79989417_AACAT_A;5_79985963_T_C;5_79985947_A_C;5_79976388_T_C;5_79964349_G_T;5_79961643_A_G;5_79960128_G_T;5_79951133_T_C;			0.438118812	False	True	False	True	False	False	41.0	43.0								3	1.6899999999999999e-18
ENSG00000113407	TARS	P26639	P26639	5_33438688_A_G	rs6450989	0.05159100900000002	0.003116114	1	1.07e-05	0.321897266	0.018729736	0.319196529	0.000172602	0.272741112	2.13e-05	0.323855682	True	202	164028318.8	0.16230618	45	0.119744638	False	3,343,868,833,415,170,000,000,000,000,000,000,000,000,000,000,000,000,000,000,000,000,000,000,000,000,000,000,000,000		5_33466738_A_AAAG;			5_33466738_A_G;5_33466738_A_AAAG;5_33457618_G_A;5_33450530_A_G;5_33448152_C_G;	5_33466738_A_G;5_33466738_A_AAAG;5_33457618_G_A;5_33450530_A_G;5_33448152_C_G;		0.366336634	False	True	False	True	False	False	39.0	45.0								0
ENSG00000113615	SEC24A	O95486	O95486	5_133896901_T_A	rs2589405	0.093378317	0.006950921999999999	1	0.00028221400000000003	-0.287693784	0.387432987	-0.317812274	0.027431374	-0.027754555	0.215293216	0.055251881	False	202	10728498.62	0.106249984	29	0.112414285	False	133,896,901,133,873,000,000,000,000,000,000,000,000,000,000,000,000,000,000,000,000								0.346534653	False	False	False	False	False	False	22.0	29.0								0
ENSG00000114021	NIT2	Q9NQR4	Q9NQR4	3_100074759_G_C	rs277647	0.012411628	0.000527382	1	3.15e-06	0.285173248	0.001019358	0.264680352	6.77e-05	0.348782613	3.65e-08	0.324584058	True	202	13727849.09	0.146048991	17	0.09774639	False	100,074,759,100,119,000,000,000,000,000,000,000,000,000,000				3_100074759_G_C;				0.356435644	True	False	False	False	False	False	15.0	17.0								3	1.51e-05
ENSG00000114450	GNB4	Q9HAV0	Q9HAV0	3_179169230_T_G	rs7611674	0.084240966	0.006101376	1	4.64e-05	-0.431757036	0.02118986	-0.440903032	4.69e-07	-0.277121517	4.28e-08	-0.27956995	True	202	4470282.25	0.193128402	7	0.165325102	False	179,169,230,179,172,000,000,000,000,000,000,000				3_179169230_T_G;				0.14603960400000002	True	False	False	False	False	False	7.0	7.0	3_179169230;3_179172979;3_179172979;3_179172979	rs7611674;rs7612445;rs7612445;rs7612445	Diastolic blood pressure;Atrial fibrillation;Heart rate;Resting heart rate		HRGene_HR_Mixed_2013;Nolte-I_RMSSD_EUR_2017;Nolte-I_SDNN_EUR_2017	5.03e-05		3	5.19e-38
ENSG00000114491	UMPS	P11172	P11172	3_124439567_A_G	rs332514	0.019439277	0.000928389	1	2.99e-06	-0.354136326	0.101802738	-0.70862388	2.5000000000000003e-12	-0.860787075	2.67e-08	-0.306527939	True	202	34769570.74	0.129104827	27	0.151504356	False	124439567,124438329,124446195,124446520,124446904,124447544,124447590,124447765,124447956,124448363,124449148,124450284,124450437,124450815,124451064,124451312,124452159,124453663,124454684,124455214,124455267,124456742,124457272,124457483,124458333,124461804,124462058,124462259,124462488,124462808,124463656,124463982,124465545,124465860,124465926,124465957,124466083,124466113,124466921,124470060…	3_124456742_G_C;	3_124463655_TAC_T;3_124462488_A_AAAAT;3_124462188_TAAATAAATAAATAGGGCGGGGCGCAGTAGCTCATGCCTGTAATCCCAGCACTTTGGGAGGCTGAGGCGGGCGGATCATGAGGTCAGGAGATCGAGACCATCCTGGCTAACACGGTGAAACTCCATCTCTACTAAAAAATACAAAAAATTAGCCAGGCGTGGTGGCAGGCGCCTGTAGTCCCAGCTACTCGGGAGGCTGAGGCAGGAGAATGGCATGAACCTGGGAGGCAGAGCTTGCAGTGAGCCGAGATAGCACCACTGCACTCCAGCCTGGGTGACAGAGCGAGACTCCGTCTCAAAA_T;3_124462188_TAAATAAATAAATAGGGCGGGGCGCAGTAGCTC…		3_124463982_G_T;3_124463656_A_T;3_124463655_TAC_T;3_124462808_C_T;3_124457272_C_T;3_124456742_G_C;3_124450437_ATCT_A;	3_124462488_A_AAAAT;3_124462188_TAAATAAATAAATAGGGCGGGGCGCAGTAGCTCATGCCTGTAATCCCAGCACTTTGGGAGGCTGAGGCGGGCGGATCATGAGGTCAGGAGATCGAGACCATCCTGGCTAACACGGTGAAACTCCATCTCTACTAAAAAATACAAAAAATTAGCCAGGCGTGGTGGCAGGCGCCTGTAGTCCCAGCTACTCGGGAGGCTGAGGCAGGAGAATGGCATGAACCTGGGAGGCAGAGCTTGCAGTGAGCCGAGATAGCACCACTGCACTCCAGCCTGGGTGACAGAGCGAGACTCCGTCTCAAAA_T;3_124462259_C_T;3_124462188_TAAATAAATAAATAGGGCGGGGCGCAGTAGCTCAT…	3_124462808_C_T;3_124462488_A_AAAAT;3_124462188_TAAATAAATAAATAGGGCGGGGCGCAGTAGCTCATGCCTGTAATCCCAGCACTTTGGGAGGCTGAGGCGGGCGGATCATGAGGTCAGGAGATCGAGACCATCCTGGCTAACACGGTGAAACTCCATCTCTACTAAAAAATACAAAAAATTAGCCAGGCGTGGTGGCAGGCGCCTGTAGTCCCAGCTACTCGGGAGGCTGAGGCAGGAGAATGGCATGAACCTGGGAGGCAGAGCTTGCAGTGAGCCGAGATAGCACCACTGCACTCCAGCCTGGGTGACAGAGCGAGACTCCGTCTCAAAA_T;3_124462259_C_T;3_124462188_TAAATAAATAAATAGGGCG…	3_124462808_C_T;	0.148514851	True	True	True	True	False	True	18.0	25.0								4	3.49e-09
ENSG00000114904	NEK4	P51957	P51957	3_52674667_C_T	rs11130310	0.000541326	1.29e-05	1	2.14e-08	-0.535457093	5.16e-08	-0.688017531	0.0077972519999999984	-0.184458974	0.406565519	-0.055283684000000013	True	202	2085183.634	0.176811455	11	0.219379857	False	52674667,52584715,52584787,52585760,52585990,52586682,52593119,52593138,52593230,52593962,52596173,52596398,52596914,52597664,52598540,52598608,52598668,52599789,52599922,52600064,52600999,52602274,52603352,52604180,52604861,52605005,52605136,52605943,52605974,52606292,52606366,52606857,52607682,52607685,52608949,52609157,52609362,52610415,52610651,52611413,52612159,52612178,52613656,52614670,526…	3_52797634_G_C;	3_52793987_G_GTC;3_52784800_TAA_T;3_52778051_C_CG;3_52774835_AT_A;3_52758570_T_TAA;3_52758569_A_AGA;3_52747623_CA_C;3_52747481_AAAAAT_A;		3_52802402_A_C;	3_52804487_T_C;3_52803205_T_C;3_52802402_A_C;3_52800731_A_G;3_52795224_A_T;3_52794367_T_G;3_52793987_G_GTC;3_52793602_C_T;3_52793239_A_G;3_52790213_T_C;3_52788959_A_G;3_52787603_T_C;3_52787242_C_T;3_52786913_C_T;3_52785168_A_C;3_52784800_TAA_T;3_52784416_C_T;3_52782839_C_T;3_52782274_T_G;3_52781539_T_G;3_52780509_A_T;3_52779801_T_C;3_52779591_C_T;3_52778347_T_C;3_52778051_C_CG;3_52778051_C_T;3_52…	3_52804487_T_C;3_52803205_T_C;3_52802402_A_C;3_52800731_A_G;3_52785168_A_C;3_52784800_TAA_T;3_52784416_C_T;3_52782839_C_T;3_52782274_T_G;3_52781539_T_G;3_52780509_A_T;	3_52802402_A_C;3_52800284_T_C;	0.396039604	True	True	True	True	False	True	11.0	11.0	3_52584715;3_52584787;3_52706724;3_52718280;3_52721305;3_52721305;3_52728804;3_52728804;3_52755592;3_52809525;3_52817675;3_52817778;3_52821011;3_52821011;3_52822921;3_52822921;3_52822921	rs2878628;rs2251219;rs12493107;rs10865974;rs11177;rs11177;rs6976;rs6976;rs11130319;rs2019065;rs3774354;rs3774355;rs1042779;rs1042779;rs2300149;rs2300149;rs2300149	Intelligence (MTAG);Major mood disorders;Blood protein levels;Bipolar disorder with mood-incongruent psychosis;Osteoarthritis;Osteoarthritis (hip);Osteoarthritis (hip);Osteoarthritis of the hip or knee;Body mass index;Blood protein levels;Osteoarthritis of the hip or knee;Osteoarthritis (hip);Bipolar disorder;Blood protein levels;Waist circumference adjusted for BMI (joint analysis main effects a…		Astle-W_hct_EUR_2017;Astle-W_hgb_EUR_2017;GIANT_BMI-adjusted-PA_EUR_2017;GIANT_BMI_EUR_2018;GIANT_Height-F_EUR_2013;GIANT_WCadjBMI_Mixed_2015;GIANT_WHR-Active-F_Mixed_2017;GIANT_WHR-Active_EUR_2017;GIANT_WHR-adjusted-PA-F_Mixed_2017;GIANT_WHR-adjusted-PA_EUR_2017;GIANT_WHR-adjusted-Smoking-F_Mixed_2017;GIANT_WHR-adjusted-Smoking_EUR_2017;GIANT_WHRadjBMI-F-GT-50_EUR_2015;GIANT_WHRadjBMI_Mixed_2015…	1.249494	9.99e-11	23	1.1599999999999999e-16
ENSG00000115129	TP53I3	Q53FA7	Q53FA7	2_24310967_T_C	rs71439112	0.002941861	9.02e-05	1	4.12e-07	-0.554493369	3.4e-05	-0.7149177290000001	0.001269537	-0.372202396	0.018031863	-0.213952136	True	202	9314039.591	0.189578773	17	0.223907025	False	24310967,24259352,24260145,24262060,24268142,24269628,24271980,24272396,24272657,24277104,24279144,24283483,24283853,24284116,24284606,24284749,24284891,24285088,24287598,24288713,24288897,24289121,24291080,24292353,24292597,24292735,24292813,24292870,24293467,24293891,24294538,24295030,24295194,24295715,24296100,24296606,24297264,24297527,24297751,24298464,24299534,24300232,24300563,24300740,243…	2_24300563_T_C;	2_24303902_CTGTGACAGAAAGTACAGGGTTCTCTTTACTTTGCAACTGCTACACATTCCCCACACAGGCATATTCTATCAAGATCACCTGGCCGTTGCACCAAATGCCAAATCAATCTTTTGCTTTTCCTTTTTTATTTGGTGGGGTGGGGGTGGGCTGGTGGGGGTGGGACGCTGTGACTCAAATACAAACCATCTTGTTCTTTGGAGAAAGAAAAAGAGCATATTGACGACCTTTTCTGTCTTATTGCCTCTGGCTAAAGTGGAAAACAGCCTTTTGAAACAGGGCTATAAGCAGCCACATCCATAATCTCTATTTTACCTATAACACCAAAATGCACATCTCTGACCTACACCTGAATAAGTAAGAACAACTACCATTCCCATGGTCACCACC…	2_24303902_CTGTGACAGAAAGTACAGGGTTCTCTTTACTTTGCAACTGCTACACATTCCCCACACAGGCATATTCTATCAAGATCACCTGGCCGTTGCACCAAATGCCAAATCAATCTTTTGCTTTTCCTTTTTTATTTGGTGGGGTGGGGGTGGGCTGGTGGGGGTGGGACGCTGTGACTCAAATACAAACCATCTTGTTCTTTGGAGAAAGAAAAAGAGCATATTGACGACCTTTTCTGTCTTATTGCCTCTGGCTAAAGTGGAAAACAGCCTTTTGAAACAGGGCTATAAGCAGCCACATCCATAATCTCTATTTTACCTATAACACCAAAATGCACATCTCTGACCTACACCTGAATAAGTAAGAACAACTACCATTCCCATGGTCACCACC…		2_24304686_T_C;2_24303902_CTGTGACAGAAAGTACAGGGTTCTCTTTACTTTGCAACTGCTACACATTCCCCACACAGGCATATTCTATCAAGATCACCTGGCCGTTGCACCAAATGCCAAATCAATCTTTTGCTTTTCCTTTTTTATTTGGTGGGGTGGGGGTGGGCTGGTGGGGGTGGGACGCTGTGACTCAAATACAAACCATCTTGTTCTTTGGAGAAAGAAAAAGAGCATATTGACGACCTTTTCTGTCTTATTGCCTCTGGCTAAAGTGGAAAACAGCCTTTTGAAACAGGGCTATAAGCAGCCACATCCATAATCTCTATTTTACCTATAACACCAAAATGCACATCTCTGACCTACACCTGAATAAGTAAGAACAACTACCATT…		2_24300563_T_C;	0.143564356	False	True	True	True	True	True	16.0	17.0								12	4.0799999999999996e-43
ENSG00000115306	SPTBN1	Q01082	Q01082	2_54688680_C_T	rs13034739	0.00545667	9.84e-05	2	3.9700000000000005e-08	-0.52855894	2.52e-10	-0.649829062	1.4e-07	-0.2270261160000001	2e-07	-0.284566457	True	202	482718308.1	0.118487983	148	0.078355975	False	54688680,54687254,54688234,54688236,54688864,54690227,54690658,54690676,54690939,54690948,54690964,54694130,54694540,54694645,54694811,54695084,54695247,54695401,54695457,54698065,54698645,54699021,54699067,54701379,54703048,54714119,54714362,54715052,54725033		2_54699067_AACTTC_A;2_54695457_TA_T;2_54694539_GCTG_G;2_54690227_TG_T;			2_54725033_G_A;2_54715052_C_T;2_54714362_T_A;2_54714119_G_A;2_54703048_C_G;2_54701379_C_A;2_54699067_AACTTC_A;2_54699021_T_C;2_54698645_A_G;2_54698065_T_G;2_54695457_TA_T;2_54695401_A_G;2_54695247_G_A;2_54695084_G_A;2_54694811_C_T;2_54694645_C_G;2_54694540_C_T;2_54694539_GCTG_G;2_54694130_C_G;2_54690964_T_A;2_54690948_C_A;2_54690939_G_A;2_54690676_A_C;2_54690658_C_T;2_54690227_TG_T;2_54688864_G_C…			0.20049505	False	True	False	True	False	False	136.0	148.0								8	5.639999999999999e-17
ENSG00000115339	GALNT3	Q14435	Q14435	2_166557510_A_G	rs1863196	4.85e-07	4.589999999999999e-09	1	7.72e-14	-0.628984461	8.64e-08	-0.59919202	4.01e-30	-0.7277688390000001	9.759999999999999e-32	-0.7319452409999999	True	202	2549884.463	0.281587331	11	0.240358984	False	166557510,166535918,166539042,166541127,166543023,166551494,166551752,166553600,166554037,166555552,166555672,166555888,166555944,166560046,166560451,166561432,166561945,166562447,166564112,166564299,166564362,166566005,166567403,166568023,166571303,166571946,166572906,166573776,166574200,166575483,166576386,166576956,166577489,166577874,166578114,166582031,166583141,166583244,166585566,166595015…				2_166605010_A_T;	2_166620636_C_G;2_166616667_A_G;2_166614779_G_A;2_166613243_G_T;2_166607746_T_C;2_166606993_G_T;2_166605927_A_C;2_166605800_A_G;	2_166620636_C_G;2_166616667_A_G;2_166614779_G_A;		0.467821782	True	False	False	True	False	False	11.0	11.0	2_166566005;2_166566005;2_166573776;2_166577489;2_166578114;2_166578114;2_166578114;2_166583244;2_166601046;2_166601046	rs34095745;rs34095745;rs35969972;rs7586085;rs6726821;rs6726821;rs6726821;rs6710518;rs1346004;rs1346004	Femoral neck bone mineral density;Lumbar spine bone mineral density;Total body bone mineral density (age 0-15);Total body bone mineral density;Bone mineral density (paediatric, total body less head);Bone mineral density (paediatric, upper limb);TB-LM or TBLH-BMD (pleiotropy);Bone mineral density;Bone mineral density;Bone mineral density (paediatric, lower limb)					20	1.49e-18
ENSG00000115425	PECR	Q9BY49	Q9BY49	2_216911062_G_A	rs12615604	0.003763011	0.000123684	1	2e-06	-0.927813974	2.9e-05	-0.897755455	0.536156544	-0.35198435	0.577823364	-0.091352857	False	193	6273376.656	0.129076716	12	0.22718902	False	216,911,062,216,912,000,000,000,000,000,000,000,000,000,000,000,000,000,000,000,000,000,000,000,000,000,000,000,000,000,000,000,000,000,000,000,000,000,000,000,000,000,000,000,000,000,000,000,000,000,000,000,000,000	2_216923679_C_T;	2_216925597_GA_G;2_216912479_CA_CT;			2_216928255_T_C;2_216927798_T_C;2_216927447_C_T;2_216927164_G_A;2_216926768_G_A;2_216926071_C_G;2_216925597_GA_G;2_216925262_A_G;2_216925202_G_C;2_216924971_C_T;2_216924967_C_T;2_216924147_T_C;2_216924139_T_A;2_216923679_C_T;2_216919393_T_C;2_216919087_T_C;2_216912479_CA_CT;2_216911062_G_A;	2_216928255_T_C;2_216927798_T_C;2_216927447_C_T;2_216927164_G_A;2_216926768_G_A;2_216926071_C_G;2_216925597_GA_G;2_216925262_A_G;2_216925202_G_C;2_216924971_C_T;2_216924967_C_T;2_216924147_T_C;2_216924139_T_A;2_216923679_C_T;2_216919393_T_C;2_216919087_T_C;2_216912479_CA_CT;2_216911062_G_A;		0.059405941	False	True	True	True	False	False	9.0	9.0								1	2.41e-06
ENSG00000115648	MLPH	Q9BV36	Q9BV36	2_238389739_G_A	rs73098849	0.028759144	0.001538444	1	2.02e-06	-0.647800822	0.002661318	-1.128516807	1.93e-16	-0.998319522	3.4e-21	-1.043581445	True	157	445735.6363	0.336941117	3	0.5461196939999999	False	238,389,739,238,384,000,000,000,000,000,000,000,000,000,000,000,000,000,000,000,000,000,000,000,000,000,000,000,000,000,000,000,000,000,000,000,000,000,000,000,000,000,000,000,000,000,000,000,000,000,000,000,000,000,000,000,000		2_238395789_T_TCCGCC;			2_238419959_T_C;2_238400702_G_A;2_238400645_G_A;2_238399130_C_T;2_238398826_G_T;2_238398580_T_C;2_238398268_T_C;2_238396741_G_A;2_238395789_T_TCCGCC;2_238395708_A_T;			0.168316832	False	True	False	True	False	False	3.0	3.0								3	1.34e-21
ENSG00000115808	STRN	O43815	O43815	2_37078839_A_G	rs3770781	1.13e-06	1.22e-08	1	6.469999999999999e-10	0.49624243	2.44e-07	0.511880349	7.18e-14	0.360694611	1.93e-14	0.465416523	True	202	22537345.81	0.098597134	30	0.101647556	True	37,078,839,370,660,100,000,000,000,000,000,000,000,000,000,000,000,000,000,000,000,000,000,000,000,000,000				2_37075013_T_A;	2_37102249_A_G;2_37097009_T_C;2_37095139_G_C;2_37079583_T_C;2_37078839_A_G;			0.430693069	True	False	False	True	False	False	27.0	30.0	2_37068428	rs711244	Mean platelet volume	8.00E-22	Astle-W_eo-p-gran_EUR_2017;Astle-W_hlr-p_EUR_2017;Astle-W_irf_EUR_2017;Astle-W_pdw_EUR_2017;Astle-W_plt_EUR_2017;Astle-W_ret-p_EUR_2017	0.17138820000000002	1.1899999999999987e-131	4	1.88e-10
ENSG00000115816	CEBPZ	Q03701	Q03701	2_37422076_C_T	rs149381909	0.000238933	5.01e-06	1	9.44e-09	-0.429981794	1.16e-05	-0.438951013	8.01e-12	-0.498893736	1.63e-11	-0.518835102	True	202	87351121.84	0.119939351	46	0.07500739599999999	False	37422076								0.388613861	False	False	False	False	False	False	43.0	45.0								0
ENSG00000116062	MSH6	C9J7Y7	C9J7Y7	2_47750419_C_T	rs11125142	0.06325302099999999	0.00210646	2	8.44e-06	-1.045927894	0.001142825	-0.986568523	0.174614302	-0.131385329	0.287188373	-0.055594153	False	52	40923.3703	0.301212354	1	0.298339085	False	47750419								0.462871287	False	False	False	False	False	False	1.0	1.0								0
ENSG00000116120	FARSB	Q9NSD9	Q9NSD9	2_223436402_C_T	rs3768973	0.0008433280000000001	2.11e-05	1	1.94e-09	0.5965239760000001	0.0007721869999999999	0.422200153	1.2099999999999998e-07	0.33435718600000003	9.14e-08	0.282145594	True	202	98168099.64	0.070616706	34	0.078825826	False	223,436,402,223,517,000,000,000,000,000,000,000,000,000,000,000,000,000,000,000,000,000,000,000,000,000,000,000,000,000,000,000,000,000,000,000,000,000,000				2_223436402_C_T;	2_223520287_C_T;2_223518452_C_T;2_223518151_A_G;2_223517705_C_G;			0.277227723	True	False	False	True	False	False	28.0	34.0								3	6.12e-10
ENSG00000116157	GPX7	Q96SL4	Q96SL4	1_53103888_G_T	rs11205985	0.000160585	3.12e-06	1	6.32e-07	0.567387859	0.004100388	0.813559189	9.74e-06	0.5126211970000001	6.790000000000001e-07	0.522237154	True	202	4493829.415	0.206432717	7	0.241831623	False	5,310,388,853,110,000								0.141089109	False	False	False	False	False	False	7.0	7.0								30	1.87e-23
ENSG00000116260	QSOX1	O00391	O00391	1_180124634_C_T	rs34430949	0.034106555	0.001878679	1	1.26e-05	-0.683355805	0.010908143	-0.82111487	8.02e-28	-0.988543479	2.0499999999999998e-30	-0.990896147	True	180	1248151.601	0.232271923	7	0.30490488	False	180,124,634,180,127,000					1_180127107_A_C;1_180124634_C_T;	1_180127107_A_C;1_180124634_C_T;		0.15099009900000002	False	False	False	True	False	False	6.0	7.0								7	2.9699999999999996e-62
ENSG00000116353	MECR	Q9BV79	Q9BV79	1_29596084_G_C	rs6687475	0.051058814	0.0030779920000000003	1	2.73e-06	-0.410664203	2.55e-07	-0.642402106	5.07e-10	-0.567638474	1.15e-11	-0.528580918	True	202	5602017.1839999985	0.17902359199999998	9	0.162506013	False	295,960,842,959,068,000,000,000								0.247524752	False	False	False	False	False	False	9.0	9.0								1	1.11e-06
ENSG00000116771	AGMAT	Q9BSE5	Q9BSE5	1_15905501_G_A	rs41270261	0.026819205	0.001390718	1	2.6e-07	-0.811633238	0.022528401	-0.813220422	1.11e-07	-0.464192946	2.07e-07	-0.5005681470000001	True	167	1082317.897	0.257406923	5	0.418535468	False	1,590,550,115,831,460,000,000,000,000,000,000,000,000							1_15905501_G_A;	0.116336634	False	False	False	False	False	True	4.0	4.0								2	9.63e-06
ENSG00000116774	OLFML3	Q9NRN5	Q9NRN5	1_114422976_T_A	rs1217383	0.05473079	0.003402473	1	5.13e-06	0.303569624	5.15e-05	0.35314801799999995	0.023076139	0.186749188	0.22978630100000005	0.066140983	False	202	2880714.251	0.383201345	13	0.228788174	False	114422976								0.252475248	False	False	False	False	False	False	13.0	13.0								0
ENSG00000116791	CRYZ	Q08257	Q08257	1_75199973_T_C	rs28602706	3.17e-18	1.86e-21	1	4.22e-24	-1.048452712	1.53e-20	-1.126521057	7.9e-27	-1.097363713	3.1100000000000004e-26	-1.120675825	True	202	31384781.27	0.438211565	17	0.247180328	False	###############################################################################################################################################################################################################################################################					1_75198345_G_A;1_75197614_G_T;1_75197283_G_T;1_75192338_C_G;1_75189847_T_C;			0.487623762	False	False	False	True	False	False	17.0	17.0	1_75224560	rs28594379	Heel bone mineral density					36	1.15e-81
ENSG00000116830	TTF2	Q9UNY4	Q9UNY4	1_117596187_A_C	rs2806856	0.000140817	2.69e-06	1	2.31e-09	0.585540223	6.09e-06	0.504099657	1.18e-05	0.34043079200000004	1.13e-06	0.372650514	True	202	21818947.41	0.118138188	45	0.10928761	False	117596187,117596358,117596394,117596559,117596588,117596722,117596744,117596964,117597025,117597615,117597711,117597847,117597901,117597994,117598302,117598372,117598471,117598528,117598695,117598906,117599054,117599370,117599662,117600045,117602077,117602334,117617705,117618067,117619936,117624858,117625394	1_117617705_A_G;	1_117624858_CAG_C;1_117624857_ACA_A;			1_117625394_T_C;1_117624858_CAG_C;1_117624858_C_G;1_117624857_ACA_A;1_117619936_G_A;		1_117618067_C_T;	0.45049505	False	True	True	True	False	True	42.0	45.0								8	1.18e-07
ENSG00000116957	TBCE	Q15813	Q15813	1_235708443_C_A	rs10925965	0.003510509	0.000112182	1	3.01e-08	-0.351811934	0.00284443	-0.8602428240000001	6.590000000000001e-09	-0.509146786	2.8e-11	-0.5245507079999999	True	202	24990728.52	0.141883617	30	0.109739551	True	235,708,443,235,705,000,000,000,000,000,000,000,000,000,000,000,000,000,000,000,000,000,000,000,000,000,000,000,000,000,000,000,000,000,000,000,000,000,000								0.344059406	False	False	False	False	False	False	29.0	30.0								6	1.09e-07
ENSG00000117054	ACADM	Q5T4U5	Q5T4U5	1_76229120_T_C	rs8763	0.077673962	0.005500548	1	1.78e-06	0.563035396	0.002233772	0.465827676	1.55e-09	0.590100276	1.31e-05	0.399154204	True	202	38156794.17	0.133342175	22	0.094898969	False	762,291,207,610,192,000,000,000				1_76229120_T_C;	1_76229120_T_C;	1_76229120_T_C;		0.17574257399999998	True	False	False	True	False	False	19.0	22.0								12	1.08e-20
ENSG00000117305	HMGCL	P35914	P35914	1_24166536_T_G	rs12121387	0.087494863	0.006411305999999999	1	2.14e-05	0.312062142	0.001458547	0.43187832	0.00012222899999999998	0.324474513	3.17e-09	0.35771644	True	202	6426101.3560000025	0.185362255	9	0.241043599	False	24166536,24100223,24108683,24114129,24127864,24132305,24132785,24133612,24135292,24136007,24136545,24139856,24145047,24147830,24148260,24148365,24149315,24149989,24150437,24151996,24152401,24153231,24153977,24154067,24154566,24155731,24155924,24157634,24158398,24158775,24160236,24161266,24162026,24162662,24164398,24165248,24165676,24165745,24166054,24166191,24168019,24171543,24172765,24173089,241…		1_24150437_TACTC_T;			1_24150437_TACTC_T;1_24149989_C_T;1_24149315_C_A;1_24148365_T_C;1_24148260_T_A;1_24147830_G_C;1_24145047_T_A;1_24139856_A_C;1_24136545_C_T;1_24136007_C_T;1_24135292_G_T;1_24133612_G_A;1_24132785_C_T;1_24132305_G_A;			0.472772277	False	True	False	True	False	False	7.0	9.0	1_24153231;1_24194014;1_24199363;1_24199363;1_24199364;1_24199869;1_24199869	rs6424115;rs3003333;rs2502994;rs2502994;rs2501426;rs3003334;rs3003334	Immature fraction of reticulocytes;Red blood cell count;Eosinophil counts;Mean corpuscular hemoglobin;Eosinophil counts;Eosinophil percentage of granulocytes;Eosinophil percentage of white cells					11	1.22e-12
ENSG00000117505	DR1	Q01658	Q01658	1_93580992_C_T	rs566843	0.028814695	0.001544789	1	7.92e-06	-0.306431149	1.100487265	-0.141431676	0.000154467	-0.173378864	0.000117893	-0.222193984	True	202	4316323.9339999985	0.182654655	5	0.148270376	True	9,358,099,293,539,210,000,000,000,000,000,000,000,000,000,000,000,000,000,000,000,000,000,000,000,000,000,000,000,000,000,000,000,000,000,000,000,000								0.26980198	False	False	False	False	False	False	5.0	5.0								11	3.54e-17
ENSG00000117533	VAMP4	O75379	O75379	1_171688839_G_A	rs3820167	0.040283441	0.002268095	1	2.23e-06	0.521698334	0.000515665	0.470713806	5.83e-07	0.4412259570000001	1e-07	0.34585391	True	128	213902.8435	0.251669509	2	0.405042848	True	171,688,839,171,648,000					1_171688839_G_A;	1_171688839_G_A;		0.475247525	False	False	False	True	False	False	2.0	2.0								3	7.240000000000002e-07
ENSG00000117593	DARS2	Q6PI48	Q6PI48	1_173700149_G_A		0.04359818	0.0024853460000000003	1	1.7199999999999998e-05	-0.397807623	0.002362755	-0.401032541	2.71e-08	-0.446639181	5.17e-09	-0.536570505	True	202	27015759.62	0.162291132	24	0.239953667	False	173700149								0.294554455	False	False	False	False	False	False	23.0	24.0								17	3.04e-35
ENSG00000117614	SYF2	O95926	O95926	1_25305783_T_G	rs11249222	0.099343104	0.007593474	1	2.56e-05	-0.397105288	0.00983018	-0.579958176	0.8102045590000001	-0.08474274300000001	0.700408063	-0.018629937	False	193	1873856.21	0.235442327	6	0.283839764	True	25305783								0.472772277	False	False	False	False	False	False	6.0	6.0								0
ENSG00000117868	ESYT2	A0FGR8-6	A0FGR8-6	7_158632951_T_A	rs75701515	0.001178179	3.13e-05	1	5.49e-08	0.7948352809999999	7.8e-06	0.72281246	1.7800000000000002e-05	0.469140042	4.34e-05	0.43302589	True	202	14898107.1	0.235145771	28	0.101004177	False	158632951,158524204,158526880,158529668,158530351,158531177,158531544,158534764,158535627,158536743,158537178,158539392,158543648,158544830,158551623,158553717,158553824,158555242,158558153,158559017,158562097,158564385,158564985,158566781,158572273,158574758,158577277,158577565,158578514,158578786,158578830,158579222,158579383,158581762,158582653,158582784,158583412,158583739,158584426,158585239…		7_158603379_GA_G;7_158602548_C_CGTTT;7_158595801_CGA_C;7_158594286_CACACAGGA_C;7_158578830_AT_A;7_158574758_TGTG_T;		7_158526880_G_A;7_158524204_G_A;	7_158616163_G_A;7_158615982_T_C;7_158613970_G_A;7_158611550_G_A;7_158609396_C_G;7_158608223_T_A;7_158608026_C_T;7_158607327_T_C;7_158606588_G_A;7_158606525_C_T;7_158606438_G_C;7_158604515_A_G;7_158603379_GA_G;7_158603379_G_A;7_158602860_C_T;7_158602548_C_CGTTT;7_158602548_C_T;7_158599770_G_A;7_158598983_A_C;7_158595849_G_T;7_158595801_CGA_C;7_158595529_A_G;7_158594831_A_T;7_158594784_G_C;7_158594…			0.101485149	True	True	False	True	False	False	27.0	27.0								16	6.22e-14
ENSG00000117877	CD3EAP	O15446	O15446	19_45903766_T_C	rs4572514	0.005150142	0.000183266	1	3.8e-08	-0.566076266	1.83e-10	-0.883208562	1.64e-12	-0.15772271699999998	0.159002501	0.103944483	True	202	17946060.49	0.113245147	15	0.147231536	True	459,037,664,590,752,000,000,000,000,000,000,000,000,000,000,000				19_45909934_G_A;	19_45910003_G_T;			0.183168317	True	False	False	True	False	False	12.0	15.0								5	1.57e-24
ENSG00000118193	KIF14	Q15058	Q15058	1_200813145_G_A	rs188707771	0.0015538210000000002	4.2700000000000015e-05	1	1.7e-06	0.8823201559999999	3.11e-05	1.2845240059999998	0.392933722	0.08078304	0.321013015	0.106988278	False	202	13663063.34	0.120345222	46	0.12955324	False	200,813,145,200,800,000								0.061881188	False	False	False	False	False	False	24.0	29.0								0
ENSG00000118939	UCHL3	P15374	P15374	13_76097291_G_A	rs7319334	0.001367943	3.67e-05	1	1.47e-08	-0.32858088	4.71e-05	-0.409516326	9.959999999999999e-23	-0.332255903	0.850455327	0.009712899	True	202	16325870.44	0.144219342	14	0.12759718	False	760,972,917,608,498,000,000,000,000,000,000,000,000,000,000,000								0.415841584	False	False	False	False	False	False	13.0	14.0								1	1.06e-05
ENSG00000119041	GTF3C3	Q9Y5Q9	Q9Y5Q9	2_197812774_G_T	rs2376185	0.045520889	0.002642908	1	4e-06	-0.539665827	0.93452823	-0.377544559	0.562636224	-0.326022145	0.419154934	-0.053539919000000005	False	202	21470696.13	0.074214205	31	0.06132863700000001	True	197812774								0.091584158	False	False	False	False	False	False	19.0	28.0								0
ENSG00000119383	PPP2R4	Q15257	Q15257	9_131905854_G_A	rs3118634	1.07e-07	2.92e-10	3	1.12e-14	-0.800720757	0.000310258	-0.89362003	0.000180735	-0.544457435	8.17e-14	-0.660397998	True	202	11302836.32	0.166445016	12	0.102503786	False	131,905,854,131,898,000,000,000,000	9_131909736_C_T;	9_131898256_AT_A;		9_131905854_G_A;	9_131898256_AT_A;9_131905854_G_A;			0.061881188	True	True	True	True	False	False	9.0	10.0					Astle-W_baso-p-gran_EUR_2017;Astle-W_rdw_EUR_2017	0.667189	0.0	20	3.99e-16
ENSG00000119471	HSDL2	Q6YN16	Q6YN16	9_115140735_A_G	rs10817330	0.044571784	0.002581253	1	1.62e-05	0.385880619	0.000469778	0.6873764	1.32e-10	0.509353517	2.0399999999999997e-21	0.78937926	True	202	20027487.47	0.169237401	24	0.133227378	False	115,140,735,115,140,000,000,000,000,000,000,000,000,000,000,000,000,000,000,000,000,000,000,000					9_115146105_C_T;9_115146053_T_G;9_115145458_G_A;9_115144889_T_C;9_115143513_A_G;			0.351485149	False	False	False	True	False	False	23.0	24.0								16	1.2799999999999998e-45
ENSG00000119541	VPS4B	O75351	O75351	18_61054661_G_A	rs9965867	0.0015273670000000002	4.17e-05	1	1.7e-07	-0.342269259	0.000286269	-0.373560573	2.36e-07	-0.277075374	1.09e-11	-0.404311502	True	202	25216686.35	0.109749327	21	0.227037794	False	61054661,61054294,61055369,61055663,61055697,61056850,61058722,61059043,61059219,61059354,61060873,61061325,61063107,61063139,61065341,61066463,61066956,61067122,61067588,61067959,61068237,61069347,61069510,61069958,61072650,61072660,61073272,61073563,61074136,61074388,61076093,61077757,61078888,61080365,61084959,61086450,61086553,61087994,61088581		18_61078888_G_GT;18_61069510_TC_T;18_61069509_TTC_T;18_61063137_CAT_C;18_61056850_C_CAT;		18_61056850_C_CAT;	18_61088581_G_A;18_61087994_C_T;18_61086553_T_C;18_61086450_C_G;18_61084959_G_C;18_61080365_A_G;18_61078888_G_GT;18_61077757_T_C;18_61076093_T_C;18_61074388_G_A;18_61074136_T_C;18_61073563_C_T;18_61073272_C_A;18_61072660_C_A;18_61072650_A_G;18_61069958_T_G;18_61069510_TC_T;18_61069509_TTC_T;18_61069347_T_C;18_61068237_G_A;18_61067959_T_C;18_61067588_C_T;18_61067122_C_T;18_61066956_T_C;18_61066463…	18_61088581_G_A;18_61087994_C_T;18_61086553_T_C;18_61086450_C_G;18_61084959_G_C;18_61080365_A_G;18_61078888_G_GT;18_61077757_T_C;18_61076093_T_C;18_61074388_G_A;18_61074136_T_C;18_61073563_C_T;18_61073272_C_A;18_61072660_C_A;18_61072650_A_G;18_61069958_T_G;18_61069510_TC_T;18_61069509_TTC_T;18_61069347_T_C;18_61068237_G_A;18_61067959_T_C;18_61067588_C_T;18_61067122_C_T;18_61066956_T_C;18_61066463…		0.49009901	True	True	False	True	False	False	19.0	20.0								1	9.72e-07
ENSG00000119673	ACOT2	A0A087WT95	A0A087WT95	14_74092088_A_G	rs73295349	0.013154947	0.000572825	1	4.25e-06	-0.485090096	0.016817822	-0.429019169	0.201947499	-0.216808362	0.020939042	-0.233910755	False	202	8676250.807	0.193887978	2	0.251615855	False	74092088,74033495,74035269,74036613,74039085,74039116,74039653,74040461,74053104,74056148,74059450,74063592,74064853,74065492,74066270,74067702,74068430,74076621,74077186,74079209,74082105,74085786,74088473,74089254,74092985,74093365,74093578,74093991,74094274,74094608,74095858,74096048		14_74039116_A_AAC;14_74035269_CA_C;			14_74040461_T_C;14_74039653_A_C;14_74039116_A_AAC;14_74039085_A_T;14_74036613_G_T;14_74035269_CA_C;			0.188118812	False	True	False	True	False	False	1.0	2.0								7	1.06e-11
ENSG00000119711	ALDH6A1	Q02252	Q02252	14_74305948_A_C	rs72627104	0.063454788	0.004240687	1	3.88e-05	-0.419962466	0.019225302	-0.671417307	0.0028519	-0.196670061	0.002201256	-0.205900351	True	202	28519959.82	0.17250095899999998	29	0.175443075	False	74305948,74309154,74326903,74341124,74342413,74351765,74351973,74355233,74356274,74356778,74356930,74357664,74359417,74362935,74363305,74363480,74368236,74368331,74369128,74369623,74370024,74370098,74371166,74374485,74374805,74374897,74380389,74381083,74383679,74392128,74392342,74394295,74397545,74400492,74401900,74403771								0.094059406	False	False	False	False	False	False	20.0	25.0	14_74368331	rs72627123	Morning vs. evening chronotype					0
ENSG00000119844	AFTPH	Q6ULP2-5	Q6ULP2-5	2_64694847_T_A	rs918293	0.094324461	0.007077371	1	6.34e-05	0.385558248	0.556344245	0.403990696	1.765881108	0.114097826	0.816311985	0.014619058999999997	False	202	3164380.135	0.238618283	12	0.348208384	False	64,694,847,646,910,300,000,000,000,000,000								0.346534653	False	False	False	False	False	False	8.0	12.0								0
ENSG00000120539	MASTL	Q96GX5	Q96GX5	10_27438284_C_T		0.000189692	3.8e-06	1	4.5700000000000006e-09	-0.49877246	1.17e-07	-0.643255802	1.81e-28	0.260899916	6.389999999999997e-32	1.165229826	True	202	6498206.139	0.111075669	20	0.099079063	False	27438284,27363041,27364894,27368126,27371126,27371623,27371647,27373198,27376619,27377282,27382240,27384160,27384247,27384357,27386726,27389548,27393142,27399117,27405331,27405969,27406854,27414778,27416747,27420185,27423510,27425021,27426775,27434968,27436295,27438713,27439160,27443623,27444303,27444328,27444763,27445196,27445574,27450684,27450822,27452553,27452867,27453031,27454111,27455902,274…		10_27474715_CA_C;10_27460501_TA_T;10_27455902_GATATGTAATTCTTAATACATATTA_G;10_27452867_C_CATTT;		10_27475693_T_C;10_27475494_T_C;10_27444328_C_A;10_27444303_G_A;	10_27475010_C_T;10_27474715_CA_C;10_27474288_G_A;10_27474078_A_G;10_27473901_A_G;10_27473624_G_T;10_27469678_G_T;10_27469503_T_A;10_27469165_T_A;10_27469101_T_C;10_27468762_T_C;10_27467495_C_T;10_27467486_G_A;10_27467010_A_G;10_27466970_A_C;10_27466473_G_A;10_27466165_C_A;10_27465828_G_A;10_27464370_T_C;10_27463655_A_G;10_27463236_A_G;10_27463114_C_T;10_27463012_G_A;10_27461953_T_A;10_27460501_TA…		10_27475444_T_C;10_27459670_C_T;	0.353960396	True	True	False	True	False	True	20.0	20.0								42	5.069999999999996e-90
ENSG00000120675	DNAJC15	Q9Y5T4	Q9Y5T4	13_43598844_C_A	rs61074976	4.19e-10	1.52e-12	1	2.0699999999999999e-16	-0.967503724	2.14e-13	-0.978464257	4.32e-33	-1.417650524	2.58e-35	-1.421867419	True	184	1271398.38	0.380598488	4	0.393174238	False	###############################################################################################################################################################################################################################################################	13_43597865_A_G;	13_43604134_AAAG_A;13_43600811_CAATG_C;		13_43597706_C_T;	13_43616973_T_A;13_43616214_T_G;13_43613458_A_T;13_43612074_A_G;13_43608939_G_T;13_43607650_A_G;13_43607186_A_G;13_43604332_T_A;13_43604134_AAAG_A;13_43600811_CAATG_C;13_43600228_G_A;13_43599057_T_C;13_43598958_C_T;13_43598707_G_C;13_43598575_T_G;13_43598566_G_T;13_43598412_G_A;13_43598322_C_G;13_43598191_A_G;13_43598189_A_T;13_43597995_G_T;13_43597980_G_A;13_43597977_C_G;13_43597932_C_G;13_43598…			0.29950495	True	True	True	True	False	False	4.0	4.0								48	4.9799999999999994e-107
ENSG00000120860	CCDC53	F5GZ97	F5GZ97	12_102394872_A_T	rs2373564	0.001124289	1.47e-05	2	2.65e-09	-0.617803025	1.67e-08	-0.5876535270000001	1.6600000000000006e-11	-0.747968695	1.49e-14	-0.795279955	True	202	1492207.5580000004	0.176608743	6	0.167517965	False	102394872,102399354,102399379,102401012,102404119,102404468,102405062,102408147,102408856,102409089,102409334,102412703,102414568,102415256,102417475,102417638,102418604,102420892,102424383,102428444,102429442,102429501,102432065,102437117,102438686,102444064,102444999,102446675,102452264,102455729,102461089,102463140,102463532,102466028,102466992,102468660,102474852,102476128,102476429,102480028…		12_102429442_CAT_C;12_102412703_G_GTAGCTGGTATTAC;12_102409334_AGT_A;			12_102452264_C_A;12_102446675_T_G;12_102444999_G_T;12_102444064_C_T;12_102438686_T_G;12_102437117_G_A;12_102432065_G_A;12_102429501_A_C;12_102429442_CAT_C;12_102428444_T_C;12_102424383_A_T;12_102420892_T_A;12_102418604_A_G;12_102417638_C_A;12_102417475_T_C;12_102415256_T_C;12_102414568_G_T;12_102412703_G_GTAGCTGGTATTAC;12_102409334_AGT_A;12_102409089_A_G;12_102408856_G_A;12_102408147_T_G;	12_102455729_G_A;12_102452264_C_A;12_102446675_T_G;12_102444999_G_T;12_102444064_C_T;12_102438686_T_G;12_102437117_G_A;12_102432065_G_A;12_102429501_A_C;12_102429442_CAT_C;12_102428444_T_C;12_102424383_A_T;12_102420892_T_A;12_102418604_A_G;12_102417638_C_A;12_102417475_T_C;12_102415256_T_C;12_102414568_G_T;12_102412703_G_GTAGCTGGTATTAC;12_102409334_AGT_A;12_102409089_A_G;12_102408856_G_A;12_10240…	12_102455729_G_A;12_102444064_C_T;	0.183168317	False	True	False	True	False	True	5.0	6.0								29	3.67e-46
ENSG00000120915	EPHX2	P34913	P34913	8_27363136_A_G	rs4149239	3.2799999999999994e-09	1.57e-11	1	1.53e-16	0.94525461	1.08e-10	1.025653954	1.43e-14	0.7930822479999999	1.65e-27	0.993734085	True	202	3073074.587	0.264195357	14	0.179453384	False	27363136,27347401,27351219,27354471,27354611,27355130,27365430,27371546,27372189,27373923,27378633,27381194,27382504,27385415,27385450,27387230,27387392,27387584,27388199,27388320,27388345,27389457,27389542,27390192,27391191,27391620,27392986,27393066,27393220,27394724,27394957,27395249,27396111,27396523,27397157,27402494,27402664,27404137		8_27387584_CT_C;8_27382504_GA_G;	8_27373923_T_C;	8_27402664_G_A;8_27402494_C_T;	8_27397157_T_C;8_27396523_T_C;8_27396111_G_T;8_27395249_T_C;8_27394957_C_A;8_27394724_G_C;8_27393220_T_G;8_27393066_G_A;8_27392986_C_T;8_27391620_G_C;8_27391191_A_C;8_27390192_G_A;8_27389542_T_C;8_27389457_G_A;8_27388345_A_T;8_27388320_C_G;8_27388199_G_A;8_27387584_CT_C;8_27387392_C_T;8_27387230_C_G;8_27385450_A_G;8_27385415_C_T;8_27382504_GA_G;8_27381194_G_C;8_27378633_T_C;8_27373923_T_C;8_27372…			0.14603960400000002	True	True	False	True	True	False	14.0	14.0								39	9.41999999999999e-78
ENSG00000121058	COIL	P38432	P38432	17_55086348_A_G	rs11079267	0.095963709	0.007256531999999999	1	4.54e-06	-0.362939025	0.0051792	-0.35265729799999995	0.148996649	-0.144112668	0.001348896	-0.23650945	True	202	12349702.8	0.131868693	18	0.128579089	True	55086348								0.349009901	False	False	False	False	False	False	16.0	18.0								0
ENSG00000121207	LRAT	O95237	O95237	4_155652184_G_A	rs17031960	0.077357534	0.005434266	1	0.000222609	0.437517417	0.016470951	0.62443714	7.09e-06	0.418888205	1.43e-06	0.387181901	True	156	705555.0623	0.8560888720000001	6	0.230022559	False	155652184					4_155652184_G_A;			0.235148515	False	False	False	True	False	False	6.0	6.0								0
ENSG00000121749	TBC1D15	Q8TC07-2	Q8TC07-2	12_72258585_T_C	rs2016880	0.039184907000000005	0.002194995	1	1.5e-05	0.325973789	0.007328923	0.390338206	0.058085228	0.272892678	0.726550661	0.021364992000000003	False	202	36326708.64	0.100987415	30	0.07414777	False	722,585,857,223,233,000,000,000,000,000,000,000,000,000,000,000,000,000,000,000,000,000,000,000,000,000,000,000,000,000,000,000,000,000,000,000,000,000,000,000,000,000,000,000,000,000,000,000,000,000,000,000,000,000,000,000		12_72255701_A_ACTT;		12_72307616_A_G;	12_72310935_G_C;12_72308732_T_C;12_72307983_C_T;12_72293544_T_G;12_72293353_G_A;12_72287159_T_C;12_72280141_A_G;12_72273569_A_G;12_72269950_T_G;12_72267425_C_A;12_72266234_T_C;12_72264383_A_T;12_72264234_G_T;12_72263531_C_T;12_72260048_G_C;12_72255701_A_ACTT;12_72246542_C_G;12_72236167_T_G;12_72258585_T_C;	12_72310935_G_C;12_72308732_T_C;12_72307983_C_T;12_72307616_A_G;12_72293544_T_G;12_72293353_G_A;12_72287159_T_C;12_72280141_A_G;12_72273569_A_G;12_72269950_T_G;12_72267425_C_A;12_72266234_T_C;12_72264383_A_T;12_72264234_G_T;12_72263531_C_T;12_72260048_G_C;12_72255701_A_ACTT;12_72246542_C_G;12_72236167_T_G;12_72258585_T_C;	12_72307616_A_G;	0.29207920800000003	True	True	False	True	False	True	28.0	30.0								1	3.2599999999999997e-16
ENSG00000121988	ZRANB3	Q5FWF4-3	Q5FWF4-3	2_136290607_T_C	rs59605931	0.023615183	0.001194166	1	4.839999999999999e-07	-0.8780434000000001	3.01e-06	-1.351361539	2.02e-16	-0.979328485	2.98e-16	-1.094533415	True	193	1155165.467	0.17562903800000002	13	0.204633484	False	136290607,135933921,135949715,135958693,135958853,135962864,135963304,135965376,135969264,135976498,135990031,135991470,136000253,136001215,136001295,136005477,136005971,136016514,136016881,136017388,136020977,136027535,136031588,136032905,136041102,136041662,136042480,136043885,136047387,136054815,136055275,136056285,136061560,136063118,136063685,136066802,136068890,136069060,136069577,136072179…		2_136286434_G_GATCT;2_136277652_CT_C;2_136277652_CTT_C;2_136267807_GG_G;2_136191407_TA_T;2_136092331_GGC_G;2_136088256_CT_C;2_136016881_C_CAA;2_135969264_A_AGGAT;		2_135965376_T_C;	2_136286434_G_GATCT;2_136277652_CT_C;2_136277652_CTT_C;2_136277304_T_C;2_136275985_T_C;2_136272074_A_T;2_136267808_G_A;2_136267807_GG_G;2_136266241_G_C;2_136254419_G_A;2_136251329_C_G;2_136250285_C_T;2_136249245_A_G;2_136244171_A_G;2_136232572_A_G;2_136229598_G_A;2_136229438_A_C;2_136228929_G_C;2_136226626_C_T;2_136221500_C_A;2_136219999_C_T;2_136217980_C_T;2_136208747_C_T;2_136204827_T_C;2_13620…	2_136286434_G_GATCT;2_136277652_CT_C;2_136277652_CTT_C;2_136277304_T_C;2_136275985_T_C;2_136272074_A_T;2_136267808_G_A;2_136267807_GG_G;2_136266241_G_C;2_136254419_G_A;2_136251329_C_G;2_136250285_C_T;2_136249245_A_G;2_136244171_A_G;2_136232572_A_G;2_136229598_G_A;2_136229438_A_C;2_136228929_G_C;2_136226626_C_T;2_136221500_C_A;2_136219999_C_T;2_136217980_C_T;2_136208747_C_T;2_136204827_T_C;2_13620…	2_135965376_T_C;	0.094059406	True	True	False	True	False	True	9.0	10.0								6	1.18e-07
ENSG00000122484	RPAP2	Q8IXW5	Q8IXW5	1_92766065_C_G	rs17578954	0.021377574	0.001050987	1	4.220000000000001e-07	-0.849671237	0.002929417	-0.75862861	0.019579712	-0.466758689	0.372297912	-0.106490996	False	202	7608194.576	0.114932806	18	0.131507557	False	927,660,659,260,819,000,000,000,000,000,000,000,000,000,000,000,000,000,000,000,000,000,000,000					1_92766065_C_G;			0.076732673	False	False	False	True	False	False	16.0	16.0								1	7.92e-05
ENSG00000122729	ACO1	P21399	P21399	9_32355148_A_G	rs12684282	0.077222243	0.005405467	1	2.71e-05	0.497660929	0.010133708	0.7605709070000001	0.278007801	0.181227953	0.044278596	0.22630258	False	202	37585527.34	0.187716438	34	0.149619509	False	3,235,514,832,367,880								0.076732673	False	False	False	False	False	False	29.0	30.0								0
ENSG00000122971	ACADS	P16219	P16219	12_121152017_T_G	rs12828810	0.008415219	0.000336885	1	2.68e-07	-0.510659046	2.07e-09	-0.543748121	0.016458683	0.193570691	0.0017820370000000004	0.222531749	False	202	3431234.767	0.246595969	9	0.188950093	False	121,152,017,121,130,000,000,000,000,000,000,000,000,000,000,000,000,000,000,000,000,000,000,000,000,000,000,000,000,000,000,000,000,000,000,000,000,000,000,000,000,000,000,000,000,000,000,000,000,000,000,000,000,000,000,000,000	12_121176083_G_A;		12_121176083_G_A;	12_121177272_G_C;	12_121175524_T_C;12_121171891_G_A;12_121167387_C_T;			0.264851485	True	False	True	True	True	False	9.0	9.0	12_121140319;12_121160615;12_121160615;12_121160615;12_121175524;12_121175524;12_121176083;12_121180019	rs2393778;rs2066938;rs2066938;rs2066938;rs2014355;rs2014355;rs1799958;rs34708625	Fractional excretion of metabolites in chronic kidney disease;Blood metabolite levels;Metabolic traits;Serum metabolite levels;Metabolite levels;Serum metabolite concentrations in chronic kidney disease;Serum metabolite ratios in chronic kidney disease;Serum metabolite ratios in chronic kidney disease		Ferreira-M_Allergic-Disease_EUR_2017	1.05e-08	2.289999999999996e-262	11	2.67e-23
ENSG00000123297	TSFM	P43897	P43897	12_58142854_C_A	rs2069506	4.26e-09	1.12e-11	2	1.23e-15	-0.7706840859999999	4.77e-10	-0.548558819	3.95e-28	-0.6932973309999999	3.11e-24	-0.6151327120000001	True	202	24244911.22	0.114345866	16	0.096474708	False	58142854,58124992,58129302,58139253,58144665,58146719,58157988,58161898,58162085,58162739,58163304,58165085,58166403,58167193,58167661,58167788,58167992,58169361,58170335,58170556,58171726,58172929,58173448,58173466,58174306,58175201,58176614,58177379,58177437,58177943,58178148,58178162,58178589,58180416,58182050,58182312,58186594,58187758,58188157,58188696,58193448,58196447,58196528,58196802,582…		12_58177379_CT_C;	12_58177437_C_T;	12_58196528_G_A;12_58196447_G_A;12_58177943_G_A;12_58176614_T_C;	12_58196802_A_G;12_58196528_G_A;12_58196447_G_A;12_58193448_T_C;12_58188696_G_C;12_58188157_T_C;12_58187758_G_T;12_58186594_C_T;12_58186594_CA_TG;12_58182312_C_T;12_58180416_G_C;12_58178589_A_G;12_58178162_A_G;12_58178148_G_A;12_58177943_G_A;12_58177437_C_T;12_58177379_CT_C;	12_58178589_A_G;12_58178162_A_G;12_58178148_G_A;12_58177943_G_A;12_58177437_C_T;12_58177379_CT_C;12_58176614_T_C;	12_58176614_T_C;	0.29950495	True	True	False	True	True	True	16.0	16.0	12_58162739;12_58208164	rs703842;rs1021469	Multiple sclerosis;Self-reported math ability (MTAG)	5E-11;1E-8	Astle-W_pct_EUR_2017;Astle-W_pdw_EUR_2017;IBDGC_IBD_EUR_2015;IBDGC_Ulcerative-Colitis_EUR_2015	0.10037	4.2199999999999937e-156	35	1.7099999999999995e-66
ENSG00000123815	ADCK4	Q96D53	Q96D53	19_41218255_G_T	rs11671127	0.018533575	0.0008764560000000001	1	8.890000000000002e-07	-0.511650399	7.11e-05	-1.3607194969999998	6.36e-18	-0.902959459	0.005890259	-0.239178254	True	202	5366948.773	0.153908516	16	0.197564572	False	412,182,554,122,052,000,000,000,000,000,000,000,000,000,000,000,000,000,000,000,000,000,000,000					19_41220529_C_T;19_41218255_G_T;	19_41220529_C_T;19_41218255_G_T;	19_41220529_C_T;	0.165841584	False	False	False	True	False	True	15.0	16.0								10	1.76e-14
ENSG00000124207	CSE1L	P55060	P55060	20_47775696_A_C	rs6125575	0.039184907000000005	0.002188429	1	1.67e-05	0.221618263	0.032303441	0.397400091	0.485619467	0.117664373	0.121199671	0.08880398099999999	False	202	207814576.1	0.123030894	46	0.11251652	True	47775696,47541600,47543604,47549979,47551632,47554392,47555536,47568658,47571551,47573598,47578606,47580699,47582958,47598497,47599205,47599690,47621372,47623420,47625544,47627170,47635715,47639464,47640466,47645427,47646210,47646321,47647068,47648353,47648854,47653364,47654258,47656787,47656889,47658351,47660285,47662627,47662823,47663382,47663944,47667056,47675176,47675525,47676281,47677017,476…		20_47710558_ACAG_A;20_47701338_TAGGTTCTTTCCTTCATCA_T;20_47696787_TG_T;20_47687238_TG_T;		20_47713063_C_T;	20_47710558_ACAG_A;20_47707944_C_T;20_47704039_C_T;20_47703810_C_A;20_47701589_T_C;20_47701339_A_G;20_47701338_TAGGTTCTTTCCTTCATCA_T;20_47699657_G_A;20_47696787_TG_T;20_47695391_G_A;20_47693047_C_T;20_47692827_T_C;20_47692392_T_C;20_47690591_T_G;20_47690189_G_A;20_47690139_T_C;20_47687238_TG_T;20_47681882_G_C;20_47678770_A_G;20_47677017_G_A;20_47676281_G_A;20_47675525_G_A;20_47675176_T_A;20_47667…			0.425742574	True	True	False	True	False	False	38.0	46.0	20_47541600;20_47543604;20_47675176;20_47675176;20_47681882;20_47701589;20_47714370;20_47750377;20_47770756;20_47770756;20_47798664	rs6012564;rs6019537;rs2064853;rs2064853;rs6063349;rs2075679;rs71351958;rs6066975;rs2273653;rs2273653;rs8118105	Anger;Intelligence;General cognitive ability;Intelligence (MTAG);Non-response to citalopram or escitalopram and depression;Subjective well-being (MTAG);Educational attainment (MTAG);Depression;Depressive symptoms;Depressive symptoms (MTAG);Reaction time		Sniekers-S_Intelligence_EUR_2017	0.00445649	3.06e-05	22	1.1499999999999999e-39
ENSG00000124299	PEPD	P12955	P12955	19_33884341_A_G	rs16968074	0.002941861	9.02e-05	1	2.29e-08	0.388517638	0.00013131200000000002	0.3637469270000001	7.49e-16	0.57746531	1.7000000000000002e-18	0.680406045	True	202	27941516.83	0.168529355	21	0.200663506	False	3,388,434,133,877,520,000,000,000,000,000,000,000,000,000,000,000,000,000,000,000,000,000,000,000,000,000,000,000,000	19_33878837_G_A;19_33878834_TAAG_T;	19_33883821_TA_T;19_33877912_G_GAAAGT;		19_33878198_A_G;19_33878039_A_G;19_33877912_G_GAAAGT;	19_33884171_G_A;19_33884123_C_G;19_33883821_TA_T;19_33880000_C_G;19_33884341_A_G;			0.339108911	True	True	True	True	False	False	19.0	21.0	19_33884341	rs16968074	Lead levels in blood	9.00E-07	GIANT_WHR-Active-F_Mixed_2017;GIANT_WHR-Active_EUR_2017;GIANT_WHR-adjusted-PA_EUR_2017;GIANT_WHR-adjusted-Smoking-M_Mixed_2017;GIANT_WHR-adjusted-Smoking_EUR_2017;GIANT_WHRadjBMI_Mixed_2015	8.3e-06	9.66e-11	23	8.880000000000001e-20
ENSG00000124406	ATP8A1	Q9Y2Q0-3	Q9Y2Q0-3	4_42843157_G_A	rs11724134	0.094839385	0.007127108	1	1.17e-05	-0.912136802	0.250182534	-0.526977715			0.774124487	0.037680602	False	202	1200757.217	0.269527402	6	0.51805308	False	42843157								0.059405941	False	False	False	False	False	False	1.0	1.0								0
ENSG00000124587	PEX6	Q13608	Q13608	6_42928017_C_G	rs11752813	6.25e-15	7.31e-18	1	3.3599999999999996e-20	0.95530889	6.32e-13	1.322170898	3.6599999999999997e-38	1.17973349	3.7700000000000007e-39	1.214625975	True	202	1557982.164	0.242768395	17	0.244242659	True	429,280,174,291,592,000,000,000,000,000,000,000,000,000,000,000,000,000,000,000,000,000,000,000,000,000,000,000,000,000,000,000,000,000,000,000,000,000,000,000,000,000,000,000,000,000,000,000	6_42932200_G_T;	6_42935685_C_CT;	6_42942779_A_G;	6_42946943_G_A;6_42932200_G_T;	6_42944850_C_T;6_42943098_T_C;6_42942779_A_G;6_42940365_G_A;6_42940235_G_A;6_42937176_C_A;6_42937126_C_T;6_42935685_C_CT;		6_42946490_C_A;	0.425742574	True	True	True	True	True	True	16.0	16.0	6_42928461;6_42932200	rs10948059;rs1129187	High density lipoprotein cholesterol levels;Alzheimer's disease in APOE e4+ carriers		CHARGE_Arachidonic-acid_EUR_2014;GLGC_LDL_EUR_2013;van-der-Harst-P_CAD-UKBB_Mixed_2018;van-der-Harst-P_CAD_Mixed_2018	0.05806910000000001	0.019117500000000003	48	9.619999999999988e-128
ENSG00000124588	NQO2	P16083	P16083	6_2996321_C_G		9.91e-11	2.9e-13	1	3.88e-22	-0.906659965	6.57e-19	-0.8909268459999999	1.6200000000000002e-12	-0.827639503	4.54e-08	-0.583843675	True	202	10787373.76	0.388751018	10	0.304346685	False	299,632,129,939,352,000,000,000,000,000,000,000,000,000					6_2999729_A_G;6_2999371_A_G;6_2999328_A_G;6_2997650_A_G;6_2993935_G_A;6_2996321_C_G;			0.410891089	False	False	False	True	False	False	10.0	10.0								6	1.15e-09
ENSG00000124767	GLO1	Q04760	Q04760	6_38650628_T_G		0.006177594000000001	0.000233567	1	8.41e-08	-0.31409033	6.0099999999999995e-25	-0.965400295	0.369453809	-0.11621012	0.159864909	-0.073889052	False	202	42296173.3	0.176462297	8	0.116305584	False	3,865,062,838,632,700,000,000,000,000,000,000,000,000,000,000,000,000,000,000,000,000	6_38650628_T_G;				6_38656329_G_A;6_38647852_G_C;			0.452970297	False	False	True	True	False	False	7.0	9.0								1	2.17e-05
ENSG00000124787	RPP40	O75818	O75818	6_4963528_A_C		0.001670883	4.64e-05	1	7.44e-08	-0.480446774	8.120000000000001e-05	-0.525447446	0.596946862	-0.094305915	0.052972495	-0.136870161	False	202	6235021.002	0.154956181	10	0.17208862800000002	True	49,635,284,963,535								0.212871287	False	False	False	False	False	False	10.0	10.0								1	4.67e-22
ENSG00000124831	LRRFIP1	Q32MZ4	Q32MZ4	2_238506581_C_T	rs13391122	0.00030178	3.34e-06	2	2.96e-08	-0.464657266	3.75e-09	-0.828240207	1.37e-07	-0.495611908	1.07e-17	-0.594307655	True	202	13989658.56	0.144563874	23	0.166206851	False	238,506,581,238,504,000,000,000,000,000,000,000,000,000,000,000,000,000,000,000,000,000,000,000,000,000,000,000,000,000,000,000,000,000,000,000,000,000,000								0.202970297	False	False	False	False	False	False	20.0	22.0								0
ENSG00000124839	RAB17	Q9H0T7	Q9H0T7	2_238509324_G_A	rs10929237	8.03e-05	1.42e-06	1	1.14e-11	-0.7178755090000001	2.8300000000000003e-07	-0.744391535	2.1e-13	-0.7798641140000001	6.79e-15	-0.7591146679999999	True	202	4056397.187	0.416894057	10	0.167136331	False	238,509,324,238,504,000,000,000,000,000,000,000,000,000,000,000,000,000,000,000,000,000,000,000,000,000,000,000,000,000,000,000,000,000,000,000,000,000,000,000,000,000,000,000,000,000,000,000,000,000,000,000,000,000								0.21039604	False	False	False	False	False	False	10.0	10.0								0
ENSG00000125166	GOT2	P00505	P00505	16_58763830_T_A	rs1424245	0.029540378	0.001590609	1	1.51e-06	-0.373948415	6.68e-08	-0.470598845	1.25e-16	-0.55715006	2.18e-11	-0.456089823	True	202	112607647.7	0.164268424	31	0.285333247	False	58763830,58737918,58738050,58738198,58742480,58763627,58769019,58771433,58771451,58773337,58777842,58777975,58779727,58781052,58781884,58782222,58782951,58783558,58783611,58783636,58783708,58783809,58783941,58784725,58785481,58786515,58789431,58789593,58789711,58789729,58790324,58793478,58793882,58794497,58795151,58797668,58798602,58799737,58800224,58802221,58803725,58803829,58806891,58807036,588…					16_58742480_G_A;16_58763830_T_A;	16_58763830_T_A;		0.433168317	False	False	False	True	False	False	25.0	31.0								18	4.84e-18
ENSG00000125375	ATP5S	Q99766	Q99766	14_50804551_A_C	rs4901019	2.32e-08	1.71e-10	1	1.2e-15	0.69988263	1.2e-07	0.705601273	0.004690745	0.272169891	0.008344593	-0.17446635800000002	True	202	2550604.029	0.197915615	7	0.185188934	False	50804551,50714274,50714985,50722359,50726304,50727010,50727109,50727219,50727483,50728736,50729250,50732947,50734100,50736725,50739485,50740191,50740605,50740700,50743180,50743732,50745123,50746096,50747337,50748853,50749924,50750316,50750577,50751199,50751565,50753242,50753992,50754681,50755671,50755991,50756089,50757095,50757131,50759678,50761847,50765758,50768483,50769327,50769455,50769717,507…	14_50798743_G_A;14_50788213_C_T;14_50786004_A_G;	14_50801832_CCTGT_C;14_50800247_A_AT;14_50790832_AAGGTAGATGATCAAAGCCAAAGTGGAAACTTGATAATGCTGTTAAGGTGAATAGTTAGAATTTAATTGACTGTGAGGGGTGGTGTCTTTTTTTAGTTCTAAAAAAGATAATTTTAAAAAATGACCTCACTTTCATCTGTAATATTTTAAAACAGCTAAAATGATCAACCTTAATACATTAATGTTGTATTGAATTTTTTATAGAGTATATTTTAAAAAATTAAATCTACATTAAGCACCTAGCATGGTGCCTGCCACAGTAAGCCCTCAGTAAGCATCAACGATTATGCTTTCTCTCCTTTTTTTTTAAAGCAGTTTCTCCTATGGTTTTAATATTTTCAAGACATTTG…	14_50790832_AAGGTAGATGATCAAAGCCAAAGTGGAAACTTGATAATGCTGTTAAGGTGAATAGTTAGAATTTAATTGACTGTGAGGGGTGGTGTCTTTTTTTAGTTCTAAAAAAGATAATTTTAAAAAATGACCTCACTTTCATCTGTAATATTTTAAAACAGCTAAAATGATCAACCTTAATACATTAATGTTGTATTGAATTTTTTATAGAGTATATTTTAAAAAATTAAATCTACATTAAGCACCTAGCATGGTGCCTGCCACAGTAAGCCCTCAGTAAGCATCAACGATTATGCTTTCTCTCCTTTTTTTTTAAAGCAGTTTCTCCTATGGTTTTAATATTTTCAAGACATTTGGTATATACCTATTAGCATTTTACTGTGTAATTATTTT…	14_50789578_G_C;14_50779346_C_T;14_50779345_CC_CTCGCCCCGCCCT;14_50779229_C_T;	14_50801832_CCTGT_C;14_50801102_G_A;14_50800833_A_T;14_50800618_T_A;14_50800502_A_G;14_50800247_A_AT;14_50800247_A_T;14_50799711_C_T;14_50799643_G_C;14_50799338_T_C;14_50799126_G_C;14_50798665_C_T;14_50798515_C_T;14_50797893_G_A;14_50797822_A_G;14_50797527_A_G;14_50795490_G_A;14_50795177_C_T;14_50793814_G_A;14_50792273_A_G;14_50790832_AAGGTAGATGATCAAAGCCAAAGTGGAAACTTGATAATGCTGTTAAGGTGAATAGTTAGAAT…			0.428217822	True	True	True	True	True	False	7.0	7.0								26	4.04e-48
ENSG00000125755	SYMPK	Q92797	Q92797	19_46319415_G_C	rs1132645	0.049591017	0.002960484	1	3.47e-06	-0.353125538	0.011880383	-0.587023149	3.2e-07	-0.34413590200000005	4.53e-12	-0.460491483	True	202	44789348.76	0.112376329	53	0.094571609	True	46319415				19_46319415_G_C;		19_46319415_G_C;	19_46319415_G_C;	0.274752475	True	False	False	False	False	True	43.0	53.0								8	1.92e-09
ENSG00000125871	MGME1	Q9BQP7	Q9BQP7	20_17946586_C_A	rs16978653	0.063454788	0.004241213	1	2.47e-05	-0.361371518	0.001159505	-0.376364289	4.98e-05	-0.344160478	8.85e-06	-0.406919931	True	202	19011772.79	0.121596834	18	0.159603739	False	1,794,658,617,918,390,000,000,000,000,000,000,000,000,000,000,000,000,000,000,000,000,000,000,000,000,000,000,000,000,000,000,000,000,000,000,000,000,000,000,000,000,000,000,000,000,000,000,000,000,000,000,000,000					20_17958799_G_A;20_17955153_G_A;20_17955038_G_A;20_17953062_A_C;			0.465346535	False	False	False	True	False	False	15.0	18.0								1	1.82e-09
ENSG00000125877	ITPA	Q9BY32	Q9BY32	20_3213852_C_T	rs11087573	1.82e-10	5.53e-13	1	1.0200000000000002e-18	-0.964343539	1.57e-14	-0.956186345	1.48e-10	-0.675967922	6.27e-06	-0.434953295	True	202	19186144.15	0.22311711	10	0.185834968	False	3213852,3213372,3214581,3217695,3219561,3223713,3224819,3227845,3228423,3233943,3235494,3237232,3240723,3240970,3244098,3246418,3247922,3248760,3249020,3250007,3251248,3251924,3252242,3252347,3253143,3253831,3255905,3257194,3258188,3258874,3259142,3259165,3260368,3261006,3261068,3262493,3262824,3263636,3263685,3264267,3264292,3264438,3265029,3265779,3266327,3266548,3267133,3267736,3267911,3268817…								0.193069307	False	False	False	False	False	False	10.0	10.0	20_3381549	rs965469	IFN-related cytopenia	1.00E-09				35	1.8999999999999998e-26
ENSG00000126522	ASL	P04424	P04424	7_65518803_C_A	rs112712338	0.000158367	3.06e-06	1	6.03e-08	-0.352422096	1.7199999999999998e-05	-0.551535596	1.91e-12	-0.5563316620000001	1.9e-11	-0.446717446	True	202	14142495.83	0.186324402	20	0.126678619	False	65518803,65519896,65529950,65531842,65532516,65545329,65551931,65552614,65554352,65556307,65561555,65562588,65566082,65570310,65574827,65575137,65577346,65579292,65581996,65588220,65598939,65600873,65610614,65610989,65612197,65614257,65617971,65618674,65619205,65621004,65623848,65623933,65624353,65625122,65626051,65628999,65629717,65630150,65631361,65633305,65634151,65634168,65634321,65634481,656…					7_65556307_A_G;7_65554352_C_T;7_65552614_T_C;7_65551931_T_C;7_65545329_T_C;			0.29950495	False	False	False	True	False	False	19.0	19.0								3	2.76e-10
ENSG00000126777	KTN1	Q86UP2	Q86UP2	14_56059806_A_T	rs55760841	0.011531508	0.000240943	2	2.64e-08	0.384132224	0.00038818	0.494962586	5.39e-16	0.626946352	0.021103929	0.096469698	True	202	93188819.98	0.113736122	68	0.075487817	True	56059806,56027990,56035669,56041810,56045799,56049204,56053247,56053822,56060441,56062400,56072055,56074074,56074135,56076875,56077961,56079726,56081097,56081363,56082663,56086740,56089055,56089358,56092719,56093958,56098040,56098391,56101164,56101212,56101879,56104751,56105550,56106031,56106211,56108007,56108520,56109174,56111400,56111568,56112463,56113450,56113507,56114322,56114388,56114866,561…		14_56160125_A_ATTTG;14_56159380_CCT_C;14_56154756_ATTGT_A;14_56134623_CT_C;14_56131710_AT_A;14_56121256_ATT_A;14_56106031_TGAC_T;14_56101164_AAACT_A;14_56086740_T_TGGCT;14_56053822_C_CGT;			14_56166871_C_T;14_56163188_A_C;14_56160904_C_A;14_56160867_G_A;14_56160224_A_G;14_56160125_A_G;14_56160125_A_ATTTG;14_56159380_CCT_C;14_56159365_T_C;14_56158826_A_G;14_56156504_T_C;14_56155081_C_T;14_56154756_ATTGT_A;14_56154237_G_A;14_56153987_G_T;14_56151603_G_T;14_56149586_T_A;14_56148257_T_C;14_56148105_C_G;14_56147696_G_A;14_56145989_T_C;14_56145987_TTT_CTC;14_56145987_TTT_CTC;14_56145987_T…	14_56149586_T_A;14_56148257_T_C;14_56148105_C_G;14_56147696_G_A;14_56145989_T_C;14_56145987_TTT_CTC;14_56145987_TTT_CTC;14_56145987_T_C;14_56138800_G_A;14_56135049_C_T;14_56134755_C_G;14_56134623_CT_C;14_56133054_C_G;14_56131710_AT_A;14_56122689_G_A;14_56121427_C_T;14_56121256_ATT_A;14_56114866_A_T;14_56114388_A_G;14_56114322_G_A;14_56113507_G_A;14_56113450_A_T;14_56112463_C_A;14_56111568_A_G;14_…		0.257425743	False	True	False	True	False	False	62.0	68.0								1	1.29e-09
ENSG00000126787	DLGAP5	Q15398-3	Q15398-3	14_55819791_G_A	rs1045004	0.00505415	8.96e-05	2	3.19e-07	0.648529389	0.000291512	0.568921583	1.08e-07	0.435611748	2.37e-08	0.376044074	True	184	781556.1892	0.195390589	2	0.198322344	False	558,197,915,558,388,000,000,000,000,000,000,000,000,000,000,000,000,000,000,000,000,000,000,000,000,000,000,000,000,000,000,000,000,000,000,000,000,000,000,000,000,000,000,000,000,000,000,000,000,000,000,000,000,000,000,000					14_55633590_T_C;			0.168316832	False	False	False	True	False	False	2.0	2.0								0
ENSG00000126870	WDR60	Q8WVS4	Q8WVS4	7_158656809_T_A	rs844523	1.07e-07	8.76e-10	1	1.15e-16	-1.020990536	3.4e-10	-1.220975761	8.52e-14	-0.643009831	1.35e-08	-0.535534591	True	202	2255040.641	0.186072787	16	0.252186024	True	###############################################################################################################################################################################################################################################################		7_158676289_T_TAGAA;7_158663053_CTT_C;7_158659018_CTT_C;			7_158686626_T_A;7_158686337_C_T;7_158685496_G_A;7_158676289_T_TAGAA;7_158675425_A_G;7_158674521_C_G;7_158671116_G_A;7_158669037_A_G;7_158667437_C_T;7_158667179_C_T;7_158665987_C_T;7_158665221_T_G;7_158663242_C_G;7_158663053_CTT_C;7_158662840_A_G;7_158660977_G_T;7_158660923_C_T;7_158659020_T_C;7_158659018_CTT_C;7_158655534_T_C;7_158651731_A_G;7_158651087_G_A;7_158656809_T_A;	7_158686626_T_A;7_158686337_C_T;7_158685496_G_A;7_158676289_T_TAGAA;7_158675425_A_G;7_158674521_C_G;		0.198019802	False	True	False	True	False	False	16.0	16.0					Astle-W_mpv_EUR_2017	3.2599999999999972e-52	1.4499999999999966e-240	41	3.31e-79
ENSG00000126934	MAP2K2	P36507	P36507	19_4099187_T_C	rs350911	0.031851199	0.0017336779999999998	1	2.89e-06	-0.311052117	0.05075557	-0.51910511	9.82e-05	-0.31707955	4.56e-08	-0.461437914	True	202	16350460.87	0.143172115	11	0.107347424	True	409,918,740,987,764,000,000					19_4100660_G_A;19_4098776_A_G;19_4099187_T_C;			0.267326733	False	False	False	True	False	False	11.0	11.0								3	8.47e-11
ENSG00000127586	CHTF18	E7EXA6	E7EXA6	16_849166_C_A	rs2272900	1.81e-12	1.3800000000000001e-15	2	1.82e-19	0.990729742	9.509999999999999e-15	0.8692417640000001	1.26e-17	0.7842200770000001	3.19e-08	0.295411811	True	202	14067962.97	0.118394426	29	0.096662112	False	849,166,847,597,848,000,000,000,000,000,000,000,000,000,000,000,000,000					16_847597_T_C;			0.277227723	False	False	False	True	False	False	29.0	29.0	16_847597	rs2294450	Mean corpuscular hemoglobin		Astle-W_mch_EUR_2017;Astle-W_mcv_EUR_2017;Astle-W_rbc_EUR_2017	0.514203	5.479999999999986e-290	5	4.4e-11
ENSG00000128052	KDR	P35968	P35968	4_56011889_C_T	rs12331507	0.071473362	0.004902656	1	6.23e-06	0.42166134	4.12e-08	0.710028953	2.83e-16	0.682902138	6.34e-17	0.659147255	True	193	1936864.634	0.353771963	11	0.230365594	True	560,118,895,599,391,000,000,000,000,000,000,000,000,000,000,000,000,000,000,000,000,000,000,000,000,000,000,000,000,000,000,000,000,000,000,000,000,000,000,000,000,000,000,000,000,000,000,000,000,000,000,000,000,000,000,000								0.284653465	False	False	False	False	False	False	10.0	12.0	4_56008477	rs1903068	Endometriosis					0
ENSG00000128335	APOL2	J3KQL8	J3KQL8	22_36635756_G_A	rs5756111	0.006019788000000001	0.000225487	1	3.46e-06	-0.5496385460000001	0.000323214	-0.708120483	4.03e-05	-0.416340287	5.3799999999999986e-05	-0.385605934	True	201	1197261.944	0.2836178	6	0.367168079	False	36635756					22_36635756_G_A;			0.324257426	False	False	False	True	False	False	6.0	6.0								7	1.11e-25
ENSG00000128928	IVD	A0A0A0MT83	A0A0A0MT83	15_40705159_T_C	rs2289329	0.004290164	0.00014595	1	1.54e-07	0.466434353	3.72e-05	0.413570563	1.39e-18	0.5267659	2.05e-05	0.313783997	True	202	37454403.85	0.122269896	17	0.184264874	False	407,051,594,069,345,000,000,000,000,000,000,000,000,000,000,000,000,000,000,000,000,000,000,000					15_40721939_A_G;15_40720786_G_A;15_40715427_T_C;15_40714401_A_G;15_40710108_A_T;15_40703211_A_G;15_40700022_C_T;15_40705159_T_C;	15_40721939_A_G;15_40720786_G_A;15_40715427_T_C;15_40714401_A_G;15_40710108_A_T;15_40703211_A_G;15_40705159_T_C;		0.393564356	False	False	False	True	False	False	16.0	17.0	15_40700022;15_40703211;15_40703211	rs10518693;rs9635324;rs9635324	Metabolic traits;Blood metabolite levels;Blood metabolite ratios					15	1.44e-20
ENSG00000129219	PLD2	O14939-4	O14939-4	17_4712757_G_A	rs2286671	0.005598098	0.000202483	1	1.01e-06	0.501270113	0.000488407	0.8336307559999999	0.000458026	0.16828477100000006	0.120415646	0.110707313	True	202	3156592.562	0.228624862	14	0.216621159	False	47,127,574,713,895					17_4713895_G_A;17_4712757_G_A;	17_4713895_G_A;17_4712757_G_A;		0.309405941	False	False	False	True	False	False	12.0	14.0								14	5.39e-16
ENSG00000129282	MRM1	Q6IN84	Q6IN84	17_34849697_C_G	rs2277662	0.006026792	0.000226454	1	4.24e-06	-0.8146236090000001	0.000374088	-1.078237613	0.003040323	-0.519943716	0.00113056	-0.42832448	True	202	2014996.929	0.237816563	7	0.310631051	False	34,849,697,348,487,900,000,000,000,000,000								0.074257426	False	False	False	False	False	False	7.0	7.0								0
ENSG00000129347	KRI1	Q8N9T8	Q8N9T8	19_10664632_A_G	rs3087689	6.859999999999998e-09	4.06e-11	1	5.02e-14	-0.581863621	2.41e-06	-0.574275655	1.83e-22	-0.47462416	7.04e-06	0.223992641	True	202	8252645.123	0.161166729	18	0.229955599	False	1,066,463,210,649,940,000,000,000,000,000,000,000,000,000,000,000,000,000,000,000,000	19_10664632_A_G;				19_10676537_C_A;19_10669732_A_G;19_10669524_G_A;19_10667641_G_C;	19_10676537_C_A;		0.314356436	False	False	True	True	False	False	18.0	18.0					Astle-W_mch_EUR_2017;Astle-W_mcv_EUR_2017;Astle-W_pct_EUR_2017;Astle-W_plt_EUR_2017;Astle-W_rdw_EUR_2017	0.16398429999999994	0.123674	41	2.7399999999999994e-57
ENSG00000129595	EPB41L4A	Q9HCS5	Q9HCS5	5_111456684_T_C	rs4958001	0.093378317	0.006951728000000001	1	3.08e-05	0.559644137			0.032246418	0.193399878	0.6839474590000001	-0.028449871	False	106	1123665.388	0.282004433	1	0.50866063	False	111456684								0.358910891	False	False	False	False	False	False										0
ENSG00000130303	BST2	Q10589-2	Q10589-2	19_17522309_T_C	rs10406088	0.019592394	0.000937995	1	8.98e-07	0.435773648	5.07e-05	0.4741637970000001	5.91e-08	0.385936998	1.25e-08	0.403229659	True	202	7514002.414	0.378309344	4	0.422461325	False	17522309,17511446,17512230,17512412,17512913,17513926,17516620,17517174,17518018,17519487,17521101,17521417,17521691,17522607,17522869,17525029,17525080,17525420,17525503,17525586,17525921,17526531,17528495,17531650,17533754,17534898,17535188,17535867,17536982,17540113,17541370,17541371,17542947				19_17513926_G_C;				0.180693069	True	False	False	False	False	False	4.0	4.0								2	2.6e-12
ENSG00000130304	SLC27A1	Q6PCB7	Q6PCB7	19_17586086_G_A	rs28582369	0.006667691	0.000255219	1	1.66e-07	0.421011725	0.003249614	0.640430155	4.11e-09	0.277402208	7.330000000000001e-10	0.276498694	True	202	3054070.704	0.217386902	13	0.188987892	False	17586086					19_17586086_G_A;	19_17586086_G_A;		0.388613861	False	False	False	True	False	False	13.0	13.0								6	2.22e-14
ENSG00000130305	NSUN5	Q96P11-2	Q96P11-2	7_72679339_A_G	rs10949823	0.005737173000000001	0.000210871	1	8.84e-06	0.432628309	0.004800451	0.37984508	2.82e-12	0.8191624359999999	4.270000000000001e-07	0.389570374	True	202	18296692.08	0.125008926	20	0.163559188	False	72679339								0.222772277	False	False	False	False	False	False	16.0	20.0								0
ENSG00000130413	STK33	Q9BYT3	Q9BYT3	11_8520408_G_A	rs7118501	0.0577503	0.003650376	1	5.31e-06	0.384217267	8.83e-06	0.542592056	3.61e-09	0.645058166	0.002922395	0.30430592100000003	True	202	3141055.667	0.164158425	9	0.162548059	False	8,520,408,852,493,380,000,000,000,000					11_8539069_C_T;11_8524933_T_C;11_8520408_G_A;			0.247524752	False	False	False	True	False	False	9.0	9.0								23	1.11e-32
ENSG00000130544	ZNF557	Q8N988-2	Q8N988-2	19_7180804_T_C	rs7246290	0.051058814	0.0030727140000000003	1	2.48e-06	1.190768463			0.987694735	0.164565839	0.493688684	0.085066111	False	139	5606213.092	0.228515189	2	0.233896637	False	718,080,471,808,097,000,000								0.054455446	False	False	False	False	False	False	0.0	0.0								0
ENSG00000130731	C16orf13	Q96S19	Q96S19	16_616701_G_A	rs62030865	0.043884833	0.0025085660000000003	1	9.34e-06	0.374121901	0.117884766	0.332941864	0.010205801	0.320436179	7.240000000000001e-05	0.249465462	True	202	4589349.468	0.206891326	10	0.28625594	False	###############################################################################################################################################################################################################################################################								0.198019802	False	False	False	False	False	False	10.0	10.0	16_677020	rs34997977	Educational attainment (years of education)					18	1.8e-19
ENSG00000130762	ARHGEF16	Q5VV41	Q5VV41	1_3385139_G_T	rs2487673	0.023681855	0.001200309	1	2.51e-05	0.874448955	0.04287462	0.679884095	2.84e-05	0.733684895	3.5699999999999995e-08	0.8574365429999999	True	202	8377035.045	0.15526383	22	0.243111708	False	338,513,933,632,363,000,000,000,000,000,000,000,000,000,000,000,000,000,000,000,000,000,000,000,000,000,000,000				1_3385139_G_T;	1_3395388_C_G;1_3394640_A_G;1_3394121_G_T;1_3392326_A_G;1_3391022_G_A;1_3389321_C_T;1_3371470_G_C;1_3385139_G_T;			0.047029703	True	False	False	True	False	False	5.0	5.0								7	4.15e-14
ENSG00000131016	AKAP12	Q02952	Q02952	6_151565381_C_G		0.005630128000000001	0.00020496	1	2.98e-07	0.447252766	2.72e-05	0.522363564	0.011243707	0.205632622	1.33e-05	0.274945614	True	202	153614033.7	0.148930261	80	0.08396701599999999	True	151,565,381,151,551,000,000,000,000,000,000,000,000,000,000,000,000,000,000,000,000,000,000,000,000,000,000,000,000,000		6_151563473_TTC_T;			6_151566452_G_A;6_151565924_C_T;6_151564598_A_T;6_151564453_T_C;6_151563575_A_G;6_151563473_TTC_T;6_151561981_A_T;6_151565381_C_G;			0.396039604	False	True	False	True	False	False	79.0	80.0								0
ENSG00000131165	CHMP1A	F8VUA2	F8VUA2	16_89734349_T_C	rs447735	0.04056996	0.002293725	1	8.590000000000002e-07	-0.457550684	6.2e-06	-0.455402281	4.24e-11	-0.506376707	1.04e-11	-0.437778922	True	202	6593292.12	0.146524606	7	0.249226497	False	89734349,89698070,89698283,89698752,89699528,89699664,89700747,89700881,89702124,89702204,89706331,89708003,89708096,89708224,89708292,89708680,89709019,89710378,89711120,89712889,89713174,89715648,89716275,89716883,89716915,89717211,89717397,89717711,89722039,89727683,89729574,89730314,89730827,89731888,89732024,89732238,89737964,89738276,89740285,89740609,89741019,89742547,89743219,89746277,897…		16_89717211_C_CA;16_89715593_AGCCCTCAACCTCCCCACCCCACGCTGATCCAGCTTCCCTCAACCTCCCCACCCCGCGCTGATCCA_A;16_89713735_GTCACCTGAGACAGGAGAGAGCGCAGGAGGGAACAGGATGAAAGGCAAGTGGAGCTCACGCACCAGGGACGGGTCCCCTGGACTCTGACAGGAGAGCTGGGGCACCCCAACCCTGACCCACAAAACCCCAACTCTGGGCTGAGCCATCATCTGGGTCCTATGGAAAGACCACCAACTCGACGGAAAAGGCCATGGAGACCCAGTGCGGGGTCAGTGGAGAAAAGGCCGCCGACGTGGAGACCCAGTGCGGGGTCAGTGGAGAAAAGGCCGCCGACGTGGAGACCCAGTG…	16_89713735_GTCACCTGAGACAGGAGAGAGCGCAGGAGGGAACAGGATGAAAGGCAAGTGGAGCTCACGCACCAGGGACGGGTCCCCTGGACTCTGACAGGAGAGCTGGGGCACCCCAACCCTGACCCACAAAACCCCAACTCTGGGCTGAGCCATCATCTGGGTCCTATGGAAAGACCACCAACTCGACGGAAAAGGCCATGGAGACCCAGTGCGGGGTCAGTGGAGAAAAGGCCGCCGACGTGGAGACCCAGTGCGGGGTCAGTGGAGAAAAGGCCGCCGACGTGGAGACCCAGTGCGGGGTCGGTGGAGAAAAGGCCGCCGACGTGGGGACCCAGCGCGGGGTCGGTGGAGAAAAGGCCGCCGACGTGGGGACCCAGCGCGGGGTCGGTGGAG…	16_89712497_TGGAAACCAACAACAGGACTCGGGTCAGGGCAGGGGAAGGGGGCCTCTGACCACCACGTGCTCCCAGCACAGGTGACCCTTTTCCTCCTCAGTGTCCTGAGATAACATGAGTGACAGGCCTTGGAAACAGACATGCCCTGTCCCACTCTTACCTGATCTGTTAGGAAGGGTGCAGTATTCTAAAGTGTACTGCAGACGTGTGTAAACGCCATGCCTGACACACACTCAAGCCCCCACGCCAGCCGGAGCAGGACGGGGCAGCAGCAGGGCGGCTCGCTTGGGGGCGGCTGCAGCTGGGGCCTCTGAGTCGAGATCAGGGCTCCCTGGTCGGAGCCTCAGCCCAAGCTCTCCTCCAGCCTCTAACCCACAACCCTCTCTCCCTTCCCA…	16_89717711_G_A;16_89717397_A_G;16_89717211_C_CA;16_89716915_C_G;16_89716883_C_T;16_89716275_C_A;16_89715648_G_A;16_89715593_AGCCCTCAACCTCCCCACCCCACGCTGATCCAGCTTCCCTCAACCTCCCCACCCCGCGCTGATCCA_A;16_89713735_GTCACCTGAGACAGGAGAGAGCGCAGGAGGGAACAGGATGAAAGGCAAGTGGAGCTCACGCACCAGGGACGGGTCCCCTGGACTCTGACAGGAGAGCTGGGGCACCCCAACCCTGACCCACAAAACCCCAACTCTGGGCTGAGCCATCATCTGGGTCCTATGGAAAGACCACCAACTCGACGGAAAAGGCCAT…	16_89717711_G_A;16_89717397_A_G;16_89717211_C_CA;16_89716915_C_G;16_89716883_C_T;16_89716275_C_A;16_89715648_G_A;16_89715593_AGCCCTCAACCTCCCCACCCCACGCTGATCCAGCTTCCCTCAACCTCCCCACCCCGCGCTGATCCA_A;16_89713735_GTCACCTGAGACAGGAGAGAGCGCAGGAGGGAACAGGATGAAAGGCAAGTGGAGCTCACGCACCAGGGACGGGTCCCCTGGACTCTGACAGGAGAGCTGGGGCACCCCAACCCTGACCCACAAAACCCCAACTCTGGGCTGAGCCATCATCTGGGTCCTATGGAAAGACCACCAACTCGACGGAAAAGGCCAT…		0.415841584	True	True	False	True	True	False	7.0	7.0	16_89700881;16_89708096;16_89708292;16_89708292;16_89734349	rs2460448;rs154657;rs164748;rs164748;rs447735	Cardiovascular disease;Homocysteine levels;Glomerular filtration rate;Glomerular filtration rate in non diabetics (creatinine);Hemoglobin concentration		CKDGen_eGFRcrea-NDM_EUR_2016;CKDGen_eGFRcrea_EUR_2016	1.00903772	0.00903772	4	5.77e-18
ENSG00000131203	IDO1	P14902	P14902	8_39807281_T_C	rs4737171	0.098047016	0.007448496999999998	1	1.15e-05	-0.646197055	8.499999999999999e-05	-0.8446943859999999	8.19e-13	-0.921593447	1.62e-14	-0.941117826	True	202	7590629.763999999	0.480051453	11	0.395846443	False	3,980,728,139,821,710								0.081683168	False	False	False	False	False	False	11.0	11.0								0
ENSG00000131238	PPT1	P50897	P50897	1_40469584_C_T	rs10789071	0.052453758	0.003198926	1	2.12e-05	-0.383167718	0.266453133	-0.366561731	0.026616072	-0.175104806	0.000415116	-0.274545215	True	202	25018581.87	0.163335328	12	0.164663316	False	40469584								0.242574257	False	False	False	False	False	False	10.0	11.0								9	2.42e-13
ENSG00000131459	GFPT2	O94808	O94808	5_179726094_G_A	rs62404920	0.004290164	0.000146136	1	1.3e-08	-0.513889819	7.659999999999999e-05	-0.538209622	0.114655865	-0.236958921	0.010293622	-0.25371924	False	202	29173424.06	0.149058351	30	0.130916048	False	179,726,094,179,724,000								0.282178218	False	False	False	False	False	False	27.0	30.0								0
ENSG00000131470	PSMC3IP	Q9P2W1	Q9P2W1	17_40704008_C_G	rs2676532	2.52e-07	2.25e-09	1	4.66e-14	-0.7180281279999999	0.00012148	-0.42106607	1.1100000000000002e-08	-0.501993359	3.19e-10	-0.460394264	True	202	1518194.899	0.164727713	6	0.278707332	True	40704008,40698542,40703535,40704185,40704563,40705100,40705724,40706906,40707444,40707580,40710355,40710438,40711056,40711769,40711808,40714014,40714804,40715570,40716520,40719474,40720605,40721360,40721850,40723391,40724276,40725799,40727427,40728229,40730728,40730825,40732698,40735469,40737117,40738610,40740277,40742454,40742683,40744320,40744908,40745645,40746395,40748737,40749813,40750099,407…					17_40728229_C_T;17_40727427_C_G;17_40725799_C_T;	17_40728229_C_T;17_40727427_C_G;17_40725799_C_T;		0.45049505	False	False	False	True	False	False	6.0	6.0	17_40755811	rs9901225	Colorectal or endometrial cancer		Astle-W_wbc_EUR_2017;CARDIoGRAMplusC4D_CHD_Mixed_2015;CARDIoGRAMplusC4D_MI_Mixed_2015;GLGC_HDL_EUR_2013;IBDGC_IBD_EUR_2015;Nelson-CP_CAD_Mixed_2017	0.91101557	6.419999999999996e-87	4	2.31e-07
ENSG00000131778	CHD1L	Q86WJ1	Q86WJ1	1_146753471_A_T	rs12751595	2.24e-09	9.72e-12	1	5.4e-13	0.7093336570000001	2.06e-07	0.578761725	5.25e-08	0.589346383	4.23e-05	0.332987358	True	202	17928714.38	0.126827857	37	0.097390521	False	146,753,471,146,758,000,000,000,000,000,000,000,000,000,000,000,000,000,000,000,000		1_146758656_CCT_C;			1_146758656_CCT_C;1_146758656_C_A;1_146753471_A_T;			0.457920792	False	True	False	True	False	False	37.0	37.0								3	1.57e-07
ENSG00000131941	RHPN2	Q8IUC4	Q8IUC4	19_33642273_A_C	rs12327849	0.047335108	0.002775944	1	3.27e-05	-0.442520641	0.044537074	-0.280708469	0.241603667	-0.17364987699999998	0.007334439	-0.185433798	True	202	12526543.71	0.153036752	29	0.075317388	False	336,422,733,365,203,000,000,000,000,000,000,000,000,000,000,000,000,000,000,000,000,000,000,000								0.366336634	False	False	False	False	False	False	23.0	29.0								5	3.26e-10
ENSG00000132196	HSD17B7	P56937-3	P56937-3	1_162716143_A_C	rs1704738	2.59e-05	4.1e-07	1	1.65e-12	-0.821639239	3.42e-14	-0.813908298	3.22e-22	-1.010012482	1.1000000000000002e-19	-0.928464422	True	202	4882063.685	0.221336659	10	0.274362237	False	162,716,143,162,696,000,000,000,000,000,000,000,000,000,000,000,000,000,000,000,000,000,000,000,000,000,000,000,000,000,000,000,000,000,000,000,000,000,000,000,000,000,000,000,000,000,000,000		1_162765811_AT_A;1_162765636_AAGTCTTAGATGAAG_A;			1_162766476_C_T;1_162765811_AT_A;1_162765636_AAGTCTTAGATGAAG_A;	1_162766476_C_T;1_162765811_AT_A;1_162765636_AAGTCTTAGATGAAG_A;		0.222772277	False	True	False	True	False	False	10.0	10.0								2	1.77e-10
ENSG00000132199	ENOSF1	Q7L5Y1	Q7L5Y1	18_689818_C_T	rs11081272	0.001899526	5.460000000000001e-05	1	2.01e-08	0.629692889	1.01e-06	0.6301321529999999	2.77e-13	0.8327262440000001	0.004022442	0.211271691	True	193	1929716.222	0.387660609	7	0.489236948	False	689,818,677,931,680,000,000,000,000,000,000,000					18_692282_T_G;18_683441_G_A;18_680520_A_C;18_677931_C_G;18_689818_C_T;	18_692282_T_G;18_683441_G_A;18_680520_A_C;18_677931_C_G;18_689818_C_T;		0.183168317	False	False	False	True	False	False	7.0	7.0								8	1.0199999999999999e-21
ENSG00000132256	TRIM5	Q9C035	Q9C035	11_5701074_C_A	rs11601507	0.01718424	0.000796554	1	7.87e-06	0.904854773	0.000194086	1.576232616	0.546950478	0.381020554	0.225724256	-0.202684288	False	195	2004194.174	0.230243269	7	0.40147011	False	5701074	11_5701074_C_A;					11_5701074_C_A;		0.064356436	False	False	True	False	False	False	3.0	3.0	11_5701074;11_5701074;11_5701074	rs11601507;rs11601507;rs11601507	Coronary artery disease;Low density lipoprotein cholesterol levels;Mean platelet volume		Astle-W_mpv_EUR_2017;van-der-Harst-P_CAD-UKBB_Mixed_2018;van-der-Harst-P_CAD_Mixed_2018	0.000422232	0.0	0
ENSG00000132275	RRP8	O43159	O43159	11_6615187_A_T	rs4758436	0.061797191	0.004079786	1	2.33e-06	0.387736557	0.0016764120000000002	0.4973491920000001	0.003413924	0.281239093	4.7800000000000005e-08	0.389718679	True	202	6804741.5989999985	0.140075433	15	0.124997484	False	6,615,187,660,052,660,000,000,000,000					11_6622857_G_A;	11_6622857_G_A;		0.477722772	False	False	False	True	False	False	14.0	15.0								17	2.77e-20
ENSG00000132305	IMMT	Q16891-2	Q16891-2	2_86312176_C_T	rs12714167	2.05e-07	4.37e-10	4	2.27e-16	-0.518888088	3.410000000000001e-09	-0.456809656	3.94e-18	-0.417602088	5.04e-23	-0.783848742	True	202	113412892.4	0.14520430199999998	44	0.16436619	True	86312176,86216343,86219227,86225535,86227341,86239346,86241607,86244704,86254268,86258784,86259741,86270966,86271073,86272191,86274890,86275985,86277308,86296413,86301305,86301978,86307128,86311485,86313182,86316382,86317735,86322071,86324760,86339331,86341328,86360225,86365607,86371012,86371883,86372188,86375470,86375748,86375999,86376474,86377143,86377549,86378292,86379882,86380113,86381063,863…		2_86410758_TC_T;2_86409997_AC_A;2_86409883_ACTTGAG_A;2_86404371_CT_C;2_86388604_CTT_C;2_86387751_C_CAAATAACTA;2_86375999_GTATT_G;2_86375998_AGTAT_A;2_86372188_C_CAGGCAGT;		2_86422816_T_G;2_86422660_C_T;2_86422073_G_C;	2_86422421_T_G;2_86422416_T_C;2_86422073_G_C;2_86421702_T_C;2_86421507_G_A;2_86421332_G_A;2_86421209_G_A;2_86420255_G_A;2_86419932_C_G;2_86419602_A_C;2_86418955_A_G;2_86417975_A_G;2_86417908_C_T;2_86416915_T_C;2_86415573_A_G;2_86414984_G_A;2_86414870_C_T;2_86414853_G_C;2_86414283_T_C;2_86412251_C_T;2_86411607_G_A;2_86411275_G_A;2_86410758_TC_T;2_86410715_A_G;2_86410069_A_T;2_86409998_C_A;2_864099…	2_86422421_T_G;2_86422416_T_C;2_86422073_G_C;2_86421702_T_C;2_86421507_G_A;2_86421332_G_A;2_86421209_G_A;2_86420255_G_A;2_86419932_C_G;2_86419602_A_C;2_86418955_A_G;2_86417975_A_G;2_86417908_C_T;2_86416915_T_C;2_86415573_A_G;2_86414984_G_A;2_86414870_C_T;2_86414853_G_C;2_86414283_T_C;2_86412251_C_T;2_86411607_G_A;2_86411275_G_A;2_86410758_TC_T;2_86410715_A_G;2_86410069_A_T;2_86409998_C_A;2_864099…		0.477722772	True	True	False	True	False	False	41.0	44.0	2_86341328	rs10184246	Lung function (FEV1/FVC)					35	2.78e-45
ENSG00000132376	INPP5K	Q9BT40-2	Q9BT40-2	17_1420714_G_C	rs113289613	0.091002116	0.006710913000000001	1	7.79e-06	-0.629561794	0.00027347	-0.762908613	0.009673461	-0.39921537	0.228196617	-0.136464492	True	202	2917866.799	0.18608538	8	0.16527209699999998	True	1420714,1404025,1405395,1405415,1405533,1405546,1408601,1409887,1410259,1410393,1410441,1411158,1411597,1414143,1416241,1424012,1424015,1425064,1425145,1426098,1426233,1426444,1426967,1427083,1428149,1428250,1428323,1429585,1429619,1429631,1429792,1430112,1430349,1430412,1430514,1431514,1431819,1432301,1432684,1433665,1433758,1434302,1434578,1434958,1435111,1435203,1435359,1435700,1436250,1436581…					17_1416241_C_T;17_1414143_C_T;17_1411597_C_T;17_1411158_T_G;17_1410441_C_T;17_1410393_A_C;17_1410259_C_G;17_1409887_G_A;17_1408601_G_A;17_1405546_G_A;17_1405533_C_T;17_1405415_G_A;17_1405395_G_A;17_1404025_T_C;			0.106435644	False	False	False	True	False	False	7.0	8.0								4	1.89e-10
ENSG00000132394	EEFSEC	P57772	P57772	3_128030474_C_T	rs73197383	0.01276756	0.000551472	1	7.609999999999998e-07	-0.653018121	1.97e-05	-0.623974114	1.07e-09	-0.6704704029999999	3.67e-10	-0.632597608	True	202	13148306.35	0.111404408	22	0.188713636	False	128030474,127715196,127809616,127810145,127810445,127810738,127812037,127812349,127812792,127813811,127814077,127814457,127815670,127816433,127817022,127817478,127817955,127818869,127820846,127822021,127824659,127824778,127825078,127826579,127828456,127828631,127828968,127829879,127831038,127833231,127833353,127833850,127834695,127837508,127838630,127840025,127840447,127840510,127841060,127841098…		3_128064819_TATA_T;3_128064818_TTA_T;3_128055663_AT_A;3_128046134_TCCC_T;3_128021361_TA_T;3_128016613_T_TAA;3_127986629_CAAC_C;3_127983996_C_CACTG;3_127976912_A_AAAG;3_127954324_T_TA;			3_128067441_G_T;3_128067275_T_C;3_128065815_T_C;3_128065466_C_T;3_128065313_C_T;3_128064819_TATA_T;3_128064818_TTA_T;3_128062070_G_A;3_128061922_G_T;3_128061689_C_T;3_128059293_A_C;3_128056897_G_A;3_128055663_AT_A;3_128053487_G_T;3_128050614_A_G;3_128047236_G_A;3_128047009_G_C;3_128046140_CCCCC_CT;3_128046134_TCCC_T;3_128044372_C_T;3_128043920_G_T;3_128043050_C_A;3_128043004_G_C;3_128042877_G_A;3…		3_127983495_T_C;3_127872602_A_G;3_127872506_C_T;	0.131188119	False	True	False	True	False	True	18.0	20.0	3_127715196;3_127809616;3_127810445;3_127810738;3_127812037;3_127812792;3_127813811;3_127813811;3_127814077;3_127814457;3_127814457;3_127815670;3_127816433;3_127817022;3_127817478;3_127817955;3_127818869;3_127820846;3_127822021;3_127824778;3_127825078;3_127826579;3_127828456;3_127828631;3_127828968;3_127829879;3_127829879;3_127831038;3_127833231;3_127833353;3_127834695;3_127837508;3_127838630;3_1…	rs17282209;rs35724792;rs34403909;rs13060453;rs13091198;rs55684215;rs35515217;rs35515217;rs36069551;rs11714052;rs11714052;rs11709377;rs34228187;rs34562493;rs6787614;rs11720239;rs34709844;rs11715661;rs55777628;rs67674204;rs34955225;rs35804055;rs13082038;rs13062252;rs60387553;rs35421223;rs35421223;rs33998546;rs35947214;rs67940364;rs6785535;rs34545799;rs11707462;rs138573550;rs112434347;rs35531186;rs6…	Post bronchodilator FEV1;Post bronchodilator FEV1;Post bronchodilator FEV1;Post bronchodilator FEV1;Post bronchodilator FEV1;Post bronchodilator FEV1;Post bronchodilator FEV1;Post bronchodilator FEV1/FVC ratio;Post bronchodilator FEV1;Post bronchodilator FEV1;Post bronchodilator FEV1/FVC ratio;Post bronchodilator FEV1;Post bronchodilator FEV1;Post bronchodilator FEV1;Post bronchodilator FEV1;Post…					10	1.93e-11
ENSG00000132406	TMEM128	D3DVS1	D3DVS1	4_4242527_G_A	rs13146382	0.000270766	5.93e-06	1	2.27e-10	-1.015905191			0.448305378	-0.08157933	0.501388772	-0.07974287099999999	False	202	1115161.799	0.292157707	1	0.5054781939999999	False	424,252,742,358,994,000,000	4_4249884_G_T;			4_4249884_G_T;	4_4242527_G_A;			0.094059406	True	False	True	True	False	False	0.0	0.0								0
ENSG00000132470	ITGB4	P16144	P16144	17_73717421_C_G	rs16967277	0.018203902	0.000858735	1	8.43e-07	0.430163595	7.52e-06	1.110313279	5.03e-23	0.853507692	4.01e-29	0.990187277	True	193	565114.0658	0.378682488	7	0.238961577	True	737,174,217,368,202,000,000,000,000,000,000,000,000,000,000,000,000,000,000,000,000,000,000,000,000,000,000,000,000,000,000,000,000,000,000,000,000,000,000,000				17_73717421_C_G;	17_73729445_C_A;17_73724941_G_A;17_73723239_G_A;			0.378712871	True	False	False	True	False	False	7.0	7.0								2	1.76e-08
ENSG00000132541	HRSP12	P52758	P52758	8_99115359_A_G	rs1462977	0.012663643	0.000545502	1	1.74e-06	-0.324164718	5.79e-06	-0.383859629	3.76e-10	-0.468191046	2.11e-10	-0.3734366670000001	True	202	16069680.8	0.204387902	6	0.311081039	False	991,153,599,910,263,000,000,000,000,000,000,000,000,000,000,000,000,000,000,000,000,000,000,000		8_99127120_AT_A;			8_99127120_AT_A;8_99119820_T_C;8_99118622_A_C;8_99115359_A_G;			0.358910891	False	True	False	True	False	False	6.0	6.0	8_99115359	rs1462977	Blood protein levels	2.00E-39				7	1.08e-11
ENSG00000132600	PRMT7	Q9NVM4-3	Q9NVM4-3	16_68335392_T_C	rs11350	3.99e-05	6.87e-07	1	2.53e-11	0.909138323	1.92e-07	0.862847347	3.4900000000000003e-20	1.129813813	1.26e-24	1.089717217	True	202	3753799.662	0.166877079	10	0.229239116	False	68335392,68323647,68324210,68336125,68339790,68340085,68344363,68350219,68351596,68352808,68353983,68356734,68359679,68361974,68364358,68365363,68368770,68369213,68369959,68372730,68376811,68377520,68378341,68378985,68379860,68381516,68382716,68384837,68387457,68390099,68395061,68395675,68395952,68396119,68397775,68398111,68398862,68399421,68399590,68402649,68409535	16_68387457_C_G;	16_68365363_TTTG_T;		16_68387457_C_G;	16_68390099_C_A;16_68384837_G_A;16_68381516_G_A;16_68379860_C_T;16_68378985_G_T;16_68378341_C_T;16_68377520_C_T;16_68376811_G_A;16_68372730_G_A;16_68369959_C_T;16_68369213_T_C;16_68368770_G_T;16_68365363_TTTG_T;16_68364358_C_G;16_68361974_T_G;16_68359679_G_A;16_68356734_G_C;16_68353983_C_T;16_68352808_G_C;16_68351596_G_A;16_68350219_C_T;	16_68390099_C_A;16_68387457_C_G;16_68384837_G_A;16_68381516_G_A;16_68379860_C_T;16_68378985_G_T;16_68378341_C_T;16_68377520_C_T;16_68376811_G_A;16_68372730_G_A;16_68369959_C_T;16_68369213_T_C;16_68368770_G_T;16_68365363_TTTG_T;16_68364358_C_G;16_68361974_T_G;16_68359679_G_A;16_68356734_G_C;16_68353983_C_T;16_68352808_G_C;16_68351596_G_A;16_68350219_C_T;	16_68387457_C_G;	0.123762376	True	True	True	True	False	True	9.0	9.0					Astle-W_hct_EUR_2017;Astle-W_hgb_EUR_2017;GLGC_HDL_EUR_2013	0.001376095	1.699999999999998e-139	29	1.03e-24
ENSG00000132906	CASP9	P55211	P55211	1_15831460_T_C	rs4646049	0.002508229	7.46e-05	1	1.15e-07	-0.597516301	5.4600000000000006e-09	-0.807155925	8.84e-23	-1.337656942	2.02e-22	-1.112446967	True	202	2063668.311	0.258642047	6	0.266336841	True	15,831,460,158,343,600,000,000,000,000,000			1_15834360_A_G;		1_15834360_A_G;1_15831460_T_C;	1_15834360_A_G;1_15831460_T_C;		0.108910891	False	False	False	True	True	False	5.0	6.0								3	1.39e-10
ENSG00000133318	RTN3	O95197-2	O95197-2	11_63549660_C_T	rs555395	0.001898894	1.36e-05	4	1.25e-08	-0.574245961	0.650931253	-0.393565033	0.107958523	-0.294071793	0.115670053	-0.11731111	False	202	9183184.081	0.321790574	11	0.259769064	True	63549660,63381458,63382002,63382379,63383853,63386750,63388296,63389797,63390037,63391031,63393243,63395639,63396384,63398495,63399175,63400493,63405467,63407062,63407218,63408222,63409369,63409664,63410021,63410985,63411840,63412071,63412880,63413028,63413781,63413962,63414451,63416313,63417724,63417805,63418922,63419001,63419880,63420443,63420797,63420897,63421767,63422204,63423435,63428668,634…	11_63449125_C_A;	11_63527191_AT_A;11_63509109_CT_C;11_63508900_C_CGACCTT;11_63494953_AAG_A;11_63483130_AAAAAAACACAC_A;11_63470164_GT_G;11_63460411_GAGAA_G;11_63452909_A_AGT;		11_63527191_AT_A;11_63526701_G_A;	11_63525258_G_C;11_63524232_A_G;11_63523838_C_T;11_63516916_A_G;11_63515752_A_C;11_63510399_T_C;11_63509109_CT_C;11_63508920_C_T;11_63508900_C_CGACCTT;11_63508334_T_C;11_63505516_C_T;11_63504649_G_A;11_63503885_C_T;11_63499156_C_T;11_63494953_AAG_A;11_63493919_G_A;11_63491268_A_G;11_63491250_A_G;11_63484688_T_G;11_63483384_T_G;11_63483191_G_A;11_63483130_AAAAAAACACAC_A;11_63482038_G_A;11_63478360…	11_63525258_G_C;11_63524232_A_G;11_63523838_C_T;11_63516916_A_G;11_63515752_A_C;11_63510399_T_C;11_63509109_CT_C;11_63508920_C_T;11_63508900_C_CGACCTT;11_63508334_T_C;11_63505516_C_T;11_63504649_G_A;11_63503885_C_T;11_63499156_C_T;11_63494953_AAG_A;11_63493919_G_A;11_63491268_A_G;11_63491250_A_G;11_63484688_T_G;11_63483384_T_G;11_63483191_G_A;11_63483130_AAAAAAACACAC_A;11_63482038_G_A;11_63478360…		0.158415842	True	True	True	True	False	False	5.0	10.0								4	1.52e-08
ENSG00000133636	NTS	P30990	P30990	12_86290735_C_T	rs73177142	4.42e-06	5.63e-08	1	3.65e-11	0.950781339	1.32e-09	0.978265798	7.0799999999999995e-28	1.075082777	7.92e-29	1.0655383040000002	True	129	369521.1862	0.5305815220000001	2	0.491172442	False	86290735,86216905,86222747,86230284,86233571,86234821,86235433,86237760,86240483,86241015,86241274,86242430,86243605,86246971,86250765,86253029,86253126,86256295,86258159,86262133,86262561,86262955,86268015,86268483,86270629,86272378,86288138,86291121,86291728,86292351,86292574,86293716,86294163,86297680,86325020,86330333,86330848,86336023,86338331,86341676,86344785		12_86270629_GT_G;			12_86272378_A_T;12_86270629_GT_G;12_86268483_C_T;			0.274752475	False	True	False	True	False	False	2.0	2.0								2	1.97e-05
ENSG00000133731	IMPA1	P29218	P29218	8_82553983_A_G	rs2975935	5.44e-08	4.27e-10	1	5.62e-17	-0.627902309	5.740000000000001e-12	-0.6866288220000001	1.53e-19	-0.6973274	1.83e-22	-0.8776050259999999	True	202	16688201.19	0.179662388	14	0.294864414	False	8,255,398,382,565,200,000,000,000,000,000,000,000,000				8_82570631_C_T;	8_82583771_G_T;8_82575783_C_T;	8_82583771_G_T;8_82575783_C_T;		0.252475248	True	False	False	True	False	False	14.0	14.0								31	5.13e-58
ENSG00000133789	SWAP70	Q9UH65	Q9UH65	11_9771687_G_C	rs6483656	5.14e-06	6.67e-08	1	9.29e-11	-0.444864959	0.000505165	-0.412415991	3.27e-08	-0.440874085	1.08e-10	-0.447012073	True	202	28345621.48	0.130485215	31	0.159620086	False	9,771,687,975,075,790,000,000,000,000,000,000,000,000,000,000,000,000,000,000,000,000,000,000,000,000,000,000,000,000,000	11_9769562_C_G;			11_9771687_G_C;	11_9770910_T_C;11_9765503_A_T;11_9750757_A_T;			0.329207921	True	False	True	True	False	False	29.0	31.0	11_9765503;11_9769562;11_9769562;11_9769562;11_9769562;11_9769562;11_9769562;11_9769562;11_9775091	rs4910498;rs415895;rs415895;rs415895;rs415895;rs415895;rs415895;rs415895;rs360139	Mean arterial pressure;Blood protein levels;Cardiovascular disease;High light scatter reticulocyte percentage of red cells;Mean corpuscular hemoglobin concentration;Red cell distribution width;Reticulocyte count;Reticulocyte fraction of red cells;Ischemic stroke		Astle-W_hlr-p_EUR_2017;Astle-W_mchc_EUR_2017;Astle-W_pct_EUR_2017;Astle-W_pdw_EUR_2017;Astle-W_rdw_EUR_2017;Astle-W_ret-p_EUR_2017;CARDIoGRAMplusC4D_CHD_Mixed_2015;MAGIC_HbA1c_EUR_2017;Nelson-CP_CAD_Mixed_2017;van-der-Harst-P_CAD-UKBB_Mixed_2018	0.5	7.609999999999994e-66	4	8.57e-11
ENSG00000133943	C14orf159	Q7Z3D6-2	Q7Z3D6-2	14_91622583_G_A	rs28548905	1.1000000000000002e-19	5.1399999999999997e-23	1	1.7199999999999995e-31	-1.1348834490000002	1.74e-22	-1.219129235	1.18e-29	-0.814536371	0.000218599	0.224223314	True	202	6884030.861000001	0.320407979	14	0.184896029	False	9,162,258,391,619,960,000,000,000,000,000,000,000,000,000,000,000,000,000,000,000,000	14_91636532_C_T;	14_91623533_GGATA_G;	14_91636532_C_T;		14_91643173_T_A;14_91636532_C_T;14_91636395_C_T;14_91631360_G_A;14_91623533_GGATA_G;14_91621154_A_G;14_91619960_G_T;14_91622583_G_A;	14_91643173_T_A;14_91636532_C_T;14_91636395_C_T;14_91631360_G_A;14_91623533_GGATA_G;14_91621154_A_G;14_91619960_G_T;14_91622583_G_A;	14_91636395_C_T;	0.30198019800000003	False	True	True	True	True	True	14.0	14.0								2	5.9e-09
ENSG00000133985	TTC9	Q92623	Q92623	14_71113775_T_A	rs61980466	0.069148117	0.00472697	1	5.35e-06	0.487190263	3.33e-05	0.497449938	1.24e-08	0.4084296670000001	9.15e-08	0.395160706	True	202	1962368.96	0.226748367	5	0.163364714	False	7,111,377,571,111,360,000,000,000,000,000,000,000,000,000,000,000,000,000,000,000,000					14_71129394_T_C;14_71129254_T_C;14_71127107_A_G;14_71126041_G_A;14_71124837_T_C;14_71114888_G_A;14_71111361_A_G;14_71113775_T_A;			0.195544554	False	False	False	True	False	False	5.0	5.0								0
ENSG00000134146	DPH6	Q7L8W6	Q7L8W6	15_35573576_C_T	rs1842557	0.07187340099999999	0.004938509000000001	1	3.09e-06	-0.362207593	0.001282088	-0.406583569	0.017980193999999998	-0.296290505	0.000396362	-0.318268667	True	202	7567078.89	0.184259294	12	0.130788774	False	35573576,35556005,35568111,35576319,35586647,35591698,35616724,35620293,35623265,35623766,35624317,35624988,35625294,35627127,35628066,35628552,35628659,35630947,35631371,35631573,35632454,35634658,35634865,35635848,35638312,35639627,35640782,35646414,35649032,35652441,35652696,35653713,35656842,35660394,35661084,35661258,35661497,35668874,35671418,35673316,35676310,35676859,35676868,35677902,356…		15_35690729_TGA_T;15_35684609_GA_G;15_35684221_TTC_T;15_35676868_AAAAT_A;			15_35726306_T_C;15_35721240_A_C;15_35718964_G_A;15_35716935_A_C;15_35713987_C_T;15_35707096_C_T;15_35706811_C_T;15_35702837_C_T;15_35700403_T_C;15_35693940_G_A;15_35691129_T_G;15_35691002_A_G;15_35690729_TGA_T;15_35689511_C_T;15_35686958_C_T;15_35685143_C_G;15_35684609_GA_G;15_35684271_T_G;15_35684221_TTC_T;15_35683059_C_T;15_35677902_T_C;15_35676868_AAAAT_A;15_35676859_T_C;15_35676310_C_T;15_356…			0.304455446	False	True	False	True	False	False	11.0	12.0								7	2.67e-11
ENSG00000134330	IAH1	Q2TAA2	Q2TAA2	2_9553163_G_A	rs11692768	9.03e-07	9.51e-09	1	1.51e-11	0.806080735	7.029999999999999e-11	0.884820705	7.620000000000001e-16	0.965418716	1.4999999999999996e-24	1.15291954	True	200	1161259.665	0.428340942	4	0.384238323	False	9553163,9546805,9549753,9549975,9550041,9550880,9551851,9551919,9555692,9557636,9558614,9559590,9559750,9560346,9560372,9560413,9561039,9561505,9561990,9562263,9562294,9564534,9564823,9567444,9569123,9573113,9573666,9575793,9576771,9581666,9582842,9583044,9583822,9585705,9585852,9587180,9587434,9588091,9588691,9591277,9602747,9614218,9617309,9618133,9626004,9629731,9632802,9637403,9644652,9647859…				2_9629731_T_C;	2_9632802_T_C;2_9629731_T_C;2_9626004_A_G;2_9618133_T_C;2_9617309_C_A;2_9614218_G_T;	2_9626004_A_G;2_9618133_T_C;2_9617309_C_A;		0.183168317	True	False	False	True	False	False	4.0	4.0								7	3.4900000000000004e-11
ENSG00000134363	FST	P19883-2	P19883-2	5_52858896_A_T	rs112764315	0.077357534	0.005427525	1	5.86e-06	-0.410240868	8.56e-05	-0.41493353	1.350281892	-0.044336654	0.380233076	0.034805074	False	168	552736.1607	0.335272256	1	0.49389987	False	5,285,889,652,871,860,000,000,000,000,000,000,000,000,000,000,000,000,000,000,000,000,000,000,000,000,000,000,000,000,000,000,000,000,000,000,000,000								0.304455446	False	False	False	False	False	False	1.0	1.0								0
ENSG00000134463	ECHDC3	Q96DC8	Q96DC8	10_11797758_G_A		0.000268253	5.81e-06	1	3.44e-09	0.714859548	9.02e-07	0.815066167	0.000448169	0.444587023	5.86e-05	0.4235506670000001	True	202	5497824.612000002	0.304055913	7	0.309996871	False	117,977,581,178,497,000,000,000,000,000,000,000,000,000,000,000,000,000,000,000,000,000,000,000,000,000,000,000,000,000,000,000,000,000,000,000,000,000,000,000,000,000,000,000,000,000,000,000		10_11804067_GA_G;10_11784971_CACTGGGCCTCCAGTC_C;			10_11804733_T_C;10_11804582_A_G;10_11804197_A_G;10_11804067_GA_G;10_11800229_T_G;10_11797220_G_A;10_11789637_G_A;10_11785767_T_C;10_11785247_A_G;10_11784978_C_T;10_11784971_CACTGGGCCTCCAGTC_C;10_11797758_G_A;			0.30198019800000003	False	True	False	True	False	False	7.0	7.0								14	1.19e-18
ENSG00000134905	CARS2	Q9HA77	Q9HA77	13_111345612_C_T	rs72661697	6.85e-09	3.93e-11	1	2.1899999999999997e-15	-1.3802373019999998	1.11e-10	-1.483686855	6.1e-07	-0.530364536	0.003344623	-0.474190226	True	202	4356790.723	0.163716602	14	0.185763984	False	111,345,612,111,318,000,000,000,000,000,000,000,000,000,000,000,000,000,000,000,000,000,000,000,000,000,000,000,000,000,000,000,000,000,000,000,000,000,000,000,000,000,000,000,000,000,000,000,000,000,000,000,000,000,000,000,000,000,000,000	13_111340101_T_A;	13_111348623_GTA_G;13_111329678_CCCACCACGGGGACCCAGTCACCCCCACCACGGAAACACAGAAAATCACCCCACCATGGAAACCCAGACAGTCACCC_C;		13_111340101_T_A;	13_111349894_C_A;13_111349334_T_C;13_111348760_C_T;13_111348623_GTA_G;13_111348288_T_C;13_111346454_A_C;13_111335108_G_A;13_111334714_G_A;13_111332688_C_T;13_111331858_C_T;13_111331398_G_T;13_111329741_C_T;13_111329678_CCCACCACGGGGACCCAGTCACCCCCACCACGGAAACACAGAAAATCACCCCACCATGGAAACCCAGACAGTCACCC_C;13_111328765_C_T;13_111326963_C_T;13_111323305_G_T;13_111320618_C_T;13_111320616_C_T;13_111318160_C_…	13_111349894_C_A;13_111349334_T_C;13_111348760_C_T;13_111348623_GTA_G;13_111348288_T_C;13_111346454_A_C;13_111340101_T_A;13_111335108_G_A;13_111334714_G_A;13_111332688_C_T;13_111331858_C_T;13_111331398_G_T;13_111329741_C_T;13_111329678_CCCACCACGGGGACCCAGTCACCCCCACCACGGAAACACAGAAAATCACCCCACCATGGAAACCCAGACAGTCACCC_C;13_111345612_C_T;		0.071782178	True	True	True	True	False	False	11.0	11.0					Phelan-M_HGSOC_EUR_2017;Phelan-M_Invasive-ovarian-cancer_EUR_2017;Phelan-M_Serous-Invasive-Ovarian-Cancer_EUR_2017;van-der-Harst-P_CAD_Mixed_2018	0.217149	0.0	28	7.17e-26
ENSG00000135040	NAA35	Q5VZE5	Q5VZE5	9_88365030_A_T	rs11141087	0.053864699	0.003322802	1	1.64e-05	-0.390412119	0.005747533000000001	-0.40227634	0.5721271529999999	-0.074042019	0.304058746	-0.071290223	False	202	10735852.36	0.089526988	21	0.106223543	False	88365030								0.396039604	False	False	False	False	False	False	17.0	21.0								0
ENSG00000135052	GOLM1	Q8NBJ4	Q8NBJ4	9_88692838_G_A	rs2183126	0.010960176	0.000456727	1	3.66e-07	0.7221377920000001	7.53e-05	0.751868029	3.68e-07	0.72181687	7.04e-06	0.734258779	True	202	17280673.38	0.167321233	15	0.12215513	False	886,928,388,867,399,000,000,000,000,000,000,000,000,000,000,000					9_88714593_C_A;9_88695977_A_T;9_88692255_C_T;9_88686944_A_G;9_88673997_C_T;9_88692838_G_A;	9_88692255_C_T;9_88686944_A_G;9_88673997_C_T;9_88692838_G_A;		0.089108911	False	False	False	True	False	False	12.0	13.0								1	2.55e-08
ENSG00000135070	ISCA1	Q9BUE6	Q9BUE6	9_88927549_A_G	rs4400467	0.003536079	5.69e-05	2	2.89e-08	-0.490847879	1.76e-06	-0.445509516	1.24e-20	-0.732209667	1.0999999999999999e-25	-0.7814815390000001	True	202	4337685.114	0.172409917	6	0.160199512	False	88927549								0.378712871	False	False	False	False	False	False	6.0	6.0								0
ENSG00000135249	RINT1	Q6NUQ1	Q6NUQ1	7_105161839_A_G		0.069729574	0.00477488	1	2.05e-05	-0.400212196	0.010307551	-0.392078131	1.15e-05	-0.284799314	8.359999999999999e-10	-0.5894192979999999	True	202	4091924.24	0.140269762	10	0.090540474	True	105161839,105147150,105147309,105147587,105147639,105147821,105148092,105148460,105149419,105149707,105149743,105150255,105150469,105151272,105151770,105152040,105152072,105152173,105152187,105152528,105152545,105152793,105152887,105153535,105153567,105153943,105154057,105154771,105154879,105155352,105155890,105156871,105156948,105157294,105157768,105158228,105158526,105159461,105159551,105159955…					7_105184415_C_T;7_105175415_T_C;	7_105184415_C_T;7_105175415_T_C;		0.188118812	False	False	False	True	False	False	9.0	10.0								1	1.44e-06
ENSG00000135372	NAT10	Q9H0A0	Q9H0A0	11_34139217_G_A	rs58696677	0.023053096	0.001151387	1	1e-06	-0.480709731	0.001758095	-0.5038738420000001	0.00024327	-0.284378442	4.6e-07	-0.388444276	True	202	85300423.88	0.108294107	49	0.089002206	False	34139217					11_34139217_G_A;			0.126237624	False	False	False	True	False	False	41.0	49.0								6	6.21e-09
ENSG00000135596	MICAL1	Q8TDZ2	Q8TDZ2	6_109982728_T_C		0.030918801	0.001679307	1	1.44e-05	-0.444966894	0.001704344	-0.877452494	1.41e-05	-0.472614278	2.62e-06	-0.306944328	True	202	15606409.52	0.160193248	36	0.162947599	True	109982728								0.173267327	False	False	False	False	False	False	33.0	35.0								0
ENSG00000135636	DYSF	O75923-14	O75923-14	2_71688123_G_A	rs11898122	0.012601408	0.000539871	1	2.99e-08	-0.571604357	1.3e-05	-0.776829097	1.4400000000000002e-09	-0.5114007	5.49e-15	-0.61753511	True	202	8185218.169	0.190035882	41	0.118332173	True	716,881,237,168,813,000,000,000,000,000,000,000,000,000,000,000					2_71690860_G_A;2_71688623_G_A;2_71688588_G_A;2_71688294_C_T;2_71688136_G_A;2_71688123_G_A;			0.294554455	False	False	False	True	False	False	38.0	41.0								0
ENSG00000135778	NTPCR	Q5TDF0	Q5TDF0	1_233070803_T_C	rs12410594	0.0001217	1.15e-06	2	5.15e-11	-0.939675526	6.57e-13	-1.0850330190000002	5.29e-08	-0.855183192	2.55e-07	-0.578872456	True	202	12972968.65	0.219473226	9	0.101877949	False	233,070,803,233,089,000,000,000,000,000,000,000,000,000,000			1_233091463_T_A;	1_233114608_C_T;	1_233105001_T_G;1_233089728_C_T;		1_233091463_T_A;	0.096534653	True	False	False	True	True	True	9.0	9.0								28	2.71e-54
ENSG00000135912	TTLL4	E7EX20	E7EX20	2_219357742_A_T	rs496908	0.026221518	0.000676507	2	9.26e-06	-0.355311867	0.054264769	-0.442438439	4.05e-05	-0.365135325	3.9100000000000006e-11	-0.4103575920000001	True	202	2021740.348	0.18935510000000005	12	0.207823506	False	219357742,219279097,219279588,219279673,219287276,219289643,219293326,219295835,219300723,219305404,219308144,219309233,219310483,219311515,219312469,219313354,219317248,219318078,219319885,219320207,219321692,219322430,219324016,219327030,219327582,219328681,219329485,219329819,219330189,219333013,219334613,219334636,219335935,219336108,219336565,219336959,219337333,219338789,219339283,219342284…					2_219578361_T_G;			0.452970297	False	False	False	True	False	False	11.0	12.0	2_219279097;2_219279097;2_219349752;2_219467508;2_219472325;2_219514759;2_219545309;2_219555573;2_219557738;2_219557738	rs7607369;rs7607369;rs492400;rs2710247;rs611203;rs10187066;rs2303565;rs1427445;rs2303566;rs2303566	Amyotrophic lateral sclerosis;Red blood cell count;Body mass index;Lobe attachment (rater-scored or self-reported);Height;Height;Amyotrophic lateral sclerosis;Red blood cell count;Hematocrit;Hemoglobin concentration		GIANT_BMI-M_Mixed_2015;GIANT_Height-F_EUR_2013	1.71e-14		3	6.39e-21
ENSG00000135916	ITM2C	Q9NQX7	Q9NQX7	2_231733703_T_C	rs3111754	0.018543976	0.0008791189999999999	1	8.36e-06	0.3680444570000001	4.94e-05	0.489696824	1.39e-13	0.483819279	0.00025239	0.213139876	True	202	12856674.59	0.199857055	10	0.125542476	False	231,733,703,231,732,000,000,000,000,000,000,000,000,000,000,000,000,000,000,000,000,000,000,000		2_231735595_TC_T;2_231732712_TCGGTGAACAGATGATTGTG_T;			2_231736211_T_G;2_231736156_C_T;2_231736107_G_A;2_231735595_TC_T;2_231734997_A_G;2_231734799_A_G;2_231732712_TCGGTGAACAGATGATTGTG_T;2_231733703_T_C;			0.420792079	False	True	False	True	False	False	10.0	10.0								5	2.17e-11
ENSG00000136026	CKAP4	Q07065	Q07065	12_106652025_C_A	rs35463963	0.073811341	0.005088948	1	1.57e-05	0.333946733	0.004717615	0.645802298	0.000176708	0.226257795	0.000118797	0.249909126	True	202	83807168.9	0.125144871	31	0.08233137	False	106,652,025,106,626,000,000,000,000,000,000,000,000,000,000,000,000,000,000,000,000,000,000,000								0.393564356	False	False	False	False	False	False	27.0	30.0								0
ENSG00000136045	PWP1	Q13610	Q13610	12_108073695_A_G	rs4964607	0.005837064	0.000215909	1	2.32e-06	-0.484711896	0.00634546	-0.493670455	8.33e-10	-0.64924479	5.75e-11	-0.622414779	True	202	19507430.18	0.132508871	19	0.198922192	True	108073695,108074957,108075138,108079446,108079977,108081179,108082066,108083653,108086896,108089998,108094338,108098587,108099623,108103354,108104977,108105386,108108382,108110486,108120460,108120573,108122424,108122726,108124178,108131052,108132626,108135911,108136893,108137525,108139591,108140621,108143445,108146905,108148528,108149611,108150920,108151801,108151811,108159186,108159932,108160764…		12_108099623_CACATATGCACATACGTGT_C;12_108098584_ATAG_A;12_108082066_TC_T;			12_108105386_A_G;12_108104977_G_T;12_108103354_C_T;12_108099623_CACATATGCACATACGTGT_C;12_108098587_G_A;12_108098584_ATAG_A;12_108094338_C_T;12_108089998_C_T;12_108086896_A_C;12_108083653_C_T;12_108082066_T_A;12_108082066_TC_T;12_108081179_C_T;12_108079977_C_T;	12_108089998_C_T;12_108086896_A_C;12_108083653_C_T;12_108082066_T_A;12_108082066_TC_T;12_108081179_C_T;12_108079977_C_T;		0.168316832	False	True	False	True	False	False	15.0	19.0								10	2.2e-16
ENSG00000136068	FLNB	O75369	O75369	3_57991811_G_A	rs6798382	0.019700842	0.000950105	1	5.35e-06	-0.354229031	0.11977499	-0.446800405	0.605847203	-0.202998038	0.304791135	-0.051518235	False	202	627799844.8	0.27112647300000003	151	0.390020419	False	5,799,181,157,980,650,000,000,000,000,000,000,000,000,000,000,000,000,000,000,000,000,000,000,000,000,000,000,000,000,000,000,000,000,000,000,000,000,000,000,000,000,000,000,000,000,000,000,000,000,000,000,000,000		3_58005403_AT_A;3_58005402_GA_G;			3_58009372_A_T;3_58008626_C_T;3_58006600_G_A;3_58006266_G_T;3_58005403_AT_A;3_58005402_GA_G;3_58003134_C_T;3_58002106_C_A;3_58000988_G_T;3_58000664_C_T;3_57998986_C_T;			0.23019802	False	True	False	True	False	False	127.0	151.0	3_58006266;3_58006266	rs6764184;rs6764184	Optic cup area;Vertical cup-disc ratio					0
ENSG00000136100	VPS36	Q86VN1	Q86VN1	13_53101262_A_G	rs61959754	0.027413044	0.0014343479999999998	1	4.62e-06	-0.801966002	0.00371676	-0.7662270259999999	1.68e-06	-0.732694205	4.37e-06	-0.5931876389999999	True	202	6696375.295	0.14794043	17	0.126801057	True	53101262,52735863,52738193,52741601,52747226,52747415,52749127,52755185,52756916,52757566,52759879,52766599,52767910,52776103,52777239,52777776,52779130,52780394,52782196,52783105,52784473,52785846,52786063,52789092,52790567,52791629,52795059,52801661,52802911,52810537,52822610,52857736,52862570,52862667,52862691,52862716,52866925,52867064,52867241,52874464,52879280,52879321,52879323,52885741,528…		13_53018768_TAAAC_T;13_53006522_AC_A;		13_52988350_C_T;13_52987739_A_T;	13_53023948_G_A;13_53023853_G_A;13_53022696_T_A;13_53022562_C_A;13_53022339_T_G;13_53022300_T_C;13_53021168_G_A;13_53021080_G_T;13_53020870_T_C;13_53020635_C_T;13_53020384_G_C;13_53018768_TAAAC_T;13_53018055_C_T;13_53017117_C_T;13_53016893_G_A;13_53016687_T_C;13_53015454_A_C;13_53013395_A_G;13_53013144_G_A;13_53012739_C_T;13_53011644_A_G;13_53010346_A_G;13_53008792_C_T;13_53008773_G_A;13_53008754…			0.051980198	True	True	False	True	False	False	8.0	9.0								2	8.36e-08
ENSG00000136143	SUCLA2	Q9P2R7-2	Q9P2R7-2	13_48515525_C_T	rs1326138	0.000101998	1.9e-06	1	2.63e-11	-0.67111039	1.8000000000000002e-20	-1.393487318	1.29e-27	-0.969660508	3.2299999999999994e-29	-0.952547188	True	202	34331975.19	0.143186319	25	0.1387115	True	48515525,48514779,48515581,48516470,48516494,48518285,48518958,48519113,48521553,48521851,48522756,48524797,48525178,48525423,48525443,48525465,48525776,48525870,48527288,48527310,48527568,48528007,48528178,48529433,48530075,48532338,48532420,48532900,48533212,48535660,48536034,48537188,48537294,48538428,48538779,48540218,48540836,48540853,48540943,48541144,48545225,48546907,48547180,48547467,485…	13_48547467_A_T;	13_48573347_CT_C;13_48573346_AC_A;13_48563687_TA_T;13_48559079_TA_T;13_48558502_GT_G;13_48549315_ATC_A;13_48537188_TAGTC_T;13_48535660_AT_A;13_48535659_TA_T;13_48525464_AG_A;13_48516470_CA_C;			13_48575292_C_T;13_48573610_A_C;13_48573347_CT_C;13_48573346_AC_A;13_48571383_C_T;13_48568289_C_A;13_48567848_C_T;13_48563687_TA_T;13_48563008_G_A;13_48562239_G_C;13_48561837_A_T;13_48561277_A_G;13_48560634_T_C;13_48559079_TA_T;13_48558613_A_G;13_48558502_G_T;13_48558502_GT_G;13_48558415_G_A;13_48556967_A_C;13_48556679_A_C;13_48555888_T_C;13_48555001_T_C;13_48554957_G_C;13_48553730_C_T;13_4855304…			0.205445545	False	True	True	True	False	False	24.0	26.0								15	1.85e-19
ENSG00000136153	LMO7	Q8WWI1-2	Q8WWI1-2	13_76210742_A_C	rs2224797	0.052337354	0.001059857	3	1.88e-07	0.348760413	8.12e-07	0.626375063	1.34e-06	0.340134317	3.9200000000000005e-09	0.318931202	True	202	8828284.374	0.2355604060000001	29	0.17824165399999994	True	76,210,742,762,099,600,000,000,000,000,000,000,000,000,000,000,000,000,000,000,000,000,000,000,000,000,000,000,000,000,000,000,000,000,000		13_76233183_A_ACTCT;13_76228624_AG_A;13_76210741_AA_A;		13_76210742_A_C;13_76210741_AA_A;	13_76237724_A_G;13_76233183_A_ACTCT;13_76228781_G_A;13_76228624_AG_A;13_76227427_T_C;13_76225809_C_T;13_76225179_A_T;13_76220623_G_C;13_76217622_T_C;13_76214458_A_G;13_76213643_C_G;13_76209961_T_G;13_76210742_A_C;13_76210741_AA_A;			0.430693069	True	True	False	True	False	False	26.0	29.0	13_76210742;13_76210742	rs2224797;rs2224797	Mean corpuscular hemoglobin;Red blood cell count					0
ENSG00000136247	ZDHHC4	Q9NPG8	Q9NPG8	7_6852113_A_C		0.077357534	0.005451157	1	3.5700000000000014e-05	-0.530945193	9.3e-05	-0.51707993	0.387742576	-0.21324286	0.337661509	-0.076863605	False	160	211529.2658	0.243910201	1	0.24816134	False	6852113								0.207920792	False	False	False	False	False	False	1.0	1.0								0
ENSG00000136270	TBRG4	Q969Z0	Q969Z0	7_45120704_C_T	rs2304692	0.027304567	0.001425475	1	9.41e-07	-0.419652462	4.59e-05	-0.528896569	7.15e-12	-0.418281716	0.460407954	0.036537842	True	202	30942110.42	0.14072194400000002	22	0.07087341700000001	False	45120704,45008501,45017244,45018263,45019889,45021926,45023100,45023503,45029357,45029887,45030734,45031656,45036860,45038736,45043647,45045830,45051924,45053215,45057328,45058510,45061976,45064040,45068112,45068583,45068827,45073890,45082777,45084821,45086038,45090144,45093834,45095069,45097660,45105210,45116136,45127332,45130907,45131210,45133116,45135387,45135839,45135873,45136392,45136423,451…	7_45148773_C_A;7_45148667_G_A;				7_45148773_C_A;7_45144113_C_T;7_45143892_A_G;			0.180693069	False	False	True	True	False	False	20.0	22.0								0
ENSG00000136371	MTHFS	P49914	P49914	15_80112067_C_T	rs1114170	1.65e-09	6.5800000000000014e-12	1	2.94e-15	-0.952557441	3.5499999999999995e-13	-0.95347995	4.31e-23	-1.09339098	1.24e-19	-0.987721514	True	184	2352538.88	0.183780705	1	0.113719289	False	80112067,80100264,80100717,80100934,80102172,80102275,80102774,80103113,80104175,80105125,80106535,80107090,80107333,80107797,80110590,80112327,80115348,80119159,80119844,80129813,80135259,80136462,80139251,80140735,80143035,80143075,80147183,80147936,80148220,80150080,80151013,80151907,80154571,80157583					15_80157583_T_C;15_80154571_A_G;15_80151907_C_T;15_80151013_A_G;15_80150080_C_T;15_80148220_T_C;15_80147936_G_A;15_80147183_A_G;15_80143075_A_G;15_80143035_T_C;15_80140735_T_C;15_80139251_T_C;15_80136462_T_A;15_80135259_C_G;15_80129813_T_C;	15_80136462_T_A;15_80135259_C_G;15_80129813_T_C;		0.165841584	False	False	False	True	False	False	1.0	1.0					Astle-W_gran-p-myeloid-wbc_EUR_2017;Astle-W_mono-p_EUR_2017	2.609999999999998e-129	1.2299999999999989e-129	29	6.85e-50
ENSG00000136717	BIN1	O00499	O00499	2_127864922_G_C	rs78710909	8.48e-05	1.51e-06	1	5.91e-09	-0.7277127170000001	6.94e-06	-0.875278888	2.05e-15	-0.919577457	6.349999999999999e-26	-1.23360589	True	202	8441140.349	0.15521183300000002	19	0.188118389	False	###############################################################################################################################################################################################################################################################		2_127845956_T_TGAG;		2_127864921_C_G;2_127864922_G_C;	2_127863029_C_T;2_127861906_G_C;2_127861766_T_A;2_127859418_T_C;2_127855392_C_T;2_127850292_A_G;2_127846505_T_C;2_127845956_T_TGAG;			0.183168317	True	True	False	True	False	False	19.0	19.0	2_127887985	rs12989701	Alzheimer's disease (late onset)	3.00E-10				16	1.25e-28
ENSG00000136810	TXN	P10599	P10599	9_113023522_G_A	rs72757061	0.000471637	1.1e-05	1	7.27e-10	-0.595496302	5.06e-09	-0.595593866	3e-22	-0.967513769	3.64e-36	-0.823768356	True	202	60139741.56	0.188142796	7	0.184432069	False	113,023,522,113,015,000,000,000,000,000,000,000,000,000,000,000,000,000,000,000,000,000,000,000,000,000,000,000,000,000,000,000,000,000,000,000,000,000,000,000,000,000,000,000,000,000,000,000		9_113015000_C_CGT;		9_113018755_T_C;	9_113015602_C_T;9_113015000_CA_CGTT;9_113015000_CA_CGTT;9_113015000_C_CGT;			0.165841584	True	True	False	True	False	False	7.0	7.0	9_113023862	rs72757062	Mean corpuscular hemoglobin					14	8.63e-20
ENSG00000136824	SMC2	O95347	O95347	9_106896809_G_A	rs7872034	3.829999999999999e-09	1.93e-11	1	6.3e-16	0.676971164	3.5000000000000003e-10	0.61275548	7.74e-23	0.778885675	1.85e-19	0.439212189	True	202	87000404.85	0.07716638	58	0.086064349	True	106896809,106852385,106853118,106856452,106856633,106856691,106856692,106856793,106856806,106856910,106856952,106856972,106857078,106857180,106857908,106858192,106858788,106859701,106859738,106859811,106860568,106861118,106861191,106861281,106861282,106864570,106865438,106865691,106865692,106866703,106867106,106868443,106871050,106872864,106875277,106877939,106878318,106878839,106881402,106883085…		9_106899951_TA_T;9_106897491_C_CGATGATGCAAGTAGGAGA;9_106896874_T_TATATTATAA;9_106888838_ATTAT_A;9_106878839_TATCA_T;9_106878318_TCTC_T;9_106872864_A_ATGT;9_106871050_AATCCTAGGTTTC_A;9_106859807_AGAAG_A;9_106859701_TA_T;9_106857180_ATTGTGGAGAG_A;9_106856806_TGGCGGGA_T;		9_106857078_A_G;9_106856972_G_C;9_106856952_C_T;9_106856910_C_T;9_106856692_T_C;9_106856691_T_G;9_106856633_C_T;	9_106899951_TA_T;9_106898410_C_T;9_106897491_C_CGATGATGCAAGTAGGAGA;9_106897491_C_G;9_106896874_T_TATATTATAA;9_106893334_A_G;9_106890840_A_G;9_106888838_ATTAT_A;9_106887581_A_G;9_106885243_C_T;9_106883085_T_G;9_106881402_C_T;9_106878839_TATCA_T;9_106878318_TCTC_T;9_106877939_G_A;9_106875277_G_T;9_106872864_A_ATGT;9_106871050_AATCCTAGGTTTC_A;9_106868443_A_G;9_106867106_A_C;9_106866703_C_T;9_1068656…	9_106899951_TA_T;9_106898410_C_T;9_106897491_C_CGATGATGCAAGTAGGAGA;9_106897491_C_G;9_106896874_T_TATATTATAA;9_106893334_A_G;9_106890840_A_G;9_106896809_G_A;	9_106896809_G_A;	0.46039604	True	True	False	True	False	True	52.0	58.0	9_106856793;9_106856793;9_106865692;9_106887581	rs4742903;rs4742903;rs7859034;rs2417487	Breast cancer;High-grade serous ovarian cancer;Pancreatic ductal adenocarcinoma;Pancreatic cancer		Phelan-M_HGSOC_EUR_2017;Phelan-M_Invasive-ovarian-cancer_EUR_2017;Phelan-M_Serous-Invasive-Ovarian-Cancer_EUR_2017	0.8093399	0.0183899	33	1.57e-52
ENSG00000136930	PSMB7	Q99436	Q99436	9_127118386_T_C	rs7873147	9.39e-06	1.35e-07	1	1.56e-10	0.8606080970000001	0.000269995	0.689227587	9.78e-11	0.8913993	1.75e-14	0.7081807040000001	True	202	59192537.23	0.086696442	12	0.069233315	True	127,118,386,127,109,000,000,000,000,000,000,000,000,000,000,000,000,000,000,000,000,000,000,000,000,000,000,000,000,000,000,000,000,000,000,000,000,000,000,000,000,000,000,000,000,000,000,000,000,000,000		9_127115990_TAGTAAGAGAAAAACAAAAGCACAGAGTTAGGATTCTCCTCAAGGTGCCAGAGGGCAGAAGACAGTGAAAATAAATATTCAGGCAACGCAGTGAGCAGGCTGGACTGGAATCTTGGCTCTCCCGATCCCAGCTCTGTGATCTTGGGGGATTCAACTTCCTCAGTTCTCAAGTGCTGCAAAATGGGGGTGCCTGGGAGGCAAAGAGTGTCATTAGTGAACACGGCACCTGGCCCTTGGTGGACACGTGACTCTCCCCCCACCCCACCATCCCCACAAGTGCTGGGAAGCACTTGGTCCCTTGACATCAATCTTCAACCTCCCTACAATACTGTTCAGGGACAGCAGGAAGCAAATCCCATCATTACACAAGAGAAGGGCATGATTGCT…	9_127115990_TAGTAAGAGAAAAACAAAAGCACAGAGTTAGGATTCTCCTCAAGGTGCCAGAGGGCAGAAGACAGTGAAAATAAATATTCAGGCAACGCAGTGAGCAGGCTGGACTGGAATCTTGGCTCTCCCGATCCCAGCTCTGTGATCTTGGGGGATTCAACTTCCTCAGTTCTCAAGTGCTGCAAAATGGGGGTGCCTGGGAGGCAAAGAGTGTCATTAGTGAACACGGCACCTGGCCCTTGGTGGACACGTGACTCTCCCCCCACCCCACCATCCCCACAAGTGCTGGGAAGCACTTGGTCCCTTGACATCAATCTTCAACCTCCCTACAATACTGTTCAGGGACAGCAGGAAGCAAATCCCATCATTACACAAGAGAAGGGCATGATTGCT…		9_127176979_C_G;9_127174091_G_A;9_127152782_C_T;9_127152244_C_A;9_127138547_G_T;9_127126278_G_C;9_127122758_C_G;9_127118386_T_C;9_127115990_TAGTAAGAGAAAAACAAAAGCACAGAGTTAGGATTCTCCTCAAGGTGCCAGAGGGCAGAAGACAGTGAAAATAAATATTCAGGCAACGCAGTGAGCAGGCTGGACTGGAATCTTGGCTCTCCCGATCCCAGCTCTGTGATCTTGGGGGATTCAACTTCCTCAGTTCTCAAGTGCTGCAAAATGGGGGTGCCTGGGAGGCAAAGAGTGTCATTAGTGAACACGGCACCTGGCCCTTGGTGGACACGTGACTCTCCCCCCA…			0.04950495	False	True	False	True	True	False	11.0	12.0								1	1.97e-05
ENSG00000136943	CTSV	O60911	O60911	9_100047676_T_C	rs2795365	0.069148117	0.0047248870000000005	1	2.69e-05	-0.357700367	0.001460323	-0.31714679	3.360000000000001e-09	-0.484881966	1.32e-09	-0.492996642	True	202	7412512.834	0.226664643	13	0.281624741	False	100047676,99912861,99912862,99914050,99914953,99916514,99916521,99918427,99920155,99921667,99927838,99929723,99935775,99935999,99941338,99951133,99952079,99956049,99979341,99981843,99981972,99982366,99982545,99982770,99982830,99983055,99983093,99983101,99983127,99983219,99983263,99983312,99983332,99983338,99983513,99983761,99983812,99983847,99983931,99984000,99984402,99986704,99987850,99987990,99…								0.467821782	False	False	False	False	False	False	13.0	13.0								3	1.25e-07
ENSG00000137124	ALDH1B1	P30837	P30837	9_38398150_G_C	rs10758495	1.45e-06	1.59e-08	1	6.22e-14	-0.977345841	5.58e-11	-0.894831037	0.409062823	-0.065370118	0.33155803100000003	-0.080704032	False	202	57447675.2	0.153684961	24	0.311969024	False	383,981,503,839,592,000,000,000	9_38396002_C_T;			9_38398150_G_C;			9_38395928_C_T;	0.14603960400000002	True	False	True	False	False	True	24.0	24.0								0
ENSG00000137275	RIPK1	Q13546	Q13546	6_3048688_A_G		0.027775964	0.001465653	1	1.2099999999999998e-07	0.455962089	0.00088925	0.625695315	9.57e-06	0.443042414	0.000316143	0.265465203	True	202	12113880.88	0.15780138	25	0.1775769	True	30,486,883,053,288								0.30198019800000003	False	False	False	False	False	False	23.0	25.0								7	2.52e-07
ENSG00000137309	HMGA1	P17096	P17096	6_34423179_C_T		0.084240966	0.006100493	1	2.33e-05	-0.361643817	0.5015927920000001	-0.184995019	0.158513836	-0.183868153	0.173769948	-0.06585321599999999	False	202	190513602.9	0.119114712	7	0.121553136	False	34,423,179,344,257,800,000,000,000,000,000								0.28960396	False	False	False	False	False	False	5.0	7.0								0
ENSG00000137312	FLOT1	O75955	O75955	6_30737591_G_C		0.020855138	0.001013096	1	1.46e-06	-0.439699828	3.21e-05	-0.369403563	6.570000000000001e-12	-0.748188634	6.29e-05	-0.31025187600000004	True	202	28781249.15	0.12958353	27	0.078229303	True	30737591								0.195544554	False	False	False	False	False	False	22.0	26.0	6_30737591	rs115507122	Depression		Hou-L_BD_EUR_2016;Ji-S_PSC_EUR_2017;TAGC_Asthma_EUR_2018	0.017320392	0.00099835	4	1.97e-07
ENSG00000137364	TPMT	P51580	P51580	6_18107132_G_T		4.24e-12	7.45e-15	1	2.79e-22	-1.5913866280000002	2.4e-16	-1.439037575	0.30428465	0.125205708	0.527907502	0.071616148	False	202	9821510.796	0.264352665	10	0.186700843	False	18107132,18103028,18103119,18104645,18108531,18109498,18109815,18114246,18114442,18114687,18116426,18116478,18116485,18117820,18117955,18118392,18118540,18118712,18118725,18118898,18119458,18119510,18119688,18120013,18120156,18120172,18120400,18120484,18120554,18120564,18121024,18121029,18121314,18122942,18124230,18124962,18125063,18125603,18126938,18128201,18128481,18130918,18132495,18134687,181…	6_18139228_C_T;6_18130918_T_C;	6_18154526_CACAA_C;6_18154525_CCA_C;6_18144098_AG_A;6_18142802_C_CCAAA;6_18140894_G_GAC;			6_18154526_CACAA_C;6_18154525_CCA_C;6_18152540_G_C;6_18152293_T_C;6_18152190_T_C;6_18151571_T_C;6_18149105_A_T;6_18148665_G_C;6_18147958_C_A;6_18145907_C_T;6_18145891_G_A;6_18145750_T_C;6_18145733_T_G;6_18144905_C_T;6_18144521_A_T;6_18144098_AG_A;6_18143512_C_T;6_18142802_C_CCAAA;6_18142288_C_T;6_18141639_T_C;6_18140894_G_GAC;6_18140563_C_T;6_18135520_T_C;6_18135341_G_A;6_18132495_G_A;			0.059405941	False	True	True	True	False	False	6.0	6.0	6_18103028;6_18114246	rs73726531;rs143093668	Thiopurine S-methyltransferase activity;Intrinsic epigenetic age acceleration					5	1.38e-08
ENSG00000137513	NARS2	Q96I59	Q96I59	11_78214019_A_G	rs6592782	0.000350524	7.96e-06	1	9.8e-09	-0.7101732909999999	2.54e-05	-0.640817022	4.97e-19	-0.2869253	0.22745141	-0.107644242	True	202	9650502.437	0.163599585	18	0.170067603	False	78214019,78139279,78140373,78140726,78141021,78142982,78144753,78145886,78147055,78149340,78149365,78149961,78150592,78153667,78154148,78154401,78155086,78155090,78156692,78156960,78157309,78157401,78157983,78158091,78158215,78158542,78158943,78158948,78159078,78159365,78159426,78159536,78160120,78161361,78161430,78161452,78161948,78163164,78163636,78165343,78166930,78166967,78168603,78168705,781…		11_78251532_CT_C;11_78251531_AC_A;11_78235432_CCAA_C;11_78224907_TA_T;11_78221697_GCATG_G;11_78221695_GTGCA_G;11_78218921_C_CCATT;11_78218920_C_CCATT;11_78207781_T_TGATA;11_78204073_CACAGAT_C;11_78202435_C_CA;11_78191740_TG_T;11_78178014_GT_G;11_78169534_AGGTGG_A;11_78163163_TA_T;11_78159078_CTA_C;11_78158215_T_TG;11_78158091_CA_C;11_78153667_TTC_T;11_78153666_TTTC_T;		11_78147055_A_G;	11_78271614_A_C;11_78270304_A_G;11_78270165_C_A;11_78270020_C_G;11_78270000_C_T;11_78269985_T_C;11_78269961_G_A;11_78268878_C_A;11_78268525_A_G;11_78266924_T_C;11_78266602_A_G;11_78266227_T_C;11_78266047_T_A;11_78265667_T_G;11_78265655_G_C;11_78265403_G_C;11_78265210_A_G;11_78264583_A_C;11_78264502_T_C;11_78264421_A_G;11_78264231_A_G;11_78264202_G_C;11_78263847_C_T;11_78263331_A_G;11_78263127_T_C…	11_78271614_A_C;11_78270304_A_G;11_78270165_C_A;11_78270020_C_G;11_78270000_C_T;11_78269985_T_C;11_78269961_G_A;11_78268878_C_A;11_78268525_A_G;11_78266924_T_C;11_78266602_A_G;11_78266227_T_C;11_78266047_T_A;11_78265667_T_G;11_78265655_G_C;11_78265403_G_C;11_78265210_A_G;11_78264583_A_C;11_78264502_T_C;11_78264421_A_G;11_78264231_A_G;11_78264202_G_C;11_78263847_C_T;11_78263331_A_G;11_78263127_T_C…		0.207920792	True	True	False	True	False	False	17.0	18.0								29	2.41e-32
ENSG00000137806	NDUFAF1	Q9Y375	Q9Y375	15_41655523_G_C	rs28716108	0.018145725	0.000853593	1	3.23e-06	-0.428337051	7.87e-09	-0.907922801	2.4199999999999998e-23	-0.907393063	2.64e-26	-0.966502462	True	202	5611954.14	0.16813297100000002	13	0.284226262	True	41655523,41579322,41581624,41582598,41585926,41586798,41586909,41588762,41588872,41603276,41603944,41605632,41608470,41611066,41612180,41613388,41614122,41614704,41620014,41621842,41621921,41622793,41623308,41629502,41634587,41634588,41648967,41649922,41651721,41654617,41654801,41657144,41663896,41674060,41676817,41677692,41677752,41682896,41683159,41685740,41685917,41694743,41698305,41701021,417…					15_41685917_G_T;15_41685740_A_G;15_41683159_A_G;15_41682896_A_G;	15_41685917_G_T;15_41685740_A_G;15_41683159_A_G;15_41682896_A_G;		0.25990099	False	False	False	True	False	False	12.0	13.0	15_41735710	rs2777491	Ulcerative colitis		EGGC_Puberty-Growth-10-F-12-M_EUR_2013;EGGC_Puberty-Growth-12-M_EUR_2013;Ferreira-M_Allergic-Disease_EUR_2017;ReproGen_Age-at-Menopause_EUR_2015	0.16175111	6.100000000000001e-11	25	1.9899999999999996e-77
ENSG00000137944	CCBL2	Q6YP21	Q6YP21	1_89388944_A_C	rs7532151	4.41e-15	4.65e-18	1	4.1299999999999987e-23	-0.834209035	5.47e-15	-0.742066819	3.16e-16	-0.734133785	3.44e-25	-0.865017266	True	202	35058363.17	0.139804034	23	0.169492598	False	89388944,89364006,89364972,89366676,89368765,89373371,89376929,89382664,89383098,89396447,89402379,89402960,89403478,89406541,89407214,89409911,89412372,89413353,89413873,89413920,89415576,89416516,89417315,89418231,89418403,89419575,89419588,89420315,89422084,89422173,89423920,89425806,89425939,89425966,89426260,89426277,89426902,89427453,89427571,89428107,89429039,89429149,89430420,89431277,894…		1_89444497_AT_A;1_89419588_CT_C;1_89413914_CAATTTAGTAT_C;1_89402379_GC_G;			1_89447978_T_A;1_89444965_C_T;1_89444497_AT_A;1_89443967_A_T;1_89442732_T_C;1_89441642_A_G;1_89440977_G_A;1_89440917_C_A;1_89440804_G_A;1_89438739_T_A;1_89438598_G_C;1_89438113_A_G;1_89436181_T_C;1_89435778_T_C;1_89435523_T_A;1_89435414_A_G;1_89431277_C_T;1_89430420_A_G;1_89429149_T_C;1_89429039_T_A;1_89428107_A_G;1_89427571_G_C;1_89427453_G_A;1_89426277_C_T;1_89426260_T_C;1_89425966_T_C;1_894259…		1_89426902_G_A;	0.45049505	False	True	False	True	False	True	22.0	23.0	1_89382664;1_89412372	rs9787133;rs12144640	Blood protein levels;Blood protein levels	3E-12;3E-12	Astle-W_rbc_EUR_2017;GIANT_Waist-Non-smokers-M_Mixed_2017;GIANT_Waist-Non-smokers_EUR_2017;van-der-Harst-P_CAD_Mixed_2018	0.000177664	1.5399999999999998e-05	41	2.1499999999999996e-89
ENSG00000138030	KHK	P50053-2	P50053-2	2_27315252_G_A	rs2304681	0.000190368	3.83e-06	1	1.79e-08	-0.589911148	0.0008236560000000001	-0.612393369	0.000878031	-0.133532653	2.63e-06	0.264601572	True	140	592991.3169	0.245095555	4	0.371262129	False	27315252,27187814,27194013,27196299,27198148,27199608,27199754,27201857,27202120,27204650,27206474,27208867,27210205,27210302,27211212,27212526,27212596,27215097,27215269,27217102,27217228,27224209,27225144,27226954,27227707,27229079,27229372,27229891,27229892,27231145,27233467,27233789,27233859,27237614,27239949,27241795,27243364,27244712,27245475,27247832,27249245,27250603,27250750,27254796,272…	2_27315252_G_A;			2_27323385_C_T;2_27309659_A_C;	2_27321224_T_C;2_27321206_T_G;2_27315714_C_T;2_27315064_G_A;2_27315021_G_A;2_27314882_G_A;2_27312882_A_G;2_27310393_G_A;			0.378712871	True	False	True	True	False	False	4.0	4.0	2_27229079;2_27295885;2_27315252	rs12997235;rs4665943;rs2304681	Highest math class taken (MTAG);White blood cell count;Self-reported risk-taking behaviour		Astle-W_lymph-p_EUR_2017;Astle-W_neut-p_EUR_2017;MAGIC_FG-METABO_EUR_2012	1.338321	5.539999999999995e-118	29	5.68e-54
ENSG00000138074	SLC5A6	Q9Y289	Q9Y289	2_27339394_A_G	rs72854125	0.039184907000000005	0.002193839	1	2.36e-05	-0.5511950320000001	0.000534574	-0.470546079	1.354097456	-0.184039324	0.47691837	-0.058578074	False	202	2833507.4710000013	0.243228755	6	0.282864579	False	27,339,394,273,377,700,000,000,000,000,000,000,000,000,000,000,000,000,000								0.081683168	False	False	False	False	False	False	1.0	3.0								0
ENSG00000138095	LRPPRC	P42704	P42704	2_44145374_G_T	rs7568481	2.15e-08	1.49e-10	1	7.959999999999999e-17	0.73308192	1.37e-11	0.636022387	3.76e-31	0.730757995	4.9799999999999996e-33	0.871507395	True	202	342875676.6	0.123243478	81	0.089181211	True	44,145,374,441,230,700,000,000,000,000,000,000,000,000,000,000,000,000,000,000,000,000,000,000,000,000,000,000,000,000,000,000,000,000,000,000,000,000,000,000,000,000,000,000,000,000,000,000,000,000,000,000,000,000,000,000,000,000,000		2_44135775_CT_C;			2_44180796_G_A;2_44178034_T_C;2_44173422_T_G;2_44172444_A_C;2_44165733_C_G;2_44164481_T_A;2_44155986_T_C;2_44153682_T_C;2_44151808_C_T;2_44151572_G_C;2_44149442_T_C;2_44143756_A_G;2_44143216_T_A;2_44141849_T_C;2_44135997_C_A;2_44135775_CT_C;2_44133774_C_G;2_44128912_C_T;2_44125210_T_A;2_44125086_C_T;2_44123073_A_T;2_44145374_G_T;			0.400990099	False	True	False	True	False	False	77.0	81.0					GIANT_WHR-adjusted-Smoking-F_Mixed_2017	2.9e-07	7.679999999999995e-108	39	7.199999999999998e-41
ENSG00000138182	KIF20B	Q96Q89	Q96Q89	10_91575644_C_T		0.0006604110000000001	8.08e-06	2	1.05e-10	-0.743191587	3.31e-10	-0.866709443	0.5164429620000001	-0.07556548099999999	0.098892448	-0.06366483099999999	False	202	30054543.1	0.134314841	54	0.105917982	False	91575644,91390200,91390240,91390407,91390731,91392543,91392767,91394079,91394659,91397564,91406251,91406927,91409381,91413368,91419285,91429476,91433162,91434677,91436057,91438098,91441689,91441892,91443283,91454731,91455205,91458587,91460084,91463751,91468925,91471015,91476465,91481448,91482629,91482830,91487649,91488979,91494967,91495322,91501477,91505383,91513152,91517355,91521030,91522689,915…	10_91488979_A_T;10_91487649_A_T;10_91468925_C_G;	10_91529441_CAT_C;10_91482830_CTG_C;	10_91468925_C_G;		10_91529441_CAT_C;10_91526599_T_G;10_91522689_G_A;10_91521030_G_A;10_91517355_A_G;10_91513152_A_G;10_91505383_C_T;10_91501477_C_G;10_91495322_G_A;10_91494967_T_C;10_91482830_CTG_C;10_91482629_A_T;10_91481448_A_G;10_91476465_T_C;10_91471015_A_G;10_91463751_A_C;			0.202970297	False	True	True	True	True	False	50.0	54.0					Astle-W_hct_EUR_2017;Phelan-M_HGSOC_EUR_2017;Phelan-M_Invasive-ovarian-cancer_EUR_2017;Phelan-M_Serous-Invasive-Ovarian-Cancer_EUR_2017	0.37268846	3.929999999999998e-70	1	7.46e-06
ENSG00000138363	ATIC	P31939	P31939	2_216176807_T_G	rs4535042	2.3799999999999997e-16	1.95e-19	1	1.7e-21	-0.743349688	2.0100000000000003e-15	-0.666316823	1.36e-13	-0.625167398	1.7499999999999994e-21	-0.89229386	True	202	203092450.8	0.152342063	38	0.094628723	False	216176807,216162062,216165244,216167244,216179264,216180559,216181279,216187056,216190020,216193600,216194586,216194634,216205472,216207924,216208149,216208235,216208950,216209472,216212089,216212339,216214124,216216804,216218202,216218830,216219885,216220870,216221540,216222938,216223017,216223272,216224790,216228483,216229692,216232108	2_216190020_C_G;	2_216213971_GGGTAAGTATGGAATTGGGTGCATTTGCTTAGAGTTGAGCATTATGTAGAAACTGTTTCAGAAATCCTGCTTTTGATTTTTAAAAGGTGTGGCAAAGTGATACAGATCAGTAATATTCAGAGAACCATTTGACTTCTCCATTGGGTGGATGGAGAACCCAAATCCTGTTGTTATTTTGCCTTTTTGACTGAGTGTATCTTTGTTAGCATATGCTTTTTAGAGGGGGATTTTGAGTTTTGCAGGTTTTTACATAAAATCGCGTTTTGAAAATCAATATACTTCCCCCA_G;2_216211662_GAGGTGAAAGACTTGGCATTGGGTTCTCGGCTGTGTTAATATTCAGTTCAACCCTTTATGTGTAACAGATTTTAACTTCATCACC…	2_216213971_GGGTAAGTATGGAATTGGGTGCATTTGCTTAGAGTTGAGCATTATGTAGAAACTGTTTCAGAAATCCTGCTTTTGATTTTTAAAAGGTGTGGCAAAGTGATACAGATCAGTAATATTCAGAGAACCATTTGACTTCTCCATTGGGTGGATGGAGAACCCAAATCCTGTTGTTATTTTGCCTTTTTGACTGAGTGTATCTTTGTTAGCATATGCTTTTTAGAGGGGGATTTTGAGTTTTGCAGGTTTTTACATAAAATCGCGTTTTGAAAATCAATATACTTCCCCCA_G;2_216211662_GAGGTGAAAGACTTGGCATTGGGTTCTCGGCTGTGTTAATATTCAGTTCAACCCTTTATGTGTAACAGATTTTAACTTCATCACC…	2_216213971_GGGTAAGTATGGAATTGGGTGCATTTGCTTAGAGTTGAGCATTATGTAGAAACTGTTTCAGAAATCCTGCTTTTGATTTTTAAAAGGTGTGGCAAAGTGATACAGATCAGTAATATTCAGAGAACCATTTGACTTCTCCATTGGGTGGATGGAGAACCCAAATCCTGTTGTTATTTTGCCTTTTTGACTGAGTGTATCTTTGTTAGCATATGCTTTTTAGAGGGGGATTTTGAGTTTTGCAGGTTTTTACATAAAATCGCGTTTTGAAAATCAATATACTTCCCCCA_G;2_216190020_C_G;2_216176807_T_G;	2_216214124_G_A;2_216213971_GGGTAAGTATGGAATTGGGTGCATTTGCTTAGAGTTGAGCATTATGTAGAAACTGTTTCAGAAATCCTGCTTTTGATTTTTAAAAGGTGTGGCAAAGTGATACAGATCAGTAATATTCAGAGAACCATTTGACTTCTCCATTGGGTGGATGGAGAACCCAAATCCTGTTGTTATTTTGCCTTTTTGACTGAGTGTATCTTTGTTAGCATATGCTTTTTAGAGGGGGATTTTGAGTTTTGCAGGTTTTTACATAAAATCGCGTTTTGAAAATCAATATACTTCCCCCA_G;2_216212339_T_C;2_216211662_GAGGTGAAAGACTTGGCATTGGGTTCTCGGCTGTGTTAATATTCAGTTCAACC…	2_216190020_C_G;2_216187056_T_C;2_216181279_C_T;2_216180559_T_A;2_216179264_C_G;2_216176807_T_G;		0.282178218	True	True	True	True	True	False	36.0	38.0					GLGC_LDL_EUR_2013	1.19e-23		7	5.16e-15
ENSG00000138604	GLCE	H0YNP1	H0YNP1	15_69593088_A_T	rs183476342	0.019685888	0.000945304	1	2.18e-05	0.7072838909999999			0.00575938	0.238681712	0.077542577	0.137358649	True	107	1701256.188	0.292925432	1	0.528087117	False	69593088								0.235148515	False	False	False	False	False	False										0
ENSG00000138621	PPCDC	Q96CD2	Q96CD2	15_75326754_C_G	rs28394281	0.009677149	0.000397598	1	1.15e-07	0.6914551959999999	0.000228555	0.630262497	0.000225634	0.7688260259999999	1.66e-07	0.6851671009999999	True	202	2345555.336	0.197656742	8	0.169771774	False	75326754,75278340,75279240,75280426,75280826,75282092,75282147,75282541,75283822,75284161,75285626,75286140,75287375,75288610,75290496,75290712,75290822,75291864,75292699,75292721,75292916,75293737,75293839,75294514,75295030,75295464,75295541,75295905,75297283,75297671,75298760,75299075,75299768,75300284,75300623,75302570,75304692,75304754,75305040,75306041,75306644,75306795,75306863,75307521,753…		15_75325074_C_CAC;	15_75315975_G_A;		15_75339575_G_A;15_75336173_T_A;15_75330095_G_T;15_75328256_C_T;15_75325858_T_G;15_75325074_C_CAC;15_75325074_C_A;15_75321910_C_T;15_75320306_A_G;15_75320166_C_T;15_75318652_A_G;15_75315975_G_A;15_75326754_C_G;			0.081683168	False	True	False	True	True	False	7.0	7.0								32	5.83e-30
ENSG00000138744	NAAA	Q02083-2	Q02083-2	4_76859705_C_G	rs13111710	1.19e-05	1.75e-07	1	1.3000000000000002e-10	0.757641954	5.43e-08	0.8068813459999999	3.66e-31	1.031004472	1.0199999999999996e-39	1.069678132	True	179	419452.9516	0.345484522	3	0.324823677	False	76859705,76852585,76853790,76856440,76859615,76860040,76861859,76862255,76870229,76875316,76878716,76878956,76878982,76883281,76886397,76886398,76889388,76891157,76895865,76897791,76898174,76898250,76902033,76903036,76904262,76905472,76905649,76906974,76907213,76916146,76916256,76919536,76920809				4_76856440_T_A;	4_76861859_C_T;4_76860040_G_A;4_76859615_A_T;4_76856440_T_A;4_76853790_C_G;4_76852585_A_C;4_76859705_C_G;			0.366336634	True	False	False	True	False	False	3.0	3.0	4_76861859;4_76889388	rs2292533;rs2273	Blood protein levels;Longevity	1E-32;1E-6				43	9.05e-78
ENSG00000138759	FRAS1	Q86XX4-2	Q86XX4-2	4_78983343_T_A	rs4507385	5.28e-05	9.14e-07	1	7.69e-11	-0.607097306	2.85e-06	-0.633980596	1.76e-14	-0.484475424	2.74e-22	-0.534538904	True	202	14415384.22	0.188012983	57	0.106413334	False	789,833,437,897,841,000,000,000,000,000,000,000,000,000,000,000,000,000,000,000,000,000,000,000	4_78987157_A_G;				4_78990900_C_A;4_78990545_C_T;4_78984082_T_C;4_78981884_C_A;4_78981883_AC_CA;4_78981883_AC_CA;4_78981883_A_C;4_78980923_G_A;4_78983343_T_A;			0.398514851	False	False	True	True	False	False	57.0	57.0								2	2.67e-06
ENSG00000138780	GSTCD	Q8NEC7	Q8NEC7	4_106556961_A_T	rs67822595	0.014711639	0.000650942	1	2.08e-06	0.373262956	0.018375793	0.460862943	3.4e-05	0.322690598	1.04e-08	0.402073985	True	202	7058468.996	0.166489279	20	0.153385216	False	106556961,106531758,106534157,106549747,106550839,106550936,106551549,106552414,106552733,106553364,106555882,106558893,106559378,106559599,106559889,106560347,106561058,106562159,106562607,106562828,106562862,106563166,106563342,106563352,106563407,106563600,106564194,106564250,106580340,106584178								0.25	False	False	False	False	False	False	16.0	20.0								7	2.67e-08
ENSG00000138794	CASP6	P55212	P55212	4_110631621_A_G	rs3087494	0.004570723	0.00015873799999999998	1	4.92e-07	-0.330057263	0.000100506	-0.29843722100000003	6.909999999999999e-07	-0.347302425	1.1100000000000002e-08	-0.382020717	True	202	6888830.703	0.16576519	12	0.098353654	False	110,631,621,110,623,000,000,000,000,000,000,000,000,000,000								0.423267327	False	False	False	False	False	False	12.0	12.0								2	7.27e-09
ENSG00000139197	PEX5	B4E0T2	B4E0T2	12_7352735_G_A		0.08823737400000001	0.003238021	2	7.55e-06	-0.34449214	0.001247715	-0.484976126	5.720000000000002e-05	-0.315610164	8.990000000000001e-12	-0.366424458	True	202	7297641.536	0.135957939	25	0.233600451	False	7352735					12_7352735_G_A;			0.49009901	False	False	False	True	False	False	23.0	25.0								0
ENSG00000139428	MMAB	Q96EY8	Q96EY8	12_109886603_G_A	rs6663	5.78e-09	3.25e-11	1	1.07e-14	-0.863339711	6.14e-10	-0.817235583	2.78e-17	-0.965478925	0.8020745979999999	0.021992857	True	202	5852069.461	0.195212455	9	0.160435476	False	109,886,603,109,890,000,000,000,000								0.242574257	False	False	False	False	False	False	9.0	9.0					Astle-W_rdw_EUR_2017;GLGC_HDL_EUR_2013;GLGC_TC_EUR_2013;Spracklen-CN_HDL_EAS_2017	0.07368910000000001	0.0	5	4.46e-10
ENSG00000139613	SMARCC2	Q8TAQ2	Q8TAQ2	12_56616367_C_G	rs1274495	0.06604967099999999	0.00223052	2	1.24e-05	0.5429623889999999	0.006137274	0.568163199	0.414101629	0.26801050600000004	0.136409306	0.15451981	False	130	852725.3456	0.16878063399999998	1	0.184121418	True	56616367								0.076732673	False	False	False	False	False	False	1.0	1.0								0
ENSG00000139684	ESD	P10768	P10768	13_47370637_A_G	rs1216967	0.00805541	0.000319652	1	5.079999999999999e-07	-0.322478262	0.0039505370000000005	-0.25352688	5.01e-09	-0.434366824	4.23e-12	-0.3770831220000001	True	202	41455499.55	0.163671443	13	0.199368132	False	###############################################################################################################################################################################################################################################################		13_47357687_A_ATCTT;13_47350064_T_TGA;		13_47350124_C_A;13_47350064_TGAGA_TGAGAGA;13_47350064_T_TGA;	13_47370542_A_G;13_47370171_A_T;13_47370170_A_T;13_47368068_T_A;13_47366943_T_C;13_47362530_C_T;13_47357687_A_ATCTT;13_47357687_A_T;13_47350124_C_A;13_47350064_TGAGA_TGAGAGA;13_47350064_T_TGA;13_47370637_A_G;			0.48019802	True	True	False	True	False	False	12.0	12.0								5	1.34e-13
ENSG00000139719	VPS33A	Q96AX1	Q96AX1	12_122490109_A_T	rs10840647	0.06555485700000001	0.004404599	1	0.00028109	-0.277099884	0.072426682	-0.21448986	0.520833574	-0.141753511	0.120569974	0.096994291	False	202	10678553.81	0.099000642	25	0.11659171	True	122,490,109,122,484,000,000,000,000,000,000,000,000,000,000,000,000,000,000,000,000,000,000,000,000,000,000,000,000,000,000,000,000,000,000,000,000,000,000,000,000,000,000,000,000,000,000,000,000,000,000,000,000,000								0.477722772	False	False	False	False	False	False	19.0	24.0	12_122488014;12_122494809	rs1976859;rs11835818	Red blood cell count;Height					0
ENSG00000139842	CUL4A	Q13619	Q13619	13_113875080_C_T	rs56129102	0.016649591000000002	0.000765924	1	1.83e-07	-0.5316727379999999	0.000185204	-0.449168277	3.4299999999999995e-10	-0.521777156	2.1e-10	-0.630429489	True	202	51819059.04	0.098901973	40	0.140097905	True	113,875,080,113,853,000,000,000,000					13_113875080_C_T;			0.205445545	False	False	False	True	False	False	38.0	40.0	13_113853035;13_113853035;13_113875080;13_113875080	rs61966459;rs61966459;rs56129102;rs56129102	Mean corpuscular hemoglobin;Mean corpuscular volume;Mean corpuscular hemoglobin;Red cell distribution width					1	6.12e-06
ENSG00000140043	PTGR2	Q8N8N7	Q8N8N7	14_74387375_A_T	rs2302121	1.6e-09	6.190000000000001e-12	1	1.05e-18	0.714911283	3.28e-13	0.7157490559999999	5.14e-33	0.987245533	1.6799999999999995e-26	0.8066017409999999	True	202	6983046.675	0.289054182	11	0.17099929100000005	False	74387375,74304529,74307246,74307394,74307866,74309707,74313107,74314588,74314836,74315412,74315513,74315644,74316330,74316848,74318645,74318754,74319203,74319242,74319625,74319721,74319989,74320051,74320094,74320648,74320841,74322053,74322205,74322716,74323380,74323382,74323473,74324440,74324671,74325016,74326724,74326966,74327100,74328156,74328643,74329567,74330463,74332456,74332809,74333428,743…		14_74350063_CT_C;14_74347121_CA_C;14_74336715_C_CAGAG;14_74335490_TA_T;14_74325016_GA_G;14_74320051_GT_G;	14_74318645_G_C;	14_74352656_C_G;14_74352314_G_T;14_74351109_G_A;14_74340797_A_T;14_74318754_G_T;14_74318645_G_C;	14_74350063_CT_C;14_74349313_C_T;14_74348594_A_C;14_74348590_A_G;14_74348563_T_G;14_74347554_A_C;14_74347121_CA_C;14_74344276_C_A;14_74342437_C_T;14_74341702_T_C;14_74340555_A_G;14_74340349_C_T;14_74338884_G_A;14_74338782_C_G;14_74338221_A_T;14_74337080_G_T;14_74337009_A_G;14_74336715_C_CAGAG;14_74336130_C_T;14_74335490_TA_T;14_74335215_A_G;14_74334027_T_C;14_74333894_A_G;14_74333428_A_T;14_74332…		14_74340797_A_T;	0.477722772	True	True	False	True	True	True	11.0	11.0					Astle-W_rdw_EUR_2017	0.000408466	9.749999999999989e-117	31	1.32e-45
ENSG00000140463	BBS4	Q96RK4	Q96RK4	15_73096573_A_G	rs8038247	0.006263863000000001	0.000237562	1	3.8e-07	-0.410128393	4.89e-07	-0.702829688	1.208080781	-0.159578166	0.418567244	0.037932759	False	202	1833579.664	0.223602694	10	0.247223054	True	7,309,657,373,097,220,000,000,000,000,000,000,000,000,000,000,000,000,000,000,000,000								0.376237624	False	False	False	False	False	False	10.0	10.0					GIANT_BMI-F_Mixed_2015;GIANT_BMI-M-GT-50_EUR_2015;GIANT_BMI-adjusted-PA-F_Mixed_2017;GIANT_WC-F_Mixed_2015	1.270438		0
ENSG00000140525	FANCI	Q9NVI1	Q9NVI1	15_89869733_A_G	rs2351000	0.005456273	0.000196076	1	7.21e-08	-0.8498497159999999	1.11e-06	-0.928086029	0.038629846	-0.226652029	0.062032414	-0.184288003	False	202	36876414.58	0.114813258	53	0.11829144	True	89869733								0.091584158	False	False	False	False	False	False	46.0	49.0								0
ENSG00000140575	IQGAP1	P46940	P46940	15_90938651_A_C	rs28372225	0.01155888	0.000484382	1	3.73e-07	-0.571779901	0.000594429	-0.732363003	0.013847879	-0.32895105	0.0008227460000000001	-0.223000914	True	202	251268273.4	0.134083341	92	0.101945482	True	909,386,519,089,103,000,000,000					15_90938651_A_C;			0.17574257399999998	False	False	False	True	False	False	80.0	92.0								36	1.47e-39
ENSG00000140650	PMM2	O15305	O15305	16_8900815_C_T	rs17651644	0.06318271	0.004193444	1	1.64e-05	-0.265199721	7.82e-05	-0.301319292	5.79e-16	-0.230833347	0.01940728	-0.138111599	True	202	11809805.24	0.177476877	10	0.104525159	False	890,081,588,921,548,000,000,000,000,000,000,000,000,000,000,000,000,000,000,000,000,000,000,000,000,000,000,000,000,000,000,000,000,000,000,000,000,000,000,000,000,000		16_8912060_AAAG_A;16_8910435_CT_C;			16_8939439_T_C;16_8938307_G_A;16_8937087_A_G;16_8924646_G_C;16_8924280_A_G;16_8923495_C_G;16_8920685_C_T;16_8919750_C_T;16_8915279_G_C;16_8912060_AAAG_A;16_8910435_CT_C;16_8908770_G_C;16_8908245_C_G;16_8907464_G_A;16_8906447_G_A;16_8902777_C_G;16_8892154_A_G;16_8900815_C_T;	16_8939439_T_C;16_8938307_G_A;16_8937087_A_G;16_8924646_G_C;16_8924280_A_G;16_8923495_C_G;16_8920685_C_T;16_8919750_C_T;16_8915279_G_C;16_8912060_AAAG_A;16_8910435_CT_C;16_8908770_G_C;16_8908245_C_G;16_8907464_G_A;16_8906447_G_A;16_8902777_C_G;16_8892154_A_G;16_8900815_C_T;		0.314356436	False	True	False	True	False	False	9.0	10.0								2	1.58e-11
ENSG00000140682	TGFB1I1	O43294-2	O43294-2	16_31476458_C_T	rs11150624	0.001303253	3.48e-05	1	1.57e-08	0.501919076	3.13e-07	0.649098847	1.02e-08	0.5399885320000001	6.54e-18	0.6588393260000001	True	193	551042.3916	0.365810719	4	0.260669568	False	314,764,583,145,495,000,000,000,000,000,000,000,000,000,000,000,000,000,000,000,000,000,000,000,000,000,000,000,000,000,000,000,000,000,000,000,000,000,000,000,000,000,000,000,000,000,000,000,000,000,000,000,000,000,000,000,000,000,000,000,000,000,000,000				16_31488916_C_G;	16_31483622_C_T;	16_31488916_C_G;		0.435643564	True	False	False	True	False	False	3.0	4.0								17	9.11e-16
ENSG00000140829	DHX38	Q92620	Q92620	16_72256903_T_C	rs12934528	0.016035978	0.000732065	1	3.99e-06	0.609729533	0.000936019	0.555281667	0.00034445	0.232254176	0.181622935	0.111898496	True	202	14755316.88	0.080254004	33	0.099189561	True	72256903								0.163366337	False	False	False	False	False	False	26.0	33.0								0
ENSG00000140876	NUDT7	P0C024	P0C024	16_77769834_G_A	rs308925	0.017626045	0.0008190960000000001	1	1.36e-06	-0.7675423929999999	0.000245542	-0.8644710109999999	4.05e-07	-0.591825634	0.112834101	-0.152232513	True	104	905204.9319	0.287483989	2	0.382052997	False	7,776,983,477,773,630,000,000,000,000,000,000,000,000	16_77769834_G_A;				16_77774409_A_G;16_77773636_T_C;16_77769834_G_A;			0.15594059400000002	False	False	True	True	False	False	2.0	2.0								15	1.01e-12
ENSG00000140905	GCSH	P23434	P23434	16_81118523_T_C	rs12598621	0.048995347	0.002901984	1	1.57e-06	0.5990989760000001	0.0005192840000000001	1.008762238	4.24e-10	1.200025039	1.78e-18	0.746171494	True	202	7500827.305	0.15163100699999998	5	0.17773722100000006	False	8,111,852,381,118,490					16_81118492_T_C;16_81118523_T_C;	16_81118492_T_C;16_81118523_T_C;		0.069306931	False	False	False	True	False	False	5.0	5.0								10	5.0500000000000005e-12
ENSG00000140950	TLDC1	Q6P9B6	Q6P9B6	16_84511485_A_C	rs390892	0.082717252	0.00593252	1	4.53e-06	-0.499089667	0.000563398	-0.51982247	1.07e-07	-0.47018335	9.55e-08	-0.494352159	True	202	3666431.387	0.144782246	10	0.332440876	False	84511485								0.485148515	False	False	False	False	False	False	8.0	10.0								0
ENSG00000140983	RHOT2	Q8IXI1	Q8IXI1	16_718514_C_G	rs7204542	0.003916795	6.49e-05	2	2.84e-09	0.506855292	2.2e-06	0.469306372	0.001955156	0.284191268	0.004638612	0.147261459	True	202	20100406.25	0.14179244300000002	21	0.168902734	True	718514	16_718514_C_G;				16_718514_C_G;	16_718514_C_G;	16_718514_C_G;	0.264851485	False	False	True	True	False	True	18.0	20.0								2	1.16e-14
ENSG00000141295	SCRN2	Q96FV2	Q96FV2	17_45941864_G_A	rs4793684	0.001155893	3.06e-05	1	7.37e-10	-0.5330908089999999	3.579999999999999e-07	-0.719858708	1.85e-08	-0.5657939160000001	8.9e-11	-0.551260133	True	202	3662501.828	0.251034964	11	0.267228531	False	45941864								0.472772277	False	False	False	False	False	False	10.0	11.0								17	1.11e-13
ENSG00000141401	IMPA2	O14732	O14732	18_12028247_A_G	rs612599	0.060491412	0.003915691	1	1.66e-05	0.26894242100000004	3.55e-05	0.358475009	1.36e-11	0.306350512	1.7800000000000002e-05	0.200628055	True	202	5974164.256	0.188469568	10	0.102044441	False	12,028,247,120,298,500,000,000,000,000,000,000,000,000,000,000,000,000,000,000,000,000,000,000,000,000,000,000,000,000,000,000,000,000,000,000,000,000,000,000,000,000,000,000,000,000,000,000,000,000,000					18_12029857_A_G;18_12028247_A_G;	18_12029857_A_G;18_12028247_A_G;		0.381188119	False	False	False	True	False	False	8.0	10.0								4	9.59e-23
ENSG00000141504	SAT2	Q96F10	Q96F10	17_7472733_C_T	rs12939472	0.000189594	3.77e-06	1	1e-09	-0.557567175	9.78e-10	-0.530514835	5.5700000000000006e-27	-0.581059349	4.07e-05	0.299304449	True	194	1235191.665	0.345971234	3	0.417433429	False	747,273,374,686,887,000,000,000,000,000,000,000,000,000,000,000,000,000,000,000,000,000,000,000,000,000,000,000					17_7530271_C_T;17_7530147_G_C;		17_7530271_C_T;	0.440594059	False	False	False	True	False	True	3.0	3.0	17_7482779	rs12942088	Red cell distribution width		Astle-W_eo-baso-sum_EUR_2017;Astle-W_eo-p-gran_EUR_2017;Astle-W_eo-p_EUR_2017;Astle-W_hgb_EUR_2017;Astle-W_neut-p-gran_EUR_2017;GIANT_Waist-adjusted-Smoking_EUR_2017	2.53e-09	1.3e-09	26	4.81e-34
ENSG00000141556	TBCD	Q9BTW9	Q9BTW9	17_80681175_A_G	rs2246558	0.001826837	5.2e-05	1	3.74e-09	-0.5953832729999999	0.000160758	-0.685770193	1.7e-05	-0.596196217	0.000130739	-0.390872456	True	202	38658367.69	0.137348764	47	0.126277518	True	8,068,117,580,663,900,000,000,000,000,000,000,000,000,000,000,000,000,000,000,000,000								0.128712871	False	False	False	False	False	False	44.0	46.0								9	9.19e-08
ENSG00000141698	NT5C3B	Q969T7	Q969T7	17_40022136_T_G	rs12945618	0.012658783	0.000543811	1	3.42e-06	-0.3796252570000001	4.84e-05	-0.572554729	1.27e-37	-1.342211955	4.99e-29	-1.099599092	True	202	4561644.304	0.172666409	10	0.337441604	False	40022136,39975164,39977734,39979062,39979081,39979082,39979267,39980819,39981131,39982151,39982264,39982361,39982990,39983644,39983808,39983820,39983849,39984162,39985493,39985586,39986484,39986654,39986754,39987361,39988601,39989073,39989573,39989592,39989662,39989766,39990357,39991790,39991988,39992584,39992623,39993222,39993485,39993748,39993771,39994879,39994907,39995305,39995453,39996137,399…	17_39983820_G_A;17_39983808_G_C;17_39983805_CCAGAGTTCT_C;	17_39989592_C_CA;17_39989573_AT_A;17_39983805_CCAGAGTTCT_C;			17_39991988_G_A;17_39991790_C_T;17_39990357_T_C;17_39989766_T_C;17_39989662_G_A;17_39989592_C_A;17_39989592_C_CA;17_39989587_TGAGAC_GAGACA;17_39989573_AT_A;17_39989073_C_T;17_39988601_C_T;17_39987361_G_A;17_39986754_T_C;17_39986654_G_A;17_39986484_C_T;17_39985586_C_T;17_39985493_T_C;17_39984162_T_C;17_39983849_G_C;17_39983820_G_A;17_39983808_G_C;17_39983805_CCAGAGTTCT_C;17_39983644_A_C;17_3998299…	17_39991988_G_A;17_39991790_C_T;17_39990357_T_C;17_39989766_T_C;17_39989662_G_A;17_39989592_C_A;17_39989592_C_CA;17_39989587_TGAGAC_GAGACA;17_39989573_AT_A;17_39989073_C_T;17_39988601_C_T;17_39987361_G_A;17_39986754_T_C;17_39986654_G_A;17_39986484_C_T;17_39985586_C_T;17_39985493_T_C;	17_39983849_G_C;	0.29207920800000003	False	True	True	True	False	True	8.0	10.0								47	1.089999999999999e-91
ENSG00000141934	PPAP2C	K7EMK9	K7EMK9	19_288367_C_T	rs12976715	0.084240966	0.006103846	1	7.12e-06	0.442139845	0.000444965	0.391805112	6.29e-16	0.79329954	4.2399999999999996e-17	0.7575560709999999	True	175	644031.6047	0.371857201	2	0.373847369	False	288,367,288,329,288,000					19_288374_T_C;19_288367_C_T;			0.452970297	False	False	False	True	False	False	2.0	2.0								10	1.58e-23
ENSG00000142039	CCDC97	Q96F63	Q96F63	19_41634941_G_A	rs73041339	0.026573699	0.001374877	1	9.28e-07	-0.648883435	0.007757445	-0.459652584	0.012384344	-0.10324902	0.04709422	-0.144940631	False	202	3909379.004	0.15648198300000002	8	0.294856556	False	416,349,414,162,210,000,000,000,000,000,000,000,000,000,000,000,000,000,000,000,000,000,000,000,000,000,000,000,000,000,000,000,000,000,000,000,000,000,000,000,000,000,000,000,000,000,000,000,000,000,000,000,000,000,000,000								0.20049505	False	False	False	False	False	False	7.0	8.0								0
ENSG00000142089	IFITM3	Q01628	Q01628	11_320836_C_T	rs34481144	5.65e-06	7.480000000000001e-08	1	1.07e-14	-0.717302317	1.39e-13	-0.6981426609999999	1.29e-24	-1.011563866	2.9500000000000003e-27	-0.975271162	True	202	2270503.135	0.370245952	2	0.28344536	False	320,836,323,649				11_320836_C_T;	11_323649_C_T;11_320836_C_T;			0.472772277	True	False	False	True	False	False	2.0	2.0					Astle-W_eo-baso-sum_EUR_2017;Astle-W_eo-p-gran_EUR_2017;Astle-W_gran-p-myeloid-wbc_EUR_2017;Astle-W_lymph-p_EUR_2017;Astle-W_mono-p_EUR_2017;Astle-W_neut-p_EUR_2017;Astle-W_plt_EUR_2017	1.00666245	2.0199999999999966e-191	14	2.29e-26
ENSG00000142552	RCN3	Q96D15	Q96D15	19_50017724_C_T	rs2878342	0.06569548900000001	0.004421738	1	1.4e-05	0.862457878	0.019295382	0.72588712	0.000463798	0.576052276	3.45e-05	0.541314933	True	202	2708853.88	0.2175476	8	0.236070446	False	50017724,50018248,50018252,50018790,50019803,50020823,50021325,50021639,50021790,50022351,50023442,50023455,50023603,50024411,50025728,50027533,50028040,50028620,50028915,50030541,50030701,50031146,50031350,50032160,50032865,50032980,50033185,50033707,50034039,50034045,50034101,50035829,50036306,50036570,50036597,50036634,50037384,50037422,50037446,50038072,50038220,50039207,50040152,50040271,500…	19_50045878_C_G;	19_50049141_AG_A;19_50048063_GA_G;19_50047059_AAAAC_A;19_50046759_C_CA;19_50046729_CT_C;19_50046226_C_CAG;19_50041226_CT_C;19_50041064_AT_A;19_50040271_GA_G;19_50039207_TTAAA_T;19_50033185_GTATTTTTATTTTT_G;	19_50046365_T_C;19_50042371_T_C;19_50037446_C_G;	19_50046759_C_CA;19_50046729_CT_C;19_50046473_A_C;19_50031146_C_T;	19_50049882_T_G;19_50049870_C_T;19_50049640_G_A;19_50049460_G_A;19_50049421_A_G;19_50049375_T_C;19_50049374_A_G;19_50049314_G_A;19_50049141_AG_A;19_50048817_A_T;19_50048804_G_A;19_50048711_T_C;19_50048507_T_G;19_50048488_A_G;19_50048177_G_A;19_50048063_GA_G;19_50047487_T_C;19_50047458_C_T;19_50047311_A_G;19_50047224_C_T;19_50047059_AAAAC_A;19_50047054_A_G;19_50046941_C_T;19_50046924_A_G;19_500467…		19_50046437_C_T;19_50046365_T_C;19_50045916_T_C;	0.071782178	True	True	True	True	True	True	7.0	7.0	19_50045916;19_50045916	rs34459162;rs34459162	Fructosamine levels;Total glycated albumin levels	5E-9;4E-8				10	2.0100000000000003e-23
ENSG00000142657	PGD	P52209-2	P52209-2	1_10451582_C_G	rs11578694	0.028613916	0.001527326	1	1.16e-06	0.219866685	0.062168062	0.660502157	7.540000000000002e-07	0.405991459	1.15e-09	0.410269516	True	202	121307400.8	0.141986909	31	0.088521692	False	10451582,10237960,10247143,10251449,10252185,10258343,10259917,10262846,10263824,10265606,10265998,10266671,10268170,10268852,10270496,10270715,10271540,10272562,10273916,10274441,10276718,10276719,10277357,10277497,10277858,10277898,10283589,10284659,10290268,10290421,10290500,10291166,10291874,10292888,10296452,10298601,10300032,10302596,10302776,10303942,10305711,10307453,10310214,10310399,103…	1_10460485_T_C;				1_10479678_G_A;1_10478727_G_A;1_10475120_G_C;1_10471789_A_T;1_10469641_A_G;1_10468946_G_A;1_10466111_C_T;1_10466046_A_G;1_10465299_G_A;1_10461107_T_C;1_10460485_T_C;1_10459779_G_A;	1_10461107_T_C;1_10460485_T_C;1_10459779_G_A;	1_10473196_C_T;1_10460485_T_C;	0.29207920800000003	False	False	True	True	False	True	27.0	31.0								7	4.17e-27
ENSG00000143153	ATP1B1	P05026-2	P05026-2	1_169176590_T_C	rs1080266	0.020015875	0.000967641	1	4.72e-07	-0.3917069970000001	5.72e-08	-0.462968418	0.00023882900000000005	-0.28432041	2.28e-08	-0.455064748	True	202	17256895.86	0.208003195	10	0.191158686	False	169,176,590,169,159,000,000,000,000,000,000,000,000,000,000								0.49009901	False	False	False	False	False	False	10.0	10.0								1	3.58e-06
ENSG00000143156	NME7	Q9Y5B8	Q9Y5B8	1_169380254_C_T	rs7554853	0.061208115	0.004005073	1	6.54e-06	-0.301536375	0.0007937310000000001	-0.313690318	1.31e-18	-0.30335284	0.0014824570000000002	0.244598628	True	202	7255365.057999997	0.15292662199999998	13	0.191104299	False	169380254,169272299,169276143,169277012,169279196,169279707,169280642,169281036,169285485,169286172,169286785,169286792,169288266,169291205,169292840,169293721,169296496,169296499,169297307,169300818,169303396,169303752,169304858,169305269,169306013,169308424,169313892,169314833,169376867,169383257,169401890,169403703,169403780,169414245,169417525		1_169303396_G_GTC;1_169288266_ATTTAAT_A;1_169286172_GA_G;1_169279196_TA_TAAA;			1_169314833_A_G;1_169308424_A_G;1_169306013_T_C;1_169305269_C_T;1_169304858_T_C;1_169303752_A_G;1_169303396_G_GTC;1_169300818_A_G;1_169297307_A_G;1_169296499_A_G;1_169296496_C_T;1_169293721_G_A;1_169292840_T_A;1_169291205_G_A;1_169288266_ATTTAAT_A;1_169286792_G_A;1_169286785_G_A;1_169286172_GA_G;1_169285485_C_A;1_169281036_T_C;1_169280642_G_A;1_169279707_T_C;1_169279196_TA_TAAA;1_169277012_A_C;1_…	1_169314833_A_G;1_169308424_A_G;1_169306013_T_C;1_169305269_C_T;1_169304858_T_C;1_169303752_A_G;1_169303396_G_GTC;1_169300818_A_G;1_169297307_A_G;1_169296499_A_G;1_169296496_C_T;1_169293721_G_A;1_169292840_T_A;1_169291205_G_A;1_169288266_ATTTAAT_A;1_169286792_G_A;1_169286785_G_A;1_169286172_GA_G;1_169285485_C_A;1_169281036_T_C;1_169280642_G_A;1_169279707_T_C;1_169279196_TA_TAAA;1_169277012_A_C;1_…	1_169293721_G_A;	0.475247525	False	True	False	True	False	True	12.0	13.0								27	1.87e-49
ENSG00000143198	MGST3	Q5VV89	Q5VV89	1_165601466_G_A	rs9333378	0.010758488	0.000447063	1	6.06e-07	-0.401855127	0.00043753	-0.32472798	1.88e-21	-0.566934795	8.68e-12	-0.497800438	True	202	14661063.32	0.232847748	6	0.25520971	False	165601466			1_165601466_G_A;		1_165601466_G_A;			0.353960396	False	False	False	True	True	False	6.0	6.0								10	4.3499999999999995e-28
ENSG00000143228	NUF2	Q9BZD4	Q9BZD4	1_163301327_C_T	rs1605763	0.002566201	7.75e-05	1	3.68e-07	-0.361690988	0.000179194	-0.395928421	2.73e-11	-0.591618857	7.7e-26	-0.696190458	True	202	14795845.42	0.12902438800000002	18	0.118715957	True	163,301,327,163,292,000,000,000,000,000,000,000,000,000,000,000,000,000,000,000,000,000,000,000,000,000,000,000,000,000					1_163322643_G_A;1_163320857_A_C;1_163313810_T_C;1_163313262_G_A;1_163312387_A_G;1_163308819_G_C;1_163292040_T_C;1_163301327_C_T;	1_163313810_T_C;1_163313262_G_A;1_163312387_A_G;1_163308819_G_C;1_163292040_T_C;1_163301327_C_T;		0.30693069300000003	False	False	False	True	False	False	16.0	17.0								3	9.88e-08
ENSG00000143320	CRABP2	P29373	P29373	1_156660311_C_T	rs4384231	0.014757955	0.000656447	1	3.4e-06	-0.285186088	0.000255171	-0.30381936800000003	3.09e-07	-0.208619332	4.7e-07	-0.19610194600000005	True	202	35517176.99	0.373682442	11	0.12973399900000002	False	156,660,311,156,656,000,000,000,000,000,000,000,000,000,000,000,000,000,000,000,000,000,000,000,000,000,000								0.294554455	False	False	False	False	False	False	10.0	11.0								1	7.24e-11
ENSG00000143337	TOR1AIP1	Q5JTV8	Q5JTV8	1_179853096_G_C	rs480498	3.3e-06	3.9e-08	1	8.09e-14	-0.7304236279999999	6.520000000000001e-07	-0.69492139	1.1099999999999998e-35	-1.271812772	3.510000000000001e-29	-1.054491097	True	202	14390691.17	0.125263384	16	0.151532199	False	179853096,179804441,179806890,179807281,179807938,179808322,179813352,179813499,179814457,179817654,179818132,179820868,179823825,179824377,179824405,179826030,179839548,179842107,179845022,179846123,179847635,179850543,179852074,179852552,179854797,179857781,179858333,179858444,179858787,179859333,179860683,179861079,179862404,179863237,179863796,179863922,179864759,179869700,179870919,179871712…	1_179876988_C_G;1_179852074_T_C;	1_179869700_TAA_T;1_179860683_TTTTATTTTTATTTATTTA_T;1_179858787_CT_C;	1_179858444_G_A;	1_179894001_T_C;1_179893810_G_C;1_179893352_C_T;1_179892125_T_C;1_179892028_G_A;1_179891092_C_T;1_179888228_G_C;1_179887681_G_C;	1_179885939_A_G;1_179885433_A_G;1_179883494_G_A;1_179881004_A_C;1_179880917_A_C;1_179879604_T_A;1_179879185_C_T;1_179879039_C_T;1_179871712_G_A;1_179870919_A_C;1_179869700_TAA_T;1_179864759_G_A;1_179863922_C_T;1_179863796_C_A;1_179863237_G_T;1_179862404_A_C;1_179861079_C_T;1_179860683_TTTTATTTTTATTTATTTA_T;1_179859333_G_A;1_179858787_CT_C;1_179858444_G_A;1_179858333_C_T;1_179857781_A_G;1_17985479…			0.408415842	True	True	True	True	True	False	15.0	17.0					Astle-W_mono-p_EUR_2017	9.5e-10	2.36e-11	2	3.96e-08
ENSG00000143353	LYPLAL1	Q5VWZ2	Q5VWZ2	1_219307899_G_A	rs7543820	0.02113233	0.001030564	1	4.39e-06	0.780641083	0.000344369	0.751970255	1.02e-06	0.822553955	0.000107315	0.443190177	True	202	4660527.905	0.15999721	7	0.248774167	False	219307899,219255926,219257881,219261881,219263451,219269798,219273321,219285086,219299794,219301137,219301536,219308549,219317760,219319818,219320846,219321179,219323278,219325260,219327039,219332058,219333297,219337087,219337088,219340555,219345611,219355789,219359550,219360899,219362677,219368348,219402694,219434000,219451036,219454644,219455850,219457258,219458919,219459987,219463484,219463867…					1_219368348_G_T;1_219362677_A_T;1_219360899_T_A;1_219359550_A_G;1_219355789_A_G;			0.081683168	False	False	False	True	False	False	5.0	6.0								6	4.120000000000001e-13
ENSG00000143401	ANP32E	Q9BTT0	Q9BTT0	1_150439038_A_T		0.059908447	0.001931965	2	1.11e-05	-0.286741944	0.014470022	-0.225892179	1.64255894	-0.111071488	0.897519159	-0.006184726999999999	False	202	23190204.58	0.153910923	11	0.131904744	False	150439038								0.366336634	False	False	False	False	False	False	8.0	11.0								0
ENSG00000143416	SELENBP1	Q13228	Q13228	1_151344741_T_G	rs2769264	0.008139264	0.00032393200000000003	1	2.16e-07	0.420965981	0.00690768	0.5488454779999999	0.000332412	0.39052171	0.001076207	0.24306496	True	202	9997868.148	0.17017651600000006	19	0.129269506	True	151,344,741,151,344,000,000,000,000,000,000,000					1_151344150_C_A;1_151344741_T_G;	1_151344150_C_A;1_151344741_T_G;		0.202970297	False	False	False	True	False	False	19.0	19.0	1_151344741	rs2769264	Blood trace element (Cu levels)					4	9.999999999999999e-32
ENSG00000143632	ACTA1	P68133	P68133	1_229534893_G_A	rs571951	0.007246698	0.000282471	1	1.38e-08	0.834366928	2.55e-08	0.868398077	4.400000000000001e-19	0.991608314	2.88e-20	0.994049848	True	101	163167.8233	0.7653744459999999	1	0.36025122299999995	False	229,534,893,229,535,000,000,000,000,000,000,000,000,000,000,000,000,000,000,000,000,000,000,000,000,000,000,000,000,000								0.170792079	False	False	False	False	False	False	1.0	1.0								0
ENSG00000143641	GALNT2	Q10471	Q10471	1_230310414_G_A	rs621328	0.034213726	0.001890305	1	5.24e-06	-0.511544446	0.210512712	-0.392918022	0.03655898	-0.14712757099999998	0.009097102	-0.168350943	True	202	25994813.16	0.180045061	26	0.207733537	False	230310414,230294185,230294989,230295245,230296470,230296492,230305477,230309481,230309771,230310069,230310728,230310736,230310740,230311176,230311677,230311918,230312704,230313651,230313662,230313911,230314291,230314396,230314954,230315242,230316444,230317018,230317820,230318402,230320156,230320428,230320600,230322122,230322708,230324119,230324145,230324173,230324364,230325027,230326412		1_230296469_AC_A;			1_230326412_G_A;1_230325027_C_G;1_230324364_T_C;1_230324173_C_T;1_230324145_G_T;1_230324119_G_A;1_230322708_A_G;1_230322122_C_G;1_230320600_G_A;1_230320428_G_A;1_230320156_C_T;1_230318402_C_T;1_230317820_G_A;1_230317018_C_T;1_230316444_T_A;1_230315242_A_G;1_230314954_G_A;1_230314396_A_G;1_230314291_A_G;1_230313911_T_C;1_230313662_A_G;1_230313651_C_G;1_230312704_C_T;1_230311918_G_A;1_230311677_G_A…			0.178217822	False	True	False	True	False	False	24.0	26.0								0
ENSG00000143653	SCCPDH	Q8NBX0	Q8NBX0	1_246913506_C_T	rs72764632	0.0017236760000000002	4.820000000000001e-05	1	5.72e-08	-0.958917945	8.290000000000001e-05	-0.773992239	0.116404397	0.190600648	0.034881092	0.299306825	False	202	5865810.3029999975	0.158488102	12	0.287832199	False	246,913,506,246,930,000	1_246930564_G_C;				1_246913506_C_T;			0.091584158	False	False	True	True	False	False	10.0	10.0								1	3.42e-06
ENSG00000143858	SYT2	Q8N9I0	Q8N9I0	1_202636986_A_G	rs4950787	0.004165569	0.000139628	1	3.56e-08	0.461997675	1.3800000000000007e-05	0.611433687	1.29e-12	0.48981663	1.57e-13	0.507168266	True	201	1460636.499	0.35667378200000005	7	0.270240818	False	202636986,202633060,202633484,202635311,202636099,202636691,202637815,202638140,202638504,202638790,202638960,202640076,202640406,202640696,202640955,202641290,202641340,202642015,202643007,202643208,202644038,202646263,202647540,202648485,202650625,202655107,202660669,202664437		1_202647540_CG_C;1_202644038_G_GTCTCCTCTTTATGAGAGGTCAC;			1_202664437_A_G;1_202660669_C_T;1_202655107_A_G;1_202650625_A_C;1_202648485_A_C;1_202647540_CG_C;1_202646263_G_T;1_202644038_G_C;1_202644038_G_GTCTCCTCTTTATGAGAGGTCAC;1_202643208_G_A;1_202643007_A_G;1_202642015_G_A;1_202641340_G_A;1_202641290_C_T;1_202640955_A_G;1_202640696_C_G;1_202640406_A_G;1_202640076_A_G;1_202638960_C_T;1_202638790_G_A;1_202638504_A_G;1_202638140_C_T;1_202637815_C_T;1_202636…			0.408415842	False	True	False	True	False	False	7.0	7.0								0
ENSG00000143891	GALM	Q96C23	Q96C23	2_38894528_G_A	rs7574493	0.097503719	0.007395810999999999	1	0.000116753	0.368753904	0.00033694300000000003	0.424442433	2.11e-12	0.733956446	2.2100000000000003e-11	0.6358787379999999	True	202	10148209.31	0.154897474	13	0.13196415	False	388,945,283,888,740,000,000,000,000,000,000,000,000,000,000,000,000,000,000,000,000,000,000,000,000,000,000,000,000,000,000,000,000,000,000,000,000,000,000,000,000,000,000,000,000,000,000,000,000,000,000,000,000,000,000,000,000,000,000,000,000,000,000,000		2_38894510_GACCAGCCTGGCCAGCATGGTGAAACCCTGTCTCTACTAAAAATACAAAAAAATTAGCTGAGCATGGTGGCACGTGCCTGTAATCCCAGCTAGTCAGGAGGCTGAGGCAGGAGAATAGCTTGAACCCAGGAGGCGGAGGTTGCAGTGAGCCAAGATTGCGCCACTGCACTCCAGCGTGGGTGGCAGAGCGAAACTCTATCTTAAAAAACAGAGAGCAAATTTCAATTCCTCAGGGAAAAAAACAAAACTCAGCTTTCTGTTGAACACCACCATGCCCGGCTAATTTTTTTGTGTTTTTGGTAGAGATGGGGTTTCACCATGTTGGCCAG_G;		2_38893184_G_A;	2_38897074_G_A;2_38896783_C_T;2_38896631_C_T;2_38895674_G_A;2_38895612_T_C;2_38895358_C_T;2_38895091_A_G;2_38894960_C_T;2_38894870_T_C;2_38893973_C_G;2_38893950_C_T;2_38893677_G_A;2_38893660_A_G;2_38894528_G_A;2_38894510_GACCAGCCTGGCCAGCATGGTGAAACCCTGTCTCTACTAAAAATACAAAAAAATTAGCTGAGCATGGTGGCACGTGCCTGTAATCCCAGCTAGTCAGGAGGCTGAGGCAGGAGAATAGCTTGAACCCAGGAGGCGGAGGTTGCAGTGAGCCAAGATTGCGCCACTGCACTCCAGCGTG…	2_38897074_G_A;2_38896783_C_T;2_38896631_C_T;2_38895674_G_A;2_38895612_T_C;2_38895358_C_T;2_38895091_A_G;2_38894960_C_T;2_38894870_T_C;2_38893973_C_G;2_38893950_C_T;2_38893677_G_A;2_38893660_A_G;2_38894528_G_A;2_38894510_GACCAGCCTGGCCAGCATGGTGAAACCCTGTCTCTACTAAAAATACAAAAAAATTAGCTGAGCATGGTGGCACGTGCCTGTAATCCCAGCTAGTCAGGAGGCTGAGGCAGGAGAATAGCTTGAACCCAGGAGGCGGAGGTTGCAGTGAGCCAAGATTGCGCCACTGCACTCCAGCGTG…		0.101485149	True	True	False	True	False	False	12.0	13.0								11	1.74e-26
ENSG00000144120	TMEM177	Q53S58	Q53S58	2_120439230_C_G	rs1983406	0.057803485	0.00366727	1	0.00010901	0.457704257	0.0054475	0.69839439	3.06e-25	0.96741521	3.32e-31	0.861590152	True	184	761772.4534	0.181561715	3	0.316743261	False	120439230,120414833,120416199,120416787,120417294,120419424,120420151,120421671,120421947,120423530,120424007,120424451,120425889,120428593,120429518,120431150,120431274,120431751,120432159,120432619,120432637,120434018,120434403,120434776,120435153,120435393,120436773,120438523,120439459,120439841,120440071,120441105,120441309,120441333,120442111,120442452,120442608,120443014,120443443,120443665…	2_120438523_A_G;2_120439230_C_G;			2_120439459_C_A;2_120436773_A_G;				0.188118812	True	False	True	False	False	False	3.0	3.0	2_120443014;2_120443014;2_120443665	rs2177095;rs2177095;rs7571822	Highest math class taken (MTAG);Self-reported math ability (MTAG);Self-reported math ability	6E-12;4E-13;2E-13				10	3.74e-22
ENSG00000144199	FAHD2B	Q6P2I3	Q6P2I3	2_97837911_C_T	rs2924021	0.029789269	0.001607498	1	4.95e-07	0.654820553	0.000305465	0.921369183	2.57e-07	0.6022482570000001	3.03e-05	0.349015433	True	119	561721.9194	0.295183556	2	0.320941061	False	97837911,97629886,97630362,97631882,97631982,97633814,97635314,97641267,97643576,97645080,97647616,97655963,97667450,97669032,97675870,97679933,97683361,97685741,97693966,97694551,97700870,97707562,97708011,97708611,97708740,97709260,97710299,97710803,97711102,97711105,97711764,97712339,97712540,97712730,97712731,97714031,97714323,97716168,97717342,97732822,97735239,97736260,97739057,97742613,977…		2_97754405_AG_A;			2_97758953_G_A;2_97757509_C_T;2_97754405_AG_A;2_97754165_G_A;2_97753585_G_A;2_97750883_G_A;			0.215346535	False	True	False	True	False	False	2.0	2.0								19	2.4999999999999998e-33
ENSG00000144366	GULP1	Q9UBP9	Q9UBP9	2_189199195_A_G	rs7566619	3.49e-06	4.2e-08	1	2.7400000000000004e-12	-0.524059494	4.45e-07	-0.528769988	5.28e-19	-0.650173551	1.92e-22	-0.740317723	True	202	17518970.87	0.1702865	16	0.145881998	False	189199195,189154111,189158769,189160338,189161309,189164442,189166469,189167273,189167807,189168555,189169235,189171810,189172163,189173297,189173347,189173613,189174910,189176708,189177128,189177435,189177631,189177697,189181348,189185747,189185755,189190362,189190704,189192535,189202876,189206528,189206852,189207372,189213721,189214693,189216219,189233550,189237457,189240710,189242527,189246754…		2_189161309_A_AGT;		2_189158769_A_G;	2_189308601_G_A;2_189308284_A_G;2_189298660_C_T;2_189297751_C_A;2_189289487_A_G;2_189288305_A_G;2_189288234_G_C;2_189287251_C_T;2_189281629_G_A;2_189271456_G_A;2_189261885_C_G;2_189260967_G_T;2_189253343_A_G;2_189246754_A_G;2_189242527_C_T;2_189240710_G_A;2_189237457_C_A;2_189233550_T_C;2_189216219_T_C;2_189214693_A_G;2_189213721_T_A;2_189207372_A_G;2_189206852_A_G;2_189206528_A_G;2_189202876_A_G…			0.48019802	True	True	False	True	False	False	15.0	16.0								8	8.679999999999999e-15
ENSG00000144559	TAMM41	Q96BW9-3	Q96BW9-3	3_11822934_T_C	rs4684809	9.41e-09	5.84e-11	1	1.77e-14	0.669784602	8.26e-13	0.915457487	2.5e-26	0.751476653	1.94e-15	0.7128911309999999	True	202	7898338.345	0.192985935	13	0.126090497	False	11822934,11819683,11820852,11821126,11822370,11823238,11823265,11824300,11824319,11824511,11825712,11827936,11828825,11829474,11830536,11831670,11839966,11840903,11840929,11841444,11842203,11842354,11842860,11842883,11843908,11845051,11845285,11846527,11847299,11849807,11850367,11851941,11853167,11853436,11853638,11856570,11859653,11860109,11864427,11865336,11868783,11872382,11875444,11878732		3_11868783_CT_C;	3_11849807_A_C;	3_11850367_G_T;	3_11878732_T_C;3_11875444_A_G;3_11872382_T_C;3_11868783_C_T;3_11868783_CT_C;3_11865336_G_T;3_11864427_G_A;3_11860109_A_G;3_11859653_G_C;3_11856570_A_G;3_11853638_C_G;3_11853436_C_G;3_11853167_T_C;3_11851941_A_C;3_11850367_G_T;3_11849807_A_C;3_11847299_C_G;3_11846527_A_G;3_11845285_G_C;3_11845051_A_G;3_11843908_A_G;3_11842883_A_G;3_11842860_T_C;3_11842354_T_C;3_11842203_G_A;3_11841444_C_G;3_118409…	3_11878732_T_C;3_11875444_A_G;3_11872382_T_C;3_11868783_C_T;3_11868783_CT_C;3_11865336_G_T;3_11864427_G_A;3_11860109_A_G;3_11859653_G_C;3_11856570_A_G;3_11853638_C_G;3_11853436_C_G;3_11853167_T_C;3_11851941_A_C;3_11850367_G_T;3_11849807_A_C;3_11847299_C_G;3_11846527_A_G;3_11845285_G_C;3_11845051_A_G;3_11843908_A_G;3_11842883_A_G;3_11842860_T_C;3_11842354_T_C;3_11842203_G_A;3_11841444_C_G;3_118409…		0.452970297	True	True	False	True	True	False	13.0	13.0								45	1.2399999999999987e-97
ENSG00000144566	RAB5A	P20339	P20339	3_19990932_G_A	rs35172759	0.012411628	0.00052598	1	3.51e-07	-0.430325797	0.029023925	-0.26978024	6.61e-06	-0.39561011	3.89e-11	-0.383533657	True	202	16952491.26	0.09652523	10	0.127038406	True	1,999,093,219,989,500,000,000,000,000,000,000,000,000,000,000,000,000,000,000,000,000		3_19994473_ATG_A;			3_19995611_G_A;3_19994475_G_A;3_19994473_ATG_A;3_19994271_G_A;3_19989736_A_G;3_19989504_T_C;3_19990932_G_A;	3_19995611_G_A;3_19994475_G_A;3_19994473_ATG_A;3_19994271_G_A;3_19989736_A_G;3_19989504_T_C;3_19990932_G_A;		0.482673267	False	True	False	True	False	False	10.0	10.0								1	1.42e-05
ENSG00000144712	CAND2	O75155	O75155	3_12826771_C_G	rs77715467	0.014008274	0.000618181	1	1.44e-06	0.8057865790000001	0.00034534	0.901687337	1.98e-09	0.996929647	1.45e-13	1.312632153	True	202	6779065.9739999985	0.150527472	29	0.169325858	False	###############################################################################################################################################################################################################################################################					3_12859500_A_G;3_12856144_G_C;3_12855693_C_T;3_12854626_T_C;3_12853038_C_T;3_12850963_T_C;3_12847318_C_T;3_12845349_A_G;3_12845308_G_A;3_12842975_C_T;3_12842430_C_T;3_12841073_G_A;3_12839843_C_G;3_12839552_C_A;3_12839413_T_C;	3_12853038_C_T;3_12850963_T_C;3_12847318_C_T;3_12845349_A_G;3_12845308_G_A;3_12842975_C_T;3_12842430_C_T;3_12841073_G_A;3_12839843_C_G;3_12839552_C_A;3_12839413_T_C;	3_12858822_C_T;	0.061881188	False	False	False	True	False	True	16.0	18.0								8	4.99e-14
ENSG00000144848	ATG3	Q9NT62	Q9NT62	3_112185881_C_T	rs9854311	0.093644564	0.006986178000000001	1	2.32e-05	0.544063698	0.005129243	0.555767604	0.051076508	0.604880515	0.039074883	0.248069351	False	202	8995962.787999999	0.155052755	10	0.111848839	False	112,185,881,112,184,000,000,000,000,000,000,000,000,000,000								0.056930693	False	False	False	False	False	False	7.0	8.0								0
ENSG00000145725	PPIP5K2	O43314-2	O43314-2	5_102382498_C_G	rs7711143	5.799999999999997e-21	2.04e-24	1	1.11e-32	1.131079909	8.06e-22	1.152523702	1.1299999999999998e-32	0.960348817	6.9e-41	1.09165135	True	202	7995873.681	0.160087113	23	0.126790521	False	102382498,102306061,102306322,102306779,102307471,102307592,102312538,102313683,102313939,102314057,102314227,102317042,102317117,102317418,102318974,102319037,102321905,102322448,102323766,102324397,102325618,102325878,102326696,102327463,102327869,102328051,102328490,102328878,102330049,102330256,102331721,102333105,102334247,102334722,102336571,102337170,102337740,102339110,102339222,102339552…		5_102543730_TTTGTTTTTG_T;5_102540531_T_TTA;5_102540036_C_CCTAG;5_102512853_CAT_C;5_102512853_CA_C;5_102512345_ATGT_A;5_102493405_C_CA;5_102481486_C_CAGTT;5_102479504_C_CCACA;5_102473615_C_CTT;		5_102547302_C_T;5_102545693_A_G;5_102545163_T_G;5_102543878_A_G;5_102543730_TTTGTTTTTG_T;5_102540531_T_TTA;5_102540522_C_T;5_102540366_A_G;5_102540201_A_G;5_102540036_C_CCTAG;5_102538752_T_C;5_102537379_A_G;	5_102534629_T_A;5_102531919_C_T;5_102531808_G_A;5_102529719_T_C;5_102529401_G_A;5_102528092_T_C;5_102526175_T_C;5_102518795_A_G;5_102512853_CAT_C;5_102512853_CA_C;5_102512803_C_T;5_102512447_C_G;5_102512345_ATGT_A;5_102510923_T_C;5_102507812_T_C;5_102506864_G_C;5_102499144_A_G;5_102498881_G_T;5_102493405_C_CA;5_102491502_A_G;5_102489511_T_G;5_102488571_T_C;5_102486723_G_C;5_102481486_C_CAGTT;5_10…		5_102520400_A_C;	0.284653465	True	True	False	True	False	True	23.0	23.0	5_102318974;5_102365794	rs10463554;rs26431	Parkinson's disease;Feeling worry		Astle-W_mch_EUR_2017;Astle-W_mcv_EUR_2017;Astle-W_rbc_EUR_2017;GIANT_BMI-M_Mixed_2015	0.4999995	7.42e-26	18	7.79e-47
ENSG00000145882	PCYOX1L	Q8NBM8	Q8NBM8	5_148710856_T_A	rs56335255	0.020839485	0.001009897	1	7.590000000000002e-07	0.393179971	3.23e-07	0.480517753	9.68e-18	0.589308842	2.42e-25	0.6909387140000001	True	202	2095186.581	0.282583911	6	0.430014923	False	148,710,856,148,712,000,000,000,000,000,000,000,000,000,000,000,000,000,000,000,000,000,000,000,000,000,000	5_148737644_G_C;					5_148737644_G_C;		0.309405941	False	False	True	False	False	False	5.0	6.0								28	6.22e-25
ENSG00000145996	CDKAL1	Q5VV42	Q5VV42	6_21227771_T_C		0.092060727	0.0068105330000000006	1	6.84e-06	-0.322772725	0.092226027	-0.316946718	0.678879984	-0.109432243	0.095559054	-0.108088418	False	202	15474964.16	0.097115006	29	0.070037037	False	2,122,777,121,228,880					6_21228888_A_G;6_21227771_T_C;			0.381188119	False	False	False	True	False	False	22.0	29.0								0
ENSG00000146085	MUT	P22033	P22033	6_49342503_A_G		0.00380104	0.00012547	1	3.76e-07	-0.518344884	0.150430956	-0.307653602	1.13e-06	-0.3902179670000001	1.64e-07	-0.552562084	True	202	29469794.93	0.106629827	26	0.125865079	False	49342503,49277828,49282121,49289141,49291454,49291486,49299830,49302446,49319473,49321223,49329899,49339036,49343264,49345257,49345867,49349386,49353876,49354759,49354766,49357666,49362123,49362671,49364440,49369399,49370321,49382605,49388620,49392845,49395242,49402319,49411886,49411887,49412747,49413976,49415448,49419622,49445020,49451129,49462017,49463493,49463970,49465096,49465217,49465379,494…	6_49415448_C_T;	6_49412747_CAT_C;6_49399572_GTTGAAAGAATGTGTTTAATTAATAAGAGCCACTATTTCCATTTTCACGGAAATAAAACCCTATCCTTTCTTCTTTGTCACTCAATTACCCAAAACCTTCTCAACTGGTATACTACTGGCATTTGGGGCTAAAAAATTCTTCCTTGATTGGGAGTGCTACTAATAGTCATCAGCACCAGCCTCCCAGCCCAAGTTATTTAAAAAACAAAACACTCCGCCCATTTTCTAAATGCCTCTATGTGTTGCTTGTGGTAGGAAGCTGGATATCCTGACTGAGAACTTCTGAGCCTTAAGCCATAATTTTCTCTCACCTAAATTTTCACTAGTTGTCATTATGTGTGTTAAATTTAGTATGATGTGATAAGTTTGAG…	6_49399572_GTTGAAAGAATGTGTTTAATTAATAAGAGCCACTATTTCCATTTTCACGGAAATAAAACCCTATCCTTTCTTCTTTGTCACTCAATTACCCAAAACCTTCTCAACTGGTATACTACTGGCATTTGGGGCTAAAAAATTCTTCCTTGATTGGGAGTGCTACTAATAGTCATCAGCACCAGCCTCCCAGCCCAAGTTATTTAAAAAACAAAACACTCCGCCCATTTTCTAAATGCCTCTATGTGTTGCTTGTGGTAGGAAGCTGGATATCCTGACTGAGAACTTCTGAGCCTTAAGCCATAATTTTCTCTCACCTAAATTTTCACTAGTTGTCATTATGTGTGTTAAATTTAGTATGATGTGATAAGTTTGAGCCTAAAAAACTATTTTC…		6_49419622_T_C;6_49413976_A_G;6_49412747_CAT_C;6_49411887_G_T;6_49411886_G_A;6_49402319_T_C;6_49399572_GTTGAAAGAATGTGTTTAATTAATAAGAGCCACTATTTCCATTTTCACGGAAATAAAACCCTATCCTTTCTTCTTTGTCACTCAATTACCCAAAACCTTCTCAACTGGTATACTACTGGCATTTGGGGCTAAAAAATTCTTCCTTGATTGGGAGTGCTACTAATAGTCATCAGCACCAGCCTCCCAGCCCAAGTTATTTAAAAAACAAAACACTCCGCCCATTTTCTAAATGCCTCTATGTGTTGCTTGTGGTAGGAAGCTGGATATCCTGACTGAGAACTTCTGAGCCTTAAGCC…			0.131188119	False	True	True	True	True	False	18.0	26.0								5	4.29e-07
ENSG00000146282	RARS2	Q5T160	Q5T160	6_88268288_T_C		0.012548071	0.000536117	1	1.21e-06	-0.451504272	0.000448015	-0.382098344	1.14e-07	-0.340185574	4e-10	-0.437986824	True	202	9748506.462	0.122888064	25	0.15397854	False	###############################################################################################################################################################################################################################################################		6_88280888_GT_G;			6_88298414_C_A;6_88289693_G_A;6_88280888_GT_G;6_88251315_G_A;6_88251007_G_A;6_88250935_T_C;6_88250589_G_T;6_88248476_G_A;6_88245155_A_G;6_88237200_T_C;6_88236001_A_G;6_88234543_C_T;6_88231443_A_G;6_88230732_G_A;6_88268288_T_C;			0.430693069	False	True	False	True	False	False	17.0	25.0								3	7.790000000000001e-11
ENSG00000146530	VWDE	Q8N2E2	Q8N2E2	7_12428803_G_A	rs848016	1.81e-08	1.2e-10	1	5.86e-15	-0.6444636970000001	7.95e-13	-1.032908971	7.049999999999998e-33	-0.971849228	3.2699999999999996e-33	-1.024728182	True	201	1424125.987	0.491341645	9	0.32976672	False	124,288,031,240,447,000,000,000,000,000,000,000,000,000,000,000,000,000,000,000,000,000,000,000,000,000,000,000,000,000,000,000,000,000,000,000,000,000,000,000,000,000,000,000,000,000,000,000	7_12428803_G_A;				7_12439392_A_C;7_12435765_C_T;7_12434771_T_C;7_12429112_T_C;7_12422721_T_C;7_12418938_G_C;7_12418863_C_T;7_12418514_C_G;7_12406186_G_A;7_12404475_C_G;	7_12439392_A_C;7_12435765_C_T;7_12434771_T_C;7_12429112_T_C;7_12422721_T_C;7_12418938_G_C;7_12418863_C_T;7_12418514_C_G;7_12406186_G_A;7_12404475_C_G;7_12428803_G_A;		0.467821782	False	False	True	True	False	False	9.0	9.0								24	3.38e-29
ENSG00000146535	GNA12	Q03113	Q03113	7_2602448_A_G	rs2917722	0.072599405	0.004996892	1	2.54e-05	0.755968955	0.065007213	0.42250463	0.052190556	0.469875731	0.33038115100000004	0.091110218	False	202	3316685.143	0.14924171	9	0.182445185	True	26,024,482,599,326								0.061881188	False	False	False	False	False	False	3.0	4.0								0
ENSG00000146540	C7orf50	Q9BRJ6	Q9BRJ6	7_1195796_T_C	rs12702434	4.79e-08	1.85e-10	2	7.09e-16	-0.865248437	5.21e-13	-0.774798045	2.84e-16	-0.873389036	4.81e-05	-0.32867162	True	202	12672996.36	0.192861004	8	0.165124783	False	1195796								0.47029703	False	False	False	False	False	False	7.0	8.0					Astle-W_mpv_EUR_2017;Astle-W_plt_EUR_2017;GLGC_HDL_EUR_2013	0.09557148	0.00260278	0
ENSG00000146701	MDH2	P40926	P40926	7_75852140_A_G	rs1894760	9.09e-09	5.5299999999999986e-11	1	6.13e-18	-0.832261696	7.98e-11	-0.646801155	1.58e-21	-0.7146414870000001	2.93e-24	-0.653406968	True	202	238694294.0	0.122822416	19	0.127671783	False	75852140,75628101,75628669,75629533,75631697,75642107,75651665,75651814,75653944,75657719,75658197,75659815,75662056,75662604,75663203,75668172,75668329,75670141,75670988,75672711,75676987,75676988,75677016,75677065,75677504,75678644,75678735,75680026,75681094,75683581,75685047,75685568,75685593,75688596,75688623,75688954,75692927,75693009,75693963,75694079,75694345,75696188,75696420,75696606,756…	7_75677504_C_T;	7_75694345_TC_T;		7_75696606_G_C;7_75696420_A_G;7_75696188_T_G;7_75677504_C_T;	7_75694345_TC_T;7_75694079_T_G;7_75693963_T_C;7_75693009_C_T;7_75692927_C_T;7_75688954_A_G;7_75688623_C_T;7_75688596_C_T;7_75685593_G_T;7_75685568_C_T;7_75685047_A_C;7_75683581_T_C;7_75681094_G_A;7_75680026_G_A;7_75678735_G_A;7_75678644_G_A;			0.31188118800000003	True	True	True	True	False	False	19.0	19.0	7_75734206	rs10085567	Schizophrenia	2.00E-07	Astle-W_eo-baso-sum_EUR_2017;Astle-W_eo-p-gran_EUR_2017;Astle-W_eo-p_EUR_2017;Astle-W_mpv_EUR_2017;Astle-W_neut-p-gran_EUR_2017;Astle-W_plt_EUR_2017;CKDGen_eGFRcrea-NDM_EUR_2016	0.180164	0.0	13	1.09e-18
ENSG00000146729	GBAS	O75323	O75323	7_56047572_C_T	rs60160896	0.018099808	0.000847468	1	5.7e-07	-0.371029991	5.61e-06	-0.462362484	2.18e-12	-0.405584726	1.17e-11	-0.401713875	True	202	19089468.57	0.189869553	11	0.141914456	False	56,047,572,560,356,800,000,000,000,000,000,000,000,000,000,000,000,000,000	7_56047572_C_T;				7_56066079_G_A;7_56057940_G_A;7_56044449_C_T;7_56043606_T_C;7_56035682_A_G;7_56047572_C_T;	7_56066079_G_A;7_56057940_G_A;7_56044449_C_T;7_56043606_T_C;7_56035682_A_G;7_56047572_C_T;		0.455445545	False	False	True	True	False	False	10.0	11.0								2	4.45e-07
ENSG00000146909	NOM1	Q5C9Z4	Q5C9Z4	7_156697502_T_C	rs141340339	0.085977786	0.006269947	1	6.55e-06	-0.618781597	0.006851006999999999	-0.437259359	1.376033441	-0.100281915	0.187750541	-0.13656427	False	202	7771039.103999997	0.171575069	22	0.180176306	False	156697502								0.094059406	False	False	False	False	False	False	12.0	16.0								0
ENSG00000147471	PROSC	O94903	O94903	8_37635649_A_G	rs7463174	0.022302986	0.001101704	1	6.11e-06	0.340527266	0.000467209	0.320769298	4.18e-16	0.61986881	2.82e-18	0.753112612	True	202	12729118.07	0.131960456	11	0.136589754	False	37635649				8_37635649_A_G;				0.205445545	True	False	False	False	False	False	11.0	11.0								4	1.74e-12
ENSG00000147853	AK3	Q9UIJ7	Q9UIJ7	9_4740251_A_C	rs12348423	0.000560872	1.34e-05	1	5.6e-12	0.7899568570000001	2.05e-06	0.601451934	4.56e-05	0.396473278	3.26e-05	0.361858429	True	202	18765015.59	0.237084804	16	0.133080423	False	4740251					9_4740251_A_C;			0.195544554	False	False	False	True	False	False	15.0	16.0								3	4.75e-12
ENSG00000148019	CEP78	A8MST6	A8MST6	9_80852222_A_G	rs17725778	0.028265971	0.0014988279999999998	1	6.34e-06	0.354852319	0.00017769900000000002	0.4732259070000001	0.20335672	0.130988537	0.002011526	0.137903652	True	202	3554190.114	0.167216911	15	0.182349278	False	808,522,228,083,771,000,000,000,000,000,000,000,000,000,000,000,000,000,000,000,000,000,000,000,000,000,000,000,000,000,000,000,000,000,000,000,000,000,000,000,000,000,000,000,000,000,000,000,000,000,000,000,000,000,000,000,000,000,000,000,000,000,000,000		9_80879999_AC_A;	9_80851527_G_A;	9_80889799_A_G;	9_80883601_T_C;9_80879999_AC_A;9_80877777_C_T;9_80867591_A_G;9_80866650_T_C;9_80858735_C_A;9_80857346_C_T;9_80856909_A_G;9_80856455_T_G;9_80854608_G_A;9_80853634_A_T;9_80851527_G_A;9_80852222_A_G;		9_80851350_G_C;	0.445544554	True	True	False	True	True	True	14.0	15.0								3	3.39e-10
ENSG00000148290	SURF1	Q15526	Q15526	9_136291063_C_T	rs3118667	3.3100000000000005e-05	5.47e-07	1	2.13e-11	-0.616838487	9.59e-08	-0.5996167960000001	1.59e-19	-0.869875477	4.76e-22	-0.8553981820000001	True	202	1704136.824	0.216422938	4	0.152498404	True	136291063								0.492574257	False	False	False	False	False	False	4.0	4.0					Astle-W_hct_EUR_2017;Astle-W_hgb_EUR_2017;Astle-W_lymph-p_EUR_2017;Astle-W_mchc_EUR_2017;Astle-W_rbc_EUR_2017	0.011502021	6.45999999999999e-164	40	5.75e-36
ENSG00000148296	SURF6	O75683	O75683	9_136195374_A_G	rs10751505	0.003612321	0.000117972	1	2.05e-08	-0.499083914	0.0001827	-0.378423348	2.57e-07	-0.162228483	0.046794558	-0.146007221	True	202	10479012.59	0.140087829	10	0.10884571	False	136,195,374,136,195,000,000,000,000,000,000,000,000,000,000,000,000,000,000,000,000,000,000,000	9_136199503_G_A;9_136199466_G_A;							0.361386139	False	False	True	False	False	False	8.0	8.0								19	9.52e-21
ENSG00000148484	RSU1	Q15404	Q15404	10_16859618_G_C		0.000490861	1.15e-05	1	1.11e-07	0.332802812	0.000122557	0.31690928100000004	1.7999999999999995e-41	0.82923286	1.4800000000000002e-05	0.304917924	True	202	13443118.2	0.156670445	13	0.126227835	False	1,685,961,816,848,470,000,000,000,000,000,000,000,000,000,000,000,000,000,000,000,000,000,000,000,000,000,000,000,000,000,000,000,000,000,000,000,000		10_16856835_G_GTTC;10_16856684_GA_G;			10_16857183_T_C;10_16857133_C_G;10_16856835_G_GTTC;10_16856685_A_G;10_16856684_GA_G;10_16853252_C_T;10_16853076_A_G;10_16848473_T_C;			0.492574257	False	True	False	True	False	False	11.0	13.0	10_16874565	rs1797081	Platelet distribution width	6.00E-17				27	6.6e-33
ENSG00000148690	FRA10AC1	Q70Z53	Q70Z53	10_95447477_C_G		0.000100995	1.87e-06	1	1.26e-09	-0.434556365	1.6800000000000002e-05	-0.540811385	2.79e-06	-0.34874125799999994	0.00031423700000000003	-0.222632601	True	202	2489518.232	0.17816016	8	0.16657076699999998	False	95447477,95422045,95422079,95422245,95427281,95428388,95429757,95430878,95431509,95435201,95435898,95437088,95437132,95439125,95439373,95439700,95439916,95442708,95442876,95443113,95443688,95444089,95444931,95445299,95445494,95445638,95447683,95447785,95449496,95452132,95453026,95453187,95454449,95454681,95454768,95456030,95456155,95456171,95457334,95458141,95458332,95458532,95458897,95459403,954…	10_95454681_G_C;	10_95458332_AT_A;10_95454768_TA_T;10_95447683_TCACA_T;10_95445299_CA_C;10_95443113_CT_C;10_95442708_T_TG;		10_95428388_A_G;	10_95460653_T_A;10_95459698_G_C;10_95459403_T_C;10_95458897_G_A;10_95458532_A_G;10_95458332_AT_A;10_95457334_A_G;10_95456171_T_C;10_95456155_C_A;10_95456030_C_T;10_95454768_TA_T;10_95454449_C_T;10_95453187_T_C;10_95453026_T_G;10_95452132_T_C;10_95449496_A_C;10_95447785_G_A;10_95447683_TCACA_T;10_95445638_A_C;10_95445494_C_A;10_95445299_CA_C;10_95444931_T_G;10_95444089_T_G;10_95443688_C_G;10_95443…		10_95458141_A_G;	0.467821782	True	True	True	True	False	True	7.0	8.0								39	6.2399999999999985e-31
ENSG00000148773	MKI67	P46013-2	P46013-2	10_129894391_A_G		3.52e-05	2.92e-07	2	6.769999999999999e-10	-1.404291509	3.41e-17	-1.368589447	0.13796407	-0.282886512	0.048455151	0.108894576	False	68	540881.9676	0.398030128	1	0.137000396	False	129,894,391,129,895,000,000,000,000,000,000,000,000,000,000,000,000,000,000,000,000,000,000,000,000,000,000,000,000,000,000,000,000,000,000,000	10_129911856_C_G;10_129907544_G_C;10_129904477_C_T;10_129902158_C_T;10_129901946_T_G;10_129901825_T_C;10_129901726_C_T;10_129901393_T_C;			10_129895452_G_C;			10_129906468_C_T;10_129901722_G_A;	0.180693069	True	False	True	False	False	True	1.0	1.0								0
ENSG00000148834	GSTO1	P78417	P78417	10_106027059_G_A		4.51e-07	1.41e-09	3	1.32e-14	-1.4049327130000002	5.68e-10	-1.205787394	0.35968737799999995	-0.394627838	0.134009927	0.190102735	False	202	19121263.12	0.294508496	11	0.236192429	False	###############################################################################################################################################################################################################################################################	10_106022829_AGAG_A;10_106027059_G_A;	10_106022829_AGAG_A;			10_106025390_T_C;10_106025030_A_T;10_106022829_AGAG_A;			0.04950495	False	True	True	True	False	False	8.0	8.0								0
ENSG00000149089	APIP	Q96GX9	Q96GX9	11_34905987_T_C	rs55672020	3.4500000000000005e-10	1.1e-12	1	2.94e-17	-0.814930802	2.63e-21	-0.8980361609999999	6.24e-40	-1.341605877	0.065244549	0.121957645	True	202	8550534.855	0.21422799	12	0.136017845	False	34905987,34859150,34859996,34860199,34860583,34860858,34861897,34863660,34863718,34864506,34865017,34865133,34865421,34865504,34865647,34866220,34868267,34869181,34869267,34869328,34869548,34870111,34870234,34872236,34872292,34872548,34872901,34874295,34874360,34874815,34874906,34875949,34876176,34876507,34876562,34878809,34879542,34885522,34890657,34892271,34893286,34896165,34897445,34899012,348…	11_34916657_C_T;	11_34918540_CACA_C;11_34907616_CTCCT_C;11_34907615_ACTC_A;11_34906626_CTATAA_C;11_34899168_TAG_T;	11_34916657_C_T;	11_34876562_C_T;11_34876507_C_G;11_34876176_C_T;11_34875949_G_C;11_34874906_T_G;11_34874815_G_A;	11_34936820_C_A;11_34935433_C_T;11_34935239_T_C;11_34934321_G_A;11_34933536_C_T;11_34932469_A_C;11_34931349_A_T;11_34927422_G_T;11_34926338_C_T;11_34923321_T_C;11_34918570_G_A;11_34918540_CACA_C;11_34917272_C_T;11_34916367_T_C;11_34911870_C_T;11_34911691_C_T;11_34907616_CTCCT_C;11_34907615_ACTC_A;11_34906626_CTATAA_C;11_34899168_TAG_T;11_34899070_C_T;11_34899012_T_C;11_34897445_T_C;11_34896165_G_…	11_34911870_C_T;11_34911691_C_T;11_34907616_CTCCT_C;11_34907615_ACTC_A;11_34906626_CTATAA_C;11_34899168_TAG_T;11_34899070_C_T;11_34899012_T_C;11_34897445_T_C;11_34896165_G_A;11_34893286_A_G;11_34892271_A_G;11_34890657_A_G;11_34885522_G_A;11_34879542_T_C;11_34878809_A_G;11_34876562_C_T;11_34876507_C_G;11_34876176_C_T;11_34875949_G_C;11_34874906_T_G;11_34874815_G_A;11_34905987_T_C;		0.274752475	True	True	True	True	True	False	10.0	13.0								46	2.129999999999998e-90
ENSG00000149311	ATM	Q13315	Q13315	11_108169619_C_T	rs619972	0.017885753	0.0008353519999999999	1	5.5e-07	-0.465990403	1.18e-09	-0.798879583	9.87e-05	-0.267990324	1.43e-10	-0.28533673800000003	True	202	21575274.92	0.186884152	65	0.168127148	True	108169619,108019887,108021205,108021226,108022061,108022234,108023284,108024336,108025214,108027060,108029109,108031294,108033955,108034124,108040104,108041897,108043988,108045956,108048446,108048541,108051112,108051300,108052191,108053887,108054500,108054604,108054922,108056708,108057430,108057856,108059000,108059569,108061808,108064935,108065708,108066130,108066362,108067234,108069239,108075161…		11_108204945_GT_G;11_108196712_CATT_C;11_108185181_AT_A;11_108183413_ACT_A;11_108170042_CT_C;11_108170039_TCTC_T;11_108166958_TC_T;11_108165406_GC_G;11_108165406_GC_G;11_108156048_CT_C;11_108121410_CTT_CTTT;11_108111429_TA_T;11_108107261_T_TA;		11_108239628_G_T;11_108237839_C_T;11_108236783_G_T;11_108093833_G_A;	11_108233800_C_A;11_108227965_G_A;11_108226855_A_T;11_108226025_A_G;11_108225661_A_G;11_108225483_C_T;11_108223391_T_C;11_108222801_C_A;11_108221665_C_G;11_108221483_G_C;11_108221482_AG_GC;11_108221482_A_G;11_108221482_AG_GC;11_108221099_A_C;11_108219420_G_A;11_108219339_C_A;11_108218905_T_C;11_108218196_T_C;11_108217049_T_G;11_108215095_A_G;11_108212692_G_C;11_108212093_A_C;11_108211412_T_G;11_1…	11_108186258_G_A;11_108185478_C_T;11_108185181_AT_A;11_108185023_G_A;11_108184841_A_G;11_108184594_G_A;11_108183413_ACT_A;11_108182069_G_A;11_108181511_A_C;11_108177538_C_T;11_108174191_C_T;11_108174173_G_A;		0.445544554	True	True	False	True	False	False	60.0	65.0	11_108131646;11_108140909;11_108165407;11_108165407;11_108165407;11_108279201;11_108283161;11_108337137	rs594153;rs637064;rs582297;rs582297;rs582297;rs4237579;rs11212617;rs7943607	Red blood cell count;Eosinophil counts;Eosinophil counts;Eosinophil percentage of white cells;Sum eosinophil basophil counts;Mean corpuscular volume;Response to metformin in type 2 diabetes (glycemic);Mean corpuscular hemoglobin		Astle-W_eo-baso-sum_EUR_2017;Astle-W_neut-p-gran_EUR_2017	0.237711544	1.9999999999999996e-106	9	2.06e-16
ENSG00000149428	HYOU1	Q9Y4L1	Q9Y4L1	11_118904233_G_T	rs583893	0.008641250999999999	0.000174484	2	4.14e-08	-0.414463229	0.002856062	-0.346056599	0.041755675	-0.121003523	0.03139578	-0.08927476599999999	False	202	167428044.9	0.108461907	48	0.098369606	False	118,904,233,118,911,000,000,000,000,000,000,000,000,000,000,000,000,000,000,000,000,000,000,000,000,000,000,000,000,000					11_118919132_G_A;	11_118919132_G_A;		0.440594059	False	False	False	True	False	False	37.0	48.0								0
ENSG00000149547	EI24	O14681	O14681	11_125459951_A_C	rs562599	0.004153307	0.000138557	1	1.19e-07	-0.777390658	9.88e-06	-0.639867189	0.002963803	-0.669567111	0.139481598	-0.175422191	True	194	2984120.747	0.184210943	3	0.127302878	False	125459951,125326058,125326615,125332704,125342130,125344535,125383808,125401154,125415936,125425606,125425951,125435724,125439423,125455864,125461034,125461709,125461787,125461788,125464841,125467144,125470524,125474766,125486848,125489621,125512619,125518006,125518245,125518345,125528569,125532369,125534115,125550049,125557208,125570941				11_125439423_T_C;				0.101485149	True	False	False	False	False	False	3.0	3.0	11_125342130;11_125344535;11_125415936;11_125461034;11_125461709;11_125461709	rs669052;rs2845847;rs2849225;rs1293672;rs548181;rs548181	Lung function (FVC);Heel bone mineral density;Heel bone mineral density;Heel bone mineral density;Autism spectrum disorder, attention deficit-hyperactivity disorder, bipolar disorder, major depressive disorder, and schizophrenia (combined);Schizophrenia					0
ENSG00000149782	PLCB3	Q01970	Q01970	11_64103634_G_A	rs7107446	0.076958809	0.005360001	1	1.22e-05	-0.581000316	0.002930693	-0.645892008	0.395042978	-0.125795217	0.202511645	-0.086653003	False	202	52759051.69	0.08982512	50	0.111077778	True	64,103,634,640,262,100,000,000,000,000,000,000,000,000,000,000,000,000,000,000,000,000,000,000,000,000,000,000,000,000,000,000,000,000,000,000,000,000,000,000,000,000,000					11_64026219_C_T;			0.131188119	False	False	False	True	False	False	40.0	49.0								0
ENSG00000150456	N6AMT2	Q8WVE0	Q8WVE0	13_21309216_C_G	rs57027275	0.000246732	5.26e-06	1	7.5e-09	-0.770554416	2.09e-11	-0.965937201	5.99e-06	-0.647419379	3.12e-07	-0.502221322	True	167	403886.5861	0.28608679800000003	2	0.274109888	False	21309216,21290644,21296416,21297475,21301062,21301105,21301407,21304372,21304582,21304584,21304731,21304962,21305345,21305575,21306618,21307052,21307989,21309266,21310298,21311102,21311977,21312766,21313507,21314252,21314506,21314582,21316495,21316845,21317052,21317146,21318840,21319487,21320243,21320824,21321254,21323115,21323285,21327312,21327434,21328445,21328500,21329029,21333747,21334741,213…		13_21343596_ACTTTT_A;13_21333747_CAA_C;13_21333745_AAC_A;13_21320824_G_GT;13_21320243_CAT_C;13_21317146_TTTGAG_T;			13_21343596_ACTTTT_A;13_21338850_C_T;13_21338827_G_A;13_21338769_G_A;13_21338737_G_T;13_21338133_T_C;13_21338026_T_C;13_21337705_C_T;13_21337630_C_T;13_21337550_C_T;13_21336948_C_T;13_21334741_A_T;13_21333747_C_A;13_21333747_CAA_C;13_21333745_AAC_A;13_21329029_G_A;13_21328500_A_C;13_21328445_C_A;13_21327434_G_A;13_21327312_C_T;13_21323285_C_T;13_21323115_C_T;13_21321254_C_T;13_21320824_G_GT;13_21…			0.108910891	False	True	False	True	False	False	2.0	2.0								1	1.36e-05
ENSG00000150768	DLAT	P10515	P10515	11_111981853_T_C	rs11214086	0.003429562	0.000108391	1	2.18e-07	-0.400463075	7.670000000000001e-05	-0.401087012	2.09e-05	-0.306251765	3.61e-09	-0.424615127	True	202	52464940.19	0.118894667	21	0.099841696	False	111981853,111808876,111809489,111814258,111814931,111816143,111817682,111817914,111820482,111825253,111826511,111831318,111833209,111845933,111846715,111848531,111853865,111856412,111857217,111861156,111861190,111866015,111866442,111869550,111873931,111875773,111876817,111877844,111878217,111889635,111892059,111892246,111892515,111892527,111893843,111894859,111895253,111895254,111896324,111897658…	11_111916647_G_A;11_111908162_T_C;11_111896324_C_T;	11_111927363_AT_A;11_111901115_C_CA;		11_111934507_G_C;11_111933678_A_G;	11_111933088_A_G;11_111930576_C_T;11_111927363_AT_A;11_111926528_T_C;11_111926072_G_C;11_111921108_C_T;11_111920741_A_G;11_111916342_A_G;11_111914566_A_G;11_111913364_G_A;11_111912083_A_G;11_111909819_C_A;11_111908162_T_C;11_111905468_A_G;11_111904526_T_C;11_111903995_T_C;11_111902202_A_G;11_111901115_C_CA;11_111901115_C_T;11_111897941_C_T;11_111897741_C_T;11_111897658_A_G;			0.373762376	True	True	True	True	False	False	20.0	21.0					GIANT_WHR-Active_EUR_2017	0.001979306		3	2.3e-15
ENSG00000150776	C11orf57	E9PQL5	E9PQL5	11_112189460_C_T	rs58990523	0.030030261000000006	0.0016240170000000002	1	1.77e-05	-0.715798088			0.132309025	-0.136263842	0.007598540999999999	0.235798415	False	62	488574.4582	0.204044017	1	0.376009452	False	112189460								0.076732673	False	False	False	False	False	False	0.0	0.0								0
ENSG00000151065	DCP1B	Q8IZD4	Q8IZD4	12_2113348_A_C	rs7298333	0.016859673999999998	0.000779535	1	8.28e-07	0.479164764	1.55e-06	0.852861297	2.92e-12	0.5770499960000001	1.1399999999999998e-16	0.701003362	True	202	6142700.3939999975	0.253363693	17	0.222915947	False	2,113,348,209,125,720,000,000,000,000,000,000,000,000,000,000,000					12_2091257_C_T;12_2113348_A_C;	12_2091257_C_T;12_2113348_A_C;		0.465346535	False	False	False	True	False	False	14.0	17.0								1	8.690000000000002e-07
ENSG00000151176	PLBD2	Q8NHP8	Q8NHP8	12_113828356_C_G	rs112788546	0.047023137	0.002735631	1	5.6e-06	-0.640546	1.58e-05	-0.780601552	1.84e-08	-0.494194431	1.96e-11	-0.6146227439999999	True	202	17918297.03	0.162787142	17	0.15045352	False	113,828,356,113,807,000					12_113807039_G_A;	12_113807039_G_A;		0.081683168	False	False	False	True	False	False	14.0	14.0								3	7.94e-21
ENSG00000151364	KCTD14	Q9BQ13-2	Q9BQ13-2	11_77751377_T_C	rs12807592	0.0029061620000000003	8.840000000000001e-05	1	4.24e-07	-0.393267623	0.002693813	-0.349485386	0.00841136	-0.147234122	0.023265372000000003	-0.127294774	True	202	3285845.588	0.203415571	7	0.452166696	False	7,775,137,777,750,410,000,000,000,000,000,000,000,000,000,000,000,000,000,000,000,000,000,000,000,000,000,000,000,000,000,000,000,000,000,000,000,000,000,000,000,000,000,000,000,000,000,000,000,000,000,000,000,000		11_77751724_T_TA;11_77750416_AT_A;			11_77755345_A_C;11_77754965_G_C;11_77751995_T_C;11_77751724_T_TA;11_77750417_T_A;11_77750416_AT_A;11_77751377_T_C;			0.193069307	False	True	False	True	False	False	6.0	7.0								1	9.48e-10
ENSG00000151413	NUBPL	Q8TB37	Q8TB37	14_32353250_T_C	rs2039485	0.049118661	0.002915037	1	1.25e-05	-0.455754873	0.014577445	-0.360024618	0.164852219	-0.217430553	0.006793763	-0.271622044	True	202	3262221.863	0.16493513	6	0.124011161	False	323,532,503,233,545,000,000,000,000,000,000,000,000,000,000,000,000,000,000,000,000,000,000,000,000,000,000,000,000,000,000,000,000,000,000,000,000,000,000,000,000,000,000,000,000,000,000,000								0.217821782	False	False	False	False	False	False	6.0	6.0	14_32353250	rs2039485	Brain lesion load	6.00E-06				3	1.2e-12
ENSG00000151552	QDPR	P09417	P09417	4_17517242_C_T	rs28382333	1.82e-12	2.9899999999999997e-15	1	1.07e-16	-0.8390461309999999	2.6600000000000003e-16	-0.777989127	0.0007391889999999999	-0.313538769	9.62e-26	-0.99718384	True	202	17786341.28	0.178423345	12	0.128547186	False	17,517,242,175,113,400,000,000,000,000,000,000,000,000,000,000,000,000,000,000,000,000,000,000,000,000,000,000,000,000,000,000,000,000,000,000,000,000,000,000,000,000,000	4_17511595_A_T;				4_17511949_G_T;4_17511810_C_T;4_17511634_G_A;4_17511595_A_T;4_17511347_G_A;	4_17511949_G_T;4_17511810_C_T;4_17511634_G_A;4_17511595_A_T;4_17511347_G_A;		0.21039604	False	False	True	True	False	False	11.0	12.0	4_17520066;4_17523907	rs28719835;rs28458311	Blood protein levels;Blood protein levels	1E-94;2E-23				25	9.969999999999999e-53
ENSG00000151576	QTRTD1	Q9H974	Q9H974	3_113694833_G_A	rs1487265	0.025153719	0.001289632	1	3.95e-06	0.44742313	0.139445238	0.331280859	2.25e-09	0.31697374	0.000325927	0.186487313	True	202	10369555.73	0.105029456	17	0.18744594	False	113694833,113680951,113690427,113694940,113694943,113696376,113714226,113714227,113716380,113719490,113726751,113730108,113731287,113736566,113744101,113749765,113762574,113776416,113778457,113784767,113785818,113786450,113793682,113795834,113797892,113801826,113801965,113807294,113809350		3_113797892_T_TTA;			3_113801965_T_C;3_113801826_C_T;3_113797892_T_TTA;3_113795834_G_A;3_113793682_G_A;3_113786450_A_G;3_113785818_T_G;3_113784767_T_G;3_113776416_T_A;3_113762574_G_C;3_113749765_A_G;3_113744101_C_T;3_113736566_C_T;3_113731287_G_T;3_113730108_C_T;3_113726751_C_T;			0.274752475	False	True	False	True	False	False	14.0	17.0	3_113680951	rs1386478	Crohn's disease and psoriasis	7.00E-06				0
ENSG00000151657	KIN	O60870	O60870	10_7865848_G_A		0.013069994	0.000567595	1	6e-06	0.509735819	0.024880861	0.408924395	0.045119279000000005	0.282740628	0.008142986	0.184456743	True	202	11678364.07	0.105569534	20	0.115296811	True	78,658,487,822,985,700,000,000,000,000,000,000					10_7822985_C_T;			0.173267327	False	False	False	True	False	False	18.0	20.0								8	4.2e-09
ENSG00000151718	WWC2	Q6AWC2-4	Q6AWC2-4	4_184250312_C_T	rs7694290	0.092441679	0.006849536	1	6.68e-06	0.43049068	0.003277603	0.407623188	0.06389610700000001	0.17056432800000002	0.008247528	0.119734767	True	202	8803005.489	0.120803609	21	0.10106464	False	184250312								0.341584158	False	False	False	False	False	False	17.0	21.0								0
ENSG00000151725	CENPU	Q71F23	Q71F23	4_185653826_G_A	rs6845294	2.65e-09	1.21e-11	1	5.510000000000001e-13	0.718026453	2.24e-11	0.7286225829999999	1.2099999999999998e-35	1.219251781	1.5e-38	1.111996125	True	202	4942014.0830000015	0.174785725	14	0.158750875	True	###############################################################################################################################################################################################################################################################					4_185652871_A_T;4_185652147_G_A;4_185649866_C_A;4_185639169_G_A;4_185638876_C_T;4_185638853_G_A;4_185637418_C_T;4_185636217_T_A;4_185635311_C_T;4_185629339_G_A;4_185626542_G_A;4_185625657_A_G;4_185625523_T_C;4_185624388_T_C;4_185622046_C_T;4_185620401_G_A;4_185620341_G_A;4_185620108_G_T;4_185653826_G_A;	4_185652871_A_T;4_185652147_G_A;4_185649866_C_A;4_185639169_G_A;4_185638876_C_T;4_185638853_G_A;4_185637418_C_T;4_185636217_T_A;4_185635311_C_T;4_185629339_G_A;4_185626542_G_A;4_185625657_A_G;4_185625523_T_C;4_185624388_T_C;4_185622046_C_T;4_185620401_G_A;4_185620341_G_A;4_185620108_G_T;4_185653826_G_A;		0.319306931	False	False	False	True	False	False	13.0	14.0	4_185639169	rs2130392	Kawasaki disease	3.00E-08				36	2.0799999999999995e-75
ENSG00000152256	PDK1	Q15118-2	Q15118-2	2_173338486_T_C	rs6714597	3.87e-06	2.42e-08	2	2.19e-11	0.687092038	1.16e-08	0.730477113	3.35e-07	0.549846567	2.25e-07	0.52670548	True	202	4152594.526	0.32613122	12	0.188949517	False	173,338,486,173,339,000,000,000,000,000,000,000,000,000,000,000,000,000,000,000,000,000,000,000,000,000,000								0.29950495	False	False	False	False	False	False	14.0	14.0	2_173339808	rs11895564	Eosinophil counts					1	5.93e-06
ENSG00000152778	IFIT5	Q13325	Q13325	10_91159323_G_T		0.000991924	2.52e-05	1	7.53e-08	-0.610155236	4.1e-06	-0.60301929	5.32e-20	-0.955251605	8.28e-25	-0.989445642	True	193	1618054.336	0.22294684	9	0.168296478	False	91,159,323,911,425,800,000,000,000,000,000,000,000,000,000,000,000,000,000,000,000,000,000,000,000,000,000								0.287128713	False	False	False	False	False	False	8.0	9.0								41	5.13e-55
ENSG00000152904	GGPS1	O95749	O95749	1_235516145_A_G	rs10925519	0.068645422	0.004668499	1	3.35e-05	-0.275988217	0.001104102	-0.441531253	3.41e-08	-0.480542412	0.0031162340000000003	-0.17931411100000005	True	202	5997990.025	0.15261148800000002	8	0.243965406	False	235516145								0.294554455	False	False	False	False	False	False	8.0	8.0								2	5.85e-06
ENSG00000153214	TMEM87B	Q96K49-2	Q96K49-2	2_112650572_A_G	rs12473435	0.091594664	0.006765332	1	4.15e-06	-0.504061058	0.036630099	-0.374497885	0.036337452	-0.287493127	0.03125505	-0.17355943399999998	False	202	1460592.579	0.179801102	4	0.221761814	False	112650572								0.17574257399999998	False	False	False	False	False	False	4.0	4.0								0
ENSG00000153406	NMRAL1	Q9HBL8	Q9HBL8	16_4519439_G_A	rs11557236	6.33e-06	8.59e-08	1	1.97e-12	-1.168727	8.28e-10	-1.057443336	0.171419448	-0.438263432	0.688614682	0.062965275	False	202	3552069.3	0.299444229	11	0.233621646	False	45,194,394,471,629	16_4519439_G_A;			16_4519439_G_A;	16_4519439_G_A;	16_4519439_G_A;		0.074257426	True	False	True	True	False	False	6.0	6.0	16_4519439	rs11557236	Blood protein levels	2.00E-28				0
ENSG00000153898	MCOLN2	Q8IZK6-2	Q8IZK6-2	1_85226042_T_C	rs1770567	0.095121234	0.0071594230000000016	1	2.33e-05	0.777766655			1.265058331	0.138748941	0.17256958100000006	0.144984213	False	95	304508.4188	0.422677446	1	0.644802071	False	85,226,042,852,223,100,000,000,000,000,000,000,000,000,000,000,000,000,000,000,000,000,000,000,000,000,000								0.235148515	False	False	False	False	False	False										0
ENSG00000153904	DDAH1	O94760	O94760	1_85890726_G_A	rs1523994	5.68e-06	7.59e-08	1	1.5800000000000002e-10	-0.419546481	5.75e-08	-0.453832509	0.000149326	-0.29550749600000004	6.82e-05	-0.300116796	True	202	19482023.93	0.214400717	16	0.143893291	False	85,890,726,858,809,700,000,000,000,000,000,000,000,000,000,000,000,000,000					1_85894932_T_A;1_85894027_G_A;1_85884101_T_C;1_85883320_C_G;1_85882905_A_G;1_85880976_T_C;1_85890726_G_A;			0.247524752	False	False	False	True	False	False	15.0	16.0								4	1.55e-12
ENSG00000154114	TBCEL	Q5QJ74	Q5QJ74	11_120968462_A_G	rs12274094	0.013899082	0.000610108	1	1.02e-06	-0.36159814	0.062908465	-0.635952654	0.061238823	-0.188501862	0.003441419	-0.249414016	True	202	2528906.105	0.132931007	15	0.174859084	False	120,968,462,120,887,000,000,000,000,000,000,000,000,000,000,000,000,000,000,000,000,000,000,000,000,000,000,000,000,000,000,000,000,000,000,000,000,000,000		11_120895264_GA_G;		11_120959225_A_G;	11_120954446_T_G;11_120950632_T_C;11_120950521_G_A;11_120940461_G_A;11_120937637_T_C;11_120935558_A_C;11_120914370_T_C;11_120911203_T_C;11_120895265_A_G;11_120895264_GA_G;	11_120959225_A_G;11_120954446_T_G;11_120950632_T_C;11_120950521_G_A;11_120940461_G_A;11_120937637_T_C;11_120935558_A_C;11_120914370_T_C;11_120911203_T_C;11_120895265_A_G;11_120895264_GA_G;		0.346534653	True	True	False	True	False	False	12.0	15.0								2	1.62e-07
ENSG00000154760	SLFN13	Q68D06	Q68D06	17_33766427_T_G	rs8064840	6.5e-07	6.5e-09	1	2.35e-13	-0.637738064	3.25e-11	-0.76906119	3.85e-16	-0.645681041	5.0500000000000005e-12	-0.548679213	True	202	6209268.244	0.33294337	18	0.277542324	False	337,664,273,376,724,000,000,000	17_33768354_C_T;	17_33767243_A_AAG;		17_33768354_C_T;17_33767243_A_AAG;17_33767243_A_G;17_33766427_T_G;		17_33768354_C_T;17_33767243_A_AAG;17_33767243_A_G;17_33766427_T_G;		0.467821782	True	True	True	False	False	False	17.0	17.0					Astle-W_ret-p_EUR_2017	3.9799999999999914e-263	0.0	6	4.7e-11
ENSG00000154767	XPC	Q01831	Q01831	3_14242148_T_C	rs2305843	0.009895141	0.000408871	1	1.8e-07	-0.6743984740000001	0.003623009	-0.4931098920000001	0.000867719	-0.430846692	0.000570169	-0.429631464	True	202	11757172.87	0.139950256	23	0.148025211	False	14242148								0.133663366	False	False	False	False	False	False	19.0	22.0								2	7.22e-06
ENSG00000154814	OXNAD1	C9JLB7	C9JLB7	3_16294425_A_G	rs6442592	0.003106672	9.56e-05	1	5.75e-08	-0.6873511609999999	3.38e-22	-1.761288841	0.636865437	-0.111342863	0.49147278	0.054245292	False	202	2652000.291	0.162329026	6	0.183338494	False	16294425,16290167,16290731,16290767,16296927,16297548,16297930,16301791,16301959,16303284,16303489,16303653,16307114,16307234,16309812,16310379,16313320,16313872,16313995,16314948,16318588,16318915,16319108,16319554,16319729,16321641,16325157,16325901,16326510,16327192,16327909,16330557,16335770,16336026,16347427,16349420,16350055,16352193,16352409,16352460,16352637,16352959,16352990,16353540,163…	3_16327909_C_T;	3_16359338_AATG_A;3_16359277_GC_G;3_16354529_GTTTA_G;3_16352637_ACTCC_A;3_16350055_CTTA_C;3_16347427_GA_G;3_16325901_TAAAC_T;		3_16347427_GA_G;	3_16364954_C_T;3_16364846_C_T;3_16361108_C_A;3_16361063_C_G;3_16360800_A_G;3_16360674_G_A;3_16359993_G_A;3_16359825_C_T;3_16359690_T_C;3_16359528_C_T;3_16359338_AATG_A;3_16359277_GC_G;3_16359236_C_T;3_16358902_A_G;3_16357494_G_A;3_16355778_A_G;3_16355715_C_T;3_16355689_T_A;3_16355148_A_G;3_16354529_GTTTA_G;3_16354467_G_A;3_16353540_G_T;3_16352990_G_A;3_16352959_A_T;3_16352637_ACTCC_A;3_16352460_G…			0.160891089	True	True	True	True	False	False	6.0	6.0								3	2.49e-09
ENSG00000155034	FBXL18	Q96ME1-4	Q96ME1-4	7_5516940_C_T	rs7808325	0.0052023270000000005	0.000185732	1	5.51e-07	0.411903156	0.003337961	0.462956063	0.007769613000000002	0.16818904899999998	0.8944649990000001	-0.0077513259999999985	True	202	9434272.102	0.109568237	25	0.095208792	False	55,169,405,513,067,500,000,000,000,000,000,000,000,000,000,000,000,000,000,000,000,000,000,000,000,000,000,000,000,000,000,000,000,000,000,000,000,000,000,000,000,000,000,000,000,000,000	7_5529758_G_A;	7_5513941_GT_G;		7_5520929_T_C;	7_5529922_A_C;7_5529758_G_A;7_5527714_G_C;7_5527501_G_A;7_5527211_C_T;7_5526712_G_A;7_5526439_C_G;7_5525263_G_C;7_5524950_G_A;7_5524805_G_A;7_5523494_G_C;7_5521868_C_T;7_5520929_T_C;7_5519031_C_G;7_5518333_A_T;7_5516797_C_G;7_5513941_GT_G;7_5513672_C_T;7_5516940_C_T;	7_5529922_A_C;7_5529758_G_A;7_5527714_G_C;7_5527501_G_A;7_5527211_C_T;7_5526712_G_A;7_5526439_C_G;7_5525263_G_C;7_5524950_G_A;7_5524805_G_A;7_5523494_G_C;7_5521868_C_T;7_5520929_T_C;7_5519031_C_G;7_5518333_A_T;7_5516797_C_G;7_5513941_GT_G;7_5513672_C_T;7_5516940_C_T;		0.435643564	True	True	True	True	False	False	25.0	25.0								3	4.6e-12
ENSG00000155363	MOV10	Q9HCE1	Q9HCE1	1_113169667_T_G	rs12130243	0.075211851	0.005211918	1	1.09e-05	-0.55019471	0.000196993	-0.560362154	4.36e-16	-0.752828398	8.590000000000002e-21	-0.8279011159999999	True	202	35164851.19	0.145975913	44	0.100380891	True	113169667,113060432,113062694,113063771,113068577,113076819,113081783,113082153,113082298,113085452,113092906,113095711,113097633,113102398,113104501,113106633,113108464,113115944,113117213,113119442,113120593,113123360,113124239,113127430,113127954,113128212,113128931,113137570,113140583,113141218,113144439,113145634,113147607,113154364,113157181,113160170,113160419,113170389,113173804,113181720…				1_113231286_T_C;	1_113242122_T_G;1_113240790_G_T;1_113240106_A_T;1_113238593_G_A;1_113236534_A_T;1_113234886_T_C;1_113234179_C_T;1_113233698_T_C;1_113231286_T_C;1_113223233_G_A;		1_113243048_C_T;1_113241052_T_C;1_113239382_G_A;1_113237171_A_G;1_113236681_C_T;	0.188118812	True	False	False	True	False	True	42.0	44.0	1_113128212;1_113181739;1_113190807;1_113190807;1_113190807;1_113190807;1_113202571;1_113236681	rs12045227;rs61818802;rs17030613;rs17030613;rs17030613;rs17030613;rs12120956;rs3748656	Intraocular pressure;Intraocular pressure;Blood pressure;Diastolic blood pressure;Intraocular pressure;Total cholesterol levels;Height;Hip circumference adjusted for BMI		GIANT_Waist-adjusted-PA-F_Mixed_2017;GIANT_Waist-adjusted-PA-M_Mixed_2017	3.72e-23	0.0	12	1.57e-11
ENSG00000155393	HEATR3	Q7Z4Q2	Q7Z4Q2	16_50106594_T_C	rs2287197	4.1e-13	5.76e-16	1	1.8299999999999999e-25	-1.112375157	4.89e-18	-1.017349539	0.000107097	-0.338569479	0.012604341000000002	-0.230252105	True	202	11803246.02	0.145606489	22	0.08323726	False	50106594,50034680,50041983,50042362,50043558,50047296,50052216,50056554,50058219,50062572,50068422,50068445,50069312,50075276,50075548,50075993,50079250,50079253,50079390,50088342,50088999,50092291,50093238,50094204,50097444,50098887,50099747,50099777,50100253,50101015,50101526,50107635,50108102,50108251,50108615,50108892,50109100,50109478,50109928,50110084,50110650,50111074,50112267,50113773,501…		16_50126657_G_GTCAT;16_50123310_TGA_T;16_50123309_CTG_C;16_50120866_ACT_A;16_50110650_AC_A;16_50101526_TAACTC_T;	16_50120122_C_T;16_50109478_G_A;		16_50138100_A_C;16_50130045_G_A;16_50128872_T_C;16_50127120_G_C;16_50126691_A_C;16_50126657_G_GTCAT;16_50125856_A_G;16_50125145_A_T;16_50123310_TGA_T;16_50123310_T_A;16_50123309_CTG_C;16_50122946_T_C;16_50121773_C_G;16_50120983_G_C;16_50120869_A_T;16_50120867_C_A;16_50120866_ACT_A;16_50120668_G_C;16_50120122_C_T;16_50119170_T_C;16_50118245_G_A;16_50117316_G_A;16_50116999_C_T;16_50116819_G_A;16_50…		16_50106594_T_C;	0.245049505	False	True	False	True	True	True	21.0	22.0	16_50093238;16_50106594;16_50128872;16_50128872	rs12599260;rs2287197;rs10852606;rs10852606	Mean corpuscular hemoglobin;Red cell distribution width;Glioblastoma;Glioma		Astle-W_mch_EUR_2017;Astle-W_mcv_EUR_2017;Astle-W_rdw_EUR_2017;IBDGC_Chrons-Disease_EUR_2015	0.9756935	0.0224155	48	4.5099999999999956e-82
ENSG00000155542	SETD9	Q8NE22	Q8NE22	5_56247528_G_T	rs77112307	8.88e-06	1.26e-07	1	9.939999999999998e-12	-0.959138898	7.51e-14	-1.43782021	1.24e-31	-1.2750254090000002	2.07e-38	-1.416149043	True	176	689182.0121	0.230944375	6	0.15827532800000002	False	562,475,285,619,490,000,000,000,000,000,000,000,000,000,000,000								0.15594059400000002	False	False	False	False	False	False	6.0	6.0								48	1.6099999999999984e-107
ENSG00000155906	RMND1	Q9NWS8	Q9NWS8	6_151745522_C_T		0.055304379	0.003456928	1	2.53e-06	-0.370034954	4.31e-08	-0.591384216	7.88e-14	-0.615176517	6.270000000000001e-15	-0.732743805	True	202	3270032.437	0.28889552	11	0.189013019	False	151,745,522,151,755,000,000,000,000,000,000,000,000,000,000		6_151755004_CTG_C;			6_151761621_A_G;6_151760382_C_T;6_151759630_T_C;6_151755004_CTG_C;6_151745522_C_T;			0.26980198	False	True	False	True	False	False	11.0	11.0								15	5.09e-24
ENSG00000156052	GNAQ	P50148	P50148	9_80509163_T_G	rs35198293	0.005837064	0.000215388	1	2.63e-07	-0.434819658	0.004065194	-0.4068953320000001	5.13e-07	-0.351438848	2.37e-12	-0.444765187	True	202	12697951.26	0.132017003	16	0.08230659900000001	True	80509163		9_80509163_T_TG;			9_80509163_T_TG;9_80509163_T_A;			0.21039604	False	True	False	True	False	False	15.0	16.0								0
ENSG00000156398	SFXN2	Q96NB2	Q96NB2	10_104523018_C_T		3.4500000000000005e-10	1.13e-12	1	2.7999999999999997e-18	-1.043811992	1.53e-14	-1.262984403	1.07e-13	-0.90337283	6.63e-21	-1.01647262	True	202	2026597.467	0.280060368	8	0.250151607	False	104,523,018,104,487,000,000,000,000,000,000,000,000,000,000,000,000,000,000,000,000,000,000,000,000,000,000				10_104503174_T_C;10_104500988_T_G;	10_104487973_T_C;	10_104487973_T_C;		0.180693069	True	False	False	True	False	False	8.0	8.0					Astle-W_baso-neut-sum_EUR_2017;Astle-W_gran_EUR_2017;Astle-W_mch_EUR_2017;Astle-W_mcv_EUR_2017;Astle-W_myeloid-wbc_EUR_2017;Astle-W_neut-eo-sum_EUR_2017;Astle-W_ret-p_EUR_2017;Astle-W_wbc_EUR_2017;CARDIoGRAMplusC4D_CHD_Mixed_2015;CARDIoGRAMplusC4D_MI_Mixed_2015;van-der-Harst-P_CAD_Mixed_2018	1.2e-06	1.83e-37	21	4.18e-22
ENSG00000156968	MPV17L	Q2QL34	Q2QL34	16_15401640_C_T	rs191094017	0.02437561	0.001244701	1	4.19e-06	-0.82323386	0.001247473	-0.7269484159999999	0.022509566	-0.195079835	0.8095143929999999	0.013031228999999998	False	73	373818.45700000005	0.372374167	2	0.522504148	False	15401640								0.445544554	False	False	False	False	False	False	2.0	2.0								0
ENSG00000157184	CPT2	P23786	P23786	1_53695882_T_C	rs13375749	3.87e-06	4.85e-08	1	8.099999999999999e-11	-0.677833056	0.000178729	-0.79252181	0.251985135	-0.108666269	0.082271435	-0.128238295	False	202	22915205.83	0.130423487	28	0.091575974	False	536,958,825,366,282,000,000,000,000,000,000,000,000,000,000,000	1_53679229_A_G;				1_53674542_G_A;1_53672028_A_G;1_53662823_C_A;			0.190594059	False	False	True	True	False	False	26.0	27.0	1_53695882	rs13375749	Blood metabolite levels					4	5.53e-06
ENSG00000157326	DHRS4	Q9BTZ2	Q9BTZ2	14_24403219_C_A	rs73598764	8.72e-10	3.27e-12	1	1.4199999999999995e-17	-1.328977818	5.46e-14	-1.20272273	1.93e-13	-0.983919877	4.19e-14	-0.920561455	True	202	5825441.706	0.205202108	4	0.230222261	False	2,440,321,924,405,780,000,000,000,000,000,000,000,000,000,000,000,000,000,000,000,000							14_24423090_A_G;	0.121287129	False	False	False	False	False	True	5.0	5.0								15	1.82e-21
ENSG00000157379	DHRS1	Q96LJ7	Q96LJ7	14_24747931_A_G	rs55841854	1.13e-08	7.15e-11	1	4.99e-17	-1.6712141	4.09e-11	-1.562832019	1.6000000000000002e-20	-1.7543271230000002	9.22e-21	-1.727105258	True	202	4711576.84	0.187115682	10	0.092292287	False	247,479,312,474,952,000,000,000,000,000,000,000,000,000,000,000	14_24760764_G_A;		14_24760764_G_A;	14_24760764_G_A;		14_24760764_G_A;		0.069306931	True	False	True	False	True	False	7.0	7.0								29	1.9399999999999996e-60
ENSG00000158623	COPG2	Q9UBF2	Q9UBF2	7_130143420_T_C	rs1008633	0.052453758	0.003211204	1	4.26e-06	0.459728875	0.0006051219999999999	0.451609454	1.190179092	0.07813827400000001	7.849999999999999e-11	0.5045330610000001	True	202	19513483.23	0.100453475	11	0.102943509	False	130,143,420,130,125,000,000,000,000								0.198019802	False	False	False	False	False	False	9.0	11.0								27	4.4299999999999985e-57
ENSG00000158825	CDA	P32320	P32320	1_20928284_C_T	rs4655226	0.002566201	7.69e-05	1	3.01e-08	-0.962925125	1e-05	-0.976889468	0.08944500000000001	0.300512388	0.047535792	0.353955026	False	202	596201.012	0.522455207	3	0.185087384	False	20928284,20924330,20924455,20926051,20927013,20927176,20927657,20930228,20933592,20934563,20935986,20936645,20937636,20938905,20941516,20948537,20957053,20958024,20960928,20961551,20962149,20962402,20964328,20965375,20966880,20968011,20970344,20972048,20972914,20976512,20976589,20976759,20977221,20977365,20978832,20979818,20980922,20984485		1_20938905_TC_T;1_20934563_AG_A;			1_20941516_G_T;1_20938905_TC_T;1_20937636_G_C;1_20936645_G_A;1_20935986_A_T;1_20934563_AG_A;1_20933592_G_A;1_20930228_A_G;1_20927657_C_A;1_20927176_G_A;1_20927013_C_A;1_20926051_A_G;1_20924455_G_C;1_20924330_A_G;1_20928284_C_T;			0.084158416	False	True	False	True	False	False	2.0	2.0								3	2.6399999999999998e-31
ENSG00000159335	PTMS	P20962	P20962	12_6877721_C_T	rs17887160	0.0046395590000000006	0.000162382	1	1.72e-06	0.279090141	9.28e-05	0.266597905	0.00021373	0.307863532	4.37e-06	0.309708121	True	202	93304425.22	0.28253844100000003	3	0.266725944	False	68,777,216,876,288					12_6876288_G_C;12_6877721_C_T;			0.252475248	False	False	False	True	False	False	3.0	3.0								0
ENSG00000159445	THEM4	Q5T1C6	Q5T1C6	1_151902101_T_C	rs2130525	0.019685888	0.000947079	1	8.43e-07	0.608523554	2.73e-07	0.80506673	3.31e-24	0.776361792	0.36087343	-0.070564904	True	130	421542.2568	0.324891201	3	0.34419536100000003	False	151902101,151838092,151841770,151845650,151846517,151848126,151858888,151859050,151862661,151865780,151868892,151878223,151881093,151882826,151882856,151892199,151894379,151894870,151894887,151896233,151897229,151897377,151897616,151898037,151898749,151898947,151899559,151900242,151900327,151901029,151901342,151901940,151903634,151903671,151903823,151904146,151907073,151907839,151909611,151909621…	1_151862661_G_A;			1_151846517_C_T;	1_151881093_G_A;1_151878223_G_T;1_151868892_C_T;1_151865780_G_A;1_151862661_G_A;1_151859050_G_A;1_151858888_A_G;1_151848126_A_T;	1_151881093_G_A;1_151878223_G_T;1_151868892_C_T;1_151865780_G_A;1_151862661_G_A;1_151859050_G_A;1_151858888_A_G;1_151848126_A_T;		0.448019802	True	False	True	True	False	False	3.0	3.0	1_151858888;1_151882856;1_151897377	rs6685187;rs10788817;rs3007711	Blood metabolite levels;Serum metabolite levels;Electrodermal activity					36	6.7199999999999965e-34
ENSG00000159592	GPBP1L1	Q9HC44	Q9HC44	1_46242066_G_C	rs61783168	0.059513705	0.003810678	1	6.04e-05	-0.6479837860000001	0.250931229	-0.415851224	0.254111524	-0.290195556	0.337866598	-0.112965189	False	202	1235975.565	0.147404916	8	0.148257078	False	46242066								0.084158416	False	False	False	False	False	False	3.0	4.0								0
ENSG00000160194	NDUFV3	P56181-2	P56181-2	21_44317309_T_C	rs2839600	2.55e-05	1.99e-07	2	1.16e-12	-0.994057859	9.4e-13	-1.0797802159999998	3.8e-17	-1.22230828	3.0200000000000003e-16	-1.042830203	True	202	8571832.249	0.184423457	12	0.140903416	True	44317309,44228895,44229483,44232369,44244195,44244241,44251018,44251223,44256314,44257051,44260825,44264597,44266500,44267147,44269293,44269355,44269681,44273163,44275033,44279455,44283718,44287714,44294444,44296278,44301456,44311717,44311718,44312134,44314875,44321643,44324906,44324960,44332858		21_44324906_CT_C;		21_44332858_C_T;	21_44324960_G_A;21_44324906_CT_C;21_44321643_G_A;21_44314875_A_G;21_44317309_T_C;			0.136138614	True	True	False	True	False	False	12.0	12.0								12	3.31e-14
ENSG00000160200	CBS	P0DN79	P0DN79	21_44488033_T_C	rs234714	8.33e-07	8.58e-09	1	9.8e-13	0.741923088	5.74e-08	0.927256924	3.33e-19	0.74336743	8.620000000000001e-11	0.597748682	True	202	64298893.48	0.18227551600000005	22	0.19071373100000005	False	4,448,803,344,488,750		21_44488755_GAA_GAAA;			21_44488755_GAA_GAAA;21_44488033_T_C;			0.205445545	False	True	False	True	False	False	22.0	22.0	21_44488033	rs234714	Plasma homocysteine levels (post-methionine load test)					9	2.52e-14
ENSG00000160213	CSTB	P04080	P04080	21_45201832_G_A	rs35285321	0.001080341	2.81e-05	1	7.570000000000001e-10	-0.478882955	2.84e-13	-0.550917517	1.5499999999999994e-27	-0.839818545	8.46e-28	-0.6835873459999999	True	202	24928828.13	0.226684717	5	0.305332304	False	4,520,183,245,196,320								0.33168316800000003	False	False	False	False	False	False	5.0	5.0								31	6.13e-30
ENSG00000160214	RRP1	P56182	P56182	21_45240755_A_G	rs34851196	0.04789836	0.0028201890000000003	1	1.31e-05	-0.387078239	0.024121117	-0.523959309	0.6298691710000001	-0.189109243	0.858673495	-0.009643141	False	202	21666917.15	0.137138957	16	0.119117819	False	###############################################################################################################################################################################################################################################################	21_45220483_A_G;				21_45218440_C_T;21_45217753_C_T;21_45217093_A_G;21_45216987_A_G;21_45215877_T_C;21_45211716_C_T;	21_45217753_C_T;21_45217093_A_G;21_45216987_A_G;21_45215877_T_C;21_45211716_C_T;		0.17574257399999998	False	False	True	True	False	False	12.0	16.0								6	9.38e-15
ENSG00000160221	C21orf33	A0A096LPI6	A0A096LPI6	21_45567351_G_A	rs9680179	0.023208553	0.001165453	1	1.97e-06	-0.632130641	0.000429166	-0.412901797	2.82e-12	-0.932049276	0.004998855	-0.268193648	True	202	19849755.44	0.169744457	7	0.167007874	False	45567351,45434264,45435187,45437175,45439812,45440384,45441542,45442099,45444829,45449845,45450717,45450869,45452249,45453616,45454778,45469649,45469760,45470771,45470995,45475489,45476261,45476546,45476828,45477156,45477866,45478673,45478904,45480861,45481337,45481956,45483233,45486489,45486902,45487181,45487294,45488190,45488279,45489322,45489878,45490182,45490684,45491365,45491915,45492378,454…	21_45553596_T_C;	21_45563819_CAAGAACACCAGCGGGGCTGTTGCC_C;21_45563817_ACCAAGAACACCAGCGGGGCTGTTG_A;21_45561858_T_TG;21_45560223_GGGTGTGTACAGCCGTGCAGGCCTCGGGGAGGGAGGGAGGAGGGTGCGTGGGCCCGCGGCCTCTGTTCTCAGCCAGGAGCTGCCGCTGATCCTGAAAACTCACAGCTGCTTTTCTTGTTTTAACTGAGGGGATTTCACACGATGTCACTGGTGACTTAACAGGAAGGAGAGGCACAGTGCACTTCCCTAGAGGAGGCCTGGAATTCTCTTGGCTCCCAGAGGTGTCCCTAGGCAGTCCCTCAGGACCCCTATCCTTTACCAGACCCCTTCTCCCAAGCCCCTTAGCCACA…	21_45561039_T_C;21_45560223_GGGTGTGTACAGCCGTGCAGGCCTCGGGGAGGGAGGGAGGAGGGTGCGTGGGCCCGCGGCCTCTGTTCTCAGCCAGGAGCTGCCGCTGATCCTGAAAACTCACAGCTGCTTTTCTTGTTTTAACTGAGGGGATTTCACACGATGTCACTGGTGACTTAACAGGAAGGAGAGGCACAGTGCACTTCCCTAGAGGAGGCCTGGAATTCTCTTGGCTCCCAGAGGTGTCCCTAGGCAGTCCCTCAGGACCCCTATCCTTTACCAGACCCCTTCTCCCAAGCCCCTTAGCCACAGTACCCCCAACCCCGCTGACTTCTGGCCAGTCACTGCAGCACGTGCTCCATCCCTGACGCCATCCACTCCCAGCGGCCTCC…	21_45565473_C_T;21_45561039_T_C;21_45560223_GGGTGTGTACAGCCGTGCAGGCCTCGGGGAGGGAGGGAGGAGGGTGCGTGGGCCCGCGGCCTCTGTTCTCAGCCAGGAGCTGCCGCTGATCCTGAAAACTCACAGCTGCTTTTCTTGTTTTAACTGAGGGGATTTCACACGATGTCACTGGTGACTTAACAGGAAGGAGAGGCACAGTGCACTTCCCTAGAGGAGGCCTGGAATTCTCTTGGCTCCCAGAGGTGTCCCTAGGCAGTCCCTCAGGACCCCTATCCTTTACCAGACCCCTTCTCCCAAGCCCCTTAGCCACAGTACCCCCAACCCCGCTGACTTCTGGCCAGTCACTGCAGCACGTGCTCCATCCCTGACGCCATCC…	21_45564575_G_C;21_45564190_A_G;21_45564060_A_G;21_45563826_A_G;21_45563819_CAAGAACACCAGCGGGGCTGTTGCC_C;21_45563817_ACCAAGAACACCAGCGGGGCTGTTG_A;21_45563506_T_C;21_45562617_G_A;21_45562590_G_A;21_45562551_T_C;21_45562451_G_A;21_45561858_T_TG;21_45561858_T_G;21_45561039_T_C;21_45560223_GGGTGTGTACAGCCGTGCAGGCCTCGGGGAGGGAGGGAGGAGGGTGCGTGGGCCCGCGGCCTCTGTTCTCAGCCAGGAGCTGCCGCTGATCCTGAAAACTCACAGCTGCTTTTC…		21_45565473_C_T;	0.185643564	True	True	True	True	True	True	7.0	7.0								6	1e-10
ENSG00000160293	VAV2	P52735-3	P52735-3	9_136810524_G_A	rs503596	3.71e-05	6.28e-07	1	1.52e-10	-0.633166624	1.62e-08	-0.630495135	3.18e-12	-0.52841691	1.7700000000000002e-18	-0.527909395	True	202	10992969.51	0.153204759	28	0.12796176199999998	False	136,810,524,136,806,000,000,000,000,000,000,000,000,000,000,000,000,000,000,000,000,000,000,000,000,000,000,000,000,000,000,000,000,000,000,000,000,000,000,000,000,000,000,000,000,000,000,000,000,000,000,000,000,000,000,000,000,000,000,000		9_136812821_CA_C;			9_136815555_T_A;9_136815528_G_C;9_136814708_T_C;9_136814445_A_G;9_136813653_G_A;9_136813341_C_T;9_136812821_CA_C;9_136812776_A_G;9_136812499_G_A;9_136812404_C_G;9_136812334_A_G;9_136812283_G_C;9_136812251_A_C;9_136811772_G_A;9_136811353_A_C;9_136808632_A_C;9_136808390_C_T;9_136807674_T_C;9_136806851_G_A;9_136810524_G_A;			0.413366337	False	True	False	True	False	False	25.0	28.0					Astle-W_hct_EUR_2017;Astle-W_hgb_EUR_2017	0.0006665789999999999	0.000666415	0
ENSG00000160439	RDH13	Q8NBN7	Q8NBN7	19_55544095_A_G	rs41275826	0.000468134	1.09e-05	1	1.77e-10	-0.902616648	1.53e-07	-0.8634573940000001	0.002711837	-0.5312856260000001	2.72e-05	-0.500768084	True	202	5818434.424	0.203631408	11	0.212383157	False	555,440,955,552,253,000,000,000,000,000,000,000,000,000,000,000,000,000,000,000,000,000,000,000,000,000,000,000,000,000,000,000,000,000,000,000,000,000,000,000,000,000,000,000,000,000,000,000		19_55561469_GC_G;19_55561332_C_CTT;19_55561332_CT_C;		19_55558598_G_A;	19_55570994_G_A;19_55561469_GC_G;19_55561405_G_C;19_55561332_C_CTT;19_55561332_CT_C;19_55560985_G_A;19_55558922_C_T;19_55558598_G_A;19_55558259_A_G;	19_55570994_G_A;19_55561469_GC_G;19_55561405_G_C;19_55561332_C_CTT;19_55561332_CT_C;19_55560985_G_A;19_55558922_C_T;19_55558598_G_A;19_55558259_A_G;		0.116336634	True	True	False	True	False	False	11.0	11.0								27	1.05e-28
ENSG00000160741	CRTC2	H0YDQ8	H0YDQ8	1_154113138_A_G		0.061434625	0.002017138	2	1.29e-05	0.929297818	0.00011892	0.8845073520000001	0.259716978	0.381939548	0.991973068	-0.00110775	False	103	121806.1867	0.17207347399999998	1	0.150660938	False	154,113,138,154,113,000								0.089108911	False	False	False	False	False	False	1.0	1.0								0
ENSG00000160752	FDPS	P14324-2	P14324-2	1_155279482_T_G	rs2297480	0.003223535	0.0001	1	2.9600000000000005e-09	-0.593520942	1.76e-07	-0.675788473	3.9399999999999997e-35	-0.560154865	0.000262862	-0.232520085	True	202	55304185.16	0.16837470100000002	12	0.200636569	False	155279482,155227802,155228046,155229222,155229766,155229915,155230131,155230705,155231545,155232074,155234821,155235493,155239624,155240371,155241103,155241361,155244092,155245318,155247707,155248113,155248575,155249698,155250691,155252833,155253308,155253583,155255837,155255906,155256082,155256231,155257492,155258756,155259323,155260096,155260383,155262613,155265177,155266335,155268120,155268425…					1_155289545_T_G;1_155286258_C_T;1_155285854_T_C;1_155284586_T_A;1_155284261_C_T;1_155282829_A_G;1_155280164_T_C;1_155279482_T_G;			0.252475248	False	False	False	True	False	False	12.0	12.0	1_155230131;1_155230131;1_155256231;1_155272274	rs3180018;rs3180018;rs12724449;rs7524950	Crohn's disease;Inflammatory bowel disease;Red cell distribution width;Breast cancer		IBDGC_Chrons-Disease_EUR_2015;IBDGC_IBD_EUR_2015;MAGIC_HbA1c_EUR_2017	1.999957	2.169999999999998e-97	5	1.4799999999999998e-20
ENSG00000160867	FGFR4	P22455	P22455	5_176533388_A_T	rs56221328	0.052453758	0.00320585	1	4.24e-05	-0.595101991	0.015352531	-0.623020392	0.0007930480000000001	-0.5082909520000001	0.434322057	0.078734818	True	157	231661.8217	0.308879611	2	0.417264529	True	176,533,388,176,535,000,000,000,000,000,000,000,000,000,000,000,000,000,000,000,000,000,000,000								0.173267327	False	False	False	False	False	False	2.0	2.0	5_176726635;5_176726635;5_176726635;5_176726635;5_176726635;5_176726635	rs3088050;rs3088050;rs3088050;rs3088050;rs3088050;rs3088050	Waist circumference adjusted for BMI (joint analysis main effects and physical activity interaction);Waist circumference adjusted for BMI in active individuals;Waist circumference adjusted for body mass index;Waist-to-hip ratio adjusted for BMI;Waist-to-hip ratio adjusted for BMI (age <50);Waist-to-hip ratio adjusted for BMI x sex x age interaction (4df test)					0
ENSG00000161036	LRWD1	Q9UFC0	Q9UFC0	7_102113909_C_T	rs1131383	0.000367087	8.42e-06	1	5.95e-08	-0.583383436	5.110000000000001e-07	-0.535340295	1.54e-18	-0.858152305	3.52e-23	-0.840830073	True	202	16158426.36	0.113378935	22	0.12277246	False	102,113,909,102,099,000,000,000,000,000,000,000								0.264851485	False	False	False	False	False	False	21.0	22.0								29	5.75e-22
ENSG00000161513	FDXR	P22570-7	P22570-7	17_72865239_C_T	rs690418	0.000229169	4.75e-06	1	9.64e-09	-0.6386675620000001	3e-11	-0.985085886	2.79e-14	-0.782417623	5.07e-11	-0.576082571	True	202	15969362.47	0.205899587	25	0.15314298199999998	False	7,286,523,972,861,420,000,000,000,000,000,000,000,000,000,000,000,000,000,000,000,000,000,000,000,000,000,000,000,000,000,000,000,000,000,000,000,000,000,000,000,000,000,000,000,000,000,000,000,000,000,000,000,000,000,000,000,000,000,000,000,000	17_72863030_T_C;17_72862593_C_T;			17_72864768_A_G;17_72862593_C_T;	17_72867087_A_G;17_72866710_C_A;17_72866679_G_A;17_72865762_A_G;17_72864768_A_G;17_72864407_C_T;17_72864084_A_G;17_72863984_C_T;17_72863506_A_G;17_72863477_G_A;17_72863278_A_G;17_72863030_T_C;17_72862809_T_C;17_72862593_C_T;17_72862155_T_G;17_72861991_C_T;17_72861974_G_A;17_72861427_C_T;17_72865239_C_T;	17_72867087_A_G;17_72866710_C_A;17_72866679_G_A;17_72865762_A_G;17_72864768_A_G;17_72864407_C_T;17_72864084_A_G;17_72863984_C_T;17_72863506_A_G;17_72863477_G_A;17_72863278_A_G;17_72863030_T_C;17_72862809_T_C;17_72862593_C_T;17_72865239_C_T;		0.24009901	True	False	True	True	False	False	25.0	25.0								11	1.22e-25
ENSG00000161558	TMEM143	Q96AN5	Q96AN5	19_48799716_A_G	rs2292112	0.084240966	0.006087207	1	4.25e-05	0.460738603	0.000153214	0.537684556	0.039595389	0.152619056	0.041103963	-0.13920996300000002	False	134	310761.3105	0.230754808	2	0.285263404	False	487,997,164,881,151,000,000,000					19_48860231_G_A;	19_48860231_G_A;		0.346534653	False	False	False	True	False	False	2.0	2.0								1	8.45e-07
ENSG00000161618	ALDH16A1	Q8IZ83	Q8IZ83	19_49947995_T_G	rs28735534	2.29e-07	2.0100000000000003e-09	1	5.74e-14	-0.771617546	5.41e-10	-0.806853877	2.65e-27	-1.127861105	1.29e-27	-1.189617315	True	202	13675617.22	0.18765862100000005	22	0.135572492	False	49947995,49945850,49946493,49946871,49947002,49947383,49947453,49948360,49948522,49948612,49949079,49949096,49949135,49949183,49949400,49949404,49950298,49950356,49951632,49953191,49953194,49954356,49954803,49954807,49955016,49955222,49955615,49955970,49956274,49957010,49957500,49958411,49958546,49958575,49958650,49960479,49961475,49964325,49964381,49964977,49965653,49966081,49966116,49966121,499…	19_49964977_C_G;	19_49961475_CA_C;			19_49969310_A_G;19_49968290_T_C;19_49966121_A_G;19_49966116_C_T;19_49966081_A_G;19_49965653_A_G;19_49964381_A_G;19_49964325_A_G;19_49961475_CA_C;19_49960479_T_G;19_49958650_G_A;19_49958575_G_A;19_49958546_A_G;19_49958411_A_T;19_49957500_G_C;19_49957010_C_T;	19_49969310_A_G;19_49968290_T_C;		0.247524752	False	True	True	True	False	False	22.0	22.0								45	1.5799999999999995e-56
ENSG00000162174	ASRGL1	Q7L266	Q7L266	11_62105391_C_T	rs2513749	9.01e-06	1.29e-07	1	1.09e-11	0.795916143	6.049999999999999e-08	0.843578231	5.11e-14	1.088301804	4.72e-11	0.86938795	True	202	4503070.058	0.34627877	10	0.114698405	False	62105391,62067818,62071939,62073980,62077785,62078931,62081181,62081329,62083530,62084671,62084822,62085083,62087343,62094493,62097259,62098387,62098735,62100353,62100880,62102408,62103420,62103711,62103893,62104937,62105211,62105925,62107249,62107508,62108248,62109473,62110105,62111662,62112290,62113090,62115622,62117959,62118947,62119495,62121623,62125014,62126494,62127577,62129312,62131524,621…		11_62137578_AT_A;11_62131717_G_GTGTC;11_62110105_TG_T;11_62105211_AC_A;		11_62160725_G_T;11_62104937_T_G;11_62105391_C_T;	11_62156572_G_A;11_62156312_C_T;11_62155914_G_A;11_62151875_G_C;11_62143941_T_C;11_62137578_AT_A;11_62137245_G_A;11_62136877_T_C;11_62136152_C_G;11_62131717_G_GTGTC;11_62131717_G_C;11_62131660_G_C;11_62131524_G_A;11_62129312_G_C;11_62127577_T_C;11_62126494_A_G;11_62125014_A_G;11_62121623_C_T;11_62119495_G_C;11_62118947_C_T;11_62117959_A_G;11_62115622_A_T;11_62113090_C_T;11_62112290_A_T;11_6211166…	11_62156572_G_A;11_62156312_C_T;11_62155914_G_A;11_62151875_G_C;11_62143941_T_C;11_62137578_AT_A;11_62137245_G_A;11_62136877_T_C;11_62136152_C_G;11_62131717_G_GTGTC;11_62131717_G_C;11_62131660_G_C;11_62131524_G_A;11_62129312_G_C;11_62127577_T_C;11_62126494_A_G;11_62125014_A_G;11_62121623_C_T;11_62119495_G_C;11_62118947_C_T;11_62117959_A_G;11_62115622_A_T;11_62113090_C_T;11_62112290_A_T;11_6211166…		0.123762376	True	True	False	True	False	False	9.0	9.0	11_62103420	rs2463822	Chronic obstructive pulmonary disease-related biomarkers	1.00E-10				15	4.8899999999999994e-30
ENSG00000162377	COA7	Q96BR5	Q96BR5	1_53124696_G_T	rs6660558	0.000930994	2.35e-05	1	1.6e-08	-0.523031605	5.27e-08	-0.619720545	1.98e-08	-0.259417014	2.99e-08	-0.297738506	True	202	11488805.53	0.139833991	11	0.205874529	False	5,312,469,653,123,260,000,000,000,000,000,000,000,000								0.408415842	False	False	False	False	False	False	11.0	11.0								3	4.13e-07
ENSG00000162458	FBLIM1	Q8WUP2	Q8WUP2	1_16111720_T_C	rs10803399	0.000270766	5.91e-06	1	2.05e-09	0.511422727	1.34e-05	0.4853646270000001	8.91e-06	0.558786752	2.33e-05	0.31731153100000004	True	202	13487691.08	0.153473614	14	0.124016262	False	1,611,172,016,107,060,000,000,000,000,000,000,000,000,000,000,000,000,000,000,000,000				1_16111720_T_C;	1_16107066_G_C;			0.245049505	True	False	False	True	False	False	12.0	14.0								0
ENSG00000162551	ALPL	P05186	P05186	1_21904574_A_G	rs2242421	0.007613144	0.000299428	1	4.1e-07	-0.8531883990000001	1.55e-07	-0.963171651	3.9700000000000005e-08	-0.771512089	3.360000000000001e-09	-0.7216538459999999	True	202	29917565.73	0.123010071	22	0.128615843	False	2,190,457,421,894,780,000,000,000,000,000,000,000,000		1_21899396_A_AGC;		1_21904574_A_G;	1_21903180_C_T;1_21899396_A_AGC;1_21897903_T_C;1_21894785_G_T;			0.08663366300000001	True	True	False	True	False	False	20.0	21.0								0
ENSG00000162623	TYW3	Q6IPR3	Q6IPR3	1_75189847_T_C	rs1424671	0.000138085	2.62e-06	1	7.99e-10	-0.64614751	6.5e-11	-0.884270977	2.71e-22	-0.975365446	7.58e-24	-1.024548534	True	202	2339647.353	0.3374040170000001	7	0.746558077	False	75,189,847,751,923,300,000,000,000,000,000,000,000,000,000,000,000,000,000,000,000,000,000,000,000,000,000,000,000,000,000,000,000,000,000,000,000,000,000,000,000,000,000,000,000,000,000,000,000,000,000		1_75218612_GC_G;1_75213566_CAT_C;			1_75220929_A_G;1_75219125_T_C;1_75219066_C_G;1_75218612_GC_G;1_75216449_C_T;1_75214390_G_C;1_75213619_G_T;1_75213566_CAT_C;1_75213088_G_A;1_75211738_T_C;1_75209522_G_A;1_75209312_A_G;1_75207320_G_A;1_75205344_A_C;1_75199973_T_C;			0.487623762	False	True	False	True	False	False	7.0	7.0								6	2.15e-19
ENSG00000162769	FLVCR1	Q9Y5Y0	Q9Y5Y0	1_213079861_G_C	rs72743993	1.86e-05	2.84e-07	1	3.07e-12	0.5960978339999999	3.11e-06	0.435015875	8.190000000000001e-19	0.887226785	2.0899999999999998e-19	0.924889723	True	202	6220990.4679999985	0.308921241	8	0.185162402	False	213,079,861,213,080,000,000,000,000,000,000,000,000,000,000,000,000,000,000,000,000								0.28960396	False	False	False	False	False	False	8.0	8.0								25	1.5e-21
ENSG00000162836	ACP6	X5D289	X5D289	1_147015933_A_C	rs28633140	0.000881513	2.22e-05	1	2.3e-08	-0.988586057	5.24e-06	-0.910122951	0.088885097	-0.435148318	0.001313185	-0.568078031	True	201	1590473.7230000002	0.254738272	5	0.174380497	False	147,015,933,147,016,000,000,000,000,000,000,000,000,000,000,000,000,000,000,000,000,000,000,000,000,000,000,000,000,000,000,000,000,000,000,000,000,000,000								0.066831683	False	False	False	False	False	False	4.0	4.0								1	9.42e-06
ENSG00000163110	PDLIM5	Q96HC4	Q96HC4	4_95594456_C_G	rs17021981	0.0006604110000000001	1.65e-05	1	1.75e-09	0.6205702989999999	2.36e-09	0.7036128140000001	7.01e-09	0.44809665	8.25e-14	0.666298325	True	202	30000235.61	0.17813311199999998	24	0.121593605	False	###############################################################################################################################################################################################################################################################		4_95585642_TA_T;		4_95589337_G_A;4_95588823_G_A;4_95588674_T_C;4_95588158_C_G;4_95587259_A_C;4_95585748_C_T;4_95585642_TA_T;4_95585225_A_G;	4_95585748_C_T;4_95585642_TA_T;4_95585225_A_G;4_95583042_G_C;4_95582159_C_T;4_95581890_G_A;4_95581720_G_A;4_95581344_C_T;4_95579705_T_C;4_95575114_T_G;4_95569216_A_T;4_95568956_A_C;4_95564225_T_A;4_95562393_T_C;	4_95575114_T_G;4_95569216_A_T;4_95568956_A_C;4_95564225_T_A;4_95562393_T_C;		0.20049505	True	True	False	True	False	False	22.0	24.0								0
ENSG00000163166	IWS1	Q96ST2-3	Q96ST2-3	2_128331645_C_A	rs76746601	0.047024227	0.002747665	1	1.16e-05	-0.688659936	0.09918113	-0.637638583	0.091119135	-0.14472649	0.154819954	-0.188820394	False	202	9224333.057	0.093005955	11	0.110735415	False	128,331,645,128,329,000								0.056930693	False	False	False	False	False	False	3.0	7.0								0
ENSG00000163378	EOGT	Q5NDL2	Q5NDL2	3_69058783_C_T	rs56761230	0.001738824	4.88e-05	1	1.03e-08	-0.6713765629999999	1.27e-09	-0.7558315790000001	2.9499999999999997e-18	-0.601513992	3.1600000000000003e-21	-0.691584335	True	202	3581803.2180000013	0.187900155	13	0.195882435	False	###############################################################################################################################################################################################################################################################		3_69060357_TAAGTGCTCTTTCCACTGGATGACAGAGTCTTAATACACACTGGATGTTCATCAGCTAGGACTGCTGTTTCCTGGGTCATACCGGAAAACCCAACTTTCGAAATCAGTCTTCATTGATTATGGGCTGTGAAGATGGAACCTTTAGAAACAGACTGCAGGCCTGTAATAGTAGCACTTTGGGAGGCCAAGACTGGCAGATTGCTTGAGTCCCTGAGTTCGAGACCAGCTTGGGCAACGTGATGAAACCCGGTCTCTGCTAAGAATACAAAAAATCAGCTGTAGTCCCAGCTGAAGTGGGAGGATCACTTTAGCCTGGGAAGTCAAGGATGCAGTGAGTCGTGATCTCGCCACTGCACTCCAGCCTGGGTAATGCGAGGGAGACTCTGTC…	3_69060357_TAAGTGCTCTTTCCACTGGATGACAGAGTCTTAATACACACTGGATGTTCATCAGCTAGGACTGCTGTTTCCTGGGTCATACCGGAAAACCCAACTTTCGAAATCAGTCTTCATTGATTATGGGCTGTGAAGATGGAACCTTTAGAAACAGACTGCAGGCCTGTAATAGTAGCACTTTGGGAGGCCAAGACTGGCAGATTGCTTGAGTCCCTGAGTTCGAGACCAGCTTGGGCAACGTGATGAAACCCGGTCTCTGCTAAGAATACAAAAAATCAGCTGTAGTCCCAGCTGAAGTGGGAGGATCACTTTAGCCTGGGAAGTCAAGGATGCAGTGAGTCGTGATCTCGCCACTGCACTCCAGCCTGGGTAATGCGAGGGAGACTCTGTC…	3_69060357_TAAGTGCTCTTTCCACTGGATGACAGAGTCTTAATACACACTGGATGTTCATCAGCTAGGACTGCTGTTTCCTGGGTCATACCGGAAAACCCAACTTTCGAAATCAGTCTTCATTGATTATGGGCTGTGAAGATGGAACCTTTAGAAACAGACTGCAGGCCTGTAATAGTAGCACTTTGGGAGGCCAAGACTGGCAGATTGCTTGAGTCCCTGAGTTCGAGACCAGCTTGGGCAACGTGATGAAACCCGGTCTCTGCTAAGAATACAAAAAATCAGCTGTAGTCCCAGCTGAAGTGGGAGGATCACTTTAGCCTGGGAAGTCAAGGATGCAGTGAGTCGTGATCTCGCCACTGCACTCCAGCCTGGGTAATGCGAGGGAGACTCTGTC…	3_69060854_C_T;3_69060357_TAAGTGCTCTTTCCACTGGATGACAGAGTCTTAATACACACTGGATGTTCATCAGCTAGGACTGCTGTTTCCTGGGTCATACCGGAAAACCCAACTTTCGAAATCAGTCTTCATTGATTATGGGCTGTGAAGATGGAACCTTTAGAAACAGACTGCAGGCCTGTAATAGTAGCACTTTGGGAGGCCAAGACTGGCAGATTGCTTGAGTCCCTGAGTTCGAGACCAGCTTGGGCAACGTGATGAAACCCGGTCTCTGCTAAGAATACAAAAAATCAGCTGTAGTCCCAGCTGAAGTGGGAGGATCACTTTAGCCTGGGAAGTCAAGGATGCAGTGAGTCGTGATCTCGCCACTGCACTCCAGCCTGGGTAATGC…	3_69060854_C_T;3_69060357_TAAGTGCTCTTTCCACTGGATGACAGAGTCTTAATACACACTGGATGTTCATCAGCTAGGACTGCTGTTTCCTGGGTCATACCGGAAAACCCAACTTTCGAAATCAGTCTTCATTGATTATGGGCTGTGAAGATGGAACCTTTAGAAACAGACTGCAGGCCTGTAATAGTAGCACTTTGGGAGGCCAAGACTGGCAGATTGCTTGAGTCCCTGAGTTCGAGACCAGCTTGGGCAACGTGATGAAACCCGGTCTCTGCTAAGAATACAAAAAATCAGCTGTAGTCCCAGCTGAAGTGGGAGGATCACTTTAGCCTGGGAAGTCAAGGATGCAGTGAGTCGTGATCTCGCCACTGCACTCCAGCCTGGGTAATGC…	3_69054341_T_C;	0.237623762	True	True	False	True	True	True	13.0	13.0								4	1.09e-10
ENSG00000163389	POGLUT1	Q8NBL1	Q8NBL1	3_119191398_T_C	rs6794833	1.4800000000000002e-05	2.19e-07	1	1.81e-12	-0.60723073	2.05e-06	-0.538906198	1.2199999999999999e-16	-0.580761136	4.49e-17	-0.641624593	True	202	7907491.517999997	0.134346019	14	0.123366739	False	119,191,398,119,192,000,000,000,000,000,000,000		3_119192185_CAAATG_C;			3_119196781_G_A;3_119196334_G_T;3_119192185_CAAATG_C;3_119191398_T_C;	3_119196781_G_A;3_119196334_G_T;3_119192185_CAAATG_C;3_119191398_T_C;		0.477722772	False	True	False	True	False	False	14.0	14.0								27	8.8e-28
ENSG00000163507	KIAA1524	Q8TCG1	Q8TCG1	3_108297389_G_A	rs12497782	0.061366753	0.004022636	1	8.75e-06	-0.401035765	0.105273422	-0.382699263	0.653792724	-0.136310263	0.000408074	-0.17927022399999998	True	202	18866163.38	0.098437576	35	0.099032858	False	108297389,108266381,108268018,108269838,108271352,108272414,108275145,108278471,108285722,108289096,108291594,108293368,108294176,108294263,108295067,108297817,108299228,108304835,108313556,108314295,108319193,108324365,108326689,108328257,108329149,108331066,108331322,108331606,108334943,108336262,108338852,108340442,108342003,108348709,108351480,108351501,108352911,108352979,108358969,108359166…		3_108299228_TTTAA_T;3_108294263_ATATACATG_A;3_108294163_GCATGTACACACACGTG_G;3_108291594_AC_A;3_108289096_GTCTC_G;		3_108269838_C_T;	3_108304835_T_C;3_108299228_TTTAA_T;3_108297817_C_T;3_108295067_G_A;3_108294263_ATATACATG_A;3_108294163_GCATGTACACACACGTG_G;3_108293368_G_T;3_108291594_AC_A;3_108289096_GTCTC_G;3_108285722_T_C;3_108278471_G_A;3_108275145_A_C;3_108271352_A_T;3_108297389_G_A;	3_108304835_T_C;3_108299228_TTTAA_T;3_108297817_C_T;3_108295067_G_A;3_108294263_ATATACATG_A;3_108294163_GCATGTACACACACGTG_G;3_108293368_G_T;3_108291594_AC_A;3_108289096_GTCTC_G;3_108285722_T_C;3_108278471_G_A;3_108275145_A_C;3_108271352_A_T;3_108297389_G_A;		0.242574257	True	True	False	True	False	False	27.0	35.0								0
ENSG00000163703	CRELD1	Q96HD1-2	Q96HD1-2	3_9975386_C_G	rs2270894	0.015443619	0.0006977919999999999	1	5.2e-07	0.428967186	5.72e-06	0.687446927	8.380000000000001e-08	0.498053835	6.98e-17	0.655085072	True	202	2937138.807	0.211208328	7	0.135073682	False	9975386								0.183168317	False	False	False	False	False	False	7.0	7.0	3_9975386;3_9975386;3_9975386	rs2270894;rs2270894;rs2270894	Blood protein levels;Heel bone mineral density;Lung function (FEV1/FVC)					30	4.92e-89
ENSG00000163913	IFT122	Q9HBG6-3	Q9HBG6-3	3_129257368_C_T		0.016002555	0.0007286660000000001	1	1.13e-06	-0.721460535	3.429999999999999e-09	-0.902655114	1.23e-12	-0.8924476929999999	1.23e-16	-0.946344771	True	202	4757611.942	0.243476771	20	0.370123352	True	129257368								0.133663366	False	False	False	False	False	False	16.0	17.0								0
ENSG00000163938	GNL3	Q9BVP2-2	Q9BVP2-2	3_52622086_G_A	rs2590838	0.000146261	2.81e-06	1	1.51e-08	0.455822595	2.35e-05	0.407403887	5.08e-20	0.397511811	0.127964763	0.094156899	True	202	48810423.04	0.119021144	26	0.151069171	True	5,262,208,652,584,430,000,000,000,000,000,000,000,000,000,000,000,000,000,000,000,000,000,000,000,000,000,000,000,000,000,000,000,000,000,000,000,000,000,000,000,000,000,000,000,000,000,000,000,000,000,000,000,000,000,000,000,000,000,000,000,000		3_52722266_AT_A;		3_52720080_A_C;	3_52722335_A_C;3_52722266_AT_A;3_52720080_A_C;3_52719816_C_T;	3_52722335_A_C;3_52722266_AT_A;3_52720080_A_C;		0.492574257	True	True	False	True	False	False	23.0	26.0	3_52622086;3_52622086;3_52622086;3_52622086;3_52622086;3_52628056;3_52628056;3_52637486;3_52637486;3_52648265;3_52648265;3_52649748;3_52649748;3_52649748;3_52649748;3_52649748;3_52719816;3_52720080;3_52720080;3_52745087;3_52745087;3_52814256;3_52815905;3_52815905;3_52815905;3_52815905;3_52815905;3_52815905;3_52815905;3_52815905;3_52815905;3_52815905	rs2590838;rs2590838;rs2590838;rs2590838;rs2590838;rs2577831;rs2577831;rs2276824;rs2276824;rs9879090;rs9879090;rs13083798;rs13083798;rs13083798;rs13083798;rs13083798;rs10933;rs1108842;rs1108842;rs11235;rs11235;rs2302417;rs2710323;rs2710323;rs2710323;rs2710323;rs2710323;rs2710323;rs2710323;rs2710323;rs2710323;rs2710323	Adiponectin levels;Body mass index;Waist-to-hip ratio adjusted for BMI (joint analysis for main effect and physical activity interaction);Waist-to-hip ratio adjusted for BMI in active individuals;Waist-to-hip ratio adjusted for body mass index;Red blood cell count;Schizophrenia;Waist-to-hip ratio adjusted for BMI (adjusted for smoking behaviour);Waist-to-hip ratio adjusted for body mass index;Fee…		Astle-W_hct_EUR_2017;Astle-W_hgb_EUR_2017;Astle-W_hlr-p_EUR_2017;Astle-W_irf_EUR_2017;GIANT_BMI-adjusted-PA_EUR_2017;GIANT_BMI_EUR_2018;GIANT_Height-F_EUR_2013;GIANT_WCadjBMI_Mixed_2015;GIANT_WHR-Active-F_Mixed_2017;GIANT_WHR-Active_EUR_2017;GIANT_WHR-adjusted-PA-F_Mixed_2017;GIANT_WHR-adjusted-PA_EUR_2017;GIANT_WHR-adjusted-Smoking-F_Mixed_2017;GIANT_WHR-adjusted-Smoking_EUR_2017;GIANT_WHRadjBMI…	2.0	0.323203	14	1.8600000000000003e-17
ENSG00000163956	LRPAP1	P30533	P30533	4_3501442_G_A	rs11736835	5.24e-06	6.86e-08	1	3.33e-14	0.682969055	4.98e-09	0.580659983	4.39e-17	0.725213083	1.9100000000000007e-15	0.566961052	True	202	26744356.56	0.160167263	14	0.216082188	False	3501442								0.49009901	False	False	False	False	False	False	13.0	14.0								3	7.26e-13
ENSG00000164024	METAP1	P53582	P53582	4_99916387_T_A	rs6850128	0.077043852	0.005383385	1	1.14e-05	-0.462961317	0.004973812	-0.398569181	1.01e-14	-0.232835946	1.29e-05	-0.224079381	True	202	38001233.37	0.08810010900000001	26	0.124209276	False	99916387,99900867,99900872,99901167,99901681,99902792,99903268,99904698,99905192,99906333,99907120,99909034,99909550,99909908,99910848,99910923,99913471,99913732,99915019,99915520,99916421,99918661,99919784,99924219,99926965,99928912,99933404,99934460,99939844,99942649,99944232,99946126,99948406,99950682,99951931,99952710,99961625,99966568,99975032,99976646,99978183		4_99951931_GT_G;4_99924219_A_AAAAC;		4_99952710_A_G;4_99926965_T_C;	4_99978183_A_G;4_99976646_G_T;4_99975032_T_C;4_99966568_G_C;4_99952710_A_G;4_99951931_GT_G;4_99950682_C_T;4_99948406_G_A;4_99946126_A_G;4_99944232_C_T;4_99942649_A_G;4_99939844_C_T;4_99934460_C_T;4_99933404_C_T;4_99928912_T_A;4_99926965_T_C;4_99924219_A_AAAAC;4_99919784_C_T;4_99918661_A_C;	4_99952710_A_G;4_99951931_GT_G;4_99950682_C_T;4_99948406_G_A;4_99946126_A_G;4_99944232_C_T;4_99942649_A_G;4_99939844_C_T;4_99934460_C_T;4_99933404_C_T;4_99928912_T_A;4_99926965_T_C;4_99924219_A_AAAAC;4_99919784_C_T;4_99918661_A_C;		0.393564356	True	True	False	True	False	False	20.0	26.0								4	1.45e-08
ENSG00000164051	CCDC51	Q96ER9	Q96ER9	3_48487353_A_C	rs9838618	0.012533781	0.000534039	1	2.01e-05	-0.314847884	0.454891084	-0.298987742	0.004157905999999999	-0.289316583	0.000412011	-0.237414763	True	202	7999189.304	0.196779346	17	0.182404344	False	48487353,48412671,48413179,48413537,48414215,48415007,48415903,48416186,48416756,48418214,48418219,48418226,48418377,48418571,48418708,48419689,48419723,48419897,48420308,48420314,48421258,48421387,48422235,48422574,48423656,48423950,48425675,48426076,48426766,48426887,48427247,48427979,48428431,48428911,48428932,48429038,48430465,48430617,48433635,48434063,48434398,48434748,48435090,48435123,484…				3_48481647_G_A;3_48481434_G_T;3_48479618_C_T;	3_48481434_G_T;3_48479737_A_T;3_48479618_C_T;3_48479207_C_T;3_48479039_G_A;3_48478039_C_T;		3_48474249_A_G;	0.485148515	True	False	False	True	False	True	15.0	17.0	3_48487338	rs9876781	Longevity	1.00E-06				1	4.08e-05
ENSG00000164142	FAM160A1	Q05DH4	Q05DH4	4_152297368_T_C	rs9968292	0.000250343	5.36e-06	1	1.65e-08	-0.482734348	8.15e-06	-0.591064087	0.0006871789999999999	-0.237036429	2.98e-17	-0.428638815	True	202	3877611.0	0.15751880599999998	17	0.171589561	False	152297368,152261703,152263402,152263830,152278358,152278707,152280898,152291432,152291689,152301185,152302783,152304376,152304728,152306552,152310788,152311322,152316139,152316901,152318924,152319045,152320532,152321631,152321881,152322146,152322571,152322659,152325385,152325939,152326990,152327017,152329404,152330294,152331252,152332120,152334662,152335749,152340446,152341717,152341878,152342190…		4_152452656_CT_C;4_152452653_CTTCT_C;4_152452098_T_TC;4_152444630_AT_A;4_152411893_TA_T;4_152389986_CT_C;4_152375317_A_AG;4_152373929_CA_C;4_152356319_ACTATAGTC_A;4_152355268_C_CC;4_152346935_G_GCAT;			4_152452656_C_T;4_152452656_CT_C;4_152452653_CTTCT_C;4_152452398_G_A;4_152452128_T_G;4_152452098_T_TC;4_152451819_T_C;4_152451453_G_A;4_152450300_A_G;4_152450126_G_A;4_152450095_C_A;4_152447972_G_A;4_152447006_T_A;4_152446832_T_A;4_152445831_A_C;4_152445227_A_G;4_152444631_T_A;4_152444630_AT_A;4_152443273_C_T;4_152441914_G_A;4_152438850_G_C;4_152434062_T_G;4_152434028_G_T;4_152433522_G_C;4_152432…			0.492574257	False	True	False	True	False	False	16.0	17.0	4_152342190	rs2709821	White blood cell count					12	1.19e-28
ENSG00000164307	ERAP1	Q9NZ08	Q9NZ08	5_96123055_A_G	rs469367	1.6699999999999998e-09	7.05e-12	1	1.1e-17	-0.982102777	3.19e-10	-0.790297887	1.4e-13	-0.868707914	1.96e-18	-0.951117825	True	202	11683456.52	0.240231647	24	0.148863757	True	###############################################################################################################################################################################################################################################################					5_96138861_C_T;5_96138812_A_G;5_96138767_T_C;5_96137882_A_G;5_96137840_A_G;5_96137804_A_G;5_96137496_G_A;5_96134113_A_G;5_96133920_C_T;5_96133712_A_C;5_96133427_C_T;5_96131733_G_A;5_96130015_G_C;5_96130014_TG_CC;5_96130014_TG_CC;5_96130014_T_C;5_96128400_G_T;5_96127905_T_C;5_96125465_G_A;5_96125314_A_T;5_96124959_T_G;5_96124447_G_C;5_96123160_T_C;5_96123055_A_G;		5_96129512_A_G;	0.215346535	False	False	False	True	False	True	24.0	24.0	5_96129512;5_96130014	rs27434;rs469735	Ankylosing spondylitis;Blood protein levels		Benyamin-B_ALS_Mixed_2017;GIANT_BMI_EUR_2018	0.001422154	6.64e-51	42	5.849999999999997e-53
ENSG00000164347	GFM2	Q969S9	Q969S9	5_74039150_C_A	rs11743415	0.059513705	0.003823008	1	1.68e-06	0.6999621779999999	0.005696262	0.5971746520000001	0.435945794	0.113711917	0.738981718	0.035414971	False	202	6198216.266	0.12837696699999998	18	0.17731704899999998	False	###############################################################################################################################################################################################################################################################		5_74058847_TTAAAG_T;			5_74058847_TTAAAG_T;5_74050752_C_T;5_74047692_C_T;5_74044609_G_A;5_74030081_T_C;5_74029586_A_T;5_74024873_G_A;5_74020029_C_T;5_74039150_C_A;		5_74046464_C_T;	0.118811881	False	True	False	True	False	True	17.0	18.0								0
ENSG00000164535	DAGLB	E7ET49	E7ET49	7_6347147_G_A	rs78028701	0.053864699	0.003314767	1	3.7000000000000006e-06	-0.682856055	0.008555206	-0.6547687179999999	0.123918	-0.180871788	0.19252314	-0.167655212	False	202	5580976.9410000015	0.166402549	15	0.154349504	False	63,471,476,344,575								0.123762376	False	False	False	False	False	False	10.0	10.0								0
ENSG00000164828	SUN1	O94901-9	O94901-9	7_746097_A_G	rs74938691	0.077987776	0.0055320840000000005	1	5.59e-05	-0.29493769	0.010773699	-0.420383894	1.166599158	-0.20796947	0.068981059	-0.135482341	False	202	12156950.65	0.143917984	25	0.136183468	False	746,097,746,100,747,000,000,000,000,000								0.415841584	False	False	False	False	False	False	22.0	25.0								0
ENSG00000164904	ALDH7A1	A0A1B0GW77	A0A1B0GW77	5_125932722_G_A	rs34450389	0.001519884	2.0600000000000006e-05	2	1.3900000000000002e-09	0.888006448	4.43e-07	0.7357523109999999	6.73e-07	0.846720354	3.27e-07	0.726528903	True	202	113213343.6	0.147484161	28	0.074040605	False	125932722,125904304,125904729,125904970,125908203,125908599,125909451,125910078,125910115,125910169,125912120,125912471,125913012,125913560,125913691,125914326,125914330,125914726,125915374,125915685,125915744,125915922,125916032,125916297,125917249,125917657,125918041,125918148,125919066,125919360,125921381,125921498,125924043,125926839,125927917,125928737,125929807,125931022,125940176,125940521…		5_125915685_TTTAATTG_T;5_125914330_CA_C;5_125914329_TC_T;5_125913012_GT_G;		5_125931022_T_G;5_125929807_T_C;	5_125929807_T_C;5_125928737_C_T;5_125927917_C_T;5_125926839_T_C;5_125924043_T_A;5_125921498_G_A;5_125921381_G_A;5_125919360_G_C;5_125919066_G_A;5_125918148_A_G;5_125918041_C_T;5_125917657_G_A;5_125917249_G_T;5_125916032_G_A;5_125915922_C_G;5_125915744_T_C;5_125915685_TTTAATTG_T;5_125915374_G_T;5_125914726_A_T;5_125914330_CA_C;5_125914329_TC_T;5_125914326_G_A;5_125913691_T_C;5_125913560_A_C;5_1259…	5_125931022_T_G;5_125929807_T_C;5_125928737_C_T;5_125927917_C_T;5_125926839_T_C;5_125924043_T_A;5_125921498_G_A;5_125921381_G_A;5_125919360_G_C;5_125919066_G_A;5_125918148_A_G;5_125918041_C_T;5_125917657_G_A;5_125917249_G_T;5_125916032_G_A;5_125915922_C_G;5_125915744_T_C;5_125915685_TTTAATTG_T;5_125915374_G_T;5_125914726_A_T;5_125914330_CA_C;5_125914329_TC_T;5_125914326_G_A;5_125913691_T_C;5_1259…		0.089108911	True	True	False	True	False	False	25.0	27.0								26	5.32e-23
ENSG00000164978	NUDT2	P50583	P50583	9_34270176_G_A	rs79645455	7.96e-05	1.4e-06	1	1.23e-11	0.775009506	2.7e-13	1.189120954	1.13e-23	1.239548848	1.44e-19	1.0003871	True	202	3626402.014	0.240422801	7	0.20254880600000005	False	34270176,34165200,34207275,34226942,34263389,34264597,34268702,34269079,34271381,34282388,34284727,34284752,34287840,34296170,34299264,34305075,34305076,34306746,34307413,34307722,34309431,34310083,34310357,34312748,34314383,34317367,34318193,34318289,34320195,34320525,34324168,34324677,34326983,34329110,34329851,34332740,34334793,34336342,34336681,34337967,34338552,34340949,34342001,34342634,343…		9_34338552_AC_A;9_34329851_G_GGGT;	9_34336342_A_G;		9_34342634_A_G;9_34342001_C_A;9_34340949_A_G;9_34338552_AC_A;9_34337967_G_A;9_34336681_A_T;9_34336342_A_G;9_34334793_G_A;9_34332740_A_G;9_34329851_G_GGGT;			0.163366337	False	True	False	True	True	False	7.0	7.0					Astle-W_hlr-p_EUR_2017;Astle-W_irf_EUR_2017;MAGIC_FI-METABO_EUR_2012	0.996823763	0.0	39	1.0499999999999998e-73
ENSG00000165118	C9orf64	Q5T6V5	Q5T6V5	9_86620546_C_T	rs10780639	0.014799544	0.0006600289999999999	1	1.86e-07	-0.614590506	1.9e-05	-0.5695782420000001	7.12e-10	-0.69070916	9.44e-11	-0.7014702759999999	True	202	6752055.203	0.426114363	15	0.323485679	False	86620546,86549939,86563495,86571611,86589215,86597208,86597806,86599756,86602030,86602783,86603184,86604087,86604811,86604846,86604999,86610208,86611406,86615745,86621533,86622349,86623253,86623268,86624622,86626672,86627385,86628941,86632067,86632714,86632731,86632846,86633602,86636308,86636430,86640123,86640377				9_86571611_A_G;	9_86571611_A_G;9_86563495_A_C;			0.477722772	True	False	False	True	False	False	14.0	15.0	9_86623268	rs4877815	Lung function (FVC)					9	9.36e-10
ENSG00000165233	C9orf89	Q96LW7-2	Q96LW7-2	9_95859739_T_C	rs4077822	0.006910182	0.000266118	1	1.07e-07	0.5127491820000001	0.041031513	0.321558187	4.1600000000000005e-09	0.635565237	8.45e-09	0.309723918	True	202	1353854.938	0.18299161	5	0.11589691	False	958,597,399,585,772,000,000,000,000,000,000,000,000,000,000,000,000,000,000,000,000,000,000,000,000,000,000,000,000,000,000,000,000,000,000,000,000,000,000,000		9_95864147_AT_A;		9_95875556_G_A;	9_95872216_T_G;9_95865383_G_T;9_95864147_AT_A;9_95863862_C_T;9_95862541_G_A;9_95860415_G_A;9_95859739_T_C;	9_95875556_G_A;9_95872216_T_G;9_95865383_G_T;9_95864147_AT_A;9_95863862_C_T;9_95862541_G_A;9_95860415_G_A;9_95859739_T_C;		0.247524752	True	True	False	True	False	False	5.0	5.0								35	2.47e-29
ENSG00000165238	WNK2	Q9Y3S1-4	Q9Y3S1-4	9_96045173_C_T	rs7848843	0.000437721	1.01e-05	1	2.1100000000000004e-09	0.603375086	9.36e-05	0.73270858	2.730000000000001e-05	0.35402038700000005	3.6e-08	0.349100644	True	202	6647830.84	0.140217292	20	0.151346347	False	960,451,739,600,298,000,000,000,000,000,000,000,000,000,000,000,000,000,000,000,000,000,000,000,000,000,000,000,000,000,000,000,000,000,000,000,000,000,000,000,000,000,000,000,000,000,000,000,000,000,000,000,000,000,000,000				9_96082752_G_T;9_96080699_C_T;	9_96080699_C_T;9_96078870_T_G;9_96077236_A_G;9_96067214_G_A;9_96058022_C_G;9_96052684_A_T;9_96048514_G_A;9_96044418_G_T;9_96036574_C_T;9_96036008_G_A;9_96032279_G_C;9_96027080_G_A;9_96025052_T_C;9_96024883_C_T;9_96002983_C_T;9_96045173_C_T;		9_96026243_G_A;9_96024182_G_C;	0.138613861	True	False	False	True	False	True	18.0	20.0								2	1.06e-16
ENSG00000165392	WRN	Q14191	Q14191	8_30958232_A_G	rs11574273	3.3e-06	3.9e-08	1	2.46e-10	-1.194540502	0.0007448880000000001	-1.184015813	1.4400000000000006e-11	-0.553407068	2.51e-18	-1.259025527	True	202	13026891.69	0.099996088	38	0.143937509	True	3,095,823,230,973,640,000,000,000,000,000,000,000,000,000,000,000,000,000,000,000,000,000,000,000,000,000,000,000,000,000,000,000,000,000,000,000,000,000,000,000,000,000,000,000,000		8_30998081_CAGCTGTTT_C;			8_31015304_C_T;8_31010288_C_T;8_31002562_G_A;8_31002096_G_A;8_31002004_G_C;8_31000860_G_A;8_30998081_CAGCTGTTT_C;8_30997096_G_A;8_30993186_A_T;8_30991868_A_G;8_30991744_G_A;8_30987585_A_G;8_30987057_A_G;8_30982552_G_C;8_30973642_C_T;8_30958232_A_G;			0.047029703	False	True	False	True	False	False	20.0	21.0								3	1.17e-09
ENSG00000165410	CFL2	Q9Y281	Q9Y281	14_35180033_C_A	rs9491	8.1e-06	1.14e-07	1	5.599999999999999e-10	0.558879598	5.079999999999999e-07	0.6040058939999999	1.05e-11	0.55766879	7.340000000000001e-21	0.649120955	True	202	7954094.806	0.203839383	10	0.263657101	False	###############################################################################################################################################################################################################################################################		14_35182348_GAA_GAAA;14_35182348_GA_G;	14_35182348_GAA_GAAA;14_35182348_GA_G;	14_35183888_C_G;14_35181786_T_C;14_35181786_T_C;14_35181146_A_G;14_35180033_C_A;14_35180033_C_A;	14_35182348_GAA_GAAA;14_35182348_GA_G;	14_35183888_C_G;14_35182348_GAA_GAAA;14_35182348_GA_G;14_35181786_T_C;14_35181786_T_C;		0.178217822	True	True	False	True	True	False	9.0	10.0	14_35173775	rs73241997	Atrial fibrillation	1.00E-13				9	3.73e-16
ENSG00000165699	TSC1	Q92574	Q92574	9_135734727_C_G	rs214637	0.024122033	0.001228267	1	3.24e-07	0.48246042	0.020289802	0.7033427809999999	0.30613954600000004	0.150290477	0.432822884	0.047336029	False	202	7533763.707	0.143768196	26	0.197452512	True	135,734,727,135,735,000								0.277227723	False	False	False	False	False	False	23.0	26.0								3	7.49e-07
[truncated: 149 more rows]
[truncated: 11 more columns]
