# Supplementary material for: Population-scale proteome variation in human induced pluripotent stem cells
Source: eLife. 2020 Aug 10;9:e57390. doi: 10.7554/eLife.57390 (PMC7447446; doi:10.7554/eLife.57390)
Supplement: Figure 2—source data 2. — Reported are genes with a significant (FDR < 10%) QTL. It consists of variants mapped at RNA, gene resolution, for genes detected at both RNA and protein levels. This table includes the features used in the prediction of the pQTL status. The table columns are analogous to Figure 2—source data 1 pQTL_results. [file elife-57390-fig2-data2.xls]

ensembl_gene_id.1	feature_id	protein_id	snp_id	snp_rsid	q-value	empirical_feature_p_value	number_features	mrna_nominal_p_value_bonf	mrna_eff_size	transcript_nominal_p_value_bonf	transcript_eff_size	peptide_nominal_p_value_bonf	peptide_eff_size	protein_nominal_p_value_bonf	protein_eff_size	protein_nlines	protein_intensity	protein_cv	protein_npeptides	protein_ce	in_corum	ld_snps	inframe_LD	frameshift_LD	splicing_LD	UTR_LD	intron_LD	NMD_transcript_LD	synonymous_LD	maf_hipsci	chromosome_gene	strand	gene_start	gene_end	ld_lead_FDR01_pqtl	lead_FDR01_pqtl	meanlogtpm
ENSG00000000460	ENSG00000000460	Q9NSG2	1_169718231_C_A	rs76538175	0.00011973958569386164	1.9510418270614e-05	1.0	3.454311995256072e-09	0.8128479463926941	0.008740458030300763	0.4814209847691258	0.3202009304876088	0.8064595524516796	0.13711863253912138	0.2110388408531274	184	884480.0179723853	0.20258896028593226	7	0.22473158838507445	False	169718231,169660665,169661555,169663938,169668608,169668856,169669143,169670940,169670941,169671217,169671237,169671277,169671386,169671788,169672867,169674403,169674561,169674983,169675349,169678333,169680074,169681908,169682512,169683044,169683133,169683576,169684341,169685196,169685222,169689016,169689800,169689832,169691221,169692121,169692713,169694720,169696033,169696754,169697076,169697166…	1_169799880_G_T;	1_169822488_T_TAAAGA;1_169799572_C_CAT;1_169795995_TGTTTA_T;1_169793299_GA_G;1_169792833_T_TAATA;1_169780830_TAGACAGATTATCTAAATAGATAAT_T;1_169780829_ATAGACAGATTATCTAAATAGATAA_A;		1_169822543_A_G;1_169822488_T_TAAAGA;1_169798732_G_C;	1_169819670_G_A;1_169816662_T_A;1_169816201_T_C;1_169816173_C_T;1_169813646_G_T;1_169813387_A_G;1_169813353_T_A;1_169812534_C_A;1_169811966_T_G;1_169811940_A_C;1_169811877_C_T;1_169810169_A_G;1_169810074_T_C;1_169809974_G_C;1_169809476_C_T;1_169809131_T_C;1_169808651_C_T;1_169807369_T_C;1_169807095_G_A;1_169805549_T_C;1_169804720_T_A;1_169803717_C_T;1_169803690_A_C;1_169800690_A_G;1_169800154_A_T…			0.08663366336633663	1	1	169631245	169823221			2.70546999933021
ENSG00000001084	ENSG00000001084	P48506	6_53363491_T_G		0.00040838110216719726	7.371223920658061e-05	1.0	9.376484514634233e-09	-0.3087228108533541	3.6724298677129022e-09	-0.5659759946516121	0.6322253318984413	-0.4160181046325295	0.3507408737755756	0.050799133575237576	202	16461017.182385568	0.14678916034410155	28	0.13110190069905187	False	53363491		6_53363490_CTGGC_C;6_53363488_GGCTG_G;6_53363487_GGGCT_G;		6_53363491_T_G;6_53363490_CTGGC_C;6_53363488_GGCTGGCTG_GGCTG;6_53363488_GGCTG_G;6_53363487_GGGCT_G;				0.4504950495049505	6	-1	53362139	53481768			2.9234664603960394
ENSG00000001561	ENSG00000001561	Q9Y6X5	6_46100182_A_G		4.278125991090086e-07	4.2465771279929686e-08	1.0	5.89927297192478e-09	0.4870435348065266	3.493151276251428e-08	0.3981282980302637	8.166138417302029e-05	0.525953266575274	2.6567999628426214e-06	0.4687735156562568	185	2061507.2330391558	0.20646226944897766	5	0.32689317503640913	False	46100182					6_46100182_A_G;			0.33910891089108913	6	1	46097730	46114436	0.8998125105966358	6_46112389_A_G	1.7630579504950494
ENSG00000002330	ENSG00000002330	Q92934	11_64031798_G_C	rs589030	0.003184248322872085	0.0007283180642505037	1.0	1.7513191576981368e-07	-0.32307415765352976	5.232638660566341e-05	-0.3356060151524193	0.4930698710554642	-0.13468136646588968	0.2614315741638921	-0.124518534427694	114	340636.1183283005	0.1653796243993195	2	0.30480318248024585	False	64031798								0.30445544554455445	11	-1	64037302	64052176			3.15282448019802
ENSG00000002549	ENSG00000002549	P28838	4_17546812_A_C	rs4698607	0.01839084911299837	0.005407680319776648	1.0	8.244848722493802e-06	0.2596665980548969	0.2486362129987239	0.19102353060308544	0.021128123729439605	0.301409254819341	0.003952394466310518	0.2653079480663445	202	38996132.35664921	0.24410165593126576	27	0.21319680037193728	False	17546812,17546738								0.4504950495049505	4	1	17578815	17609595			4.005346084158416
ENSG00000003147	ENSG00000003147	E9PDL4	7_8299751_A_G	rs11973424	0.00019816456707247052	3.3332843600976264e-05	1.0	1.489482796121629e-07	-0.7021826129925358	0.0028501240438548354	-0.5265013752061297	0.005560870057198097	-0.5204427171397121	0.0013320287662626925	-0.5608238139592627	202	2801748.5060041896	0.12850316536182005	11	0.17465440025409787	False	8299751					7_8299751_A_G;	7_8299751_A_G;		0.06930693069306931	7	-1	8152814	8302317			2.8883674059405937
ENSG00000003249	ENSG00000003249	Q9H9R9-2	16_89933324_T_G	rs55749251	0.08969216675475797	0.035972992585568235	1.0	2.414915682979865e-05	-0.34885185546903524	0.0004179815763298879	-0.3497949925684585	0.1595160473796625	-0.2705233094313646	0.0861483066638085	-0.3125156443399044	88	727575.6272652005	0.30353731005711165	1	0.2418647237349287	False	89933324								0.14108910891089108	16	-1	90071273	90086536			4.483882193069307
ENSG00000003393	ENSG00000003393	Q96Q42	2_202621002_T_C	rs10211223	0.004786768484297997	0.0011620926883336119	1.0	6.881767860496216e-07	-0.4208686026739644	0.0010550971240447591	-0.4793904557941196	0.6695145406743409	-0.7567038280504959	0.13556735584363058	-0.19348032243801336	202	8298399.976365107	0.11001560429176464	38	0.1437859428460284	False	202621002,202621624,202633725,202639198,202645961,202648208,202651129		2_202633725_T_TA;2_202633725_TA_T;2_202621624_AT_A;			2_202639198_A_G;2_202633725_T_TA;2_202633725_TA_T;2_202621624_AT_A;2_202621002_T_C;			0.13613861386138615	2	-1	202565277	202645912			3.1017429001239205
ENSG00000003509	ENSG00000003509	Q7L592	2_37422076_C_T	rs149381909	0.0063271345898907715	0.0015930781344791116	1.0	1.7724364803772843e-06	-0.3656522661099824	2.658098553368008e-13	-0.6072877730418167	1.341797710965365e-07	-0.44836225615143777	2.6822811485986248e-05	-0.35337278988177	202	15814019.39233868	0.15905205061027286	19	0.10018225589321376	False	37422076								0.3886138613861386	2	1	37458774	37480546	0.523183628267257	2_37480249_A_G	3.8205687693358485
ENSG00000003987	ENSG00000003987	Q9Y216	8_17266143_C_T	rs12548066	0.010154133763812198	0.002731382346861809	1.0	4.2456432780597844e-07	-0.387259644228938	4.1238302390301866e-05	-0.2684705097467565	0.6755781553638842	-0.07493394292308464	0.9293790700331159	0.00805685591231664	139	412948.7489692704	0.22484546507313866	1	0.4516249634118016	False	17266143,17266900,17267528,17267569,17267656,17267851,17267884,17268058,17270289,17270502,17270764					8_17270764_C_A;8_17270502_T_C;8_17270289_C_T;8_17268058_C_G;8_17267884_A_C;8_17267851_T_A;8_17267656_A_T;8_17267569_C_T;8_17267528_T_C;8_17266900_T_C;8_17266143_C_T;	8_17270764_C_A;8_17270502_T_C;8_17270289_C_T;8_17268058_C_G;8_17267884_A_C;8_17267851_T_A;8_17267656_A_T;8_17267569_C_T;8_17267528_T_C;8_17266900_T_C;8_17266143_C_T;		0.3415841584158416	8	-1	17155539	17271037			1.665361108910891
ENSG00000004059	ENSG00000004059	P84085	7_127082497_G_A	rs4731365	0.01823970263463093	0.005346156548883981	1.0	3.5119758852914555e-05	-0.18559873726054268	0.0014242535337431188	-0.1962588746057304	0.030721938972643588	-0.2051065031631918	0.3987593168464262	-0.06323034839543329	202	11649885.91156278	0.16130530992340467	7	0.19721204688770533	False	127082497,127082952,127083129,127086507,127090552,127102681,127104234,127114139,127130001,127147628,127148632								0.4628712871287129	7	1	127228399	127231759			5.7867726782178215
ENSG00000004399	ENSG00000004399	Q9Y4D7	3_129275206_C_T	rs11920311	0.001494883509937493	0.00030989566851215034	1.0	4.6460619793392147e-08	-0.4981075860179376	8.979890761569125e-06	-0.3860570824582785	0.009327934055134879	-0.6655879318641427	0.2030883446468505	-0.1892111994916048	202	2057480.234671552	0.21101876580340875	13	0.44096946434395945	True	129275206,129273315,129274363,129274456,129274655,129274814,129274936,129275403,129275619,129276330,129276412,129277146,129277481,129277992,129278182,129278446,129279570,129280261,129280944,129281438,129288128		3_129278446_GCCCCCCCA_G;3_129278446_GC_G;3_129274243_GGGCGCTCTGCCAGGTCTGCCCGCTCTCTGGAACAGTCATTTCCAGTGTTGCATGGGGAGCCTCTCGGGACCCCTCCCCGGGTCCTCTGCGCAAGCGGCAGCTATTCACAGTTGGTGCATGATACGTTTTTTAATATATAAAAGCTTTAAAAAAAAAAGTGGTGCTATCTTTAGAAACACTTTCAGCAAGATCAAGTAGCCCAGCTACAGCCTCGGTGCATCTTAACCCCTCTCCTTTTCCTGGAGACGGGGCTCCCAGCTCCTGTGCCCCCCATCCCTCCCCTCCACCCTCCCTGCTCCTGGAGAAGCCCACAGAGCACCCCATGGCGCGGGCACTGCCCACTCT…	3_129279570_T_C;3_129278446_GCCCCCCCA_G;3_129274243_GGGCGCTCTGCCAGGTCTGCCCGCTCTCTGGAACAGTCATTTCCAGTGTTGCATGGGGAGCCTCTCGGGACCCCTCCCCGGGTCCTCTGCGCAAGCGGCAGCTATTCACAGTTGGTGCATGATACGTTTTTTAATATATAAAAGCTTTAAAAAAAAAAGTGGTGCTATCTTTAGAAACACTTTCAGCAAGATCAAGTAGCCCAGCTACAGCCTCGGTGCATCTTAACCCCTCTCCTTTTCCTGGAGACGGGGCTCCCAGCTCCTGTGCCCCCCATCCCTCCCCTCCACCCTCCCTGCTCCTGGAGAAGCCCACAGAGCACCCCATGGCGCGGGCACTGCCCACTCTA…	3_129274936_A_G;3_129274814_G_A;3_129274655_C_T;3_129274456_C_T;3_129274243_GGGCGCTCTGCCAGGTCTGCCCGCTCTCTGGAACAGTCATTTCCAGTGTTGCATGGGGAGCCTCTCGGGACCCCTCCCCGGGTCCTCTGCGCAAGCGGCAGCTATTCACAGTTGGTGCATGATACGTTTTTTAATATATAAAAGCTTTAAAAAAAAAAGTGGTGCTATCTTTAGAAACACTTTCAGCAAGATCAAGTAGCCCAGCTACAGCCTCGGTGCATCTTAACCCCTCTCCTTTTCCTGGAGACGGGGCTCCCAGCTCCTGTGCCCCCCATCCCTCCCCTCCACCCTCCCTGCTCCTGGAGAAGCCCACAGAGCACCCC…	3_129288128_G_A;3_129281438_C_T;3_129280944_C_T;3_129280261_C_T;3_129279570_T_C;3_129278446_GCCCCCCCA_G;3_129278446_GC_G;3_129278182_A_G;3_129277992_C_T;3_129277481_T_C;3_129277146_A_C;3_129276412_T_C;3_129275619_T_C;3_129275403_C_A;3_129274936_A_G;3_129274814_G_A;3_129274655_C_T;3_129274456_C_T;3_129274243_GGGCGCTCTGCCAGGTCTGCCCGCTCTCTGGAACAGTCATTTCCAGTGTTGCATGGGGAGCCTCTCGGGACCCCTCCCCGGGTCCTCTGC…	3_129281438_C_T;3_129280944_C_T;3_129280261_C_T;3_129279570_T_C;3_129278446_GCCCCCCCA_G;3_129278446_GC_G;3_129278182_A_G;3_129277992_C_T;3_129277481_T_C;3_129277146_A_C;3_129276412_T_C;3_129275619_T_C;3_129275403_C_A;3_129274936_A_G;3_129274814_G_A;3_129274655_C_T;3_129274456_C_T;3_129274243_GGGCGCTCTGCCAGGTCTGCCCGCTCTCTGGAACAGTCATTTCCAGTGTTGCATGGGGAGCCTCTCGGGACCCCTCCCCGGGTCCTCTGCGCAAGCGGCAGCTATT…	3_129274363_G_A;3_129275206_C_T;	0.12871287128712872	3	-1	129274018	129325661			3.2970314830961938
ENSG00000004534	ENSG00000004534	P78332	3_50088266_T_C	rs2624824	1.4154059282307449e-09	8.830754532915688e-11	1.0	4.0749211182331335e-16	0.5093704826943694	8.575580345234678e-08	0.4312048597645832	1.5528302728093717	0.13808220943127306	0.6950069898563248	0.02567281130330201	202	17646734.390987117	0.1363496658154207	25	0.2246707312303997	False	50088266,49897830,49898000,49898273,49902544,49907111,49910084,49915506,49916018,49916044,49920571,49924424,49924940,49930215,49931343,49936102,49936910,49939587,49941436,49949834,49951316,49959570,49960388,49968572,49971514,49971887,49972101,49972415,49975334,49975654,49978069,49979531,49986118,49989155,49989935,49990497,49990655,49992778,49993191,49993319,49995268,49995518,49996012,49997064,499…		3_50135699_ATTTTTATT_A;3_50131459_AT_A;3_50131458_TA_T;3_50118454_GT_G;3_50111279_C_CT;3_50111279_CT_C;3_50065497_GT_G;3_50053937_GT_G;3_50037202_GA_G;3_50032699_TA_T;3_49996011_ACA_A;3_49993318_TA_TGTG;3_49992778_AT_A;3_49989935_GT_G;		3_49978069_C_T;	3_50135699_ATTTTTATT_A;3_50131459_AT_A;3_50131458_TA_T;3_50129399_C_T;3_50128893_A_G;3_50128386_G_A;3_50125996_G_A;3_50123417_A_G;3_50118748_T_C;3_50118454_GT_G;3_50117312_T_G;3_50115245_G_A;3_50113034_A_G;3_50111279_C_CT;3_50111279_CT_C;3_50109073_A_T;3_50107512_G_A;3_50097319_C_A;3_50092226_G_A;3_50089690_G_T;3_50080439_A_G;3_50078541_C_T;3_50077804_G_A;3_50073046_C_T;3_50070763_A_C;3_50069452_…	3_50135699_ATTTTTATT_A;3_50131459_AT_A;3_50131458_TA_T;3_50129399_C_T;3_50128893_A_G;3_50128386_G_A;3_50125996_G_A;3_50123417_A_G;3_50118748_T_C;3_50118454_GT_G;3_50117312_T_G;3_50115245_G_A;3_50113034_A_G;3_50111279_C_CT;3_50111279_CT_C;3_50109073_A_T;3_50107512_G_A;3_50097319_C_A;3_50092226_G_A;3_50089690_G_T;3_50080439_A_G;3_50078541_C_T;3_50077804_G_A;3_50073046_C_T;3_50070763_A_C;3_50069452_…		0.4975247524752475	3	1	49977440	50137478			3.917243580536806
ENSG00000004700	ENSG00000004700	P46063	12_21674602_T_C	rs4140763	0.0030607856274477052	0.000696137946170068	1.0	9.092550020604923e-07	0.7212749957200806	0.04633234414111848	0.35741565272774706	0.042990436597974635	0.4826539454760721	0.0258305341984413	0.3764756580651494	202	37609217.65776127	0.1003878589227898	29	0.11712683337688545	False	21674602,21663784,21664401,21664879,21665877,21669650,21669819,21669855,21671107,21671566,21672022,21672955,21673089								0.08663366336633663	12	-1	21621845	21654603			4.1869119306930696
ENSG00000005059	ENSG00000005059	Q9NWR8	4_110472254_A_G	rs6821051	0.087306175159515	0.03478757113929405	1.0	0.0002800425081219627	0.416377163027676	0.05415014027296252	0.32786610933757265	0.1905625222967405	0.6535751091931066	0.24903393221879505	0.2259015864848044	193	1226266.6718958998	0.22572143018404164	5	0.19531069774886006	True	110472254,110314408,110316961,110317280,110321233,110323058,110324113,110324211,110324528,110325309,110325349,110326830,110327632,110328184,110328837,110329084,110329130,110329521,110329550,110329640,110330060,110330903,110331036,110332506,110333051,110333149,110333518,110333822,110334582,110334770,110334968,110335847,110335870,110336998,110337039,110337126,110337429,110338309,110338621,110340134…		4_110490352_G_GA;			4_110497064_C_G;4_110496506_A_G;4_110493384_C_G;4_110490352_G_GA;4_110489662_G_A;4_110487028_C_T;4_110486659_G_A;4_110485625_C_T;4_110484343_T_C;			0.06930693069306931	4	1	110481361	110609874			2.100384722772277
ENSG00000005100	ENSG00000005100	Q9H6R0	17_5378934_C_T	rs56968592	0.028182235799856174	0.008930037727989075	1.0	1.7657493390849887e-07	0.3217922007488135	4.06225813221929e-07	0.27938188803380465	8.101700991537894e-07	0.20562938295635536	0.2393160792988337	-0.12292617642804647	202	9456928.14592823	0.2637730318653761	24	0.1724888753999085	False	5378934,5372259,5382202,5385398,5394204,5394248,5394330,5394745,5395334,5395477,5395883,5396314,5396697,5396735,5397277,5397401				17_5372259_G_A;				0.20544554455445546	17	-1	5344232	5372380			4.370624396039605
ENSG00000005156	ENSG00000005156	P49916	17_33349270_G_T	rs2240074	4.074640491937496e-07	4.039822657931709e-08	1.0	4.741490139253608e-11	0.4980738430425	1.1437786280282862e-06	0.4492553545633737	0.3717929267847547	0.4169120204802357	0.0061756494558938575	0.3478350030690862	202	53690759.56849631	0.0953525897615744	39	0.1111070773511263	True	33349270,33298193,33308221,33313311,33315445,33318312,33326017,33326780,33329648,33332655,33332962,33334112,33337411,33338447,33339283,33342022,33342781,33347512,33354526,33358804,33365029,33367694,33368608,33379667,33379791,33390169,33392687,33398340,33401455,33402980,33404842,33406488,33410850,33411994,33412183,33415394,33418379,33424215,33428487,33429765,33432771					17_33329648_G_A;17_33326780_G_A;17_33326017_C_G;17_33318312_T_G;17_33315445_G_A;17_33313311_G_A;17_33308221_G_T;	17_33315445_G_A;17_33313311_G_A;		0.10643564356435643	17	1	33307513	33332083			3.91315952970297
ENSG00000005194	ENSG00000005194	Q6FI81	16_57515188_C_G	rs623685	0.034759649937250225	0.011421085962057988	1.0	1.1762826262745852e-05	-0.16243410306874012	0.05519717485050097	-0.2451168729754788	0.4733376260376127	-0.298310340685223	0.0964742556640254	-0.11307700946618038	202	32600161.057544786	0.1221892128507742	19	0.14868820310746642	False	57515188,57515369,57517056								0.349009900990099	16	-1	57462081	57481440			4.435606742574258
ENSG00000005436	ENSG00000005436	P16383	2_75881264_G_T	rs7592795	3.3782395602039184e-08	2.688988529718675e-09	1.0	1.2078811677596778e-13	0.6426946720742873	9.978102767456842e-16	0.4937935777460911	4.193154688689353e-07	0.7758467818628331	1.098701346825063e-07	0.5003200497968942	202	2688747.917477224	0.25282726583819193	11	0.22344405224953395	False	75881264,75857892,75859919,75860271,75861744,75862484,75862704,75863450,75878618,75880366,75880374,75881828,75882576,75883390,75883878,75884988,75886066,75886643,75887579,75887834,75888096,75888160,75890408,75890540,75892319,75895978,75903170,75903864,75905719,75911977,75911985,75913517,75914063,75915035,75917612,75918070,75919500,75921232,75928300,75929130,75929238,75930048,75931589,75931600,759…		2_75934688_TA_T;2_75921232_G_GCTTA;2_75919500_AG_A;2_75891914_AAAACAAAACAAATTTCTCCCTTTAAAAATGCAATGTATGAGGGAACAGCGGTCAATTCAGAACCTGATCATCAGTTGTTAATCTAAAACAAAAGCTTTACCTTAAGCCAATATCTAAAGTAGCATAAAACACAGAGAGATGCTGCCATCTCCACTTAATTATAAAGTTCAAATACAGATCATTAGTGGATGTATTCTGGCAAATTTCAATGTGAATTACTGTAAAAGGTAGAAAAGCATATAGTAAGTCTATCAGAAATTTCAGTAGTGCTGCGTTGCTATTAGCTTGTATGAGACATTGTGGTGGAAGCAATGGTGGGAGTATATTCACACATCA…	2_75891914_AAAACAAAACAAATTTCTCCCTTTAAAAATGCAATGTATGAGGGAACAGCGGTCAATTCAGAACCTGATCATCAGTTGTTAATCTAAAACAAAAGCTTTACCTTAAGCCAATATCTAAAGTAGCATAAAACACAGAGAGATGCTGCCATCTCCACTTAATTATAAAGTTCAAATACAGATCATTAGTGGATGTATTCTGGCAAATTTCAATGTGAATTACTGTAAAAGGTAGAAAAGCATATAGTAAGTCTATCAGAAATTTCAGTAGTGCTGCGTTGCTATTAGCTTGTATGAGACATTGTGGTGGAAGCAATGGTGGGAGTATATTCACACATCATGACATTAGCAAATAATACAAATCTGATTTTTTTTTTTTTTAAAGGGACTT…	2_75929238_C_A;2_75929130_C_A;2_75915035_C_T;2_75891914_AAAACAAAACAAATTTCTCCCTTTAAAAATGCAATGTATGAGGGAACAGCGGTCAATTCAGAACCTGATCATCAGTTGTTAATCTAAAACAAAAGCTTTACCTTAAGCCAATATCTAAAGTAGCATAAAACACAGAGAGATGCTGCCATCTCCACTTAATTATAAAGTTCAAATACAGATCATTAGTGGATGTATTCTGGCAAATTTCAATGTGAATTACTGTAAAAGGTAGAAAAGCATATAGTAAGTCTATCAGAAATTTCAGTAGTGCTGCGTTGCTATTAGCTTGTATGAGACATTGTGGTGGAAGCAATGGTGGGAGTATATTCACACATCATGACAT…	2_75936976_C_G;2_75936935_T_A;2_75935894_T_C;2_75935614_A_T;2_75935038_C_G;2_75934688_T_A;2_75934688_TA_T;2_75933830_T_A;2_75932846_C_T;2_75931600_T_G;2_75931589_T_A;2_75930048_C_G;2_75929238_C_A;2_75929130_C_A;2_75928300_G_T;2_75921232_G_GCTTA;2_75919500_AG_A;2_75919500_A_C;2_75918070_T_G;2_75917612_G_A;2_75913517_C_G;2_75911985_T_C;2_75911977_G_A;2_75905719_C_T;2_75903864_T_C;2_75903170_A_G;2_7…		2_75915035_C_T;	0.36386138613861385	2	-1	75879126	75938115	1.0	2_75881264_G_T	2.3095237100431714
ENSG00000005801	ENSG00000005801	A0A087WT67	11_3392364_G_A	rs79807062	0.002532602444210963	0.0005605936113780792	1.0	1.57704704197599e-07	-0.566747711445814	0.0002853282425770015	-0.7414381903062358	0.048073393504251716	-0.8481330304939817	0.0048070807305775655	-0.6006430314329776	202	2130774.206532888	0.2253799483448071	10	0.20378273222793444	False	3392364,3400133,3405254					11_3400133_C_T;11_3392364_G_A;	11_3400133_C_T;11_3392364_G_A;		0.054455445544554455	11	-1	3360491	3400448			3.8631474851485152
ENSG00000005812	ENSG00000005812	C9J0Y7	13_77569672_T_C	rs9573972	7.437120313510334e-07	7.660852014384986e-08	1.0	8.572855777084134e-12	0.9508683353896812	6.670138876572878e-09	0.7125042431302031			0.7638435171075011	0.07208262827776846	97	462855.6492888617	0.18396035577605926	2	0.281319924887185	False	77569672,77576383,77580732,77582519,77582708,77584408,77584428,77585432,77585992,77586425,77587240,77587949,77588491,77588579,77589256,77591227,77594515,77594925,77595490,77596182,77596831,77597029,77597080,77598252				13_77580732_T_C;	13_77598252_T_A;13_77597080_T_G;13_77597029_A_T;13_77596831_C_T;13_77596182_T_G;13_77595490_A_T;13_77594925_T_G;13_77594515_A_G;13_77591227_T_C;13_77589256_A_G;13_77588579_C_T;13_77588491_A_G;13_77587949_G_A;13_77587240_C_T;13_77586425_C_T;13_77585992_C_A;13_77585432_T_C;13_77584428_T_C;13_77584408_C_G;13_77582708_C_G;13_77582519_C_T;			0.06930693069306931	13	-1	77566740	77601330			2.2515004455445546
ENSG00000005882	ENSG00000005882	Q15119	17_48168630_A_G	rs7218591	0.004888057752055888	0.001191114561199377	1.0	4.670593185157853e-07	-0.27661166130206005	1.7915897906485378e-05	-0.50589550221074	0.03309537832001573	-0.2622565085408595	0.20810701873058424	-0.1139741349240916	202	2323986.2386659654	0.1946651301345937	6	0.4022097430651025	False	48168630								0.3564356435643564	17	1	48172101	48189516			2.2330251039603963
ENSG00000005884	ENSG00000005884	P26006-1	17_48131632_T_C	rs57066151	0.0015864312273269506	0.00033110229173872796	1.0	6.634912189448625e-07	-0.5329757238001189	8.626419368817151e-05	-0.5518001656797356	0.00010278598621844172	-1.1194887070392368	0.07013210707936589	-0.26129825979289034	202	3405001.516790028	0.2797044182382151	10	0.2576860629525149	True	48131632,48131195,48131460,48131919,48132643,48132713,48132727,48132763,48133313,48137168,48142693,48142975,48144214,48145094,48151353,48153924,48158843				17_48151353_T_C;	17_48158843_G_C;17_48153924_T_C;17_48145094_C_T;17_48144214_T_C;17_48142975_C_T;17_48142693_A_G;17_48137168_C_T;	17_48153924_T_C;17_48151353_T_C;17_48145094_C_T;17_48144214_T_C;17_48142975_C_T;17_48142693_A_G;17_48137168_C_T;	17_48151353_T_C;	0.11386138613861388	17	1	48133332	48167845			2.342500896039604
ENSG00000005955	ENSG00000005955	Q9H3C7	17_34942595_G_A	rs1106908	9.467863338349042e-05	1.5127746057411265e-05	1.0	5.773849592502442e-09	0.28508438435360245	2.2019037332264645e-32	1.058123294418614	0.12192566914343544	0.4087549905514181	0.5923439197005897	0.05850690921538236	176	467794.3475895457	0.347643276235275	5	0.2801691148814189	False	34942595,34835526,34840664,34841617,34843839,34844505,34844756,34853019,34853103,34854280,34855348,34865131,34866546,34868226,34873031,34873697,34876195,34876866,34882998,34884149,34890362,34895455,34898722,34900120,34900642,34900847,34904985,34905455,34907050,34908219,34908378,34910357,34913528,34913982,34914149,34914365,34914601,34914787,34916879,34917608,34918092,34919623,34919643,34924538,349…	17_34943719_C_T;	17_34945033_TA_T;17_34941382_CA_C;17_34914601_CT_C;17_34908378_TATAA_T;17_34907050_CT_C;17_34905455_C_CACAT;17_34942594_AG_A;		17_34900847_A_C;	17_34945034_A_T;17_34945033_TA_T;17_34944593_G_A;17_34943719_C_T;17_34941382_CA_C;17_34941376_C_T;17_34938599_G_A;17_34938437_G_A;17_34935878_C_A;17_34932498_C_G;17_34929379_A_G;17_34929002_G_A;17_34928562_C_T;17_34924538_T_C;17_34919643_C_G;17_34919623_C_T;17_34918092_T_C;17_34917608_T_C;17_34916879_T_C;17_34914787_T_C;17_34914601_CT_C;17_34914365_A_G;17_34914149_A_G;17_34913982_G_A;17_34913528_…		17_34942595_G_A;	0.4331683168316832	17	1	34900737	34946278			2.715202683168317
ENSG00000006007	ENSG00000006007	Q9NZC3	16_19512962_C_T	rs916076	1.1084513471420081e-31	1.2974966020625163e-34	1.0	2.4636708686549796e-37	-1.189123024546062	3.160866539734188e-29	-1.1384354948249382	0.007635903727598686	-0.3883393782274762	0.058273820585004764	-0.21864977740427705	202	2019286.9430920887	0.1580831279489683	6	0.20579279845893486	False	19512962,19484893,19497458,19497948,19500680,19503048,19503770,19505205,19509333,19509600,19509938,19512819,19514141,19516705,19518370,19521194,19521671,19525562,19525829,19526763,19527076,19529203,19531828,19534925,19535692,19541025,19542862,19543981,19546594,19546926,19548116,19548290,19549306,19550161,19550446,19550602,19551716,19553059,19554960,19556258,19556930,19557490,19557564,19557844,195…		16_19518370_AG_A;		16_19514141_A_G;	16_19531828_T_C;16_19529203_A_T;16_19527076_G_A;16_19526763_T_C;16_19525829_T_G;16_19525562_G_A;16_19521671_A_C;16_19521194_G_C;16_19518370_AG_A;16_19516705_T_C;	16_19531828_T_C;16_19529203_A_T;16_19527076_G_A;16_19526763_T_C;16_19525829_T_G;16_19525562_G_A;16_19521671_A_C;16_19521194_G_C;16_19518370_AG_A;16_19516705_T_C;16_19514141_A_G;		0.1707920792079208	16	-1	19513015	19533467			4.274021123762376
ENSG00000006015	ENSG00000006015	Q96EN9	19_18721314_G_A	rs3761032	1.932131088784668e-07	1.7980150012686536e-08	1.0	1.8830977150009988e-10	0.3067340108251553	0.0007986117228209075	0.2631571986918753	0.3937313856684308	-0.12320414571365608	0.7697227509985579	0.03465964272077482	118	258578.3442555491	0.3684324768687633	1	0.32003695951419225	False	18721314,18703077,18703424,18703503,18703773,18704528,18707973,18708011,18711203,18716206,18719730,18720981,18723325,18725835,18731658,18732325,18734828,18736899,18741608,18742830,18743962				19_18703077_T_C;		19_18703077_T_C;		0.4678217821782178	19	1	18699495	18703146			3.162429816831683
ENSG00000006047	ENSG00000006047	Q9Y2T7	17_7184046_G_A	rs5412	0.004865567338160275	0.0011840705251123975	1.0	2.2463771254080577e-08	0.4822217872253226	3.1343950964135287e-06	0.42828762728050135	0.5886285719304221	0.27312506511998713	0.03256544987026954	0.2624736358459535	192	2100826.3667055746	0.2421878772348653	6	0.3286079276391765	False	7184046,7166254								0.16584158415841585	17	-1	7191571	7197934	0.051260051864051255	17_7197794_C_A	2.9087653168316834
ENSG00000006114	ENSG00000006114	Q9UMZ2-5	17_35899141_T_A	rs1034686	1.6079963967013668e-07	1.4775572649076122e-08	1.0	1.7390792901677047e-14	0.3926600543746741	7.842199782703512e-09	0.4308464516703049	0.1104170618463528	0.4017164877217483	0.00792240403467168	0.15781246653974268	202	7496795.415926895	0.11152604163941944	30	0.09389534660110406	False	35899141,35884583,35898782,35899687,35899934					17_35899934_G_A;17_35899687_T_G;17_35898782_T_C;17_35884583_G_A;17_35899141_T_A;			0.4306930693069307	17	-1	35874900	35969544			2.5819527128712876
ENSG00000006125	ENSG00000006125	P63010	17_33867369_A_C	rs11654357	0.009474381427840337	0.0025230267761133986	1.0	4.674188172606456e-05	-0.14311818414345745	0.0027584385698802088	-0.21178297780172425	0.3107004748302051	-0.2949094058678977	0.015021177822173453	-0.3369086678285487	202	52384806.59508058	0.08072080422034884	25	0.0897284186679823	True	33867369,33864479								0.4603960396039604	17	1	33905065	34053436			5.729455866336634
ENSG00000006194	ENSG00000006194	O14978	16_3375399_A_G	rs2360762	0.0071529122283941786	0.0018403489497846664	1.0	3.398146538472843e-06	0.4312291791845679	0.0014262166643374122	0.3112161949092543	0.17870903755580314	0.3343710621384093	0.9059984174684054	0.017182918851506024	104	313008.0659227189	0.25090421989336736	1	0.32256985665801924	False	3375399,3313025,3316340,3317036,3317948,3321526,3322450,3323569,3326038,3326825,3328159,3328518,3330179,3333391,3333549,3336561,3337235,3337452,3337894,3338343,3339435,3340845,3346229,3346798,3347033,3348171,3350639,3353205,3355565,3356441,3357015,3357694,3359124,3360140,3361639,3362017,3362323,3362609,3362632,3364867,3364997,3365733,3366513,3367061,3367229	16_3339435_G_C;	16_3336885_ACAAGACTGTGTGTACATTATGATTATACCTATGTTGAAACACACCAGTAGAAAGACTCACTGGTGTGGTGGTGGTAGTCCCAGTTACTCAGGAGGCTGAGGGGAGAATCACCTGAGCCCAGTAGGTCAAGGCTGCAGTGAGCTATGATGATGCCACTGCACCTCAACCAGGTGACAGAGTGAGACTCTGTTTCAAAACAAACAAGACACACCGCACATTGTTTCCATATATCAGGTTTGCCTAAAAAGTATCACAACTGTACATTTGTTGACACTAATTCTGCAAACGCAATCTTGCTCACTGCAACCTCTGCCTCCCGGGTTCAAGTGATTCTCCTGCCTCAGCCTCCAGAGTAGCTGGGATTACAGGCATGCGCCACCACACCCG…		16_3340845_C_T;16_3339435_G_C;16_3336561_C_T;16_3333549_CTA_C;16_3333391_C_T;	16_3338343_G_C;16_3337894_C_T;16_3336885_ACAAGACTGTGTGTACATTATGATTATACCTATGTTGAAACACACCAGTAGAAAGACTCACTGGTGTGGTGGTGGTAGTCCCAGTTACTCAGGAGGCTGAGGGGAGAATCACCTGAGCCCAGTAGGTCAAGGCTGCAGTGAGCTATGATGATGCCACTGCACCTCAACCAGGTGACAGAGTGAGACTCTGTTTCAAAACAAACAAGACACACCGCACATTGTTTCCATATATCAGGTTTGCCTAAAAAGTATCACAACTGTACATTTGTTGACACTAATTCTGCAAACGCAATCTTGCTCACTGCAACCTCTGCCTCCCGGGTTCAAGTGATTCTCCTGCCTCAGCCTCCAGAGTAGC…			0.2227722772277228	16	1	3313743	3351401			2.3815238366336633
ENSG00000006282	ENSG00000006282	A0A0U1RRL8	17_48615329_G_A	rs2306001	1.991930953490264e-23	1.1658263803641953e-25	1.0	1.5239792125774945e-32	-1.4881885087307305	1.4643664825178848e-42	-1.5562416261683871	4.9447545496628096e-14	-1.678412591564972	2.7880523510555338e-14	-1.0516560253586744	202	1105529.5708177346	0.2566008814642582	7	0.2322420357056056	False	48615329,48611993,48612315,48612433,48619272,48619290,48624045,48625223,48625307		17_48625307_GGGGGAGGGGCCT_G;			17_48625307_GGGGGAGGGGCCT_G;17_48625223_C_T;			0.12376237623762375	17	1	48620419	48633213	0.9999999999999998	17_48615329_G_A	2.580875415841584
ENSG00000006453	ENSG00000006453	Q9UHR4	7_98027580_C_T	rs1541409	5.935665919217881e-10	3.4948378290607445e-11	1.0	4.7190447348205766e-17	-0.7351397358090807	1.7915599072879486e-13	-0.5955701178981131	1.3643782892886925e-07	-0.6429737247265759	0.002423630888672283	-0.3147122739293271	202	11867235.65416805	0.17411449857773326	16	0.1775891026639046	False	98027580,97914305,97917910,97924226,97929183,97938443,97938618,97947055,97956758,97960146,97960800,97965821,97967685,97974555,97984077,97988428,97996593,97997164,97998124,98005766,98009224,98013839,98014041,98015435,98015868,98017099,98017192,98017730,98026554,98030349,98030513		7_98026554_ACT_A;7_98017192_AAAC_A;7_97967685_G_GTTGCGCCA;7_97960146_CCT_C;		7_98030349_G_C;	7_98026554_ACT_A;7_98017730_G_A;7_98017192_AAAC_A;7_98017099_G_A;7_98015868_G_A;7_98015435_C_T;7_98014041_G_A;7_98013839_G_A;7_98009224_G_A;7_98005766_C_T;7_97998124_T_A;7_97997164_G_C;7_97996593_T_C;7_97988428_G_A;7_97984077_C_T;7_97974555_C_T;7_97967685_G_GTTGCGCCA;7_97965821_G_C;7_97960800_G_A;7_97960146_CCT_C;7_97956758_G_A;7_97947055_G_C;7_97938618_C_T;7_97938443_G_A;7_97929183_T_C;7_9792422…			0.19801980198019808	7	-1	97920963	98030380			3.81648549009901
ENSG00000006652	ENSG00000006652	O00458-2	7_112091637_T_G	rs7793697	0.060447480624096564	0.022069026345143062	1.0	9.297637897907006e-05	-0.3709362105414618	4.034007021118321e-08	-0.7300925716569282	0.12912920787305718	-0.33740114611815303	0.7907029904703798	-0.04455756169559311	181	749578.1389312312	0.3447931803502101	4	0.3892295667867462	False	112091637,112092254,112095549,112098271,112101219,112102734,112102890,112104514,112109331,112110002,112116659		7_112110002_CT_C;7_112102890_TA_T;7_112101219_GATTA_G;7_112095549_AAAAAC_A;		7_112098271_T_C;7_112092254_G_A;	7_112116659_T_C;7_112110002_CT_C;7_112109331_A_G;7_112104514_G_A;7_112102890_TA_T;7_112102734_A_G;7_112101219_GATTA_G;7_112098271_T_C;7_112095549_AAAAAC_A;7_112092254_G_A;7_112091637_T_G;			0.1485148514851485	7	1	112063023	112121072			2.784557326732673
ENSG00000006695	ENSG00000006695	J3KSJ3	17_14318322_G_A	rs34576778	0.0077675625383569185	0.002013947210869785	1.0	1.891246389243588e-05	0.23879676170394976	0.0001834066787130466	0.2712028660410818	0.015450008893217869	0.28417717960930355	0.0457435604124417	0.21984482790741788	146	213636.9854781449	0.2660889976835155	1	0.2567286151620641	False	14318322,14321095,14321452,14323373,14326088,14326710,14336219								0.4603960396039604	17	1	13972813	14111994			3.2290287821782178
ENSG00000006744	ENSG00000006744	Q9BQ52	17_12895815_C_T	rs2523	0.0015880936162644098	0.00033163514121686843	1.0	4.138154759320526e-07	0.26449144687359616	3.491779704542207e-08	0.3302186789164433	0.12265487625609482	0.2341449121362369	0.031196700479592686	0.16954896368287753	202	37844834.371013016	0.09281797362118256	34	0.10169892181822784	False	12895815,12895674,12895929,12895984,12896553,12897293,12913490,12914484		17_12896547_GCTCCCCAGGC_G;		17_12895984_G_C;17_12895929_G_A;17_12895815_C_T;	17_12914484_T_C;17_12913490_C_T;17_12897293_A_C;17_12896553_C_T;17_12896547_GCTCCCCAGGC_G;			0.3564356435643564	17	-1	12895708	12921504			4.377305613861386
ENSG00000007080	ENSG00000007080	Q96CT7	19_18038782_A_G	rs17654474	0.0914628806134103	0.03693631489128709	1.0	6.889390566780397e-05	0.1954267058719696	0.008179454172072201	0.21754236289576367	1.1544283164257856	0.1792099402216798	0.3001541300831239	0.08592625432416033	202	26738781.94291979	0.11130723740847703	16	0.14294517111716826	False	18038782,18038881,18038897,18039140,18039765,18041136,18041229,18041309,18041334,18042432								0.4108910891089109	19	1	18043825	18054800			5.198033861386139
ENSG00000007541	ENSG00000007541	Q9BRB3-2	16_675067_C_A	rs62623587	0.008401359901974359	0.002198927863843459	1.0	4.320681696401325e-07	-0.3519460222008618	2.2315849785050986e-09	-0.6402083441031565	0.03967286792287842	-1.2574439348755613	0.024951674147490884	-0.5238864975414637	148	355641.4154269486	0.3888339549546196	2	0.682206734194023	True	675067								0.08663366336633663	16	1	616995	634136			2.219389584158416
ENSG00000007866	ENSG00000007866	Q99594	6_35449326_C_T		0.04864823085905565	0.017123402808519296	1.0	6.0627046559214025e-05	-0.33499486552302576	0.0032458979833152714	-0.3326380472283052	0.12778916802049814	-0.4693648768946078	0.4143246819063282	-0.10994621227620473	202	3707839.4765189337	0.14230713615178409	10	0.21303881010793696	False	35449326,35432171,35439784,35441167,35442397,35451187				6_35442397_A_G;	6_35451187_C_T;6_35449326_C_T;			0.10891089108910892	6	-1	35441374	35464853			4.320416608910891
ENSG00000008277	ENSG00000008277	Q9P0K1-2	7_87585759_G_T	rs34221278	0.03662688670858072	0.012210391355031944	1.0	1.1100206326307692e-05	0.20588301278528714	0.02997156955445213	0.19675015604424653	0.20678465192899734	0.2943423883607963	0.4826822954162116	-0.07767999561658556	140	378712.2127408329	0.28193584624255463	1	0.4950185086637226	False	87585759,87610215,87660094,87681827		7_87681826_AG_A;7_87609614_TGCCTGGGATCGATGTTAAACATAGGTGGCAGGTGGCTGTTATCTTTATACTATAAAAATCATGATGTGATACAAAAATGTTTATCTTATTTTTAATGTAGAATTTTGTTTTTCGTGGTTTCAGTTTGTGTATTGTCTTAAGTTGGTTAAGGAGCAGGAACGTGAAGAACAATAAGTTCTTTAAACTTTTTTTTTCTTATGAAGCAATTCTGGGGCTGTGGAACATATAGAAAATTTTTTTAACTGGAGGAAAATTAAATAAGTCCATGTAGCTAGCTTCTGGTTGCAGAATGGATCCAATAATACATATTTTTTGATTGGAATGGATGGAAAAGTATCATTACATAATGTTTCTTCTTAATGTTCAGTAAA…			7_87681827_G_A;7_87681826_AG_A;7_87660094_C_A;7_87610215_C_G;7_87609614_TGCCTGGGATCGATGTTAAACATAGGTGGCAGGTGGCTGTTATCTTTATACTATAAAAATCATGATGTGATACAAAAATGTTTATCTTATTTTTAATGTAGAATTTTGTTTTTCGTGGTTTCAGTTTGTGTATTGTCTTAAGTTGGTTAAGGAGCAGGAACGTGAAGAACAATAAGTTCTTTAAACTTTTTTTTTCTTATGAAGCAATTCTGGGGCTGTGGAACATATAGAAAATTTTTTTAACTGGAGGAAAATTAAATAAGTCCATGTAGCTAGCTTCTGGTTGCAGAATGGATCCAATAATACATATTTTTTGATTGGAATGGA…			0.4108910891089109	7	1	87563458	87832204			1.653193206930693
ENSG00000008294	ENSG00000008294	O60271	17_49131523_G_C	rs113008816	0.09392720520099432	0.03808543120873749	1.0	0.00024184798546993258	0.2523641464039512	1.2659682833390902	0.2392783240784916	2.036628752065436	0.44125668858485145	0.9147322162130846	0.13787914368475107	202	29405201.35748025	0.11940717746465734	48	0.1148607747419482	True	49131523,49030180,49050672,49053894,49069417,49077340,49082330,49094036,49094755,49096634,49100009,49102153,49114861,49127213,49132784,49148353,49148807,49155798,49158779,49164867,49165138,49167831,49169141,49175864,49183697,49186305,49189064,49190387,49190715		17_49190714_CA_C;			17_49190715_A_C;17_49190714_CA_C;17_49190387_G_A;17_49189064_A_G;17_49186305_C_T;17_49183697_T_G;17_49175864_T_C;17_49169141_T_C;17_49167831_G_A;17_49165138_C_T;17_49164867_T_C;17_49158779_T_G;17_49155798_T_A;17_49148807_C_T;17_49148353_C_T;17_49132784_G_A;17_49127213_C_T;17_49114861_C_G;17_49102153_G_A;17_49100009_A_G;17_49096634_A_G;17_49094755_T_C;17_49094036_G_C;17_49082330_G_A;17_49077340_C_…	17_49053894_T_C;		0.099009900990099	17	-1	49039535	49198226			3.4035967425742566
ENSG00000008324	ENSG00000008324	Q9UHA2	3_42636141_G_A	rs4549	1.3868650563552885e-07	1.25812995279802e-08	1.0	2.6107514956903345e-12	0.3957543868093804	3.980832218000674e-10	0.4325455903651453	0.5831219959045886	0.07636891610096365	0.8849837874612079	0.0178104025814787	149	426361.4167695689	0.2795062895671997	2	0.2783100157621062	False	42636141,42588598,42588822,42591051,42592319,42592874,42595115,42597217,42598980,42599234,42603485,42604548,42608030,42610374,42613278,42613846,42625215,42625216,42631420,42633498,42635384,42635633,42637664,42639452,42643425,42645143,42650393,42651319,42651465,42653656,42653858,42655046,42670449,42677836,42681445,42689777,42691970,42693126,42697286,42697605,42700630				3_42636141_G_A;	3_42635633_A_G;3_42635384_C_T;3_42633498_T_C;3_42631420_A_C;3_42625216_A_C;3_42625215_CA_TC;3_42625215_CA_TC;3_42625215_C_T;			0.33663366336633666	3	1	42623332	42636606			4.4999565934834695
ENSG00000008382	ENSG00000008382	M0R0F2	19_4387125_C_T	rs62129351	0.09462809191024793	0.038436085558768616	1.0	4.667937554880736e-05	0.33767702226687324	0.0005221907216450409	0.37042046988732463	0.2107006508004473	0.2711577520248873	0.398873917902829	-0.094943367567084	202	934570.8782856044	0.5619182930186174	6	0.4294574797542101	False	4387125,4359525,4363289,4364777,4366219,4368142,4368797,4369447,4374850,4375162,4385659,4386352,4386845,4392715,4395763,4396505,4397034,4400314,4409756,4410646,4417845,4418515,4420042,4422178,4423419,4425236,4425305,4429007,4432444,4434503,4437450,4441407,4444742,4449287,4454083,4454736,4455862,4457518,4458063					19_4359525_A_G;			0.20544554455445546	19	1	4343524	4360083			3.428526138613862
ENSG00000008516	ENSG00000008516	Q9NPA2	16_3095818_A_G	rs3760080	0.0009199153596266797	0.00017971892019395157	1.0	7.944521494878616e-07	0.31518179933980595	8.094030112152548e-07	0.3287088246281634	0.4570869842057595	0.34276636908384817	0.12277615969388328	0.15665166968908026	167	410402.70741886745	0.5993080107121118	5	0.4261097984898992	False	3095818,3091695,3094261,3096077,3096159,3096863,3097074,3097568,3097940				16_3096863_G_T;	16_3097940_A_C;16_3097568_C_A;16_3097074_C_T;			0.25742574257425743	16	1	3096682	3110727			3.646757331683169
ENSG00000008838	ENSG00000008838	A0A0B4J1W0	17_38138624_G_A	rs2305481	0.0018190812972670191	0.00038434294060247793	1.0	3.793678382948294e-08	-0.3443779742104713	7.551149850097373e-07	-0.2749960383586528	0.4056573086960885	-0.2999152109146135	0.4144279243862261	-0.08610713253181845	202	10096085.556247696	0.09522881612417232	33	0.11506702336949685	False	38138624,38128181,38128765,38129841,38141955,38143479,38146542,38147294,38147657,38149411,38152373,38153473,38157841,38159744,38159745,38161507,38162983,38163902,38166412,38170845,38171294,38173143,38174167,38175462,38176256,38179275,38179492,38180352,38181133,38181168,38181176,38182229,38183090,38186501,38186825,38188419,38189049,38192137				17_38179492_A_G;17_38175462_C_T;	17_38192137_T_G;17_38189049_G_A;17_38188419_C_T;17_38186825_T_C;17_38186501_C_A;17_38183090_G_T;17_38182229_G_T;17_38181176_C_A;17_38181168_T_C;17_38181133_C_T;17_38180352_T_A;17_38179275_G_T;17_38176256_A_T;	17_38192137_T_G;17_38189049_G_A;17_38188419_C_T;17_38186825_T_C;17_38186501_C_A;17_38183090_G_T;17_38182229_G_T;17_38181176_C_A;17_38181168_T_C;17_38181133_C_T;17_38180352_T_A;17_38179492_A_G;17_38179275_G_T;17_38176256_A_T;17_38175462_C_T;	17_38179492_A_G;17_38176256_A_T;	0.3465346534653465	17	-1	38175350	38217468			3.940239386138613
ENSG00000008869	ENSG00000008869	Q9P2D3	2_37008066_G_A	rs35824556	0.031160955342861882	0.010038036884414831	1.0	1.819689980983109e-05	0.3047388437984012	0.00013310012068694423	0.26250767658327745	0.2312494988660975	0.8440009038038001	0.879546407342052	0.01973719407126251	202	4925674.174527252	0.12043709687048862	32	0.17715670530563826	False	37008066								0.14356435643564355	2	-1	37195526	37311485			2.3647056930465578
ENSG00000010165	ENSG00000010165	Q8N6R0	1_171741759_A_G	rs56167663	4.851725534537435e-05	7.2239200280131305e-06	1.0	3.5740147254880606e-09	-0.2673188156491632	2.3954374175170954e-08	-0.4575521179123148	0.17841881926134465	-0.4678375991803825	0.9800378749603462	0.0023082864222567787	202	17941143.176348895	0.10918704313882124	32	0.10989803283869526	False	171741759,171743575								0.21287128712871287	1	1	171750788	171783163			3.908911324553704
ENSG00000010270	ENSG00000010270	O95772-2	7_38267754_G_T	rs4720271	0.004939093685901924	0.001204854411965306	1.0	7.885130120401902e-07	0.3845559578712084	0.0005718322789793494	0.5044135339511359	0.6117604442024241	0.2388198254229885	0.5044261430369076	0.10529562525047977	114	550723.0324738815	0.4417344265624046	2	0.8279827596267243	False	38267754,38205202,38208199,38208359,38209137,38210453,38213208,38215152,38215273,38225926,38230469,38233712,38234282,38234690,38234818,38236462,38236504,38236807,38237178,38241686,38245446,38245875,38260759,38262332,38262723,38277800,38278373,38278883		7_38236807_C_CTT;		7_38241686_T_G;	7_38262723_C_T;7_38262332_A_G;7_38260759_A_G;7_38245875_A_G;7_38245446_T_C;7_38241686_T_G;7_38237178_G_A;7_38236807_C_CTT;7_38236807_C_T;7_38236504_G_T;7_38236462_C_G;7_38234818_T_C;7_38234690_T_C;7_38234282_C_T;7_38233712_G_T;7_38230469_G_A;7_38225926_G_A;7_38267754_G_T;			0.2079207920792079	7	1	38217824	38270272			3.5164188960396037
ENSG00000010539	ENSG00000010539	P98182-3	16_3373351_A_G	rs62033651	0.04587772802667462	0.016030085234651027	1.0	1.5724527363451764e-05	0.31213055652222343	2.346901843890904e-05	0.4575519075191276	0.005298163579509656	1.0123097914109611	0.4508774230083139	0.1476979072868192	61	881715.464010053	0.21260373076428624	1	0.197090170430852	False	3373351,3369801								0.25	16	-1	3272325	3286221			1.4079005564356433
ENSG00000010818	ENSG00000010818	P31629	6_143026868_A_T		0.04908779143280978	0.017302628732586364	1.0	1.817967727001817e-05	0.28968603565419393	5.31201917434533e-05	0.3701126047688272			0.5584470357551135	0.1021786108636752	108	859301.9781846659	0.380147216657834	1	0.6114403898597506	False	143026868,143028875,143030346								0.21287128712871287	6	-1	143072604	143266338			1.5892029980198021
ENSG00000011009	ENSG00000011009	O95372	1_24160777_G_A	rs12118592	0.04170823963567511	0.01426565330860853	1.0	2.920333683260246e-05	0.2862555557616919	0.0010643031060580286	0.41602305581162696	0.007635553092201755	0.3976966652591147	0.006247105416554012	0.26972545057653363	202	36894841.9590381	0.14437509574502747	10	0.14359218468056156	False	24160777,24072355,24099335,24105533,24106510,24107208,24117835,24118520,24121601,24128467,24134462,24134721,24143932,24175763,24176983,24183981,24185648,24186934,24187738,24190106,24191219,24192379,24192453,24193741,24193826,24193875,24193965,24194011,24194748,24194773,24194788,24194862,24194898,24195131,24195249,24195270,24195523,24195666,24201162		1_24118520_AG_A;1_24118519_TA_T;		1_24121601_C_T;	1_24118520_AG_A;1_24118519_TA_T;1_24117835_G_A;			0.08663366336633663	1	1	24117460	24122029			5.456107489781595
ENSG00000011021	ENSG00000011021	P51797	1_11921181_C_G	rs12406089	1.2161316182216698e-05	1.5587780896087188e-06	1.0	2.707925634611401e-09	0.4518745303203735	5.3337730178186136e-08	0.3751420143489686	0.760704514763193	0.3709105459099953	0.008423281640731356	0.24481808368295305	202	1939341.33614354	0.2389880091103795	12	0.254103776146236	False	11921181,11920189,11922298,11925300								0.3886138613861386	1	1	11866207	11903201			2.609905041288978
ENSG00000011028	ENSG00000011028	Q9UBG0	17_60637258_C_A	rs146385050	0.08508487954559649	0.033669758607654636	1.0	0.00012927063635174033	-0.3689839659365621	0.006603361209060257	-0.2796765023628696	0.020553738038740648	-0.4763529569617202	0.05495546020502422	-0.2510500018050992	202	5764328.7667495785	0.29828431859626026	23	0.2521282753074917	False	60637258								0.150990099009901	17	1	60704762	60770958			3.1425852673267327
ENSG00000011114	ENSG00000011114	Q9P203	14_93789673_C_G	rs169523	8.970053065929019e-05	1.4300845459200891e-05	1.0	3.097661756559581e-09	-0.3505643048943993	0.00797584419183145	-0.2402899122946185			0.4858637665961512	-0.10230568816149166	162	2079452.85543161	0.4198907484583846	3	0.7698795122706668	False	93789673,93731823,93770222,93774753,93799514					14_93774753_A_G;14_93770222_A_C;14_93731823_G_A;14_93789673_C_G;			0.17326732673267325	14	-1	93703896	93799438			2.6823272673267327
ENSG00000011332	ENSG00000011332	J3KQY6	19_38700033_G_C	rs1982076	0.017139809254376366	0.0049796332165939535	1.0	2.66351864061688e-06	0.2657067136228439	0.004632720769451818	0.2844111724497943	1.1473264980305196	0.12314346548926115	0.7903101197382228	0.031190641018317145	167	626397.8910962596	0.2800938581569689	3	0.3737579626342759	False	38700033,38693964,38695119,38695143,38695937,38698997								0.2301980198019802	19	-1	38701646	38720354			1.3126383044554455
ENSG00000011376	ENSG00000011376	Q15031	3_45526812_A_G	rs12639021	7.057532056447622e-12	3.0070720690002744e-13	1.0	1.0214512529060984e-25	-0.7141063330136159	6.525214485244427e-21	-0.6553999202371735	2.8843577288980067e-07	-0.5718511006859792	1.1266775241874627e-09	-0.6593944782870698	202	25558424.00178129	0.11920644187485499	33	0.09205197216419844	False	45526812,45493876,45493941,45495358,45495927,45496144,45498342,45501088,45503903,45507305,45511026,45511266,45514884,45528423,45529692,45529896,45530401,45534973,45535941,45537973,45542083,45545451,45546577,45549298,45549807,45550661,45551898,45555044,45555700,45555765,45557003,45557707,45559621,45560113,45561149,45561203,45561487,45564003,45564439,45564879,45567557,45569582,45570065,45573466,455…		3_45577250_ACACACACACCCCCACACC_A;3_45495927_AAACT_A;3_45493876_AT_A;			3_45587983_A_G;3_45587111_G_A;3_45581959_C_G;3_45579699_T_C;3_45579533_T_A;3_45577250_ACACACACACCCCCACACC_A;3_45573541_A_G;3_45573466_T_G;3_45570065_A_G;3_45569582_A_G;3_45567557_G_A;3_45564879_G_T;3_45564439_A_T;3_45564003_G_A;3_45561487_C_T;3_45561203_A_G;3_45560113_A_G;3_45559621_C_T;3_45557003_C_T;3_45555765_C_T;3_45555700_A_G;3_45555044_C_A;3_45551898_C_T;3_45550661_C_T;3_45549807_G_A;3_4554…		3_45557707_G_A;	0.2797029702970297	3	1	45429998	45590913	0.9865709694805186	3_45511026_C_T	3.9605744892903663
ENSG00000011478	ENSG00000011478	Q9NXS2	19_46190268_G_A	rs1964272	5.3728301324854306e-17	9.685307742043269e-19	1.0	2.3695418093072128e-24	-0.8780075000357448	1.569328172368339e-18	-0.8136530474632842	0.0010155442898227584	-0.5184217878521724	0.0011618505750951296	-0.3881189095430946	201	924803.6707678154	0.3075287392091635	8	0.2972168540923624	False	46190268,46196634,46203083					19_46203083_G_A;19_46196634_C_G;	19_46196634_C_G;		0.4975247524752475	19	1	46195741	46207247			3.3862937277227725
ENSG00000011523	ENSG00000011523	Q76N32	2_65280185_A_G	rs2723063	4.314956071409292e-20	4.343746015933502e-22	1.0	1.0559290713128014e-28	0.7239638284246879	3.7937049821321936e-23	0.5359683850409579	1.6349776991649606e-06	0.5112795492140029	0.00044412805557247556	0.3611118568315541	174	680635.1379512476	0.21432975605309013	5	0.33133607858451275	False	65280185,65276049,65276452,65276736,65277951,65279414,65279805,65283972,65284156,65284231,65290842,65291546					2_65291546_A_G;2_65290842_C_A;2_65284231_A_T;2_65284156_C_A;2_65283972_T_C;			0.405940594059406	2	1	65283500	65314138			2.80539778571759
ENSG00000011638	ENSG00000011638	I3NI21	16_21161439_A_G	rs11074485	1.420656357954441e-10	7.549783290545665e-12	1.0	2.6871237884566325e-19	0.8035837636796018	6.34299678973673e-17	0.7850341177617437	0.001746993111441243	0.30032484587676034	0.0038153245716527283	0.2594920104779121	180	552066.8984581423	0.3230916071050029	1	0.3652719390694637	False	21161439,21149638,21150214,21150269,21150808,21150905,21150994,21152073,21152074,21152481,21153098,21153114,21153415,21153426,21154385,21154917,21154963,21155543,21156133,21156829,21157013,21157745,21158088,21158475,21158482,21158508,21158881,21159071,21159213,21159431,21159794,21159867,21160381,21160547,21161526,21163647,21163883,21164018,21164254,21165011,21165035,21165220,21165279,21165479,211…		16_21177161_GAAAC_G;16_21171506_C_CAGG;		16_21169828_G_A;	16_21184379_G_A;16_21184277_A_G;16_21183310_C_T;16_21177161_GAAAC_G;16_21176916_C_T;16_21176505_G_A;16_21173940_C_T;16_21173137_T_C;16_21171506_C_CAGG;16_21171456_A_G;	16_21184379_G_A;16_21184277_A_G;16_21183310_C_T;16_21177161_GAAAC_G;16_21176916_C_T;16_21176505_G_A;16_21173940_C_T;16_21173137_T_C;16_21171506_C_CAGG;16_21171456_A_G;16_21169828_G_A;		0.3762376237623761	16	1	21169698	21191937			3.6769978762376234
ENSG00000012048	ENSG00000012048	P38398-4	17_41359589_C_T	rs2356310	2.6146576721227653e-08	2.03834953720445e-09	1.0	1.632781459530781e-11	0.5125686618795638	0.00015690477417889826	0.40238724636854495	0.07747791035074686	0.4811581127121301	0.01698814526971786	0.2489577834281929	202	5477991.487045651	0.1335602277901018	26	0.14862433869673478	True	41359589,41173226,41174025,41176688,41176831,41179864,41181297,41181746,41181835,41181898,41182662,41186030,41187567,41187684,41187974,41188342,41188786,41189045,41189383,41190715,41191129,41192016,41193910,41194885,41195025,41195711,41195773,41196408,41197274,41198621,41199913,41200109,41200537,41200704,41201702,41202688,41203591,41204377,41204390,41205772,41205941,41206056,41206761,41209578,412…	17_41244936_G_A;17_41244435_TCTTTAA_T;17_41244435_T_C;17_41244000_T_C;17_41223094_T_A;	17_41274905_AG_A;17_41271293_GA_G;17_41267518_CA_C;17_41250678_C_CT;17_41249363_TA_T;17_41249363_TA_T;17_41247604_AAAAC_A;17_41247122_A_ACCT;17_41244935_CGG_C;17_41244935_CG_CAA;17_41244435_TCTTTAA_T;17_41243998_CTT_C;17_41242075_A_AAAG;17_41242075_AAAG_A;17_41241568_T_TC;17_41234469_AAG_A;17_41230105_CT_C;17_41229760_AT_A;17_41226736_GGGGTT_G;17_41226734_ATGGGGT_A;17_41223093_CT_C;17_41214209_CA…		17_41245466_G_A;17_41245237_A_G;17_41244936_G_A;17_41244935_CGG_C;17_41244935_CG_CAA;17_41244435_TCTTTAA_T;17_41244435_T_C;17_41244000_T_C;17_41243998_CTT_C;17_41234470_A_G;17_41234469_AAG_A;17_41223094_T_A;17_41223093_CT_C;17_41197274_C_A;17_41196408_G_A;	17_41277187_G_C;17_41276348_T_C;17_41276247_A_G;17_41275645_A_G;17_41275151_G_C;17_41274906_G_A;17_41274905_AG_A;17_41274778_G_A;17_41273537_A_C;17_41273348_T_C;17_41271293_GA_G;17_41270666_C_A;17_41270463_G_A;17_41270277_C_T;17_41270229_T_G;17_41268206_A_C;17_41267518_C_A;17_41267518_CA_C;17_41267050_G_A;17_41265776_A_G;17_41264364_A_G;17_41264146_G_A;17_41263566_T_C;17_41263044_A_G;17_41261233_…	17_41277187_G_C;17_41276348_T_C;17_41276247_A_G;17_41275645_A_G;17_41275151_G_C;17_41274906_G_A;17_41274905_AG_A;17_41274778_G_A;17_41273537_A_C;17_41273348_T_C;17_41271293_GA_G;17_41270666_C_A;17_41270463_G_A;17_41270277_C_T;17_41270229_T_G;17_41268206_A_C;17_41267518_C_A;17_41267518_CA_C;17_41267050_G_A;17_41265776_A_G;17_41264364_A_G;17_41264146_G_A;17_41263566_T_C;17_41263044_A_G;17_41261233_…	17_41245466_G_A;17_41245237_A_G;17_41234470_A_G;	0.3316831683168317	17	-1	41196312	41277500			3.0056272475247523
ENSG00000012061	ENSG00000012061	P07992	19_45913456_T_A	rs12984194	0.0019715374452734385	0.00042070850552891007	1.0	2.1281554669706173e-07	0.4009629244701928	4.697361025453529e-05	0.4753620593273826	0.1680217930072675	0.21740308102223005	0.6251488789854338	0.05266319324289248	202	1832071.084661924	0.177903964632882	5	0.13625257894770484	True	45913456,45910672,45912736,45913086,45913309,45913460,45915038,45918536				19_45912736_C_A;19_45910672_A_G;	19_45918536_T_G;19_45915038_T_C;19_45913460_T_C;19_45913309_T_C;19_45913086_C_G;19_45913456_T_A;			0.2797029702970297	19	-1	45910591	45982086			3.2348380940594055
ENSG00000012660	ENSG00000012660	Q9NYP7	6_53122053_G_A		0.001016521488207334	0.00020192402733089606	1.0	1.9296862345525478e-08	0.7846289000696576	9.335433860159633e-06	0.5421982641766921			0.786326751375991	0.05756157586034585	176	1518941.4897045891	0.2430742162607584	3	0.2520517500316039	False	53122053,53103626,53107823,53108676,53108682,53109761,53109956,53109958,53110301,53110486,53110684,53110954,53111466,53111497,53111504,53111517,53111597,53111712,53111758,53112290,53112374,53112652,53112991,53113145,53113320,53113448,53113554,53113570,53113644,53114186,53114417,53114498,53115190,53115621,53117872,53118091,53123958,53125994,53126116,53126837,53127252,53128039,53128143,53129261,531…		6_53163175_AACTT_A;			6_53176537_C_T;6_53171621_C_T;6_53169941_C_T;6_53167352_G_C;6_53166993_G_C;6_53163175_AACTT_A;6_53159576_T_C;6_53159399_T_C;6_53159090_G_T;6_53158195_A_G;6_53158052_G_A;6_53156464_A_C;6_53148841_C_T;6_53148251_T_C;6_53148019_T_C;6_53147972_G_A;6_53144016_T_C;6_53136261_T_C;		6_53159090_G_T;	0.04950495049504952	6	-1	53132196	53213947			6.038768064356436
ENSG00000012822	ENSG00000012822	Q9P1Z2-2	12_54109659_C_T	rs3741659	0.08514050989157805	0.033735295093408835	1.0	0.0005121967356867452	0.2740078880840927	0.023045520949868423	0.42063891266393694	1.267433059805939	0.349776025348927	0.6106331536830447	0.05140683609658536	202	1062528.4704237916	0.21006852729370185	5	0.2503434304304697	False	54109659,54109927,54112090,54112362,54113222,54113924,54114098,54114819,54115624,54117592,54118740,54119247,54122073,54126732,54128726,54128892,54129220,54129496,54132019	12_54109659_C_T;				12_54119247_C_T;12_54118740_C_G;12_54117592_G_A;12_54115624_C_A;12_54114819_C_T;12_54114098_G_A;12_54113924_G_A;12_54113222_G_A;12_54112362_A_G;12_54112090_C_T;12_54109927_C_T;			0.1782178217821782	12	-1	54104903	54121529			2.031936415841584
ENSG00000012963	ENSG00000012963	Q8N806	14_93666380_A_G	rs1263387	2.336308419968121e-05	3.216081823577795e-06	1.0	2.522487652811621e-08	0.3554561015346921	1.324487980937932e-13	0.4303335107149139	0.12634726105606098	0.5856322736836371	0.5485942593341983	-0.050977452321633976	202	9550457.607973097	0.12168662149255045	18	0.12378131943129067	False	93666380,93667525,93667720,93682589,93688056,93688307,93690301,93693422,93693831,93696317				14_93693831_C_T;14_93693422_C_T;	14_93690301_A_G;14_93688307_A_T;14_93688056_C_G;14_93682589_A_G;	14_93693422_C_T;14_93690301_A_G;14_93688307_A_T;14_93688056_C_G;14_93682589_A_G;		0.30445544554455445	14	1	93673401	93695561			4.10308189108911
ENSG00000013016	ENSG00000013016	Q9NZN3	2_31477838_G_A	rs655029	0.0036367958073566923	0.0008454496632810946	1.0	1.1937960330773646e-07	-0.3502777503134153	3.321788830812197e-05	-0.2710331982299564	0.0828947273226435	-0.43748524298771296	0.025628784752818545	-0.16846653084368945	202	1389811.5117912584	0.21269016625355847	7	0.20095728063964274	False	31477838,31458190,31460932,31462373,31462712,31463534,31463866,31464829,31464974,31465541,31479900,31480015,31480130,31480351,31480495,31480967		2_31462712_A_ACT;2_31462372_GC_G;			2_31480967_G_A;2_31480495_C_A;2_31480351_C_T;2_31480130_A_C;2_31480015_T_G;2_31479900_C_T;2_31465541_G_T;2_31464974_C_T;2_31464829_A_G;2_31463866_G_C;2_31463534_C_A;2_31462712_A_ACT;2_31462373_C_A;2_31462372_GC_G;2_31460932_G_A;2_31458190_G_A;2_31477838_G_A;			0.34405940594059403	2	1	31456880	31492313			2.4576546939114934
ENSG00000013392	ENSG00000013392	Q9UIY3	6_83887495_T_C		0.007340931308772833	0.0018930202122470505	1.0	1.1931829172490915e-05	-0.35315183841865594	0.01066645240584665	-0.18887558348800496	1.7378236202484119	-0.018055052621682943	0.15803078263201886	0.15149684510857764	184	756527.9146866838	0.28756234343047904	2	0.5097837893195121	False	83887495,83777810,83780297,83780469,83781827,83782301,83782947,83784072,83784497,83784806,83785126,83785286,83785869,83786338,83786469,83786518,83789558,83789827,83792261,83797127,83797892,83798788,83799210,83802813,83803514,83804153,83805987,83807396,83807920,83808138,83809512,83810053,83811578,83812218,83812438,83814435,83815235,83816423,83816525,83817591,83818965,83820434,83821694,83828254,838…				6_83908232_C_T;	6_83903626_G_C;			0.2524752475247525	6	1	83903098	83908651			1.7525884207920794
ENSG00000013503	ENSG00000013503	Q9NW08	12_106927958_C_T	rs7295942	3.901192462036565e-05	5.63967305468238e-06	1.0	4.9816520626766754e-11	-0.38067982273241296	1.6404189430239538e-05	-0.3202833262384517	0.7786740348447355	-0.3550851335935157	0.15827623681289005	-0.14464438909353114	202	18135588.62604613	0.09827757610179257	35	0.07656507353586132	False	106927958,106756612,106759456,106763912,106777240,106779896,106780188,106782548,106783973,106785122,106785502,106807350,106807882,106808320,106808486,106819477,106829279,106832059,106832618,106834833,106837600,106842980,106847612,106848698,106852056,106855733,106856038,106859465,106860960,106861711,106873123,106878029,106878371,106880726,106880836,106880963,106884480,106897614,106900305,106901211…		12_106884479_GA_G;12_106856037_TC_T;12_106832618_C_CA;12_106807882_GCCAT_G;			12_106901211_G_A;12_106900305_G_A;12_106897614_A_G;12_106884480_A_G;12_106884479_GA_G;12_106880963_T_C;12_106880836_C_T;12_106880726_A_G;12_106878029_C_T;12_106873123_T_C;12_106861711_G_T;12_106860960_G_A;12_106859465_C_T;12_106856038_C_T;12_106856037_TC_T;12_106855733_C_T;12_106852056_A_G;12_106848698_A_G;12_106847612_G_A;12_106842980_G_A;12_106837600_A_G;12_106834833_T_C;12_106832618_C_CA;12_10…			0.2599009900990099	12	1	106751436	106903976			2.4451450742574257
ENSG00000013523	ENSG00000013523	Q9UNK9	14_77282104_A_G	rs72737540	0.0008924280027856129	0.0001736176215181656	1.0	2.8017990861698413e-08	0.3120242986406499	2.0517792903234614e-08	0.299196161217255	0.2356994242134424	0.1718919275205617	0.10746830252392882	0.14626353281540627	176	665585.0791943353	0.23660265260184346	5	0.2744726839847825	False	77282104,77274018,77274852,77278483					14_77278483_T_C;14_77274852_T_C;14_77274018_C_T;14_77282104_A_G;	14_77278483_T_C;		0.20544554455445546	14	-1	77253588	77292589			3.3514318267326733
ENSG00000013561	ENSG00000013561	Q9UBS8	5_141343853_A_C	rs252143	1.4261391207740045e-07	1.2954277861648455e-08	1.0	5.440093115856564e-11	-0.4738703758228932	9.078130329456334e-05	-0.5350243275734817	1.8241236737355964	-0.18134546157190806	0.06550571291442936	-0.183805293392739	200	1628048.428918184	0.2659068419354723	6	0.28035961499397616	False	141343853,141339522,141344511,141344794,141345192,141345218,141345361,141345678,141346830,141347360,141347931,141348634,141348708,141352387,141354116,141357083,141357628,141357719,141359109,141359337,141361232,141362162,141362272,141362289,141362306,141364511,141364637,141364713,141366415,141366651,141368091,141369422,141370370,141370457,141373086,141373372,141373761,141373949,141374203,141374426…		5_141364713_AAC_A;5_141362306_AT_A;5_141357719_TTGTA_T;		5_141369422_G_A;5_141368091_C_T;5_141348634_G_A;	5_141366651_A_G;5_141366415_A_T;5_141364713_AAC_A;5_141364637_C_T;5_141364511_A_G;5_141362306_AT_A;5_141362289_C_G;5_141362272_G_A;5_141362162_A_G;5_141361232_T_C;5_141359337_C_T;5_141359109_T_G;5_141357719_TTGTA_T;5_141357628_G_A;5_141357083_T_C;5_141354116_T_C;5_141352387_T_C;5_141348634_G_A;5_141347931_A_G;5_141347360_C_T;5_141346830_T_C;5_141345678_C_T;5_141345361_T_G;5_141345218_T_C;5_141345…	5_141362306_AT_A;5_141362289_C_G;5_141362272_G_A;5_141362162_A_G;5_141361232_T_C;5_141359337_C_T;5_141359109_T_G;5_141357719_TTGTA_T;5_141357628_G_A;5_141357083_T_C;5_141354116_T_C;5_141352387_T_C;		0.1707920792079208	5	1	141337893	141369856			2.5527662079207922
ENSG00000013573	ENSG00000013573	Q96FC9-3	12_31242399_T_C	rs3881298	4.6485098074261076e-11	2.2527016976172405e-12	1.0	8.129142247443678e-17	-0.4994135314859997	7.361934961879195e-43	-1.1908201530216629	0.21723539571633627	0.16659072697382293	0.01815328233587361	0.21564699953473565	202	2956183.0404322306	0.24690203445173065	1	0.5769426500536523	True	31242399,31213052,31213631,31213644,31213735,31214179,31215030,31218038,31221072,31221455,31222178,31222479,31222713,31223277,31223322,31223430,31223471,31224337,31224540,31224665,31224851,31225009,31225099,31225205,31225213,31225230,31225344,31225385,31225411,31225474,31225778,31225839,31226440,31226835,31227175,31227461,31227480,31227521,31228738,31229317,31229369,31229415,31229428,31229485,312…	12_31256905_T_C;12_31256546_G_A;	12_31245502_CT_C;12_31243423_TC_T;12_31233537_GA_G;12_31229415_TA_T;12_31227175_ACAG_A;	12_31240925_A_G;	12_31257695_T_C;12_31257464_G_A;12_31257327_T_C;12_31256905_T_C;12_31256546_G_A;12_31253995_C_T;12_31242440_A_G;12_31227175_ACAG_A;12_31226835_T_A;12_31242399_T_C;	12_31256546_G_A;12_31256368_G_T;12_31256342_G_A;12_31256220_A_G;12_31256219_CA_TG;12_31256219_CA_TG;12_31256219_C_T;12_31256164_G_T;12_31256075_G_A;12_31255654_A_G;12_31255626_T_C;12_31254959_C_T;12_31254752_C_T;12_31254701_G_T;12_31254522_T_C;12_31254317_C_A;12_31254256_C_T;12_31254221_T_G;12_31252886_C_T;12_31251803_G_A;12_31251544_C_T;12_31251070_G_A;12_31250669_G_A;12_31248336_G_A;12_31247986…	12_31257695_T_C;12_31257464_G_A;12_31257327_T_C;12_31256905_T_C;12_31256546_G_A;12_31256368_G_T;12_31256342_G_A;12_31256220_A_G;12_31256219_CA_TG;12_31256219_CA_TG;12_31256219_C_T;12_31256164_G_T;12_31256075_G_A;12_31255654_A_G;12_31255626_T_C;12_31254959_C_T;12_31254752_C_T;12_31254701_G_T;12_31254522_T_C;12_31254317_C_A;12_31254256_C_T;12_31254221_T_G;12_31253995_C_T;12_31252886_C_T;12_31251803…	12_31256546_G_A;12_31253995_C_T;12_31242399_T_C;	0.4752475247524752	12	1	31226779	31257725			3.3398434108910893
ENSG00000013583	ENSG00000013583	Q9NRV9	12_13154077_C_T	rs67498669	5.178319731955102e-11	2.5336973521681293e-12	1.0	2.8044662229166967e-18	-0.6741682078883111	5.308203897849839e-18	-0.6902459016198738	0.0003826641681626608	-0.3810215351217901	8.728079471563177e-07	-0.4839698183000176	202	13252295.516337626	0.18185733509376809	11	0.12430969224958542	False	13154077,13145613,13146497,13146967,13154105,13154123,13155339,13165945,13169377,13169435,13173819,13174949,13175607,13176226,13176310,13177066,13177289,13177941,13178072,13178155,13178751,13178843,13178961,13178994,13179001,13179236,13179433,13179448,13179701,13179704,13183951					12_13146967_C_A;12_13146497_T_C;12_13145613_C_T;			0.3589108910891089	12	-1	13127798	13153207	0.7951840164975911	12_13186361_C_G	3.4005346633663365
ENSG00000013810	ENSG00000013810	Q9Y6A5	4_1690642_G_A	rs4865462	1.0042859429972592e-06	1.0486047771901617e-07	1.0	6.322722546517947e-12	0.35501374909616296	1.5476974059256234e-07	0.3695083971465026	0.08859043188797519	0.27476525940534624	0.21841752052163224	0.10036069808198668	202	34047608.181607	0.12796459950689346	33	0.11876449290962406	True	1690642,1696103,1702293,1703646,1704542								0.4752475247524752	4	1	1723227	1746898			5.364428757425743
ENSG00000014138	ENSG00000014138	Q14181	11_65017277_T_A	rs1212391	4.529251726537789e-07	4.506454369140958e-08	1.0	3.856045752373079e-12	0.7441159518997338	1.3723482610919213e-07	0.5694944836484852	0.1962249656255943	0.3461388555481659	0.08352995544213028	0.23329803591489065	202	11781081.225151034	0.14483588944875966	19	0.1489649544117163	True	65017277,65001046,65001679,65003026,65003197,65003812,65005482,65005886,65008771,65008917,65011466,65012857,65012974,65014843,65016173,65016408,65016838,65021612,65025878,65026462,65026590,65027808,65030189,65033874,65036835,65039241,65039264,65042530,65042941,65045278,65045615,65045725,65046984,65049278,65050182,65060427,65063553,65064690,65064918,65069275,65069534,65078626,65082673,65086145,650…	11_65064690_G_A;	11_65046984_CT_CTT;11_65046984_C_CC;		11_65064918_C_G;11_65063553_A_T;	11_65069534_A_C;11_65069275_G_C;11_65064918_C_G;11_65064690_G_A;11_65063553_A_T;11_65060427_G_A;11_65050182_T_C;11_65049278_A_G;11_65046984_CT_CTT;11_65046984_C_CC;11_65045725_G_T;11_65045615_T_C;11_65045278_T_G;11_65042941_A_G;11_65042530_A_C;11_65039264_T_C;11_65039241_T_C;11_65036835_G_A;11_65033874_T_C;11_65030189_C_G;	11_65063553_A_T;11_65060427_G_A;11_65050182_T_C;11_65049278_A_G;11_65046984_CT_CTT;11_65046984_C_CC;11_65045725_G_T;11_65045615_T_C;11_65045278_T_G;11_65042941_A_G;11_65042530_A_C;11_65039264_T_C;11_65039241_T_C;11_65036835_G_A;11_65033874_T_C;11_65030189_C_G;		0.14603960396039606	11	1	65029233	65073060			3.159925371287129
ENSG00000014164	ENSG00000014164	Q8IXZ2	8_144634735_G_T	rs73715669	0.04185733331127997	0.014326447688421238	1.0	1.1702868368956778e-05	-0.3103171865630742	0.0004791797761198627	-0.2583176997160536	0.11402153677231185	-0.6379632464269385	0.6755246844494953	-0.04850706223162599	202	1885309.3395604503	0.1826281014821367	10	0.25179177041714285	False	144634735,144565421,144565798,144568825,144571187,144571431,144571600,144571841,144603486,144608418,144617923,144619844,144620855,144622387,144623304,144623852,144624438,144624917,144625439,144625793,144626708,144628078,144628208,144629346,144630174,144630847,144631953,144631988,144632006,144638273,144638888	8_144620855_C_A;	8_144622387_CT_C;8_144622386_GC_G;8_144619844_TG_T;			8_144623304_C_A;8_144622387_CT_C;8_144622386_GC_G;8_144619844_TG_T;8_144617923_G_A;8_144608418_G_T;8_144603486_G_C;8_144571841_C_G;8_144571600_G_A;8_144571431_T_C;8_144571187_T_C;8_144568825_G_A;8_144565798_G_C;8_144565421_C_T;			0.20544554455445546	8	-1	144519825	144623623			3.3552472425742574
ENSG00000014216	ENSG00000014216	P07384	11_64944182_A_G	rs7933509	2.7767602102785807e-08	2.1809740150964856e-09	1.0	3.810598357062926e-14	-0.3893957081809083	1.8590832277938926e-06	-0.4336121757058784	0.2745762975672088	-0.8930706040208558	0.14695503938572538	-0.138136743364611	202	46010405.31250202	0.13809601924984716	47	0.1389037676212555	True	64944182,64944965,64947240,64947279,64948277,64948555,64950843,64950970,64951839,64954053,64954881,64966168,64968186,64969050,64977424		11_64954881_TC_T;		11_64950843_A_T;	11_64977424_C_T;11_64969050_G_A;11_64968186_A_G;11_64966168_C_T;11_64954881_TC_T;11_64954881_T_C;11_64954053_C_T;11_64951839_C_T;11_64950843_A_T;11_64948555_A_G;11_64948277_A_C;	11_64954881_TC_T;11_64954881_T_C;11_64954053_C_T;11_64951839_C_T;11_64950970_C_T;11_64950843_A_T;	11_64950970_C_T;	0.2945544554455445	11	1	64948037	64979477			4.606129930693069
ENSG00000014824	ENSG00000014824	Q6PML9	4_42037009_A_G	rs11730171	0.0038474905986901928	0.0009029870830356828	1.0	5.6196585625264416e-08	-0.3859091949954211	1.3210376111453774e-26	-0.3735570353665804	0.013573566277637856	-0.3912381046709528	0.019168416840400646	-0.21472525721123328	202	3600604.963203624	0.2206822400318693	9	0.29976706296681793	False	42037009,41935684,41953081,41956413,41963282,42008243,42011970,42017500,42018820,42018944,42033414,42036458,42037608,42039082,42040056,42041692,42043304,42043387,42043803,42049235,42050538,42050768,42051038,42056147,42057139,42058286,42063690,42065293,42068230,42069029,42072219,42073999,42074565,42074633,42075137,42075354,42084252,42089177,42091257,42091491,42091583,42094015,42094638,42096000,420…		4_42084252_TAAATA_T;4_42073999_TTGTC_T;4_42050538_GC_G;4_42039082_AT_A;4_42039081_GA_G;4_42036458_CG_C;4_42018812_GTCTATCTA_G;		4_42091583_C_T;4_42091491_G_C;4_42091257_C_T;4_42089177_G_A;	4_42084252_TAAATA_T;4_42075354_T_C;4_42075137_C_T;4_42074633_A_G;4_42074565_G_A;4_42073999_TTGTC_T;4_42072219_T_G;4_42069029_T_C;4_42068230_A_G;4_42065293_C_T;4_42063690_G_A;4_42063689_TG_CA;4_42058286_T_C;4_42057139_A_G;4_42056147_G_A;4_42051038_G_T;4_42050768_A_G;4_42050538_GC_G;4_42049235_A_G;4_42043803_C_G;4_42043387_C_T;4_42043304_G_A;4_42041692_A_T;4_42040056_T_C;4_42039082_AT_A;4_42039081_…	4_42084252_TAAATA_T;4_42075354_T_C;4_42075137_C_T;4_42074633_A_G;4_42074565_G_A;4_42073999_TTGTC_T;4_42072219_T_G;4_42069029_T_C;4_42068230_A_G;4_42065293_C_T;4_42063690_G_A;4_42063689_TG_CA;4_42058286_T_C;4_42057139_A_G;4_42056147_G_A;4_42051038_G_T;4_42050768_A_G;4_42050538_GC_G;4_42049235_A_G;4_42043803_C_G;4_42043387_C_T;4_42043304_G_A;4_42041692_A_T;4_42040056_T_C;4_42039082_AT_A;4_42039081_…		0.2821782178217821	4	1	41992489	42092474			4.290081900990099
ENSG00000014919	ENSG00000014919	Q7KZN9-2	10_101376739_C_T		0.01809909775757232	0.0053007073146957686	1.0	1.4934981061565287e-05	-0.2600129137806985	0.00037218303217466825	-0.1638968531087625	0.0013205299798540364	-0.3447675160831918	0.0003426068194300263	-0.27158895138305583	202	5496414.706905534	0.17829968181805245	8	0.1795817124228956	True	101376739,101357635,101363234,101364091,101364164,101364524,101366541,101367645,101368199,101386467,101398962,101410062,101422496,101426013,101429593,101445591,101451259,101451611,101452494,101471695,101474499,101475039,101480549,101480550,101515316		10_101480550_T_TG;10_101480549_T_TG;		10_101471695_C_T;	10_101480550_T_TG;10_101480549_TT_TGG;10_101480549_TT_TGG;10_101480549_T_TG;10_101475039_C_T;10_101474499_T_C;			0.2920792079207921	10	-1	101471601	101491857			3.8586959009900994
ENSG00000015475	ENSG00000015475	P55957	22_18167478_T_C	rs5747326	0.01709261226325384	0.004952468583204258	1.0	1.154694791721944e-05	0.28884577038570663	0.0002805001049965518	0.3572305526915948	0.02345997560101449	0.3531746272686029	0.0359551346557174	0.19152013177805527	202	4411977.917377069	0.19584769545966305	10	0.2393896008227073	True	18167478								0.33910891089108913	22	-1	18216906	18257536			2.592784069306931
ENSG00000015532	ENSG00000015532	Q9H1B5	17_48441589_A_G	rs8067510	1.4737483960613281e-06	1.5991627802280828e-07	1.0	1.0012240358935264e-10	0.3746988467286183	1.0593041726994786e-06	0.3345194382746801	1.0884243022392617	0.14709327741891087	0.07178441630995043	-0.17760279666206769	171	657623.0809513412	0.22501378565871635	4	0.2910702027588419	False	48441589,48408836,48416268,48417221,48418710,48419660,48422838,48423955,48424944,48425967,48427191,48429932,48430291,48430694,48432681,48433081,48433958,48438055,48445674,48449270,48450227,48452978,48454453,48458925				17_48438055_G_T;	17_48438055_G_T;17_48433081_G_A;17_48432681_G_A;17_48430694_G_A;17_48430291_C_T;17_48429932_A_G;17_48427191_C_T;17_48425967_T_G;17_48423955_G_T;	17_48438055_G_T;17_48433958_T_C;17_48433081_G_A;17_48432681_G_A;17_48430694_G_A;17_48430291_C_T;17_48429932_A_G;17_48427191_C_T;17_48425967_T_G;17_48423955_G_T;	17_48433958_T_C;	0.4430693069306931	17	1	48423453	48440499			3.3202928217821777
ENSG00000015568	ENSG00000015568	Q99666	2_110524226_C_G	rs76595008	1.5690910142779132e-06	1.7099657430559956e-07	1.0	2.9365676960089443e-10	0.4696002192928684	8.410837983805233e-05	0.3302407749468818	1.2441935284089305	-0.043384111735437436	0.9593250563497148	-0.006530062106268969	128	122807.21613812381	0.39517771239023797	2	0.3894299615647139	False	110524226								0.2871287128712871	2	1	110550335	110615272			2.0119976185484676
ENSG00000015676	ENSG00000015676	Q8IVD9	7_44551157_T_C	rs73107454	2.258982000332591e-08	1.7399159033347125e-09	1.0	5.628883511271373e-17	0.4740521299100946	5.1159668633213805e-14	0.6132892793990601	0.005873819920289479	0.4938524791815517	5.753260008274991e-07	0.416864036387846	202	10106494.599991774	0.14474182826884366	12	0.12973573657403842	True	44551157,44377654,44378014,44378204,44379065,44381979,44382528,44383413,44383921,44385761,44388494,44390020,44390062,44392321,44400529,44400672,44402376,44403107,44403843,44405285,44406600,44407968,44408133,44408595,44408617,44408813,44409474,44411028,44411404,44412735,44412789,44413501,44413814,44414158,44414799,44415584,44415692,44415700,44415759,44416166,44419168,44419191,44420147,44420238,444…	7_44444122_G_A;	7_44516624_AT_A;7_44480148_AT_A;7_44479488_GCTAA_G;7_44474691_CTTT_C;7_44443144_CT_C;7_44436550_TTG_T;7_44436549_TTTG_T;7_44435267_ACA_A;7_44428860_GAC_G;		7_44424983_T_C;7_44422074_A_G;7_44421489_C_G;7_44420651_A_G;7_44420639_C_A;7_44420362_A_G;7_44420238_A_G;7_44420147_G_C;7_44419191_C_T;7_44419168_A_G;	7_44529726_G_A;7_44529662_G_A;7_44528426_G_A;7_44526475_T_C;7_44525803_C_G;7_44525374_C_T;7_44524200_C_G;7_44523651_C_G;7_44522617_T_C;7_44520258_T_A;7_44520234_A_C;7_44518053_A_G;7_44517210_G_A;7_44516624_AT_A;7_44513781_C_A;7_44513558_C_G;7_44513444_A_G;7_44510837_G_A;7_44510076_T_A;7_44510024_C_T;7_44509699_G_T;7_44509119_T_C;7_44509037_G_A;7_44504177_T_C;7_44504112_G_A;7_44501347_C_T;7_445004…			0.2153465346534653	7	-1	44418720	44530479	0.8496157540826097	7_44553826_A_G	3.061422247524753
ENSG00000016391	ENSG00000016391	Q8NE62	3_53876218_A_G	rs6801605	0.0002615480822610696	4.5372147712853226e-05	1.0	4.89229696337548e-08	0.3875049505958793	7.190762632510303e-08	0.3450376825846657	0.03737671083184675	0.3796039631665762	0.4293508218753824	0.07627813263799799	202	2196048.856831529	0.34121506380693284	10	0.33132043779916265	True	53876218,53872017,53872039,53873814,53877149,53877211,53877233,53878452,53881471,53881830,53883722,53883910,53884218		3_53877211_CCA_C;			3_53878452_C_T;3_53877233_G_C;3_53877211_CCA_C;3_53877149_G_T;3_53873814_A_G;3_53872039_G_A;3_53872017_C_G;3_53876218_A_G;			0.33663366336633666	3	-1	53846362	53880417			1.856027618365993
ENSG00000016864	ENSG00000016864	Q68CQ7	3_52674667_C_T	rs11130310	3.023178446246053e-07	2.915953458628992e-08	1.0	6.008517794479643e-12	-0.5115764569356465	0.00451068390072497	-0.3037491466458337	0.27671405978007263	-0.241856015389074	0.6320763161793277	0.04212897203081845	202	2580693.8981579426	0.2165807618069341	11	0.23112021784165315	False	52674667,52584715,52584787,52585760,52585990,52586682,52593119,52593138,52593230,52593962,52596173,52596398,52596914,52597664,52598540,52598608,52598668,52599789,52599922,52600064,52600999,52602274,52603352,52604180,52604861,52605005,52605136,52605943,52605974,52606292,52606366,52606857,52607682,52607685,52608949,52609157,52609362,52610415,52610651,52611413,52612159,52612178,52613656,52614670,526…		3_52733078_C_CATGCTT;		3_52739520_T_C;3_52728804_C_T;	3_52739520_T_C;3_52738165_T_C;3_52734954_G_C;3_52733078_C_CATGCTT;3_52733078_C_T;3_52731598_T_C;3_52731483_C_T;3_52731269_T_C;	3_52728804_C_T;		0.3960396039603961	3	-1	52728505	52740048			3.4806788383934073
ENSG00000017797	ENSG00000017797	Q15311	18_9478947_A_G	rs7236410	0.0032956767418115137	0.0007565049854491839	1.0	2.37929758597624e-06	0.28767411616715377	0.0023879150710597805	0.2721942501719636	0.0015018761897399905	0.8153487326161899	0.1467829157223495	0.2332974035015034	202	4724342.507210455	0.1170873871528053	14	0.16568568106096646	True	9478947,9465073,9480935,9486581,9487443,9489053,9491122,9493900,9496621,9497220,9497364,9498749,9500550,9500986,9503942,9504278,9505407,9507169,9507423,9508812,9513442,9515571,9515929,9516309,9516577,9520003,9523655,9535143,9537835,9538612,9539701,9539749,9540124,9540696,9540747		18_9523655_CTATAA_C;		18_9537835_G_C;	18_9535143_A_G;18_9523655_CTATAA_C;18_9520003_C_G;18_9516309_A_G;18_9515929_A_C;18_9515571_T_A;18_9513442_A_G;18_9507423_A_C;18_9507169_A_G;18_9505407_C_G;18_9504278_A_G;18_9503942_A_G;18_9500986_A_G;18_9500550_G_C;18_9498749_A_G;18_9497364_A_G;18_9497220_C_G;18_9496621_C_G;18_9493900_T_C;18_9491122_T_G;18_9489053_T_G;18_9487443_A_G;18_9486581_G_T;18_9480935_T_G;18_9478947_A_G;			0.09158415841584157	18	1	9475007	9538114			4.849040564356436
ENSG00000018236	ENSG00000018236	Q12860	12_41146220_T_A	rs2053628	0.012837216306566524	0.0035613019602671967	1.0	7.333057755273378e-06	-0.5245023240194301	0.00017461332200597367	-0.5623527296503938	1.0542188939363384	-0.3696288816528829	0.011128214557420132	-0.4267247732547709	175	565598.6386003257	0.42633470438465343	5	0.4390868293401004	False	41146220					12_41146220_T_A;			0.150990099009901	12	1	41086244	41466220			1.4382576455445544
ENSG00000018510	ENSG00000018510	O00116	2_178323205_G_A	rs60822572	0.015207969740719878	0.0043436083538986895	1.0	4.13616366073016e-05	0.4668748852572772	0.2572500036645893	0.27559354017188464	0.0736940288771536	0.6546757793250138	0.3993726092968778	0.13860282878496566	202	36510917.18063714	0.10730164953101948	32	0.09693492025831067	True	178323205,178324357,178335653					2_178335653_T_C;2_178324357_C_T;2_178323205_G_A;			0.04950495049504952	2	1	178257372	178408564			3.602411135258089
ENSG00000018625	ENSG00000018625	B1AKY9	1_160086968_G_A	rs1016732	0.04516264277529426	0.01572736301726565	1.0	2.032905597113498e-05	0.2904757279463051	4.144269755294197e-06	0.3749337610319644	0.1979096735473784	0.5073612470836821	0.035006383494318886	0.20511439967579714	202	13842850.72338795	0.2550275207729213	23	0.3909577970801111	False	160086968,160077854,160094343,160097666					1_160097666_G_A;1_160094343_T_C;1_160086968_G_A;			0.2549504950495049	1	1	160085549	160113381			4.003517545123226
ENSG00000018699	ENSG00000018699	Q6P3X3	2_32903548_G_A	rs111896629	5.924223478928898e-14	1.7891251990678394e-15	1.0	3.001611278748489e-23	-1.0392949107409526	1.1352823908655884e-16	-0.7522391548407669	2.2296377483849803e-05	-0.7489840113032846	2.1380256268588664e-08	-0.6729864246657709	202	12554908.602126142	0.1854267124213519	25	0.14355822091271447	False	32903548,32891365					2_32891365_T_G;2_32903548_G_A;	2_32891365_T_G;2_32903548_G_A;		0.1113861386138614	2	1	32853099	33046118	1.0	2_32903548_G_A	3.794878461744138
ENSG00000019582	ENSG00000019582	P04233-2	5_149765427_C_G	rs57490146	0.03768070635496572	0.012654330625353698	1.0	3.541511164325661e-05	-0.3917913933725365	0.00010991704201338908	-0.4420339168809158	0.1066854070984368	-0.2309563430723707	0.09070809539330447	-0.18174591200487644	202	2549233.462612494	0.28229998950899016	4	0.26109345249251925	False	149765427,149766175,149771286,149781627,149784414		5_149781570_GGGACCTCACGCCCCTGTTGACAGATGGAGATTGGGCAGCAGGGCCTTGCTGCATTGTTATCTGCTGTTCCGACTTGGTTTGTCTTGTCCAAGGGTGACGAAAGAGCCAGGCACCAGGGTCTCATGGGATGAGGTACAGGGTGGGAGATGGGGGAGGGGCTGGGGGCTGAAGGGAGCAAGAAAGCTGTAGCTGTGTGGGGCTGGCAGGATGTTGAAGACCGCCTCTGCTGCTCTCACATGGGGACTGGAGAGAGAAGCAGCAGGTTGAGGTTGGGGTCACCCATTTGTTGTCCCTGCCCCTTTCTAACATCCTGGACCTGCAGAGCAGTTAAGGACTGTCCACCCTCCCCTGCCCCCTGCTCAGGTCCAATAATGACCATCATGGAT…	5_149781570_GGGACCTCACGCCCCTGTTGACAGATGGAGATTGGGCAGCAGGGCCTTGCTGCATTGTTATCTGCTGTTCCGACTTGGTTTGTCTTGTCCAAGGGTGACGAAAGAGCCAGGCACCAGGGTCTCATGGGATGAGGTACAGGGTGGGAGATGGGGGAGGGGCTGGGGGCTGAAGGGAGCAAGAAAGCTGTAGCTGTGTGGGGCTGGCAGGATGTTGAAGACCGCCTCTGCTGCTCTCACATGGGGACTGGAGAGAGAAGCAGCAGGTTGAGGTTGGGGTCACCCATTTGTTGTCCCTGCCCCTTTCTAACATCCTGGACCTGCAGAGCAGTTAAGGACTGTCCACCCTCCCCTGCCCCCTGCTCAGGTCCAATAATGACCATCATGGAT…	5_149781627_T_C;5_149781570_GGGACCTCACGCCCCTGTTGACAGATGGAGATTGGGCAGCAGGGCCTTGCTGCATTGTTATCTGCTGTTCCGACTTGGTTTGTCTTGTCCAAGGGTGACGAAAGAGCCAGGCACCAGGGTCTCATGGGATGAGGTACAGGGTGGGAGATGGGGGAGGGGCTGGGGGCTGAAGGGAGCAAGAAAGCTGTAGCTGTGTGGGGCTGGCAGGATGTTGAAGACCGCCTCTGCTGCTCTCACATGGGGACTGGAGAGAGAAGCAGCAGGTTGAGGTTGGGGTCACCCATTTGTTGTCCCTGCCCCTTTCTAACATCCTGGACCTGCAGAGCAGTTAAGGACTGTCCACCCTCCCCTGCCCCCTGCTCAGGTCCAAT…	5_149784414_C_T;5_149781627_T_C;5_149781570_GGGACCTCACGCCCCTGTTGACAGATGGAGATTGGGCAGCAGGGCCTTGCTGCATTGTTATCTGCTGTTCCGACTTGGTTTGTCTTGTCCAAGGGTGACGAAAGAGCCAGGCACCAGGGTCTCATGGGATGAGGTACAGGGTGGGAGATGGGGGAGGGGCTGGGGGCTGAAGGGAGCAAGAAAGCTGTAGCTGTGTGGGGCTGGCAGGATGTTGAAGACCGCCTCTGCTGCTCTCACATGGGGACTGGAGAGAGAAGCAGCAGGTTGAGGTTGGGGTCACCCATTTGTTGTCCCTGCCCCTTTCTAACATCCTGGACCTGCAGAGCAGTTAAGGACTGTCCACCCTCCCCTGCCC…	5_149784414_C_T;5_149781570_GGGACCTCACGCCCCTGTTGACAGATGGAGATTGGGCAGCAGGGCCTTGCTGCATTGTTATCTGCTGTTCCGACTTGGTTTGTCTTGTCCAAGGGTGACGAAAGAGCCAGGCACCAGGGTCTCATGGGATGAGGTACAGGGTGGGAGATGGGGGAGGGGCTGGGGGCTGAAGGGAGCAAGAAAGCTGTAGCTGTGTGGGGCTGGCAGGATGTTGAAGACCGCCTCTGCTGCTCTCACATGGGGACTGGAGAGAGAAGCAGCAGGTTGAGGTTGGGGTCACCCATTTGTTGTCCCTGCCCCTTTCTAACATCCTGGACCTGCAGAGCAGTTAAGGACTGTCCACCCTCCCCTGCCCCCTGCTCAGGTCCAAT…		0.11633663366336636	5	-1	149781200	149792492			3.6843176287128707
ENSG00000020922	ENSG00000020922	F8W7U8	11_94184453_G_A	rs2067035	0.02394298461404631	0.00734853162332078	1.0	2.098937741552174e-05	-0.3692810688334254	2.867178091222111e-07	-0.4605411019010538	0.3956272169719202	-0.7832840845401767	0.4945729725466113	0.06877564682458892	202	27013185.232052963	0.15265253919266902	26	0.10581521365228837	False	94184453,94131497,94132284,94133124,94140111,94143317,94143833,94145025,94147464,94165326,94196748,94209348					11_94209348_T_C;11_94196748_T_C;11_94165326_T_C;11_94184453_G_A;			0.2227722772277228	11	-1	94152895	94227074			3.824742732673268
ENSG00000021355	ENSG00000021355	P30740	6_2842139_C_T		3.909549396340819e-14	1.1532324100174253e-15	1.0	3.4651580890276836e-18	-0.7234549278830871	2.148385269967034e-18	-0.9327946720045412	4.291510791710682e-08	-0.6166431126998431	3.163860404333518e-13	-0.6350079599460687	202	9730849.821383884	0.20528822746257447	17	0.14802307638183165	False	2842139				6_2842139_C_T;				0.2871287128712871	6	-1	2832566	2842240	1.0	6_2842139_C_T	2.7985385891089107
ENSG00000021574	ENSG00000021574	Q9UBP0-3	2_32431017_C_T	rs55796887	3.122706036434553e-05	4.415578710070164e-06	1.0	2.8159138388314365e-08	-0.28992204257727233	2.2282719031791472e-07	-0.20528212028753207	0.9424107334447516	-0.16279749085002224	0.38579468165079295	-0.06660979132556255	202	6086590.453982129	0.10842610183474154	19	0.1512956914575351	True	32431017,32388923								0.4777227722772277	2	1	32288680	32382706			3.6208157368417195
ENSG00000021776	ENSG00000021776	O60306	15_35287753_T_C	rs8037200	0.0015671213153937327	0.0003265218238792982	1.0	6.379803028952489e-09	-0.4964005450325063	8.984386300903579e-06	-0.3078499144965909	0.07302771795780379	-0.7752329122158459	0.11779898207771985	-0.19441915051819209	202	28626706.84000963	0.11454642358613296	58	0.09027540994729484	True	35287753,35270521,35270904,35272702,35278923,35284307,35284597,35289441,35290946,35291874,35294206,35300078,35302325,35302568,35306104,35308033,35310312								0.14356435643564355	15	-1	35147732	35262040			4.019900945544555
ENSG00000021826	ENSG00000021826	P31327-3	2_211335552_C_G	rs62203670	1.6676138957175466e-09	1.0521408050939453e-10	1.0	3.719882224330846e-15	0.53890462720007	8.531328051513777e-12	0.4653009696232966	3.7948846063736793e-06	0.557821341876565	1.0161479654723886e-07	0.4919706575599372	202	10322474.633079413	0.2198944277879996	31	0.16073925041066894	False	211335552,211320374,211324958,211326107,211327050,211328965,211330342,211331248,211332890,211333049,211334090,211334708,211335382,211335543,211335755,211335831,211335864,211335917,211339162,211340655,211340678,211341156,211341349,211341599,211342138,211342502,211342925,211343357,211343550,211344114,211344115,211344171,211344533,211345006,211345026,211345699,211345996,211346051					2_211346051_T_C;2_211345996_A_C;2_211345699_T_C;2_211345026_C_A;2_211345006_T_C;2_211344533_A_T;2_211344171_G_C;2_211344115_C_A;2_211344114_A_G;2_211343550_G_T;2_211343357_A_G;2_211342925_T_C;2_211342502_G_A;			0.4826732673267327	2	1	211342406	211543831	0.6303428511046956	2_211429515_G_A	1.9746258434870037
ENSG00000022277	ENSG00000022277	A0A0A0MQR2	20_55046735_T_C	rs6069758	0.030034257246583373	0.00962499474194265	1.0	5.68478607751119e-06	0.2765995547990487	2.297831542820621e-05	0.3327626747894895	0.2756888109524902	0.2254792263112131	0.09498678466180074	0.1101236739115361	202	4930311.8446788015	0.13911731922220294	11	0.15017340701378293	False	55046735,55029388,55029758,55031145,55031436,55036547,55040168,55040608,55056589,55057904,55067135,55067481,55067936,55069310,55070076,55070268,55070539,55070664,55070798,55070946,55071253,55071639,55073827,55075250,55077917,55078573,55078789,55079036,55079380,55081353,55082051,55083478,55084667,55086063,55086281,55087041,55087964,55088798,55093901,55096228,55097478,55097788,55101317,55101462,551…		20_55084667_C_CA;20_55067936_TA_T;		20_55093901_A_G;	20_55088798_T_C;20_55087964_T_C;20_55087041_A_C;20_55086281_G_T;20_55086063_T_C;20_55084667_C_A;20_55084667_C_CA;20_55083478_G_T;20_55082051_T_C;20_55081353_C_T;20_55079380_G_A;20_55079036_A_G;20_55078789_T_A;20_55078573_G_A;20_55077917_C_T;20_55075250_A_G;20_55073827_T_A;20_55071639_A_G;20_55071253_A_G;20_55070946_C_G;20_55070798_C_T;20_55070664_C_G;20_55070539_G_C;20_55070268_A_T;20_55070076_G_…			0.4282178217821782	20	1	55043647	55093943	0.16046298080531868	20_55030037_A_G	3.8907917722772276
ENSG00000022556	ENSG00000022556	Q9NX02-5	19_55486167_G_C	rs775893	0.0649813957073339	0.024150290456606008	1.0	0.00010340315445336103	0.4332166971836005	0.00048780602679041697	0.469518810368629	0.00041645649220724935	0.768416333117142	0.0003787339355800808	0.4215364266012613	202	46843829.75867137	0.4914280736594576	39	0.2197021909859428	True	55486167,55483013					19_55483013_G_C;19_55486167_G_C;	19_55483013_G_C;19_55486167_G_C;		0.2747524752475248	19	1	55464498	55512510			3.50768277490099
ENSG00000022976	ENSG00000022976	A8K0R7-5	14_102774950_A_T	rs8005856	8.420223311746253e-05	1.3286270659292927e-05	1.0	1.1905320173856134e-07	-0.5626321897199131	1.4421043863398084e-05	-0.5403659695590025	0.4854352199675431	0.17696160715577558	0.9331505202624216	0.01740363070860762	78	398028.5119878092	0.3374740632553845	1	0.36673072764747583	False	102774950,102774260,102774862,102776924,102780553								0.14108910891089108	14	1	102783714	102809044			1.9090465396039604
ENSG00000023041	ENSG00000023041	Q9H6R6-2	10_114206121_A_G		0.003495602338560444	0.0008097620306696849	1.0	1.51460126141143e-06	-0.32064495477221605	6.368481783322643e-05	-0.3083813926315209	0.28514857607860683	-0.4414194536096692	0.4406774311227427	-0.12576401068309373	104	577687.3040839271	0.3417071419132636	2	0.6566440252150854	False	114206121					10_114206121_A_G;			0.2698019801980198	10	-1	114190058	114206672			3.5020779207920794
ENSG00000023191	ENSG00000023191	P13489	11_449811_A_G	rs7482616	0.02541428866513677	0.007880422647073313	1.0	2.6396947222277054e-06	0.3457571955884625	1.1783832944397286e-11	0.7149537603240115	0.017240160010665338	0.34108939856901666	0.0196369088786195	0.1712199291529286	202	20746375.650069952	0.14255772291439195	19	0.08871969888217572	True	449811,438755,441806,443731,496924					11_496924_G_C;	11_496924_G_C;		0.3465346534653465	11	-1	494512	507300			2.5634743514851484
ENSG00000023228	ENSG00000023228	P28331-2	2_206988573_C_A	rs1044120	2.04719956692342e-11	9.465572151875815e-13	1.0	8.98667434944626e-22	-0.6057214908025929	1.743006328446277e-19	-0.4011639053584853	0.7789361596108674	-0.4030110640446285	0.21449997912550267	-0.10510551938758984	202	52576438.35263147	0.14023445174282212	35	0.1033701082692838	True	206988573				2_206988573_C_A;				0.4678217821782178	2	-1	206979541	207024327			3.605476174974117
ENSG00000023516	ENSG00000023516	Q9UKA4	13_42933413_G_A	rs7995775	0.052459002390931854	0.018685794717968586	1.0	3.9291260334514614e-05	-0.2068233715729224	0.0004485837182881762	-0.14648845022192902	0.3590578744101469	-0.12063967251578278	0.9032117921394442	0.012716020521221337	171	935552.646478768	0.3889987375589426	3	0.4900577327005988	False	42933413,42919560,42919975,42920953,42925064,42926341,42930322,42933469,42936116,42936373,42937043								0.3465346534653465	13	1	42846289	42897396			2.8707233118811883
ENSG00000023572	ENSG00000023572	Q9NS18	1_193250802_A_C	rs6428161	0.002737334370073452	0.0006116787208791079	1.0	6.042266441671697e-06	0.24131707601457605	0.002916735517634747	0.1992158422678161	1.0561722259266697	-0.0721088654160299	0.6669910335678273	-0.05999004261422791	95	229950.961062608	0.3471680812410111	2	0.3214041708470249	False	193250802,193034802,193035395,193036952,193051685,193052205,193057207,193057513,193057971,193061330,193072784,193074371,193074651,193075108,193075444,193077301,193077913,193078985,193079219,193082883,193083022,193084279,193089481,193092741,193093298,193095515,193096255,193096889,193105216,193111725,193114050,193116326,193119992,193120533,193120560,193120667,193122447,193127343,193127517,193128814…	1_193074651_T_A;			1_193075108_C_T;	1_193074371_A_G;1_193072784_T_A;			0.297029702970297	1	-1	193065598	193075244			1.8055180059523566
ENSG00000023892	ENSG00000023892	Q9H4E7	6_35289446_T_C		0.02008494946578878	0.005971645984209704	1.0	2.8149385469470434e-05	0.3713095937572165	0.000500939240038113	0.3911159058954662	0.07131224104022604	0.44441283908707785	0.1534246355767597	-0.20025811279655206	202	2587256.9403713816	0.1925263072412865	12	0.3786929595272008	False	35289446,35174642,35178029,35188925,35193773,35194632,35203745,35205881,35228828,35239994,35245737,35247166,35256934,35258539,35282463,35282993,35283240,35284898,35285720,35381099	6_35285720_A_C;	6_35284898_A_AGTT;		6_35289446_T_C;	6_35284898_A_AGTT;6_35284898_A_T;6_35282993_A_G;6_35282463_C_G;			0.12128712871287127	6	1	35265595	35289548			2.083718173267327
ENSG00000023909	ENSG00000023909	P48507	1_94405726_G_A	rs11165037	1.0365413094495808e-08	7.643930995589791e-10	1.0	5.226545542628981e-13	-0.7571299175834432	4.255950922507507e-11	-0.7951661568963634	0.4635510549171807	-0.15431346630817355	0.184311332953722	-0.13348666739555434	202	7320176.020721459	0.16193944910970026	8	0.12602158132275165	False	94405726								0.099009900990099	1	-1	94350761	94374966			2.5175582316186436
ENSG00000025156	ENSG00000025156	Q03933-2	6_122646324_C_T		0.04105103683721435	0.013992815084861077	1.0	1.3655071532558333e-05	-0.3753944456443259	0.006270819789315253	-0.2747427882336784	0.3754361304920829	-0.3152258827335803	0.4365319254995621	0.14446898661767427	96	1672086.8455403312	0.3025731459439033	2	0.2643083112866518	True	122646324								0.2103960396039604	6	1	122720691	122754264			3.554148826732673
ENSG00000025772	ENSG00000025772	Q15785	20_43589041_G_A	rs2234197	0.06627698492087952	0.024748165971860667	1.0	0.00031388050884254064	-0.2758042845870276	3.487540205488097e-05	-0.3855675128330926	0.008753735863007194	-0.3609220925818144	0.06209891813955332	-0.16806621082359066	202	16078610.493747942	0.1364251865048638	18	0.4104404734564224	False	43589041				20_43589041_G_A;				0.2277227722772277	20	-1	43570771	43589127			4.512938138613862
ENSG00000026025	ENSG00000026025	P08670	10_17033429_G_A		0.05720986200885261	0.0206793929396391	1.0	0.00015629295764895348	0.39099084012149016	0.0017358123900131088	0.3705195950631611	0.10350066155547248	0.7254806840423296	0.013474556260269091	0.346893018303344	202	248521741.59990668	0.5581274932658393	53	0.21963311654014528	True	17033429,17013099,17025685,17033064,17033723								0.13613861386138615	10	1	17270258	17279592			5.542976306930693
ENSG00000026297	ENSG00000026297	A0A087WZM2	6_167413230_A_G		0.00011520418111191716	1.87039914786643e-05	1.0	1.7165609836407806e-09	0.3339606102437721	5.7747810266981224e-05	0.3343469599758505	0.6389947429362427	0.11522242705524287	0.2755807087349651	0.07816846701977552	202	5054088.5964908535	0.24761754735653546	8	0.16344110065207929	False	167413230,167413132,167413539,167415403,167415440,167417551,167419105,167420064,167422922,167424293,167426438,167426599,167426707,167429303,167429467,167431147,167431829,167431910,167431949,167432036,167432766,167433925,167433948,167434112,167434135,167434686,167435325,167436159,167436461,167437162,167437988,167440128,167440244,167440501,167440736,167440960,167441023,167441624,167442107,167442115…								0.405940594059406	6	-1	167342992	167370679			1.6090303514851485
ENSG00000028277	ENSG00000028277	H0YNW1	19_42593716_A_G	rs16975663	0.07025999589106294	0.02665488080099906	1.0	0.0010600573317264726	-0.21651786030283202	0.01279552420841294	-0.4091316372772186	0.576090017185148	0.16034769989939868	0.7797914839677311	-0.06241454048165496	96	626134.4006263845	0.7392618022156314	1	0.5952889883959637	False	42593716,42500373,42504505,42506044,42512281,42515669,42517524,42535234,42542466,42543452,42544877,42550432,42556501,42558629,42561438,42562481,42563142,42570571,42576952,42579927,42587193,42588999,42594894,42603073,42606037,42606369,42635623,42637232,42638270,42638310,42638486,42639946,42639971,42640658,42644640,42644685,42645537,42650466,42650753,42651599,42651600,42651872,42654905,42655400,426…				19_42594894_T_G;19_42593716_A_G;	19_42635623_C_T;19_42606369_T_C;19_42606037_G_A;19_42603073_T_A;	19_42635623_C_T;19_42606369_T_C;19_42606037_G_A;19_42603073_T_A;		0.13861386138613865	19	-1	42590263	42700737			1.285438572277228
ENSG00000028310	ENSG00000028310	Q9H8M2	5_840575_T_C	rs114217313	0.0049439966288350465	0.0012074937578686422	1.0	2.175867600935804e-06	0.8306523027681212	9.026055313862663e-07	0.9989242653042384	0.8246514954724614	0.5588831132298637	0.049911500969579366	0.3361353032878633	202	3250083.884829592	0.1965446137841323	13	0.3790876018261836	False	840575,790010,790589,797747,804816,806225,812316,814632,814653,822172,824096,833285,834502,834966,836029,837849,837923,840973,841614,843152,848962,849248,849504,849605,849627,849709,850066,850280,851114,852180,853723,854138,854550,855235,855420,856045,857245,857853,858251,858497,858559,861130,861283,861467,861905,862182,862220,862414,862682,862841,862957,863097,863797,864466,865970,866718,866971,…		5_890353_CAGG_C;		5_892846_C_T;5_864466_G_A;	5_890888_T_C;5_890634_T_G;5_890356_G_A;5_890353_CAGG_C;5_890124_T_C;5_890030_G_C;5_889497_C_A;5_889396_G_A;5_889369_C_T;5_889091_C_T;5_886391_G_A;5_886226_G_A;5_885632_G_A;5_884684_T_C;5_884439_A_C;5_884359_G_A;5_883300_T_G;5_880975_A_G;5_878183_T_C;5_877492_G_A;5_876462_T_G;5_875589_A_T;5_873784_C_G;5_873451_T_C;5_873352_C_T;5_872765_T_G;5_872630_G_C;5_872168_G_A;5_871905_G_A;5_871598_T_C;5_8713…	5_878183_T_C;5_877492_G_A;5_876462_T_G;5_875589_A_T;5_873784_C_G;5_873451_T_C;5_873352_C_T;5_872765_T_G;5_872630_G_C;5_872168_G_A;5_871905_G_A;5_871598_T_C;5_871348_T_C;5_870619_A_G;5_870555_A_G;5_869546_C_T;5_866971_A_T;5_866718_G_A;5_865970_G_A;	5_870619_A_G;	0.04950495049504952	5	-1	850406	892939			2.6388467376237625
ENSG00000028528	ENSG00000028528	Q13596	15_64352932_G_A	rs2414835	4.4698474426977695e-08	3.6886836557438e-09	1.0	1.0924492127663171e-14	-0.6097813720286185	1.7174383930907187e-09	-0.3989324295148189	0.005762909556022701	-0.4352001556425078	1.7106398499712087e-09	-0.41302648186817503	202	17978225.56514645	0.11349883972224716	21	0.121143838946607	True	64352932,64351745,64353201,64357712,64358722,64360155,64361441,64364370,64365340,64366293,64369998,64370822,64371615,64373822,64374034,64375216,64379705,64379865,64381148,64382738,64383215,64383362,64383458,64384172,64389087,64389434,64391096,64391667,64394580,64398539,64399944,64411521,64416621,64418221,64427426,64427587,64430607,64434537,64436455,64439532,64440424,64441036,64508763,64524980		15_64434536_AG_A;15_64394580_TC_T;		15_64434537_G_A;15_64434536_AG_A;15_64430607_T_C;	15_64436455_C_A;15_64434537_G_A;15_64434536_AG_A;15_64430607_T_C;15_64427587_C_G;15_64427426_C_T;15_64418221_C_G;15_64416621_G_A;15_64411521_A_G;15_64399944_G_A;15_64398539_A_C;15_64394580_TC_T;15_64391667_A_G;15_64391096_T_C;15_64389434_G_A;15_64389087_T_G;	15_64434537_G_A;15_64434536_AG_A;15_64430607_T_C;15_64427587_C_G;15_64427426_C_T;15_64418221_C_G;15_64416621_G_A;15_64411521_A_G;15_64399944_G_A;15_64398539_A_C;15_64394580_TC_T;15_64391667_A_G;15_64391096_T_C;15_64389434_G_A;15_64389087_T_G;		0.2896039603960396	15	1	64386322	64438289	0.9888705783245298	15_64418221_C_G	2.889573336633664
ENSG00000029534	ENSG00000029534	P16157-3	8_41609623_C_T	rs60792897	8.306114322770655e-11	4.161321468039144e-12	1.0	9.125515919474179e-20	-0.7925159133237165	1.317723242012384e-14	-0.7168217396783578	7.701877528824648e-11	-0.9335127748607536	2.771155221461583e-06	-0.4650159122108004	202	2511513.5031291223	0.2389714877077465	15	0.22235833873052085	False	41609623,41609843,41610643,41612255,41613496,41614567					8_41614567_G_A;8_41613496_T_C;8_41612255_C_T;8_41610643_C_T;8_41609843_G_A;8_41609623_C_T;			0.3886138613861386	8	-1	41510739	41754280	0.9367602204234876	8_41614567_G_A	1.4883354688118813
ENSG00000029639	ENSG00000029639	Q8WVM0	6_155635585_A_C		4.850425091957133e-24	2.252326865427697e-26	1.0	7.614830097014476e-36	-0.9667589687872848	1.4023947221623707e-33	-1.0508668896132851	5.141480376954712e-12	-0.8347780190156615	1.0522466307749586e-12	-0.70035666461487	202	9928235.50154328	0.15257385879087046	15	0.12859248476430998	False	155635585,155624598,155625104,155627230,155629985,155632938,155635281,155635624,155635637,155635808,155635812,155635813,155637025,155637821,155642699		6_155635281_G_GTC;6_155624596_TCC_T;		6_155635585_A_C;	6_155635281_G_GTC;6_155632938_T_C;6_155629985_C_T;6_155627230_G_A;6_155625104_A_G;6_155624598_C_T;6_155624596_TCC_T;			0.3910891089108911	6	-1	155578643	155635627	0.9776259950892522	6_155635624_A_G	3.300455782178218
ENSG00000030066	ENSG00000030066	Q12769	11_47650993_C_T	rs3817334	8.88442250181962e-05	1.4122727095248794e-05	1.0	1.844675218785629e-07	0.2585077899374221	0.00017361851273518876	0.17307575024313115	0.6469872071069906	0.7184189217138783	0.2322095654735763	0.09993441874914044	202	41898213.06011989	0.09466029837690948	48	0.14865994122779602	True	47650993,47527052,47529947,47566352,47604639,47611152,47622412,47665686,47669175,47669619								0.4282178217821782	11	-1	47799639	47870107			4.77609497029703
ENSG00000030110	ENSG00000030110	Q16611	6_33546837_T_C		5.86070770028344e-08	4.9736779617294785e-09	1.0	7.993330105004959e-14	-0.409834147315252	3.4137418336714788e-15	-0.5891112318341488	0.811927118096955	-0.2304010077657783	0.5170283903176693	-0.05606400924491739	202	1896390.1265604687	0.24871474300627155	6	0.27787627150531524	True	33546837,33540209,33541507,33546930				6_33541507_A_G;	6_33546930_T_C;6_33546837_T_C;			0.25742574257425743	6	-1	33540329	33548019			4.388146014851485
ENSG00000031691	ENSG00000031691	Q7L2Z9	6_49456545_G_A		1.0984248178732511e-17	1.6972032770603904e-19	1.0	3.709095511240467e-28	0.8136657070131866	1.8000549241641643e-27	0.7916525859996123	4.5672781820214496e-06	0.7476866223960057	0.0014892266725826668	0.3010647496588518	202	2151485.3728666967	0.20090603433323154	9	0.3194718047047804	True	49456545,49342165,49345141,49347535,49350785,49353014,49361552,49370279,49370724,49370737,49371403,49371854,49372796,49375279,49376281,49376681,49379536,49382193,49383804,49384048,49385182,49386564,49387292,49393500,49398115,49400237,49403282,49406056,49406348,49407053,49407069,49413244,49413289,49413391,49421607,49423547,49425521,49426018,49427409,49433198,49436199,49446509,49446995,49450368,494…	6_49459978_A_G;	6_49450368_CTCGGCGA_C;		6_49460152_A_G;	6_49457835_A_G;6_49454667_C_A;6_49453672_A_T;6_49451240_C_T;6_49451187_G_A;6_49450368_CTCGGCGA_C;6_49446995_A_G;6_49446509_G_A;6_49436199_T_C;6_49433198_T_C;6_49456545_G_A;			0.3836633663366337	6	1	49431091	49460820			3.7370501336633666
ENSG00000032389	ENSG00000032389	A8MUM1	2_3268255_G_A	rs2694092	3.3068616570620627e-07	3.212800158447281e-08	1.0	3.3872319531971312e-12	-0.4371617878439769	4.5596747876338224e-09	-0.5075480020330376	0.22123821925692347	-0.26086782731765257	0.0462833370420816	-0.180320161962503	202	5231132.626585146	0.1065288493532971	12	0.12106763355428694	False	3268255,3212247,3230426,3236201,3245158,3247073,3247171,3247274,3248505,3250154,3251940,3255080,3257136,3257281,3257447,3257667,3257726,3257916,3258174,3258627,3258742,3258961,3259205,3260725,3260741,3260822,3262514,3263777,3263980,3265893,3267038,3267052,3267621,3269034,3269482,3269721,3271738,3272756,3272847,3273950,3274066,3274071,3275826,3276255,3277301,3277451,3277639,3277794,3277884,3279283…		2_3277451_TA_T;2_3277301_CA_C;2_3277300_GC_G;2_3267621_T_TCTTA;2_3267050_CTGGTGACTGGT_C;2_3258961_CT_C;2_3247171_CAGGTGGATCA_C;		2_3212247_G_T;	2_3284341_T_C;2_3281624_A_G;2_3281452_G_A;2_3281342_C_G;2_3279283_T_C;2_3277884_A_G;2_3277794_G_A;2_3277639_G_A;2_3277451_TA_T;2_3277301_CA_C;2_3277300_GC_G;2_3276255_T_C;2_3275826_T_G;2_3274071_T_G;2_3274066_A_G;2_3273950_T_C;2_3272847_T_C;2_3272756_A_G;2_3271738_T_C;2_3269721_C_T;2_3269482_T_C;2_3269034_G_A;2_3267621_T_TCTTA;2_3267621_T_A;2_3267052_G_A;2_3267050_CTGGTGACTGGT_C;2_3267038_A_G;2_3…	2_3284341_T_C;2_3281624_A_G;2_3281452_G_A;2_3281342_C_G;2_3279283_T_C;2_3277884_A_G;2_3277794_G_A;2_3277639_G_A;2_3277451_TA_T;2_3277301_CA_C;2_3277300_GC_G;2_3276255_T_C;2_3275826_T_G;2_3274071_T_G;2_3274066_A_G;2_3273950_T_C;2_3272847_T_C;2_3272756_A_G;2_3271738_T_C;2_3269721_C_T;2_3269482_T_C;2_3269034_G_A;2_3267621_T_TCTTA;2_3267621_T_A;2_3267052_G_A;2_3267050_CTGGTGACTGGT_C;2_3267038_A_G;2_3…		0.457920792079208	2	-1	3192696	3381653			2.3321847409819734
ENSG00000032742	ENSG00000032742	Q13099-2	13_21483892_G_A	rs4769136	5.144807785424948e-05	7.696434917210678e-06	1.0	1.2818765143768191e-08	0.4381233971433441	1.291098274102952e-05	0.39899438365470574	0.43655274361338015	0.6224876809979945	0.017024662373860744	0.2330105999353793	194	1809109.659799715	0.2446576661320591	9	0.3474382208492572	True	21483892,21483320,21484866,21485395,21485926,21490846								0.2722772277227723	13	1	21140585	21265503			1.2770744247524755
ENSG00000033100	ENSG00000033100	Q9P2E5	7_150931268_C_G	rs2608293	3.265778676067868e-06	3.7539443519824967e-07	1.0	9.637078859228832e-11	-0.3689499033464389	9.153795205621946e-08	-0.28450606436317444	0.001993734847248792	-0.4568743883316427	0.00045129775842556885	-0.3315197499023421	194	991172.3002971192	0.2655216870003587	5	0.416585669996093	False	150931268,150910454,150910642,150915471,150915533,150916114,150916228,150920503,150926775,150928545,150929476,150931646,150931659,150931735,150933258,150933283,150934975,150936052,150939193,150941238,150941406,150944654,150952830,150955289					7_150933283_G_A;7_150933258_T_C;7_150931735_G_A;7_150931659_T_C;7_150931646_T_C;7_150931268_C_G;	7_150933283_G_A;7_150933258_T_C;	7_150934975_C_G;7_150931268_C_G;	0.3935643564356436	7	1	150929575	150935908	0.488883043192635	7_150948000_T_C	2.530101777227723
ENSG00000033178	ENSG00000033178	A0AVT1	4_68528460_C_T	rs9991141	0.029687733091889518	0.009483533139150941	1.0	9.25393425053602e-06	0.2634568426682131	0.002318949753735109	0.2551541650440647	0.0017255183176102455	0.5865087230666917	1.5877210311156516e-07	0.3811989476803763	202	59769646.17829518	0.1153346484926568	46	0.11067964489617203	False	68528460,68479934,68481557,68481784,68481813,68482401,68482405,68483472,68483534,68483803,68489007,68490122,68493076,68494236,68497389,68497597,68500171,68500798,68502665,68502901,68504232,68504380,68506040,68506130,68510597,68512252,68512837,68513124,68515054,68516722,68517721,68520178,68520419,68520649,68521207,68525122,68526784,68528284,68530712,68534392,68535664,68537817,68539785,68540692,685…	4_68534392_C_T;	4_68562130_CAT_C;4_68556488_T_TAAAAC;4_68550147_CT_C;4_68535664_TA_T;4_68520649_CAA_C;4_68520419_GTAAATGGGCTAAATACCCCAAT_G;4_68517721_G_GCT;4_68510597_GA_G;4_68510496_CCTATGGAGGAGAAAAATGGTATATATCAGATTAAAATAACCTATCTGTGAATCATTTTACTTTGAAATATTTAACAGGTTTATTTTACCACTGTTTCAACGAAAAAAAAAAGTATAAACCAAATAAGGAAAAGCATAATTGTACAATTTCTTTAAACAGAAGACATTTAAAAATTCCAAATAAAATTTAAACATTGAACTGCTTATGTAAGATAGAAATAAACACAATATA…	4_68534392_C_T;4_68510496_CCTATGGAGGAGAAAAATGGTATATATCAGATTAAAATAACCTATCTGTGAATCATTTTACTTTGAAATATTTAACAGGTTTATTTTACCACTGTTTCAACGAAAAAAAAAAGTATAAACCAAATAAGGAAAAGCATAATTGTACAATTTCTTTAAACAGAAGACATTTAAAAATTCCAAATAAAATTTAAACATTGAACTGCTTATGTAAGATAGAAATAAACACAATATAATGTTAATACAACATTTAAAAAAAAGATTCCTCCCTTTTGGACATTTCTCAAAACTCATTTACTGAATAAAACTATTCTAAGACTTCTACTATTATCTAAAATTGATAATACTAGATTCCATATGCATGTAAAAAGCTCAG…	4_68483803_GAAA_G;4_68483534_G_A;4_68483472_A_G;4_68482405_G_C;4_68482401_T_C;4_68481813_T_C;4_68481784_T_G;4_68481557_CAAAG_C;4_68479934_C_T;	4_68566689_G_A;4_68562921_C_A;4_68562130_CAT_C;4_68558839_C_T;4_68556488_T_TAAAAC;4_68555508_T_C;4_68554442_A_T;4_68553737_G_C;4_68552448_T_C;4_68550271_C_T;4_68550147_CT_C;4_68549215_C_T;4_68548847_G_T;4_68548474_A_G;4_68548452_G_T;4_68548222_A_T;4_68546533_C_T;4_68544837_C_T;4_68540692_A_G;4_68539785_C_G;4_68537817_C_T;4_68535664_TA_T;4_68530712_G_A;4_68528284_C_T;4_68526784_C_G;4_68525122_T_C;…	4_68490122_G_A;	4_68500171_A_G;4_68497597_C_A;	0.1485148514851485	4	-1	68478370	68566897	0.9476238973086172	4_68483534_G_A	3.263168430693069
ENSG00000033327	ENSG00000033327	Q9UQC2-2	11_78116959_G_A	rs7941639	1.1969616531719718e-09	7.397819886161783e-11	1.0	4.1094259694064863e-20	-0.6794436754694897	2.046773338400462e-17	-0.6462538003591531	0.007358820152148745	-0.571440145473634	0.8655785539606449	-0.020469178295097867	172	730193.0994225262	0.3122561338108554	2	0.38335998966346574	False	78116959,77917305,77919768,77920457,77920563,77922960,77923019,77923220,77923499,77923601,77923665,77924388,77924544,77924607,77924870,77930138,77930345,77930499,77930792,77930935,77931346,77932126,77933817,77936064,77936166,77937255,77937800,77940075,77940163,77940385,77941076,77941771,77943457,77943848,77944480,77944548,77944568,77945284,77945807,77945815,77945903,77948095,77948515,77952771,779…		11_78128397_CA_C;11_78128396_AC_A;11_78128067_CG_C;11_78032917_TA_T;11_78030917_CTT_C;11_78030149_GA_G;11_78030148_TG_T;11_78021392_CAA_C;11_78014269_CT_C;11_78004958_TTTTTTA_T;11_77997678_T_TTAAAA;11_77989624_AT_A;11_77987856_TTTTA_T;11_77985048_GT_G;11_77980084_CT_C;11_77975452_CT_C;11_77975451_TC_T;11_77974409_GTCAC_G;11_77969951_GTGCATG_G;11_77962788_GCTT_G;11_77960894_GT_G;11_77955621_CA_C;1…		11_78128797_C_T;11_77930138_T_C;	11_78128797_C_T;11_78128397_CA_C;11_78128396_AC_A;11_78128335_G_C;11_78128067_CG_C;11_78128047_C_G;11_78127914_A_G;11_78126754_G_C;11_78126162_C_A;11_78126011_G_A;11_78125246_T_C;11_78124797_G_A;11_78124575_C_G;11_78124534_T_C;11_78123831_T_C;11_78123293_C_T;11_78122779_A_G;11_78122208_G_T;11_78121978_T_C;11_78119822_G_A;11_78117875_A_G;11_78117534_T_C;11_78111613_T_C;11_78110385_C_A;11_78109810_…		11_77937800_G_A;11_77936166_A_G;11_77930345_T_C;	0.2202970297029703	11	-1	77926343	78129394			2.3590170693069306
ENSG00000033867	ENSG00000033867	Q9Y6M7-13	3_27529889_G_T	rs9871261	0.011959529479098892	0.003291215475285204	1.0	4.846427116960512e-07	-0.2654795406894858	2.302336633392319e-06	-0.2778876762624846	8.51212788439857e-05	-0.4425920037104945	3.0987873422581086e-08	-0.48874072662188	202	19215723.126690727	0.1646555224433566	23	0.12027049374294554	False	27529889,27268024,27270922,27272007,27272078,27273564,27274044,27275457,27277043,27277084,27278214,27279610,27281689,27281769,27281942,27283117,27283584,27284083,27284547,27285232,27285666,27285728,27286238,27287880,27288787,27290540,27290571,27291143,27291803,27292081,27292287,27292288,27294507,27294833,27296796,27296822,27297494,27297619,27297684,27298168,27298684,27299424,27299614,27299643,272…				3_27417179_T_C;3_27416730_T_C;				0.3118811881188119	3	-1	27414214	27525911	0.595665209444297	3_27324024_A_C	4.052127217085815
ENSG00000034152	ENSG00000034152	P46734	17_21183389_G_A	rs1009133	6.239485132810366e-05	9.516620774964188e-06	1.0	1.5164143920727195e-09	0.37979360434231707	4.38881016070382e-05	0.2925906436787029	1.2083937535757916	0.16725914847248874	0.02842481102072247	0.19459403800224706	202	4383682.627584237	0.16872626960270895	8	0.3511498230638597	False	21183389,21173498,21174551,21185631,21186360,21187683,21192905					17_21192905_C_T;	17_21192905_C_T;		0.35148514851485146	17	1	21187984	21218552			3.234583089108911
ENSG00000034533	ENSG00000034533	D6RG30	3_130754869_T_C	rs6796792	0.00034359301013574793	6.1213690907949e-05	1.0	6.654972505516161e-08	-0.4375826708934326	1.0618511406636039e-06	-0.5626080902613494	0.008074244200615536	-0.6796452896174578	0.6149676367910659	-0.055377063768251585	185	547901.6062233541	0.3653661174629924	5	0.4070750834237431	False	130754869,130584754,130588934,130592685,130593859,130598105,130606798,130606850,130611089,130612466,130612666,130617467,130618206,130621703,130624071,130625788,130632107,130633003,130634919,130635776,130638086,130646603,130651096,130651297,130656526,130660171,130663254,130664368,130665099,130665531,130665808,130665823,130676304,130678263,130680629,130681395,130685757,130687094,130691048,130692616…		3_130744944_GTTACTA_G;3_130739417_C_CGT;3_130734566_TA_T;		3_130744384_T_C;	3_130745981_A_G;3_130745865_C_G;3_130744944_GTTACTA_G;3_130744384_T_C;3_130743812_G_A;3_130742687_T_C;3_130742029_A_G;3_130741173_C_T;3_130739417_C_CGT;3_130738963_T_C;3_130738661_T_G;3_130738613_A_G;3_130736639_A_C;3_130734566_TA_T;3_130734341_A_G;3_130734061_C_T;	3_130744944_GTTACTA_G;3_130744384_T_C;3_130743812_G_A;3_130742687_T_C;3_130742029_A_G;3_130741173_C_T;3_130739417_C_CGT;3_130738963_T_C;3_130738661_T_G;3_130738613_A_G;3_130736639_A_C;3_130734566_TA_T;3_130734341_A_G;3_130734061_C_T;	3_130743812_G_A;3_130734061_C_T;	0.24504950495049505	3	-1	130732719	130746493			1.7605380363904664
ENSG00000034693	ENSG00000034693	P56589	6_143908406_C_T		0.08736383603283239	0.034841225490326574	1.0	6.764373033341976e-05	0.24750270594330884	0.015525083388510446	0.21282220682022	0.7165329916569447	0.16085172124686076	0.3790278590025047	-0.06614871743362546	202	4175042.5481166863	0.1862637903964427	10	0.16255584565502107	False	143908406,143909579								0.28465346534653463	6	1	143771944	143811147			3.130127198019802
ENSG00000035115	ENSG00000035115	Q96HL8	2_224919_A_G	rs2290911	8.635246081155092e-19	1.071445727030832e-20	1.0	6.354044799767327e-24	-0.9112482465398803	7.0826282419988535e-28	-0.9961478455147614	1.2823424800502225e-07	-1.0490988098394884	1.0434538861872213e-07	-0.6727672440599364	127	619521.8227414485	0.3921821186123723	1	0.2151310270123511	False	224919,211317,212548,214837,217334,217560,218386,220889,221560,221981,222336,226933,227066,227201,228088,229456,230912,231741,234668,237346,239597,239969,242132,242426,243929,249092,254215,256116,258210,262335,264019,264227,264621,267367,268191,268293,269679,271797,272203,274672,277003,280819,281178,282137,285421,285471,286756		2_237346_GGTGACACTACCA_G;2_234668_A_AAC;	2_224919_A_G;	2_264019_C_A;2_242132_G_A;2_239969_C_T;2_239597_C_G;2_230912_A_C;2_218386_G_A;	2_264621_A_C;2_264227_G_A;2_264019_C_A;2_262335_A_G;2_258210_T_C;2_256116_G_T;2_254215_G_A;2_249092_A_C;2_243929_G_A;2_242426_A_G;2_242132_G_A;2_239969_C_T;2_239597_C_G;2_237346_GGTGACACTACCA_G;2_234668_A_AAC;2_231741_C_T;2_230912_A_C;2_229456_A_G;2_228088_G_A;2_227201_C_T;2_227066_G_A;2_226933_A_G;2_222336_T_C;2_221981_C_T;2_221560_G_A;2_220889_G_A;2_224919_A_G;	2_258210_T_C;2_256116_G_T;2_254215_G_A;2_249092_A_C;2_243929_G_A;2_242426_A_G;2_242132_G_A;2_239969_C_T;2_239597_C_G;2_237346_GGTGACACTACCA_G;2_234668_A_AAC;2_231741_C_T;2_230912_A_C;2_229456_A_G;2_228088_G_A;2_227201_C_T;2_227066_G_A;2_226933_A_G;2_222336_T_C;2_221981_C_T;2_221560_G_A;2_220889_G_A;2_224919_A_G;	2_224919_A_G;	0.3688118811881188	2	-1	217730	266398	0.9897593971741079	2_217334_G_C	1.6407230523926908
ENSG00000035141	ENSG00000035141	E7EQY1	2_70445399_A_G	rs2441356	6.322270903662547e-06	7.681747861409018e-07	1.0	4.1286147358969566e-09	-0.4196670541567709	2.0635799902902244e-13	-0.5098533885396971	0.0003946999438333063	-0.31173154524730434	3.463227469780288e-05	-0.3205943518054541	202	19798973.16031703	0.14855744777486068	5	0.1075570499423402	False	70445399,70411345,70413538,70423835,70441775,70449776,70455907,70456586,70457119,70459227,70471899,70473453,70477319,70479260,70481524,70490362,70497824,70498923,70501479,70504926,70506331,70511784,70521278,70524142,70529242,70532499,70533707,70534978,70537658,70539853,70541419,70542023,70542060,70542940,70543386,70545888,70547597,70548241,70549122,70549165,70549961,70550490,70551937,70556337,705…				2_70524142_A_G;				0.3762376237623761	2	-1	70523107	70529222			4.883353059238524
ENSG00000035403	ENSG00000035403	P18206	10_75768180_A_G		0.02158405632816842	0.006490628667571658	1.0	3.023113521054657e-05	-0.2903021783812199	0.01015171817413675	-0.13158669378752805	0.020971960630536	-0.7260293777907643	0.006725378059235662	-0.22012015178653505	202	809067868.1168897	0.2436338060471676	82	0.18940444152600028	True	75768180,75713993,75718057,75719228,75720711,75720956,75724150,75725720,75728977,75730691,75731506,75731978,75733152,75737383,75737455,75737753,75738386,75741457,75743526,75744672,75745755,75746936,75747973,75748418,75748536,75748708,75749184,75752192,75752597,75752822,75752941,75755577,75756180,75756315,75757702,75758690,75759298,75759934,75761860,75762368,75765422,75768648		10_75759934_TA_T;			10_75768648_A_G;10_75765422_T_C;10_75762368_A_G;10_75761860_T_G;10_75759934_TA_T;10_75759298_C_T;10_75758690_C_T;10_75768180_A_G;			0.25742574257425743	10	1	75757872	75879918			7.164430549504951
ENSG00000035499	ENSG00000035499	Q8WUY9	5_59805730_C_T	rs114487734	1.0430919501067907e-05	1.3235534050283993e-06	1.0	2.412212684877773e-09	-0.6972349347935797	9.594167773228695e-24	-0.7740962603861336	0.00041049900787451857	-1.1277201991069168	5.431963234657531e-07	-0.9975417230500482	202	4182158.5352738574	0.14680017834951184	18	0.211172333080424	False	59805730								0.04702970297029703	5	-1	59892739	59996017	1.0	5_59805730_C_T	4.497365183168316
ENSG00000035687	ENSG00000035687	P30520	1_244516312_G_A	rs7538448	1.689764908253264e-06	1.8474077306666848e-07	1.0	4.5938288314877725e-11	0.4647152512242849	6.444943700403314e-10	0.3692933339595557	0.02261206859943825	0.44493518762513307	0.021883456492699776	0.1551742058153076	202	46675607.09815864	0.15507747555991525	22	0.14497002405497555	False	244516312,244513913,244515297,244515378,244516954,244517744,244517792,244517802,244517806,244518038,244518056,244518298,244518523,244518706,244518909,244519257,244519305,244519532,244519545,244519549,244519857,244520071,244520130,244520148,244520817,244520934,244521268,244521538,244522070,244523187,244523405,244523504,244523717,244524616,244524774,244524783,244525082,244525094,244525363,244525988…								0.4851485148514851	1	-1	244571796	244615436			5.097181613378413
ENSG00000035928	ENSG00000035928	P35251-2	4_39371096_C_T	rs62310771	0.006931909237480514	0.0017761851013513804	1.0	4.649739124200719e-06	0.2383314407875282	0.0015432708996146946	0.16796994859890788	0.2519324015603096	0.45343601612387	0.03501992728356934	0.13747317144800952	202	43712126.99019531	0.0900093565070794	44	0.09377977589024322	True	39371096,39368083,39375329,39377405,39378458,39383354,39385821,39387951,39391940								0.4752475247524752	4	-1	39289076	39367995			4.530322039603961
ENSG00000036257	ENSG00000036257	Q13618	2_225354713_G_A	rs13017924	0.01301730187928757	0.003618880014433803	1.0	2.463716362317536e-06	0.2496338897746435	0.00014615182992965372	0.19807124627252867	0.9822101318737378	0.20779399668419973	0.7759229393128799	-0.01992876959727764	202	57123654.87285154	0.1063740816733288	40	0.0675411808931631	True	225354713,225335595,225352461,225361150,225368321,225370554,225373666,225384428,225385542,225388104,225394218,225397170,225415134,225422239,225426527,225437518,225437923,225448976,225456444,225457173		2_225422239_AT_A;2_225372005_CATAATAAACAAGTAATGTCACAAAAACATGGCAACTGCAGTTTTGAGTTCATAAATACTTTATCCTACATAACTCTAATGCAGACCTAATGACACTACAAAACGTCTACAAAAAGGGTCACTAATTAAGAGGTAATTGGTAGTCCCTGTAATGAGGAAGAAATTTTAAAGCCAGTTTAAGTCTTATGGGTATTTCCAAAGGTTTAACTGATAATCATGAAAACAAATCAAATGAACTATACTAGGATTTACTTCATTACACCTCAGGTAAAGTTTTTATGAAATGTATAATATAAATACCACTTCTTCAATATTTTCCTGAGAGCAATCCCTAATGTTTCCCAGGTAGCATCCTAAGCCAATATCTGTA…		2_225335595_A_G;	2_225448976_G_T;2_225437923_C_T;2_225437518_A_G;2_225426527_C_T;2_225422239_AT_A;2_225415134_A_G;2_225397170_T_C;2_225394218_T_C;2_225385542_C_T;2_225384428_A_G;2_225373666_A_G;2_225372005_CATAATAAACAAGTAATGTCACAAAAACATGGCAACTGCAGTTTTGAGTTCATAAATACTTTATCCTACATAACTCTAATGCAGACCTAATGACACTACAAAACGTCTACAAAAAGGGTCACTAATTAAGAGGTAATTGGTAGTCCCTGTAATGAGGAAGAAATTTTAAAGCCAGTTTAAGTCTTATGGGTATTTCCAAAGGTTTAACTG…	2_225352461_C_G;2_225354713_G_A;		0.4356435643564357	2	-1	225334867	225450110			3.8220360022151185
ENSG00000037474	ENSG00000037474	Q08J23	5_6600793_T_C	rs3776446	0.0024022256764305162	0.0005286414926477079	1.0	4.8851711214105216e-08	0.2492662178399436	4.506701828620072e-38	0.3407266006072903	0.00032352164875421106	0.44535331559294544	2.585193653541804e-07	0.4989623717577278	202	68201102.80939516	0.0799173950172347	43	0.060961302299365576	False	6600793,6600492,6600864,6601055,6602544,6604533,6604931,6604970,6605271,6605532,6605970,6606019,6606303,6606323,6607125,6607916,6608150,6608534,6608957,6609139,6610237,6610249,6610263,6610391,6610786,6611757,6611983,6612243,6612464,6613146,6613418,6613827,6614653,6614655,6614764,6614963,6614969,6615060,6615092,6615728,6616532,6617011,6618186,6618323,6618703,6619733,6620459,6621031,6621210,6626561…		5_6615728_GC_G;5_6611753_TCACA_T;5_6607125_GAAC_G;5_6605970_AT_A;5_6604533_AC_A;5_6600492_G_GT;			5_6626673_C_G;5_6626561_T_C;5_6621210_A_G;5_6621031_A_G;5_6620459_A_G;5_6619733_C_T;5_6618703_T_C;5_6618323_G_C;5_6618186_T_C;5_6617011_C_A;5_6616532_T_C;5_6615728_GC_G;5_6615092_A_C;5_6615060_A_C;5_6614969_A_G;5_6614963_G_A;5_6614764_C_T;5_6614655_T_C;5_6614653_G_C;5_6613827_T_C;5_6613418_G_A;5_6613146_A_G;5_6612464_A_G;5_6612243_A_G;5_6611983_C_A;5_6611757_A_T;5_6611753_TCACA_T;5_6610786_G_T;5_…	5_6626673_C_G;5_6626561_T_C;5_6621210_A_G;5_6621031_A_G;5_6620459_A_G;5_6619733_C_T;5_6618703_T_C;5_6618323_G_C;5_6618186_T_C;5_6617011_C_A;5_6616532_T_C;5_6615728_GC_G;5_6615092_A_C;5_6615060_A_C;5_6614969_A_G;5_6614963_G_A;5_6614764_C_T;5_6614655_T_C;5_6614653_G_C;5_6613827_T_C;5_6613418_G_A;5_6613146_A_G;5_6612464_A_G;5_6612243_A_G;5_6611983_C_A;5_6611757_A_T;5_6611753_TCACA_T;5_6610786_G_T;5_…		0.3465346534653465	5	-1	6599352	6633404	1.0	5_6600793_T_C	4.600040638613862
ENSG00000037757	ENSG00000037757	Q9BV20	19_13869251_G_A	rs6511887	2.9421221327533216e-15	7.301063937067824e-17	1.0	1.5851808781808113e-23	-0.8556005489062023	2.8526888582300256e-21	-0.8278504827923648	1.2282945692961807e-10	-0.93202071379007	6.612921045366079e-12	-0.6616693475755757	202	8549194.655820457	0.2486049867766857	14	0.21186086954602104	False	13869251,13870153,13870227,13870393,13871411,13871554,13871830,13871858,13872240,13872531,13872597,13874258,13874898,13875186,13875210,13875234,13875258,13875626					19_13875626_T_C;			0.4801980198019802	19	1	13875346	13885096	0.9901244621621864	19_13870153_C_A	2.7637849851485154
ENSG00000038002	ENSG00000038002	P20933	4_178360550_C_T	rs13149149	1.8929193076236576e-14	5.362126564964593e-16	1.0	1.7446845890745428e-19	-0.978356697080261	6.993643035523311e-17	-0.904591439752342	0.9947293115414466	0.03729710803502417	0.5236229716097066	-0.0939486474356862	95	653513.3897106189	0.3291696433345033	2	0.5972556208514277	False	178360550,178356461,178361051,178361987,178362122,178363378					4_178363378_G_A;4_178362122_C_G;4_178361987_T_C;4_178361051_C_A;4_178356461_T_C;4_178360550_C_T;			0.349009900990099	4	-1	178351924	178363657			2.0367118712871286
ENSG00000038219	ENSG00000038219	Q8NFC6	4_13659459_C_T	rs12374327	0.028479268801622836	0.009034158779398092	1.0	1.6197163090491633e-05	0.2571964885023907	7.023514844408991e-07	0.9367089322017564	0.4998981409924236	0.677956523002358	0.7036076484834906	-0.057907735488094574	202	25177686.489515584	0.07842626188883775	57	0.1501709169800197	True	13659459,13624553,13643437		4_13624553_AG_A;			4_13624553_AG_A;	4_13624553_AG_A;		0.07425742574257425	4	-1	13570362	13629347			2.8465688514851477
ENSG00000039123	ENSG00000039123	D6REC7	5_54716886_T_A	rs10471415	0.013745801702594757	0.003856805183321975	1.0	7.694638412549135e-06	0.250597984685966	0.5071855281465006	0.11612686551782694	0.16415791452652626	0.35114741504097136	1.8703428961873527	0.007992246771406197	53	658162.1258044171	0.2174990731945078	1	0.35185480879800984	False	54716886,54544817,54545124,54546207,54547262,54557146,54569062,54569642,54576909,54588824,54601452,54614828,54616292,54616293,54618691,54620882,54625037,54627646,54641935,54644106,54646007,54646999,54648196,54655374,54664146,54667536,54677519,54679838,54681406,54684350,54685963,54702185,54710867,54726655,54728821,54731172,54733217,54739454,54743198,54750483,54750614,54754893		5_54655374_TTA_T;5_54648196_CT_C;5_54614828_AAC_A;5_54716885_AT_A;			5_54702185_G_A;5_54685963_G_A;5_54684350_T_A;5_54681406_G_A;5_54679838_A_G;5_54677519_A_G;5_54667536_T_C;5_54664146_G_A;5_54655374_TTA_T;5_54648196_CT_C;5_54646999_A_G;5_54644106_C_T;5_54641935_G_C;5_54627646_T_A;5_54620882_A_G;5_54618691_G_A;5_54616293_C_T;5_54616292_G_T;5_54614828_AAC_A;5_54716886_T_A;5_54716885_AT_A;	5_54702185_G_A;5_54685963_G_A;5_54684350_T_A;5_54681406_G_A;5_54679838_A_G;5_54677519_A_G;5_54667536_T_C;5_54664146_G_A;5_54655374_TTA_T;5_54648196_CT_C;5_54646999_A_G;5_54644106_C_T;5_54641935_G_C;5_54627646_T_A;5_54620882_A_G;5_54618691_G_A;5_54616293_C_T;5_54616292_G_T;5_54614828_AAC_A;5_54716886_T_A;5_54716885_AT_A;		0.2227722772277228	5	1	54603588	54721409			4.8957167821782175
ENSG00000039560	ENSG00000039560	Q9P0K7	5_34519673_T_C		0.05247558072745946	0.018697842413014937	1.0	2.5762882400093425e-05	-0.36176237451510995	0.0002774609691849295	-0.2619527829782203	0.07008280303733784	-0.3177393832442936	0.5546379459309203	-0.0491214704015277	202	31024318.25207287	0.099230927275877	45	0.12119538547755394	False	34519673,34517721,34518949,34519550,34519721,34519888,34519914,34520015,34520115,34520541,34520852,34521448,34521785,34522045,34522144,34522263,34522316,34522502,34522580,34522718,34523040,34523043,34523303,34523394,34523532,34523642,34524419,34524779,34525427,34525880,34525931,34526009,34526063,34526447,34526994,34527304,34527386,34527435,34527883,34528061,34528578,34528701,34528788,34528850,345…								0.2599009900990099	5	1	34656342	34832732			4.46047046039604
ENSG00000039650	ENSG00000039650	Q96T60	19_50380858_T_G	rs731826	0.007865859459928948	0.002041274777322074	1.0	3.2745767670004656e-07	0.3551107510224919	2.446952252640851e-07	0.4162085150041281	0.0009534250122089748	0.3901971346743927	0.002470279087163808	0.2332867460307204	202	11643056.777764088	0.1219523264016988	26	0.20860893160343888	True	50380858,50368361,50370066,50370106,50370846,50371399,50371647,50375035,50375242,50375447,50377757,50377835,50378143,50379053,50379193,50382865,50383636,50384882,50385031,50386340,50390412,50391301		19_50370846_CGTGG_C;		19_50370846_CGTGG_C;	19_50370846_CGTGG_C;19_50370106_T_G;19_50370066_C_T;19_50368361_T_A;	19_50370106_T_G;19_50370066_C_T;19_50368361_T_A;		0.4331683168316832	19	-1	50364461	50371166			3.9220602475247524
ENSG00000040199	ENSG00000040199	Q6ZVD8-2	16_71969945_T_C	rs10852506	0.004441487291761315	0.0010663104805574688	1.0	4.3281814053457954e-08	-0.2007247084665445	3.363780335821846e-05	-0.1952587612712036	0.029574232404300425	-0.27333579967007404	0.8514815550660824	0.023525666986721868	122	497262.7498997406	0.3627211756869035	2	0.3369806651871584	True	71969945,71937273								0.3886138613861386	16	-1	71671738	71758604			2.090602737623762
ENSG00000040531	ENSG00000040531	A8MXW3	17_3540755_G_A	rs322955	0.06445831254423781	0.023903070834618446	1.0	2.7501762765718324e-05	-0.21539990384268554	0.015509286384921227	-0.3739907945272056	0.0918145665092806	-0.2288511815044321	0.15943542245506456	-0.18901746777991613	159	281666.0661545953	0.2685864763610881	1	0.430841246369262	False	3540755,3544017,3545810,3545851,3546160,3548829,3549300,3549470,3551345,3552372,3556594,3557499,3564400		17_3564399_ATT_A;		17_3564400_T_A;17_3564399_ATT_A;	17_3557499_C_T;17_3556594_C_T;17_3552372_G_C;17_3551345_T_G;17_3549470_T_C;17_3549300_G_A;17_3548829_G_A;17_3546160_G_A;17_3545851_A_G;17_3545810_C_T;17_3544017_C_T;			0.3217821782178218	17	1	3539762	3564836			2.1846096732673272
ENSG00000041357	ENSG00000041357	H0YL69	15_78817929_C_T	rs8042849	2.63534985653084e-05	3.6683962418616143e-06	1.0	6.108021314209783e-10	-0.3209216120934361	4.45505473465152e-10	-0.5141349855834142	1.4581471951624023	-0.18675536207299293	0.18390807629277373	-0.12676397773516346	202	51318300.12778673	0.0936790102234542	12	0.10369719618363106	False	78817929,78801394,78802869,78804071,78806023,78814046,78816057,78821143,78826180,78828086,78849034,78849779,78850501,78851615,78857939,78857986,78862064,78862453,78865197,78866445,78867482,78868636,78869140,78873993,78877381,78878541,78882925,78886198,78886947,78894339,78896129,78898932,78899003,78900647,78900650,78900701,78900908,78901113,78906177,78911672,78922638,78923987								0.349009900990099	15	1	78832747	78841604			5.520374247524752
ENSG00000041802	ENSG00000041802	Q9H089	3_194369579_C_A	rs3821402	0.0009466903024313508	0.00018607748925846896	1.0	1.2101933871999536e-07	0.4620466631038934	6.645616513841911e-39	1.3795610491454688	0.4159154712639653	0.2804251817919867	0.003204342190098613	-0.3067536888187776	202	21183542.21517094	0.09676025271335524	24	0.14977431579487188	False	194369579,194369580,194377712,194401202,194401975,194402331,194402338,194402391,194402676,194406507					3_194377712_C_T;3_194369580_C_A;3_194369579_CC_AA;3_194369579_C_A;3_194369579_CC_AA;			0.18811881188118806	3	-1	194361517	194393206			3.920741876237624
ENSG00000042088	ENSG00000042088	Q9NUW8	14_90422664_T_C	rs942190	4.2399178998837967e-16	9.082347836576551e-18	1.0	2.4717976666160444e-26	-0.7452324670724499	2.7113013529558505e-16	-0.6260671193876458	2.26788880539032e-09	-0.6077010744785135	2.807539662993766e-14	-0.6698355506943721	202	10642862.98994582	0.11861388217152752	23	0.14761692568126866	True	90422664,90396574,90408339					14_90422664_T_C;	14_90422664_T_C;		0.4504950495049505	14	1	90421283	90511106	0.9611215594258032	14_90408339_T_C	3.648974153465346
ENSG00000042317	ENSG00000042317	Q9P0W8-2	14_89046464_G_A	rs1541890	5.52882172356369e-05	8.335622591536969e-06	1.0	1.765735550005024e-08	-0.4324840984427354	2.905004151389817e-05	-0.5021820879726661			0.9234814271181456	-0.015530025140226831	101	403908.9696595377	0.3896596005501049	2	0.5888753362364497	False	89046464,89036894,89042180,89048469,89050410,89052427,89053511,89053713,89053952,89058532,89064887,89073038,89074044,89074298,89079323,89090823,89100453,89105287,89123090,89124420,89134686,89136452,89140157,89164241,89167530,89175502,89179308,89187912,89188897,89193711,89200767,89202531,89204354,89209514,89210807,89224437,89233300,89243035,89243591,89246725,89252165								0.2475247524752475	14	1	88851268	88936694			1.430700997029703
ENSG00000042429	ENSG00000042429	Q9NVC6	11_93520726_T_C	rs613610	0.00028535600203039827	4.986966066152226e-05	1.0	4.617184884069086e-09	0.460585510551229	7.281466611516297e-07	0.3395741093468609	0.020379464338745292	0.6696842442913022	0.6167153174470067	0.04056584111933821	202	9920890.38462182	0.11470939965170805	20	0.38607152609196616	True	93520726,93478005,93484727,93486546,93495975,93507066,93511638,93512581,93513087,93513370,93513530,93514547,93526680,93527433,93535313,93537577,93540914,93544175,93544242		11_93526680_GT_G;11_93526301_TGAGACAGAGTTTCGCTCTTGTTGCCCAGGCTAGAGGGCAATGGCGCGATCTCAGCTCACCACAACCTCCATCTCCCGGGTTCAAGCAATTCTGCCTTAGCCTCCTCAGTAGCTGGGATTACAGGCATGTGCCACCACGCCCAGTTAATTTTGTATTTTTAGTAGAGATGGGGATTTCTCCATGTTGGTCTTGGCTGGTCTTGAACTCCTGACCTCAGGTGATCCATCCGCCTCGTCCTCCCAAAGTGCTGGGATTACAGGCATGAGCCACCATGCCTGCCCTGTGAGTACACCCATTTTTATCAATACTCCATTGGAATAAAACAATTTGGATTTTCTGTGGAATTCTTATTATGTTGATGTCATTAGA…	11_93535313_C_G;11_93526301_TGAGACAGAGTTTCGCTCTTGTTGCCCAGGCTAGAGGGCAATGGCGCGATCTCAGCTCACCACAACCTCCATCTCCCGGGTTCAAGCAATTCTGCCTTAGCCTCCTCAGTAGCTGGGATTACAGGCATGTGCCACCACGCCCAGTTAATTTTGTATTTTTAGTAGAGATGGGGATTTCTCCATGTTGGTCTTGGCTGGTCTTGAACTCCTGACCTCAGGTGATCCATCCGCCTCGTCCTCCCAAAGTGCTGGGATTACAGGCATGAGCCACCATGCCTGCCCTGTGAGTACACCCATTTTTATCAATACTCCATTGGAATAAAACAATTTGGATTTTCTGTGGAATTCTTATTATGTTGATGTCATTAGAC…	11_93526301_TGAGACAGAGTTTCGCTCTTGTTGCCCAGGCTAGAGGGCAATGGCGCGATCTCAGCTCACCACAACCTCCATCTCCCGGGTTCAAGCAATTCTGCCTTAGCCTCCTCAGTAGCTGGGATTACAGGCATGTGCCACCACGCCCAGTTAATTTTGTATTTTTAGTAGAGATGGGGATTTCTCCATGTTGGTCTTGGCTGGTCTTGAACTCCTGACCTCAGGTGATCCATCCGCCTCGTCCTCCCAAAGTGCTGGGATTACAGGCATGAGCCACCATGCCTGCCCTGTGAGTACACCCATTTTTATCAATACTCCATTGGAATAAAACAATTTGGATTTTCTGTGGAATTCTTATTATGTTGATGTCATTAGACTAAGAAGTGTTTTTTT…	11_93544242_C_T;11_93544175_C_T;11_93540914_T_G;11_93537577_C_T;11_93535313_C_G;11_93527433_C_G;11_93526680_GT_G;11_93526301_TGAGACAGAGTTTCGCTCTTGTTGCCCAGGCTAGAGGGCAATGGCGCGATCTCAGCTCACCACAACCTCCATCTCCCGGGTTCAAGCAATTCTGCCTTAGCCTCCTCAGTAGCTGGGATTACAGGCATGTGCCACCACGCCCAGTTAATTTTGTATTTTTAGTAGAGATGGGGATTTCTCCATGTTGGTCTTGGCTGGTCTTGAACTCCTGACCTCAGGTGATCCATCCGCCTCGTCCTCCCAAAGTGCTGGGATTACAGGCATGAGCCACCAT…	11_93544242_C_T;11_93544175_C_T;11_93540914_T_G;11_93537577_C_T;11_93535313_C_G;11_93527433_C_G;11_93526680_GT_G;11_93526301_TGAGACAGAGTTTCGCTCTTGTTGCCCAGGCTAGAGGGCAATGGCGCGATCTCAGCTCACCACAACCTCCATCTCCCGGGTTCAAGCAATTCTGCCTTAGCCTCCTCAGTAGCTGGGATTACAGGCATGTGCCACCACGCCCAGTTAATTTTGTATTTTTAGTAGAGATGGGGATTTCTCCATGTTGGTCTTGGCTGGTCTTGAACTCCTGACCTCAGGTGATCCATCCGCCTCGTCCTCCCAAAGTGCTGGGATTACAGGCATGAGCCACCAT…		0.2871287128712871	11	1	93517393	93547861			1.961472900990099
ENSG00000042445	ENSG00000042445	Q6NUM9	2_85531807_C_A	rs12714139	0.015783368791586174	0.004528273078330529	1.0	2.197770792703134e-06	0.36003057983947545	2.5971294603100435e-06	0.3971887626544909	0.11948110523946776	0.4271738472002581	0.3870404686939684	0.07818679702504377	202	2745083.9679705943	0.17933571147087224	14	0.1890130384561121	False	85531807,85532205								0.3118811881188119	2	-1	85569211	85581743			2.466348143195894
ENSG00000042493	ENSG00000042493	P40121	2_85641187_C_T	rs9677267	1.8530010174369225e-05	2.5073969052523498e-06	1.0	8.247908606188097e-13	0.6361196842510352	7.844518005758959e-11	0.7230167010169015	0.0006174209583703499	0.5172813307135735	0.000105564255877273	0.4071288167864351	202	21876950.962137647	0.2344437214356296	12	0.1515525121909342	False	85641187,85632942,85636192,85647589,85650369,85652690,85653209				2_85641187_C_T;	2_85636192_G_A;2_85632942_C_G;2_85641187_C_T;			0.13366336633663367	2	-1	85621871	85645555	0.01428247673438473	2_85640673_A_T	4.08928384900325
ENSG00000042753	ENSG00000042753	M0R0N4	19_47358704_G_T	rs381026	1.6431782835686354e-07	1.5118086513928917e-08	1.0	7.800657666334847e-13	-0.3776989659052298	5.177889129261873e-19	-0.8207058886591835	0.9369842747840184	-0.10784839253767098	0.902007050936832	-0.011339329468418535	202	4635146.145456018	0.18134345760821746	5	0.3085626613591761	False	47358704,47352660,47357875,47358995,47361480,47365184,47371616,47375962,47376101,47376137,47376386,47379025,47385704,47389313,47392744,47395283,47397172,47399389,47400952,47403547,47403854,47408167,47408815,47412224,47419984,47427210,47429798,47437956,47441846,47442908,47445076,47446562,47446691,47447158,47459490,47460366,47462364,47470536,47470862,47473742,47478784,47488891,47494945		19_47352660_AAC_A;			19_47352660_AAC_A;			0.4034653465346535	19	-1	47341393	47354249			5.687757747524752
ENSG00000043514	ENSG00000043514	Q9H3H1	1_40303627_C_T	rs12123609	5.977389252022814e-19	6.996826936700005e-21	1.0	1.7391683818923473e-25	-1.5982841644157997	3.473352554268584e-24	-1.4369909625339872	3.286429075637828e-15	-1.7895481812938066	0.0005320664579008318	-0.5863726953862571	202	4879744.1163569335	0.2394517568669109	12	0.3680276545964858	False	40303627,40312053,40313107,40317445,40321194,40329424,40330141,40339467,40345512,40346661		1_40312053_TG_T;			1_40346661_G_A;1_40345512_C_A;1_40339467_G_A;1_40330141_C_T;1_40321194_T_C;1_40317445_C_G;1_40313107_G_A;1_40312053_TG_T;	1_40346661_G_A;1_40345512_C_A;1_40339467_G_A;1_40330141_C_T;1_40321194_T_C;1_40317445_C_G;1_40313107_G_A;1_40312053_TG_T;		0.10396039603960396	1	-1	40306723	40349183			3.5539055601590004
ENSG00000044090	ENSG00000044090	Q14999	6_42956746_C_T		0.0009646661207775213	0.00019026833823131487	1.0	4.0767860833539883e-07	0.4905947888252809	0.00015839005076966162	0.4765745216529006	0.0023108335444717285	0.9665994155397994	0.30448725553771283	0.2446627453776399	202	3928388.8257758482	0.1945901826078308	19	0.21557828990098213	True	42956746,42958014								0.05198019801980198	6	-1	43005355	43021683			3.4145195544554454
ENSG00000044115	ENSG00000044115	P35221	5_138244268_C_T	rs62381203	1.0055235927312572e-10	5.1317837578231074e-12	1.0	3.4926332844518427e-16	0.6015888037797564	1.1644692751572891e-14	0.32388698649237696	0.6040812077711613	0.244829566585008	0.9137284084088894	-0.010383230605142568	202	129202853.81088392	0.09337597707444044	46	0.076423606765416	True	138244268,138078840,138087873,138088118,138095206,138096060,138097936,138098682,138098788,138099021,138100042,138101918,138103266,138106326,138110540,138110702,138113849,138115355,138121335,138123994,138126977,138131889,138132077,138132658,138135124,138135921,138136067,138137670,138138007,138139277,138145460,138146223,138146520,138150119,138150657,138150737,138151325,138151891,138152633,138154103…		5_138248747_CTT_C;5_138248447_TTA_T;5_138248446_ATT_A;5_138231192_TG_T;5_138226038_AT_A;5_138203436_CT_C;5_138183857_T_TG;5_138177320_CA_C;5_138163715_G_GT;5_138154758_A_AC;5_138132658_AT_A;5_138132077_CA_C;	5_138221989_G_C;		5_138267816_A_G;5_138264058_C_T;5_138262670_A_G;5_138261671_C_T;5_138259542_T_A;5_138259443_C_T;5_138258802_A_C;5_138258177_G_A;5_138257909_T_C;5_138256278_C_T;5_138256099_G_C;5_138256018_T_A;5_138255961_G_C;5_138251689_G_A;5_138250106_G_A;5_138249940_C_A;5_138248747_CTT_C;5_138248447_TTA_T;5_138248446_ATT_A;5_138246778_T_C;5_138246328_G_A;5_138243819_A_T;5_138243098_G_A;5_138241820_C_G;5_1382413…	5_138267816_A_G;5_138264058_C_T;5_138262670_A_G;5_138261671_C_T;5_138259542_T_A;5_138259443_C_T;5_138258802_A_C;5_138258177_G_A;5_138257909_T_C;5_138256278_C_T;5_138256099_G_C;5_138256018_T_A;5_138255961_G_C;5_138251689_G_A;5_138250106_G_A;5_138249940_C_A;5_138248747_CTT_C;5_138248447_TTA_T;5_138248446_ATT_A;5_138246778_T_C;5_138246328_G_A;5_138243819_A_T;5_138243098_G_A;5_138241820_C_G;5_1382413…		0.25742574257425743	5	1	137946656	138270723			6.072408514851486
ENSG00000044459	ENSG00000044459	Q9NXG0-2	9_17372209_G_C	rs12379102	3.240898533371994e-05	4.601673792555577e-06	1.0	3.386341050095615e-10	-0.40839158810415216	2.297967267970097e-08	-0.3718799682175296	0.04108322048495184	-0.2959677937089586	0.06640325187991791	-0.186704857853963	202	5697206.32772275	0.17010681922264226	17	0.2539845945605289	False	17372209,17246782,17246885,17247384,17249540,17249636,17251386,17252006,17252284,17253518,17254620,17254734,17255442,17261209,17261350,17261546,17263439,17267371,17268584,17269437,17271858,17272037,17273175,17274319,17278584,17279064,17280827,17282681,17283197,17290979,17291057,17293025,17293779,17294425,17295223,17295260,17295837,17300060,17300064,17300093,17301710,17302341,17302919,17309336,173…		9_17433614_GT_G;9_17366296_A_ATTG;9_17366293_GTTA_G;9_17362508_AT_A;9_17357596_AC_A;9_17355890_GTC_G;9_17355889_CGT_C;9_17353596_GT_G;9_17344148_GTTTAT_G;9_17334525_CGTGATA_C;9_17333747_CAT_C;9_17325168_ATTCTTT_A;9_17320490_TTTTG_T;9_17300059_AG_A;9_17254734_A_ATTG;9_17246885_GT_G;		9_17301710_C_A;9_17300093_G_A;9_17300064_C_T;9_17300060_G_A;9_17300059_AG_A;	9_17439798_A_G;9_17433614_GT_G;9_17428879_C_T;9_17418425_T_G;9_17414823_C_A;9_17413208_C_T;9_17399095_T_G;9_17398404_G_A;9_17394136_C_T;9_17392921_G_A;9_17391822_G_C;9_17391536_A_G;9_17391173_A_G;9_17390339_C_T;9_17390170_C_T;9_17385348_C_T;9_17384923_A_G;9_17384459_A_G;9_17383073_C_G;9_17380998_T_A;9_17379340_T_C;9_17379146_A_G;9_17376453_T_A;9_17374797_T_G;9_17373948_T_C;9_17373070_G_A;9_173729…			0.405940594059406	9	1	17134980	17503921			1.9703553267326732
ENSG00000046604	ENSG00000046604	Q14126	18_29075877_C_T	rs7231288	1.4170405567495755e-05	1.8511263740284752e-06	1.0	2.0324506031452368e-08	-0.3494570738398251	5.289131069440545e-07	-0.2416723178381199	0.0901755010768353	-0.4765930245006407	0.03973374892840608	-0.1537410008833151	202	32992177.886063784	0.1644128870393656	37	0.1700867757461614	False	29075877,29068536,29068662,29069580,29072968,29073191,29075273,29075793,29075862,29075875,29075905,29076049,29076052,29076164,29076223,29076238,29076427,29076502,29076691,29076717,29076829,29084421,29086048,29087973,29088148					18_29088148_G_A;18_29087973_A_G;18_29086048_A_G;18_29084421_T_A;			0.3564356435643564	18	1	29078006	29128971			5.9635271237623755
ENSG00000046889	ENSG00000046889	Q70Z35	8_69007752_A_T	rs535019359	0.0044516358965697965	0.0010692680393024957	1.0	2.48793516581468e-06	-0.3038691773739556	0.00011534359199953188	-0.22504090224284784	0.10967838448869048	-0.4069015963080832	0.14010440287809925	-0.15006147839182132	202	1369243.8441648872	0.2444513141602045	8	0.3146657817821128	False	69007752					8_69007752_A_T;			0.24504950495049505	8	1	68864353	69149265			2.615417831683168
ENSG00000047056	ENSG00000047056	Q9Y2I8	10_1135656_A_G		2.0426308133225103e-06	2.2762314576647897e-07	1.0	2.933703543798613e-09	-0.690918891738131	0.00020794816968262958	-0.4319034151296962	0.0784704315516761	-0.4385338416439864	0.2985969406679515	-0.1574253070292415	202	4205571.480454124	0.12199122101547324	14	0.10875331904359542	False	1135656,1116671,1117514,1125769,1128950,1135660,1135661		10_1135645_GCTCACCCGCAATTCAACCTTCCTGTG_G;10_1135642_CGTGCTCACCCGCAATTCAACCTTCCT_C;10_1135645_GCTCACCCGCAATTCAACCTTCCTGTG_G;10_1135642_CGTGCTCACCCGCAATTCAACCTTCCT_C;10_1135645_GCTCACCCGCAATTCAACCTTCCTGTG_G;10_1135642_CGTGCTCACCCGCAATTCAACCTTCCT_C;			10_1135661_A_G;10_1135645_GCTCACCCGCAATTCAACCTTCCTGTG_G;10_1135642_CGTGCTCACCCGCAATTCAACCTTCCT_C;10_1135660_A_G;10_1135645_GCTCACCCGCAATTCAACCTTCCTGTG_G;10_1135642_CGTGCTCACCCGCAATTCAACCTTCCT_C;10_1128950_G_A;10_1125769_A_C;10_1117514_T_C;10_1116671_A_G;10_1135656_A_G;10_1135645_GCTCACCCGCAATTCAACCTTCCTGTG_G;10_1135642_CGTGCTCACCCGCAATTCAACCTTCCT_C;			0.11633663366336636	10	1	1095478	1178237			2.217196727722772
ENSG00000047188	ENSG00000047188	Q9H6S0	5_112899250_G_A	rs6886199	2.710904925868686e-14	7.869652599969965e-16	1.0	2.1614580337698547e-18	0.8221121624923152	1.5535799672819376e-15	0.6241691494978282	1.1851574110161814e-05	0.641318384140515	6.924855390773577e-12	0.7307330968871479	202	20192323.53261208	0.10973374585629524	47	0.11966715941007798	False	112899250,112852568,112885560,112934886					5_112885560_C_T;5_112852568_G_A;5_112899250_G_A;	5_112885560_C_T;5_112852568_G_A;		0.2673267326732673	5	1	112849380	112930982	1.0	5_112885560_C_T	2.6349879306930695
ENSG00000047315	ENSG00000047315	C9J2Y9	4_57942537_G_T	rs11573061	0.025954841667153488	0.00808145602652795	1.0	2.0011696447362347e-06	-0.4374648914340685	0.1064920731646296	-0.2799436688057216	0.4080931229568381	-0.5395614878866106	0.043095843941633294	0.3479634106103775	202	59440844.18627371	0.07282562961959381	62	0.09743606880072893	False	57942537,57932174,57932199,57933494,57935521,57939027,57942357								0.09158415841584157	4	1	57843888	57897334			5.109170153465345
ENSG00000048471	ENSG00000048471	Q8TEQ0-2	16_12679752_C_A	rs13333483	0.0009378821508910641	0.0001838876978511685	1.0	3.718977254264288e-08	0.374637514934249	0.005226244418974378	0.24365957791917997	0.2279231829240622	0.44845448896279017	0.11654818399135712	-0.18259275666005947	184	813879.5791355	0.298703789047852	5	0.40928963013443015	False	12679752								0.4183168316831683	16	1	12070594	12668146			1.132124170792079
ENSG00000048544	ENSG00000048544	P82664	6_42158596_A_C		5.9640602552876655e-16	1.3054890176036445e-17	1.0	5.20022966724784e-27	0.7421291790450859	2.4434248400504556e-13	0.4907302319062623	2.435629187947605	0.13217546354455756	0.8041083209588124	-0.0227570153951544	202	8309455.3949551135	0.16836503732338	8	0.1779512803894003	True	42158596,42159132,42159228,42159557,42159568,42159652,42159705,42159859,42160041,42160070,42160217,42160445,42160593,42161127,42161786,42162388,42163750,42163839,42163924,42164401,42164560,42164874,42165700,42166050,42166552,42167161,42167970,42168542,42168601,42168677,42169045,42169203,42169224,42170356,42170761,42170785,42170880,42171359,42171545,42171560,42173254,42174611,42174963,42174984,421…		6_42182375_GA_G;6_42182322_CA_C;6_42182221_GA_G;		6_42175927_G_A;6_42175268_G_A;6_42175221_A_G;6_42175063_A_G;6_42174984_C_T;6_42174976_TGAGACGGC_TTGAGACGGT;6_42174611_G_T;	6_42184400_C_T;6_42183686_G_A;6_42183000_C_T;6_42182762_C_A;6_42182512_G_A;6_42182375_GA_G;6_42182322_CA_C;6_42182322_C_T;6_42182221_GA_G;6_42181960_A_C;6_42181773_G_A;6_42181256_T_A;6_42180404_G_A;6_42180105_T_A;6_42180066_T_C;6_42180000_T_C;6_42179387_G_C;6_42179091_G_A;6_42178953_G_A;6_42178578_C_G;6_42177380_C_G;6_42177028_A_G;6_42176120_G_T;			0.37376237623762376	6	-1	42174539	42185603			4.706368034653465
ENSG00000048828	ENSG00000048828	Q9NZB2-6	9_96160820_A_C	rs2841682	0.02619934056471654	0.008175985244707279	1.0	9.398263115623463e-06	-0.27140487307810146	0.007476201651604727	-0.17708917664520835	0.2362368826179033	-0.3759532737371292	0.281014435823975	-0.09617379427114714	202	20236479.862136547	0.13109362920097115	33	0.1264065976442675	False	96160820,96168343								0.2475247524752475	9	1	96214004	96328397			3.916047099009901
ENSG00000049167	ENSG00000049167	Q13216	5_60095726_T_C	rs7709444	1.9390160976724568e-10	1.0735744050088636e-11	1.0	7.61087242891198e-19	-0.7291019185738888	3.878811761348064e-15	-0.5684460464056491	0.08089532703310234	-0.4329657615349469	0.0034775755860612717	-0.3027882623510156	141	422988.4560903451	0.2109683710968872	2	0.3384388497640161	True	60095726,60083275,60083903,60084491,60085763,60088148,60088250,60088255,60088794,60089137,60090951,60091046,60091192,60091330,60091556,60091673,60091818,60092687,60093387,60093612,60095272,60095668,60095883,60096497,60098267,60103492,60117202,60117723,60119737								0.4851485148514851	5	-1	60169658	60240900			2.3892948415841584
ENSG00000049239	ENSG00000049239	R4GMU1	1_9292606_G_A	rs7555568	6.767436519280521e-08	5.830309350568258e-09	1.0	1.068255793116885e-14	-0.3479391043346149	4.499810652507069e-14	-0.3157831643173412	0.0007668769382407402	-0.4444064127110369	0.03748652273308477	-0.18804026402914809	202	1896187.5697536087	0.35797002615527906	11	0.6098313361197835	False	9292606,9290707,9291666,9294903,9295444,9295794,9300608,9300677,9303926,9306849,9307896,9308014,9308037,9308966,9309746,9310040,9310655,9315338		1_9307896_T_TTGGG;1_9303926_C_CGTG;		1_9294903_C_G;	1_9310655_T_C;1_9310040_G_A;1_9309746_G_T;1_9308966_C_G;1_9308037_C_T;1_9308014_G_T;1_9307896_T_TTGGG;1_9306849_T_C;1_9303926_C_CGTG;1_9300677_T_C;1_9300608_T_C;1_9295794_G_C;1_9295444_T_C;			0.4702970297029703	1	1	9294834	9331396			2.4499151334730174
ENSG00000049245	ENSG00000049245	Q15836	1_7841330_G_A	rs1048785	2.8394721615791345e-05	3.985165775176615e-06	1.0	3.0387106426109537e-10	0.5935254776552576	1.2139851687390404e-06	0.4165578004303621	0.008656144901081117	0.4830382854443819	0.6289138976281988	-0.06284285715261229	202	3579766.2007476143	0.2380357630937593	6	0.3888841778869145	True	7841330				1_7841330_G_A;				0.14603960396039606	1	1	7831329	7841492			4.47760315864406
ENSG00000049323	ENSG00000049323	C9JDW2	2_33157471_G_A	rs6759573	1.631997453097544e-05	2.1682279167338315e-06	1.0	1.041000193901376e-10	0.4054645669685752	1.4521816247057016e-06	0.3844084612878284	0.5466268546829344	0.06058056729239436	0.05901816006604513	0.13022307663322655	124	3066220.674654342	0.2471321783085047	1	0.2938811000300373	False	33157471,33157792,33158042,33158660,33158828,33158912								0.4034653465346535	2	1	33172039	33624576			3.7602607458855037
ENSG00000049449	ENSG00000049449	Q15293	11_32111389_G_T	rs3781857	0.0003009573009918632	5.287801811878574e-05	1.0	6.3466101640347e-11	-0.8921366679685918	5.845093964453441e-11	-0.9266639119832154	0.0049916412100881255	-0.4307684755203407	0.002908247413188295	-0.38394906635202064	202	65716219.30379522	0.13111211851858798	17	0.20710913987100726	False	32111389,32083035,32096603,32103247,32104756,32111460,32138748,32154165,32154371,32162135								0.14356435643564355	11	1	31833939	32127301	0.3563774560521371	11_32112568_A_C	4.878272900990099
ENSG00000049860	ENSG00000049860	P07686	5_73980197_T_C	rs820871	0.00014505447125309737	2.388992637868524e-05	1.0	1.2842614453796813e-07	-0.29918696064912226	7.060682198148969e-05	-0.2464343719447088	0.00120013935582996	-0.4772631023222982	0.0015406340987878535	-0.2565329785119088	202	37385129.95669907	0.14691773485558998	15	0.06959464237132278	True	73980197,73968469,73973359,73981662,73982325,73982349,73982692,73982789,73982965,73983049,73984074,73984161,73984188,73984246,73984264					5_73984264_G_A;5_73984246_A_G;5_73984188_G_A;5_73983049_A_G;5_73982965_T_C;5_73982789_G_A;5_73982692_G_C;5_73982349_C_A;5_73982325_C_A;5_73981662_G_A;5_73973359_A_C;5_73968469_C_T;5_73980197_T_C;			0.2995049504950495	5	1	73935848	74018472			4.091236648514852
ENSG00000050327	ENSG00000050327	Q12774	7_144075013_C_T	rs713253	0.08989098305205039	0.03609769734684533	1.0	0.0001083097671967016	-0.515829727368585	1.1888188310140935e-05	-0.6106804235874966	0.3503418437117388	-0.7128227362157281	0.26668645845340233	-0.1259365257703312	202	2661675.54130352	0.1877337653877772	17	0.29307171410912075	False	144075013,144080795,144083523,144085487,144088588,144094130,144094613,144096068,144098922,144100595					7_144075013_C_T;			0.15594059405940594	7	1	144052381	144077725			2.3326361039603962
ENSG00000050393	ENSG00000050393	Q96AQ8	6_13862276_A_G		0.06484200099494204	0.024090894434969687	1.0	4.3907443170252054e-05	0.28938356295497863	0.021377270640296483	0.1480258660560008	2.4292492397058827	0.04540289467119263	0.4916985223343859	0.07614780093907618	202	1119919.3614396788	0.18971847387701968	5	0.5619620939310846	False	13862276								0.3935643564356436	6	-1	13786789	13814800			3.3005795396039606
ENSG00000050426	ENSG00000050426	Q6P1Q0	12_51508050_C_T	rs67478184	0.0016840747580271196	0.00035305839770883435	1.0	1.025402681149991e-06	0.5442892418680964	0.0014521843884740225	0.5128353618818314	0.3554095756880384	0.383304181799101	0.8785323218657727	0.020907249125913463	180	233828.46819306948	0.29542479865490195	3	0.2235763558445001	False	51508050,51326702,51329938,51333424,51335777,51336006,51336491,51336871,51337333,51337471,51337669,51342467,51343976,51344756,51344759,51345265,51345370,51345373,51345465,51347561,51348450,51349641,51349847,51351189,51351846,51352452,51353494,51353556,51353851,51354355,51354469,51354506,51354625,51354803,51355297,51355601,51355701,51356210,51356311,51356459,51356502,51357104,51357346,51357542,513…		12_51442574_TC_T;			12_51452662_C_T;12_51445679_G_A;12_51445432_G_T;12_51443387_G_A;12_51442574_TC_T;	12_51452662_C_T;12_51445679_G_A;12_51445432_G_T;12_51443387_G_A;12_51442574_TC_T;		0.12623762376237624	12	1	51441745	51454207			3.1800963712871293
ENSG00000050555	ENSG00000050555	Q9Y6N6	9_133926152_C_G	rs10901331	3.354557590366756e-07	3.27484610835289e-08	1.0	1.3941131636815278e-10	0.4607346738901834	1.0993466105712416e-09	0.4541423687532425	0.12222232429107435	-0.5132527294702971	0.3850345351618336	-0.11929893292031556	116	711650.418131041	0.3314629609562562	1	0.5398817862475688	False	133926152,133915854,133916145,133916387,133922072,133922634,133926616,133927185,133927878,133928345,133928790	9_133927878_A_G;	9_133927185_CACTGGGAAAGGAGGAGGGAGGGT_C;9_133922634_CTCCGCCTCCCAGGTTCAAGTGATTT_C;	9_133927878_A_G;		9_133928790_G_C;9_133927185_CACTGGGAAAGGAGGAGGGAGGGT_C;9_133926616_C_A;9_133922634_CTCCGCCTCCCAGGTTCAAGTGATTT_C;9_133922072_C_T;9_133916387_G_T;9_133916145_C_A;9_133915854_G_C;9_133926152_C_G;		9_133928345_C_T;	0.4653465346534654	9	1	133884469	133969860			2.212139504950495
ENSG00000050748	ENSG00000050748	P45984-2	5_179741374_C_A	rs55901738	1.1122628370604728e-07	9.933940590859658e-09	1.0	1.7447071447549195e-12	0.4779668063363216	2.435366297803027e-06	0.3120790638966943	1.3100705069561065	0.10811451035424292	0.6567472521498625	-0.028864276453054668	202	4966410.94734017	0.1506652015714607	11	0.2147142499500768	False	179741374,179720924,179721688,179740462,179740640								0.400990099009901	5	-1	179660143	179719099			3.0525428960396037
ENSG00000050767	ENSG00000050767	Q86Y22	5_177888966_C_T	rs1846371	0.01620904109261815	0.004667475253171093	1.0	3.5116836781558855e-06	0.3342750771250113	2.689474744229884e-05	0.31018785230245416	0.22113161613654736	0.061629479597328014	0.7429838732864218	-0.050848247966252084	77	679103.7661646281	0.4840485793376968	2	0.3223632558051485	False	177888966,177882629,177884471,177886112,177886579,177886624,177886913,177888014,177888991,177890055					5_177890055_G_A;5_177888991_A_T;5_177888014_C_A;5_177886913_C_T;5_177886624_G_A;5_177886579_G_A;5_177886112_C_T;5_177884471_C_T;5_177882629_G_A;5_177888966_C_T;			0.4925742574257426	5	-1	177664619	178017556			2.178134608910891
ENSG00000050820	ENSG00000050820	P56945	16_75276775_G_A	rs1035539	0.009297499360622788	0.0024655824930360014	1.0	1.2621970456529925e-05	-0.1748441112245488	4.496086401057811e-05	-0.2757238211944993	0.6818952515518766	-0.3566623883820783	0.8613296324880675	-0.00913283285963784	202	9111216.224127527	0.18216685368474467	29	0.16013472441777324	True	75276775,75251097,75274980	16_75276775_G_A;				16_75274980_A_G;16_75276775_G_A;			0.3415841584158416	16	-1	75262928	75301951			3.6352629009900994
ENSG00000051128	ENSG00000051128	Q9NSC5-2	19_19050957_A_G	rs1122821	3.6902401848002456e-09	2.4967327950538943e-10	1.0	2.5399447548568736e-14	-0.7033107786618019	4.790860548710583e-13	-0.6918656141440217	0.00029958452927395	-0.5164955374417683	7.544254290498216e-05	-0.3923359528852641	202	4287269.648581985	0.2343353699904299	10	0.5613194376037037	False	19050957				19_19050957_A_G;	19_19050957_A_G;			0.3712871287128713	19	-1	19040010	19052070	1.0	19_19050957_A_G	2.7033209455445544
ENSG00000051523	ENSG00000051523	P13498	16_88707268_T_A	rs4782390	0.0004184647592001874	7.572825912717893e-05	1.0	2.5712392355679972e-08	0.34148008430053217	1.390374654345784e-07	0.4082606888536762	6.769468130390945e-06	0.0867738437236345	0.00024513234886525023	-0.4177678994289961	136	4104737.799984709	0.5682345602895663	2	0.6749512422985269	False	88707268,88709084,88709343,88709712,88709828	16_88709828_A_G;16_88709825_GCCA_G;			16_88709712_A_G;				0.3910891089108911	16	-1	88709691	88717560			4.5897683762376245
ENSG00000051620	ENSG00000051620	Q9Y5Z4	6_138645228_G_A		0.035255170333508015	0.011625168539095407	1.0	6.261099126746479e-06	-0.6991342439525368	0.000273827976057266	-0.6885294581543809	0.0013342063315683553	-0.6660290386688272	5.347819077617256e-05	-0.5668642252681257	202	11876027.608184835	0.18474391118566647	10	0.1393952118661614	False	138645228,138647764,138648093,138648286,138648461,138648516,138648583,138649706,138649825,138649846,138650806,138651479,138651600,138651790,138651862,138652028,138652389,138652439,138654235,138654770,138655028,138656343,138657683,138663385,138664594,138665889,138668756,138669247,138669582,138669933,138672368,138674499,138675031,138675197,138675494,138677059,138678324,138679252,138679839,138681114…		6_138729870_G_GCTC;			6_138729870_G_GCTC;6_138729664_T_C;6_138729632_G_C;			0.04950495049504952	6	1	138724668	138743334			2.4606301930693073
ENSG00000051825	ENSG00000051825	A0A0A0MTP3	12_123632930_G_A	rs1727302	5.027813348600259e-12	2.106938053141628e-13	1.0	2.163773125449437e-19	0.6084444162215319	1.0321568152122023e-12	0.6744076050239939	0.3373082078239965	0.3404937369537774	0.7495965238765002	-0.04089462009567457	185	1331067.2643979914	0.7474610471326151	5	0.5886009732407224	False	123632930,123590165,123614813,123616514,123618544,123618603,123619838,123619856,123620270,123621210,123622209,123622731,123623174,123627016,123632276,123633382,123633424,123634043,123634122,123636841,123637509,123637752,123638070,123638580,123638930,123640664,123641200,123642220,123642538,123642955,123643420,123643689,123644056,123645803,123647725,123648032,123648881,123650335,123650714,123651018…		12_123721172_GTTTGT_G;12_123717689_AGC_A;12_123703440_TTTTG_T;12_123699200_GTTT_G;12_123697006_GCGGGCAGATCACCTGAGG_G;12_123685778_C_CGTTTT;12_123684782_GA_G;12_123678364_GAC_G;12_123672959_A_AA;12_123662407_A_AC;12_123653256_CCCT_C;		12_123717689_A_G;12_123717689_AGC_A;12_123645803_G_A;12_123641200_C_T;12_123640664_C_A;12_123638930_G_A;	12_123728230_G_A;12_123725954_G_A;12_123725827_T_C;12_123723735_G_C;12_123721614_A_C;12_123721177_T_G;12_123721172_GTTTGT_G;12_123720775_G_T;12_123719880_C_A;12_123719585_G_C;12_123719444_G_A;12_123718879_C_G;12_123718301_C_T;12_123717689_A_G;12_123717689_AGC_A;12_123717362_A_G;12_123716513_C_T;12_123716376_C_T;12_123715266_T_C;12_123715113_C_T;12_123714236_A_G;12_123712712_G_T;12_123710364_C_T;1…	12_123717362_A_G;12_123716513_C_T;12_123716376_C_T;12_123715266_T_C;12_123715113_C_T;12_123714236_A_G;12_123712712_G_T;12_123710364_C_T;12_123709927_G_A;12_123709409_C_T;12_123708490_T_A;12_123708063_A_G;12_123705330_A_C;12_123705242_A_G;12_123704890_G_A;12_123704844_T_C;12_123704598_G_A;12_123703581_A_C;12_123703501_C_T;12_123703440_T_G;12_123703440_TTTTG_T;12_123703226_T_A;12_123703103_T_C;12_1…	12_123645803_G_A;	0.2376237623762376	12	-1	123636867	123728561			2.729149193069307
ENSG00000052344	ENSG00000052344	Q16651	16_31110501_G_T	rs17880887	0.0963777381327159	0.039304698543179466	1.0	0.0006809336165168468	0.1980309505853096	0.006339145541565536	0.2403233542779466	0.4363723148604831	0.2534375986090525	0.7832863119615481	0.02052035335894975	202	2536658.1886136904	0.2254168872705184	6	0.18343345203289896	False	31110501,31119462,31119554,31126535,31132510,31133110,31136085,31138445,31142271,31143993,31147262					16_31143993_C_T;			0.33910891089108913	16	-1	31142756	31147083			5.3398381188118815
ENSG00000053371	ENSG00000053371	O43488	1_19638090_G_C	rs4911983	3.309410623371944e-05	4.706700114007856e-06	1.0	3.799500305150162e-11	0.4279326176826039	5.052472091457694e-10	0.5255948045219389	0.03827005501096558	0.3320526717954162	0.0007892806947782571	0.2976294860545168	202	6387635.214179818	0.16982307817055095	7	0.15792932763946416	False	19638090					1_19638090_G_C;			0.19306930693069307	1	-1	19630459	19638640			4.221196203027074
ENSG00000053372	ENSG00000053372	Q9UKD2	1_19583725_T_C	rs1738017	3.327200614450315e-07	3.236455238918661e-08	1.0	1.74404158697466e-10	-0.3165095390921193	4.528956147925125e-08	-0.30459563555120744	0.1723062150624085	-0.3323800028480484	0.04954781095739762	-0.2279591308321089	202	25178382.32702057	0.1106752316003936	16	0.2442746144302204	False	19583725,19576035,19579312,19579969,19580826,19580857,19581226,19581467,19581934,19583684,19584004,19585903,19586015,19586294		1_19579312_GT_G;		1_19586015_G_T;1_19585903_G_A;	1_19583684_C_T;1_19581934_G_T;1_19581467_C_T;1_19581226_G_A;1_19580857_G_C;1_19580826_A_G;1_19579969_A_G;1_19579312_GT_G;1_19583725_T_C;		1_19584004_G_A;	0.2277227722772277	1	1	19578033	19586622			4.546313916453746
ENSG00000053501	ENSG00000053501	Q9NZ43	19_17326567_A_T	rs388484	1.1118578355052937e-09	6.806761652455445e-11	1.0	3.1926334213019357e-16	0.4682716641284886	4.213620770121168e-06	0.39017694756171983	1.4926372851632186	-0.04877954712867427	0.6092342334479166	-0.040871977318991726	186	507507.06565808435	0.2170528724619107	3	0.26307976977367103	False	17326567				19_17326567_A_T;	19_17326567_A_T;	19_17326567_A_T;		0.4034653465346535	19	1	17326155	17330638			2.138906797029703
ENSG00000054282	ENSG00000054282	Q86SQ7	1_243240807_A_G	rs9662837	0.0004888843771474378	8.967362975418883e-05	1.0	5.866753302096965e-08	0.3734862348303652	5.039067765163369e-05	0.39546568369749024	1.914881034705028	0.1888847634913869	0.10878102040426753	0.1598242328845637	193	588158.6900861601	0.28645368953540423	4	0.4781646735882414	False	243240807								0.452970297029703	1	1	243419320	243663394			1.582507364233118
ENSG00000054523	ENSG00000054523	O60333-3	1_10462875_T_C	rs11121563	6.487088705581068e-05	9.977800022396726e-06	1.0	3.273892004951142e-09	0.17336443317393072	0.00024410984156300063	0.2803364717408772	0.3220749650984621	0.1511193533284061	1.179845062321042	-0.015986154321877333	202	3384600.6349901375	0.17774011912733212	11	0.15993742565616526	False	10462875,10274646,10275592,10282186,10283961,10285447,10285709,10286358,10287312,10288463,10290640,10304014,10308597,10314962,10317879,10319049,10333959,10334924,10337133,10340499,10342352,10348712,10348765,10380875,10380877,10393626,10395683,10402842,10407169,10410542,10413123,10414470,10418826,10426417,10438687,10441664,10444202,10447792,10448260,10452040,10454773,10458480,10461177,10463572,104…		1_10395682_TG_T;1_10380877_T_TCCTCAC;1_10342352_CC_C;1_10304014_G_GTTAA;		1_10438687_C_T;	1_10426417_G_A;1_10418826_G_A;1_10414470_T_C;1_10413123_G_A;1_10410542_T_G;1_10407169_T_G;1_10402842_A_G;1_10395682_TG_T;1_10393626_G_T;1_10380877_T_TCCTCAC;1_10348765_C_T;1_10348712_A_C;1_10342352_C_T;1_10342352_CC_C;1_10340499_A_G;1_10337133_A_G;1_10334924_C_T;1_10333959_G_T;1_10319049_G_A;1_10317879_A_G;1_10314962_G_T;1_10308597_T_C;1_10304014_G_GTTAA;1_10290640_T_C;1_10288463_C_T;1_10287312_T…			0.4950495049504951	1	1	10270863	10441661			3.9394291652265356
ENSG00000054793	ENSG00000054793	O75110	20_50388229_A_G	rs6091367	0.0014723984099599757	0.00030471735793155064	1.0	1.0838340015871536e-08	0.2425865648765743	2.023227517537717e-05	0.2422349364983293	1.7485453391784156	0.03396931538410447	0.3544641594935469	0.11360993266164544	131	820600.2433766971	0.31728613039272113	2	0.6736902322942404	False	50388229,50383679,50384821,50390090					20_50384821_A_G;20_50383679_C_T;			0.4603960396039604	20	-1	50213053	50385173			2.029229113861386
ENSG00000054983	ENSG00000054983	P54803	14_88473386_T_G	rs75703795	3.909403133132133e-06	4.5441148439660654e-07	1.0	9.599217913136203e-10	-0.5774801147151024	2.4676550700145647e-06	-0.4301462954231106	0.07692394944715455	-0.4495059362844565	0.010561616324069358	-0.3602164172181461	202	3940254.359275557	0.25916872297774035	11	0.2583374277056931	False	88473386,88391492,88393995,88394665,88398224,88399950,88402596,88403734,88405272,88408278,88409965,88410395,88417443,88417651,88417897,88418613,88418729,88418768,88419242,88420282,88420511,88421100,88421350,88421482,88421564,88421619,88421677,88421908,88422855,88422929,88423662,88424458,88424606,88424652,88425686,88425835,88426381,88426412,88427352,88428283,88429344,88429427,88429690,88429980,884…	14_88459448_C_G;14_88442712_C_T;	14_88455067_TA_T;14_88451566_TATTAA_T;14_88451565_ATAT_A;14_88449662_TA_T;14_88446303_A_AC;14_88445472_A_AT;14_88445056_AGG_A;14_88441731_G_GATA;14_88440560_TAAAAG_T;14_88439785_CAAG_C;14_88439096_CATAA_C;14_88434207_TA_T;14_88433885_TA_T;14_88432846_TA_T;14_88432787_TA_T;14_88427352_AC_A;14_88424652_GAAGT_G;14_88424458_CAAGGCTATAGTAACCAA_C;14_88422929_C_CTA;14_88422855_ATG_A;14_88403734_GACT_G;1…		14_88459150_C_T;14_88458745_C_T;14_88446978_G_C;14_88442712_C_T;14_88399950_C_T;	14_88459656_A_G;14_88459467_C_G;14_88459448_C_G;14_88459280_C_A;14_88459150_C_T;14_88458745_C_T;14_88458573_A_G;14_88457929_G_C;14_88457698_T_C;14_88457174_A_T;14_88456985_T_A;14_88456972_G_A;14_88456899_A_G;14_88456877_A_G;14_88456428_T_G;14_88456281_C_T;14_88456200_C_T;14_88456144_A_G;14_88455963_C_T;14_88455875_G_A;14_88455711_T_C;14_88455605_C_A;14_88455488_C_T;14_88455067_TA_T;14_88454937_C_…	14_88459467_C_G;14_88459448_C_G;14_88459280_C_A;14_88459150_C_T;14_88458745_C_T;14_88458573_A_G;14_88457929_G_C;14_88457698_T_C;14_88457174_A_T;14_88456985_T_A;14_88456972_G_A;14_88456899_A_G;14_88456877_A_G;14_88456428_T_G;14_88456281_C_T;14_88456200_C_T;14_88456144_A_G;14_88455963_C_T;14_88455875_G_A;14_88455711_T_C;14_88455605_C_A;14_88455488_C_T;14_88455067_TA_T;14_88454937_C_T;14_88454469_A_…	14_88459467_C_G;	0.11633663366336636	14	-1	88304164	88460009	0.08907437165038898	14_88410227_G_C	2.3426215148514853
ENSG00000055147	ENSG00000055147	Q9NRY5	5_153305438_T_C	rs1461241	0.0008007264791492182	0.00015418413416837931	1.0	1.8818251964001213e-07	-0.4080429344923076	6.947184123899716e-06	-0.3859787673498563	0.07286719577669626	-0.6790055179069223	0.8818683253464379	-0.013488753882221484	202	7810888.804364357	0.32343723656224405	19	0.3043684682451426	False	153305438,153303901,153306266,153306311,153306598,153306780,153309337,153309504,153309888,153310081,153310122,153310324,153310472,153310598,153312211,153313826,153315450,153316866,153317033,153318776,153320104,153320752,153321202,153321265,153322777,153323431,153324358,153325893,153326223,153326505,153327133,153329433,153332555,153333575,153334883,153335580,153336744,153337438,153340031,153341832…								0.3712871287128713	5	-1	153369688	153418496			1.7509666336633662
ENSG00000055332	ENSG00000055332	P19525	2_37362411_C_A	rs4648205	0.07192980196897644	0.027490437016119404	1.0	0.00016080925434908494	-0.3286549465511445	0.0029231246507200183	-0.2607875407743808	1.2067257653549317	-0.2734937774310964	0.6969129055452457	0.04571294526524032	202	33028585.98980281	0.2591644026439018	20	0.14048640077290356	False	37362411,37363107,37365798,37369467,37370959,37373090,37373250					2_37373250_T_C;2_37373090_T_C;2_37370959_T_C;2_37369467_C_G;2_37365798_A_G;2_37363107_C_A;2_37362411_C_A;			0.08663366336633663	2	-1	37326353	37384208			3.7347842457435556
ENSG00000055483	ENSG00000055483	Q9P275	17_76827880_A_G	rs11649885	1.0377934145535538e-05	1.3149823600281876e-06	1.0	7.741795770154655e-12	0.3893714741753401	1.2168984918289199e-20	0.885411817443587	0.5019829965325974	0.2939564541791193	0.9483214357187992	-0.005513469418485073	202	10473178.021664344	0.10748851931228884	27	0.1654833260210585	False	76827880,76661528,76661542,76675803,76677481,76691564,76692298,76693551,76696986,76698950,76710245,76722462,76726515,76728668,76729757,76730039,76739141,76739850,76757296,76762039,76772288,76773638,76777694,76789886,76790279,76791217,76792179,76796463,76798155,76798362,76798548,76799795,76808726,76808773,76810284,76811791,76811803,76812840,76822131,76822168,76828154,76829215,76829915,76831800,768…	17_76799795_G_A;17_76798548_TTTTTTC_T;	17_76811791_GA_G;		17_76792179_G_A;	17_76833916_T_C;17_76832133_T_C;17_76831800_T_C;17_76829215_A_G;17_76828154_A_G;17_76822168_T_C;17_76822131_A_G;17_76812840_T_C;17_76811803_C_T;17_76811791_GA_G;17_76810284_C_A;17_76808773_T_C;17_76808726_T_C;17_76799795_G_A;17_76798362_C_T;17_76798155_C_T;17_76796463_C_T;17_76792179_G_A;17_76791217_G_A;17_76790279_C_T;17_76789886_C_T;17_76827880_A_G;	17_76833916_T_C;17_76832133_T_C;17_76831800_T_C;17_76829215_A_G;17_76828154_A_G;17_76822168_T_C;17_76822131_A_G;17_76812840_T_C;17_76811803_C_T;17_76811791_GA_G;17_76810284_C_A;17_76808773_T_C;17_76808726_T_C;17_76799795_G_A;17_76798548_TTTTTTC_T;17_76798548_T_C;17_76798362_C_T;17_76798155_C_T;17_76796463_C_T;17_76792179_G_A;17_76791217_G_A;17_76790279_C_T;17_76789886_C_T;17_76827880_A_G;	17_76798548_T_C;	0.452970297029703	17	-1	76783463	76837523			2.826208475247525
ENSG00000056050	ENSG00000056050	Q9NWY4	4_170678993_T_C	rs11540095	7.19113290053847e-21	6.649882935064253e-23	1.0	3.7325606831369084e-30	-1.2405919509279435	7.673982224657795e-26	-1.1582342424073326	9.551625641209698e-10	-0.7756160063929438	1.2461604550044785e-12	-0.869198063972207	202	20428546.77693402	0.1494614309881127	17	0.11312563959664793	False	170678993							4_170678993_T_C;	0.16336633663366334	4	-1	170650616	170679104	1.0	4_170678993_T_C	4.823672183168317
ENSG00000057019	ENSG00000057019	Q96PD2	3_98684579_T_C	rs7638009	7.05859114795186e-08	6.105933346993356e-09	1.0	7.001591359722115e-13	0.38052186526048265	1.4890587992737876e-12	0.2959854874657729	0.3439511003808789	0.277063676297852	0.25241171087163755	0.13311407690312205	202	1135003.4253507394	0.20663735227130844	7	0.5092446499768998	False	98684579,98669857,98675416,98676793,98679141,98683264,98684652,98685053,98686870,98736153								0.19801980198019808	3	-1	98514785	98620533			3.5598857065110483
ENSG00000057608	ENSG00000057608	Q5SX86	10_5865257_T_C		6.907121004154899e-05	1.0704703511062959e-05	1.0	6.971015021196338e-12	-0.4157701383281952	1.5547787818928e-08	-0.3505078924826185	0.05987650983713357	-0.34189347572175505	0.12301317968947413	-0.09235348876718064	78	736921.4012402224	1.2536923280502597	1	0.7770050007386935	False	5865257,5760199,5764998,5767177,5768089,5768140,5770887,5774915,5784151,5793444,5793535,5794652,5797311,5798730,5799144,5799613,5801232,5802065,5805844,5808086,5813361,5823136,5826956,5827329,5828400,5829023,5833748,5835246,5840683,5845061,5849917,5855403,5871547,5874073,5874132	10_5808086_G_A;	10_5840683_GTA_G;10_5829023_TCCC_T;10_5827329_ATCT_A;10_5826956_CATT_C;		10_5855403_G_C;	10_5874132_A_G;10_5874073_G_C;10_5871547_G_T;10_5855403_G_C;10_5849917_C_G;10_5845061_A_G;10_5840683_GTA_G;10_5835246_C_A;10_5833748_G_A;10_5829023_TCCC_T;10_5828400_G_A;10_5827329_ATCT_A;10_5826956_CATT_C;10_5813361_A_G;10_5865257_T_C;		10_5808086_G_A;	0.18811881188118806	10	-1	5807186	5884095			7.214726163366336
ENSG00000058063	ENSG00000058063	Q9Y2G3	3_182513351_T_C	rs9283650	1.059955647978215e-06	1.1129348194269678e-07	1.0	3.053147116267272e-12	0.2981143987036739	1.056631344494428e-07	0.22677436342879914	0.8743618134702373	0.2595089385863476	0.1847210873408443	0.09557214613924103	202	4669154.585033444	0.28128035801663365	10	0.24876862240788736	False	182513351,182499467,182501020,182504827,182505064,182506463,182509174,182513714,182514636,182517073,182521143,182523388,182523413,182523868,182524054,182527198,182528871,182531596,182546378,182546697,182549676,182550851,182551879,182552324,182556608,182557989,182558423,182559414,182563768,182567400,182570789,182572260,182573482,182584720,182584933,182585500,182585686,182587666,182589764,182591147…		3_182617673_C_CGTA;3_182584720_T_TA;3_182572260_AAAAAC_A;3_182528871_TAATG_T;			3_182629859_G_A;3_182629855_C_G;3_182624759_C_T;3_182624011_T_C;3_182619485_C_T;3_182617906_G_A;3_182617673_C_CGTA;3_182617673_C_A;3_182617604_C_A;3_182615740_G_A;3_182615560_G_A;3_182615459_A_G;3_182604826_T_C;3_182598983_G_C;3_182591147_T_G;3_182589764_C_T;3_182587666_T_C;3_182585686_A_T;3_182585500_T_G;3_182584933_T_A;3_182584720_T_TA;3_182573482_A_G;3_182572260_AAAAAC_A;3_182570789_A_G;3_1825…	3_182629859_G_A;3_182629855_C_G;3_182624759_C_T;3_182624011_T_C;3_182619485_C_T;3_182617906_G_A;3_182617673_C_CGTA;3_182617673_C_A;3_182617604_C_A;3_182615740_G_A;3_182615560_G_A;3_182615459_A_G;3_182604826_T_C;3_182598983_G_C;		0.31683168316831684	3	1	182511288	182639423			2.827618333972821
ENSG00000058091	ENSG00000058091	O94921	7_90200640_A_G	rs6465271	7.723958208771176e-06	9.529500119448459e-07	1.0	4.0967136992175104e-10	0.25790713670902105	9.440326174372963e-08	0.24639227462172164	0.1244132802915891	0.23369662487237	0.3640831863491022	0.06679185585768632	202	1013817.7509485504	0.2318312116486921	4	0.24992103691357315	False	90200640,90218346,90219720,90221052,90222467,90223051,90225470,90227810					7_90227810_C_A;7_90225470_C_T;7_90223051_G_T;7_90222467_G_A;7_90221052_C_T;7_90219720_T_C;7_90218346_T_G;7_90200640_A_G;			0.4876237623762376	7	1	90095738	90839905			3.160459217821782
ENSG00000058453	ENSG00000058453	Q5TZA2	1_16817131_T_C	rs157247	0.025125802592702987	0.007779204946470725	1.0	2.959250319826345e-06	-0.3984238743914049	0.9062649629602196	-0.18184734076203865	0.4189125055535981	-0.662380908788045	0.09539671524812003	-0.2123098244006858	202	21850850.058072817	0.11447201246760676	48	0.16485151498726364	False	16817131								0.19306930693069307	1	1	17066768	17299474			3.0548612480476245
ENSG00000058729	ENSG00000058729	Q9BVS4	5_96504938_T_C	rs27310	0.0001882941956474609	3.1584406222967524e-05	1.0	4.099256609207487e-08	0.35487331980901343	4.151782283906309e-10	0.4234840817912267	1.2937674352502773	0.11976660196248412	0.6449725788042739	0.03948194816252126	202	6473666.82364229	0.14193979833509432	11	0.18476046002138466	False	96504938,96505406,96506490,96506796					5_96506796_T_C;5_96506490_T_C;5_96505406_T_C;5_96504938_T_C;			0.4504950495049505	5	-1	96496571	96518964			3.146371113861386
ENSG00000059769	ENSG00000059769	Q9H1X3	9_114400998_G_A	rs1570303	0.020379333792900148	0.006075870674296697	1.0	1.4423977217203088e-05	-0.4931814405872917	0.00015348794456247677	-0.5711780350010508	0.5393560860798721	-0.2278372548540695	0.32422552867992777	-0.1396289358948961	185	1519928.706755575	0.28047734199276514	4	0.19519152772631365	False	114400998,114396888,114407419,114414667,114416298,114417418				9_114416298_T_G;	9_114414667_A_G;9_114407419_T_C;9_114396888_A_C;9_114400998_G_A;	9_114416298_T_G;9_114414667_A_G;9_114407419_T_C;9_114396888_A_C;9_114400998_G_A;		0.14603960396039606	9	1	114393632	114432508			2.012315965346535
ENSG00000060237	ENSG00000060237	Q9H4A3-7	12_863517_G_A	rs3858703	0.08611085075707746	0.03419833360918631	1.0	1.6541657126857174e-05	-0.2474651770115152	0.2754104351165304	-0.2656272492741353	0.6092594499686209	-0.3759912484045782	0.03694683921807616	-0.20032470243265285	202	22919868.12902868	0.1081932414631448	26	0.15251282830519658	True	863517,863833,867023,871211,871472,888320					12_888320_G_A;12_871472_T_A;12_871211_G_C;12_867023_G_A;12_863833_A_G;12_863517_G_A;			0.27722772277227725	12	1	861759	1020618			4.620062138613862
ENSG00000060491	ENSG00000060491	Q9NZT2-2	20_61336009_A_G	rs6122428	0.004220506433800909	0.0010048589589548224	1.0	3.266770869955718e-05	-0.2643824861382199	0.025970105094273492	-0.2903840774227692	0.4845147081497284	-0.264820850225016	0.13474864613492832	-0.12635788384642255	202	4274755.064256902	0.1492782165961577	15	0.19181478341727312	False	61336009,61335907,61336136,61336250,61336359,61337016								0.2747524752475248	20	1	61436187	61445352			3.0577114851485145
ENSG00000060749	ENSG00000060749	Q2KHR3	11_32912657_T_C	rs2746036	0.03638133773719589	0.012107239047974705	1.0	0.0001626079349933134	0.201264346731214	0.004267849741451528	0.15372951557278142	0.21092364306926994	0.3683150916707501	0.1328953967513938	0.14377052708014834	202	32699266.49071107	0.09977802211432764	44	0.13899921135315246	False	32912657,32909897,32911737,32922053,32925802,32926899,32939853,32941634,32945084,32947783,32958609,32980428,32986832,32989033,32990946,32992203,32993406,32996805		11_32989033_GT_G;			11_32993406_G_A;11_32992203_C_T;11_32990946_G_A;11_32989033_GT_G;11_32986832_A_T;11_32980428_G_T;11_32958609_G_A;11_32947783_A_C;11_32945084_C_T;11_32941634_T_C;11_32939853_A_G;11_32926899_G_T;11_32925802_A_G;11_32922053_T_C;		11_32996805_C_T;	0.12623762376237624	11	1	32914724	33014862			4.793589222772277
ENSG00000061273	ENSG00000061273	J3KPH8	12_48160770_T_C	rs60776348	0.004138738085811661	0.000983937381749208	1.0	1.2908577903855357e-06	0.3505515854509084	2.7560490023485123e-11	0.9020731003314841	0.8985798844028201	0.2302617290493305	0.4822104878074448	0.07801768554799128	202	5267913.874700687	0.13240468823007598	16	0.2623346982011311	False	48160770,48156689,48157954,48158146,48158691,48159128,48159721,48160716,48160877,48161782,48162480,48162807,48164219,48165107,48169412,48170264,48170962,48171222,48174275,48174641,48175570,48177906,48178212,48179347,48179478,48180984,48181260,48182072	12_48177906_C_G;			12_48177906_C_G;	12_48182072_G_T;12_48181260_C_T;12_48180984_C_T;12_48179478_T_G;12_48179347_C_T;12_48178212_G_A;	12_48182072_G_T;12_48181260_C_T;12_48180984_C_T;12_48179478_T_G;12_48179347_C_T;12_48178212_G_A;12_48177906_C_G;	12_48177906_C_G;	0.16336633663366334	12	-1	48176505	48226915			3.4892052227722776
ENSG00000061676	ENSG00000061676	Q9Y2A7	2_183923858_C_T	rs2675076	0.055280430635745184	0.01984432022465251	1.0	4.698476091697589e-05	-0.2685765917429789	0.00015308965739107015	-0.307840906855104	3.5836040189715375	-0.3180166616047501	0.6863375777606724	0.04799037881783842	202	52067456.2206484	0.12038590319069405	47	0.14139532314590209	True	183923858								0.1113861386138614	2	-1	183773843	183903586			4.208787380420435
ENSG00000061794	ENSG00000061794	P82673	12_27848783_G_A	rs7133442	0.0042567913112598645	0.001015491126342924	1.0	9.40135481643042e-07	0.21608060316651226	0.00015068748271944625	0.1753726957073845	0.8734367284843128	0.20821595443214905	0.8441069428730716	0.015382038622941518	202	15408121.796543773	0.14291712278448868	12	0.15612018339864278	True	27848783,27849795,27851134,27852089,27852570,27852717,27853166								0.405940594059406	12	1	27863706	27909228			5.188146400990099
ENSG00000061987	ENSG00000061987	Q7Z3U7-5	12_62919497_C_T	rs7136794	2.0790566849200485e-07	1.9444765202518068e-08	1.0	5.741584154944739e-11	0.3212416950442374	0.02651936468376808	0.2086628551688421	0.011748517626028172	0.5051898683324565	3.964650095611808e-08	0.4613178996055036	202	9774596.657547243	0.09968721909303208	37	0.10945338427305393	False	62919497,62846107,62846672,62846785,62850140,62853332,62854241,62854781,62855364,62857016,62857183,62858028,62858281,62858432,62858547,62861111,62861745,62863515,62864248,62865958,62867096,62870374,62875910,62883990,62884542,62884552,62884632,62886759,62888311,62888642,62888729,62892173,62892905,62893881,62897250,62897268,62897996,62900505,62901152,62902833,62905499,62907622,62912059,62914213,629…		12_62914213_C_CTTTG;12_62867096_AAAATGGTGG_A;12_62861744_TC_T;			12_62928297_G_T;12_62927545_G_C;12_62920767_A_T;12_62916144_G_T;12_62914287_G_T;12_62914213_C_CTTTG;12_62912059_G_A;12_62907622_G_C;12_62905499_G_A;12_62902833_A_G;12_62901152_G_A;12_62900505_C_A;12_62897996_C_T;12_62897268_T_C;12_62897250_G_A;12_62893881_T_A;12_62892905_C_G;12_62892173_T_C;12_62888729_C_T;12_62888642_A_G;12_62888311_G_A;12_62886759_G_A;12_62884632_T_C;12_62884552_A_G;12_62884542…	12_62928297_G_T;12_62927545_G_C;12_62920767_A_T;12_62916144_G_T;12_62914287_G_T;12_62914213_C_CTTTG;12_62912059_G_A;12_62907622_G_C;12_62905499_G_A;12_62902833_A_G;12_62901152_G_A;12_62900505_C_A;12_62897996_C_T;12_62897268_T_C;12_62897250_G_A;12_62893881_T_A;12_62892905_C_G;12_62892173_T_C;12_62888729_C_T;12_62888642_A_G;12_62888311_G_A;12_62886759_G_A;12_62884632_T_C;12_62884552_A_G;12_62884542…		0.38613861386138615	12	1	62860597	62991363	0.6618005950722649	12_62932777_G_A	2.115321485148515
ENSG00000062038	ENSG00000062038	P22223	16_68667562_A_T	rs79634167	0.07888685162743675	0.03072182551381038	1.0	0.00013032074042620926	0.2853520070992827	0.0006810435961160233	0.3436430744255428	2.1589831438442784	0.10304329717131333	0.3119938540091716	0.09782388336644088	202	5643912.60625387	0.1994519118107977	17	0.18783192162313334	False	68667562,68673908,68674271								0.18811881188118806	16	1	68670092	68756519			5.639961188118812
ENSG00000062598	ENSG00000062598	Q5JVZ5	20_44978021_G_T	rs4809588	0.003342606178017307	0.0007688424604710297	1.0	1.799803835298114e-06	-0.5385813948089005	0.029944352448898363	-0.4656483849889875	0.05010007038375944	-0.5452047727888042	0.380452826501808	-0.13409625757726218	202	5764921.501322567	0.1338337090386078	21	0.16453816168712732	False	44978021								0.09158415841584157	20	-1	44994688	45061704			2.733330603960396
ENSG00000062822	ENSG00000062822	M0R2B7	19_50850534_C_T	rs4801830	0.0685629799212891	0.025882665368858405	1.0	2.617822128453025e-05	-0.18216276999088765	0.01453993853095555	-0.17590105510867082	0.20452060084429646	-0.2733116744124029	0.28639973298958843	0.06709668988745843	202	46654699.31560201	0.08144257739752023	53	0.1338771846102552	False	50850534,50851330,50851759,50852276,50853352,50853646,50854091,50854149,50854260,50855094,50855236,50855701,50855792,50855878,50855935,50856335,50857354,50857385,50857409,50857807,50857823,50858088,50858179,50860233								0.3762376237623761	19	1	50887461	50921273			4.398069554455446
ENSG00000063046	ENSG00000063046	E7EX17	12_53391501_G_A	rs7485642	0.006234453570047281	0.0015668233424899346	1.0	1.8385951227372703e-06	-0.3423107497682971	1.5305210295728395e-05	-0.31691229070368765	0.06750647074340467	-0.4770462244937314	0.574005246166702	0.06354977062569532	202	69056533.26203896	0.09245265475405966	21	0.16442613405419512	False	53391501,53381811,53383879,53384547,53385124,53388469,53393964,53406838,53408580,53434105,53436855				12_53434105_C_A;	12_53408580_A_G;12_53406838_A_G;	12_53408580_A_G;12_53406838_A_G;		0.18811881188118806	12	1	53399942	53435993			7.449128915841584
ENSG00000063761	ENSG00000063761	Q86TW2-2	14_78203713_T_C	rs45519831	6.676424193096203e-16	1.4770504184656235e-17	1.0	1.6503263939923887e-25	1.4717516758074365	2.1574347216832097e-22	1.4108167524576405	0.002547353323148359	0.7436463741278305	0.14279498095383306	0.2989365508612449	158	490151.94152337353	0.44485373052027577	2	0.3749845373160959	False	78203713,78089870,78102991,78106225,78106507,78107271,78122189,78125855,78125978,78135510,78135667,78136458,78137126,78138187,78141494,78142964,78144575,78146606,78147779,78147967,78151793,78152719,78153052,78153269,78154069,78154856,78155278,78156189,78156487,78157096,78157186,78158063,78158945,78160082,78177551,78180357,78183451,78185723,78187032,78187451,78188937,78192623,78193545,78195691,782…		14_78355660_ATATAAT_A;			14_78370713_A_G;14_78368295_C_A;14_78364382_C_G;14_78362176_T_C;14_78361654_C_G;14_78359223_A_T;14_78358958_G_A;14_78358359_G_C;14_78356172_C_G;14_78355660_ATATAAT_A;14_78347589_C_T;14_78342185_G_C;14_78339266_G_T;14_78312433_C_A;14_78309929_G_A;14_78282680_A_C;14_78280145_C_T;14_78275824_C_T;14_78273784_A_G;14_78273568_C_T;14_78271094_C_T;14_78268930_A_C;14_78268840_C_T;	14_78370713_A_G;14_78368295_C_A;14_78364382_C_G;14_78362176_T_C;14_78361654_C_G;14_78359223_A_T;14_78358958_G_A;14_78358359_G_C;14_78356172_C_G;14_78355660_ATATAAT_A;14_78347589_C_T;14_78342185_G_C;14_78339266_G_T;14_78312433_C_A;14_78309929_G_A;14_78282680_A_C;14_78280145_C_T;14_78275824_C_T;14_78273784_A_G;14_78273568_C_T;14_78271094_C_T;14_78268930_A_C;14_78268840_C_T;		0.0891089108910891	14	1	78266426	78401355			1.6162999801980196
ENSG00000063978	ENSG00000063978	H0YAI5	4_2467751_C_T	rs35400491	0.03309393976120822	0.010757564171470821	1.0	6.62990084484906e-07	0.4392376175646817	6.237230911556059e-06	0.34313965182878536	0.032254164736281704	0.34265084263662593	0.05271855510868674	0.3154255783600606	116	242982.707352648	0.2992921882354885	1	0.3989320170185705	False	2467751,2470892,2481490				4_2470892_C_G;	4_2481490_G_A;			0.15594059405940594	4	1	2463947	2627047			4.001178163366337
ENSG00000064042	ENSG00000064042	Q9UPQ0-10	4_41319184_A_G	rs6844145	6.086999979461787e-08	5.208471245448398e-09	1.0	9.869534559965549e-15	1.2108067361546857	9.697194927804893e-13	1.3059759156034152	9.507716382032021e-05	0.995089604761236	0.004657240673815514	0.6569886079435661	99	1596963.3745555063	0.9738807708587264	1	0.5371287096998062	False	41319184,41308647,41314694,41328487,41330010,41330982,41331251,41331266,41332427,41332876,41333410,41333429,41333674,41335150,41335413,41335420,41337746,41339317,41339734,41340289,41346529								0.07920792079207921	4	1	41361624	41702061	0.5092577267918695	4_41363521_G_A	1.1330592356435645
ENSG00000064199	ENSG00000064199	Q15506	11_124597824_T_C	rs61247811	0.002767166282958422	0.0006196405360294348	1.0	2.2244976508480505e-07	-0.9611012702226136	7.857382983133452e-08	-1.038617420412036			0.000306414835963504	-1.0694414100530878	119	358907.7704556781	0.3050123279636125	1	0.2690371095721111	False	124597824,124596741,124597044,124597887								0.06435643564356436	11	1	124543694	124567414			1.2634057346534653
ENSG00000064225	ENSG00000064225	A0A087WXB8	3_98436880_G_A	rs12496694	1.1728085727223953e-11	5.216753571748919e-13	1.0	3.127748834619875e-15	0.5574623916633397	1.0216052689752746e-05	0.45997333992556105			0.7542379057044046	0.045390414772443086	106	296932.12839932315	0.4191912224974499	1	1.1705696129125358	False	98436880,98437140,98437610,98438441,98441240,98442051,98442105,98442322,98442341,98442701,98443110,98443248,98443441,98444732,98445534,98447074,98447140,98447145,98447241,98447448,98448131,98448477,98449191,98449742,98449880,98450503,98452653,98454663,98455672,98457269,98457735,98458220,98458229,98458724,98459174,98461789,98462103,98466488,98468874,98471376,98477091		3_98459174_C_CTAAT;3_98458229_AAAC_A;3_98458220_AAAAC_A;3_98454663_TAGGAA_T;			3_98477091_A_T;3_98471376_C_T;3_98468874_T_G;3_98466488_A_G;3_98462103_G_A;3_98461789_C_T;3_98459174_C_CTAAT;3_98458724_A_G;3_98458229_AAAC_A;3_98458220_AAAAC_A;3_98457735_G_C;3_98457269_C_A;3_98455672_C_T;3_98454663_TAGGAA_T;3_98452653_T_G;	3_98477091_A_T;3_98471376_C_T;3_98468874_T_G;3_98466488_A_G;3_98462103_G_A;3_98461789_C_T;3_98459174_C_CTAAT;3_98458724_A_G;3_98458229_AAAC_A;3_98458220_AAAAC_A;3_98457735_G_C;3_98457269_C_A;3_98455672_C_T;3_98454663_TAGGAA_T;3_98452653_T_G;		0.2747524752475248	3	1	98451080	98540045			1.359394291574688
ENSG00000064309	ENSG00000064309	Q4KMG0	11_125902195_A_C	rs55736113	0.09286670226671363	0.03757932690343311	1.0	8.854605625487858e-05	0.35370082628465443	0.0012128258632329914	0.2952088327902576			0.4389057962779177	0.131642644895688	141	3820746.8830249673	0.6307281125799666	1	0.7061896810402117	False	125902195,125882097,125882398,125885591,125889258,125891594,125894957,125906879,125908462					11_125908462_G_A;11_125906879_C_G;11_125894957_G_A;11_125891594_G_A;11_125889258_A_G;11_125885591_C_T;11_125882398_G_A;11_125882097_T_C;11_125902195_A_C;	11_125885591_C_T;11_125882398_G_A;11_125882097_T_C;		0.12376237623762375	11	-1	125825691	125933230			2.451605108910891
ENSG00000064651	ENSG00000064651	P55011	5_127498380_C_T	rs790155	0.0004961291885795713	9.117673253774164e-05	1.0	4.382011958000715e-09	0.33541935906324005	0.20516598665964195	0.1897761854700696	0.032542210782181016	0.3639451909399223	0.00015913860028851268	0.36773089966965467	202	8016238.816370103	0.14104046498519204	21	0.24604264014369856	False	127498380,127350549,127357526,127364103,127367998,127388844,127406259,127431285,127432908,127433047,127433798,127441861,127448066,127453735,127455008,127476971,127487603,127501235,127508074,127524018,127533085		5_127432908_T_TAGA;		5_127524018_T_C;	5_127501235_A_G;5_127487603_A_G;5_127476971_C_A;5_127455008_C_T;5_127453735_T_A;5_127448066_A_C;5_127441861_C_A;5_127433798_A_G;5_127433047_A_T;5_127432908_T_A;5_127432908_T_TAGA;5_127431285_A_G;5_127498380_C_T;	5_127501235_A_G;5_127487603_A_G;5_127476971_C_A;5_127455008_C_T;5_127453735_T_A;5_127448066_A_C;5_127441861_C_A;5_127433798_A_G;5_127433047_A_T;5_127432908_T_A;5_127432908_T_TAGA;5_127431285_A_G;5_127498380_C_T;		0.27722772277227725	5	1	127419458	127525380			1.6490826198019801
ENSG00000064652	ENSG00000064652	A8MXB7	5_122264932_C_A	rs17149745	0.011365308300283188	0.0031064023037763364	1.0	1.8698093035362592e-06	0.5611705884896292	0.0002125293318836648	0.44415117666769904	0.6918892329727007	0.3498541224676688	0.2221261874377761	0.1548526808999906	202	745597.4968371186	0.2171329379360272	5	0.32661712008786603	False	122264932,122087617,122095810,122102994,122111005,122111339,122114253,122116089,122116739,122116803,122126925,122126980,122129414,122131511,122136677,122151988,122158903,122159010,122164783,122182504,122191182,122192135,122194981,122205645,122212163,122214337,122217367,122221912,122228568,122240105,122248486,122249257,122249520,122258673,122262354,122265135,122267367,122269536,122281651,122290866…		5_122194981_CAT_C;			5_122290866_T_A;5_122281651_C_T;5_122269536_T_C;5_122267367_A_G;5_122262354_T_G;5_122258673_C_T;5_122249520_G_A;5_122249257_G_A;5_122248486_G_C;5_122240105_C_T;5_122228568_A_G;5_122221912_G_T;5_122217367_T_A;5_122214337_A_G;5_122212163_C_T;5_122205645_G_A;5_122194981_CAT_C;5_122192135_G_A;5_122191182_T_G;5_122182504_C_G;5_122264932_C_A;	5_122290866_T_A;5_122281651_C_T;		0.1113861386138614	5	1	122179134	122365049			2.557663945544555
ENSG00000064666	ENSG00000064666	B4DUT8	19_1033360_A_T	rs55725239	0.00275883164298848	0.0006171283237447016	1.0	1.710432169490962e-08	-0.422373353437957	8.926334201598138e-12	-0.5859672620652809	0.00024006000842066402	-0.2972357244771069	1.0531731304276092e-05	-0.2817791931075417	202	92299290.95445225	0.15064344323336376	12	0.12685070675707455	False	1033360,1030320,1032702,1032756	19_1032702_C_T;		19_1032702_C_T;	19_1032756_C_T;	19_1032756_C_T;19_1032702_C_T;19_1030320_G_T;19_1033360_A_T;	19_1032756_C_T;19_1032702_C_T;19_1030320_G_T;19_1033360_A_T;		0.3193069306930693	19	1	1026298	1039068	0.4410013835964546	19_1031438_C_T	7.02260193069307
ENSG00000064692	ENSG00000064692	D6R9G8	5_121768585_G_A	rs304380	0.0010112302745611096	0.00020039949137679486	1.0	1.0826655149218942e-06	0.3107167898493555	0.0001131469054765599	0.3646509646791225			0.5583354317255836	-0.07296990957863825	111	602639.1227374928	0.3131861027987739	1	0.5463186055904542	False	121768585,121751224,121751363,121752508,121753782,121753910,121756119,121758397,121763071,121765728,121768671		5_121763071_GT_G;			5_121768671_G_A;5_121765728_T_C;5_121763071_GT_G;5_121758397_A_C;5_121756119_G_A;5_121753910_C_T;5_121753782_C_T;5_121752508_C_T;5_121751363_G_C;5_121751224_T_C;5_121768585_G_A;	5_121768671_G_A;5_121765728_T_C;5_121763071_GT_G;5_121758397_A_C;5_121756119_G_A;5_121753910_C_T;5_121753782_C_T;5_121752508_C_T;5_121751363_G_C;5_121751224_T_C;5_121768585_G_A;		0.4232673267326733	5	1	121647049	121799914			1.1226284326732674
ENSG00000064726	ENSG00000064726	Q9H0C5	15_83789908_T_C	rs4843071	0.005377785192099849	0.0013276072773192767	1.0	2.2151220624109155e-06	-0.5097147093306535	0.0010825577394836014	-0.2976878225787467	0.10967882735575417	-0.6478984014937588	0.11716156690934296	-0.19667995470853086	193	996581.3385494384	0.3469940410427825	5	0.5008317627287164	False	83789908,83817323								0.10643564356435643	15	-1	83685174	83736106			4.244753950495049
ENSG00000064763	ENSG00000064763	Q96K12	12_29377548_C_T	rs7957101	5.560142626369646e-07	5.6102574551453044e-08	1.0	2.0919787431046845e-10	-0.5760072804963604	1.4781392342337692e-08	-0.4919169117475913	0.96377089420381	-0.25492717809272	0.002522817843841629	-0.2537520371151362	193	1270002.894221074	0.2321245851583327	8	0.5755671115442249	False	29377548,29371578,29373627,29373899,29375187,29377554,29387367,29387368					12_29387368_T_C;12_29387367_TT_GC;12_29387367_TT_GC;12_29387367_T_G;12_29377554_T_G;12_29375187_C_G;12_29373899_G_A;12_29373627_T_A;12_29371578_A_T;12_29377548_C_T;			0.4232673267326733	12	1	29302036	29493913			3.0635571831683173
ENSG00000064933	ENSG00000064933	P54277-3	2_190935719_G_A	rs72909350	0.043987683801119885	0.015241903703959343	1.0	6.839558760212958e-05	-0.5263024770972295	0.07153028083016276	-0.3758060932628126	0.053107929716653283	-0.7305430440302284	0.7763536176034487	0.04541309916367586	202	24640047.06733297	0.08482916623289366	39	0.08454828347021713	True	190935719,190921242								0.05198019801980198	2	1	190649107	190742355			3.8337654516288038
ENSG00000064999	ENSG00000064999	Q92625	6_35047938_A_G		0.02645498575202464	0.008277440818817962	1.0	2.1677868035029048e-05	-0.16926493976694354	0.0003313098475538473	-0.2386372551007349	0.20902091894507646	-0.3248729358161269	0.020047819632061724	-0.1865862181680096	202	12250432.888065942	0.11254975118198084	30	0.262546528189047	False	35047938,35017003,35023130,35038086,35045281,35047579,35047732,35048018,35049054,35052635,35053383,35054983,35061714,35062058,35064681,35066091,35066624,35068696,35069669,35071114,35072444,35073286,35075148,35078623,35079956,35080229,35081931,35091228,35092135,35099307,35100159,35104018		6_35054983_GGCAGCGTAGACGCT_G;6_35053383_CTAGGAAGAG_C;6_35048018_G_GC;			6_35054983_GGCAGCGTAGACGCT_G;6_35053383_CTAGGAAGAG_C;6_35052635_A_G;6_35049054_A_G;6_35048018_G_GC;6_35047732_T_C;6_35047579_G_C;6_35045281_G_A;6_35038086_C_T;6_35023130_G_A;6_35017003_G_A;6_35047938_A_G;			0.4801980198019802	6	1	34857042	35059179			3.5498168910891095
ENSG00000065000	ENSG00000065000	O14617-5	19_2129029_C_A	rs59192911	6.585821694631978e-14	1.996637971332883e-15	1.0	4.266705524986874e-23	-0.6956886091440094	2.787199910909313e-11	-0.5400212691401015	0.014778405054688531	-0.6197961435656612	0.0019307327593369832	-0.3260669139528793	202	34220387.81995882	0.09244689593636816	43	0.13243070300632634	True	2129029		19_2128668_CACAGCTCCGACACTGCACCCCGTGGAGCCGGCCCGCCCCCGCCGCTCCGACACTGCACCCCGTGGAGCCGGCCCGCCCCACAGCTCCGACACTGCACCCCGTGGAGCCGGCCCGCCCCCGCCGCTCCGACACTGCACCCCGTGGAGCCGGCCCGCCCCACAGCTCCGACACTGCACCCCGTGGAGCCGGCCCGCCCCCGCCGCTCCGACACTGCACCCCGTGGAGCCGGCCCGCCCCCGCCGCTCCAACACTGCACCCCGTGGAGCCGGCCCGCCCCCGCCGCTCCGACACTGCACCCCGTGGAGCCGGCCCGCCCCCGCCGCTCCGACACTGCACCCCGTGGAGCCGGCCCGCCCCCGCCGCTCCGACACTGCACCCCGTGGAGCC…			19_2129029_C_A;19_2128668_CACAGCTCCGACACTGCACCCCGTGGAGCCGGCCCGCCCCCGCCGCTCCGACACTGCACCCCGTGGAGCCGGCCCGCCCCACAGCTCCGACACTGCACCCCGTGGAGCCGGCCCGCCCCCGCCGCTCCGACACTGCACCCCGTGGAGCCGGCCCGCCCCACAGCTCCGACACTGCACCCCGTGGAGCCGGCCCGCCCCCGCCGCTCCGACACTGCACCCCGTGGAGCCGGCCCGCCCCCGCCGCTCCAACACTGCACCCCGTGGAGCCGGCCCGCCCCCGCCGCTCCGACACTGCACCCCGTGGAGCCGGCCCGCCCCCGCCGCTCCGACACTGCACCCCGTGGAGCCGGCCCGCCCCCGCCGCTCCGACACT…			0.2425742574257425	19	-1	2100988	2164464			4.885173737623763
ENSG00000065029	ENSG00000065029	P36508-2	6_35200350_G_T		1.731258804822288e-24	7.295483667751653e-27	1.0	9.188250065323929e-31	-1.0384231255002108	2.2774692445026105e-14	-0.918551744345507	0.09210909010898452	-0.2554491427920422	0.2283639150640164	-0.16598092010162446	123	205488.8683587198	0.2401017169509859	1	0.30600867787948816	False	35200350,35158796,35159411,35159695,35159805,35160470,35163602,35163735,35164004,35166157,35169049,35174642,35174858,35178029,35179624,35188925,35190120,35193773,35197035,35201858,35205541,35205881,35215954,35223137,35224600,35227832,35228215,35230035,35233443,35235871,35238623,35239994,35241239,35241640,35244531,35245737,35246903,35247166,35249908,35250440,35253702,35256719,35256934,35258539,352…		6_35247166_T_TC;6_35241640_GA_G;6_35230035_TGAG_T;		6_35263555_A_G;6_35258539_C_A;	6_35258539_C_A;6_35256934_C_A;6_35256719_T_C;6_35250440_C_A;6_35249908_C_T;6_35247166_T_TC;6_35247166_T_C;6_35246903_G_A;6_35245737_T_C;6_35244531_G_A;6_35241640_GA_G;6_35241239_T_C;6_35239994_T_C;6_35238623_T_C;6_35235871_G_A;6_35233443_A_G;6_35230035_TGAG_T;6_35228215_G_T;6_35227832_T_C;	6_35263555_A_G;6_35258539_C_A;6_35256934_C_A;6_35256719_T_C;6_35250440_C_A;6_35249908_C_T;6_35247166_T_TC;6_35247166_T_C;6_35246903_G_A;6_35245737_T_C;6_35244531_G_A;6_35241640_GA_G;6_35241239_T_C;6_35239994_T_C;6_35238623_T_C;6_35235871_G_A;6_35233443_A_G;6_35230035_TGAG_T;6_35228215_G_T;6_35227832_T_C;		0.14356435643564355	6	1	35226686	35263762			2.13295548019802
ENSG00000065054	ENSG00000065054	Q15599	16_2038484_C_G	rs28410443	0.06143626102442544	0.022516321347006443	1.0	7.26943339432352e-05	0.2949927439740435	0.6016819254090309	0.18788615172564216	2.61563058272587	0.13202525206296034	0.021085591654498883	0.2174546763309521	202	5205218.291779236	0.18905584574759265	9	0.2357186709259461	True	2038484								0.3193069306930693	16	1	2075357	2089027			2.35358647029703
ENSG00000065060	ENSG00000065060	Q6BDS2	6_34744014_A_G		0.00017020245571690076	2.826062900280656e-05	1.0	2.38963200198003e-07	0.3061083563628644	1.151179749022479e-06	0.3181581974451673	0.011874640859594507	-0.052851720707378536	0.009453892111196556	-0.2664684559313785	202	3392066.7332862318	0.17893031266186396	13	0.2558722768829398	False	34744014								0.2995049504950495	6	1	34759857	34850915			3.163260727722772
ENSG00000065268	ENSG00000065268	U3KQC1	19_984218_C_T	rs8112598	1.2075033981099745e-09	7.477107545360838e-11	1.0	2.428267641498866e-16	-0.7258801292429282	1.6352006063792236e-12	-0.7104705050407282	0.018643414412152986	-0.3693644335540731	8.483963475667094e-06	-0.4927851999395201	202	27014383.90521273	0.1606459165814328	14	0.2072319243032186	False	984218,984987,985251,985997,986624,986825,987051,987365,987533,987571,988096,988668,990185					19_990185_G_C;19_988668_T_C;19_988096_C_T;19_987571_C_G;19_987533_T_C;19_987365_A_G;19_987051_A_G;19_986825_T_C;19_986624_A_G;19_985997_C_G;19_985251_T_C;19_984987_T_C;19_984218_C_T;	19_990185_G_C;19_988668_T_C;19_988096_C_T;19_987571_C_G;19_987533_T_C;19_987365_A_G;19_987051_A_G;19_986825_T_C;19_986624_A_G;19_985997_C_G;19_985251_T_C;19_984987_T_C;		0.2995049504950495	19	1	983174	994569	1.0	19_984218_C_T	4.7101621485148515
ENSG00000065308	ENSG00000065308	Q15035	6_52287195_G_A		0.06528961880638351	0.02430305370529083	1.0	4.64630625677767e-05	0.1841541635466747	0.0011499003664756148	0.12502228272004026	1.0193544606118563	0.1818568265373832	0.37779251961212734	0.11687025640451985	133	634585.630084983	0.377195342165792	2	0.5630073204892989	False	52287195,52287196,52291968								0.2524752475247525	6	-1	52362200	52441713			2.8115618960396036
ENSG00000065328	ENSG00000065328	Q7L590	10_13193524_T_C		0.025481615699082232	0.007907264803730187	1.0	1.5246936380953332e-05	0.22944291769264816	0.0015701247346443794	0.19529028070800755	0.43475046217440394	0.3019347152625995	0.6142590114180212	-0.03930261314400063	202	1326063.841898506	0.3488257773432918	9	0.3451725427406756	False	13193524,13194940								0.4455445544554456	10	1	13203554	13253104			3.5472660049504956
ENSG00000065457	ENSG00000065457	Q9BUB4	16_75634014_A_G	rs7206481	6.953179308088624e-13	2.596352802622347e-14	1.0	1.2883199730733804e-21	0.8372564606149836	9.974079562067476e-12	0.5943885952515685	1.1976226599301434	0.30559934758292984	0.6874009614345833	-0.061616312730240035	175	963129.8620525616	0.27572829653514824	5	0.3429176056807294	False	75634014,75555314,75555780,75557142,75558054,75560152,75560416,75560602,75561030,75561093,75561195,75563330,75563746,75564287,75565132,75565845,75568433,75574729,75575410,75579111,75581160,75581548,75606360,75609434,75609657,75613074,75615943,75636185,75639207,75657063,75672885,75679103,75679181				16_75634014_A_G;	16_75657063_A_T;16_75639207_G_C;16_75636185_C_T;16_75634014_A_G;	16_75657063_A_T;16_75639207_G_C;16_75636185_C_T;16_75634014_A_G;		0.16831683168316833	16	-1	75630879	75657198			2.556406277227723
ENSG00000065485	ENSG00000065485	Q14554	3_122819587_T_G	rs2589597	0.041170259523934105	0.01404791133235022	1.0	6.934506299558258e-06	-0.31265883454317	0.00019187154385980607	-0.4744036567355335	0.00031625098062185733	-0.5718998800786907	0.011318918246290995	-0.26943163555993443	202	20893009.237721726	0.11829259810139765	21	0.13312184863003054	False	122819587,122820232,122820732,122822279,122822294,122822325,122822685,122823057,122823803,122824372,122824513,122824813,122825040,122825854					3_122825854_C_T;3_122825040_T_C;3_122824813_A_G;3_122824513_A_G;3_122824372_G_T;3_122823803_C_T;3_122823057_A_G;3_122822685_C_G;3_122822325_A_G;3_122822294_C_T;3_122822279_C_T;3_122820732_C_T;3_122820232_G_A;3_122819587_T_G;	3_122825854_C_T;3_122825040_T_C;3_122824813_A_G;3_122824513_A_G;3_122824372_G_T;3_122823803_C_T;3_122823057_A_G;3_122822685_C_G;3_122822325_A_G;3_122822294_C_T;3_122822279_C_T;3_122820732_C_T;3_122820232_G_A;3_122819587_T_G;		0.2079207920792079	3	1	122785909	122944074			3.2003149527602393
ENSG00000065534	ENSG00000065534	Q15746-6	3_123543783_C_T	rs3851983	1.4715949883865272e-19	1.5847681017389734e-21	1.0	4.404397959380533e-26	0.8765335003898947	5.484100990074854e-20	0.6711073987068541	0.00020723175339904069	0.8205067558543697	1.0107686335187158e-09	0.6238058204869837	202	6189749.333585204	0.12993227774112942	27	0.1848880737652239	True	123543783,123556171,123559835,123561003,123568102,123568826,123571754,123584488,123594419,123599681,123600144,123604942,123605216,123606952,123607884,123610343,123610607,123620718,123624252,123624772,123625634,123626813,123635213,123645893,123650432,123652895,123653909,123654633,123664105,123665902,123666192,123670721,123672787,123674337,123676696,123678162					3_123600144_A_G;3_123599681_C_T;3_123594419_T_G;3_123584488_A_G;3_123571754_G_A;3_123568826_C_T;3_123568102_T_C;3_123561003_C_T;3_123559835_T_G;3_123556171_C_A;3_123543783_C_T;	3_123600144_A_G;3_123599681_C_T;3_123594419_T_G;3_123584488_A_G;3_123571754_G_A;3_123568826_C_T;3_123568102_T_C;3_123561003_C_T;3_123559835_T_G;3_123556171_C_A;3_123543783_C_T;		0.3094059405940594	3	-1	123328896	123603178	1.0	3_123543783_C_T	1.4567821403696124
ENSG00000065548	ENSG00000065548	Q8WU90	2_187379427_C_G	rs7581557	0.004340511115380696	0.0010390196922572307	1.0	1.7617021272269086e-07	-0.216951760916436	1.7650378104895183e-06	-0.28185266598369946	0.1449238394847683	-0.32914790342812195	0.044066346090282205	-0.18800435466003385	202	39745639.41378023	0.07867915923425907	22	0.17519468544881245	False	187379427,187067712,187098102,187098370,187099929,187129322,187130573,187131068,187131751,187132414,187135338,187136708,187136749,187138410,187140763,187143517,187143925,187144097,187144882,187145199,187145664,187146636,187148555,187150638,187151057,187157166,187157175,187157415,187157459,187157687,187160262,187160368,187163267,187163416,187163579,187164011,187165208,187168868,187168900,187169224…		2_187353550_C_CTA;2_187351344_C_CGT;			2_187371029_G_C;2_187369832_T_C;2_187368194_T_C;2_187367534_T_C;2_187366717_A_G;2_187366679_T_C;2_187364811_G_A;2_187364063_G_A;2_187363779_G_A;2_187362423_T_C;2_187362158_C_A;2_187361056_T_C;2_187359344_A_G;2_187357416_T_G;2_187356546_G_T;2_187353550_C_CTA;2_187353550_C_A;2_187352583_T_C;2_187351344_C_CGT;	2_187369832_T_C;2_187368194_T_C;2_187367534_T_C;2_187366717_A_G;2_187366679_T_C;2_187364811_G_A;2_187364063_G_A;2_187363779_G_A;2_187362423_T_C;2_187362158_C_A;2_187361056_T_C;2_187359344_A_G;2_187357416_T_G;2_187356546_G_T;2_187353550_C_CTA;2_187353550_C_A;2_187352583_T_C;2_187351344_C_CGT;		0.4381188118811881	2	1	187350883	187374090			5.124073252815973
ENSG00000065559	ENSG00000065559	P45985	17_12024483_A_G	rs2159011	0.06897470995799107	0.02608222167743056	1.0	0.00012735704257939087	-0.28809348079538644	0.15530987855178158	-0.16476449456346035	0.1220071600693156	-0.31774716329592523	0.4025915220131905	-0.07679472032838675	202	9062957.463293318	0.11967208779003174	15	0.18637866800520347	True	12024483					17_12024483_A_G;	17_12024483_A_G;		0.30445544554455445	17	1	11924141	12047147			3.510904851485148
ENSG00000065600	ENSG00000065600	Q9H813	1_212515613_C_T	rs1774249	1.6712545186370843e-05	2.224296368594598e-06	1.0	6.520166164231198e-10	-0.3632511158143979	7.005967052420822e-05	-0.33092220270263684	0.04882438315419363	-0.25842680798543705	0.25607296948055475	-0.14104314943262974	140	937063.8800343622	0.2071851084342636	3	0.3837772988800551	False	212515613,212437442,212440088,212441128,212447665,212450216,212451017,212452912,212455024,212456714,212459015,212463792,212465827,212466239,212466604,212476519,212479689,212482852,212487311,212491633,212498198,212498652,212499895,212500433,212500693,212504204,212509762,212512128,212513248,212516245,212530980,212530981,212531263,212534377,212537553,212537702,212537707,212542410,212549357,212552316				1_212537707_C_T;1_212537702_G_A;1_212537553_G_A;	1_212552316_C_T;1_212542410_T_C;			0.34405940594059403	1	-1	212537273	212588243			2.97738268349146
ENSG00000065665	ENSG00000065665	Q9H9S3-3	10_12169558_C_A		0.029631781399150462	0.009460432474890888	1.0	7.947604991288373e-06	-0.4899015957060292	0.0006490719602340058	-0.5539649372796794	0.15118152192713336	-0.3631010326489377	0.39709448107045703	-0.1131830962113014	202	1314936.2484128578	0.2868499016480858	3	0.4338181522288165	False	12169558								0.10148514851485148	10	1	12171636	12211960			2.905732222772277
ENSG00000065675	ENSG00000065675	A0A087X0I9	10_6682022_T_C		8.425565674809024e-18	1.2722673206723213e-19	1.0	2.127352795213465e-32	1.052222849386589	1.8134456143094583e-29	1.0339566083442773	3.735280507769765e-10	0.9040668992342268	1.330558337753051e-16	0.8055077988852407	202	3060195.6571904616	0.26862534020233225	16	0.18121571189295752	False	6682022,6672988,6676280,6676809,6686635								0.2747524752475248	10	-1	6469105	6622263	0.9147812802623232	10_6674774_G_A	2.7340136732673272
ENSG00000065809	ENSG00000065809	Q9H098	10_15002983_A_G		0.0694795421810487	0.02633439746953478	1.0	2.3342228885471114e-05	0.2682040381954435	15.261898405163489	0.053673382835363284	0.1032063702170593	0.2375918848492793	0.10200849541542338	0.19218421691452514	121	268531.2975535393	0.2511684334041876	1	0.18366037282647216	False	15002983,15002140,15003278,15003359,15003367								0.4232673267326733	10	-1	14560556	14816896			2.681650554455446
ENSG00000065883	ENSG00000065883	Q14004	7_39796229_G_A	rs6951760	0.05461704985374157	0.019575818951786717	1.0	5.789140712166731e-05	-0.3742148164548797	6.179417083508791e-05	-0.3184522006758322	0.1234331293744444	-0.4928405688701193	0.08054151197565418	-0.20414077569827693	202	9268875.7414564	0.12079200239213896	26	0.1511569930321126	False	39796229,39792256,39801286,39802284								0.11633663366336636	7	1	39989636	40136733			3.295099683168317
ENSG00000066084	ENSG00000066084	Q9P265	12_51138862_C_T	rs1047912	4.2896609785442445e-09	2.937436114302216e-10	1.0	6.986253780366784e-17	0.4496342898859839	4.6881442533223216e-34	1.2293399059819552	5.578512839229529e-10	0.6920437069463028	1.0640364929041229e-15	0.6589861166716231	202	11555226.622200275	0.1466113710399157	37	0.12208213375972847	False	51138862,50893518,50898728,51046224,51064064,51073523,51074873,51117593,51128832,51138687				12_51138687_A_C;12_51138862_C_T;	12_51128832_A_G;12_51117593_C_A;12_51074873_T_A;12_51073523_G_A;12_51064064_A_G;12_51046224_G_A;	12_51138687_A_C;12_51128832_A_G;12_51117593_C_A;12_51138862_C_T;		0.297029702970297	12	1	50898768	51142450	1.0	12_51138862_C_T	3.0943192029702966
ENSG00000066117	ENSG00000066117	Q96GM5	12_50448190_C_T	rs12821615	0.059878102902425075	0.021819095673094844	1.0	0.00022080330224960096	0.2734396699374204	0.663240915471236	0.16498299907122266	0.09959161669121586	0.5507262694496271	0.03821459989382848	0.14575691801746204	202	31311946.5088349	0.11554064674580908	24	0.15781806587167993	True	50448190								0.20297029702970296	12	1	50478755	50494495			5.5334593267326735
ENSG00000066136	ENSG00000066136	Q13952	1_41187638_G_C	rs9438948	0.04395588090846648	0.015219653017352662	1.0	1.633658020541862e-05	0.3085990805089864	4.411740612029557e-08	0.6929195124324119	1.874763421275352	0.10843412349942322	0.7829451630755773	0.03014574344675292	202	9806913.71099355	0.12568077475100667	8	0.18763173642621825	True	41187638					1_41187638_G_C;			0.24504950495049505	1	1	41157320	41237275			3.0972655765640544
ENSG00000066427	ENSG00000066427	A0A087X1A8	14_92567869_A_G	rs10150904	0.0005177455525780741	9.557353815002023e-05	1.0	1.0767667671779704e-07	-0.21475437630397887	0.00048670922610260646	-0.4386690498152536	0.4522431490594986	-0.4890353528658296	0.06706885541795138	-0.16011704463708476	202	2238333.0289621498	0.11336855260099335	9	0.20971153183271424	False	92567869					14_92567869_A_G;	14_92567869_A_G;		0.349009900990099	14	-1	92524896	92572965			2.3167729059405944
ENSG00000066557	ENSG00000066557	Q9H9A6	1_70614427_T_C	rs476591	0.0013814013708987824	0.00028281294600280584	1.0	2.458535278449809e-06	-0.3216839987213692	0.00028672369886480117	-0.2456829559958621	3.252269399273695e-05	-0.4385321226136049	2.7788804539547053e-05	-0.3401720365946821	202	37596463.42080502	0.12601415673266245	27	0.11798099513634967	False	70614427,70608053,70608132,70609129,70610146,70610215,70610738,70611208,70618409,70620147,70620329,70625637,70627063,70627355,70630925,70634463,70636364,70641177,70643909,70646053,70646293,70646431,70646502,70647802,70649135,70651015,70654078,70658272,70672605,70679891,70686213,70690540,70711236		1_70610738_C_CTA;		1_70611208_A_T;1_70610738_C_CTA;	1_70658272_T_A;1_70654078_C_T;1_70651015_T_C;1_70649135_C_T;1_70647802_C_T;1_70646502_C_G;1_70646431_A_C;1_70646293_T_C;1_70646053_A_G;1_70643909_C_T;1_70641177_T_A;1_70636364_C_T;1_70634463_C_T;1_70630925_G_C;1_70627355_C_T;1_70627063_A_G;1_70625637_A_G;1_70620329_T_G;1_70620147_T_C;1_70618409_C_T;1_70614427_T_C;			0.1806930693069307	1	-1	70610488	70671303	0.967760122412378	1_70651015_T_C	4.656885865248655
ENSG00000066583	ENSG00000066583	Q96CN7	5_128471870_A_C	rs11745723	0.07087251132183629	0.027011693417288887	1.0	1.905636079675596e-05	0.4031535555471408	0.0005742371818776497	0.2923320569365119	0.3853367712824412	0.7135413328287226	0.005533419666777204	0.25385981067702623	202	11599468.982778665	0.16711934351165805	11	0.15687117908411874	False	128471870								0.09158415841584157	5	1	128430444	128449721			4.476693920792079
ENSG00000066651	ENSG00000066651	Q7Z4G4-2	6_126294314_G_C		0.02478008794329501	0.00764606248607347	1.0	2.0478070717257028e-05	0.2693924904061469	0.00013841710688332627	0.2763969136997238	0.011391055804871632	0.4262116686276549	0.0003643171476208864	0.3060720529121985	202	6826115.898893874	0.1443894393829792	10	0.2319065588145532	False	126294314,126282286,126282605,126283542,126285541,126288023,126289512,126290542,126291908,126292187,126292464,126294572,126294980,126295745,126297844,126298369,126298421,126299264,126300270,126300967,126301692,126303185,126304805,126305192,126305264,126305621,126305806,126305993,126305997,126306644,126306926,126307013,126307962,126308553,126308752,126310726,126314591,126315426,126315864,126317598…		6_126336476_AT_A;6_126336229_TA_T;6_126329983_A_AC;			6_126349980_T_G;6_126340052_A_G;6_126338321_C_T;6_126336476_A_C;6_126336476_AT_A;6_126336229_TA_T;6_126335828_A_G;6_126334461_A_G;6_126334041_G_A;6_126331545_C_T;6_126329983_A_AC;6_126329304_G_A;6_126328943_A_C;6_126327934_G_A;6_126327693_C_T;6_126323631_T_A;6_126321464_G_A;6_126319881_T_A;6_126317756_A_G;6_126317598_C_T;6_126315864_G_A;6_126315426_G_A;6_126314591_A_G;6_126310726_C_T;6_126308752_…	6_126349980_T_G;6_126340052_A_G;6_126338321_C_T;6_126336476_A_C;6_126336476_AT_A;6_126336229_TA_T;6_126335828_A_G;6_126334461_A_G;6_126334041_G_A;6_126331545_C_T;6_126329983_A_AC;6_126329304_G_A;6_126328943_A_C;6_126327934_G_A;6_126327693_C_T;6_126323631_T_A;6_126321464_G_A;6_126319881_T_A;6_126317756_A_G;6_126317598_C_T;6_126315864_G_A;6_126315426_G_A;6_126314591_A_G;6_126310726_C_T;6_126308752_…		0.3663366336633663	6	1	126307576	126360422			3.80351248019802
ENSG00000066654	ENSG00000066654	Q9NXG2	16_20694067_G_A	rs7498905	1.88027980705426e-10	1.0278481445561741e-11	1.0	1.0356461750229252e-22	0.8818746831241161	1.1577130477017699e-05	0.6634536374743951	0.0005083890153856673	0.9070869646896323	9.282271062308997e-10	0.6203821846138515	202	26196969.88239286	0.1337152105048672	19	0.11532691746832273	False	20694067,20694194,20697868,20698300,20700016,20700317,20703074,20705241,20706955,20712538,20712837,20714033,20715718,20718939,20719627,20725086,20726035,20727364,20728166,20729699,20731013,20732321,20733134,20740257,20740517,20742185,20743399,20744154,20745431,20746239,20747104,20748331,20755650,20755662,20756911,20757590,20758397,20758433,20759548,20760423,20761804,20765744,20771530,20772409,207…	16_20748331_C_A;	16_20745431_CAAATA_C;16_20745431_CAAATAA_C;		16_20747104_C_T;16_20746239_G_C;16_20745431_CAAATA_C;16_20745431_CAAATAA_C;				0.12376237623762375	16	-1	20744986	20753406	0.9546789042054448	16_20794983_A_G	4.471802133663366
ENSG00000066777	ENSG00000066777	Q9Y6D6	8_67880836_T_C	rs60471868	0.08508487954559649	0.03367341422728101	1.0	0.00023745782360136105	-0.2750631283954653	0.014895039687964332	-0.1696469942153817	0.014188705803086748	-0.6922987859848798	0.0006549663298224767	-0.4231857803158921	202	50058229.57420798	0.12256316515873288	70	0.08342734590413843	False	67880836,67786633,67799084,67818082,67900761,67957130,67988196,67993594,68004680,68020835,68026481,68034555,68035003,68043800,68054031,68106922,68106934,68122913,68123065,68167536,68223017,68235165,68236061					8_68236061_A_G;8_68235165_C_T;8_68223017_G_A;8_68167536_T_C;8_68123065_G_A;8_68122913_T_G;			0.07920792079207921	8	-1	68085747	68255912	0.6637644046094737	8_68122084_T_G	4.250206574257427
ENSG00000066926	ENSG00000066926	P22830	18_55257529_C_T	rs34886602	0.0004245389764975029	7.707596307475442e-05	1.0	7.490011833361803e-08	-0.5466285297929019	3.310165909855224e-05	-0.6735606629954746	0.08870605658674514	-0.5817160111107382	0.0015498543452565161	-0.5554086385940744	202	8613889.061390467	0.1394626706056023	16	0.1493961697471736	False	55257529								0.07425742574257425	18	-1	55215515	55254004			3.068314579207921
ENSG00000067167	ENSG00000067167	G3XAN4	8_71519964_A_C	rs187470744	0.02908591829013378	0.009253836581128834	1.0	6.40285387603314e-05	0.4508438910194312	4.677187329329618e-06	0.6915927680976033	1.3132304787850797	0.11082676318216067	0.2722125235642921	-0.1412827787202502	194	2633904.838384246	0.3910074880892668	5	0.4752602110115459	False	71519964,71467425,71467435,71468392,71469241,71470404,71470649,71470935,71471345,71475154,71475849,71477742,71480283,71489189,71490446,71495308,71495847,71499109,71501945,71502332,71502575,71505220,71505663,71507012,71515255,71517318,71517424,71517490,71518549,71519415,71519477,71519614,71519906,71520915,71522264,71523477,71525157,71525880,71530953,71537387,71537450,71542471,71542600,71544197,715…		8_71495308_GAC_G;		8_71519906_C_T;8_71519614_G_A;8_71519477_T_C;8_71519415_T_A;8_71519964_A_C;	8_71519906_C_T;8_71519614_G_A;8_71519477_T_C;8_71519415_T_A;8_71518549_G_T;8_71517490_A_T;8_71517424_G_T;8_71517318_A_T;8_71515255_C_T;8_71507012_T_C;8_71505663_C_T;8_71505220_T_C;8_71502575_T_C;8_71502332_T_C;8_71501945_T_C;8_71499109_T_C;8_71495847_A_G;8_71495308_GAC_G;8_71490446_G_A;8_71489189_C_G;8_71519964_A_C;			0.10891089108910892	8	-1	71485677	71520622			5.2964340693069305
ENSG00000067208	ENSG00000067208	O60447	1_93029453_A_G	rs6656432	0.04212113483047801	0.014441391070873241	1.0	3.7187831700999935e-05	-0.21812320718082664	6.33478789824614e-06	-0.4018588020672308	0.011346961194174013	-0.5406137054768356	0.9637244011982988	0.005689665108320474	176	2001482.9774498031	0.3928359487749503	3	0.6686942777446462	True	93029453,92664966,92668474,92670126,92682284,92688438,92689936,92696189,92705224,92705638,92708973,92709689,92715207,92727610,92735012,92739699,92744651,92745759,92756507,92760807,92767292,92788769,92791812,92792858,92794758,92795104,92797814,92799151,92800232,92814471,92816148,92818005,92821374,92823598,92825559,92826100,92832179,92846681,92852504,92854663,92867933,92870846,92877017,92881607,928…		1_93028243_TTTTG_T;1_93023894_T_TCA;1_93016839_CT_C;1_92991624_GT_G;1_92982441_CA_C;1_92979681_TTA_T;		1_92977275_A_G;1_92976590_G_A;1_92976023_T_G;1_92974595_G_A;	1_93035020_C_T;1_93034221_G_A;1_93034023_G_T;1_93032583_T_C;1_93032520_T_C;1_93032467_G_A;1_93031625_T_C;1_93030735_T_C;1_93029698_T_G;1_93028243_TTTTG_T;1_93027914_G_A;1_93027862_G_A;1_93025292_G_C;1_93025288_G_A;1_93024844_C_T;1_93023894_T_TCA;1_93023150_A_C;1_93022678_C_G;1_93022283_A_G;1_93021891_T_C;1_93019313_T_C;1_93016839_CT_C;1_93016228_T_C;1_93013130_G_A;1_93012247_T_C;1_93011572_A_G;1_…		1_92979354_A_G;	0.1782178217821782	1	-1	92974253	93257961			1.84335708924313
ENSG00000067248	ENSG00000067248	A0A087WYN9	5_54548830_T_C	rs163098	0.07090429894025667	0.02703210835168161	1.0	0.0007557349116191834	-0.37716059643776695	0.0012990227384439348	-0.34940195861358675	1.7539871193405556	-0.3338857231274001	0.5003504566229011	-0.10385894858840784	202	35674825.25072123	0.09666884547426338	45	0.08836677774040612	False	54548830,54538003,54545738,54550117,54559846,54560289,54575086,54600898,54629979,54631365,54725102,54740012		5_54600897_CA_C;			5_54600898_A_G;5_54600897_CA_C;5_54575086_C_T;5_54560289_G_A;5_54559846_A_G;			0.07920792079207921	5	-1	54552073	54603550			4.068716866336635
ENSG00000067334	ENSG00000067334	Q5QJE6	1_94334891_A_G	rs12029637	1.2826578732850895e-06	1.3647852122394315e-07	1.0	4.803794083845747e-13	-0.4295333644479453	5.747755755916707e-11	-0.3760833919783556	1.912412139414676	-0.2661634819756311	0.506622548295804	-0.07837494779418552	202	31071949.383257456	0.10239758807490833	28	0.12021074871682727	True	94334891,94309777,94310694,94313296,94313349,94314712,94314834,94314923,94315666,94315977,94316323,94316410,94317443,94317603,94317927,94317940,94318152,94319263,94319953,94322347,94322388,94322494,94322796,94322849,94323073,94323129,94324423,94324843,94324883,94326934,94327211,94328893,94329072,94329712,94329920,94330372,94330375,94331313,94332403,94333546,94334954,94335032,94335194,94335643,943…		1_94339843_TA_T;1_94339178_CA_C;1_94338444_T_TA;		1_94335194_A_T;1_94335032_A_G;1_94334954_T_C;1_94333546_G_C;1_94334891_A_G;	1_94341267_A_G;1_94341137_C_T;1_94340556_G_T;1_94339975_C_T;1_94339844_A_C;1_94339843_TA_T;1_94339683_C_T;1_94339178_CA_C;1_94338444_T_TA;1_94338444_T_A;1_94337048_T_C;1_94336935_C_T;1_94335643_G_A;	1_94341267_A_G;1_94341137_C_T;1_94340556_G_T;1_94339975_C_T;1_94339844_A_C;1_94339843_TA_T;1_94339683_C_T;1_94339178_CA_C;1_94338444_T_TA;1_94338444_T_A;1_94337048_T_C;1_94336935_C_T;1_94335643_G_A;	1_94341267_A_G;	0.4975247524752475	1	-1	94333373	94345474			4.188943080547536
ENSG00000067365	ENSG00000067365	Q9BUU2	16_8790375_T_G	rs1273372	0.02345423406653356	0.007168325546964666	1.0	3.3889820735085236e-06	-0.4310267974781448	2.283305429671916e-09	-0.7776639775392689	0.05721164050767484	0.3836752861249062	0.017481386219807556	0.4099983002435153	131	184905.2147717901	0.4320464880361531	1	0.5532543872028273	False	8790375,8767878,8768801,8769633,8771449,8773685,8776753,8779372,8779797,8782236,8782396,8783598,8783971,8784761,8788410,8788758,8789723,8789924								0.12376237623762375	16	1	8715540	8740081			2.805777079207921
ENSG00000067533	ENSG00000067533	Q9Y3B9	1_218458058_T_C	rs3753592	6.914757541814644e-14	2.1044562341938518e-15	1.0	1.16806285299032e-17	0.4425305866006628	1.7037682482133746e-12	0.3212310253196044	0.07648075759507318	0.19206080555747373	0.08213319962488325	0.13594395921662586	202	10333417.729446484	0.12370357446674292	8	0.12746091093140882	False	218458058,218458551,218458557,218463643,218465466,218471383,218483973,218483974,218488503,218496066,218516310		1_218483974_C_CCCT;1_218483973_A_ACCT;			1_218496066_T_C;1_218488503_C_T;1_218483974_C_CCCT;1_218483973_A_ACCT;1_218471383_T_C;1_218465466_C_G;1_218463643_A_G;			0.4381188118811881	1	1	218458629	218511325			3.0841814636338145
ENSG00000067606	ENSG00000067606	Q05513	1_2007674_A_G	rs2803307	0.004750541704267536	0.0011516296230291545	1.0	1.502062638045585e-06	-0.38641903801332667	7.518573192732208e-06	-0.3626915331785616	0.617247678114791	-0.3760986691478347	0.9130034924929232	0.013285661725919384	202	2869813.793506238	0.31151762543511	11	0.26754906887734176	True	2007674,2005740					1_2005740_T_C;1_2007674_A_G;			0.1905940594059406	1	1	1981909	2116834			2.7946396873049517
ENSG00000068078	ENSG00000068078	P22607-2	4_1609921_T_C	rs11730734	0.09688789301475002	0.039558114343374466	1.0	0.00010445976932954554	-0.17622837503694255	0.01969150511730176	-0.1738952559682216	0.9973489563166488	0.00045979783285421405	0.8844206265340524	0.01576125338042189	149	1329748.294904572	0.3615939961440149	1	0.3820571211123609	False	1609921,1609927								0.35148514851485146	4	1	1795034	1810599			3.7219729257425747
ENSG00000068097	ENSG00000068097	Q6AI08	17_58156330_A_G	rs1078378	2.451794833150477e-14	7.03136760063054e-16	1.0	5.395805643733616e-23	1.4107096861181585	6.459608961521858e-23	1.1757697853168678	0.00010669719624603376	0.8293138727243825	0.01620489709327201	0.3515793196403263	202	4594219.791067381	0.18964863558360304	20	0.1839979139185775	False	58156330,58156427,58157149,58167485,58168222,58168984,58172447,58173772,58174749,58176504,58176651,58176790								0.08663366336633663	17	-1	58120555	58156292			3.062841846534653
ENSG00000068120	ENSG00000068120	Q13057-2	17_40719474_T_C	rs2292755	0.004354703752922964	0.0010429268264638164	1.0	3.6339306510203736e-06	-0.3504038368536192	5.326560127773605e-05	-0.31864229346150524	3.4053427323183887	-0.1443620974479014	0.36449028969245467	0.0630893908339214	202	3965301.8598668682	0.18540142609864493	10	0.27046575506786763	False	40719474,40598710,40599883,40601120,40601432,40603665,40603963,40604235,40604818,40605624,40606450,40611288,40622912,40623542,40633359,40639422,40641172,40657805,40678372,40679627,40681407,40692520,40694005,40698542,40703535,40704008,40704185,40704563,40705100,40705724,40706906,40707444,40707580,40710355,40710438,40711056,40711769,40711808,40714014,40714804,40715570,40716520,40720605,40721360,407…	17_40714804_C_A;	17_40715116_GAGAAGTGCCCGTGGAGCCCCTGGATGTCCCCTTACCCTCCACGATCAGGCCAGCTTCCCCCGTGGCCGGGTCTCCAAAGCAGCCGGTGCGTGGCTACTACCGTGGCGCTGTCGGTGGCACGTTTGACCGCCTGCACAACGCCCACAAGGTGTTGCTCAGTGTCGCGTGCATCCTGGCCCAGGAGCAGCTTGTGGTGGGAGTAGCAGACAAAGATCTGTTGAAGAGTGAGTAAGAGGGACCCTGGACTAGGGTGGAGGATCCCCAAATCTCCCCACCCCCGACCCTTATGCCGAGATCAAGGAAGGGTAGGGCCATTCATTACTTCCCACCCTTCCCAAATGTCACAGTGGTTGACACTCAATTGGTGCTAAGGCCATTTTGTCAAA…	17_40715116_GAGAAGTGCCCGTGGAGCCCCTGGATGTCCCCTTACCCTCCACGATCAGGCCAGCTTCCCCCGTGGCCGGGTCTCCAAAGCAGCCGGTGCGTGGCTACTACCGTGGCGCTGTCGGTGGCACGTTTGACCGCCTGCACAACGCCCACAAGGTGTTGCTCAGTGTCGCGTGCATCCTGGCCCAGGAGCAGCTTGTGGTGGGAGTAGCAGACAAAGATCTGTTGAAGAGTGAGTAAGAGGGACCCTGGACTAGGGTGGAGGATCCCCAAATCTCCCCACCCCCGACCCTTATGCCGAGATCAAGGAAGGGTAGGGCCATTCATTACTTCCCACCCTTCCCAAATGTCACAGTGGTTGACACTCAATTGGTGCTAAGGCCATTTTGTCAAA…	17_40715116_GAGAAGTGCCCGTGGAGCCCCTGGATGTCCCCTTACCCTCCACGATCAGGCCAGCTTCCCCCGTGGCCGGGTCTCCAAAGCAGCCGGTGCGTGGCTACTACCGTGGCGCTGTCGGTGGCACGTTTGACCGCCTGCACAACGCCCACAAGGTGTTGCTCAGTGTCGCGTGCATCCTGGCCCAGGAGCAGCTTGTGGTGGGAGTAGCAGACAAAGATCTGTTGAAGAGTGAGTAAGAGGGACCCTGGACTAGGGTGGAGGATCCCCAAATCTCCCCACCCCCGACCCTTATGCCGAGATCAAGGAAGGGTAGGGCCATTCATTACTTCCCACCCTTCCCAAATGTCACAGTGGTTGACACTCAATTGGTGCTAAGGCCATTTTGTCAAA…	17_40715116_GAGAAGTGCCCGTGGAGCCCCTGGATGTCCCCTTACCCTCCACGATCAGGCCAGCTTCCCCCGTGGCCGGGTCTCCAAAGCAGCCGGTGCGTGGCTACTACCGTGGCGCTGTCGGTGGCACGTTTGACCGCCTGCACAACGCCCACAAGGTGTTGCTCAGTGTCGCGTGCATCCTGGCCCAGGAGCAGCTTGTGGTGGGAGTAGCAGACAAAGATCTGTTGAAGAGTGAGTAAGAGGGACCCTGGACTAGGGTGGAGGATCCCCAAATCTCCCCACCCCCGACCCTTATGCCGAGATCAAGGAAGGGTAGGGCCATTCATTACTTCCCACCCTTCCCAAATGTCACAGTGGTTGACACTCAATTGGTGCTAAGGCCATTTTGTCAAA…		17_40716520_A_G;	0.38613861386138615	17	1	40713485	40718295			4.298777292079207
ENSG00000068137	ENSG00000068137	Q7Z736-3	17_40930095_A_G	rs873084	0.00023245102125657525	3.988917208968036e-05	1.0	1.5318501056414024e-07	0.7030078137422886	0.0005981217337545125	0.6326350676522874			0.6139303200597177	0.13542867785659252	99	760312.6183332695	0.31146628170612023	1	0.3940734786245824	False	40930095								0.06930693069306931	17	-1	40819932	40829048			2.471242896039604
ENSG00000068724	ENSG00000068724	Q9ULT0	2_47143230_G_T	rs6544939	0.02659371878181354	0.008327074533694395	1.0	3.526815081885472e-06	0.3832811385942879	1.3863003820706386e-13	0.7240232334120351	3.789725795306695	0.170251290710568	0.963198738829038	0.005762105494025671	201	763943.3043851521	0.193975232318593	9	0.2349171897484293	False	47143230,47143929					2_47143929_T_A;			0.1113861386138614	2	1	47143296	47303276			2.1975520058093565
ENSG00000068745	ENSG00000068745	Q9UHH9	3_48731961_A_G	rs72929172	0.007742260194336373	0.00200648063563862	1.0	7.2795796760754165e-06	0.540725137882219	1.2675180409632136e-26	1.814993630145426	0.5434579490538705	-0.3875072583968908	0.2950751341029416	-0.16740547311015266	192	584677.3680142723	0.2330580318262049	3	0.4368694198923873	False	48731961			3_48731961_A_G;	3_48731961_A_G;	3_48731961_A_G;	3_48731961_A_G;		0.07425742574257425	3	-1	48725436	48777786			4.016359060125676
ENSG00000068793	ENSG00000068793	Q7L576	15_22915961_G_A	rs78446213	8.8518167845553e-07	9.180275864586207e-08	1.0	2.707944073282638e-12	0.584014396007562	7.05722636862393e-11	0.534072186803776	0.0029523308776677483	0.40414698137647465	0.01742820964877206	0.2296540922241288	202	18389693.45947528	0.1339819175353377	31	0.12681729778887912	True	22915961,22916124,22916208,22916419,22918379,22919498,22919704,22920718,22922551,22923742,22923914,22924706,22925851		15_22922551_TTTC_T;15_22919704_AGACG_A;			15_22924706_C_T;15_22923914_T_C;15_22923742_G_C;15_22922551_TTTC_T;15_22920718_C_T;15_22919704_AGACG_A;15_22919498_G_C;15_22918379_G_C;15_22916419_C_T;15_22916208_G_A;15_22916124_G_A;15_22915961_G_A;	15_22925851_C_T;15_22924706_C_T;15_22923914_T_C;15_22923742_G_C;15_22922551_TTTC_T;15_22920718_C_T;15_22919704_AGACG_A;15_22919498_G_C;15_22918379_G_C;15_22916419_C_T;15_22916208_G_A;15_22916124_G_A;15_22915961_G_A;	15_22925851_C_T;	0.1806930693069307	15	1	22892005	23006016			3.9710259108910893
ENSG00000068878	ENSG00000068878	Q14997	2_54198295_G_T	rs2949815	3.3116027806933962e-12	1.3412320755237212e-13	1.0	2.960965192133828e-23	0.4595652816691838	7.654326479055674e-14	0.3090935278710898	0.0094896713816931	0.32125120848958844	1.670939460710149e-06	0.2613184246115172	202	25915587.09416501	0.14470537430971586	57	0.16730133781632928	False	54198295,54184545,54193888,54196238,54207548,54207622,54209028,54211184,54220049,54224688					2_54196238_G_A;2_54193888_G_A;2_54184545_T_C;	2_54196238_G_A;2_54193888_G_A;2_54184545_T_C;		0.3193069306930693	2	-1	54091204	54197977	0.6300416358809992	2_54236303_A_T	4.408488790231256
ENSG00000069248	ENSG00000069248	Q8WUM0	1_229717979_G_C	rs6678454	1.4558929764050007e-05	1.9155141115289955e-06	1.0	6.371342585517312e-10	-0.34545301459423555	5.729002124024551e-08	-0.28263674679042555	0.902493273343958	-0.2411148663171437	0.4640049422679724	-0.060161804152369935	202	70805159.17133747	0.07986362338542725	49	0.0939231540066137	True	229717979,229673934,229683264,229684588,229692975,229693846,229694557,229698931,229699015,229710455,229712340,229714955,229717856,229718001,229718135								0.2202970297029703	1	-1	229577045	229644103			4.820561157301935
ENSG00000069482	ENSG00000069482	P22466	11_68408289_T_C	rs882979	5.8609937210739206e-08	4.9807812729716334e-09	1.0	9.795629013315383e-14	0.4986882861565654	5.2040707642830626e-14	0.5346264001459099	0.00834908247671092	0.34373077954574205	4.3181977891131154e-05	0.4625068379691226	141	253777.94848178385	0.5587213217909485	2	0.4554287059876402	False	68408289								0.2351485148514852	11	1	68451247	68458643	0.4653204307975264	11_68450203_C_T	4.925719396039604
ENSG00000069849	ENSG00000069849	P54709	3_141630481_C_T	rs6774412	3.0571110948494043e-09	2.0361655308080429e-10	1.0	1.2310766860748513e-14	-0.52797563534685	4.6831997399377e-08	-0.3433292018244617	0.01085320717176898	-0.3327001743850378	0.03241325887760148	-0.19601694895845245	202	27599949.20097012	0.158670179065155	11	0.204265960774953	False	141630481,141630026,141630722,141630937,141630938,141631062,141633861,141635598,141636249,141640396,141640571,141641015,141642650,141646962,141647221		3_141640571_AAG_A;3_141633861_TAA_T;			3_141642650_T_G;3_141641015_C_G;3_141640571_AAG_A;3_141640396_G_A;3_141636249_C_T;3_141635598_C_A;3_141633861_TAA_T;3_141631062_A_G;3_141630938_C_G;3_141630937_A_G;3_141630722_A_G;3_141630026_T_C;3_141630481_C_T;	3_141642650_T_G;3_141641015_C_G;3_141640571_AAG_A;3_141640396_G_A;3_141636249_C_T;3_141635598_C_A;3_141633861_TAA_T;3_141631062_A_G;3_141630938_C_G;3_141630937_A_G;3_141630722_A_G;3_141630026_T_C;3_141630481_C_T;		0.3935643564356436	3	1	141594966	141645356			6.5544761922200125
ENSG00000069869	ENSG00000069869	P46934-4	15_56168162_T_C	rs72732282	0.0006491375605291062	0.00012225943285629543	1.0	4.4060552275590267e-07	0.3470972026643569	9.407059806993249e-06	0.3335762979510513	0.4710552825501013	0.22891610668000584	0.2729917381542024	0.09129539108366024	202	2027680.307380017	0.2451341041145593	11	0.21813934386232509	True	56168162,56121334,56122347,56124535,56125135,56125182,56125578,56125612,56126818,56126857,56133889,56135559,56135709,56140995,56145267,56154064,56161919,56174827,56180297,56181052,56186767,56194877,56196253,56209400,56210499		15_56209400_GAAC_G;		15_56121334_T_C;	15_56210499_A_G;15_56209400_GAAC_G;15_56196253_C_T;15_56194877_T_C;15_56186767_T_C;15_56181052_A_T;15_56180297_A_C;15_56174827_T_C;15_56161919_C_T;15_56154064_T_G;15_56145267_T_C;15_56140995_T_A;15_56135709_A_G;15_56135559_A_C;15_56133889_C_G;15_56126857_G_A;15_56126818_A_G;15_56125612_C_G;15_56125578_G_A;15_56125182_T_A;15_56125135_C_A;15_56124535_T_C;15_56122347_T_G;15_56168162_T_C;	15_56210499_A_G;15_56209400_GAAC_G;15_56196253_C_T;15_56194877_T_C;15_56186767_T_C;15_56181052_A_T;15_56180297_A_C;15_56174827_T_C;15_56161919_C_T;15_56154064_T_G;15_56145267_T_C;15_56140995_T_A;15_56135709_A_G;15_56135559_A_C;15_56133889_C_G;15_56126857_G_A;15_56126818_A_G;15_56125612_C_G;15_56125578_G_A;15_56125182_T_A;15_56125135_C_A;15_56124535_T_C;15_56122347_T_G;15_56121334_T_C;15_56168162_…		0.3118811881188119	15	-1	56119120	56285944			1.2086307688118811
ENSG00000069956	ENSG00000069956	Q16659	15_51998790_G_A	rs76564255	0.030755799841248068	0.009889521498760209	1.0	5.084689621126393e-05	-0.25732703837605914	5.140593394571633	-0.06746694210511266	2.043810445577739	-0.3974032046715983	0.08761551945511539	-0.20847693489779928	202	3064818.840464006	0.2193685809516052	15	0.17801724789768766	False	51998790,52005282								0.13861386138613865	15	1	52244303	52358462			5.535240851485149
ENSG00000070018	ENSG00000070018	F5H7J9	12_12067482_T_C	rs144937464	0.04560864010562805	0.01591470866848615	1.0	4.993755592597166e-05	-0.17679950205648018	0.00202856851132646	-0.1280725838668954	0.1256957221212538	-0.3653700775854958	0.5988322420763899	0.054027920107887706	194	1519787.1465744588	0.16149282494040512	13	0.2421901007304816	False	12067482								0.36386138613861385	12	-1	12268959	12419946			3.763509688118812
ENSG00000070061	ENSG00000070061	O95163	9_111782531_T_G	rs7776	4.6225891611418505e-06	5.454254798584788e-07	1.0	1.0097112315434153e-11	-0.4357918010225806	8.97567837630513e-09	-0.22243530643025647	0.2916523499646152	-0.27949038264144843	0.004768822374149958	-0.2256904116489187	202	34228651.89504907	0.10258568063002098	42	0.1320934029603652	True	111782531,111875085								0.2797029702970297	9	-1	111629797	111696396			3.8691230792079208
ENSG00000070371	ENSG00000070371	P53675	22_19165216_G_A	rs2854642	3.189546261478838e-05	4.521292897870622e-06	1.0	3.9461029937306436e-11	0.7246794745855971	7.113202276041191e-10	0.7151580824977838	4.88720123598386	0.19577388027896947	0.6876462473464698	-0.06736967676296951	202	3991668.2305957936	0.4053356712103046	11	0.4025410827093693	False	19165216,19156708,19157000,19158593,19158756,19165478,19165997,19167801,19169332,19170181,19171345,19172321,19172939,19173350,19174524,19179601,19181473,19182874,19183157,19183787,19185056,19185606,19187009,19188078,19189027,19192905,19193263,19195296,19195680,19196673,19196728,19196892,19197949,19199407,19200153,19200168,19201254,19201916,19204210,19204392,19204851,19204897,19205043,19205214,192…	22_19223352_T_C;22_19197949_G_A;22_19195680_T_C;22_19183787_A_G;	22_19263451_AAAGTTAACATTAGGTAAACACTTG_A;22_19260577_A_AG;22_19260576_CA_C;22_19260575_CCA_C;22_19256056_C_CA;22_19246937_CA_C;22_19230084_T_TG;22_19229517_G_GT;22_19222453_A_AT;22_19217306_C_CCA;22_19214071_A_AG;22_19201254_CG_C;22_19200168_G_GA;22_19200139_GAAAGAAAGAGAAAGAAA_G;22_19196673_C_CA;22_19183157_C_CT;		22_19279221_C_G;	22_19278954_C_A;22_19277809_G_T;22_19275606_C_G;22_19273370_G_C;22_19273227_A_G;22_19272806_G_A;22_19267923_A_G;22_19263906_G_A;22_19263451_AAAGTTAACATTAGGTAAACACTTG_A;22_19263083_T_C;22_19262458_T_C;22_19262039_A_G;22_19260578_C_G;22_19260577_AC_CG;22_19260577_AC_CG;22_19260577_A_AG;22_19260577_A_C;22_19260576_CA_C;22_19260575_CCA_C;22_19259784_G_A;22_19259781_T_A;22_19259526_A_G;22_19259354_T_G…	22_19212947_T_C;22_19212708_C_T;22_19212655_T_G;22_19209167_A_G;22_19174524_G_A;22_19173350_G_A;22_19172939_C_T;22_19172321_G_T;22_19171345_C_T;		0.09405940594059406	22	-1	19166986	19279239			1.6823573905940594
ENSG00000070423	ENSG00000070423	Q9BV68-2	19_684194_A_G	rs12973335	0.019151455360618963	0.005655989918628309	1.0	1.1555479787144154e-05	-0.24033917430905305	0.242651453030552	-0.1910629676134849	0.4828285858092931	-0.34829523576467203	0.5694035972599589	-0.054303912523927966	202	2308529.035606048	0.2068837095134409	7	0.234125903695933	False	684194,684755,684812,686162,686181,686234,686574,687773,687835,688379,688504,689004								0.3589108910891089	19	-1	647526	663277			4.104346044554456
ENSG00000070444	ENSG00000070444	Q99583	17_2295405_C_T	rs1545717	5.246846941119539e-05	7.873648341935208e-06	1.0	1.346635327268518e-09	-0.38353546871739735	1.3240487441431938e-07	-0.5545324367650107	0.3072261378806129	-0.26817314975311396	0.4176617002998532	-0.0950727878471411	175	415285.0814075841	0.311685288389115	2	1.1360738969416708	False	2295405					17_2295405_C_T;			0.36386138613861385	17	-1	2287354	2304412			2.090358094059406
ENSG00000070476	ENSG00000070476	Q2QGD7	3_126166911_G_C	rs800946	0.0006486131682021492	0.00012208474475817113	1.0	2.4949996562682535e-08	0.3332573272557665	3.315574506410712e-08	0.3474416281234174	0.1944745737254536	0.3655540423577213	0.14554332482322968	-0.15098861034938227	202	2438844.682878553	0.8181174017280195	8	0.4981601295430508	False	126166911,126167565,126170695,126170965,126176112,126178390,126180121,126182920,126183546,126184029,126184450,126184941,126185508,126185855,126187965,126188937,126189000,126189919,126190143,126190604,126192081,126192459,126192896,126192933,126194076,126196004,126198649,126200403				3_126180121_C_T;	3_126192933_T_A;3_126192896_G_A;3_126192459_A_G;3_126192081_C_G;3_126190604_T_A;3_126190143_A_G;3_126189919_A_G;3_126189000_C_A;3_126188937_G_A;3_126187965_G_C;3_126185855_C_T;3_126185508_A_C;3_126184941_C_T;3_126184450_T_C;3_126184029_C_T;3_126183546_G_A;3_126182920_C_T;3_126180121_C_T;3_126178390_A_C;3_126176112_G_A;3_126170965_G_A;3_126170695_T_G;3_126167565_G_C;3_126166911_G_C;	3_126192933_T_A;3_126192896_G_A;3_126192459_A_G;3_126192081_C_G;3_126190604_T_A;3_126190143_A_G;3_126189919_A_G;3_126189000_C_A;3_126188937_G_A;3_126187965_G_C;3_126185855_C_T;3_126185508_A_C;3_126184941_C_T;3_126184450_T_C;3_126184029_C_T;3_126183546_G_A;3_126182920_C_T;3_126180121_C_T;3_126178390_A_C;3_126176112_G_A;3_126170965_G_A;3_126170695_T_G;3_126167565_G_C;3_126166911_G_C;	3_126194076_T_C;	0.3217821782178218	3	-1	126156444	126194762			2.2041046597291607
ENSG00000070501	ENSG00000070501	P06746	8_42194394_A_G	rs7462320	0.0023749958903554885	0.0005220932087191394	1.0	1.4115336607830039e-07	-0.4080374838839612	6.199785689981416e-05	-0.41092572284136747	0.11775306307260662	-0.2619800340364893	0.3049121060303397	-0.08987393284422288	202	11040917.28889336	0.12443570006158315	15	0.1605758676336286	True	42194394								0.14108910891089108	8	1	42195972	42229326			3.2748126683168315
ENSG00000070540	ENSG00000070540	Q5MNZ9-2	17_66440514_T_C	rs1030098	1.9390160976724568e-10	1.07168419091663e-11	1.0	1.4164089355745518e-16	0.5298096130836919	8.671442129217227e-12	0.5069336779400049	0.005975053887068949	0.4272546154342667	0.06076805479803073	0.2323446993207172	194	1836765.6143860144	0.2504434953346403	4	0.3768775181256706	False	66440514,66433493,66434384,66435340,66442130,66452641		17_66452641_GGAAA_G;17_66434384_G_GGCAGCCCT;			17_66452641_GGAAA_G;17_66442130_G_C;17_66435340_T_G;17_66434384_G_GGCAGCCCT;17_66434384_G_T;17_66433493_C_T;17_66440514_T_C;	17_66452641_GGAAA_G;17_66442130_G_C;17_66435340_T_G;17_66434384_G_GGCAGCCCT;17_66434384_G_T;17_66433493_C_T;17_66440514_T_C;		0.3910891089108911	17	-1	66417089	66453654			2.9002183168316833
ENSG00000070610	ENSG00000070610	A0A0A0MRV1	9_35734956_C_T	rs10814274	0.00011149208872800183	1.808826348788605e-05	1.0	1.1213216604995217e-09	0.3549742717314229	0.00011863861266048496	0.2297538332077809	0.18303033752745068	0.1592014262230088	0.9800417457079468	0.15312959476091192	43	1376980.5092648515	0.3157075654322733	1	0.25506605065265925	False	35734956,35731418,35739876,35748806,35749014,35752252,35759914,35766116,35767753				9_35749014_G_A;9_35748806_G_T;	9_35739876_G_A;			0.37376237623762376	9	-1	35736863	35749983			4.386659584158417
ENSG00000070614	ENSG00000070614	P52848	5_149939422_G_A	rs35413298	0.014406257862359509	0.00407921547103449	1.0	6.675100510067422e-06	-0.1503634083934822	5.895745724380417e-06	-0.14388696088057942	0.08805783626823503	-0.4835885768383057	0.4864627581400973	-0.07917215102754728	177	827582.9405850386	0.4607444873699921	4	0.7516293438545193	False	149939422,149911219,149914401,149915676,149919739,149938387,149949806,149951873					5_149915676_C_G;5_149914401_T_C;5_149911219_A_G;		5_149919739_G_C;	0.3564356435643564	5	1	149865381	149937773			3.7579034108910894
ENSG00000070718	ENSG00000070718	P53677	8_42019613_G_A	rs12547064	1.3163906213635554e-17	2.0956236041840515e-19	1.0	1.7668637097406276e-24	-0.7743116131002971	8.126253251006284e-12	-0.5778870069259455	0.00018860207799395966	-0.5599234649680023	2.2899002055308484e-05	-0.4568373734573954	202	3404723.932041347	0.14847356316520527	10	0.14511399090310767	True	42019613,41998778,41999792,42001215,42001906,42002818,42002959,42003224,42006501,42006818,42008186,42008456,42008489,42010466,42010602,42011339,42013778,42015152,42016405,42024453,42026393,42026987,42028077,42029712,42031886,42032131,42043493,42044406,42044541,42044954,42046212,42047467,42049368		8_42015152_C_CAT;		8_42028077_G_A;8_42026987_C_T;8_42011339_A_G;8_42010602_G_A;8_42010466_A_G;	8_42028077_G_A;8_42026987_C_T;8_42026393_T_C;8_42024453_G_A;8_42016405_A_G;8_42015152_C_CAT;8_42015152_C_T;8_42013778_T_C;8_42011339_A_G;8_42019613_G_A;	8_42028077_G_A;8_42026987_C_T;8_42026393_T_C;8_42024453_G_A;8_42016405_A_G;8_42015152_C_CAT;8_42015152_C_T;8_42013778_T_C;8_42011339_A_G;8_42010602_G_A;8_42019613_G_A;		0.400990099009901	8	1	42010464	42029191	0.9897954411209752	8_42043493_G_A	2.3337907524752475
ENSG00000070759	ENSG00000070759	Q96S53-3	1_45893811_G_A	rs61788260	0.029631781399150462	0.009462191227540964	1.0	2.204913131159695e-06	0.4150048089520596	0.00011600005335392883	0.7395877296040582	0.4093404846837258	0.646121628906938	0.29955622491401396	0.34020697210816464	94	418733.2304799092	0.3952723309610042	2	0.3274094852734732	False	45893811,45956803,45962894				1_45956803_T_C;	1_45893811_G_A;			0.07425742574257425	1	-1	45809555	45956872			2.7495907663875427
ENSG00000070770	ENSG00000070770	P19784	16_58204130_T_A	rs2731749	5.9076342181312844e-08	5.027332408499876e-09	1.0	8.322899854903233e-13	0.4762640718687736	1.4849001855582412e-07	0.29300052095181484	0.8418557794220474	0.4064988626515653	0.8706442696885661	0.020947424524648817	202	28745866.54841043	0.0677067216358189	21	0.10091935528800096	True	58204130,58148584,58163959,58165382,58183435,58185794,58189977,58192985,58194326,58195632,58195998,58196965,58199203,58199670,58200973,58201759,58202089,58203006,58206443,58208782,58208832,58210887,58212143,58213567,58213970,58217740,58223079,58224132,58224290,58227044,58228083,58243088				16_58196965_T_G;16_58195998_G_T;16_58195632_G_A;16_58194326_A_G;	16_58228083_G_A;16_58227044_G_A;16_58224290_T_C;16_58224132_T_A;16_58223079_T_C;16_58217740_T_C;16_58213970_G_A;16_58213567_T_C;16_58212143_T_C;16_58210887_G_A;16_58208832_C_T;16_58206443_T_G;16_58202089_T_C;16_58201759_A_G;16_58200973_C_T;16_58199670_C_T;16_58199203_G_T;16_58196965_T_G;16_58195998_G_T;16_58195632_G_A;16_58194326_A_G;16_58192985_G_A;16_58204130_T_A;			0.14603960396039606	16	-1	58191811	58231824			4.63049547029703
ENSG00000070882	ENSG00000070882	Q9H4L5	7_25019340_C_G	rs60689900	6.191283579767205e-05	9.417713300795211e-06	1.0	2.766901920512809e-10	-0.44073642706952537	0.0003436245419625283	-0.3832910962295987	0.4708793258853266	-0.3374465631570103	0.3767252833859857	-0.08239177657838592	202	3590372.7919510887	0.15715452558785906	16	0.15359243533910272	False	25019340,24999216,25006720,25007223,25008108,25015809,25016197,25016411,25021625,25024679,25029135,25034131,25034655,25047483,25048045,25050869,25053207,25066757					7_25016411_G_A;7_25016197_A_C;7_25015809_T_C;7_25008108_C_A;7_25007223_C_A;7_25006720_C_T;7_24999216_C_A;7_25019340_C_G;			0.1485148514851485	7	-1	24836158	25021253			2.0492688366336633
ENSG00000070886	ENSG00000070886	P29322	1_22890075_A_C	rs209737	0.004845003227092185	0.0011784989706072294	1.0	8.061671436786625e-07	0.3869420055751704	2.151479700050489e-25	1.3706438337597886	0.3518513214450357	0.33264361921488605	0.9354130540351476	-0.01586256187079904	69	3605354.5612814636	0.5583257832974652	2	0.8262602492986713	False	22890075,22889875				1_22890075_A_C;				0.16831683168316833	1	1	22890057	22930087			1.1348586801027112
ENSG00000070950	ENSG00000070950	Q9NS91	3_8928604_C_T	rs124847	0.09801002026715007	0.0400851001771535	1.0	1.025133141879762e-05	0.32879293684196503	0.00022594219199270963	0.28089193479330304	2.172372496059901e-05	0.4469684267306793	0.0007293635700578891	0.27715145113199824	202	4278233.183352452	0.16878371183126334	13	0.1642400480310807	False	8928604,8907063,8909526,8918879,8922054,8926312,8926324,8927364,8928911,8931608,8931707,8932189,8932918,8932989,8933048,8933129,8933892,8933946,8934079,8934113,8936545,8938618,8939719,8939778,8941834,8942437,8942606,8943988,8947601,8948221,8949343,8949472,8949803,8949957,8950269,8950629,8951202,8951522,8951777,8952007,8952079,8952614,8953232,8953272,8954393,8954472,8954720,8955389,8955647,8955702…	3_8955389_C_T;	3_8970645_CA_C;3_8962349_TA_T;3_8961535_GGT_G;3_8959385_AC_A;3_8955647_G_GAGTCA;3_8954720_GA_G;3_8954393_GCTGA_G;3_8953272_ACATCCAGCGCAGGTGTGCTT_A;3_8949957_AT_A;3_8949956_CA_CT;3_8938613_GTAAAC_G;3_8926312_T_TA;		3_8922054_T_C;3_8918879_C_A;	3_8998937_T_C;3_8988809_C_T;3_8988200_T_A;3_8988189_T_C;3_8988048_C_T;3_8987598_A_G;3_8984464_C_A;3_8982481_G_A;3_8979779_T_G;3_8977981_G_C;3_8977163_G_A;3_8976779_G_A;3_8976115_G_A;3_8976019_A_G;3_8975742_G_A;3_8975538_C_T;3_8975393_C_T;3_8975236_G_C;3_8975200_A_G;3_8975156_T_C;3_8974924_C_T;3_8974880_A_G;3_8974644_C_G;3_8974519_T_C;3_8974093_C_T;3_8973804_T_C;3_8973717_G_A;3_8973542_T_A;3_89732…	3_8998937_T_C;3_8988809_C_T;3_8988200_T_A;3_8988189_T_C;3_8988048_C_T;3_8987598_A_G;3_8984464_C_A;3_8982481_G_A;3_8979779_T_G;3_8977981_G_C;3_8977163_G_A;3_8976779_G_A;3_8976115_G_A;3_8976019_A_G;3_8975742_G_A;3_8975538_C_T;3_8975393_C_T;3_8975236_G_C;3_8975200_A_G;3_8975156_T_C;3_8974924_C_T;3_8974880_A_G;3_8974644_C_G;3_8974519_T_C;3_8974093_C_T;3_8973804_T_C;3_8973717_G_A;3_8973542_T_A;3_89732…		0.2995049504950495	3	-1	8817088	9005457			2.633743495072378
ENSG00000071054	ENSG00000071054	A0A0D9SEY1	2_102288373_T_C	rs10496358	0.0671580597350257	0.0251714979833258	1.0	3.0996554672979855e-05	-0.28521416958559265	0.0005173256140633859	-0.19219762148893424	2.0973641146134554	-0.16099125080161206	0.6993004144487727	-0.2262680114286013	194	624299.4988796022	0.2367151455127877	3	0.3948102822835467	False	102288373								0.30445544554455445	2	1	102313312	102511149			4.413617974021899
ENSG00000071082	ENSG00000071082	P62899	2_101777940_T_C	rs56380439	0.001239283345524417	0.0002500906575774429	1.0	1.7772749415035848e-06	0.2556372102159117	6.143729850688652e-08	0.5717952748695565	0.6376232067082036	0.2225880743531743	0.8203669891499309	-0.015187018892537818	202	87390620.97931078	0.14372861631361167	9	0.1734072557192112	True	101777940,101761744,101767314								0.36386138613861385	2	1	101618177	101640494			6.4569719638350485
ENSG00000071242	ENSG00000071242	F2Z2J1	6_167047530_G_A		0.00010329736964624571	1.6601578897845648e-05	1.0	3.1106250471566536e-08	-0.4585429313425539	2.832212052593524e-05	-0.4222477332608944	0.3829612584770835	-0.5709135704009485	0.8037847932063115	-0.036929852792927716	114	1174570.4516677677	0.3794093976118026	2	0.6121173969567908	False	167047530,167027891,167028063,167028309,167028547,167028759,167029183,167030577,167030620,167031326,167031487,167032325,167032343,167032656,167032929,167033102,167033291,167033404,167034788,167036226,167036339,167036766,167037658,167039406,167039766,167040110,167040311,167040463,167040935,167041390,167045295,167045342				6_167041390_C_T;	6_167045342_C_T;6_167045295_T_C;6_167041390_C_T;6_167040935_G_A;6_167040463_A_G;6_167040311_C_T;6_167040110_T_A;6_167039766_G_A;6_167039406_G_T;6_167037658_T_C;6_167036339_G_A;6_167036226_G_C;6_167034788_G_A;6_167033404_C_A;6_167033291_T_C;6_167033102_C_T;6_167032929_A_G;6_167032656_G_A;6_167032343_C_T;6_167032325_T_C;6_167031487_G_A;6_167031326_G_A;6_167030620_G_A;6_167030577_T_C;6_167029183_C_T…		6_167040463_A_G;	0.16584158415841585	6	-1	166822852	167319939			2.318438287128713
ENSG00000072121	ENSG00000072121	Q68DK2	14_68103156_C_T	rs116144143	0.05590598621053641	0.02009683760418557	1.0	3.964389999791834e-05	-0.3062917906407566	0.016352966531152282	-0.2181916577108768	0.0023892097816474037	-1.4893309387099267	0.8387463747578984	-0.03272020213817395	202	4372721.5479210215	0.13129065022840294	31	0.17442584446658782	True	68103156,68075720,68093305,68098692,68101303,68191009								0.10396039603960396	14	-1	68194091	68283307			1.9550358960396037
ENSG00000072134	ENSG00000072134	O95208-2	17_19354741_C_A	rs9910623	0.02733801000362765	0.008604929052997161	1.0	7.292932800155966e-05	-0.3250956552468821	0.004808108130537444	-0.2448562126462251	0.759366702462193	-0.2925935691244912	0.5841688177303362	-0.0827741195727647	202	3000467.7246590517	0.15560318742320106	10	0.2247475727881676	False	19354741								0.301980198019802	17	1	19118928	19240028			2.8016282722772274
ENSG00000072778	ENSG00000072778	P49748-3	17_7222876_G_A	rs117916129	0.06898066080575012	0.0260968624282084	1.0	9.5268685930039e-05	-0.26151839337636595	0.0007752964304934053	-0.4750406803123578	0.05657250189721134	-0.307299233376519	0.04255887234050184	-0.2188676582545619	202	39908394.107841	0.13354709677665969	33	0.0834795344575099	False	7222876,7208329,7213835,7218538,7224921,7231236,7233136,7233331,7233719,7236056,7239450								0.14108910891089108	17	1	7120444	7128592			4.424257311881188
ENSG00000072818	ENSG00000072818	Q15027	17_7234299_C_G	rs3809823	1.3462555234380076e-10	7.10711975969263e-12	1.0	7.857751581028061e-20	-0.7238981916663977	1.907032657034761e-18	-0.7355193830152356	0.0003380074443040289	-0.6875979653036612	4.945592917704049e-07	-0.4629844358707407	202	1578858.7802775868	0.25517186663306857	11	0.3126063304606994	True	7234299,7226957,7234112,7234983,7235316,7240391					17_7240391_C_T;			0.2599009900990099	17	1	7239848	7254797	1.0	17_7234299_C_G	1.6550984702970295
ENSG00000072832	ENSG00000072832	E9PD68	4_5926551_A_C	rs7675169	0.001191711243809305	0.0002398125149727512	1.0	2.219794048232422e-06	-0.2959474856544879	1.3451792198545867e-06	-0.4675879113017665	0.020636995443340186	-0.43727811553277984	0.0003821532208270261	-0.2912972312928545	202	44919446.82600877	0.21046496298535505	23	0.1442461414363508	False	5926551,5921834,5922404,5922881,5924577,5924601,5924758,5924794,5924805,5926145,5926312,5926331								0.4603960396039604	4	-1	5749811	5894785			4.403570183168316
ENSG00000072840	ENSG00000072840	P57679	4_5753111_C_T	rs899693	0.003409749617218473	0.0007866810834060178	1.0	1.523743466959032e-07	-0.3959276091458794	6.472027138556777e-10	-0.6181161600607931			0.3514926438228274	0.1183560359034237	112	1683204.1734338645	0.4127896836577484	1	0.7892750817210216	False	5753111,5754259,5759103					4_5759103_C_T;4_5754259_C_A;4_5753111_C_T;			0.3589108910891089	4	1	5712924	5830772			1.5331200108910892
ENSG00000072864	ENSG00000072864	Q9NXR1-2	16_15820297_C_T	rs7185993	0.0005715772640153028	0.00010638041083744952	1.0	2.7955114861967085e-07	-0.33667921071567736	0.00036274780948246897	-0.2969681258616151	0.3954225876288947	-0.2776168303141282	0.030231961319498905	-0.20787051538416976	202	2895407.165363905	0.15184825176471226	10	0.1668763736645877	False	15820297,15806450,15806846,15827288,15827404,15827503,15829033,15831212,15837330,15846698,15850871					16_15806846_A_G;16_15806450_C_T;			0.3985148514851485	16	1	15737124	15820210			2.5041022574257426
ENSG00000072958	ENSG00000072958	Q9BXS5	19_16301100_C_T	rs17722868	6.191283579767205e-05	9.421360943108237e-06	1.0	9.317920977334773e-10	-0.6651216304208925	0.0326802290946854	-0.26880422956418537	0.05209631065875495	-0.37017894961230224	0.002942936666266041	-0.4199831263837901	202	11580773.013720792	0.1111915613625764	14	0.16946073262661393	True	16301100,16303015,16306846,16307243,16308200,16309616,16309923,16311070,16315727,16318334,16318781,16321073,16327031,16328388,16328682,16328991,16330355,16333920,16334024,16335160,16342344,16343814,16357688,16366030					19_16343814_G_A;19_16342344_G_A;19_16335160_C_T;19_16334024_G_A;19_16333920_T_C;19_16330355_C_T;19_16328991_G_A;19_16328682_C_T;19_16328388_C_T;19_16327031_C_T;19_16321073_A_G;19_16318781_C_T;19_16318334_A_G;19_16315727_C_T;19_16311070_G_A;19_16309923_A_G;			0.12871287128712872	19	1	16308389	16346160			3.3270071188118817
ENSG00000073008	ENSG00000073008	A0A0A0MSA9	19_45146629_A_G	rs2301275	5.5805862247966565e-08	4.696759330011467e-09	1.0	5.702532425519218e-15	0.6046677327849915	1.1847124247179214e-10	0.6091091706166188	0.33512360678412434	0.15257885477459301	0.20576021642514244	-0.15370031847502166	167	355990.8982350743	0.2342370764251307	5	0.2558032543796024	False	45146629,45147340				19_45147340_G_T;				0.2079207920792079	19	1	45147098	45166850			2.5262128069306935
ENSG00000073169	ENSG00000073169	A0A087X0Q9	22_50634544_G_A	rs5771093	0.0002088182051609945	3.534485832410138e-05	1.0	1.95759357647398e-10	0.4290525328060112	3.609135304818776e-07	0.3508956612243193	0.02130830768723701	0.4978726626129635	0.37286108355020586	0.08514092538940299	202	541180.7403004896	0.2272397376101909	5	0.29264586267085874	False	50634544,50622214,50624909,50635332,50635627,50639059,50644177,50644969,50645321,50645650,50647375,50649560,50651839,50652866,50654428,50654888,50658274,50658570,50662037		22_50647201_GTGTTGAAGACACCCTCATTTTGGCCGGGGGACAAAGGCTTTTACCCAGCCTCCCCGCCCTTCTCTGAGCTCCCGCTCCTGTCCGCAAACCCCATCATGTGTGCTCGGGCCCTGGGACAAACCTGAAACTCCCCTGGGCTCCGTGGTGTTGGGGGCCCTGGGCGTGCTCTCCTACTGGTATCCCTGCAGGGCCAGCTTGGGGCGGGGGTGCGGGGTGGGAGCTGGCTTGGGTGGAAGGACCATGGGCTGGGCACCTCCCACGTGGGTCGATACGTCTTGATGCCCAGGGCAGCCAGCCGGGTCCTGACTGGGGAGATGCTGAGTGCCCACCTGGGGTCTGGGTCCCCGCCCCACGGACACCACAGACGTCCCACATGGCTTGATGGC…			22_50654888_G_C;22_50654428_T_G;22_50652866_T_C;22_50651839_G_A;22_50649560_C_G;22_50647375_C_T;22_50647201_GTGTTGAAGACACCCTCATTTTGGCCGGGGGACAAAGGCTTTTACCCAGCCTCCCCGCCCTTCTCTGAGCTCCCGCTCCTGTCCGCAAACCCCATCATGTGTGCTCGGGCCCTGGGACAAACCTGAAACTCCCCTGGGCTCCGTGGTGTTGGGGGCCCTGGGCGTGCTCTCCTACTGGTATCCCTGCAGGGCCAGCTTGGGGCGGGGGTGCGGGGTGGGAGCTGGCTTGGGTGGAAGGACCATGGGCTGGGCACCTCCCACGTGGGTCGATACGTCTTGATGCCCAGGGCA…			0.3589108910891089	22	1	50639408	50656045			2.9027157128712875
ENSG00000073417	ENSG00000073417	O60658-2	15_85509089_T_G	rs35881378	0.04184712145299061	0.014318054080193324	1.0	3.105801581646915e-05	0.5217767354711113	0.025421345779771457	0.4575390788126061	0.1753925855911482	-0.3063990466227269	0.8597167749651062	-0.04096112407608932	98	455081.39198514674	0.26293373074513754	1	0.3830936586018216	False	85509089,85500752,85500823,85503112,85507192,85508360,85508773,85508796,85512239,85512706,85513645								0.099009900990099	15	1	85523671	85682376			1.0348379643564356
ENSG00000073578	ENSG00000073578	P31040	5_244620_T_C	rs62344291	1.2896438008351937e-06	1.3752376244420712e-07	1.0	1.6739261366656324e-12	0.4393866623912788	2.8238101551004166e-28	1.4602434100795518	1.4243069234833612e-27	0.4967928373983592	0.007993478944284283	0.21711264349190795	202	53017353.69690047	0.16341869399659512	26	0.13752725803680466	True	244620,202194,202545,203151,203668,205360,205565,206618,206969,209038,215841,217199,217248,218356,219138,219328,219396,220002,220433,220594,220614,220762,220817,221490,221759,221916,222057,222123,222411,222494,222932,223072,223117,223214,223411,223807,223890,223909,223958,224105,224196,224268,224418,224633,224692,224904,225267,225328,225774,225796,226160,226222,226264,226376,226753,227030,227384,…		5_253701_AC_A;5_243467_TG_T;5_239419_C_CAT;5_234677_CT_C;5_231463_TCAGGAGTTCGAGAC_T;5_229229_A_AAG;5_223909_GATTTAA_G;5_221759_T_TA;5_220762_AG_A;	5_226160_A_C;		5_256038_G_T;5_255622_T_A;5_254996_T_C;5_254035_T_C;5_253952_A_G;5_253813_G_A;5_253701_AC_A;5_252995_T_G;5_252962_A_G;5_252704_T_C;5_252328_A_G;5_251541_A_G;5_250412_G_A;5_249941_T_C;5_249783_A_G;5_249663_G_A;5_249025_A_C;5_249007_C_T;5_248866_T_C;5_248618_T_G;5_248500_G_A;5_248429_C_T;5_248356_C_T;5_248227_T_C;5_247397_C_T;5_247318_C_T;5_247275_G_A;5_246748_T_C;5_246669_T_C;5_246620_G_C;5_246560…		5_251541_A_G;5_233734_C_G;5_228362_T_C;5_226160_A_C;5_224633_A_G;	0.14108910891089108	5	1	218356	256815			3.6549951732673267
ENSG00000073584	ENSG00000073584	Q969G3-2	17_38779942_G_A	rs8066541	3.7404637479070516e-28	6.56759407920002e-31	1.0	9.57162783880559e-39	-1.055707890694251	2.305439203928525e-39	-1.0709405627667303	0.2250686045142197	-0.30703261266550763	0.7430152531210286	-0.0983751815948224	166	189433.1168975403	0.3529096246431079	1	0.6555400443529346	True	38779942,38765366,38765666,38766020,38770965,38772965,38773947,38775805,38782343,38788348,38791481,38795780,38798073,38807861,38814204,38814322,38815314,38820241,38825028				17_38798073_T_G;17_38782343_G_A;	17_38798073_T_G;17_38795780_G_A;17_38791481_T_C;17_38788348_C_T;	17_38798073_T_G;17_38795780_G_A;17_38791481_T_C;17_38788348_C_T;		0.4975247524752475	17	-1	38781214	38804760			3.1682021089108914
ENSG00000073792	ENSG00000073792	F8W930	3_185355993_C_T	rs9857968	0.04648388677759945	0.01629085298046737	1.0	0.00013899415375059936	-0.3507830791016985	0.36500578036746656	-0.3465073251557724	0.026054135177988443	-0.4622971353968701	0.004405157996971825	-0.4460858282439346	202	46421997.29548853	0.11036929511538847	22	0.13621373175245627	False	185355993,185356176,185356427,185356616,185357155,185357260,185357300,185359226,185359579,185359682,185360097,185360802								0.06435643564356436	3	-1	185361527	185542844			5.683570927079871
ENSG00000073849	ENSG00000073849	P15907	3_186612467_A_G	rs9853541	0.02355903034398064	0.007205869868760553	1.0	6.391526867460289e-06	0.2627626900442644	8.01463815027095e-05	0.31783410109271104	0.5441793627107588	0.2497794540810183	0.5653651465601536	0.058749243079922166	202	2562519.6454968047	0.2356113673092157	12	0.19512724980412666	False	186612467								0.35148514851485146	3	1	186648274	186796341			4.542613321782179
ENSG00000073910	ENSG00000073910	Q5TBA9	13_32588825_G_A	rs455805	0.05590598621053641	0.020085245655436814	1.0	3.903079878447018e-06	0.5130666532757735	1.547950492405527e-05	0.4591677949222496	0.5417420408791571	-0.20185223097674515	0.24114563733163025	0.2111601943161221	159	887930.1180026913	0.29418906591056104	1	0.4359722273075128	False	32588825,32563113,32566930,32567494,32569352,32570713,32571088,32574156,32575365,32583353,32590165,32590761								0.1113861386138614	13	1	32605437	32870794			1.0132701445544554
ENSG00000073921	ENSG00000073921	H0YEF7	11_85857232_A_T	rs56369637	0.005824347421558893	0.0014508031503075414	1.0	8.893982770645241e-07	0.7847225925300743	1.0831865640265707e-08	0.615070653462681	0.3221148316431599	0.5043304468046026	0.18590224179303447	0.3320829587592027	73	376327.03185077093	0.4758353708966431	1	0.4790172991499974	False	85857232,85614229,85643786,85674478,85681963,85704592,85729674,85734547,85736624,85749243,85781523,85786032,85791647,85792007,85792190,85794509,85795555,85796114,85797289,85797775,85809387,85826002,85828857,85831516,85851280,85851458,85852057					11_85749243_T_G;11_85736624_A_T;11_85734547_G_A;11_85729674_G_A;11_85704592_G_A;11_85681963_G_C;11_85674478_A_G;	11_85749243_T_G;11_85736624_A_T;11_85734547_G_A;11_85729674_G_A;		0.0594059405940594	11	-1	85668727	85780924			4.310693524752475
ENSG00000073969	ENSG00000073969	I3L0N3	17_44764775_A_C	rs199460	1.8086500741103844e-05	2.430446312862837e-06	1.0	1.653139023397088e-10	0.5408622620200427	4.170743217239494e-10	0.4907217388619674	0.05015120048699211	0.30232746554074336	6.676172271897911e-07	0.5377541729083855	202	41687276.065527976	0.08694780923684116	36	0.11890285729945227	False	44764775					17_44764775_A_C;			0.2277227722772277	17	1	44668035	44834830	1.0	17_44764775_A_C	3.0479506534653464
ENSG00000074219	ENSG00000074219	Q15562-4	19_49893537_A_G	rs10413687	0.04578701251630006	0.01599302883631504	1.0	9.651110216707947e-06	-0.26809976478214004	0.0004258869139524752	-0.27713229127358713	0.8247158565712037	-0.13816826026715953	0.3555525289922812	-0.08015433247323689	188	1171107.8306040026	0.2316286102188708	5	0.2778152336221204	False	49893537,49788291,49790916,49791035,49797887,49801506,49820801,49822697,49823761,49827460,49833228,49834455,49839923,49845484,49862152,49866487,49866919,49867009,49869333,49869540,49869932,49871070,49873279,49876427,49876559,49881460,49885461,49891177,49891280,49891522,49891633,49891684,49891818,49892119,49892379,49892382,49892502,49893645,49894027,49894152,49894217,49894811,49895550,49895601,498…		19_49845484_A_ACCACATCAGTT;			19_49862152_A_C;19_49845484_A_ACCACATCAGTT;			0.4777227722772277	19	-1	49843852	49865714			5.698854579207921
ENSG00000074266	ENSG00000074266	O75530	11_85922070_A_G	rs10792838	0.003251623716541423	0.0007448703749586286	1.0	1.780716027302087e-07	-0.4264140308022846	0.008018893907747446	-0.28136025520552804	1.3467259289205238	-0.22136448509766588	0.07253682385128675	-0.15970830764156174	202	10848285.417831456	0.11099704579973436	19	0.18253328098573868	True	85922070,85908313,85910309,85915028,85918022,85918167,85920508,85922292,85922442,85922580								0.4752475247524752	11	1	85955586	85989855			2.380868207920792
ENSG00000074319	ENSG00000074319	Q99816	11_18529416_A_G	rs56333121	1.6006229109826664e-08	1.2066032478904801e-09	1.0	8.068683861625265e-11	0.39233095374413024	0.0009904597249714064	0.3993685470752347	1.1018609256389027	0.29150918693784833	0.3024775568923416	0.07555856227433821	202	15529676.582302595	0.10778912620575988	15	0.1009910628180208	True	18529416,18517021,18517550,18517746,18524490,18525008,18525318,18528792,18529108,18529196,18537800,18537801,18538040,18539930,18540574,18547332,18548183,18548195,18549566,18558935,18559809,18560198,18561539,18564061,18564837,18568052,18569345,18569384,18571568,18572160,18574099,18575406,18580058,18580668,18584531,18586122,18586344,18589236,18592987		11_18529196_CA_C;11_18517550_CA_C;			11_18548195_C_G;11_18548183_T_G;11_18547332_G_A;11_18540574_T_G;11_18539930_T_C;11_18538040_T_C;11_18537801_A_G;11_18537800_C_T;11_18529196_CA_C;11_18529108_G_A;11_18528792_C_T;11_18525318_C_T;11_18525008_T_C;11_18524490_G_T;11_18517746_T_C;11_18517550_CA_C;11_18517021_A_G;11_18529416_A_G;			0.3341584158415842	11	-1	18489883	18548779			4.064932178217822
ENSG00000074370	ENSG00000074370	Q93084-4	17_3864700_C_G	rs57545477	0.003223686291370985	0.0007380932208734223	1.0	1.058837069724074e-06	-0.3620101542232014	0.001699666103262178	-0.3825769401050101	0.0015868601934500234	-0.8067703097162637	3.8098965426064357e-07	-0.5655378707567118	202	1912243.725506635	0.2500780064909772	7	0.22980490820675106	False	3864700,3867318,3867571,3867887,3868738,3868768,3868905,3868919,3869210,3869263,3869350,3870696,3870786,3871591,3872399,3872976,3873357,3873367					17_3867318_G_A;17_3864700_C_G;		17_3867571_A_G;	0.1608910891089109	17	-1	3827169	3867736	0.7309021650339024	17_3884665_G_T	2.551244866336634
ENSG00000075089	ENSG00000075089	Q9GZN1	12_100398933_C_A	rs11110181	0.0020057693146916635	0.00043012634724512786	1.0	8.526431210428219e-06	-0.5021062198245722	0.11505864445764935	-0.4387211187938767	0.2415115852804591	-0.22116277633892256	0.7971467694344941	-0.04377518324239493	202	1532272.0210990915	0.17095093567786765	11	0.3732802259971231	True	100398933,100218504,100220522,100221586,100222861,100224843,100225579,100227108,100230929,100232689,100232941,100233302,100239013,100242015,100242785,100243554,100245038,100245160,100246321,100247240,100256615,100259814,100262325,100273209,100277928,100279414,100279480,100283361,100283761,100287146,100289227,100292020,100293365,100294208,100296344,100296445,100297701,100301079,100308855,100315714…		12_100628362_TAGA_T;12_100622717_TC_T;12_100616961_CA_C;			12_100633857_A_C;12_100630132_A_G;12_100628362_TAGA_T;12_100628132_C_G;12_100627826_G_C;12_100622718_C_T;12_100622717_TC_T;12_100619305_A_C;12_100616961_CA_C;12_100616882_G_A;12_100615519_G_C;12_100614689_C_T;12_100612766_G_T;12_100603592_A_G;12_100597703_A_G;12_100595062_T_G;	12_100633857_A_C;12_100630132_A_G;12_100628362_TAGA_T;12_100628132_C_G;12_100627826_G_C;12_100622718_C_T;12_100622717_TC_T;12_100619305_A_C;12_100616961_CA_C;12_100616882_G_A;12_100615519_G_C;12_100614689_C_T;12_100612766_G_T;12_100603592_A_G;12_100597703_A_G;12_100595062_T_G;		0.09653465346534654	12	1	100592900	100635643			3.258706806930693
ENSG00000075142	ENSG00000075142	B4DHQ6	7_87839528_A_G	rs4728737	0.0015170200007192105	0.0003151949550832961	1.0	1.3113239742408822e-06	0.7907786627789226	0.17214263007684552	0.5131907707565114	0.058713992576672765	0.467195420854515	0.01520521832932242	0.3876987306167461	42	333639.9446023327	0.6625280813819245	1	0.3459376771725731	False	87839528,87828627,87831306,87843670,87843935,87855778,87879217,87884770,87893056,87899242,87915180,87928808,87932467,87939356,87940412,87943049,87943382,87948394,87951010,87952373,87953751,87953976,87954303,87955167,87956056,87956270,87958160,87959344,87959666,87964412,87967528					7_87855778_A_G;7_87843935_A_G;7_87843670_G_A;7_87839528_A_G;	7_87843935_A_G;7_87843670_G_A;7_87839528_A_G;		0.04455445544554455	7	-1	87834433	87856308			4.199810396039604
ENSG00000075234	ENSG00000075234	Q5R3I4	22_46682310_C_G	rs9615934	1.890397620398933e-09	1.2081904491839133e-10	1.0	1.951342369181129e-15	-0.9179866045764892	2.867024989416176e-14	-0.8829671694535881	3.784286714032648e-05	-0.8775625478215483	0.00016691121145220148	-0.5704825422564364	202	5782519.986958917	0.2218569425946187	14	0.2430442328992356	False	46682310,46646019,46646063,46647429,46647844,46648794,46649344,46649421,46651623,46651982,46655779,46659186,46660014,46660170,46660367,46662497,46663678,46671507,46672930,46672962,46677298,46679619,46680696,46682955,46682976,46684528,46684706,46684890,46685131,46685274,46685380,46685563,46686115,46686328,46686460,46687681,46689468,46690005,46690321,46690340,46690366,46690388,46690460,46690824,466…	22_46682976_C_T;	22_46672927_AATACATATAT_A;		22_46689468_G_A;	22_46687681_G_C;22_46686460_T_C;22_46686328_C_G;22_46686115_T_G;22_46685563_G_A;22_46685274_T_C;22_46685131_A_G;22_46684890_A_G;22_46684706_C_G;22_46684528_C_T;22_46682955_C_T;22_46680696_G_A;22_46679619_C_T;22_46677298_G_A;22_46672962_A_T;22_46672927_AATACATATAT_A;22_46671507_C_T;22_46682310_C_G;	22_46687681_G_C;22_46686460_T_C;22_46686328_C_G;22_46686115_T_G;22_46685563_G_A;22_46685380_C_T;22_46685274_T_C;22_46685131_A_G;22_46684890_A_G;22_46684706_C_G;22_46684528_C_T;22_46679619_C_T;22_46677298_G_A;22_46672962_A_T;22_46672927_AATACATATAT_A;22_46671507_C_T;	22_46685380_C_T;	0.10148514851485148	22	1	46663858	46689905	0.002866360636395468	22_46702554_T_G	3.040576306930693
ENSG00000075239	ENSG00000075239	P24752	11_108164646_A_G		0.0008215217309160162	0.00015866918600157166	1.0	6.75418832236245e-09	-0.4199811806110579	9.580357656062054e-11	-0.4589217273719631	0.0003849825511852572	-0.4004483220374268	2.78228386732787e-06	-0.4564441169707655	202	41652028.30997572	0.1265109108776279	19	0.0959276994234917	False	108164646								0.4554455445544554	11	1	107992243	108018503	1.0	11_108164646_A_G	3.135906663366337
ENSG00000075240	ENSG00000075240	Q6IC98	22_46973214_T_C	rs117095143	1.7557035338210524e-10	9.494732911451787e-12	1.0	2.3416334493197005e-16	0.5714790674409009	7.802772909511511e-14	0.5089551570114729	0.025338851047325976	0.3821225122655576	0.016018723127297112	0.19839391540277945	202	1906166.5476457104	0.2573119936090225	7	0.3427625208778867	False	46973214,46958507,46961629,46964721,46965493,46966536,46967630,46967634,46971294,46971620,46972080,46972152,46972284,46972832,46973347,46974203,46974717,46977702		22_46972284_T_TC;			22_46977702_C_T;22_46974717_G_C;22_46974203_G_A;22_46973347_C_T;22_46972832_G_C;22_46972284_T_TC;22_46972152_G_A;22_46972080_G_A;22_46973214_T_C;			0.21287128712871287	22	1	46971909	47075688			2.7440671336633664
ENSG00000075568	ENSG00000075568	Q92545	2_98377665_G_A	rs6760008	4.743867860447995e-06	5.625117807133114e-07	1.0	1.131608320150246e-11	0.3200890771312951	2.949759780213749e-13	0.28192212835054065	0.9594269726423066	0.13360243213964207	0.3084625891830555	-0.10441099901792583	202	2430358.44116588	0.2780699947265273	15	0.2384751747482039	False	98377665,98372281,98372980,98379661,98383893,98384867,98397811,98398214,98402267,98403683,98424074,98424286,98436017,98441362,98443694,98451036,98451717,98457656,98459556,98459994,98469415,98478680,98493179,98497705,98498001,98501075,98504194,98512340,98534065,98540460,98554824,98561347,98575531,98604613,98605983,98622697,98624544,98626286		2_98605983_TGAA_T;2_98504194_AT_A;2_98497705_CT_C;2_98459556_TGTAAA_T;2_98451036_TA_T;2_98379661_TCA_T;		2_98372980_A_G;	2_98605983_TGAA_T;2_98604613_C_T;2_98575531_T_C;2_98561347_C_T;2_98554824_A_C;2_98540460_G_A;2_98534065_C_T;2_98512340_C_T;2_98504194_AT_A;2_98501075_G_C;2_98498001_C_T;2_98497705_CT_C;2_98493179_C_G;2_98478680_C_G;2_98469415_A_G;2_98459994_G_A;2_98459556_TGTAAA_T;2_98457656_G_A;2_98451717_T_C;2_98451036_TA_T;2_98443694_C_T;2_98441362_A_T;2_98436017_G_A;2_98424286_G_T;2_98424074_C_A;2_98403683_C_…	2_98605983_TGAA_T;2_98604613_C_T;2_98575531_T_C;2_98561347_C_T;2_98554824_A_C;2_98540460_G_A;2_98534065_C_T;2_98512340_C_T;2_98504194_AT_A;2_98501075_G_C;2_98498001_C_T;2_98497705_CT_C;2_98493179_C_G;2_98478680_C_G;2_98469415_A_G;2_98459994_G_A;2_98459556_TGTAAA_T;2_98457656_G_A;2_98451717_T_C;2_98451036_TA_T;2_98443694_C_T;2_98441362_A_T;2_98436017_G_A;		0.32673267326732675	2	-1	98372799	98612388			2.625383035690866
ENSG00000075643	ENSG00000075643	Q96EN8	18_33783528_T_C	rs77919175	0.0006246655699037188	0.00011713850438789155	1.0	4.7419123937982e-09	0.6122492847055956	1.1676130346214814e-08	0.5928056405266964	0.12264983896991664	0.5889368013055469	0.4861675470499105	0.09923697403434373	202	1107099.5870835504	0.26468604362537185	6	0.5527673556504676	False	33783528,33791804					18_33791804_G_A;18_33783528_T_C;			0.1485148514851485	18	1	33767482	33852120			1.8559193168316832
ENSG00000075711	ENSG00000075711	Q12959-4	3_196765131_C_T	rs34152719	0.0031561009849928	0.0007211411825712214	1.0	2.3815762781104355e-07	-0.3630458585571412	7.681873105910602e-05	-0.2812605326488244	4.6766986668477456e-05	-0.5542324744685339	5.760807146706809e-09	-0.476726650994101	202	14505777.01152591	0.12682661449592614	19	0.12073691678070254	True	196765131,196765472,196767217,196767360,196767854,196769288,196769982,196772562,196773520,196773786,196773830,196774356,196774787,196776198,196776512,196776553,196777237,196779050,196808561,196813908,196814424,196831583,196841677,196842553,196844259,196860156,196874747,196896393,196896765		3_196831583_C_CA;3_196808561_TTGAAG_T;3_196776553_GT_G;3_196774355_TGAT_T;		3_196769982_C_G;	3_196896765_G_C;3_196896393_T_C;3_196874747_T_A;3_196860156_C_T;3_196844259_G_A;3_196842553_C_T;3_196841677_C_A;3_196831583_C_CA;3_196831583_C_A;3_196814424_T_C;3_196813908_G_A;3_196808561_TTGAAG_T;3_196779050_A_G;3_196777237_C_A;3_196776553_GT_G;3_196776512_A_G;3_196774787_T_C;3_196774356_G_A;3_196774355_TGAT_T;3_196773786_C_A;3_196773520_G_T;3_196772562_C_A;	3_196896765_G_C;3_196896393_T_C;3_196874747_T_A;3_196860156_C_T;3_196844259_G_A;3_196842553_C_T;3_196841677_C_A;3_196831583_C_CA;3_196831583_C_A;3_196814424_T_C;3_196813908_G_A;3_196808561_TTGAAG_T;		0.35148514851485146	3	-1	196769431	197026171	0.7682710984277369	3_196795720_T_C	3.2391614603960397
ENSG00000075914	ENSG00000075914	Q15024	3_45036539_C_T	rs112446948	1.0079773299806377e-10	5.1821764348292e-12	1.0	8.121702931295698e-16	0.9096966069687707	3.1812223253775446e-16	1.260439733629634	0.4609595973928163	0.2536065878392604	0.1385527970487276	0.2687671561000746	202	22312628.437214814	0.08871520077205734	11	0.1107529214321992	True	45036539,45040461,45040889,45048807,45053671					3_45048807_T_C;3_45040889_G_T;3_45040461_G_A;3_45036539_C_T;			0.061881188118811874	3	1	45016733	45077558			3.9628141444013343
ENSG00000075945	ENSG00000075945	Q92845	1_169730660_T_C	rs4433459	0.010029077146780656	0.0026895254293894983	1.0	8.068061082146205e-06	-0.3653723870431101			0.2439278498878098	-0.4819749395881373	0.6164807800401672	0.05417188470534162	193	1413876.7420180396	0.1708279376797136	10	0.18012390082157104	False	169730660								0.4405940594059406	1	-1	169890467	170054349			1.3181208445274541
ENSG00000075975	ENSG00000075975	C9J494	3_12674463_C_A	rs11721115	1.0536353806146977e-06	1.1050653178400669e-07	1.0	1.7173039024548911e-12	0.6869138994785493	9.80304577738138e-08	0.6079475426536961	0.00048817457087715476	0.6973683614708389	0.2602488468363904	0.1583210988646272	202	12007874.494430115	0.19073646478638293	12	0.4264455689948859	False	12674463,12578237,12580636,12580688,12581266,12585073,12587133,12589270,12593814,12606771,12614616,12615964,12622135,12688131,12691412,12693099,12696288,12700211,12709024,12720804,12724773,12732000,12739169					3_12622135_T_C;3_12615964_G_A;3_12614616_T_G;3_12606771_G_A;			0.09405940594059406	3	1	12598513	12625212			3.592203077682206
ENSG00000076043	ENSG00000076043	F5GYG5	11_114320036_G_C	rs577976	0.0008309621053100662	0.0001605897736002481	1.0	2.9481657309125647e-07	-0.19985068589169555	0.006694711935872021	-0.18447363354532206	0.02953602366146513	-0.21459818261472208	0.0110927031427733	-0.1749712988104113	202	22473207.60272397	0.1695140006897453	10	0.14069633646029356	False	114320036,114302800,114307978,114308307,114308684,114309320,114310469,114315188,114320164,114322416		11_114320164_A_AATAT;			11_114320164_A_T;11_114320164_A_AATAT;11_114315188_A_G;11_114310469_T_C;11_114320036_G_C;	11_114320164_A_T;11_114320164_A_AATAT;11_114315188_A_G;11_114310469_T_C;11_114320036_G_C;		0.4702970297029703	11	1	114310108	114321001			3.768435059405941
ENSG00000076201	ENSG00000076201	Q9H3S7	3_47560006_T_C		0.09861253481489853	0.04037769481242128	1.0	0.000539976017084937	-0.19431002962990893	0.4801147021141606	-0.09445187537431904	1.095617779562177	-0.3493971635434603	0.5332129946545163	-0.06900038625836391	202	33872995.766830325	0.0825988323018416	50	0.10622683263154804	False	47560006								0.3910891089108911	3	1	47422501	47454931			4.116660494780381
ENSG00000076242	ENSG00000076242	P40692	3_37184473_G_A	rs336601	0.003762084426639617	0.0008807408232797887	1.0	2.415548293485361e-06	-0.3464904798571464	0.4689938601593622	-0.2521830228904857	0.2730715059273352	-0.2319897658291385	0.15424920080708232	0.18287901966020792	202	22552930.4650704	0.08332366382891271	35	0.11059815419518892	True	37184473,37201611								0.2103960396039604	3	1	37034823	37107380	0.06367990176578854	3_37053568_A_G	4.077081168163296
ENSG00000076650	ENSG00000076650	Q9BRR8	19_33567337_C_G	rs34370648	4.94961269383312e-14	1.4716160882987386e-15	1.0	8.07232450424533e-20	0.9372849658811993	7.485559761974712e-18	0.8451900835878907	3.927528736283873e-05	1.0310073302824794	0.0014386940137376195	0.406577003120913	202	3904811.167583469	0.20149071294412232	14	0.5182421089391892	True	33567337,33540687,33541734,33542657,33544041,33545042,33545881,33546639,33548203,33559874,33562145,33562695,33562757,33567565,33569500,33569747,33570554,33570763,33571006,33571972,33572089,33572856,33573924,33574012,33574129,33579301,33595390,33597495,33602757,33603288,33604175,33605912,33612474,33613610,33614648,33617963,33620108,33620488,33620897,33623604		19_33603288_AC_A;19_33574012_TG_T;		19_33572089_G_C;19_33571972_G_A;	19_33620897_G_A;19_33620488_T_A;19_33620108_G_A;19_33617963_C_T;19_33613610_G_A;19_33612474_C_T;19_33605912_C_A;19_33604175_C_T;19_33603288_AC_A;19_33597495_C_G;19_33595390_A_G;19_33579301_A_C;19_33574129_G_C;19_33574012_TG_T;19_33573924_C_T;19_33572856_C_T;	19_33597495_C_G;19_33595390_A_G;19_33579301_A_C;19_33574129_G_C;19_33574012_TG_T;19_33573924_C_T;19_33572856_C_T;19_33572089_G_C;19_33571972_G_A;	19_33602757_C_T;	0.15594059405940594	19	1	33571786	33621448			2.125235707920792
ENSG00000076864	ENSG00000076864	P47736-4	1_21744493_C_G	rs112447476	0.025994233763981658	0.008096764139758307	1.0	1.2609805307527115e-05	0.2970865461316189	0.10180490989643684	0.23096633873283584	0.045596486452734036	0.5128120844077406	0.3880468465926377	0.10552489840957928	181	1228994.4479775229	0.2795409423298756	7	0.9696096594794386	False	21744493,21741843,21741857,21742047,21744967								0.2277227722772277	1	-1	21922708	21995801			1.9863118041498957
ENSG00000076924	ENSG00000076924	Q9HCS7	19_7694021_A_C	rs4134813	1.8974350631008114e-12	7.440486317906728e-14	1.0	5.653562003971731e-17	-0.4838914498557732	0.004043299885200623	-0.29370249695149603	1.7961871881833165	-0.270613185757862	0.7661640575611289	-0.021002096992624786	202	13046201.038450427	0.09443192969837944	33	0.09553773563055296	True	7694021,7694393,7695336,7695620,7695977,7696138,7696956,7697086,7697168,7697779,7697956,7698320,7698653,7698760,7698788,7698857,7699103,7699117,7699205,7699292,7699347,7699422,7699458,7699502,7699532,7699559,7699804,7701748,7702575,7703605,7704815,7705018,7708214,7709271,7710040,7710210,7710343,7710477,7710603,7710786,7711221,7712425,7713507					19_7694021_A_C;		19_7694393_G_A;	0.405940594059406	19	-1	7684411	7694451			4.1784455693069305
ENSG00000076944	ENSG00000076944	Q15833-2	19_7712425_G_C	rs34976997	0.0028812022135690273	0.0006495605130907113	1.0	1.5778393892135255e-08	-0.38256379863806667	0.001090906475585968	-0.3640914699566421	0.1236336488618753	-0.2236323476391846	0.3477887641368429	-0.07434931620625318	202	10714324.826705227	0.10424232068337036	21	0.15170595371115533	False	7712425,7694021,7694393,7695336,7695620,7695977,7696138,7696956,7697086,7697168,7697779,7697956,7698320,7698653,7698760,7698788,7698857,7699103,7699117,7699205,7699292,7699347,7699422,7699458,7699502,7699532,7699559,7699804,7701748,7702575,7703605,7704815,7705018,7708214,7709140,7709174,7709271,7710040,7710210,7710343,7710477,7710603,7710786,7711221,7713507	19_7711221_T_C;	19_7710786_TC_T;19_7710477_C_CAGG;19_7709135_AACCTCGGA_A;19_7705018_ATG_A;19_7704815_TATGTGTGTGC_T;19_7712398_GTAAGTCACCAGGACTGGGACCCTGGGGTCTGGGGCTTGGGTTCCCGGGGCCTGGGCTTGTACCTTCTAGGTGTCTGGACTCCAGAGTCCTTGGAGTCAGGGACCTGGTTTGCTGAGGGACAGGGACAGCCCCACACCAGCCGGGACCGGGAGCCTGTCAAAGACGAAGGCAGCGCCCCCCAACATCTTCCCCAAACCTCTGCCCCTGCACAGG_G;19_7712396_TGGTAAGTCACCAGGACTGGGACCCTGGGGTCTGGGGCTTGGGTTCCCGGGGCCTGGGCTT…	19_7703605_C_T;19_7712398_GTAAGTCACCAGGACTGGGACCCTGGGGTCTGGGGCTTGGGTTCCCGGGGCCTGGGCTTGTACCTTCTAGGTGTCTGGACTCCAGAGTCCTTGGAGTCAGGGACCTGGTTTGCTGAGGGACAGGGACAGCCCCACACCAGCCGGGACCGGGAGCCTGTCAAAGACGAAGGCAGCGCCCCCCAACATCTTCCCCAAACCTCTGCCCCTGCACAGG_G;19_7712396_TGGTAAGTCACCAGGACTGGGACCCTGGGGTCTGGGGCTTGGGTTCCCGGGGCCTGGGCTTGTACCTTCTAGGTGTCTGGACTCCAGAGTCCTTGGAGTCAGGGACCTGGTTTGCTGAGGGACAGGGACAGCCCCACACCAGCCG…	19_7711221_T_C;19_7712398_GTAAGTCACCAGGACTGGGACCCTGGGGTCTGGGGCTTGGGTTCCCGGGGCCTGGGCTTGTACCTTCTAGGTGTCTGGACTCCAGAGTCCTTGGAGTCAGGGACCTGGTTTGCTGAGGGACAGGGACAGCCCCACACCAGCCGGGACCGGGAGCCTGTCAAAGACGAAGGCAGCGCCCCCCAACATCTTCCCCAAACCTCTGCCCCTGCACAGG_G;19_7712396_TGGTAAGTCACCAGGACTGGGACCCTGGGGTCTGGGGCTTGGGTTCCCGGGGCCTGGGCTTGTACCTTCTAGGTGTCTGGACTCCAGAGTCCTTGGAGTCAGGGACCTGGTTTGCTGAGGGACAGGGACAGCCCCACACCAGCCG…	19_7711221_T_C;19_7710786_TC_T;19_7710603_C_G;19_7710477_C_CAGG;19_7710477_C_T;19_7710343_G_A;19_7710210_A_G;19_7710040_T_C;19_7709271_A_G;19_7709174_C_T;19_7709140_C_T;19_7709135_AACCTCGGA_A;19_7708214_G_A;19_7705018_ATG_A;19_7704815_TATGTGTGTGC_T;19_7703605_C_T;19_7702575_G_A;19_7712425_G_C;19_7712398_GTAAGTCACCAGGACTGGGACCCTGGGGTCTGGGGCTTGGGTTCCCGGGGCCTGGGCTTGTACCTTCTAGGTGTCTGGACTCCAGAGTCCTTGG…	19_7711221_T_C;19_7710786_TC_T;19_7710603_C_G;19_7710477_C_CAGG;19_7710477_C_T;19_7710343_G_A;19_7710210_A_G;19_7710040_T_C;19_7709271_A_G;19_7709174_C_T;19_7709140_C_T;19_7709135_AACCTCGGA_A;19_7708214_G_A;19_7705018_ATG_A;19_7704815_TATGTGTGTGC_T;19_7703605_C_T;19_7702575_G_A;19_7712425_G_C;19_7712398_GTAAGTCACCAGGACTGGGACCCTGGGGTCTGGGGCTTGGGTTCCCGGGGCCTGGGCTTGTACCTTCTAGGTGTCTGGACTCCAGAGTCCTTGG…	19_7711221_T_C;	0.3985148514851485	19	1	7701767	7712759			2.372873371287129
ENSG00000076984	ENSG00000076984	O14733	19_8206553_T_C	rs73922237	0.07664444954952533	0.02963350734327388	1.0	8.750439027679747e-05	0.3155076530552236	0.38284373188893134	0.11836243421506668	0.2095782211212513	0.31195500029697176	0.08614152059952536	0.14982427351968752	202	9987499.646969283	0.117502261130365	15	0.1224088238280245	False	8206553,8205952,8210055,8211519,8211754,8213231								0.28465346534653463	19	1	7968728	7979363			3.518034346534653
ENSG00000077063	ENSG00000077063	Q8WZ74	7_117562887_C_T	rs10241351	0.024946465056636842	0.007706159579124969	1.0	7.591310715614267e-05	-0.5203375649398012	0.0021068836541946008	-0.4751148475903838	1.3737490924135891	-0.5218653953284722	0.597907754865681	-0.09155767194340036	202	4668956.773720333	0.2470782509418812	18	0.4029707320235869	False	117562887								0.06683168316831684	7	-1	117350705	117514193			2.528384400990099
ENSG00000077232	ENSG00000077232	Q8IXB1	2_183466942_C_T	rs12693315	0.03966605343157218	0.01344643459415112	1.0	2.9421592988431035e-05	-0.3677000900592196	0.013217173099951587	-0.16530798358068344	0.21105951628766376	-0.4473570905604967	0.008945212620715128	-0.292173436715554	202	14746036.778449608	0.1096422608908663	25	0.10838151752501636	False	183466942,183465552,183465605,183465621,183465773,183465794,183466150,183466981,183467330,183467649,183467693,183467875,183467888,183467940,183467964,183468018,183468763,183473180,183480963,183481885,183481887,183484242,183484981,183485704,183486222,183488313								0.15346534653465346	2	1	183580999	183659191			3.2635519036719174
ENSG00000077348	ENSG00000077348	Q9NQT4	19_41691915_A_C	rs12971587	0.012862499149671252	0.0035698215479188274	1.0	1.982972926913277e-06	0.3726508321267356	2.494955176420633e-05	0.4998345103761798	0.0461678580983303	0.3466125149564632	0.15806520286647147	0.21186559324177304	202	8373767.045057404	0.12535112667423454	7	0.13145650632995362	True	41691915,41685239,41685757								0.12376237623762375	19	-1	41892279	41903384			4.360119366336633
ENSG00000077380	ENSG00000077380	Q13409-2	2_172567713_G_A	rs312919	6.7089325547760046e-18	9.973480445470591e-20	1.0	7.045651532926127e-28	-0.7314905073883963	2.9261261480974592e-27	-1.1828923380155738	1.457248496860278e-05	-0.6218051522059707	1.5026183471338474e-05	-0.2971567410243345	202	33713929.64735565	0.1440842066432406	20	0.0792630097110176	False	172567713,172530949,172532392,172533305,172534884,172535337,172535848,172537350,172541609,172542623,172542705,172543913,172544483,172549248,172549630,172552343,172552765,172558172,172559926,172560729,172563922,172564021,172567225,172569134,172569587,172573341,172574612,172575012,172575186,172577116,172577276,172579954,172582111,172585595,172585885,172586651,172588094,172588865,172588866,172588982…		2_172594315_AT_A;2_172590277_TG_T;2_172590276_TTG_T;2_172585357_GCAGGTAAACCTAAACTGGAATTTGCAATAATTTAAAATTCCTCCTTTAATCCCATTGAAACAAATTGTCTTATTTAAGTAGAAATCTGTCGTAGATCTACTTGTTATTTGTGACAGATTTTTTGTGTTCAGGCACATAAAATTAAAACTTAATACCTTTTTGTATAAAAGATAATTTTGGATTCATGATGTGTTTAGATTTTGTGGGTTGTGGTTTTGTGTGTGTGCATGTACTCACGTAAGTTAGTGATAGGCAGGAACATTCAGTAGTTACAAATACAATATGCACATGCCAATATTGACCTATAGACTTATAAATGAGATTTTCAGCTGTT…	2_172585357_GCAGGTAAACCTAAACTGGAATTTGCAATAATTTAAAATTCCTCCTTTAATCCCATTGAAACAAATTGTCTTATTTAAGTAGAAATCTGTCGTAGATCTACTTGTTATTTGTGACAGATTTTTTGTGTTCAGGCACATAAAATTAAAACTTAATACCTTTTTGTATAAAAGATAATTTTGGATTCATGATGTGTTTAGATTTTGTGGGTTGTGGTTTTGTGTGTGTGCATGTACTCACGTAAGTTAGTGATAGGCAGGAACATTCAGTAGTTACAAATACAATATGCACATGCCAATATTGACCTATAGACTTATAAATGAGATTTTCAGCTGTTTCCCCTTTTGATTTATTTGGACTTTAAGCATTAGTTCATTCTCCTGATAATT…	2_172544483_A_G;	2_172599615_T_C;2_172598592_A_G;2_172597929_G_A;2_172596308_T_C;2_172596078_G_C;2_172594315_AT_A;2_172594197_T_C;2_172591963_A_G;2_172591944_T_C;2_172590277_TG_T;2_172590276_TTG_T;2_172588982_C_T;2_172588866_C_G;2_172588865_CC_GG;2_172588865_CC_GG;2_172588865_C_G;2_172588094_G_A;2_172586651_C_G;2_172585885_T_G;2_172585357_GCAGGTAAACCTAAACTGGAATTTGCAATAATTTAAAATTCCTCCTTTAATCCCATTGAAACAAATTGTCTTATT…	2_172582111_TTTTT_TTTTTT;2_172582111_T_TG;2_172579954_A_G;2_172577276_A_T;2_172577116_T_C;2_172575186_G_A;2_172575012_T_C;2_172574612_G_A;2_172573341_G_A;2_172569587_G_C;2_172569134_AT_A;2_172567225_T_C;2_172564021_A_T;2_172563922_G_A;2_172560729_A_C;2_172559926_CAG_C;2_172558172_G_T;2_172552765_A_T;2_172549630_T_A;2_172549248_A_G;2_172544483_A_G;2_172567713_G_A;		0.25742574257425743	2	1	172543919	172604930			4.866912775740655
ENSG00000077616	ENSG00000077616	Q9Y3Q0	11_89888926_T_C	rs68127061	1.7034220046921015e-09	1.0767270075310019e-10	1.0	8.130482266609467e-13	-0.4794284426733517	2.6424062396472567e-10	-0.4462086704785571	0.06137172054702938	-0.3747076586399394	0.05218958649944426	-0.21057561669980296	144	338989.0798014844	0.35256486154218303	2	0.3230253098892168	False	89888926					11_89888926_T_C;	11_89888926_T_C;		0.3910891089108911	11	1	89864683	89926062			1.0866809871287129
ENSG00000077782	ENSG00000077782	P11362-21	8_38302965_C_T	rs6474354	0.011415127731326006	0.0031226915027635343	1.0	1.5881864165791706e-05	-0.2297728472292908	0.011599395622188358	-0.24720921505617344	5.602137236938474	-0.04044755776011838	0.4731313700632777	0.0684989113918677	202	9526330.26209948	0.23256992855341105	12	0.4901433711864436	True	38302965,38301082,38301909,38303979,38305195,38305294,38306927,38307183		8_38307183_A_ACCATTCT;8_38301909_T_TG;			8_38307183_A_ACCATTCT;8_38307183_A_T;8_38306927_C_G;8_38305294_C_T;8_38305195_T_C;8_38303979_T_A;8_38301909_T_TG;8_38301082_T_C;8_38302965_C_T;	8_38307183_A_ACCATTCT;8_38307183_A_T;8_38306927_C_G;8_38305294_C_T;8_38305195_T_C;8_38303979_T_A;8_38301909_T_TG;8_38301082_T_C;8_38302965_C_T;		0.2079207920792079	8	-1	38268656	38326352			5.799604376237624
ENSG00000077942	ENSG00000077942	P23142-4	22_45913394_G_A	rs5765441	0.004283071138947478	0.0010230632149784342	1.0	1.1886357691131477e-06	-0.5078708664424083	0.0010835086429906526	-0.40994853723602254	0.10440561649749704	-0.6961435858729002	0.023934211256147503	-0.3950775620687653	202	2187868.450748262	0.22858972741463665	8	0.2763847822186916	False	45913394,45903132,45904026,45907687,45909354,45909801,45909859					22_45909859_G_C;22_45909801_G_C;22_45909354_T_C;22_45907687_G_A;22_45904026_G_A;22_45903132_G_A;22_45913394_G_A;			0.11386138613861388	22	1	45898118	45997015			4.774044396039605
ENSG00000078070	ENSG00000078070	Q96RQ3	3_182819049_A_G	rs6443851	5.570596210478847e-08	4.675310175480899e-09	1.0	9.238809887686911e-15	0.7052837627687949	7.404432756778934e-16	0.6198595775339926	7.950991670426827e-05	0.510400698194454	7.937092186486803e-05	0.4308299787589909	202	10003901.039084148	0.15473839968854286	22	0.1102795426242864	False	182819049,182810144,182814131,182814824,182815090,182815556,182815929,182818776,182822252,182823498,182826326,182828245		3_182822252_GA_G;			3_182828245_G_T;3_182826326_C_T;3_182823498_A_G;3_182822252_GA_G;3_182818776_G_A;3_182815929_G_A;3_182815556_T_C;3_182815090_T_G;3_182814824_G_C;3_182814131_A_T;3_182810144_T_G;3_182819049_A_G;	3_182815929_G_A;3_182815556_T_C;3_182815090_T_G;3_182814824_G_C;3_182814131_A_T;3_182810144_T_G;		0.35396039603960394	3	-1	182733006	182833863	0.6509270787025635	3_182790642_C_T	2.937660621925709
ENSG00000078246	ENSG00000078246	O75386-2	12_3038859_C_T	rs9988979	0.013732628934965754	0.0038515016888889093	1.0	4.828756786937228e-06	-0.3186915043339584	6.467495070861559e-05	-0.3386551092703601	0.08340768252057751	-0.2552888651940073	0.6502120864985983	-0.04126196944833488	193	808381.4301509366	0.2237907876638368	6	0.27961797752899703	False	3038859,3000403,3001248,3001268,3001275,3001344,3001493,3001523,3001616,3001716,3001751,3001911,3001912,3001919,3002039,3002103,3002281,3002412,3002538,3002642,3003022,3003353,3003461,3003606,3003814,3003858,3003956,3003981,3004130,3004321,3004389,3004526,3004844,3005008,3005020,3005077,3005381,3005685,3005846,3006202,3006368,3006400,3006678,3006813,3007112,3008034,3008094,3008100,3008143,3008563…		12_3038220_CT_C;12_3035930_TGTG_T;12_3019445_GA_G;12_3018675_AT_A;12_3014881_T_TC;12_3009863_CT_C;12_3008034_C_CA;12_3005077_T_TATCTAAAC;12_3004844_CTCTT_C;12_3003981_ACCTGGGAGGCGGAGGTTGCG_A;12_3001616_AT_A;			12_3042403_T_G;12_3042309_G_C;12_3042201_T_C;12_3041485_G_A;12_3041075_C_T;12_3040843_T_C;12_3040839_G_A;12_3040029_C_T;12_3039878_C_A;12_3039319_A_G;12_3038917_C_T;12_3038694_T_G;12_3038585_A_G;12_3038506_A_C;12_3038220_CT_C;12_3037411_A_G;12_3036709_T_C;12_3035930_TGTG_T;12_3035667_G_A;12_3035570_C_T;12_3035050_A_G;12_3034490_C_T;12_3033444_G_A;12_3032121_G_A;12_3031832_T_C;12_3031358_T_C;12_30…	12_3042403_T_G;12_3042309_G_C;12_3042201_T_C;12_3041485_G_A;12_3041075_C_T;12_3040843_T_C;12_3040839_G_A;12_3040029_C_T;12_3039878_C_A;12_3039319_A_G;12_3038917_C_T;12_3038694_T_G;12_3038585_A_G;12_3038506_A_C;12_3038220_CT_C;12_3037411_A_G;12_3036709_T_C;12_3035930_TGTG_T;12_3035667_G_A;12_3035570_C_T;12_3035050_A_G;12_3034490_C_T;12_3033444_G_A;12_3032121_G_A;12_3031832_T_C;12_3031358_T_C;12_30…		0.4282178217821782	12	1	2986389	3050306			3.597988693069307
ENSG00000078269	ENSG00000078269	O15056	6_158438957_T_C		0.06078813604180595	0.02222185986872996	1.0	0.00012294505199363998	0.5093708268527531	0.013447088307578058	0.4435077554236887	3.6193515209308025	0.23944981132321	0.3400429365841729	0.1664880230123611	202	3605346.9375485	0.22239951615683207	14	0.276390827306254	False	158438957					6_158438957_T_C;			0.06435643564356436	6	1	158402888	158520208			1.5609670990099007
ENSG00000078295	ENSG00000078295	Q08462	5_7258672_A_G	rs35573185	0.0005976884335466823	0.00011165992507790062	1.0	6.624974756631781e-08	0.3889611510510018	1.1788533282571585e-06	0.4091209651523598	0.4062045548499352	0.4896271132817844	0.07383505206831044	0.18705935793205367	193	2376710.8687678124	0.2074289851468908	11	0.4074093025990399	True	7258672,7259853,7265144,7270417,7270814								0.2351485148514852	5	1	7396321	7830194			2.6660400594059404
ENSG00000078304	ENSG00000078304	Q13362-4	14_102174499_C_T	rs61993972	0.08579310598156945	0.0340440863019455	1.0	3.73416754002671e-05	0.3097005194363848	0.022787908796866117	0.2327890236884429	1.436596969586887	0.29399199327620984	0.2859232968328401	0.30851023598459903	44	206342.88982195887	0.24662534385787724	1	0.15709045540142827	False	102174499								0.2995049504950495	14	1	102228135	102394326			3.4175267673267324
ENSG00000078403	ENSG00000078403	P55197-1	10_21590527_C_G		0.058435450020176076	0.02120448262466883	1.0	7.818727120946773e-05	-0.3168977367519063	0.039665675834163285	-0.3016161438030735	0.1562420575120076	-0.4657228216630768	0.5957861988131066	-0.05701659182796004	202	1376190.772783284	0.16081236211656466	11	0.33676502270078984	False	21590527								0.20544554455445546	10	1	21823094	22032559			3.728810420792079
ENSG00000078674	ENSG00000078674	E7ETA6	8_17782627_C_G	rs2073570	0.00028341884672282696	4.949794209416573e-05	1.0	5.966055381137696e-09	-0.27816591642623617	3.12181225935277e-20	-0.8763756469461015	0.010981091997503838	-0.32638914375200434	0.00046973385161935594	-0.27655056169179915	202	28272207.98177596	0.11099522044900027	47	0.1352856768221757	False	17782627,17732770,17767684,17768482,17768548,17769927,17770376,17772332,17773166,17773295,17773298,17774497,17776084,17776090,17776219,17778651,17778922,17778924,17780157,17780338,17781012,17781085,17781112,17781257,17781401,17781810,17782134,17782158,17784486,17784829,17786516,17787536,17796871,17796970,17797055,17797409,17797931,17797974,17801725,17802192,17854155,17855983,17856014,17857937,178…		8_17876203_CTAGCTACT_C;8_17874677_TC_T;8_17797973_GG_G;			8_17876204_T_C;8_17876203_CTAGCTACT_C;8_17874677_TC_T;8_17874604_A_C;8_17868029_C_A;8_17857937_T_C;8_17856014_T_C;8_17855983_T_C;8_17854155_T_C;8_17802192_A_C;8_17801725_A_G;8_17797974_G_C;8_17797973_GG_G;8_17797931_T_A;8_17797409_A_G;8_17797055_A_G;8_17796970_G_T;8_17796871_A_C;8_17787536_A_G;8_17786516_G_A;8_17784829_G_A;8_17784486_C_A;8_17782158_T_G;8_17782134_C_T;8_17781810_A_C;8_17781401_A_G…			0.2920792079207921	8	1	17780349	17885478			3.9614152772277227
ENSG00000078902	ENSG00000078902	Q9H0E2	11_1360110_G_A	rs72846402	0.03724240098557785	0.012463540257259402	1.0	1.3909922575498962e-05	-0.35935936459693874	0.0863154717267045	-0.2597930938390109	0.005897997509385404	-0.2554941846341694	0.0029849489843416558	-0.3210934568518028	202	4401945.825702623	0.11106237505283363	7	0.1695482604291667	False	1360110,1245298,1275106,1293982,1296237,1296263,1312518,1312706,1318895,1366100,1373028,1375132,1376091				11_1296263_G_C;11_1296237_A_G;	11_1318895_C_T;11_1312706_C_G;11_1312518_C_T;	11_1318895_C_T;11_1312706_C_G;11_1312518_C_T;		0.19554455445544555	11	-1	1295601	1330884			2.4730964455445545
ENSG00000079134	ENSG00000079134	A0A087WWS1	18_243547_T_A	rs4622593	0.06855079634949647	0.025870041839023368	1.0	3.515143079068793e-05	-0.2283719735630193	5.031887660515342e-12	-0.3010230020390027	0.19752819928096896	-0.3315189900132731	0.1085309754004374	-0.10787604750785773	202	26857642.58065876	0.10067175129015182	30	0.14027062063915302	False	243547,157275,165503,169217,176233,186741,197741		18_243546_AT_A;			18_243547_T_A;18_243546_AT_A;	18_243547_T_A;18_243546_AT_A;		0.3712871287128713	18	-1	214520	268050			2.987702425742575
ENSG00000079150	ENSG00000079150	Q9Y680-3	2_179333450_T_C	rs7575643	9.400360023740204e-07	9.771180734029383e-08	1.0	2.523168679868301e-09	0.5221424154662906	5.643378557397376e-07	0.6280259123254274	0.005167994269805989	0.6031477257278539	0.00015228545239161158	0.5013184832978068	202	2253897.926496104	0.27978680600953776	6	0.3544141535217893	False	179333450,179284643,179284663,179285938,179286834,179288690,179289249,179289632,179290692,179290964,179295843,179297824,179303976,179306028,179308502,179310085,179311529,179312440,179312613,179313682,179314359,179319391,179321904,179324025,179327873,179333109,179336347,179336672,179339606,179341953,179342330,179344002,179349227,179357251,179358665					2_179342330_T_C;2_179341953_G_A;2_179339606_T_G;2_179336672_A_G;2_179336347_T_C;2_179333109_A_G;2_179333450_T_C;	2_179342330_T_C;2_179341953_G_A;2_179339606_T_G;2_179336672_A_G;2_179336347_T_C;2_179333109_A_G;2_179333450_T_C;		0.17574257425742573	2	-1	179328391	179343327			1.5126577347270467
ENSG00000079156	ENSG00000079156	Q9BZF3-2	2_179024166_C_T	rs76723748	0.08985502861577306	0.0360661235073728	1.0	2.6266877988076565e-05	-0.7083420104581681	0.00018541285982722868	-0.6955930723073896	1.94800310969145	-0.5043026959709371	0.26062312673453625	-0.21435057793086787	194	1578991.0299353998	0.3080597913008421	13	0.32743666869245713	False	179024166,179026118,179026871								0.07920792079207921	2	1	179059208	179264160			1.3013965126486127
ENSG00000079257	ENSG00000079257	Q9BS40	3_158366205_C_T	rs1864504	2.05695366299648e-08	1.5746783279874725e-09	1.0	5.73586521328567e-15	0.5685215719282558	7.290811994946426e-15	0.5655388652992142	0.01110942276258694	0.2680317965966021	0.002186486511206009	0.2227308826031873	202	1115597.3532677195	0.2697509258652092	3	0.2660136809067802	False	158366205,158352372,158360055,158360708,158362526,158362588,158363055,158365233,158365250,158365456,158365538,158368784,158369160,158369163,158369452,158369613,158369798,158370543,158370734,158371406,158371546,158371635,158372477,158372502,158372930,158373197,158373274,158373459,158374222,158375040,158375788,158377491,158378156,158379401,158379649,158380150,158381300,158381834,158382229,158382522…		3_158388721_C_CAAAGAAA;3_158381300_TC_T;3_158369798_A_AGT;3_158369613_AT_A;		3_158390395_A_T;	3_158389772_C_T;3_158388721_C_CAAAGAAA;3_158388394_T_G;3_158387487_T_C;3_158386737_C_T;3_158386507_A_G;3_158384920_C_T;3_158383882_T_C;3_158382522_G_A;3_158382229_T_C;3_158381834_A_G;3_158381300_TC_T;3_158380150_G_A;3_158379649_G_A;3_158379401_C_T;3_158378156_C_T;3_158377491_A_G;3_158375788_C_T;3_158375040_A_T;3_158374222_A_G;3_158373459_T_C;3_158373197_T_C;3_158372930_A_G;3_158372502_T_C;3_15837…			0.33910891089108913	3	-1	158363611	158390482			2.1443145893769366
ENSG00000079277	ENSG00000079277	Q9BUB5-2	1_47080983_G_A	rs35494693	0.01952383206406894	0.0057796759089348395	1.0	1.2784790969437634e-06	-0.3888774696589585	0.037805097188371765	-0.3028391836190668	0.6594851589271005	-0.036828145284866665	0.725405434177937	-0.025842791509858458	201	1055000.1249662302	0.1953290330015978	1	0.17716194406133468	True	47080983,47042612,47055948,47055992,47066383,47066745,47067273,47067823,47068339,47068350,47068495,47068584,47068677,47069730,47071408,47072144,47072869,47072937,47076498,47076588,47076599,47076981,47077871,47078309,47078318,47078637,47080679		1_47068339_A_ACTATTG;			1_47080679_G_A;1_47078637_T_C;1_47078318_T_C;1_47078309_C_G;1_47077871_T_C;1_47076981_G_C;1_47076599_A_C;1_47076588_C_A;1_47076498_A_G;1_47072937_C_T;1_47072869_C_T;1_47072144_A_G;1_47071408_G_C;1_47069730_A_G;1_47068677_C_T;1_47068584_C_T;1_47068495_A_G;1_47068350_A_G;1_47068339_A_ACTATTG;1_47067823_T_C;1_47067273_C_T;1_47066745_T_C;1_47066383_T_C;1_47055992_T_C;1_47055948_G_A;1_47042612_C_T;1_4…	1_47069730_A_G;1_47068677_C_T;1_47068584_C_T;1_47068495_A_G;1_47068350_A_G;1_47068339_A_ACTATTG;1_47067823_T_C;1_47067273_C_T;1_47066745_T_C;1_47066383_T_C;1_47055992_T_C;1_47055948_G_A;1_47042612_C_T;		0.457920792079208	1	-1	47023090	47082515			1.6339590650105709
ENSG00000079332	ENSG00000079332	Q9NR31	10_71910663_C_T		3.277609261143415e-06	3.771379964537021e-07	1.0	1.2726705232934856e-11	0.6211694251166536	3.950819901946759e-08	0.42284554280474745	0.21156840626145565	0.15572201509961034	0.8717781595575954	0.013255368873625885	202	43778495.30999368	0.11027114244494364	13	0.16784105171183664	False	71910663,71900246,71901476,71905695,71910630,71911014,71916461,71916826,71917017,71919027,71919188,71919271,71925446,71926620,71931646				10_71911014_C_T;10_71910630_G_A;10_71910663_C_T;	10_71926620_G_A;10_71925446_T_C;10_71919271_G_A;10_71919188_G_A;10_71919027_T_C;10_71917017_G_A;10_71916826_C_T;10_71916461_G_A;			0.3341584158415842	10	-1	71907045	71930279			4.364693405940594
ENSG00000079785	ENSG00000079785	Q92499	2_15782471_G_T	rs807624	1.4180141658195453e-06	1.5370257726195702e-07	1.0	1.9569067677303658e-11	-0.4630519694097054	1.980187097552128e-08	-0.40161279250563214	0.7256888870282849	-0.2219824780340316	0.10866645436561599	-0.1427651984343472	202	160926261.20709968	0.10521258342789568	43	0.0939668882267068	True	15782471,15733023,15788692,15792518,15793014		2_15733023_TA_T;			2_15733023_TA_T;			0.3712871287128713	2	1	15731302	15771235			5.592744102591503
ENSG00000079819	ENSG00000079819	E9PHY5	6_131504401_T_C		2.3030063653742936e-09	1.5042462271788082e-10	1.0	1.0529144905461296e-16	0.6591045082458211	1.0675457955702493e-09	0.513262930093063	6.367314452845572e-10	0.8442928710450077	4.318384007625628e-11	0.806386504443917	202	7867004.531223584	0.21908298069600526	1	0.13586558723650755	False	131504401,131505231,131507621,131511289,131517694,131520994,131522482,131524618,131530313,131533313,131533388,131534709,131536251,131538761,131539119,131539974,131543082,131549188,131552850,131554158,131555391,131559066,131565917,131567214,131584810,131586300,131586301,131590957,131592862,131597369,131604844,131604974,131609703,131610484,131612504,131615814,131616820,131617131,131617237								0.14356435643564355	6	-1	131160487	131384462	1.0	6_131504401_T_C	4.199979103960397
ENSG00000079931	ENSG00000079931	Q6UVY6	6_132531965_G_C		0.0766598242096247	0.02969300694248485	1.0	4.865497068105661e-05	-0.3478654132552447	0.0002287443833776446	-0.3119205479310559	0.5196848585871818	0.1794306428770982	0.32642767135674394	-0.17785483156988047	89	471480.5237994289	0.3235226891703175	1	0.5538226553355889	False	132531965,132534652								0.17326732673267325	6	-1	132617194	132722684			1.6168779138613862
ENSG00000079950	ENSG00000079950	O15400-2	6_132878322_C_T		0.003752814915114232	0.000878131454443796	1.0	2.0839709688779253e-07	0.4784298106749218	1.6713200529343707e-05	0.3885809971545924	1.3325703074785538	0.3147237148049173	0.2492714721909209	0.14456873488321875	202	6700555.387689499	0.16979688654562455	9	0.20600652972372133	True	132878322,132850764,132850775,132869220,132872358,132876576,132877957,132877958,132879258,132879758,132879852,132879857,132879865,132879889,132880608,132880671,132880717,132880779,132880825								0.12128712871287127	6	-1	132767006	132834337			2.1752613663366334
ENSG00000079999	ENSG00000079999	Q14145	19_10608064_C_A	rs8113472	0.004521806137096057	0.0010887691939607384	1.0	1.8643945250267707e-07	0.5675694504769592	0.00047673988667638125	0.4197573404520658	1.0121541377114722	0.5040076081661362	0.43048256160378096	0.11841469112849735	202	10031086.264025226	0.1394675072685331	27	0.17889016512487674	True	10608064,10603874,10604384,10605202,10605636,10607409,10609550,10610017,10610236,10611387,10611440,10613191,10613731,10613884,10614343,10614426,10615449,10616074,10616644,10617016,10618385,10618481,10619523,10620225,10620888,10621043,10621577		19_10614343_TTC_T;19_10611387_T_TAC;		19_10614343_TTC_T;19_10613191_A_G;	19_10613884_A_G;19_10613731_T_G;19_10613191_A_G;19_10611440_C_G;19_10611387_T_TAC;19_10610017_G_C;19_10609550_T_C;19_10607409_G_A;19_10605636_G_T;19_10605202_G_A;19_10604384_C_T;19_10603874_G_A;19_10608064_C_A;		19_10610236_A_G;	0.09158415841584157	19	-1	10596796	10614417			3.9748845049504955
ENSG00000080345	ENSG00000080345	Q5UIP0	2_152267072_T_G	rs4664045	0.02972572774014576	0.009499149798735562	1.0	3.5902455013551105e-05	0.13572991815095675	0.002858654641669816	0.282715406291584	0.21061286809339025	0.3430963968925109	0.08062959424239721	0.12369097267887952	202	88594611.5551603	0.09341257538398776	89	0.07602841088409702	False	152267072,152243511,152244361,152247421,152249800,152251363,152251931,152253918,152256182,152257255,152262179,152262317,152263544,152266311,152266473,152266731				2_152266731_T_A;2_152266473_T_C;	2_152266731_T_A;2_152266473_T_C;2_152267072_T_G;		2_152266473_T_C;	0.4900990099009901	2	1	152266397	152364527			3.7468374052855213
ENSG00000080815	ENSG00000080815	P49768	14_73546744_T_C	rs17124039	0.006094745955413251	0.0015252916835623938	1.0	2.909929395342248e-06	-0.265091672973444	0.0005954335055247887	-0.2150692388419038	1.0274422096602134	-7.942194156829173e-05	0.3398541055911413	-0.13330853853505265	176	555376.3297474933	0.3349027028801075	4	0.4549690764411506	True	73546744,73547573,73548209,73579381,73591142,73592033,73595908,73598396,73601244,73603700,73621576,73622478,73631955,73646704,73658137,73660292,73665354,73674950,73689719				14_73689719_C_T;14_73603700_G_C;	14_73674950_C_T;14_73665354_G_A;14_73660292_A_G;14_73658137_C_T;14_73646704_T_A;14_73631955_C_T;14_73622478_C_T;14_73621576_A_G;14_73603700_G_C;	14_73674950_C_T;14_73665354_G_A;14_73660292_A_G;14_73658137_C_T;14_73646704_T_A;14_73631955_C_T;14_73622478_C_T;14_73621576_A_G;		0.2277227722772277	14	1	73603126	73690399			3.1355694653465354
ENSG00000080819	ENSG00000080819	P36551	3_98298600_C_T	rs7103	0.00047722827521113633	8.736802322722897e-05	1.0	1.4307616377263988e-07	0.4066533981375552	3.7781224690611383e-07	0.29217176668150835	1.1207149421489198	0.24074316079941285	0.2244318390044184	0.11380846939453072	202	18926604.24462128	0.1063587251379964	16	0.18479577768239155	False	98298600,98298079,98299365,98300749,98301659,98301934				3_98299365_T_G;3_98298600_C_T;	3_98301934_T_C;3_98301659_C_G;3_98300749_G_C;			0.37376237623762376	3	-1	98239976	98312567			3.687227935930997
ENSG00000080822	ENSG00000080822	D6RC11	3_98054266_C_A	rs59329702	0.06608686920596303	0.024646232622052927	1.0	6.873330196684108e-05	0.5207497694635771	0.08363652428384899	0.3778607278638879	0.14376536120023622	-0.10487871688641326	0.06478784417935239	-0.2857975100111088	184	859093.9016824046	0.2323544478511657	2	0.3305099334993372	False	98054266,97911377,97924000,97932666,97936333,97936765,97936852,97939961,97940406,97941540,97944531,97944628,97945755,97950777,97953032,97954259,97954584,97955344,97956447,97962137,97962541,97970049,97970584,97973373,97978032,97978408,97978880,97983265,97985100,97988441,97991553,97993023,97993224,97997509,97998557,97999439,97999919,98000164,98000369,98001154,98001323,98003091,98004382,98005276,980…								0.08168316831683169	3	-1	98216756	98241910			3.5990152225365497
ENSG00000081154	ENSG00000081154	Q8WW12	3_101185648_G_T	rs7622461	0.06761139957885423	0.0253968139118042	1.0	0.00014910080391558045	0.29158806302738194	1.2765569405076829	0.1140973963287406	2.5315294544035294	0.13790130821256774	0.35725835553572605	-0.07319712720827898	202	38805264.80458429	0.1587097000532066	10	0.2298127435628817	False	101185648,100911771,100912137,100914314,100915603,100923856,100928781,100932146,100932353,100944076,100944224,100944932,100949331,100951174,100955591,100957798,100963884,100972858,100977907,100978795,100978985,100980311,100980849,100985697,100990263,100994377,100996014,100996572,100996670,100996845,100997814,100998732,100999839,101001759,101004180,101015897,101016568,101021647,101022876,101032284…								0.12623762376237624	3	1	101292939	101313281			6.1381421704966135
ENSG00000081181	ENSG00000081181	P78540	14_68012909_C_T	rs72721031	0.03925805755769996	0.01326676953869598	1.0	6.292678057655893e-05	-0.415312878076265	0.00037166246086280336	-0.40024273306563024	0.13358600623114958	-0.7143454805953149	0.004269738922041946	-0.30742272064133586	202	16911719.814954966	0.2050398397588888	16	0.3032724791801332	False	68012909								0.09158415841584157	14	1	68086515	68118437			4.552938163366337
ENSG00000081721	ENSG00000081721	Q9UNI6	1_161641384_G_A	rs6665610	0.024453988837341383	0.007536855040234094	1.0	7.553941953256507e-05	0.27417222720445283	0.07600797583326055	0.16884545010323554	0.003028762413387215	1.041100182466737	0.16485986379718345	0.1374805221629014	202	4394203.146736953	0.13945059833324655	13	0.18578462756554254	False	161641384								0.2004950495049505	1	1	161719548	161727028			3.5265522778338267
ENSG00000081760	ENSG00000081760	Q86V21	12_125530821_C_T	rs7397149	1.1602851964819028e-08	8.583638583361378e-10	1.0	6.385507634893043e-16	0.6558746691266866	1.0162610991901336e-12	0.5444488224310817	0.0009282040312916717	0.4294264233770608	1.7733866310427052e-06	0.4745946001639285	202	16741739.50381524	0.19109056802060784	23	0.16890920505269993	False	125530821,125519684,125520593,125521017,125524281,125524932,125525080,125532015,125534286,125534593,125538056,125540106,125545229,125549956,125552180,125552380,125554355,125555313,125555462,125556425,125559502,125560268,125562131,125562784,125564363,125564747,125567971,125568863		12_125556425_CAG_C;12_125556424_ACA_A;		12_125549956_C_T;	12_125568863_C_A;12_125564747_G_A;12_125564363_C_T;12_125562784_C_T;12_125562131_T_C;12_125560268_C_G;12_125559502_G_A;12_125556425_CAG_C;12_125556424_ACA_A;12_125555462_G_A;12_125555313_A_C;12_125554355_A_G;12_125552380_G_T;12_125552180_C_T;	12_125568863_C_A;12_125564747_G_A;12_125564363_C_T;12_125562784_C_T;12_125562131_T_C;12_125560268_C_G;12_125559502_G_A;12_125556425_CAG_C;12_125556424_ACA_A;12_125555462_G_A;12_125555313_A_C;12_125554355_A_G;12_125552380_G_T;12_125552180_C_T;	12_125562784_C_T;	0.17326732673267325	12	1	125549925	125627873	0.9317611750627202	12_125564747_G_A	2.379623108910891
ENSG00000081803	ENSG00000081803	Q86UW7-2	7_122447705_A_G	rs34959847	4.2493138871214286e-05	6.252355795518712e-06	1.0	1.0565735187115812e-09	0.5859574159411619	1.4623376528635868e-08	0.5447609580750992	0.03589532299666582	0.5308631328828537	0.0006459353497583419	0.39741554268557255	202	1903480.9941341581	0.2175840598737269	14	0.197656919653322	False	122447705,122389397,122389964,122390412,122392106,122396279,122397210,122397965,122398319,122400402,122400808,122401455,122401581,122401688,122403126,122403395,122404277,122406311,122408812,122409463,122410576,122411422,122412248,122413705,122415644,122415751,122416149,122416179,122416361,122418337,122418733,122418741,122420535,122420946,122422418,122423581,122426165,122426782,122426905,122427713…		7_122504524_ACT_A;7_122490415_TA_T;7_122487651_AT_A;7_122485744_C_CG;7_122459672_AACTTAG_A;7_122456303_ATTTTTTAGAT_A;7_122455672_CA_C;7_122448294_GTGTGTTGT_G;7_122437735_C_CAT;7_122427730_AG_A;7_122422418_A_AAAC;7_122420946_G_GACC;7_122413705_CT_C;7_122401455_T_TTCA;7_122397210_T_TTTTA;7_122396279_A_AA;7_122392106_CCAAGAAAACT_C;			7_122513089_G_A;7_122511869_C_G;7_122511041_A_G;7_122509701_G_A;7_122508169_G_C;7_122504524_ACT_A;7_122503676_A_C;7_122502787_A_T;7_122502122_A_C;7_122497783_G_A;7_122494140_G_A;7_122493313_G_A;7_122492340_T_C;7_122491569_C_T;7_122490416_A_G;7_122490415_TA_T;7_122487651_AT_A;7_122485858_A_C;7_122485744_C_T;7_122485744_C_CG;7_122485297_T_G;7_122484148_G_A;7_122482495_C_T;7_122482195_C_T;7_12248112…			0.17326732673267325	7	-1	121958481	122526813			2.7808681237623762
ENSG00000082212	ENSG00000082212	P23368	18_48387956_G_A	rs674351	1.3132695573945982e-17	2.0752825734317072e-19	1.0	4.5710964265542886e-27	-0.6610253821304598	1.4611951494473946e-11	-0.4726996545403512	0.3607567057331029	-0.2399229193667105	0.013016595167097932	-0.1973561497723504	202	39291351.16172765	0.09593017790963376	25	0.10771387160435483	False	48387956,48384463,48385849,48386489,48391347,48391491,48392104,48392550,48397197,48397727,48397801,48398867,48399870,48401123,48403967,48404066,48405479,48405481,48405489,48405846,48408285,48408399,48410007,48411328,48412616,48413319,48414331,48414404,48415255,48416948,48420937,48421023,48422985,48424454,48424991,48425038,48425239,48429496,48429604,48429825,48430067,48433583,48434110,48435326,484…		18_48468052_G_GT;18_48435326_CT_C;18_48420937_CA_C;18_48415254_TA_T;		18_48473753_G_A;18_48405489_T_A;18_48405481_C_G;18_48405479_C_T;	18_48468355_C_T;18_48468052_G_T;18_48468052_G_GT;18_48467776_A_G;18_48465028_T_A;18_48462210_G_A;18_48457973_A_G;18_48457313_C_G;18_48456903_T_C;18_48454796_T_G;18_48446953_C_T;18_48446595_G_T;18_48445803_T_C;18_48445268_G_A;18_48445249_A_G;18_48435326_CT_C;18_48434110_G_A;18_48433583_A_G;18_48430067_T_C;18_48429825_G_A;18_48429604_T_A;18_48429496_A_G;18_48425239_C_T;18_48425038_G_A;18_48424991_T…			0.3787128712871287	18	1	48405419	48474691			5.006113900990099
ENSG00000082213	ENSG00000082213	Q49AR2	5_31532638_G_C	rs6877842	9.192529247808396e-05	1.4666296809976404e-05	1.0	8.672132467533921e-08	0.5964910756128994	7.269872383774276e-05	0.2787399913707149	0.013057575447794921	0.3313073087443321	0.0023750770081433057	0.2116168758922861	202	4138056.5112593537	0.17045812823748835	11	0.12579388937697356	False	31532638,31520141,31524477,31532174,31532878,31533691					5_31533691_G_A;5_31532878_C_A;5_31532638_G_C;	5_31533691_G_A;5_31532878_C_A;5_31532638_G_C;		0.15841584158415842	5	1	31532373	31555165			3.7749922425742577
ENSG00000083097	ENSG00000083097	Q5JWR5	6_83838673_G_A		0.00013497514394291302	2.21035030289284e-05	1.0	3.3846180009519145e-09	-0.4965678584797202	0.0004770950095036587	-0.3013916319906184	0.6420524551786804	-0.4248397803409216	0.07478009303932692	0.24275592015572645	200	919421.2431520177	0.35259403873444994	8	0.5278503985868364	False	83838673,83761152,83773049,83777413,83778354,83779921,83788011,83800898,83801144,83808086,83818219,83824637,83824703,83831126,83843781,83850809,83869103,83908554	6_83838673_G_A;	6_83801144_TCAAA_T;		6_83777413_C_T;	6_83869103_C_G;6_83850809_A_T;6_83843781_T_C;6_83831126_G_A;6_83824703_C_T;6_83824637_A_C;6_83818219_A_C;6_83808086_C_T;6_83801144_TCAAA_T;6_83800898_G_A;6_83788011_G_A;6_83779921_C_T;6_83778354_A_G;			0.13861386138613865	6	1	83777385	83881069			1.9050745396039606
ENSG00000083223	ENSG00000083223	Q5VYS8	9_88979674_T_C	rs7847085	0.02000455242862097	0.005945400751055678	1.0	1.982028215382818e-05	-0.2308788159013945	0.18649885863988488	-0.1270398407953236	0.1892260597353176	-0.4266409406701413	0.1866711590267852	-0.2008394490766574	202	8585066.958953401	0.12493979027574788	32	0.1192582299630663	False	88979674								0.4257425742574257	9	-1	88902648	88969369			2.585275564356436
ENSG00000083444	ENSG00000083444	Q02809-2	1_11990284_T_C	rs72640291	3.348531928290268e-06	3.8608263483154797e-07	1.0	3.81851794913164e-10	-0.8272240998357002	2.571490483312583e-14	-0.7514019294059445	0.18514599577130827	-0.51173703563861	0.022448884807419682	-0.3797655750954827	202	22317658.051312115	0.14506469867798466	31	0.09560007651109677	False	11990284,11943792,11959085,11960394,11961739,11962135,11965100,11976032,11976421,11979107,11981606,11981659,11982580,11983831,11987702,11996041,11997093,11997518,11998178,11999196,11999971,12000670,12001682,12003036,12005250,12008656,12008658,12008736,12008897,12009024,12011977,12012409,12013066,12013200,12013215,12013573,12015492,12016422,12016957,12032395		1_12015492_TTTACAAAAGG_T;1_12011977_AAAAT_A;			1_12032395_G_A;1_12016957_T_G;1_12016422_T_C;1_12015492_TTTACAAAAGG_T;1_12013573_G_A;1_12013215_C_T;1_12013200_C_T;1_12013066_G_A;1_12012409_A_G;1_12011977_AAAAT_A;1_12009024_A_G;1_12008897_G_C;1_12008736_G_A;1_12008658_G_A;1_12008656_A_G;1_12005250_G_A;1_12003036_G_T;1_12001682_G_A;1_12000670_T_C;1_11999971_T_C;1_11999196_C_T;1_11998178_T_G;1_11997518_G_A;1_11997093_C_T;1_11996041_A_G;			0.04950495049504952	1	1	11994262	12035595			4.09974333474441
ENSG00000083535	ENSG00000083535	Q8WXW3	13_73314713_G_C	rs67241368	7.585250477571411e-08	6.588149191569692e-09	1.0	2.879370689045437e-12	0.400062344701099	8.278734148071584e-09	0.3614628017688191	0.007780918664759675	0.3845152272486907	0.0007001354862624107	0.2523262875477157	202	4183598.909961669	0.13709603371490012	15	0.16637635481404578	False	73314713,73313825,73313960,73315266,73320455,73322235,73324751,73326915								0.4678217821782178	13	1	73356197	73590591			2.5329278267326734
ENSG00000083635	ENSG00000083635	Q9UHK0	13_45593218_A_T	rs9567517	0.03733819632752757	0.012504340359716305	1.0	0.00014783278164607006	0.2754367598972346	0.004795689843126027	0.2117147133145552	0.030942100206571937	0.6094453653963504	0.3784801696486759	0.07423355785883616	202	4934016.114749592	0.146162888655298	11	0.2603630732433195	False	45593218								0.2797029702970297	13	-1	45513384	45563618			3.638766673267327
ENSG00000083828	ENSG00000083828	Q9NXT0-3	19_58241227_G_A	rs9749143	1.2998298640585072e-10	6.831600245373633e-12	1.0	6.383155164232002e-15	0.6840955843677065	6.404382354731491e-06	0.4765690486614386	0.17232126798864206	-0.3168524084987148	0.17272693879615453	-0.33109679174181306	46	862673.7813877787	0.5082500379679198	1	0.931231354547495	False	58241227								0.21782178217821785	19	1	58281023	58331307			2.276753658415841
ENSG00000083844	ENSG00000083844	O43296	19_57748576_A_G	rs6510051	0.006815273010576014	0.0017391086274555064	1.0	4.814565782430818e-06	0.2086475990709213	3.8550838653246345e-05	0.17285849908282586	0.011327810809161828	0.3561313691118402	0.5846619581860784	0.07537554307048477	130	449700.4071066722	0.533528727469524	1	0.5795683756880662	False	57748576,57716530,57717532,57720137,57725115,57728136,57729178,57731443,57733506,57733618,57734848,57735301,57735816,57737664,57737793,57740608,57741071,57741835,57742037,57748905,57748911,57749227,57749429,57751274,57752670,57753071		19_57716530_AATAC_A;			19_57720137_T_C;19_57717532_G_T;19_57716530_AATAC_A;			0.2920792079207921	19	1	57702868	57724724			2.2141527079207917
ENSG00000083857	ENSG00000083857	A0A087WVP1	4_187590467_C_T	rs327077	0.08896998598328465	0.03559632589147453	1.0	1.553971729732325e-05	-0.19299220299886247	0.0051074409531303286	-0.3116735808795042	0.007005180787033175	-0.6521699173327979	0.00619551227181886	-0.3199792226102951	202	5749568.509907536	0.19407667301860806	30	0.17768879377166755	False	187590467,187589603,187593057,187593566,187595058,187596660,187597432,187598456,187600758,187601590,187602279,187604655,187606984		4_187597432_GA_G;			4_187606984_G_T;4_187604655_C_G;4_187602279_T_C;4_187601590_A_G;4_187598456_T_C;4_187597432_GA_G;4_187596660_T_G;4_187595058_C_G;4_187593566_T_C;4_187593057_T_A;4_187589603_T_C;4_187590467_C_T;			0.15594059405940594	4	-1	187508937	187647876			4.425467331683168
ENSG00000083937	ENSG00000083937	Q9UQN3	3_87263497_C_T	rs17024046	2.1393118160601582e-08	1.6452392170800936e-09	1.0	8.451113652856821e-13	0.4227052600745897	1.4803531967220957e-06	0.26135705799589176	0.0004824356124191631	0.2988593824640437	1.4116389083095725e-05	0.3245473866803472	202	14223274.710557813	0.1253914462685502	5	0.1376326369180795	True	87263497,87245505								0.3292079207920792	3	1	87276421	87304698	0.7141204833677779	3_87304561_G_A	4.751232425403398
ENSG00000084090	ENSG00000084090	Q9NQZ5	2_96822981_T_C	rs1168969	6.162811523143348e-12	2.6114219494064045e-13	1.0	2.0247974907762203e-16	-0.4290984963720201	3.1918774020807694e-14	-0.3068278457660108	1.205329048131492	-0.16578761290176525	0.3248331458197555	-0.08329925683318024	202	2974594.280643321	0.1729841626698801	7	0.1781312978519647	False	96822981,96847036,96851119,96960471		2_96851114_GAAAAC_G;2_96851114_GAAAACA_G;		2_96851119_C_A;2_96851114_GAAAAC_G;2_96851114_GAAAACA_G;				0.30445544554455445	2	-1	96850597	96874563			5.787280505090536
ENSG00000084207	ENSG00000084207	P09211	11_67390846_A_G	rs28782005	0.012776194429250926	0.003541382232057379	1.0	1.3845616577284415e-06	0.41421690315480697	2.3420117327558648e-05	0.4791613592673615	0.0009607674586632145	0.4758302587142635	1.8286931568813518e-05	0.4306727133861967	202	308172447.97724104	0.18730820466403325	15	0.2636786181502144	False	67390846,67363340,67373669,67385659,67385996,67386744,67388110,67388131,67388615,67389043,67389134,67389216,67389550,67391361,67391988,67392081,67392644,67393166,67396219,67397251,67397675,67397732,67398730,67398881,67399914,67400235,67400622,67400846,67400916,67402744,67402907,67402937								0.10148514851485148	11	1	67351066	67354131	1.0	11_67390846_A_G	8.199681920792079
ENSG00000084676	ENSG00000084676	Q15788-3	2_24947050_G_T	rs11682130	1.681271309993364e-05	2.2395958688662627e-06	1.0	7.191431503107263e-10	-0.3029594201846574	0.0007250560026926697	-0.2498122521662671	3.1220887782505216	-0.1092804820343804	0.6117021973879542	0.04813623151535973	193	930870.385110463	0.1916931682350136	9	0.2804467726127536	True	24947050,24715318,24735507,24739387,24756965,24758475,24766411,24781809,24804182,24818051,24826055,24830452,24854607,24854793,24861275,24871871,24885833,24892873,24912411,24919659,24928497,24928674,24936786,24939120,25030141,25054261		2_24939120_TA_T;2_24826055_AT_A;2_24756965_TATTA_T;			2_24939120_TA_T;2_24936786_G_A;2_24928674_A_G;2_24928497_A_G;2_24919659_T_A;2_24912411_G_A;2_24892873_G_T;2_24871871_C_G;2_24861275_A_G;2_24854793_C_T;2_24854607_T_A;2_24830452_C_T;2_24826055_AT_A;2_24818051_T_C;2_24804182_A_C;2_24781809_A_G;2_24766411_A_G;2_24758475_T_C;2_24756965_TATTA_T;2_24739387_G_A;2_24735507_A_T;2_24715318_T_C;2_24947050_G_T;			0.38613861386138615	2	1	24714783	24993571			2.5372010328220154
ENSG00000084710	ENSG00000084710	Q9Y2G0	2_25328703_C_T	rs12233132	0.0969567670877126	0.03960893329464088	1.0	5.424494771968916e-05	0.2062924304104536	0.001464951221423272	0.1694921121139951	0.5018670393852314	0.20068150326988965	0.8185826296550693	0.03193306122938488	141	403552.3086507599	0.2638073761500113	2	0.3108552998248432	False	25328703,25323083,25324708,25325444,25329016,25329272,25330678,25332041,25336277,25338053,25339405,25339658,25341001		2_25339405_AT_A;2_25332041_CA_C;2_25330678_CT_C;2_25324708_AAAG_A;2_25324707_TAA_T;			2_25341001_G_A;2_25339658_G_A;2_25339405_AT_A;2_25338053_G_A;2_25336277_G_A;2_25332041_CA_C;2_25330678_CT_C;2_25329272_C_T;2_25329016_C_T;2_25325444_C_T;2_25324708_AAAG_A;2_25324707_TAA_T;2_25323083_A_T;2_25328703_C_T;			0.27722772277227725	2	1	25264999	25378243			1.3921874703606176
ENSG00000084731	ENSG00000084731	O14782	2_26109402_A_T	rs2176182	7.65464002545936e-05	1.1997615584794667e-05	1.0	5.5968352197415694e-08	-0.25353238287982616	1.2495033383935942e-05	-0.20519024889987025	0.3074069297478175	-0.28353374678707977	0.10499694474620146	-0.17436838471898342	193	1244871.5367147753	0.2830659910534324	9	0.4496132212622811	False	26109402,26118096,26122806,26127487,26131778,26135996,26150589,26150773,26151643				2_26151643_A_T;2_26150773_T_G;2_26150589_G_T;		2_26151643_A_T;2_26150773_T_G;2_26150589_G_T;		0.2698019801980198	2	-1	26149471	26205618			3.9350843897347123
ENSG00000084764	ENSG00000084764	Q9UPY8	2_27243364_A_G	rs7606840	0.003717467083340261	0.0008672494319439469	1.0	1.947525947414543e-07	-0.3736723851559842	3.1807746731081212e-06	-0.3985699916793589	0.016016929344202818	-0.33281392180386504	1.1411746084576206e-05	-0.41967192177091306	193	816228.6859503464	0.2396754758684971	5	0.32424763437533843	False	27243364,27157396,27158623,27159341,27159786,27161060,27161591,27163044,27166822,27167320,27167784,27168411,27168743,27169490,27169540,27169637,27169842,27170470,27170982,27171245,27172069,27173249,27173341,27173520,27174348,27175570,27177545,27177903,27177952,27178129,27178965,27178972,27179371,27179492,27179963,27181112,27181454,27182155,27182160,27183751,27183793,27183970,27184446,27185317,271…		2_27241795_A_ATTA;2_27227706_CA_C;		2_27249245_A_C;	2_27247832_T_C;2_27245475_T_C;2_27244712_C_T;2_27241795_A_T;2_27241795_A_ATTA;2_27239949_G_T;2_27237614_A_G;2_27233859_T_C;2_27233789_T_C;2_27233467_T_C;2_27231145_G_A;2_27229892_C_A;2_27229891_TC_AA;2_27229891_T_A;2_27229891_TC_AA;2_27229372_C_G;2_27229079_A_C;2_27227707_A_G;2_27227706_CA_C;2_27226954_A_G;2_27225144_C_A;2_27224209_T_C;2_27217228_G_A;2_27217102_T_A;2_27215269_A_T;2_27213937_T_C;2…			0.3960396039603961	2	1	27193480	27250064	0.8186597942382754	2_27140342_C_T	1.3167989878304047
ENSG00000085063	ENSG00000085063	E9PNW4	11_33755956_C_T	rs3181269	1.177290506497636e-13	3.7483672921380895e-15	1.0	2.3197064529154305e-25	-0.9993435616990779	2.343965885471624e-20	-0.8531043310365951	7.937623931548692e-10	-0.7350972028372715	4.579120883109809e-13	-0.8132488230055488	202	9676033.967563843	0.17201686499178118	4	0.1937416907546772	False	33755956,33757770					11_33757770_G_A;11_33755956_C_T;			0.18564356435643564	11	-1	33719807	33757991	0.9999999999999996	11_33755956_C_T	3.8577886633663367
ENSG00000085377	ENSG00000085377	P48147	6_105778067_C_T		0.037022329691745286	0.012372556627640498	1.0	4.1492402089076365e-05	-0.3051908812766931	8.783022961946931e-17	-0.3107990709368349	1.997780153444541e-05	-0.4273841422614688	1.6317416414301857e-06	-0.2606180354502676	202	68708879.6359602	0.12888582920274425	36	0.10807722075783303	False	105778067,105768250,105769201,105769900,105771166,105774061,105774660,105776289,105776312,105780539,105781584,105782455,105783150,105786497,105787131,105787812,105794333,105794683,105795406,105795907,105796430,105796572,105798482,105799241,105799455					6_105799455_C_T;6_105799241_T_C;6_105798482_T_C;6_105796572_T_C;6_105796430_G_A;6_105795907_C_T;6_105795406_G_A;6_105794683_C_T;6_105794333_A_G;6_105787812_A_G;6_105787131_A_G;6_105786497_T_G;6_105783150_A_C;6_105782455_A_G;6_105781584_C_G;6_105780539_C_T;6_105776312_C_T;6_105776289_T_C;6_105774660_C_G;6_105774061_T_C;6_105771166_C_A;6_105769900_A_T;6_105769201_C_T;6_105768250_G_A;6_105778067_C_T;			0.20297029702970296	6	-1	105725440	105850959	0.9708933717579246	6_105783150_A_C	4.985742797029704
ENSG00000085382	ENSG00000085382	Q8IYU2	6_105162372_T_C		4.868006903680436e-06	5.789412400959057e-07	1.0	4.433203837984567e-11	-0.4068989100113992	0.005699019080691639	-0.2487678694145493	0.010071964732139926	-0.4495722036847524	0.7864446479465426	-0.024078036572483308	196	796159.2111581974	0.2856160366901108	7	0.3528913711990615	False	105162372,105142638,105146360,105146656,105149439,105149713,105154880,105155782,105158405,105158634,105162823,105164470,105167548,105167916,105168358,105169478,105170381,105173445,105175132,105182644,105182839,105183483,105204621,105205826,105207508,105208813,105208814,105209878,105210495,105210604,105210682,105210781,105211360,105215289,105216405,105216969,105219537,105219573,105223663,105225503…		6_105283417_GAAAAGAAATGAGAAA_G;6_105283415_AAGAAAAGAAATG_A;6_105272951_CG_C;6_105259995_TA_T;6_105259148_TGAGC_T;6_105247784_G_GCAAAGTAGGGCGGGGCATC;6_105245944_GA_G;6_105231256_AG_A;	6_105307435_G_A;6_105244526_A_T;	6_105307435_G_A;	6_105307435_G_A;6_105301484_C_G;6_105300570_C_T;6_105299930_G_A;6_105297642_G_C;6_105296150_G_A;6_105295647_C_G;6_105293603_C_T;6_105292547_T_C;6_105291412_A_G;6_105290223_G_A;6_105288927_T_C;6_105286124_A_T;6_105285759_C_T;6_105285750_T_C;6_105283417_GAAAAGAAATGAGAAA_G;6_105283415_AAGAAAAGAAATG_A;6_105282263_C_T;6_105272951_CG_C;6_105270593_G_A;6_105269959_G_A;6_105267809_C_T;6_105266118_A_G;6_1…	6_105307435_G_A;6_105301484_C_G;6_105300570_C_T;6_105299930_G_A;6_105297642_G_C;6_105296150_G_A;6_105295647_C_G;6_105293603_C_T;6_105292547_T_C;6_105291412_A_G;6_105290223_G_A;6_105288927_T_C;6_105286124_A_T;6_105285759_C_T;6_105285750_T_C;6_105283417_GAAAAGAAATGAGAAA_G;6_105283415_AAGAAAAGAAATG_A;6_105282263_C_T;6_105272951_CG_C;6_105270593_G_A;6_105269959_G_A;6_105267809_C_T;6_105266118_A_G;6_1…		0.4975247524752475	6	-1	105175968	105307794			2.1219375297029703
ENSG00000085449	ENSG00000085449	Q8IWB7	2_224802504_A_G	rs10191160	1.7767378080846083e-08	1.347683600185914e-09	1.0	1.7369499804283768e-12	0.5882817904239079	9.580530230078395e-10	0.42983418945942015	8.624249454330055e-06	0.7278996386362371	3.171629243173547e-05	0.4782832674660682	202	25734692.93326959	0.11921752495565098	20	0.1554730904517707	False	224802504,224819470					2_224802504_A_G;			0.1311881188118812	2	-1	224720433	224810104			5.012700545762882
ENSG00000085465	ENSG00000085465	Q12889	1_111976889_G_A	rs1264911	8.863269677252795e-05	1.4068352665755343e-05	1.0	2.3598280565370474e-09	-0.33431848856931384	6.29167002625652e-08	-0.3337220847721006			0.1032249054156328	-0.2424869941374318	84	320459.825885548	0.5005411114858648	1	0.774480421923891	False	111976889,111947430,111949063,111949282,111950546,111953642,111953735,111954258,111957097,111957693,111962944,111963268,111963356,111968316,111968327,111968487,111968743,111969294,111969719,111973893,111977133,111978790,111979028,111980355,111981648,111985229,111991845,111992095,111992823,111993224,112001035,112012037,112012139,112015292	1_111957693_A_G;1_111957097_C_G;		1_111969719_A_G;		1_111969719_A_G;1_111969294_A_G;1_111968743_A_G;1_111968487_G_A;1_111968327_T_C;1_111968316_G_A;1_111963356_C_T;1_111963268_G_C;1_111962944_C_T;			0.4084158415841584	1	-1	111956936	111970399			1.0008043072319626
ENSG00000085491	ENSG00000085491	Q6NUK1	1_108740419_C_T	rs828994	8.346215830086289e-24	4.4940410650119313e-26	1.0	1.8660731215709762e-35	-1.130114087266625	2.6896122093101365e-30	-1.0710747978806472	1.6969939845493244e-21	-1.0723052118977283	1.975168299576418e-24	-1.048994182074882	202	43957634.90313232	0.2451763977333597	27	0.15955859723735924	False	108740419,108734993,108735388,108735787,108737086,108737112,108737302,108737425,108737551,108737806,108738360,108738436,108738624,108739035,108739104,108739171,108739214,108739228,108739434,108739705,108739726,108739849,108740779,108741065,108742892,108742904,108742954,108743042,108743140,108743178		1_108742904_CGCGCAGG_C;1_108739434_AAAG_A;1_108738624_GAA_G;1_108737806_T_TCTAAA;1_108737086_AG_A;		1_108743178_C_G;1_108743140_C_G;1_108743042_C_A;1_108742954_A_C;1_108742904_CGCGCAGG_C;1_108742892_T_G;1_108735388_T_A;	1_108741065_T_C;1_108740779_G_A;1_108739849_C_T;1_108739705_C_T;1_108739434_AAAG_A;1_108739228_A_C;1_108739214_T_C;1_108739171_A_G;1_108739104_A_G;1_108739035_A_G;1_108738624_G_A;1_108738624_GAA_G;1_108738436_A_C;1_108738360_C_A;1_108737806_T_TCTAAA;1_108737551_T_C;1_108737425_T_C;1_108737302_C_G;1_108737112_G_A;1_108737086_AG_A;1_108735787_T_C;1_108735388_T_A;1_108734993_G_C;1_108740419_C_T;	1_108742892_T_G;1_108741065_T_C;1_108740779_G_A;1_108739849_C_T;1_108739705_C_T;1_108739434_AAAG_A;1_108739228_A_C;1_108739214_T_C;1_108739171_A_G;1_108739104_A_G;1_108739035_A_G;1_108738624_G_A;1_108738624_GAA_G;1_108738436_A_C;1_108738360_C_A;1_108737806_T_TCTAAA;1_108737551_T_C;1_108737425_T_C;1_108737302_C_G;1_108737112_G_A;1_108737086_AG_A;1_108735787_T_C;1_108735388_T_A;1_108734993_G_C;1_10…		0.19554455445544555	1	-1	108676658	108743471	0.9999999999999996	1_108740419_C_T	3.3023722174503423
ENSG00000085719	ENSG00000085719	O75131	8_87576834_C_T	rs719039	0.005416442630155227	0.0013394019503876456	1.0	2.719677559000238e-06	0.2406739567484419	0.00020152643277238102	0.15033275474213253	0.022963527196926608	0.2934164683276419	0.28071051155445426	0.0685191665864524	202	33924715.326044306	0.11352557840348007	18	0.0920645740747182	False	87576834,87570665,87570728,87571049,87573644,87574234,87578131,87579546,87579562,87580074								0.3341584158415842	8	1	87497059	87573726			4.070445797029704
ENSG00000085721	ENSG00000085721	F5H148	16_15150773_C_G	rs12928424	8.125437329881856e-15	2.1495362712785887e-16	1.0	1.142060059644522e-24	-0.8193644347108527	7.1241273053462825e-22	-0.7059828436971199	0.13975168067122953	-0.3159661370642506	0.6023135224603798	0.04325911438824925	198	1076882.0898985614	0.2356437088922297	8	0.26238020485583313	False	15150773,15150833,15151361,15166232,15168760,15177695					16_15177695_T_A;16_15168760_T_C;16_15166232_A_G;			0.37376237623762376	16	-1	15153879	15188174			3.869828995049505
ENSG00000085760	ENSG00000085760	P46199	2_55505681_T_G	rs2576696	0.06670992010650906	0.024937272610831517	1.0	1.4872332282721118e-05	0.41202305465454897	0.0004867806676375002	0.3311557909618925	0.5728853009106603	0.38706917503522403	0.06115568947149589	0.20785147650275626	202	6342703.9340826925	0.13522733268046822	12	0.1345554404294635	True	55505681								0.1782178217821782	2	-1	55463731	55496483			4.337340638288858
ENSG00000085871	ENSG00000085871	Q99735-2	4_140587125_A_T	rs2132845	0.0004423837655014298	8.057463878265536e-05	1.0	4.691402630382225e-10	-0.9571027347858528	3.003528944274345e-08	-1.0504745014827424	0.3686043899950217	-0.2054731322146217	0.1831957001877521	-0.2959593214222027	132	394570.5796235884	0.21236499691230548	1	0.25093396789772604	False	140587125				4_140587125_A_T;				0.06930693069306931	4	1	140586922	140661899			1.6404333663366335
ENSG00000085978	ENSG00000085978	Q676U5	2_234199461_G_A	rs6754677	1.674030328513316e-15	3.958259702208707e-17	1.0	1.0882537818969355e-20	0.6689687583336182	2.547185541142952e-09	0.5730107401186645	2.2258770974239707e-05	0.4892857494202101	3.3245488401094586e-07	0.5021731695967269	202	6735606.402085355	0.12697115758535288	18	0.1476096145879186	True	234199461,234144883,234148043,234154683,234166322,234167020,234170397,234173270,234194957					2_234194957_T_G;2_234173270_C_G;2_234170397_G_A;2_234167020_A_G;2_234166322_G_A;2_234154683_C_A;2_234148043_G_A;2_234144883_G_A;2_234199461_G_A;			0.3712871287128713	2	1	234118697	234204320	0.5847115443081198	2_234172846_A_G	2.676587660074957
ENSG00000085982	ENSG00000085982	Q9NVE5	2_234464498_T_C	rs62192777	6.365095136563764e-10	3.770031767647506e-11	1.0	2.7243575990123514e-18	1.0160321415500029	2.209164507504966e-10	0.7375890787331479	0.00871684966500045	0.3939373861436253	0.14585660917740834	0.21728008689302625	188	1401424.139646335	0.3792250995676084	2	0.5915523125597495	False	234464498,234361802,234475415				2_234475415_G_A;	2_234464498_T_C;			0.17574257425742573	2	-1	234384166	234475428			1.3693046593087694
ENSG00000085998	ENSG00000085998	Q8WZA1	1_46641424_G_A	rs68179532	0.0954674270260374	0.038899931344684086	1.0	7.369912129626521e-05	-0.3897555021271079	0.1150708729556102	-0.2998662057038005	2.508010951163788	-0.05306758150268792	0.3555448189152447	-0.1825125181922079	170	471567.9516049517	0.3377009606795695	3	0.4053540135080731	False	46641424,46612106,46618911								0.09405940594059406	1	-1	46654354	46685977			3.1750511581606338
ENSG00000085999	ENSG00000085999	Q92698	1_46768408_T_C	rs1547180	0.08730645842827416	0.034797903657763495	1.0	3.885467069812268e-05	-0.3505136770990828	0.023979517808841555	-0.3361074830425399	0.6803433726301149	-0.34202411540816513	0.047405155925443136	0.2245164764377191	202	2827818.389382669	0.22132150909995552	9	0.2946018184107736	False	46768408,46694701,46701282,46701286,46710205,46718905,46718917,46731694,46734792,46753027,46754486,46757292,46761496,46772619,46779786,46780511,46781462,46781602,46786874,46788012,46788306,46790764,46797110,46797692,46798545					1_46734792_C_T;1_46731694_C_T;1_46718917_T_C;1_46718905_G_A;			0.2400990099009901	1	1	46713360	46744145			3.990033429734682
ENSG00000086062	ENSG00000086062	P15291	9_33178815_T_C	rs10971437	0.00034904996775987195	6.234932117541433e-05	1.0	2.5554578016371913e-09	-0.7200707012243321	2.27511948321918e-06	-0.5258933210445221	0.4543389430189277	-0.3465245349385013	0.2824375141347334	-0.19588022193411792	193	703766.3782245548	0.2357094955261695	7	0.22807754629720514	False	33178815,33114932,33116517,33119962,33123851,33127686,33144933,33149268,33154108,33157634,33160779,33166615,33169681,33171137,33172181,33172637,33174464,33174654,33180671,33185620,33187897					9_33166615_T_C;9_33160779_A_T;9_33157634_T_C;9_33154108_C_T;9_33149268_A_T;9_33144933_G_A;9_33127686_C_T;9_33123851_C_T;9_33119962_G_T;9_33116517_A_C;			0.05198019801980198	9	-1	33104080	33167354			3.2185229950495047
ENSG00000086200	ENSG00000086200	Q9UI26	5_61730911_G_A		0.00042449260747538206	7.701785574000259e-05	1.0	5.56573927597115e-07	0.18265180645866527	0.05006228801576161	0.15206849939163328	0.03753014471790457	0.2666774955981597	0.01876650671130212	0.18674567825421207	202	27279725.683444824	0.1111704098709847	25	0.07714580303178585	False	61730911					5_61730911_G_A;	5_61730911_G_A;		0.2227722772277228	5	1	61699799	61924409			3.694205232673267
ENSG00000086232	ENSG00000086232	Q9BQI3-2	7_6065194_G_A	rs17343667	2.204856900891293e-22	1.6517715282341423e-24	1.0	3.0918567135723716e-35	1.123118070161981	3.389886843236217e-32	0.7421014722369309	0.0081225327665392	0.2781985861000247	0.1089570166862418	0.15055113624599434	202	2372504.827827359	0.2529561580732028	7	0.3956137875222248	False	6065194,6026988,6029748,6030287,6031101,6035428,6038045,6038722,6040631,6041818,6041836,6042522,6045385,6051368,6052638,6053054,6055882,6057068,6061915,6063283,6064799,6066783,6070528,6071060,6073644,6074199,6075823,6079951,6090727,6092365,6092639,6094701,6097229,6097667,6098301,6099488,6099699,6099966,6101062,6101068,6101800,6102034,6102055,6102600,6102719,6102951		7_6097229_TA_T;7_6092364_CG_CA;7_6073248_GTCTCGCTCTGTCGCCCAGGCTGGAGTGCAGTGGCACCATTCTCCTGGGTTCACGCCATTCTCCTGCCTCAGCCTCCCAAGTAGCTGGGACTACAGGCGCCTGCCACCACGCCTGGCTAATTTTTTGTATTTTTAGTAGAGATGGGGTTTCACCATGTTAGCCAGGATAGTCTCAATCTCCTGACCTCGTGATCCGTCCACCTCAGCCTCCCAAAGTGCTGGGATTACAGGCGTGAGCCGCCGTGCCTGGCCGACAATGGATTTTCTTGTTTATTACTCTCCACTAGAAGGTAAGCCGCATGAAAGAGAAGTTGACCTTGTGCACCACTGTATCTCCAGCACCTCAACCAAATCAATG…		7_6063283_C_T;7_6061915_T_C;	7_6098301_C_T;7_6097667_T_A;7_6097229_T_A;7_6097229_TA_T;7_6094701_C_T;7_6092639_G_T;7_6092365_G_A;7_6092364_CG_CA;7_6090727_C_T;7_6079951_C_T;7_6075823_A_T;7_6074199_C_G;7_6073644_G_A;7_6073248_GTCTCGCTCTGTCGCCCAGGCTGGAGTGCAGTGGCACCATTCTCCTGGGTTCACGCCATTCTCCTGCCTCAGCCTCCCAAGTAGCTGGGACTACAGGCGCCTGCCACCACGCCTGGCTAATTTTTTGTATTTTTAGTAGAGATGGGGTTTCACCATGTTAGCCAGGATAGTCTCAATCTCCTGACCTCGTGATCCGTCCACCTC…			0.4084158415841584	7	-1	6061881	6098861			5.023818915841585
ENSG00000086289	ENSG00000086289	Q9UM22	7_37989775_T_C	rs1450851	0.0023213335998175807	0.0005081228879385317	1.0	6.1529954156591195e-09	-0.3694654602545784	1.1282030362961406e-08	-0.3797107766797829	0.16108704619478195	-0.3704166547143912	0.032684208512438966	-0.3035903718592601	124	576872.9514263843	0.3400743908722315	2	0.4357719803421178	False	37989775					7_37989775_T_C;			0.301980198019802	7	1	37723446	37991543			2.098243008910891
ENSG00000086504	ENSG00000086504	Q13084	16_419733_A_C	rs114829852	0.011615470119358156	0.003180215920540645	1.0	4.959935562766735e-07	0.5960187565039554	0.0035409774375986915	0.5433267205364507	1.3810459444862018	0.1034406675663298	0.383707942599484	0.11980605904646445	202	7094520.596680072	0.2015126309908105	6	0.19226879620988674	True	419733,419512,419805,419923,420267,420468,421912,422544,423775,424695,425942,428770,430011,430215,431209,431609,433128		16_420267_AGGCCCC_A;	16_419923_G_C;	16_420468_G_A;	16_420468_G_A;16_420267_AGGCCCC_A;16_420267_A_C;16_419923_G_C;16_419805_A_C;16_419512_G_T;16_419733_A_C;			0.07425742574257425	16	-1	417384	420527			5.046495118811881
ENSG00000086598	ENSG00000086598	Q15363	12_124036984_G_A	rs7314792	3.354557590366756e-07	3.274236788656422e-08	1.0	7.004550332038528e-11	-0.519214483846615	2.296248446520724e-06	-0.37004060901788427	1.7006355901011654	-0.15983995792270494	0.3536725146358017	-0.10176275879963148	202	14474019.869540725	0.18467838126424407	6	0.2593076430488052	False	124036984,124019231,124022064,124022967,124023020,124024519,124027372,124027744,124035781,124036188,124038455,124041729,124042949,124045490,124045580,124046424,124051951,124053767,124054641,124054766,124055507,124055605,124056441,124056685,124056715,124057112,124058009,124058169,124058937,124059546,124061397,124061421,124062742,124063941,124063965,124064537,124064918,124064998,124065116,124065428…		12_124077787_A_AT;12_124072734_GT_G;12_124071507_AT_A;		12_124071144_G_T;	12_124079920_A_G;12_124078791_C_A;12_124077787_A_AT;12_124077787_A_T;12_124076806_T_C;12_124076254_C_T;12_124075915_G_T;12_124075268_C_A;12_124075111_A_G;12_124074744_C_G;12_124073911_C_T;12_124072734_GT_G;12_124071864_G_A;12_124071765_C_A;12_124071507_AT_A;12_124071144_G_T;12_124070013_G_A;12_124069614_T_A;			0.12623762376237624	12	1	124069078	124083116			6.017393504950495
ENSG00000086827	ENSG00000086827	O43264	11_113655696_A_G	rs17542254	0.03362282414599653	0.010972776977529946	1.0	0.00010436233789240872	-0.1970928597143824	0.00627413295692192	-0.14732609560421128	0.014152469954730153	-0.4238036889144505	0.3846283404530013	0.05409800424496592	202	29507381.93887848	0.09246189025020957	43	0.1190271896791585	True	113655696								0.3094059405940594	11	-1	113603909	113644533			3.8953627326732674
ENSG00000087008	ENSG00000087008	O15254	4_8377514_A_G	rs10030108	0.07198213956948044	0.02752729134654016	1.0	3.9177154221542046e-05	0.3857092620927658	4.6607681679978886e-05	0.346472050910149	0.00016064244201456586	0.598253659143039	9.913564810479131e-06	0.3825434086345012	202	2586713.397276463	0.2170103072080028	12	0.2983718655503473	False	8377514,8370165,8371620,8372020,8373088,8374359,8375813,8378332					4_8378332_G_C;4_8375813_C_T;4_8374359_T_C;4_8373088_T_C;4_8372020_T_C;4_8371620_T_C;4_8370165_T_C;4_8377514_A_G;			0.3787128712871287	4	-1	8368009	8442450	0.09362918745507473	4_8370667_A_T	1.852993722772277
ENSG00000087053	ENSG00000087053	Q13614	11_95646774_G_A	rs4430471	0.0007882907030145487	0.0001514204663053815	1.0	1.872650014461049e-06	0.28105744899094737	0.0004399304497874699	0.27034096877704444	1.253652480812456	0.4718006673996977	0.5521364634454161	0.04914797443532404	202	7030508.442024694	0.1232416888398931	22	0.13838894681252015	False	95646774,95491692,95492148,95492878,95498269,95500140,95500628,95502106,95502128,95503636,95505888,95506284,95506907,95507872,95509037,95509638,95510089,95511445,95514599,95517576,95521953,95522858,95523030,95523123,95524719,95528045,95528209,95529242,95530125,95531748,95532166,95533557,95536870,95537828,95538624,95539122,95539591,95539979,95543211,95543715,95544391,95544681,95545170,95545369,955…	11_95657111_T_G;	11_95653862_CACA_C;11_95630222_TA_T;11_95608447_CT_C;11_95583439_TA_T;		11_95657111_T_G;11_95567905_C_T;11_95567035_C_T;11_95566886_G_A;11_95566520_A_G;	11_95656648_C_T;11_95656385_A_C;11_95656364_C_A;11_95656362_GCC_ACA;11_95656362_GCC_ACA;11_95656362_G_A;11_95655481_G_A;11_95653862_CACA_C;11_95653494_T_C;11_95649543_G_A;11_95644179_T_A;11_95643777_T_A;11_95641775_G_A;11_95637416_T_A;11_95630222_TA_T;11_95628606_A_G;11_95624669_A_G;11_95623313_G_C;11_95622679_T_G;11_95621926_A_G;11_95619292_G_C;11_95617788_T_C;11_95616201_C_T;11_95608588_C_A;11_…		11_95580926_G_A;	0.2797029702970297	11	-1	95566046	95658479			4.221057886138614
ENSG00000087077	ENSG00000087077	Q15654	7_100401433_A_G	rs221005	0.018047653878538947	0.005275078044564175	1.0	6.627257936766246e-06	-0.27227655652524224	0.0002500537636227212	-0.3166859147713165	0.08992397367288411	-0.197004936125814	0.07405233268392758	-0.10581823913085707	202	32953665.63014571	0.15318406969891402	22	0.10186239550573788	True	100401433,100406915,100419228,100423365,100423841,100428901,100428969,100433011,100433794								0.3292079207920792	7	1	100464760	100471076			5.17449098019802
ENSG00000087086	ENSG00000087086	P02792	19_49261038_A_G	rs1688263	0.05747767285083369	0.020784809465645985	1.0	1.8892845817897975e-05	0.2674465095287733	8.968159267617979e-06	0.3471828448003268	1.2900500216899324	0.3002177930293177	0.9392525499729192	0.008786135257844774	193	4127787.282510677	0.3292651502703118	5	0.4291921026818442	True	49261038,49261638,49261654,49261762								0.2920792079207921	19	1	49468558	49470135			10.304884782178219
ENSG00000087095	ENSG00000087095	H0YD75	17_26325677_G_C	rs35787376	0.027454949405280205	0.008651378180851493	1.0	3.452918221848559e-05	0.4277685157119547	0.012982984461495069	0.28456586138749623	2.8596106940968413	0.021230319569696118	0.2664934100249849	0.1705294619885056	131	365730.1933628053	0.2337668858337333	3	0.3546062494406929	False	26325677								0.15841584158415842	17	1	26368763	26523407			3.929556910891089
ENSG00000087157	ENSG00000087157	Q32NB8	17_76375095_A_G	rs4490057	0.018895792694902446	0.005571637808551944	1.0	1.1838817362711044e-06	-0.2923177505078563	1.0099820578614387e-11	-0.4553423396865582	0.4730876460175766	-0.37364213757221787	0.2209072458032499	-0.12168432506689242	202	2112785.4031276642	0.190061883632137	13	0.3981299243310231	False	76375095,76369480,76370557,76370896,76377482,76378869,76379332,76381021,76382079,76382791,76383671,76387244,76387363,76390080,76391653,76392144,76393030,76393372,76393413,76398304,76401328,76402105,76403984,76404184,76404189		17_76404189_ATCAG_A;17_76379332_CT_C;	17_76378869_G_A;		17_76404189_ATCAG_A;17_76403984_G_A;17_76402105_A_T;17_76401328_C_T;17_76398304_G_A;17_76393413_G_A;17_76393372_A_G;17_76393030_T_C;17_76392144_G_A;17_76391653_C_T;17_76390080_C_T;17_76387363_G_T;17_76387244_A_G;17_76383671_C_T;17_76382791_C_T;17_76382079_C_T;17_76381021_C_T;17_76379332_CT_C;17_76378869_G_A;17_76377482_T_G;17_76375095_A_G;	17_76404189_ATCAG_A;17_76403984_G_A;17_76402105_A_T;17_76401328_C_T;17_76398304_G_A;17_76393413_G_A;17_76393372_A_G;17_76393030_T_C;17_76392144_G_A;17_76391653_C_T;17_76390080_C_T;17_76387363_G_T;17_76387244_A_G;17_76383671_C_T;17_76382791_C_T;17_76382079_C_T;17_76381021_C_T;17_76379332_CT_C;17_76378869_G_A;17_76377482_T_G;17_76375095_A_G;		0.4702970297029703	17	1	76374721	76421195			2.963799544554455
ENSG00000087191	ENSG00000087191	P62195	17_61783553_T_G	rs9944483	1.1154093497788453e-07	9.988155830279954e-09	1.0	9.474587837332347e-12	0.3452790885657949	0.00018896401839627527	0.3860394925879674	0.7881064009075041	0.1442651535898718	0.7072797558211323	-0.03128167802371306	202	85889160.67038672	0.09499759371751253	24	0.09225294602675596	True	61783553,61763185,61778167,61781331,61787684,61788859,61790917,61792221,61798113,61801806,61803125,61805369,61806301,61806380,61807442,61808561,61811642,61818390,61818485,61819680,61821209,61826837,61828385,61834736,61835870,61837734,61848499,61848973,61850359,61851435,61851588,61854375,61862140,61862889,61871995,61872295,61873307,61874881,61878535,61878584,61879501,61880641,61887561,61892862,618…				17_61908556_C_T;	17_61906679_G_A;	17_61908556_C_T;17_61906679_G_A;	17_61908556_C_T;	0.3564356435643564	17	1	61904512	61909379			4.827251123762376
ENSG00000087253	ENSG00000087253	Q7L5N7	16_55538977_C_T	rs243833	0.0019840441553001546	0.0004245385363325158	1.0	1.4872421353024734e-07	0.3304540901015319	8.016474332111627e-05	0.3623101669638033	0.2891439836935465	0.24416587675839674	0.17587222314140327	0.13792656887227306	166	380973.0429601617	0.28730756736280977	5	0.2980214201031361	False	55538977,55534236,55536622,55536687,55536727,55538799,55538872,55539191,55539614,55540973,55541040,55542679,55543647,55543878,55544549,55545346,55545607,55545612,55547235,55548322,55548681,55549159,55549618,55549860,55549915,55550237,55551590,55552745,55553000,55553151,55553158,55553218,55553460,55554225,55554737,55555277,55555935,55556461,55557761,55557818,55558559,55558576,55560081,55561067,555…		16_55558558_GC_G;16_55555935_CAT_C;16_55555934_ACA_A;16_55553000_T_TAACCC;16_55549159_T_TAC;			16_55564010_C_A;16_55563016_G_A;16_55561665_A_G;16_55561080_T_C;16_55561067_A_G;16_55560081_G_T;16_55558576_C_T;16_55558559_C_A;16_55558558_GC_G;16_55557818_G_T;16_55557761_G_A;16_55556461_A_G;16_55555935_CAT_C;16_55555934_ACA_A;16_55555277_G_A;16_55554737_C_T;16_55554225_G_A;16_55553460_A_G;16_55553218_T_C;16_55553158_G_A;16_55553151_A_G;16_55553000_T_TAACCC;16_55552745_G_A;16_55551590_C_G;16_55…			0.4950495049504951	16	1	55542910	55620582			1.0660000633663367
ENSG00000087258	ENSG00000087258	P09471-2	16_56193395_A_C	rs62039159	0.04810438325510463	0.0169127461894506	1.0	1.3644710409920896e-05	-0.28818743688408216	0.003560670163711804	-0.25378034969955804	0.6230568989758767	-0.2369361564580097	0.3205135667934644	-0.09832759785335754	202	6264123.290351836	0.15730432073529352	11	0.11640750058563375	False	56193395								0.4900990099009901	16	1	56225302	56391356			2.2973438613861386
ENSG00000087263	ENSG00000087263	Q8N543	16_56575448_C_T	rs12446809	0.027768622948744912	0.008772973585234989	1.0	2.3905631897764964e-05	-0.2765250121520625	0.0025520915796530827	-0.2005567075262473	0.6646590249684052	-0.35767269984900274	0.9118172633829648	0.00764497523580232	202	17443070.242280208	0.11720467006537028	22	0.14293751643996433	False	56575448								0.4900990099009901	16	1	56485402	56513012			3.9021147772277227
ENSG00000087269	ENSG00000087269	P78316	4_2951804_A_G	rs2515960	0.002410757918112157	0.0005310835071856584	1.0	1.7202378306072952e-06	-0.27071267364296003	0.012965299767390005	-0.21574745356155567	0.5909028786242894	-0.3200517211349969	0.6838959510717633	0.029903393355822594	202	17988824.36782508	0.10371526848662728	24	0.15685696831482285	False	2951804,2941988,2943361,2943672,2944571,2944620,2944746,2948456,2950899,2951519,2952506,2953703,2955145,2955192,2955465,2956963,2958789,2959672,2959765,2961310,2965611,2971497,2976638,2988636,2991040,3003201,3003739,3004112,3008649,3014319,3015001,3016246,3016790,3017054,3017639,3020936,3021892,3022536,3022553,3023840,3024448,3024723,3025015,3026173,3026317,3026448,3027186,3027493,3027897,3028499	4_2943361_T_C;4_2951804_A_G;	4_2961310_ACT_A;4_2961309_GAC_G;4_2944571_C_CAT;			4_2961310_ACT_A;4_2961309_GAC_G;4_2959765_C_T;4_2959672_A_G;4_2958789_A_C;4_2956963_A_G;4_2955465_T_C;4_2955192_C_G;4_2955145_T_C;4_2953703_A_G;4_2952506_A_G;4_2951519_A_G;4_2950899_T_C;4_2948456_G_A;4_2944746_T_C;4_2944620_T_C;4_2944571_C_CAT;4_2943672_G_C;4_2941988_T_C;			0.4306930693069307	4	-1	2939660	2965112			4.137050737623762
ENSG00000087299	ENSG00000087299	Q9H9P8	14_50782765_A_T	rs12590337	7.764385347552372e-12	3.3264251869415524e-13	1.0	1.1058237849634304e-16	-0.5273955890840822	5.039477107494128e-13	-0.441587606060096	1.2159771402883299e-05	-0.4831548325951385	8.348455449017996e-08	-0.3977106832385111	202	11551506.548752775	0.1900790625698708	18	0.15334869398537682	False	50782765,50714274,50714985,50722359,50726304,50727010,50727109,50727219,50727483,50728736,50729250,50730492,50732947,50734100,50736725,50739485,50740191,50740605,50740700,50743180,50743732,50745123,50746096,50747337,50748853,50749924,50750316,50750577,50751199,50751565,50753242,50753992,50754681,50755671,50755991,50756089,50757095,50757131,50759678,50761847,50765758,50768483,50769327,50769455,507…	14_50778816_A_C;	14_50776279_TA_T;14_50775740_G_GC;14_50775740_GTTTTGAGAGT_G;14_50770177_T_TA;14_50768483_ATA_A;14_50746096_TG_T;14_50745123_A_ATTACTT;		14_50779229_C_T;14_50750577_A_G;	14_50777430_T_C;14_50776545_A_G;14_50776279_TA_T;14_50776241_C_T;14_50775740_G_GC;14_50775740_GTTTTGAGAGT_G;14_50775319_C_A;14_50773576_T_C;14_50773540_T_A;14_50773296_T_G;14_50772403_C_T;14_50770177_T_TA;14_50770177_T_A;14_50769901_A_G;14_50769455_G_T;14_50769327_A_G;14_50768483_A_G;14_50768483_ATA_A;14_50765758_G_A;14_50761847_G_C;14_50759678_A_G;14_50757131_A_C;14_50757095_C_T;14_50756089_C_T;…		14_50769717_G_A;	0.4108910891089109	14	-1	50704281	50779266	0.929884315025156	14_50802727_A_C	3.3807936188118815
ENSG00000087301	ENSG00000087301	Q9P2K2	14_52924277_T_A	rs8015227	1.701630844527766e-12	6.632834732854337e-14	1.0	1.9347024310962555e-22	-1.2931328723104285	1.3133989725619333e-21	-0.9815400229068036	0.12489737966838982	-0.6523760616018244	0.6351852642179251	-0.06463493866357227	202	2510854.52494166	0.21568801446860664	8	0.5325164493851213	False	52924277,52898076,52900800,52905309,52908825,52910297,52910793,52910938,52911293,52912750,52915878,52917209,52920540,52921403,52922346,52923622,52927637,52929575,52930165,52932197,52934133,52939011,52939205,52939584,52953137,52954555,52955808,52956192,52957353,52957988,52958053,52964368,52965219,52967604,52967658,52967659,52970497,52970939,52970947,52972249,52973142,52973970,52976301,52977272,529…		14_52994641_GA_G;14_52982344_TTCTTC_T;14_52977272_A_AG;14_52976301_G_GAT;14_52954555_AAG_A;		14_52929575_T_A;14_52898076_A_G;	14_53018790_C_T;14_53018477_T_C;14_53016948_C_T;14_53015992_A_G;14_53012547_C_T;14_53008971_A_G;14_53008120_A_C;14_53007210_G_A;14_53006690_T_C;14_53000646_A_G;14_52999165_T_C;14_52994641_GA_G;14_52994049_A_G;14_52993003_C_T;14_52992409_C_T;14_52985156_A_C;14_52982666_A_C;14_52982662_T_G;14_52982581_T_G;14_52982344_TTCTTC_T;14_52980672_A_G;14_52979684_C_T;14_52979293_T_A;14_52979292_C_T;14_529790…	14_52934133_C_A;14_52932197_C_T;14_52930165_C_T;14_52929575_T_A;14_52927637_G_T;14_52923622_A_G;14_52922346_C_T;14_52924277_T_A;		0.07920792079207921	14	-1	52897308	53019240			3.1540803514851485
ENSG00000087303	ENSG00000087303	Q14112-2	14_52589352_G_C	rs10151225	7.875757684155494e-08	6.859253871578632e-09	1.0	6.213057739138444e-14	-0.4782217089413116	5.4053585542083806e-14	-0.4682376004229596	0.00011068548167140657	-0.9581991179202458	0.04152393120897742	-0.3128396394540358	87	256296.37386531426	0.3682419083762556	1	0.2887097080920851	False	52589352,52591577,52609514,52610778,52613711,52614570,52615506,52615986								0.4108910891089109	14	-1	52471521	52535712			2.2959260643564354
ENSG00000087448	ENSG00000087448	Q9P2K6	12_27870676_G_A	rs4930933	0.0040370926109125375	0.0009555846249159748	1.0	5.791694820711665e-07	0.3452958378501068	1.6206889701538773e-06	0.27305403300728964	0.2274345657383376	-0.2338550237328043	0.7240648222943532	-0.05549465612309712	80	422116.3409718388	0.2627841707349551	1	0.6140983669892324	False	27870676								0.1782178217821782	12	1	27932953	27955973			2.6274206287128714
ENSG00000087470	ENSG00000087470	O00429	12_32841294_G_C	rs7305407	0.028076431942362624	0.008880079492949059	1.0	2.4330285265107217e-06	-0.3732021181040833	1.625414122372649e-14	-0.5997481522419529	1.5029545139764084	-0.22024294170975434	0.9303849819761802	0.046106073733934494	202	53319691.24849999	0.10794015139983433	36	0.07883520555458001	True	32841294,32819180,32822103,32824887,32825282,32826516,32826592,32828462,32828466,32828480,32828959,32828976,32829221,32829228,32829576,32829754,32829980,32830040,32830114,32830149,32830300,32831091,32831195,32831342,32831346,32832869,32832873,32832897,32832990,32833155,32834930,32834931,32835090,32835100,32835123,32835309,32835383,32835403,32835433,32836424,32836720,32837000,32837310,32837534,328…	12_32860302_G_A;	12_32896364_AGA_A;12_32896364_AGA_A;12_32896162_ATT_A;12_32892089_GAC_G;12_32890317_CATTT_C;12_32890310_ATTTAAGCATTTA_A;12_32890309_GATTTAAGCATTT_G;12_32884187_AAAAAGCATTTTTCATG_A;12_32883555_T_TACTA;12_32878009_TTTC_T;12_32875804_T_TTAAA;12_32868663_CA_C;12_32863552_CAAA_C;12_32855975_GTCTTTCTC_G;12_32855911_C_CACTA;12_32853073_GAGA_G;12_32852986_GCAAAAAC_G;12_32852909_C_CAAATCTAT;12_32852245_TA…	12_32860302_G_A;	12_32897586_G_A;12_32897557_G_T;12_32897437_T_C;12_32897088_A_T;12_32896615_C_G;12_32896366_A_T;12_32896365_GA_CT;12_32896364_AGA_A;12_32896365_GA_CT;12_32896365_G_C;12_32896364_AGA_A;12_32875406_A_G;12_32860302_G_A;12_32854366_A_C;	12_32896162_ATT_A;12_32894781_C_T;12_32894729_C_T;12_32894603_G_A;12_32894269_G_C;12_32894258_C_T;12_32894215_C_G;12_32894129_C_T;12_32892678_C_T;12_32892089_GAC_G;12_32890343_G_A;12_32890317_CATTT_C;12_32890310_ATTTAAGCATTTA_A;12_32890309_GATTTAAGCATTT_G;12_32890161_C_T;12_32889162_T_C;12_32887272_T_C;12_32886193_C_T;12_32886015_T_C;12_32885110_G_A;12_32884187_AAAAAGCATTTTTCATG_A;12_32883555_T_T…	12_32896615_C_G;12_32896366_A_T;12_32896365_GA_CT;12_32896364_AGA_A;12_32896365_GA_CT;12_32896365_G_C;12_32896364_AGA_A;12_32896162_ATT_A;12_32894781_C_T;12_32894729_C_T;12_32894603_G_A;12_32894269_G_C;12_32894258_C_T;12_32894215_C_G;12_32894129_C_T;12_32892678_C_T;12_32892089_GAC_G;12_32890343_G_A;12_32890317_CATTT_C;12_32890310_ATTTAAGCATTTA_A;12_32890309_GATTTAAGCATTT_G;12_32890161_C_T;12_3288…	12_32875406_A_G;12_32860302_G_A;12_32854366_A_C;	0.1311881188118812	12	1	32832134	32898486			4.3635925099009905
ENSG00000087884	ENSG00000087884	E9PNP3	11_77444469_C_T	rs4945205	2.0289296844458936e-08	1.5413500704733524e-09	1.0	8.650066249840753e-11	-0.7031679624326552	5.331089992109321e-06	-0.7210978035411332	8.025949331815287e-12	-0.8844620525804388	2.9916382079380267e-19	-0.9353670376876896	202	6019103.1400149735	0.20366851556504084	6	0.16247411188986471	False	77444469,77245728,77245947,77250912,77253788,77254266,77257804,77276462,77280090,77281474,77281589,77281636,77282025,77282081,77282167,77282207,77282510,77283055,77283394,77283395,77283672,77283687,77283882,77284948,77284991,77285411,77288495,77289035,77289090,77289678,77290439,77290835,77291457,77292650,77292707,77292857,77294685,77295579,77296055,77296096,77296319,77298292,77298406,77298815,772…	11_77583266_G_A;	11_77607698_CAA_C;11_77590176_GAAAAAAAGATAAAAGAAATCCTCTATAACTAGGCAACTGCTAGGAATGAGGATGAAATGTGAAGTTAAAGAAATATCAAAATGGAAGCAGTAGGGAGAAATTTCTTCATCCGTCTACATTCCCTCCCCTTACCCTCACCAAACAAAACACTGAGCCTGCAGATGTGATGCTGTTCCATCACCTTCCCCTTGGGCTCACTGTGGCACAGAGCCAAAGCTGCTGAGGCAACTGGAGAGCAAGCTAAAAACCCTTCCAGGAAGATAATTGCTTCATGATCTGCTTTATGAACTGGGCTCAAATTCTTATGCAGGTGTGGATTTGGGCAGTTTCAGAAGGTGCATGTGGCTTATTCTGATACCCAGTTGGGC…			11_77626963_A_T;11_77610220_G_C;11_77608554_A_T;11_77608106_G_A;11_77608101_A_G;11_77607698_CAA_C;11_77607589_T_C;11_77604496_A_G;11_77604071_G_A;11_77603520_T_C;11_77603261_G_C;11_77600361_A_G;11_77599576_T_C;11_77597099_A_T;11_77595080_C_T;11_77593347_A_G;11_77590176_GAAAAAAAGATAAAAGAAATCCTCTATAACTAGGCAACTGCTAGGAATGAGGATGAAATGTGAAGTTAAAGAAATATCAAAATGGAAGCAGTAGGGAGAAATTTCTTCATCCGTCTACATTCCCTCCCC…	11_77610220_G_C;11_77608554_A_T;11_77608106_G_A;11_77608101_A_G;11_77607698_CAA_C;11_77607589_T_C;11_77604496_A_G;11_77604071_G_A;11_77603520_T_C;11_77603261_G_C;11_77600361_A_G;11_77599576_T_C;11_77597099_A_T;11_77595080_C_T;11_77593347_A_G;11_77590176_GAAAAAAAGATAAAAGAAATCCTCTATAACTAGGCAACTGCTAGGAATGAGGATGAAATGTGAAGTTAAAGAAATATCAAAATGGAAGCAGTAGGGAGAAATTTCTTCATCCGTCTACATTCCCTCCCCTTACCCTCACCAAACA…		0.12376237623762375	11	1	77532155	77629478	0.8879761626904021	11_77325222_A_G	2.4308691782178222
ENSG00000088035	ENSG00000088035	A2A2G4	1_63848408_G_A	rs112203355	7.04545282984447e-10	4.2059943149018843e-11	1.0	3.824239297302632e-15	-0.9284706110327784	1.0787189932506534e-10	-0.6679017643969101	0.0005422855940156932	-0.35113289097773936	4.523237167416373e-05	-0.3338093194889851	202	5564888.553983248	0.2064253532497976	5	0.16792473260658436	False	63848408,63904661,63934318,64045528					1_63848408_G_A;	1_63848408_G_A;		0.10891089108910892	1	1	63833261	63904233			3.0501856376335574
ENSG00000088256	ENSG00000088256	P29992	19_3103250_T_C	rs4807401	0.0851093639679791	0.03370302918221623	1.0	6.026593437658618e-05	0.2779854135613506	0.0005974241756940481	0.23045970748235564	0.02316698760997224	0.4303956046785198	0.03530055765713447	0.23742799769400325	202	3842824.6358499588	0.15055594901166472	9	0.19700600802906784	True	3103250,3106306					19_3106306_A_G;19_3103250_T_C;			0.1806930693069307	19	1	3094408	3124002			2.9456127128712875
ENSG00000088280	ENSG00000088280	Q8TDY4-3	1_23755513_T_C	rs1198430	1.3379405265993685e-06	1.4396004083239626e-07	1.0	2.5025928836501777e-10	0.6703116510146502	2.675889092702192e-07	0.4707304557055748	0.031672425664506336	0.6351567479229663	0.09054892610603399	0.2459567053117451	202	3319157.5970385037	0.1548856110875757	19	0.21525425834773634	False	23755513,23735241,23747766,23749593,23753533,23755716,23756155,23758134,23760408,23765472,23769674,23773851,23792009,23801081,23801101,23810063,23813592		1_23792008_TG_T;		1_23756155_T_C;1_23755716_T_C;1_23755513_T_C;	1_23810063_C_G;1_23801101_T_C;1_23801081_A_T;1_23792009_G_T;1_23792008_TG_T;1_23773851_A_G;1_23769674_A_G;1_23765472_A_G;1_23760408_A_G;1_23758134_A_G;	1_23765472_A_G;1_23760408_A_G;		0.10396039603960396	1	-1	23755056	23811061			3.7622660116681925
ENSG00000088367	ENSG00000088367	Q9H4G0	20_34715437_A_G	rs6142512	0.00046447085987838397	8.486936816927982e-05	1.0	3.777910908400124e-07	-0.4766816913815845	8.162235614018827e-11	-0.6321614392342737	0.3466452239367405	-0.34498854545920143	0.8683717773709756	0.027944112582040104	181	758541.3125297227	0.36078579591779575	7	0.8442342912946209	False	34715437,34650632,34652984,34660780,34661045,34668358,34677439,34681528,34683190,34686075,34687450,34689247,34697305,34701126,34702435,34702658,34709016,34710504,34716048,34718026,34718678,34718690,34722115,34722255,34731767,34750363,34759937		20_34718690_C_CCTTT;			20_34759937_G_A;20_34750363_C_G;20_34722255_G_T;20_34722115_C_G;20_34718690_C_CCTTT;20_34718026_A_G;20_34716048_T_C;20_34710504_G_C;20_34709016_C_A;20_34702658_C_G;20_34702435_C_T;20_34701126_T_C;20_34697305_A_G;20_34689247_G_A;20_34687450_T_A;20_34686075_G_T;20_34683190_G_T;20_34681528_G_A;20_34715437_A_G;			0.1707920792079208	20	1	34679426	34820721			3.084238326732673
ENSG00000088387	ENSG00000088387	Q9BZ29-4	13_99665512_C_A	rs11620380	0.002600915731717516	0.0005778459626360582	1.0	6.235840084619693e-07	0.32789417268850723	0.005638749966294235	0.30829360061600064	0.0490934391219249	0.553606440027655	0.10388648488372812	0.21426967532007746	202	3622307.6121785324	0.17343811242529095	17	0.09735180574392274	False	99665512,99635611,99639173,99673134,99691185,99705827,99723081,99738554	13_99738554_G_A;				13_99723081_A_G;13_99705827_G_A;13_99691185_T_C;13_99673134_C_T;13_99639173_A_G;13_99635611_G_A;13_99665512_C_A;			0.12871287128712872	13	-1	99445741	99738879			2.058014366336634
ENSG00000088451	ENSG00000088451	O95455	13_95227340_C_T	rs3742107	1.541508554778156e-12	5.972601330113188e-14	1.0	3.593723178332817e-23	-0.6511079078625925	1.0029186142463015e-18	-0.6667483130308002	0.0551435384549972	-0.5248728827981983	0.0020448760203418113	-0.39805005973650864	94	497428.22414909507	0.27586718730012394	2	0.3579840365100874	False	95227340,95220009,95222544,95223903,95229288,95230624,95231981,95233607,95234223,95235175,95235890,95236963,95237460,95237526,95237793,95238465,95238466,95238470,95238884,95239005,95239068,95239427,95240054,95240291,95240430,95240561,95241307,95241568,95241573,95241634,95242282,95242352,95242386,95243270,95244087,95246440,95246883,95247626,95248905,95249017,95250102,95250609,95250671,95250777,952…		13_95242282_AACT_A;13_95239065_TGCAGGGGT_T;13_95239002_ATTATTTTT_A;13_95239002_ATTAT_A;13_95238464_CG_C;13_95230624_A_AAGTGGCAAACATATT;			13_95247626_T_C;13_95246883_C_T;13_95246440_C_T;13_95244087_T_C;13_95243270_G_A;13_95242386_C_G;13_95242352_G_A;13_95242282_AACT_A;13_95241634_C_T;13_95241568_G_C;13_95241307_G_A;13_95240561_T_C;13_95240430_C_T;13_95240291_C_A;13_95240054_G_A;13_95239068_A_G;13_95239065_TGCAGGGGT_T;13_95239005_A_C;13_95239002_ATTATTTTT_A;13_95239002_ATTAT_A;13_95238884_G_A;13_95238470_G_T;13_95238466_A_G;13_95238…			0.3415841584158416	13	-1	95226308	95248511			3.1188043118811875
ENSG00000088538	ENSG00000088538	Q8IZD9	3_51163964_C_A	rs9839484	0.033229413473030774	0.01082493944696765	1.0	0.00017992242885421308	0.21119822673827016	0.00027289767581921556	0.20344985787778536			0.700883745753458	-0.04917687428641149	158	789396.4468822145	0.5080325064525384	1	0.3940552246825983	False	51163964					3_51163964_C_A;			0.2079207920792079	3	1	50712672	51421629			1.7550193419668738
ENSG00000088756	ENSG00000088756	Q9P2N2	18_6718467_G_A	rs13381520	2.6304856344751593e-15	6.435344698645772e-17	1.0	7.135747833784656e-27	-0.8186214295464861	9.208810410248928e-23	-0.7181994441960399	0.00016189965458040782	-0.5063618758863575	0.0043560841537003455	-0.2975486143069703	202	1257773.4902077594	0.2647717672125388	5	0.4264067408937913	False	6718467,6686951,6689374,6689385,6713257,6713314,6713490,6713505,6713515,6713579,6714404,6715863,6716098,6716795,6718031,6719009,6719078,6719503,6719945,6719946,6720203,6720798,6721388,6723061,6723126,6723231,6723282,6723728,6723883,6723980,6724373,6724710,6724894,6725074,6725274,6725397,6725698,6725839,6726177,6726843,6727176,6728467,6728488,6728678,6728751,6728903,6729022,6729046,6729314,6730016…		18_6746934_G_GCACTGTATA;18_6738607_TA_T;18_6736577_TA_T;18_6736577_T_TA;			18_6755698_C_G;18_6749032_G_A;18_6748161_A_T;18_6747728_A_T;18_6747553_A_G;18_6746934_G_GCACTGTATA;18_6746406_T_G;18_6745713_A_G;18_6740785_T_C;18_6740452_T_G;18_6739875_C_T;18_6738607_TA_T;18_6736577_TA_T;18_6736577_T_TA;18_6736125_A_G;18_6734128_C_G;18_6733011_A_C;18_6730719_A_C;18_6730716_A_C;18_6730187_G_A;18_6730016_G_C;			0.4678217821782178	18	1	6729717	6915715			1.6975073396039604
ENSG00000088808	ENSG00000088808	Q96KQ4	14_104103481_T_G	rs12881418	0.05933565522294474	0.0215936500161694	1.0	0.00023343206527737148	0.26908748957521483	0.004224047230956332	0.4250966383152992	0.4053337960546794	0.21773227246912047	0.2844913224839506	0.11311970020722678	202	1481805.8373802304	0.1853566317063792	8	0.253620291467624	True	104103481,104102718,104105414,104109127,104115251,104124596,104126139,104130360,104132257,104137204,104137643,104138639,104147886,104148905,104150352,104150360,104153768,104154882,104157489,104162994,104166783,104168208,104168378,104179267,104186052								0.2153465346534653	14	-1	104200089	104313927			1.26145528019802
ENSG00000088832	ENSG00000088832	P62942	20_1336654_A_G	rs6131399	0.006227772131495685	0.0015629645464131574	1.0	5.3990626653767485e-06	0.4957973519404668	3.28400262773243e-05	0.5751754569577182	0.018100429521739042	0.4585313453865485	0.0016247398405505786	0.25498340433095823	202	22989424.04961044	0.18558350457834424	4	0.11387619804190832	True	1336654,1328462,1328831,1329179,1329821,1330465,1331699,1331775,1332066,1333878,1334695,1334751,1334922,1335023,1335663,1335691,1336106,1336619,1336843,1337567,1337741,1338126,1338166,1338233,1338457,1338903,1368389					20_1368389_T_A;			0.1113861386138614	20	-1	1349622	1373806			6.528278594059405
ENSG00000088833	ENSG00000088833	Q9UNZ2	20_1417876_C_T		4.4065607369326235e-13	1.5629028482858302e-14	1.0	9.691200661985095e-20	-0.6328589181446934	6.22342219852309e-13	-0.660977988285232	0.0005662287887126643	-0.2663822577256969	2.1644135595068298e-07	-0.3738578974002715	202	46217301.3048157	0.11627209019973395	23	0.17310821644450106	False	1417876,1411544,1412268,1413571,1414025,1414652,1415177,1416182,1416521,1419294,1420336,1420757,1421932,1422348,1422801,1423779,1424303,1426393,1428567,1430204	20_1426393_C_T;			20_1426393_C_T;20_1424303_G_A;20_1423779_C_T;	20_1430204_C_T;20_1428567_C_T;	20_1430204_C_T;20_1428567_C_T;20_1426393_C_T;20_1424303_G_A;20_1423779_C_T;		0.41336633663366334	20	-1	1422807	1454487	0.9682375801321541	20_1428567_C_T	3.5540005346534658
ENSG00000088882	ENSG00000088882	Q96SM3	20_2846397_G_A	rs555502	0.0008593169196065724	0.00016687425607249252	1.0	1.1092468738952107e-07	0.4463727206903589	4.473419569378376e-07	0.3973140313372863	0.2422658952539885	0.3434205232757589	0.2328908706869029	0.1216660048757684	192	596486.4487109602	0.3325493859629523	5	0.4600488860534426	False	2846397								0.30445544554455445	20	-1	2774715	2781283			4.691234217821782
ENSG00000088899	ENSG00000088899	O60299	20_3152793_T_C	rs6051617	0.02257944862563541	0.006858676013522636	1.0	2.5679074905226786e-05	-0.3823401714484214	0.006263230399401092	-0.3794374383440974	0.385221884819802	-0.2878097329801084	0.3024049838552821	0.1794890919602945	171	768591.3810546334	0.4436628002441626	3	0.5316751639756252	False	3152793,3149214,3150496,3152261,3153236,3153605,3155994,3157710,3161487,3162560,3165057,3165528,3167805,3168998,3172490,3173666					20_3153605_C_T;20_3153236_C_G;20_3152261_G_A;20_3150496_G_A;20_3149214_G_C;20_3152793_T_C;			0.1485148514851485	20	-1	3143263	3154192			3.4589647029702966
ENSG00000088992	ENSG00000088992	Q96BS2-3	12_117443591_C_T	rs7297848	0.002162333899856493	0.0004682567850561292	1.0	4.772160684757354e-07	0.6135932332261615	0.007799203299220565	0.3959052264257826	0.1714020212347702	0.3641351694022205	0.009202940498827007	0.3361097818449772	157	717266.5764160142	0.2977221482331868	3	0.2364321830910576	False	117443591,117349475,117350519,117352557,117353237,117354785,117360617,117361093,117361951,117362212,117362453,117363050,117363166,117363457,117363831,117363855,117364279,117364700,117366338,117368558,117369341,117370082,117373618,117374323,117374508,117382290,117383320,117384409,117385151,117386085,117388564,117389979,117390339,117390410,117391183,117392105,117394024,117396097,117396822,117398448…					12_117492864_A_G;	12_117492864_A_G;		0.1782178217821782	12	-1	117476728	117537284			1.8285608316831683
ENSG00000089006	ENSG00000089006	Q9Y5X3	20_18022362_G_T	rs6111803	0.01940717583456015	0.005740598540785847	1.0	2.556825032030174e-06	-0.6408980220941894	0.004776628570851592	-0.4599180619877803	0.28971737654184554	-0.3887841068149132	0.028605174943021207	-0.24947504179584	202	32586110.30536424	0.11415781673113125	22	0.1336994059237029	False	18022362,18021459,18021808,18021936,18022399,18022545,18023371,18025212,18025354,18028485,18028652,18029275,18029406,18030357,18031455,18032469,18032988,18035569,18041824,18047003,18048191,18051724,18052016,18052785,18054497,18055010								0.07673267326732673	20	-1	17922241	17949623			4.678809400990098
ENSG00000089022	ENSG00000089022	Q8IW41-2	12_112241552_T_A	rs2106696	0.01668926269067737	0.004817478847619149	1.0	5.050612343654791e-05	-0.5282219008047548	0.00660329631362905	-0.4210269778387232	0.014549373728341312	-0.7735595341360444	0.53865190418927	-0.07832777649210243	202	4300031.100132202	0.15121330921695286	8	0.18133691045114933	False	112241552,112098285,112121870,112241389,112241472,112244413,112245088,112250200,112250352,112256752,112258854,112261347,112266728,112282838,112295182,112297396,112298257,112299125,112309571,112318493,112321322,112345616,112353251,112359326,112374086,112379095,112399273,112407543,112414363,112416794,112423062,112436016,112436677,112437030,112440510,112440998,112446405,112453959,112455675,112459849…		12_112299125_TTTG_T;			12_112321322_A_G;12_112318493_T_G;12_112309571_T_C;12_112299125_TTTG_T;12_112298257_A_G;12_112297396_C_T;12_112295182_A_T;12_112282838_A_G;	12_112321322_A_G;12_112318493_T_G;12_112309571_T_C;12_112299125_TTTG_T;12_112298257_A_G;12_112297396_C_T;12_112295182_A_T;12_112282838_A_G;		0.09653465346534654	12	1	112279782	112334343			3.6561695742574263
ENSG00000089050	ENSG00000089050	O75884	20_18259316_G_T	rs76512765	0.007716123106303221	0.001996997329747913	1.0	5.7920882478497725e-06	0.5561658385179511	5.053506584244512e-06	0.5214662261389873	1.218058430107875	0.16595623710356655	0.16638333305322844	0.18625741216234729	202	2724012.3420668803	0.22144131612803256	5	0.1671868591511072	False	18259316,18271254								0.054455445544554455	20	-1	18467184	18477887			3.1471760940594065
ENSG00000089063	ENSG00000089063	Q96A57-2	20_5069335_A_T	rs4518035	1.7476490300327606e-16	3.5799904044917846e-18	1.0	8.586855604524606e-27	0.7843764946330828	6.29553753090158e-23	0.7964226375747085	1.1693966336532113e-09	0.4518095456473623	2.592256899966028e-13	0.483487471421289	202	3364562.6603378523	0.17006640009333776	2	0.1952473119849414	False	5069335,5055138,5055467,5056197,5056899,5058061,5058088,5058791,5059269,5059552,5061017,5061018,5061460,5061789,5062723,5062806,5063568,5063643,5064906,5065093,5065163,5066435,5066731,5067164,5067209,5067352,5067930,5068919,5069133,5069440,5069714,5069748,5069764,5070020,5070100,5070266,5071029,5071382,5071542,5071680,5071942,5071950,5072373,5072721,5073139,5074892,5075214,5075381,5075777,5076575…				20_5081049_T_A;				0.44801980198019803	20	-1	5080486	5093749	0.9712820007142584	20_5081049_T_C	5.499118821782178
ENSG00000089157	ENSG00000089157	F8VPE8	12_120636048_C_T	rs3742040	0.017294877508433924	0.005032783037102509	1.0	3.169459754312128e-06	0.4013064555584684	1.5377522653470411e-25	0.7007518930491944	0.9581717441347156	0.25571674764780805	0.05553365204716953	-0.4513481028607074	42	152530.72553647132	0.7285305455707672	1	0.8435443104197993	False	120636048,120567897,120571033,120571084,120573815,120576265,120578070,120579669,120581773,120584391,120586193,120587226,120589064,120589325,120589775,120591143,120591952,120594134,120596609,120596719,120598777,120600002,120600172,120602078,120603263,120607552,120608031,120610280,120612699,120613345,120613428,120614093,120615992,120617900,120618022,120618108,120618503,120619669,120622885,120625393…	12_120636549_C_A;	12_120635738_TA_T;12_120635737_TTA_T;	12_120636549_C_A;		12_120636549_C_A;12_120635847_G_T;12_120635738_TA_T;12_120635737_TTA_T;12_120636048_C_T;	12_120636549_C_A;12_120635847_G_T;12_120635738_TA_T;12_120635737_TTA_T;12_120636048_C_T;		0.09653465346534654	12	-1	120634489	120639038			9.092920782178219
ENSG00000089177	ENSG00000089177	Q96L93	20_16559255_G_A	rs6044142	7.896238929111558e-06	9.769781748883198e-07	1.0	9.087897034348864e-10	0.4253886453000705	3.998103814996225e-06	0.3483720849217651	0.2890206553515132	0.3285948848253002	0.996994957126438	0.06785230624386747	78	745667.1467910577	0.4082535335364542	1	0.5326416258764015	False	16559255,16545951,16552336,16553532,16555547,16556644,16557283,16557295,16557993		20_16553532_GC_G;			20_16553532_G_C;20_16553532_GC_G;20_16552336_A_G;20_16545951_T_C;			0.4356435643564357	20	-1	16252749	16554078			1.8846932425742573
ENSG00000089280	ENSG00000089280	P35637-2	16_31361988_G_A	rs4493054	0.03453232219494614	0.011326181293484616	1.0	5.057155129273718e-05	-0.2841987587230033	0.031809155532449195	-0.18854464587474484	2.2543632649121887	-0.1913524849702659	0.5717663025774429	-0.08123989662226272	202	128869854.9740819	0.17998449508573142	11	0.17830218318011914	True	31361988,31275374,31276937,31278991,31279536,31280255,31280282,31280661,31281751,31282713,31331160,31334682,31336519,31338938,31340909,31343243,31343653,31343769,31344681,31345280,31347557,31348233,31348848,31349040,31349164,31349321,31354366,31355328,31355360,31355657,31357810,31360892,31361643,31362590,31363977,31366016,31370090,31372081,31373682,31376105,31376173,31380596								0.31683168316831684	16	1	31191431	31203127			6.352680163366338
ENSG00000089335	ENSG00000089335	E7EVR1	19_35169540_C_A	rs2305762	0.0017361317053020554	0.0003649880068737553	1.0	9.434353181764911e-07	-0.4482193725555042	2.7388946201273525e-05	-0.4272672336691673	0.1690425195628085	-0.18709791031299086	0.22002352273378686	-0.14935417082237956	132	386037.8236342298	0.25094944789419543	1	0.3133359166816861	False	35169540					19_35169540_C_A;			0.2623762376237624	19	1	35168544	35177302			2.964081881188119
ENSG00000089351	ENSG00000089351	Q96CP6-3	19_35525253_T_C	rs67777826	0.005488758473996249	0.0013588580326000313	1.0	1.2325298594319411e-06	-0.1969755617044896	3.1873898706960918e-12	-0.5654316679784704	0.9544123238340244	-0.332327641175831	0.6153291604374981	-0.04103362832286584	202	7848695.319842298	0.20794264351465566	16	0.13719942158893614	False	35525253,35498890,35501795,35503025,35503642,35505591,35506622,35506729,35507016,35507073,35507234,35507374,35507524,35507531,35507568,35507586,35507734,35507763,35508399,35510504,35525322,35532314			19_35506729_G_A;	19_35506729_G_A;	19_35510504_A_G;19_35508399_C_T;19_35507763_C_T;19_35507734_G_A;19_35507586_C_T;19_35507568_G_T;19_35507531_A_G;19_35507524_G_T;19_35507374_A_G;19_35507234_T_C;19_35507073_A_G;19_35507016_C_T;19_35506622_G_T;19_35505591_G_A;19_35503642_C_T;19_35503025_C_T;19_35501795_G_A;19_35498890_C_T;	19_35510504_A_G;19_35508399_C_T;19_35507763_C_T;19_35507734_G_A;19_35507586_C_T;19_35507568_G_T;19_35507531_A_G;19_35507524_G_T;19_35507374_A_G;19_35507234_T_C;19_35507073_A_G;19_35507016_C_T;19_35506729_G_A;19_35506622_G_T;19_35505591_G_A;19_35503642_C_T;19_35503025_C_T;19_35501795_G_A;19_35498890_C_T;	19_35506729_G_A;	0.2698019801980198	19	1	35485688	35517375			4.81811091089109
ENSG00000089639	ENSG00000089639	Q9P107-2	19_19744452_C_T	rs7248200	0.021427623053378298	0.006431045945085093	1.0	2.8433316254531633e-05	0.3211130556732525	0.0017532036480880006	0.2679307380777073	3.978919021114688	0.1724961818435331	0.4390500408734044	0.0763049308962589	202	1989748.3728649062	0.2675495834963764	13	0.20848493013355948	False	19744452,19736683,19738554,19744358,19750824		19_19750824_AG_A;			19_19750824_AG_A;19_19744358_T_C;19_19744452_C_T;			0.4752475247524752	19	-1	19740285	19754476			2.5791128960396037
ENSG00000089685	ENSG00000089685	A0A0B4J1S3	17_76224933_G_C	rs4442885	1.6566188276939544e-08	1.2507540019461555e-09	1.0	1.1849649774257004e-14	-0.4974635146419206	3.7197157822782857e-13	-0.5362999037281508	1.2903834315417917	-0.08537272541890928	0.8493180253170067	0.015332258642890563	202	3875483.733454837	0.2095185801164557	6	0.37104666416522736	False	76224933,76210367,76212341,76214980,76216597,76216664,76216826,76217205,76218720,76221370,76221428,76222307,76222563,76223874				17_76221428_T_C;17_76221370_A_G;17_76210367_G_C;	17_76218720_A_T;17_76217205_A_G;17_76216826_G_A;17_76216664_A_G;17_76216597_T_C;17_76214980_A_G;17_76212341_A_G;	17_76218720_A_T;17_76217205_A_G;17_76216826_G_A;17_76216664_A_G;17_76216597_T_C;17_76214980_A_G;17_76212341_A_G;17_76210367_G_C;		0.38613861386138615	17	1	76210267	76221717			5.32293746039604
ENSG00000089847	ENSG00000089847	Q8TF21	19_4227195_A_G	rs8099905	0.011707930846934474	0.003211012755983551	1.0	4.873059544107102e-06	0.25368494906861944	9.855051591395526e-06	0.3261143446199754	0.17179782023997126	0.35071455573020804	0.08482307520511034	0.17240285574249947	133	814405.5114138601	0.4856790121303517	2	0.3951778118857836	False	4227195,4196490,4196822,4196845,4197562,4198154,4200156,4200206,4201033,4201805,4202336,4202429,4202793,4206770,4210017,4210382,4210810,4211704,4217587,4217956,4219282,4221265,4223829,4227154,4227327,4227664,4228538	19_4200156_G_A;	19_4197562_AGAAT_A;			19_4223829_G_A;19_4221265_G_T;19_4211704_C_T;19_4210382_C_T;19_4210017_G_A;19_4206770_T_C;19_4202793_A_G;19_4202429_C_T;19_4202336_C_T;19_4201805_G_T;19_4201033_C_A;19_4200206_A_G;19_4198154_C_T;19_4197562_AGAAT_A;19_4196845_G_C;19_4196822_C_A;19_4196490_A_G;	19_4206770_T_C;19_4202793_A_G;19_4202429_C_T;19_4202336_C_T;19_4201805_G_T;19_4201033_C_A;19_4200206_A_G;19_4200156_G_A;	19_4217956_A_G;19_4217587_G_A;19_4198154_C_T;	0.4232673267326733	19	1	4183351	4224811			2.1515110336633665
ENSG00000089876	ENSG00000089876	Q7L7V1	10_127532782_A_C		0.0018813192341681536	0.00039944858022354136	1.0	7.27446310761305e-07	-0.2664280170524295	0.00029381152552533467	-0.19402088433982195	0.04749477578776143	-0.3145052578920309	0.6065328131351004	-0.04938285177206714	194	1015495.45336725	0.2235257608986287	8	0.17836230825965	False	127532782,127520313,127520429,127522988,127525072,127528267,127531514,127531959,127534930,127536562,127538973,127539196,127546448,127550491,127554534,127563509,127564306,127568260,127572773,127589202,127590349,127596105,127596596,127598226,127600013,127601214,127607262,127616324,127620582,127621532,127634125,127641756,127642064,127642276,127642617,127642986,127643296,127643599,127646444,127647134…				10_127525072_A_C;	10_127572773_A_G;10_127568260_G_A;10_127564306_G_A;10_127563509_T_C;10_127554534_C_T;10_127550491_T_C;10_127539196_T_C;10_127538973_C_T;10_127536562_C_T;10_127534930_A_G;10_127531959_C_T;10_127531514_A_G;10_127528267_T_C;10_127532782_A_C;			0.4826732673267327	10	-1	127524906	127585005			3.102570168316832
ENSG00000089916	ENSG00000089916	Q9NWQ4-4	14_76672104_A_C	rs60135001	2.1809728824747265e-05	2.9818287799724687e-06	1.0	1.1784555096741227e-08	0.3938082015777339	1.132126703570887e-08	0.30887469893798125	0.0003845688207021224	0.6955432914818945	0.000266742390133866	0.5405751682174503	153	281733.61352252954	0.2164984885982605	2	0.49600612135184297	False	76672104,76605003,76606248,76614949,76627919,76628814,76629481,76632781,76635675,76639319,76641704,76656503,76665740,76683951,76685079,76689920,76694680				14_76672104_A_C;	14_76665740_C_T;14_76656503_T_G;14_76641704_G_A;14_76639319_A_G;14_76635675_G_C;14_76632781_T_G;14_76629481_C_T;14_76628814_C_T;14_76627919_T_C;	14_76665740_C_T;14_76656503_T_G;14_76641704_G_A;14_76639319_A_G;14_76635675_G_C;14_76632781_T_G;14_76629481_C_T;14_76628814_C_T;14_76627919_T_C;		0.14603960396039606	14	1	76618259	76720685			2.262222396039604
ENSG00000090054	ENSG00000090054	O15269	9_94826465_C_T	rs7860518	4.5918512694443534e-08	3.805490692691797e-09	1.0	2.1373299255309795e-15	0.8268690414520236	2.028519461156231e-14	0.7506101042506663	0.047760043610904426	0.33359417379587697	0.0005771827355793406	0.37748078805299023	202	25092023.18547228	0.10946917205469064	19	0.171709851224955	True	94826465,94698842,94722509,94792132,94824750,94829156,94830974,94839105,94839342,94840206,94850416,94852903,94860625,94861762,94864322,94864754,94870152,94877836		9_94861762_CTT_C;9_94852903_AC_A;9_94852902_AAC_A;			9_94870152_C_A;9_94864754_A_C;9_94864322_A_G;9_94861762_CTT_C;9_94860625_T_G;9_94852903_AC_A;9_94852902_AAC_A;9_94850416_T_C;9_94840206_T_C;9_94839342_A_G;9_94839105_T_C;9_94830974_T_C;9_94829156_A_G;9_94824750_C_T;9_94826465_C_T;			0.2103960396039604	9	-1	94794281	94877666	0.1661844530411625	9_94685210_A_C	4.365556836633663
ENSG00000090263	ENSG00000090263	Q9Y291	7_140758393_A_C	rs4726225	8.000562610058028e-06	9.926953490180859e-07	1.0	7.557950691278856e-11	0.4770768348369941	7.675966597765515e-09	0.6704975710610892	0.20527947321665446	0.3244776546913721	0.2803170363306475	0.1041333258986401	202	3106577.6095948108	0.18196509663934105	4	0.3394649733954728	True	140758393,140665521,140666965,140666985,140669703,140670902,140671636,140673399,140673434,140676153,140685653,140686639,140691762,140696374,140700991,140702682,140703735,140711717,140712618,140714248,140715025,140717743,140718960,140720940,140721096,140721368,140728694,140729936,140732507,140734768,140741144,140741526,140745149,140745341,140751388,140760785,140767992,140777030				7_140715025_G_C;	7_140714248_C_A;7_140712618_G_A;7_140711717_G_A;			0.20297029702970296	7	-1	140705854	140715028			3.8586003118811885
ENSG00000090372	ENSG00000090372	Q9NRL3	19_47249707_T_C	rs1693994	2.3134981619079341e-07	2.177282596481305e-08	1.0	3.820399044346554e-14	0.4949478343978148	2.994264260920733e-07	0.35704961102290844	0.01444192341935521	0.5474606566280213	0.2744761983455861	0.11412057145496712	202	18467021.11649176	0.10487949167861696	23	0.08983192451893234	False	47249707,47170644,47171044,47173627,47182975,47183416,47185505,47185919,47191699,47192422,47193850,47194309,47196424,47201550,47209041,47210859,47217914,47220927,47221129,47223543,47224317,47224484,47232223,47241217,47254540,47257804,47273579,47274214,47276210,47277816,47279197,47280789,47283203,47283403				19_47223543_T_C;19_47249707_T_C;	19_47241217_G_A;19_47232223_C_T;19_47224484_A_G;19_47224317_C_T;19_47249707_T_C;	19_47241217_G_A;19_47232223_C_T;19_47249707_T_C;		0.2599009900990099	19	-1	47222764	47250251			4.542869336633663
ENSG00000090432	ENSG00000090432	Q969V5	1_20834610_C_A	rs6700034	4.722390073428885e-11	2.294032401349628e-12	1.0	1.8874843477588367e-18	0.6694906536674875	1.3573144890331295e-18	0.6793280655309011	0.05058885964912728	0.38074939984262746	0.1311806823064019	0.19389423749287127	202	2575009.556012916	0.16056511685118138	8	0.14821518802249084	False	20834610				1_20834610_C_A;				0.15346534653465346	1	-1	20825943	20834654			3.4492084052097964
ENSG00000090487	ENSG00000090487	Q9NZD8	15_65244153_T_C	rs111072532	0.0002122924023907815	3.603230521674273e-05	1.0	2.290150732961429e-08	-0.4695272021163821	1.5682186241951728e-05	-0.356386154084969	0.4710598433765748	-0.17348453962471178	0.004724692509040125	0.2326087604903915	202	3391685.9564842344	0.15502470354668338	12	0.3043489699658869	False	65244153,65232669,65242260,65244217,65244224,65245209,65245936,65246317,65246321,65246801,65247086,65248688,65254889,65259805,65262030,65264986,65272561,65272892,65280748,65289423,65289775,65289817,65299473,65304660		15_65259805_CT_C;			15_65280748_G_A;15_65272892_C_A;15_65272561_G_A;15_65264986_C_T;15_65262030_T_G;15_65259805_CT_C;	15_65280748_G_A;15_65272892_C_A;15_65272561_G_A;15_65264986_C_T;15_65262030_T_G;15_65259805_CT_C;		0.3836633663366337	15	-1	65255362	65282648			4.484857084158416
ENSG00000090530	ENSG00000090530	Q8IVL5	3_189713488_A_T	rs1522931	0.0015129628308295855	0.0003141748872634537	1.0	4.177912022331736e-08	0.4461890132256442	1.7597634657906282e-07	0.4233439387341289	0.04593935908172481	0.4103963203925527	0.006435439118155747	0.25069197520527386	202	2258809.623040445	0.2886670287640715	16	0.2345840181297761	False	189713488,189701445,189701698,189701726,189713826,189714329,189714530,189714842,189714873,189715065,189715295,189715573		3_189714530_ATG_A;3_189701698_AT_A;			3_189715573_A_G;3_189715295_A_G;3_189715065_A_G;3_189714873_C_T;3_189714842_T_C;3_189714530_ATG_A;3_189714329_A_C;3_189713826_A_G;3_189701726_A_G;3_189701698_AT_A;3_189701445_C_T;3_189713488_A_T;			0.4653465346534654	3	-1	189674517	189840226			3.0016917425742577
ENSG00000090621	ENSG00000090621	Q13310-3	1_39833473_C_T	rs613511	0.046573877771315934	0.016333294838214038	1.0	2.45135789661231e-05	-0.28383082101895124	0.00863191594853409	-0.307119118430493	0.010990974106073184	-0.3001823632566916	0.0015304438437503006	-0.2407816202191606	202	65600818.86864089	0.10865726752388136	17	0.09718202533860122	False	39833473,39741520,39742869,39803567,39807018,39809284,39812434,39820138,39820926,39820963,39821681,39821737,39824718,39826005,39832407,39833503,39837627,39843958,39846267,39846489,39852142,39858947,39859478,39881040,39884433,39886773,39889677,39892774,39893093,39895460,39903129,39904612,39906267,39908506,39908726,39911001								0.3316831683168317	1	-1	40026488	40042462			5.375957659253197
ENSG00000091073	ENSG00000091073	Q86UW9-2	7_76137375_C_T	rs2110464	0.03353458188666561	0.010932203038085416	1.0	1.5081052610502076e-05	0.2221987096829071	1.5074997412346335e-20	0.8545354069391946	0.007377401906547506	0.2540534149463076	0.012964783774848884	0.18068623918254506	202	2245895.900427359	0.2351284612655925	5	0.21061399011770468	False	76137375,76052091,76056562,76058767,76060235,76130832,76131061,76131650,76131812,76132270,76132397,76132473,76132898,76134236,76134433,76135134,76135677,76135821,76135921,76135948,76136719,76137924,76138835,76138845,76138967,76139115,76139384,76139395,76139453,76142536,76142872,76142930,76143705,76144156,76144483,76173528,76174518,76178113,76182731,76193193,76197643,76197678,76198932,76200250,762…	7_76131650_G_A;			7_76135134_G_A;7_76132270_C_A;	7_76134433_C_A;7_76134236_C_T;7_76132473_C_A;7_76132397_A_G;7_76132270_C_A;7_76131812_C_G;7_76131061_C_T;7_76130832_G_C;	7_76132270_C_A;7_76131812_C_G;7_76131650_G_A;7_76131061_C_T;7_76130832_G_C;	7_76132898_T_C;7_76131650_G_A;	0.4282178217821782	7	1	76090993	76135312			2.7556402772277226
ENSG00000091129	ENSG00000091129	C9JYY6	7_107828034_G_A	rs427592	1.1697786040652243e-10	6.0933100644858345e-12	1.0	1.9413741106757748e-16	0.5650542360303209	9.268833717718669e-12	0.4858295226851581	0.00508530279997336	0.4621480632731385	0.5970340144737758	0.07679511393554593	167	350108.0072469636	0.435014819529076	4	1.3945693578314602	False	107828034,107805558,107809412,107809666,107809927,107822198,107822396,107822636,107822686,107823633,107823680,107823854,107824678,107824889,107825108,107825218,107825589,107825940,107826067,107826213,107826474,107826610,107826909,107826939,107827117,107827495,107828035,107828143,107828184,107828353,107828471,107828535,107828938,107829860,107830677,107830991,107831458		7_107827495_TAC_T;7_107827494_GTA_G;7_107825939_GG_G;7_107823854_C_CTCTA;	7_107824678_A_G;		7_107831458_G_T;7_107830991_C_T;7_107830677_C_T;7_107829860_G_C;7_107828938_G_A;7_107828535_G_A;7_107828471_A_C;7_107828353_C_T;7_107828184_G_A;7_107828143_C_T;7_107828035_T_A;7_107828034_GT_AA;7_107827495_TAC_T;7_107827494_GTA_G;7_107827117_G_T;7_107826939_T_C;7_107826909_T_G;7_107826610_C_G;7_107826474_C_T;7_107826213_C_T;7_107826067_C_G;7_107825940_G_A;7_107825939_GG_G;7_107825589_C_T;7_107825…		7_107824889_C_G;	0.18564356435643564	7	-1	107788068	108097161			1.396985910891089
ENSG00000091140	ENSG00000091140	P09622	7_107556623_C_T	rs10271385	0.013790299611895008	0.003875747321568525	1.0	1.8665410881764845e-05	0.3999255334455478	0.05252920804278911	0.2692389518532429	0.8930243851421925	0.3203895348135517	0.04365217873207046	0.2466410385002149	202	80652607.47880596	0.09107571121785454	19	0.10654077528172494	True	107556623,107498837,107498862,107498957,107499355,107499359,107499451,107499478,107499598,107499691,107499713,107499721,107502595,107502963,107504536,107505814,107506202,107508175,107509363,107512584,107514719,107515931,107518938,107524071,107524548,107524713,107524975,107525846,107526170,107526326,107526800,107531203,107532888,107539129,107544317,107546937,107547002,107556739,107561943,107562090…					7_107562266_A_G;7_107562090_C_G;7_107561943_A_T;7_107556739_A_G;7_107547002_G_C;7_107546937_A_G;7_107544317_A_G;7_107539129_G_A;7_107532888_C_T;7_107556623_C_T;	7_107562266_A_G;7_107562090_C_G;7_107561943_A_T;7_107556739_A_G;7_107547002_G_C;7_107546937_A_G;7_107544317_A_G;7_107539129_G_A;7_107532888_C_T;7_107556623_C_T;		0.14356435643564355	7	1	107531415	107572175			4.405855504950495
ENSG00000091157	ENSG00000091157	Q9Y4E6-2	18_54693858_G_T	rs62100201	0.001204153188474297	0.000242578442861321	1.0	5.118175135010959e-10	-0.34179104580962216	1.2518460261675135e-07	-0.250989640279554	0.3097415743740488	-0.6660220618671571	0.5734266282203345	-0.05887231257331416	202	6859446.341033395	0.12754922619831371	33	0.1731464873594432	False	54693858,54692213,54694561,54701235,54701440,54701767,54702233,54702309,54702677,54702678,54702725,54703459,54703464,54706016,54714844		18_54694561_A_ACGGC;		18_54694561_A_ACGGC;	18_54692213_T_C;18_54693858_G_T;			0.33663366336633666	18	1	54318574	54698828			1.9380427673267326
ENSG00000091409	ENSG00000091409	P23229-5	2_173244730_G_A	rs4972814	0.003404819365302777	0.0007851450485364008	1.0	3.6795533095515694e-07	-0.2879376789551291	5.384842294323451e-06	-0.2862219444773367	0.019510109019359043	-0.4934634625971377	0.01455146096016987	-0.19068410951787265	202	31338577.24855528	0.15526750860863076	40	0.13076723731909884	True	173244730,173228629,173229089,173237175,173240323,173241753,173244994,173245726,173245806,173246768,173247503,173247937,173249964,173250044,173250267								0.4851485148514851	2	1	173292082	173371181			5.353266172811584
ENSG00000091527	ENSG00000091527	Q9UKY7	3_133507119_G_T	rs13321680	0.01807357485335021	0.005286885585686782	1.0	1.2601270554703826e-05	-0.2597834061747073	0.0026993387878851364	-0.2253050052524241	0.09138786353835678	-0.13391656252156636	0.1675915448874698	0.08785099612158742	202	30197168.45126358	0.13869470192073827	12	0.19836112326293454	False	133507119,133508300,133510413,133514190,133515796,133519981,133522504,133526403,133530432,133530647,133536655								0.405940594059406	3	1	133292574	133309105			5.579119962173602
ENSG00000091542	ENSG00000091542	Q6P6C2	17_18043106_G_A	rs860567	0.0039853883144303735	0.0009395495803889467	1.0	1.0781369965075458e-06	0.3786974343961786	7.745044540561178e-05	0.2288235704051577	1.4752882390593776	0.2330647316399441	0.5610708269124176	0.04511512886598612	202	4269487.476668295	0.11809165766961086	12	0.16387604191639496	False	18043106,18057167,18058521,18059494,18060192,18062443,18063782,18064969,18071212,18071881,18071890,18073316,18073938,18075900,18079075,18081615,18092477,18092509,18093757,18093877,18096391,18096846,18097603,18099962,18102578,18104223,18104300,18104322,18108400,18110681,18111822,18113441,18114912,18121755,18124513,18124908,18125326,18125471,18128474		17_18111821_TG_TGTTTTTT;17_18110681_GA_G;17_18104322_CCA_C;17_18093752_TACTCGG_T;		17_18111821_TG_TGTTTTTT;	17_18110681_GA_G;17_18110681_G_A;17_18108400_C_T;17_18104322_CCA_C;17_18104300_A_G;17_18104223_G_A;17_18102578_A_G;17_18099962_A_G;17_18097603_G_A;17_18096846_G_A;17_18096391_C_G;17_18093877_A_G;17_18093757_G_A;17_18093752_TACTCGG_T;17_18092509_G_A;17_18092477_G_T;			0.4158415841584158	17	1	18086392	18113268			4.801261405940594
ENSG00000091640	ENSG00000091640	O75391	17_4852463_C_T	rs4790714	0.07066263169448439	0.0268809267091165	1.0	3.062247458083315e-05	0.2560663829243929	0.0012274077072060492	0.3229888811589653	0.6001041459933611	0.1964514748272843	0.0933615265454415	0.12570349987579288	202	16510931.51691326	0.15954985045030062	9	0.12885473206369275	False	4852463,4825387,4828221,4828530,4829560,4831790,4833478,4835217,4856376								0.34405940594059403	17	-1	4862521	4871167			4.579128801980198
ENSG00000091651	ENSG00000091651	Q9Y5N6	16_46602819_C_T	rs12934443	0.02220948437896329	0.0067176995944330025	1.0	0.0002176171753865493	-0.2313674160512642	0.07073684084252788	-0.20178047742785005	0.05653073404998867	-0.2422094056998354	0.009072909896134426	-0.1926316035172113	202	5564156.895695963	0.10934846795223337	9	0.17277757910664027	True	46602819,46441560,46443081,46445274,46446556,46489202,46524587,46638788,46648358,46703456,46710869,46723598,46743355,46749203,46752434,46765715				16_46723598_T_C;		16_46723598_T_C;		0.4356435643564357	16	1	46723555	46732306			3.934133569306931
ENSG00000091947	ENSG00000091947	Q96IK0	17_42114672_T_C	rs2285750	0.0828927329804935	0.03258454186945359	1.0	8.842161612540994e-05	-0.3241925348537215	0.0005823659897202286	-0.396298984468334	0.9031946389650046	0.02249734984525309	0.9962408598877948	0.0007656126677515472	94	455816.3705977911	0.21461885420171034	1	0.37385593356828795	False	42114672,42082681,42127701,42129925,42132753,42139654,42149944								0.0891089108910891	17	-1	42088556	42101314			3.078088603960396
ENSG00000091972	ENSG00000091972	U3KQG5	3_112105134_A_T	rs1488264	0.03712128707583496	0.012418663053112056	1.0	3.963825500452172e-05	0.2625963567616651	2.733545162751259e-07	0.4532423010175389	0.0007176055144792046	0.3006403509888079	0.0005299786142390849	0.2632547204069311	201	1687294.875345519	0.2375583867492065	3	0.21376118856617896	False	112105134								0.4084158415841584	3	1	112051194	112081659	0.263062170045723	3_112076086_G_C	4.302235881070066
ENSG00000092020	ENSG00000092020	Q969Q6	14_35590821_C_G	rs11851907	8.979625831362492e-28	1.6817747079690962e-30	1.0	6.5767650610638695e-43	1.1097054461644034	1.6016921057630143e-26	0.8499991375724169	0.6675232246185174	0.3797270432098032	0.8982684991497629	0.014582883213100084	184	408667.2223101577	0.20096059968734709	5	0.2873480707363843	False	35590821,35523548,35524570,35525365,35527239,35528193,35532203,35532970,35533748,35533950,35539882,35542146,35546797,35556089,35556842,35560539,35563079,35563211,35573429,35582138,35588296,35588551,35591174,35591726,35593599,35596284,35597149,35597339,35598370,35599690,35599923,35602273,35604985,35605465,35605570,35619614,35622938,35623906,35625068,35625608,35626784				14_35591174_T_C;	14_35588296_A_C;14_35582138_A_G;14_35573429_T_G;14_35563211_T_C;14_35563079_C_A;14_35560539_T_A;14_35556842_A_G;14_35556089_T_C;14_35590821_C_G;	14_35591174_T_C;14_35588296_A_C;14_35582138_A_G;14_35573429_T_G;14_35556842_A_G;14_35556089_T_C;14_35590821_C_G;		0.3762376237623761	14	-1	35554673	35591723			3.0182308663366344
ENSG00000092036	ENSG00000092036	Q9H6D7	14_23372913_G_A	rs12437151	7.985886614624935e-09	5.739593095375992e-10	1.0	3.1850880227017973e-18	-0.6170202880501794	1.005127858561173e-18	-0.7603671042847506	0.18088951762958547	-0.3953962262962441	0.15772814756381726	0.1141575088736948	202	6555102.749735876	0.3684553187232771	16	0.2637193046641413	False	23372913,23373986,23374435,23374862,23375145,23375809,23376091,23376315,23376678,23377246,23379841,23380850,23381413,23381697,23381980,23382032,23385649,23386280,23386682,23386875,23387585,23387628,23388326,23388382,23388794,23388871,23389304,23391015,23391086,23391533,23394007,23394069,23394699,23396511,23396600,23396680,23398153,23398902,23398990,23399096,23399790,23400059,23400744,23400822,234…		14_23420382_TG_T;		14_23426182_C_A;	14_23426182_C_A;14_23425041_T_C;14_23422453_A_G;14_23421096_A_G;14_23420383_G_T;14_23420382_TG_T;14_23420153_T_C;14_23419167_A_G;14_23419036_C_T;14_23418724_C_T;14_23418648_G_C;14_23417792_C_T;14_23416252_C_G;14_23416138_A_G;	14_23421096_A_G;14_23420383_G_T;14_23420382_TG_T;14_23420153_T_C;14_23419167_A_G;14_23419036_C_T;14_23418724_C_T;14_23418648_G_C;14_23417792_C_T;14_23416252_C_G;14_23416138_A_G;		0.3935643564356436	14	-1	23415437	23426370			3.5533774900990105
ENSG00000092068	ENSG00000092068	Q9UHI5	14_23630841_A_G	rs2180397	0.0015221454437441882	0.00031661623007531577	1.0	6.535054277913814e-07	-0.6343039571933993	7.251349745486313e-06	-0.4300397881657786	0.0017795106644950469	-0.9109666565940802	2.446947884080983e-05	-0.5039832514728277	202	2982351.427892712	0.3247365768285244	6	0.2958372398746772	True	23630841,23630102,23630698,23631808,23632204,23632506		14_23630698_ACT_A;14_23630697_AAC_A;			14_23632506_A_G;14_23632204_A_G;14_23631808_T_A;14_23630698_ACT_A;14_23630697_AAC_A;14_23630102_T_G;14_23630841_A_G;			0.150990099009901	14	-1	23594504	23652883	0.9999999999999996	14_23630841_A_G	5.435763896039605
ENSG00000092094	ENSG00000092094	Q9NPF4	14_20922994_C_A	rs3120064	2.974704199927498e-14	8.670272103265212e-16	1.0	2.5444859170511748e-20	-0.6689229106349734	2.731141817656577e-21	-0.9388663395506152	6.490243840292017e-08	-0.6072973156159667	2.36370364489312e-10	-0.6270286322311271	202	9104034.180227887	0.14676403865052326	15	0.10811845316751227	False	20922994,20909354,20909816,20911055,20913075,20914136,20914598,20916705,20916716,20923007				14_20923007_C_A;14_20922994_C_A;	14_20916716_G_C;14_20916705_T_C;			0.2747524752475248	14	-1	20914570	20923264	0.9638315577410022	14_20916716_G_C	2.563186099009901
ENSG00000092108	ENSG00000092108	H0YJS6	14_31000949_A_T	rs229218	3.376163867836954e-07	3.2998909395339536e-08	1.0	3.4210930467738167e-12	0.4690156160319899	0.0004811327008586415	0.4133362696906306	0.011641897131094887	0.37183746301659903	0.5925716772906656	0.2080276500475513	52	132469.3618844552	0.7076974980522622	1	0.575228007920175	False	31000949,31004019,31004226,31004351,31008191,31008696,31009261,31017058,31018966,31021156,31027267,31029185,31029291,31032470,31039377,31040087,31045181,31045596,31047609,31049409,31050215,31050517,31051801,31057986,31068345,31069204,31077861,31078502,31079679,31079821,31079890,31080799,31081051,31083748,31089772,31091758,31093835,31093979,31094515,31094925,31099738,31100685,31103012,31103434,311…	14_31099738_A_G;	14_31193218_C_CA;14_31177736_TA_T;14_31117745_TG_T;14_31094925_GTA_G;		14_31099738_A_G;	14_31197026_T_C;14_31194991_G_A;14_31194949_A_G;14_31194622_T_A;14_31193218_C_CA;14_31193218_C_T;14_31190645_A_G;14_31188414_A_G;14_31186831_T_C;14_31186497_T_C;14_31182989_C_G;14_31178217_G_A;14_31177736_TA_T;14_31171830_C_T;14_31170812_T_G;14_31161417_A_G;14_31153130_G_A;14_31152826_A_G;14_31147264_A_G;14_31146283_G_A;14_31140202_C_A;14_31139349_G_C;14_31134714_T_C;14_31133994_A_G;14_31131005_G…	14_31197026_T_C;14_31194991_G_A;14_31194949_A_G;14_31194622_T_A;14_31193218_C_CA;14_31193218_C_T;14_31190645_A_G;14_31188414_A_G;14_31186831_T_C;14_31186497_T_C;14_31182989_C_G;14_31178217_G_A;14_31177736_TA_T;14_31171830_C_T;14_31170812_T_G;14_31161417_A_G;14_31153130_G_A;14_31152826_A_G;14_31147264_A_G;14_31146283_G_A;14_31140202_C_A;14_31139349_G_C;14_31134714_T_C;14_31133994_A_G;14_31131005_G…		0.3316831683168317	14	1	31091318	31205018			3.734058514851485
ENSG00000092140	ENSG00000092140	G3V483	14_31199109_C_G	rs10136727	0.004499913725237579	0.0010821773210336265	1.0	2.231613287825411e-05	-0.2615644701372501	0.123722180472544	-0.23794706250988096	0.6631969160873327	-0.3196475530007813	0.7214463798151702	-0.035211208017586926	202	2735026.0585588533	0.1755921412614598	11	0.4607476100271559	False	31199109,31000470,31001151,31004428,31005035,31011518,31014160,31015546,31016552,31021156,31026322,31040087,31059969,31080800,31085088,31095542,31138219,31147498,31153190,31172253,31177892,31178086,31183168,31196960,31204433					14_31085088_C_T;14_31080800_T_G;14_31080799_CT_TG;14_31059969_G_A;14_31040087_T_C;	14_31080800_T_G;14_31080799_CT_TG;		0.2945544554455445	14	1	31028329	31089269			3.711055920792079
ENSG00000092203	ENSG00000092203	O94842-3	14_21950836_T_G	rs6571850	7.039874212772307e-05	1.09306213586837e-05	1.0	1.6369371369870917e-08	0.3753337216548084	9.379052887016646e-06	0.2882750412576394	0.0029135261907252625	0.4098250274110402	0.94310483609837	-0.0063204737689148685	202	8300793.171629467	0.17415223321396006	8	0.10050513036510256	False	21950836,21951142,21951546,21955930,21958985,21959550,21960408,21977316		14_21958985_CTTGT_C;14_21958984_AC_A;			14_21960408_A_G;14_21959550_A_G;14_21958985_C_T;14_21958985_CTTGT_C;14_21958984_AC_A;14_21955930_G_A;14_21951546_C_T;14_21951142_A_C;14_21950836_T_G;	14_21960408_A_G;14_21959550_A_G;14_21958985_C_T;14_21958985_CTTGT_C;14_21958984_AC_A;14_21955930_G_A;14_21951546_C_T;14_21951142_A_C;14_21950836_T_G;		0.3316831683168317	14	1	21944756	21967319			3.4460650643564357
ENSG00000092208	ENSG00000092208	O14893	14_39514231_T_A	rs1884384	1.0929998309370377e-11	4.797786920301874e-13	1.0	9.819688568688246e-20	0.7181905429500063	2.397072887879367e-06	0.5262660188446121	0.00028684031198989666	0.4493899772094408	0.0024998994208202396	0.26634235912684834	202	3807587.5735668316	0.19287898629754488	10	0.2927536246180562	True	39514231,39531992,39552484,39556185,39562729,39563302,39577010,39582295,39583481				14_39583481_A_G;				0.16336633663366334	14	1	39583427	39606177			3.404411782178218
ENSG00000092439	ENSG00000092439	H0YLN8	15_50960620_T_C	rs62017210	0.025621726816192042	0.00796573878307457	1.0	9.429945863217776e-06	0.2560942636368549	0.0010939197523783452	0.2061847637097742	1.8957118975871607	0.2962258521313479	0.2860443112905854	0.10566419381590307	202	3250241.005253379	0.24254250607948424	13	0.4006698373437366	False	50960620,50809669,50825266,50827092,50827108,50827290,50827720,50828995,50829980,50830043,50833113,50836243,50837618,50837812,50838236,50839272,50840057,50840955,50841053,50842022,50842052,50842472,50844314,50845018,50845101,50845236,50845796,50847401,50847745,50848370,50848382,50849399,50850558,50850562,50851057,50851255,50851558,50853232,50854029,50854184,50854193,50854926,50857431,50857452,508…		15_50957590_TA_T;15_50922459_GATATAA_G;15_50918995_TAA_T;15_50916575_GATTTAC_G;15_50915605_CA_C;15_50911865_AT_A;15_50911672_AC_A;15_50910809_TAAAC_T;15_50910805_TAAATAAAC_T;15_50910801_TAAATAAATAAAC_T;15_50901929_TA_T;15_50900550_CTGTCTTTTATTTATTTCTAGACTTTTA_C;15_50888757_TA_T;15_50880594_ATTAAG_A;15_50873696_GA_G;15_50863776_GA_G;15_50854029_TA_T;15_50853232_TA_T;15_50851057_TC_T;		15_50853232_TA_T;	15_50977228_G_A;15_50974505_A_G;15_50974196_G_A;15_50972497_G_A;15_50969728_A_G;15_50968906_A_C;15_50968756_T_C;15_50966973_G_A;15_50965846_T_C;15_50964192_G_A;15_50959677_C_T;15_50958998_C_G;15_50957625_C_G;15_50957590_TA_T;15_50956834_C_G;15_50956432_G_C;15_50955626_A_G;15_50952055_C_T;15_50951872_C_T;15_50951172_G_C;15_50950970_T_C;15_50950590_C_T;15_50950141_T_C;15_50946815_A_G;15_50944066_G_…			0.3836633663366337	15	-1	50844670	50979012			3.161221876237623
ENSG00000092445	ENSG00000092445	H0YNK6	15_41853106_C_G	rs35679807	0.022599747650453708	0.006867487404960533	1.0	1.940973293304521e-05	-0.3586661898726681	0.00044405072950112	-0.2659513664606392	0.2169654128004097	-0.8182511726614523	0.4542187657782872	-0.08898245515292791	202	2368108.915218593	0.15113910938326114	12	0.2285551445640332	False	41853106,41848310,41855729,41859470,41860073		15_41859732_CTAGGTAAGGGATGCATAGAGCAGAGCGGGTGGGCAGGGCTGGAGCCGGGAAGGGGGCCGTGTTGGCTGGAGTTCTGAATGGTGCTGGTAGAGATGGAGGTTCAGGCATCATTCGGCAAACATTTACTGCATATAACTACATACCACCTTGTAAGTAGTTCTTGTAGGTGGAACAGATAAGCAAACTGGAAAAGATCAGATAATGTGGTTGATAAAGAGTGTCCCCAGGTGGTTAAGGAAACCCCCCCTAAAAAGGTCTGAAGGATAAAGATCTGAAGGATCTGGGATCTGAACGATAAAGAAGAAGCCATGTAAATATCTGGGGGAAAATCACTGCCGGAAGAAGGCACAGCAAGTGCAAAGACCCTATGACAGGAACTTGCTTGG…	15_41859732_CTAGGTAAGGGATGCATAGAGCAGAGCGGGTGGGCAGGGCTGGAGCCGGGAAGGGGGCCGTGTTGGCTGGAGTTCTGAATGGTGCTGGTAGAGATGGAGGTTCAGGCATCATTCGGCAAACATTTACTGCATATAACTACATACCACCTTGTAAGTAGTTCTTGTAGGTGGAACAGATAAGCAAACTGGAAAAGATCAGATAATGTGGTTGATAAAGAGTGTCCCCAGGTGGTTAAGGAAACCCCCCCTAAAAAGGTCTGAAGGATAAAGATCTGAAGGATCTGGGATCTGAACGATAAAGAAGAAGCCATGTAAATATCTGGGGGAAAATCACTGCCGGAAGAAGGCACAGCAAGTGCAAAGACCCTATGACAGGAACTTGCTTGG…		15_41860073_A_G;15_41859732_CTAGGTAAGGGATGCATAGAGCAGAGCGGGTGGGCAGGGCTGGAGCCGGGAAGGGGGCCGTGTTGGCTGGAGTTCTGAATGGTGCTGGTAGAGATGGAGGTTCAGGCATCATTCGGCAAACATTTACTGCATATAACTACATACCACCTTGTAAGTAGTTCTTGTAGGTGGAACAGATAAGCAAACTGGAAAAGATCAGATAATGTGGTTGATAAAGAGTGTCCCCAGGTGGTTAAGGAAACCCCCCCTAAAAAGGTCTGAAGGATAAAGATCTGAAGGATCTGGGATCTGAACGATAAAGAAGAAGCCATGTAAATATCTGGGGGAAAATCACTGCCGGAAGAAGGCACAGCAAGTGCAAAGACCCTATG…	15_41860073_A_G;15_41859732_CTAGGTAAGGGATGCATAGAGCAGAGCGGGTGGGCAGGGCTGGAGCCGGGAAGGGGGCCGTGTTGGCTGGAGTTCTGAATGGTGCTGGTAGAGATGGAGGTTCAGGCATCATTCGGCAAACATTTACTGCATATAACTACATACCACCTTGTAAGTAGTTCTTGTAGGTGGAACAGATAAGCAAACTGGAAAAGATCAGATAATGTGGTTGATAAAGAGTGTCCCCAGGTGGTTAAGGAAACCCCCCCTAAAAAGGTCTGAAGGATAAAGATCTGAAGGATCTGGGATCTGAACGATAAAGAAGAAGCCATGTAAATATCTGGGGGAAAATCACTGCCGGAAGAAGGCACAGCAAGTGCAAAGACCCTATG…		0.12871287128712872	15	1	41849873	41871536			4.310036173267327
ENSG00000092758	ENSG00000092758	Q14050	20_61455443_T_C	rs6010753	0.014058064965534977	0.003964166979044101	1.0	6.00623654237518e-06	-0.3079181353113597	4.336763720259149e-05	-0.3808055699309366	0.27498495163176284	-0.14976745129131513	0.021631136547196242	-0.2770892277093436	124	856637.4423985174	0.4646019286721361	1	0.691621835696803	False	61455443,61458547,61458883,61460053,61460338,61463501,61465531			20_61463501_T_C;		20_61465531_G_T;20_61463501_T_C;20_61460338_C_T;20_61460053_A_G;20_61458883_A_G;20_61458547_A_T;20_61455443_T_C;			0.405940594059406	20	1	61447596	61472511			4.307087004950495
ENSG00000092820	ENSG00000092820	P15311	6_159185563_T_A		0.06787732536425145	0.025536430261114847	1.0	1.5575038569980037e-05	0.1801090808126886	0.00023553060351346757	0.18829379628606008	0.2244166085207029	0.21261162345289847	0.10292126456874276	0.10649792650470953	202	141232840.88870525	0.16452482799107848	28	0.17228109567420732	True	159185563,159188128,159190019,159190184,159192045,159192919,159261199					6_159192919_G_T;6_159192045_A_G;6_159190184_G_A;6_159190019_T_G;6_159188128_A_G;			0.2871287128712871	6	-1	159186773	159240444			6.686434049504951
ENSG00000092847	ENSG00000092847	Q9UL18	1_36577664_A_G	rs274138	0.006898020709032038	0.0017658868419352766	1.0	2.2208012417336624e-05	-0.3149126483289768	1.3979779100121509e-05	-0.2875251944311064	0.039042975724806535	-0.5975484963279387	0.199084127327304	-0.2320031396716528	202	13244412.74376825	0.11807205199902655	29	0.10654641310139458	False	36577664,36565584,36568236,36568978,36569240,36574023,36574912,36577945,36579763,36580554,36581792,36581978,36582925,36584725								0.08415841584158416	1	1	36335409	36395211			3.471383430716826
ENSG00000092871	ENSG00000092871	Q8WZ73	17_33386131_A_G	rs813881	4.081628378224011e-15	1.0367708744874287e-16	1.0	3.0369814590479275e-22	-0.7009687552153954	9.514863885825107e-15	-0.7119996076783218	0.5594204380074794	0.1376173711679063	0.9341349510544972	0.01030768214466038	106	167121.06173329448	0.3574743384115403	2	0.5861219934972262	False	33386131,33322322,33330150,33341834,33353332,33368056,33371895,33382700,33405262,33411428,33411684,33416322		17_33416322_GCCGGC_G;17_33382699_AC_A;		17_33416322_GCCGGC_G;	17_33411684_A_G;17_33411428_T_C;17_33405262_C_T;17_33382700_C_A;17_33382699_AC_A;17_33368056_A_C;17_33353332_T_C;17_33341834_T_C;17_33386131_A_G;	17_33411684_A_G;17_33411428_T_C;17_33405262_C_T;17_33382700_C_A;17_33382699_AC_A;17_33368056_A_C;17_33353332_T_C;17_33386131_A_G;		0.4628712871287129	17	-1	33333009	33416338			2.1297335643564357
ENSG00000092964	ENSG00000092964	A0A1C7CYX9	8_26549373_C_A	rs71553815	0.006678116273863181	0.0016986476253195238	1.0	3.8109239867849176e-07	-0.3738578389050561	5.633416389210986e-06	-0.3371500924561002	0.00030732673244285893	-0.5357047702486426	4.647699460346987e-06	-0.5125946857775103	202	161433935.08274952	0.17232970222198146	26	0.11344577326440301	False	26549373								0.09653465346534654	8	1	26371791	26515694	1.0	8_26549373_C_A	4.979907237623763
ENSG00000093000	ENSG00000093000	Q9UKX7	22_45560641_T_C	rs132852	0.0822499784584044	0.03228188900515392	1.0	1.6467390758576965e-05	-0.3076891188205144	1.7995955785615132e-43	-1.1875003823401502	0.10666472625065364	-0.3246806128889621	0.004037566493302479	-0.3114449217005011	202	51383883.98250664	0.08297169590561568	33	0.13789392032620412	False	45560641,45536426,45538442,45547814,45548053,45548617,45549032,45554024,45555298,45555829,45556053,45556208,45556668,45558389,45562735,45563409,45563725,45564427,45564776,45564936,45565318,45565915,45566222,45566413,45566500,45566702,45566843,45566912,45567035,45567054,45567102,45567138,45567580,45567983,45568511,45568986,45570114,45570556,45575468,45576863,45577110,45577231,45580591,45584586		22_45580591_CTTAAAG_C;22_45580590_CCTTAAA_C;22_45570556_C_CATGAATCA;22_45567102_C_CAG;22_45567054_CAT_C;22_45566222_ACC_A;	22_45567054_CAT_C;22_45560641_T_C;	22_45580591_CTTAAAG_C;22_45580590_CCTTAAA_C;22_45567054_CAT_C;22_45567035_C_T;22_45566912_C_A;	22_45577110_T_C;22_45575468_A_G;22_45570556_C_CATGAATCA;22_45570556_C_A;22_45570114_G_A;22_45568986_A_G;22_45568511_G_T;22_45567983_A_G;22_45567580_C_A;22_45567138_T_C;22_45567102_C_CAG;22_45567054_CAT_C;22_45567035_C_T;22_45566912_C_A;22_45566843_A_G;22_45566702_C_T;22_45566500_G_A;22_45566413_T_C;22_45566222_ACC_A;22_45565915_T_G;22_45565318_A_C;22_45564936_C_T;22_45564776_A_C;22_45564427_A_C;2…	22_45570556_C_CATGAATCA;22_45570556_C_A;22_45570114_G_A;22_45568986_A_G;22_45568511_G_T;22_45567983_A_G;22_45567580_C_A;22_45567138_T_C;22_45567102_C_CAG;22_45567054_CAT_C;22_45567035_C_T;22_45566912_C_A;22_45566843_A_G;22_45566702_C_T;22_45566500_G_A;22_45566413_T_C;22_45566222_ACC_A;22_45565915_T_G;22_45565318_A_C;22_45564936_C_T;22_45564776_A_C;22_45564427_A_C;22_45563725_C_G;22_45563409_G_T;2…	22_45577231_T_C;	0.14356435643564355	22	1	45559722	45583896	0.13795119166881145	22_45553563_T_C	4.30302600990099
ENSG00000093009	ENSG00000093009	O75419-2	22_19467652_T_C	rs5748232	5.479128828800829e-05	8.254288660501775e-06	1.0	3.06692041103966e-09	0.3654982023549133	6.6518868971461545e-18	0.8378063601986687	0.2716839869327304	0.41346442789204174	0.9526041477923828	-0.005895419293018067	202	2800651.5399650824	0.12733124726906125	10	0.20314358926681306	False	19467652,19457970					22_19467652_T_C;			0.3663366336633663	22	1	19466982	19508135			3.366340262376238
ENSG00000093072	ENSG00000093072	A0A087X0I3	22_17680519_A_C	rs17807317	1.8151361688697016e-32	1.6997646436799265e-35	1.0	4.429883808520002e-51	1.3072921508656563	9.465032968953571e-52	1.2550157325855134	1.3259954983045552e-05	0.9598203199375492	8.514970780909643e-10	0.7616293494699438	106	384253.17633898533	0.5155101079312729	1	0.4848722223284192	False	17680519,17680971,17685194,17685351				22_17680519_A_C;	22_17685351_C_A;22_17685194_T_A;22_17680971_G_A;22_17680519_A_C;			0.4504950495049505	22	-1	17660194	17702879	1.0	22_17680519_A_C	3.8203884356435647
ENSG00000093144	ENSG00000093144	Q9NTX5	6_127769338_C_G		0.008256218812446908	0.002155140811396068	1.0	5.26879004242669e-06	0.3203147868810263	0.0001320452070159196	0.30703923954323875	6.034826058949828e-05	0.3667990688882079	2.1465100870626563e-06	0.3679772614845001	202	12032832.541934887	0.1828354443991269	14	0.10545911784076133	False	127769338								0.2599009900990099	6	-1	127609855	127664754	0.7417872067233923	6_127700671_A_G	3.530405153465346
ENSG00000094804	ENSG00000094804	Q99741	17_38378419_G_C	rs189030865	0.04102900052284143	0.01398050105606829	1.0	5.904823436554622e-05	0.3251616642722438	0.0009251691628582756	0.3018964613528798	0.00933455274751135	0.7324750996003064	0.07823969177930643	0.20678178363958355	202	3479798.683559108	0.20746594722078399	12	0.2850547278643153	True	38378419								0.13861386138613865	17	1	38443885	38459171			4.904935490099009
ENSG00000094975	ENSG00000094975	Q9UBS9	1_172627864_A_T	rs41309790	0.041211070462013104	0.014071484553165424	1.0	2.8898296644446112e-05	0.3873580462911061	2.400231899631234e-05	0.33492688524584513	0.2710265782822341	0.2273689777138768	0.011349128261867163	-0.2482951106878064	194	1466358.256023405	0.18603026731607208	6	0.17469487894936506	False	172627864,172633350								0.1188118811881188	1	1	172501489	172580971			3.774370864911305
[truncated: 3,002 more rows]
