# Supplementary material for: Population-scale proteome variation in human induced pluripotent stem cells
Source: eLife. 2020 Aug 10;9:e57390. doi: 10.7554/eLife.57390 (PMC7447446; doi:10.7554/eLife.57390)
Supplement: Figure 3—source data 1. — Consists of variants mapped at RNA, transcript isoform resolution, for genes detected at both RNA and protein levels. The table columns are analogous to Figure 2—source data 1 pQTL_results. [file elife-57390-fig3-data1.xls]

ensembl_gene_id	ensembl_gene_id	feature_id	protein_id	snp_id	snp_rsid	q-value	empirical_feature_p_value	number_features	transcript_nominal_p_value_bonf	transcript_eff_size	mrna_nominal_p_value_bonf	mrna_eff_size	peptide_nominal_p_value_bonf	peptide_eff_size	protein_nominal_p_value_bonf	protein_eff_size	in_corum	ld_snps	inframe_LD	frameshift_LD	splicing_LD	UTR_LD	intron_LD	NMD_transcript_LD	synonymous_LD	maf_hipsci	chromosome_gene	strand	gene_start	gene_end
ENSG00000000419	ENSG00000000419	ENST00000371582_DPM1	Q5QPK2	20_49495326_G_A	rs6122981	0.030183262554501912	0.0016665356177385706	7.0	1.1392537402230415e-05	0.5394162482150796	0.9218539956198659	0.00705177672641287	0.8962541537950564	0.28356669953362923	0.6122217349307022	-0.04589316168691249	False	49495326,49490888,49494268,49494835,49495021,49495036,49495319,49495389,49495458,49496121,49496178,49498121,49498559,49501047,49502952,49506195,49506501,49512803,49513966,49514013,49516100,49520193,49523807,49525434,49534959,49536969,49537488,49538243,49538799,49542079,49543474,49544097,49563379					20_49563379_T_C;			0.3118811881188119	20	-1	49551404	49575092
ENSG00000000460	ENSG00000000460	ENST00000459772_C1orf112	Q9NSG2	1_169893204_T_G	rs603246	0.08623868047216625	0.003792594992771461	10.0	1.2826671789483813e-06	-0.38754019367268505	0.0005217793568120755	-0.2697700686420471	1.34990561447531	-0.1853476048319631	0.8862803610704242	-0.010783804069518732	False	169893204,169850666,169923676,169930005								0.4752475247524752	1	1	169631245	169823221
ENSG00000001084	ENSG00000001084	ENST00000514004_GCLC	P48506	6_53382370_G_C		2.8840340318522987e-16	1.2975100178587443e-18	12.0	6.1967156922219506e-21	-0.7722356708349438	6.266886673133215e-05	-0.21208501130307555	0.7132620191580691	-0.3278838731172655	0.07702825769316671	0.09193542097923936	False	53382370,53376991,53377122,53377550,53377619,53377834,53378369,53379405,53380390,53380581,53382012,53382260,53384030,53384175,53385084,53389995,53397970		6_53380581_GA_G;		6_53378369_T_G;6_53377834_C_T;	6_53397970_C_G;6_53389995_A_T;6_53385084_C_T;6_53384175_T_C;6_53384030_A_C;6_53382260_A_T;6_53382012_G_A;6_53380581_GA_G;6_53380390_G_A;6_53379405_A_C;6_53378369_T_G;6_53377834_C_T;6_53377619_C_T;6_53377550_A_G;6_53377122_C_T;6_53376991_T_C;6_53382370_G_C;	6_53397970_C_G;6_53389995_A_T;6_53385084_C_T;6_53384175_T_C;6_53384030_A_C;6_53382260_A_T;6_53382012_G_A;6_53380581_GA_G;6_53380390_G_A;6_53379405_A_C;6_53378369_T_G;6_53377834_C_T;6_53377619_C_T;6_53377550_A_G;6_53377122_C_T;6_53376991_T_C;6_53382370_G_C;		0.4702970297029703	6	-1	53362139	53481768
ENSG00000001561	ENSG00000001561	ENST00000321037_ENPP4	Q9Y6X5	6_46100182_A_G		0.0011200518748292214	0.000309852035944287	1.0	3.493151276251428e-08	0.3981282980302637	5.89927297192478e-09	0.4870435348065266	8.166138417302029e-05	0.525953266575274	2.6567999628426214e-06	0.4687735156562568	False	46100182					6_46100182_A_G;			0.33910891089108913	6	1	46097730	46114436
ENSG00000001629	ENSG00000001629	ENST00000486698_ANKIB1	Q9P2G1	7_91933058_T_A	rs79951488	6.627947989966209e-06	1.796363898883539e-07	7.0	6.3620540166461425e-12	-0.9497107445460188	0.19385570332102164	-0.14075316528168616	0.9544093363390086	-0.37071699316022	0.9632319331197744	-0.007063120357307052	False	91933058,91573788,91580030,91581503,91585190,91593075,91598164,91606642,91612986,91617643,91627952,91628538,91639119,91666661,91694118,91707604,91707958,91721529,91721673,91728923,91738437,91738788,91741963,91762125,91763104,91765823,91772998,91783579,91788997,91789253,91797223,91798364,91802334,91804685,91805266,91808608,91814851,91818428,91818747,91821537,91832451,91836688,91838190,91838513,918…		7_92020809_AT_A;7_92016396_T_TCTC;7_92004192_GA_G;7_91990156_GTCT_G;7_91988077_ATTTG_A;7_91984566_CCTCTTTTTTTTTCTTTTTAATT_C;7_91975176_A_AAG;7_91970820_AC_A;7_91961234_C_CTT;7_91948920_GTTC_G;7_91926980_GT_G;7_91890342_C_CT;			7_92026630_T_C;7_92025187_T_G;7_92024891_G_C;7_92020809_AT_A;7_92018691_A_G;7_92018459_A_G;7_92016928_A_C;7_92016584_A_G;7_92016396_T_TCTC;7_92014209_T_G;7_92013728_T_G;7_92013031_T_A;7_92009550_A_G;7_92006929_A_G;7_92006387_C_T;7_92004192_GA_G;7_91998648_A_T;7_91997052_A_G;7_91990156_GTCT_G;7_91988077_ATTTG_A;7_91987323_G_A;7_91985810_G_A;7_91984566_CCTCTTTTTTTTTCTTTTTAATT_C;7_91982698_T_C;7_919…	7_91990156_GTCT_G;7_91988077_ATTTG_A;7_91987323_G_A;7_91985810_G_A;7_91984566_CCTCTTTTTTTTTCTTTTTAATT_C;7_91982698_T_C;7_91981159_A_T;7_91980898_T_C;7_91978942_T_C;7_91978511_G_A;7_91975176_A_AAG;7_91970821_C_A;7_91970820_AC_A;7_91967570_A_T;7_91962222_G_A;7_91961234_C_CTT;7_91961173_A_G;7_91960770_T_A;7_91958951_C_T;7_91953386_A_G;7_91948920_GTTC_G;7_91946057_A_C;7_91945601_A_G;7_91939132_G_A;7_…	7_92027537_C_G;	0.10643564356435643	7	1	91875548	92030698
ENSG00000001630	ENSG00000001630	ENST00000450723_CYP51A1	A0A0C4DFL7	7_91752690_C_A	rs2269727	9.022723402585467e-08	2.610800198975575e-09	5.0	6.915917512559045e-13	0.3421542870272906	0.2823089957194355	0.06614985019116014	1.4707330059547394	0.1657181028528072	0.6785686655413914	-0.03704903105280444	False	91752690,91479402,91481512,91482418,91484799,91485231,91485461,91486070,91486751,91487360,91490208,91490746,91492103,91500236,91507859,91514672,91516358,91516727,91518075,91520227,91520628,91520816,91521752,91522874,91524677,91527176,91527367,91527945,91532456,91532720,91539003,91541481,91545727,91546327,91546526,91546625,91547369,91549657,91549937,91551100,91551222,91551245,91551788,91552016,915…		7_91761050_GT_GTT;		7_91742602_A_G;7_91742348_C_A;7_91742187_A_G;7_91741971_C_T;	7_91762629_C_A;7_91762145_A_G;7_91761638_A_G;7_91761617_G_A;7_91761050_GT_GTT;7_91759597_A_G;7_91758111_A_G;7_91757479_A_G;7_91757393_C_T;7_91753579_C_T;7_91751120_G_A;7_91750578_A_G;7_91750450_A_G;7_91750374_C_T;7_91750116_G_A;7_91750107_T_G;7_91750016_T_C;7_91749798_C_A;7_91747120_G_A;7_91746727_T_C;7_91745441_C_G;7_91744311_C_G;7_91752690_C_A;		7_91743150_A_G;	0.3836633663366337	7	-1	91741465	91772266
ENSG00000002330	ENSG00000002330	ENST00000309032_BAD	Q92934	11_64031798_G_C	rs589030	0.08042852188231933	0.004994855275683911	7.0	7.4751980865233445e-06	-0.3356060151524193	1.7513191576981368e-07	-0.32307415765352976	0.4930698710554642	-0.13468136646588968	0.2614315741638921	-0.124518534427694	False	64031798								0.30445544554455445	11	-1	64037302	64052176
ENSG00000002549	ENSG00000002549	ENST00000512397_LAP3	P28838	4_17578818_G_C		0.011884130558261813	0.0004123522129719165	10.0	1.679750185416451e-06	0.5070029852167062	0.10384537035566836	0.10701098925225867	0.1446308367694872	0.4510638870562396	0.13625829433476028	0.16586355680501766	False	17578818		4_17578814_CGCGGGCGCACACGAAT_C;		4_17578818_G_C;4_17578814_CGCGGGCGCACACGAAT_C;				0.452970297029703	4	1	17578815	17609595
ENSG00000002822	ENSG00000002822	ENST00000455998_MAD1L1	Q9Y6D9	7_2268970_A_G	rs1626670	0.006540859370065964	9.255396621241304e-05	23.0	1.0686670215553637e-06	0.443342410156681	0.4927846602856213	-0.04900278194876952	1.6490345380030187	0.2043626837640935	0.5412633426947565	0.05005567671770583	True	2268970,2257467,2258084,2258139,2258899,2260715,2260928,2262934,2263479,2269552,2280631,2282964					7_2269552_G_T;7_2262934_C_G;7_2260928_T_C;7_2260715_G_T;7_2258899_G_A;7_2258139_T_C;7_2258084_C_G;7_2257467_A_G;7_2268970_A_G;			0.4108910891089109	7	-1	1855429	2272878
ENSG00000003056	ENSG00000003056	ENST00000544245_M6PR	P20645	12_9082581_A_G		9.31408190103008e-15	4.99372971052248e-17	12.0	1.0848788239893987e-25	1.2553345661667912	0.00026859669645502767	-0.3799718650096182	1.1527625971714443e-06	-0.02036083030045788	1.3901036842995895e-06	-0.7450598135261575	False	9082581,9098995	12_9098995_G_GAAC;	12_9098995_G_GAAC;			12_9098995_G_GAAC;	12_9098995_G_GAAC;		0.08663366336633663	12	-1	9092959	9102551
ENSG00000003147	ENSG00000003147	ENST00000406470_ICA1	E7ENI6	7_8255133_A_G	rs10486214	0.09568255319355698	0.0023783713136013144	18.0	2.6843329941790188e-05	-0.32269313029068203	0.0192073013138378	-0.18113004567868626	0.3674683192462399	-0.13334425794979352	1.8253755887250944	-0.00831808856423133	False	8255133,8254348,8258516,8259088					7_8259088_G_A;7_8258516_C_T;7_8254348_C_A;7_8255133_A_G;	7_8259088_G_A;7_8258516_C_T;7_8254348_C_A;7_8255133_A_G;		0.3811881188118812	7	-1	8152814	8302317
ENSG00000003509	ENSG00000003509	ENST00000441905_NDUFAF7	Q7L592	2_37480249_A_G	rs1056021	5.734760784712035e-15	2.7343963714811382e-17	13.0	1.3280723931304016e-22	0.9663213324430306	5.339910300528321e-06	-0.3694938522957529	1.3281520789480975e-08	-0.09052052526936376	1.3020043305223705e-06	-0.43291990802284586	False	37480249				2_37480249_A_G;		2_37480249_A_G;		0.3094059405940594	2	1	37458774	37480546
ENSG00000003987	ENSG00000003987	ENST00000180173_MTMR7	Q9Y216	8_17270289_C_T	rs13266122	0.08254287759423766	0.0036048189191649547	10.0	4.0910838874708845e-06	0.2670774990978623	5.323942893706986e-07	0.3818060220448439	0.8659823080196897	0.02995250014470718	0.7790180955408573	-0.0255173601131018	False	17270289,17266143,17266900,17267528,17267569,17267656,17267851,17267884,17268058,17270502,17270640,17270764					8_17270764_C_A;8_17270640_A_C;8_17270502_T_C;8_17268058_C_G;8_17267884_A_C;8_17267851_T_A;8_17267656_A_T;8_17267569_C_T;8_17267528_T_C;8_17266900_T_C;8_17266143_C_T;8_17270289_C_T;	8_17270764_C_A;8_17270640_A_C;8_17270502_T_C;8_17268058_C_G;8_17267884_A_C;8_17267851_T_A;8_17267656_A_T;8_17267569_C_T;8_17267528_T_C;8_17266900_T_C;8_17266143_C_T;8_17270289_C_T;		0.33663366336633666	8	-1	17155539	17271037
ENSG00000004399	ENSG00000004399	ENST00000324093_PLXND1	Q9Y4D7	3_129275206_C_T	rs11920311	0.0006475443354935893	9.503545424074085e-06	18.0	4.988828200871736e-07	-0.348794790437692	4.646061979339215e-08	-0.4981075860179376	0.009327934055134879	-0.6655879318641427	0.2030883446468505	-0.1892111994916048	True	129275206,129273315,129274363,129274456,129274655,129274814,129274936,129275403,129275619,129276330,129276412,129277146,129277481,129277992,129278182,129278446,129279570,129280261,129280944,129281438,129288128		3_129278446_GCCCCCCCA_G;3_129278446_GC_G;3_129274243_GGGCGCTCTGCCAGGTCTGCCCGCTCTCTGGAACAGTCATTTCCAGTGTTGCATGGGGAGCCTCTCGGGACCCCTCCCCGGGTCCTCTGCGCAAGCGGCAGCTATTCACAGTTGGTGCATGATACGTTTTTTAATATATAAAAGCTTTAAAAAAAAAAGTGGTGCTATCTTTAGAAACACTTTCAGCAAGATCAAGTAGCCCAGCTACAGCCTCGGTGCATCTTAACCCCTCTCCTTTTCCTGGAGACGGGGCTCCCAGCTCCTGTGCCCCCCATCCCTCCCCTCCACCCTCCCTGCTCCTGGAGAAGCCCACAGAGCACCCCATGGCGCGGGCACTGCCCACTCT…	3_129279570_T_C;3_129278446_GCCCCCCCA_G;3_129274243_GGGCGCTCTGCCAGGTCTGCCCGCTCTCTGGAACAGTCATTTCCAGTGTTGCATGGGGAGCCTCTCGGGACCCCTCCCCGGGTCCTCTGCGCAAGCGGCAGCTATTCACAGTTGGTGCATGATACGTTTTTTAATATATAAAAGCTTTAAAAAAAAAAGTGGTGCTATCTTTAGAAACACTTTCAGCAAGATCAAGTAGCCCAGCTACAGCCTCGGTGCATCTTAACCCCTCTCCTTTTCCTGGAGACGGGGCTCCCAGCTCCTGTGCCCCCCATCCCTCCCCTCCACCCTCCCTGCTCCTGGAGAAGCCCACAGAGCACCCCATGGCGCGGGCACTGCCCACTCTA…	3_129274936_A_G;3_129274814_G_A;3_129274655_C_T;3_129274456_C_T;3_129274243_GGGCGCTCTGCCAGGTCTGCCCGCTCTCTGGAACAGTCATTTCCAGTGTTGCATGGGGAGCCTCTCGGGACCCCTCCCCGGGTCCTCTGCGCAAGCGGCAGCTATTCACAGTTGGTGCATGATACGTTTTTTAATATATAAAAGCTTTAAAAAAAAAAGTGGTGCTATCTTTAGAAACACTTTCAGCAAGATCAAGTAGCCCAGCTACAGCCTCGGTGCATCTTAACCCCTCTCCTTTTCCTGGAGACGGGGCTCCCAGCTCCTGTGCCCCCCATCCCTCCCCTCCACCCTCCCTGCTCCTGGAGAAGCCCACAGAGCACCCC…	3_129288128_G_A;3_129281438_C_T;3_129280944_C_T;3_129280261_C_T;3_129279570_T_C;3_129278446_GCCCCCCCA_G;3_129278446_GC_G;3_129278182_A_G;3_129277992_C_T;3_129277481_T_C;3_129277146_A_C;3_129276412_T_C;3_129275619_T_C;3_129275403_C_A;3_129274936_A_G;3_129274814_G_A;3_129274655_C_T;3_129274456_C_T;3_129274243_GGGCGCTCTGCCAGGTCTGCCCGCTCTCTGGAACAGTCATTTCCAGTGTTGCATGGGGAGCCTCTCGGGACCCCTCCCCGGGTCCTCTGC…	3_129281438_C_T;3_129280944_C_T;3_129280261_C_T;3_129279570_T_C;3_129278446_GCCCCCCCA_G;3_129278446_GC_G;3_129278182_A_G;3_129277992_C_T;3_129277481_T_C;3_129277146_A_C;3_129276412_T_C;3_129275619_T_C;3_129275403_C_A;3_129274936_A_G;3_129274814_G_A;3_129274655_C_T;3_129274456_C_T;3_129274243_GGGCGCTCTGCCAGGTCTGCCCGCTCTCTGGAACAGTCATTTCCAGTGTTGCATGGGGAGCCTCTCGGGACCCCTCCCCGGGTCCTCTGCGCAAGCGGCAGCTATT…	3_129274363_G_A;3_129275206_C_T;	0.12871287128712872	3	-1	129274018	129325661
ENSG00000004455	ENSG00000004455	ENST00000487289_AK2	F8W1A4	1_33531783_C_T	rs6678630	1.2943481368652656e-20	3.3375786602844646e-23	13.0	5.347896894473765e-26	0.9864856955320486	0.8111946204767841	0.018036293923657284	2.244980598376542	0.14197694333165112	0.7314256137895903	0.033526317939741264	False	33531783,33453011,33453463,33453718,33455486,33455757,33455798,33455936,33456219,33457709,33458803,33459484,33461679,33461730,33462624,33463006,33465764,33467817,33468276,33470241,33472924,33472942,33479861,33482349,33482763,33483343,33484220,33486479,33489487,33489510,33489615,33489645,33490422,33492760,33493296,33494018,33494458,33496639,33498310,33499428,33499525,33500425,33504421,33505014,335…					1_33500425_T_G;1_33499525_G_A;1_33499428_C_G;1_33498310_T_C;1_33496639_C_T;1_33494458_T_C;1_33494018_A_C;1_33493296_G_T;1_33492760_T_C;1_33490422_G_A;1_33489645_G_A;1_33489615_C_T;1_33489510_G_A;1_33489487_C_T;1_33486479_G_A;1_33484220_C_A;1_33483343_C_T;1_33482763_C_A;1_33482349_C_T;1_33479861_T_C;	1_33500425_T_G;1_33499525_G_A;1_33499428_C_G;1_33498310_T_C;1_33496639_C_T;1_33494458_T_C;1_33494018_A_C;1_33493296_G_T;1_33492760_T_C;1_33490422_G_A;1_33489645_G_A;1_33489615_C_T;1_33489510_G_A;1_33489487_C_T;1_33486479_G_A;1_33484220_C_A;1_33483343_C_T;1_33482763_C_A;1_33482349_C_T;1_33479861_T_C;		0.2599009900990099	1	-1	33473585	33546597
ENSG00000004534	ENSG00000004534	ENST00000442092_RBM6	P78332	3_50204745_C_T	rs3774745	0.0011667465463343356	1.908332181724971e-05	17.0	1.009793047680168e-08	0.4045558688578649	1.598148476037051e-13	0.4837809396845544	1.2667563269562223	0.13280666662517834	0.996377447627366	-0.00030358147441589267	False	50204745,50197097,50207227,50208406,50209053								0.4851485148514851	3	1	49977440	50137478
ENSG00000004660	ENSG00000004660	ENST00000381769_CAMKK1	J3KPJ3	17_3814826_C_A	rs9898098	0.04924148798376933	0.004014843503922477	5.0	1.907756242984349e-05	-0.3981947860389558	0.0027457619543804768	-0.2613245597075698	1.1696246710315057	-0.1367693654778801	0.8413942860243632	-0.022883891236525008	False	3814826								0.405940594059406	17	-1	3763609	3798185
ENSG00000004700	ENSG00000004700	ENST00000314748_RECQL	P46063	12_21654831_G_T	rs1060126	0.010270073616150779	0.0004366701186851397	8.0	8.344902922357018e-07	-0.4918684924146282	0.7341556776044351	-0.034234682226682925	1.1469292980407098	-0.8204435205745162	0.7910633996625998	-0.029972782548825405	False	21654831,21654407			12_21654407_G_A;	12_21654407_G_A;	12_21654407_G_A;			0.2103960396039604	12	-1	21621845	21654603
ENSG00000005075	ENSG00000005075	ENST00000393794_POLR2J	P52435	7_102114508_A_G	rs116733631	0.00018941713800857198	2.2780407388116306e-05	2.0	2.4934970326271167e-08	-0.22216014672016016	0.2415357413652393	0.05871614121979945	2.4162017127110507	-0.112124150624898	0.5259316668025598	-0.05618476197029043	True	102114508					7_102114508_A_G;			0.21287128712871287	7	-1	102113565	102119354
ENSG00000005100	ENSG00000005100	ENST00000225296_DHX33	Q9H6R0	17_5378934_C_T	rs56968592	0.0006615740339700336	3.5047394130804875e-05	5.0	8.12451626443858e-08	0.27938188803380465	1.7657493390849887e-07	0.3217922007488135	8.101700991537894e-07	0.20562938295635536	0.2393160792988337	-0.12292617642804647	False	5378934,5372259,5382202,5385398,5394204,5394248,5394330,5394745,5395334,5395477,5395883,5396314,5396697,5396735,5397277,5397401				17_5372259_G_A;				0.20544554455445546	17	-1	5344232	5372380
ENSG00000005156	ENSG00000005156	ENST00000378526_LIG3	P49916	17_33313729_A_G	rs3135967	0.0035657513472796905	6.849350351712709e-05	16.0	1.729667265751873e-10	-0.2978083701430793	1.8782696575490882e-10	-0.27589468004510914	0.7531258845223168	-0.3359414746968597	0.052159548696031004	-0.1355055200768649	True	33313729,33301215,33307586,33324382,33331575,33332177,33332629,33351917,33356907,33360374,33382205,33382734,33382801,33383030,33399745,33412739,33414758				17_33331575_C_T;17_33307586_G_A;	17_33324382_C_T;17_33313729_A_G;	17_33313729_A_G;		0.4430693069306931	17	1	33307513	33332083
ENSG00000005175	ENSG00000005175	ENST00000005386_RPAP3	Q9H6T3	12_47939996_T_A	rs10875661	0.06655949085622377	0.004034010207991382	7.0	1.2398955774044604e-05	0.21543878337391734	0.03181622492851982	0.14297601789527412	0.5278554640753701	0.21982576154167247	0.23413011178981874	0.09609931529219252	False	47939996								0.3589108910891089	12	-1	48057070	48099844
ENSG00000005436	ENSG00000005436	ENST00000321027_GCFC2	P16383	2_75881264_G_T	rs7592795	3.11373368834655e-11	2.6768481057191104e-13	11.0	9.071002515869856e-17	0.4937935777460911	1.2078811677596778e-13	0.6426946720742873	4.193154688689353e-07	0.7758467818628331	1.098701346825063e-07	0.5003200497968942	False	75881264,75857892,75859919,75860271,75861744,75862484,75862704,75863450,75878618,75880366,75880374,75881828,75882576,75883390,75883878,75884988,75886066,75886643,75887579,75887834,75888096,75888160,75890408,75890540,75892319,75895978,75903170,75903864,75905719,75911977,75911985,75913517,75914063,75915035,75917612,75918070,75919500,75921232,75928300,75929130,75929238,75930048,75931589,75931600,759…		2_75934688_TA_T;2_75921232_G_GCTTA;2_75919500_AG_A;2_75891914_AAAACAAAACAAATTTCTCCCTTTAAAAATGCAATGTATGAGGGAACAGCGGTCAATTCAGAACCTGATCATCAGTTGTTAATCTAAAACAAAAGCTTTACCTTAAGCCAATATCTAAAGTAGCATAAAACACAGAGAGATGCTGCCATCTCCACTTAATTATAAAGTTCAAATACAGATCATTAGTGGATGTATTCTGGCAAATTTCAATGTGAATTACTGTAAAAGGTAGAAAAGCATATAGTAAGTCTATCAGAAATTTCAGTAGTGCTGCGTTGCTATTAGCTTGTATGAGACATTGTGGTGGAAGCAATGGTGGGAGTATATTCACACATCA…	2_75891914_AAAACAAAACAAATTTCTCCCTTTAAAAATGCAATGTATGAGGGAACAGCGGTCAATTCAGAACCTGATCATCAGTTGTTAATCTAAAACAAAAGCTTTACCTTAAGCCAATATCTAAAGTAGCATAAAACACAGAGAGATGCTGCCATCTCCACTTAATTATAAAGTTCAAATACAGATCATTAGTGGATGTATTCTGGCAAATTTCAATGTGAATTACTGTAAAAGGTAGAAAAGCATATAGTAAGTCTATCAGAAATTTCAGTAGTGCTGCGTTGCTATTAGCTTGTATGAGACATTGTGGTGGAAGCAATGGTGGGAGTATATTCACACATCATGACATTAGCAAATAATACAAATCTGATTTTTTTTTTTTTTAAAGGGACTT…	2_75929238_C_A;2_75929130_C_A;2_75915035_C_T;2_75891914_AAAACAAAACAAATTTCTCCCTTTAAAAATGCAATGTATGAGGGAACAGCGGTCAATTCAGAACCTGATCATCAGTTGTTAATCTAAAACAAAAGCTTTACCTTAAGCCAATATCTAAAGTAGCATAAAACACAGAGAGATGCTGCCATCTCCACTTAATTATAAAGTTCAAATACAGATCATTAGTGGATGTATTCTGGCAAATTTCAATGTGAATTACTGTAAAAGGTAGAAAAGCATATAGTAAGTCTATCAGAAATTTCAGTAGTGCTGCGTTGCTATTAGCTTGTATGAGACATTGTGGTGGAAGCAATGGTGGGAGTATATTCACACATCATGACAT…	2_75936976_C_G;2_75936935_T_A;2_75935894_T_C;2_75935614_A_T;2_75935038_C_G;2_75934688_T_A;2_75934688_TA_T;2_75933830_T_A;2_75932846_C_T;2_75931600_T_G;2_75931589_T_A;2_75930048_C_G;2_75929238_C_A;2_75929130_C_A;2_75928300_G_T;2_75921232_G_GCTTA;2_75919500_AG_A;2_75919500_A_C;2_75918070_T_G;2_75917612_G_A;2_75913517_C_G;2_75911985_T_C;2_75911977_G_A;2_75905719_C_T;2_75903864_T_C;2_75903170_A_G;2_7…		2_75915035_C_T;	0.36386138613861385	2	-1	75879126	75938115
ENSG00000005448	ENSG00000005448	ENST00000482605_WDR54	Q9H977	2_74633970_A_G	rs13416215	0.03915777671287827	0.0011974855263877145	13.0	2.29329063695912e-05	-0.4171410076933673	0.0008171664133241593	-0.2852224319122621	0.3227158900205458	-0.7150219031146686	0.8493146745416005	-0.02103812173662556	False	74633970								0.15841584158415842	2	1	74648805	74652882
ENSG00000005801	ENSG00000005801	ENST00000429541_ZNF195	A0A087WT67	11_3373819_G_A	rs35810198	2.195428152709119e-09	9.36987516866815e-12	28.0	1.281970125209337e-14	0.7626625140229624	0.5379269728505003	0.0393189536029928	0.014561294155325668	0.5668134965679826	0.10241227510250388	0.1926546858972309	False	3373819,3375965,3375990,3376385,3381843,3384965,3386092,3387628,3387797,3394894,3394960,3394975,3395538,3399327			11_3394894_G_A;	11_3394894_G_A;	11_3399327_G_A;11_3395538_C_A;11_3394975_C_A;11_3394960_A_G;11_3394894_G_A;11_3387797_C_T;11_3387628_A_C;11_3386092_A_C;11_3384965_T_C;11_3381843_A_G;11_3376385_G_T;11_3375990_C_T;11_3375965_C_T;11_3373819_G_A;	11_3399327_G_A;11_3395538_C_A;11_3394975_C_A;11_3394960_A_G;11_3394894_G_A;11_3387797_C_T;11_3387628_A_C;11_3386092_A_C;11_3384965_T_C;11_3381843_A_G;		0.2425742574257425	11	-1	3360491	3400448
ENSG00000005812	ENSG00000005812	ENST00000355619_FBXL3	C9J0Y7	13_77569672_T_C	rs9573972	0.001171761795221844	5.434776929928022e-05	6.0	1.1116898127621462e-09	0.7125042431302031	8.572855777084134e-12	0.9508683353896812			0.7638435171075011	0.07208262827776846	False	77569672,77576383,77580732,77582519,77582708,77584408,77584428,77585432,77585992,77586425,77587240,77587949,77588491,77588579,77589256,77591227,77594515,77594925,77595490,77596182,77596831,77597029,77597080,77598252				13_77580732_T_C;	13_77598252_T_A;13_77597080_T_G;13_77597029_A_T;13_77596831_C_T;13_77596182_T_G;13_77595490_A_T;13_77594925_T_G;13_77594515_A_G;13_77591227_T_C;13_77589256_A_G;13_77588579_C_T;13_77588491_A_G;13_77587949_G_A;13_77587240_C_T;13_77586425_C_T;13_77585992_C_A;13_77585432_T_C;13_77584428_T_C;13_77584408_C_G;13_77582708_C_G;13_77582519_C_T;			0.06930693069306931	13	-1	77566740	77601330
ENSG00000005884	ENSG00000005884	ENST00000320031_ITGA3	P26006-1	17_48131632_T_C	rs57066151	0.06751896768701991	0.0016859420923966324	17.0	5.074364334598324e-06	-0.5012853670408759	6.634912189448625e-07	-0.5329757238001189	0.00010278598621844172	-1.1194887070392368	0.07013210707936589	-0.26129825979289034	True	48131632,48131195,48131460,48131919,48132643,48132713,48132727,48132763,48133313,48137168,48142693,48142975,48144214,48145094,48151353,48153924,48158843				17_48151353_T_C;	17_48158843_G_C;17_48153924_T_C;17_48145094_C_T;17_48144214_T_C;17_48142975_C_T;17_48142693_A_G;17_48137168_C_T;	17_48153924_T_C;17_48151353_T_C;17_48145094_C_T;17_48144214_T_C;17_48142975_C_T;17_48142693_A_G;17_48137168_C_T;	17_48151353_T_C;	0.11386138613861388	17	1	48133332	48167845
ENSG00000005955	ENSG00000005955	ENST00000304718_GGNBP2	Q9H3C7	17_34892731_C_A	rs11650008	3.893589038478469e-37	1.2721153971870895e-40	9.0	2.85100940057072e-48	-1.2751366640056292	8.02257962126784e-07	-0.2465719645338504	0.07304073558550674	-0.4264391781255377	0.6600847923702008	-0.047958923270056616	False	34892731,34841617,34842521,34848874,34850623,34862220,34866546,34866915,34867415,34868226,34869155,34873031,34873697,34876195,34877859,34895455,34896877,34900836,34905408,34912744,34914149,34916453,34917608,34928562,34937221,34946547,34951204		17_34916453_TA_T;		17_34900836_G_C;	17_34937221_T_C;17_34928562_C_T;17_34917608_T_C;17_34916453_TA_T;17_34914149_A_G;17_34912744_G_C;17_34905408_A_G;			0.4727722772277228	17	1	34900737	34946278
ENSG00000006007	ENSG00000006007	ENST00000353258_GDE1	Q9NZC3	16_19512962_C_T	rs916076	6.3242200527566825e-22	3.6002381857612736e-24	5.0	6.321733079468376e-30	-1.1384354948249382	2.4636708686549796e-37	-1.189123024546062	0.007635903727598686	-0.3883393782274762	0.058273820585004764	-0.21864977740427705	False	19512962,19484893,19497458,19497948,19500680,19503048,19503770,19505205,19509333,19509600,19509938,19512819,19514141,19516705,19518370,19521194,19521671,19525562,19525829,19526763,19527076,19529203,19531828,19534925,19535692,19541025,19542862,19543981,19546594,19546926,19548116,19548290,19549306,19550161,19550446,19550602,19551716,19553059,19554960,19556258,19556930,19557490,19557564,19557844,195…		16_19518370_AG_A;		16_19514141_A_G;	16_19531828_T_C;16_19529203_A_T;16_19527076_G_A;16_19526763_T_C;16_19525829_T_G;16_19525562_G_A;16_19521671_A_C;16_19521194_G_C;16_19518370_AG_A;16_19516705_T_C;	16_19531828_T_C;16_19529203_A_T;16_19527076_G_A;16_19526763_T_C;16_19525829_T_G;16_19525562_G_A;16_19521671_A_C;16_19521194_G_C;16_19518370_AG_A;16_19516705_T_C;16_19514141_A_G;		0.1707920792079208	16	-1	19513015	19533467
ENSG00000006015	ENSG00000006015	ENST00000597371_C19orf60	Q96EN9	19_18566804_T_G	rs1806980	0.026049666850901817	0.001234760132520821	8.0	7.234194260129367e-06	-0.3073155478279277	0.1122772749531183	-0.083278053163557	0.06086397200952155	-0.3174855806467288	0.0918632056727282	-0.2367191090054659	False	18566804,18520865,18527257,18530161,18533642,18536416,18538742,18539744,18540988,18542000,18542701,18543054,18543270,18545341,18545540,18546029,18546678,18547305,18548249,18548884,18550276,18552208,18553580,18553685,18554204,18554972,18556749,18557035,18558876,18559410,18559657,18560282,18562624,18563880,18564705,18565039,18565951,18566395,18567555,18569492,18569833,18570035,18571141,18572834,185…								0.3663366336633663	19	1	18699495	18703146
ENSG00000006047	ENSG00000006047	ENST00000007699_YBX2	Q9Y2T7	17_7197794_C_A	rs222859	0.0001697343013911904	5.7810167174100704e-06	7.0	3.3741071675908448e-09	0.4518387183610786	2.6853753995503672e-06	0.37224863001122577	6.751096329807497e-10	0.8803459139057307	3.1604166106882233e-13	0.7922071983066256	False	7197794	17_7197794_C_A;							0.20544554455445546	17	-1	7191571	7197934
ENSG00000006114	ENSG00000006114	ENST00000394379_SYNRG	Q9UMZ2-5	17_35972024_C_A		1.920089527104919e-08	1.5250825252995469e-10	17.0	2.226209299942692e-15	-0.6851594325994096	0.054074669661413666	0.12890582294116773	0.5347625240335708	-0.4091194868135428	0.4512586941897524	-0.05459678553940206	False	35972024,35900917,35901374,35916648,35932917,35936282,35950861,35956391,35958676,35986659,35991339,35998683,36000607	17_35956391_G_C;	17_35916648_GA_G;17_35900917_AGTAGAT_A;	17_35956391_G_C;		17_35958676_G_A;17_35956391_G_C;17_35950861_C_T;17_35936282_C_T;17_35932917_T_C;17_35916648_GA_G;17_35901374_T_C;17_35900917_AGTAGAT_A;			0.19306930693069307	17	-1	35874900	35969544
ENSG00000006125	ENSG00000006125	ENST00000587805_AP2B1	K7EJ01	17_33902635_G_T	rs1037590	0.01614265306715591	0.00030418994872056474	19.0	7.953955327193752e-07	0.4231394339951367	0.007858704002214664	-0.1114053869608333	0.7250795027109869	0.1990003455225932	2.109731090528399	-0.0247176373281528	False	33902635,33884804,33885904,33889923,33889997,33892949,33907649,33913143,33918076,33923607,33929582,33944055,33949222,33952103,33952696,33955377,33959247,33962281,33967047,33969844,33974481,34000628		17_33969844_TA_T;			17_33974481_G_A;17_33969844_TA_T;17_33967047_T_C;17_33962281_C_T;17_33959247_G_A;17_33955377_T_A;17_33952696_T_C;17_33952103_C_G;17_33929582_A_G;17_33923607_G_A;17_33918076_C_T;17_33913143_A_G;17_33907649_G_A;	17_33974481_G_A;17_33969844_TA_T;17_33967047_T_C;17_33962281_C_T;17_33959247_G_A;17_33955377_T_A;17_33952696_T_C;17_33952103_C_G;17_33929582_A_G;17_33923607_G_A;17_33918076_C_T;		0.2400990099009901	17	1	33905065	34053436
ENSG00000006282	ENSG00000006282	ENST00000393244_SPATA20	A0A0U1RRL8	17_48615329_G_A	rs2306001	9.067626566086494e-19	1.3864872425208707e-21	26.0	5.632178778914941e-44	-1.520519124568854	1.5239792125774945e-32	-1.4881885087307305	4.9447545496628096e-14	-1.678412591564972	2.7880523510555338e-14	-1.0516560253586744	False	48615329,48611993,48612315,48612433,48619272,48619290,48624045,48625223,48625307		17_48625307_GGGGGAGGGGCCT_G;			17_48625307_GGGGGAGGGGCCT_G;17_48625223_C_T;			0.12376237623762375	17	1	48620419	48633213
ENSG00000006327	ENSG00000006327	ENST00000574699_TNFRSF12A	Q9NP84	16_3073240_G_T	rs10508	0.0001869877036929432	6.406356955168721e-06	7.0	3.3112076648371587e-10	0.6750135774575537	0.09374840517782718	0.08721604374976974	1.2949717906564602	0.049027411184229264	0.3832660520725728	-0.09073182810873637	False	3073240,3070788,3071964,3074426,3078165,3081318,3084029,3084053				16_3071964_T_A;	16_3070788_G_C;			0.2425742574257425	16	1	3068446	3072384
ENSG00000006453	ENSG00000006453	ENST00000005260_BAIAP2L1	Q9UHR4	7_98027580_C_T	rs1541409	1.7994766838515944e-07	5.4056262650634814e-09	5.0	3.583119814575897e-14	-0.5955701178981131	4.7190447348205766e-17	-0.7351397358090807	1.3643782892886925e-07	-0.6429737247265759	0.002423630888672283	-0.3147122739293271	False	98027580,97914305,97917910,97924226,97929183,97938443,97938618,97947055,97956758,97960146,97960800,97965821,97967685,97974555,97984077,97988428,97996593,97997164,97998124,98005766,98009224,98013839,98014041,98015435,98015868,98017099,98017192,98017730,98026554,98030349,98030513		7_98026554_ACT_A;7_98017192_AAAC_A;7_97967685_G_GTTGCGCCA;7_97960146_CCT_C;		7_98030349_G_C;	7_98026554_ACT_A;7_98017730_G_A;7_98017192_AAAC_A;7_98017099_G_A;7_98015868_G_A;7_98015435_C_T;7_98014041_G_A;7_98013839_G_A;7_98009224_G_A;7_98005766_C_T;7_97998124_T_A;7_97997164_G_C;7_97996593_T_C;7_97988428_G_A;7_97984077_C_T;7_97974555_C_T;7_97967685_G_GTTGCGCCA;7_97965821_G_C;7_97960800_G_A;7_97960146_CCT_C;7_97956758_G_A;7_97947055_G_C;7_97938618_C_T;7_97938443_G_A;7_97929183_T_C;7_9792422…			0.19801980198019808	7	-1	97920963	98030380
ENSG00000006625	ENSG00000006625	ENST00000598361_GGCT	O75223	7_30715573_C_T	rs2014663	0.014290764756983	0.0005599167874413215	9.0	2.111274381099404e-06	-0.5260537256868514	0.41037359033767706	-0.1012108009412428	0.2325833035681848	-0.20491790521636946	0.06768983477795901	-0.1463904878984481	False	30715573,30712234,30714301,30718103,30718274,30718460,30719049,30729311								0.13861386138613865	7	-1	30536237	30591095
ENSG00000006634	ENSG00000006634	ENST00000413643_DBF4	Q9UBU7	7_87460030_C_T	rs10253106	0.0033333562681130443	0.00012727485045121114	8.0	2.5393170077039246e-06	-0.674951064682187	0.017998085731638632	-0.2439011698209269	0.8740543757627252	0.15813489588216134	0.28401802638423185	0.2133186510130658	True	87460030,87233602,87233989,87247779,87261736,87262581,87268456,87269497,87270500,87279856,87287394,87288324,87290865,87293223,87293493,87297469,87302140,87302835,87328003,87330101,87330423,87331275,87331316,87334384,87334634,87337759,87337779,87340481,87352349,87352948,87356903,87357866,87361543,87364097,87365282,87368731,87369685,87375095,87382936,87386604,87386669,87389052,87390330,87390464,873…				7_87505653_C_A;	7_87528502_G_A;7_87524860_G_T;7_87523791_G_C;7_87517648_T_A;7_87517427_C_T;7_87517135_G_A;7_87514832_T_C;7_87511396_A_C;7_87508464_G_A;	7_87528502_G_A;7_87524860_G_T;7_87523791_G_C;7_87517648_T_A;7_87517427_C_T;7_87517135_G_A;7_87514832_T_C;7_87511396_A_C;7_87508464_G_A;7_87505653_C_A;		0.054455445544554455	7	1	87505531	87538856
ENSG00000006652	ENSG00000006652	ENST00000489994_IFRD1	O00458-2	7_112089859_T_G	rs11764489	1.0814568628049657e-07	9.873922485913368e-10	16.0	8.313867451579062e-13	-0.8788321053014975	0.7613377069199445	0.02999991517027215	1.7063817810226891	-0.13670440841397458	0.7722769458157309	0.04616057996129752	False	112089859,112089060,112090279,112090290,112092347,112092683,112092944,112095013,112096880,112097121,112098196,112099561,112100178,112100218,112100770,112102600,112103392,112104130,112104400,112104568,112105628,112105869,112105893,112106009,112106511,112107887,112113077	7_112097121_C_T;	7_112105628_TTAA_T;7_112099561_CAT_C;		7_112098196_C_T;7_112092347_C_T;	7_112107887_A_G;7_112106511_C_T;7_112106009_A_G;7_112105893_G_T;7_112105869_G_T;7_112105628_TTAA_T;7_112104568_G_A;7_112104400_G_C;7_112104130_G_A;7_112103392_A_G;7_112102600_A_G;7_112100770_A_G;7_112100218_A_T;7_112099561_CAT_C;7_112098196_C_T;7_112097121_C_T;7_112096880_G_A;7_112095013_C_T;7_112092944_T_C;7_112092683_G_T;7_112092347_C_T;7_112090290_C_A;7_112090279_C_T;7_112089060_G_T;7_11208985…			0.13366336633663367	7	1	112063023	112121072
ENSG00000006704	ENSG00000006704	ENST00000424337_GTF2IRD1	Q9UHL9-3	7_73958795_T_C	rs2267819	0.00023477311997527358	8.173705423745116e-06	7.0	2.8431841790821716e-11	-0.7106479726017693	0.3901864254313915	-0.06906016322437739	0.3121881358045529	-0.6414988699395332	0.8489389797926025	-0.021200508543331442	False	73958795,73940610,73944185,73945273,73945542,73948950,73950964,73952169,73957406,73957407,73959331,73960533,73960785,73961089,73964235,73964757,73965411,73969541,73970840	7_73969541_A_G;	7_73961089_C_CAG;7_73957407_G_GGGT;7_73957406_C_CGGT;			7_73965411_T_C;7_73964235_A_G;7_73961089_C_CAG;7_73960785_T_C;7_73960533_A_C;7_73959331_A_G;7_73957407_G_GGGT;7_73957406_C_CGGT;7_73950964_T_C;7_73948950_A_G;7_73945542_C_A;7_73945273_A_G;7_73940610_T_C;7_73958795_T_C;		7_73944185_T_C;	0.2549504950495049	7	1	73868120	74016931
ENSG00000006740	ENSG00000006740	ENST00000538915_ARHGAP44	Q17R89-3	17_12856005_A_G	rs2072252	0.00029497262770879055	6.655035654343877e-06	11.0	6.901619080031339e-10	0.6911443737171327	0.945249750477922	-0.0053145790079944894	0.021014852445774074	0.06890190982186173	0.4590621136184104	-0.09104315102146754	False	12856005,12853633,12854399,12854755,12864158,12864342,12864608,12864779,12865215					17_12865215_G_A;17_12864779_T_C;17_12864608_T_C;17_12864342_T_C;17_12864158_A_G;17_12854755_G_T;17_12854399_A_G;17_12853633_A_G;17_12856005_A_G;	17_12865215_G_A;17_12864779_T_C;17_12864608_T_C;17_12864342_T_C;17_12864158_A_G;17_12854755_G_T;17_12854399_A_G;17_12853633_A_G;17_12856005_A_G;		0.14603960396039606	17	1	12692856	12894960
ENSG00000006744	ENSG00000006744	ENST00000583371_ELAC2	Q9BQ52	17_12914516_T_C	rs8072647	2.480086816893161e-09	1.4268432156874445e-11	21.0	2.2754081905126686e-16	0.9278123995521848	0.01834498364280542	-0.13534507825344771	0.5683361760200589	0.2289737616317315	0.4117703081161026	-0.07224481742452138	False	12914516,12914517					17_12914517_G_A;17_12914516_T_C;			0.2623762376237624	17	-1	12895708	12921504
ENSG00000007255	ENSG00000007255	ENST00000006275_TRAPPC6A	O75865	19_45672233_A_G	rs73564247	0.0060432295140513785	0.00039037187122053845	5.0	2.6359160733247004e-08	-0.5856320094895474	0.0007240159206101959	-0.2445499515186857	0.2031313994325712	-0.4447669766026845	0.2573476441460503	-0.14503410662613714	True	45672233,45657340,45658156,45659921,45664218,45665717,45667694,45668292,45671329,45672968,45674078,45679700,45680127,45680505,45681134,45681907,45682026,45683448,45684109,45685295,45685903,45687446					19_45681134_G_C;19_45680505_C_T;19_45679700_C_T;19_45674078_T_C;19_45672968_C_T;19_45671329_C_T;19_45668292_C_T;19_45667694_G_T;19_45672233_A_G;			0.14108910891089108	19	-1	45666186	45681495
ENSG00000007541	ENSG00000007541	ENST00000026218_PIGQ	Q9BRB3-2	16_629447_A_G	rs34523874	1.7966401105871348e-11	1.024900557086286e-13	16.0	8.980661217113099e-20	0.9226971172636632	1.6741225856819372e-06	-0.22765347791726184	0.34680732402264103	-0.13313634641502564	0.0022151991303199976	-0.469363465553049	True	629447,620709,621612,621673,622211,633764,641445,644048,644860,646421,646571,647006,648547,649672,651517,652248,653051,655262,661142,661451,664802,665811,667628,672040,673277,674024,674029,674737,675087,675215,677020,677629,678843,679274,680574,682566		16_621611_CGT_C;16_629427_CCTAGAGGTGCCCCGGGCCCAGAGA_C;16_629427_CCTAGAGGTGCCCCGGGCCCAGAGACTAGAGATGCCCCGGGCCCGGAGACTAGAGGTGCCCCGGGCCCGGAGA_C;		16_633764_G_A;16_620709_C_T;	16_622211_T_C;16_621673_C_T;16_621612_G_A;16_621611_CGT_C;16_620709_C_T;16_629447_A_G;16_629427_CCTAGAGGTGCCCCGGGCCCAGAGA_C;16_629427_CCTAGAGGTGCCCCGGGCCCAGAGACTAGAGATGCCCCGGGCCCGGAGACTAGAGGTGCCCCGGGCCCGGAGA_C;	16_629447_A_G;16_629427_CCTAGAGGTGCCCCGGGCCCAGAGA_C;16_629427_CCTAGAGGTGCCCCGGGCCCAGAGACTAGAGATGCCCCGGGCCCGGAGACTAGAGGTGCCCCGGGCCCGGAGA_C;		0.20297029702970296	16	1	616995	634136
ENSG00000008130	ENSG00000008130	ENST00000342348_NADK	O95544	1_1808755_A_T		0.002787450997319757	4.400203074920688e-05	19.0	1.9919436153251217e-08	0.4074672870417318	0.30715679536324336	0.07133039511364657	0.21304017574574585	0.33831214967145995	0.26809134230328885	-0.07413239693821305	False	1808755								0.4158415841584158	1	-1	1682671	1711896
ENSG00000008282	ENSG00000008282	ENST00000464029_SYPL1	Q16563-2	7_105715588_C_A	rs144484416	3.788831649292721e-15	3.810222371377648e-17	6.0	3.2504317856325206e-25	1.7081989569516132	0.8987411578227313	0.014080035807606868	0.01657546346016078	0.07472549429382047	0.12906708367199332	-0.22278567627463566	False	105715588,105710737,105718923,105733094,105738553,105751772,105753082,105753742,105755073,105756634	7_105733094_G_C;				7_105751772_T_C;7_105738553_T_C;7_105733094_G_C;			0.07920792079207921	7	-1	105730949	105753022
ENSG00000008294	ENSG00000008294	ENST00000511312_SPAG9	O60271	17_49054439_T_C	rs9332407	1.1970633426360439e-11	5.0486087139437285e-14	21.0	1.2279131748784325e-15	0.5464021613546028	0.9872100189369806	0.0006520861365352643	2.1363488294082704	0.2612264121738419	0.11660737978972273	0.15445924215452322	True	49054439,49067763,49102830,49166485		17_49102830_TA_T;			17_49166485_A_C;17_49102830_TA_T;17_49067763_T_C;17_49054439_T_C;	17_49067763_T_C;17_49054439_T_C;		0.4900990099009901	17	-1	49039535	49198226
ENSG00000008324	ENSG00000008324	ENST00000011691_SS18L2	Q9UHA2	3_42636141_G_A	rs4549	0.00012189796858047746	9.410221129732616e-06	3.0	1.3269440726668916e-10	0.4325455903651453	2.6107514956903345e-12	0.3957543868093804	0.5831219959045886	0.07636891610096365	0.8849837874612079	0.0178104025814787	False	42636141,42588598,42588822,42591051,42592319,42592874,42595115,42597217,42598980,42599234,42603485,42604548,42608030,42610374,42613278,42613846,42625215,42625216,42631420,42633498,42635384,42635633,42637664,42639452,42643425,42645143,42650393,42651319,42651465,42653656,42653858,42655046,42670449,42677836,42681445,42689777,42691970,42693126,42697286,42697605,42700630				3_42636141_G_A;	3_42635633_A_G;3_42635384_C_T;3_42633498_T_C;3_42631420_A_C;3_42625216_A_C;3_42625215_CA_TC;3_42625215_CA_TC;3_42625215_C_T;			0.33663366336633666	3	1	42623332	42636606
ENSG00000008394	ENSG00000008394	ENST00000542256_MGST1	P10620	12_16516710_T_C	rs3759207	1.7125060035407503e-15	5.527967051864468e-18	18.0	1.1511207910623211e-23	-0.8520901621414118	0.02752989883461537	0.13381233664096615	0.2518580003012235	-0.13824727261510672	0.6435006052650105	-0.040320728064389584	False	16516710,16514190,16514921,16515062,16515945,16516260,16517491,16517581,16521927,16522636,16524170,16529036,16529269,16533907,16538289,16538370,16538485,16538585,16538591,16538768,16539317,16539319,16539617,16539850,16540315,16540667,16540745,16540824,16540861,16544471,16547010,16549771,16552011,16564677		12_16529036_AT_A;		12_16529269_C_T;	12_16529036_AT_A;12_16524170_A_G;12_16522636_C_T;12_16521927_G_A;12_16517581_C_T;12_16517491_C_T;12_16516260_G_A;12_16515945_G_A;12_16515062_T_C;12_16514921_G_A;12_16514190_A_T;12_16516710_T_C;			0.3118811881188119	12	1	16500076	16762193
ENSG00000008516	ENSG00000008516	ENST00000336577_MMP25	Q9NPA2	16_3095818_A_G	rs3760080	0.0072515326629462515	0.0007957751087425138	3.0	2.6980100373841826e-07	0.3287088246281634	7.944521494878616e-07	0.31518179933980595	0.4570869842057595	0.34276636908384817	0.12277615969388328	0.15665166968908026	False	3095818,3091695,3094261,3096077,3096159,3096863,3097074,3097568,3097940				16_3096863_G_T;	16_3097940_A_C;16_3097568_C_A;16_3097074_C_T;			0.25742574257425743	16	1	3096682	3110727
ENSG00000008988	ENSG00000008988	ENST00000519807_RPS20	P60866	8_56986737_A_G	rs2976044	4.5235723329630736e-08	5.770430265846482e-10	11.0	1.06711424436005e-15	-0.4833821315409665	0.04711559789350421	0.13135174768353647	1.6886255603131606	-0.25817293029834604	0.9471395331863186	-0.008684581169733696	True	56986737,56892844,56894087,56894303,56894359,56896541,56897157,56897951,56898785,56903013,56903610,56906088,56906661,56907735,56925791,56929923,56930539,56932313,56932762,56934959,56937347,56940173,56941389,56941630,56941982,56942247,56944111,56944687,56946603,56948009,56948721,56949153,56949688,56949892,56950364,56950474,56952820,56953100,56953888,56954368,56955078,56955689,56956907,56957053,569…	8_56985814_T_C;			8_56985814_T_C;8_56980803_C_T;8_56980569_C_T;8_56986737_A_G;	8_56986417_A_G;8_56984392_T_C;8_56982015_A_G;8_56981824_C_A;8_56981649_G_A;8_56981194_G_A;8_56986737_A_G;		8_56985814_T_C;	0.19306930693069307	8	-1	56979854	56987069
ENSG00000009335	ENSG00000009335	ENST00000497368_UBE3C	Q15386	7_157070159_C_T	rs75894350	1.701473615718423e-05	4.2927086635097826e-07	8.0	5.644974000120035e-11	0.4457298776426861	0.2557440677991159	0.06460850235856458	0.2719480954117528	0.3968461405578585	0.5681226075105649	0.05162122380036127	False	157070159,157070044,157070045,157070800,157071200								0.2202970297029703	7	1	156931607	157062066
ENSG00000010165	ENSG00000010165	ENST00000362019_METTL13	Q8N6R0	1_171751051_A_G	rs2294719	2.503813770128623e-05	6.482615927423703e-07	8.0	1.1584764194109677e-10	-0.5656724039609909	1.6346474905009224e-07	-0.21208238160527068	1.3304980646307476	-0.190622457975749	0.4860512640280864	0.05738854011989925	False	171751051,171736136,171736254,171737431,171737544,171737736,171738369,171739430,171739939,171740003,171740792,171740946,171740952,171741572,171741919,171741953,171744099,171744136,171746048,171746262,171747760,171747830,171748774,171749665,171749809,171750003,171750471,171751236,171751416,171751723,171754378,171754799,171754865,171755489,171755597,171757477,171760567,171760620,171761820,171764771…				1_171751051_A_G;	1_171764771_G_A;1_171761820_TG_CA;1_171761820_T_C;1_171760620_A_G;1_171760567_T_C;1_171757477_T_G;1_171755597_A_G;1_171755489_T_C;1_171754865_A_G;1_171754799_G_A;1_171754378_G_A;1_171751723_C_T;1_171751416_G_A;1_171751236_T_C;1_171751051_A_G;		1_171751236_T_C;	0.3960396039603961	1	1	171750788	171783163
ENSG00000010270	ENSG00000010270	ENST00000453225_STARD3NL	O95772-2	7_38203783_G_T	rs60458730	1.7943867758380886e-06	3.930893166311974e-08	8.0	1.589676955014283e-10	-0.6221257265980363	0.11833184829392315	0.10119005321934234	0.6655177492019018	0.11565163861234053	0.6891728404957465	-0.05487467172837435	False	38203783,38209015,38217967,38218683,38220597,38220959,38227124,38229107,38232139,38233203,38237291,38238119,38239453,38241145,38242166,38246663,38251220,38253027,38253923,38265748				7_38217967_C_G;	7_38253923_C_A;7_38253027_G_C;7_38251220_A_G;7_38246663_C_A;7_38242166_T_A;7_38241145_A_G;7_38239453_G_A;7_38238119_A_G;7_38237291_A_C;7_38233203_A_G;7_38232139_G_A;7_38229107_A_G;7_38227124_C_T;7_38220959_A_C;7_38220597_A_G;7_38218683_A_G;			0.24504950495049505	7	1	38217824	38270272
ENSG00000010539	ENSG00000010539	ENST00000396870_ZNF200	P98182-3	16_3261955_G_A	rs8047557	0.06499666865339232	0.0027468011111695914	10.0	2.8028325471825937e-06	-0.4519636487225484	0.1946309473076563	-0.08767727732436739	0.7036899611301298	-0.10693127152355064	0.17151626327144842	-0.20931735233665227	False	3261955,3254470,3254972,3256678,3257324,3257591,3257644,3258632,3259452,3259673,3259823,3260005,3260038,3260056,3260851,3261089,3261270,3261311,3261530,3261539,3261751,3262445,3262550,3262991,3263081,3263119,3263638,3263937,3265055,3266071,3267536,3268077								0.4925742574257426	16	-1	3272325	3286221
ENSG00000010810	ENSG00000010810	ENST00000368678_FYN	P06241	6_112251458_A_C		0.042641296260973405	0.0005516987283823893	31.0	1.2444817851363953e-05	0.6051268512134245	0.18260286432772802	0.11141128321472643	0.4639118419000935	0.15242000586214632	0.6531604818598289	-0.060001786467772426	True	112251458,112243291,112250110								0.15594059405940594	6	-1	111981535	112194655
ENSG00000010818	ENSG00000010818	ENST00000012134_HIVEP2	P31629	6_143026868_A_T		0.04345758809020689	0.004367738064347423	4.0	1.3280047935863325e-05	0.3701126047688272	1.817967727001817e-05	0.28968603565419393			0.5584470357551135	0.1021786108636752	False	143026868,143028875,143030346								0.21287128712871287	6	-1	143072604	143266338
ENSG00000011021	ENSG00000011021	ENST00000346436_CLCN6	P51797	1_11850365_T_G	rs4846049	2.853133086576059e-05	6.618457393910589e-07	9.0	2.376570233363127e-10	-0.38938721530811465	4.075611320213476e-09	-0.4702758661799743	0.057426056528993616	-0.4768005483580087	0.0004587226363258218	-0.3412861839471644	False	11850365,11841945,11854476								0.37376237623762376	1	1	11866207	11903201
ENSG00000011114	ENSG00000011114	ENST00000334746_BTBD7	Q9P203	14_93805864_T_C	rs8006463	0.02731506499155088	0.001158743053432841	9.0	9.235463550002301e-08	-0.1811263679026672	5.0998867774765545e-08	-0.2556231509352188			0.5340919090311642	-0.07318070073476267	False	93805864,93702672,93707635,93707741,93711375,93715874,93715988,93716077,93720181,93721495,93721611,93722686,93724479,93724809,93731383,93731634,93735192,93736887,93736997,93738876,93739350,93739555,93745124,93761913,93762162,93767709,93767876,93768032,93769019,93772691,93772901,93775073,93776311,93778278,93783176,93783485,93783709,93783998,93784772,93785347,93785755,93785978,93785981,93787360,937…		14_93792090_C_CTATTA;14_93783709_CT_C;14_93778278_T_TACTTA;		14_93707741_T_C;14_93707635_A_G;	14_93797981_G_C;14_93796800_A_C;14_93796785_A_G;14_93795708_C_A;14_93795306_C_T;14_93792925_G_A;14_93792090_C_A;14_93792090_C_CTATTA;14_93788740_T_C;14_93787360_C_T;14_93785981_G_T;14_93785978_G_C;14_93785755_A_G;14_93785347_C_G;14_93784772_G_A;14_93783998_A_G;14_93783709_CT_C;14_93783485_A_G;14_93783176_T_C;14_93778278_T_TACTTA;14_93775073_T_C;14_93772901_A_T;14_93772691_C_G;14_93769019_T_C;14_9…			0.2871287128712871	14	-1	93703896	93799438
ENSG00000011243	ENSG00000011243	ENST00000594893_AKAP8L	Q9ULX6	19_15413671_T_C	rs76589360	0.04448445386926265	0.0008962816922847203	20.0	5.943495944494263e-06	-0.526236355673832	0.9122582423476971	0.00922930008947241	0.3073368852983094	-0.17541875569326226	0.1042647287008906	-0.046711479412708916	True	15413671,15387928,15441323								0.09158415841584157	19	-1	15490859	15529952
ENSG00000011295	ENSG00000011295	ENST00000475723_TTC19	Q6DKK2	17_15928584_T_G	rs2301652	1.3629916541037245e-09	1.4286558698580256e-11	11.0	2.359341158809889e-15	-0.7837490230622742	0.9286447280918292	0.005301451058501609	0.3063705483377086	-0.19220718378220114	0.035626101395489766	0.18194745590195133	False	15928584,15910286,15921168,15921419,15921569,15925734,15926033,15928885,15929467,15932627,15936270,15938690,15944208,15945946,15948963,15949099,15950198,15951471,15952588,15954906,15955491,15956140,15958402,15959714,15972081,15973844,15976558,15977005,15977132,15978404,15994554					17_15945946_A_G;17_15944208_A_T;17_15938690_G_A;17_15936270_A_G;17_15932627_T_C;17_15928885_A_G;17_15926033_T_C;17_15925734_A_G;17_15921419_G_A;17_15910286_A_G;17_15928584_T_G;	17_15928885_A_G;17_15926033_T_C;17_15925734_A_G;17_15921419_G_A;17_15910286_A_G;17_15928584_T_G;		0.4034653465346535	17	1	15902694	15948329
ENSG00000011304	ENSG00000011304	ENST00000586481_PTBP1	A0A087WUW5	19_797079_A_C	rs351974	2.529849566419685e-09	1.5368940261770966e-11	20.0	2.3769395009273288e-14	-0.6215109277029369	0.44468167911055	-0.06367160981110563	0.8119137937798937	-0.19248916188125464	1.0228786078383827	-0.03206784264129904	False	797079,798921,799342,806673				19_797079_A_C;	19_806673_T_C;19_799342_G_C;19_798921_T_C;			0.2326732673267327	19	1	797075	812327
ENSG00000011376	ENSG00000011376	ENST00000265537_LARS2	Q15031	3_45526812_A_G	rs12639021	8.947106764595712e-10	1.2601929370269776e-11	8.0	8.156518106555534e-22	-0.6553999202371735	1.0214512529060984e-25	-0.7141063330136159	2.8843577288980067e-07	-0.5718511006859792	1.1266775241874627e-09	-0.6593944782870698	False	45526812,45493876,45493941,45495358,45495927,45496144,45498342,45501088,45503903,45507305,45511026,45511266,45514884,45528423,45529692,45529896,45530401,45534973,45535941,45537973,45542083,45545451,45546577,45549298,45549807,45550661,45551898,45555044,45555700,45555765,45557003,45557707,45559621,45560113,45561149,45561203,45561487,45564003,45564439,45564879,45567557,45569582,45570065,45573466,455…		3_45577250_ACACACACACCCCCACACC_A;3_45495927_AAACT_A;3_45493876_AT_A;			3_45587983_A_G;3_45587111_G_A;3_45581959_C_G;3_45579699_T_C;3_45579533_T_A;3_45577250_ACACACACACCCCCACACC_A;3_45573541_A_G;3_45573466_T_G;3_45570065_A_G;3_45569582_A_G;3_45567557_G_A;3_45564879_G_T;3_45564439_A_T;3_45564003_G_A;3_45561487_C_T;3_45561203_A_G;3_45560113_A_G;3_45559621_C_T;3_45557003_C_T;3_45555765_C_T;3_45555700_A_G;3_45555044_C_A;3_45551898_C_T;3_45550661_C_T;3_45549807_G_A;3_4554…		3_45557707_G_A;	0.2797029702970297	3	1	45429998	45590913
ENSG00000011426	ENSG00000011426	ENST00000396068_ANLN	H7C1C2	7_36490598_G_T	rs3801303	2.546168134301739e-06	3.5062047847630845e-08	13.0	1.0406332716256377e-13	-0.5819811697322846	0.2437774692299359	-0.06145969241898264	0.2488702855309495	-0.4669643508380119	0.5649488297457298	-0.1101748449841119	False	36490598,36463335,36464536,36465570,36466043,36467441,36468373,36468539,36469600,36475812,36479420,36481482,36482551,36485485,36495986,36500407,36500417		7_36468373_A_AATAAAAGCA;			7_36485485_T_C;7_36481482_G_A;7_36479420_G_T;7_36475812_G_A;7_36469600_G_A;7_36468539_A_C;7_36468373_A_AATAAAAGCA;7_36467441_A_G;7_36466043_T_C;7_36465570_T_C;7_36464536_G_C;7_36463335_A_G;7_36490598_G_T;			0.4925742574257426	7	1	36429415	36493400
ENSG00000011478	ENSG00000011478	ENST00000012049_QPCTL	Q9NXS2	19_46190268_G_A	rs1964272	5.4651768818533345e-17	6.862004612301145e-19	4.0	3.9233204309208475e-19	-0.8136530474632842	2.3695418093072128e-24	-0.8780075000357448	0.0010155442898227584	-0.5184217878521724	0.0011618505750951296	-0.3881189095430946	False	46190268,46196634,46203083					19_46203083_G_A;19_46196634_C_G;	19_46196634_C_G;		0.4975247524752475	19	1	46195741	46207247
ENSG00000011485	ENSG00000011485	ENST00000478046_PPP5C	P53041	19_46847901_C_T	rs62136099	0.046285756307619434	0.001248315830983275	15.0	1.3824692401248015e-06	-0.4647893217517456	0.2432525924774621	-0.05610487372822965	1.2744206307246262	-0.3412234005803487	0.9968313214086492	-0.00023399712097393888	False	46847901,46849446,46849806,46854055,46856421,46857257,46858104,46859301,46860562,46862470,46868385,46877975,46878629,46878989,46882834,46883111,46883581,46884461,46886234,46887199,46889161,46889726,46891260,46892118,46894786		19_46889726_AG_A;19_46884461_GT_G;19_46883581_GA_G;			19_46894786_C_T;19_46892118_C_G;19_46891260_C_T;19_46889726_AG_A;19_46889161_G_A;19_46887199_A_G;19_46886234_G_A;19_46884461_GT_G;19_46883581_GA_G;19_46882834_C_T;19_46878629_G_A;19_46877975_C_T;19_46868385_A_G;19_46862470_A_T;19_46860562_C_A;19_46859301_G_C;19_46858104_A_G;19_46857257_G_A;19_46856421_G_A;19_46854055_C_T;	19_46894786_C_T;19_46892118_C_G;19_46891260_C_T;19_46889726_AG_A;19_46889161_G_A;19_46887199_A_G;19_46886234_G_A;19_46884461_GT_G;19_46883581_GA_G;19_46882834_C_T;19_46878989_G_A;19_46878629_G_A;19_46877975_C_T;19_46868385_A_G;19_46862470_A_T;19_46860562_C_A;19_46859301_G_C;19_46858104_A_G;19_46857257_G_A;19_46856421_G_A;19_46854055_C_T;	19_46878989_G_A;	0.3094059405940594	19	1	46850251	46896238
ENSG00000011523	ENSG00000011523	ENST00000377990_CEP68	Q76N32	2_65280185_A_G	rs2723063	6.5471745954574614e-15	6.827995147775757e-17	6.0	6.3228416368869896e-24	0.5359683850409579	1.0559290713128014e-28	0.7239638284246879	1.6349776991649606e-06	0.5112795492140029	0.00044412805557247556	0.3611118568315541	False	65280185,65276049,65276452,65276736,65277951,65279414,65279805,65283972,65284156,65284231,65290842,65291546					2_65291546_A_G;2_65290842_C_A;2_65284231_A_T;2_65284156_C_A;2_65283972_T_C;			0.405940594059406	2	1	65283500	65314138
ENSG00000011638	ENSG00000011638	ENST00000573688_TMEM159	I3NI21	16_21188649_G_A	rs2204997	1.427775274585063e-48	7.463735458768193e-53	9.0	1.5020308411543172e-45	-1.4298405390235844	9.137010671939533e-12	0.7260765824044304	0.0018504727091945862	0.3213445631118159	0.00144414245492094	0.3065356602317342	False	21188649,21185384,21189950,21190853,21191611,21192098,21197232,21198496,21198817,21198987	16_21190853_A_C;16_21185384_G_A;			16_21191611_T_C;16_21190853_A_C;	16_21189950_A_G;16_21185384_G_A;16_21188649_G_A;	16_21190853_A_C;16_21189950_A_G;16_21185384_G_A;16_21188649_G_A;		0.2871287128712871	16	1	21169698	21191937
ENSG00000012048	ENSG00000012048	ENST00000357654_BRCA1	P38398-4	17_41328095_A_G	rs4239149	0.016138601499803118	0.00018633097473801568	31.0	5.061444328350663e-06	-0.229494159742385	1.632781459531163e-11	-0.5125686618795624	0.07747791035074908	-0.4811581127121266	0.01698814526971786	-0.24895778342819275	True	41328095,41173226,41174025,41176688,41176831,41179864,41181297,41181746,41181835,41181898,41182662,41186030,41187567,41187684,41187974,41188342,41188786,41189045,41189383,41190715,41191129,41192016,41193910,41194885,41195025,41195711,41195773,41196408,41197274,41198621,41199913,41200109,41200537,41200704,41201702,41202688,41203591,41204377,41204390,41205772,41205941,41206056,41206761,41209578,412…	17_41244936_G_A;17_41244435_TCTTTAA_T;17_41244435_T_C;17_41244000_T_C;17_41223094_T_A;	17_41274905_AG_A;17_41271293_GA_G;17_41267518_CA_C;17_41250678_C_CT;17_41249363_TA_T;17_41249363_TA_T;17_41247604_AAAAC_A;17_41247122_A_ACCT;17_41244935_CGG_C;17_41244935_CG_CAA;17_41244435_TCTTTAA_T;17_41243998_CTT_C;17_41242075_A_AAAG;17_41242075_AAAG_A;17_41241568_T_TC;17_41234469_AAG_A;17_41230105_CT_C;17_41229760_AT_A;17_41226736_GGGGTT_G;17_41226734_ATGGGGT_A;17_41223093_CT_C;17_41214209_CA…		17_41245466_G_A;17_41245237_A_G;17_41244936_G_A;17_41244935_CGG_C;17_41244935_CG_CAA;17_41244435_TCTTTAA_T;17_41244435_T_C;17_41244000_T_C;17_41243998_CTT_C;17_41234470_A_G;17_41234469_AAG_A;17_41223094_T_A;17_41223093_CT_C;17_41197274_C_A;17_41196408_G_A;	17_41277187_G_C;17_41276348_T_C;17_41276247_A_G;17_41275645_A_G;17_41275151_G_C;17_41274906_G_A;17_41274905_AG_A;17_41274778_G_A;17_41273537_A_C;17_41273348_T_C;17_41271293_GA_G;17_41270666_C_A;17_41270463_G_A;17_41270277_C_T;17_41270229_T_G;17_41268206_A_C;17_41267518_C_A;17_41267518_CA_C;17_41267050_G_A;17_41265776_A_G;17_41264364_A_G;17_41264146_G_A;17_41263566_T_C;17_41263044_A_G;17_41261233_…	17_41277187_G_C;17_41276348_T_C;17_41276247_A_G;17_41275645_A_G;17_41275151_G_C;17_41274906_G_A;17_41274905_AG_A;17_41274778_G_A;17_41273537_A_C;17_41273348_T_C;17_41271293_GA_G;17_41270666_C_A;17_41270463_G_A;17_41270277_C_T;17_41270229_T_G;17_41268206_A_C;17_41267518_C_A;17_41267518_CA_C;17_41267050_G_A;17_41265776_A_G;17_41264364_A_G;17_41264146_G_A;17_41263566_T_C;17_41263044_A_G;17_41261233_…	17_41245466_G_A;17_41245237_A_G;17_41234470_A_G;	0.3316831683168317	17	-1	41196312	41277500
ENSG00000012061	ENSG00000012061	ENST00000589165_ERCC1	P07992	19_45927610_A_G	rs3212930	0.014594879759837918	0.000303744436032992	17.0	3.1938490354813593e-08	0.5827398174595606	2.1125095082060474e-06	0.3884288133835817	0.07392707297591734	0.16039568267202298	0.5989082440341504	-0.06017623584508125	True	45927610,45928703,45933201				19_45927610_A_G;	19_45933201_C_A;19_45928703_A_G;19_45927610_A_G;			0.2524752475247525	19	-1	45910591	45982086
ENSG00000012660	ENSG00000012660	ENST00000370913_ELOVL5	Q9NYP7	6_53123958_C_T		0.00035398396027611317	1.1111440766724032e-05	8.0	5.586691976280183e-09	-0.9188728406546292	2.4223908465194725e-06	0.6271990734920132			0.786326751375991	0.05756157586034585	False	53123958,53103626,53108676,53108682,53109761,53109956,53109958,53110301,53110486,53110684,53110954,53111466,53111497,53111504,53111517,53111597,53111712,53111758,53112290,53112374,53112652,53112991,53113145,53113320,53113448,53113554,53113570,53114186,53114417,53114498,53115190,53115621,53117872,53118091,53122053,53125994,53126116,53126837,53127252,53128039,53128143,53129261,53130222,53131343,531…		6_53163175_AACTT_A;			6_53176537_C_T;6_53171621_C_T;6_53169941_C_T;6_53167352_G_C;6_53166993_G_C;6_53163175_AACTT_A;6_53159576_T_C;6_53159399_T_C;6_53159090_G_T;6_53158195_A_G;6_53158052_G_A;6_53156464_A_C;6_53148841_C_T;6_53148251_T_C;6_53148019_T_C;6_53147972_G_A;6_53144016_T_C;6_53136261_T_C;		6_53159090_G_T;	0.056930693069306926	6	-1	53132196	53213947
ENSG00000012963	ENSG00000012963	ENST00000416753_UBR7	Q8N806	14_93666380_A_G	rs1263387	0.00015803603295740613	4.672583837293339e-06	8.0	1.655609976172415e-14	0.4303335107149139	2.522487652811621e-08	0.3554561015346921	0.12634726105606098	0.5856322736836371	0.5485942593341983	-0.050977452321633976	False	93666380,93667525,93667720,93682589,93688056,93688307,93690301,93693422,93693831,93696317				14_93693831_C_T;14_93693422_C_T;	14_93690301_A_G;14_93688307_A_T;14_93688056_C_G;14_93682589_A_G;	14_93693422_C_T;14_93690301_A_G;14_93688307_A_T;14_93688056_C_G;14_93682589_A_G;		0.30445544554455445	14	1	93673401	93695561
ENSG00000012983	ENSG00000012983	ENST00000554273_MAP4K5	A0A0A0MQR1	14_50905791_G_T	rs10142538	4.3006322588236934e-07	6.818692407544504e-09	10.0	1.0528679633872985e-13	-0.8175792619349075	0.600513678822572	0.04101035479074062	0.4768031979048945	-0.4407015693110217	0.4840317608581022	-0.08099918507080027	False	50905791,50982983,50999181,51000770,51079426,51135226				14_50999181_C_T;	14_51000770_C_T;14_50999181_C_T;14_50982983_C_T;14_50905791_G_T;	14_50982983_C_T;		0.16336633663366334	14	-1	50885219	51027844
ENSG00000013016	ENSG00000013016	ENST00000322054_EHD3	Q9NZN3	2_31496658_T_C	rs644417	0.06298342733811413	0.013223408350803779	2.0	2.554636277549626e-06	-0.3268542840651692	2.9104908888518e-05	-0.3322033740100632	0.16963869855978594	-0.04379060502059184	0.9031465256179176	0.01079165062387899	False	31496658,31492769,31493484,31493643,31494428,31496678,31496984,31497047,31498040,31498317,31499064,31507676,31509055,31509523,31509629,31512482,31514477,31516120								0.2524752475247525	2	1	31456880	31492313
ENSG00000013374	ENSG00000013374	ENST00000470316_NUB1	H3BM14	7_151048484_G_A	rs449081	0.0008563776921279906	1.6562333629722707e-05	14.0	2.75539592845223e-10	0.6488477675254894	0.009211827205470393	-0.23025903361847666	0.16816153153090052	0.3358067794746327	0.03341947152826079	-0.13453356869749378	False	151048484,151044035,151044504,151046022,151046832,151047001,151047947,151048012,151049025,151049231,151050158,151052147,151052297,151052699,151053043	7_151049231_C_T;		7_151053043_A_G;		7_151053043_A_G;7_151052699_T_C;7_151052297_C_T;7_151052147_G_A;7_151050158_T_C;7_151049231_C_T;7_151049025_T_C;7_151048012_A_G;7_151047947_A_G;7_151047001_C_G;7_151046832_A_G;7_151046022_A_G;7_151044504_G_A;7_151044035_G_A;7_151048484_G_A;	7_151053043_A_G;7_151052699_T_C;7_151052297_C_T;7_151052147_G_A;7_151050158_T_C;7_151049231_C_T;7_151049025_T_C;7_151048012_A_G;7_151047947_A_G;7_151047001_C_G;7_151046832_A_G;7_151046022_A_G;7_151044504_G_A;7_151044035_G_A;7_151048484_G_A;		0.3217821782178218	7	1	151038785	151075535
ENSG00000013375	ENSG00000013375	ENST00000507554_PGM3	O95394	6_83868735_T_A		0.02142160120035877	0.0005651092832705459	14.0	7.84514076132357e-06	-0.3952320017854128	0.3189978142056251	-0.05699206943016584	1.172064213979278	-0.1689787555615645	0.012628856250532259	-0.13926200177953607	False	83868735,83780469,83782301,83782947,83784072,83785286,83785869,83786338,83786469,83786518,83789558,83789827,83792261,83803514,83804153,83810053,83811578,83812218,83814435,83815235,83820434,83821694,83828254,83828724,83835175,83836995,83840972,83841771,83843743,83846149,83852191,83852984,83854166,83854679,83859194,83862873,83863583,83868788,83873071,83877496,83880167,83880274,83881273,83881740,838…	6_83880167_C_T;	6_83896510_TCTC_T;6_83896510_TCTCCT_TCTC;6_83896509_ATC_A;		6_83877496_T_C;	6_83896633_T_A;6_83896510_TCTC_T;6_83896510_TCTCCT_TCTC;6_83896509_ATC_A;6_83894258_A_C;6_83893468_G_A;6_83890405_A_G;6_83888772_G_A;6_83887495_T_C;6_83884734_T_C;6_83881273_A_G;6_83880274_C_T;6_83877496_T_C;6_83873071_A_G;	6_83896633_T_A;6_83896510_TCTC_T;6_83896510_TCTCCT_TCTC;6_83896509_ATC_A;6_83894258_A_C;6_83893468_G_A;6_83881273_A_G;6_83880274_C_T;6_83880167_C_T;6_83877496_T_C;6_83873071_A_G;	6_83881740_T_C;	0.2277227722772277	6	-1	83870869	83903655
ENSG00000013503	ENSG00000013503	ENST00000228347_POLR3B	Q9NW08	12_106912219_G_A	rs4522273	0.003201885797007537	0.00024328607678979872	4.0	3.373439777859381e-06	-0.23864758272406925	8.038416471948752e-11	-0.3831552520916751	1.5779784746343586	-0.3065980890803379	0.13540086004773513	-0.15533249525329176	False	106912219,106736097,106739726,106741767,106751805,106751875,106751910,106756612,106759456,106763912,106777240,106779896,106780188,106782548,106783973,106785122,106785502,106790564,106807350,106807882,106808320,106808486,106819477,106829279,106832059,106832618,106834833,106837600,106840620,106842980,106847612,106848698,106852056,106855733,106856038,106859465,106860960,106861711,106873123,106878029…		12_106884479_GA_G;12_106856037_TC_T;12_106832618_C_CA;12_106807882_GCCAT_G;12_106751910_GAGTGA_G;		12_106751910_GAGTGA_G;12_106751875_C_T;	12_106901211_G_A;12_106900305_G_A;12_106897614_A_G;12_106884480_A_G;12_106884479_GA_G;12_106880963_T_C;12_106880836_C_T;12_106880726_A_G;12_106878029_C_T;12_106873123_T_C;12_106861711_G_T;12_106860960_G_A;12_106859465_C_T;12_106856038_C_T;12_106856037_TC_T;12_106855733_C_T;12_106852056_A_G;12_106848698_A_G;12_106847612_G_A;12_106842980_G_A;12_106840620_CA_TG;12_106840620_C_T;12_106837600_A_G;12_1…			0.2549504950495049	12	1	106751436	106903976
ENSG00000013523	ENSG00000013523	ENST00000251089_ANGEL1	Q9UNK9	14_77282104_A_G	rs72737540	0.0018160911740489067	8.711626877788901e-05	6.0	3.4196321505391034e-09	0.299196161217255	2.8017990861698413e-08	0.3120242986406499	0.2356994242134424	0.1718919275205617	0.10746830252392882	0.14626353281540627	False	77282104,77274018,77274852,77278483					14_77278483_T_C;14_77274852_T_C;14_77274018_C_T;14_77282104_A_G;	14_77278483_T_C;		0.20544554455445546	14	-1	77253588	77292589
ENSG00000013573	ENSG00000013573	ENST00000407793_DDX11	Q96FC9-3	12_31213631_C_T	rs4537846	1.7346298709431033e-28	6.375815510111972e-32	32.0	9.253733519467732e-45	-1.199998175628858	2.8685115001357127e-16	-0.4941648551142032	0.16464885802600246	0.18849157519263549	0.009481835675929485	0.2373197397514528	True	31213631,31213052,31213644,31213735,31214179,31215030,31218038,31221072,31221455,31222178,31222479,31222713,31223277,31223322,31223430,31223471,31224337,31224540,31224665,31224851,31225009,31225099,31225205,31225213,31225230,31225344,31225385,31225411,31225474,31225778,31225839,31226440,31226835,31227175,31227461,31227480,31227521,31228738,31229317,31229369,31229415,31229428,31229485,31230223,312…	12_31256905_T_C;12_31256546_G_A;	12_31245502_CT_C;12_31243423_TC_T;12_31233537_GA_G;12_31229415_TA_T;12_31227175_ACAG_A;	12_31240925_A_G;	12_31257695_T_C;12_31257464_G_A;12_31257327_T_C;12_31256905_T_C;12_31256546_G_A;12_31253995_C_T;12_31242440_A_G;12_31242399_T_C;12_31227175_ACAG_A;12_31226835_T_A;	12_31256546_G_A;12_31256368_G_T;12_31256342_G_A;12_31256220_A_G;12_31256219_CA_TG;12_31256219_CA_TG;12_31256219_C_T;12_31256164_G_T;12_31256075_G_A;12_31255654_A_G;12_31255626_T_C;12_31254959_C_T;12_31254752_C_T;12_31254701_G_T;12_31254522_T_C;12_31254317_C_A;12_31254256_C_T;12_31254221_T_G;12_31252886_C_T;12_31251803_G_A;12_31251544_C_T;12_31251070_G_A;12_31250669_G_A;12_31248336_G_A;12_31247986…	12_31257695_T_C;12_31257464_G_A;12_31257327_T_C;12_31256905_T_C;12_31256546_G_A;12_31256368_G_T;12_31256342_G_A;12_31256220_A_G;12_31256219_CA_TG;12_31256219_CA_TG;12_31256219_C_T;12_31256164_G_T;12_31256075_G_A;12_31255654_A_G;12_31255626_T_C;12_31254959_C_T;12_31254752_C_T;12_31254701_G_T;12_31254522_T_C;12_31254317_C_A;12_31254256_C_T;12_31254221_T_G;12_31253995_C_T;12_31252886_C_T;12_31251803…	12_31256546_G_A;12_31253995_C_T;12_31242399_T_C;	0.4777227722772277	12	1	31226779	31257725
ENSG00000013583	ENSG00000013583	ENST00000014930_HEBP1	Q9NRV9	12_13154077_C_T	rs67498669	1.9231414601185503e-10	4.925476981190477e-12	4.0	1.3270509744624598e-18	-0.6902459016198738	2.8044662229166967e-18	-0.6741682078883111	0.0003826641681626608	-0.3810215351217901	8.728079471563177e-07	-0.4839698183000176	False	13154077,13145613,13146497,13146967,13154105,13154123,13155339,13165945,13169377,13169435,13173819,13174949,13175607,13176226,13176310,13177066,13177289,13177941,13178072,13178155,13178751,13178843,13178961,13178994,13179001,13179236,13179433,13179448,13179701,13179704,13183951					12_13146967_C_A;12_13146497_T_C;12_13145613_C_T;			0.3589108910891089	12	-1	13127798	13153207
ENSG00000013810	ENSG00000013810	ENST00000485989_TACC3	Q9Y6A5	4_1716693_T_C	rs2854918	6.812624412390357e-18	3.044927401444761e-20	10.0	1.861351906357647e-34	-1.165464900306725	0.5916345709581052	-0.03147509837238824	1.4565370369754458	-0.2498495756549919	0.9367747301599808	-0.006768172115423354	True	1716693,1716604,1716770,1717171,1731621,1748069					4_1731621_T_C;			0.3589108910891089	4	1	1723227	1746898
ENSG00000014138	ENSG00000014138	ENST00000265465_POLA2	Q14181	11_65017277_T_A	rs1212391	0.004229429296153603	0.0001460329883221963	9.0	1.524831401213246e-08	0.5694944836484852	3.856045752373079e-12	0.7441159518997338	0.1962249656255943	0.3461388555481659	0.08352995544213028	0.23329803591489065	True	65017277,65001046,65001679,65003026,65003197,65003812,65005482,65005886,65008771,65008917,65011466,65012857,65012974,65014843,65016173,65016408,65016838,65021612,65025878,65026462,65026590,65027808,65030189,65033874,65036835,65039241,65039264,65042530,65042941,65045278,65045615,65045725,65046984,65049278,65050182,65060427,65063553,65064690,65064918,65069275,65069534,65078626,65082673,65086145,650…	11_65064690_G_A;	11_65046984_CT_CTT;11_65046984_C_CC;		11_65064918_C_G;11_65063553_A_T;	11_65069534_A_C;11_65069275_G_C;11_65064918_C_G;11_65064690_G_A;11_65063553_A_T;11_65060427_G_A;11_65050182_T_C;11_65049278_A_G;11_65046984_CT_CTT;11_65046984_C_CC;11_65045725_G_T;11_65045615_T_C;11_65045278_T_G;11_65042941_A_G;11_65042530_A_C;11_65039264_T_C;11_65039241_T_C;11_65036835_G_A;11_65033874_T_C;11_65030189_C_G;	11_65063553_A_T;11_65060427_G_A;11_65050182_T_C;11_65049278_A_G;11_65046984_CT_CTT;11_65046984_C_CC;11_65045725_G_T;11_65045615_T_C;11_65045278_T_G;11_65042941_A_G;11_65042530_A_C;11_65039264_T_C;11_65039241_T_C;11_65036835_G_A;11_65033874_T_C;11_65030189_C_G;		0.14603960396039606	11	1	65029233	65073060
ENSG00000014164	ENSG00000014164	ENST00000262577_ZC3H3	Q8IXZ2	8_144562110_G_C	rs405035	0.02973377237966117	0.005739016757824509	2.0	1.4867499072369934e-05	-0.2592845240712445	0.0002932829380342629	-0.21990329086135105	0.0041065728278338615	-0.6707400888239727	0.8546501694137504	-0.01903881816832048	False	144562110,144571710,144620342,144621084,144621931,144624128,144625634,144628514,144629194,144630169	8_144621084_T_G;8_144620342_T_C;				8_144621931_T_C;8_144571710_C_G;8_144562110_G_C;			0.3415841584158416	8	-1	144519825	144623623
ENSG00000014216	ENSG00000014216	ENST00000533079_CAPN1	P07384	11_64972354_A_T	rs2271450	0.03689802058700762	0.0005216392706509971	28.0	9.346163766518477e-07	-0.4322338181667337	0.0008475864174643113	-0.1871696528345641	1.6679898633140982	-0.4851647687416687	0.7758377805012361	0.027293321009029814	True	64972354					11_64972354_A_T;			0.4034653465346535	11	1	64948037	64979477
ENSG00000014641	ENSG00000014641	ENST00000462944_MDH1	P40925	2_63908025_A_T	rs262538	0.07681649167165087	0.001953709323653871	17.0	5.656981154076112e-06	-0.4123236838356197	0.41101387587295657	0.060032350753281324	0.04502674538289035	-0.21937637708164195	0.09167008747316016	0.12793467308279016	False	63908025,63628544,63637091,63639529,63644303,63650582,63654140,63658293,63661280,63669625,63672071,63674060,63678589,63680357,63686004,63687700,63691478,63694805,63698162,63716223,63719212,63720210,63720906,63722433,63724795,63726791,63726932,63731575,63731682,63732509,63734284,63736605,63737238,63740614,63741122,63741548,63742810,63742880,63743775,63745742,63748284,63749833,63751436,63753095,637…				2_63820398_C_T;	2_63833813_G_T;2_63833616_G_A;2_63832776_G_A;2_63830869_G_A;2_63830559_C_T;2_63828361_G_A;2_63826932_C_A;2_63826528_T_G;2_63825934_T_C;2_63825404_C_A;2_63824050_A_T;2_63824049_CA_GT;2_63824049_CA_GT;2_63824049_C_G;2_63822785_T_C;2_63820398_C_T;2_63818314_C_G;2_63817440_A_G;2_63817422_G_T;2_63816776_T_C;2_63816672_C_G;	2_63830869_G_A;2_63830559_C_T;2_63828361_G_A;2_63826932_C_A;2_63826528_T_G;2_63825934_T_C;2_63825404_C_A;2_63824050_A_T;2_63824049_CA_GT;2_63824049_CA_GT;2_63824049_C_G;2_63822785_T_C;2_63820398_C_T;2_63818314_C_G;2_63817440_A_G;2_63817422_G_T;2_63816776_T_C;2_63816672_C_G;		0.2623762376237624	2	1	63815743	63834331
ENSG00000014824	ENSG00000014824	ENST00000509683_SLC30A9	Q6PML9	4_42037009_A_G	rs11730171	1.6936236693889323e-17	1.613544074576612e-19	5.0	2.642075222290756e-27	0.985508420036858	5.6196585625264416e-08	-0.3859091949954211	0.013573566277637856	0.055543237137601335	0.019168416840400646	-0.21472525721123328	False	42037009,41935684,41953081,41956413,41963282,42008243,42011970,42017500,42018820,42018944,42033414,42036458,42037608,42039082,42040056,42041692,42043304,42043387,42043803,42049235,42050538,42050768,42051038,42056147,42057139,42058286,42063690,42065293,42068230,42069029,42072219,42073999,42074565,42074633,42075137,42075354,42084252,42089177,42091257,42091491,42091583,42094015,42094638,42096000,420…		4_42084252_TAAATA_T;4_42073999_TTGTC_T;4_42050538_GC_G;4_42039082_AT_A;4_42039081_GA_G;4_42036458_CG_C;4_42018812_GTCTATCTA_G;		4_42091583_C_T;4_42091491_G_C;4_42091257_C_T;4_42089177_G_A;	4_42084252_TAAATA_T;4_42075354_T_C;4_42075137_C_T;4_42074633_A_G;4_42074565_G_A;4_42073999_TTGTC_T;4_42072219_T_G;4_42069029_T_C;4_42068230_A_G;4_42065293_C_T;4_42063690_G_A;4_42063689_TG_CA;4_42058286_T_C;4_42057139_A_G;4_42056147_G_A;4_42051038_G_T;4_42050768_A_G;4_42050538_GC_G;4_42049235_A_G;4_42043803_C_G;4_42043387_C_T;4_42043304_G_A;4_42041692_A_T;4_42040056_T_C;4_42039082_AT_A;4_42039081_…	4_42084252_TAAATA_T;4_42075354_T_C;4_42075137_C_T;4_42074633_A_G;4_42074565_G_A;4_42073999_TTGTC_T;4_42072219_T_G;4_42069029_T_C;4_42068230_A_G;4_42065293_C_T;4_42063690_G_A;4_42063689_TG_CA;4_42058286_T_C;4_42057139_A_G;4_42056147_G_A;4_42051038_G_T;4_42050768_A_G;4_42050538_GC_G;4_42049235_A_G;4_42043803_C_G;4_42043387_C_T;4_42043304_G_A;4_42041692_A_T;4_42040056_T_C;4_42039082_AT_A;4_42039081_…		0.2821782178217821	4	1	41992489	42092474
ENSG00000015475	ENSG00000015475	ENST00000473439_BID	P55957	22_18209718_C_T	rs2535688	0.01879824451083788	0.000681884098699412	10.0	1.6327004707846775e-07	0.6676046903117951	0.10782798350705156	-0.14479200690058236	1.8212041289873349	0.3245675024051111	0.9423604642192523	0.008814468388730123	True	18209718,18123678,18123806,18124976,18125463,18126743,18127300,18129135,18129651,18129942,18130209,18132928,18134240,18135184,18136695,18136803,18138879,18139510,18140862,18145011,18146206,18146619,18149037,18149764,18153009,18153912,18154053,18154878,18156161,18158344,18159102,18160633,18161543,18162305,18165995,18166741,18166806,18167859,18168703,18168774,18169672,18169975,18170352,18170378,181…		22_18217833_A_AAGAT;		22_18220831_A_G;22_18217833_A_AAGAT;	22_18231866_G_A;22_18230954_G_T;22_18228653_A_C;22_18227688_C_T;22_18226997_C_G;22_18224781_C_T;22_18222089_C_A;		22_18220831_A_G;	0.1485148514851485	22	-1	18216906	18257536
ENSG00000015479	ENSG00000015479	ENST00000506188_MATR3	B3KM87	5_138701120_A_C	rs6895170	3.68064167918081e-08	1.1095794697294179e-10	46.0	3.613458643312671e-13	-0.7224961019940124	0.21580069914863764	0.06366183678063972	1.830170264191908	-0.21969594142926208	0.656140779897916	-0.0414501891608845	False	138701120,138569655,138571499,138576800,138584111,138588162,138588282,138594482,138594955,138597020,138598654,138598669,138604422,138605951,138609609,138614277,138618797,138619224,138622686,138626159,138627349,138628078,138632030,138637444,138637541,138638139,138642997,138643062,138654173,138656643,138656848,138657471,138657944,138658846,138659893,138660359,138665756,138666372,138668186,138668704…		5_138657471_CAAAAAAG_C;5_138643061_AT_A;		5_138666372_T_G;5_138665756_G_A;5_138643062_T_A;5_138643061_AT_A;	5_138660359_C_G;5_138659893_A_G;5_138658846_T_G;5_138657944_C_A;5_138657471_CAAAAAAG_C;5_138656848_G_T;5_138656643_T_G;5_138654173_T_G;5_138643062_T_A;5_138643061_AT_A;5_138638139_T_C;5_138637541_G_A;5_138637444_G_A;5_138632030_G_T;			0.3143564356435644	5	1	138609441	138667360
ENSG00000015532	ENSG00000015532	ENST00000017003_XYLT2	Q9H1B5	17_48432681_G_A	rs2526538	0.02540945045041228	0.0013726414490384696	7.0	1.5132916752848822e-07	-0.33451943827467984	1.0012240358935823e-10	-0.37469884672861775	1.0884243022393747	-0.1470932774189091	0.07178441630995043	0.17760279666206724	False	48432681,48408836,48416268,48417221,48418710,48419660,48422838,48423955,48424944,48425967,48427191,48429932,48430291,48430694,48433081,48433958,48438055,48441589,48445674,48449270,48450227,48452978,48454453,48458925				17_48438055_G_T;	17_48438055_G_T;17_48433081_G_A;17_48430694_G_A;17_48430291_C_T;17_48429932_A_G;17_48427191_C_T;17_48425967_T_G;17_48423955_G_T;17_48432681_G_A;	17_48438055_G_T;17_48433958_T_C;17_48433081_G_A;17_48430694_G_A;17_48430291_C_T;17_48429932_A_G;17_48427191_C_T;17_48425967_T_G;17_48423955_G_T;17_48432681_G_A;	17_48433958_T_C;	0.4430693069306931	17	1	48423453	48440499
ENSG00000015568	ENSG00000015568	ENST00000016946_RGPD5	Q99666	2_110470151_G_A	rs4953769	0.014165441562339646	0.0003835945080441033	13.0	1.985960912148559e-06	-0.26909944988563805	9.709529042837448e-08	-0.41516560702675936	0.37514764431591496	0.1789866151846946	0.1822989488820316	0.177151408715082	False	110470151,110465111,110465221,110473825,110481801,110484028,110487446,110491474								0.2945544554455445	2	1	110550335	110615272
ENSG00000015676	ENSG00000015676	ENST00000460110_NUDCD3	Q8IVD9	7_44551157_T_C	rs73107454	4.3858601886063184e-11	3.8502076675496527e-13	11.0	4.650878966655801e-15	0.6132892793990601	5.628883511271373e-17	0.4740521299100946	0.005873819920289479	0.4938524791815517	5.753260008274991e-07	0.416864036387846	True	44551157,44377654,44378014,44378204,44379065,44381979,44382528,44383413,44383921,44385761,44388494,44390020,44390062,44392321,44400529,44400672,44402376,44403107,44403843,44405285,44406600,44407968,44408133,44408595,44408617,44408813,44409474,44411028,44411404,44412735,44412789,44413501,44413814,44414158,44414799,44415584,44415692,44415700,44415759,44416166,44419168,44419191,44420147,44420238,444…	7_44444122_G_A;	7_44516624_AT_A;7_44480148_AT_A;7_44479488_GCTAA_G;7_44474691_CTTT_C;7_44443144_CT_C;7_44436550_TTG_T;7_44436549_TTTG_T;7_44435267_ACA_A;7_44428860_GAC_G;		7_44424983_T_C;7_44422074_A_G;7_44421489_C_G;7_44420651_A_G;7_44420639_C_A;7_44420362_A_G;7_44420238_A_G;7_44420147_G_C;7_44419191_C_T;7_44419168_A_G;	7_44529726_G_A;7_44529662_G_A;7_44528426_G_A;7_44526475_T_C;7_44525803_C_G;7_44525374_C_T;7_44524200_C_G;7_44523651_C_G;7_44522617_T_C;7_44520258_T_A;7_44520234_A_C;7_44518053_A_G;7_44517210_G_A;7_44516624_AT_A;7_44513781_C_A;7_44513558_C_G;7_44513444_A_G;7_44510837_G_A;7_44510076_T_A;7_44510024_C_T;7_44509699_G_T;7_44509119_T_C;7_44509037_G_A;7_44504177_T_C;7_44504112_G_A;7_44501347_C_T;7_445004…			0.2153465346534653	7	-1	44418720	44530479
ENSG00000016391	ENSG00000016391	ENST00000315251_CHDH	Q8NE62	3_53877233_G_C	rs6445608	7.2735685288722935e-06	4.6140648787404405e-07	3.0	1.9805750438805592e-08	0.35069710610659843	1.2407181354139054e-07	0.38035207691676703	0.03417249916959288	0.38074712037486425	0.4525916460071231	0.07321096571715248	True	53877233,53872017,53872039,53873814,53876218,53877149,53877211,53878452,53881471,53881830,53883722,53883910,53884218		3_53877211_CCA_C;			3_53878452_C_T;3_53877211_CCA_C;3_53877149_G_T;3_53876218_A_G;3_53873814_A_G;3_53872039_G_A;3_53872017_C_G;3_53877233_G_C;			0.3465346534653465	3	-1	53846362	53880417
ENSG00000018625	ENSG00000018625	ENST00000463989_ATP1A2	B1AKY9	1_160091136_T_C	rs17846705	0.00241420655079098	8.95175976401854e-05	8.0	1.1071816227697948e-08	-0.6134029667993758	0.2572038133381393	-0.10044703027096834	0.7929364000134923	-0.715430805945126	0.6564960185714506	0.060127460055617865	False	160091136,160077169,160078111,160078891,160079304,160080705,160081222,160083544,160084399,160096358,160102702,160105367,160107222,160107309,160107499,160108586,160108803,160108856,160109408,160109636,160109656,160109788,160109835,160110198					1_160110198_T_G;1_160109835_G_A;1_160109788_C_T;1_160109656_G_C;1_160109636_C_G;1_160108856_T_C;1_160108803_C_T;1_160108586_G_A;1_160107499_T_G;1_160107309_A_G;1_160107222_G_A;1_160102702_G_A;1_160096358_C_T;1_160091136_T_C;		1_160105367_C_T;	0.09405940594059406	1	1	160085549	160113381
ENSG00000018699	ENSG00000018699	ENST00000317907_TTC27	Q6P3X3	2_32903548_G_A	rs111896629	1.9054738285151736e-10	3.2497495311068007e-12	6.0	1.8921373181093126e-17	-0.7522391548407669	3.001611278748489e-23	-1.0392949107409526	2.2296377483849803e-05	-0.7489840113032846	2.1380256268588664e-08	-0.6729864246657709	False	32903548,32891365					2_32891365_T_G;2_32903548_G_A;	2_32891365_T_G;2_32903548_G_A;		0.1113861386138614	2	1	32853099	33046118
ENSG00000020922	ENSG00000020922	ENST00000323929_MRE11A	F8W7U8	11_94226952_C_T	rs1805363	2.2370953054373003e-09	2.6786203492533194e-11	10.0	8.097849513692249e-17	-0.8989562004159206	0.0013960608731156642	-0.42533170547461785	0.2364695916302161	-1.0208915069445874	0.328662434444635	-0.15048567712920755	False	94226952			11_94226952_C_T;	11_94226952_C_T;	11_94226952_C_T;			0.08415841584158416	11	-1	94152895	94227074
ENSG00000021355	ENSG00000021355	ENST00000537185_SERPINB1	P30740	6_2834265_C_T		1.2058483542396063e-08	2.649878469972945e-10	6.0	3.128169302757216e-19	-0.9859625844952442	3.136160183376713e-10	-0.5800665197085166	5.052396930703617e-06	-0.4892990098374179	7.612815727608559e-08	-0.5015422972509249	False	2834265,2833739,2834416,2837612,2838046,2838248,2839789,2841040		6_2838247_GG_G;		6_2833739_A_G;	6_2841040_T_C;6_2839789_T_C;6_2838248_G_A;6_2838247_GG_G;6_2838046_A_G;6_2837612_G_A;6_2834416_G_A;6_2834265_C_T;			0.2920792079207921	6	-1	2832566	2842240
ENSG00000021574	ENSG00000021574	ENST00000315285_SPAST	Q9UBP0-3	2_32347785_G_A	rs12611678	7.776572426128132e-05	8.744299270028809e-06	2.0	1.7522109687757207e-08	0.2243213022624388	2.3318152294334504e-06	0.2583281030588013	0.04371820867335355	0.29225662805211017	0.048180020518506526	0.1552299771994452	True	32347785,32348330,32349072,32349813,32350336,32350427,32351009,32353316,32354005,32354558,32355412,32357598,32360887,32361482,32362079,32363171,32364093,32364131,32364241,32365161,32367986,32370258,32370344,32370724,32371562,32372096,32373298,32373514,32374000,32376201,32376303,32381829		2_32362079_G_GTATA;2_32361482_T_TC;2_32357598_CT_C;2_32357598_CTT_C;2_32355412_ATACT_A;		2_32381829_G_A;	2_32376303_T_C;2_32376201_G_A;2_32374000_C_A;2_32373514_G_T;2_32373298_C_T;2_32372096_A_T;2_32371562_G_C;2_32370344_C_T;2_32370258_C_A;2_32367986_G_T;2_32365161_G_A;2_32364241_T_A;2_32364131_G_A;2_32364093_C_T;2_32363171_A_G;2_32362079_G_GTATA;2_32361482_T_TC;2_32360887_G_T;2_32357598_CT_C;2_32357598_CTT_C;2_32355412_ATACT_A;2_32354558_C_T;2_32354005_G_A;2_32353316_G_A;2_32351009_A_G;2_32350427_A…			0.38613861386138615	2	1	32288680	32382706
ENSG00000021776	ENSG00000021776	ENST00000559767_AQR	O60306	15_35336403_C_T	rs62005096	0.0406756114244947	0.002706285289240473	6.0	9.54664728562736e-05	-0.3078499144965909	0.14449045822471154	0.11910148135765584	0.3546555256118509	-0.3972641923793692	0.9352602350049792	-0.00940982267264534	True	35336403								0.17326732673267325	15	-1	35147732	35262040
ENSG00000021826	ENSG00000021826	ENST00000518043_CPS1	P31327-3	2_211348599_G_T	rs60112891	1.8146612104562146e-06	2.896953858141537e-08	11.0	1.0803053066190245e-11	0.4832153041596368	2.6882990719124733e-12	0.4790258860146233	0.00017278039999425306	0.5571865053890948	1.043913999415665e-07	0.4864709760601092	False	211348599,211349261,211349749,211355372,211357642,211367102,211370496,211376259,211376971,211380780,211381486,211386484,211418908,211429515		2_211376259_TAAAC_T;2_211367102_TA_T;2_211367100_TATA_T;2_211367098_TATATA_T;			2_211429515_G_A;2_211418908_C_T;2_211386484_G_A;2_211381486_T_C;2_211380780_C_T;2_211376971_T_G;2_211376259_TAAAC_T;2_211370496_C_T;2_211367102_TA_T;2_211367100_TATA_T;2_211367098_TATATA_T;2_211357642_C_T;2_211355372_G_A;2_211349749_G_A;2_211349261_A_G;2_211348599_G_T;			0.4900990099009901	2	1	211342406	211543831
ENSG00000022976	ENSG00000022976	ENST00000442396_ZNF839	A8K0R7-5	14_102776949_G_A		0.042353869823999864	0.0013055718517848065	13.0	5.940313734156953e-07	-0.5739023745556121	2.902660919074129e-07	-0.5707929520165947	0.4702793786361168	0.2025569171627144	0.8915111941970115	-0.030648910840330945	False	102776949								0.14108910891089108	14	1	102783714	102809044
ENSG00000023041	ENSG00000023041	ENST00000471035_ZDHHC6	Q9H6R6-2	10_114111348_G_C		0.002294863226026495	0.00016956154768710214	4.0	0.00011149183318547881	0.3814033917037327	0.981284544846869	0.0014070450863126918	0.3963894145633368	-0.33709991639336057	0.9164689832158908	-0.01600045234395342	False	114111348,114108750,114136349								0.3688118811881188	10	-1	114190058	114206672
ENSG00000023191	ENSG00000023191	ENST00000397615_RNH1	P13489	11_450763_T_G	rs55768561	2.1542310165613386e-23	2.0375920675347884e-26	24.0	5.5992008877014574e-33	-1.4092346378101717	0.0013608938392109349	-0.3140499792235903	2.6957472331140147	-0.1793841624927648	0.5158815590476662	-0.06387153440911764	True	450763,433554,433867,433965,435463,435941,444628,448175,450987,454743,454746,455008,455321,458265,458427,463288,463290,463291,466140,466857,467720,471670,474033,474912,478401,479729,480870,482166,482246,482568,484527,486874,487257,487935,488135,488140,488389,488877,489386,489829,491987,492034,493460,496073,496116,498383,499059,500056,504507,504636,505006,505113,507670,509333,510980,511516,511805,…	11_499059_C_T;			11_504507_C_A;11_499059_C_T;	11_505113_T_C;11_505006_G_C;11_504636_G_A;11_504507_C_A;11_500056_G_A;11_499059_C_T;11_498383_C_T;11_496116_G_A;11_496073_C_G;	11_505113_T_C;11_505006_G_C;11_504636_G_A;11_504507_C_A;11_500056_G_A;11_499059_C_T;11_498383_C_T;11_496116_G_A;11_496073_C_G;	11_499059_C_T;	0.15346534653465346	11	-1	494512	507300
ENSG00000023228	ENSG00000023228	ENST00000233190_NDUFS1	P28331-2	2_207000898_T_C	rs12620907	3.808347964087372e-14	2.6607371097011277e-16	10.0	8.98376894710336e-22	-0.4096675131048714	1.2086458666909335e-20	-0.591071974284004	0.4596614373269599	-0.21274673495866514	0.27424698117001	-0.09368071793057453	True	207000898,206951515,206952565,206953057,206954601,206955002,206955081,206958287,206958722,206958754,206958920,206958964,206959328,206959970,206963624,206964087,206965271,206965373,206965837,206972370,206972919,206973305,206973801,206974642,206974952,206976068,206976204,206976230,206977944,206978427,206978613,206981154,206981536,206981571,206982093,206982546,206983315,206985727,206985925,206986020…		2_207008675_C_CT;2_207003438_TA_T;2_206997418_TGTAACTAATATA_T;2_206993428_CCGTGAGGCTGGGGCTG_C;2_206989003_GAAAGATATTAAGAAAATGTCATTTTGATAATACAACTTTTTAAAAAGCACATACTAAAACTTTAATGGTGCACATATTCAGGAGGAAAAAAGATTATAAGGCCCTATGCAAGTATATATAATTATATGTAACCAACAGATTCCAACGATAAACCCCTTACTGGCCACATGCTTTCAATAACTATCCCTGGAAACAATCAAATAACTATAGAGCAGCTAGACAGTGCACCAGTATGCAGCCATTAAAAAATTATAGAAAAGTATTAAAAACATAGGAAAGGCCAGGCGCGGTG…	2_206989003_GAAAGATATTAAGAAAATGTCATTTTGATAATACAACTTTTTAAAAAGCACATACTAAAACTTTAATGGTGCACATATTCAGGAGGAAAAAAGATTATAAGGCCCTATGCAAGTATATATAATTATATGTAACCAACAGATTCCAACGATAAACCCCTTACTGGCCACATGCTTTCAATAACTATCCCTGGAAACAATCAAATAACTATAGAGCAGCTAGACAGTGCACCAGTATGCAGCCATTAAAAAATTATAGAAAAGTATTAAAAACATAGGAAAGGCCAGGCGCGGTGGCTCACACCTGTAATCCCAGCACTTTGGGAGGCCGAGGCAGGTGGATCACGAGGTCAGGAGATTGAGACCATCCTGGCTAACACAGTGAAACCC…	2_207024107_G_C;2_206987015_A_G;2_206986628_T_C;2_206986020_G_A;2_206985925_G_T;2_206985727_C_T;2_206983315_T_C;2_206982546_C_T;2_206982093_C_T;2_206981571_C_A;2_206981536_G_A;2_206981154_GC_G;	2_207023620_A_G;2_207023595_C_A;2_207023508_T_C;2_207023143_G_C;2_207022922_G_A;2_207022836_G_A;2_207021545_G_T;2_207021097_G_T;2_207020936_A_G;2_207020354_G_C;2_207018847_T_C;2_207016651_A_G;2_207015772_A_C;2_207013099_A_C;2_207010558_G_T;2_207008675_C_CT;2_207008675_C_T;2_207007127_C_T;2_207006825_C_A;2_207006466_G_A;2_207005935_C_T;2_207005782_C_G;2_207005644_G_A;2_207004158_G_A;2_207003438_TA…	2_207024107_G_C;2_207023620_A_G;2_207023595_C_A;2_207023508_T_C;2_207023143_G_C;2_207022922_G_A;2_207022836_G_A;2_207021545_G_T;2_207021097_G_T;2_207020936_A_G;2_207020354_G_C;2_207018847_T_C;2_207016651_A_G;2_207015772_A_C;2_207013099_A_C;	2_207008763_C_A;	0.4801980198019802	2	-1	206979541	207024327
ENSG00000023330	ENSG00000023330	ENST00000310271_ALAS1	P13196	3_52060065_C_T	rs62261062	0.03294028380098706	0.0021451349248584454	6.0	7.2997074025679035e-06	-0.6150592535310738	0.01274843971397445	-0.2515465445214196	1.7218398078990202	-0.3667816781040911	0.4062820784102359	0.14349219263317936	False	52060065,51963904,52012613,52052120								0.0594059405940594	3	1	52232102	52248343
ENSG00000023572	ENSG00000023572	ENST00000367439_GLRX2	Q9NS18	1_193131368_A_G		0.09249403501319382	0.013712944190701286	3.0	0.00045875675558377317	0.19677832587966235	4.654057500878857e-05	0.2028185505111396	0.8470579891290104	-0.037981470767590286	0.4195470836302619	-0.11115362944349272	False	193131368								0.4158415841584158	1	-1	193065598	193075244
ENSG00000023902	ENSG00000023902	ENST00000369124_PLEKHO1	Q53GL0	1_150029936_G_A	rs55647342	1.3200397375087432e-11	1.181545801275175e-13	10.0	3.6166076684118014e-18	1.0954360778153052	0.6267260352993138	0.04574022773426411	1.144200323494713	0.19497565622598886	0.503874486718097	-0.09550712910446137	False	150029936,149999764,150000964,150001233,150001470,150001632,150001899,150002293,150002436,150003117,150003513,150004133,150004348,150005225,150007105,150008584,150008790,150009216,150009705,150009841,150010556,150011145,150011323,150011362,150012168,150012882,150012917,150013019,150013129,150013403,150013453,150013470,150013656,150013919,150014017,150014078,150015166,150015253,150015482,150015625…		1_150130982_G_GC;		1_150122369_A_G;	1_150130982_G_GC;1_150130982_GG_GCT;1_150130081_C_T;1_150129998_T_C;1_150129335_G_A;1_150128425_C_T;1_150124615_T_C;1_150123762_G_T;1_150122369_A_G;			0.1608910891089109	1	1	150121373	150136916
ENSG00000023909	ENSG00000023909	ENST00000370238_GCLM	P48507	1_94405726_G_A	rs11165037	1.6163128790094348e-07	8.047978343691609e-09	3.0	1.4186503075025024e-11	-0.7951661568963634	5.226545542628981e-13	-0.7571299175834432	0.4635510549171807	-0.15431346630817355	0.18431133295372198	-0.13348666739555434	False	94405726								0.099009900990099	1	-1	94350761	94374966
ENSG00000024526	ENSG00000024526	ENST00000525124_DEPDC1	Q5TB30	1_69146910_C_T	rs9436845	0.009897734914195674	0.0006700936505070607	5.0	6.229685772025556e-06	-0.7033597968469468	0.007942585475043255	-0.2394670992052988	0.8701161501172104	-0.2591706019937399	0.6093215814879214	0.09207532408857233	False	69146910,69166990,69167110								0.08168316831683169	1	-1	68939835	68962904
ENSG00000025772	ENSG00000025772	ENST00000372813_TOMM34	Q15785	20_43589041_G_A	rs2234197	0.023591533074730518	0.00883503191130816	1.0	3.487540205488097e-05	-0.3855675128330926	0.00031388050884254064	-0.2758042845870276	0.008753735863007194	-0.3609220925818144	0.06209891813955332	-0.16806621082359066	False	43589041				20_43589041_G_A;				0.2277227722772277	20	-1	43570771	43589127
ENSG00000026297	ENSG00000026297	ENST00000421787_RNASET2	A0A087WZM2	6_167520375_G_A		0.012198737324005395	0.00035356059620367714	12.0	1.9609936277582614e-08	-0.7623908600314899	0.10081693749792	-0.1767609029444862	0.03144372628403517	-0.4918132928957988	0.3024983374135437	0.1425670686584093	False	167520375,167533083,167535836,167535914,167537929,167540663,167541185,167542357								0.054455445544554455	6	-1	167342992	167370679
ENSG00000026652	ENSG00000026652	ENST00000457520_AGPAT4	Q9NRZ5	6_161447394_T_C		0.034075930248041036	0.0016708307953601635	8.0	1.565420820253746e-06	-0.3613396264717763	0.16925281777513587	-0.10440191397322404	0.017679400916475817	-0.4254719038578405	0.05130869555094839	-0.2068038114411261	False	161447394								0.2425742574257425	6	-1	161551011	161695093
ENSG00000027847	ENSG00000027847	ENST00000507061_B4GALT7	Q9UBV7	5_177151456_C_T	rs2270803	0.0010401661945388324	3.5678483472404966e-05	8.0	8.302855589373507e-08	-0.5398128727550224	0.11268896399970495	-0.08094002901897553	0.05867947797227885	-0.4523199231220372	0.5523047223435769	-0.07601949610507007	False	177151456								0.3811881188118812	5	1	177027101	177037348
ENSG00000028203	ENSG00000028203	ENST00000549002_VEZT	F8W8C2	12_95633557_A_G	rs12369055	0.0033702659723367804	2.513810675271709e-05	41.0	2.0439842539264675e-09	0.5586208086342885	0.3928862949731456	0.09056613865825236	0.140390831094912	1.0050247227037348	0.16824544995049448	0.06379224229999902	False	95633557,95569637,95574831,95592272,95601584,95606823,95609305,95611141,95611960,95615631,95616085,95616122,95620705,95623284,95624576,95625480,95637234,95641522,95651093,95656580,95656936,95665912,95666323,95671324,95671904,95686394,95687428,95691539,95695641,95707761,95709315		12_95671323_CG_C;12_95656580_GAAAAT_G;12_95620705_C_CA;12_95615631_CA_C;		12_95695641_T_C;	12_95691539_A_C;12_95687428_A_G;12_95686394_G_A;12_95671904_A_G;12_95671324_G_A;12_95671323_CG_C;12_95666323_A_C;12_95665912_T_C;12_95656936_A_G;12_95656580_GAAAAT_G;12_95651093_T_G;12_95641522_C_T;12_95637234_C_T;12_95625480_C_T;12_95624576_G_A;12_95623284_A_G;12_95620705_C_CA;12_95616122_T_C;12_95616085_G_T;12_95615631_CA_C;12_95633557_A_G;	12_95691539_A_C;12_95687428_A_G;12_95686394_G_A;12_95671904_A_G;12_95671324_G_A;12_95671323_CG_C;12_95666323_A_C;12_95665912_T_C;12_95656936_A_G;12_95656580_GAAAAT_G;12_95651093_T_G;12_95641522_C_T;12_95637234_C_T;12_95625480_C_T;12_95624576_G_A;12_95623284_A_G;12_95620705_C_CA;12_95616122_T_C;12_95616085_G_T;12_95615631_CA_C;12_95633557_A_G;		0.2400990099009901	12	1	95611522	95696566
ENSG00000028310	ENSG00000028310	ENST00000323510_BRD9	Q9H8M2	5_869546_C_T	rs7733636	0.000927818623001842	1.1483394881681661e-05	22.0	1.1981415176459416e-08	0.940790912852415	3.720510084166501e-05	0.6659788018561011	0.32515778281667346	0.7772821331695177	0.19715908345348526	0.2025814491298168	False	869546,806225,812316,814632,814653,822172,824096,833285,834338,834502,834966,836029,837923,837987,840575,840973,841614,843152,848962,849248,849504,849605,849627,849709,850066,850280,851114,852180,853723,854138,854550,855235,855420,856045,857245,857853,858251,858497,858559,861130,861283,861467,861905,862182,862220,862414,862682,862841,862957,863097,863797,864466,865970,866718,866971,870555,870619,…		5_890353_CAGG_C;		5_892846_C_T;5_864466_G_A;	5_890888_T_C;5_890634_T_G;5_890356_G_A;5_890353_CAGG_C;5_890124_T_C;5_890030_G_C;5_889497_C_A;5_889396_G_A;5_889369_C_T;5_889091_C_T;5_886391_G_A;5_886226_G_A;5_885632_G_A;5_884684_T_C;5_884439_A_C;5_884359_G_A;5_883300_T_G;5_880975_A_G;5_878183_T_C;5_877492_G_A;5_876462_T_G;5_875589_A_T;5_873784_C_G;5_873451_T_C;5_873352_C_T;5_872765_T_G;5_872630_G_C;5_872168_G_A;5_871905_G_A;5_871598_T_C;5_8713…	5_878183_T_C;5_877492_G_A;5_876462_T_G;5_875589_A_T;5_873784_C_G;5_873451_T_C;5_873352_C_T;5_872765_T_G;5_872630_G_C;5_872168_G_A;5_871905_G_A;5_871598_T_C;5_871348_T_C;5_870619_A_G;5_870555_A_G;5_866971_A_T;5_866718_G_A;5_865970_G_A;5_869546_C_T;	5_870619_A_G;	0.061881188118811874	5	-1	850406	892939
ENSG00000028528	ENSG00000028528	ENST00000559844_SNX1	Q13596	15_64508763_G_A	rs6494466	8.413768241998151e-05	1.3607305731295526e-06	14.0	1.0929114651109213e-10	0.4070697557075891	4.235951453892152e-14	0.6083346326620507	0.002771593946495933	0.3841591717023274	1.412686084578322e-08	0.3976515965319898	True	64508763,64351745,64352932,64353201,64357712,64358722,64360155,64361441,64364370,64365340,64366293,64369998,64370822,64371615,64373822,64374034,64375216,64379705,64379865,64381148,64382738,64383215,64383362,64383458,64384172,64389087,64389434,64391096,64391667,64394580,64398539,64399944,64411521,64416621,64418221,64427426,64427587,64430607,64434537,64436455,64439532,64440424,64441036,64524980		15_64434536_AG_A;15_64394580_TC_T;		15_64434537_G_A;15_64434536_AG_A;15_64430607_T_C;	15_64436455_C_A;15_64434537_G_A;15_64434536_AG_A;15_64430607_T_C;15_64427587_C_G;15_64427426_C_T;15_64418221_C_G;15_64416621_G_A;15_64411521_A_G;15_64399944_G_A;15_64398539_A_C;15_64394580_TC_T;15_64391667_A_G;15_64391096_T_C;15_64389434_G_A;15_64389087_T_G;	15_64434537_G_A;15_64434536_AG_A;15_64430607_T_C;15_64427587_C_G;15_64427426_C_T;15_64418221_C_G;15_64416621_G_A;15_64411521_A_G;15_64399944_G_A;15_64398539_A_C;15_64394580_TC_T;15_64391667_A_G;15_64391096_T_C;15_64389434_G_A;15_64389087_T_G;		0.27722772277227725	15	1	64386322	64438289
ENSG00000029534	ENSG00000029534	ENST00000347528_ANK1	P16157-3	8_41609623_C_T	rs60792897	1.7753547583205102e-05	1.8925335796084628e-07	19.0	6.9353854842757045e-16	-0.6721203298376954	9.125515919474179e-20	-0.7925159133237165	7.701877528824648e-11	-0.9335127748607536	2.771155221461583e-06	-0.4650159122108004	False	41609623,41609843,41610643,41612255,41613496,41614567					8_41614567_G_A;8_41613496_T_C;8_41612255_C_T;8_41610643_C_T;8_41609843_G_A;8_41609623_C_T;			0.3886138613861386	8	-1	41510739	41754280
ENSG00000029639	ENSG00000029639	ENST00000367166_TFB1M	Q8WVM0	6_155635637_A_C		9.261391635289144e-39	2.057602888208205e-42	9.0	6.761608795167176e-35	-1.0543064171996015	7.765350522420882e-36	-0.9662650432735408	2.0591959389189587e-11	-0.806820877064355	7.608338915696376e-13	-0.7057091610791852	False	155635637,155625104,155635281,155635585,155635624,155635808,155635812,155635813		6_155635281_G_GTC;		6_155635585_A_C;	6_155635281_G_GTC;6_155625104_A_G;			0.3935643564356436	6	-1	155578643	155635627
ENSG00000029725	ENSG00000029725	ENST00000546142_RABEP1	Q15276	17_5275918_G_A	rs3026096	1.3779197035952779e-13	1.0080758123221158e-15	10.0	6.269066864352751e-26	-0.6635687128363092	0.04965959321316505	0.12030491939834115	0.1825135011466428	-0.4016737478258569	0.6483190924509106	-0.04026896131434832	True	5275918,5185041,5185664,5187873,5189163,5190108,5190245,5190364,5190462,5191225,5191527,5192956,5193871,5194444,5194578,5195181,5198041,5198091,5198295,5199100,5199306,5199397,5202009,5202073,5202839,5203268,5213595,5218740,5237012,5237807,5242780,5242969,5248301,5249226,5259656,5261566,5262529,5262749,5268337,5270414,5277598,5281989,5287079,5308603,5313807,5326162		17_5277417_AATGGCATCATCTCTGCTCACTGCAACCTCCGCCTCACAGGTTTAAACGATTCTCCTGCCTCAGCCTCCCCAGTAGCTGGGATTACAAGCGCCTGCCACCATGCCCAGCTAATTTTTTGCATTTATAGTATAGATGGGGTTTCACCATGTTTGCCAGGCTGGTCTTGAGCTCCTGACCTCACGTGAGCCACCATGCCCAGCCAAAGATGGCACTTTTGGTCACTTACATTCTTCTGTGGTTGGGTAAACCTGGGCTACAAAACTGGTTTCCCAGAGACATTCATAATTCTCTCCTTAACTTTATCCAAGCTTAATTTTTAATTTTTATTTTTTGAGACACAGTTTCATTCTGTCCCCTAGGCTGGAGTGCAGTGGTGTGATCTTGGCT…	17_5235445_AAGGTAAAGACAGAGAAAGATCAATTTTGTGATTTTCTAAGATATCCGATTCTGATGATTGAGAATATTTTCAGAGAATCTTAAAATATATACAGAGTTTCATTTGTGGTTTTATGTACTGTCATCATCAAGATATACTTTCAGATAAAAGAGAAGTCACTAATAACATAAATGGATATATCAATCGTATCTAACTTAATAATGGAGAGTTATAATAGGGATGTTATAGAGATAATGCATTAAATGAGGACTATAGTTCATTGTAAGGCTTAAAAGTCGATTTCTTCTAGGAGGCAGGCTAGTAATCTCAAATAATTAAGCTGTATGGGCACAGGGAATGTGCTGGAGTAGAGAGAGCTGCCATGCAAAGGGTAAAGTAACTGTTTAC…	17_5185664_T_C;	17_5281989_T_C;17_5277598_C_A;17_5277417_AATGGCATCATCTCTGCTCACTGCAACCTCCGCCTCACAGGTTTAAACGATTCTCCTGCCTCAGCCTCCCCAGTAGCTGGGATTACAAGCGCCTGCCACCATGCCCAGCTAATTTTTTGCATTTATAGTATAGATGGGGTTTCACCATGTTTGCCAGGCTGGTCTTGAGCTCCTGACCTCACGTGAGCCACCATGCCCAGCCAAAGATGGCACTTTTGGTCACTTACATTCTTCTGTGGTTGGGTAAACCTGGGCTACAAAACTGGTTTCCCAGAGACATTCATAATTCTCTCCTTAACTTTATCCAAGCTTAATTTTTAATTTTTATTTTTTGAGACACAGTTTCATTCTGTCCCCT…			0.4826732673267327	17	1	5185558	5289129
ENSG00000030066	ENSG00000030066	ENST00000378460_NUP160	Q12769	11_47687147_A_G	rs12787112	0.010354247458863684	0.00029391026269181	12.0	3.969332127682897e-06	0.19300350559402124	1.9112729615508946e-07	0.2707750593627231	0.25073771125509314	0.6722934558946232	0.4240001307385669	0.06930325857683918	True	47687147,47475189,47486885,47488114,47495746,47522874,47523214,47527052,47539697,47541490,47547046,47568074,47571372,47583121,47586376,47589707,47602729,47606483,47615798,47622139,47623890,47640429,47643891,47648042,47650138,47655752,47658314,47663049,47669665,47674084,47699883,47716324,47716381,47716975,47723512,47725306,47726977,47728617,47737501,47743696,47749960,47752775,47756475,47758449,477…				11_47799775_C_G;	11_47868853_C_G;11_47863119_G_A;11_47857520_C_T;11_47851376_C_T;11_47847428_G_A;11_47846711_G_A;11_47841581_G_A;11_47840864_C_A;11_47836062_T_C;11_47832793_G_A;11_47817441_C_T;11_47812311_C_T;11_47807774_T_C;11_47805614_C_A;11_47805478_T_C;			0.3688118811881188	11	-1	47799639	47870107
ENSG00000030110	ENSG00000030110	ENST00000374467_BAK1	Q16611	6_33546837_T_C		2.6797249070898036e-07	1.3731672757650647e-08	3.0	1.1379139445571596e-15	-0.5891112318341488	7.993330105004959e-14	-0.40983414731525203	0.811927118096955	-0.2304010077657783	0.5170283903176693	-0.05606400924491739	True	33546837,33540209,33541507,33546930				6_33541507_A_G;	6_33546930_T_C;6_33546837_T_C;			0.25742574257425743	6	-1	33540329	33548019
ENSG00000031691	ENSG00000031691	ENST00000335783_CENPQ	Q7L2Z9	6_49456545_G_A		1.5547909376963787e-18	6.330407280473314e-20	1.0	1.8000549241641643e-27	0.7916525859996123	3.709095511240467e-28	0.8136657070131866	4.5672781820214496e-06	0.7476866223960057	0.0014892266725826668	0.3010647496588518	True	49456545,49342165,49345141,49347535,49350785,49353014,49361552,49370279,49370724,49370737,49371403,49371854,49372796,49375279,49376281,49376681,49379536,49382193,49383804,49384048,49385182,49386564,49387292,49393500,49398115,49400237,49403282,49406056,49406348,49407053,49407069,49413244,49413289,49413391,49421607,49423547,49425521,49426018,49427409,49433198,49436199,49446509,49446995,49450368,494…	6_49459978_A_G;	6_49450368_CTCGGCGA_C;		6_49460152_A_G;	6_49457835_A_G;6_49454667_C_A;6_49453672_A_T;6_49451240_C_T;6_49451187_G_A;6_49450368_CTCGGCGA_C;6_49446995_A_G;6_49446509_G_A;6_49436199_T_C;6_49433198_T_C;6_49456545_G_A;			0.3836633663366337	6	1	49431091	49460820
ENSG00000032389	ENSG00000032389	ENST00000382125_TSSC1	A8MUM1	2_3268255_G_A	rs2694092	0.00016636324750158278	2.827509911077242e-06	14.0	3.256910562595586e-10	-0.5075480020330376	3.3872319531971312e-12	-0.4371617878439769	0.22123821925692347	-0.26086782731765257	0.0462833370420816	-0.180320161962503	False	3268255,3212247,3230426,3236201,3245158,3247073,3247171,3247274,3248505,3250154,3251940,3255080,3257136,3257281,3257447,3257667,3257726,3257916,3258174,3258627,3258742,3258961,3259205,3260725,3260741,3260822,3262514,3263777,3263980,3265893,3267038,3267052,3267621,3269034,3269482,3269721,3271738,3272756,3272847,3273950,3274066,3274071,3275826,3276255,3277301,3277451,3277639,3277794,3277884,3279283…		2_3277451_TA_T;2_3277301_CA_C;2_3277300_GC_G;2_3267621_T_TCTTA;2_3267050_CTGGTGACTGGT_C;2_3258961_CT_C;2_3247171_CAGGTGGATCA_C;		2_3212247_G_T;	2_3284341_T_C;2_3281624_A_G;2_3281452_G_A;2_3281342_C_G;2_3279283_T_C;2_3277884_A_G;2_3277794_G_A;2_3277639_G_A;2_3277451_TA_T;2_3277301_CA_C;2_3277300_GC_G;2_3276255_T_C;2_3275826_T_G;2_3274071_T_G;2_3274066_A_G;2_3273950_T_C;2_3272847_T_C;2_3272756_A_G;2_3271738_T_C;2_3269721_C_T;2_3269482_T_C;2_3269034_G_A;2_3267621_T_TCTTA;2_3267621_T_A;2_3267052_G_A;2_3267050_CTGGTGACTGGT_C;2_3267038_A_G;2_3…	2_3284341_T_C;2_3281624_A_G;2_3281452_G_A;2_3281342_C_G;2_3279283_T_C;2_3277884_A_G;2_3277794_G_A;2_3277639_G_A;2_3277451_TA_T;2_3277301_CA_C;2_3277300_GC_G;2_3276255_T_C;2_3275826_T_G;2_3274071_T_G;2_3274066_A_G;2_3273950_T_C;2_3272847_T_C;2_3272756_A_G;2_3271738_T_C;2_3269721_C_T;2_3269482_T_C;2_3269034_G_A;2_3267621_T_TCTTA;2_3267621_T_A;2_3267052_G_A;2_3267050_CTGGTGACTGGT_C;2_3267038_A_G;2_3…		0.457920792079208	2	-1	3192696	3381653
ENSG00000032444	ENSG00000032444	ENST00000595264_PNPLA6	Q8IY17-4	19_7609006_T_G	rs36016119	8.803271710323627e-12	3.218478346223156e-14	24.0	2.4488447238047067e-18	1.0450357719951406	0.8668452398155747	0.014231176711843182	0.08192322932431516	0.3167330642418391	0.2843602627083886	-0.11433822043304608	False	7609006,7606908,7608135	19_7606908_G_C;				19_7608135_C_A;19_7606908_G_C;19_7609006_T_G;			0.17326732673267325	19	1	7598890	7626650
ENSG00000032742	ENSG00000032742	ENST00000351808_IFT88	Q13099-2	13_21226845_C_T	rs4769124	0.032185875373467704	0.0013927106479723927	9.0	1.759054027149482e-07	0.3902424598574785	5.632687368685509e-08	0.3808017573300441	0.5844541158768584	0.37776430290210383	0.022115459648205767	0.19864357678567626	True	21226845,21124466,21124554,21132928,21134982,21200349,21253489,21254947,21258328,21258558					13_21258558_T_C;13_21258328_T_C;13_21253489_G_A;13_21200349_A_G;13_21226845_C_T;			0.3712871287128713	13	1	21140585	21265503
ENSG00000033050	ENSG00000033050	ENST00000222388_ABCF2	Q9UG63-2	7_150906887_A_G	rs35302282	0.0917305253680814	0.006782865633349075	6.0	3.3943634999957735e-06	-0.6043652076838794	0.0007004868771046495	-0.2748855895191056	2.225325756664497	-0.26214351105866585	0.044983327745644286	-0.3931810429410222	True	150906887,150909289,150909301,150910294,150910362,150910744,150912750,150912786,150914340,150915545,150916033,150916539,150916932,150917414,150917587,150918349,150918371,150919259,150919324,150921521,150922613,150923240,150931606,150935430		7_150919323_AT_A;		7_150910744_G_C;7_150910362_T_C;7_150910294_T_G;	7_150923240_C_T;7_150922613_G_A;7_150921521_C_G;7_150919324_T_A;7_150919323_AT_A;7_150919259_T_C;7_150918371_C_T;7_150918349_G_A;7_150917587_T_A;7_150917414_G_A;7_150916932_T_C;7_150916539_G_A;7_150916033_T_G;7_150915545_G_A;7_150914340_G_A;		7_150912786_T_C;7_150912750_G_T;	0.07920792079207921	7	-1	150904923	150924316
ENSG00000033100	ENSG00000033100	ENST00000035307_CHPF2	Q9P2E5	7_150931268_C_G	rs2608293	0.0020957974874564558	0.00015289560004644396	4.0	2.2884488014054866e-08	-0.28450606436317444	9.637078859228832e-11	-0.3689499033464389	0.001993734847248792	-0.4568743883316427	0.00045129775842556885	-0.3315197499023421	False	150931268,150910454,150910642,150915471,150915533,150916114,150916228,150920503,150926775,150928545,150929476,150931646,150931659,150931735,150933258,150933283,150934975,150936052,150939193,150941238,150941406,150944654,150952830,150955289					7_150933283_G_A;7_150933258_T_C;7_150931735_G_A;7_150931659_T_C;7_150931646_T_C;7_150931268_C_G;	7_150933283_G_A;7_150933258_T_C;	7_150934975_C_G;7_150931268_C_G;	0.3935643564356436	7	1	150929575	150935908
ENSG00000033178	ENSG00000033178	ENST00000505673_UBA6	A0AVT1	4_68502140_T_C	rs13112299	0.010640207817945392	0.0006062328899975987	6.0	7.030459242762318e-07	0.3549722188995841	0.003121982151692113	-0.14863596406486118	1.1254626383403403	0.2553689689676633	0.4168175090007976	0.051254109108871404	False	68502140,68474847,68475229,68475367,68478308,68478574,68478852,68479388,68480218,68480740,68480922,68481933,68484094,68484199,68484396,68485352,68485823,68487014,68487599,68488305,68490019,68490650,68492060,68492244,68492301,68492529,68493749,68497333,68498338,68498351,68498892,68499728,68499763,68500441,68502755,68502794,68503418,68504440,68507475,68508198,68508231,68511502,68513398,68513616,685…		4_68566878_A_AG;4_68561278_CA_C;4_68560271_A_ACACCCG;4_68556988_TA_T;4_68555487_CA_C;4_68552651_A_AACAGCAAG;4_68541484_GGAAAGGAAAA_G;4_68539539_AT_A;4_68536555_A_AATTCCATG;4_68532923_CAG_C;4_68513398_CTT_C;4_68510496_CCTATGGAGGAGAAAAATGGTATATATCAGATTAAAATAACCTATCTGTGAATCATTTTACTTTGAAATATTTAACAGGTTTATTTTACCACTGTTTCAACGAAAAAAAAAAGTATAAACCAAATAAGGAAAAGCATAATTGTACAATTTCTTTAAACAGAAGACATTTAAAAATTCCAAAT…	4_68562365_A_G;4_68510496_CCTATGGAGGAGAAAAATGGTATATATCAGATTAAAATAACCTATCTGTGAATCATTTTACTTTGAAATATTTAACAGGTTTATTTTACCACTGTTTCAACGAAAAAAAAAAGTATAAACCAAATAAGGAAAAGCATAATTGTACAATTTCTTTAAACAGAAGACATTTAAAAATTCCAAATAAAATTTAAACATTGAACTGCTTATGTAAGATAGAAATAAACACAATATAATGTTAATACAACATTTAAAAAAAAGATTCCTCCCTTTTGGACATTTCTCAAAACTCATTTACTGAATAAAACTATTCTAAGACTTCTACTATTATCTAAAATTGATAATACTAGATTCCATATGCATGTAAAAAGCTCAG…	4_68566878_A_AG;4_68566878_A_G;4_68484396_G_A;4_68484199_A_G;4_68484094_G_A;4_68481933_T_G;4_68480922_G_T;4_68480740_T_C;4_68480218_T_C;4_68479388_G_A;4_68478852_C_A;4_68478574_T_G;	4_68564942_A_G;4_68564618_C_A;4_68564405_C_T;4_68563779_G_A;4_68562766_G_A;4_68561970_G_T;4_68561278_CA_C;4_68560271_A_ACACCCG;4_68559821_C_T;4_68557328_T_C;4_68556988_TA_T;4_68556897_C_T;4_68555487_CA_C;4_68554208_C_G;4_68553622_A_C;4_68552817_G_C;4_68552651_A_AACAGCAAG;4_68552561_T_A;4_68551736_C_T;4_68550915_A_G;4_68549511_A_C;4_68546025_A_G;4_68545975_T_C;4_68543240_C_T;4_68541484_GGAAAGGAAAA…	4_68490650_G_A;4_68490019_C_T;4_68488305_C_G;4_68487599_A_C;4_68487014_G_T;4_68485823_C_T;4_68485352_G_A;	4_68562365_A_G;	0.2599009900990099	4	-1	68478370	68566897
ENSG00000033327	ENSG00000033327	ENST00000361507_GAB2	Q9UQC2-2	11_78116959_G_A	rs7941639	4.9111844392289065e-11	6.816275744871923e-13	7.0	2.9239619120006598e-18	-0.6462538003591531	4.1094259694064863e-20	-0.6794436754694897	0.007358820152148745	-0.571440145473634	0.8655785539606449	-0.020469178295097867	False	78116959,77917305,77919768,77920457,77920563,77922960,77923019,77923220,77923499,77923601,77923665,77924388,77924544,77924607,77924870,77930138,77930345,77930499,77930792,77930935,77931346,77932126,77933817,77936064,77936166,77937255,77937800,77940075,77940163,77940385,77941076,77941771,77943457,77943848,77944480,77944548,77944568,77945284,77945807,77945815,77945903,77948095,77948515,77952771,779…		11_78128397_CA_C;11_78128396_AC_A;11_78128067_CG_C;11_78032917_TA_T;11_78030917_CTT_C;11_78030149_GA_G;11_78030148_TG_T;11_78021392_CAA_C;11_78014269_CT_C;11_78004958_TTTTTTA_T;11_77997678_T_TTAAAA;11_77989624_AT_A;11_77987856_TTTTA_T;11_77985048_GT_G;11_77980084_CT_C;11_77975452_CT_C;11_77975451_TC_T;11_77974409_GTCAC_G;11_77969951_GTGCATG_G;11_77962788_GCTT_G;11_77960894_GT_G;11_77955621_CA_C;1…		11_78128797_C_T;11_77930138_T_C;	11_78128797_C_T;11_78128397_CA_C;11_78128396_AC_A;11_78128335_G_C;11_78128067_CG_C;11_78128047_C_G;11_78127914_A_G;11_78126754_G_C;11_78126162_C_A;11_78126011_G_A;11_78125246_T_C;11_78124797_G_A;11_78124575_C_G;11_78124534_T_C;11_78123831_T_C;11_78123293_C_T;11_78122779_A_G;11_78122208_G_T;11_78121978_T_C;11_78119822_G_A;11_78117875_A_G;11_78117534_T_C;11_78111613_T_C;11_78110385_C_A;11_78109810_…		11_77937800_G_A;11_77936166_A_G;11_77930345_T_C;	0.2202970297029703	11	-1	77926343	78129394
ENSG00000033867	ENSG00000033867	ENST00000419036_SLC4A7	Q9Y6M7-13	3_27529889_G_T	rs9871261	0.016047193107980282	0.0002870609464936247	20.0	1.1511683166961596e-07	-0.2778876762624846	4.846427116960512e-07	-0.2654795406894858	8.51212788439857e-05	-0.4425920037104945	3.0987873422581086e-08	-0.48874072662188	False	27529889,27268024,27270922,27272007,27272078,27273564,27274044,27275457,27277043,27277084,27278214,27279610,27281689,27281769,27281942,27283117,27283584,27284083,27284547,27285232,27285666,27285728,27286238,27287880,27288787,27290540,27290571,27291143,27291803,27292081,27292287,27292288,27294507,27294833,27296796,27296822,27297494,27297619,27297684,27298168,27298684,27299424,27299614,27299643,272…				3_27417179_T_C;3_27416730_T_C;				0.3118811881188119	3	-1	27414214	27525911
ENSG00000034152	ENSG00000034152	ENST00000342679_MAP2K3	P46734	17_21185631_G_A	rs1379595	0.02437868942033416	0.0007056025501298246	13.0	3.170209826269812e-06	0.2929578624601289	1.6087040777894721e-09	0.3787324719714128	1.2083937535757916	0.16725914847248874	0.02451384590440483	0.1998027651330956	False	21185631,21173498,21174551,21183389,21186360,21187683,21192905					17_21192905_C_T;	17_21192905_C_T;		0.35396039603960394	17	1	21187984	21218552
ENSG00000034533	ENSG00000034533	ENST00000514044_ASTE1	D6RG30	3_130776683_G_T	rs13066937	0.007444921460115269	0.0003070307676961792	8.0	9.372771349114617e-08	-0.5779789691055135	3.2970835516128404e-07	-0.4230733262384886	0.008074244200615536	-0.6796452896174578	0.6081750074447732	-0.05725870731850735	False	130776683								0.2425742574257425	3	-1	130732719	130746493
ENSG00000035115	ENSG00000035115	ENST00000356150_SH3YL1	Q96HL8	2_224919_A_G	rs2290911	1.7367262630159925e-17	2.8809490731330603e-20	29.0	2.44228560068926e-29	-0.9961478455147614	6.354044799767327e-24	-0.9112482465398803	1.2823424800502225e-07	-1.0490988098394884	1.0434538861872213e-07	-0.6727672440599364	False	224919,211317,212548,214837,217334,217560,218386,220889,221560,221981,222336,226933,227066,227201,228088,229456,230912,231741,234668,237346,239597,239969,242132,242426,243929,249092,254215,256116,258210,262335,264019,264227,264621,267367,268191,268293,269679,271797,272203,274672,277003,280819,281178,282137,285421,285471,286756		2_237346_GGTGACACTACCA_G;2_234668_A_AAC;	2_224919_A_G;	2_264019_C_A;2_242132_G_A;2_239969_C_T;2_239597_C_G;2_230912_A_C;2_218386_G_A;	2_264621_A_C;2_264227_G_A;2_264019_C_A;2_262335_A_G;2_258210_T_C;2_256116_G_T;2_254215_G_A;2_249092_A_C;2_243929_G_A;2_242426_A_G;2_242132_G_A;2_239969_C_T;2_239597_C_G;2_237346_GGTGACACTACCA_G;2_234668_A_AAC;2_231741_C_T;2_230912_A_C;2_229456_A_G;2_228088_G_A;2_227201_C_T;2_227066_G_A;2_226933_A_G;2_222336_T_C;2_221981_C_T;2_221560_G_A;2_220889_G_A;2_224919_A_G;	2_258210_T_C;2_256116_G_T;2_254215_G_A;2_249092_A_C;2_243929_G_A;2_242426_A_G;2_242132_G_A;2_239969_C_T;2_239597_C_G;2_237346_GGTGACACTACCA_G;2_234668_A_AAC;2_231741_C_T;2_230912_A_C;2_229456_A_G;2_228088_G_A;2_227201_C_T;2_227066_G_A;2_226933_A_G;2_222336_T_C;2_221981_C_T;2_221560_G_A;2_220889_G_A;2_224919_A_G;	2_224919_A_G;	0.3688118811881188	2	-1	217730	266398
ENSG00000035141	ENSG00000035141	ENST00000037869_FAM136A	E7EQY1	2_70445399_A_G	rs2441356	1.5659417452901713e-07	3.892445175699713e-09	6.0	3.439299983817042e-14	-0.5098533885396971	4.1286147358969566e-09	-0.4196670541567709	0.0003946999438333063	-0.31173154524730434	3.463227469780288e-05	-0.3205943518054541	False	70445399,70411345,70413538,70423835,70441775,70449776,70455907,70456586,70457119,70459227,70471899,70473453,70477319,70479260,70481524,70490362,70497824,70498923,70501479,70504926,70506331,70511784,70521278,70524142,70529242,70532499,70533707,70534978,70537658,70539853,70541419,70542023,70542060,70542940,70543386,70545888,70547597,70548241,70549122,70549165,70549961,70550490,70551937,70556337,705…				2_70524142_A_G;				0.3762376237623761	2	-1	70523107	70529222
ENSG00000035499	ENSG00000035499	ENST00000512452_DEPDC1B	Q8WUY9	5_59805730_C_T	rs114487734	1.277933778224721e-13	1.331315224147809e-15	7.0	1.370595396175528e-24	2.0691248535753752	2.412212684877773e-09	-0.6972349347935797	0.00041049900787451857	-0.26363462963832296	5.431963234657531e-07	-0.9975417230500482	False	59805730								0.04702970297029703	5	-1	59892739	59996017
ENSG00000035687	ENSG00000035687	ENST00000366535_ADSS	P30520	1_244516312_G_A	rs7538448	1.8195300399365577e-05	1.231282384117658e-06	3.0	2.1483145668011047e-10	0.3692933339595557	4.5938288314877725e-11	0.4647152512242849	0.02261206859943825	0.44493518762513307	0.021883456492699776	0.1551742058153076	False	244516312,244513913,244515297,244515378,244516954,244517744,244517792,244517802,244517806,244518038,244518056,244518298,244518523,244518706,244518909,244519257,244519305,244519532,244519545,244519549,244519857,244520071,244520130,244520148,244520817,244520934,244521268,244521538,244522070,244523187,244523405,244523504,244523717,244524616,244524774,244524783,244525082,244525094,244525363,244525988…								0.4851485148514851	1	-1	244571796	244615436
ENSG00000036257	ENSG00000036257	ENST00000409096_CUL3	Q13618	2_225354713_G_A	rs13017924	0.03271374589693468	0.0008513833814155588	15.0	9.74345532864358e-06	0.17862235975392432	2.463716362317536e-06	0.2496338897746435	0.9822101318737378	0.20779399668419973	0.7759229393128799	-0.01992876959727764	True	225354713,225335595,225352461,225361150,225368321,225370554,225373666,225384428,225385542,225388104,225394218,225397170,225415134,225422239,225426527,225437518,225437923,225448976,225456444,225457173		2_225422239_AT_A;2_225372005_CATAATAAACAAGTAATGTCACAAAAACATGGCAACTGCAGTTTTGAGTTCATAAATACTTTATCCTACATAACTCTAATGCAGACCTAATGACACTACAAAACGTCTACAAAAAGGGTCACTAATTAAGAGGTAATTGGTAGTCCCTGTAATGAGGAAGAAATTTTAAAGCCAGTTTAAGTCTTATGGGTATTTCCAAAGGTTTAACTGATAATCATGAAAACAAATCAAATGAACTATACTAGGATTTACTTCATTACACCTCAGGTAAAGTTTTTATGAAATGTATAATATAAATACCACTTCTTCAATATTTTCCTGAGAGCAATCCCTAATGTTTCCCAGGTAGCATCCTAAGCCAATATCTGTA…		2_225335595_A_G;	2_225448976_G_T;2_225437923_C_T;2_225437518_A_G;2_225426527_C_T;2_225422239_AT_A;2_225415134_A_G;2_225397170_T_C;2_225394218_T_C;2_225385542_C_T;2_225384428_A_G;2_225373666_A_G;2_225372005_CATAATAAACAAGTAATGTCACAAAAACATGGCAACTGCAGTTTTGAGTTCATAAATACTTTATCCTACATAACTCTAATGCAGACCTAATGACACTACAAAACGTCTACAAAAAGGGTCACTAATTAAGAGGTAATTGGTAGTCCCTGTAATGAGGAAGAAATTTTAAAGCCAGTTTAAGTCTTATGGGTATTTCCAAAGGTTTAACTG…	2_225352461_C_G;2_225354713_G_A;		0.4356435643564357	2	-1	225334867	225450110
ENSG00000037474	ENSG00000037474	ENST00000507888_NSUN2	Q08J23	5_6602544_T_C	rs2303711	9.955601223211393e-30	9.484870607858419e-33	10.0	1.5581997611575168e-38	-0.9734163340001412	6.165903063794616e-08	0.25033381490946216	0.00030421427326884866	-0.17428454822918882	4.6865488603899496e-07	0.39784371043615296	False	6602544,6600492,6600793,6600864,6601055,6604533,6604931,6604970,6605271,6605532,6605970,6606019,6606303,6606323,6607125,6607916,6608150,6608534,6608957,6609139,6610237,6610249,6610263,6610391,6610786,6611757,6611983,6612243,6612464,6613146,6613418,6613827,6614653,6614655,6614764,6614963,6614969,6615060,6615092,6615728,6616532,6617011,6618186,6618323,6618703,6619733,6620459,6621031,6621210,6626561…		5_6615728_GC_G;5_6611753_TCACA_T;5_6607125_GAAC_G;5_6605970_AT_A;5_6604533_AC_A;5_6600492_G_GT;			5_6626673_C_G;5_6626561_T_C;5_6621210_A_G;5_6621031_A_G;5_6620459_A_G;5_6619733_C_T;5_6618703_T_C;5_6618323_G_C;5_6618186_T_C;5_6617011_C_A;5_6616532_T_C;5_6615728_GC_G;5_6615092_A_C;5_6615060_A_C;5_6614969_A_G;5_6614963_G_A;5_6614764_C_T;5_6614655_T_C;5_6614653_G_C;5_6613827_T_C;5_6613418_G_A;5_6613146_A_G;5_6612464_A_G;5_6612243_A_G;5_6611983_C_A;5_6611757_A_T;5_6611753_TCACA_T;5_6610786_G_T;5_…	5_6626673_C_G;5_6626561_T_C;5_6621210_A_G;5_6621031_A_G;5_6620459_A_G;5_6619733_C_T;5_6618703_T_C;5_6618323_G_C;5_6618186_T_C;5_6617011_C_A;5_6616532_T_C;5_6615728_GC_G;5_6615092_A_C;5_6615060_A_C;5_6614969_A_G;5_6614963_G_A;5_6614764_C_T;5_6614655_T_C;5_6614653_G_C;5_6613827_T_C;5_6613418_G_A;5_6613146_A_G;5_6612464_A_G;5_6612243_A_G;5_6611983_C_A;5_6611757_A_T;5_6611753_TCACA_T;5_6610786_G_T;5_…		0.34405940594059403	5	-1	6599352	6633404
ENSG00000037757	ENSG00000037757	ENST00000319545_MRI1	Q9BV20	19_13870153_C_A	rs371671	3.314065639285386e-13	4.190332347955528e-15	6.0	2.763358641186296e-22	-0.8251563030292806	3.9291008851013686e-23	-0.8430105581465216	1.107193696657063e-10	-0.93202071379007	1.987061313509292e-12	-0.6721456418368261	False	13870153,13869251,13870227,13870393,13871411,13871554,13871830,13871858,13872240,13872531,13872597,13874258,13874898,13875186,13875210,13875234,13875258,13875626					19_13875626_T_C;			0.4826732673267327	19	1	13875346	13885096
ENSG00000038002	ENSG00000038002	ENST00000264595_AGA	P20933	4_178363378_G_A	rs11131799	1.0562114040188835e-09	1.998047527793897e-11	6.0	1.1656071725871167e-17	0.9045914397523408	1.744684589074696e-19	0.9783566970802604	0.9947293115414466	-0.037297108035023285	0.5236229716097066	0.09394864743568328	False	178363378,178356461,178360550,178361051,178361987,178362122					4_178362122_C_G;4_178361987_T_C;4_178361051_C_A;4_178360550_C_T;4_178356461_T_C;4_178363378_G_A;			0.349009900990099	4	-1	178351924	178363657
ENSG00000038210	ENSG00000038210	ENST00000510415_PI4K2B	Q8TCG2	4_25161539_G_A	rs60527077	2.1574905297479027e-19	1.998381312839889e-21	4.0	1.7074153878135144e-25	-1.5702852843108783	0.9223758871883516	-0.009486962758337408	1.6012474128783287	-0.2330116046614008	0.020345395327196744	0.2900009233409464	False	25161539,25130283,25138437,25152346,25157955,25159390,25162380,25164735,25167443,25167562,25170961								0.1188118811881188	4	1	25162263	25280714
ENSG00000038219	ENSG00000038219	ENST00000505343_BOD1L1	Q8NFC6	4_13659459_C_T	rs12374327	0.018206554295316885	0.0010974898937132326	6.0	1.1705858074014986e-07	0.9367089322017564	1.6197163090491633e-05	0.2571964885023907	0.4998981409924236	0.677956523002358	0.7036076484834906	-0.057907735488094574	True	13659459,13624553,13643437		4_13624553_AG_A;			4_13624553_AG_A;	4_13624553_AG_A;		0.07425742574257425	4	-1	13570362	13629347
ENSG00000038274	ENSG00000038274	ENST00000518095_MAT2B	Q9NZL9	5_162939534_G_A	rs6874065	0.0768167850641251	0.004152777562349859	8.0	3.5108434623942526e-06	-0.3710609583925463	0.6054687660178658	0.02447231770414314	0.046127907537211285	-0.33714712700855154	0.305739203269164	-0.23394634019770466	False	162939534,162938940,162940047,162944408,162948392,162949089,162949420,162951982		5_162938940_GT_G;		5_162944408_A_G;	5_162944408_A_G;5_162940047_G_A;5_162938940_GT_G;5_162939534_G_A;	5_162940047_G_A;5_162938940_GT_G;5_162939534_G_A;		0.452970297029703	5	1	162930120	162946342
ENSG00000039319	ENSG00000039319	ENST00000338008_ZFYVE16	Q7Z3T8	5_79597714_G_C	rs28520641	0.06326812341645058	0.0020469908398539163	13.0	4.631694659922382e-06	0.2608867428729465	0.06125869045392145	0.10176409150331013	0.7149790591406571	0.4126595582100903	0.6176187666424169	0.05270873532956266	False	79597714								0.2400990099009901	5	1	79703832	79775169
ENSG00000039650	ENSG00000039650	ENST00000322344_PNKP	Q96T60	19_50380858_T_G	rs731826	9.648859582132243e-05	1.469308030149832e-06	15.0	1.6313015017605672e-08	0.4162085150041281	3.2745767670004656e-07	0.3551107510224919	0.0009534250122089748	0.3901971346743927	0.002470279087163808	0.2332867460307204	True	50380858,50368361,50370066,50370106,50370846,50371399,50371647,50375035,50375242,50375447,50377757,50377835,50378143,50379053,50379193,50382865,50383636,50384882,50385031,50386340,50390412,50391301		19_50370846_CGTGG_C;		19_50370846_CGTGG_C;	19_50370846_CGTGG_C;19_50370106_T_G;19_50370066_C_T;19_50368361_T_A;	19_50370106_T_G;19_50370066_C_T;19_50368361_T_A;		0.4331683168316832	19	-1	50364461	50371166
ENSG00000040275	ENSG00000040275	ENST00000513795_SPDL1	Q96EA4	5_169047788_A_G	rs2338690	1.434642841595655e-13	7.030908617558882e-16	15.0	1.2833630562502024e-19	-0.8775982927438271	0.002251352672562123	-0.16717303785941998	1.0298523024465622e-08	0.04152536231946263	3.0444374309669656e-07	0.42677520869300656	False	169047788								0.31683168316831684	5	1	169010638	169031782
ENSG00000040531	ENSG00000040531	ENST00000399306_CTNS	A8MXW3	17_3540693_G_A	rs459693	0.02279698244978428	0.0007081043419525443	12.0	1.3170343439283892e-06	0.4351742593812137	0.0005227402434936163	0.1575362038980304	0.6219408094581015	0.056397493632976636	0.9364959234118057	0.009009904223763687	False	3540693,3539148,3540917,3542075,3542455,3542479,3542524,3542593,3542768,3543271,3544295,3544729,3544779,3545127,3546639,3546886,3548784,3549268,3549269,3552038,3554059,3556897,3557495,3558695,3558698,3563339		17_3549269_TG_T;17_3546886_TCTCA_T;			17_3563339_C_T;17_3558698_G_A;17_3558695_A_G;17_3557495_A_G;17_3556897_C_T;17_3554059_G_A;17_3552038_G_A;17_3549269_TG_T;17_3549268_C_A;17_3548784_C_T;17_3546886_TCTCA_T;17_3546639_T_C;17_3545127_G_A;17_3544779_G_A;17_3544729_A_G;17_3544295_A_G;17_3543271_A_G;17_3542768_G_C;17_3542593_C_G;17_3542524_C_G;17_3542479_G_A;17_3542455_T_C;17_3542075_G_A;17_3540917_T_C;17_3540693_G_A;			0.4678217821782178	17	1	3539762	3564836
ENSG00000040933	ENSG00000040933	ENST00000074304_INPP4A	Q96PE3-3	2_99153443_A_T	rs3769712	1.7698904401484208e-23	3.614647613057338e-26	11.0	2.46837334202775e-36	1.0088503223142296	0.5948846285949609	-0.03513260691203215	1.0931660183499798	0.22495103429451108	0.7077995199013868	-0.035519090682982764	False	99153443,99023719,99025400,99025863,99028695,99029185,99030598,99031745,99032101,99032298,99032455,99034198,99034554,99034846,99035113,99036530,99036683,99036802,99038352,99040522,99040696,99041269,99042782,99043337,99044762,99045485,99045867,99046253,99046263,99049014,99049528,99049674,99050519,99050646,99050705,99052299,99052685,99056713,99056836,99058885,99059781,99059983,99060873,99061834,990…	2_99172244_A_G;	2_99210261_T_TGGTCTGTATCAGTCCC;2_99199789_CA_C;2_99181315_AT_A;2_99164591_AG_A;2_99140725_TG_T;2_99131387_GA_G;2_99121886_CT_C;2_99118005_C_CA;2_99114147_T_TTCTA;2_99108359_AT_A;2_99103117_C_CAGA;2_99076524_T_TCT;		2_99210261_T_TGGTCTGTATCAGTCCC;2_99209314_G_A;2_99205962_T_C;2_99204428_C_T;	2_99202747_G_A;2_99199789_CA_C;2_99199024_C_G;2_99196483_G_A;2_99195111_A_C;2_99188783_T_C;2_99187650_T_C;2_99187433_A_T;2_99184019_A_G;2_99181315_AT_A;2_99179384_G_A;2_99172244_A_G;2_99164591_AG_A;2_99164541_G_T;2_99164160_A_G;2_99163261_T_A;2_99159966_G_T;2_99159792_G_A;2_99157009_A_C;2_99156807_T_A;2_99154229_C_T;2_99151434_A_G;2_99149946_G_A;2_99149473_C_T;2_99149404_A_G;2_99148970_C_T;2_9914…		2_99193496_C_T;2_99149946_G_A;	0.2698019801980198	2	1	99061317	99210853
ENSG00000041357	ENSG00000041357	ENST00000559082_PSMA4	P25789-2	15_78833450_C_A	rs59133824	2.521000997553096e-09	1.4543530527717228e-11	21.0	1.0404937477494468e-18	0.8907580592880688	0.0003898441802460352	-0.206915282666042	2.47764725661168	0.16751849896448867	0.5541073709771965	0.18706894031254234	True	78833450,78802586,78803057,78807872,78812098,78812329,78814389,78814567,78814681,78815298,78817447,78821016,78822660,78824924,78826948,78829091,78831624,78831668,78831826,78832832,78833036,78833453,78835913,78835914,78837673,78840567,78845110,78849918,78850558,78857896,78858400		15_78835914_T_TG;15_78835913_T_TTG;		15_78832832_T_C;	15_78840567_C_T;15_78837673_C_T;15_78835914_T_TG;15_78835913_T_TTG;15_78833453_T_C;15_78833036_C_A;15_78832832_T_C;15_78833450_C_A;			0.2549504950495049	15	1	78832747	78841604
ENSG00000041802	ENSG00000041802	ENST00000466391_LSG1	Q9H089	3_194369579_C_A	rs3821402	2.3057993413852663e-29	2.932217951479969e-32	8.0	8.307020642302389e-40	1.2533052205854562	1.2101933871999536e-07	0.4620466631038934	0.4159154712639653	0.2804251817919867	0.003204342190098613	-0.3067536888187776	False	194369579,194369580,194377712,194401202,194401975,194402331,194402338,194402391,194402676,194406507					3_194377712_C_T;3_194369580_C_A;3_194369579_CC_AA;3_194369579_C_A;3_194369579_CC_AA;			0.18811881188118806	3	-1	194361517	194393206
ENSG00000042088	ENSG00000042088	ENST00000335725_TDP1	Q9NUW8	14_90408339_T_C	rs4904629	4.129507141317574e-10	2.485216600769417e-12	18.0	1.3049085017561385e-17	-0.6281593377954271	2.3623764477496885e-23	-0.6708254769153642	3.040902961859792e-09	-0.5698590729335609	2.0469956747027825e-14	-0.6681006134707395	True	90408339,90396574,90422664					14_90422664_T_C;	14_90422664_T_C;		0.4554455445544554	14	1	90421283	90511106
ENSG00000042317	ENSG00000042317	ENST00000393545_SPATA7	Q9P0W8-2	14_88971758_T_G	rs2274735	3.610200773887888e-13	1.2487970213989561e-15	22.0	1.5527907313739626e-38	-0.8673623398099292	0.7941021914143553	0.017357226714952264			0.4938997857476726	0.10625677847482208	False	88971758,88826841,88829975,88831418,88832603,88857482,88858230,88859001,88862529,88874915,88878034,88878572,88880128,88881248,88881882,88900090,88900986,88907471,88915632,88919841,88921716,88926823,88927799,88930200,88936702,88938176,88938223,88938652,88939080,88939201,88939434,88941981,88945591,88946622,88948621,88949786,88950679,88950847,88951006,88951062,88951221,88952456,88953504,88955957,889…	14_88862529_G_A;	14_88930200_GT_G;14_88919841_AT_A;	14_88862529_G_A;	14_88862529_G_A;	14_88930200_GT_G;14_88927799_A_G;14_88926823_C_G;14_88921716_G_A;14_88919841_AT_A;14_88915632_G_T;14_88907471_T_A;14_88900986_C_T;14_88900090_C_T;14_88881882_T_A;14_88881248_C_T;14_88880128_G_C;14_88878572_T_C;14_88878034_C_T;14_88874915_T_C;14_88859001_A_G;14_88858230_A_G;14_88857482_A_G;	14_88881882_T_A;14_88881248_C_T;14_88880128_G_C;14_88878572_T_C;14_88878034_C_T;14_88874915_T_C;14_88862529_G_A;14_88859001_A_G;14_88858230_A_G;14_88857482_A_G;		0.3836633663366337	14	1	88851268	88936694
ENSG00000042429	ENSG00000042429	ENST00000533133_MED17	Q9NVC6	11_93564393_C_T	rs601711	3.234288525004394e-05	6.190389918690646e-07	11.0	1.874441953436165e-09	-0.4589119574642784	2.303909372492843e-08	-0.4117078768309961	0.009645357356807192	-0.5334892503212381	0.2314436104672864	-0.09130808203234893	True	93564393,93475628,93476627,93476766,93476860,93477621,93478133,93478342,93478528,93480190,93480708,93481155,93481908,93482094,93482403,93483346,93486384,93486498,93486526,93487418,93487595,93489203,93490219,93490307,93491020,93491179,93491464,93491645,93492058,93492203,93492232,93492355,93493679,93493691,93493825,93493911,93493989,93494005,93494878,93496377,93496563,93498126,93498552,93498833,934…	11_93517886_G_C;	11_93519170_CCA_C;11_93517873_GC_G;			11_93540001_G_A;11_93539050_A_G;11_93538992_T_C;11_93534990_G_A;11_93527684_T_C;11_93519737_G_T;11_93519673_G_A;11_93519170_CCA_C;	11_93540001_G_A;11_93539050_A_G;11_93538992_T_C;11_93534990_G_A;11_93527684_T_C;11_93519737_G_T;11_93519673_G_A;11_93519170_CCA_C;11_93517886_G_C;11_93517874_C_G;11_93517873_GC_G;	11_93517874_C_G;11_93517873_GC_G;	0.4108910891089109	11	1	93517393	93547861
ENSG00000042445	ENSG00000042445	ENST00000295802_RETSAT	Q6NUM9	2_85531807_C_A	rs12714139	0.01116960105818108	0.0003851164890515045	10.0	2.5971294603100435e-07	0.3971887626544909	2.197770792703134e-06	0.36003057983947545	0.11948110523946776	0.4271738472002581	0.3870404686939684	0.07818679702504377	False	85531807,85532205								0.3118811881188119	2	-1	85569211	85581743
ENSG00000042493	ENSG00000042493	ENST00000409724_CAPG	P40121	2_85641187_C_T	rs9677267	9.384570495915686e-06	1.2075652931700495e-07	15.0	5.229678670505972e-12	0.7230167010169015	8.247908606188097e-13	0.6361196842510352	0.0006174209583703499	0.5172813307135735	0.000105564255877273	0.4071288167864351	False	85641187,85632942,85636192,85647589,85650369,85652690,85653209				2_85641187_C_T;	2_85636192_G_A;2_85632942_C_G;2_85641187_C_T;			0.13366336633663367	2	-1	85621871	85645555
ENSG00000042753	ENSG00000042753	ENST00000601498_AP2S1	M0R0N4	19_47358704_G_T	rs381026	6.514148552519871e-12	5.616173710888104e-14	10.0	5.177889129261873e-20	-0.8207058886591835	7.800657666334847e-13	-0.3776989659052298	0.9369842747840184	-0.10784839253767098	0.902007050936832	-0.011339329468418535	False	47358704,47352660,47357875,47358995,47361480,47365184,47371616,47375962,47376101,47376137,47376386,47379025,47385704,47389313,47392744,47395283,47397172,47399389,47400952,47403547,47403854,47408167,47408815,47412224,47419984,47427210,47429798,47437956,47441846,47442908,47445076,47446562,47446691,47447158,47459490,47460366,47462364,47470536,47470862,47473742,47478784,47488891,47494945		19_47352660_AAC_A;			19_47352660_AAC_A;			0.4034653465346535	19	-1	47341393	47354249
ENSG00000043093	ENSG00000043093	ENST00000469954_DCUN1D1	C9JVE2	3_182653263_A_T	rs1553709	0.00042323314335128334	1.5460376611313134e-05	7.0	5.07719536852598e-10	-0.4766977429189627	0.7529553135032905	-0.01564974669191585	0.37568706216429787	-0.3471044961812217	1.1571799751265623	-0.03385040369428172	False	182653263,182651277,182657981,182659953,182663516,182671158,182673196,182673259,182681740,182682264,182688282				3_182681740_C_T;3_182659953_T_C;3_182657981_C_G;	3_182688282_C_T;3_182682264_C_A;3_182673259_C_T;3_182673196_C_T;3_182671158_C_T;3_182663516_G_A;	3_182688282_C_T;3_182682264_C_A;3_182681740_C_T;3_182673259_C_T;3_182673196_C_T;3_182671158_C_T;3_182663516_G_A;	3_182681740_C_T;	0.20544554455445546	3	-1	182655862	182703741
ENSG00000043514	ENSG00000043514	ENST00000316891_TRIT1	Q9H3H1	1_40303627_C_T	rs12123609	2.8541738364769804e-11	1.486432308523585e-13	18.0	1.9296403079269918e-25	-1.4369909625339872	1.7391683818923473e-25	-1.5982841644157997	3.286429075637828e-15	-1.7895481812938066	0.0005320664579008318	-0.5863726953862571	False	40303627,40312053,40313107,40317445,40321194,40329424,40330141,40339467,40345512,40346661		1_40312053_TG_T;			1_40346661_G_A;1_40345512_C_A;1_40339467_G_A;1_40330141_C_T;1_40321194_T_C;1_40317445_C_G;1_40313107_G_A;1_40312053_TG_T;	1_40346661_G_A;1_40345512_C_A;1_40339467_G_A;1_40330141_C_T;1_40321194_T_C;1_40317445_C_G;1_40313107_G_A;1_40312053_TG_T;		0.10396039603960396	1	-1	40306723	40349183
ENSG00000044090	ENSG00000044090	ENST00000265348_CUL7	Q14999	6_42829963_A_G		0.017032990307280785	0.0020401390021462713	3.0	3.130024364511884e-05	0.4455463970434852	7.367144136170455e-07	0.4365542859408566	6.4057015554558504e-06	1.0081207964861831	0.06469184122786079	0.40000052784107615	True	42829963,42830063,42831118,42836583,42840067,42841292,42842341,42845061,42847066,42847266,42848282,42848319,42852887,42855043,42859242,42859334,42867376,42867395,42868375,42869388,42870615,42870855,42871219,42871458,42874156,42875255,42875564,42878192,42878492,42878706,42879103,42880578,42881398,42885038,42888841,42890158,42891161,42891205,42895793,42897956,42899195,42900149,42904091,42904948,429…								0.054455445544554455	6	-1	43005355	43021683
ENSG00000044115	ENSG00000044115	ENST00000523912_CTNNA1	P35221	5_138263249_G_A	rs10463975	2.0056002327824959e-16	2.3965037746567e-19	44.0	5.1266492392423804e-21	1.1226209439408958	9.642641062113832e-14	-0.5645136476326051	0.3074020939392869	0.52585835578236	0.7176475500067245	-0.03513483620052238	True	138263249,138041609,138042464,138043689,138044920,138045240,138045839,138046774,138047311,138049363,138049851,138053059,138053386,138053618,138053623,138054085,138054683,138055901,138056306,138056559,138058482,138059288,138061341,138063019,138063241,138063439,138064219,138064887,138065048,138065316,138065763,138066211,138066947,138069710,138069894,138070195,138070621,138070757,138071872,138072082…		5_138270291_T_TA;5_138258619_TA_T;5_138253220_TTTTA_T;5_138249272_CA_C;5_138248747_CTT_C;5_138248447_TTA_T;5_138248446_ATT_A;5_138231192_TG_T;5_138227085_CT_C;5_138226038_AT_A;5_138205063_CT_C;5_138204862_T_TAA;5_138203436_CT_C;5_138183857_T_TG;5_138181604_TTTTTTTGTTTTTTTG_T;5_138179782_T_TAA;5_138177320_CA_C;5_138165855_CA_C;5_138163715_G_GT;5_138161218_TA_T;5_138154758_A_AC;5_138140427_C_CGT;5_…	5_138221989_G_C;	5_138270542_T_A;5_138270291_T_TA;5_138266546_G_A;5_138059288_G_T;	5_138269148_G_A;5_138267816_A_G;5_138267377_G_A;5_138267083_T_C;5_138264629_G_A;5_138264424_A_G;5_138264058_C_T;5_138262670_A_G;5_138261990_A_G;5_138261671_C_T;5_138261548_T_G;5_138259542_T_A;5_138259443_C_T;5_138258802_A_C;5_138258619_TA_T;5_138258177_G_A;5_138257909_T_C;5_138256278_C_T;5_138256139_C_T;5_138256099_G_C;5_138256018_T_A;5_138255961_G_C;5_138253220_TTTTA_T;5_138251689_G_A;5_13825010…	5_138269148_G_A;5_138267816_A_G;5_138267377_G_A;5_138267083_T_C;5_138266546_G_A;5_138264629_G_A;5_138264424_A_G;5_138264058_C_T;5_138262670_A_G;5_138261990_A_G;5_138261671_C_T;5_138261548_T_G;5_138259542_T_A;5_138259443_C_T;5_138258802_A_C;5_138258619_TA_T;5_138258177_G_A;5_138257909_T_C;5_138256278_C_T;5_138256139_C_T;5_138256099_G_C;5_138256018_T_A;5_138255961_G_C;5_138253220_TTTTA_T;5_13825168…	5_138266546_G_A;	0.25	5	1	137946656	138270723
ENSG00000044459	ENSG00000044459	ENST00000380647_CNTLN	Q9NXG0-2	9_17350983_C_G	rs10124513	2.7753612066402563e-05	9.646191914398914e-07	6.0	2.3141344946578773e-09	-0.37397507188917534	6.921608802261182e-10	-0.3989829607744061	0.06223364940145708	-0.2816743789880361	0.07927689980680877	-0.17718367681321778	False	17350983,17242708,17246782,17246885,17247384,17249540,17249636,17251386,17252006,17252284,17253518,17254620,17254734,17255442,17261209,17261350,17261546,17263439,17265321,17267371,17268228,17268584,17269437,17271858,17272037,17273175,17274319,17278584,17279064,17280827,17282681,17283197,17290979,17291057,17293025,17293779,17294425,17295223,17295260,17295837,17300060,17300064,17300093,17301710,173…		9_17366296_A_ATTG;9_17366293_GTTA_G;9_17362508_AT_A;9_17357596_AC_A;9_17355890_GTC_G;9_17355889_CGT_C;9_17353596_GT_G;9_17344148_GTTTAT_G;9_17334525_CGTGATA_C;9_17333747_CAT_C;9_17325168_ATTCTTT_A;9_17320490_TTTTG_T;9_17300059_AG_A;9_17254734_A_ATTG;9_17246885_GT_G;		9_17301710_C_A;9_17300093_G_A;9_17300064_C_T;9_17300060_G_A;9_17300059_AG_A;	9_17439798_A_G;9_17418425_T_G;9_17414823_C_A;9_17413208_C_T;9_17399095_T_G;9_17398404_G_A;9_17394136_C_T;9_17392921_G_A;9_17391822_G_C;9_17391536_A_G;9_17391173_A_G;9_17390339_C_T;9_17390170_C_T;9_17385348_C_T;9_17384923_A_G;9_17384459_A_G;9_17383073_C_G;9_17380998_T_A;9_17379340_T_C;9_17379146_A_G;9_17376453_T_A;9_17374797_T_G;9_17373948_T_C;9_17373070_G_A;9_17372960_C_T;9_17372261_G_T;9_1737220…			0.3985148514851485	9	1	17134980	17503921
ENSG00000044574	ENSG00000044574	ENST00000324460_HSPA5	P11021	9_128155257_T_A	rs56270088	0.09096362004904952	0.0403034529198741	1.0	0.0002803532224690626	-0.2350157565859836	0.0008415041970842548	-0.20381561674394127	0.01453663741715211	-0.25338478151979626	0.6448712796282094	-0.03876056453232213	True	128155257								0.4034653465346535	9	-1	127997132	128003609
ENSG00000046604	ENSG00000046604	ENST00000261590_DSG2	Q14126	18_29068068_C_T	rs7239805	0.00022081976993330792	2.680381117045093e-05	2.0	1.0029204392602936e-07	-0.2433019039518497	2.2646365345038044e-08	-0.3400718248970053	0.029508732080628017	-0.6377129772173769	0.033354157893462036	-0.15504387097276462	False	29068068,29068368,29068666,29069119,29069799,29070441,29070713,29070824,29071362,29071505,29071787,29076490,29076794,29078627,29082959,29086856,29088709,29092619,29093317,29095434					18_29095434_C_G;18_29093317_A_G;18_29092619_A_G;18_29088709_G_C;18_29086856_G_T;18_29082959_G_A;18_29078627_A_G;			0.4801980198019802	18	1	29078006	29128971
ENSG00000047056	ENSG00000047056	ENST00000381329_WDR37	Q9Y2I8	10_1096538_A_C		0.009837557858298108	0.0006653253079888747	5.0	1.0279397595438052e-07	-0.5044189974936156	0.4219637037168761	-0.06773020902892789	0.04104275218845075	-0.3256539245383765	0.0017443889574469491	-0.3255357398636567	False	1096538,1098002					10_1098002_T_G;10_1096538_A_C;			0.2153465346534653	10	1	1095478	1178237
ENSG00000047188	ENSG00000047188	ENST00000161863_YTHDC2	Q9H6S0	5_112899250_G_A	rs6886199	8.307377564405979e-08	1.711335970353485e-09	7.0	2.2193999532599104e-16	0.6241691494978282	2.1614580337698547e-18	0.8221121624923152	1.1851574110161814e-05	0.641318384140515	6.924855390773577e-12	0.7307330968871479	False	112899250,112852568,112885560,112934886					5_112885560_C_T;5_112852568_G_A;5_112899250_G_A;	5_112885560_C_T;5_112852568_G_A;		0.2673267326732673	5	1	112849380	112930982
ENSG00000047849	ENSG00000047849	ENST00000426837_MAP4	P27816	3_47907719_T_C	rs777014	4.837502656172847e-06	5.0007378669498965e-08	18.0	7.44750377163099e-12	0.5056486862305223	0.004483597670901657	-0.12803469651478513	2.7823507394450717e-07	0.7495902954972321	0.7802375759725315	0.2005358812154628	False	47907719,47749708,47750904,47751057,47752748,47753513,47754135,47757261,47759990,47762030,47762483,47762534,47764213,47765547,47765655,47768075,47768991,47769075,47770380,47771068,47771287,47774078,47774348,47775282,47778009,47781166,47781363,47782319,47784650,47785481,47785795,47786895,47786903,47790063,47790265,47791875,47792785,47795159,47796376,47797556,47799694,47800031,47800507,47801061,478…	3_47958037_G_T;3_47956424_C_G;3_47953733_C_A;3_47953405_A_C;	3_48126302_GT_G;3_48093049_TTGA_T;3_48093051_G_GT;3_48093050_TG_T;3_48093049_TTGA_T;3_48090946_CA_C;3_48085348_TA_T;3_48079518_AT_A;3_48070261_CA_C;3_48064387_GA_G;3_48054456_CTGT_C;3_48044259_T_TACTC;3_48043736_AG_A;3_48029747_ATT_A;3_48027850_TG_T;3_47997826_CAA_C;3_47995224_G_GC;3_47991379_CA_C;3_47981199_GT_G;3_47971964_AC_A;3_47964055_TA_T;3_47947181_AC_A;3_47944636_AG_A;3_47929013_CT_C;3_47…	3_47913592_TGGAAATAGGAAAGTGGGAATGAGGCCTGCAGGTCAGCAATAGCCCCAAGGAGTCACGCTACAAGATGCTTCTTTTTTTGTTTGTTTTGTTTTGTTTTTGGAGACGAAGTCTCACTCTGTTGCCCAGGCTGGAGTGCAGTGGCATGATCTCGGCTCACTGCAGCCTCCGCCTCCCAGGTTCAAGCAATTCTCCTGACTCAGCCTCCAGAGTAGCTGGGACTACAGGCACGTGCCACCACGCCCAGCTAATTTTTTGTATTTTTAGTAGAGACAGGGTTTCACCGTGTTAGCCAGGATGATCTCGATCTCCTGACCTCATGATCCGCCTGCCTCAGCCTCCCAAAGTGCTGGGATTACAGGCATGAGCCACTGCACCTGGACACAAGAT…	3_48016172_T_C;3_47892579_G_C;3_47892376_C_CCTT;	3_48126302_GT_G;3_48123796_C_G;3_48123540_C_T;3_48122410_A_C;3_48121072_G_A;3_48119763_A_G;3_48118703_T_C;3_48117970_T_C;3_48115740_T_C;3_48115088_C_A;3_48113624_A_G;3_48109969_C_T;3_48109566_A_G;3_48104449_C_A;3_48099750_G_A;3_48093133_A_T;3_48093051_GA_AT;3_48093049_TTGA_T;3_48093051_GA_AT;3_48093051_G_GT;3_48093050_TG_T;3_48093049_TTGA_T;3_48092017_C_A;3_48091207_C_T;3_48090946_CA_C;3_48086398…			0.3316831683168317	3	-1	47892182	48130769
ENSG00000048028	ENSG00000048028	ENST00000544750_USP28	Q96RU2-2	11_113745608_C_G	rs4288784	4.112224279486555e-07	4.0598662133545365e-09	16.0	2.013486963351715e-13	1.1761087214595516	0.002454066871081153	0.2876960013257076	0.4734710326299551	0.5225588464120223	0.13089826122735418	-0.206054955872075	False	113745608			11_113745608_C_G;		11_113745608_C_G;	11_113745608_C_G;		0.054455445544554455	11	-1	113668596	113746292
ENSG00000048342	ENSG00000048342	ENST00000514450_CC2D2A	Q9P2K1-2	4_15513147_C_T	rs1058412	1.3161281517481498e-06	1.3161129944878351e-08	17.0	5.769335427028867e-14	-0.6834376159643388	0.2533223501177529	0.07620893606225752	0.07485091720557352	-0.06135250313577259	0.7105413036062991	0.05438110772220362	True	15513147,15473015,15474996,15477812,15478101,15483090,15483288,15484499,15485238,15489792,15503368,15520447,15524163,15527808,15527897,15530124,15534646,15537712,15537964		4_15527897_AC_A;4_15484499_AT_A;4_15484498_CA_C;4_15473015_TG_T;			4_15537964_G_A;4_15537712_G_T;4_15534646_C_T;4_15530124_C_A;4_15527897_AC_A;4_15527808_A_G;4_15524163_G_T;4_15520447_G_A;4_15503368_T_G;4_15489792_G_T;4_15485238_C_T;4_15484499_AT_A;4_15484498_CA_C;4_15483288_T_C;4_15483090_G_A;4_15478101_G_A;4_15477812_C_G;4_15474996_C_T;4_15473015_TG_T;4_15513147_C_T;			0.36386138613861385	4	1	15471489	15603180
ENSG00000048544	ENSG00000048544	ENST00000053468_MRPS10	P82664	6_42158596_A_C		3.766678076398878e-07	5.9012175932290114e-08	1.0	2.4434248400504556e-13	0.4907302319062623	5.20022966724784e-27	0.7421291790450859	2.435629187947605	0.13217546354455756	0.8041083209588124	-0.0227570153951544	True	42158596,42159132,42159228,42159557,42159568,42159652,42159705,42159859,42160041,42160070,42160217,42160445,42160593,42161127,42161786,42162388,42163750,42163839,42163924,42164401,42164560,42164874,42165700,42166050,42166552,42167161,42167970,42168542,42168601,42168677,42169045,42169203,42169224,42170356,42170761,42170785,42170880,42171359,42171545,42171560,42173254,42174611,42174963,42174984,421…		6_42182375_GA_G;6_42182322_CA_C;6_42182221_GA_G;		6_42175927_G_A;6_42175268_G_A;6_42175221_A_G;6_42175063_A_G;6_42174984_C_T;6_42174976_TGAGACGGC_TTGAGACGGT;6_42174611_G_T;	6_42184400_C_T;6_42183686_G_A;6_42183000_C_T;6_42182762_C_A;6_42182512_G_A;6_42182375_GA_G;6_42182322_CA_C;6_42182322_C_T;6_42182221_GA_G;6_42181960_A_C;6_42181773_G_A;6_42181256_T_A;6_42180404_G_A;6_42180105_T_A;6_42180066_T_C;6_42180000_T_C;6_42179387_G_C;6_42179091_G_A;6_42178953_G_A;6_42178578_C_G;6_42177380_C_G;6_42177028_A_G;6_42176120_G_T;			0.37376237623762376	6	-1	42174539	42185603
ENSG00000049167	ENSG00000049167	ENST00000265038_ERCC8	Q13216	5_60095726_T_C	rs7709444	1.6391033858720908e-07	2.4522929979173132e-09	10.0	3.878811761348064e-16	-0.5684460464056491	7.61087242891198e-19	-0.7291019185738888	0.08089532703310234	-0.4329657615349469	0.0034775755860612717	-0.3027882623510156	True	60095726,60083275,60083903,60084491,60085763,60088148,60088250,60088255,60088794,60089137,60090951,60091046,60091192,60091330,60091556,60091673,60091818,60092687,60093387,60093612,60095272,60095668,60095883,60096497,60098267,60103492,60117202,60117723,60119737								0.4851485148514851	5	-1	60169658	60240900
ENSG00000049239	ENSG00000049239	ENST00000377403_H6PD	R4GMU1	1_9294903_C_G		6.305204771533727e-08	2.9911776733144397e-09	3.0	1.2371652467619522e-14	-0.31767442493857434	1.4175961322467472e-14	-0.3476695560524873	0.000755954300368668	-0.4444064127110369	0.039518595955897344	-0.1869671899862156	False	9294903,9290707,9291666,9292606,9295444,9295794,9300608,9300677,9303926,9306849,9307896,9308014,9308037,9308966,9309746,9310040,9310655,9315338		1_9307896_T_TTGGG;1_9303926_C_CGTG;		1_9294903_C_G;	1_9310655_T_C;1_9310040_G_A;1_9309746_G_T;1_9308966_C_G;1_9308037_C_T;1_9308014_G_T;1_9307896_T_TTGGG;1_9306849_T_C;1_9303926_C_CGTG;1_9300677_T_C;1_9300608_T_C;1_9295794_G_C;1_9295444_T_C;			0.4678217821782178	1	1	9294834	9331396
ENSG00000049245	ENSG00000049245	ENST00000054666_VAMP3	Q15836	1_7836659_A_C	rs11121022	0.005825310866151191	0.0006251029499198546	3.0	4.034557944669152e-08	0.3291795363855262	3.3768389066221324e-08	0.3866687139484605	0.481613239961726	0.19540212700117388	0.8619854450265982	0.016803706958180342	True	7836659,7835699					1_7835699_G_A;1_7836659_A_C;			0.4777227722772277	1	1	7831329	7841492
ENSG00000049283	ENSG00000049283	ENST00000268933_EPN3	Q9H201	17_48597114_C_T	rs28498091	0.00870321739730662	0.00015349618272435318	19.0	5.606112428257284e-08	0.6047685315404958	3.764850819316202e-05	0.3956469799636342	0.34164530739354715	0.47157296008196203	0.1755251138165205	0.12067795139804015	False	48597114,48598291,48602412,48610732					17_48610732_G_A;	17_48610732_G_A;		0.14356435643564355	17	1	48609904	48621111
ENSG00000049323	ENSG00000049323	ENST00000404525_LTBP1	C9JDW2	2_33158828_C_T	rs150702	0.008067096019261229	0.00017857297939602017	15.0	1.0632909398552963e-07	-0.3839314642723188	2.007377059717177e-10	-0.39453136483565815	0.3495273514910649	-0.060580567292395575	0.0572819565111308	-0.12214687649692048	False	33158828,33157471,33157792,33158042,33158660,33158912								0.4108910891089109	2	1	33172039	33624576
ENSG00000049449	ENSG00000049449	ENST00000054950_RCN1	Q15293	11_32111895_C_T	rs11031584	2.0237156147213902e-05	3.7651730818579796e-07	11.0	7.142786547654468e-13	-0.9244420277973088	7.992275470245008e-11	-0.8562215130988065	0.00199177153880245	-0.4059123635175813	0.002017270631509695	-0.3816637943209755	False	32111895,32104756,32111460,32112143,32113354,32114379,32132038					11_32114379_C_T;11_32113354_C_A;			0.16584158415841585	11	1	31833939	32127301
ENSG00000049541	ENSG00000049541	ENST00000055077_RFC2	H7C5P4	7_73710273_C_T	rs35184374	0.07804051438003116	0.002816446855125017	12.0	1.6876534726744304e-05	-0.5819456397252666	0.00015532608608099542	-0.4336159526965055	6.313685759571031	-0.17965658298027964	0.7444943520173662	-0.17010357820775646	False	73710273								0.0594059405940594	7	-1	73645829	73668774
ENSG00000049656	ENSG00000049656	ENST00000511268_CLPTM1L	Q96KA5-2	5_1320722_C_T	rs402710	1.8461782722309166e-18	4.77721971172432e-21	16.0	8.662600223780596e-30	-0.9395603557921476	0.008092882362450487	0.11528871447561816	4.505619630042868	-0.11025244262742434	0.5378024111318397	0.04528275996919938	False	1320722					5_1320722_C_T;			0.34405940594059403	5	-1	1317859	1345214
ENSG00000049759	ENSG00000049759	ENST00000356462_NEDD4L	Q96PU5	18_55703738_G_A	rs6566922	2.9377480531509634e-20	2.764288923218973e-23	37.0	3.134189619274077e-29	-1.4718220154660595	0.12865292581234028	0.1088918986660253	0.4884115331445883	-0.431980694838634	0.1282470955267747	0.17510883336923655	False	55703738,55700269,55701305,55701401,55701402,55702221,55702338,55702354,55702481,55702568,55703794,55703901,55703961,55704149,55704165,55704166,55704365,55704834,55704837,55704899,55705167,55705318,55705406,55705573,55705714,55705838,55705910,55705916,55706031,55706114,55706128,55706250,55706539,55706576,55706867,55706887,55707379,55707466,55707479,55707614,55707918,55707946,55708115,55708136,557…		18_55714196_GGCAGTTTCAT_G;		18_55711618_T_G;	18_55732115_G_T;18_55731120_A_C;18_55726323_C_T;18_55721315_A_G;18_55721069_T_C;18_55721004_C_G;18_55720975_T_C;18_55720915_G_A;18_55720731_C_T;18_55720701_C_T;18_55720490_T_A;18_55720220_C_T;18_55720066_C_T;18_55719849_A_G;18_55719738_T_G;18_55719611_C_G;18_55719519_A_G;18_55718496_C_G;18_55718481_C_T;18_55718345_T_C;18_55717731_G_A;18_55717711_A_G;18_55717576_C_T;18_55717529_A_T;18_55717494_A_G…			0.11386138613861388	18	1	55711599	56068772
ENSG00000049860	ENSG00000049860	ENST00000261416_HEXB	P07686	5_73970597_C_T	rs820841	0.0011213615427618064	2.3893078852071492e-05	13.0	2.069842568444568e-07	-0.2267210850972097	1.8373126052470336e-07	-0.2434106506749248	0.0015685895749278282	-0.3853238020481085	0.006960783689090204	-0.1836989413181893	True	73970597,73972457,73972734,73978074,73978221,73978701,73979130,73979807,73980065,73980111,73980214,73980621,73980703,73980704,73980799,73980960,73980963,73987048,73991185		5_73980963_GC_G;5_73980959_GC_G;			5_73991185_C_T;5_73987048_C_T;5_73980963_GC_G;5_73980960_C_T;5_73980959_GC_G;5_73980799_G_C;5_73980704_T_G;5_73980703_A_T;5_73980621_G_C;5_73980214_C_T;5_73980111_C_T;5_73980065_C_T;5_73979807_A_G;5_73979130_T_C;5_73978701_G_A;5_73978221_A_G;5_73978074_G_T;5_73972734_C_T;5_73972457_G_A;5_73970597_C_T;			0.4752475247524752	5	1	73935848	74018472
ENSG00000050327	ENSG00000050327	ENST00000474817_ARHGEF5	Q12774	7_143868570_G_A	rs1635887	4.635486226161281e-08	1.6274907533629058e-09	4.0	5.068032616227401e-14	0.9592227493784328	0.5660779285159168	-0.07716622142571514	0.13913070957665408	0.5598057778073817	0.6141771113876745	0.05551858601612336	False	143868570,143754401,143773851,143776656,143779362,143781396,143781438,143785137,143786769,143787284,143787460,143789204,143790107,143790142,143790720,143790733,143791220,143791977,143792991,143793162,143793628,143794316,143794407,143794799,143795398,143795775,143796056,143796662,143796891,143797346,143797683,143797781,143799688,143799911,143800459,143800680,143800734,143803687,143803978,143804028…								0.14603960396039606	7	1	144052381	144077725
ENSG00000050393	ENSG00000050393	ENST00000488770_MCUR1	Q96AQ8	6_13791292_T_C		5.812095678594531e-05	3.192482571046396e-06	4.0	2.99423651244009e-13	-0.6170004678754921	0.0064972509797179825	0.1883750406820831	2.0046440324309214	-0.11470999911520875	0.84508246268884	0.020297046645799427	False	13791292,13767003,13767854,13769138,13770977,13771073,13774631,13777863,13779324,13779480,13781360,13782359,13784613,13786316,13787316,13790302,13794110				6_13790302_T_G;6_13787316_T_C;	6_13794110_C_A;6_13790302_T_G;6_13791292_T_C;	6_13794110_C_A;6_13791292_T_C;		0.3341584158415842	6	-1	13786789	13814800
ENSG00000050555	ENSG00000050555	ENST00000361069_LAMC3	Q9Y6N6	9_133926152_C_G	rs10901331	0.00012824112226482911	7.458860851559398e-06	4.0	2.748366526428104e-10	0.4541423687532425	1.3941131636815278e-10	0.4607346738901834	0.12222232429107435	-0.5132527294702971	0.3850345351618336	-0.11929893292031556	False	133926152,133915854,133916145,133916387,133922072,133922634,133926616,133927185,133927878,133928345,133928790	9_133927878_A_G;	9_133927185_CACTGGGAAAGGAGGAGGGAGGGT_C;9_133922634_CTCCGCCTCCCAGGTTCAAGTGATTT_C;	9_133927878_A_G;		9_133928790_G_C;9_133927185_CACTGGGAAAGGAGGAGGGAGGGT_C;9_133926616_C_A;9_133922634_CTCCGCCTCCCAGGTTCAAGTGATTT_C;9_133922072_C_T;9_133916387_G_T;9_133916145_C_A;9_133915854_G_C;9_133926152_C_G;		9_133928345_C_T;	0.4653465346534654	9	1	133884469	133969860
ENSG00000050748	ENSG00000050748	ENST00000347470_MAPK9	P45984-2	5_179689027_A_C	rs35067749	8.788712806592026e-06	1.2993102732362854e-07	13.0	9.632788722551344e-11	-0.4891758274516705	0.91220664075865	0.010539731557253854	1.461683658893283	-0.14160679620113648	0.6678017224684251	0.03697381433082647	False	179689027,179639886,179642397,179642945,179642976,179642990,179643092,179651700,179655439,179693083,179694178					5_179694178_C_T;5_179693083_T_C;5_179689027_A_C;			0.19554455445544555	5	-1	179660143	179719099
ENSG00000050767	ENSG00000050767	ENST00000390654_COL23A1	Q86Y22	5_177888966_C_T	rs1846371	0.05392946175300777	0.007416575802467008	3.0	8.964915814099614e-06	0.31018785230245416	3.5116836781558855e-06	0.3342750771250113	0.22113161613654736	0.061629479597328014	0.7429838732864218	-0.050848247966252084	False	177888966,177882629,177884471,177886112,177886579,177886624,177886913,177888014,177888991,177890055					5_177890055_G_A;5_177888991_A_T;5_177888014_C_A;5_177886913_C_T;5_177886624_G_A;5_177886579_G_A;5_177886112_C_T;5_177884471_C_T;5_177882629_G_A;5_177888966_C_T;			0.4925742574257426	5	-1	177664619	178017556
ENSG00000051108	ENSG00000051108	ENST00000379792_HERPUD1	H3BV54	16_56982299_T_C	rs173538	0.001996949013882043	3.0509664390179908e-05	19.0	4.0364432019712464e-08	0.5185836929876545	0.08959129097096376	0.15208098062271455	0.2277637145477819	-0.16013724804636995	0.24351373925731484	-0.15373665408426662	False	56982299,56963142,56964407,56966011				16_56966011_G_A;				0.3762376237623761	16	1	56965960	56977798
ENSG00000051128	ENSG00000051128	ENST00000599097_HOMER3	Q9NSC5-2	19_19050957_A_G	rs1122821	1.0131846070741629e-06	1.307204865540919e-08	13.0	3.685277345161985e-14	-0.6918656141440217	2.5399447548568736e-14	-0.7033107786618019	0.00029958452927395	-0.5164955374417683	7.544254290498216e-05	-0.3923359528852641	False	19050957				19_19050957_A_G;	19_19050957_A_G;			0.3712871287128713	19	-1	19040010	19052070
ENSG00000051180	ENSG00000051180	ENST00000382643_RAD51	Q06609	15_40995335_T_C	rs4924496	1.3705488183568122e-17	5.847276347002503e-20	11.0	1.036952257527638e-30	-1.05825214134959	0.5253954117498125	-0.05337573956572059	0.2193258935514412	-0.18678098427511136	1.7818320282897495	0.01030594219934583	True	40995335,40844222,40845952,40846615,40846661,40848351,40850020,40853666,40855210,40856113,40856486,40856521,40858818,40860709,40862064,40864636,40867122,40869650,40874080,40876346,40877516,40878978,40879108,40879181,40882316,40882965,40884719,40889824,40893976,40894153,40894561,40894715,40894835,40897888,40906141,40908255,40910137,40910668,40916237,40922765,40925936,40929373,40930868,40931357,409…		15_41005760_G_GTTTC;15_40993574_CT_C;		15_41024094_G_A;15_40987565_G_C;	15_41020610_G_A;15_41017911_A_G;15_41012141_A_G;15_41011738_G_A;15_41011311_G_A;15_41009668_A_G;15_41008342_C_T;15_41007577_C_T;15_41005760_G_GTTTC;15_41005760_G_C;15_41005530_T_C;15_41003463_G_A;15_41002528_T_C;15_40993574_CT_C;15_40989391_C_T;15_40987565_G_C;15_40995335_T_C;	15_41020610_G_A;15_41017911_A_G;15_41012141_A_G;15_41011738_G_A;15_41011311_G_A;15_41009668_A_G;15_41008342_C_T;15_41007577_C_T;15_41005760_G_GTTTC;15_41005760_G_C;15_41005530_T_C;15_41003463_G_A;15_41002528_T_C;15_40993574_CT_C;15_40989391_C_T;15_40987565_G_C;15_40995335_T_C;		0.4158415841584158	15	1	40986972	41024354
ENSG00000051523	ENSG00000051523	ENST00000562209_CYBA	P13498	16_88713501_A_G	rs4782393	9.560534097274429e-09	1.2470750780848438e-10	10.0	3.934852083381437e-21	0.7946734710691914	0.006091466066158413	-0.17699478044855474	0.0027657997088002977	0.8841284489623424	0.2122069987212133	0.151311138375395	False	88713501			16_88713501_A_G;		16_88713501_A_G;			0.4678217821782178	16	-1	88709691	88717560
ENSG00000051825	ENSG00000051825	ENST00000606320_MPHOSPH9	A0A0A0MTP3	12_123635096_C_T	rs1716183	7.250102426203783e-09	3.591400284409616e-11	26.0	3.621135429657447e-14	-0.4131201849862198	2.617822128167865e-17	-0.6201444021491839	0.1396172433187456	-0.4088926874878187	0.5012010824640452	0.091130232912503	False	123635096,123593485								0.1905940594059406	12	-1	123636867	123728561
ENSG00000052802	ENSG00000052802	ENST00000507013_MSMO1	Q15800	4_166304912_C_T	rs17489060	0.001954247836429565	0.00011327373956627728	5.0	3.2773370327954055e-08	0.9626525496240972	0.02028684259566919	0.3473652462556	0.7606391456159027	-0.05420679111634197	0.7583052194659006	-0.041400444881524716	False	166304912,166306416,166306761								0.05198019801980198	4	1	166248775	166264312
ENSG00000052841	ENSG00000052841	ENST00000534347_TTC17	Q96AE7	11_43343072_T_C	rs5743221	1.7942233292576434e-33	5.9089923805238786e-37	15.0	1.8960719152335454e-47	1.491863065125197	0.09240271810957992	0.10212792438407396	0.2168347044635018	0.4272764729173917	0.36244684527312176	0.0950422801418802	False	43343072,43289974,43299504,43319878,43344442,43352654,43355682,43358280,43358480,43367894,43382213,43387044,43387483,43391648,43392693,43394977,43395522,43400284,43406806,43409947,43411677,43412676,43419910,43424629,43432306,43450864,43450927,43454840,43458144,43459128,43459162,43460481,43462817,43464293,43475928,43480174,43480513,43481640,43486684,43489206,43493968,43496399,43496513,43496607,435…		11_43496399_TAAG_T;11_43480498_TAATAGTTTGTATAAGGTTCG_T;11_43424629_TAAAG_T;11_43409947_TAGG_T;		11_43391648_C_T;	11_43500468_C_T;11_43496607_G_C;11_43496513_G_A;11_43496399_TAAG_T;11_43493968_T_C;11_43489206_G_A;11_43486684_C_T;11_43481640_C_T;11_43480513_G_A;11_43480498_TAATAGTTTGTATAAGGTTCG_T;11_43480174_G_A;11_43475928_C_G;11_43464293_G_C;11_43462817_C_T;11_43460481_C_T;11_43459162_A_G;11_43459128_C_T;11_43458144_A_G;11_43454840_C_T;11_43450927_C_T;11_43450864_G_T;11_43432306_T_C;11_43424629_TAAAG_T;11_4…	11_43411677_C_T;11_43409947_TAGG_T;11_43406806_T_A;11_43400284_C_T;11_43395522_A_G;11_43394977_C_T;11_43392693_A_G;11_43391648_C_T;11_43387483_T_C;11_43387044_C_G;11_43382213_A_G;		0.2425742574257425	11	1	43380482	43516483
ENSG00000053254	ENSG00000053254	ENST00000555658_FOXN3	O00409-2	14_89696772_C_T	rs59058749	4.0539646966984857e-13	1.7324635455976437e-15	18.0	2.890840070904141e-20	-1.0928672666525936	0.9139930980661872	-0.006053066750847547	0.9174464322906976	-0.08088503994457262	0.7334719528441054	0.04227632914547863	False	89696772,89679668,89683477,89685722,89687730,89688228,89690579,89698829,89699776,89702268,89703643,89708314,89713032,89718597,89719634,89721244,89722699,89724546,89724743,89726231,89726777,89729806,89730408,89738852,89738920,89738967,89739889,89740076,89742868		14_89742868_CT_C;14_89730408_AAAAG_A;14_89699776_AGGAG_A;14_89699776_AGGAGCTGGAATTTCCC_A;14_89683477_TG_T;			14_89742868_CT_C;14_89740076_C_T;14_89739889_G_A;14_89738967_G_A;14_89738920_G_A;14_89738852_A_G;14_89730408_AAAAG_A;14_89729806_T_C;14_89726777_G_A;14_89726231_T_C;14_89724743_C_G;14_89724546_G_A;14_89722699_T_C;14_89721244_C_A;14_89719634_C_T;14_89718597_T_C;14_89713032_G_A;14_89708314_G_A;14_89703643_C_A;14_89702268_G_A;14_89699776_AGGAG_A;14_89699776_AGGAGCTGGAATTTCCC_A;14_89698829_C_T;14_896…	14_89742868_CT_C;14_89740076_C_T;14_89739889_G_A;14_89738967_G_A;14_89738920_G_A;14_89738852_A_G;14_89730408_AAAAG_A;14_89729806_T_C;14_89726777_G_A;14_89726231_T_C;14_89724743_C_G;14_89724546_G_A;14_89722699_T_C;14_89721244_C_A;14_89719634_C_T;14_89718597_T_C;14_89713032_G_A;14_89708314_G_A;14_89703643_C_A;14_89702268_G_A;14_89699776_AGGAG_A;14_89699776_AGGAGCTGGAATTTCCC_A;14_89698829_C_T;14_896…		0.1782178217821782	14	-1	89591215	90085493
ENSG00000053371	ENSG00000053371	ENST00000235835_AKR7A2	O43488	1_19638090_G_C	rs4911983	4.6012567272929435e-05	1.986192918038709e-06	5.0	1.0104944182915387e-10	0.5255948045219389	3.799500305150162e-11	0.4279326176826039	0.03827005501096558	0.3320526717954162	0.0007892806947782571	0.2976294860545168	False	19638090					1_19638090_G_C;			0.19306930693069307	1	-1	19630459	19638640
ENSG00000053372	ENSG00000053372	ENST00000330263_MRTO4	Q9UKD2	1_19583725_T_C	rs1738017	0.0019560177280570786	0.00018911392289613246	3.0	1.509652049308375e-08	-0.30459563555120744	1.74404158697466e-10	-0.3165095390921193	0.1723062150624085	-0.3323800028480484	0.04954781095739762	-0.2279591308321089	False	19583725,19576035,19579312,19579969,19580826,19580857,19581226,19581467,19581934,19583684,19584004,19585903,19586015,19586294		1_19579312_GT_G;		1_19586015_G_T;1_19585903_G_A;	1_19583684_C_T;1_19581934_G_T;1_19581467_C_T;1_19581226_G_A;1_19580857_G_C;1_19580826_A_G;1_19579969_A_G;1_19579312_GT_G;1_19583725_T_C;		1_19584004_G_A;	0.2277227722772277	1	1	19578033	19586622
ENSG00000053501	ENSG00000053501	ENST00000595101_USE1	Q9NZ43	19_17303774_T_G	rs1545620	0.027748545728288384	0.0009660749865412092	11.0	3.428432589893931e-07	-0.3309295161784401	2.2587172108335075e-13	-0.43667914949584535	1.6391657179951609	-0.09465378673666007	0.3772568125504011	-0.07213730522963324	False	17303774,17293208,17298352,17298551,17298615,17298679,17298724,17298893,17298946,17299009,17299170,17299178,17299187,17299234,17299445,17299646,17299651,17299704,17300269,17300529,17300594,17300601,17300841,17301521,17301699,17301706,17301733,17301863,17302112,17302247,17302611,17302765,17302811,17302852,17303397,17303411,17303460,17304236,17305440,17306978,17307182,17307523,17308085,17308105,173…								0.3985148514851485	19	1	17326155	17330638
ENSG00000054282	ENSG00000054282	ENST00000476722_SDCCAG8	Q86SQ7	1_243433141_C_G	rs10926979	4.741334149037998e-09	4.246280037364742e-11	14.0	2.2215947936722353e-15	0.6065165243156482	3.8346278093597915e-05	0.2869037826497164	0.7367178160249731	0.28657433606292737	0.08026313917647128	0.17144999738248778	False	243433141,243378987,243380482,243380513,243381354,243383661,243385636,243385960,243386036,243388370,243389459,243390568,243396119,243403293,243405094,243407782,243408056,243409152,243409163,243409926,243410208,243411386,243412936,243414691,243414712,243416525,243416792,243417827,243418182,243420388,243421494,243425689,243426813,243428152,243430544,243431654,243433654,243434927,243435622,243437266…	1_243493907_A_T;	1_243499085_C_CACTC;1_243495177_TAGG_T;1_243495175_CGTA_C;1_243475069_TA_T;1_243473171_TG_T;1_243473170_TTG_T;1_243467374_CA_C;1_243465649_GA_G;1_243453512_C_CCGAT;1_243430544_TA_T;1_243426813_ACTT_A;		1_243469029_G_A;1_243468694_C_A;	1_243500994_C_T;1_243499085_C_CACTC;1_243498108_G_A;1_243495177_TAGG_T;1_243495175_CGTA_C;1_243492567_A_G;1_243488186_C_G;1_243485126_T_G;1_243483368_C_T;1_243483279_A_T;1_243475069_TA_T;1_243473171_TG_T;1_243473170_TTG_T;1_243472801_T_G;1_243472664_A_G;1_243472187_C_A;1_243471949_C_A;1_243469029_G_A;1_243468694_C_A;1_243467689_G_T;1_243467374_CA_C;1_243467236_G_A;1_243465649_GA_G;1_243463189_C_T…			0.36386138613861385	1	1	243419320	243663394
ENSG00000054690	ENSG00000054690	ENST00000558386_PLEKHH1	Q9ULM0	14_68034242_T_C	rs10139749	0.044973038803307004	0.0010669638289713128	17.0	1.3661339870934426e-06	0.4359418178417107	0.00022121481843893404	0.34777502859553405	0.3045564032154457	0.04115557835314032	0.6516246029222266	-0.04414938469401042	False	68034242					14_68034242_T_C;			0.2821782178217821	14	1	68000018	68056329
ENSG00000054983	ENSG00000054983	ENST00000261304_GALC	P54803	14_88449654_T_C	rs77307507	0.035739687443735825	0.0009393823595342467	15.0	1.2612929580838285e-07	-0.4388504609607041	1.1921162811034047e-09	-0.5784424800660083	0.04234790154780944	-0.4495059362844565	0.0015160421889398867	-0.44552082924825065	False	88449654,88391492,88393995,88394665,88398224,88399950,88402596,88403734,88405272,88408278,88409965,88410395,88417443,88417651,88417897,88418613,88418729,88418768,88419242,88420282,88420511,88421100,88421350,88421482,88421564,88421619,88421677,88421908,88422855,88422929,88423662,88424458,88424606,88424652,88425686,88425835,88426381,88426412,88427352,88428283,88429344,88429427,88429690,88429980,884…	14_88459448_C_G;14_88442712_C_T;	14_88455067_TA_T;14_88451566_TATTAA_T;14_88451565_ATAT_A;14_88449662_TA_T;14_88446303_A_AC;14_88445472_A_AT;14_88445056_AGG_A;14_88442993_TC_T;14_88441731_G_GATA;14_88440560_TAAAAG_T;14_88439785_CAAG_C;14_88439096_CATAA_C;14_88434207_TA_T;14_88433885_TA_T;14_88432846_TA_T;14_88432787_TA_T;14_88427352_AC_A;14_88424652_GAAGT_G;14_88424458_CAAGGCTATAGTAACCAA_C;14_88422929_C_CTA;14_88422855_ATG_A;14_…		14_88459150_C_T;14_88458745_C_T;14_88446978_G_C;14_88442712_C_T;14_88399950_C_T;	14_88459656_A_G;14_88459467_C_G;14_88459448_C_G;14_88459280_C_A;14_88459150_C_T;14_88458745_C_T;14_88458573_A_G;14_88457929_G_C;14_88457698_T_C;14_88457174_A_T;14_88456985_T_A;14_88456972_G_A;14_88456899_A_G;14_88456877_A_G;14_88456428_T_G;14_88456281_C_T;14_88456200_C_T;14_88456144_A_G;14_88455963_C_T;14_88455875_G_A;14_88455711_T_C;14_88455605_C_A;14_88455488_C_T;14_88455067_TA_T;14_88454937_C_…	14_88459467_C_G;14_88459448_C_G;14_88459280_C_A;14_88459150_C_T;14_88458745_C_T;14_88458573_A_G;14_88457929_G_C;14_88457698_T_C;14_88457174_A_T;14_88456985_T_A;14_88456972_G_A;14_88456899_A_G;14_88456877_A_G;14_88456428_T_G;14_88456281_C_T;14_88456200_C_T;14_88456144_A_G;14_88455963_C_T;14_88455875_G_A;14_88455711_T_C;14_88455605_C_A;14_88455488_C_T;14_88455067_TA_T;14_88454937_C_T;14_88454469_A_…	14_88459467_C_G;	0.10891089108910892	14	-1	88304164	88460009
ENSG00000055147	ENSG00000055147	ENST00000351797_FAM114A2	Q9NRY5	5_153305438_T_C	rs1461241	0.010330337412532059	0.00020691551336903647	17.0	4.0865788964115976e-07	-0.3859787673498563	1.8818251964001213e-07	-0.4080429344923076	0.07286719577669626	-0.6790055179069223	0.8818683253464379	-0.013488753882221484	False	153305438,153303901,153306266,153306311,153306598,153306780,153309337,153309504,153309888,153310081,153310122,153310324,153310472,153310598,153312211,153313826,153315450,153316866,153317033,153318776,153320104,153320752,153321202,153321265,153322777,153323431,153324358,153325893,153326223,153326505,153327133,153329433,153332555,153333575,153334883,153335580,153336744,153337438,153340031,153341832…								0.3712871287128713	5	-1	153369688	153418496
ENSG00000055208	ENSG00000055208	ENST00000470466_TAB2	Q9NYJ8	6_149793000_A_G		0.09324088511396994	0.004157565225441779	10.0	1.158844973628727e-06	0.3705403670278785	0.08361042491908288	-0.11113453723526397	0.05663346841036414	0.7111652883597395	0.6629531338907532	-0.039437629900289206	True	149793000,149778811,149778892,149779064,149779185,149779364,149779510,149780096,149780292,149780318,149780474,149780695,149780737,149781159,149781185,149781473,149781493,149781598,149782254,149782345,149782565,149782646,149782798,149782847,149782908,149783276,149783480,149783532,149783544,149783587,149783635,149783891,149784091,149784284,149784344,149784536,149784574,149784618,149784833,149785091…								0.4257425742574257	6	1	149539777	149732749
ENSG00000055332	ENSG00000055332	ENST00000395127_EIF2AK2	P19525	2_37376314_G_C	rs2307466	9.007337693392657e-10	1.4514293860206936e-11	7.0	2.4932553190266168e-17	1.404564096477722	0.3105626097166989	0.09423612439558636	1.1483752929759925	0.4756435152422896	0.8002526647241609	0.031421510210181136	False	37376314				2_37376314_G_C;	2_37376314_G_C;			0.07178217821782178	2	-1	37326353	37384208
ENSG00000055483	ENSG00000055483	ENST00000588130_USP36	Q9P275	17_76787885_T_C	rs62075586	2.1656249647266446e-22	2.3667684423961122e-25	24.0	2.6959986502900656e-41	1.1348355302693922	8.166517095512452e-11	0.35798030373861345	0.6449298980742926	0.3186423750332841	0.7421831241057315	0.027344568136374203	False	76787885,76661528,76661542,76675803,76677481,76680260,76680261,76691564,76692298,76693551,76696986,76698950,76710245,76722462,76726515,76728668,76729757,76730039,76737190,76739141,76739850,76757296,76762039,76767803,76772039,76772288,76773638,76775673,76776917,76777694,76781936,76783642,76784198,76785121,76787000,76789886,76790279,76791217,76792179,76793600,76793728,76793825,76793885,76794774,767…	17_76799860_T_C;17_76799795_G_A;17_76798548_TTTTTTC_T;	17_76785121_A_AG;		17_76793885_G_A;17_76793825_G_A;17_76793728_G_A;17_76793600_G_A;17_76792179_G_A;17_76783642_A_G;	17_76800182_G_C;17_76799898_A_G;17_76799860_T_C;17_76799795_G_A;17_76798362_C_T;17_76798155_C_T;17_76796854_T_C;17_76796463_C_T;17_76794981_A_G;17_76794774_T_C;17_76793885_G_A;17_76793825_G_A;17_76793728_G_A;17_76793600_G_A;17_76792179_G_A;17_76791217_G_A;17_76790279_C_T;17_76789886_C_T;17_76787000_G_A;17_76785121_A_AG;17_76785121_A_G;17_76784198_T_C;17_76787885_T_C;	17_76800182_G_C;17_76799898_A_G;17_76799860_T_C;17_76799795_G_A;17_76798548_TTTTTTC_T;17_76798548_T_C;17_76798362_C_T;17_76798155_C_T;17_76796854_T_C;17_76796463_C_T;17_76794981_A_G;17_76794774_T_C;17_76793885_G_A;17_76793825_G_A;17_76793728_G_A;17_76793600_G_A;17_76792179_G_A;17_76791217_G_A;17_76790279_C_T;17_76789886_C_T;17_76787000_G_A;17_76785121_A_AG;17_76785121_A_G;17_76784198_T_C;17_76783…	17_76799898_A_G;17_76798548_T_C;	0.4158415841584158	17	-1	76783463	76837523
ENSG00000055917	ENSG00000055917	ENST00000424110_PUM2	C9JW01	2_20386961_A_G	rs72783275	0.02947756764407862	0.0009471052569717881	12.0	2.4926004032414225e-06	-0.5180025713765418	0.8037677215311344	0.01816254815281556	0.09768606759722648	-0.5187071618195996	0.6759508223154087	-0.029721520275418637	False	20386961,20386297,20388705								0.15346534653465346	2	-1	20448452	20551995
ENSG00000055950	ENSG00000055950	ENST00000342071_MRPL43	Q8N983-4	10_102714887_C_T		5.199889933675031e-39	6.989803990556886e-43	14.0	6.155096560467822e-50	1.5500514081293166	0.6696802618569486	0.02089043856061982	0.9489711733173676	0.2105001490167413	0.15098792207562955	-0.14746917215026525	True	102714887,102646342,102648752,102652974,102653765,102664608,102670196,102672718,102673292,102679269,102692604,102692643,102692970,102695909,102700479,102703434,102705058,102715183,102722916,102731759,102732813,102733407,102733532,102733776,102733779,102734778,102738551,102740271,102742763,102744214,102745062,102746503,102750621,102750623,102750851,102751706,102752162,102752745,102754033,102754238…		10_102733777_CCT_C;10_102733532_AT_A;	10_102746503_C_T;	10_102746503_C_T;10_102738551_A_G;	10_102746503_C_T;10_102745062_G_T;10_102744214_T_C;10_102742763_C_A;10_102740271_T_C;10_102738551_A_G;10_102734778_C_G;10_102733779_T_C;10_102733777_CCT_C;10_102733776_C_T;10_102733532_AT_A;10_102733407_C_A;10_102732813_A_C;10_102731759_T_A;		10_102746503_C_T;	0.19554455445544555	10	-1	102729215	102747272
ENSG00000056050	ENSG00000056050	ENST00000393381_C4orf27	Q9NWY4	4_170678993_T_C	rs11540095	2.426120958712057e-15	4.8130526350988035e-17	3.0	2.5579940748859312e-26	-1.1582342424073326	3.7325606831369084e-30	-1.2405919509279435	9.551625641209698e-10	-0.7756160063929438	1.2461604550044785e-12	-0.869198063972207	False	170678993							4_170678993_T_C;	0.16336633663366334	4	-1	170650616	170679104
ENSG00000056661	ENSG00000056661	ENST00000579882_PCGF2	P35227	17_36893090_A_C	rs111757224	9.890828350227104e-05	3.2374455802403463e-06	7.0	6.246944101421633e-11	0.5537723086357734	0.021119011585436304	-0.13441769877392007	1.2686146052230636	0.14321901791155245	0.32327816837031703	0.0885025825940211	False	36893090,36890949				17_36890949_T_C;	17_36890949_T_C;17_36893090_A_C;			0.4232673267326733	17	-1	36890150	36906070
ENSG00000057019	ENSG00000057019	ENST00000326840_DCBLD2	Q96PD2	3_98684579_T_C	rs7638009	2.0452608268298857e-10	2.1029057902296604e-12	10.0	1.4890587992737876e-13	0.2959854874657729	7.001591359722115e-13	0.38052186526048265	0.3439511003808789	0.277063676297852	0.25241171087163755	0.13311407690312205	False	98684579,98669857,98675416,98676793,98679141,98683264,98684652,98685053,98686870,98736153								0.19801980198019808	3	-1	98514785	98620533
ENSG00000057608	ENSG00000057608	ENST00000380191_GDI2	Q5SX86	10_5799613_A_G		6.910829230368892e-05	1.5346560323378578e-06	10.0	7.295746633164174e-10	-0.37054391448014296	8.831527974406935e-12	-0.4305003884434149	0.020567350093456047	-0.4190434052981773	0.06237507101536701	-0.07637660344832753	False	5799613,5760199,5764998,5767177,5768089,5768140,5770887,5774915,5784151,5793444,5793535,5794652,5797311,5798730,5799144,5801232,5802065,5805844,5808086,5813361,5823136,5826956,5828400,5835246,5840683,5849917,5855403,5865257	10_5808086_G_A;	10_5840683_GTA_G;10_5826956_CATT_C;		10_5855403_G_C;	10_5865257_T_C;10_5855403_G_C;10_5849917_C_G;10_5840683_GTA_G;10_5835246_C_A;10_5828400_G_A;10_5826956_CATT_C;10_5813361_A_G;		10_5808086_G_A;	0.1782178217821782	10	-1	5807186	5884095
ENSG00000058063	ENSG00000058063	ENST00000323116_ATP11B	Q9Y2G3	3_182513351_T_C	rs9283650	0.001113982929789849	3.0751798826355864e-05	10.0	1.056631344494428e-08	0.22677436342879914	3.053147116267272e-12	0.2981143987036739	0.8743618134702373	0.2595089385863476	0.1847210873408443	0.09557214613924103	False	182513351,182499467,182501020,182504827,182505064,182506463,182509174,182513714,182514636,182517073,182521143,182523388,182523413,182523868,182524054,182527198,182528871,182531596,182546378,182546697,182549676,182550851,182551879,182552324,182556608,182557989,182558423,182559414,182563768,182567400,182570789,182572260,182573482,182584720,182584933,182585500,182585686,182587666,182589764,182591147…		3_182617673_C_CGTA;3_182584720_T_TA;3_182572260_AAAAAC_A;3_182528871_TAATG_T;			3_182629859_G_A;3_182629855_C_G;3_182624759_C_T;3_182624011_T_C;3_182619485_C_T;3_182617906_G_A;3_182617673_C_CGTA;3_182617673_C_A;3_182617604_C_A;3_182615740_G_A;3_182615560_G_A;3_182615459_A_G;3_182604826_T_C;3_182598983_G_C;3_182591147_T_G;3_182589764_C_T;3_182587666_T_C;3_182585686_A_T;3_182585500_T_G;3_182584933_T_A;3_182584720_T_TA;3_182573482_A_G;3_182572260_AAAAAC_A;3_182570789_A_G;3_1825…	3_182629859_G_A;3_182629855_C_G;3_182624759_C_T;3_182624011_T_C;3_182619485_C_T;3_182617906_G_A;3_182617673_C_CGTA;3_182617673_C_A;3_182617604_C_A;3_182615740_G_A;3_182615560_G_A;3_182615459_A_G;3_182604826_T_C;3_182598983_G_C;		0.31683168316831684	3	1	182511288	182639423
ENSG00000058091	ENSG00000058091	ENST00000380050_CDK14	O94921	7_90200640_A_G	rs6465271	0.00015832926862670142	2.497910205260905e-06	15.0	6.29355078291531e-09	0.24639227462172164	4.0967136992175104e-10	0.25790713670902105	0.1244132802915891	0.23369662487237	0.3640831863491022	0.06679185585768632	False	90200640,90218346,90219720,90221052,90222467,90223051,90225470,90227810					7_90227810_C_A;7_90225470_C_T;7_90223051_G_T;7_90222467_G_A;7_90221052_C_T;7_90219720_T_C;7_90218346_T_G;7_90200640_A_G;			0.4876237623762376	7	1	90095738	90839905
ENSG00000058453	ENSG00000058453	ENST00000465021_CROCC	Q5TZA2	1_17287414_T_C	rs2273113	0.038344747663047116	0.0011698468154080928	13.0	6.2657935773142764e-06	-0.3634289890941253	0.003312143936927384	-0.21697769225921806	0.7157608215475765	-0.3678268154330746	0.030393693401225382	-0.2365185082404423	False	17287414,17276627,17290606		1_17290606_TTTTTC_T;			1_17290606_TTTTTC_T;1_17276627_C_T;		1_17287414_T_C;	0.4356435643564357	1	1	17066768	17299474
ENSG00000058729	ENSG00000058729	ENST00000508447_RIOK2	Q9BVS4	5_96498783_G_A	rs8654	2.8582786916827273e-16	2.1996364566164074e-18	7.0	3.015392155538325e-19	-0.8404311829395795	4.489348615347084e-05	0.2790185082652367	0.11977703931677372	-0.2575230159443769	0.5692627605079659	-0.05075283004836462	False	96498783,96503523	5_96503523_C_T;						5_96498783_G_A;	0.4034653465346535	5	-1	96496571	96518964
ENSG00000058799	ENSG00000058799	ENST00000465897_YIPF1	C9JFB2	1_54333168_C_A	rs12037642	9.66299453964503e-18	4.874560093445962e-20	9.0	9.548540949011862e-28	-1.1811544837875343	0.0014589237956243305	0.29011045662468066	0.07135596496132092	-0.12209832270733673	0.2421039900340564	-0.11154398066300576	False	54333168					1_54333168_C_A;	1_54333168_C_A;		0.1608910891089109	1	-1	54317392	54356407
ENSG00000059378	ENSG00000059378	ENST00000488726_PARP12	Q9H0J9	7_139715342_A_G	rs2286200	0.0029988387097952514	7.551180747141851e-05	12.0	2.343875580794953e-08	-0.6123050483008571	2.62385030048852e-05	-0.4599504812401861	0.0004289759430161212	-0.7575316846338653	0.4352923648139749	-0.09112645605070717	False	139715342								0.28465346534653463	7	-1	139723544	139763521
ENSG00000059573	ENSG00000059573	ENST00000371221_ALDH18A1	P54886	10_97379874_T_G		2.068558058315272e-05	8.481525983635658e-07	5.0	1.903727182700025e-09	-0.5299355745908718	0.018521891677051167	-0.1546893406177302	3.2156327961843885	-0.15522258339450629	0.465111961046137	0.06140211328498424	False	97379874					10_97379874_T_G;			0.2945544554455445	10	-1	97365696	97416463
ENSG00000059769	ENSG00000059769	ENST00000447096_DNAJC25	Q9H1X3	9_114394196_C_G	rs10980987	0.08138530184748824	0.008868911098764745	4.0	1.770636427926049e-05	-0.6261174152049858	2.8984472940957605e-05	-0.5012752346431799	1.0536942720515343	-0.2454389641749705	0.5674466211666095	-0.08564817146537558	False	114394196,114393784,114394146,114394177,114394573	9_114393784_G_A;	9_114394573_CTTA_C;9_114394571_GACT_G;			9_114394573_CTTA_C;9_114394571_GACT_G;9_114394177_C_T;9_114394146_G_T;9_114394196_C_G;	9_114394573_CTTA_C;9_114394571_GACT_G;9_114394177_C_T;9_114394146_G_T;9_114393784_G_A;9_114394196_C_G;		0.14356435643564355	9	1	114393632	114432508
ENSG00000060491	ENSG00000060491	ENST00000370461_OGFR	Q9NZT2-2	20_61442043_C_T	rs6010749	8.939511414819903e-07	4.946049493594324e-08	3.0	1.2613681227971785e-12	-0.6667687786780971	0.004123058293273034	-0.1994292183713984	0.7495681115992683	-0.3564180238721466	0.4903822528533362	-0.06323978047903678	False	61442043,61422554,61425374,61429144,61435594,61438026,61441527,61443314,61443636,61443660,61443870		20_61441527_CAA_C;		20_61438026_C_A;	20_61443314_C_T;20_61441527_CAA_C;20_61438026_C_A;20_61442043_C_T;		20_61443870_C_G;20_61443660_G_A;20_61443636_G_A;	0.2896039603960396	20	1	61436187	61445352
ENSG00000060688	ENSG00000060688	ENST00000373720_SNRNP40	Q96DI7	1_31857847_G_A	rs4494186	0.06592577161946271	0.003493188326518152	8.0	1.986291594222352e-05	0.2519873507329828	0.7877745198604426	0.011755526015922215	0.2190723543309258	0.19225567960860834	0.8457890184093713	-0.011708881333031051	True	31857847,31709055,31709214,31709555,31710020,31710068,31710270,31710349,31710888,31712863,31714807,31714925,31715204,31717675,31719340,31719450,31721708,31722562,31723845,31725392,31725542,31725692,31725953,31726185,31727175,31727214,31728543,31728920,31731061,31731208,31731758,31733782,31734033,31734841,31735512,31735851,31736123,31736248,31736800,31737977,31738416,31738696,31738857,31740668,317…		1_31764713_C_CAAG;1_31761608_CAG_C;1_31753405_G_GTATT;1_31751896_CA_C;1_31743527_ATATT_A;1_31737977_GT_G;1_31734033_CA_C;			1_31769025_T_C;1_31768197_C_A;1_31766956_A_G;1_31766491_T_C;1_31765968_C_T;1_31764713_C_CAAG;1_31764693_G_A;1_31764160_A_G;1_31764048_A_T;1_31763787_T_C;1_31763697_A_C;1_31763496_G_A;1_31762981_T_C;1_31761936_T_A;1_31761860_A_G;1_31761725_C_T;1_31761609_A_G;1_31761608_CAG_C;1_31760764_A_T;1_31760128_G_A;1_31757178_A_T;1_31757145_G_A;1_31754511_G_C;1_31753405_G_GTATT;1_31753353_G_A;1_31752316_G_A;…			0.4084158415841584	1	-1	31732417	31769662
ENSG00000061676	ENSG00000061676	ENST00000361354_NCKAP1	Q9Y2A7	2_183790883_C_G	rs6730114	0.003875848349327857	0.00014975490269985897	8.0	6.777699997053449e-08	0.3353470623550673	0.046407828232003186	0.1168227912281869	1.3060855850471047	0.7590056324080772	0.9468438383334944	-0.0068821477676839216	True	183790883,183776278,183776596,183780408,183786763,183793398,183797662,183799558,183803954,183805860,183809234,183812553,183813412,183816407,183816436,183840142,183843926,183848114,183848788,183860298,183871448,183873156,183876214,183876387,183883905,183884734,183891125,183897368,183905823,183906786,183908396,183909532,183912127,183912183,183916217,183917553,183918138,183921692,183923226		2_183848788_AACTG_A;2_183805859_CA_C;2_183776596_G_GCAGTAACT;	2_183848114_T_C;2_183799558_G_C;	2_183786763_C_T;2_183780408_T_C;2_183776596_G_GCAGTAACT;2_183776596_G_T;2_183776278_A_T;	2_183897368_C_A;2_183891125_A_C;2_183884734_G_T;2_183883905_C_T;2_183876387_G_A;2_183876214_T_G;2_183873156_A_C;2_183871448_C_A;2_183860298_G_A;2_183848788_AACTG_A;2_183848114_T_C;2_183843926_A_G;2_183840142_T_C;2_183816436_G_A;2_183816407_G_A;2_183813412_C_T;2_183812553_C_A;2_183809234_A_C;2_183805860_A_T;2_183805859_CA_C;2_183803954_G_A;2_183797662_A_G;2_183793398_A_G;2_183790883_C_G;		2_183799558_G_C;	0.1608910891089109	2	-1	183773843	183903586
ENSG00000061794	ENSG00000061794	ENST00000542791_MRPS35	P82673	12_27864717_A_G	rs7311141	5.317083016202955e-05	2.315201285107427e-06	5.0	1.0962573273945912e-10	-0.6311663991141568	1.3236695105293129e-06	0.2052651925418501	0.08871799788405305	-0.13989597740848575	0.308936702140061	0.07511644797586747	True	27864717					12_27864717_A_G;	12_27864717_A_G;		0.5	12	1	27863706	27909228
ENSG00000061936	ENSG00000061936	ENST00000541286_SFSWAP	Q12872	12_132235894_C_T	rs76496457	3.833427157206845e-08	4.844967921792189e-10	11.0	5.485694752217562e-17	1.3141961959816115	0.11025120518544082	-0.11206246342582178	0.3966002451791269	0.38123448019069706	0.4069596059358178	0.0896255313902643	False	132235894,132219427,132227206,132242145,132243321,132246093,132246747,132253225,132253365,132254265,132254780,132257164,132257356,132257854,132258749,132261101,132267561,132269780,132278493,132278566,132282861,132282951,132283801,132288182,132290007,132290024,132291213		12_132269780_AACTG_A;	12_132269780_AACTG_A;		12_132283801_G_C;12_132282951_G_A;12_132282861_A_G;12_132278566_T_G;12_132278493_G_C;12_132269780_AACTG_A;12_132267561_A_T;12_132261101_G_A;12_132258749_G_T;12_132257854_G_C;12_132257356_G_A;12_132257164_G_A;12_132254780_G_A;12_132254265_G_A;12_132253365_C_T;12_132253225_C_T;12_132246747_C_T;12_132246093_G_T;12_132243321_T_G;12_132242145_G_C;12_132227206_G_A;12_132219427_A_G;12_132235894_C_T;	12_132269780_AACTG_A;12_132267561_A_T;12_132261101_G_A;12_132258749_G_T;12_132257854_G_C;12_132257356_G_A;12_132257164_G_A;12_132254780_G_A;12_132254265_G_A;12_132253365_C_T;12_132253225_C_T;12_132246747_C_T;12_132246093_G_T;12_132243321_T_G;12_132242145_G_C;12_132227206_G_A;12_132219427_A_G;12_132235894_C_T;		0.099009900990099	12	1	132195626	132284282
ENSG00000062038	ENSG00000062038	ENST00000429102_CDH3	P22223	16_68739125_G_A	rs34592833	1.3529488666875223e-06	2.099109092580992e-08	11.0	1.2668954086927631e-14	-0.8324679490052728	0.0451165191964068	-0.13229201175562805	1.098902051601132	-0.17497026993413378	0.7852583754429373	-0.02277067491129125	False	68739125,68702077,68705987,68706933,68710737,68713385,68719430,68719607,68722096,68722377,68731227,68731365,68732049,68732977,68733646,68733665,68734591,68734855,68735835,68736292,68737512,68738206,68739851,68740097,68741769,68742544,68743939,68744532,68745275,68746199,68747001,68748027,68748223,68749055,68749529,68750190,68750331,68750518,68751904,68752878,68754312,68754730,68755165,68755635,687…	16_68732049_A_C;	16_68749055_GC_G;16_68745275_AAG_A;16_68742544_CT_C;			16_68755635_T_A;16_68755165_C_T;16_68754730_C_T;16_68754312_T_C;16_68752878_C_A;16_68751904_A_G;16_68750518_C_T;16_68750331_C_T;16_68750190_G_A;16_68749529_G_A;16_68749055_GC_G;16_68749055_G_A;16_68748223_A_G;16_68748027_G_A;16_68747001_G_A;16_68745275_AAG_A;16_68744532_A_G;16_68743939_A_C;16_68742544_CT_C;16_68741769_C_T;16_68740097_T_C;16_68739851_C_G;16_68738206_G_A;16_68737512_C_T;16_68736292…	16_68732049_A_C;16_68731365_T_C;16_68722377_G_A;16_68722096_C_T;16_68719607_C_T;16_68719430_C_T;16_68713385_C_G;16_68710737_T_G;16_68706933_A_G;16_68705987_C_T;16_68702077_G_A;		0.2549504950495049	16	1	68670092	68756519
ENSG00000062194	ENSG00000062194	ENST00000511209_GPBP1	D4PHA4	5_56400003_C_T	rs172980	0.07932428473391816	0.00312981555856545	11.0	4.539911439017309e-06	0.4155672963731697	0.8678496583673584	-0.010457639417880532	0.9358521603678988	0.15752317324033915	0.3964471497726764	0.10329430157122266	False	56400003,56407567,56410784,56412370,56416688,56420039,56421193,56428943,56430676,56438194,56440008,56442461,56442577,56443518,56444416								0.2103960396039604	5	1	56469775	56560506
ENSG00000062485	ENSG00000062485	ENST00000549143_CS	B4DJV2	12_56647911_G_C	rs808919	1.7773183112531175e-16	2.8189682588326358e-19	33.0	8.077647669879556e-23	-1.3933796449137228	0.6249181235944621	0.04649896843054069	0.21154116737440445	-0.3396945395947022	0.19663397543173305	-0.17627774744997815	False	56647911,56623347,56625693,56627300,56627619,56627652,56628378,56630067,56630764,56634639,56635080,56636975,56638077,56638267,56640341,56640886,56643684,56644251,56644886,56646213,56647243,56648777,56649601,56653294,56653560,56653641,56653914,56656265,56657216,56657888,56658708,56659320,56660905,56664231,56667100,56667298,56667604,56667894,56671210,56671289,56672106,56673561,56674766,56676817,566…		12_56684657_CA_C;12_56684496_TAGGAA_T;12_56682601_TA_T;12_56676817_CT_C;12_56671289_TA_T;		12_56679751_A_G;	12_56693520_C_A;12_56690662_G_A;12_56689725_G_C;12_56689535_G_A;12_56688237_G_A;12_56687572_G_T;12_56687459_T_C;12_56686997_C_T;12_56684798_C_T;12_56684657_CA_C;12_56684496_TAGGAA_T;12_56683975_C_T;12_56682601_TA_T;12_56682371_C_T;12_56680636_A_G;12_56680531_T_C;12_56679971_A_G;12_56679751_A_G;12_56678335_T_C;12_56677979_T_A;12_56677261_G_A;12_56676817_CT_C;12_56674766_G_A;12_56672106_T_A;12_5667…	12_56693520_C_A;12_56690662_G_A;12_56689725_G_C;12_56689535_G_A;12_56688237_G_A;12_56687572_G_T;12_56687459_T_C;12_56686997_C_T;12_56684798_C_T;12_56684657_CA_C;12_56684496_TAGGAA_T;12_56683975_C_T;12_56682601_TA_T;12_56682371_C_T;12_56680636_A_G;12_56680531_T_C;12_56679971_A_G;12_56679751_A_G;12_56678335_T_C;12_56677979_T_A;12_56677261_G_A;12_56676817_CT_C;12_56674766_G_A;12_56672106_T_A;12_5667…	12_56679751_A_G;	0.0594059405940594	12	-1	56665483	56694176
ENSG00000062598	ENSG00000062598	ENST00000290246_ELMO2	Q5JVZ5	20_45110682_T_C	rs466497	0.02867497994127682	0.0005797551318464393	19.0	2.6452535073055747e-07	0.4891864445888265	2.045546678553032e-05	0.3555360822961284	0.13702625108393884	0.3652104595168263	0.017185724007857294	0.2539921439597681	False	45110682,45110957,45111629,45111737,45111930,45114285,45114330,45114547,45115210,45115351,45115684,45115947,45116077,45116226,45119670								0.2301980198019802	20	-1	44994688	45061704
ENSG00000063241	ENSG00000063241	ENST00000438389_ISOC2	Q96AB3	19_55957337_G_C	rs148052470	0.005888496701872958	0.00023721596334879888	8.0	4.066017287561861e-07	0.613887794566745	0.9347105416133537	0.006014225168768151	0.004207805612445551	-0.011143753310908444	0.0006766124430572546	-0.43397602501945176	False	55957337								0.1707920792079208	19	-1	55964352	55973710
ENSG00000063761	ENSG00000063761	ENST00000238561_ADCK1	Q86TW2-2	14_78356172_C_G	rs61990741	1.8127265952929002e-13	1.6843731007779238e-15	8.0	5.64075077271367e-25	1.4440621931215192	1.1568978743949143e-24	1.4472009513645685	0.0054129814588972465	0.7353725803226894	0.14648168115947854	0.3055646599355513	False	78356172,78136458,78137126,78138187,78141494,78142964,78144575,78146606,78152719,78153052,78153269,78154069,78154856,78155278,78156189,78156487,78157096,78157186,78158945,78160082,78180357,78183451,78185723,78187032,78187451,78192623,78193545,78195691,78203713,78205855,78206148,78210958,78210987,78215605,78216519,78217597,78219143,78224364,78224638,78226339,78228167,78230685,78231533,78234198,782…		14_78355660_ATATAAT_A;			14_78370882_C_T;14_78370713_A_G;14_78368867_T_G;14_78368295_C_A;14_78364382_C_G;14_78362176_T_C;14_78361654_C_G;14_78359223_A_T;14_78358958_G_A;14_78358359_G_C;14_78355660_ATATAAT_A;14_78347589_C_T;14_78342185_G_C;14_78339266_G_T;14_78312433_C_A;14_78309929_G_A;14_78282680_A_C;14_78275824_C_T;14_78273784_A_G;14_78273568_C_T;14_78271094_C_T;14_78268930_A_C;14_78268840_C_T;14_78356172_C_G;	14_78370882_C_T;14_78370713_A_G;14_78368867_T_G;14_78368295_C_A;14_78364382_C_G;14_78362176_T_C;14_78361654_C_G;14_78359223_A_T;14_78358958_G_A;14_78358359_G_C;14_78355660_ATATAAT_A;14_78347589_C_T;14_78342185_G_C;14_78339266_G_T;14_78312433_C_A;14_78309929_G_A;14_78282680_A_C;14_78275824_C_T;14_78273784_A_G;14_78273568_C_T;14_78271094_C_T;14_78268930_A_C;14_78268840_C_T;14_78356172_C_G;		0.10148514851485148	14	1	78266426	78401355
ENSG00000063978	ENSG00000063978	ENST00000314289_RNF4	H0YAI5	4_2467751_C_T	rs35400491	0.0462585106852257	0.0008907526505573252	21.0	2.9701099578838374e-07	0.34313965182878536	6.62990084484906e-07	0.4392376175646817	0.032254164736281704	0.34265084263662593	0.05271855510868674	0.3154255783600606	False	2467751,2470892,2481490				4_2470892_C_G;	4_2481490_G_A;			0.15594059405940594	4	1	2463947	2627047
ENSG00000064199	ENSG00000064199	ENST00000227135_SPA17	Q15506	11_124597824_T_C	rs61247811	2.958472876332895e-05	1.548483215676474e-06	4.0	1.9643457457833632e-08	-1.038617420412036	2.2244976508480505e-07	-0.9611012702226136			0.000306414835963504	-1.0694414100530878	False	124597824,124596741,124597044,124597887								0.06435643564356436	11	1	124543694	124567414
ENSG00000064225	ENSG00000064225	ENST00000483910_ST3GAL6	A0A087WXB8	3_98462045_C_A	rs828593	0.027803283114504068	0.0003946047395691397	27.0	2.68928935664245e-06	0.39831453095778224	1.1290325890397407e-13	0.4862841103524285			0.8414210240981218	-0.0277008811000804	False	98462045,98440021,98443648,98445324,98447441,98448323,98453951,98462340,98463298,98465313,98465726,98466035,98469286,98469789,98469888,98473318,98474653,98475079,98475083,98478399,98479690,98480330		3_98469888_CT_C;3_98469286_GA_G;3_98453950_TC_T;			3_98480330_A_G;3_98479690_T_A;3_98478399_T_G;3_98475083_A_G;3_98475079_G_T;3_98473318_G_A;3_98469888_CT_C;3_98469789_C_T;3_98469286_GA_G;3_98466035_T_G;3_98465726_T_G;3_98465313_C_G;3_98463298_A_C;3_98462340_G_T;3_98453951_C_T;3_98453950_TC_T;3_98462045_C_A;	3_98480330_A_G;3_98479690_T_A;3_98478399_T_G;3_98475083_A_G;3_98475079_G_T;3_98473318_G_A;3_98469888_CT_C;3_98469789_C_T;3_98469286_GA_G;3_98466035_T_G;3_98465726_T_G;3_98465313_C_G;3_98463298_A_C;3_98462340_G_T;3_98453951_C_T;3_98453950_TC_T;3_98462045_C_A;		0.4257425742574257	3	1	98451080	98540045
ENSG00000064309	ENSG00000064309	ENST00000534661_CDON	Q4KMG0	11_125869402_G_T	rs636865	0.05090546065852793	0.002318481016165737	9.0	6.158173102439889e-06	0.21141560992219136	0.06434522099430047	0.11399527103378684			0.8531971428114502	0.02240612032222033	False	125869402					11_125869402_G_C;			0.349009900990099	11	-1	125825691	125933230
ENSG00000064601	ENSG00000064601	ENST00000484855_CTSA	X6R5C5	20_44526783_G_A	rs7270170	0.0002658594286263393	3.444661838792904e-06	19.0	6.314224010975835e-10	0.4174576404233951	0.7864022357500872	-0.017798869674897667	1.2592548173935472	0.0025481522268777645	0.5259862547249594	-0.052843682343520326	False	44526783					20_44526783_G_A;	20_44526783_G_A;		0.4801980198019802	20	1	44518783	44527459
ENSG00000064666	ENSG00000064666	ENST00000263097_CNN2	B4DUT8	19_1036444_G_A	rs930231	3.843796468645011e-11	3.07054626553133e-13	12.0	1.6236063607233546e-14	-0.6377698239341678	2.9657271009431976e-07	-0.3978422256589311	0.00020335354394978235	-0.3008004289276389	0.0001523739833407301	-0.24738980857984585	False	1036444,1037986,1039146				19_1037986_A_G;	19_1036444_G_A;	19_1036444_G_A;	19_1036444_G_A;	0.3193069306930693	19	1	1026298	1039068
ENSG00000064763	ENSG00000064763	ENST00000536681_FAR2	Q96K12	12_29374853_C_T	rs10082744	0.000469902858644531	1.2093006994992165e-05	10.0	1.0287347228460046e-09	-0.4687935677349806	3.885339123777104e-09	-0.5079977466815947	2.2072113528394626	-0.10449062616358183	0.1508757230037221	-0.1141601181485942	False	29374853,29372608,29372629,29380018,29380138,29380188,29380227,29381291,29381523,29381900,29381972,29382030,29382674,29384698,29386024,29386296,29388110		12_29381291_A_ACT;			12_29388110_G_A;12_29386296_T_C;12_29386024_A_T;12_29384698_A_T;12_29382674_A_G;12_29382030_G_A;12_29381972_C_G;12_29381900_C_A;12_29381291_A_ACT;12_29381291_A_T;12_29380227_A_G;12_29380188_C_T;12_29380138_A_G;12_29380018_G_T;12_29372629_G_T;12_29372608_C_T;12_29374853_C_T;			0.4702970297029703	12	1	29302036	29493913
ENSG00000064933	ENSG00000064933	ENST00000374826_PMS1	P54277-3	2_190572291_A_G	rs6434363	0.0006632087461989651	9.249893555610867e-06	19.0	1.0883569512034125e-08	0.7194555528814907	0.0010301632154897818	0.2957166064237959	0.08635151256684685	0.3620564572311509	0.04133100712961072	0.2111975966304005	True	190572291,190551434,190551706,190555875,190569191,190572421,190576636,190576778,190579929,190583187,190585831,190586223,190590356,190593168,190595904,190603665,190603780,190604008,190605421,190607210,190610537,190612327,190612980,190625422,190634271,190636014,190639915,190640989,190641184,190642946,190649316,190655561,190657600,190661604,190664352,190665905,190670539,190670808,190671255,190672624…		2_190670808_CAT_C;2_190661604_T_TG;		2_190671255_C_T;2_190670808_CAT_C;2_190649316_G_C;	2_190694449_C_T;2_190694266_G_T;2_190689284_G_A;2_190682632_G_C;2_190678803_A_C;2_190676873_G_A;2_190673835_C_T;2_190672624_A_C;2_190671255_C_T;2_190670808_CAT_C;2_190665905_G_A;2_190664352_A_G;2_190661604_T_TG;2_190657600_C_T;2_190655561_G_C;2_190649316_G_C;	2_190694449_C_T;2_190694266_G_T;2_190689284_G_A;2_190682632_G_C;2_190678803_A_C;2_190676873_G_A;2_190673835_C_T;2_190672624_A_C;2_190671255_C_T;2_190670808_CAT_C;2_190665905_G_A;2_190664352_A_G;2_190661604_T_TG;2_190657600_C_T;2_190655561_G_C;2_190649316_G_C;		0.1905940594059406	2	1	190649107	190742355
ENSG00000064999	ENSG00000064999	ENST00000360359_ANKS1A	Q92625	6_35047579_G_C		0.023083444418610426	0.0043039583984701	2.0	0.00010830046571800275	-0.15411769788667118	2.5831427691378038e-05	-0.16601411101626298	0.35154144066768794	-0.3301101631501844	0.018672046676304704	-0.1866617413521772	False	35047579,35017003,35023130,35038086,35045281,35047732,35047938,35048018,35049054,35052635,35053383,35054983,35061714,35062058,35064681,35066091,35066624,35068696,35069669,35071114,35072444,35073286,35075148,35078623,35079956,35080229,35081931,35091228,35092135,35099307,35100159,35104018		6_35054983_GGCAGCGTAGACGCT_G;6_35053383_CTAGGAAGAG_C;6_35048018_G_GC;			6_35054983_GGCAGCGTAGACGCT_G;6_35053383_CTAGGAAGAG_C;6_35052635_A_G;6_35049054_A_G;6_35048018_G_GC;6_35047938_A_G;6_35047732_T_C;6_35045281_G_A;6_35038086_C_T;6_35023130_G_A;6_35017003_G_A;6_35047579_G_C;			0.4752475247524752	6	1	34857042	35059179
ENSG00000065000	ENSG00000065000	ENST00000585652_AP3D1	O14617-5	19_2111035_C_T	rs79288884	3.943402383758287e-05	6.003163221569728e-07	14.0	1.0410665052709864e-11	-0.5542670804167217	7.065597158873187e-20	-0.7031256804761946	0.10047172089822584	-0.5959168041570786	0.002105124534054597	-0.3496160810410103	True	2111035,2100360,2100384,2102510,2102543,2102824,2103114,2103472,2103941,2103962,2104502,2105626,2105913,2106569,2107696,2107801,2108929,2109071,2109596,2109667,2109812,2109988,2110108,2111038,2111382,2111397,2111661,2112442,2113301,2113750,2114175,2114465,2115439,2116760,2116764,2117075,2118692,2121316,2121548,2122094,2122662,2123328,2123516,2123928,2124223,2124369,2124873,2125156,2125324,2125897…	19_2118692_C_T;	19_2112442_ATGAAATGTCCAGGACACAC_A;19_2108765_ACTGCAACAGAGCGGGCAGTGTTAGGCTTCCCGGACATTGCATGGCTGCAGCCCCACCCCCAGAGCAGGGGCCACCTTCTTGGGCTGCCCTTGGCCACAGCTTCAGGAGGCCTGTAGGAGCAGGGTGTGGCCCTGAGAGGCCTGGGGTGTGGGGAATGCAGCCCCCGCACCAGCTCCCAGGCCTCGGGGCCACCAGCCACCCGGGATCCCAAAGGGTGTGAGTTTGGGTGGGAGGGCCACAGGCCCGGCTCCAATAGGAAGGGACAGCTGCCGCGTGCGTGAAAGCCCCGTGCAATCCATCAGCCCCTCACTCTCCTTAC_A;19_2108765_ACTGCAACAGAGCGGGCAGT…	19_2121316_C_T;19_2108765_ACTGCAACAGAGCGGGCAGTGTTAGGCTTCCCGGACATTGCATGGCTGCAGCCCCACCCCCAGAGCAGGGGCCACCTTCTTGGGCTGCCCTTGGCCACAGCTTCAGGAGGCCTGTAGGAGCAGGGTGTGGCCCTGAGAGGCCTGGGGTGTGGGGAATGCAGCCCCCGCACCAGCTCCCAGGCCTCGGGGCCACCAGCCACCCGGGATCCCAAAGGGTGTGAGTTTGGGTGGGAGGGCCACAGGCCCGGCTCCAATAGGAAGGGACAGCTGCCGCGTGCGTGAAAGCCCCGTGCAATCCATCAGCCCCTCACTCTCCTTAC_A;19_2108765_ACTGCAACAGAGCGGGCAGTGTTAGGCTTCCCGGACATT…	19_2151515_G_A;	19_2151515_G_A;19_2136680_G_C;19_2126639_G_A;19_2126608_C_T;19_2126585_G_A;19_2125897_T_C;19_2125324_C_T;19_2125156_A_G;19_2124873_G_C;19_2124369_C_T;19_2124223_G_A;19_2123928_C_T;19_2123516_A_G;19_2123328_A_G;19_2122662_G_A;19_2122094_C_G;19_2121548_C_T;19_2121316_C_T;19_2117075_G_A;19_2116764_C_T;19_2116760_A_G;19_2115439_C_G;19_2114465_C_A;19_2113750_T_C;19_2113301_C_T;19_2112442_ATGAAATGTCCAG…			0.18811881188118806	19	-1	2100988	2164464
ENSG00000065029	ENSG00000065029	ENST00000373953_ZNF76	P36508-2	6_35200350_G_T		3.464048780557468e-10	3.0965385476636987e-12	12.0	1.8978910370855088e-15	-0.918551744345507	9.188250065323929e-31	-1.0384231255002108	0.09210909010898452	-0.2554491427920422	0.2283639150640164	-0.16598092010162446	False	35200350,35158796,35159411,35159695,35159805,35160470,35163602,35163735,35164004,35166157,35169049,35174642,35174858,35178029,35179624,35188925,35190120,35193773,35197035,35201858,35205541,35205881,35215954,35223137,35224600,35227832,35228215,35230035,35233443,35235871,35238623,35239994,35241239,35241640,35244531,35245737,35246903,35247166,35249908,35250440,35253702,35256719,35256934,35258539,352…		6_35247166_T_TC;6_35241640_GA_G;6_35230035_TGAG_T;		6_35263555_A_G;6_35258539_C_A;	6_35258539_C_A;6_35256934_C_A;6_35256719_T_C;6_35250440_C_A;6_35249908_C_T;6_35247166_T_TC;6_35247166_T_C;6_35246903_G_A;6_35245737_T_C;6_35244531_G_A;6_35241640_GA_G;6_35241239_T_C;6_35239994_T_C;6_35238623_T_C;6_35235871_G_A;6_35233443_A_G;6_35230035_TGAG_T;6_35228215_G_T;6_35227832_T_C;	6_35263555_A_G;6_35258539_C_A;6_35256934_C_A;6_35256719_T_C;6_35250440_C_A;6_35249908_C_T;6_35247166_T_TC;6_35247166_T_C;6_35246903_G_A;6_35245737_T_C;6_35244531_G_A;6_35241640_GA_G;6_35241239_T_C;6_35239994_T_C;6_35238623_T_C;6_35235871_G_A;6_35233443_A_G;6_35230035_TGAG_T;6_35228215_G_T;6_35227832_T_C;		0.14356435643564355	6	1	35226686	35263762
ENSG00000065054	ENSG00000065054	ENST00000432365_SLC9A3R2	Q15599	16_2087785_T_C	rs34165865	2.180243292595805e-11	2.2367168309256736e-13	9.0	2.891126655509247e-20	-1.2453226757319376	0.061573119977501936	-0.1839259319504001	0.008661891008560001	-0.3796846396771921	0.0005056640038418642	-0.4234590925551345	True	2087785,2087460,2088312,2089028	16_2087785_T_C;			16_2088312_C_T;	16_2087460_G_T;16_2087785_T_C;			0.16831683168316833	16	1	2075357	2089027
ENSG00000065060	ENSG00000065060	ENST00000192788_UHRF1BP1	Q6BDS2	6_34791334_C_T		0.004021053938210777	0.000622880267775064	2.0	4.0309636164216436e-07	0.27015112720016315	4.235048323617613e-07	0.30212913383813217	0.0155158255091509	-0.020992061975766974	0.04111697524277138	-0.2126402408518861	False	34791334,34713399,34714209,34715395,34716028,34716330,34716605,34716985,34720411,34721128,34722659,34722902,34726838,34727031,34729848,34731225,34732145,34733362,34734239,34737553,34739649,34739726,34741917,34742990,34743617,34744134,34747603,34749008,34749113,34750728,34751265,34752010,34752351,34752678,34752963,34753339,34756761,34756909,34757256,34757810,34758824,34760162,34760325,34760583,347…		6_34820555_TA_T;6_34784292_AT_A;6_34784165_TGAGCC_T;6_34762004_TGA_T;6_34791333_TC_T;6_34791332_TTC_T;	6_34791027_A_G;		6_34827693_A_T;6_34820555_TA_T;6_34819366_G_A;6_34813077_C_G;6_34812054_T_C;6_34811199_C_G;6_34810739_A_G;6_34810172_T_C;6_34803558_C_G;6_34802301_C_T;6_34801631_A_G;6_34801160_T_C;6_34800896_A_G;6_34800329_T_C;6_34799308_T_G;6_34799130_T_C;6_34798265_T_G;6_34795685_A_T;6_34794961_G_A;6_34794434_T_C;6_34793768_G_A;6_34791027_A_G;6_34787976_A_C;6_34786408_A_G;6_34786305_C_T;6_34784667_C_G;6_347843…			0.2920792079207921	6	1	34759857	34850915
ENSG00000065154	ENSG00000065154	ENST00000490096_OAT	P04181	10_126070808_A_G		1.0796856486123035e-12	1.0804549043926669e-14	8.0	3.1646782903955395e-21	-1.0402276788705518	0.06262389972773955	-0.09389258171582353	1.8156716810758933	-0.20167034688839905	1.1005846293404409	-0.04930499512874365	False	126070808								0.2227722772277228	10	-1	126085872	126107545
ENSG00000065268	ENSG00000065268	ENST00000251289_WDR18	U3KQC1	19_984218_C_T	rs8112598	1.1081828347759883e-06	1.700393883688911e-08	11.0	1.4865460057992942e-13	-0.7104705050407282	2.428267641498866e-16	-0.7258801292429282	0.018643414412152986	-0.3693644335540731	8.483963475667094e-06	-0.4927851999395201	False	984218,984987,985251,985997,986624,986825,987051,987365,987533,987571,988096,988668,990185					19_990185_G_C;19_988668_T_C;19_988096_C_T;19_987571_C_G;19_987533_T_C;19_987365_A_G;19_987051_A_G;19_986825_T_C;19_986624_A_G;19_985997_C_G;19_985251_T_C;19_984987_T_C;19_984218_C_T;	19_990185_G_C;19_988668_T_C;19_988096_C_T;19_987571_C_G;19_987533_T_C;19_987365_A_G;19_987051_A_G;19_986825_T_C;19_986624_A_G;19_985997_C_G;19_985251_T_C;19_984987_T_C;		0.2995049504950495	19	1	983174	994569
ENSG00000065361	ENSG00000065361	ENST00000411731_ERBB3	P21860-4	12_56485269_G_A	rs798829	0.07225021444133929	0.0014070118400527829	22.0	6.931557946820743e-06	0.3676344257336477	0.0029241684132263104	0.20563237380004945	1.0939735398748414	0.21816241288757066	0.9758602237935085	0.0026924315138134873	True	56485269,56486159,56488913					12_56488913_G_A;12_56486159_G_A;12_56485269_G_A;	12_56488913_G_A;12_56486159_G_A;12_56485269_G_A;		0.4702970297029703	12	1	56473641	56497289
ENSG00000065427	ENSG00000065427	ENST00000566772_KARS	Q15046	16_75613074_C_T	rs11645180	3.8117088893612365e-19	1.2217015671029608e-21	12.0	4.529054549496308e-26	1.3846146612812011	0.7603494489818313	0.0170237378619902	1.3874845988287128	0.31891146948783433	0.01269158932499322	-0.260033309249319	True	75613074,75555314,75555780,75557142,75558054,75560152,75560416,75560602,75561030,75561093,75561195,75563330,75563746,75564287,75565132,75565845,75568433,75574729,75575410,75579111,75581160,75581548,75606360,75609434,75609657,75615943,75634014,75636185,75639207,75657063,75672885,75679103,75679181					16_75679181_A_T;16_75672885_G_A;	16_75679181_A_T;16_75672885_G_A;		0.150990099009901	16	-1	75661622	75682541
ENSG00000065457	ENSG00000065457	ENST00000564657_ADAT1	Q9BUB4	16_75634014_A_G	rs7206481	2.2650203772624528e-06	4.025459644840704e-08	10.0	9.974079562067476e-13	0.5088587092368384	1.2883199730733804e-21	0.8372564606149836	1.1976226599301434	0.30559934758292984	0.6874009614345833	-0.061616312730240035	False	75634014,75555314,75555780,75557142,75558054,75560152,75560416,75560602,75561030,75561093,75561195,75563330,75563746,75564287,75565132,75565845,75568433,75574729,75575410,75579111,75581160,75581548,75606360,75609434,75609657,75613074,75615943,75636185,75639207,75657063,75672885,75679103,75679181				16_75634014_A_G;	16_75657063_A_T;16_75639207_G_C;16_75636185_C_T;16_75634014_A_G;	16_75657063_A_T;16_75639207_G_C;16_75636185_C_T;16_75634014_A_G;		0.16831683168316833	16	-1	75630879	75657198
ENSG00000065485	ENSG00000065485	ENST00000316218_PDIA5	Q14554	3_122822271_G_C	rs12492011	0.046285756307619434	0.0023409639158170265	8.0	3.577421323343907e-05	0.4094999773996796	8.15951832441534e-06	0.33445437353632795	0.0013219822003699448	0.5097727866166757	0.016000853268299232	0.27953558605527906	False	122822271,122817549,122818775,122826054		3_122817549_GAAC_G;			3_122826054_T_C;3_122818775_G_A;3_122817549_GAAC_G;3_122822271_G_C;	3_122826054_T_C;3_122818775_G_A;3_122817549_GAAC_G;3_122822271_G_C;		0.16831683168316833	3	1	122785909	122944074
ENSG00000065534	ENSG00000065534	ENST00000360304_MYLK	Q15746-6	3_123543783_C_T	rs3851983	1.6303999592014468e-14	5.195962724656514e-17	21.0	2.6114766619404063e-21	0.6711073987068541	4.404397959380533e-26	0.8765335003898947	0.00020723175339904069	0.8205067558543697	1.0107686335187158e-09	0.6238058204869837	True	123543783,123556171,123559835,123561003,123568102,123568826,123571754,123584488,123594419,123599681,123600144,123604942,123605216,123606952,123607884,123610343,123610607,123620718,123624252,123624772,123625634,123626813,123635213,123645893,123650432,123652895,123653909,123654633,123664105,123665902,123666192,123670721,123672787,123674337,123676696,123678162					3_123600144_A_G;3_123599681_C_T;3_123594419_T_G;3_123584488_A_G;3_123571754_G_A;3_123568826_C_T;3_123568102_T_C;3_123561003_C_T;3_123559835_T_G;3_123556171_C_A;3_123543783_C_T;	3_123600144_A_G;3_123599681_C_T;3_123594419_T_G;3_123584488_A_G;3_123571754_G_A;3_123568826_C_T;3_123568102_T_C;3_123561003_C_T;3_123559835_T_G;3_123556171_C_A;3_123543783_C_T;		0.3094059405940594	3	-1	123328896	123603178
ENSG00000065548	ENSG00000065548	ENST00000337859_ZC3H15	Q8WU90	2_187379427_C_G	rs7581557	0.0009410595086981457	2.566827806011527e-05	10.0	1.7650378104895184e-07	-0.2337877589632885	1.7617021272269086e-07	-0.216951760916436	0.1449238394847683	-0.32914790342812195	0.044066346090282205	-0.18800435466003385	False	187379427,187067712,187098102,187098370,187099929,187129322,187130573,187131068,187131751,187132414,187135338,187136708,187136749,187138410,187140763,187143517,187143925,187144097,187144882,187145199,187145664,187146636,187148555,187150638,187151057,187157166,187157175,187157415,187157459,187157687,187160262,187160368,187163267,187163416,187163579,187164011,187165208,187168868,187168900,187169224…		2_187353550_C_CTA;2_187351344_C_CGT;			2_187371029_G_C;2_187369832_T_C;2_187368194_T_C;2_187367534_T_C;2_187366717_A_G;2_187366679_T_C;2_187364811_G_A;2_187364063_G_A;2_187363779_G_A;2_187362423_T_C;2_187362158_C_A;2_187361056_T_C;2_187359344_A_G;2_187357416_T_G;2_187356546_G_T;2_187353550_C_CTA;2_187353550_C_A;2_187352583_T_C;2_187351344_C_CGT;	2_187369832_T_C;2_187368194_T_C;2_187367534_T_C;2_187366717_A_G;2_187366679_T_C;2_187364811_G_A;2_187364063_G_A;2_187363779_G_A;2_187362423_T_C;2_187362158_C_A;2_187361056_T_C;2_187359344_A_G;2_187357416_T_G;2_187356546_G_T;2_187353550_C_CTA;2_187353550_C_A;2_187352583_T_C;2_187351344_C_CGT;		0.4381188118811881	2	1	187350883	187374090
ENSG00000065600	ENSG00000065600	ENST00000261455_TMEM206	Q9H813	1_212450216_C_T	rs351417	0.011167991866941358	0.0007694906652145668	5.0	1.4176603479967029e-06	-0.35889554566596715	8.692253270774609e-10	-0.35376893977006385	0.0893679474047346	-0.23187267680449875	0.35077339955258524	-0.1142318512009573	False	212450216,212408780,212409008,212410155,212416989,212421771,212423789,212425196,212425771,212426631,212437442,212440088,212441128,212447665,212451017,212452912,212455024,212455845,212456714,212459015,212463792,212465827,212466239,212466604,212476519,212479689,212482852,212487311,212491633,212492965,212498198,212498652,212499895,212500433,212500693,212504204,212509762,212512128,212513248,212515613…				1_212588206_C_G;1_212537707_C_T;1_212537702_G_A;1_212537553_G_A;	1_212563114_T_C;1_212558397_T_A;1_212553111_G_C;1_212552316_C_T;1_212542410_T_C;			0.3688118811881188	1	-1	212537273	212588243
ENSG00000065675	ENSG00000065675	ENST00000263125_PRKCQ	A0A087X0I9	10_6682022_T_C		2.3431014813040805e-21	2.3976691234233712e-23	3.0	6.044818714364861e-30	1.0339566083442773	2.127352795213465e-32	1.052222849386589	3.735280507769765e-10	0.9040668992342268	1.330558337753051e-16	0.8055077988852407	False	6682022,6672988,6676280,6676809,6686635								0.2747524752475248	10	-1	6469105	6622263
ENSG00000065802	ENSG00000065802	ENST00000409297_ASB1	Q9Y576	2_239339281_G_C	rs1103770	0.06965469631598252	0.003298944293488077	9.0	3.808493200893918e-05	-0.2994868643249861	0.010732647499356164	0.1426919308618117	0.9535956847048366	-0.11905646361280198	0.8694036478032152	-0.01877014830878521	True	239339281,239329736,239332555,239338578,239339291,239339501,239339511,239345404		2_239345404_A_ACT;2_239338578_CA_C;			2_239345404_A_ACT;2_239345404_A_T;2_239339511_A_G;2_239339501_G_C;2_239339291_G_C;2_239338578_CA_C;2_239339281_G_C;			0.33910891089108913	2	1	239335383	239360891
ENSG00000065809	ENSG00000065809	ENST00000378467_FAM107B	Q9H098	10_14608872_C_T		0.02220501528427681	0.00029419387961911924	28.0	8.788342681698718e-08	-0.4574830320246941	0.4825816933246668	-0.053077005187995456	0.05761217878233357	-0.6543159297824852	0.188302552298264	-0.1476788572246308	False	14608872,14564438,14565548,14568318,14568372,14569998,14570250,14570330,14571571,14573542,14573709,14574238,14574480,14575604,14576118,14577098,14577113,14578423,14578804,14580136,14580332,14580439,14581213,14581353,14581365,14587707,14588174,14589240,14592342,14595392,14597010,14602474,14602724,14604034,14604264,14612905,14614721,14615919,14616693,14620925		10_14569998_CT_C;	10_14595392_A_G;	10_14569998_CT_C;	10_14620925_G_C;10_14616693_A_T;10_14615919_A_C;10_14615919_AAA_AC;10_14614721_C_T;10_14612905_T_C;10_14604264_C_T;10_14604034_C_T;10_14602724_G_C;10_14602474_G_T;10_14595392_A_G;10_14592342_G_A;10_14589240_T_C;10_14588174_G_A;10_14587707_T_G;10_14581365_C_G;10_14581353_C_T;10_14581213_G_C;10_14580439_T_G;10_14580332_T_C;10_14580136_C_G;10_14578804_T_C;10_14578423_C_A;10_14577113_G_A;10_14577098_…	10_14620925_G_C;10_14616693_A_T;10_14615919_A_C;10_14615919_AAA_AC;10_14614721_C_T;10_14612905_T_C;10_14604264_C_T;10_14604034_C_T;10_14602724_G_C;10_14602474_G_T;10_14595392_A_G;10_14592342_G_A;10_14589240_T_C;10_14588174_G_A;10_14587707_T_G;10_14581365_C_G;10_14581353_C_T;10_14581213_G_C;10_14580439_T_G;10_14580332_T_C;10_14580136_C_G;10_14578804_T_C;10_14578423_C_A;10_14577113_G_A;10_14577098_…		0.2103960396039604	10	-1	14560556	14816896
ENSG00000065882	ENSG00000065882	ENST00000421339_TBC1D1	Q86TI0	4_38062233_T_A	rs1364953	2.3071488734047488e-11	1.1894851284118425e-13	18.0	8.952299439014531e-15	-0.9014375178882036	0.933069055192308	0.004137639216061407	0.2772752703458519	-0.4108721253659389	0.7257263848183848	-0.04134398363981706	False	38062233			4_38062233_T_A;		4_38062233_T_A;	4_38062233_T_A;		0.19306930693069307	4	1	37892708	38140796
ENSG00000065883	ENSG00000065883	ENST00000181839_CDK13	Q14004	7_40134678_A_G	rs17538328	6.631996206537757e-05	2.9390529653264765e-06	5.0	5.955474637656849e-10	-0.395301283633218	0.018162168916044424	-0.1997588288015293	0.9707319571283192	-0.4901466889638311	0.4738337684944315	0.07608987177829549	False	40134678,40024705,40066062,40099747,40103878,40104835,40106308,40113951,40116380,40123256,40126558,40127304,40135164,40141330,40157040,40207962,40236833,40250212		7_40066062_CG_C;		7_40135164_C_T;7_40134678_A_G;	7_40127304_C_T;7_40126558_T_C;7_40123256_A_G;7_40116380_G_C;7_40113951_C_T;7_40106308_C_A;7_40104835_C_G;7_40103878_T_C;7_40099747_C_T;7_40066062_CG_C;7_40024705_G_A;			0.1707920792079208	7	1	39989636	40136733
ENSG00000066084	ENSG00000066084	ENST00000549620_DIP2B	Q9P265	12_51073523_G_A	rs11169520	1.306067661715017e-07	3.868123232414034e-09	5.0	4.627657558969772e-33	0.5392863394962905	3.592595888397018e-15	0.4333045247377886	2.90030155482392e-08	0.6920437069463028	1.26384012625385e-14	0.6455423125885305	False	51073523,50656518,50882355,50882437,50883918,50884796,50885635,50885840,50893417,50893518,50897146,50898728,50909254,50923885,50931056,50933112,50934931,50937037,50939276,50939807,50940983,50946955,50954191,50957170,50959002,50959088,50959199,50964106,50970535,50971086,50972319,50982084,50982864,50983942,50987294,51008201,51011256,51018116,51019171,51021260,51031817,51032415,51040397,51042890,510…		12_51121629_CA_C;12_51008201_AT_A;12_50970535_AT_A;12_50959088_AT_A;12_50931056_ATTGT_A;		12_51138862_C_T;12_51089734_T_A;	12_51121629_CA_C;12_51117593_C_A;12_51114427_C_A;12_51112182_C_A;12_51104310_G_A;12_51089287_G_T;12_51088979_T_G;12_51086931_T_C;12_51086275_G_A;12_51080940_T_C;12_51074873_T_A;12_51074199_T_C;12_51064064_A_G;12_51052008_C_T;12_51051921_T_C;12_51051351_G_A;12_51046224_G_A;12_51042890_C_A;12_51040397_G_C;12_51032415_A_G;12_51031817_C_G;12_51021260_G_A;12_51019171_T_C;12_51018116_C_A;12_51011256_A_…	12_51138862_C_T;12_51121629_CA_C;12_51117593_C_A;12_51114427_C_A;12_51112182_C_A;12_51104310_G_A;12_51089734_T_A;12_51089287_G_T;12_51088979_T_G;12_51086931_T_C;12_51086275_G_A;12_51080940_T_C;	12_51089734_T_A;	0.2995049504950495	12	1	50898768	51142450
ENSG00000066117	ENSG00000066117	ENST00000551352_SMARCD1	Q96GM5	12_50471630_A_G	rs2272391	0.0010720787734726821	2.4588962694327568e-05	12.0	1.0900266057155074e-09	-0.4704911878856473	0.0006104842179432151	0.2272689656047446	0.02151359288692492	-0.7135298182677963	0.07907216336323496	0.1068368996971305	True	50471630,50460831,50461352,50461498,50461676,50462647,50463325,50464470,50465355,50467644,50467769,50482211,50485549,50486307,50489270,50489301,50490099,50491141,50491229,50491630,50491821,50563661,50563890,50568265,50570610		12_50486307_CT_C;12_50485549_ACGGGGCTTCACCATGTTTG_A;			12_50491821_A_G;12_50491630_C_T;12_50491229_G_A;12_50491141_C_T;12_50490099_C_G;12_50489301_A_G;12_50489270_C_T;12_50486307_CT_C;12_50485549_ACGGGGCTTCACCATGTTTG_A;12_50482211_T_C;	12_50491821_A_G;12_50491630_C_T;12_50491229_G_A;12_50491141_C_T;12_50490099_C_G;12_50489301_A_G;12_50489270_C_T;		0.4207920792079208	12	1	50478755	50494495
ENSG00000066136	ENSG00000066136	ENST00000372669_NFYC	Q13952	1_41187638_G_C	rs9438948	0.0006667584999731504	7.368562384534296e-06	24.0	1.838225255012315e-09	0.6929195124324119	1.633658020541862e-05	0.3085990805089864	1.874763421275352	0.10843412349942322	0.7829451630755773	0.03014574344675292	True	41187638					1_41187638_G_C;			0.24504950495049505	1	1	41157320	41237275
ENSG00000066379	ENSG00000066379	ENST00000376782_ZNRD1	Q9P1U0	6_30013887_C_T		4.746575522363983e-17	3.9452442983657343e-19	6.0	5.174661820594945e-26	-1.8022668424372053	7.665482983285062e-20	-1.4660262990639017	0.8626575716223254	0.1578436892321562	0.8518773051174107	0.03233776241374087	False	30013887,30014667,30015068,30016381,30016810,30016831,30017071,30017759,30019769,30019804,30021201,30021413,30021941,30022153,30022808,30024365,30024394,30024597,30025179,30025285,30025984,30026422,30027413,30028232,30028424,30028472,30028473,30028807,30028871,30029109,30030385,30030789,30031091,30031362,30035457		6_30029107_GTC_G;		6_30029109_C_G;6_30029107_GTC_G;	6_30031362_C_T;6_30031091_T_C;6_30030789_C_T;6_30030385_C_T;			0.08168316831683169	6	1	30026676	30032686
ENSG00000066427	ENSG00000066427	ENST00000511362_ATXN3	A0A087X1A8	14_92497650_A_G	rs12433086	7.224212131810763e-16	8.641704827914193e-19	47.0	8.343267698687034e-25	1.8306856386102384	0.35322958037887464	0.06792194439613869	1.2338545817066435	0.7736411597313807	0.26875911325008844	-0.17425051862083762	False	92497650,92411752,92412829,92414380,92415976,92419862,92424335,92450260,92452508,92454748,92457396,92459069,92463621,92465242,92474575,92479297,92499811,92503838,92515006,92519904,92522623,92528595,92541373,92542571,92556055				14_92528595_C_T;	14_92556055_T_C;14_92542571_C_A;14_92541373_C_T;	14_92556055_T_C;14_92542571_C_A;14_92541373_C_T;		0.056930693069306926	14	-1	92524896	92572965
ENSG00000066455	ENSG00000066455	ENST00000554700_GOLGA5	Q8TBA6	14_93239362_T_C	rs4904983	0.06994576941372395	0.007457755819047371	4.0	7.665278150021501e-06	-0.3590912308550441	0.0337096812311652	0.12247306108864996	0.013372816737952714	-0.37224290278644895	0.008495242518583487	0.19867081770134346	False	93239362,93238519,93252424,93252491,93253074,93253322,93253368,93253405,93253460,93253874,93254166,93254809,93255790,93256199,93257493,93258317,93258810,93258982,93259431,93260990,93261238,93261321,93261623,93261782,93262769,93263066,93265990,93266015,93269204,93269205,93270373,93271070,93271383,93272764,93273661,93273958,93278286,93278663,93279749,93282240,93286291,93287564,93290856,93290859,932…		14_93286291_AC_A;14_93278286_TA_T;14_93273661_AAAAAT_A;14_93261238_A_ACT;			14_93304983_T_C;14_93303604_C_T;14_93302881_T_C;14_93298898_G_A;14_93298720_T_C;14_93296051_T_G;14_93295435_A_G;14_93295081_G_T;14_93291853_A_G;14_93290859_C_T;14_93290856_T_C;14_93287564_A_C;14_93286291_A_T;14_93286291_AC_A;14_93282240_C_T;14_93279749_G_T;14_93278663_A_G;14_93278286_TA_T;14_93273958_A_G;14_93273661_AAAAAT_A;14_93272764_T_A;14_93271383_T_C;14_93271070_A_G;14_93270373_A_G;14_93269…			0.35396039603960394	14	1	93260576	93306308
ENSG00000066557	ENSG00000066557	ENST00000370952_LRRC40	Q9H9A6	1_70651015_T_C	rs61785270	0.042890531405095404	0.017217758608044063	1.0	0.00021189087869866784	-0.2497661299416873	5.413842762455562e-06	-0.3099043583260206	9.813792850628752e-06	-0.4432614567199689	2.1582681290533813e-05	-0.3430877904260812	False	70651015,70608053,70608132,70609129,70610146,70610215,70610738,70611208,70614427,70618409,70620147,70620329,70625637,70627063,70627355,70630925,70634463,70636364,70641177,70643909,70646053,70646293,70646431,70646502,70647802,70649135,70654078,70658272,70672605,70679891,70686213,70690540,70711236		1_70610738_C_CTA;		1_70611208_A_T;1_70610738_C_CTA;	1_70658272_T_A;1_70654078_C_T;1_70649135_C_T;1_70647802_C_T;1_70646502_C_G;1_70646431_A_C;1_70646293_T_C;1_70646053_A_G;1_70643909_C_T;1_70641177_T_A;1_70636364_C_T;1_70634463_C_T;1_70630925_G_C;1_70627355_C_T;1_70627063_A_G;1_70625637_A_G;1_70620329_T_G;1_70620147_T_C;1_70618409_C_T;1_70614427_T_C;1_70651015_T_C;			0.18564356435643564	1	-1	70610488	70671303
ENSG00000066654	ENSG00000066654	ENST00000431224_THUMPD1	Q9NXG2	16_20756911_A_G		0.0006278187682787883	2.760522028638991e-05	6.0	2.6306270961476903e-08	0.7656761490928441	1.847090298839508e-22	0.8719883831295944	0.0010813911017339263	0.8988653861425431	4.86085601347118e-09	0.6027272719304344	False	20756911,20694067,20694194,20697868,20700016,20700317,20703074,20705241,20706955,20712538,20712837,20714033,20715718,20718939,20719627,20725086,20726035,20727364,20728166,20729699,20731013,20732321,20733134,20740257,20740517,20742185,20743399,20744154,20745431,20746239,20747104,20748331,20757590,20758433,20759548,20760423,20761804,20765744,20771530,20772409,20773108,20773244,20773562,20773764,207…	16_20748331_C_A;	16_20745431_CAAATA_C;16_20745431_CAAATAA_C;		16_20747104_C_T;16_20746239_G_C;16_20745431_CAAATA_C;16_20745431_CAAATAA_C;				0.11633663366336636	16	-1	20744986	20753406
ENSG00000066697	ENSG00000066697	ENST00000489377_MSANTD3	Q96H12	9_103206415_C_T	rs77981340	1.0845301180940004e-05	4.2427042728542055e-07	5.0	2.3388586653197392e-11	-0.8101412718720158	0.014589355216778559	-0.3211983104492587	0.6458265954902797	0.1863333228179035	0.7349189493236231	0.0743958421699421	False	103206415,103239358,103331141,103331653,103333756,103335616,103337110,103337223,103337651,103342805,103345003,103349428,103351495,103352930,103355110,103356531,103357199,103358800,103360309,103364402					9_103206415_C_T;			0.09405940594059406	9	1	103189438	103213511
ENSG00000066926	ENSG00000066926	ENST00000592699_FECH	P22830	18_55219376_G_A	rs673130	4.3844054196311446e-14	3.0889894687827046e-16	10.0	1.152887728292532e-18	-0.9757541303420336	0.6051312083004647	-0.03497403174959539	0.6269814001444882	-0.12944422714415982	0.005167996736558148	0.3131968650917374	False	55219376,55221648,55226383,55230630,55231299				18_55226383_G_C;18_55221648_T_C;	18_55231299_G_A;18_55230630_G_A;18_55226383_G_C;18_55219376_G_A;	18_55231299_G_A;18_55230630_G_A;18_55226383_G_C;18_55221648_T_C;18_55219376_G_A;	18_55226383_G_C;18_55221648_T_C;	0.2871287128712871	18	-1	55215515	55254004
ENSG00000067057	ENSG00000067057	ENST00000433193_PFKP	Q01813	10_3180316_T_C		0.000169828601528871	3.3757978897176192e-06	12.0	8.813233120313231e-11	-0.6813159475929738	0.5763050981741619	0.0448869128054568	1.1946238935167224	-0.10969292792603992	0.5701315311952744	0.04175512194240261	False	3180316								0.3762376237623761	10	1	3108525	3179904
ENSG00000067113	ENSG00000067113	ENST00000264775_PPAP2A	O14494	5_54861793_A_G	rs906757	0.03179198182547606	0.0020578907705583386	6.0	1.3643166181482e-05	-0.4855508062409749	0.005454101858569798	-0.2418822297755289	0.3320693103930984	-0.2656110768272846	0.7370486008529968	0.04361968598570298	False	54861793								0.09653465346534654	5	-1	54720682	54830878
ENSG00000067208	ENSG00000067208	ENST00000540033_EVI5	O60447	1_92727610_T_G	rs2391139	0.01962739236506092	0.0007954277911609543	9.0	9.249405937276694e-08	-0.44353999896939306	0.00019488967083423214	-0.2037253230045916	0.032748424085970236	-0.5023911921306743	0.4332467324790561	0.10274608004282904	True	92727610,92664966,92665389,92668474,92670126,92682284,92688438,92689936,92691971,92696189,92705224,92705638,92708973,92709689,92715207,92735012,92739699,92744651,92745759,92756507,92760807,92761654,92767292,92788769,92791812,92792858,92794758,92795104,92797814,92799151,92800232,92814471,92816148,92818005,92821374,92823598,92825559,92826100,92832179,92846681,92852504,92854663,92867933,92870846,928…		1_93028243_TTTTG_T;1_93023894_T_TCA;1_93016839_CT_C;1_92991624_GT_G;1_92979681_TTA_T;		1_92977275_A_G;1_92976590_G_A;1_92976023_T_G;1_92974595_G_A;	1_93035020_C_T;1_93034221_G_A;1_93034023_G_T;1_93032583_T_C;1_93032520_T_C;1_93032467_G_A;1_93031625_T_C;1_93030735_T_C;1_93029698_T_G;1_93029453_A_G;1_93028243_TTTTG_T;1_93027914_G_A;1_93027862_G_A;1_93024844_C_T;1_93023894_T_TCA;1_93023150_A_C;1_93022678_C_G;1_93022283_A_G;1_93021891_T_C;1_93019313_T_C;1_93016839_CT_C;1_93016228_T_C;1_93013130_G_A;1_93012247_T_C;1_93011572_A_G;1_93010908_T_C;1_…		1_92979354_A_G;	0.15841584158415842	1	-1	92974253	93257961
ENSG00000067334	ENSG00000067334	ENST00000436063_DNTTIP2	Q5QJE6	1_94295170_G_A	rs6685747	1.9756895137958953e-07	4.262501824300047e-09	7.0	1.4537356345161763e-14	-0.3910687856679296	8.080482339338556e-12	-0.3930392449504643	1.997942690780552	-0.21414911833883288	0.3746973391983239	-0.08612970994223446	True	94295170,94197311,94197793,94199322,94202670,94203051,94208444,94208508,94211974,94217804,94218473,94219311,94223769,94224412,94230152,94230231,94230778,94233243,94233399,94237195,94249517,94262473,94267308,94277595,94278929,94283346,94285049,94301503,94302797,94304993,94305011,94305143,94305726,94314917,94315669,94318701,94319185,94320037,94320177,94321972,94322546,94328316,94328589,94331478,943…	1_94342564_C_A;			1_94344716_C_T;1_94334724_A_C;	1_94344110_G_A;1_94343961_G_A;1_94343813_C_T;	1_94344716_C_T;1_94344110_G_A;1_94343961_G_A;1_94343813_C_T;1_94343023_A_G;1_94342564_C_A;	1_94343023_A_G;	0.4356435643564357	1	-1	94333373	94345474
ENSG00000067365	ENSG00000067365	ENST00000562151_METTL22	Q9BUU2	16_8763036_C_T	rs1730967	4.510294486830242e-07	3.9891838691577735e-09	18.0	5.4602839955652066e-12	-0.8323066869543213	6.587636761197588e-05	-0.3743883612409536	0.03575473894563956	0.4040662653658913	0.03739970013028828	0.3462637995449005	False	8763036,8755121,8760314,8760764,8762422,8763374,8766139,8766709,8767878,8768322,8768801,8769633,8771449,8773685,8776753,8779372,8779797,8782236,8782396,8783598,8783971,8784761,8788410,8788758,8789723,8789924								0.1311881188118812	16	1	8715540	8740081
ENSG00000067533	ENSG00000067533	ENST00000366932_RRP15	Q9Y3B9	1_218516310_G_T	rs10495098	1.7270170402777668e-06	1.5067240401950084e-07	2.0	3.3010660035759875e-13	0.3266681862807766	1.7201487508139154e-17	0.4411391150751765	0.06497876543529017	0.19659002257728453	0.07306239393565303	0.14030688859416118	False	218516310,218458058,218458551,218471383,218483973,218483974,218496066		1_218483974_C_CCCT;1_218483973_A_ACCT;			1_218496066_T_C;1_218483974_C_CCCT;1_218483973_A_ACCT;1_218471383_T_C;			0.4356435643564357	1	1	218458629	218511325
ENSG00000067560	ENSG00000067560	ENST00000422781_RHOA	P61586	3_49210732_A_C	rs7617480	0.010079625508114705	0.0005704516357313406	6.0	2.3255405649875402e-06	-0.5790880763433133	0.8787443489910997	-0.014092379472939303	2.6393353816237384	-0.11492357640577988	0.5989397441023747	-0.055824974437134016	True	49210732,49206920,49213637,49214066,49214303,49216472,49218888,49220137,49220448,49222904,49224210,49228800,49228946,49236439,49244657,49245645,49249381,49253492,49255172,49269758,49272589,49275828,49276077,49276724,49284513,49286618,49298139,49298205,49307872,49309787,49317338,49317727								0.20297029702970296	3	-1	49396578	49450431
ENSG00000067606	ENSG00000067606	ENST00000378567_PRKCZ	Q05513	1_2007674_A_G	rs2803307	0.02579466232541207	0.0003619392707169218	27.0	2.7846567380489656e-07	-0.3626915331785616	1.502062638045585e-06	-0.38641903801332667	0.617247678114791	-0.3760986691478347	0.9130034924929232	0.013285661725919384	True	2007674,2005740					1_2005740_T_C;1_2007674_A_G;			0.1905940594059406	1	1	1981909	2116834
ENSG00000068097	ENSG00000068097	ENST00000184956_HEATR6	Q6AI08	17_58156330_A_G	rs1078378	1.2523446037247603e-13	8.288972751926038e-16	11.0	5.8723717832016895e-24	1.1757697853168678	5.395805643733616e-23	1.4107096861181585	0.00010669719624603376	0.8293138727243825	0.01620489709327201	0.3515793196403263	False	58156330,58156427,58157149,58167485,58168222,58168984,58172447,58173772,58174749,58176504,58176651,58176790								0.08663366336633663	17	-1	58120555	58156292
ENSG00000068120	ENSG00000068120	ENST00000393818_COASY	Q13057-2	17_40786248_C_T	rs12937984	0.008094650250264896	0.00016804349202208352	16.0	1.59016179603925e-07	0.3382010705864548	6.68195668793712e-06	0.32038275334445177	0.7308210082327505	0.0911724553711264	0.8449773167019218	-0.01312097071318874	False	40786248,40698542,40703535,40704008,40704185,40704563,40705100,40705724,40706906,40707444,40710355,40710438,40711056,40711769,40711808,40714014,40714804,40715570,40716520,40719474,40720605,40721360,40721850,40723391,40724276,40725799,40727427,40728229,40730728,40730825,40732698,40735469,40737117,40738610,40740277,40742454,40742683,40744320,40744908,40745645,40746395,40748737,40749813,40750099,407…	17_40714804_C_A;	17_40715116_GAGAAGTGCCCGTGGAGCCCCTGGATGTCCCCTTACCCTCCACGATCAGGCCAGCTTCCCCCGTGGCCGGGTCTCCAAAGCAGCCGGTGCGTGGCTACTACCGTGGCGCTGTCGGTGGCACGTTTGACCGCCTGCACAACGCCCACAAGGTGTTGCTCAGTGTCGCGTGCATCCTGGCCCAGGAGCAGCTTGTGGTGGGAGTAGCAGACAAAGATCTGTTGAAGAGTGAGTAAGAGGGACCCTGGACTAGGGTGGAGGATCCCCAAATCTCCCCACCCCCGACCCTTATGCCGAGATCAAGGAAGGGTAGGGCCATTCATTACTTCCCACCCTTCCCAAATGTCACAGTGGTTGACACTCAATTGGTGCTAAGGCCATTTTGTCAAA…	17_40715116_GAGAAGTGCCCGTGGAGCCCCTGGATGTCCCCTTACCCTCCACGATCAGGCCAGCTTCCCCCGTGGCCGGGTCTCCAAAGCAGCCGGTGCGTGGCTACTACCGTGGCGCTGTCGGTGGCACGTTTGACCGCCTGCACAACGCCCACAAGGTGTTGCTCAGTGTCGCGTGCATCCTGGCCCAGGAGCAGCTTGTGGTGGGAGTAGCAGACAAAGATCTGTTGAAGAGTGAGTAAGAGGGACCCTGGACTAGGGTGGAGGATCCCCAAATCTCCCCACCCCCGACCCTTATGCCGAGATCAAGGAAGGGTAGGGCCATTCATTACTTCCCACCCTTCCCAAATGTCACAGTGGTTGACACTCAATTGGTGCTAAGGCCATTTTGTCAAA…	17_40715116_GAGAAGTGCCCGTGGAGCCCCTGGATGTCCCCTTACCCTCCACGATCAGGCCAGCTTCCCCCGTGGCCGGGTCTCCAAAGCAGCCGGTGCGTGGCTACTACCGTGGCGCTGTCGGTGGCACGTTTGACCGCCTGCACAACGCCCACAAGGTGTTGCTCAGTGTCGCGTGCATCCTGGCCCAGGAGCAGCTTGTGGTGGGAGTAGCAGACAAAGATCTGTTGAAGAGTGAGTAAGAGGGACCCTGGACTAGGGTGGAGGATCCCCAAATCTCCCCACCCCCGACCCTTATGCCGAGATCAAGGAAGGGTAGGGCCATTCATTACTTCCCACCCTTCCCAAATGTCACAGTGGTTGACACTCAATTGGTGCTAAGGCCATTTTGTCAAA…	17_40715116_GAGAAGTGCCCGTGGAGCCCCTGGATGTCCCCTTACCCTCCACGATCAGGCCAGCTTCCCCCGTGGCCGGGTCTCCAAAGCAGCCGGTGCGTGGCTACTACCGTGGCGCTGTCGGTGGCACGTTTGACCGCCTGCACAACGCCCACAAGGTGTTGCTCAGTGTCGCGTGCATCCTGGCCCAGGAGCAGCTTGTGGTGGGAGTAGCAGACAAAGATCTGTTGAAGAGTGAGTAAGAGGGACCCTGGACTAGGGTGGAGGATCCCCAAATCTCCCCACCCCCGACCCTTATGCCGAGATCAAGGAAGGGTAGGGCCATTCATTACTTCCCACCCTTCCCAAATGTCACAGTGGTTGACACTCAATTGGTGCTAAGGCCATTTTGTCAAA…		17_40716520_A_G;	0.448019801980198	17	1	40713485	40718295
ENSG00000068650	ENSG00000068650	ENST00000487903_ATP11A	E9PEJ6	13_113535949_G_C	rs1278768	2.547614008584824e-10	1.6761604164339402e-12	16.0	9.930282241721556e-21	-0.7431557977739351	0.8431270084913248	-0.00801560828487951	0.2691631474518064	-0.3618698364190371	0.16590303661141598	0.11553281818323535	False	113535949,113532990,113533594,113533651,113533653,113534382,113534907,113535630,113535742,113536132,113537311,113537448,113539523,113539894,113543499,113543884			13_113536132_T_C;	13_113539894_C_T;13_113539523_G_A;13_113537448_G_A;13_113537311_C_T;13_113536132_T_C;	13_113536132_T_C;13_113535742_A_G;13_113535630_T_C;13_113534907_T_C;13_113534382_T_C;13_113533653_G_T;13_113533651_C_A;13_113533594_G_C;13_113532990_T_C;13_113535949_G_C;	13_113539894_C_T;13_113539523_G_A;13_113537448_G_A;13_113537311_C_T;13_113536132_T_C;13_113535742_A_G;13_113535630_T_C;13_113534907_T_C;13_113534382_T_C;13_113533653_G_T;13_113533651_C_A;13_113533594_G_C;13_113532990_T_C;13_113535949_G_C;	13_113536132_T_C;13_113534907_T_C;	0.4628712871287129	13	1	113344643	113541482
ENSG00000068724	ENSG00000068724	ENST00000409245_TTC7A	Q9ULT0	2_47143230_G_T	rs6544939	1.385295497333534e-06	1.6945510670746592e-08	14.0	9.902145586218846e-15	0.7240232334120351	3.526815081885472e-06	0.3832811385942879	3.789725795306695	0.170251290710568	0.963198738829038	0.005762105494025671	False	47143230,47143929					2_47143929_T_A;			0.1113861386138614	2	1	47143296	47303276
ENSG00000068745	ENSG00000068745	ENST00000432678_IP6K2	Q9UHH9	3_48819376_G_T	rs12496747	2.030276428749601e-15	4.230168988220428e-18	28.0	6.501638759432052e-30	1.949445776561772	1.3659529606161134e-05	0.5183643367816982	0.7370924464402429	-0.01570065830318912	0.9665061767101214	0.0065994811897873715	False	48819376,48768150,48771753,48849136					3_48771753_C_T;3_48768150_G_A;	3_48771753_C_T;3_48768150_G_A;		0.07178217821782178	3	-1	48725436	48777786
ENSG00000068793	ENSG00000068793	ENST00000560848_CYFIP1	Q7L576	15_22915961_G_A	rs78446213	1.733402262555791e-08	1.6645484979175232e-10	14.0	5.0408759775885215e-12	0.534072186803776	2.707944073282638e-12	0.584014396007562	0.0029523308776677483	0.40414698137647465	0.01742820964877206	0.2296540922241288	True	22915961,22916124,22916208,22916419,22918379,22919498,22919704,22920718,22922551,22923742,22923914,22924706,22925851		15_22922551_TTTC_T;15_22919704_AGACG_A;			15_22924706_C_T;15_22923914_T_C;15_22923742_G_C;15_22922551_TTTC_T;15_22920718_C_T;15_22919704_AGACG_A;15_22919498_G_C;15_22918379_G_C;15_22916419_C_T;15_22916208_G_A;15_22916124_G_A;15_22915961_G_A;	15_22925851_C_T;15_22924706_C_T;15_22923914_T_C;15_22923742_G_C;15_22922551_TTTC_T;15_22920718_C_T;15_22919704_AGACG_A;15_22919498_G_C;15_22918379_G_C;15_22916419_C_T;15_22916208_G_A;15_22916124_G_A;15_22915961_G_A;	15_22925851_C_T;	0.1806930693069307	15	1	22892005	23006016
ENSG00000068878	ENSG00000068878	ENST00000404125_PSME4	Q14997	2_53864624_T_G	rs61671599	1.6246389425787574e-07	2.428741585529994e-09	10.0	7.748934486003061e-16	0.225003162860922	2.3586812773227886e-22	0.4406447452405903	0.008528523322832235	0.3514023617283427	2.0959045762716653e-06	0.2544186409333817	False	53864624,53865404,53865584,53866241,53866254,53887350,53905298,53907632,53907875,53916849,53993487,54011379,54027845								0.34405940594059403	2	-1	54091204	54197977
ENSG00000068912	ENSG00000068912	ENST00000378239_ERLEC1	Q96DZ1	2_53941125_A_T	rs62137566	7.162697947314174e-13	1.4111757573957791e-14	4.0	1.124166854386609e-23	1.0463274861537368	0.6187550484153905	0.02612544125619829	1.0346152199933003	0.5049488065861336	0.42246834830076396	-0.07718780385477353	True	53941125,53866055,53867308,53869270,53872051,53872803,53879610,53885647,53886995,53888701,53893739,53893881,53894043,53895499,53895843,53896048,53897525,53910158,53915437,53915863,53917666,53917801,53921270,53928465,53931190,53932006,53936496,53939045,53947717,53948649,53949945,53951336,53955513,53955850,53956883,53958919,53962309,53963242								0.2301980198019802	2	1	54014181	54045956
ENSG00000069248	ENSG00000069248	ENST00000261396_NUP133	Q8WUM0	1_229717856_C_T	rs6687883	0.0021937621191190177	0.00012891126261019303	5.0	6.4841060117858474e-09	-0.2882887228293188	7.994561485595003e-10	-0.3451401503969917	0.6314417998130464	-0.2587957797311915	0.4975922903499699	-0.0557811244615789	True	229717856,229649372,229652698,229655821,229655892,229656562,229657794,229657902,229658797,229659310,229660891,229662344,229669287,229670389,229681844,229692975,229693666,229693846,229694866,229695687,229697318,229697863,229698931,229699015,229700174,229701489,229703456,229704706,229706214,229710455,229712340,229714955,229717979,229718001,229718135								0.21782178217821785	1	-1	229577045	229644103
ENSG00000069482	ENSG00000069482	ENST00000265643_GAL	P22466	11_68408289_T_C	rs882979	1.1617413820835758e-09	6.627200309462882e-11	2.0	2.6020353821415313e-14	0.5346264001459099	9.795629013315383e-14	0.4986882861565654	0.00834908247671092	0.34373077954574205	4.3181977891131154e-05	0.4625068379691226	False	68408289								0.2351485148514852	11	1	68451247	68458643
ENSG00000069849	ENSG00000069849	ENST00000475483_ATP1B3	P54709	3_141581203_A_G	rs4260404	9.970163628268185e-09	1.1865434997393648e-10	11.0	5.942933087833833e-13	0.7199669951181725	0.04238829703438361	-0.2126180469339391	0.5929731976885112	0.2827865691238558	0.3869110681740721	0.09857338938639026	False	141581203,141582899,141585189,141587149,141590852,141591626,141592022,141598174,141604377,141605961,141606244,141607881,141609884,141613830,141615989,141616548,141617449,141618541,141618733,141619087,141624629,141624862,141627083,141628001		3_141624862_AATAC_A;			3_141628001_C_A;3_141627083_C_T;3_141624862_AATAC_A;3_141624629_A_G;3_141619087_G_A;3_141618733_T_G;3_141618541_G_A;3_141617449_A_G;3_141616548_T_A;3_141615989_G_A;3_141613830_G_A;3_141609884_A_C;3_141607881_G_T;3_141606244_A_G;3_141605961_G_A;3_141604377_G_A;3_141598174_A_G;	3_141628001_C_A;3_141627083_C_T;3_141624862_AATAC_A;3_141624629_A_G;3_141619087_G_A;3_141618733_T_G;3_141618541_G_A;3_141617449_A_G;3_141616548_T_A;3_141615989_G_A;3_141613830_G_A;3_141609884_A_C;3_141607881_G_T;3_141606244_A_G;3_141605961_G_A;3_141604377_G_A;3_141598174_A_G;		0.12623762376237624	3	1	141594966	141645356
ENSG00000069869	ENSG00000069869	ENST00000435532_NEDD4	P46934-4	15_56135559_A_C	rs11633263	0.04784841280873778	0.0016203664456813007	12.0	5.059404008283158e-07	0.3334502050771975	5.919303824993171e-07	0.3377766612872661	0.8446672179802177	0.2586641576146185	0.3919338113809512	0.07033794189858923	True	56135559,56121334,56122347,56124535,56125135,56125182,56125578,56125612,56126818,56126857,56130909,56133889,56135709,56140995,56145267,56154064,56159103,56159118,56160254,56161919,56168162,56174827,56180297,56181052,56186767,56194877,56196253,56197290,56209400,56210499,56224007,56226138,56227981,56228989,56229760,56230498,56230501,56236314,56236588,56241024,56248743,56250273,56252609,56255589,562…		15_56209400_GAAC_G;15_56160254_CA_C;		15_56121334_T_C;	15_56273446_T_C;15_56267251_C_T;15_56266789_T_C;15_56263346_T_C;15_56262339_C_G;15_56262183_T_G;15_56255589_T_C;15_56252609_C_T;15_56250273_A_G;15_56248743_T_G;15_56241024_C_T;15_56236588_G_A;15_56236314_T_C;15_56230501_G_A;15_56230498_G_A;15_56229760_A_G;15_56228989_T_G;15_56227981_G_T;15_56226138_G_T;15_56224007_T_G;15_56210499_A_G;15_56209400_GAAC_G;15_56197290_C_A;15_56196253_C_T;15_56194877_…	15_56273446_T_C;15_56267251_C_T;15_56266789_T_C;15_56263346_T_C;15_56262339_C_G;15_56262183_T_G;15_56255589_T_C;15_56252609_C_T;15_56250273_A_G;15_56248743_T_G;15_56241024_C_T;15_56236588_G_A;15_56236314_T_C;15_56230501_G_A;15_56230498_G_A;15_56229760_A_G;15_56228989_T_G;15_56227981_G_T;15_56226138_G_T;15_56224007_T_G;15_56210499_A_G;15_56209400_GAAC_G;15_56197290_C_A;15_56196253_C_T;15_56194877_…		0.33663366336633666	15	-1	56119120	56285944
ENSG00000069974	ENSG00000069974	ENST00000561545_RAB27A	P51159	15_55606213_T_C	rs11638111	0.0009900101041761169	2.2580505689032238e-05	12.0	8.77382690696522e-09	0.6856790244389664	0.006170366437772497	0.2510053619757713	1.693966805767416	0.02016818916659935	0.6280932343662036	-0.055622185389622165	True	55606213					15_55606213_T_C;			0.2153465346534653	15	-1	55495164	55611311
ENSG00000069998	ENSG00000069998	ENST00000463033_CECR5	Q9BXW7-2	22_17630486_C_A	rs1034859	6.983929708898639e-11	9.833876224177604e-13	7.0	3.5489380266759677e-19	0.8583580767395521	0.0004786824541105953	-0.2837426381449236	2.3004336264998213e-06	0.08051983083078351	1.1464156188873327e-06	-0.4553650147546873	False	17630486,17629544					22_17629544_G_A;22_17630486_C_A;		22_17630486_C_A;	0.4257425742574257	22	-1	17618401	17646177
ENSG00000070010	ENSG00000070010	ENST00000399523_UFD1L	Q92890	22_19506456_G_T	rs2073760	0.03240213963149337	0.00114749349307656	11.0	4.792189363379478e-07	0.2688820038318765	0.43667767903238897	0.0374682069359688	2.8674084327670144	0.15147242182153542	0.5450636750880838	0.10705211999124707	True	19506456								0.4826732673267327	22	-1	19437433	19466738
ENSG00000070047	ENSG00000070047	ENST00000264555_PHRF1	E9PJ24	11_566936_C_A	rs12802200	0.05017486409743677	0.0034189568651040968	6.0	7.403046086422366e-06	-0.346213021819956	0.001283417839570485	-0.2416946969887276	0.5222869734249186	-0.5600084784905199	0.01261625386623328	-0.2635957459149887	False	566936,551235,554047,562437,567627,570094,571035,571039,571568,575553								0.15346534653465346	11	1	576486	612222
ENSG00000070061	ENSG00000070061	ENST00000374647_IKBKAP	O95163	9_111782531_T_G	rs7776	7.36212349233885e-05	4.117489673732208e-06	4.0	2.243919594076283e-09	-0.22243530643025647	1.0097112315434153e-11	-0.4357918010225806	0.2916523499646152	-0.27949038264144843	0.004768822374149958	-0.2256904116489187	True	111782531,111875085								0.2797029702970297	9	-1	111629797	111696396
ENSG00000070087	ENSG00000070087	ENST00000239940_PFN2	P35080	3_149689979_C_G	rs61616747	2.186832916212239e-06	2.2816389483775832e-08	17.0	3.6063688172775196e-12	0.4682222322910636	0.4109822594406287	-0.04257538328604885	0.002948396223498231	0.16318666738151233	0.03426469725710701	0.15714580819335922	True	149689979,149522978,149530625,149543102,149584710,149587120,149624226,149624666,149626430,149629176,149650011,149659446,149675185,149685233,149686076,149692615,149693218,149694074,149695392,149698581,149700519,149704247,149708715,149709361,149709608,149710579,149711753,149711843,149714798,149715380,149716063,149723131,149730465,149732017,149733558,149733712,149736779,149736780,149738226,149739928…		3_149748957_CCTAA_C;3_149730465_GTTTT_G;3_149692615_CT_C;		3_149686076_T_C;	3_149749577_A_T;3_149749571_G_C;3_149749463_T_C;3_149748957_CCTAA_C;3_149747107_G_C;3_149745214_T_G;3_149741400_T_C;3_149739928_T_C;3_149738226_T_C;3_149736780_A_T;3_149736779_G_T;3_149733712_C_A;3_149733558_A_G;3_149732017_C_A;3_149730465_GTTTT_G;3_149723131_G_A;3_149716063_T_G;3_149715380_C_T;3_149714798_A_T;3_149711843_T_C;3_149711753_A_G;3_149710579_A_T;3_149709608_A_G;3_149709361_A_G;3_14970…	3_149686076_T_C;3_149685233_C_G;		0.3935643564356436	3	-1	149682691	149768575
ENSG00000070371	ENSG00000070371	ENST00000263200_CLTCL1	P53675	22_19165216_G_A	rs2854642	2.470206423334127e-06	3.682647190750419e-08	12.0	5.927668563367659e-11	0.7151580824977838	3.9461029937306436e-11	0.7246794745855971	4.88720123598386	0.19577388027896947	0.6876462473464698	-0.06736967676296951	False	19165216,19156708,19157000,19158593,19158756,19165478,19165997,19167801,19169332,19170181,19171345,19172321,19172939,19173350,19174524,19179601,19181473,19182874,19183157,19183787,19185056,19185606,19187009,19188078,19189027,19192905,19193263,19195296,19195680,19196673,19196728,19196892,19197949,19199407,19200153,19200168,19201254,19201916,19204210,19204392,19204851,19204897,19205043,19205214,192…	22_19223352_T_C;22_19197949_G_A;22_19195680_T_C;22_19183787_A_G;	22_19263451_AAAGTTAACATTAGGTAAACACTTG_A;22_19260577_A_AG;22_19260576_CA_C;22_19260575_CCA_C;22_19256056_C_CA;22_19246937_CA_C;22_19230084_T_TG;22_19229517_G_GT;22_19222453_A_AT;22_19217306_C_CCA;22_19214071_A_AG;22_19201254_CG_C;22_19200168_G_GA;22_19200139_GAAAGAAAGAGAAAGAAA_G;22_19196673_C_CA;22_19183157_C_CT;		22_19279221_C_G;	22_19278954_C_A;22_19277809_G_T;22_19275606_C_G;22_19273370_G_C;22_19273227_A_G;22_19272806_G_A;22_19267923_A_G;22_19263906_G_A;22_19263451_AAAGTTAACATTAGGTAAACACTTG_A;22_19263083_T_C;22_19262458_T_C;22_19262039_A_G;22_19260578_C_G;22_19260577_AC_CG;22_19260577_AC_CG;22_19260577_A_AG;22_19260577_A_C;22_19260576_CA_C;22_19260575_CCA_C;22_19259784_G_A;22_19259781_T_A;22_19259526_A_G;22_19259354_T_G…	22_19212947_T_C;22_19212708_C_T;22_19212655_T_G;22_19209167_A_G;22_19174524_G_A;22_19173350_G_A;22_19172939_C_T;22_19172321_G_T;22_19171345_C_T;		0.09405940594059406	22	-1	19166986	19279239
ENSG00000070413	ENSG00000070413	ENST00000608548_DGCR2	F6SYP7	22_19093033_T_C	rs2800970	0.022575455210799043	0.0012000671658620589	7.0	1.7154538233908771e-06	0.4456870755260489	0.0745162192084462	-0.0718774636831199	0.9467405515481282	0.19067619564625726	0.9549390287529884	-0.006273620313666185	False	19093033,19026025,19026613,19026877,19027597,19028320,19028476,19028480,19030007,19030113,19030336,19030722,19032444,19032509,19032965,19033532,19033747,19034240,19034829,19035697,19036479,19036739,19038847,19039758,19040122,19040775,19040878,19041896,19042542,19042822,19045274,19045784,19046735,19048413,19048688,19049278,19049602,19050007,19050110,19050599,19050635,19050878,19051381,19052972,190…	22_19026613_A_G;	22_19080501_AAGAAG_A;22_19080410_AGAG_A;22_19078592_A_AG;22_19050599_T_TCCATGTC;22_19045274_C_CCTGT;22_19040122_CA_C;22_19033747_AT_A;22_19033532_T_TC;22_19032509_GT_G;22_19032443_TT_T;22_19028475_GT_G;		22_19048413_A_G;22_19026613_A_G;22_19026025_A_G;	22_19109609_A_C;22_19108548_T_C;22_19107596_A_G;22_19107437_A_G;22_19106120_A_C;22_19105966_G_T;22_19100743_T_C;22_19098642_G_A;22_19098259_T_G;22_19098149_T_A;22_19097680_G_C;22_19095688_G_A;22_19095664_A_T;22_19094327_A_T;22_19094165_C_T;22_19093085_A_G;22_19093047_T_C;22_19090267_G_C;22_19090249_T_C;22_19090070_C_T;22_19089187_G_A;22_19088607_C_G;22_19087067_A_G;22_19086904_C_G;22_19086520_T_C…	22_19109609_A_C;22_19108548_T_C;22_19107596_A_G;22_19107437_A_G;22_19106120_A_C;22_19105966_G_T;22_19100743_T_C;22_19098642_G_A;22_19098259_T_G;22_19098149_T_A;22_19097680_G_C;22_19095688_G_A;22_19095664_A_T;22_19094327_A_T;22_19094165_C_T;22_19093085_A_G;22_19093047_T_C;22_19090267_G_C;22_19090249_T_C;22_19090070_C_T;22_19089187_G_A;22_19088607_C_G;22_19087067_A_G;22_19086904_C_G;22_19086520_T_C…	22_19048413_A_G;	0.3886138613861386	22	-1	19023795	19109967
ENSG00000070444	ENSG00000070444	ENST00000575402_MNT	Q99583	17_2295405_C_T	rs1545717	0.002876832125222025	9.605983010458026e-05	9.0	1.4711652712702155e-08	-0.4178962036132441	1.346635327268518e-09	-0.38353546871739735	0.3072261378806129	-0.268173149753114	0.4176617002998532	-0.0950727878471411	False	2295405					17_2295405_C_T;			0.36386138613861385	17	-1	2287354	2304412
ENSG00000070501	ENSG00000070501	ENST00000265421_POLB	P06746	8_42194394_A_G	rs7462320	0.07642871164087348	0.0018333581669257336	18.0	3.4443253833230093e-06	-0.4076739883500013	1.4115336607830039e-07	-0.4080374838839612	0.11775306307260662	-0.2619800340364893	0.3049121060303397	-0.08987393284422288	True	42194394								0.14108910891089108	8	1	42195972	42229326
ENSG00000070540	ENSG00000070540	ENST00000262139_WIPI1	Q5MNZ9-2	17_66440514_T_C	rs1030098	6.560380320407349e-07	9.687437418449722e-09	11.0	7.883129208379301e-13	0.45752334234403	1.4164089355745518e-16	0.5298096130836919	0.005975053887068949	0.4272546154342667	0.06076805479803073	0.2323446993207172	False	66440514,66433493,66434384,66435340,66442130,66452641		17_66452641_GGAAA_G;17_66434384_G_GGCAGCCCT;			17_66452641_GGAAA_G;17_66442130_G_C;17_66435340_T_G;17_66434384_G_GGCAGCCCT;17_66434384_G_T;17_66433493_C_T;17_66440514_T_C;	17_66452641_GGAAA_G;17_66442130_G_C;17_66435340_T_G;17_66434384_G_GGCAGCCCT;17_66434384_G_T;17_66433493_C_T;17_66440514_T_C;		0.3910891089108911	17	-1	66417089	66453654
ENSG00000070614	ENSG00000070614	ENST00000261797_NDST1	P52848	5_149937739_G_A	rs11994	0.021246242608651083	0.0009789714822323054	8.0	3.974539429361349e-07	0.15133222768855606	2.348157814478089e-05	0.14571568874470606	0.8343452724412902	0.25029841251281404	0.38072373060422027	0.10042428033434757	False	149937739,149903130,149903859,149904234,149906348,149906520,149908226,149908675,149908765,149909931,149910402,149910525,149910986,149912064,149912087,149912762,149913682,149917790,149921251,149923209,149923361,149923968,149935680,149937495,149937899,149937956,149939564		5_149937495_TA_T;5_149912087_CT_C;		5_149937495_TA_T;5_149935680_A_G;5_149937739_G_A;	5_149923968_G_A;5_149923361_A_G;5_149923209_C_T;5_149921251_G_C;5_149917790_C_T;5_149913682_G_A;5_149912762_A_G;5_149912087_CT_C;5_149912064_C_A;5_149910986_T_C;5_149910525_G_A;5_149910402_A_C;5_149909931_C_T;5_149908765_G_C;5_149908675_C_T;5_149908226_G_A;5_149906520_G_A;5_149906348_A_C;5_149904234_A_G;5_149903859_G_T;5_149903130_A_G;			0.4183168316831683	5	1	149865381	149937773
ENSG00000070669	ENSG00000070669	ENST00000451771_ASNS	P08243	7_97487174_G_A	rs2237288	6.426498896942909e-14	4.5806378870235274e-15	1.0	3.4786247372414453e-20	0.8879311149200414	0.09731957341151434	0.13806064587580855	0.07142961230932006	0.30436703961892153	0.08421721153258564	0.2063188344085632	False	97487174,97490557,97496179,97501325,97502035,97503140,97503807,97505444,97507366,97511370					7_97490557_C_G;7_97487174_G_A;	7_97490557_C_G;7_97487174_G_A;		0.297029702970297	7	-1	97481430	97501854
ENSG00000070718	ENSG00000070718	ENST00000396926_AP3M2	P53677	8_42019613_G_A	rs12547064	1.3545127476974574e-05	1.5875465942958007e-07	17.0	4.780148971180167e-13	-0.5778870069259455	1.7668637097406276e-24	-0.7743116131002971	0.00018860207799395966	-0.5599234649680023	2.2899002055308484e-05	-0.4568373734573954	True	42019613,41998778,41999792,42001215,42001906,42002818,42002959,42003224,42006501,42006818,42008186,42008456,42008489,42010466,42010602,42011339,42013778,42015152,42016405,42024453,42026393,42026987,42028077,42029712,42031886,42032131,42043493,42044406,42044541,42044954,42046212,42047467,42049368		8_42015152_C_CAT;		8_42028077_G_A;8_42026987_C_T;8_42011339_A_G;8_42010602_G_A;8_42010466_A_G;	8_42028077_G_A;8_42026987_C_T;8_42026393_T_C;8_42024453_G_A;8_42016405_A_G;8_42015152_C_CAT;8_42015152_C_T;8_42013778_T_C;8_42011339_A_G;8_42019613_G_A;	8_42028077_G_A;8_42026987_C_T;8_42026393_T_C;8_42024453_G_A;8_42016405_A_G;8_42015152_C_CAT;8_42015152_C_T;8_42013778_T_C;8_42011339_A_G;8_42010602_G_A;8_42019613_G_A;		0.400990099009901	8	1	42010464	42029191
ENSG00000070759	ENSG00000070759	ENST00000493974_TESK2	Q96S53-3	1_45859332_G_A	rs7536135	1.8301183721565396e-11	2.3924321899683903e-13	7.0	5.2934881909516916e-18	0.8359709870723551	0.007416602157782331	0.13930847363632395	0.8210243717527514	0.13915174919837447	0.9014396762924292	-0.021512740687844808	False	45859332,45797505,45804050,45806432,45807358,45810091,45813034,45813441,45813820,45813941,45814058,45814103,45815580,45818421,45819069,45819489,45819872,45820149,45821393,45823484,45826272,45827968,45828943,45830824,45831915,45834773,45835041,45839643,45843086,45843151,45843810,45847558,45847562,45847981,45848931,45849090,45849311,45849792,45850590,45852564,45853539,45854087,45857176,45858389,458…		1_45948419_AG_A;1_45922977_CAT_C;1_45879088_TC_T;1_45879088_TC_T;1_45860313_TA_T;1_45847560_AGG_A;1_45834772_TAC_T;		1_45956828_C_G;1_45810091_A_G;	1_45955868_T_C;1_45948419_AG_A;1_45941349_G_T;1_45937695_G_A;1_45936351_G_A;1_45930270_A_C;1_45930246_C_T;1_45927517_G_T;1_45926495_C_G;1_45924230_C_T;1_45922977_CAT_C;1_45920406_G_A;1_45919234_A_C;1_45916061_G_A;1_45913860_T_C;1_45912005_C_T;1_45909994_A_G;1_45908782_C_T;1_45907180_A_G;1_45902219_T_G;1_45902048_G_A;1_45899795_A_G;1_45899114_G_A;1_45891758_G_A;1_45891543_G_T;1_45891458_C_T;1_4589…			0.2747524752475248	1	-1	45809555	45956872
ENSG00000070770	ENSG00000070770	ENST00000563307_CSNK2A2	P19784	16_58209745_C_T	rs1035549	0.0010046834819437606	4.585005775043275e-05	6.0	6.565114743059927e-09	0.24608737185502305	4.869100796929483e-12	0.3808489754057818	1.3269606312932642	0.5021915194719035	0.599225836851319	0.05557254200936912	True	58209745,58200035,58203156,58204645,58204900,58205005,58205015,58205845,58206826,58210528,58213404,58214198,58214275,58225191,58225590,58227983,58229435		16_58214275_GT_G;16_58213404_CA_C;16_58203155_GT_G;			16_58229435_A_C;16_58227983_C_T;16_58225191_C_T;16_58214275_GT_G;16_58214198_C_A;16_58213404_CA_C;16_58210528_G_A;16_58206826_T_C;16_58205845_A_G;16_58205015_T_G;16_58205005_T_C;16_58204900_C_G;16_58204645_T_A;16_58203156_T_G;16_58203155_GT_G;16_58200035_A_C;16_58209745_C_T;			0.2425742574257425	16	-1	58191811	58231824
ENSG00000070814	ENSG00000070814	ENST00000451292_TCOF1	Q13428-3	5_149736286_G_C	rs75106384	9.69755104254672e-23	1.5255792189374547e-25	16.0	6.196329873585568e-32	-1.8307267519599653	0.4429974059822991	0.06140714389398873	0.1331856598235564	-0.487724330357461	0.046242822900169546	0.2712662366360208	True	149736286,149704854,149705385,149705793,149705865,149708385,149708448,149708655,149709528,149709547,149709794,149711083,149711577,149711747,149712236,149713086,149713249,149715674,149715760,149716276,149716362,149716652,149716858,149717935,149719400,149722058,149726404,149729198,149729945,149731097,149736363,149738608,149738760,149740240,149740354,149742825,149749409,149753988,149756770,149756825…		5_149775448_A_AG;5_149759065_TCTCTC_T;5_149759063_GCTCT_G;5_149756180_ACAGGTGAGGCCTAGAAGGAGCAGGCCCATCCCACCCACACCTGTTCCTGAGCCAGGGCTGAGGATGGGCTTGACTGGGGGCTAGTGTTGCCTGCAGGTGTGCAGAAGCCTCAGAGGTAGCCTCAACACAGCTTCCTTCCCTATCTTTCACTCCATGTCTCCTCTGCCCATCAGAGCTCCAGGGTCTCTGTCTTGTTTGCCTTTTGAGGTCCTCCTGCTGATTGATTCCCTGTGGTTTTCACAAGCTCTGGAGTTCCCACCCTGCCAGGTGCTGCCCTTGTCTGGGGTTGCTGAGGCGCTGTTCCTCAGGGAAGTCCTGTCTCTGTGGA…	5_149762739_C_T;5_149756180_ACAGGTGAGGCCTAGAAGGAGCAGGCCCATCCCACCCACACCTGTTCCTGAGCCAGGGCTGAGGATGGGCTTGACTGGGGGCTAGTGTTGCCTGCAGGTGTGCAGAAGCCTCAGAGGTAGCCTCAACACAGCTTCCTTCCCTATCTTTCACTCCATGTCTCCTCTGCCCATCAGAGCTCCAGGGTCTCTGTCTTGTTTGCCTTTTGAGGTCCTCCTGCTGATTGATTCCCTGTGGTTTTCACAAGCTCTGGAGTTCCCACCCTGCCAGGTGCTGCCCTTGTCTGGGGTTGCTGAGGCGCTGTTCCTCAGGGAAGTCCTGTCTCTGTGGAGCATGGACATGCTCCTGCAGTGTGGAGCGATGGGGTTGAGAT…	5_149779806_G_T;	5_149775448_A_AG;5_149770626_C_T;5_149770058_C_T;5_149768381_G_A;5_149762739_C_T;5_149761236_T_G;5_149759464_G_A;5_149759065_TCTCTC_T;5_149759063_GCTCT_G;5_149756825_A_C;5_149756180_ACAGGTGAGGCCTAGAAGGAGCAGGCCCATCCCACCCACACCTGTTCCTGAGCCAGGGCTGAGGATGGGCTTGACTGGGGGCTAGTGTTGCCTGCAGGTGTGCAGAAGCCTCAGAGGTAGCCTCAACACAGCTTCCTTCCCTATCTTTCACTCCATGTCTCCTCTGCCCATCAGAGCTCCAGGGTCTCTGTCTTGTTTGCCTTTTGAGGTCCTCCTG…	5_149770626_C_T;5_149770058_C_T;5_149768381_G_A;5_149762739_C_T;5_149761236_T_G;5_149759464_G_A;5_149759065_TCTCTC_T;5_149759063_GCTCT_G;		0.07673267326732673	5	1	149737202	149779871
ENSG00000070831	ENSG00000070831	ENST00000344548_CDC42	P60953	1_22405398_G_A	rs2072921	0.02255091150632197	0.0013973855420584126	6.0	9.012605099543429e-07	0.616603376619917	0.03727081408965408	0.1509442850593498	2.5370069597243146	0.20371076347180872	0.38536998454474336	-0.10908283287117904	True	22405398,22374032,22374693,22375190,22377543,22377718,22378670,22379360,22382739,22384077,22386859,22389388,22390078,22391563,22397248,22398905,22401024,22401538,22412645,22420449,22421113,22425642,22430069,22431337,22442171,22448448,22458637,22461627,22462143		1_22384077_ATG_A;			1_22412645_A_G;1_22401538_G_A;1_22401024_G_A;1_22398905_A_G;1_22397248_C_T;1_22391563_G_C;1_22390078_G_A;1_22389388_A_G;1_22386859_A_G;1_22384077_ATG_A;1_22382739_A_G;1_22379360_G_A;1_22405398_G_A;			0.12376237623762375	1	1	22379120	22419437
ENSG00000070886	ENSG00000070886	ENST00000538803_EPHA8	P29322	1_22890075_A_C	rs209737	3.858451608969083e-18	5.536710142251566e-20	3.0	7.171599000168297e-26	1.3706438337597886	8.061671436786625e-07	0.3869420055751704	0.3518513214450357	0.33264361921488605	0.9354130540351476	-0.01586256187079904	False	22890075,22889875				1_22890075_A_C;				0.16831683168316833	1	1	22890057	22930087
ENSG00000071082	ENSG00000071082	ENST00000409028_RPL31	P62899	2_101635538_C_T	rs13007048	7.795266104386693e-30	6.668177416553704e-33	11.0	4.154062466789297e-39	-1.0984177745436732	0.0002794305311481678	-0.19505550382236514	0.8098347985448868	-0.12878154037020373	0.7046170943494453	-0.025315459105802685	True	101635538,101609827,101612568,101613739,101622728,101623745,101629087,101629413,101629986,101629987,101631496,101634793,101641939,101644855,101646359		2_101634793_GTTCA_G;2_101629985_GGA_G;2_101629986_G_GTT;2_101629985_GGA_G;2_101629087_CAAA_C;2_101629087_CAA_C;		2_101622728_C_T;2_101635538_C_T;	2_101634793_GTTCA_G;2_101631496_G_A;2_101629987_A_T;2_101629986_GA_TT;2_101629985_GGA_G;2_101629986_G_T;2_101629986_GA_TT;2_101629986_G_GTT;2_101629985_GGA_G;2_101629413_C_G;2_101629087_CAAA_C;2_101629087_CAA_C;2_101623745_T_A;2_101622728_C_T;2_101635538_C_T;	2_101622728_C_T;		0.297029702970297	2	1	101618177	101640494
ENSG00000071127	ENSG00000071127	ENST00000508079_WDR1	O75083	4_10037628_T_C	rs10939665	0.01074870080738142	0.00020445821930975268	18.0	2.875640803210983e-08	-0.4131807003878996	0.9473432212068948	-0.004466854485893988	0.14941218474834447	-0.17939215938705644	0.0015258573605858876	-0.20905837223213555	False	10037628,9942577,9945296,9946132,9948564,9948829,9954660,9954918,9958719,9970962,9973660,9976105,9978142,9979279,9980462,9981294,9981625,9982191,9985398,9985710,9990328,9993772,9994583,9995376,9995851,9996996,9997534,9998213,9999398,9999539,9999877,10002195,10003395,10004743,10007305,10008305,10009151,10009917,10011321,10011345,10013173,10013202,10013291,10013378,10013463,10013861,10014642,100146…					4_10096020_C_T;4_10094931_G_A;4_10093299_T_C;4_10086015_T_C;			0.4504950495049505	4	-1	10075963	10118573
ENSG00000071189	ENSG00000071189	ENST00000409076_SNX13	Q9Y5W8-2	7_17827480_G_C	rs1997019	7.301445938853497e-05	1.2551569118417065e-06	13.0	8.550163030160094e-10	0.4187456795408448	0.6348903974084892	0.02434961401478201	0.26074707636502675	0.4201518870778809	0.6963991980636921	-0.04255360887245629	False	17827480,17817431,17818064,17819441,17819488,17819656,17819929,17820045,17820084,17820198,17820299,17821013,17821439,17821636,17822015,17822049,17822054,17822060,17822181,17822450,17823353,17823499,17823624,17824251,17824356,17824631,17824735,17824787,17824885,17824986,17825589,17825605,17825719,17825828,17825991,17826282,17826368,17826628,17827658,17827885,17829192,17829247,17830112,17831018,178…		7_17937558_A_ACTT;7_17927476_GA_G;7_17916667_T_TA;7_17916196_T_TA;7_17908129_AT_A;7_17890413_CA_C;7_17847462_C_CCTCCAGCAAA;		7_17854532_G_T;7_17831806_C_T;7_17831018_T_A;	7_17978212_T_C;7_17978129_C_T;7_17977054_T_C;7_17971224_T_C;7_17969900_G_A;7_17967791_C_T;7_17966152_C_A;7_17965579_G_A;7_17946604_A_G;7_17945259_A_T;7_17942597_T_C;7_17940152_T_C;7_17938283_C_T;7_17937558_A_ACTT;7_17936365_G_A;7_17927650_A_C;7_17927606_C_A;7_17927476_GA_G;7_17925975_A_G;7_17923744_T_C;7_17916667_T_TA;7_17916319_T_C;7_17916196_T_C;7_17916196_T_TA;7_17908130_T_A;7_17908129_AT_A;7_…	7_17978212_T_C;7_17978129_C_T;7_17977054_T_C;7_17971224_T_C;7_17969900_G_A;7_17967791_C_T;7_17966152_C_A;7_17965579_G_A;7_17946604_A_G;7_17945259_A_T;7_17942597_T_C;7_17940152_T_C;7_17938283_C_T;7_17937558_A_ACTT;7_17936365_G_A;7_17927650_A_C;7_17927606_C_A;7_17927476_GA_G;7_17925975_A_G;7_17923744_T_C;7_17916667_T_TA;7_17916319_T_C;7_17916196_T_C;7_17916196_T_TA;7_17908130_T_A;7_17908129_AT_A;7_…	7_17854532_G_T;	0.4900990099009901	7	-1	17830385	17980124
ENSG00000071242	ENSG00000071242	ENST00000503859_RPS6KA2	F2Z2J1	6_167269752_C_G		0.02173140598631302	0.0005745600584646224	14.0	3.7467985473456134e-07	-0.3793936189393037	0.5664532240842048	-0.04172828775269016	1.7730326551956257	-0.03815295200712798	0.03242586013163504	-0.25549498395948	False	167269752,167267792,167267977,167269159,167269448,167269749,167271139,167271460,167271716,167273603,167274847	6_167271716_T_C;	6_167274847_CTAA_C;6_167267977_AT_A;6_167267976_TA_T;			6_167274847_CTAA_C;6_167273603_G_T;6_167271716_T_C;6_167271460_G_T;6_167271139_G_A;6_167269749_G_A;6_167269448_G_A;6_167269159_T_A;6_167267977_AT_A;6_167267976_TA_T;6_167267792_C_T;6_167269752_C_G;			0.2549504950495049	6	-1	166822852	167319939
ENSG00000071462	ENSG00000071462	ENST00000430270_WBSCR22	O43709	7_73100487_G_C	rs11762191	0.09760367682494146	0.002305684301922623	19.0	1.3462116101122654e-17	0.3384375911556762	0.9070150523558392	0.005893899913501925	0.2479209024380407	0.2490927922015053	0.32088132169427064	0.08020263716513754	False	73100487,73092568,73122923					7_73100487_G_C;	7_73100487_G_C;		0.4405940594059406	7	1	73097355	73119491
ENSG00000071564	ENSG00000071564	ENST00000592628_TCF3	P15923	19_1579617_C_T	rs72989710	0.00012890567181138407	1.6681309190536606e-06	18.0	1.5023641491823045e-09	0.6152732554857525	0.6389965649386802	-0.02993729250173034	0.7731748919238226	0.2270796416487177	0.870726496260323	0.016971062682377358	True	1579617,1573686,1580334,1584309,1586932,1586988,1587458,1588611,1589064,1589107,1590583,1593238,1593540,1598203,1605543,1608061,1610362				19_1610362_C_T;	19_1610362_C_T;	19_1610362_C_T;		0.2425742574257425	19	-1	1609291	1652604
ENSG00000071626	ENSG00000071626	ENST00000336761_DAZAP1	K7EQ55	19_1683232_C_T	rs78840845	0.06785912473342726	0.0024031112058130705	12.0	9.78333211596333e-06	-0.4951074760610988	0.3368487046731107	-0.0612674511285736	0.10246780383146553	-0.2450294780196489	0.5572292791272935	-0.05635197604227615	False	1683232								0.21287128712871287	19	1	1407568	1435719
ENSG00000072041	ENSG00000072041	ENST00000309283_SLC6A15	Q9H2J7	12_85273385_G_A	rs2404236	0.008067096019261229	0.0002434410333585915	11.0	8.394205906596628e-08	0.455573457315128	0.06866869735391304	0.12110929374509025	0.4602198527262713	-0.13390565826116896	0.7722075575994147	0.04246436012151779	False	85273385,85268543,85271318,85276106,85277608,85281456,85282025,85287198,85294820,85295178,85298269,85300756,85309972,85313602,85316978,85325869,85329088,85330496,85339004		12_85282025_AGAGT_A;		12_85276106_C_T;	12_85300756_A_G;12_85298269_T_A;12_85295178_T_C;12_85294820_C_T;12_85287198_T_C;12_85282025_AGAGT_A;12_85281456_G_A;12_85277608_C_T;12_85276106_C_T;12_85271318_C_G;12_85268543_A_G;12_85273385_G_A;		12_85277608_C_T;	0.33663366336633666	12	-1	85253492	85307394
ENSG00000072110	ENSG00000072110	ENST00000556433_ACTN1	P12814-3	14_69444661_G_A	rs11628773	4.8589841635196035e-09	2.9065402463504037e-11	21.0	4.894026734914594e-27	0.9056854744642221	0.8765444660796944	-0.013966771823467223	1.7273437815882182	0.4704804667806466	0.6714956794219731	0.0008430015202463974	True	69444661,69436929,69437516,69437698,69441422,69443236,69444132,69450987,69451210,69453626,69455613,69458900			14_69444661_G_A;	14_69444132_G_A;	14_69444132_G_A;14_69443236_A_G;14_69441422_G_C;14_69437698_A_G;14_69437516_A_G;14_69436929_G_C;14_69444661_G_A;			0.08663366336633663	14	-1	69340860	69446157
ENSG00000072210	ENSG00000072210	ENST00000582991_ALDH3A2	P51648	17_19577018_A_G	rs11204408	1.0259795575113024e-22	1.1280496909419268e-25	23.0	7.632285290462556e-38	1.1927380264042742	0.2831295234209701	0.07409182178647454	0.604538149252032	0.10896385382116056	0.728828203485303	-0.026144017361100943	False	19577018,19494178,19494756,19495478,19498965,19499248,19502048,19502102,19503070,19504512,19504518,19505984,19506196,19512046,19517768,19518610,19518621,19519444,19521210,19521600,19521667,19525299,19526125,19527886,19529913,19533629,19534434,19537754,19538125,19543162,19543254,19544138,19545834,19547493,19549541,19552791,19553248,19553659,19559468,19561011,19563018,19565945,19568486,19570320,195…	17_19578873_A_T;	17_19576699_GT_G;17_19576668_TG_T;17_19568486_CT_C;17_19561011_GACTGAATT_G;17_19552791_CTTTCT_C;	17_19578873_A_T;	17_19580494_A_G;17_19578873_A_T;	17_19576699_GT_G;17_19576668_TG_T;17_19570320_A_G;17_19568486_CT_C;17_19565945_G_A;17_19563018_C_G;17_19561011_GACTGAATT_G;17_19559468_A_G;17_19553659_A_G;17_19553248_G_T;17_19552791_CTTTCT_C;17_19577018_A_G;	17_19580494_A_G;17_19578873_A_T;17_19576699_GT_G;17_19576668_TG_T;17_19570320_A_G;17_19568486_CT_C;17_19565945_G_A;17_19563018_C_G;17_19561011_GACTGAATT_G;17_19559468_A_G;17_19553659_A_G;17_19553248_G_T;17_19552791_CTTTCT_C;17_19577018_A_G;	17_19578873_A_T;	0.4900990099009901	17	1	19551449	19580911
ENSG00000072364	ENSG00000072364	ENST00000421773_AFF4	Q9UHB7	5_132139308_T_C	rs2652696	0.04587579383032707	0.002059428524101172	9.0	5.1346299918844125e-06	0.6993726925390136	0.5034350741488167	0.04049581570054198	2.1877985528953827	0.3307766367712295	0.9762993204573932	0.0039759219666608	True	132139308,132144898,132167542,132172048,132178571,132179445,132193555,132198287,132206504,132207357,132207860,132208686,132215477,132217338,132221231,132227677,132231439,132233230,132234152,132239181,132243460,132244129,132245193,132247585,132253579,132266725,132271269,132273441,132280314,132293420,132304222,132306035		5_132243460_CAT_C;		5_132227677_A_G;5_132215477_A_C;	5_132293420_T_A;5_132280314_G_A;5_132273441_C_T;5_132271269_C_G;5_132266725_C_T;5_132247585_A_G;5_132245193_T_C;5_132244129_T_C;5_132243460_CAT_C;5_132239181_C_T;5_132233230_T_C;5_132231439_T_C;5_132227677_A_G;5_132221231_G_A;5_132217338_C_A;			0.09405940594059406	5	-1	132211071	132299326
ENSG00000072571	ENSG00000072571	ENST00000358715_HMMR	O75330-2	5_162866664_A_G	rs2069345	1.0126512948332877e-13	9.111717719918433e-16	8.0	2.0370008533518766e-18	-1.38523388283866	0.04797982794051442	-0.30304796491158753	0.060316079896037475	-0.581607706961413	0.049642976360810685	-0.26991974748133396	True	162866664,162870038,162873013,162877073,162877412,162877645,162877697,162882629,162882838,162884393,162886563,162887648,162889878,162891644,162894654,162895807,162896162,162896250,162896324,162897089,162897366,162901156,162907990	5_162901156_G_A;	5_162895807_TC_T;		5_162887648_C_A;	5_162907990_G_C;5_162897366_A_T;5_162897089_A_G;5_162896324_C_T;5_162896250_G_A;5_162896162_A_G;5_162895807_TC_T;5_162894654_G_C;5_162891644_G_A;5_162889878_G_A;5_162887648_C_A;			0.0594059405940594	5	1	162887209	162918947
ENSG00000072682	ENSG00000072682	ENST00000360568_P4HA2	O15460-2	5_131573529_A_G	rs2089855	0.0006167151994262403	7.73389640261312e-06	21.0	9.047757917021696e-10	0.4703733786851815	0.4730438007322623	0.05225169073468011	0.8645054206178456	0.27441677869910497	0.6759689674201993	0.03351592045232521	False	131573529,131559199,131561372,131561758,131562900,131563501,131564501,131564636,131565961,131566941,131567924,131570896,131575338,131575932,131576737,131578637,131582356,131585958,131586598,131590387,131591725,131592405,131597005,131600187,131607300,131607402,131623358,131638324,131652529,131677047,131686146,131694077,131705458,131707429,131708877,131709032,131710399,131717050		5_131565961_CT_C;		5_131563501_C_G;5_131562900_C_T;	5_131623358_A_G;5_131607402_T_C;5_131607300_C_T;5_131600187_A_G;5_131597005_C_T;5_131592405_T_G;5_131591725_C_G;5_131590387_T_C;5_131586598_C_A;5_131585958_A_G;5_131582356_C_T;5_131578637_C_T;5_131576737_T_C;5_131575932_C_T;5_131575338_G_A;5_131570896_A_T;5_131567924_G_A;5_131566941_G_A;5_131565961_CT_C;5_131564636_C_T;5_131564501_C_T;5_131563501_C_G;5_131562900_C_T;5_131561758_C_T;5_131561372_C_…			0.448019801980198	5	-1	131527531	131631008
ENSG00000072756	ENSG00000072756	ENST00000339437_TRNT1	Q96Q11-2	3_3184925_A_G	rs334756	9.776818955729098e-05	2.033014974379285e-06	11.0	7.506503886454903e-10	0.7825042613633679	0.14180434988559848	0.1797351498957492	2.0415315813062547	0.21391747348625054	0.3996054539941855	0.11403595948421175	False	3184925,3181400,3184913,3184985,3187044,3188362,3189060,3189279,3190240,3220134,3220418				3_3190240_T_C;	3_3190240_T_C;3_3189060_G_A;3_3188362_A_G;3_3187044_A_G;3_3184985_A_G;3_3184913_C_T;3_3181400_T_C;3_3184925_A_G;	3_3190240_T_C;3_3189279_A_G;3_3189060_G_A;3_3188362_A_G;3_3187044_A_G;3_3184985_A_G;3_3184913_C_T;3_3181400_T_C;3_3184925_A_G;	3_3189279_A_G;	0.1831683168316832	3	1	3168600	3192563
ENSG00000072818	ENSG00000072818	ENST00000158762_ACAP1	Q15027	17_7234299_C_G	rs3809823	5.550339132166934e-10	5.1192553941906644e-12	12.0	1.5891938808623007e-19	-0.7355193830152356	7.857751581028061e-20	-0.7238981916663977	0.0003380074443040289	-0.6875979653036612	4.945592917704049e-07	-0.4629844358707407	True	7234299,7226957,7234112,7234983,7235316,7240391					17_7240391_C_T;			0.2599009900990099	17	1	7239848	7254797
ENSG00000072832	ENSG00000072832	ENST00000513911_CRMP1	Q14194	4_5804697_G_C	rs3821935	0.0093581540987367	0.0005250340514111275	6.0	2.9250353443516404e-09	-0.35175960242419874	0.2230026000096761	0.08525409986778576	0.0902657497151228	-0.2279810336445021	0.02675821704835453	-0.10189784005785896	True	5804697,5791775,5793175,5793329,5793842,5795710,5796380,5797374,5799463,5803669,5803904								0.3069306930693069	4	-1	5749811	5894785
ENSG00000072840	ENSG00000072840	ENST00000382674_EVC	P57679	4_5812195_A_G	rs2279250	0.007816317453986001	0.0004310221320093825	6.0	4.886822458617652e-08	-0.3822229883992983	0.0004495999872883457	-0.27122192848495746			0.7468263230253338	0.04478449585456512	False	5812195					4_5812195_A_G;			0.2995049504950495	4	1	5712924	5830772
ENSG00000072864	ENSG00000072864	ENST00000572756_NDE1	Q9NXR1-2	16_15813633_G_A	rs17284411	0.03156111921285271	0.0008167705956124813	15.0	1.2117955551339469e-06	0.3060335887923465	4.805615955616402e-06	0.2721470547101785	0.6693522223490538	0.20581984041514886	0.04679036811876527	0.1752007926488041	False	15813633,15757335,15794385,15813211,15813945,15818310,15834593,15837246				16_15818310_G_A;	16_15813945_C_T;16_15813211_G_T;16_15794385_C_T;16_15757335_G_A;16_15813633_G_A;	16_15757335_G_A;		0.4801980198019802	16	1	15737124	15820210
ENSG00000073008	ENSG00000073008	ENST00000344956_PVR	A0A0A0MSA9	19_45134110_A_C	rs846866	4.510294486830242e-07	1.1971572836132962e-08	6.0	3.570151179490472e-12	-0.6988824230055072	2.041601173805926e-13	-0.6387502195767049	0.06401438510253044	-0.09808741337475092	0.18011213453943928	0.1801868433901348	False	45134110,45110320,45113000,45119656,45120611,45124674,45126134,45126353,45126994,45131811,45132761,45134715,45136333,45141022,45141467,45144749,45146171,45148942,45160523,45162189,45167009	19_45162189_C_A;	19_45147476_GTGAGTGACCCCCGCGCAGTCCGGTGGCCCCTGTCTGGCTCCCGCTCCGCATCCAGGCCGGGTACTTGCCCCCTTGGGTTCCCGAAGATGACGGCCCCGCCGCGGCGCCACCCACCCCCCATCTCTGCCCCGGGGTTGGAAGGAACACGGTGCGAGGGTGCGAGGGCAGGACCCTCCTCTTGGCCACCCGGAGAGCGGTCGGAGTTGGGTACAGAAATTCCTCGAAATTGGCAGCAACACGGGTCGGGCACAAGACCCTCCTCTGGGCCCCTCGGAAAGGGGATGGAGTTGGGTGAGGAAATTTCCCAAAAAGGCAAGTGAATCCCGGAAAATCAGCAGATGGTGACGCATGCCGGATTACCTTACCCAGGTTCCTGCTCAGCATAC…	19_45147476_GTGAGTGACCCCCGCGCAGTCCGGTGGCCCCTGTCTGGCTCCCGCTCCGCATCCAGGCCGGGTACTTGCCCCCTTGGGTTCCCGAAGATGACGGCCCCGCCGCGGCGCCACCCACCCCCCATCTCTGCCCCGGGGTTGGAAGGAACACGGTGCGAGGGTGCGAGGGCAGGACCCTCCTCTTGGCCACCCGGAGAGCGGTCGGAGTTGGGTACAGAAATTCCTCGAAATTGGCAGCAACACGGGTCGGGCACAAGACCCTCCTCTGGGCCCCTCGGAAAGGGGATGGAGTTGGGTGAGGAAATTTCCCAAAAAGGCAAGTGAATCCCGGAAAATCAGCAGATGGTGACGCATGCCGGATTACCTTACCCAGGTTCCTGCTCAGCATAC…		19_45162189_C_A;19_45160523_G_A;19_45148942_C_T;19_45147476_GTGAGTGACCCCCGCGCAGTCCGGTGGCCCCTGTCTGGCTCCCGCTCCGCATCCAGGCCGGGTACTTGCCCCCTTGGGTTCCCGAAGATGACGGCCCCGCCGCGGCGCCACCCACCCCCCATCTCTGCCCCGGGGTTGGAAGGAACACGGTGCGAGGGTGCGAGGGCAGGACCCTCCTCTTGGCCACCCGGAGAGCGGTCGGAGTTGGGTACAGAAATTCCTCGAAATTGGCAGCAACACGGGTCGGGCACAAGACCCTCCTCTGGGCCCCTCGGAAAGGGGATGGAGTTGGGTGAGGAAATTTCCCAAAAAGGCAAGTGAATCCCGGAAAATCAGCAG…			0.16831683168316833	19	1	45147098	45166850
ENSG00000073050	ENSG00000073050	ENST00000595789_XRCC1	P18887	19_44079687_G_A	rs3213245	5.8342264206109866e-06	1.2184183878481346e-07	9.0	2.2635666038141385e-10	-0.5771291552398293	7.395773064781796e-05	-0.3994545930345379	0.06395347713830007	-0.6023487347898652	0.09471019974122166	-0.1585702202898065	True	44079687,44036339,44036417,44037328,44041425,44043448,44043918,44044193,44044886,44047550,44049077,44050195,44056052,44057227,44058098,44058239,44061415,44062486,44062807,44073794,44076154,44077507,44081059		19_44081059_G_GGCCG;19_44062486_CA_C;		19_44079687_G_A;	19_44081059_G_GGCCG;19_44077507_G_A;19_44076154_T_C;19_44073794_C_T;19_44062807_A_C;19_44062486_CA_C;19_44061415_T_C;19_44058239_C_T;19_44058098_T_C;19_44057227_T_A;19_44056052_A_G;19_44050195_C_T;19_44049077_G_A;19_44079687_G_A;	19_44062807_A_C;19_44062486_CA_C;19_44061415_T_C;19_44058239_C_T;19_44058098_T_C;19_44057227_T_A;19_44056052_A_G;	19_44057227_T_A;19_44047550_T_C;	0.3663366336633663	19	-1	44047192	44084625
ENSG00000073169	ENSG00000073169	ENST00000380903_	A0A087X0Q9	22_50634544_G_A	rs5771093	0.008144469010980895	0.0013554164563582267	2.0	1.804567652409388e-07	0.3508956612243193	1.95759357647398e-10	0.4290525328060112	0.02130830768723701	0.4978726626129635	0.37286108355020586	0.08514092538940299	False	50634544,50622214,50624909,50635332,50635627,50639059,50644177,50644969,50645321,50645650,50647375,50649560,50651839,50652866,50654428,50654888,50658274,50658570,50662037		22_50647201_GTGTTGAAGACACCCTCATTTTGGCCGGGGGACAAAGGCTTTTACCCAGCCTCCCCGCCCTTCTCTGAGCTCCCGCTCCTGTCCGCAAACCCCATCATGTGTGCTCGGGCCCTGGGACAAACCTGAAACTCCCCTGGGCTCCGTGGTGTTGGGGGCCCTGGGCGTGCTCTCCTACTGGTATCCCTGCAGGGCCAGCTTGGGGCGGGGGTGCGGGGTGGGAGCTGGCTTGGGTGGAAGGACCATGGGCTGGGCACCTCCCACGTGGGTCGATACGTCTTGATGCCCAGGGCAGCCAGCCGGGTCCTGACTGGGGAGATGCTGAGTGCCCACCTGGGGTCTGGGTCCCCGCCCCACGGACACCACAGACGTCCCACATGGCTTGATGGC…			22_50654888_G_C;22_50654428_T_G;22_50652866_T_C;22_50651839_G_A;22_50649560_C_G;22_50647375_C_T;22_50647201_GTGTTGAAGACACCCTCATTTTGGCCGGGGGACAAAGGCTTTTACCCAGCCTCCCCGCCCTTCTCTGAGCTCCCGCTCCTGTCCGCAAACCCCATCATGTGTGCTCGGGCCCTGGGACAAACCTGAAACTCCCCTGGGCTCCGTGGTGTTGGGGGCCCTGGGCGTGCTCTCCTACTGGTATCCCTGCAGGGCCAGCTTGGGGCGGGGGTGCGGGGTGGGAGCTGGCTTGGGTGGAAGGACCATGGGCTGGGCACCTCCCACGTGGGTCGATACGTCTTGATGCCCAGGGCA…			0.3589108910891089	22	1	50639408	50656045
ENSG00000073578	ENSG00000073578	ENST00000504309_SDHA	P31040	5_219549_A_G	rs6859848	0.0007672354911806683	1.0824262306087378e-05	19.0	1.2523155597948846e-31	0.6670198095877311	1.3996625917821969e-09	0.3732908569432465	6.1929222583312685e-28	0.453556649376549	0.013908401089145686	0.19849861790832168	True	219549,199415,200829,201594,201812,202194,202545,203151,203668,205360,205565,206618,206969,209038,215349,215841,216179,216319,216327,217199,217248,217640,217971,218036,218356,219138,219328,219396,220002,220433,220594,220614,220762,220817,220917,221490,221759,221916,221930,222057,222123,222411,222465,222494,222932,223072,223117,223214,223411,223807,223890,223909,223958,224105,224196,224207,224211,…	5_256509_G_A;	5_253701_AC_A;5_247087_T_TAATC;5_243467_TG_T;5_239419_C_CAT;5_234677_CT_C;5_231463_TCAGGAGTTCGAGAC_T;5_229229_A_AAG;5_223909_GATTTAA_G;5_221759_T_TA;5_220762_AG_A;	5_226160_A_C;	5_256509_G_A;	5_256038_G_T;5_255787_C_T;5_255622_T_A;5_254996_T_C;5_254035_T_C;5_253997_G_A;5_253952_A_G;5_253813_G_A;5_253701_AC_A;5_252995_T_G;5_252962_A_G;5_252704_T_C;5_252328_A_G;5_252255_T_C;5_252200_A_G;5_252166_T_A;5_252160_C_T;5_251784_C_T;5_251541_A_G;5_250922_A_C;5_250777_C_T;5_250776_G_T;5_250412_G_A;5_249941_T_C;5_249783_A_G;5_249663_G_A;5_249025_A_C;5_249007_C_T;5_248866_T_C;5_248715_T_C;5_248618…		5_251541_A_G;5_233734_C_G;5_228362_T_C;5_226160_A_C;5_224633_A_G;	0.150990099009901	5	1	218356	256815
ENSG00000073584	ENSG00000073584	ENST00000578112_SMARCE1	Q969G3-2	17_38770965_C_G	rs8074179	4.457973389780895e-30	1.917126841431265e-33	20.0	9.531702517755086e-41	-1.066507546710008	3.014766125926156e-38	-1.0464650757059475	0.3294225985773035	-0.3231479202352272	0.7409488807844304	-0.09814179550149604	True	38770965,38765366,38765666,38766020,38772965,38773947,38775805,38779942,38782343				17_38782343_G_A;				0.4900990099009901	17	-1	38781214	38804760
ENSG00000073712	ENSG00000073712	ENST00000554152_FERMT2	Q96AC1	14_53321340_G_A	rs62003515	0.0003649028129675058	6.582033970504713e-06	14.0	1.133408986376696e-08	0.5451222197384124	0.03717883058549399	0.1735067380505364	2.0912201703710585	0.3687250109266875	0.3125705885783843	0.09476323131778663	False	53321340,53309940,53313097,53316867,53321246,53321273,53330007,53330720,53331679,53333116,53348540,53357111,53365952,53366323,53366439,53366923,53367088,53367793,53368082,53368232,53368804,53372330,53375241,53375302,53378246,53378360,53379925,53380014,53386172,53387109	14_53348540_T_G;	14_53386172_A_ATAAT;14_53367088_T_TACATATAAA;			14_53387109_T_G;14_53386172_A_ATAAT;14_53380014_A_G;14_53379925_T_C;14_53378360_T_C;14_53378246_A_G;14_53375302_C_A;14_53375241_A_G;14_53372330_T_C;14_53368804_C_T;14_53368232_C_T;14_53368082_G_T;14_53367793_G_A;14_53367088_T_TACATATAAA;14_53367088_T_A;14_53366923_A_G;14_53366439_G_T;14_53366323_T_C;14_53365952_T_C;14_53357111_G_A;14_53348540_T_G;14_53333116_C_G;14_53331679_T_C;14_53330720_A_G;14…	14_53387109_T_G;14_53386172_A_ATAAT;14_53380014_A_G;14_53379925_T_C;14_53378360_T_C;14_53378246_A_G;14_53375302_C_A;14_53375241_A_G;14_53372330_T_C;14_53368804_C_T;14_53368232_C_T;14_53368082_G_T;14_53367793_G_A;14_53367088_T_TACATATAAA;14_53367088_T_A;14_53366923_A_G;14_53366439_G_T;14_53366323_T_C;14_53365952_T_C;		0.1707920792079208	14	-1	53323986	53419153
ENSG00000073849	ENSG00000073849	ENST00000485105_ST6GAL1	P15907	3_186712963_A_G	rs16848727	4.652176808416514e-10	2.31807958846271e-12	22.0	3.6465391546510386e-16	0.7358506592339802	0.3729582435006912	-0.058624426184560326	0.2226772501357488	0.1171263719417297	0.1015966558303743	-0.17995083973672615	False	186712963,186712736,186712738,186712749,186713103,186713289,186713556,186715319,186718745,186720957,186721290,186722362,186722848,186723975,186725887,186727170		3_186721290_CT_C;3_186720957_A_AAAACC;3_186712738_A_AAC;3_186712736_C_CA;			3_186727170_C_A;3_186725887_G_A;3_186723975_C_A;3_186722362_T_C;3_186721290_CT_C;3_186720957_A_AAAACC;3_186718745_A_C;3_186715319_G_A;3_186713556_C_T;3_186713289_A_G;3_186713103_T_C;3_186712749_G_T;3_186712738_A_AAC;3_186712736_C_CA;3_186712963_A_G;			0.2722772277227723	3	1	186648274	186796341
ENSG00000073910	ENSG00000073910	ENST00000380250_FRY	Q5TBA9	13_32588825_G_A	rs455805	0.04771328542325692	0.0027667195617108514	7.0	2.21135784629361e-06	0.4591677949222496	3.903079878447018e-06	0.5130666532757735	0.5417420408791571	-0.20185223097674515	0.24114563733163025	0.2111601943161221	False	32588825,32563113,32566930,32567494,32569352,32570713,32571088,32574156,32575365,32583353,32590165,32590761								0.1113861386138614	13	1	32605437	32870794
ENSG00000073921	ENSG00000073921	ENST00000528411_PICALM	H0YEF7	11_85857232_A_T	rs56369637	3.7065350712400254e-05	3.427027609259185e-07	23.0	4.709506800115527e-10	-1.091045923514162	8.893982770645241e-07	0.7847225925300743	0.3221148316431599	-0.24618400314158384	0.18590224179303447	0.3320829587592027	False	85857232,85614229,85643786,85674478,85681963,85704592,85729674,85734547,85736624,85749243,85781523,85786032,85791647,85792007,85792190,85794509,85795555,85796114,85797289,85797775,85809387,85826002,85828857,85831516,85851280,85851458,85852057					11_85749243_T_G;11_85736624_A_T;11_85734547_G_A;11_85729674_G_A;11_85704592_G_A;11_85681963_G_C;11_85674478_A_G;	11_85749243_T_G;11_85736624_A_T;11_85734547_G_A;11_85729674_G_A;		0.0594059405940594	11	-1	85668727	85780924
ENSG00000073969	ENSG00000073969	ENST00000398238_NSF	I3L0N3	17_44764775_A_C	rs199460	1.0212461286305634e-06	1.9045430167487568e-08	9.0	4.6341591302661036e-11	0.4907217388619674	1.653139023397088e-10	0.5408622620200427	0.05015120048699211	0.30232746554074336	6.676172271897911e-07	0.5377541729083855	False	44764775					17_44764775_A_C;			0.2277227722772277	17	1	44668035	44834830
ENSG00000074071	ENSG00000074071	ENST00000569585_MRPS34	C9JJ19	16_1825768_A_C	rs2745169	3.3062911980245245e-10	1.1731331977621715e-11	3.0	7.692490239928058e-22	-0.8313920984468025	0.15403350633962393	-0.08853706724173999	0.054637578764290685	-0.2632265714938431	0.012308574607790659	-0.20531814154705952	False	1825768,1815946,1817431,1819433,1822797,1826302,1830551,1834724,1835231,1836796,1839377,1843331,1844561,1845144,1846211		16_1822797_C_CACCT;	16_1822797_C_CACCT;16_1822797_C_T;		16_1822797_C_T;			0.457920792079208	16	-1	1821891	1823156
ENSG00000074181	ENSG00000074181	ENST00000601011_NOTCH3	Q9UM47	19_15295134_G_A	rs1043996	6.334708707606529e-15	6.569161974288117e-17	6.0	3.2353538843047164e-24	0.8291153096846664	0.4831791884666843	-0.02990558580791723	0.0418817662639977	0.535266481788018	0.2131737892646764	0.14762215253153774	False	15295134,15287961,15289613,15290125,15290412,15292271,15294802,15299648,15301279,15301796,15301850,15307355		19_15301849_TA_T;			19_15307355_T_G;19_15301849_TA_T;19_15301796_T_C;19_15301279_G_T;19_15299648_T_C;19_15294802_G_A;19_15292271_C_T;19_15290412_G_A;19_15290125_G_A;19_15289613_A_T;19_15287961_G_A;19_15295134_G_A;		19_15295134_G_A;	0.3292079207920792	19	-1	15270444	15311792
ENSG00000074201	ENSG00000074201	ENST00000533957_CLNS1A	P54105	11_77270442_G_A	rs150702313	0.004706514975289886	0.00012365750754683567	12.0	2.1884501310066327e-07	-0.6255558629786444	0.04045772386621163	0.24009116051578944	0.7177229750869539	-0.3966270728094319	0.7150641298649767	0.043069246632084994	True	77270442,77297159,77477036,77517973,77629861,77685935		11_77297159_CTGAG_C;			11_77297159_CTGAG_C;11_77270442_G_A;	11_77297159_CTGAG_C;11_77270442_G_A;		0.09405940594059406	11	-1	77225981	77348850
ENSG00000074266	ENSG00000074266	ENST00000533228_EED	O75530	11_85937613_T_A	rs7120070	9.810010853340893e-18	4.069934572716865e-20	11.0	1.8602427354360502e-21	0.8851068283879033	0.5031881903964731	0.05767342063238104	2.2893997472375003	0.3850370291275769	0.19548226086398435	-0.120148662740168	True	85937613,85939947,85941864,85946709,85947751,85949718,85958387,85959364,85959670,85961166,85963619,85963632,85964627,85964887,85965938,85966542,85966575,85966586,85966665,85967064,85967709,85968037,85969585,85970434,85972478,85972939,85975481,85978000,85978664,85978734,85979010,85979270,85980073,85992009,86003498,86011256		11_85975481_A_AATTT;			11_85980073_C_T;11_85979270_T_G;11_85979010_G_C;11_85978734_G_C;11_85978664_C_T;11_85978000_C_T;11_85975481_A_T;11_85975481_A_AATTT;11_85972939_T_C;11_85972478_C_T;11_85969585_C_T;11_85968037_C_T;11_85967709_G_A;11_85967064_A_G;11_85966665_C_G;11_85966586_T_C;11_85966575_G_A;11_85966542_A_C;11_85965938_C_T;11_85964887_C_T;11_85964627_C_T;11_85963632_T_C;11_85963619_C_T;11_85961166_C_T;11_85959670…			0.4282178217821782	11	1	85955586	85989855
ENSG00000074370	ENSG00000074370	ENST00000576957_ATP2A3	Q93084-4	17_3846675_C_T	rs71366582	0.0012372099865863074	2.162789158508468e-05	16.0	6.071993378310818e-10	0.7385337283427282	0.3156578056316125	-0.07364913293423303	0.02139805109771109	0.8882962445369988	0.24115903700075714	-0.13141035380036414	False	3846675,3839685,3839829,3839874,3840115,3840116,3840540,3840553,3840632,3840686,3840694,3840928,3841566,3842247,3842491,3843292,3844671,3845223,3846891,3848202,3852881,3853414,3853549		17_3848202_GC_G;17_3846891_TG_T;17_3842247_A_AG;17_3840694_GA_G;	17_3840928_A_G;		17_3853549_G_A;17_3853414_C_G;17_3852881_C_T;17_3848202_GC_G;17_3846891_TGCCCCTGC_TCCCCTGA;17_3846891_TG_T;17_3845223_C_A;17_3844671_G_A;17_3843292_G_A;17_3842491_G_A;17_3842247_A_AG;17_3841566_G_A;17_3840694_GA_G;17_3840686_A_C;17_3840632_C_T;17_3840553_C_T;17_3840540_C_T;17_3840116_G_A;17_3840115_GG_CA;17_3840115_GG_CA;17_3840115_G_C;17_3846675_C_T;		17_3840928_A_G;	0.17574257425742573	17	-1	3827169	3867736
ENSG00000074582	ENSG00000074582	ENST00000439945_BCS1L	Q9Y276	2_219357743_T_A	rs188764949	0.000655918527901183	8.675375024992708e-06	20.0	4.748920138439836e-08	1.1894378428906165	0.4836676892007498	-0.08884477837178947	0.052205773219976784	-0.2385744501270449	0.04694995461417952	-0.4226545656305492	False	219357743,219292595,219305195,219311933,219312106,219320528,219321707,219322757,219325259,219325662,219326301,219331501,219332233,219332503,219337181,219341905,219345601,219351891,219353649,219354952,219355854,219357056,219362985,219363188,219363257,219363954,219368229,219369736,219371259,219371559,219372781,219373064,219375664,219377269,219381508,219383526,219383691,219384491,219385526,219387724…	2_219527712_C_G;			2_219525007_G_A;	2_219527866_T_C;2_219526739_C_T;2_219525007_G_A;2_219524306_G_A;2_219524089_C_T;		2_219527866_T_C;2_219527712_C_G;	0.056930693069306926	2	1	219523487	219528166
ENSG00000075131	ENSG00000075131	ENST00000561773_TIPIN	Q9BVW5	15_66627205_G_C	rs62625687	6.910829230368892e-05	2.1917998756067644e-06	7.0	7.534024678868403e-10	-0.8067566781019049	0.2728617027593828	-0.09399764311001108	2.1880254615084724	-0.1522871909037039	0.841571472119578	0.02706793375072225	False	66627205,66587187,66642282,66644563,66649751,66654474,66656218,66657391,66678919,66684390,66712806,66724350,66750094,66750615,66760342,66786522,66788803,66791258,66808968,66826074,66827989,66829028,66830064,66830542,66830968,66831310,66831969,66832191,66834305,66836295		15_66642282_GGTTTTTTTT_G;		15_66678919_A_C;	15_66678919_A_C;15_66657391_A_T;15_66656218_G_A;15_66654474_T_C;15_66649751_G_C;15_66644563_G_A;15_66642282_GGTTTTTTTT_G;			0.14603960396039606	15	-1	66628544	66679084
ENSG00000075234	ENSG00000075234	ENST00000381031_TTC38	Q5R3I4	22_46646019_C_G	rs113658408	1.1020590073801188e-08	2.066568962321828e-10	7.0	1.2524926010233473e-15	-0.9004387271708922	4.155462572286779e-15	-0.9121946550698744	3.784286714032648e-05	-0.8775625478215483	0.0002525619346634377	-0.553483086413908	False	46646019,46646063,46647429,46647844,46648794,46649344,46649421,46651623,46651982,46655779,46659186,46660014,46660170,46660367,46662497,46663678,46671507,46677298,46679619,46680696,46682310,46682955,46682976,46684528,46684706,46684890,46685131,46685274,46685380,46685563,46686115,46686328,46689468,46690005,46690321,46690340,46690460,46690824,46691936,46693078,46698390,46701991,46702449,46702586,467…	22_46682976_C_T;			22_46689468_G_A;	22_46686328_C_G;22_46686115_T_G;22_46685563_G_A;22_46685274_T_C;22_46685131_A_G;22_46684890_A_G;22_46684706_C_G;22_46684528_C_T;22_46682955_C_T;22_46682310_C_G;22_46680696_G_A;22_46679619_C_T;22_46677298_G_A;22_46671507_C_T;	22_46686328_C_G;22_46686115_T_G;22_46685563_G_A;22_46685380_C_T;22_46685274_T_C;22_46685131_A_G;22_46684890_A_G;22_46684706_C_G;22_46684528_C_T;22_46679619_C_T;22_46677298_G_A;22_46671507_C_T;	22_46685380_C_T;	0.10148514851485148	22	1	46663858	46689905
ENSG00000075239	ENSG00000075239	ENST00000265838_ACAT1	P24752	11_108164646_A_G		7.937355176872873e-06	1.2634541683566167e-07	12.0	7.983631380051711e-12	-0.4589217273719631	6.75418832236245e-09	-0.4199811806110579	0.0003849825511852572	-0.4004483220374268	2.78228386732787e-06	-0.4564441169707655	False	108164646								0.4554455445544554	11	1	107992243	108018503
ENSG00000075240	ENSG00000075240	ENST00000361034_GRAMD4	Q6IC98	22_46973214_T_C	rs117095143	4.2572035976053173e-07	9.63546937859052e-09	7.0	1.1146818442159302e-14	0.5089551570114729	2.3416334493197005e-16	0.5714790674409009	0.025338851047325976	0.3821225122655576	0.016018723127297112	0.19839391540277945	False	46973214,46958507,46961629,46964721,46965493,46966536,46967630,46967634,46971294,46971620,46972080,46972152,46972284,46972832,46973347,46974203,46974717,46977702		22_46972284_T_TC;			22_46977702_C_T;22_46974717_G_C;22_46974203_G_A;22_46973347_C_T;22_46972832_G_C;22_46972284_T_TC;22_46972152_G_A;22_46972080_G_A;22_46973214_T_C;			0.21287128712871287	22	1	46971909	47075688
ENSG00000075336	ENSG00000075336	ENST00000579071_TIMM21	Q9BVV7	18_71757235_C_G	rs113415829	0.0214250231255279	0.0013192189609755182	6.0	1.9660472080268717e-06	-0.4822624907651102	0.8427672423819166	-0.012099471556441971	0.023800024015032555	-0.3524387978094756	0.11298421209476235	0.1766509158215662	True	71757235,71743417,71784930,71820092					18_71820092_T_C;			0.2376237623762376	18	1	71815746	71826197
ENSG00000075340	ENSG00000075340	ENST00000407644_ADD2	P35612	2_70888892_G_C	rs3821258	1.738612454566138e-08	1.67101240718458e-10	14.0	4.525141765036727e-18	-0.6992883325222544	9.100212781103246e-05	-0.21058632929255267	0.6332373273045045	-0.4030555996938748	0.011571188108410502	-0.2891399231135623	True	70888892,70887166,70889257,70889611,70891515,70894858		2_70894858_GT_G;		2_70889611_C_T;2_70889257_G_T;2_70887166_T_C;2_70888892_G_C;	2_70894858_GT_G;2_70891515_C_T;2_70889611_C_T;2_70889257_G_T;2_70887166_T_C;2_70888892_G_C;	2_70894858_GT_G;2_70891515_C_T;2_70889611_C_T;2_70889257_G_T;2_70887166_T_C;2_70888892_G_C;		0.1806930693069307	2	-1	70834750	70995357
ENSG00000075568	ENSG00000075568	ENST00000186436_TMEM131	Q92545	2_98377665_G_A	rs6760008	3.393937853024612e-07	5.277329853797385e-09	10.0	2.9497597802137495e-14	0.28192212835054065	1.131608320150246e-11	0.3200890771312951	0.9594269726423066	0.13360243213964207	0.3084625891830555	-0.10441099901792583	False	98377665,98372281,98372980,98379661,98383893,98384867,98397811,98398214,98402267,98403683,98424074,98424286,98436017,98441362,98443694,98451036,98451717,98457656,98459556,98459994,98469415,98478680,98493179,98497705,98498001,98501075,98504194,98512340,98534065,98540460,98554824,98561347,98575531,98604613,98605983,98622697,98624544,98626286		2_98605983_TGAA_T;2_98504194_AT_A;2_98497705_CT_C;2_98459556_TGTAAA_T;2_98451036_TA_T;2_98379661_TCA_T;		2_98372980_A_G;	2_98605983_TGAA_T;2_98604613_C_T;2_98575531_T_C;2_98561347_C_T;2_98554824_A_C;2_98540460_G_A;2_98534065_C_T;2_98512340_C_T;2_98504194_AT_A;2_98501075_G_C;2_98498001_C_T;2_98497705_CT_C;2_98493179_C_G;2_98478680_C_G;2_98469415_A_G;2_98459994_G_A;2_98459556_TGTAAA_T;2_98457656_G_A;2_98451717_T_C;2_98451036_TA_T;2_98443694_C_T;2_98441362_A_T;2_98436017_G_A;2_98424286_G_T;2_98424074_C_A;2_98403683_C_…	2_98605983_TGAA_T;2_98604613_C_T;2_98575531_T_C;2_98561347_C_T;2_98554824_A_C;2_98540460_G_A;2_98534065_C_T;2_98512340_C_T;2_98504194_AT_A;2_98501075_G_C;2_98498001_C_T;2_98497705_CT_C;2_98493179_C_G;2_98478680_C_G;2_98469415_A_G;2_98459994_G_A;2_98459556_TGTAAA_T;2_98457656_G_A;2_98451717_T_C;2_98451036_TA_T;2_98443694_C_T;2_98441362_A_T;2_98436017_G_A;		0.32673267326732675	2	-1	98372799	98612388
ENSG00000075624	ENSG00000075624	ENST00000443528_ACTB	C9JUM1	7_5602200_G_C	rs852526	2.0633610666677885e-06	2.7984168783227605e-08	13.0	7.387062318587923e-15	0.8860322370685422	0.12314348205153827	-0.11655950877944116	0.5783427588739207	0.19303458819917235	0.2619090256700961	0.2234294158051572	False	5602200			7_5602200_G_C;		7_5602200_G_C;			0.32673267326732675	7	-1	5566782	5603415
ENSG00000075643	ENSG00000075643	ENST00000261326_MOCOS	Q96EN8	18_33783528_T_C	rs77919175	6.157349487472368e-05	6.7714911441856785e-06	2.0	5.838065173107407e-09	0.5928056405266964	4.7419123937982e-09	0.6122492847055956	0.12264983896991664	0.5889368013055469	0.4861675470499105	0.09923697403434373	False	33783528,33791804					18_33791804_G_A;18_33783528_T_C;			0.1485148514851485	18	1	33767482	33852120
ENSG00000075856	ENSG00000075856	ENST00000547397_SART3	F8VV04	12_108914419_G_A	rs7969198	2.4995869057372273e-08	2.133336566073366e-10	16.0	3.9688366912320883e-13	0.7772226794574495	0.10210550660871093	0.11371700524682984	1.0911548655820944	0.33419825893064825	1.3077793692042217	0.055667917128042636	False	108914419,108916677,108918146,108918431,108919674,108920606,108920949,108923386,108923561,108923950,108924510,108924749,108925762,108927483,108929450,108930109,108930831,108930975,108932053,108932100,108932479,108932916,108933931,108934180,108934349,108935557,108935730,108936516,108936519,108937929,108938750,108940958,108941447,108942116,108942550,108943028,108944245,108944497,108944552,108945921…	12_108954823_C_G;	12_108949876_CT_C;12_108946248_TA_T;12_108934349_TA_T;		12_108954502_G_A;12_108923950_A_G;12_108918146_C_T;12_108916677_T_G;	12_108954502_G_A;12_108953729_C_T;12_108953556_C_T;12_108952532_A_G;12_108951951_T_A;12_108951916_A_C;12_108951887_G_C;12_108951814_G_T;12_108951757_T_C;12_108951640_A_T;12_108951515_C_T;12_108950947_G_A;12_108950726_G_A;12_108949876_CT_C;12_108949739_T_C;12_108949596_T_C;12_108949259_G_T;12_108946248_TA_T;12_108945921_G_C;12_108944552_T_C;12_108944497_G_A;12_108944245_G_C;12_108943028_G_A;12_108…	12_108954823_C_G;12_108954502_G_A;12_108953729_C_T;12_108953556_C_T;12_108952532_A_G;12_108951951_T_A;12_108951916_A_C;12_108951887_G_C;12_108951814_G_T;12_108951757_T_C;12_108951640_A_T;12_108951515_C_T;12_108950947_G_A;12_108950726_G_A;12_108949876_CT_C;12_108949739_T_C;12_108949596_T_C;12_108949259_G_T;12_108946248_TA_T;12_108945921_G_C;12_108944552_T_C;12_108944497_G_A;12_108944245_G_C;12_108…	12_108954823_C_G;12_108923950_A_G;12_108918146_C_T;	0.19801980198019808	12	-1	108916357	108955176
ENSG00000075914	ENSG00000075914	ENST00000265564_EXOSC7	Q15024	3_45036539_C_T	rs112446948	2.059492504538641e-08	2.539076214936649e-10	11.0	2.8920202957977677e-17	1.260439733629634	8.121702931295698e-16	0.9096966069687707	0.4609595973928163	0.2536065878392604	0.1385527970487276	0.2687671561000746	True	45036539,45040461,45040889,45048807,45053671					3_45048807_T_C;3_45040889_G_T;3_45040461_G_A;3_45036539_C_T;			0.061881188118811874	3	1	45016733	45077558
ENSG00000075975	ENSG00000075975	ENST00000170447_MKRN2	C9J494	3_12514569_G_A	rs709163	0.000455366285491584	3.900946184423708e-05	3.0	3.866290188142397e-09	-0.4402266102259644	1.6686099242819405e-07	-0.35575083885231623	0.3326270636566742	-0.4022827613404107	0.7103878112513234	0.03573681433945697	False	12514569,12513246								0.2673267326732673	3	1	12598513	12625212
ENSG00000076053	ENSG00000076053	ENST00000540163_RBM7	Q9Y580	11_114277804_T_C	rs678207	0.000480711939189256	1.5513448402146802e-05	8.0	1.0438903360316557e-09	0.3608276904783685	0.008141691683639153	0.14139763446728776	1.5074226416484118	0.1437128746001603	0.11333248126110206	0.1387097403518074	False	114277804,114275073,114280741,114282267,114287616,114289195,114291607				11_114282267_C_T;11_114280741_C_G;11_114277804_T_C;	11_114282267_C_T;11_114280741_C_G;11_114275073_A_G;11_114277804_T_C;	11_114275073_A_G;11_114277804_T_C;		0.4826732673267327	11	1	114270752	114284925
ENSG00000076650	ENSG00000076650	ENST00000170564_GPATCH1	Q9BRR8	19_33567337_C_G	rs34370648	9.104483114724e-09	2.955583791653522e-10	4.0	1.8713899404936783e-18	0.8451900835878907	8.07232450424533e-20	0.9372849658811993	3.927528736283873e-05	1.0310073302824794	0.0014386940137376195	0.406577003120913	True	33567337,33540687,33541734,33542657,33544041,33545042,33545881,33546639,33548203,33559874,33562145,33562695,33562757,33567565,33569500,33569747,33570554,33570763,33571006,33571972,33572089,33572856,33573924,33574012,33574129,33579301,33595390,33597495,33602757,33603288,33604175,33605912,33612474,33613610,33614648,33617963,33620108,33620488,33620897,33623604		19_33603288_AC_A;19_33574012_TG_T;		19_33572089_G_C;19_33571972_G_A;	19_33620897_G_A;19_33620488_T_A;19_33620108_G_A;19_33617963_C_T;19_33613610_G_A;19_33612474_C_T;19_33605912_C_A;19_33604175_C_T;19_33603288_AC_A;19_33597495_C_G;19_33595390_A_G;19_33579301_A_C;19_33574129_G_C;19_33574012_TG_T;19_33573924_C_T;19_33572856_C_T;	19_33597495_C_G;19_33595390_A_G;19_33579301_A_C;19_33574129_G_C;19_33574012_TG_T;19_33573924_C_T;19_33572856_C_T;19_33572089_G_C;19_33571972_G_A;	19_33602757_C_T;	0.15594059405940594	19	1	33571786	33621448
ENSG00000076924	ENSG00000076924	ENST00000358368_XAB2	Q9HCS7	19_7675369_C_T	rs62113420	0.06538818056729477	0.005534384231501449	5.0	4.262006472708362e-06	-0.6276550505419216	3.1685587095695695e-14	-0.6954739765758422	0.3954294497475428	-0.5747630576649603	0.8786758751107717	0.017200310216967996	True	7675369,7672046,7678412,7679351,7679357,7679398,7679461,7680873,7681134,7681267,7681910,7682030,7685981,7686282,7686647,7687626,7687908,7688039,7688614,7688838,7689729,7691001,7691465,7691949,7692076,7692083,7693528,7693751,7693814,7712161		19_7693528_A_AGCCTCTG;	19_7688614_T_C;		19_7693814_G_A;19_7693751_A_G;19_7693528_A_AGCCTCTG;19_7692083_G_A;19_7692076_T_C;19_7691949_A_G;19_7691465_G_A;19_7691001_G_C;19_7689729_T_C;19_7688838_A_G;19_7688614_T_C;19_7688039_C_T;19_7687908_A_G;19_7687626_C_G;19_7686647_C_T;19_7686282_A_T;19_7685981_G_A;			0.14108910891089108	19	-1	7684411	7694451
ENSG00000077147	ENSG00000077147	ENST00000485093_TM9SF3	Q9HD45	10_98274045_G_A		2.3943055249789466e-15	2.3702742298172357e-17	6.0	9.252348703524939e-26	1.007185954549528	0.5582256935506571	-0.03024937006005539	0.14485408221198998	0.1515680449849537	0.7037030747668807	0.03134180749341553	False	98274045,98280365,98281483,98287261,98289250,98291153,98293392,98303396,98313063,98317304,98319016,98319236,98319367,98319503,98321010,98323591,98327266,98332823,98334182,98340847,98341555,98341583,98343748,98344876,98347504,98347993,98353213,98355870,98359014,98359623,98367218,98369256,98371061,98371084,98371147,98371512,98371748,98374426,98374601,98375000,98375678,98375785,98377940,98378250,983…		10_98343748_GC_G;10_98343747_TG_T;10_98321010_TA_T;10_98281483_GA_G;10_98280365_GAAA_G;10_98280363_TAGA_T;	10_98287261_G_C;	10_98281483_GA_G;10_98280365_GAAA_G;10_98280363_TAGA_T;	10_98344876_G_C;10_98343748_GC_G;10_98343747_TG_T;10_98341583_G_C;10_98341555_T_C;10_98340847_T_C;10_98334182_C_T;10_98332823_A_G;10_98327266_T_C;10_98323591_T_G;10_98321010_T_A;10_98321010_TA_T;10_98319503_A_T;10_98319367_A_T;10_98319236_G_T;10_98319016_G_C;10_98317304_G_C;10_98313063_A_C;10_98303396_A_G;10_98293392_G_C;10_98289250_A_C;10_98287261_G_C;			0.3217821782178218	10	-1	98277866	98347209
ENSG00000077152	ENSG00000077152	ENST00000487227_UBE2T	Q9NPD8	1_202374181_T_C	rs1852643	4.431424207214173e-08	2.067511490074832e-09	3.0	1.865181340699596e-11	1.0326245897660813	0.7042961164851576	0.03838866978925095	0.5718780123389139	0.14283630766828614	0.9872747368834576	-0.002222429234107537	False	202374181,202302232					1_202302232_A_G;			0.09653465346534654	1	-1	202300785	202311108
ENSG00000077348	ENSG00000077348	ENST00000221233_EXOSC5	Q9NQT4	19_41697653_G_A	rs35599780	0.010904021665584587	0.0007492507006627283	5.0	6.86582566514669e-07	0.5933006888553723	2.0628010548540817e-06	0.40795303788618825	0.08900383794459922	0.34168640629807223	0.1780847657500555	0.22055462463922024	True	41697653,41693898								0.10643564356435643	19	-1	41892279	41903384
ENSG00000077380	ENSG00000077380	ENST00000409453_DYNC1I2	Q13409-2	2_172588865_C_G	rs10204501	3.482464950148687e-18	5.2857185166336085e-21	28.0	1.7953806266908214e-29	-1.1950951976248645	3.593303580842622e-27	-0.7244459155507809	8.794854571593552e-06	-0.6218051522059707	7.061560803805777e-06	-0.306513271490898	False	172588865,172530949,172532392,172533305,172534884,172535337,172535848,172537350,172541609,172542705,172543913,172544483,172549248,172549630,172552343,172552765,172558172,172559926,172560729,172563922,172564021,172567225,172567713,172569134,172569587,172573341,172574612,172575012,172575186,172577116,172577276,172579954,172582111,172585595,172585885,172586651,172588094,172588866,172588982,172590277…		2_172594315_AT_A;2_172590277_TG_T;2_172590276_TTG_T;2_172585357_GCAGGTAAACCTAAACTGGAATTTGCAATAATTTAAAATTCCTCCTTTAATCCCATTGAAACAAATTGTCTTATTTAAGTAGAAATCTGTCGTAGATCTACTTGTTATTTGTGACAGATTTTTTGTGTTCAGGCACATAAAATTAAAACTTAATACCTTTTTGTATAAAAGATAATTTTGGATTCATGATGTGTTTAGATTTTGTGGGTTGTGGTTTTGTGTGTGTGCATGTACTCACGTAAGTTAGTGATAGGCAGGAACATTCAGTAGTTACAAATACAATATGCACATGCCAATATTGACCTATAGACTTATAAATGAGATTTTCAGCTGTT…	2_172585357_GCAGGTAAACCTAAACTGGAATTTGCAATAATTTAAAATTCCTCCTTTAATCCCATTGAAACAAATTGTCTTATTTAAGTAGAAATCTGTCGTAGATCTACTTGTTATTTGTGACAGATTTTTTGTGTTCAGGCACATAAAATTAAAACTTAATACCTTTTTGTATAAAAGATAATTTTGGATTCATGATGTGTTTAGATTTTGTGGGTTGTGGTTTTGTGTGTGTGCATGTACTCACGTAAGTTAGTGATAGGCAGGAACATTCAGTAGTTACAAATACAATATGCACATGCCAATATTGACCTATAGACTTATAAATGAGATTTTCAGCTGTTTCCCCTTTTGATTTATTTGGACTTTAAGCATTAGTTCATTCTCCTGATAATT…	2_172544483_A_G;	2_172599615_T_C;2_172598592_A_G;2_172597929_G_A;2_172596308_T_C;2_172596078_G_C;2_172594315_AT_A;2_172594197_T_C;2_172591963_A_G;2_172591944_T_C;2_172590277_TG_T;2_172590276_TTG_T;2_172588982_C_T;2_172588866_C_G;2_172588865_CC_GG;2_172588094_G_A;2_172586651_C_G;2_172585885_T_G;2_172585357_GCAGGTAAACCTAAACTGGAATTTGCAATAATTTAAAATTCCTCCTTTAATCCCATTGAAACAAATTGTCTTATTTAAGTAGAAATCTGTCGTAGATCTACTTGTTATT…	2_172582111_TTTTT_TTTTTT;2_172582111_T_TG;2_172579954_A_G;2_172577276_A_T;2_172577116_T_C;2_172575186_G_A;2_172575012_T_C;2_172574612_G_A;2_172573341_G_A;2_172569587_G_C;2_172569134_AT_A;2_172567713_G_A;2_172567225_T_C;2_172564021_A_T;2_172563922_G_A;2_172560729_A_C;2_172559926_CAG_C;2_172558172_G_T;2_172552765_A_T;2_172549630_T_A;2_172549248_A_G;2_172544483_A_G;		0.2599009900990099	2	1	172543919	172604930
ENSG00000077454	ENSG00000077454	ENST00000485071_LRCH4	O75427	7_100115878_G_A	rs12154919	3.14347020491271e-10	3.031810830426279e-12	11.0	1.1428080215130762e-13	1.1402634585335494	0.6452782443092101	-0.059876189858511585	0.022839947366187455	0.6572556340519253	0.039309817011787	-0.3573342348236679	False	100115878,100106714,100116424,100117136,100119315,100129399,100130214,100130674,100132741,100133735,100133986,100137971,100139367,100139831,100140587,100140693,100141861,100141981,100146572,100147506,100149978,100150736,100152178,100156438,100157993,100160094,100160119,100167002,100167263,100167880,100170912,100171788,100172495,100172559,100174207,100176985,100177044,100177174,100178192,100178552…		7_100178192_CA_C;7_100174207_CAAAGGTACA_C;		7_100180060_G_A;7_100172559_G_A;7_100171788_C_A;	7_100182468_G_T;7_100180896_C_T;7_100178552_C_T;7_100178192_CA_C;7_100177174_T_C;7_100177044_A_C;7_100176985_C_T;7_100174207_CAAAGGTACA_C;7_100172559_G_A;		7_100180060_G_A;	0.06435643564356436	7	-1	100169855	100183776
ENSG00000077458	ENSG00000077458	ENST00000545654_FAM76B	F5GX09	11_95593806_G_A	rs500054	5.4228291612869895e-05	9.106247329450676e-07	13.0	1.5786516892838504e-10	0.4066226236952917	0.024336839100187826	-0.13193994318484598	0.19539598697383734	0.2475028169046598	0.5526522555595158	0.0644418443869651	False	95593806,95491692,95492148,95492878,95498269,95500140,95500628,95501241,95501407,95501898,95502075,95502106,95502128,95503636,95505227,95505888,95506284,95506907,95507872,95508383,95508404,95508524,95509037,95509638,95510089,95511445,95514599,95516040,95517576,95517737,95519195,95519506,95519787,95521044,95521953,95522858,95522996,95523030,95523123,95524067,95524421,95524719,95526086,95528045,955…		11_95514598_GT_G;11_95507872_TATAAGA_T;11_95506284_GTTC_G;		11_95522858_G_C;11_95503636_T_C;11_95502128_G_C;	11_95521953_A_G;11_95521044_A_G;11_95519787_C_T;11_95519506_G_A;11_95519195_A_T;11_95517737_C_T;11_95517576_C_T;11_95516040_C_A;11_95514599_T_A;11_95514598_GT_G;11_95511445_C_A;11_95510089_C_T;11_95509638_T_C;11_95509037_C_G;11_95508524_C_A;11_95508404_C_A;11_95508383_G_T;11_95507872_TATAAGA_T;11_95506907_G_C;11_95506284_GTTC_G;11_95505888_G_A;11_95505227_G_A;11_95503636_T_C;	11_95522858_G_C;11_95521953_A_G;11_95521044_A_G;11_95519787_C_T;11_95519506_G_A;11_95519195_A_T;11_95517737_C_T;11_95517576_C_T;11_95516040_C_A;11_95514599_T_A;11_95514598_GT_G;11_95511445_C_A;11_95510089_C_T;11_95509638_T_C;11_95509037_C_G;11_95508524_C_A;11_95508404_C_A;11_95508383_G_T;11_95507872_TATAAGA_T;11_95506907_G_C;11_95506284_GTTC_G;11_95505888_G_A;11_95505227_G_A;11_95503636_T_C;11_95…		0.2797029702970297	11	-1	95502106	95523573
ENSG00000077514	ENSG00000077514	ENST00000532784_POLD3	Q15054	11_74295735_C_T	rs12364155	2.7461224167172995e-11	2.564597975621661e-13	10.0	7.592767675295062e-22	0.9297118231574399	0.8871417042614669	0.007589345238160059	2.016432124388952	0.1075991745095376	0.2239006981109558	-0.08146772454273199	True	74295735,74279293,74280006,74288717,74291558,74292725,74297958,74300234,74301192,74307701,74309019,74309542,74311485,74311624,74311788,74312962		11_74307701_G_GATATA;11_74291558_T_TTTTGTTTG;			11_74312962_G_A;11_74311788_A_G;11_74311624_G_A;11_74311485_C_T;11_74309542_C_T;11_74309019_A_G;11_74307701_G_GATATA;11_74301192_T_C;11_74300234_C_G;11_74297958_A_G;11_74292725_G_A;11_74291558_T_TTTTGTTTG;11_74288717_T_C;11_74280006_T_C;11_74279293_G_A;11_74295735_C_T;			0.2673267326732673	11	1	74204896	74380162
ENSG00000077549	ENSG00000077549	ENST00000433834_CAPZB	P47756-2	1_19811652_C_A	rs66657441	1.83923319918042e-15	9.734826389451763e-18	11.0	1.0917516218683653e-21	1.632400870749907	0.162256828401139	0.13258604414810246	0.31028912757518395	0.5290458779358609	0.9953868443937752	-0.0007860228192066997	True	19811652,19810810,19814027,19814892,19814956,19816006					1_19811652_C_A;			0.09653465346534654	1	-1	19665267	19812066
ENSG00000077616	ENSG00000077616	ENST00000534061_NAALAD2	Q9Y3Q0	11_89888903_A_G	rs186892770	0.00010532189875696752	2.4181174591108047e-06	10.0	3.298258563850388e-11	-0.3838794705321016	2.8741760247837366e-12	-0.4632180781205385	0.2054202952993088	-0.2833579448561792	0.07182264676267297	-0.1895491534338234	False	89888903					11_89888903_A_G;11_89888902_CA_TG;	11_89888903_A_G;11_89888902_CA_TG;		0.3712871287128713	11	1	89864683	89926062
ENSG00000077782	ENSG00000077782	ENST00000484370_FGFR1	P11362-21	8_38283208_C_A	rs3779921	1.6675402380492574e-22	1.0836461791604503e-25	40.0	7.327122457203267e-30	-1.072155326651128	0.32588512797407865	0.04990198017982215	0.2088202066190789	-0.26647701708348315	0.2023017984943057	0.1139831781425753	True	38283208,38021941,38021982,38031345,38032158,38033474,38033989,38034284,38035100,38035959,38036165,38037581,38037803,38038710,38039467,38039940,38042351,38043758,38045029,38045549,38046142,38046769,38047066,38047599,38049006,38049136,38049439,38049622,38050852,38051471,38052385,38052482,38054441,38055186,38055762,38056571,38057330,38057527,38057612,38058361,38058640,38060391,38061962,38065983,380…		8_38291838_TTGC_T;8_38284606_CAG_C;8_38282663_CT_C;		8_38286811_C_G;8_38269514_T_C;	8_38310910_T_G;8_38299624_T_C;8_38298647_C_T;8_38295928_A_G;8_38295743_T_C;8_38293477_T_C;8_38293463_G_A;8_38292466_A_T;8_38292147_A_C;8_38291838_TTGC_T;8_38291836_T_C;8_38288566_C_G;8_38287555_C_T;8_38286811_C_G;8_38284606_CAG_C;8_38284581_C_T;8_38284011_C_T;8_38282663_CT_C;8_38281658_G_A;8_38274193_C_G;8_38272952_T_C;8_38272582_C_A;8_38272542_C_G;8_38283208_C_A;	8_38310910_T_G;8_38299624_T_C;8_38298647_C_T;8_38295928_A_G;8_38295743_T_C;8_38293477_T_C;8_38293463_G_A;8_38292466_A_T;8_38292147_A_C;8_38291838_TTGC_T;8_38291836_T_C;8_38288566_C_G;8_38287555_C_T;8_38286811_C_G;8_38284606_CAG_C;8_38284581_C_T;8_38284011_C_T;8_38272952_T_C;8_38272582_C_A;8_38272542_C_G;		0.2277227722772277	8	-1	38268656	38326352
ENSG00000077809	ENSG00000077809	ENST00000324896_GTF2I	P78347-4	7_74094453_A_G		1.3998368011419063e-20	2.2501885378663128e-23	21.0	3.4524329935162405e-31	-1.2451906790497231	0.9469424275930708	0.003086874556689261	0.6975816149946117	-0.3258425497266866	0.14983838440519331	-0.10384783586505544	True	74094453		7_74094453_A_AGT;			7_74094453_A_G;7_74094453_A_AGT;			0.2277227722772277	7	1	74071994	74175026
ENSG00000077942	ENSG00000077942	ENST00000465578_FBLN1	P23142	22_45928019_T_C	rs136738	0.021524961035355547	0.00041893843860365886	19.0	4.3811299619349357e-07	-0.5752605882958964	0.09334187121524186	-0.14262068363279204	1.3562051447083534	-0.2685712434085272	0.7486640022712122	-0.10457849587698408	False	45928019					22_45928019_T_C;	22_45928019_T_C;		0.17574257425742573	22	1	45898118	45997015
ENSG00000078070	ENSG00000078070	ENST00000265594_MCCC1	Q96RQ3	3_182819049_A_G	rs6443851	4.769244350442822e-08	4.796170218335231e-10	14.0	5.288880540556382e-17	0.6198595775339926	9.238809887686911e-15	0.7052837627687949	7.950991670426827e-05	0.510400698194454	7.937092186486803e-05	0.4308299787589909	False	182819049,182810144,182814131,182814824,182815090,182815556,182815929,182818776,182822252,182823498,182826326,182828245		3_182822252_GA_G;			3_182828245_G_T;3_182826326_C_T;3_182823498_A_G;3_182822252_GA_G;3_182818776_G_A;3_182815929_G_A;3_182815556_T_C;3_182815090_T_G;3_182814824_G_C;3_182814131_A_T;3_182810144_T_G;3_182819049_A_G;	3_182815929_G_A;3_182815556_T_C;3_182815090_T_G;3_182814824_G_C;3_182814131_A_T;3_182810144_T_G;		0.35396039603960394	3	-1	182733006	182833863
ENSG00000078246	ENSG00000078246	ENST00000545331_TULP3	O75386-2	12_3045947_A_C	rs61916379	2.6195570957356283e-05	6.786137971486381e-07	8.0	1.4046504924713693e-11	-0.7389247581443209	0.0013438854065343088	-0.2620055412220821	0.3906816490595121	-0.21783045026179024	0.498229062804239	-0.07261634983994343	False	3045947,3001009,3002684,3003901,3017876,3018802,3033098,3034484,3037705,3037937,3045007,3045155,3045429,3045509,3045512,3045847,3046056,3046173,3046323,3046421,3046531,3046802,3046964,3046965,3048755,3049698,3049938,3050220,3050578,3050644,3050936,3051457,3051526,3051726,3052045,3052748,3053028,3053171,3053904,3054170,3054243,3054299,3054457,3055651,3055703,3056104,3056136,3056571,3057294,3057794…	12_3049698_T_C;	12_3050220_TTG_T;12_3050218_ATT_A;12_3048753_ACA_A;12_3046965_CAA_C;12_3046323_T_TCT;	12_3049698_T_C;	12_3050220_TTG_T;12_3050218_ATT_A;12_3049938_C_T;12_3049698_T_C;12_3048755_A_G;12_3048753_ACA_A;12_3046802_A_G;	12_3048755_A_G;12_3048753_ACA_A;12_3046965_CAA_C;12_3046802_A_G;12_3046531_T_C;12_3046421_C_T;12_3046323_T_TCT;12_3046173_A_G;12_3046056_G_A;12_3045847_G_A;12_3045512_A_C;12_3045509_A_G;12_3045429_C_A;12_3045155_A_G;12_3045007_C_T;12_3037937_T_A;12_3037705_T_A;12_3034484_G_A;12_3033098_G_A;12_3018802_G_C;12_3017876_G_A;12_3003901_A_G;12_3002684_T_A;12_3001009_C_G;12_3045947_A_C;	12_3048755_A_G;12_3048753_ACA_A;12_3046965_CAA_C;12_3046802_A_G;12_3046531_T_C;12_3046421_C_T;12_3046323_T_TCT;12_3046173_A_G;12_3046056_G_A;12_3045847_G_A;12_3045512_A_C;12_3045509_A_G;12_3045429_C_A;12_3045155_A_G;12_3045007_C_T;12_3037937_T_A;12_3037705_T_A;12_3034484_G_A;12_3033098_G_A;12_3018802_G_C;12_3017876_G_A;12_3003901_A_G;12_3002684_T_A;12_3001009_C_G;12_3045947_A_C;	12_3046802_A_G;	0.2326732673267327	12	1	2986389	3050306
ENSG00000078269	ENSG00000078269	ENST00000367113_SYNJ2	O15056	6_158470575_C_T		0.02006842938543417	0.0009179146644625632	8.0	7.302887126861526e-07	0.3748112755734273	0.11773140279760536	0.10154784573019852	0.09005642517626675	0.5405307633810872	0.4892848017213157	0.056055898610974264	False	158470575,158471960,158472445,158475048,158475941,158479295,158481340					6_158481340_T_G;6_158479295_C_T;6_158475941_T_C;6_158475048_G_A;6_158472445_A_G;6_158471960_C_T;6_158470575_C_T;	6_158481340_T_G;6_158479295_C_T;6_158475941_T_C;6_158475048_G_A;6_158472445_A_G;6_158471960_C_T;6_158470575_C_T;		0.4925742574257426	6	1	158402888	158520208
ENSG00000078295	ENSG00000078295	ENST00000338316_ADCY2	Q08462	5_7258672_A_G	rs35573185	0.015207585648179034	0.0006765783664342178	8.0	1.4735666603214481e-07	0.4091209651523598	6.624974756631781e-08	0.3889611510510018	0.4062045548499352	0.4896271132817844	0.07383505206831044	0.18705935793205367	True	7258672,7259853,7265144,7270417,7270814								0.2351485148514852	5	1	7396321	7830194
ENSG00000078304	ENSG00000078304	ENST00000556260_PPP2R5C	H0YJ75	14_102171220_T_C	rs11847486	0.00010412067434993356	7.240344006640875e-07	33.0	4.533029907718203e-11	-0.7238127445822352	0.5741749634296505	0.06828262160696064	0.4595935692937083	-0.4138413922770697	0.9377343605792696	-0.11828011194276122	False	102171220,102136043,102136432,102136532,102138027,102139804,102140137,102140267,102143979,102144207,102144574,102144640,102144644,102144759,102145145,102145381,102145682,102145916,102145928,102146190,102146421,102146586,102147426,102148651,102148743,102149136,102149260,102149333,102149619,102149802,102149844,102149851,102149971,102150602,102150734,102151042,102151124,102151296,102151484,102151642…		14_102231138_CTTT_C;			14_102231138_CTTT_C;14_102231130_C_T;14_102230912_G_A;14_102230193_C_T;14_102230133_T_C;14_102229759_A_G;14_102229720_A_G;14_102229535_T_C;14_102229440_T_C;			0.061881188118811874	14	1	102228135	102394326
ENSG00000078369	ENSG00000078369	ENST00000437146_GNB1	B3KVK2	1_1705945_T_C	rs11260629	0.00012571430762768257	3.6522505274097365e-06	8.0	1.9262366797001527e-09	0.6097364085920289	0.17991590063113685	0.06938380342191272	0.2876994179598751	0.08990195604039107	1.6013642114673061	0.018451530632694002	False	1705945,1733219,1741516					1_1741516_T_A;1_1733219_A_G;			0.2797029702970297	1	-1	1716729	1822495
ENSG00000078618	ENSG00000078618	ENST00000475715_NRD1	B1AKJ5	1_52322509_A_G	rs6676305	0.003929347507294336	8.678844134721921e-05	14.0	6.412478438273544e-07	-0.4320943191914303	0.04917913379510179	-0.12911282421304074	3.451180525372783	-0.3494469973649639	0.36310888103112304	0.04688274218177568	False	52322509,52284018,52293570,52311115,52317231,52334047,52334960,52335096,52340277,52343297,52346354		1_52317230_AT_A;			1_52343297_A_G;1_52340277_C_T;1_52335096_G_A;1_52334960_G_A;1_52334047_A_G;1_52317231_T_A;1_52317230_AT_A;1_52311115_T_C;1_52293570_G_A;1_52284018_A_C;1_52322509_A_G;			0.3663366336633663	1	-1	52254863	52344477
ENSG00000078674	ENSG00000078674	ENST00000519253_PCM1	E7ETA6	8_17733479_C_T	rs2517296	0.009202204282903371	0.00013449469608449072	23.0	3.976423355067735e-11	0.446431637213151	1.3021420974411584e-07	0.4437623714756409	0.015859769592468216	0.6791269018308389	0.026416002692089567	0.34145175972474995	False	17733479,17733612,17733970,17734520,17734790,17737393,17759924,17788511					8_17788511_C_T;			0.07673267326732673	8	1	17780349	17885478
ENSG00000078699	ENSG00000078699	ENST00000397800_CBFA2T2	O43439-4	20_32356315_A_G	rs2626556	0.02339738738851829	0.0007955742167135878	11.0	1.3493445860742987e-05	-0.3636245979389802	0.14214448014133907	-0.07247840882738907	0.9115547514679152	0.0038959390108423975	0.08915980996411887	-0.12546621677493208	False	32356315,32355932,32364317								0.4455445544554456	20	1	32077881	32237842
ENSG00000079134	ENSG00000079134	ENST00000577429_THOC1	A0A087WWS1	18_179766_A_T	rs28555521	1.00928049622851e-14	3.627279025364493e-17	18.0	2.4471878526199844e-21	0.8428156397484112	0.0026408323348120874	-0.18304535615452552	0.4222405520145038	0.33626140662077497	0.027574935939333217	-0.16043766004549864	False	179766								0.25	18	-1	214520	268050
ENSG00000079150	ENSG00000079150	ENST00000424785_FKBP7	Q9Y680-3	2_179333450_T_C	rs7575643	0.0007849599264554051	2.6347675724795488e-05	8.0	7.05422319674672e-08	0.4759605009429705	2.523168679868301e-09	0.5221424154662906	0.005167994269805989	0.6031477257278539	0.00015228545239161158	0.5013184832978068	False	179333450,179284643,179284663,179285938,179286834,179288690,179289249,179289632,179290692,179290964,179295843,179297824,179303976,179306028,179308502,179310085,179311529,179312440,179312613,179313682,179314359,179319391,179321904,179324025,179327873,179333109,179336347,179336672,179339606,179341953,179342330,179344002,179349227,179357251,179358665					2_179342330_T_C;2_179341953_G_A;2_179339606_T_G;2_179336672_A_G;2_179336347_T_C;2_179333109_A_G;2_179333450_T_C;	2_179342330_T_C;2_179341953_G_A;2_179339606_T_G;2_179336672_A_G;2_179336347_T_C;2_179333109_A_G;2_179333450_T_C;		0.17574257425742573	2	-1	179328391	179343327
ENSG00000079246	ENSG00000079246	ENST00000417391_XRCC5	P13010	2_216975305_G_A	rs828909	5.351486257445599e-12	4.55713485108282e-14	10.0	1.0467076914224658e-20	-0.8139430772820762	0.013981565548818369	0.10761994446231	2.4502294494711565	-0.2873044879829493	0.12489011725515956	-0.1612166755069947	True	216975305,216958369,216958524,216961195,216961521,216963733,216963963,216970801,216970803,216972732,216977028,216977323,216978518,216978522,216979898		2_216979898_TTG_T;			2_216979898_TTG_T;2_216978522_T_C;2_216978518_A_T;2_216977323_G_A;2_216977028_A_G;2_216972732_G_T;2_216975305_G_A;	2_216979898_TTG_T;2_216978522_T_C;2_216978518_A_T;		0.4628712871287129	2	1	216972187	217071026
ENSG00000079257	ENSG00000079257	ENST00000264265_LXN	Q9BS40	3_158366205_C_T	rs1864504	1.1142437323339655e-07	8.14517148489249e-09	2.0	3.645405997473213e-15	0.5655388652992142	5.73586521328567e-15	0.5685215719282558	0.01110942276258694	0.2680317965966021	0.002186486511206009	0.2227308826031873	False	158366205,158352372,158360055,158360708,158362526,158362588,158363055,158365233,158365250,158365456,158365538,158368784,158369160,158369163,158369452,158369613,158369798,158370543,158370734,158371406,158371546,158371635,158372477,158372502,158372930,158373197,158373274,158373459,158374222,158375040,158375788,158377491,158378156,158379401,158379649,158380150,158381300,158381834,158382229,158382522…		3_158388721_C_CAAAGAAA;3_158381300_TC_T;3_158369798_A_AGT;3_158369613_AT_A;		3_158390395_A_T;	3_158389772_C_T;3_158388721_C_CAAAGAAA;3_158388394_T_G;3_158387487_T_C;3_158386737_C_T;3_158386507_A_G;3_158384920_C_T;3_158383882_T_C;3_158382522_G_A;3_158382229_T_C;3_158381834_A_G;3_158381300_TC_T;3_158380150_G_A;3_158379649_G_A;3_158379401_C_T;3_158378156_C_T;3_158377491_A_G;3_158375788_C_T;3_158375040_A_T;3_158374222_A_G;3_158373459_T_C;3_158373197_T_C;3_158372930_A_G;3_158372502_T_C;3_15837…			0.33910891089108913	3	-1	158363611	158390482
ENSG00000079332	ENSG00000079332	ENST00000373241_SAR1A	Q9NR31	10_71910663_C_T		0.0007008869984255362	2.074687068969183e-05	9.0	4.3897998910519545e-09	0.42284554280474745	1.2726705232934856e-11	0.6211694251166536	0.21156840626145565	0.15572201509961034	0.8717781595575954	0.013255368873625885	False	71910663,71900246,71901476,71905695,71910630,71911014,71916461,71916826,71917017,71919027,71919188,71919271,71925446,71926620,71931646				10_71911014_C_T;10_71910630_G_A;10_71910663_C_T;	10_71926620_G_A;10_71925446_T_C;10_71919271_G_A;10_71919188_G_A;10_71919027_T_C;10_71917017_G_A;10_71916826_C_T;10_71916461_G_A;			0.3341584158415842	10	-1	71907045	71930279
ENSG00000079387	ENSG00000079387	ENST00000551798_SENP1	Q9P0U3-2	12_48563644_G_A	rs4760689	0.0018857523127452913	4.193745530217257e-05	13.0	1.2797819501875938e-08	0.5584108537847711	0.467587658389358	-0.05440430104692838	0.16440154573541696	0.2458686345555425	0.6037214052728266	0.05499067893165988	False	48563644,48425235,48426392,48426726,48427875,48431168,48432743,48437686,48441479,48442105,48447658,48448134,48448466,48451339,48453820,48458448,48458529,48462868,48463806,48464475,48465559,48466697,48467977,48470533,48470680,48470717,48472366,48472453,48473059,48473739,48475233,48477422,48481519,48481839,48482153,48483241,48483492,48483507,48483973,48484433,48484958,48488355,48489117,48490834,484…		12_48481839_CT_C;12_48465559_TC_T;12_48451339_ATATAT_A;		12_48477422_A_G;12_48437686_G_A;	12_48494426_A_C;12_48494334_C_T;12_48492607_T_C;12_48492048_T_A;12_48490834_T_A;12_48489117_C_T;12_48488355_C_T;12_48484958_T_C;12_48484433_G_A;12_48483973_T_C;12_48483507_T_C;12_48483492_T_G;12_48483241_T_C;12_48482153_T_C;12_48481839_CT_C;12_48481519_T_C;12_48475233_T_C;12_48473739_T_A;12_48473059_G_A;12_48472453_G_A;12_48472366_C_T;12_48470717_G_A;12_48470680_G_A;12_48470533_C_A;12_48467977_C_…	12_48494426_A_C;12_48494334_C_T;12_48492607_T_C;12_48492048_T_A;12_48490834_T_A;12_48489117_C_T;12_48488355_C_T;12_48484958_T_C;12_48484433_G_A;12_48483973_T_C;12_48483507_T_C;12_48483492_T_G;12_48483241_T_C;12_48482153_T_C;12_48481839_CT_C;12_48481519_T_C;12_48477422_A_G;12_48475233_T_C;12_48473739_T_A;12_48473059_G_A;12_48472453_G_A;12_48472366_C_T;12_48470717_G_A;12_48470680_G_A;12_48470533_C_…	12_48477422_A_G;	0.22524752475247525	12	-1	48436681	48500091
ENSG00000079459	ENSG00000079459	ENST00000529464_FDFT1	P37268	8_11736582_G_A	rs75311297	0.001329916258481001	1.70430982633977e-05	22.0	6.461135976476009e-09	0.9465262246240131	0.8880000507648595	-0.015099479163269624	0.9253820585173008	0.4612225908812744	0.7278972444659098	0.04462847359543432	False	11736582								0.08168316831683169	8	1	11653082	11696818
ENSG00000079785	ENSG00000079785	ENST00000233084_DDX1	Q92499	2_15743718_A_C	rs6717251	4.504222021062333e-05	1.616723618083026e-06	6.0	4.0410993874509655e-10	-0.3700959678952075	1.1340564228260791e-10	-0.4390415315108617	0.1648215837948198	-0.27741432332382565	0.17058582203879244	-0.1234119131611553	True	15743718,15723605,15724206,15724560,15726648,15726794,15731605,15731859,15731998,15733723,15734149,15734854,15737268,15739419,15745168,15745839,15747393,15747641,15748960,15748961,15749699,15753937,15755676,15758114,15762053,15762991,15764605,15764942,15768981,15771853,15773972,15775615,15775741,15779743,15782807,15783758,15787775,15787986,15789179,15789649		2_15747641_AT_A;2_15739419_TTTTA_T;		2_15731998_A_G;2_15731859_A_C;	2_15768981_C_G;2_15764942_G_A;2_15764605_C_T;2_15762991_A_G;2_15762053_T_C;2_15758114_A_G;2_15753937_G_A;2_15749699_A_C;2_15748961_T_C;2_15748960_T_G;2_15747641_AT_A;2_15745839_A_G;2_15745168_G_C;2_15739419_TTTTA_T;2_15737268_A_G;2_15734854_G_A;2_15734149_T_C;2_15733723_G_C;2_15731605_C_T;2_15743718_A_C;		2_15747393_C_T;	0.3836633663366337	2	1	15731302	15771235
ENSG00000079805	ENSG00000079805	ENST00000589106_DNM2	P50570	19_10916684_C_T	rs2287029	0.04651803876786725	0.0008192861296908902	23.0	3.5233964295368377e-06	0.5074511758108574	0.2783246592804164	-0.07512690307385038	0.07692004282935258	0.2497870301511407	0.7410197491560939	0.2624330689761578	True	10916684,10901440,10903972,10908623,10908701,10909953,10914719,10915324,10946416,10948031,10950125					19_10915324_A_T;19_10914719_C_G;19_10909953_C_T;19_10908701_T_C;19_10908623_G_T;19_10903972_G_A;19_10901440_G_A;19_10916684_C_T;			0.17574257425742573	19	1	10828755	10944164
ENSG00000079819	ENSG00000079819	ENST00000527411_EPB41L2	E9PHY5	6_131504401_T_C		2.2871999507151264e-07	1.1246731835874684e-09	31.0	3.4436961147427395e-11	0.513262930093063	1.0529144905461296e-16	0.6591045082458211	6.367314452845572e-10	0.8442928710450077	4.318384007625628e-11	0.806386504443917	False	131504401,131505231,131507621,131511289,131517694,131520994,131522482,131524618,131530313,131533313,131533388,131534709,131536251,131538761,131539119,131539974,131543082,131549188,131552850,131554158,131555391,131559066,131565917,131567214,131584810,131586300,131586301,131590957,131592862,131597369,131604844,131604974,131609703,131610484,131612504,131615814,131616820,131617131,131617237								0.14356435643564355	6	-1	131160487	131384462
ENSG00000079950	ENSG00000079950	ENST00000367941_STX7	O15400-2	6_132878322_C_T		0.012177469380599966	0.0010581163849586244	4.0	4.178300132335927e-06	0.3681912121366195	2.0839709688779253e-07	0.4784298106749218	1.3325703074785538	0.3147237148049173	0.2492714721909209	0.14456873488321875	True	132878322,132850764,132850775,132869220,132872358,132876576,132877957,132877958,132879258,132879758,132879852,132879857,132879865,132879889,132880608,132880671,132880717,132880779,132880825								0.12128712871287127	6	-1	132767006	132834337
ENSG00000080345	ENSG00000080345	ENST00000454583_RIF1	Q5UIP0	2_152277923_A_G	rs11896481	7.470434624088429e-05	1.1968712259415123e-06	14.0	8.649776773855412e-12	-0.7777468462359735	0.011872366440922436	-0.09803435690744476	1.2045213943779411	-0.4394403670728133	0.4160437495282505	0.06914363788920719	False	152277923,152265561,152267359,152270263,152276133,152280246,152281220,152282837,152283199,152287183,152290117,152290118,152295141,152296075,152298751,152304403,152307091,152307123,152307223,152307706,152313539,152314385,152318713,152323086,152323720,152330148,152331745,152333118,152334988,152335380,152338989,152342481,152345166,152345206,152351797,152385217		2_152345166_TA_T;2_152334986_TCG_T;2_152318713_TATC_T;		2_152351797_C_G;2_152335380_T_C;2_152334988_G_A;2_152334986_TCG_T;2_152333118_C_G;2_152331745_T_G;	2_152345206_A_G;2_152345166_TA_T;2_152342481_A_G;2_152338989_C_T;2_152335380_T_C;2_152334988_G_A;2_152334986_TCG_T;2_152333118_C_G;2_152331745_T_G;2_152330148_A_G;2_152323720_C_T;2_152323086_C_A;2_152318713_TATC_T;2_152313539_C_T;2_152307706_C_T;2_152307223_G_A;2_152307123_G_A;2_152307091_C_A;2_152304403_A_G;2_152298751_G_A;2_152296075_C_G;2_152295141_A_G;2_152290118_G_A;2_152290117_C_T;2_1522871…	2_152351797_C_G;2_152345206_A_G;2_152345166_TA_T;2_152342481_A_G;2_152338989_C_T;2_152335380_T_C;2_152334988_G_A;2_152334986_TCG_T;2_152333118_C_G;2_152331745_T_G;2_152330148_A_G;2_152323720_C_T;2_152323086_C_A;	2_152314385_G_A;	0.2524752475247525	2	1	152266397	152364527
ENSG00000080802	ENSG00000080802	ENST00000428680_CNOT4	O95628-8	7_135045786_T_G	rs6962887	0.009371588058593842	0.0002630035793546433	12.0	4.434604509876656e-09	0.29644582483008963	0.03535710503976517	0.1204156533169116	0.07241755448490092	0.3785391599402113	0.730389291833982	-0.030183438981243867	False	135045786								0.2698019801980198	7	-1	135046547	135194875
ENSG00000080815	ENSG00000080815	ENST00000324501_PSEN1	E7ES96	14_73672831_C_A	rs165934	1.4113481314843266e-06	8.970250676684494e-09	27.0	1.454926635341691e-12	-0.3238962156345499	0.00012454904526123115	-0.20599815784404324	0.7690158990759812	-0.14385038433251873	0.30470905227050515	-0.12794244027452378	False	73672831,73620370,73621142,73630270,73664853,73668919,73677963,73687144,73691305		14_73621142_C_CA;		14_73687144_C_T;	14_73677963_T_G;14_73664853_G_T;14_73630270_G_A;14_73621142_C_CA;14_73621142_C_A;14_73672831_C_A;	14_73677963_T_G;14_73664853_G_T;14_73630270_G_A;14_73621142_C_CA;14_73621142_C_A;14_73672831_C_A;		0.3960396039603961	14	1	73603126	73690399
ENSG00000080819	ENSG00000080819	ENST00000264193_CPOX	P36551	3_98298600_C_T	rs7103	0.0006508352744967416	3.441725939940426e-05	5.0	7.556244938122277e-08	0.29217176668150835	1.4307616377263988e-07	0.4066533981375552	1.1207149421489198	0.24074316079941285	0.2244318390044184	0.11380846939453072	False	98298600,98298079,98299365,98300749,98301659,98301934				3_98299365_T_G;3_98298600_C_T;	3_98301934_T_C;3_98301659_C_G;3_98300749_G_C;			0.37376237623762376	3	-1	98239976	98312567
ENSG00000080822	ENSG00000080822	ENST00000511081_CLDND1	D6RC11	3_98223679_G_A	rs2061582	2.26979740123153e-11	6.574189720692358e-14	32.0	2.2018372344262547e-23	1.6599491740654873	0.4553031752043395	0.08821422535223268	0.6515136334198444	0.016220284566261456	0.5118204751476569	-0.0957692034486732	False	98223679,98225188,98225660,98226248,98226295,98226362,98226561,98228007,98228540,98229459,98229932,98230275,98236941,98240317,98243040,98245164,98245688,98247801		3_98226248_C_CT;3_98226247_TC_T;			3_98236941_C_T;3_98230275_A_G;3_98229932_T_C;3_98229459_C_T;3_98228540_A_G;3_98228007_T_C;3_98226561_T_C;3_98226362_G_A;3_98226295_G_T;3_98226248_C_A;3_98226248_C_CT;3_98226247_TC_T;3_98225660_T_G;3_98225188_G_A;3_98223679_G_A;	3_98236941_C_T;		0.10643564356435643	3	-1	98216756	98241910
ENSG00000080986	ENSG00000080986	ENST00000576274_NDC80	O14777	18_2572687_G_A	rs2677892	1.2355247011907205e-12	1.9850937918448885e-14	5.0	4.2534158483072465e-21	0.7353528004417654	0.7078324057566072	0.023389492528578942	1.3659156875899765	0.19634126211463165	0.5535420700586311	-0.04818444958436397	True	2572687,2575823,2577587,2580054,2584410,2585077,2585984		18_2580054_ATTTCACCT_A;			18_2585984_C_A;18_2585077_G_A;18_2584410_T_C;18_2580054_ATTTCACCT_A;18_2577587_A_G;18_2575823_C_G;18_2572687_G_A;			0.33663366336633666	18	1	2571510	2616634
ENSG00000081386	ENSG00000081386	ENST00000374641_ZNF510	Q9Y2H8	9_99463045_C_T	rs62558799	0.014554348640089075	0.0012869009162769893	4.0	0.00012791987791665134	-0.5523006064694455	0.4780298448847627	0.06596935070780671	0.7760244725646595	-0.10321093604188204	0.8160303245155198	0.0580658141024788	False	99463045,99471127								0.09405940594059406	9	-1	99518147	99540411
ENSG00000081665	ENSG00000081665	ENST00000545006_ZNF506	Q5JVG8	19_19882476_C_T	rs4808983	4.333691858990564e-12	3.0413661207531984e-14	12.0	2.03651211973539e-22	1.104413184134229	0.1222378043856861	0.21103696760572	0.02407432564255005	-0.363125430842068	0.08789711880314767	0.3228478628346624	False	19882476,19879102,19879656,19886197,19886410,19887292,19896767,19897161,19905169,19910250,19910658,19919409,19920912,19920967,19926560		19_19910658_AAGAC_A;		19_19905169_A_C;19_19896767_G_C;	19_19926560_A_G;19_19920967_C_A;19_19920912_T_C;19_19910658_AAGAC_A;19_19910250_T_C;19_19905169_A_C;	19_19926560_A_G;19_19920967_C_A;19_19920912_T_C;19_19910658_AAGAC_A;19_19910250_T_C;19_19905169_A_C;19_19896767_G_C;	19_19910250_T_C;	0.17326732673267325	19	-1	19896648	19932560
ENSG00000081760	ENSG00000081760	ENST00000261686_AACS	Q86V21	12_125595058_G_C	rs10846829	5.677894482381283e-09	5.147064679310249e-11	14.0	4.928555538207307e-13	0.7144067259618051	0.1269516226505325	-0.1159431928069312	0.04750603493991043	0.17043529537601287	0.08595492163318053	-0.15137408533068486	False	125595058,125593010,125593053,125593318,125594156,125594245,125596458,125598604,125601076,125602534,125602684,125605887,125605957,125606123,125606180,125608492,125610353,125621066,125621419,125622262,125629103,125630401		12_125610353_ATGGCCAT_A;			12_125622262_G_A;12_125621419_A_G;12_125621066_T_C;12_125610353_ATGGCCAT_A;12_125608492_T_C;12_125606180_C_T;12_125606123_G_A;12_125605957_C_T;12_125605887_A_G;12_125602684_T_C;12_125601076_T_C;12_125598604_G_C;12_125596458_G_A;12_125594245_G_A;12_125594156_C_A;12_125593318_G_A;12_125593053_A_G;12_125593010_C_T;12_125595058_G_C;			0.3242574257425743	12	1	125549925	125627873
ENSG00000081803	ENSG00000081803	ENST00000412584_CADPS2	Q86UW7-2	7_122447705_A_G	rs34959847	0.00035588916867881123	1.27850764968797e-05	7.0	2.0890537898051238e-09	0.5447609580750992	1.0565735187115812e-09	0.5859574159411619	0.03589532299666582	0.5308631328828537	0.0006459353497583419	0.39741554268557255	False	122447705,122389397,122389964,122390412,122392106,122396279,122397210,122397965,122398319,122400402,122400808,122401455,122401581,122401688,122403126,122403395,122404277,122406311,122408812,122409463,122410576,122411422,122412248,122413705,122415644,122415751,122416149,122416179,122416361,122418337,122418733,122418741,122420535,122420946,122422418,122423581,122426165,122426782,122426905,122427713…		7_122504524_ACT_A;7_122490415_TA_T;7_122487651_AT_A;7_122485744_C_CG;7_122459672_AACTTAG_A;7_122456303_ATTTTTTAGAT_A;7_122455672_CA_C;7_122448294_GTGTGTTGT_G;7_122437735_C_CAT;7_122427730_AG_A;7_122422418_A_AAAC;7_122420946_G_GACC;7_122413705_CT_C;7_122401455_T_TTCA;7_122397210_T_TTTTA;7_122396279_A_AA;7_122392106_CCAAGAAAACT_C;			7_122513089_G_A;7_122511869_C_G;7_122511041_A_G;7_122509701_G_A;7_122508169_G_C;7_122504524_ACT_A;7_122503676_A_C;7_122502787_A_T;7_122502122_A_C;7_122497783_G_A;7_122494140_G_A;7_122493313_G_A;7_122492340_T_C;7_122491569_C_T;7_122490416_A_G;7_122490415_TA_T;7_122487651_AT_A;7_122485858_A_C;7_122485744_C_T;7_122485744_C_CG;7_122485297_T_G;7_122484148_G_A;7_122482495_C_T;7_122482195_C_T;7_12248112…			0.17326732673267325	7	-1	121958481	122526813
ENSG00000081870	ENSG00000081870	ENST00000371378_HSPB11	Q9Y547	1_54373313_A_G	rs11206243	0.08119249759836521	0.005892233711855015	6.0	4.692994872130916e-06	-0.5230624412692708	0.02569868884513185	0.15138564418199715	0.17780896938053978	-0.4932508549426018	0.5665959193625578	-0.07011596968615262	True	54373313,54374764,54377098,54381406,54381718,54382383,54382524,54382648,54382686,54383914,54385043,54385047,54386271,54386402,54386643,54387577,54387857,54388067,54388307,54388970,54389200,54389471,54389517,54390019,54390184,54392302,54395488,54396725,54399102,54402114,54404522,54404892,54407521,54408585,54409155,54410190	1_54382686_A_G;1_54382648_T_C;1_54382524_G_A;	1_54409155_G_GGA;1_54388970_T_TAATA;		1_54395488_G_C;1_54389471_C_A;1_54382383_C_T;	1_54410190_T_C;1_54409155_G_GGA;1_54409155_G_A;1_54408585_C_G;1_54407521_C_T;1_54404892_A_G;1_54404522_C_T;1_54402114_C_A;1_54399102_C_T;1_54396725_C_T;1_54395488_G_C;1_54392302_C_G;1_54390184_C_T;1_54390019_A_T;1_54389471_C_A;1_54389200_A_G;1_54388970_T_TAATA;1_54388307_A_C;1_54387857_T_C;1_54387577_T_C;1_54386643_T_C;1_54386402_G_T;1_54386271_T_C;1_54385047_C_A;1_54385043_A_G;1_54383914_A_G;			0.1311881188118812	1	-1	54382247	54411602
ENSG00000082146	ENSG00000082146	ENST00000415688_STRADB	Q9C0K7	2_202352649_A_G	rs2714481	0.09125215709837352	0.0040463494737810884	10.0	2.878878645233996e-05	-0.3527463097485089	0.4881679414373731	-0.049583933156075635	0.29241885695467795	0.05294606559167958	0.977478287540751	0.002644654247425826	False	202352649,202246034,202263901,202264877,202281136,202284867,202290117,202290995,202302849,202314833,202340747,202342402,202346327,202352733,202352867,202362150,202362955,202370343,202373160,202377330,202379921,202379923					2_202340747_G_A;2_202314833_C_T;2_202302849_G_A;2_202290995_G_A;2_202290117_G_T;2_202284867_T_C;2_202281136_A_G;2_202264877_G_T;2_202263901_C_G;		2_202342402_G_T;	0.34405940594059403	2	1	202252581	202345569
ENSG00000082153	ENSG00000082153	ENST00000410110_BZW1	Q7L1Q6-4	2_201672370_C_T	rs10931924	9.93218487818384e-31	5.9309502014017835e-34	13.0	1.1583817383285387e-38	-0.8769058782367452	0.106450279669046	-0.04249609021619642	0.5731319232870853	-0.08978205210955803	0.5258946324140163	0.053709972163465736	True	201672370,201670278,201675353,201676441,201678985,201682395,201683986,201710305				2_201676441_G_A;2_201675353_G_C;	2_201683986_G_T;2_201682395_G_A;2_201678985_T_C;2_201676441_G_A;			0.405940594059406	2	1	201675317	201688569
ENSG00000082212	ENSG00000082212	ENST00000321341_ME2	P23368	18_48473753_G_A	rs12277	4.1327204725484146e-07	1.306604637757015e-08	5.0	6.084570678939204e-13	0.4860123760890494	2.6724635938935366e-25	0.6422706012726709	0.3524560697427715	0.2401258755293045	0.00890337938667389	0.20989976282270795	False	48473753,48387956,48391347,48391491,48392104,48392550,48397197,48397727,48397801,48398867,48399870,48401123,48403967,48404066,48405479,48405481,48405489,48405846,48408285,48408399,48410007,48411328,48412616,48413319,48414331,48414404,48415255,48416948,48420937,48421023,48422985,48424454,48424991,48425038,48425239,48429496,48429604,48429825,48430067,48433583,48434110,48445249,48445268,48445803,484…		18_48468052_G_GT;18_48420937_CA_C;18_48415254_TA_T;		18_48405489_T_A;18_48405481_C_G;18_48405479_C_T;18_48473753_G_A;	18_48468355_C_T;18_48468052_G_T;18_48468052_G_GT;18_48467776_A_G;18_48465028_T_A;18_48462210_G_A;18_48457973_A_G;18_48457313_C_G;18_48456903_T_C;18_48454796_T_G;18_48446953_C_T;18_48446595_G_T;18_48445803_T_C;18_48445268_G_A;18_48445249_A_G;18_48434110_G_A;18_48433583_A_G;18_48430067_T_C;18_48429825_G_A;18_48429604_T_A;18_48429496_A_G;18_48425239_C_T;18_48425038_G_A;18_48424991_T_C;18_48424454_A_…			0.38613861386138615	18	1	48405419	48474691
ENSG00000082213	ENSG00000082213	ENST00000504866_C5orf22	Q49AR2	5_31676987_C_T	rs6869938	0.05698275374856609	0.002147165631722449	11.0	1.0618434732149011e-06	-0.2318798398593933	0.2875000579526041	-0.08365128920362322	0.5764025335727573	-0.08841021220870537	0.06607752787166299	0.0841797322830331	False	31676987								0.4777227722772277	5	1	31532373	31555165
ENSG00000082269	ENSG00000082269	ENST00000425415_FAM135A	Q9P2D6	6_71243352_A_G		0.0029940200226050173	5.6520843757716454e-05	16.0	4.3065871911576056e-09	0.5844318128691408	0.022883965088414976	-0.14784855509684794	0.058054848930635776	0.08956551692803638	0.6556198511026397	-0.06901225492416363	False	71243352,71097327,71097590,71103675,71103738,71104670,71105478,71106097,71106657,71107010,71107425,71109059,71109113,71109165,71109386,71111656,71112666,71113068,71114669,71114753,71115513,71115739,71116172,71117561,71118307,71120063,71120495,71121673,71122212,71123666,71124529,71124530,71125509,71126894,71126904,71127938,71128789,71128806,71129279,71129673,71129988,71130724,71131822,71132172,711…		6_71258430_GA_G;6_71247663_ATCT_A;6_71243085_GTA_G;6_71239766_CA_C;6_71232845_A_AG;6_71232014_GTTTATA_G;6_71230357_AATAC_A;6_71229612_G_GATAT;6_71229611_TG_T;6_71223693_GT_G;6_71221279_TA_T;6_71214858_TC_T;6_71212207_G_GCA;6_71211978_ACT_A;6_71211977_AAC_A;6_71206172_T_TAG;6_71202642_CTT_C;6_71200974_AC_A;6_71200973_TA_T;6_71192091_TA_T;6_71174909_ATT_A;6_71173747_TCTTA_T;6_71167831_A_ACT;6_71155…		6_71270543_A_C;6_71269632_G_A;6_71269459_C_T;6_71267329_A_G;6_71236216_C_T;	6_71268413_T_C;6_71267769_A_G;6_71267666_G_A;6_71267566_G_A;6_71267329_A_G;6_71264443_G_T;6_71263634_C_A;6_71263516_C_T;6_71261149_A_C;6_71260257_T_A;6_71258989_C_T;6_71258430_GA_G;6_71255436_A_G;6_71255433_G_A;6_71254720_C_A;6_71253472_C_A;6_71253318_G_A;6_71252760_T_C;6_71251421_T_C;6_71250089_A_G;6_71249960_T_C;6_71249931_A_G;6_71249766_G_A;6_71247863_T_C;6_71247663_ATCT_A;6_71247440_C_T;6_712…	6_71270543_A_C;6_71269632_G_A;6_71269459_C_T;6_71268413_T_C;6_71267769_A_G;6_71267666_G_A;6_71267566_G_A;6_71267329_A_G;6_71264443_G_T;6_71263634_C_A;6_71263516_C_T;6_71261149_A_C;6_71260257_T_A;6_71258989_C_T;6_71258430_GA_G;6_71255436_A_G;6_71255433_G_A;6_71254720_C_A;6_71253472_C_A;6_71253318_G_A;6_71252760_T_C;6_71251421_T_C;6_71250089_A_G;6_71249960_T_C;6_71249931_A_G;6_71249766_G_A;6_712478…	6_71269459_C_T;6_71236216_C_T;	0.14603960396039606	6	1	71122644	71270877
ENSG00000082515	ENSG00000082515	ENST00000519059_MRPL22	E7ESL0	5_154385294_G_T	rs286597	0.08687870587325335	0.0054724480263733215	7.0	2.2747267065795583e-05	0.3585477950232187	0.7417502709657118	0.015359580304044485	0.04205440830301442	0.2815820554902944	0.024761695553089817	0.1679241648160943	False	154385294,154369436,154376097,154377524,154382974,154383007,154383798,154386536,154388666,154389514,154390439								0.3143564356435644	5	1	154320630	154348971
ENSG00000082641	ENSG00000082641	ENST00000357480_NFE2L1	B4DYE1	17_46190928_T_C	rs12601675	0.07970875617240841	0.0015049386220558428	23.0	2.1847275078062538e-06	-0.3347293935966021	0.027193925191011874	-0.17943278605259486	0.17914642153677776	-0.09350196309689672	0.5443569252046208	-0.09623507299761247	False	46190928,46125191,46125978,46128359,46129315,46129353,46130254,46132723,46132937,46132939,46134236,46139569,46139732,46141276,46142656,46142680,46143515,46145709,46146820,46146955,46147039,46147807,46149404,46150487,46151046,46152559,46152715,46154202,46154669,46156351,46158050,46158908,46159391,46159811,46165091,46165586,46166073,46167942,46169050,46171650,46173840,46174070,46174488,46174715,461…		17_46134236_A_ACT;17_46132939_TG_T;		17_46128359_G_C;	17_46134236_A_ACT;17_46132939_TG_T;17_46132936_GTATG_GAAT;17_46132937_T_A;17_46132936_GTATG_GAAT;17_46132723_G_C;17_46130254_G_T;17_46129353_C_T;17_46129315_C_T;17_46128359_G_C;17_46125978_C_G;			0.2227722772277228	17	1	46125691	46138849
ENSG00000082805	ENSG00000082805	ENST00000397203_ERC1	X6RLX0	12_1100637_G_C	rs10774481	3.374460892042854e-10	1.5016126058451498e-12	24.0	1.4633884524494332e-16	0.4956174843087998	0.3254489622210557	0.04378268469710592	0.07646255596802222	0.3074656577112869	0.3312889864069909	0.07512641025977795	False	1100637,1105098,1111463,1117618,1117999,1123187,1139195,1140679,1143642,1148376,1150375,1153004,1153313,1153596,1160156		12_1153004_AT_A;12_1150375_CT_C;		12_1100637_G_C;	12_1160156_T_C;12_1153596_A_G;12_1153313_C_T;12_1153004_AT_A;12_1150375_CT_C;12_1148376_G_A;12_1143642_G_A;12_1140679_G_A;12_1139195_C_T;12_1123187_A_T;12_1117999_G_A;12_1117618_A_T;12_1111463_C_T;12_1105098_G_C;12_1100637_G_C;	12_1160156_T_C;12_1153596_A_G;12_1153313_C_T;12_1153004_AT_A;12_1150375_CT_C;12_1148376_G_A;12_1143642_G_A;12_1140679_G_A;12_1139195_C_T;12_1123187_A_T;12_1117999_G_A;12_1117618_A_T;12_1111463_C_T;12_1105098_G_C;12_1100637_G_C;		0.4925742574257426	12	1	1099675	1605099
ENSG00000082898	ENSG00000082898	ENST00000457483_XPO1	O14980	2_61863619_A_G	rs10181289	9.81293221558751e-06	7.920636006759503e-08	24.0	3.8146129559037066e-15	-0.622255982272366	0.2977205113527631	0.06794861050551969	1.2804910175372313	-0.4429549935088361	0.07194792992922923	0.14764421494567292	True	61863619,61845215,61845485,61848078,61851845								0.3886138613861386	2	-1	61704984	61765761
ENSG00000083312	ENSG00000083312	ENST00000337273_TNPO1	Q92973-2	5_72102848_G_A	rs10068965	0.005144144035888929	0.00010236707469677232	16.0	2.5059382038955488e-08	0.3293281497369686	0.04705802771327746	-0.08981270392632434	4.344251132114578	0.1562339227334284	0.91979139192398	0.007935470633545272	False	72102848,72097351,72103724,72104415,72108001,72110515,72114615,72117381,72118150,72125370,72125995,72127469,72129604,72130646,72137235,72139788,72142222,72147741,72160974,72163213,72163793,72168857,72172779,72180647,72182743,72182857,72186905,72193315,72200345,72204024,72204099,72236003,72236312,72246282,72247461,72248719,72252475,72255610,72255808,72277724,72281315,72296606,72335708,72339109,723…		5_72163213_TTC_T;5_72142222_CGTT_C;5_72114615_GA_G;			5_72204099_A_G;5_72204024_A_G;5_72200345_G_A;5_72186905_A_G;5_72182857_A_G;5_72182743_A_G;5_72180647_C_T;5_72172779_G_A;5_72168857_T_C;5_72163793_G_T;5_72163213_TTC_T;5_72160974_A_G;5_72147741_G_A;5_72142222_CGTT_C;5_72139788_A_G;5_72137235_G_A;5_72130646_A_G;5_72129604_C_T;5_72127469_C_T;5_72125995_A_G;5_72125370_C_G;5_72117381_G_A;5_72114615_GA_G;	5_72172779_G_A;5_72168857_T_C;5_72163793_G_T;5_72163213_TTC_T;5_72160974_A_G;5_72147741_G_A;5_72142222_CGTT_C;5_72139788_A_G;5_72137235_G_A;5_72130646_A_G;5_72129604_C_T;5_72127469_C_T;5_72125995_A_G;5_72125370_C_G;5_72117381_G_A;5_72114615_GA_G;		0.4801980198019802	5	1	72112139	72212560
ENSG00000083444	ENSG00000083444	ENST00000196061_PLOD1	Q02809-2	1_11990284_T_C	rs72640291	0.0003327529024659694	8.309038013823253e-06	10.0	2.571490483312583e-15	-0.7514019294059445	3.81851794913164e-10	-0.8272240998357002	0.18514599577130827	-0.51173703563861	0.022448884807419682	-0.3797655750954827	False	11990284,11943792,11959085,11960394,11961739,11962135,11965100,11976032,11976421,11979107,11981606,11981659,11982580,11983831,11987702,11996041,11997093,11997518,11998178,11999196,11999971,12000670,12001682,12003036,12005250,12008656,12008658,12008736,12008897,12009024,12011977,12012409,12013066,12013200,12013215,12013573,12015492,12016422,12016957,12032395		1_12015492_TTTACAAAAGG_T;1_12011977_AAAAT_A;			1_12032395_G_A;1_12016957_T_G;1_12016422_T_C;1_12015492_TTTACAAAAGG_T;1_12013573_G_A;1_12013215_C_T;1_12013200_C_T;1_12013066_G_A;1_12012409_A_G;1_12011977_AAAAT_A;1_12009024_A_G;1_12008897_G_C;1_12008736_G_A;1_12008658_G_A;1_12008656_A_G;1_12005250_G_A;1_12003036_G_T;1_12001682_G_A;1_12000670_T_C;1_11999971_T_C;1_11999196_C_T;1_11998178_T_G;1_11997518_G_A;1_11997093_C_T;1_11996041_A_G;			0.04950495049504952	1	1	11994262	12035595
ENSG00000083535	ENSG00000083535	ENST00000326291_PIBF1	Q8WXW3	13_73314713_G_C	rs67241368	0.0011474596656685058	5.310813672554187e-05	6.0	1.3797890246785973e-09	0.3614628017688191	2.879370689045437e-12	0.400062344701099	0.007780918664759675	0.3845152272486907	0.0007001354862624107	0.2523262875477157	False	73314713,73313825,73313960,73315266,73320455,73322235,73324751,73326915								0.4678217821782178	13	1	73356197	73590591
ENSG00000083828	ENSG00000083828	ENST00000598183_ZNF586	Q9NXT0-3	19_58288169_C_T	rs2285615	0.0058096243812392895	0.000311482056823678	6.0	9.706282343558584e-07	0.4541193573688097	0.00013657824351295263	-0.3206262786822766	0.2625409208266553	0.2271417722802891	0.2298534911933788	0.2553833737928057	False	58288169,58264424,58266192,58274425,58281192,58281374,58282878,58284193,58284213,58285378,58286025,58286059,58291847,58292416,58293990,58295118,58296102,58297596,58297689,58299928,58301275,58301410,58301766,58302271,58302359,58302683,58303091,58303795,58303850,58304365,58305701,58308415,58308701,58309296,58310330,58310895,58313844,58314677,58315734,58315847		19_58286025_TG_T;19_58281192_TC_TCC;		19_58291847_G_A;19_58281192_TC_TCC;	19_58286059_G_T;19_58286025_TG_T;19_58285378_G_A;19_58284213_T_C;19_58284193_T_C;19_58282878_C_G;19_58281374_G_A;19_58288169_C_T;			0.36386138613861385	19	1	58281023	58331307
ENSG00000083844	ENSG00000083844	ENST00000600531_ZNF264	O43296	19_57697544_A_G	rs60491693	0.012924938193976304	0.0007512436631604277	6.0	2.0666879371443533e-06	-0.42972386884861496	0.9410939161278626	-0.0028296098389831025	0.6610232652426073	-0.057216082500622274	0.6213555597123506	-0.06335270551454641	False	57697544,57693175,57717081,57717450,57722180,57732041,57732635,57734593					19_57722180_G_A;19_57717450_A_G;19_57717081_G_A;			0.3415841584158416	19	1	57702868	57724724
ENSG00000083937	ENSG00000083937	ENST00000263780_CHMP2B	Q9UQN3	3_87304561_G_A	rs1060241	2.721735523617499e-05	1.134536661456177e-06	5.0	2.775470395385466e-09	0.3203118639429777	1.6030888266790858e-11	0.4275457973509656	0.0006217384721270992	0.33027500900534923	3.1362662522558183e-06	0.3705773195899616	True	87304561,87239206,87242859,87243683,87244101,87245445,87248587,87250585,87253957,87254027,87256572,87258133,87258681,87262727,87265821,87267240,87288437,87293542,87295512,87298488,87301263,87305607,87305758,87308553,87311893,87321530,87342944,87343463,87343501,87344327,87345445,87350420,87359637,87369511,87371474,87373695,87380025,87384701,87395141,87395464,87399721		3_87288437_CT_C;		3_87304561_G_A;	3_87301263_T_C;3_87298488_A_G;3_87295512_C_G;3_87293542_G_A;3_87288437_CT_C;			0.2549504950495049	3	1	87276421	87304698
ENSG00000084072	ENSG00000084072	ENST00000495526_PPIE	Q9UNP9	1_40203722_T_C	rs12074147	5.306434806310513e-30	3.162307263229036e-33	15.0	9.047487853601619e-51	1.440831409958615	0.5287033449858551	0.03559752471234806	1.821033545331684e-07	0.204864819990432	1.308667266512018e-09	-0.4174893807984418	True	40203722,40204166,40204424,40204823,40205127,40205326,40206298,40210468,40211737,40212878,40213670,40214367,40214525,40214944,40216234,40217258,40219065,40220284,40220806,40221067,40226046		1_40205127_TAAAG_T;1_40205126_ATAAA_A;		1_40219065_C_G;	1_40226046_G_A;1_40221067_G_A;1_40220806_G_A;1_40220284_C_G;1_40219065_C_G;1_40217258_T_C;1_40216234_A_G;1_40214944_A_G;1_40214525_T_A;1_40214367_A_G;1_40213670_A_T;1_40212878_G_A;1_40211737_T_C;1_40210468_G_C;1_40206298_G_A;1_40205326_C_A;1_40205127_TAAAG_T;1_40205126_ATAAA_A;1_40204823_C_T;1_40204424_A_T;1_40204166_G_T;1_40203722_T_C;			0.3589108910891089	1	1	40157854	40229586
ENSG00000084090	ENSG00000084090	ENST00000337288_STARD7	Q9NQZ5	2_96847036_T_C	rs10171471	9.897371959436736e-09	2.1575075705507826e-10	6.0	2.938910349978509e-15	-0.3126096049625735	2.8848122746386517e-16	-0.4324335842312512	1.205329048131492	-0.15952295644309578	0.3205806635032062	-0.08505396680747335	False	96847036,96822981,96851119,96960471,96978317		2_96851114_GAAAAC_G;2_96851114_GAAAACA_G;		2_96851119_C_A;2_96851114_GAAAAC_G;2_96851114_GAAAACA_G;				0.301980198019802	2	-1	96850597	96874563
ENSG00000084207	ENSG00000084207	ENST00000398603_GSTP1	P09211	11_67353579_C_T	rs1138272	1.9541948825699913e-21	6.537989622545254e-24	9.0	5.643414322633958e-34	2.181198778642144	0.07452663991190453	-0.18342916314179272	0.8282590778795649	0.1981486296908399	0.4765270584917302	-0.08478708690577097	False	67353579,67385062	11_67353579_C_T;				11_67353579_C_T;			0.07425742574257425	11	1	67351066	67354131
ENSG00000084676	ENSG00000084676	ENST00000288599_NCOA1	Q15788-3	2_24715318_T_C	rs13002937	0.0691524072306145	0.002454332966577032	12.0	1.2049887860976967e-05	-0.22169859685672672	1.5216191880062965e-09	-0.29990460949692993	1.8349228347911468	-0.1216795378991451	0.5079206311825752	0.06379025193542731	True	24715318,24735507,24739387,24756965,24756970,24758475,24766411,24781809,24804182,24818051,24826055,24830452,24854607,24854793,24861275,24871871,24885833,24892873,24893008,24896389,24912411,24919659,24928497,24928674,24936786,24947050		2_24826055_AT_A;2_24756965_TATTA_T;			2_24947050_G_T;2_24936786_G_A;2_24928674_A_G;2_24928497_A_G;2_24919659_T_A;2_24912411_G_A;2_24896389_T_G;2_24893008_G_A;2_24892873_G_T;2_24871871_C_G;2_24861275_A_G;2_24854793_C_T;2_24854607_T_A;2_24830452_C_T;2_24826055_AT_A;2_24818051_T_C;2_24804182_A_C;2_24781809_A_G;2_24766411_A_G;2_24758475_T_C;2_24756965_TATTA_T;2_24739387_G_A;2_24735507_A_T;2_24715318_T_C;			0.3836633663366337	2	1	24714783	24993571
ENSG00000084731	ENSG00000084731	ENST00000264712_KIF3C	O14782	2_25988309_C_T	rs6546461	0.014271132258764025	0.0007184244421019763	7.0	1.0347498097619197e-06	-0.22075429477659456	5.807291029699104e-07	-0.2465459404982451	0.010586826277241914	-0.5031569797028967	0.20502129677139166	-0.14791113847819193	False	25988309,25988347								0.2524752475247525	2	-1	26149471	26205618
ENSG00000084764	ENSG00000084764	ENST00000405074_MAPRE3	Q9UPY8	2_27245475_T_C	rs7355650	0.0004402461932668882	1.2554133585670692e-05	9.0	2.685014952917474e-07	0.3992907500059204	3.4145253257536693e-07	0.3638800038091513	0.009340411160203923	0.3489217123895523	1.1888538630951907e-05	0.4156102092314684	False	27245475,27157396,27158623,27159341,27161060,27161591,27163044,27166822,27167320,27167784,27168411,27168743,27169490,27169540,27169637,27169842,27170470,27170982,27171245,27172069,27173249,27173341,27173520,27174348,27175570,27177545,27177903,27177952,27178129,27178965,27178972,27179371,27179492,27179963,27181112,27181454,27182155,27182160,27183751,27183793,27183970,27184446,27185317,27186561,271…		2_27241795_A_ATTA;2_27227706_CA_C;		2_27249245_A_C;	2_27247832_T_C;2_27244712_C_T;2_27243364_A_G;2_27241795_A_T;2_27241795_A_ATTA;2_27239949_G_T;2_27237614_A_G;2_27233859_T_C;2_27233789_T_C;2_27233467_T_C;2_27231145_G_A;2_27229892_C_A;2_27229891_TC_AA;2_27229891_T_A;2_27229891_TC_AA;2_27229372_C_G;2_27229079_A_C;2_27227707_A_G;2_27227706_CA_C;2_27226954_A_G;2_27225144_C_A;2_27224209_T_C;2_27217228_G_A;2_27217102_T_A;2_27215269_A_T;2_27213937_T_C;2…			0.3886138613861386	2	1	27193480	27250064
ENSG00000085063	ENSG00000085063	ENST00000395850_CD59	E9PNW4	11_33755956_C_T	rs3181269	1.5363428738593702e-14	7.292685113843332e-17	14.0	1.6742613467654458e-21	-0.8531043310365951	2.3197064529154305e-25	-0.999343561699078	7.937623931548692e-10	-0.7350972028372715	4.579120883109809e-13	-0.8132488230055488	False	33755956,33757770					11_33757770_G_A;11_33755956_C_T;			0.18564356435643564	11	-1	33719807	33757991
ENSG00000085231	ENSG00000085231	ENST00000380818_TAF9	Q16594	5_68628929_C_T	rs2083643	0.00032570989441059293	6.7712566263317225e-06	12.0	3.927728878160879e-09	1.3764820110732072	0.050572647891203255	0.2625139590691134	0.07721068354440369	0.2653205276969117	0.8095935023538772	0.052489958950342135	True	68628929,68636044,68636696,68637000,68637393,68637508,68638136,68639639,68639946,68646354,68650936					5_68650936_G_A;			0.05198019801980198	5	-1	68646811	68665840
ENSG00000085365	ENSG00000085365	ENST00000506858_SCAMP1	O15126	5_77707790_A_G	rs67590667	3.3400331352880075e-06	7.586966587302947e-08	8.0	1.1727540424810647e-12	-0.688957073652384	0.21776850622463834	-0.08375590495092412	0.11235209027364007	-0.2781698560752293	0.009261256787847269	-0.23054082494105946	True	77707790,77645265,77656112,77656300,77657891,77659725,77662302,77662375,77662512,77663401,77663671,77663801,77665120,77672072,77672618,77673232,77674827,77676890,77678129,77679312,77679641,77681619,77683534,77687589,77689107,77689648,77689721,77690148,77690758,77692932,77696671,77697094,77697827,77697846,77698045,77698536,77699672,77699751,77699873,77700314,77704026,77704200,77704246,77704513,777…		5_77760491_CA_C;5_77742342_TAA_T;5_77710780_CT_C;5_77705941_CT_C;5_77697846_AT_A;5_77689648_ACAGTTGAAAATGCCTATTGCTG_A;			5_77770691_C_T;5_77768488_G_C;5_77768019_C_T;5_77766135_T_C;5_77766028_A_G;5_77766019_T_C;5_77765934_T_A;5_77761238_G_A;5_77760491_CA_C;5_77760159_G_A;5_77759990_T_A;5_77759863_C_T;5_77759121_G_T;5_77757448_A_G;5_77756478_G_C;5_77753997_C_T;5_77753854_C_A;5_77753694_A_G;5_77743356_A_G;5_77742342_TAA_T;5_77740070_A_G;5_77739350_C_T;5_77737814_G_C;5_77736296_T_G;5_77735154_C_T;5_77733414_T_C;5_7772…			0.2648514851485149	5	1	77656339	77776562
ENSG00000085377	ENSG00000085377	ENST00000448705_PREP	P48147	6_105768250_G_A		8.347061236573607e-12	3.6425396499905415e-13	2.0	1.3462103181895731e-17	0.8694128168356491	0.00011694116668887381	-0.28822474666874937	1.3864736158290325e-05	0.1902426814534164	8.141004316933076e-06	-0.2427207135420213	False	105768250,105769201,105769900,105771166,105774061,105774660,105776289,105776312,105778067,105780539,105781584,105782455,105783150,105786497,105787131,105787812,105794333,105794683,105795406,105795907,105796430,105796572,105798482,105799241,105799455					6_105799455_C_T;6_105799241_T_C;6_105798482_T_C;6_105796572_T_C;6_105796430_G_A;6_105795907_C_T;6_105795406_G_A;6_105794683_C_T;6_105794333_A_G;6_105787812_A_G;6_105787131_A_G;6_105786497_T_G;6_105783150_A_C;6_105782455_A_G;6_105781584_C_G;6_105780539_C_T;6_105778067_C_T;6_105776312_C_T;6_105776289_T_C;6_105774660_C_G;6_105774061_T_C;6_105771166_C_A;6_105769900_A_T;6_105769201_C_T;6_105768250_G_A;			0.20544554455445546	6	-1	105725440	105850959
ENSG00000085449	ENSG00000085449	ENST00000233055_WDFY1	Q8IWB7	2_224802504_A_G	rs10191160	1.557107218200547e-05	5.207451019858331e-07	6.0	1.596755038346399e-10	0.42983418945942015	1.7369499804283768e-12	0.5882817904239079	8.624249454330055e-06	0.7278996386362371	3.171629243173547e-05	0.4782832674660682	False	224802504,224819470					2_224802504_A_G;			0.1311881188118812	2	-1	224720433	224810104
ENSG00000085465	ENSG00000085465	ENST00000369732_OVGP1	Q12889	1_112015292_T_C	rs12740822	0.0030129670922176967	0.0002276912910785545	4.0	1.5729175065638056e-08	0.3337220847721018	2.3598280565370474e-09	0.3343184885693132			0.1032249054156352	0.2424869941374312	False	112015292,111947430,111949063,111949282,111950546,111953642,111953735,111954258,111957097,111957693,111962944,111963268,111963356,111968316,111968327,111968487,111968743,111969294,111969719,111973893,111976889,111977133,111978790,111979028,111980355,111981648,111985229,111991845,111992095,111992823,111993224,112001035,112012037,112012139	1_111957693_A_G;1_111957097_C_G;		1_111969719_A_G;		1_111969719_A_G;1_111969294_A_G;1_111968743_A_G;1_111968487_G_A;1_111968327_T_C;1_111968316_G_A;1_111963356_C_T;1_111963268_G_C;1_111962944_C_T;			0.4084158415841584	1	-1	111956936	111970399
ENSG00000085491	ENSG00000085491	ENST00000264128_SLC25A24	Q6NUK1	1_108740419_C_T	rs828994	2.596279209895564e-17	3.206413985403837e-19	4.0	6.724030523275341e-31	-1.0710747978806472	1.8660731215709762e-35	-1.130114087266625	1.6969939845493244e-21	-1.0723052118977283	1.975168299576418e-24	-1.048994182074882	False	108740419,108734993,108735388,108735787,108737086,108737112,108737302,108737425,108737551,108737806,108738360,108738436,108738624,108739035,108739104,108739171,108739214,108739228,108739434,108739705,108739726,108739849,108740779,108741065,108742892,108742904,108742954,108743042,108743140,108743178		1_108742904_CGCGCAGG_C;1_108739434_AAAG_A;1_108738624_GAA_G;1_108737806_T_TCTAAA;1_108737086_AG_A;		1_108743178_C_G;1_108743140_C_G;1_108743042_C_A;1_108742954_A_C;1_108742904_CGCGCAGG_C;1_108742892_T_G;1_108735388_T_A;	1_108741065_T_C;1_108740779_G_A;1_108739849_C_T;1_108739705_C_T;1_108739434_AAAG_A;1_108739228_A_C;1_108739214_T_C;1_108739171_A_G;1_108739104_A_G;1_108739035_A_G;1_108738624_G_A;1_108738624_GAA_G;1_108738436_A_C;1_108738360_C_A;1_108737806_T_TCTAAA;1_108737551_T_C;1_108737425_T_C;1_108737302_C_G;1_108737112_G_A;1_108737086_AG_A;1_108735787_T_C;1_108735388_T_A;1_108734993_G_C;1_108740419_C_T;	1_108742892_T_G;1_108741065_T_C;1_108740779_G_A;1_108739849_C_T;1_108739705_C_T;1_108739434_AAAG_A;1_108739228_A_C;1_108739214_T_C;1_108739171_A_G;1_108739104_A_G;1_108739035_A_G;1_108738624_G_A;1_108738624_GAA_G;1_108738436_A_C;1_108738360_C_A;1_108737806_T_TCTAAA;1_108737551_T_C;1_108737425_T_C;1_108737302_C_G;1_108737112_G_A;1_108737086_AG_A;1_108735787_T_C;1_108735388_T_A;1_108734993_G_C;1_10…		0.19554455445544555	1	-1	108676658	108743471
ENSG00000085719	ENSG00000085719	ENST00000521271_CPNE3	O75131	8_87573120_C_T	rs1044730	0.0702824648631161	0.002142815681925667	14.0	2.318022187957016e-06	0.17697018954435653	2.353896861951971e-05	0.2368736925392045	2.409410791578958	0.12735830850455776	0.7198403088242327	-0.024668603804681943	False	87573120,87567937,87580251,87622069		8_87567937_TATTCTA_T;8_87567936_ATATTC_A;			8_87567937_TATTCTA_T;8_87567936_ATATTC_A;			0.25	8	1	87497059	87573726
ENSG00000085721	ENSG00000085721	ENST00000198767_RRN3	F5H148	16_15150773_C_G	rs12928424	4.5350565386870304e-13	5.02167936787101e-15	7.0	1.0177324721923259e-22	-0.7059828436971199	1.1420600596445219e-24	-0.8193644347108527	0.13975168067122953	-0.3159661370642506	0.6023135224603798	0.04325911438824925	False	15150773,15150833,15151361,15166232,15168760,15177695					16_15177695_T_A;16_15168760_T_C;16_15166232_A_G;			0.37376237623762376	16	-1	15153879	15188174
ENSG00000085733	ENSG00000085733	ENST00000301843_CTTN	Q14247	11_70278573_A_G	rs12795503	2.241522545535196e-28	1.6972243456695864e-31	16.0	3.4348736439240834e-38	1.4548715125022025	0.6699575661375288	-0.034688827678940465	5.713316768005241e-22	1.1467063264273076	0.7759498718914318	-0.03286439755849724	True	70278573,70251812,70253389,70253475,70257019,70257340,70260609,70261536,70263716,70264227,70264690,70265436,70265594,70266246,70267026,70267348,70268910,70270644,70271927,70272329,70273001,70273999,70274191,70274491,70274742,70275975,70276009,70276346,70276496,70278250,70279927,70280242,70280893,70281007,70285370,70286355,70288583,70290972		11_70278249_TAC_T;11_70273999_AT_A;11_70264227_CA_C;11_70256066_GGTAAGTGGCCCGCGGCTGCCTATGCCAGGCTCCTGGTGTGCTTGGACCACTAGACTGGGTGGCAGAGTCGTCCCTCAGTCTTTCCTTAGATCAGCAGTTTTGAGTCCATCTGCTGAGGTTGCGATTTGCCCGGAGTAGACCCCTGTTGATTGGACTTACTCATGAAGTACTCTAGCTTTCTTCAAAGCTCTTTAGGAATCCTCAGAGGTGCTGGAGCACGGGTGTTAGTGGGGAGGCCCAGAGAGGGAGATTGGCCCTCAGAGGCAGCCTTGTGATAGGACAGAAGTCCAGAAGCATCCTGGCTCTAGGTGTCATCACTGTCAATGCCTGTGGT…	11_70256066_GGTAAGTGGCCCGCGGCTGCCTATGCCAGGCTCCTGGTGTGCTTGGACCACTAGACTGGGTGGCAGAGTCGTCCCTCAGTCTTTCCTTAGATCAGCAGTTTTGAGTCCATCTGCTGAGGTTGCGATTTGCCCGGAGTAGACCCCTGTTGATTGGACTTACTCATGAAGTACTCTAGCTTTCTTCAAAGCTCTTTAGGAATCCTCAGAGGTGCTGGAGCACGGGTGTTAGTGGGGAGGCCCAGAGAGGGAGATTGGCCCTCAGAGGCAGCCTTGTGATAGGACAGAAGTCCAGAAGCATCCTGGCTCTAGGTGTCATCACTGTCAATGCCTGTGGTTCCAGTCTGTAGCCTAAGTCATGCCAGTCCGAAGACCAAAGTCAAATCTGTA…		11_70281007_T_C;11_70280893_G_A;11_70280242_A_G;11_70279927_G_A;11_70278250_AC_GT;11_70278250_A_G;11_70278249_TAC_T;11_70276496_G_A;11_70276346_T_C;11_70276009_A_G;11_70275975_G_T;11_70274742_A_T;11_70274491_T_C;11_70274191_G_T;11_70273999_AT_A;11_70273001_C_T;11_70272329_C_T;11_70271927_G_A;11_70270644_A_G;11_70268910_C_T;11_70267026_A_G;11_70266246_G_A;11_70265594_C_A;11_70265436_A_G;11_7026469…	11_70281007_T_C;11_70280893_G_A;11_70280242_A_G;11_70279927_G_A;11_70278250_AC_GT;11_70278250_A_G;11_70278249_TAC_T;11_70276496_G_A;11_70276346_T_C;11_70276009_A_G;11_70275975_G_T;11_70278573_A_G;	11_70253475_C_T;	0.20544554455445546	11	1	70244510	70282690
ENSG00000085871	ENSG00000085871	ENST00000506797_MGST2	Q99735-2	4_140616462_G_A	rs2646077	2.235730811548424e-08	5.070847151575171e-10	6.0	2.7347869927330856e-12	-0.8060002455439672	0.3891350796298946	0.07862379856459882	0.11831429502587022	0.2314957256599031	0.0933157884140224	0.24228000535269595	False	140616462					4_140616462_G_A;	4_140616462_G_A;		0.27722772277227725	4	1	140586922	140661899
ENSG00000085978	ENSG00000085978	ENST00000392021_ATG16L1	Q676U5	2_234194957_T_G	rs13005285	1.651837495195452e-05	1.8489751622296775e-07	18.0	2.4352145525731327e-11	0.6314129887667086	1.2622669412779904e-17	0.6618201659383834	0.00031437638342243985	0.5234409501394229	7.328090375114126e-07	0.5167665536082713	True	234194957,234143244,234144883,234148043,234154683,234166322,234167020,234170397,234173270,234199461					2_234199461_G_A;2_234173270_C_G;2_234170397_G_A;2_234167020_A_G;2_234166322_G_A;2_234154683_C_A;2_234148043_G_A;2_234144883_G_A;2_234143244_A_G;2_234194957_T_G;			0.3341584158415842	2	1	234118697	234204320
ENSG00000085982	ENSG00000085982	ENST00000450966_USP40	Q9NVE5	2_234464498_T_C	rs62192777	1.1747509302719355e-07	1.0127303327375095e-09	17.0	1.2995085338264506e-11	0.7375890787331479	2.7243575990123514e-18	1.0160321415500029	0.00871684966500045	0.3939373861436253	0.14585660917740834	0.21728008689302625	False	234464498,234361802,234475415				2_234475415_G_A;	2_234464498_T_C;			0.17574257425742573	2	-1	234384166	234475428
ENSG00000086015	ENSG00000086015	ENST00000467367_MAST2	Q6P0Q8	1_46425500_G_A	rs4420029	2.3494306452404705e-05	4.849742157606476e-07	10.0	2.7734394562591686e-10	-0.5895002081913983	0.5223371253746898	0.04690100735752699	0.24680595291268675	-0.3071104542593872	0.4529095228040708	0.07231062618549801	False	46425500,46240425,46245423,46249299,46251678,46252418,46252717,46254330,46254422,46255272,46256638,46256929,46257306,46258193,46259980,46266210,46266725,46267923,46270129,46270942,46275959,46276313,46277693,46278158,46285809,46287286,46287287,46296066,46297452,46299059,46301182,46301379,46304048,46304484,46305362,46306583,46311792,46314170,46316949,46318054,46319447,46321005,46323192,46327532,463…	1_46476587_T_G;	1_46488251_T_TCAGTGAAGC;1_46455423_T_TC;1_46402906_CT_C;1_46359271_TA_T;1_46311792_AT_A;1_46304484_GT_G;1_46299059_G_GTTC;1_46297452_GT_G;1_46297451_AG_A;			1_46495024_G_A;1_46488251_T_TCAGTGAAGC;1_46484421_G_C;1_46478496_A_G;1_46477326_G_C;1_46476587_T_G;1_46472734_G_A;1_46472153_G_A;1_46462059_T_C;1_46461178_A_G;1_46460788_G_A;1_46458298_A_G;1_46457250_T_C;1_46455423_T_TC;1_46452823_A_C;1_46451739_A_G;1_46449291_A_G;1_46447049_T_G;1_46446096_A_G;1_46445944_T_C;1_46445257_G_A;1_46442678_T_C;1_46440252_A_C;1_46437192_A_C;1_46432999_A_C;1_46423300_T_A…		1_46500613_T_A;	0.2747524752475248	1	1	46252659	46501796
ENSG00000086061	ENSG00000086061	ENST00000544625_DNAJA1	P31689	9_32938859_T_C	rs7868944	1.1066509833680884e-08	3.634818714485282e-10	4.0	3.7604960223760855e-13	-0.6559585399708519	0.9602523007692172	-0.0035252708307471656	1.5626613405991396	-0.3697450128493154	0.5300321950293594	0.04312216405245462	False	32938859,32932460,32934617,32936039,32940528,32943766,32958092,32958984,32961108,32974570,32975210,32982448,32982687,32984391,32986248,32986405,32990232,32991777,32993820,32996370,32998888,32999419,33004375,33004417,33009855,33010550,33012382,33013943,33013962,33017138,33018423,33024958,33025251,33026638,33029015,33030244,33031430,33035114,33035246,33037349,33037350,33038049,33039024,33041532,330…		9_33030244_A_AA;		9_33039024_T_A;9_33025251_G_C;	9_33038049_G_C;9_33037350_C_A;9_33037349_T_A;9_33035246_A_G;9_33035114_A_G;9_33031430_G_T;9_33030244_A_AA;9_33029015_C_T;9_33026638_G_A;			0.4727722772277228	9	1	33025209	33039905
ENSG00000086062	ENSG00000086062	ENST00000379731_B4GALT1	P15291	9_33178815_T_C	rs10971437	0.0034979444195725557	0.0003575292520122973	3.0	7.5837316107306e-07	-0.5258933210445221	2.5554578016371913e-09	-0.7200707012243321	0.4543389430189277	-0.3465245349385013	0.2824375141347334	-0.19588022193411792	False	33178815,33114932,33116517,33119962,33123851,33127686,33144933,33149268,33154108,33157634,33160779,33166615,33169681,33171137,33172181,33172637,33174464,33174654,33180671,33185620,33187897					9_33166615_T_C;9_33160779_A_T;9_33157634_T_C;9_33154108_C_T;9_33149268_A_T;9_33144933_G_A;9_33127686_C_T;9_33123851_C_T;9_33119962_G_T;9_33116517_A_C;			0.05198019801980198	9	-1	33104080	33167354
ENSG00000086232	ENSG00000086232	ENST00000199389_EIF2AK1	Q9BQI3-2	7_6065194_G_A	rs17343667	8.733724063980987e-24	1.727421430993179e-26	11.0	3.081715312032925e-33	0.7421014722369309	3.0918567135723716e-35	1.123118070161981	0.0081225327665392	0.2781985861000247	0.1089570166862418	0.15055113624599434	False	6065194,6026988,6029748,6030287,6031101,6035428,6038045,6038722,6040631,6041818,6041836,6042522,6045385,6051368,6052638,6053054,6055882,6057068,6061915,6063283,6064799,6066783,6070528,6071060,6073644,6074199,6075823,6079951,6090727,6092365,6092639,6094701,6097229,6097667,6098301,6099488,6099699,6099966,6101062,6101068,6101800,6102034,6102055,6102600,6102719,6102951		7_6097229_TA_T;7_6092364_CG_CA;7_6073248_GTCTCGCTCTGTCGCCCAGGCTGGAGTGCAGTGGCACCATTCTCCTGGGTTCACGCCATTCTCCTGCCTCAGCCTCCCAAGTAGCTGGGACTACAGGCGCCTGCCACCACGCCTGGCTAATTTTTTGTATTTTTAGTAGAGATGGGGTTTCACCATGTTAGCCAGGATAGTCTCAATCTCCTGACCTCGTGATCCGTCCACCTCAGCCTCCCAAAGTGCTGGGATTACAGGCGTGAGCCGCCGTGCCTGGCCGACAATGGATTTTCTTGTTTATTACTCTCCACTAGAAGGTAAGCCGCATGAAAGAGAAGTTGACCTTGTGCACCACTGTATCTCCAGCACCTCAACCAAATCAATG…		7_6063283_C_T;7_6061915_T_C;	7_6098301_C_T;7_6097667_T_A;7_6097229_T_A;7_6097229_TA_T;7_6094701_C_T;7_6092639_G_T;7_6092365_G_A;7_6092364_CG_CA;7_6090727_C_T;7_6079951_C_T;7_6075823_A_T;7_6074199_C_G;7_6073644_G_A;7_6073248_GTCTCGCTCTGTCGCCCAGGCTGGAGTGCAGTGGCACCATTCTCCTGGGTTCACGCCATTCTCCTGCCTCAGCCTCCCAAGTAGCTGGGACTACAGGCGCCTGCCACCACGCCTGGCTAATTTTTTGTATTTTTAGTAGAGATGGGGTTTCACCATGTTAGCCAGGATAGTCTCAATCTCCTGACCTCGTGATCCGTCCACCTC…			0.4084158415841584	7	-1	6061881	6098861
ENSG00000086289	ENSG00000086289	ENST00000559325_EPDR1	Q9UM22	7_37989775_T_C	rs1450851	0.000273600796848169	1.350304567836882e-05	5.0	2.256406072592281e-09	-0.3797107766797829	6.1529954156591195e-09	-0.3694654602545784	0.16108704619478195	-0.3704166547143912	0.032684208512438966	-0.3035903718592601	False	37989775					7_37989775_T_C;			0.301980198019802	7	1	37723446	37991543
ENSG00000086598	ENSG00000086598	ENST00000262225_TMED2	Q15363	12_124100423_A_G	rs11615300	0.005675507170894533	0.0003640815820990212	5.0	1.2716281774361113e-07	0.2735500395515526	9.882473680498133e-09	0.3269521500478361	0.09549618035103848	0.21218736540021774	0.022978202865563086	0.170723743283143	False	124100423,124058489,124062743,124063891,124065416,124068361,124069667,124070214,124071728,124082240,124083562,124083898,124085502,124086448,124086449,124092814,124096673,124098213,124099925,124101347,124101858,124104460,124107015,124108296,124108699,124109988,124110122,124111999,124114552,124119983,124120991,124126086,124126339,124126724,124129809,124131727,124131929,124134656,124137485,124138346…				12_124082240_C_A;12_124070214_A_G;	12_124071728_C_T;12_124070214_A_G;12_124069667_A_G;			0.3762376237623761	12	1	124069078	124083116
ENSG00000087008	ENSG00000087008	ENST00000503233_ACOX3	O15254	4_8368604_C_T	rs708244	0.00043853963563289495	1.4049309957128884e-05	8.0	5.228441985243807e-09	0.4295814326721768	0.06278698750880066	0.1744218340566397	0.000898215655265985	0.5435782472105883	3.5217445658238364e-06	0.3994310610257377	False	8368604,8368039,8368433,8368869				4_8368433_G_A;4_8368039_C_T;4_8368604_C_T;	4_8368869_C_T;			0.31683168316831684	4	-1	8368009	8442450
ENSG00000087076	ENSG00000087076	ENST00000599157_HSD17B14	M0R2R3	19_49329285_G_A	rs4802511	0.01765011859601054	0.0015902129904192036	4.0	3.949068809132769e-06	-0.470178987306181	0.6565620343231195	-0.028394503303749537	0.6006963086134878	0.11241759574921416	0.2302105383910803	-0.2782212060710207	False	49329285,49302286,49302323,49303070,49303740,49303827,49304059,49304660,49306276,49307315,49307939,49313000,49314782,49317710,49317785,49319004,49321911,49325017,49325859,49326464,49328961,49334479,49334991		19_49325017_GGAT_G;19_49317785_AAAAG_A;			19_49334991_C_T;19_49334479_T_A;19_49328961_T_C;19_49325859_G_C;19_49325017_GGAT_G;19_49321911_G_A;19_49319004_C_A;19_49317785_AAAAG_A;19_49317710_C_T;19_49329285_G_A;		19_49334991_C_T;	0.2202970297029703	19	-1	49316274	49339935
ENSG00000087077	ENSG00000087077	ENST00000429658_TRIP6	Q15654	7_100511253_A_C	rs11978697	0.06261096609096567	0.003283540873419116	8.0	1.5850034828302974e-05	0.32704286596532245	0.8284347797403231	-0.012258007880104164	0.3273183535319593	0.34921404003483725	0.4437672542769784	-0.042660645285024335	True	100511253,100440598,100446235,100452524,100457344,100458049,100458795,100462004,100462159,100462332,100462565,100468284,100468398,100471272,100473729,100476229,100476324,100482026,100483078,100483731,100486035,100486656,100488658,100489639,100493998,100496012,100496060,100499142,100499326,100499533,100500105,100500188,100500745,100500781,100501126,100501291,100501733,100501755,100504904,100505611…				7_100468284_A_G;	7_100468398_T_C;	7_100468284_A_G;	7_100468284_A_G;	0.4678217821782178	7	1	100464760	100471076
ENSG00000087086	ENSG00000087086	ENST00000331825_FTL	P02792	19_49261038_A_G	rs1688263	0.003229065260413905	0.0009829241230241337	1.0	8.968159267617979e-06	0.3471828448003268	1.8892845817897975e-05	0.2674465095287733	1.2900500216899324	0.3002177930293177	0.9392525499729192	0.008786135257844774	True	49261038,49261638,49261654,49261762								0.2920792079207921	19	1	49468558	49470135
ENSG00000087087	ENSG00000087087	ENST00000432932_SRRT	H7C3A1	7_100492322_C_T	rs3808356	5.7010117142792175e-05	6.947637710820161e-07	18.0	5.232651547898047e-11	0.5175393987180249	0.6291986422373294	-0.02180728385247951	1.1513444357452791	0.4882535328017088	0.7297777483184942	-0.018666676182941933	False	100492322,100451732,100456163,100461565,100466441,100468103,100471121,100472826,100492298,100494922,100499789,100500615,100512536								0.2376237623762376	7	1	100472733	100486285
ENSG00000087088	ENSG00000087088	ENST00000513217_BAX	Q07812-2	19_49459104_A_G	rs1805419	5.671910349897461e-05	9.5647953909189e-07	13.0	2.733651226062216e-11	-0.7077295266632491	0.21057150647306688	0.09114981555004792	0.6007080596104002	-0.2940437143091079	0.2882821699610777	0.08562980534898346	True	49459104					19_49459104_A_G;	19_49459104_A_G;		0.2599009900990099	19	1	49458072	49465055
ENSG00000087157	ENSG00000087157	ENST00000586510_PGS1	Q32NB8	17_76370557_C_T	rs12951460	7.760249195535226e-06	9.247356464627882e-08	16.0	5.421279201275967e-13	0.6707133492453201	2.026084952203274e-06	-0.2853481849917353	0.7875033637052131	0.13623706115000145	0.24484510680830124	-0.1153696258186654	False	76370557,76369480,76370896,76375095,76377482,76378869,76379332,76381021,76382079,76382791,76387244,76387363,76390080,76391653,76392144,76393030,76393372,76393413,76398304,76401328,76402105,76403984,76404189		17_76404189_ATCAG_A;17_76379332_CT_C;	17_76378869_G_A;		17_76404189_ATCAG_A;17_76403984_G_A;17_76402105_A_T;17_76401328_C_T;17_76398304_G_A;17_76393413_G_A;17_76393372_A_G;17_76393030_T_C;17_76392144_G_A;17_76391653_C_T;17_76390080_C_T;17_76387363_G_T;17_76387244_A_G;17_76382791_C_T;17_76382079_C_T;17_76381021_C_T;17_76379332_CT_C;17_76378869_G_A;17_76377482_T_G;17_76375095_A_G;	17_76404189_ATCAG_A;17_76403984_G_A;17_76402105_A_T;17_76401328_C_T;17_76398304_G_A;17_76393413_G_A;17_76393372_A_G;17_76393030_T_C;17_76392144_G_A;17_76391653_C_T;17_76390080_C_T;17_76387363_G_T;17_76387244_A_G;17_76382791_C_T;17_76382079_C_T;17_76381021_C_T;17_76379332_CT_C;17_76378869_G_A;17_76377482_T_G;17_76375095_A_G;		0.4752475247524752	17	1	76374721	76421195
ENSG00000087191	ENSG00000087191	ENST00000585242_PSMC5	P62195	17_61812995_T_G	rs6504179	0.0007217276551297143	9.17207183457854e-06	21.0	2.766148801102605e-10	-0.5781775750045401	0.007932367242175978	0.138967952872838	0.2341818728992831	-0.2190970044668572	0.28354537715315553	-0.09071614637697167	True	61812995,61776479,61779927,61782325,61784963,61785374,61788634,61791210,61793818,61794839,61795328,61795439,61796306,61797515,61797862,61797873,61798604,61798724,61799198,61799840,61802049,61802378,61802612,61805607,61805747,61806138,61807170,61811920,61812655,61812733,61813169,61813906,61814762,61816590,61817124,61819222,61819960,61820902,61821161,61822223,61822394,61823899,61824667,61826980,618…		17_61908055_CT_C;	17_61906846_T_C;	17_61908271_C_T;17_61904728_G_A;17_61904724_T_C;17_61904546_A_G;	17_61908271_C_T;17_61908055_CT_C;17_61906846_T_C;17_61904728_G_A;17_61904724_T_C;	17_61908271_C_T;17_61908055_CT_C;17_61906846_T_C;	17_61908271_C_T;	0.297029702970297	17	1	61904512	61909379
ENSG00000087206	ENSG00000087206	ENST00000512031_UIMC1	Q96RL1	5_176448139_T_C	rs58279426	1.3878791026129858e-11	8.30355018657342e-14	15.0	2.1114973172044005e-21	-0.9106564385634188	0.11521384033278476	0.13150348772932186	4.094082280832784e-05	-0.20657883389679954	0.052088966529442775	0.16552251496271486	True	176448139,176323298,176324729,176326721,176327644,176333126,176333748,176334195,176335231,176338955,176339209,176339499,176342242,176349386,176351330,176352736,176355312,176355884,176358065,176360528,176363429,176364039,176370988,176372593,176376493,176378574,176395190,176399919,176402401,176403023,176403170,176404962,176410426,176413570,176415964,176417386,176418927,176421956,176424035,176424141…		5_176424141_ACT_A;5_176424140_AAC_A;5_176424033_GCA_G;5_176403170_A_AT;5_176399919_CT_C;5_176360528_AT_A;5_176342242_CT_C;		5_176378574_G_T;	5_176445698_T_C;5_176445494_A_T;5_176445169_T_C;5_176444861_C_T;5_176441214_C_T;5_176441199_G_A;5_176440229_G_T;5_176434440_G_A;5_176433063_C_T;5_176432947_C_G;5_176432585_T_C;5_176431759_C_G;5_176430723_T_C;5_176429898_T_C;5_176429169_A_G;5_176425581_A_C;5_176425281_G_A;5_176424611_A_G;5_176424141_ACT_A;5_176424140_AAC_A;5_176424035_A_G;5_176424033_GCA_G;5_176418927_C_T;5_176417386_C_G;5_1764159…	5_176433063_C_T;5_176432947_C_G;5_176432585_T_C;5_176431759_C_G;5_176430723_T_C;5_176429898_T_C;5_176429169_A_G;5_176425581_A_C;5_176425281_G_A;5_176424611_A_G;5_176424141_ACT_A;5_176424140_AAC_A;5_176424035_A_G;5_176424033_GCA_G;5_176418927_C_T;5_176417386_C_G;5_176415964_A_G;5_176413570_C_G;5_176410426_G_A;5_176404962_A_G;5_176403170_A_C;5_176403170_A_AT;5_176403023_A_G;5_176402401_G_A;5_176399…	5_176402401_G_A;5_176378574_G_T;	0.4900990099009901	5	-1	176332006	176449634
ENSG00000087253	ENSG00000087253	ENST00000564084_LPCAT2	Q7L5N7	16_55583149_T_A	rs565460933	0.05560941175126824	0.002877110091047885	8.0	5.36542132222582e-05	-0.44812986428815066	0.8370857522186523	0.015830684628810827	0.2731512861707567	-0.04438898264214952	0.6464063672522009	-0.056497909072739994	False	55583149					16_55583149_T_A;			0.2103960396039604	16	1	55542910	55620582
ENSG00000087263	ENSG00000087263	ENST00000566157_OGFOD1	Q8N543	16_56545175_T_C	rs11373	0.0001329583400878748	2.827721161168313e-06	11.0	1.0195861143102429e-08	-0.6612927846626724	0.09985183223018346	-0.14731902583644274	0.2449067491644715	-0.3362380678621341	0.1395071505227485	-0.1344184507023165	False	56545175,56459589,56459727,56471410,56490549,56493176,56493573,56525060,56528169,56528297,56542121,56556758,56564386,56570421					16_56493573_C_T;16_56493176_A_G;16_56490549_G_A;	16_56493573_C_T;16_56493176_A_G;16_56490549_G_A;		0.17326732673267325	16	1	56485402	56513012
ENSG00000087274	ENSG00000087274	ENST00000398125_ADD1	P35611-3	4_2897274_C_T	rs2237004	0.001328058812804412	1.3349987981991456e-05	28.0	8.92821109945139e-09	-0.4735504071516759	0.5121770618409445	0.05010903936405995	0.633802923971598	-0.4572685036513673	0.8560243548237909	0.021762545208436457	False	2897274,2849168,2852462,2854613,2863714,2874743,2875140,2876069,2878074,2881109,2887091,2887584,2887588,2892412,2901349,2901851,2902310,2903708,2904203,2905652,2906285,2906453,2906707,2909194,2910618,2912140,2915368,2915369,2916762,2917608,2917974,2922629,2924410,2928125,2928413,2929023,2934308,2935251,2936641,2936680,2937485,2938419,2939018	4_2916762_C_G;4_2906707_G_T;	4_2915369_G_GT;4_2915368_G_GT;4_2906742_GGTGTGGACGAACATTACACACGATCACGTGAAACCCTTGCTGCAGTCTCTCTCGTCCGGTGTCTGCGTGCCAAGCTGTATTACCAACTGCTTGGTCTGTGCCTACCTTACTGTTCATAGTTAGATGACGTAGAGCAAGTTGGGTAGCTGGGGCTTCGGAGGCTTTGGGAATCCAGCCTTTCTGACCCAGGTGTAAAGCGAACCTTCCTTATTCACTTTCTTGTAGTCTGAACCTAAGTCCACTGAATGCATTACTAAAATTCGGATAATACTATCTGCTTGAAACTGCTTAAGATGTAATGTAACTCCGCAGTAGTTCCAGTATATCTCCGTATATAGCAAAAATATACAATAATTTA…	4_2906742_GGTGTGGACGAACATTACACACGATCACGTGAAACCCTTGCTGCAGTCTCTCTCGTCCGGTGTCTGCGTGCCAAGCTGTATTACCAACTGCTTGGTCTGTGCCTACCTTACTGTTCATAGTTAGATGACGTAGAGCAAGTTGGGTAGCTGGGGCTTCGGAGGCTTTGGGAATCCAGCCTTTCTGACCCAGGTGTAAAGCGAACCTTCCTTATTCACTTTCTTGTAGTCTGAACCTAAGTCCACTGAATGCATTACTAAAATTCGGATAATACTATCTGCTTGAAACTGCTTAAGATGTAATGTAACTCCGCAGTAGTTCCAGTATATCTCCGTATATAGCAAAAATATACAATAATTTACATGTATTAACCTACAAATAGGAGCTCTTC…		4_2929023_T_C;4_2928413_T_C;4_2928125_C_T;4_2924410_C_T;4_2922629_T_C;4_2917974_G_C;4_2917608_G_A;4_2916762_C_G;4_2915369_G_GT;4_2915368_GG_GTT;4_2915368_GG_GTT;4_2915368_G_GT;4_2912140_G_T;4_2910618_C_T;4_2909194_G_A;4_2906742_GGTGTGGACGAACATTACACACGATCACGTGAAACCCTTGCTGCAGTCTCTCTCGTCCGGTGTCTGCGTGCCAAGCTGTATTACCAACTGCTTGGTCTGTGCCTACCTTACTGTTCATAGTTAGATGACGTAGAGCAAGTTGGGTAGCTGGGGCTTCGGAGGCTTTGGGAA…	4_2892412_G_A;4_2887588_T_C;4_2887584_G_A;4_2887091_G_T;4_2881109_G_A;4_2878074_C_T;4_2876069_A_C;4_2875140_C_T;4_2874743_C_T;4_2863714_A_G;4_2854613_A_T;4_2854612_TA_T;4_2852462_A_G;4_2849168_C_T;		0.1485148514851485	4	1	2845584	2931803
ENSG00000087299	ENSG00000087299	ENST00000421284_L2HGDH	Q9H9P8	14_50699868_A_C	rs1955926	1.8388859241369805e-09	3.096017232895209e-11	7.0	6.2732567200119175e-12	-0.4779546681895179	1.6672709521927022e-11	-0.4589404320018122	0.0002567212800653126	-0.4364716018044925	5.713713708866128e-06	-0.3475583371254665	False	50699868,50568995,50569243,50601784,50714274,50714985,50722359,50726304					14_50726304_T_C;14_50722359_A_C;14_50714985_T_C;14_50714274_C_T;			0.38613861386138615	14	-1	50704281	50779266
ENSG00000087301	ENSG00000087301	ENST00000281741_TXNDC16	Q9P2K2	14_52964368_C_T	rs55649233	7.901623237651554e-16	1.1152608662881518e-17	4.0	1.1010966712579763e-22	-0.9759134028228241	2.197218525785569e-22	-1.2727792046796211	0.0973348682702026	-0.6473084640211342	0.6462566531180839	-0.061641397265992826	False	52964368,52898076,52900800,52905309,52908825,52910297,52910793,52910938,52911293,52912750,52915878,52917209,52920540,52921403,52922346,52923622,52924277,52927637,52929575,52930165,52932197,52934133,52939011,52939205,52939584,52953137,52954555,52955808,52956192,52957353,52957988,52958053,52965219,52967604,52967658,52967659,52970497,52970939,52970947,52972249,52973142,52973970,52976301,52977272,529…		14_52994641_GA_G;14_52982344_TTCTTC_T;14_52977272_A_AG;14_52976301_G_GAT;14_52954555_AAG_A;		14_52929575_T_A;14_52898076_A_G;	14_53018790_C_T;14_53018477_T_C;14_53016948_C_T;14_53015992_A_G;14_53012547_C_T;14_53008971_A_G;14_53008120_A_C;14_53007210_G_A;14_53006690_T_C;14_53000646_A_G;14_52999165_T_C;14_52994641_GA_G;14_52994049_A_G;14_52993003_C_T;14_52992409_C_T;14_52985156_A_C;14_52982666_A_C;14_52982662_T_G;14_52982581_T_G;14_52982344_TTCTTC_T;14_52980672_A_G;14_52979684_C_T;14_52979293_T_A;14_52979292_C_T;14_529790…	14_52934133_C_A;14_52932197_C_T;14_52930165_C_T;14_52929575_T_A;14_52927637_G_T;14_52924277_T_A;14_52923622_A_G;14_52922346_C_T;		0.08168316831683169	14	-1	52897308	53019240
ENSG00000087302	ENSG00000087302	ENST00000556760_C14orf166	Q9Y224	14_52461497_T_C	rs8014096	1.55007851245783e-05	4.440776731089492e-07	7.0	1.7167728332500376e-11	-0.9998702602247792	0.3389222742228976	0.05392571034510296	0.3122209465217802	-0.3095945405260625	0.6081480652763671	-0.059761889613445314	True	52461497,52453659,52453791,52453795,52454232,52459241,52463697,52464870,52470228,52470889,52471263,52477059,52478658,52479077,52480752,52482236,52482274,52482698,52483034,52483699,52484350,52485244,52485697,52486123,52486268,52486371,52486579					14_52470889_A_G;14_52470228_G_C;14_52464870_A_C;14_52463697_T_C;14_52459241_T_G;14_52461497_T_C;	14_52464870_A_C;14_52463697_T_C;14_52459241_T_G;14_52461497_T_C;		0.1188118811881188	14	1	52456193	52471420
ENSG00000087303	ENSG00000087303	ENST00000216286_NID2	Q14112-2	14_52589352_G_C	rs10151225	2.9491262496937918e-08	1.3516539582419989e-09	3.0	1.8017861847361267e-14	-0.4682376004229596	6.213057739138444e-14	-0.4782217089413116	0.00011068548167140657	-0.9581991179202458	0.04152393120897742	-0.3128396394540358	False	52589352,52591577,52609514,52610778,52613711,52614570,52615506,52615986								0.4108910891089109	14	-1	52471521	52535712
ENSG00000087448	ENSG00000087448	ENST00000381271_KLHL42	Q9P2K6	12_27870676_G_A	rs4930933	0.010171495827198935	0.0008643737632499683	4.0	4.0517224253846933e-07	0.27305403300728964	5.791694820711665e-07	0.3452958378501068	0.2274345657383376	-0.2338550237328043	0.7240648222943532	-0.05549465612309712	False	27870676								0.1782178217821782	12	1	27932953	27955973
ENSG00000087470	ENSG00000087470	ENST00000452533_DNM1L	O00429	12_32841294_G_C	rs7305407	1.2809022952793275e-07	6.317631488517973e-10	30.0	5.418047074575495e-16	-0.5997481522419529	2.4330285265107217e-06	-0.3732021181040833	1.5029545139764084	-0.22024294170975434	0.9303849819761802	0.046106073733934494	True	32841294,32819180,32822103,32824887,32825282,32826516,32826592,32828462,32828466,32828480,32828959,32828976,32829221,32829228,32829576,32829754,32829980,32830040,32830114,32830149,32830300,32831091,32831195,32831342,32831346,32832869,32832873,32832897,32832990,32833155,32834930,32834931,32835090,32835100,32835123,32835309,32835383,32835403,32835433,32836424,32836720,32837000,32837310,32837534,328…	12_32860302_G_A;	12_32896364_AGA_A;12_32896364_AGA_A;12_32896162_ATT_A;12_32892089_GAC_G;12_32890317_CATTT_C;12_32890310_ATTTAAGCATTTA_A;12_32890309_GATTTAAGCATTT_G;12_32884187_AAAAAGCATTTTTCATG_A;12_32883555_T_TACTA;12_32878009_TTTC_T;12_32875804_T_TTAAA;12_32868663_CA_C;12_32863552_CAAA_C;12_32855975_GTCTTTCTC_G;12_32855911_C_CACTA;12_32853073_GAGA_G;12_32852986_GCAAAAAC_G;12_32852909_C_CAAATCTAT;12_32852245_TA…	12_32860302_G_A;	12_32897586_G_A;12_32897557_G_T;12_32897437_T_C;12_32897088_A_T;12_32896615_C_G;12_32896366_A_T;12_32896365_GA_CT;12_32896364_AGA_A;12_32896365_GA_CT;12_32896365_G_C;12_32896364_AGA_A;12_32875406_A_G;12_32860302_G_A;12_32854366_A_C;	12_32896162_ATT_A;12_32894781_C_T;12_32894729_C_T;12_32894603_G_A;12_32894269_G_C;12_32894258_C_T;12_32894215_C_G;12_32894129_C_T;12_32892678_C_T;12_32892089_GAC_G;12_32890343_G_A;12_32890317_CATTT_C;12_32890310_ATTTAAGCATTTA_A;12_32890309_GATTTAAGCATTT_G;12_32890161_C_T;12_32889162_T_C;12_32887272_T_C;12_32886193_C_T;12_32886015_T_C;12_32885110_G_A;12_32884187_AAAAAGCATTTTTCATG_A;12_32883555_T_T…	12_32896615_C_G;12_32896366_A_T;12_32896365_GA_CT;12_32896364_AGA_A;12_32896365_GA_CT;12_32896365_G_C;12_32896364_AGA_A;12_32896162_ATT_A;12_32894781_C_T;12_32894729_C_T;12_32894603_G_A;12_32894269_G_C;12_32894258_C_T;12_32894215_C_G;12_32894129_C_T;12_32892678_C_T;12_32892089_GAC_G;12_32890343_G_A;12_32890317_CATTT_C;12_32890310_ATTTAAGCATTTA_A;12_32890309_GATTTAAGCATTT_G;12_32890161_C_T;12_3288…	12_32875406_A_G;12_32860302_G_A;12_32854366_A_C;	0.1311881188118812	12	1	32832134	32898486
ENSG00000087586	ENSG00000087586	ENST00000420474_AURKA	O14965	20_54964361_G_A	rs2180691	2.973307841365539e-09	2.600407856018353e-11	14.0	1.0791901562803398e-20	-0.9262773267169779	0.18540467039289327	-0.0978573635310507	1.0260812692687016	-0.3605336593111213	0.3683185440751613	0.11236863569128563	True	54964361,54957563,54963739			20_54963739_T_G;		20_54963739_T_G;20_54957563_G_C;20_54964361_G_A;			0.19801980198019808	20	-1	54944445	54967393
ENSG00000087884	ENSG00000087884	ENST00000393427_AAMDC	E9PNP3	11_77700152_A_G	rs11607512	0.0044414061732301145	0.00012622973854756788	11.0	1.0507901931517234e-07	0.547873556170142	0.007206419624209074	0.2454468273049361	0.0984036210641617	0.26760573172536484	0.02927795277586883	0.26337898910830937	False	77700152,77615428,77616578,77617433,77627431,77639466,77640120,77641273,77641481,77644180,77644646,77644824,77644915,77645505,77648682,77652420,77653789,77655620,77655858,77659222,77659512,77661518,77662280,77662362,77665339,77666487,77668019,77668074,77669985,77670112,77670237,77671217,77671544,77673898,77675723,77678541,77684136,77685597,77685936,77688940,77689297,77692775,77695894,77697406,776…					11_77627431_G_C;11_77617433_G_A;11_77616578_C_T;11_77615428_T_C;			0.2549504950495049	11	1	77532155	77629478
ENSG00000088035	ENSG00000088035	ENST00000263440_ALG6	A2A2G4	1_63848408_G_A	rs112203355	3.0729069221214863e-06	7.951535201913984e-08	7.0	1.541027133215219e-11	-0.6679017643969101	3.824239297302632e-15	-0.9284706110327784	0.0005422855940156932	-0.35113289097773936	4.523237167416373e-05	-0.3338093194889851	False	63848408,63904661,63934318,64045528					1_63848408_G_A;	1_63848408_G_A;		0.10891089108910892	1	1	63833261	63904233
ENSG00000088205	ENSG00000088205	ENST00000461443_DDX18	Q9NVP1	2_118583940_C_T	rs2303348	5.376047062838183e-15	5.5223254546522526e-17	6.0	1.836674651341334e-27	0.9927562375930226	0.03656743424923697	-0.16726678272023307	0.00023369201356556517	0.4548908340450368	0.4470503176800933	0.06079481929198805	False	118583940,118511326,118512900,118515020,118522223,118526064,118526981,118529022,118529921,118534260,118534583,118535137,118536162,118542159,118545657,118546162,118546981,118553562,118554863,118555147,118555694,118555803,118557033,118557805,118559968,118561693,118567340,118569556,118571233,118571795,118572958,118581833,118585420,118591296,118592086,118593180,118601871,118603466,118603765,118606275					2_118585420_T_G;2_118581833_A_G;2_118572958_C_G;		2_118583940_C_T;	0.4282178217821782	2	1	118572226	118589955
ENSG00000088280	ENSG00000088280	ENST00000478858_ASAP3	Q8TDY4-3	1_23781509_G_A	rs4649089	1.6936758942367382e-16	8.0045844320335155e-19	11.0	1.2846738489621384e-26	-0.9632553032240976	0.010258314852275718	0.1564569742355472	0.2315731278623487	-0.548938465177871	0.9338530145240904	0.006815560394739961	False	23781509,23751140,23775548,23778362,23781642,23786203,23794782,23796004,23799001,23804917,23805775,23810360,23810658,23811061,23811488		1_23805775_AGAG_A;1_23805774_CAG_C;1_23775548_GTC_G;		1_23810658_G_A;	1_23810658_G_A;1_23810360_T_C;1_23805775_AGAG_A;1_23805774_CAG_C;1_23804917_C_T;1_23799001_C_T;1_23796004_G_A;1_23794782_G_C;1_23786203_C_T;1_23781642_C_T;1_23778362_C_T;1_23775548_GTC_G;1_23781509_G_A;			0.3811881188118812	1	-1	23755056	23811061
ENSG00000088298	ENSG00000088298	ENST00000540582_EDEM2	Q9BV94-2	20_33885892_A_T	rs8114520	0.020545578786049352	0.0015079323879669249	5.0	3.666038123806073e-05	0.3301751296113241	0.6419786430206252	-0.033079001825995845	0.5877183840930915	0.18990806393440002	0.3293019267896598	0.20048429923709365	False	33885892								0.150990099009901	20	-1	33703167	33865928
ENSG00000088367	ENSG00000088367	ENST00000373946_EPB41L1	Q9H4G0	20_34759937_G_A	rs73101486	4.4229432809511005e-10	2.8367501220762377e-12	17.0	1.85722549886346e-15	-0.6908813664316911	1.0197109806336465e-06	-0.4442186938292064	0.3608751376074039	-0.4640428324839368	0.8159169992517605	0.03652336644268983	False	34759937,34650632,34652984,34660780,34661045,34668358,34677439,34681528,34683190,34686075,34687450,34689247,34697305,34701126,34702435,34702658,34709016,34710504,34715437,34716048,34718026,34722115,34722255,34731767,34750363,34759055,34803305,34804938,34811689,34819919,34820647,34822315,34829868,34829942,34832601,34836418,34841919,34846320,34846442		20_34759055_CT_C;		20_34820647_C_T;20_34819919_T_C;	20_34811689_G_C;20_34804938_G_A;20_34803305_C_T;20_34759055_CT_C;20_34750363_C_G;20_34722255_G_T;20_34722115_C_G;20_34718026_A_G;20_34716048_T_C;20_34715437_A_G;20_34710504_G_C;20_34709016_C_A;20_34702658_C_G;20_34702435_C_T;20_34701126_T_C;20_34697305_A_G;20_34689247_G_A;20_34687450_T_A;20_34686075_G_T;20_34683190_G_T;20_34681528_G_A;20_34759937_G_A;			0.19554455445544555	20	1	34679426	34820721
ENSG00000088448	ENSG00000088448	ENST00000489973_ANKRD10	Q9NXR5	13_111537606_G_A	rs7332021	0.0005969018426807231	1.305269359190674e-05	12.0	7.348840019293556e-10	-0.3975191707379685	0.12855552820704266	0.10352260293706878	1.247475113172555	-0.1478680474420102	0.8030570637046569	0.02120767013605129	False	111537606,111528111,111528118,111528251,111529054,111529921,111530168,111530358,111531264,111531483,111531742,111531885,111533812,111534577,111536476,111536743,111537692,111538047,111538525,111538590,111539159,111539925,111540560,111540676,111541321,111541455,111541678,111542313,111542315,111543043,111543106,111543622,111544204,111547099,111547130,111547210,111547760,111548261,111549334,111549722…		13_111557469_CACTT_C;13_111555219_TG_T;13_111552432_AG_A;13_111549334_TA_T;13_111547099_CTT_C;13_111544204_CCTT_C;13_111542312_GC_G;13_111541678_ACT_A;13_111541455_C_CTT;13_111533812_CT_C;13_111537605_AG_A;		13_111567385_T_C;13_111531885_C_A;13_111531742_A_G;13_111531483_G_A;13_111531264_C_T;	13_111566098_C_T;13_111565064_A_G;13_111562803_T_C;13_111562398_G_A;13_111562280_A_G;13_111561798_C_T;13_111559791_C_G;13_111557849_A_C;13_111557469_CACTT_C;13_111557399_G_A;13_111555592_G_A;13_111555372_A_G;13_111555363_C_A;13_111555219_TG_T;13_111554496_A_T;13_111553865_C_G;13_111552432_AG_A;13_111552119_G_A;13_111551920_T_C;13_111549722_C_T;13_111549334_TA_T;13_111548261_C_T;13_111547760_G_T;1…	13_111566098_C_T;13_111565064_A_G;13_111562803_T_C;13_111562398_G_A;13_111562280_A_G;13_111561798_C_T;13_111559791_C_G;13_111557849_A_C;13_111557469_CACTT_C;13_111557399_G_A;13_111555592_G_A;13_111555372_A_G;13_111555363_C_A;13_111555219_TG_T;13_111554496_A_T;13_111553865_C_G;13_111552432_AG_A;13_111552119_G_A;13_111551920_T_C;13_111549722_C_T;13_111549334_TA_T;13_111548261_C_T;13_111547760_G_T;1…		0.4504950495049505	13	-1	111530887	111567416
ENSG00000088451	ENSG00000088451	ENST00000261296_TGDS	O95455	13_95252147_C_T	rs9301983	5.800616199231183e-12	1.657903712553725e-13	3.0	2.4294802252453286e-19	-0.6772953667339958	4.7610901100445134e-23	-0.6578989542762159	0.0551435384549972	-0.5248728827981983	0.0009101723220795377	-0.4509783005694184	False	95252147,95220009,95222544,95223903,95227340,95229288,95230624,95231981,95233607,95234223,95235175,95235890,95236963,95237460,95237526,95237793,95238465,95238466,95238470,95238884,95239005,95239068,95239427,95240054,95240291,95240561,95241307,95241568,95241573,95241634,95242282,95242352,95242386,95243270,95244087,95246440,95246883,95247626,95248905,95249017,95250102,95250528,95250609,95250671,952…		13_95242282_AACT_A;13_95239065_TGCAGGGGT_T;13_95239002_ATTATTTTT_A;13_95239002_ATTAT_A;13_95238464_CG_C;13_95230624_A_AAGTGGCAAACATATT;			13_95247626_T_C;13_95246883_C_T;13_95246440_C_T;13_95244087_T_C;13_95243270_G_A;13_95242386_C_G;13_95242352_G_A;13_95242282_AACT_A;13_95241634_C_T;13_95241568_G_C;13_95241307_G_A;13_95240561_T_C;13_95240291_C_A;13_95240054_G_A;13_95239068_A_G;13_95239065_TGCAGGGGT_T;13_95239005_A_C;13_95239002_ATTATTTTT_A;13_95239002_ATTAT_A;13_95238884_G_A;13_95238470_G_T;13_95238466_A_G;13_95238465_GA_AG;13_952…			0.33663366336633666	13	-1	95226308	95248511
ENSG00000088756	ENSG00000088756	ENST00000314319_ARHGAP28	Q9P2N2	18_6713490_C_G	rs12458536	6.4209353878769905e-15	2.3545295609163274e-17	17.0	2.1966758717335457e-24	0.7231677572228107	1.2928527107484138e-26	0.8160330390689097	0.00025909417713601356	0.505718620976611	0.00483484074489304	0.29373115909914826	False	6713490,6686951,6689374,6689385,6713257,6713314,6713505,6713515,6713579,6714404,6715863,6716098,6716795,6718031,6718467,6719009,6719078,6719503,6719945,6719946,6720203,6720798,6721388,6723061,6723126,6723231,6723282,6723728,6723883,6723980,6724373,6724710,6724894,6725074,6725274,6725397,6725698,6725839,6726177,6726843,6727176,6728467,6728488,6728678,6728751,6728903,6729022,6729046,6729314,6730016…		18_6746934_G_GCACTGTATA;18_6738607_TA_T;18_6736577_TA_T;18_6736577_T_TA;			18_6755698_C_G;18_6749032_G_A;18_6748161_A_T;18_6747728_A_T;18_6747553_A_G;18_6746934_G_GCACTGTATA;18_6746406_T_G;18_6745713_A_G;18_6740785_T_C;18_6740452_T_G;18_6739875_C_T;18_6738607_TA_T;18_6736577_TA_T;18_6736577_T_TA;18_6736125_A_G;18_6734128_C_G;18_6733011_A_C;18_6730719_A_C;18_6730716_A_C;18_6730187_G_A;18_6730016_G_C;			0.4603960396039604	18	1	6729717	6915715
ENSG00000088766	ENSG00000088766	ENST00000378863_CRLS1	Q9UJA2	20_6019481_A_G	rs6139899	2.1532572769843713e-11	2.832947622204461e-13	7.0	2.0716671802205208e-22	0.6198675088446535	0.03750957340626835	0.15202896455533302	0.07797294892175766	0.19277907962918928	0.16815365499024465	0.1479448244823358	False	6019481,5986234,5987634,5989838,5992676,5994488,5998627,5999437,6003893,6005634,6009174,6009512,6009784,6016187,6018711				20_6018711_G_A;20_6019481_A_G;	20_6009512_C_A;20_6009174_G_A;20_6005634_A_G;20_6003893_C_G;20_5999437_A_G;20_5998627_G_A;20_5994488_G_A;20_5989838_G_A;20_5987634_A_C;			0.4653465346534654	20	1	5986736	6020699
ENSG00000088832	ENSG00000088832	ENST00000381719_FKBP1A	P62942	20_1350709_T_C	rs8392	0.002294656172590377	8.471362105055335e-05	8.0	2.0631476451249376e-07	-0.5199002886152286	0.023930458390652568	0.16404079075509706	0.03405965689601996	-0.05236498172216919	0.012227128619417849	0.1422622895979897	True	1350709								0.349009900990099	20	-1	1349622	1373806
ENSG00000088833	ENSG00000088833	ENST00000381653_NSFL1C	Q9UNZ2	20_1415456_T_C	rs6109986	4.016565428556463e-15	1.6219957623355905e-17	15.0	2.245726351694944e-24	-1.0946320217533447	0.000449555091617468	0.4164290118430861	0.000552401447015506	-0.5441791551820963	3.557272729437265e-05	0.4721266948459091	False	1415456,1410818,1412831,1414706,1415305,1416737,1417397,1419215,1419526,1421416,1426685,1426861,1432828,1436445,1437148,1446580				20_1436445_T_A;20_1426685_C_T;	20_1446580_A_T;20_1437148_A_G;20_1436445_T_A;20_1432828_A_G;20_1426861_A_G;20_1426685_C_T;	20_1446580_A_T;20_1437148_A_G;20_1436445_T_A;20_1432828_A_G;20_1426861_A_G;20_1426685_C_T;		0.10643564356435643	20	-1	1422807	1454487
ENSG00000088882	ENSG00000088882	ENST00000380605_CPXM1	Q96SM3	20_2782606_G_C	rs215546	0.010537327924541321	0.003598900453971503	1.0	3.7119904450540006e-07	-0.58876027397112	1.9859553765207288e-07	-0.644105865918016	1.3022491774962806	-0.3371218993710139	0.4107888973067715	-0.1245857875582036	False	2782606,2777459,2778363,2779257,2779747,2784272,2784833,2784976,2785092,2787474,2795625					20_2779747_A_G;20_2779257_G_C;20_2778363_C_T;20_2777459_T_C;			0.13366336633663367	20	-1	2774715	2781283
ENSG00000088930	ENSG00000088930	ENST00000430571_XRN2	Q9H0D6	20_21233553_A_G	rs1000176	2.5365456294013655e-10	8.890738621049251e-12	3.0	8.087247022628326e-13	0.6278915447424839	0.4706293574769164	0.02768208081025549	0.21203769346183204	0.5920768735189037	0.3191131054383077	-0.10125443877920136	True	21233553,21238364,21238651,21241417,21241458,21243293,21245206,21245989,21246620,21258119,21260004,21266590,21267097,21270065,21273696,21302327,21307107,21324510,21325711,21336825					20_21336825_G_A;20_21325711_T_C;20_21324510_G_A;20_21307107_A_G;20_21302327_G_T;			0.31683168316831684	20	1	21283942	21370463
ENSG00000088986	ENSG00000088986	ENST00000548342_DYNLL1	P63167	12_120905727_G_A		0.007169367625466011	0.0002144171558395718	11.0	4.7553273007302417e-08	-0.5090053132622994	0.8700596436576344	0.009227943446825844	0.08505818331621355	-0.0906744993259494	0.4748155041143117	-0.0615339824955381	True	120905727								0.36386138613861385	12	1	120907653	120936296
ENSG00000089006	ENSG00000089006	ENST00000419004_SNX5	Q9Y5X3	20_17914792_C_T	rs1555308	1.9567962795437187e-08	1.3942679231851454e-10	19.0	2.0302928230021493e-16	-0.8515326139234579	0.5738718169108938	-0.05052296135733386	0.6430120880093149	-0.1929853442670133	0.3175280753590073	0.07437820567205389	False	17914792,17914943,17915035,17916350,17916461,17917012,17917144,17919570,17919669,17921041,17921403,17921572,17921873,17924591,17927028,17928535,17930034,17930092,17931513,17932210,17932415,17932978,17934018,17934961,17935822,17936657,17936776,17937936,17938732,17939033,17939197,17939791,17940977,17942241,17942616,17942651,17942792,17943138,17943492,17944094,17944485,17944895,17944973,17945123,179…	20_17948894_G_A;	20_17947027_C_CA;20_17947027_CAAA_C;20_17944973_T_TTA;20_17942241_AATT_A;20_17928535_TG_T;20_17928534_TTG_T;		20_17949452_C_T;	20_17948894_G_A;20_17948082_T_C;20_17947430_A_G;20_17947317_A_G;20_17947144_G_A;20_17947027_C_CA;20_17947027_CAAA_C;20_17946643_C_T;20_17946086_A_G;20_17945654_C_T;20_17945243_T_C;20_17945123_C_A;20_17944973_T_TTA;20_17944895_T_A;20_17944485_T_G;20_17944094_C_T;20_17943492_A_T;20_17943138_G_A;20_17942792_G_T;20_17942651_C_T;20_17942616_T_C;20_17942241_AATT_A;20_17940977_G_A;20_17939791_A_G;20_179…		20_17948894_G_A;20_17932210_C_T;	0.2698019801980198	20	-1	17922241	17949623
ENSG00000089009	ENSG00000089009	ENST00000546368_RPL6	Q02878	12_112601250_G_A	rs2272308	1.2152676834104475e-21	2.7488276138882434e-24	13.0	4.699302891015066e-32	1.5591310411247852	0.10675675443719672	-0.15326452974177046	2.5474217154025958	0.17760638093242653	0.7627674333013541	0.04547380973410675	True	112601250,112240192,112244053,112250158,112258579,112267851,112287753,112290443,112313208,112322778,112327057,112329028,112331317,112340341,112357260,112364512,112365491,112366118,112366324,112368363,112369878,112378909,112380027,112391876,112393934,112397887,112403135,112403161,112406749,112427796,112428171,112432709,112433411,112433556,112434152,112434504,112436195,112437514,112438046,112438770…		12_112853054_C_CAG;			12_112853054_C_CAG;12_112853054_C_G;12_112845843_A_T;12_112843363_G_A;			0.10396039603960396	12	-1	112842994	112856642
ENSG00000089022	ENSG00000089022	ENST00000547915_MAPKAPK5	Q8IW41-2	12_112240192_G_A	rs75480510	1.567555424006248e-05	3.1472795916004065e-07	10.0	2.358060545240266e-09	-0.5466009933668988	0.3562193772581161	0.11023909545058948	1.5302497227287024	0.025094917125155214	0.1640802059662022	0.16409609935881253	False	112240192,112244053,112250158,112258579,112267851,112287753,112290443,112313208,112322778,112327057,112329028,112331317,112340341,112357260,112364512,112365491,112366118,112366324,112368363,112369878,112378909,112380027,112391876,112393934,112397887,112403135,112403161,112406749,112427796,112428171,112432709,112433411,112433556,112434152,112434504,112436195,112437514,112438046,112438770,112439664…		12_112287753_CTT_C;			12_112329028_A_G;12_112327057_T_G;12_112322778_G_A;12_112313208_A_T;12_112290443_G_A;12_112287753_CTT_C;	12_112322778_G_A;12_112313208_A_T;12_112290443_G_A;12_112287753_CTT_C;		0.10148514851485148	12	1	112279782	112334343
ENSG00000089050	ENSG00000089050	ENST00000337227_RBBP9	O75884	20_18259316_G_T	rs76512765	0.01832498257501296	0.002210694400663173	3.0	1.684502194748171e-06	0.5214662261389873	5.7920882478497725e-06	0.5561658385179511	1.218058430107875	0.16595623710356655	0.16638333305322844	0.18625741216234729	False	18259316,18271254								0.054455445544554455	20	-1	18467184	18477887
ENSG00000089053	ENSG00000089053	ENST00000541887_ANAPC5	F5H0F9	12_121740564_G_A	rs144813769	0.010731965101930302	0.0001530523134096741	24.0	4.7261876553115304e-08	0.9249403937733202	0.12533040447198954	-0.29381486562376524	0.8626374563555799	0.5536364735679566	0.8342212347089362	0.3070584873441975	False	121740564,121745975,121786802,121790178,121792142,121797905,121800927,121802251,121808645,121809119,121809369,121810504,121811853,121812133,121812377,121812438				12_121790178_G_A;	12_121812438_G_C;12_121812377_G_A;12_121812133_G_A;12_121811853_T_C;12_121810504_A_G;12_121809369_T_C;12_121809119_T_C;12_121808645_A_C;12_121802251_G_C;12_121800927_A_C;12_121797905_G_A;12_121792142_C_T;12_121790178_G_A;12_121786802_T_G;			0.06930693069306931	12	-1	121746048	121837699
ENSG00000089063	ENSG00000089063	ENST00000202834_TMEM230	Q96A57-2	20_5069335_A_T	rs4518035	5.157574297529186e-13	4.468846231294401e-15	9.0	6.995041701001756e-24	0.7964226375747085	8.586855604524606e-27	0.7843764946330828	1.1693966336532113e-09	0.4518095456473623	2.592256899966028e-13	0.483487471421289	False	5069335,5055138,5055467,5056197,5056899,5058061,5058088,5058791,5059269,5059552,5061017,5061018,5061460,5061789,5062723,5062806,5063568,5063643,5064906,5065093,5065163,5066435,5066731,5067164,5067209,5067352,5067930,5068919,5069133,5069440,5069714,5069748,5069764,5070020,5070100,5070266,5071029,5071382,5071542,5071680,5071942,5071950,5072373,5072721,5073139,5074892,5075214,5075381,5075777,5076575…				20_5081049_T_A;				0.448019801980198	20	-1	5080486	5093749
ENSG00000089157	ENSG00000089157	ENST00000546989_RPLP0	F8VPE8	12_120567897_A_G	rs2240314	2.1680213430271608e-26	1.256117683083773e-29	27.0	1.8616757120093315e-33	-1.6580739224040828	4.631606246830656e-06	0.3688016589555557	1.9653555244603305	-0.3141929490737406	0.04623996161129007	-0.4653565446877059	False	120567897,120571033,120571084,120573815,120576265,120578070,120579669,120581773,120584391,120586193,120587226,120589064,120589325,120589775,120591143,120591952,120594134,120596609,120596719,120598777,120600002,120600172,120602078,120603085,120603263,120607552,120608031,120610280,120612699,120613345,120613428,120614093,120615992,120617900,120618022,120618108,120618503,120619669,120622885,120625393…	12_120636549_C_A;	12_120635738_TA_T;12_120635737_TTA_T;	12_120636549_C_A;		12_120636549_C_A;12_120636048_C_T;12_120635847_G_T;12_120635738_TA_T;12_120635737_TTA_T;	12_120636549_C_A;12_120636048_C_T;12_120635847_G_T;12_120635738_TA_T;12_120635737_TTA_T;		0.1113861386138614	12	-1	120634489	120639038
ENSG00000089177	ENSG00000089177	ENST00000354981_KIF16B	Q96L93	20_16559255_G_A	rs6044142	0.001043512126184687	5.7293749765115494e-05	5.0	7.996207629992448e-07	0.3483720849217651	9.087897034348864e-10	0.4253886453000705	0.2890206553515132	0.3285948848253002	0.996994957126438	0.06785230624386747	False	16559255,16545951,16552336,16553532,16555547,16556644,16557283,16557295,16557993		20_16553532_GC_G;			20_16553532_G_C;20_16553532_GC_G;20_16552336_A_G;20_16545951_T_C;			0.4356435643564357	20	-1	16252749	16554078
ENSG00000089220	ENSG00000089220	ENST00000542939_PEBP1	P30086	12_118580315_T_C	rs2936839	0.02536886892463426	0.004794801255931128	2.0	2.40041694794194e-06	0.4193022250728243	0.3805453988196853	0.0422646412257502	0.0024034136598384873	0.2285292644884507	0.002458557316974463	0.15511014551558144	False	118580315,118580502,118581833,118581860,118583232				12_118583232_T_C;	12_118581860_A_G;12_118581833_T_C;12_118580502_A_G;12_118580315_T_C;			0.4331683168316832	12	1	118573663	118583389
ENSG00000089335	ENSG00000089335	ENST00000446502_ZNF302	E7EVR1	19_35134800_A_G	rs2902474	5.492673078501127e-07	6.8132880866267175e-09	13.0	2.626284766773883e-13	-1.2161595841952206	0.7834402325281495	0.04046871276406145	0.9401408890313866	0.013734715273660214	0.7792540777709245	-0.048684754309926685	False	35134800								0.08415841584158416	19	1	35168544	35177302
ENSG00000089351	ENSG00000089351	ENST00000598118_GRAMD1A	Q96CP6-3	19_35506729_G_A	rs2290647	1.7942824779719707e-06	2.094947549361141e-08	15.0	3.772340028503378e-15	-0.588967966633614	3.0052398317747973e-06	-0.18660661844358745	0.5038308575806933	-0.3367060169095489	0.5567905861924989	-0.04749429755464929	False	35506729,35494834,35498890,35501795,35503025,35503642,35505591,35506622,35507016,35507073,35507234,35507374,35507524,35507531,35507568,35507586,35507734,35507763,35508399,35510504,35525253,35525322,35532314			19_35506729_G_A;	19_35506729_G_A;	19_35510504_A_G;19_35508399_C_T;19_35507763_C_T;19_35507734_G_A;19_35507586_C_T;19_35507568_G_T;19_35507531_A_G;19_35507524_G_T;19_35507374_A_G;19_35507234_T_C;19_35507073_A_G;19_35507016_C_T;19_35506622_G_T;19_35505591_G_A;19_35503642_C_T;19_35503025_C_T;19_35501795_G_A;19_35498890_C_T;19_35494834_G_C;	19_35510504_A_G;19_35508399_C_T;19_35507763_C_T;19_35507734_G_A;19_35507586_C_T;19_35507568_G_T;19_35507531_A_G;19_35507524_G_T;19_35507374_A_G;19_35507234_T_C;19_35507073_A_G;19_35507016_C_T;19_35506622_G_T;19_35505591_G_A;19_35503642_C_T;19_35503025_C_T;19_35501795_G_A;19_35498890_C_T;19_35494834_G_C;19_35506729_G_A;	19_35506729_G_A;	0.2673267326732673	19	1	35485688	35517375
ENSG00000089597	ENSG00000089597	ENST00000534419_GANAB	Q14697	11_62418921_T_A	rs11231173	0.0064147277311998215	0.0001301925294687456	16.0	3.247949192667597e-07	-0.4252080314093261	0.473410395597387	-0.04710652523909842	0.2498953323808805	-0.1854231510189437	0.499543267386729	-0.10584676892124126	True	62418921,62380119,62381808,62386647,62391973,62392100,62392229,62394881,62395061,62400016,62403058,62403623,62404417,62406162,62412965		11_62403058_GA_G;			11_62412965_G_A;11_62406162_G_T;11_62404417_A_T;11_62403623_C_T;11_62403058_GA_G;11_62400016_T_C;11_62395061_G_A;11_62394881_A_G;	11_62412965_G_A;11_62406162_G_T;11_62404417_A_T;11_62403623_C_T;11_62403058_GA_G;11_62400016_T_C;11_62395061_G_A;11_62394881_A_G;		0.4034653465346535	11	-1	62392298	62414104
ENSG00000089685	ENSG00000089685	ENST00000350051_BIRC5	A0A0B4J1S3	17_76233906_C_T	rs1109627	2.358445056088737e-10	2.2399479228105765e-12	11.0	2.7703732833515773e-14	0.5535342759272927	2.529343214610825e-14	0.5064021177002925	0.4284850865089417	0.10943795753937068	0.8953618434367848	0.011254982146106651	False	76233906,76233688								0.30445544554455445	17	1	76210267	76221717
ENSG00000089693	ENSG00000089693	ENST00000537126_MLF2	Q15773	12_6859308_T_C	rs2302370	9.149923906642458e-15	5.34190720154272e-17	11.0	1.0468456401403447e-19	-0.7276933963495328	0.07229704864667702	-0.09012401760632822	0.09971329716606006	-0.08314146991846963	0.2734133499086122	0.09279342777640598	False	6859308,6854370,6854843,6859797,6862259,6866113,6866827			12_6859308_T_C;	12_6862259_G_C;	12_6866827_T_G;12_6866113_A_G;12_6862259_G_C;12_6859797_T_C;12_6859308_T_C;			0.36386138613861385	12	-1	6857170	6876641
ENSG00000089847	ENSG00000089847	ENST00000262970_ANKRD24	Q8TF21	19_4195988_A_G	rs62130862	0.009893663741198834	0.0005579877398147307	6.0	7.553155365399091e-08	0.3608570068502022	4.96562760784178e-06	0.2503189136046579	0.16014807608886586	0.356951736666705	0.22208537102433426	0.12085541126893296	False	4195988					19_4195988_A_G;			0.4282178217821782	19	1	4183351	4224811
ENSG00000089902	ENSG00000089902	ENST00000570597_RCOR1	Q9UKL0	14_103026991_G_A	rs7140280	0.06339114741491672	0.005340007031117779	5.0	4.709095279735651e-06	-0.3823286287458784	0.7970384534546258	-0.017120128845180792	0.17907718219297838	-0.3771698919463111	0.0573074467010296	-0.13722325855081824	True	103026991,103022060,103022313,103022961,103023569,103023574,103024080,103024387,103024706,103025040,103026423,103027359,103027789,103028703,103029024,103029179,103031607,103031831,103031845,103033630,103034195,103034507,103035432,103038708,103039430,103039532,103039809,103039936,103040087,103040300,103041148,103046060,103048904,103050106,103050143,103050183,103050397,103050764,103051117,103051132…								0.2079207920792079	14	1	103058998	103196913
ENSG00000089916	ENSG00000089916	ENST00000557263_GPATCH2L	Q9NWQ4-4	14_76679059_T_G	rs17104265	1.3347399325542975e-09	1.1822651629215365e-11	13.0	8.112852503677197e-15	-0.7445456424048527	3.9113438735806863e-07	0.29189731442224465	0.07787556471909006	0.2278458816780209	0.008405651045628806	0.3424594454929483	False	76679059,76619746,76621671,76621677,76623706,76682320,76686702				14_76679059_T_G;	14_76623706_G_A;14_76621677_A_G;14_76621671_C_T;14_76619746_T_C;	14_76623706_G_A;14_76621677_A_G;14_76621671_C_T;14_76619746_T_C;		0.25742574257425743	14	1	76618259	76720685
ENSG00000090054	ENSG00000090054	ENST00000262554_SPTLC1	O15269	9_94826465_C_T	rs7860518	3.345349086387177e-10	5.0927282190186885e-12	7.0	2.8978849445089013e-15	0.7506101042506663	2.1373299255309795e-15	0.8268690414520236	0.047760043610904426	0.33359417379587697	0.0005771827355793406	0.37748078805299023	True	94826465,94698842,94722509,94792132,94824750,94829156,94830974,94839105,94839342,94840206,94850416,94852903,94860625,94861762,94864322,94864754,94870152,94877836		9_94861762_CTT_C;9_94852903_AC_A;9_94852902_AAC_A;			9_94870152_C_A;9_94864754_A_C;9_94864322_A_G;9_94861762_CTT_C;9_94860625_T_G;9_94852903_AC_A;9_94852902_AAC_A;9_94850416_T_C;9_94840206_T_C;9_94839342_A_G;9_94839105_T_C;9_94830974_T_C;9_94829156_A_G;9_94824750_C_T;9_94826465_C_T;			0.2103960396039604	9	-1	94794281	94877666
ENSG00000090097	ENSG00000090097	ENST00000497653_PCBP4	C9J0A4	3_52044458_A_C	rs148341748	0.08681885131789184	0.002013293572019109	19.0	2.718583238757721e-05	-0.5305290379805062	0.559026640914345	-0.05726330559286566	0.743237923631496	-0.27542409582307004	0.3829068595644304	-0.14157399678938415	False	52044458								0.1113861386138614	3	-1	51991470	52002426
ENSG00000090263	ENSG00000090263	ENST00000324787_MRPS33	Q9Y291	7_140746740_G_A	rs533441	0.0002414345602655768	6.556640479780817e-06	9.0	3.0073857499704376e-10	0.901737417108748	9.907885484208451e-11	0.6225424852397904	0.2716672399110229	0.3384330761174299	0.5215683488681111	0.08572615816778373	True	140746740,140706031,140745552,140750902,140755264,140755721,140756162,140756549,140756903,140757886,140758147,140758610,140759767,140761247,140767950,140768158,140768480,140769459,140772997,140779740,140780988				7_140706031_G_A;				0.09405940594059406	7	-1	140705854	140715028
ENSG00000090372	ENSG00000090372	ENST00000263280_STRN4	Q9NRL3	19_47249707_T_C	rs1693994	0.0004805387895279535	5.166931821063328e-06	24.0	1.2476101087169722e-08	0.35704961102290844	3.820399044346554e-14	0.4949478343978148	0.01444192341935521	0.5474606566280213	0.2744761983455861	0.11412057145496712	False	47249707,47170644,47171044,47173627,47182975,47183416,47185505,47185919,47191699,47192422,47193850,47194309,47196424,47201550,47209041,47210859,47217914,47220927,47221129,47223543,47224317,47224484,47232223,47241217,47254540,47257804,47273579,47274214,47276210,47277816,47279197,47280789,47283203,47283403				19_47223543_T_C;19_47249707_T_C;	19_47241217_G_A;19_47232223_C_T;19_47224484_A_G;19_47224317_C_T;19_47249707_T_C;	19_47241217_G_A;19_47232223_C_T;19_47249707_T_C;		0.2599009900990099	19	-1	47222764	47250251
ENSG00000090432	ENSG00000090432	ENST00000264198_MUL1	Q969V5	1_20834610_C_A	rs6700034	1.2538763417770514e-15	7.211779947412119e-17	1.0	1.3573144890331295e-18	0.6793280655309011	1.8874843477588367e-18	0.6694906536674875	0.05058885964912728	0.38074939984262746	0.1311806823064019	0.19389423749287127	False	20834610				1_20834610_C_A;				0.15346534653465346	1	-1	20825943	20834654
[truncated: 3,320 more rows]
