# Supplementary material for: Population-scale proteome variation in human induced pluripotent stem cells
Source: eLife. 2020 Aug 10;9:e57390. doi: 10.7554/eLife.57390 (PMC7447446; doi:10.7554/eLife.57390)
Supplement: Figure 3—source data 2. — Consists of variants mapped at the protein level, peptide resolution, for genes detected at both RNA and protein levels. The table columns are analogous to Figure 2—source data 1 pQTL_results. [file elife-57390-fig3-data2.xls]

ensembl_gene_id	ensembl_gene_id	feature_id	protein_id	snp_id	snp_rsid	q-value	empirical_feature_p_value	number_features	peptide_nominal_p_value_bonf	peptide_eff_size	protein_nominal_p_value_bonf	protein_eff_size	transcript_nominal_p_value_bonf	transcript_eff_size	mrna_nominal_p_value_bonf	mrna_eff_size	in_corum	ld_snps	inframe_LD	frameshift_LD	splicing_LD	UTR_LD	intron_LD	NMD_transcript_LD	synonymous_LD	maf_hipsci	chromosome_gene	strand	gene_start	gene_end
ENSG00000001036	ENSG00000001036	FDPTWESLDAR	Q9BTY2	6_143825104_G_T		0.024636258031264784	9.227630543722381e-05	12.0	1.871308890665163e-08	1.3404783543060372	1.943672562350138e-09	0.6453767904835139	0.06938581859740194	0.1915929488981208	0.05151426935230605	0.194785920414944	False	143825104	6_143825104_G_T;							0.27722772277227725	6	-1	143815948	143832827
ENSG00000003056	ENSG00000003056	HTLADNFNPVSEER	P20645	12_9082581_A_G		0.07401634604737184	0.0004130493274261289	11.0	1.0479659974285859e-07	-0.840933524231855	1.3901036842995895e-06	-0.7450598135261575	1.3018545887872784e-24	-0.5517059209354014	0.00026859669645502767	-0.3799718650096182	False	9082581,9098995	12_9098995_G_GAAC;	12_9098995_G_GAAC;			12_9098995_G_GAAC;	12_9098995_G_GAAC;		0.08663366336633663	12	-1	9092959	9102551
ENSG00000003509	ENSG00000003509	EVFVDIDPQVSDK	Q7L592	2_37480249_A_G	rs1056021	4.023000650297732e-05	3.7497974987502715e-08	19.0	6.990274099726828e-10	-0.4542366881025692	1.3020043305223705e-06	-0.43291990802284586	1.7264941110695223e-21	-0.6629895287093788	5.339910300528321e-06	-0.3694938522957529	False	37480249				2_37480249_A_G;		2_37480249_A_G;		0.3094059405940594	2	1	37458774	37480546
ENSG00000004455	ENSG00000004455	LVSDEMVVELIEK	F8W1A4	1_33448347_T_G	rs4376697	1.2139395669585254e-06	8.618772403119841e-10	15.0	1.8842314238096333e-06	0.73016036058605	0.9124817009429146	-0.01548612320619269	0.10808127362039267	0.4220429733456718	0.20427165086759846	0.14270716955200138	False	33448347								0.0891089108910891	1	-1	33473585	33546597
ENSG00000005436	ENSG00000005436	VQLIDWNPLK	P16383	2_75881264_G_T	rs7592795	0.028278795021631917	0.00011812696257146057	11.0	3.811958807899412e-08	0.5520957993284918	1.098701346825063e-07	0.5003200497968942	9.978102767456842e-16	0.4937935777460911	1.2078811677596778e-13	0.6426946720742873	False	75881264,75857892,75859919,75860271,75861744,75862484,75862704,75863450,75878618,75880366,75880374,75881828,75882576,75883390,75883878,75884988,75886066,75886643,75887579,75887834,75888096,75888160,75890408,75890540,75892319,75895978,75903170,75903864,75905719,75911977,75911985,75913517,75914063,75915035,75917612,75918070,75919500,75921232,75928300,75929130,75929238,75930048,75931589,75931600,759…		2_75934688_TA_T;2_75921232_G_GCTTA;2_75919500_AG_A;2_75891914_AAAACAAAACAAATTTCTCCCTTTAAAAATGCAATGTATGAGGGAACAGCGGTCAATTCAGAACCTGATCATCAGTTGTTAATCTAAAACAAAAGCTTTACCTTAAGCCAATATCTAAAGTAGCATAAAACACAGAGAGATGCTGCCATCTCCACTTAATTATAAAGTTCAAATACAGATCATTAGTGGATGTATTCTGGCAAATTTCAATGTGAATTACTGTAAAAGGTAGAAAAGCATATAGTAAGTCTATCAGAAATTTCAGTAGTGCTGCGTTGCTATTAGCTTGTATGAGACATTGTGGTGGAAGCAATGGTGGGAGTATATTCACACATCA…	2_75891914_AAAACAAAACAAATTTCTCCCTTTAAAAATGCAATGTATGAGGGAACAGCGGTCAATTCAGAACCTGATCATCAGTTGTTAATCTAAAACAAAAGCTTTACCTTAAGCCAATATCTAAAGTAGCATAAAACACAGAGAGATGCTGCCATCTCCACTTAATTATAAAGTTCAAATACAGATCATTAGTGGATGTATTCTGGCAAATTTCAATGTGAATTACTGTAAAAGGTAGAAAAGCATATAGTAAGTCTATCAGAAATTTCAGTAGTGCTGCGTTGCTATTAGCTTGTATGAGACATTGTGGTGGAAGCAATGGTGGGAGTATATTCACACATCATGACATTAGCAAATAATACAAATCTGATTTTTTTTTTTTTTAAAGGGACTT…	2_75929238_C_A;2_75929130_C_A;2_75915035_C_T;2_75891914_AAAACAAAACAAATTTCTCCCTTTAAAAATGCAATGTATGAGGGAACAGCGGTCAATTCAGAACCTGATCATCAGTTGTTAATCTAAAACAAAAGCTTTACCTTAAGCCAATATCTAAAGTAGCATAAAACACAGAGAGATGCTGCCATCTCCACTTAATTATAAAGTTCAAATACAGATCATTAGTGGATGTATTCTGGCAAATTTCAATGTGAATTACTGTAAAAGGTAGAAAAGCATATAGTAAGTCTATCAGAAATTTCAGTAGTGCTGCGTTGCTATTAGCTTGTATGAGACATTGTGGTGGAAGCAATGGTGGGAGTATATTCACACATCATGACAT…	2_75936976_C_G;2_75936935_T_A;2_75935894_T_C;2_75935614_A_T;2_75935038_C_G;2_75934688_T_A;2_75934688_TA_T;2_75933830_T_A;2_75932846_C_T;2_75931600_T_G;2_75931589_T_A;2_75930048_C_G;2_75929238_C_A;2_75929130_C_A;2_75928300_G_T;2_75921232_G_GCTTA;2_75919500_AG_A;2_75919500_A_C;2_75918070_T_G;2_75917612_G_A;2_75913517_C_G;2_75911985_T_C;2_75911977_G_A;2_75905719_C_T;2_75903864_T_C;2_75903170_A_G;2_7…		2_75915035_C_T;	0.36386138613861385	2	-1	75879126	75938115
ENSG00000005882	ENSG00000005882	HIGSIDPNCNVSEVVK	Q15119	17_48173720_A_G	rs3785920	0.06472069313480436	0.0006079423729905639	6.0	1.7753531205431908e-06	-0.452314251155182	0.04281585331592274	-0.1854750803374522	2.80192072630085e-05	-0.3046393920511927	2.6646712798758835e-05	-0.2325881988375665	False	48173720,48171778,48174908		17_48172916_CGGTACGGAGTGGGCGGGAGGCGGCTGGCAGCGGAGGCCGGCGGGGCGCTGGGAGGGGCAGCCGGGGGCTAGGGGGACGGAGGAGAAGAAAGGCCCCGAGTGACAGAGAAGGGTTGTTTGGAAAGGTACAGGCAGGAAAGAGTTAATGGGGAAGCAGGAACCGGCCGGGGCCTCTCGACGGGGCTGCTGATGGGAATGGGGGGCATTTACAAGGACGGTCCCGAGGTTTCTTCGTGGGCCTCATGAAGGGTCTTGAAGAGTAAGGGGCAGTGAAGCTGTGATGTTACTGCAGGAAGGGAGTAGGGTGGTATCCAGACGCGAAAGGGTTAATGGGAGTTGTCCTCATGACTGGAGGAGTAGGGGCCCCTCCTCCCACCAGAGGAAACC…	17_48172916_CGGTACGGAGTGGGCGGGAGGCGGCTGGCAGCGGAGGCCGGCGGGGCGCTGGGAGGGGCAGCCGGGGGCTAGGGGGACGGAGGAGAAGAAAGGCCCCGAGTGACAGAGAAGGGTTGTTTGGAAAGGTACAGGCAGGAAAGAGTTAATGGGGAAGCAGGAACCGGCCGGGGCCTCTCGACGGGGCTGCTGATGGGAATGGGGGGCATTTACAAGGACGGTCCCGAGGTTTCTTCGTGGGCCTCATGAAGGGTCTTGAAGAGTAAGGGGCAGTGAAGCTGTGATGTTACTGCAGGAAGGGAGTAGGGTGGTATCCAGACGCGAAAGGGTTAATGGGAGTTGTCCTCATGACTGGAGGAGTAGGGGCCCCTCCTCCCACCAGAGGAAACC…	17_48172916_CGGTACGGAGTGGGCGGGAGGCGGCTGGCAGCGGAGGCCGGCGGGGCGCTGGGAGGGGCAGCCGGGGGCTAGGGGGACGGAGGAGAAGAAAGGCCCCGAGTGACAGAGAAGGGTTGTTTGGAAAGGTACAGGCAGGAAAGAGTTAATGGGGAAGCAGGAACCGGCCGGGGCCTCTCGACGGGGCTGCTGATGGGAATGGGGGGCATTTACAAGGACGGTCCCGAGGTTTCTTCGTGGGCCTCATGAAGGGTCTTGAAGAGTAAGGGGCAGTGAAGCTGTGATGTTACTGCAGGAAGGGAGTAGGGTGGTATCCAGACGCGAAAGGGTTAATGGGAGTTGTCCTCATGACTGGAGGAGTAGGGGCCCCTCCTCCCACCAGAGGAAACC…	17_48173720_A_G;17_48172916_CGGTACGGAGTGGGCGGGAGGCGGCTGGCAGCGGAGGCCGGCGGGGCGCTGGGAGGGGCAGCCGGGGGCTAGGGGGACGGAGGAGAAGAAAGGCCCCGAGTGACAGAGAAGGGTTGTTTGGAAAGGTACAGGCAGGAAAGAGTTAATGGGGAAGCAGGAACCGGCCGGGGCCTCTCGACGGGGCTGCTGATGGGAATGGGGGGCATTTACAAGGACGGTCCCGAGGTTTCTTCGTGGGCCTCATGAAGGGTCTTGAAGAGTAAGGGGCAGTGAAGCTGTGATGTTACTGCAGGAAGGGAGTAGGGTGGTATCCAGACGCGAAAGGGTTAATGGGAGTTGTCCTCATGACTGGAGGAGTAGGGGCCCCTCCT…		17_48174908_C_T;	0.30445544554455445	17	1	48172101	48189516
ENSG00000006047	ENSG00000006047	GAEATNVTGPGGVPVK	Q9Y2T7	17_7197794_C_A	rs222859	0.0006356242536349612	2.541165017290913e-06	6.0	1.1251827216345831e-10	0.8803459139057307	3.1604166106882233e-13	0.7922071983066256	2.361875017313592e-08	0.4518387183610786	2.6853753995503672e-06	0.37224863001122577	False	7197794	17_7197794_C_A;							0.20544554455445546	17	-1	7191571	7197934
ENSG00000006282	ENSG00000006282	VLILADGDPSSFLSR	A0A0U1RRL8	17_48615329_G_A	rs2306001	6.581426562790292e-08	6.975306362382231e-11	7.0	7.0639350709468716e-15	-1.678412591564972	2.7880523510555338e-14	-1.0516560253586744	1.4643664825178848e-42	-1.5562416261683871	1.5239792125774945e-32	-1.4881885087307305	False	48615329,48611993,48612315,48612433,48619272,48619290,48624045,48625223,48625307		17_48625307_GGGGGAGGGGCCT_G;			17_48625307_GGGGGAGGGGCCT_G;17_48625223_C_T;			0.12376237623762375	17	1	48620419	48633213
ENSG00000006453	ENSG00000006453	AYYDGVAK	Q9UHR4	7_98027580_C_T	rs1541409	0.0688397022610341	0.00025115036464520054	16.0	8.527364308054327e-09	-0.6429737247265759	0.002423630888672283	-0.3147122739293271	1.7915599072879486e-13	-0.5955701178981131	4.7190447348205766e-17	-0.7351397358090807	False	98027580,97914305,97917910,97924226,97929183,97938443,97938618,97947055,97956758,97960146,97960800,97965821,97967685,97974555,97984077,97988428,97996593,97997164,97998124,98005766,98009224,98013839,98014041,98015435,98015868,98017099,98017192,98017730,98026554,98030349,98030513		7_98026554_ACT_A;7_98017192_AAAC_A;7_97967685_G_GTTGCGCCA;7_97960146_CCT_C;		7_98030349_G_C;	7_98026554_ACT_A;7_98017730_G_A;7_98017192_AAAC_A;7_98017099_G_A;7_98015868_G_A;7_98015435_C_T;7_98014041_G_A;7_98013839_G_A;7_98009224_G_A;7_98005766_C_T;7_97998124_T_A;7_97997164_G_C;7_97996593_T_C;7_97988428_G_A;7_97984077_C_T;7_97974555_C_T;7_97967685_G_GTTGCGCCA;7_97965821_G_C;7_97960800_G_A;7_97960146_CCT_C;7_97956758_G_A;7_97947055_G_C;7_97938618_C_T;7_97938443_G_A;7_97929183_T_C;7_9792422…			0.19801980198019808	7	-1	97920963	98030380
ENSG00000006715	ENSG00000006715	ILQDYNLQILLR	P49754	7_39048581_G_A	rs146756620	0.005392521661482529	7.771295608631456e-06	23.0	5.5549522589629956e-05	-0.6939656665051499	0.9905489624982154	0.0013395230030918415	0.06408351557758413	-0.03604230832253783	0.1963797827310776	0.08387562531991803	True	39048581								0.2698019801980198	7	-1	38762563	38971994
ENSG00000006744	ENSG00000006744	FGPDTQHLVLNENCASVHNLR	Q9BQ52	17_12682916_C_G	rs74875511	0.035864894912716265	5.120496379998618e-05	34.0	2.8105577103327883e-08	-0.6788636701001359	0.6572387231761397	-0.04649163393351241	0.8264111540340167	-0.17740286719186746	0.06715212827246933	-0.12991132667215874	False	12682916,12677444,12683280,12698391,12698393,12706062								0.13861386138613865	17	-1	12895708	12921504
ENSG00000008516	ENSG00000008516	ILLFSGPQFWVFQDR	Q9NPA2	16_2957492_C_T	rs7201839	0.08734197994147913	0.001137107504802313	5.0	8.415439207914119e-05	1.2833886986671192	0.9051680132991164	0.016635395833421385	0.04364930670874705	0.1699379491310023	0.024563708548437826	-0.18440706488117448	False	2957492								0.12871287128712872	16	1	3096682	3110727
ENSG00000009307	ENSG00000009307	CSACNVWR	O75534-2	1_115087292_A_T	rs61811013	0.08859420783141753	0.00013572551198516998	43.0	7.174380760811554e-06	-1.063794261887772	0.6195305487971566	-0.09132226151769007	0.9387979450069878	-0.27518447786102224	0.4388672241538033	-0.07702284985252704	True	115087292,115087605								0.0594059405940594	1	-1	115259534	115301297
ENSG00000011376	ENSG00000011376	ADLEGSLDSK	Q15031	3_45534973_C_G	rs13070575	0.009129011576553384	1.0162435243914152e-05	33.0	8.74047796635735e-09	-0.51636462947154	1.1266775241874627e-09	-0.6593944782870698	6.525214485244427e-21	-0.6553999202371735	1.0214512529060984e-25	-0.7141063330136159	False	45534973,45493876,45493941,45495358,45495927,45496144,45498342,45501088,45503903,45507305,45511026,45511266,45514884,45526812,45528423,45529692,45529896,45530401,45535941,45537973,45542083,45545451,45546577,45549298,45549807,45550661,45551898,45555044,45555700,45555765,45557003,45557707,45559621,45560113,45561149,45561203,45561487,45564003,45564439,45564879,45567557,45569582,45570065,45573466,455…		3_45577250_ACACACACACCCCCACACC_A;3_45495927_AAACT_A;3_45493876_AT_A;			3_45587983_A_G;3_45587111_G_A;3_45581959_C_G;3_45579699_T_C;3_45579533_T_A;3_45577250_ACACACACACCCCCACACC_A;3_45573541_A_G;3_45573466_T_G;3_45570065_A_G;3_45569582_A_G;3_45567557_G_A;3_45564879_G_T;3_45564439_A_T;3_45564003_G_A;3_45561487_C_T;3_45561203_A_G;3_45560113_A_G;3_45559621_C_T;3_45557003_C_T;3_45555765_C_T;3_45555700_A_G;3_45555044_C_A;3_45551898_C_T;3_45550661_C_T;3_45549807_G_A;3_4554…		3_45557707_G_A;	0.2797029702970297	3	1	45429998	45590913
ENSG00000011523	ENSG00000011523	EYEDLLDYTYPLRPGPQLPK	Q76N32	2_65290842_C_A	rs2241161	0.04050107234334496	0.0004060274315290206	5.0	2.1254925251952233e-07	0.5420943760343996	0.0014158196129521006	0.3429615522419533	7.732698561639668e-21	0.5301991999219736	3.571959834334406e-27	0.7311048522570454	False	65290842,65277951,65280185,65291546,65360169					2_65291546_A_G;2_65290842_C_A;			0.4084158415841584	2	1	65283500	65314138
ENSG00000021355	ENSG00000021355	TYNFLPEFLVSTQK	P30740	6_2842139_C_T		0.0048032961716810785	9.162401808456263e-06	17.0	2.5244181127709896e-09	-0.6166431126998431	3.163860404333518e-13	-0.6350079599460687	2.148385269967034e-18	-0.9327946720045412	3.4651580890276836e-18	-0.7234549278830871	False	2842139				6_2842139_C_T;				0.2871287128712871	6	-1	2832566	2842240
ENSG00000021826	ENSG00000021826	GQILTMANPIIGNGGAPDTTALDELGLSK	P31327-3	2_211481257_C_G	rs2287599	0.021232925002812257	2.9217561961833423e-05	31.0	1.1774728077653017e-08	-0.8683781851507741	0.00027317668072876413	-0.34615480070018645	1.0364535895233001e-05	-0.3160716339789328	1.6631616674058445e-07	-0.38026075792819786	False	211481257,211429960,211430103,211430333,211433790,211435485,211437045,211437614,211438396,211439599,211446121,211448659,211448693,211449909,211450396,211451796,211453801,211455342,211456637,211456639,211457261,211460702,211460864,211461880,211465780,211469123,211469190,211471071,211485476,211495110,211499367,211499394	2_211456637_A_G;	2_211456635_ACA_A;2_211451796_AT_A;2_211439599_GT_G;			2_211499394_T_A;2_211499367_A_G;2_211495110_T_C;2_211485476_T_A;2_211471071_G_A;2_211469190_T_G;2_211469123_A_G;2_211465780_T_C;2_211461880_T_A;2_211460864_A_G;2_211460702_G_A;2_211457261_C_T;2_211455342_T_C;2_211453801_A_G;2_211451796_AT_A;2_211450396_T_C;2_211449909_T_C;2_211448693_A_T;2_211448659_C_A;2_211446121_C_T;2_211439599_G_A;2_211439599_GT_G;2_211438396_G_A;2_211437614_T_C;2_211437045_T…		2_211456639_C_T;2_211481257_C_G;	0.3985148514851485	2	1	211342406	211543831
ENSG00000022277	ENSG00000022277	DAVIEFLLDK	A0A0A0MQR2	20_55030037_A_G	rs6024888	0.0015896550107262794	3.925415682387824e-06	11.0	6.829767323968287e-09	-0.4358210849390227	1.101503653349715e-06	-0.39433084722111467	0.2544090086043141	-0.2570197873628376	0.5210116670359448	-0.05026741999158468	False	55030037,55030081,55035501,55040775,55045164,55047046,55049148,55053818,55055177,55055367,55059949,55061908,55062564,55064228,55064835,55069291,55072472,55073164,55075991,55076035,55079622,55080052,55081162,55081256,55081489,55084232,55085166,55086158,55087997,55088404,55097072,55098112,55099170,55099470	20_55088404_A_G;	20_55072471_TA_T;20_55059949_T_TG;			20_55087997_C_T;20_55086158_G_A;20_55085166_T_C;20_55084232_A_G;20_55081489_T_G;20_55081256_G_A;20_55081162_A_C;20_55080052_T_C;20_55079622_G_A;20_55076035_T_A;20_55075991_G_A;20_55072472_A_G;20_55072471_TA_T;20_55069291_T_G;20_55064835_T_G;20_55064228_T_C;20_55062564_G_A;20_55061908_A_G;20_55059949_T_G;20_55059949_T_TG;20_55055367_C_A;20_55055177_C_T;20_55053818_T_C;20_55049148_A_G;20_55047046_C…			0.19801980198019808	20	1	55043647	55093943
ENSG00000027001	ENSG00000027001	LNTNVDLYQSLQK	Q99797	13_24331120_T_C	rs111524599	0.01040776725608299	1.3966217022556194e-05	28.0	3.6350421448876708e-09	-0.7907590422811529	5.224696726894933e-05	-0.6059408497258971	0.16077451091787082	-0.2549295548041249	0.020932469304205063	-0.32530670792356164	False	24331120,24396603,24443645					13_24443645_C_T;13_24396603_A_G;13_24331120_T_C;			0.10643564356435643	13	-1	24304328	24463558
ENSG00000028116	ENSG00000028116	TNLLDELPQSVLK	Q86Y07	2_58481863_T_C	rs6753170	0.006321561447538421	1.472534755439527e-05	15.0	6.488808264129543e-08	0.4273317846654712	1.1397192542995747e-10	0.4939772356857934	0.9185259387543524	0.1227409477173331	0.5493182959440237	-0.04666251453954296	False	58481863,58316814,58335681,58338086,58344189,58354971,58361134,58362161,58371153,58373205,58379520,58380658,58385353,58388696,58393298,58396220,58405260,58408687,58409069,58412472,58416115,58419649,58439040,58444610,58482646	2_58316814_A_G;			2_58316814_A_G;	2_58385353_T_C;2_58380658_G_C;2_58379520_T_A;2_58373205_C_T;2_58371153_T_C;2_58362161_G_A;2_58361134_G_A;2_58354971_G_A;2_58344189_G_A;2_58338086_A_G;2_58335681_T_C;	2_58385353_T_C;2_58380658_G_C;2_58379520_T_A;2_58373205_C_T;2_58371153_T_C;2_58362161_G_A;2_58361134_G_A;2_58354971_G_A;2_58344189_G_A;2_58338086_A_G;2_58335681_T_C;2_58316814_A_G;		0.35396039603960394	2	1	58134786	58387055
ENSG00000028310	ENSG00000028310	SYPDVSVDISMLSSLGK	Q9H8M2	5_683483_G_A	rs57966672	0.059285784427484015	0.0002499322471975376	13.0	1.96720332036726e-06	-1.1558106567953157	0.7483568526123209	-0.04231247052338283	1.8883950713373687	-0.21120005430396216	0.8531226011649773	-0.028322176240786787	False	683483								0.07673267326732673	5	-1	850406	892939
ENSG00000029534	ENSG00000029534	ISEILLDHGAPIQAK	P16157-3	8_41609623_C_T	rs60792897	5.896129802740668e-06	4.891687603087466e-09	15.0	5.134585019216432e-12	-0.9335127748607536	2.771155221461583e-06	-0.4650159122108004	1.317723242012384e-14	-0.7168217396783578	9.125515919474179e-20	-0.7925159133237165	False	41609623,41609843,41610643,41612255,41613496,41614567					8_41614567_G_A;8_41613496_T_C;8_41612255_C_T;8_41610643_C_T;8_41609843_G_A;8_41609623_C_T;			0.3886138613861386	8	-1	41510739	41754280
ENSG00000029639	ENSG00000029639	FIPGLQMLSDAAPGK	Q8WVM0	6_155635585_A_C		4.023000650297732e-05	4.6900617114061726e-08	15.0	3.4276535846364746e-13	-0.7288910792447462	1.0522466307749586e-12	-0.70035666461487	1.4023947221623707e-33	-1.0508668896132851	7.614830097014476e-36	-0.9667589687872848	False	155635585,155624598,155625104,155627230,155629985,155632938,155635281,155635624,155635637,155635808,155635812,155635813,155637025,155637821,155642699		6_155635281_G_GTC;6_155624596_TCC_T;		6_155635585_A_C;	6_155635281_G_GTC;6_155632938_T_C;6_155629985_C_T;6_155627230_G_A;6_155625104_A_G;6_155624598_C_T;6_155624596_TCC_T;			0.3910891089108911	6	-1	155578643	155635627
ENSG00000031691	ENSG00000031691	ANEEGLALLQEEIDK	Q7L2Z9	6_49454667_C_A		0.023006872916021225	0.00011134380680775566	9.0	9.644047506935448e-07	0.5566790046817136	0.0005853573820377607	0.3456379853325229	1.642319806734839e-22	0.7780747031936633	8.042233419724394e-24	0.8109967781978182	True	49454667,49342165,49345141,49347535,49350785,49353014,49361552,49370279,49370724,49370737,49371403,49371854,49372796,49375279,49376281,49376681,49378668,49379536,49382193,49383804,49384048,49385182,49386564,49387292,49393500,49398115,49400237,49403282,49406056,49406348,49407053,49407069,49413244,49413289,49413391,49421607,49423547,49425521,49426018,49427409,49433198,49436199,49446509,49446995,494…	6_49459978_A_G;	6_49450368_CTCGGCGA_C;		6_49460152_A_G;	6_49457835_A_G;6_49456545_G_A;6_49453672_A_T;6_49451240_C_T;6_49451187_G_A;6_49450368_CTCGGCGA_C;6_49446995_A_G;6_49446509_G_A;6_49436199_T_C;6_49433198_T_C;6_49454667_C_A;			0.3465346534653465	6	1	49431091	49460820
ENSG00000034533	ENSG00000034533	IVIDGYALFHR	D6RG30	3_130597211_C_T	rs2669860	0.06492501674404537	0.0007396029189940313	5.0	6.15118404672698e-05	-1.4714007831543099	0.15010277928334806	-0.2249901911758552	0.015241362748225403	-0.4828144955862078	0.036367713429852594	-0.24871745499430445	False	130597211,130627278,130641987								0.10396039603960396	3	-1	130732719	130746493
ENSG00000035115	ENSG00000035115	IIPAHVIAK	Q96HL8	2_217334_G_C	rs6709534	0.009682491936458466	0.0003591686610389045	1.0	1.2823424800502225e-07	-1.0490988098394884	1.0434538861872213e-07	-0.6727672440599364	2.2346112685723933e-27	-0.9991771556911464	1.848762899283605e-23	-0.9136184667947012	False	217334,211317,212548,214837,217560,218386,220889,221560,221981,222336,224919,226933,227066,227201,228088,229456,230912,231741,234668,237346,239597,239969,242132,242426,243929,249092,254215,256116,258210,262335,264019,264227,264621,267367,268191,268293,269679,271797,272203,274672,277003,280819,281178,282137,285421,285471,286756		2_237346_GGTGACACTACCA_G;2_234668_A_AAC;	2_224919_A_G;	2_264019_C_A;2_242132_G_A;2_239969_C_T;2_239597_C_G;2_230912_A_C;2_218386_G_A;	2_264621_A_C;2_264227_G_A;2_264019_C_A;2_262335_A_G;2_258210_T_C;2_256116_G_T;2_254215_G_A;2_249092_A_C;2_243929_G_A;2_242426_A_G;2_242132_G_A;2_239969_C_T;2_239597_C_G;2_237346_GGTGACACTACCA_G;2_234668_A_AAC;2_231741_C_T;2_230912_A_C;2_229456_A_G;2_228088_G_A;2_227201_C_T;2_227066_G_A;2_226933_A_G;2_224919_A_G;2_222336_T_C;2_221981_C_T;2_221560_G_A;2_220889_G_A;	2_258210_T_C;2_256116_G_T;2_254215_G_A;2_249092_A_C;2_243929_G_A;2_242426_A_G;2_242132_G_A;2_239969_C_T;2_239597_C_G;2_237346_GGTGACACTACCA_G;2_234668_A_AAC;2_231741_C_T;2_230912_A_C;2_229456_A_G;2_228088_G_A;2_227201_C_T;2_227066_G_A;2_226933_A_G;2_224919_A_G;2_222336_T_C;2_221981_C_T;2_221560_G_A;2_220889_G_A;	2_224919_A_G;	0.3663366336633663	2	-1	217730	266398
ENSG00000035862	ENSG00000035862	YQMGCECK	P16035	17_77069621_C_T	rs62063772	0.024193506839649083	0.0005341273198414809	2.0	1.3933390296173983e-05	-1.2371629638594794	0.18821509688267285	-0.1972401752555471	1.683934079516204	-0.0877558791898842	0.1128202388386076	0.1388601995750149	False	77069621,77072510								0.30445544554455445	17	-1	76849059	76921469
ENSG00000037757	ENSG00000037757	EIIIEERPGQELTDVNGVR	Q9BV20	19_13870153_C_A	rs371671	9.394743115629758e-06	9.073710422965885e-09	14.0	7.908526404693307e-12	-0.775176628817323	1.987061313509292e-12	-0.6721456418368261	1.6580151847117776e-21	-0.8251563030292806	3.9291008851013686e-23	-0.8430105581465216	False	13870153,13869251,13870227,13870393,13871411,13871554,13871830,13871858,13872240,13872531,13872597,13874258,13874898,13875186,13875210,13875234,13875258,13875626					19_13875626_T_C;			0.4826732673267327	19	1	13875346	13885096
ENSG00000040275	ENSG00000040275	EVLPVDITTAK	Q96EA4	5_169047788_A_G	rs2338690	0.0043594655554654175	9.911432996750377e-06	14.0	7.356087874618302e-10	0.5476619830972806	3.0444374309669656e-07	0.42677520869300656	1.925044584375304e-18	0.0736359498126212	0.002251352672562123	-0.16717303785941998	False	169047788								0.31683168316831684	5	1	169010638	169031782
ENSG00000042088	ENSG00000042088	SSVPLYLIYPSVENVR	Q9NUW8	14_90408339_T_C	rs4904629	0.000642577989717645	6.753034629806011e-07	23.0	1.3221317225477356e-10	-0.5698590729335609	2.0469956747027825e-14	-0.6681006134707395	2.348835303161049e-16	-0.6281593377954271	2.3623764477496885e-23	-0.6708254769153642	True	90408339,90396574,90422664					14_90422664_T_C;	14_90422664_T_C;		0.4554455445544554	14	1	90421283	90511106
ENSG00000042493	ENSG00000042493	MQYAPNTQVEILPQGHESPIFK	P40121	2_85605205_C_T	rs6731111	6.985334452209773e-12	1.5431377367019312e-15	13.0	5.894766614731249e-23	-1.182366297008372	0.6266000577289718	0.03640969383437387	2.6408541238889842e-05	-0.056197677199115885	6.857504754540317e-08	0.3354429328347739	False	85605205,85594106,85622059,85626581,85629817	2_85622059_T_C;				2_85629817_A_G;2_85626581_A_T;			0.32673267326732675	2	-1	85621871	85645555
ENSG00000043514	ENSG00000043514	ATALIEDIFAR	Q9H3H1	1_40303627_C_T	rs12123609	4.189349045241479e-08	2.5064909927255465e-11	12.0	2.7386908963648566e-16	-1.3060223155597352	0.0005320664579008318	-0.5863726953862571	3.473352554268584e-24	-1.4369909625339872	1.7391683818923473e-25	-1.5982841644157997	False	40303627,40312053,40313107,40317445,40321194,40329424,40330141,40339467,40345512,40346661		1_40312053_TG_T;			1_40346661_G_A;1_40345512_C_A;1_40339467_G_A;1_40330141_C_T;1_40321194_T_C;1_40317445_C_G;1_40313107_G_A;1_40312053_TG_T;	1_40346661_G_A;1_40345512_C_A;1_40339467_G_A;1_40330141_C_T;1_40321194_T_C;1_40317445_C_G;1_40313107_G_A;1_40312053_TG_T;		0.10396039603960396	1	-1	40306723	40349183
ENSG00000044090	ENSG00000044090	ILLDLEQALSSEGTQENK	Q14999	6_42835487_C_T		0.06256235351113187	0.00018352535254088145	19.0	1.400027217242769e-07	0.92281902039332	0.061700111119900765	0.3499230029012038	0.0015402426043367207	0.31920317834064393	1.2136367526451555e-05	0.33174470530327244	True	42835487,42842878,42846750,42847952,42848071								0.07920792079207921	6	-1	43005355	43021683
ENSG00000044115	ENSG00000044115	SKLDAEVSK	P35221	5_137784022_G_A	rs55913696	0.05161485679879458	5.840576946032131e-05	46.0	1.0417805396346808e-05	-1.1495407922935188	0.7262154290329604	-0.04873428866047559	15.182718373233948	-0.15978460568110187	0.27790904783417303	-0.12664931739521154	True	137784022,137601515								0.08168316831683169	5	1	137946656	138270723
ENSG00000047188	ENSG00000047188	VVLIVGETGSGK	Q9H6S0	5_112882133_C_A	rs6877432	0.04673882412208751	5.081095959847997e-05	47.0	1.7671410880479742e-08	0.6084178492446011	7.191057477568934e-11	0.8002259482547652	1.0526754036186602e-12	0.6611751949813945	4.2085660633921646e-15	0.8710606697962786	False	112882133,112833106,112834687,112836087,112836243,112837130,112838128,112838232,112843077,112845543,112846065,112846369,112846555,112848230,112848654,112849297,112849478,112850526,112851109,112851439,112851899,112852038,112852624,112853189,112857917,112859769,112860285,112863466,112864239,112865189,112869102,112870235,112870387,112870454,112870711,112872217,112872266,112872471,112872494,112872560…	5_112889374_G_A;5_112888882_A_T;	5_112912534_A_AT;5_112910505_CCTA_C;5_112910504_TC_T;5_112897170_A_AA;5_112897094_ATATT_A;5_112897093_AAT_A;5_112889821_CCTCTA_C;5_112889566_ATCT_A;5_112885653_AAAG_A;5_112883309_CT_C;5_112880393_GT_G;5_112876889_AT_A;5_112876889_ATT_A;5_112873854_TTGTC_T;5_112872560_AAC_A;5_112872471_CAG_C;		5_112930952_A_G;5_112930565_T_C;5_112930203_G_A;5_112930092_G_C;5_112892000_G_A;5_112889374_G_A;5_112888882_A_T;5_112849478_A_G;	5_112928865_G_T;5_112926181_T_C;5_112925149_C_G;5_112922214_G_C;5_112922054_T_G;5_112921133_G_A;5_112920993_T_C;5_112920871_T_C;5_112919941_G_A;5_112919760_T_C;5_112919585_T_G;5_112919539_G_A;5_112917838_T_C;5_112916869_G_A;5_112916780_T_G;5_112916748_G_A;5_112916398_T_C;5_112916239_A_G;5_112915077_C_T;5_112914843_C_G;5_112914566_C_T;5_112914284_T_C;5_112913408_G_C;5_112912534_A_AT;5_112911703_T_…	5_112895959_G_A;5_112895629_T_C;5_112895297_A_G;5_112894805_A_G;5_112894479_T_C;5_112894326_T_C;5_112893179_C_A;5_112893010_C_T;5_112892836_A_G;5_112892124_T_A;5_112892000_G_A;5_112891219_G_A;5_112891104_G_A;5_112890864_G_T;5_112890578_C_T;5_112889821_CCTCTA_C;5_112889608_T_A;5_112889566_ATCT_A;5_112889374_G_A;5_112889065_G_A;5_112888882_A_T;5_112888676_G_T;5_112887996_A_G;5_112886139_A_G;5_11288…	5_112917278_T_G;5_112899702_A_G;	0.16584158415841585	5	1	112849380	112930982
ENSG00000047849	ENSG00000047849	IPLYPSEEAPK	P27816	3_47943861_T_C	rs319696	0.0037550913304215134	1.4233246369533659e-06	82.0	8.570007549810676e-10	0.661900602157395	0.6950181675157523	0.16970857750933674	3.7277815510792487e-10	0.4875750061458777	0.002594141039429625	-0.1333100813171636	False	47943861,47749708,47750904,47751057,47752748,47753513,47754135,47757261,47759990,47762030,47762483,47762534,47764213,47765547,47765655,47768075,47768991,47769075,47770380,47771068,47771287,47774078,47774348,47775282,47778009,47781166,47781363,47782319,47784650,47785481,47785795,47786895,47786903,47790063,47790265,47791875,47792785,47795159,47796376,47797556,47799694,47800031,47800507,47801061,478…	3_47958037_G_T;3_47956424_C_G;3_47953733_C_A;3_47953405_A_C;	3_48126302_GT_G;3_48093049_TTGA_T;3_48093051_G_GT;3_48093050_TG_T;3_48093049_TTGA_T;3_48090946_CA_C;3_48085348_TA_T;3_48079518_AT_A;3_48070261_CA_C;3_48064387_GA_G;3_48054456_CTGT_C;3_48044259_T_TACTC;3_48043736_AG_A;3_48029747_ATT_A;3_48027850_TG_T;3_47997826_CAA_C;3_47995224_G_GC;3_47991379_CA_C;3_47981199_GT_G;3_47971964_AC_A;3_47964055_TA_T;3_47947181_AC_A;3_47944636_AG_A;3_47929013_CT_C;3_47…	3_47913592_TGGAAATAGGAAAGTGGGAATGAGGCCTGCAGGTCAGCAATAGCCCCAAGGAGTCACGCTACAAGATGCTTCTTTTTTTGTTTGTTTTGTTTTGTTTTTGGAGACGAAGTCTCACTCTGTTGCCCAGGCTGGAGTGCAGTGGCATGATCTCGGCTCACTGCAGCCTCCGCCTCCCAGGTTCAAGCAATTCTCCTGACTCAGCCTCCAGAGTAGCTGGGACTACAGGCACGTGCCACCACGCCCAGCTAATTTTTTGTATTTTTAGTAGAGACAGGGTTTCACCGTGTTAGCCAGGATGATCTCGATCTCCTGACCTCATGATCCGCCTGCCTCAGCCTCCCAAAGTGCTGGGATTACAGGCATGAGCCACTGCACCTGGACACAAGAT…	3_48016172_T_C;3_47892579_G_C;3_47892376_C_CCTT;	3_48126302_GT_G;3_48123796_C_G;3_48123540_C_T;3_48122410_A_C;3_48121072_G_A;3_48119763_A_G;3_48118703_T_C;3_48117970_T_C;3_48115740_T_C;3_48115088_C_A;3_48113624_A_G;3_48109969_C_T;3_48109566_A_G;3_48104449_C_A;3_48099750_G_A;3_48093133_A_T;3_48093051_GA_AT;3_48093049_TTGA_T;3_48093051_GA_AT;3_48093051_G_GT;3_48093050_TG_T;3_48093049_TTGA_T;3_48092017_C_A;3_48091207_C_T;3_48090946_CA_C;3_48086398…			0.3316831683168317	3	-1	47892182	48130769
ENSG00000054983	ENSG00000054983	SLWTDIPVNFPK	P54803	14_88391765_A_G	rs10142867	0.003609922781919793	1.0013709893606308e-05	11.0	8.00811961165288e-10	0.5462057942847203	2.0015879293166305e-13	0.6202683128327873	1.639814021986599	0.15832761558761071	0.6554573291535426	-0.027632254722292054	False	88391765,88391116,88391333,88401904,88404382,88404706,88405899,88410227,88410434,88410811,88412509,88414875,88416017,88419003,88419374,88424275,88426007,88427075,88429033,88429304,88430294,88431898,88432942,88434134,88439723,88443665,88444882,88445416,88446687,88449847,88451251,88453186,88453278,88453833,88454691,88455786,88461649,88463019,88464880,88467755,88470049,88479054,88479226,88482577,884…		14_88439723_TTATATA_T;		14_88431898_C_T;	14_88455786_C_G;14_88454691_C_T;14_88453833_T_C;14_88453278_T_G;14_88453186_A_G;14_88451251_A_G;14_88449847_G_C;14_88446687_T_C;14_88445416_G_A;14_88444882_A_C;14_88443665_A_G;14_88439723_TTATATA_T;14_88434134_C_T;14_88432942_A_G;14_88430294_G_A;14_88429304_C_T;14_88429033_T_C;14_88427075_A_G;14_88426007_T_C;14_88424275_T_A;14_88419374_T_C;14_88419003_A_T;14_88416017_G_A;14_88414875_C_T;14_884125…	14_88455786_C_G;14_88454691_C_T;14_88453833_T_C;14_88453278_T_G;14_88453186_A_G;14_88451251_A_G;14_88449847_G_C;14_88446687_T_C;14_88445416_G_A;14_88444882_A_C;14_88443665_A_G;14_88439723_TTATATA_T;14_88434134_C_T;14_88432942_A_G;14_88431898_C_T;14_88430294_G_A;14_88429304_C_T;14_88429033_T_C;14_88427075_A_G;14_88426007_T_C;14_88424275_T_A;14_88419374_T_C;14_88419003_A_T;14_88416017_G_A;14_884148…	14_88431898_C_T;	0.3787128712871287	14	-1	88304164	88460009
ENSG00000055609	ENSG00000055609	MDNDHVIDATLTGGPAR	Q8NEZ4-3	7_152182594_G_T	rs77143392	0.08115360252737278	0.00039814499265553233	13.0	7.406440909971344e-07	1.0508869212199428	0.5949435858857031	0.04587393261849737	0.039492065932344236	0.04131305055311872	0.6303555615632248	-0.015615714700746328	True	152182594,152179384,152194795,152195143,152196383,152196565,152196696,152196720,152197813,152197904,152198361								0.4826732673267327	7	-1	151832010	152133090
ENSG00000056050	ENSG00000056050	FYYDPPEFQTIIIGDNK	Q9NWY4	4_170678993_T_C	rs11540095	0.00039615196983127884	5.325935020150368e-07	17.0	5.6186033183586455e-11	-0.6600900134531233	1.2461604550044785e-12	-0.869198063972207	7.673982224657795e-26	-1.1582342424073326	3.7325606831369084e-30	-1.2405919509279435	False	170678993							4_170678993_T_C;	0.16336633663366334	4	-1	170650616	170679104
ENSG00000058673	ENSG00000058673	AAVAVVPLVSEDK	O75152	1_203852665_T_G		0.0001905504593184042	1.250393839590867e-07	31.0	0.004190209349183649	0.24997886227366475	0.4523033327264749	0.08382954073833404	0.08646665243855632	0.2808092077909713	0.7488541371118029	0.031419099968954936	False	203852665								0.150990099009901	1	1	203764782	203823252
ENSG00000064042	ENSG00000064042	ASVLDTSMSAGSGSPSK	G5EA03	4_41363521_G_A	rs115995457	0.01285204268099148	3.8328640463924655e-05	13.0	3.051398746151913e-10	1.6605482797802755	3.839140255167676e-06	1.3032959710514416					False	41363521,41352988,41356156,41356736,41359590,41365130,41365301					4_41365301_G_C;4_41365130_A_G;4_41363521_G_A;			0.04702970297029703	4	1	41361624	41702061
ENSG00000064651	ENSG00000064651	TATQPLLK	P55011	5_127661976_G_A	rs32215	0.010868272332441769	2.0677938265624523e-05	20.0	0.0014503877828419627	0.293826534710853	0.2563008480847414	0.10835275091011276	0.18326555147546167	0.1804683994949904	0.02718255279966951	0.13137615415823764	False	127661976								0.2945544554455445	5	1	127419458	127525380
ENSG00000064932	ENSG00000064932	ELPVNTLDELIDQLGGPQR	K7ES28	19_1213123_A_G	rs8106285	0.07366129750870541	0.0014971312795421955	3.0	4.869541141544982e-08	1.5070897936769372	0.17591048273759732	0.1204542504835544	1.9800331376276024	0.1045410755829925	0.5930970998057372	-0.02553613656086169	False	1213123								0.4207920792079208	19	-1	1107636	1174282
ENSG00000065534	ENSG00000065534	IEGYPDPEVVWFK	Q15746-6	3_123635213_A_G	rs67028142	0.024496652761071352	3.903575781038767e-05	28.0	1.5509685299202749e-07	0.6041941257195907	9.501119656913656e-09	0.5738538018027434	3.4797571842037706e-11	0.5006225153438404	7.126273450338678e-17	0.6945298642061587	True	123635213,123543783,123556171,123559835,123568102,123568826,123571754,123594419,123599681,123600144,123604942,123605216,123606952,123607884,123610343,123610607,123611565,123611567,123620718,123624252,123624772,123625634,123626813,123645893,123650432,123652895,123653909,123654633,123664105,123665902,123666192,123670721,123672787,123674337,123676696,123678162,123688760,123696930					3_123600144_A_G;3_123599681_C_T;3_123594419_T_G;3_123571754_G_A;3_123568826_C_T;3_123568102_T_C;3_123559835_T_G;3_123556171_C_A;3_123543783_C_T;	3_123600144_A_G;3_123599681_C_T;3_123594419_T_G;3_123571754_G_A;3_123568826_C_T;3_123568102_T_C;3_123559835_T_G;3_123556171_C_A;3_123543783_C_T;		0.3217821782178218	3	-1	123328896	123603178
ENSG00000065675	ENSG00000065675	IEDFILHK	A0A087X0I9	10_6674774_G_A		3.599992459491647e-05	3.422273554487293e-08	18.0	7.667092463258124e-13	0.6933984680701131	1.2559932711922285e-17	0.8218501922845793	2.5937122671871424e-24	0.9186405477003916	1.6941687283791735e-26	0.9293356173164842	False	6674774								0.2920792079207921	10	-1	6469105	6622263
ENSG00000065833	ENSG00000065833	VRGSEYDDFLDEFMEAVSSK	P48163	6_84185673_G_T		0.017213132579663473	3.0448127719462373e-05	23.0	5.764082491399963e-08	1.2333340131659265	0.2752233478927853	0.11570223192576055	0.08726957484920746	0.2047113307859423	0.09258733880669852	0.14866001524723588	False	84185673								0.1707920792079208	6	-1	83920108	84140797
ENSG00000066084	ENSG00000066084	VVIVNPETK	Q9P265	12_51138862_C_T	rs1047912	2.9465704059818828e-05	1.3341133564594289e-08	37.0	1.5077061727647376e-11	0.618346691588269	1.0640364929041229e-15	0.6589861166716231	4.6881442533223216e-34	1.2293399059819552	6.986253780366784e-17	0.4496342898859839	False	51138862,50893518,50898728,51046224,51064064,51073523,51074873,51117593,51128832,51138687				12_51138687_A_C;12_51138862_C_T;	12_51128832_A_G;12_51117593_C_A;12_51074873_T_A;12_51073523_G_A;12_51064064_A_G;12_51046224_G_A;	12_51138687_A_C;12_51128832_A_G;12_51117593_C_A;12_51138862_C_T;		0.297029702970297	12	1	50898768	51142450
ENSG00000066926	ENSG00000066926	DLMTLPIQNK	P22830	18_55240505_C_T	rs1041951	9.8300687068256e-06	8.454423696339478e-09	16.0	3.565328204905237e-13	-1.0841928567227628	0.4599319222278964	0.0984985272836929	0.047116573734380496	-0.3464684340627204	0.04995557314854331	0.15534085838477665	False	55240505,55245189,55247118,55249586,55249968,55264579,55275076,55281356,55282457,55286636,55291586,55294479,55294630,55295858	18_55240505_C_T;	18_55249968_ACC_A;			18_55249968_ACC_A;18_55249968_A_G;18_55247118_C_T;	18_55249968_ACC_A;18_55249968_A_G;18_55247118_C_T;18_55240505_C_T;		0.16831683168316833	18	-1	55215515	55254004
ENSG00000067533	ENSG00000067533	LEWEMMCR	Q9Y3B9	1_218437874_G_A	rs1933639	0.01266018888601979	6.116490681740445e-05	8.0	6.977770714430946e-07	-1.3370087110277735	0.5049880418424963	-0.07895388824647133	0.6312732447528282	-0.05385800155476917	0.07143124042525441	-0.14503740596083814	False	218437874								0.13861386138613865	1	1	218458629	218511325
ENSG00000068745	ENSG00000068745	ELLGPVLK	Q9UHH9	3_48768586_C_T	rs62261476	0.08249691654102377	0.0017571438487857165	3.0	4.847376270906512e-05	-0.8056868544023956	0.9220141383512288	-0.01466184819223626	0.56951808264611	-0.18053636135463969	0.17330513635329858	-0.1432435318069913	False	48768586,48779418,48860623,48961019,48995818,49187139,49193969					3_48768586_C_T;	3_48768586_C_T;		0.099009900990099	3	-1	48725436	48777786
ENSG00000068878	ENSG00000068878	RDPGSVGDTIPSAELVK	Q14997	2_53917392_T_A	rs13023109	0.07081565068628554	7.389863103384562e-05	57.0	3.8500205316975546e-07	0.4269079903088082	8.772296420940564e-08	0.28970736546159426	1.9179018575755853e-05	0.24000591118073256	2.0936342043352e-11	0.32901384362417324	False	53917392								0.3688118811881188	2	-1	54091204	54197977
ENSG00000069998	ENSG00000069998	AQELSALLGCEVDADQVILSHSPMK	Q9BXW7-2	22_17630486_C_A	rs1034859	0.06955292220764249	0.0002043226325472805	20.0	1.1502168132499106e-07	-0.40607662559548185	1.1464156188873327e-06	-0.4553650147546873	2.4842566186731766e-18	-0.44038421341490863	0.0004786824541105953	-0.2837426381449236	False	17630486,17629544					22_17629544_G_A;22_17630486_C_A;		22_17630486_C_A;	0.4257425742574257	22	-1	17618401	17646177
ENSG00000070501	ENSG00000070501	NVSQAIHK	P06746	8_42383084_G_A	rs6980507	0.01765261822309246	4.816078682380138e-05	15.0	0.0004717125799040153	0.7505427117925834	0.8287456906467003	0.015142341595481834	2.586706800040082	0.14938135002146638	0.4743935720266738	0.04492196272609738	True	42383084,42352007,42354102,42355041,42356035,42359035,42360593,42367068,42367290,42382222,42382522,42383452,42383493,42383870,42384059,42384331,42385748,42387128,42388301,42389105,42389743,42391195,42391945,42392942,42394425,42395632,42397004,42397529,42397731,42398302,42400679,42400732,42400743,42401205,42401987,42402461,42402499,42404040,42404177,42404737,42405155,42406008,42407047,42408439,424…								0.3811881188118812	8	1	42195972	42229326
ENSG00000070950	ENSG00000070950	SEFQLLVDQAR	Q9NS91	3_8977159_G_A	rs428961	0.033386282309678134	0.00012292332474729846	13.0	8.621922367197926e-08	0.4497353295613644	0.01693560582963104	0.18677986803088534	0.00554304957782337	0.21711626388838512	0.0007886255863374335	0.2375722058881303	False	8977159,8939203					3_8939203_G_A;3_8977159_G_A;	3_8939203_G_A;3_8977159_G_A;		0.33910891089108913	3	-1	8817088	9005457
ENSG00000071127	ENSG00000071127	LHHVSSLAWLDEHTLVTTSHDASVK	O75083	4_9877617_C_G	rs73225813	0.05387009797901866	0.0001052863787233024	27.0	3.462192019212255e-07	-0.8468126789718542	0.8937477039642244	0.015113804120667318	2.045560477730909	-0.2195956606968742	0.7357564000484247	-0.03877359646046937	False	9877617								0.07425742574257425	4	-1	10075963	10118573
ENSG00000073578	ENSG00000073578	HTLSYVDVGTGK	P31040	5_299307_A_C		3.137799062370974e-17	8.343767865584336e-22	27.0	4.43041283700666e-39	-1.7147110225811724	0.0017878015011345493	0.2650566557690892	2.5498577608619936e-26	-0.3624856338418853	1.509014765707139e-08	0.3691435611157899	True	299307								0.13861386138613865	5	1	218356	256815
ENSG00000076242	ENSG00000076242	SIFGNAVSR	P40692	3_37053568_A_G	rs1799977	1.3636933439721805e-05	5.292316888469018e-09	37.0	1.857751092305056e-11	-1.1875881256539844	4.100922589292703e-05	-0.3895075636947427	0.0012613496825767086	-0.4234639336594247	0.02399715226877417	0.1371460480006716	True	37053568,36972760,37068079,37078199,37102696,37118345,37121844,37131815,37202988,37209341,37248492	3_37053568_A_C;3_37053568_A_G;3_37053568_A_C;			3_37053568_A_C;3_37053568_A_G;3_37053568_A_C;	3_37102696_G_A;3_37068079_T_C;	3_37068079_T_C;3_37053568_A_C;3_37053568_A_G;3_37053568_A_C;		0.3564356435643564	3	1	37034823	37107380
ENSG00000076382	ENSG00000076382	VLQEALAGQLDSNCQPMATNWIQEK	Q96R06	17_26827495_G_A	rs12451081	0.07457419248120736	9.9969767593398e-05	46.0	2.054284588049988e-06	-1.4091619132417048	0.0012457478498795508	-0.5859715152994198	1.1160808250814516	-0.3883245118280617	0.4209731851374726	0.10193248567908332	False	26827495								0.054455445544554455	17	-1	26904588	26926297
ENSG00000079739	ENSG00000079739	IDAMHGVVGPYVK	P36871	1_64097432_C_T	rs1126728	4.27542036280317e-17	1.1937275154410347e-21	30.0	2.690119126668745e-29	-1.258968080938044	0.019608625458506845	-0.16448718638476345	2.335589959777684	-0.08551536005614749	0.7582042417301643	-0.022123498727183083	False	64097432,64098065,64098405,64098590	1_64097432_C_T;				1_64098590_A_G;1_64098405_C_T;1_64098065_T_C;			0.22524752475247525	1	1	64058947	64125916
ENSG00000079819	ENSG00000079819	SSHETLNIVEEK	E9PHY5	6_131504401_T_C		2.8611801105967944e-10	2.2385683986775486e-14	52.0	1.2244835486241485e-11	0.8442928710450077	4.318384007625628e-11	0.806386504443917	1.0675457955702493e-09	0.513262930093063	1.0529144905461296e-16	0.6591045082458211	False	131504401,131505231,131507621,131511289,131517694,131520994,131522482,131524618,131530313,131533313,131533388,131534709,131536251,131538761,131539119,131539974,131543082,131549188,131552850,131554158,131555391,131559066,131565917,131567214,131584810,131586300,131586301,131590957,131592862,131597369,131604844,131604974,131609703,131610484,131612504,131615814,131616820,131617131,131617237								0.14356435643564355	6	-1	131160487	131384462
ENSG00000080608	ENSG00000080608	SEMIEAIR	Q15397	9_2699874_G_C	rs75822592	0.07350831387733786	0.00017084571436223718	26.0	2.352904088695552e-07	-0.7734447070841727	0.10531491562317977	-0.1914348807047075	1.583331940810076	-0.0919073946621279	0.5838870314829792	-0.05029633302243065	False	2699874,2700575,2700666,2700716,2701429,2707310,2707311,2707834,2711512								0.0891089108910891	9	-1	2720469	2844241
ENSG00000084072	ENSG00000084072	HVVFGEVTEGLDVLR	Q9UNP9	1_40202174_C_T	rs35895054	0.0016579633518078178	3.273470779565513e-06	14.0	2.0858953127642747e-08	-0.5536775347362144	1.6492203080896096e-07	-0.3675367278699756	7.012164091252336e-21	-0.8775651255001881	0.4672123705142717	0.04103003142475715	True	40202174,40202722					1_40202722_A_T;1_40202174_C_T;			0.2896039603960396	1	1	40157854	40229586
ENSG00000084093	ENSG00000084093	IELSPPIEVVQK	Q13127	4_57709199_C_T	rs141440835	0.007865036095647041	3.5645356242985715e-05	8.0	2.1929898937690258e-10	-1.7274791733923496	0.11080730523141427	-0.2803434164562283	0.20823136477441587	-0.2292726532090336	0.5939937569286964	-0.0326813168484385	True	57709199,57715766,57716497,57717913,57720234,57726062,57726143,57748143,57748298,57748435,57751942,57754167,57762807,57766923,57774964,57775996,57778948,57790134,57797100,57799222,57802221,57803206,57809549,57809986,57810357,57810821,57815050,57816688,57818081,57818365,57818564,57820817,57830213,57833717,57840543	4_57797100_G_T;	4_57799222_CTT_C;		4_57799222_CTT_C;	4_57790134_G_A;4_57778948_G_A;4_57775996_T_A;4_57774964_C_G;			0.06930693069306931	4	1	57774075	57802010
ENSG00000084623	ENSG00000084623	DPIVNVWYSVNGER	Q13347	1_32879586_T_C	rs10914555	0.02114638263289329	3.905585962654124e-05	23.0	0.003635118751687115	-0.4611336225330081	0.40248218493044063	-0.12196128069137302	1.3913463532205728	-0.18837614670453587	0.7445076042022689	-0.019807801253051715	True	32879586,32875382,32875767,32876267,32881631,32881633,32881695,32890941								0.12623762376237624	1	1	32687529	32697205
ENSG00000085063	ENSG00000085063	FEHCNFNDVTTR	E9PNW4	11_33755956_C_T	rs3181269	0.0005658703831368549	3.307796088662584e-06	4.0	1.984405982887173e-10	-0.7350972028372715	4.579120883109809e-13	-0.8132488230055488	2.343965885471624e-20	-0.8531043310365951	2.3197064529154305e-25	-0.999343561699078	False	33755956,33757770					11_33757770_G_A;11_33755956_C_T;			0.18564356435643564	11	-1	33719807	33757991
ENSG00000085377	ENSG00000085377	VFLDPNILSDDGTVALR	P48147	6_105791133_C_G		0.05119952944503173	7.385889334006014e-05	36.0	1.4704303577260604e-08	-0.6204984983669801	0.006636371689345924	-0.2627558619588024	0.03062362772150003	-0.16810128960180715	0.04150194189683929	-0.25944350859007825	False	105791133					6_105791133_C_G;			0.056930693069306926	6	-1	105725440	105850959
ENSG00000085449	ENSG00000085449	IEGHQDAVTAALLIPK	Q8IWB7	2_224802504_A_G	rs10191160	0.061614517880022014	0.0001703117581702176	20.0	4.3121247271650287e-07	0.3995163147302607	3.171629243173547e-05	0.4782832674660682	9.580530230078395e-10	0.42983418945942015	1.7369499804283768e-12	0.5882817904239079	False	224802504,224819470					2_224802504_A_G;			0.1311881188118812	2	-1	224720433	224810104
ENSG00000085491	ENSG00000085491	IFTTGDVNK	Q6NUK1	1_108737302_C_G	rs607101	8.638280211561203e-13	6.125380957413358e-17	27.0	1.0528141702547544e-22	-0.8206381633500923	4.0991465040913076e-24	-1.045807459362873	1.5795550468462024e-29	-1.065958940278616	4.498301658909437e-35	-1.130578389564158	False	108737302,108734993,108735388,108735787,108737086,108737112,108737425,108737551,108737806,108738360,108738436,108738624,108739035,108739104,108739171,108739214,108739228,108739434,108739705,108739726,108739849,108740419,108740779,108741065,108742892,108742904,108742954,108743042,108743140,108743178		1_108742904_CGCGCAGG_C;1_108739434_AAAG_A;1_108738624_GAA_G;1_108737806_T_TCTAAA;1_108737086_AG_A;		1_108743178_C_G;1_108743140_C_G;1_108743042_C_A;1_108742954_A_C;1_108742904_CGCGCAGG_C;1_108742892_T_G;1_108735388_T_A;	1_108741065_T_C;1_108740779_G_A;1_108740419_C_T;1_108739849_C_T;1_108739705_C_T;1_108739434_AAAG_A;1_108739228_A_C;1_108739214_T_C;1_108739171_A_G;1_108739104_A_G;1_108739035_A_G;1_108738624_G_A;1_108738624_GAA_G;1_108738436_A_C;1_108738360_C_A;1_108737806_T_TCTAAA;1_108737551_T_C;1_108737425_T_C;1_108737112_G_A;1_108737086_AG_A;1_108735787_T_C;1_108735388_T_A;1_108734993_G_C;1_108737302_C_G;	1_108742892_T_G;1_108741065_T_C;1_108740779_G_A;1_108740419_C_T;1_108739849_C_T;1_108739705_C_T;1_108739434_AAAG_A;1_108739228_A_C;1_108739214_T_C;1_108739171_A_G;1_108739104_A_G;1_108739035_A_G;1_108738624_G_A;1_108738624_GAA_G;1_108738436_A_C;1_108738360_C_A;1_108737806_T_TCTAAA;1_108737551_T_C;1_108737425_T_C;1_108737112_G_A;1_108737086_AG_A;1_108735787_T_C;1_108735388_T_A;1_108734993_G_C;1_10…		0.1905940594059406	1	-1	108676658	108743471
ENSG00000085733	ENSG00000085733	QDSAAVGFDYK	Q14247	11_70278250_A_G	rs2298412	2.935382871351544e-14	1.6098884959149509e-18	24.0	3.9437576206174894e-24	1.1647554232653392	0.8064258801442595	-0.02834687508980593	8.211810868022594e-36	1.4480157646808118	0.7215047379695272	-0.02920847422457252	True	70278250,70251812,70253389,70253475,70257019,70257340,70264690,70268910,70272329,70273001,70273999,70274191,70274491,70274742,70275975,70276009,70276346,70276496,70278573,70279927,70280242,70280893,70281007,70285370,70286355,70288583,70290972		11_70273999_AT_A;11_70256066_GGTAAGTGGCCCGCGGCTGCCTATGCCAGGCTCCTGGTGTGCTTGGACCACTAGACTGGGTGGCAGAGTCGTCCCTCAGTCTTTCCTTAGATCAGCAGTTTTGAGTCCATCTGCTGAGGTTGCGATTTGCCCGGAGTAGACCCCTGTTGATTGGACTTACTCATGAAGTACTCTAGCTTTCTTCAAAGCTCTTTAGGAATCCTCAGAGGTGCTGGAGCACGGGTGTTAGTGGGGAGGCCCAGAGAGGGAGATTGGCCCTCAGAGGCAGCCTTGTGATAGGACAGAAGTCCAGAAGCATCCTGGCTCTAGGTGTCATCACTGTCAATGCCTGTGGTTCCAGTCTGTAGCCTAAGTCATGCCAGTCCGAAGA…	11_70256066_GGTAAGTGGCCCGCGGCTGCCTATGCCAGGCTCCTGGTGTGCTTGGACCACTAGACTGGGTGGCAGAGTCGTCCCTCAGTCTTTCCTTAGATCAGCAGTTTTGAGTCCATCTGCTGAGGTTGCGATTTGCCCGGAGTAGACCCCTGTTGATTGGACTTACTCATGAAGTACTCTAGCTTTCTTCAAAGCTCTTTAGGAATCCTCAGAGGTGCTGGAGCACGGGTGTTAGTGGGGAGGCCCAGAGAGGGAGATTGGCCCTCAGAGGCAGCCTTGTGATAGGACAGAAGTCCAGAAGCATCCTGGCTCTAGGTGTCATCACTGTCAATGCCTGTGGTTCCAGTCTGTAGCCTAAGTCATGCCAGTCCGAAGACCAAAGTCAAATCTGTA…		11_70281007_T_C;11_70280893_G_A;11_70280242_A_G;11_70279927_G_A;11_70278573_A_G;11_70276496_G_A;11_70276346_T_C;11_70276009_A_G;11_70275975_G_T;11_70274742_A_T;11_70274491_T_C;11_70274191_G_T;11_70273999_AT_A;11_70273001_C_T;11_70272329_C_T;11_70268910_C_T;11_70264690_A_G;11_70257340_G_A;11_70256066_GGTAAGTGGCCCGCGGCTGCCTATGCCAGGCTCCTGGTGTGCTTGGACCACTAGACTGGGTGGCAGAGTCGTCCCTCAGTCTTTCCTTAGATCAGCAG…	11_70281007_T_C;11_70280893_G_A;11_70280242_A_G;11_70279927_G_A;11_70278573_A_G;11_70276496_G_A;11_70276346_T_C;11_70276009_A_G;11_70275975_G_T;11_70278250_AC_GT;11_70278250_A_G;11_70278249_TAC_T;	11_70253475_C_T;	0.20297029702970296	11	1	70244510	70282690
ENSG00000085978	ENSG00000085978	QAFEEIILQYNK	Q676U5	2_234184417_G_A	rs3792109	0.0398506672409174	0.00011020619821188916	18.0	2.3765819481037888e-07	0.4709165476425738	5.907820835999869e-08	0.5318001117095892	1.1895429163262772e-07	0.5367147916638707	1.0573004660774592e-16	0.6267577791267454	True	234184417,234143048,234143373,234145618,234145944,234146271,234146550,234147175,234147930,234148383,234148586,234149039,234149702,234151031,234151045,234151615,234151832,234153366,234153848,234154014,234154139,234154651,234156536,234157137,234157258,234157688,234157733,234157741,234158839,234160345,234160669,234161211,234161448,234161583,234161769,234162153,234163683,234167234,234167421,234167881…	2_234183368_A_G;	2_234203578_TC_T;2_234154014_A_AG;2_234151832_TG_T;		2_234203597_T_C;2_234203578_TC_T;2_234160345_T_G;	2_234192616_G_A;2_234185999_G_A;2_234185267_C_T;2_234184952_T_C;2_234183718_T_C;2_234183468_G_A;2_234182240_C_T;2_234181848_C_T;2_234180410_A_G;2_234179690_C_T;2_234178453_C_T;2_234176609_C_T;2_234175706_G_T;2_234173503_G_A;2_234172915_G_C;2_234172846_A_G;2_234172188_C_G;2_234170369_T_C;2_234169822_C_T;2_234167881_T_A;2_234167421_C_T;2_234167234_A_G;2_234163683_G_C;2_234162153_A_G;2_234161769_C_T…			0.4306930693069307	2	1	234118697	234204320
ENSG00000087008	ENSG00000087008	FEVSSVADCLDSAVALAAYK	O15254	4_8375012_T_C	rs3756188	0.026216024940453744	9.881593701379596e-05	12.0	2.5685840560629795e-07	0.3706823414677842	4.463014940423446e-05	0.3379864274757689	5.84559145847066e-05	0.3234122499489621	0.001997847093922615	0.2770342028392461	False	8375012,8370165,8373602,8373704,8373832					4_8373832_G_T;4_8373704_G_C;4_8373602_T_G;4_8370165_T_C;4_8375012_T_C;			0.4084158415841584	4	-1	8368009	8442450
ENSG00000087206	ENSG00000087206	VILCQLEVYQK	Q96RL1	5_176364039_A_G	rs187114	0.09353219828079687	0.0003705867983073666	17.0	9.398448495219e-07	0.40848953064547455	0.08731643481623369	0.14168348070900594	7.598137879748407e-15	0.4209245134300296	0.00424855599136879	0.2290939006470927	True	176364039,176323298,176324729,176326721,176327644,176333126,176333748,176334195,176335231,176338955,176339209,176339499,176349386,176351330,176352736,176355312,176355884,176358065,176360528,176363429,176370988,176372593,176376493,176378574,176395190,176399919,176402401,176403023,176403170,176404962,176410426,176411669,176413570,176415964,176417386,176418927,176421956,176424035,176424141,176424611…		5_176424141_ACT_A;5_176424140_AAC_A;5_176424033_GCA_G;5_176411669_AAAAG_A;5_176403170_A_AT;5_176399919_CT_C;5_176360528_AT_A;		5_176378574_G_T;	5_176448139_T_C;5_176445698_T_C;5_176445494_A_T;5_176445169_T_C;5_176444861_C_T;5_176441214_C_T;5_176441199_G_A;5_176440229_G_T;5_176434440_G_A;5_176433063_C_T;5_176432947_C_G;5_176432585_T_C;5_176431759_C_G;5_176430723_T_C;5_176429898_T_C;5_176429169_A_G;5_176425581_A_C;5_176425281_G_A;5_176424611_A_G;5_176424141_ACT_A;5_176424140_AAC_A;5_176424035_A_G;5_176424033_GCA_G;5_176418927_C_T;5_1764173…	5_176433063_C_T;5_176432947_C_G;5_176432585_T_C;5_176431759_C_G;5_176430723_T_C;5_176429898_T_C;5_176429169_A_G;5_176425581_A_C;5_176425281_G_A;5_176424611_A_G;5_176424141_ACT_A;5_176424140_AAC_A;5_176424035_A_G;5_176424033_GCA_G;5_176418927_C_T;5_176417386_C_G;5_176415964_A_G;5_176413570_C_G;5_176411669_AAAAG_A;5_176410426_G_A;5_176404962_A_G;5_176403170_A_C;5_176403170_A_AT;5_176403023_A_G;5_17…	5_176402401_G_A;5_176378574_G_T;	0.457920792079208	5	-1	176332006	176449634
ENSG00000087299	ENSG00000087299	GLMAIDCPHTGIVDYR	Q9H9P8	14_50706907_C_T	rs10147736	0.007791347283083851	1.5642155475059653e-05	18.0	5.872524320722023e-07	0.3842969252502209	6.238227282083776e-06	0.36108965521688985	1.8347595607930038e-07	0.29011248532336875	8.020458643500505e-11	0.4712019595871113	False	50706907,50657114,50668831,50669770,50675261,50675487,50679963,50683094,50695799,50700257,50700697,50701441,50701767,50703512,50703997,50705665,50705999,50707815,50708946,50712942,50714194,50714332,50715564,50715642,50716266,50716288,50719213,50719615,50720062,50722664,50724091,50725086,50726076,50726235		14_50719213_GA_G;14_50705999_TAG_T;		14_50712942_G_A;	14_50726235_G_A;14_50725086_A_T;14_50722664_T_C;14_50720062_T_A;14_50719615_G_A;14_50719213_GA_G;14_50716288_C_T;14_50716266_C_T;14_50715642_C_T;14_50715564_T_C;14_50714332_C_A;14_50714194_C_T;14_50712942_G_A;14_50708946_T_A;14_50707815_G_A;14_50705999_TAG_T;14_50705665_C_A;14_50706907_C_T;			0.301980198019802	14	-1	50704281	50779266
ENSG00000087502	ENSG00000087502	MLQLIQSR	A0A087WU02	12_29418593_C_G	rs7315535	0.04442944829832965	0.000751389496968281	3.0	1.062049163717623e-05	-0.6029112710850741	0.006393117163765297	-0.2552382025064589	0.3905536602119307	-0.2075268702008817	0.08339692649134023	0.10615284250199412	False	29418593								0.4702970297029703	12	-1	29490285	29534122
ENSG00000087884	ENSG00000087884	EYNALVAQGVR	E9PNP3	11_77325222_A_G	rs11822592	1.5434917326098988e-07	1.8733296811108363e-10	7.0	5.0972814021548576e-14	-0.8487485867631448	1.4035449078769424e-21	-0.9985012077094928	7.183966385682801e-06	-0.7253645861380621	2.4254393527634504e-09	-0.6621676795239735	False	77325222,77245728,77245947,77250912,77253788,77254266,77257804,77276462,77280090,77281474,77281589,77281636,77282025,77282081,77282167,77282207,77282510,77283055,77283394,77283395,77283672,77283687,77283882,77284948,77284991,77285411,77288495,77289035,77289090,77289678,77290439,77290835,77291457,77292650,77292707,77292857,77294685,77295579,77296055,77296096,77296319,77298292,77298406,77298815,772…	11_77583266_G_A;	11_77607698_CAA_C;11_77590176_GAAAAAAAGATAAAAGAAATCCTCTATAACTAGGCAACTGCTAGGAATGAGGATGAAATGTGAAGTTAAAGAAATATCAAAATGGAAGCAGTAGGGAGAAATTTCTTCATCCGTCTACATTCCCTCCCCTTACCCTCACCAAACAAAACACTGAGCCTGCAGATGTGATGCTGTTCCATCACCTTCCCCTTGGGCTCACTGTGGCACAGAGCCAAAGCTGCTGAGGCAACTGGAGAGCAAGCTAAAAACCCTTCCAGGAAGATAATTGCTTCATGATCTGCTTTATGAACTGGGCTCAAATTCTTATGCAGGTGTGGATTTGGGCAGTTTCAGAAGGTGCATGTGGCTTATTCTGATACCCAGTTGGGC…			11_77626963_A_T;11_77610220_G_C;11_77608554_A_T;11_77608106_G_A;11_77608101_A_G;11_77607698_CAA_C;11_77607589_T_C;11_77604496_A_G;11_77604071_G_A;11_77603520_T_C;11_77603261_G_C;11_77600361_A_G;11_77599576_T_C;11_77597099_A_T;11_77595080_C_T;11_77593347_A_G;11_77590176_GAAAAAAAGATAAAAGAAATCCTCTATAACTAGGCAACTGCTAGGAATGAGGATGAAATGTGAAGTTAAAGAAATATCAAAATGGAAGCAGTAGGGAGAAATTTCTTCATCCGTCTACATTCCCTCCCC…	11_77610220_G_C;11_77608554_A_T;11_77608106_G_A;11_77608101_A_G;11_77607698_CAA_C;11_77607589_T_C;11_77604496_A_G;11_77604071_G_A;11_77603520_T_C;11_77603261_G_C;11_77600361_A_G;11_77599576_T_C;11_77597099_A_T;11_77595080_C_T;11_77593347_A_G;11_77590176_GAAAAAAAGATAAAAGAAATCCTCTATAACTAGGCAACTGCTAGGAATGAGGATGAAATGTGAAGTTAAAGAAATATCAAAATGGAAGCAGTAGGGAGAAATTTCTTCATCCGTCTACATTCCCTCCCCTTACCCTCACCAAACA…		0.11633663366336636	11	1	77532155	77629478
ENSG00000088205	ENSG00000088205	STVLTNGEAAMQSSNSESK	Q9NVP1	2_118575215_C_G	rs1052637	5.017708667083992e-09	7.851644162004018e-13	39.0	4.348310236058103e-18	-0.8788419889656076	0.5445022239358009	-0.05166273925988607	7.803437910678315e-11	-0.7156318296130001	0.6751095591448186	0.03591344337438352	False	118575215								0.3415841584158416	2	1	118572226	118589955
ENSG00000088756	ENSG00000088756	VHAPLLSK	Q9P2N2	18_6718467_G_A	rs13381520	0.07406913290886429	0.0009111292165886381	5.0	3.237993091608156e-05	-0.5063618758863575	0.0043560841537003455	-0.2975486143069703	9.208810410248928e-23	-0.7181994441960399	7.135747833784656e-27	-0.8186214295464861	False	6718467,6686951,6689374,6689385,6713257,6713314,6713490,6713505,6713515,6713579,6714404,6715863,6716098,6716795,6718031,6719009,6719078,6719503,6719945,6719946,6720203,6720798,6721388,6723061,6723126,6723231,6723282,6723728,6723883,6723980,6724373,6724710,6724894,6725074,6725274,6725397,6725698,6725839,6726177,6726843,6727176,6728467,6728488,6728678,6728751,6728903,6729022,6729046,6729314,6730016…		18_6746934_G_GCACTGTATA;18_6738607_TA_T;18_6736577_TA_T;18_6736577_T_TA;			18_6755698_C_G;18_6749032_G_A;18_6748161_A_T;18_6747728_A_T;18_6747553_A_G;18_6746934_G_GCACTGTATA;18_6746406_T_G;18_6745713_A_G;18_6740785_T_C;18_6740452_T_G;18_6739875_C_T;18_6738607_TA_T;18_6736577_TA_T;18_6736577_T_TA;18_6736125_A_G;18_6734128_C_G;18_6733011_A_C;18_6730719_A_C;18_6730716_A_C;18_6730187_G_A;18_6730016_G_C;			0.4678217821782178	18	1	6729717	6915715
ENSG00000088888	ENSG00000088888	GPVSPSVSFQPLAR	Q7Z434	20_3844929_C_T	rs45437096	0.00019823352020164388	2.3999722300208176e-07	17.0	1.3456815954827884e-13	-1.0839214995356086	0.013152889585066815	-0.2930561301968895	0.7764772797119583	-0.03670136603463503	0.3078404083358943	-0.0608928518060172	False	3844929	20_3844929_C_T;							0.12376237623762375	20	1	3827487	3849280
ENSG00000089063	ENSG00000089063	TNLATGIPSSK	Q96A57-2	20_5054553_C_G	rs443352	2.0215654259910465e-05	1.5239753719927713e-07	2.0	1.8432762594089798e-10	0.5268406084928456	4.73763714732139e-11	0.4758125992994177	1.81702996232436e-19	0.7974305198183754	1.8801063815140408e-18	0.7188331699905426	False	5054553,5044461,5050544,5064956,5067132,5072844,5073532,5073837,5074421,5075059,5076663,5076762,5078285,5081937,5082993					20_5082993_G_A;20_5081937_T_C;			0.3465346534653465	20	-1	5080486	5093749
ENSG00000089154	ENSG00000089154	DAVLYFSESLVPTAR	Q92616	12_120472418_A_G	rs72656925	0.04889863401298527	1.950406206891838e-05	129.0	3.418902977961405e-05	-0.5936401639091936	0.9681234225945152	-0.0072021607818246736	0.2393641842059467	-0.057421824147436414	0.6962996853034313	-0.027057892820034426	True	120472418,120541597								0.056930693069306926	12	-1	120565007	120632513
ENSG00000090686	ENSG00000090686	NIVQQQFCGEYAYVTVCNQCGR	A0A0A0MRS6	1_22307757_T_A	rs6691837	0.09289119382368882	0.00014843392145722528	42.0	1.1372658271985158e-08	1.4053973136963058	0.5914563306730718	0.232336976903877	0.6802444093212509	0.37552661058069536	0.10038989932983708	0.2625946659895092	False	22307757								0.04950495049504952	1	-1	22004791	22110099
ENSG00000090857	ENSG00000090857	AVDVLSELSYAPMTPDHFPSLFCK	Q8NCN5	16_70087637_G_C	rs56749289	5.5760134232329285e-11	6.6722668699688025e-15	28.0	8.217674203835184e-23	-1.4458266156641582	0.17262846919035152	-0.17270120759305566	0.11587299764787362	-0.31697163159134284	0.02024015790806731	-0.2572762126021587	False	70087637								0.1188118811881188	16	1	70147529	70195203
ENSG00000092094	ENSG00000092094	AMAHCGSQEALIVGGVGCNVR	Q9NPF4	14_20916249_T_C	rs2275008	0.009813208642449946	2.4424403465712444e-05	15.0	2.802813401279993e-09	-0.5994212478616714	2.1439075945793823e-10	-0.6155645661913209	2.2582791368150254e-20	-0.9117766987365424	2.598687512813084e-18	-0.6331095783379119	False	20916249,20909354,20909816,20911055,20913075,20914136,20914598,20916705					14_20916705_T_C;14_20916249_T_C;			0.2871287128712871	14	-1	20914570	20923264
ENSG00000093072	ENSG00000093072	FVETHPEFIGIK	A0A087X0I3	22_17691166_C_T	rs5747023	0.004046992580894418	0.00012687711573463413	1.0	2.189118879580721e-06	-1.099134629591228	1.1624088943342177e-08	-0.7326058025064109	7.611513388233236e-32	-1.1055411243653344	1.3580296665976174e-32	-1.1590189872215746	False	17691166,17690409,17691795,17691887,17692032,17692120,17692227,17692384,17692507					22_17692507_T_A;22_17692384_G_A;22_17692227_C_T;22_17692120_A_G;22_17692032_A_G;22_17691887_C_T;22_17691795_T_A;22_17691166_C_T;		22_17690409_G_A;	0.4975247524752475	22	-1	17660194	17702879
ENSG00000093144	ENSG00000093144	NTFSSGSDLNAVK	Q9NTX5	6_127748835_C_G		0.0003563947444502123	5.696321066359229e-07	14.0	1.771053810432093e-05	0.34898126298984433	5.864373196365392e-06	0.3296712074105201	0.004458616481238722	0.30994365761792914	5.140796120200158e-05	0.2700323740686409	False	127748835,127749656,127750679,127777039,127777516								0.3292079207920792	6	-1	127609855	127664754
ENSG00000095261	ENSG00000095261	IVENSDAVTEILNNAELLK	Q16401	9_123609204_T_C	rs12553812	0.0014960080577394875	1.60395263818904e-06	25.0	5.610304648708139e-10	-1.1375192051401264	3.5426987836635247e-09	-1.2148210838465832	4.642920606256587e-09	-1.20517726536499	2.712699844891065e-09	-1.1463665837311685	True	123609204								0.05198019801980198	9	-1	123577774	123605262
ENSG00000097046	ENSG00000097046	HLIPTSHPIR	O00311	1_91934394_A_G		0.09472344827258093	0.0004029270546303551	16.0	1.884342458892112e-06	-0.6848930117517673	0.0523150861243805	0.23798665488737505	0.9694552631639992	-0.08949569357029245	0.5640123095333053	0.06054975136466415	True	91934394								0.1831683168316832	1	1	91966408	91991321
ENSG00000099290	ENSG00000099290	TNPFPLLEDEDDLFTDQK	Q641Q2	10_51796379_C_T		0.000295094229658892	1.615479359446489e-07	40.0	1.6327279147506178e-11	-0.7703093195227506	0.6538707080757482	-0.02954086983835058	7.829039764126662e-26	-0.9444145176211556	1.1938550684918914e-11	-0.31034967704430205	True	51796379,51796962,51797239,51798031,51798336,51799321,51801386,51801793,51801913,51801925,51804949,51805807,51806275,51806645,51807210,51807214,51808564,51814612,51815364,51823059,51824424								0.400990099009901	10	1	51827648	51893269
ENSG00000100033	ENSG00000100033	HLVVPNAQTGQLEPLLSR	A0A087WWM6	22_18909505_T_C	rs5747932	0.002302446797194761	3.148699016659788e-06	21.0	1.586464484355466e-10	0.5693697507904311	3.801876223147008e-10	0.5754269450965376	8.994932462671653e-15	0.7684196823419397	8.48899153330968e-12	0.515144200081319	False	18909505,18909485					22_18909485_T_C;22_18909505_T_C;			0.3811881188118812	22	-1	18900294	18924066
ENSG00000100034	ENSG00000100034	LWEVAGQWQK	P49593	22_22272737_A_G	rs9610608	2.1524299522841587e-05	2.8331613587562216e-08	12.0	2.1563132402910904e-13	-1.3973113897729357	0.014983579949464929	-0.2991244896935048	0.9496288442777328	-0.27702044805578563	0.4847284267610582	-0.07524925476259749	False	22272737,22267303,22267534,22273058,22273249,22273534,22278029,22278764,22280767,22281182,22281243,22284117,22286791,22287414,22288011,22288560,22290670,22290936,22291020,22291472,22297961,22298347,22298478,22298664,22298752,22299622,22301254,22301508,22301515,22301673,22303521,22304943,22305021,22312568,22312668,22312790,22313669,22316160,22316448,22316478,22318031,22318538,22318671,22319388,223…	22_22288560_G_A;	22_22298478_AT_A;		22_22288560_G_A;	22_22305021_G_A;22_22304943_G_A;22_22303521_G_C;22_22301673_C_G;22_22301515_T_C;22_22301254_G_C;22_22299622_G_C;22_22298752_T_C;22_22298664_A_G;22_22298478_AT_A;22_22298347_T_G;22_22297961_C_T;22_22291472_T_C;22_22291020_G_A;22_22290936_C_T;22_22290670_C_A;22_22288011_G_A;22_22287414_T_C;22_22286791_A_G;22_22284117_G_A;22_22281243_C_T;22_22281182_C_T;22_22280767_A_G;22_22278764_C_T;22_22278029_C_…			0.0891089108910891	22	-1	22273793	22307209
ENSG00000100162	ENSG00000100162	HVDASFFLGK	B1AHQ6	22_42321251_A_G	rs7290134	0.051948517725974336	0.0004517082232165612	6.0	1.337081779061564e-07	0.6643589887492336	1.7792059449742975e-05	0.5460454306779439	4.576470272438528e-06	0.5427233326476735	1.2508176462482225e-05	0.2811552286187642	False	42321251,42315790,42322931,42324622,42330229,42331409,42334953,42335621,42337040,42338351,42339095,42339516,42340569,42340582,42340844,42341308,42343091	22_42341308_A_G;		22_42341308_A_G;	22_42343091_G_A;22_42334953_C_G;	22_42340844_T_C;22_42340582_T_C;22_42340569_C_T;22_42339516_A_G;22_42339095_T_C;22_42338351_G_A;22_42337040_T_G;22_42335621_G_A;		22_42341308_A_G;	0.22524752475247525	22	-1	42334725	42343168
ENSG00000100294	ENSG00000100294	SYSAVDVLQTLEHVDLDPQEPPR	Q8IVS2	22_43528793_T_C	rs737802	0.007501935835434285	1.671934365621198e-05	16.0	1.1229792112183297e-08	0.6035718247554507	2.2361613852803483e-11	0.5851638317807755	7.89458124187057e-11	0.4739885974208114	3.385239345660355e-17	0.5703310927536434	False	43528793,43520263,43522427,43523991,43524000,43524487,43526496,43526704,43528240,43528251,43529029,43529314,43529517,43533515,43540125	22_43529314_G_C;			22_43529314_G_C;22_43529029_C_T;22_43528251_G_T;22_43528240_G_A;22_43528793_T_C;	22_43533515_A_C;22_43529517_C_T;			0.297029702970297	22	-1	43528212	43539400
ENSG00000100300	ENSG00000100300	APPWVPAMGFTLAPSLGCFVGSR	B1AH87	22_43485385_T_G	rs6003048	0.08393698750885792	0.0017911646251541219	3.0	7.266909585254277e-06	0.8024474885024131	0.024343200500710573	0.22130184029538147	0.2435368772920684	0.20567443631376686	0.6958374389870641	0.023554347949899367	False	43485385,43474125,43478165,43479724,43480926,43484509,43485853,43487965,43489629,43493830,43494731								0.3663366336633663	22	1	43547520	43559248
ENSG00000100376	ENSG00000100376	DRDLLVVAHDLIR	Q9NWS6	22_45724727_G_A	rs6007592	2.521887141949256e-09	1.0699098038228266e-12	11.0	1.5930498237662682e-19	-0.9714362841921425	1.16256763519897e-16	-0.9028406465149376	7.125867163033627e-12	-0.9251516808382624	0.04984059128178076	-0.2526290466084099	False	45724727,45696695,45698149,45698221,45699780,45714937,45715608,45715624,45716397,45717524,45717859,45718041,45723116,45723320,45723807,45723842,45724513,45724999,45725106,45725276,45725392,45725524,45725600,45727565,45727688,45727778,45728163,45728370,45728632	22_45728370_G_A;22_45723807_G_C;	22_45728163_CCTT_C;22_45727778_CCCT_C;22_45724513_TA_T;		22_45725276_G_A;22_45725106_T_C;22_45724999_G_A;22_45724513_TA_T;22_45718041_A_G;22_45717524_C_T;22_45724727_G_A;	22_45728163_CCTT_C;22_45727778_CCCT_C;22_45727688_C_A;22_45727565_T_G;22_45725600_A_G;22_45725524_C_T;22_45725392_T_C;22_45725276_G_A;22_45725106_T_C;22_45724999_G_A;22_45724513_TA_T;22_45723320_C_A;22_45723116_A_G;22_45718041_A_G;22_45717859_C_T;22_45717524_C_T;22_45716397_A_G;22_45715624_A_G;22_45715608_C_T;22_45714937_T_C;22_45724727_G_A;		22_45723842_G_A;	0.2648514851485149	22	1	45704849	45737836
ENSG00000100413	ENSG00000100413	LEDAYVFPGDGASHTK	Q9Y535	22_41811620_T_C	rs202659	0.031067156633798467	0.0003643151071092797	4.0	8.501079528861736e-06	0.4670677680476461	0.018390633900016568	0.22659842882185546	2.023270189294057e-07	0.4573032350950814	2.3611282030615488e-20	0.552999236743808	False	41811620,41719469,41722864,41726053,41726803,41727031,41728620,41729216,41729294,41732389,41733895,41736267,41741042,41741544,41742788,41746212,41762523,41767486,41769754,41769770,41782119,41782423,41782435,41782633,41783659,41784562,41784867,41785287,41785516,41785735,41785812,41786227,41786788,41787335,41787676,41789408,41791045,41791200,41793090,41797547,41797758,41798520,41798896,41799106,417…		22_41922189_GCCTGCCTCTGGAGGGCTTGTCATCCACCCCTCCAGGGCCATGCCCTGACCTCTGTCCTCTCTACTTACCACCCAAGGTCAAAGGGAAGTGTACCACTGACCACATCTCAGCTGCTGGCCCCTGGCTCAAGTTCCGTGGGCACTTGGATAACATCTCCAACAACCTGCTCATTGGTGCCATCAACATTGAAAACGGCAAGGCCAACTCCGTGCGCAATGCCGTCACTCAGGAGTTTGGCCCCGTCCCTGACACTGCCCGCTACTACAAGGTGGGTCAGAGTTGATAGGGGCAATGCCAGTGGTCACTCCTGAAGGGGCCTGCAAGGCAGGTGCAGGGAGGACATTAGGGGAGTGGAAACTGGGAAGGAGGCCGACCAAGCCCAAAGG…	22_41922189_GCCTGCCTCTGGAGGGCTTGTCATCCACCCCTCCAGGGCCATGCCCTGACCTCTGTCCTCTCTACTTACCACCCAAGGTCAAAGGGAAGTGTACCACTGACCACATCTCAGCTGCTGGCCCCTGGCTCAAGTTCCGTGGGCACTTGGATAACATCTCCAACAACCTGCTCATTGGTGCCATCAACATTGAAAACGGCAAGGCCAACTCCGTGCGCAATGCCGTCACTCAGGAGTTTGGCCCCGTCCCTGACACTGCCCGCTACTACAAGGTGGGTCAGAGTTGATAGGGGCAATGCCAGTGGTCACTCCTGAAGGGGCCTGCAAGGCAGGTGCAGGGAGGACATTAGGGGAGTGGAAACTGGGAAGGAGGCCGACCAAGCCCAAAGG…	22_41940524_A_G;22_41922189_GCCTGCCTCTGGAGGGCTTGTCATCCACCCCTCCAGGGCCATGCCCTGACCTCTGTCCTCTCTACTTACCACCCAAGGTCAAAGGGAAGTGTACCACTGACCACATCTCAGCTGCTGGCCCCTGGCTCAAGTTCCGTGGGCACTTGGATAACATCTCCAACAACCTGCTCATTGGTGCCATCAACATTGAAAACGGCAAGGCCAACTCCGTGCGCAATGCCGTCACTCAGGAGTTTGGCCCCGTCCCTGACACTGCCCGCTACTACAAGGTGGGTCAGAGTTGATAGGGGCAATGCCAGTGGTCACTCCTGAAGGGGCCTGCAAGGCAGGTGCAGGGAGGACATTAGGGGAGTGGAAACTGGGAAGGAGGC…	22_41939739_A_G;22_41938536_A_G;22_41936019_A_G;22_41935912_G_A;22_41935362_A_G;22_41935285_A_G;22_41934961_G_C;22_41934573_C_T;22_41933837_G_A;22_41932774_A_G;22_41932323_C_T;22_41931074_A_G;22_41931010_T_C;22_41929960_T_G;22_41928371_T_G;22_41928320_G_C;22_41927820_G_A;22_41927700_C_T;22_41925535_T_C;22_41922189_GCCTGCCTCTGGAGGGCTTGTCATCCACCCCTCCAGGGCCATGCCCTGACCTCTGTCCTCTCTACTTACCACCCAAGGTCAAA…	22_41939739_A_G;22_41938536_A_G;22_41936019_A_G;22_41935912_G_A;22_41935362_A_G;22_41935285_A_G;22_41934961_G_C;22_41934573_C_T;22_41933837_G_A;22_41932774_A_G;22_41932323_C_T;22_41931074_A_G;22_41931010_T_C;22_41929960_T_G;22_41928371_T_G;22_41928320_G_C;22_41927820_G_A;22_41927700_C_T;22_41925535_T_C;22_41922189_GCCTGCCTCTGGAGGGCTTGTCATCCACCCCTCCAGGGCCATGCCCTGACCTCTGTCCTCTCTACTTACCACCCAAGGTCAAA…		0.2995049504950495	22	-1	41921808	41940610
ENSG00000100417	ENSG00000100417	IDPEVAAFLQK	Q92871	22_41877989_A_G	rs169361	0.00027512208807949236	7.489562646653645e-07	8.0	1.2641754087171095e-11	0.6257189632812015	0.0023240151630725	0.3110459932294831	7.43975307931248e-14	0.7062075229705473	2.9776119571817277e-16	0.6699092473868918	False	41877989,41768625,41775880,41776646,41777241,41777315,41777558,41777883,41777913,41779073,41779971,41782119,41782423,41782435,41782633,41783659,41784562,41784867,41785287,41785516,41785735,41785812,41786227,41786788,41787676,41789408,41791045,41791200,41793090,41797547,41797758,41798520,41798896,41799106,41799767,41799833,41800678,41801268,41801299,41801461,41801795,41802031,41803279,41803635,418…					22_41979668_G_C;22_41976939_T_C;			0.2747524752475248	22	-1	41972898	41985894
ENSG00000100439	ENSG00000100439	YVSLPNQNK	Q8TB40	14_23067931_C_T	rs8011143	2.715037010243816e-05	3.681993472469775e-08	12.0	1.1740355286708588e-14	0.7325664539984948	3.5046570611654434e-06	0.5064066691827289	5.482152682418314e-37	1.195732491276033	1.6767719890483873e-39	1.1017524156623788	False	23067931					14_23067931_C_T;	14_23067931_C_T;		0.3094059405940594	14	1	23067146	23081265
ENSG00000100445	ENSG00000100445	LETTQLLAK	Q9NRG7-2	14_24920473_T_C	rs11158711	5.04360226310034e-05	1.0192753167554168e-07	9.0	4.261378585346324e-12	1.0160841869384851	1.547725077665664e-05	0.6307271563518264	2.4772897624321742e-26	1.4363120536080392	2.2236471469390748e-12	0.7202749742719871	False	24920473								0.09653465346534654	14	-1	24908972	24912111
ENSG00000100577	ENSG00000100577	TVPINLIK	O43708	14_77800815_C_T	rs11624726	4.7258288411916074e-11	2.5447205678308287e-14	6.0	1.2529835833243134e-18	1.17760481753102	7.290965919098802e-18	1.1650356923094842	7.118943165877948e-05	0.34664726492287684	1.0659502139073448e-14	0.5278488954824133	False	77800815,77790416,77790872,77791519,77795638,77798634,77809319,77821608,77825746,77828047,77828257,77829210,77832883,77834620					14_77795638_G_A;14_77791519_A_G;14_77790872_T_A;14_77790416_G_A;	14_77795638_G_A;		0.33663366336633666	14	1	77787227	77797940
ENSG00000100596	ENSG00000100596	HEELEELVAR	O15270	14_77724226_G_A	rs3813539	0.0795464830040044	0.0002008986701924241	25.0	1.3777721634259385e-05	1.1466784969239066	0.0934038437581935	0.182033660348814	5.928315150317607	-0.0007254354910087228	0.54658300310594	-0.036829654372657256	True	77724226								0.14356435643564355	14	-1	77972340	78083116
ENSG00000100983	ENSG00000100983	ASYILMEK	P48637	20_33488013_G_A	rs2207147	2.425651366351661e-07	1.0919073143232148e-10	21.0	1.5652947156573723e-11	0.4982832716014434	2.9818136186064906e-18	0.5618796077941851	2.6712310155762017e-22	0.9725196838493552	1.8549457139328726e-23	0.7470104962895504	False	33488013,33278255,33278442,33281562,33281604,33281651,33281736,33289147,33320055,33346047,33374402,33386430,33401059,33401707,33402231,33402829,33405227,33405263,33405664,33406339,33407715,33408137,33408921,33411425,33413176,33413809,33415820,33416536,33416663,33418616,33418740,33419977,33422614,33424151,33424908,33426981,33429684,33429907,33435874,33446974,33448496,33450041,33459127,33460810,334…		20_33533736_AA_A;			20_33540529_A_G;20_33538521_A_G;20_33533736_A_C;20_33533736_AA_A;20_33527838_A_G;20_33526983_T_C;20_33523840_A_C;20_33522869_T_C;20_33522142_T_C;20_33522054_T_C;20_33520802_C_A;20_33520321_T_C;20_33518353_C_T;20_33517014_A_G;			0.349009900990099	20	-1	33516236	33543620
ENSG00000100994	ENSG00000100994	QEYFVVAATLQDIIR	P11216	20_25257215_G_A	rs2254046	0.07081565068628554	9.75977423188752e-05	43.0	7.03160743324864e-08	-0.6950621266041084	0.9847707202118872	-0.0019918881657567944	0.0012317715632609721	0.0395545831395763	3.651433945633604e-05	0.3772578133103979	False	25257215,25246652,25252161,25257260,25259006,25262769,25267622,25268661,25270999,25271033,25272547,25276108,25280388,25282287,25282608,25326132,25336119,25338445,25339324,25341317,25349120,25359150,25368785,25378907,25385052,25388186,25392918,25404391,25405469,25425808,25430843,25432152,25434351,25436283,25436633,25439389,25440038,25444279,25446043,25450100,25452150,25456230,25463148,25469844,255…	20_25262769_G_A;20_25259006_G_T;	20_25272547_AGAAAGCGCAGG_A;			20_25276108_G_A;20_25272547_AGAAAGCGCAGG_A;20_25271033_C_G;20_25270999_C_T;20_25268661_C_T;20_25267622_C_T;20_25257260_G_C;20_25252161_C_T;20_25246652_A_T;20_25257215_G_A;			0.16336633663366334	20	1	25228705	25278650
ENSG00000101000	ENSG00000101000	LHMLQISYFR	Q9UNN8	20_33756830_A_C	rs2378335	0.0009752060112607543	2.497236884166584e-05	1.0	2.2642785863707187e-09	-0.5961762066001906	1.883307638260117e-09	-0.6087276311424672	3.9898149274301286e-14	-0.5492981205311326	3.0718161760542165e-14	-0.4957377183794415	False	33756830								0.4108910891089109	20	1	33759876	33765165
ENSG00000101017	ENSG00000101017	SCSPGFGVK	P25942	20_44740196_C_T	rs6074022	9.037760002242287e-09	1.4329343069248571e-11	4.0	2.332000044998811e-15	0.8977604710983662	9.642920140159286e-10	0.7337985918541385	6.1249982608611325e-06	0.5775653495386489	1.823338644732748e-07	0.535813847251517	False	44740196,44730245,44732089,44734310,44735263,44735854,44736371,44739419,44742064,44746982,44747947,44749251				20_44746982_T_C;	20_44749251_T_C;20_44747947_T_G;	20_44749251_T_C;20_44747947_T_G;		0.2549504950495049	20	1	44746911	44758502
ENSG00000101751	ENSG00000101751	ITFPSDIDPQVFYELPEAVQK	Q9UNA4	18_51830294_C_T	rs12955457	2.3087361127999624e-07	1.2188106375071068e-10	17.0	8.823110266526804e-15	-0.5340778665401462	3.1045635762508246e-17	-0.6266753051566871	1.0200289540985376e-12	-0.5750858985148777	5.6951904548644756e-30	-0.6963050701957428	False	51830294,51781019,51781894,51782775,51784064,51787992,51790593,51793968,51795847,51798047,51799343,51801731,51802708,51802787,51808116,51813966,51815283,51817587,51825773,51829629,51832407,51845450,51846989,51856027,51856987,51864456,51866513,51871051,51871213,51872416,51880841,51881380,51882319		18_51808116_CT_C;18_51801731_CAT_C;		18_51795847_G_T;	18_51846989_G_A;18_51845450_T_A;18_51832407_C_T;18_51829629_C_T;18_51825773_C_G;18_51817587_T_A;18_51815283_A_G;18_51813966_T_A;18_51808116_CT_C;18_51802787_T_C;18_51802708_C_A;18_51801731_CAT_C;18_51799343_G_A;18_51798047_C_G;18_51830294_C_T;	18_51817587_T_A;18_51815283_A_G;18_51813966_T_A;		0.4282178217821782	18	1	51795774	51847636
ENSG00000102547	ENSG00000102547	LIEFLSSFQK	Q9H9S4	13_50005780_C_T	rs1853324	0.01978403137597281	0.00020596036014235183	4.0	1.7772678978357738e-06	-0.4478705510782577	0.0002687915398968611	-0.34322627888650903	1.0212953753923198e-08	-0.4413185313986746	3.1590936515550736e-11	-0.4923559189122622	False	50005780,50002976,50006884,50007393,50008112,50008301,50009798,50009874,50012370,50013622,50015428,50022089,50024871,50025495,50027270,50028499,50029475,50029976,50031536,50031610,50035042,50035048,50037307,50038840,50039251,50040593,50041534,50043820,50044675,50044710,50044755,50047529,50049150,50050620,50053063,50054308,50054346,50055973,50057097,50057996,50058558,50058666,50058867,50059354,500…		13_50002976_A_AAATA;13_50005778_GGC_G;		13_50008301_A_G;	13_50015428_C_A;13_50013622_A_C;13_50012370_A_G;13_50009874_C_T;13_50009798_A_G;13_50008112_G_A;13_50007393_C_T;13_50006884_G_A;13_50002976_A_AAATA;13_50002976_A_T;13_50005780_C_T;13_50005778_GGC_G;			0.3217821782178218	13	-1	49882786	50018262
ENSG00000102699	ENSG00000102699	YIFPLDDK	Q9UKK3	13_24984687_A_T	rs3978791	0.07366129750870541	0.0002644986451218313	17.0	1.5621237866619354e-08	1.3011531781359835	0.040811617455847334	0.2002202770329753	4.6688916753158415e-06	0.4510864536382717	3.462076428797749e-07	0.531597078785046	False	24984687,24975113,24975771,24975891,24975898,24976109,24976355,24976414,24977234,24977294,24977901,24978310,24979890,24980675,24980949,24981850,24982832,24983079,24983323,24983385,24983499,24983513,24983866,24983868,24983904,24984164,24984466,24984479,24984515,24984540,24984541,24984808,24984945,24985077,24985177,24985425,24985439,24985503,24985512,24985669,24985791,24985906,24986813,24987041,249…	13_25009485_C_G;13_25009441_C_A;13_25009297_G_T;13_25000617_C_G;	13_25017678_C_CCA;13_25015497_AG_A;13_25014880_CTG_C;13_25014535_CA_C;13_25013632_TA_T;13_25011731_CT_C;13_25011571_CAT_C;13_25010832_TTAC_T;13_25010064_AAAAAAAAAAAG_A;13_25006334_CAT_C;13_25004491_TTAAA_T;13_25003150_AT_A;13_25000501_A_ATAAAG;13_24998976_ATTT_A;			13_25020633_A_G;13_25019096_T_C;13_25018975_A_G;13_25018964_C_T;13_25018680_C_T;13_25018320_A_G;13_25017682_T_C;13_25017678_C_CCA;13_25017591_C_T;13_25017590_T_C;13_25017451_A_G;13_25017285_T_C;13_25017230_A_G;13_25017171_A_G;13_25016142_T_C;13_25015497_AG_A;13_25015248_T_C;13_25015202_G_T;13_25015197_G_A;13_25015104_A_G;13_25015053_A_C;13_25014988_A_C;13_25014880_CTG_C;13_25014801_A_G;13_2501453…		13_25016092_C_T;	0.35396039603960394	13	-1	24995064	25086948
ENSG00000102738	ENSG00000102738	EAPETDTSPSLWDVEFAK	Q92665	13_41261019_C_T	rs9532584	6.568539182107726e-10	1.7684830872014342e-13	16.0	8.68338735957512e-26	-1.2509125361109208	0.0029656104001335964	-0.3084323406793845	1.2236199973946869	-0.030342047731317687	0.4577103149671316	0.061548624749133786	True	41261019,41248026,41276833,41278409,41279214,41287942,41291706,41295887,41297404,41297405,41302147,41302694,41309223,41315998,41317936,41318822,41323397,41327301,41330171,41331497,41334327,41341419,41345451,41372960,41397482,41401404	13_41323397_C_G;				13_41341419_G_A;13_41334327_G_A;13_41331497_T_C;13_41330171_T_G;13_41327301_C_T;13_41318822_G_A;13_41317936_C_T;13_41315998_T_G;13_41309223_G_A;			0.1905940594059406	13	-1	41303432	41345309
ENSG00000102763	ENSG00000102763	DFLLGEHLLLVGNQGVGK	A3KMH1-3	13_42440496_T_A	rs9532939	8.327612640357312e-10	5.267127090945497e-14	70.0	1.268397826430814e-20	-1.05015529829227	1.0631991388802642e-17	-0.8465898515061543	0.09808603509150253	-0.15458219603375606	0.021868962727846903	-0.16333300753374694	False	42440496		13_42440495_AT_A;			13_42440496_T_A;13_42440495_AT_A;			0.4034653465346535	13	-1	42140973	42535256
ENSG00000102882	ENSG00000102882	GQPFDVGPR	P27361	16_30134656_T_C	rs28529403	3.7115003236014025e-07	3.3510777775726e-10	11.0	6.315387137956043e-17	0.6614545816631654	1.0585151924478328e-15	0.6184422539171615	9.068214422365492e-29	0.9334288232809904	2.033793481011917e-37	0.9920895452126598	True	30134656,30125840,30141985,30142021,30144379,30145785,30147265				16_30125840_G_C;	16_30134656_T_C;	16_30125840_G_C;		0.400990099009901	16	-1	30125426	30134827
ENSG00000103035	ENSG00000103035	IVGWYHTGPK	H3BQV2	16_74516796_T_C	rs75124206	0.03643280421801312	0.00013749366932728325	13.0	2.219193251151704e-10	-1.2258662793737147	0.9279130512293448	-0.11582921729228968	1.442222370953837	-0.08254974342257287	0.05028248941803806	0.19674996764668512	False	74516796								0.04455445544554455	16	1	74330673	74340186
ENSG00000103248	ENSG00000103248	DVTLQGEHQHLPEPGCQQTVPLSVGR	Q2M296-2	16_86568824_A_G	rs4843390	0.0014043428234041429	1.2323218904268336e-05	3.0	1.009556770315111e-09	0.9251176836268216	0.00010420131019089646	0.6033519186328794	2.0923433260988325e-07	0.7678415799380554	1.6703970156015712e-09	0.618541006134956	False	86568824,86568805,86568811					16_86568811_A_G;16_86568805_A_G;16_86568824_A_G;	16_86568811_A_G;16_86568805_A_G;16_86568824_A_G;		0.15841584158415842	16	-1	86563782	86588841
ENSG00000103266	ENSG00000103266	VGHFDPVTR	Q9UNE7	16_981959_A_G	rs73499257	0.023447515458904337	4.686904039902458e-05	22.0	7.391884140361253e-07	-0.6978837866789915	0.007593187134657483	-0.3549924725352964	0.33628130663341177	-0.3286360270763505	0.2885792540113339	-0.08273551830571653	True	981959,951388,969885,970803,971343,971383,972084,972456,973204,974376,977494,977862,978772,979639,982502,982572,983295,984003,984444,984811,985373,988222,989564,989600,990115,990631,991294,991367,993101,993288,993871,994230,994716,995783,997174,998454,1002469,1004080,1004757,1004873,1005605,1008430,1009363,1009709,1010318,1012258,1013624,1014070,1016475,1017982,1017983,1018034,1018189,1018938,101…								0.11633663366336636	16	1	730224	732870
ENSG00000103356	ENSG00000103356	LELYAQATEALLK	Q5JPH6	16_23466109_A_G	rs659845	0.06483972105127284	0.00016681273215296948	22.0	3.90076864435564e-07	-0.7580963071382611	7.900035831308495e-05	-0.4744281903409577	8.278035800861659e-10	-0.5481246938474694	1.162569429477248e-13	-0.6386989510140575	False	23466109,23397113,23400054,23403031,23403510,23410333,23410419,23411837,23412104,23412310,23413666,23413774,23415898,23420943,23422672,23425585,23427110,23429687,23434298,23434512,23436358,23439997,23440611,23440704,23440961,23443260,23449331,23450051,23452824,23453090,23454354,23456578,23457583,23458261,23458485,23461754,23462055,23466035,23466969,23467181,23470639,23474664,23485353,23486197,234…		16_23549417_TA_T;16_23538293_T_TA;16_23535307_CTCTGT_C;16_23535305_ATC_A;	16_23541223_G_A;	16_23563501_C_T;16_23535307_CTCTGT_C;16_23535305_ATC_A;	16_23565212_A_G;16_23560771_C_A;16_23560398_G_A;16_23557790_T_C;16_23556909_G_A;16_23556561_C_T;16_23555726_C_T;16_23550931_C_T;16_23549417_TA_T;16_23548801_G_A;16_23542668_G_A;16_23541223_G_A;16_23540798_C_T;16_23540237_T_C;16_23538293_T_TA;16_23538293_T_A;16_23537772_A_G;16_23537280_T_C;	16_23565212_A_G;16_23563501_C_T;16_23560771_C_A;16_23560398_G_A;16_23557790_T_C;16_23556909_G_A;16_23556561_C_T;16_23555726_C_T;16_23550931_C_T;16_23549417_TA_T;16_23548801_G_A;	16_23563501_C_T;	0.16831683168316833	16	-1	23533335	23569052
ENSG00000103415	ENSG00000103415	MADLSELLK	P30519	16_4505331_C_T	rs1861652	0.024636258031264784	6.52023525171259e-05	17.0	2.9444022107668084e-08	-0.4952415528343366	5.1612568665366616e-08	-0.4873769998900444	1.1665990553223907e-05	-0.4776935768622236	6.085647187131332e-15	-0.4583517611727365	False	4505331,4500544,4501655,4502410,4502514,4503631,4506232,4507678,4508606,4509825,4510426,4514655,4515145,4516092,4518205,4518392,4518458,4518558,4518754,4518948,4519140,4522367,4524060,4525265,4526292,4527109,4528634,4529001,4529613,4530597,4530862,4530919,4534366,4535307,4535557,4536621,4536934,4537670,4537693,4537893,4538114,4538989,4539030,4541390,4541924,4544505,4549226,4560627,4560929,4562351…				16_4526292_A_G;	16_4549226_C_A;16_4544505_C_T;16_4541924_T_C;16_4541390_C_G;16_4539030_T_A;16_4538989_G_A;16_4538114_G_A;16_4537893_G_A;16_4537693_T_C;16_4537670_T_C;16_4536934_T_A;16_4536621_T_C;16_4535557_C_T;16_4535307_T_A;16_4534366_G_C;16_4530919_C_T;16_4530862_T_C;16_4530597_T_C;16_4529613_A_G;16_4529001_C_A;16_4528634_T_C;16_4527109_T_C;16_4526292_A_G;16_4525265_C_T;			0.2896039603960396	16	1	4524691	4560348
ENSG00000103550	ENSG00000103550	YSVLNNDDYFADVSPLR	Q1ED39	16_19726275_C_T	rs11640454	2.425651366351661e-07	9.501982477290352e-11	24.0	7.359036502503513e-21	-1.2489356461291403	0.22820692176178284	-0.10761387351563644	1.549451377518457e-07	-0.6090038010127551	0.0054216249491217715	-0.2421989256396348	False	19726275,19789932,19802123	16_19726275_C_T;							0.2103960396039604	16	-1	19714902	19729557
ENSG00000103647	ENSG00000103647	YYEISTEK	Q9UQ03-2	15_68940338_C_G	rs7162636	0.03953360202679879	0.00021813309987796649	9.0	2.278400356565983e-05	1.0885952314339482	0.6392421409844127	0.043174294412446745	0.9461267108071668	0.10751900520228796	0.4952771351955507	0.06462385852801089	False	68940338,68940669		15_68940669_TA_T;			15_68940669_TA_T;15_68940338_C_G;			0.31683168316831684	15	1	68871308	69020145
ENSG00000103657	ENSG00000103657	NLGFYTDQAFGELEK	Q15751	15_64205552_T_C	rs11854930	0.06232955905494213	6.771025779125683e-05	51.0	4.644996319707471e-07	-0.7900367316708595	0.2597189185623681	-0.1518974077419887	0.8942100866734995	-0.08779440103335955	0.7566237363925739	0.01970750412300133	True	64205552,64214993,64219515								0.10396039603960396	15	-1	63900817	64126141
ENSG00000103811	ENSG00000103811	VNHAVLAVGYGEK	A0A087X0D5	15_79234957_G_A	rs34593439	6.030538164596631e-07	8.762470195912983e-10	7.0	1.9486958432314185e-17	-1.0006973852232859	1.7263979932939802e-18	-1.070237686947503	8.200020445921858e-07	-0.6158457260056491	4.975358618170654e-09	-0.5980668542609424	False	79234957					15_79234957_G_A;			0.11386138613861388	15	-1	79213400	79241916
ENSG00000103932	ENSG00000103932	GPSVGEVVPNVGPPEGAVTCETPTPR	Q9BWH6	15_41783388_T_C	rs115718693	3.7971162496937395e-09	5.920494839631115e-13	33.0	3.4392944826861747e-19	-1.7070177120062653	0.002023175621040469	-0.5240397972422967	0.9921987608698436	-0.16714772216716756	0.8452208619793264	0.02433226244332937	True	41783388								0.07673267326732673	15	-1	41809374	41836467
ENSG00000104047	ENSG00000104047	LLAPEFVNIYTYPCIPEYEEK	Q8N5C7	15_49952940_A_G	rs8033476	0.036756807637728	0.0003012853085059672	6.0	1.1880142248025768e-07	-0.40556944004292417	6.639094139112646e-05	-0.3257771499830233	4.2164514925730004e-19	-0.4792699890147536	1.13124843555582e-08	-0.4798892357319524	False	49952940,49800789,49802271,49811991,49851285,49857898,49863828,49892156,49923026,49926216,49948634,49952570,49968752					15_49926216_C_T;15_49923026_C_G;	15_49926216_C_T;15_49923026_C_G;		0.38613861386138615	15	1	49913177	49937333
ENSG00000104219	ENSG00000104219	ESQSHLLTDSQSWTESSINPGK	Q9UIJ5	8_16802224_G_A	rs77507704	0.08486240394469602	0.0054733559562272546	1.0	0.003107757185018086	0.7835850022058923	0.8911973618367081	0.02064302198969004	0.6885037740071062	0.0968567089644708	0.2062518340625278	0.0983480411202202	False	16802224								0.2351485148514852	8	1	17013538	17082308
ENSG00000104327	ENSG00000104327	AGLELSPEMK	P05937	8_91282507_T_G	rs12549515	0.005916689927604882	1.4665550513730286e-05	14.0	1.7345924082271392e-09	-0.8635863599193264	5.783479437859482e-06	-0.6024828881260598	0.0010515792114475157	-0.4804899284306306	0.0003141684265529591	-0.4122937324595826	False	91282507,91200676,91203605,91204958,91207269,91216171,91216273,91216813,91216945,91217447,91218396,91219935,91221107,91223229,91224155,91226155,91227085,91228778,91229131,91229254,91231079,91231655,91231753,91232520,91234381,91242179,91243184,91245106,91245185,91252939,91255093,91258524,91258669,91259303,91261083,91261287,91271495,91278484,91279413,91283363,91286208,91286602,91286655,91288667,912…								0.08168316831683169	8	-1	91070836	91107703
ENSG00000104518	ENSG00000104518	TFQPPATGHK	G3V1A6	8_144646352_C_T	rs13276307	5.620610014627256e-05	8.122493094655602e-08	13.0	5.2982510188127343e-11	0.7430920076951235	5.849724887271353e-15	0.7466726524572351	1.94653407449512e-20	0.7985719153083767	1.163097639889086e-15	0.6057942974754178	False	144646352,144643169,144649650			8_144643169_C_G;		8_144643169_C_G;			0.2797029702970297	8	1	144635377	144645232
ENSG00000104774	ENSG00000104774	LVNAQQAK	O00754	19_12772090_C_T	rs1133330	1.4809745354264186e-18	2.835418519423561e-23	25.0	8.189291410074155e-25	-1.1976011152564627	0.5581261461479494	0.043475389815570864	0.00010115610731191984	-0.13011556057403514	1.6245483298053546e-05	0.33382325883797465	False	12772090,12741423,12741885,12758723,12768843,12770626,12771220,12771823,12772165,12772263,12773751	19_12772165_G_A;19_12772090_C_T;	19_12773751_C_CA;19_12770626_CT_C;			19_12773751_C_CA;19_12772263_T_C;19_12771823_A_G;19_12771220_A_G;19_12770626_CT_C;19_12768843_G_T;19_12758723_A_G;			0.4084158415841584	19	-1	12757325	12777556
ENSG00000104805	ENSG00000104805	ELDFVSHHVR	Q02818	19_49435715_A_G	rs6509409	2.1063242781965045e-05	1.3207059013700711e-08	25.0	1.6673594446583773e-15	1.6803743435949745	0.05523257078556505	0.30596464187043937	0.03788647810979274	0.291128374134058	0.09692701517380076	-0.2791759001162479	False	49435715								0.06435643564356436	19	1	49403307	49426629
ENSG00000104859	ENSG00000104859	QATTYGMADGDFVR	F5H0Q6	19_45594170_A_G	rs3178166	0.011905706700340076	9.117688510491382e-05	5.0	0.0015651781966480446	0.6699093355594776	0.004676603630777539	0.24304871230477296	0.5518991908573624	0.12650763811389046	0.7285164441263017	0.014596335946467944	False	45594170								0.4876237623762376	19	1	45542298	45574214
ENSG00000104884	ENSG00000104884	RIEQIAQQL	P18074	19_45854919_T_G	rs13181	5.5599999335169237e-05	5.4625494519478795e-08	19.0	1.0115805410766029e-12	-1.1644193427249272	0.002723481514453392	-0.2684725020236327	5.737059308058178e-11	-0.4646164998222318	1.804440305416456e-14	-0.488389850512481	True	45854919,45847556,45848610,45849690,45849751,45849909,45853094,45854503,45855060,45855262,45855524	19_45854919_T_G;	19_45854503_CCCTCAC_C;19_45854503_CCCTCA_C;		19_45854503_CCCTCAC_C;19_45854503_CCCTCA_C;	19_45855262_G_T;19_45855060_C_G;		19_45855524_G_A;	0.3688118811881188	19	-1	45853095	45874176
ENSG00000104979	ENSG00000104979	GAAAATSSK	Q9UNZ5	19_14120694_G_A	rs12974919	0.04470184393374979	0.0004546675522757847	5.0	5.089074940125766e-07	-1.6459553753392495	0.3494401699415187	-0.21026608107506176	0.8235750302994325	-0.24577895412360004	0.3666796945019284	-0.08697930688378544	False	14120694,14119921								0.06683168316831684	19	1	13884982	13889276
ENSG00000105185	ENSG00000105185	VSEQGLIEILK	O14737	19_33000776_G_A	rs10048434	0.02933138467741175	0.0001506833262735512	9.0	0.00020749013963190883	-0.2163023590550468	0.01015693782889278	-0.20131225192622004	0.2860743537648797	-0.14022033204625142	0.4993607100139264	-0.03477986469315757	False	33000776,33001746,33007981,33008031,33008514,33008516								0.22524752475247525	19	1	33071974	33078358
ENSG00000105197	ENSG00000105197	LQPYNGVALRPWDGNSDDR	Q3ZCQ8-2	19_39738578_G_A	rs117648444	0.07266220322123489	0.00039758817562066806	11.0	1.750691929470464e-07	-0.8916227477128441	0.0786890497235715	-0.24232775002258355	0.6849066937859474	-0.3373951180223086	0.5837735872181499	-0.04134605544476359	True	39738578,39736658,39740463,39742442,39744696								0.09158415841584157	19	1	39971052	39984422
ENSG00000105409	ENSG00000105409	RDVAGDASESALLK	P13637-2	19_42368629_G_A	rs12974044	0.06859179744935764	0.0002493090639612586	16.0	1.1976503262540042e-06	0.6448588870007146	0.00014139978745834038	0.3570583017140687	4.385522994868781e-06	0.3568795969500537	0.0005819012550080997	0.2560501387078488	False	42368629,42360735,42366232,42373893								0.33910891089108913	19	-1	42470734	42501649
ENSG00000105552	ENSG00000105552	DWVPDAAGTSLYVRPVLIGNEPSLGVSQPTR	O15382	19_49306276_A_G	rs62125920	0.002355701368015627	4.528930076117954e-06	15.0	3.810015333472815e-09	-0.7644775687990268	0.0346905724414421	-0.2316615502653856	0.587643344063117	-0.16037061931146193	0.6336816844625792	0.028422073317618507	False	49306276,49301882,49301887,49302286,49302323,49303070,49303740,49303827,49304059,49304660,49307315,49307939,49313000,49314782,49317710,49317785,49319004,49321911,49325017,49325859,49326464,49329285	19_49303070_G_C;	19_49301882_CCTTT_C;			19_49313000_T_C;19_49307939_G_A;19_49307315_A_G;19_49304660_T_G;19_49304059_T_C;19_49303827_G_A;19_49303740_G_A;19_49302323_T_C;19_49302286_A_G;19_49301882_CCTTT_C;19_49306276_A_G;			0.2277227722772277	19	-1	49298319	49314286
ENSG00000105607	ENSG00000105607	EIISEMGELGVLGPTIK	Q92947	19_13010520_A_G	rs8012	0.005656448679504585	1.46304072950432e-05	13.0	9.647777288679426e-09	0.5386262687454522	1.92905306147458e-10	0.6345807976124764	3.819920831601396e-13	0.6012697380517302	1.801913060427304e-12	0.4838981040362179	False	13010520,13014314,13071082				19_13010520_A_G;	19_13014314_T_C;19_13010520_A_G;	19_13010520_A_G;		0.3985148514851485	19	1	13001840	13025021
ENSG00000105669	ENSG00000105669	ALHQGDSLECTAMTVQILLK	O14579	19_19017862_G_A	rs10330	0.030533591184962725	8.403405495442655e-05	17.0	3.9991463777651494e-07	-0.6344083838052315	0.03944365737952872	-0.29091647183626845	2.691375230820234e-17	-1.1655689434247782	0.00034181460656087696	0.23511959168928875	False	19017862,19003209,19003219,19003251,19007599,19007801,19009825,19010933,19011865,19012358,19014248,19016785,19018614,19019800,19021010,19022364,19023526,19030689,19033089,19033387	19_19017862_G_A;	19_19022364_ATTTT_A;19_19010933_GC_G;			19_19023526_C_T;19_19022364_ATTTT_A;19_19021010_C_T;19_19019800_G_A;19_19018614_C_T;19_19016785_G_A;19_19014248_C_T;19_19012358_G_A;19_19011865_T_C;19_19010933_GC_G;19_19017862_G_A;	19_19023526_C_T;19_19022364_ATTTT_A;19_19021010_C_T;19_19019800_G_A;19_19018614_C_T;19_19016785_G_A;19_19014248_C_T;19_19012358_G_A;19_19011865_T_C;19_19010933_GC_G;19_19017862_G_A;		0.1113861386138614	19	-1	19010323	19030206
ENSG00000105705	ENSG00000105705	ENQAFSFLYEPNSQGYK	Q8IWZ8	19_19358086_G_A	rs112219496	6.054350601835361e-10	1.2678130373593254e-13	20.0	3.1880700397647057e-20	-1.4389555874571256	0.6023032703351727	-0.06183002444161734	0.026910291230954644	-0.3132130901403305	0.0857603756098623	0.12055157343971484	False	19358086,19350103,19352155,19357612,19358207,19358819,19359058,19359500,19361735,19363630,19363812,19364240,19364319,19366643,19366927,19367190,19367319,19368264,19368310,19370917,19371370,19372150,19372185,19372968,19375372,19378245,19378671,19380596,19380685,19381728,19383298,19387356,19390185,19391851,19393653,19393657,19393683,19394640,19397754,19413092,19413393,19417512,19419984,19425145,194…	19_19413092_C_T;	19_19429849_ATACCCCGTCTC_A;19_19397754_CA_C;		19_19413092_C_T;19_19390185_G_A;19_19387356_C_T;	19_19429915_C_T;19_19429849_ATACCCCGTCTC_A;19_19426613_A_C;19_19426317_C_T;19_19425145_T_A;19_19419984_T_C;19_19417512_C_T;19_19413393_C_T;19_19397754_CA_C;19_19394640_C_T;19_19393683_G_A;19_19393657_T_C;19_19393653_A_G;19_19391851_C_T;	19_19429915_C_T;19_19429849_ATACCCCGTCTC_A;19_19426613_A_C;19_19426317_C_T;19_19425145_T_A;19_19419984_T_C;19_19417512_C_T;19_19413393_C_T;19_19413092_C_T;19_19397754_CA_C;19_19394640_C_T;19_19393683_G_A;19_19393657_T_C;19_19393653_A_G;19_19391851_C_T;19_19390185_G_A;19_19387356_C_T;	19_19390185_G_A;	0.13861386138613865	19	-1	19386827	19431653
ENSG00000105755	ENSG00000105755	EAVLIDPVLETAPR	O95571	19_44011915_T_C		5.5599999335169237e-05	8.593825280271156e-08	12.0	2.001446833538499e-12	-0.8976269711114755	8.407462512935277e-10	-0.7505285006452168	9.717927629469447e-12	-0.9215195340146928	8.298459403662289e-13	-0.6840881365868421	False	44011915				19_44011915_T_C;	19_44011915_T_C;	19_44011915_T_C;		0.1806930693069307	19	-1	44010871	44031396
ENSG00000106049	ENSG00000106049	DLGLAQDSATSTK	P31937	7_27639103_G_C	rs2110527	0.061374241179937984	0.0002604313765885017	13.0	5.446449199531753e-08	-0.3649653808951019	4.552635519703421e-09	-0.4552055336185649	1.331713853140279e-05	-0.268861546815635	2.190555142424679e-08	-0.3589203596014137	False	27639103,27555597,27555914,27558310,27559218,27559694,27560733,27562340,27562341,27562368,27562387,27563238,27563661,27564305,27565161,27565206,27567462,27567472,27568121,27568637,27569530,27569704,27569825,27570173,27571093,27571530,27571945,27575523,27578167,27580645,27581495,27582248,27582783,27583312,27583823,27585076,27585451,27588342,27588734,27589490,27590847,27591093,27591595,27592347,275…		7_27690965_ATACACTGGTATAATAG_A;7_27681850_A_AC;7_27681568_CAAG_C;7_27681566_GGCA_G;7_27680828_CA_C;7_27680827_TC_T;7_27669577_GAATA_G;7_27668859_GC_G;7_27663813_GA_G;7_27646880_CT_C;7_27644046_AT_A;7_27639896_CT_C;7_27637065_TA_T;7_27633764_T_TG;7_27632446_G_GC;7_27626341_CT_C;7_27623052_CAACTTCAAAAA_C;7_27617940_AT_A;7_27613821_A_AGAAAT;7_27610849_AT_A;7_27610433_G_GC;7_27608540_A_AT;7_27608524_…		7_27565206_A_T;7_27565161_A_C;	7_27700482_C_T;7_27698594_G_T;7_27698588_G_T;7_27697939_C_A;7_27696949_T_C;7_27696830_C_A;7_27694288_A_G;7_27694208_A_G;7_27693313_A_G;7_27693304_T_C;7_27693160_G_C;7_27692893_A_T;7_27692428_T_G;7_27692292_T_C;7_27691863_T_C;7_27690965_ATACACTGGTATAATAG_A;7_27690624_A_G;7_27690587_T_C;7_27690363_C_T;7_27690238_T_A;7_27689898_C_A;7_27689824_G_T;7_27689808_A_T;7_27688911_A_G;7_27688859_T_C;7_276882…			0.34405940594059403	7	-1	27565061	27702614
ENSG00000106066	ENSG00000106066	SLMGMDWK	Q9H3G5	7_29040812_C_T	rs66578173	1.1962458351361061e-07	5.725718966787633e-11	16.0	4.6782956056721644e-18	-1.2942598474433178	0.4979787742704127	-0.09198582465631112	1.2650365407779458	-0.14458655848294855	0.865791165364004	0.018581908448905584	False	29040812,29044721,29044740,29046250,29047813,29050667,29051086,29051097,29052301,29053279,29053849,29056986,29059726,29060209,29061724,29062048,29062792,29064618,29064848,29065573,29067866,29069141,29070320,29091538	7_29070320_C_T;	7_29091538_TATATATATTCCAAATATATATATGA_T;7_29064848_A_AGGTTTAATTGGC;			7_29091538_TATATATATTCCAAATATATATATGA_T;7_29069141_G_A;7_29067866_A_G;7_29065573_T_C;7_29064848_A_AGGTTTAATTGGC;7_29064618_C_T;7_29062792_C_T;7_29062048_T_C;7_29061724_C_T;7_29060209_A_G;7_29059726_G_T;7_29056986_A_G;7_29053849_G_A;7_29053279_G_T;7_29052301_G_C;7_29051097_G_A;7_29051086_G_T;7_29050667_T_C;7_29047813_T_C;7_29046250_C_T;7_29044740_T_C;7_29044721_C_T;7_29040812_C_T;			0.14356435643564355	7	-1	29034847	29235067
ENSG00000106153	ENSG00000106153	QFLECAQNQGDIK	Q9Y6H1	7_55984775_T_C	rs11238384	0.010750295598381305	0.00010194578511089126	4.0	1.9330865862354728e-07	-0.7015377184717663	3.7665817035669066e-08	-0.7490958939267305	2.9901154668609865e-06	-0.6466218725954922	1.498070664101715e-07	-0.7019723757313377	False	55984775,55924219,55931263,55933901,55942073,55954905,55954968,55954969,55955281,55956426,55956444,55959998,55963821,55966348,55966769,55968447,55968656,55969265,55971372,55972709,55974939,55975442,55976126,55982894,55985288,55985973,55987570,55991292,55993051,55996994,56000299,56000482,56002302,56008601,56010924,56015200,56016102,56019662,56019694,56022981,56024287,56026371,56032827,56033033,560…								0.2004950495049505	7	-1	56169262	56174269
ENSG00000106299	ENSG00000106299	VIYDFIEK	O00401	7_123317140_A_G	rs1506636	0.0015676968269287294	2.6497209142477335e-06	16.0	4.686691961428188e-11	0.5076894278048183	1.4739054136744871e-08	0.4752330513295444	2.374410909870611e-17	0.5920943974305268	2.94205793280669e-17	0.6626890677429377	True	123317140,123260968,123266094,123269118,123269976,123272278,123276197,123295964,123296605,123297223,123297460,123309538,123310628,123318478,123320183,123320580,123321978,123329754,123340500,123341999,123347063,123348744,123349627,123354536,123355483,123356062,123356921,123357646,123363658,123365122,123369856,123370403,123376855,123393460,123394610,123397102,123397831,123399684,123399726,123400873…		7_123349627_TT_T;7_123340500_CT_C;			7_123376855_A_T;7_123370403_C_T;7_123369856_C_T;7_123365122_G_A;7_123363658_A_G;7_123357646_A_G;7_123356921_A_C;7_123356062_C_T;7_123355483_T_C;7_123354536_A_G;7_123349627_T_G;7_123349627_TT_T;7_123348744_C_T;7_123347063_A_C;7_123340500_CT_C;7_123329754_T_G;			0.3193069306930693	7	-1	123321989	123389121
ENSG00000106305	ENSG00000106305	SYGPAPGAGHVQDYGALK	F8W950	7_6044521_T_G	rs6978310	2.5432579474441065e-09	7.60816664904902e-13	16.0	5.607269311155008e-21	-1.277228251964436	6.100401098134432e-22	-1.3036020264163068	6.952180505748366e-24	-1.0633130313835564	0.1130333869677248	-0.09811739035465084	False	6044521,6043964,6048973,6050390,6052916,6054389,6054987,6055380,6056157			7_6054987_G_A;		7_6056157_T_C;7_6055380_G_A;7_6054987_G_A;7_6054389_C_A;7_6052916_A_G;7_6050390_A_G;	7_6054389_C_A;7_6052916_A_G;7_6050390_A_G;		0.2103960396039604	7	1	6048876	6063465
ENSG00000106524	ENSG00000106524	ASDGFPVYQEK	Q8IV38	7_16674962_T_C	rs61632552	0.07081565068628554	0.0003513459110051777	12.0	1.7546260773546655e-07	0.4993161836586446	2.2224282159148477e-06	0.5279948843371818	3.1435337052540225e-10	0.5787645249710459	1.723092336544884e-12	0.6892167605169527	False	16674962,16672705,16675907,16681091					7_16681091_C_T;7_16675907_G_A;7_16672705_C_T;7_16674962_T_C;	7_16681091_C_T;7_16675907_G_A;7_16672705_C_T;7_16674962_T_C;		0.1707920792079208	7	-1	16639401	16685442
ENSG00000106603	ENSG00000106603	DGQQIPVFK	Q9GZY4	7_43851539_C_A	rs671234	0.024523937209631908	0.00021950347053733	5.0	6.611142441771268e-08	-0.4797890435896164	1.2038744340476842e-08	-0.4691388012010744	4.440122938171277e-10	-0.5577823914084259	4.219161962336554e-14	-0.4388789118639648	True	43851539,43804695,43809764,43810695,43851872,43855156								0.2995049504950495	7	-1	43648055	43769316
ENSG00000106853	ENSG00000106853	LGFDVVFNYK	Q14914	9_114366094_G_C	rs966627	0.0002728310474803214	4.197472482132844e-07	14.0	2.8360316770444128e-09	-0.4746338589185149	3.697366336081831e-10	-0.4624770409316374	3.2746017719855834e-17	-0.7795217499393321	1.6480114751486343e-18	-0.8224189091192521	False	114366094,114368154,114370555,114373410,114376753								0.2747524752475248	9	-1	114312002	114362135
ENSG00000107104	ENSG00000107104	IVEELFGCGDVNAK	Q14678	9_497861_A_C	rs113557734	0.026656209724972527	5.494959851710916e-05	22.0	7.850839123653622e-10	-1.0625208253621468	0.12082922156813446	-0.22089776378839235	0.5059229063913753	-0.22463449629519186	0.0695480896426269	-0.209439533165812	False	497861		9_497860_CA_C;9_497859_CCAC_C;			9_497861_A_C;9_497860_CA_C;9_497859_CCAC_C;			0.07178217821782178	9	1	470291	746105
ENSG00000107201	ENSG00000107201	SLQAFQDYIR	O95786	9_32526146_G_A	rs10813831	0.00039530380068184695	3.5949609730549677e-07	25.0	3.908903564838579e-10	-0.8256684894708651	0.00013743488579685004	-0.37949235628075184	0.7108568602172687	-0.1666239324984849	0.8070234350428707	-0.024319814419578176	True	32526146,32493027,32496037,32496038,32496407,32510928,32526719,32532133,32533375,32533829,32536554,32541532,32545445,32549602,32550101,32550102,32554263,32555093,32556402,32565245,32565289,32565895,32573602,32574277,32576997	9_32526146_G_A;			9_32526146_G_A;	9_32510928_G_A;9_32496407_C_T;9_32496038_A_G;9_32496037_C_T;9_32493027_A_G;			0.22524752475247525	9	-1	32455300	32526322
ENSG00000107551	ENSG00000107551	FEMPVLDSFVEK	Q9H2L5	10_45360594_G_C		0.009751868405808876	0.0001814545335770348	2.0	1.3584866177630354e-05	0.6889263517890165	0.6002833747179809	-0.06393571802505615	0.33403412666019194	0.23783318095107506	0.10410655578383644	0.15211594125533087	False	45360594								0.35396039603960394	10	1	45454855	45491339
ENSG00000107798	ENSG00000107798	EFLPQSAFLK	P38571	10_91004916_C_A		1.736903955821755e-07	2.1377644886094882e-10	7.0	1.8535495691377186e-15	-0.7885503308673751	4.1761810875910853e-14	-0.7090088236439486	3.908056879489927e-21	-0.669148666002934	8.417716774389487e-23	-0.7129245722869769	False	91004916,91002804,91002927,91003419,91004886,91005854,91007360,91008879,91010479,91011458	10_91007360_T_G;		10_91011458_C_T;		10_91011458_C_T;10_91010479_A_C;10_91008879_C_T;10_91007360_T_G;10_91005854_C_T;10_91004886_A_G;10_91003419_A_C;10_91002927_C_T;10_91002804_C_T;10_91004916_C_A;			0.3712871287128713	10	-1	90973326	91174314
ENSG00000107937	ENSG00000107937	SLGVDMDDKDDAHYAVQAR	Q9BZE4	10_1054007_G_T		8.993079258652341e-11	9.752277226461269e-15	32.0	2.0121847782425543e-16	-1.5534255856236818	0.07729619740117225	-0.20503518261683407	0.5403758627338431	-0.16252827528519642	0.09753130677618777	0.15656181927101828	False	1054007,1005908,1008627,1012487,1020530,1022630,1027637,1032568,1034063,1034082,1045099,1055271,1055866,1057554,1058196,1059422,1060218,1061767,1062355,1066483,1066710,1076470,1079372,1080289,1081747,1086797,1089616,1091308,1093992	10_1060218_G_A;	10_1059418_CGGGCGCCTGT_C;			10_1062355_G_A;10_1059422_C_T;10_1059418_CGGGCGCCTGT_C;10_1058196_C_T;10_1057554_C_A;10_1055866_A_T;10_1055271_C_T;10_1045099_C_T;10_1054007_G_T;		10_1061767_G_A;	0.09158415841584157	10	1	1034338	1065876
ENSG00000107959	ENSG00000107959	FFTYGNFPLEQHLK	Q5JRX3	10_3214516_A_G		0.010504775290198474	1.1998666392581502e-05	33.0	2.0013974317328918e-09	0.5632717872004402	1.4809525291991518e-11	0.6861427098309418	0.0015487682249235384	0.4746731997486598	1.2248766899355105e-05	0.4450488333782607	False	3214516,3204561,3205187,3205194,3205709,3205851,3206027,3206256,3206365,3208140,3208210,3209872,3212795,3213564,3214369,3214995,3215348,3216387,3223179,3224809,3225928		10_3214995_AC_A;		10_3214995_AC_A;	10_3214369_A_G;10_3213564_T_C;10_3212795_C_G;10_3209872_A_G;10_3208210_T_C;10_3208140_G_C;10_3206365_T_C;10_3206256_C_A;10_3205851_C_G;10_3205709_C_A;10_3205194_G_A;10_3205187_C_T;10_3204561_C_T;10_3214516_A_G;		10_3206027_A_G;	0.33910891089108913	10	-1	3179920	3215003
ENSG00000108592	ENSG00000108592	SDDDGFEIVPIEDPAK	Q8IY81	17_61917502_T_A		3.4506271877095714e-09	5.64300246085487e-13	30.0	6.82000771205581e-14	0.3821000981185129	8.221075152757264e-14	0.6094372428276249	3.870378557724086e-38	0.9397760804556758	6.254114529653567e-41	1.0099817135735514	False	61917502,61776479,61779927,61782325,61784963,61785374,61788634,61791210,61793818,61794839,61795328,61795439,61796306,61797515,61797862,61797873,61798604,61798724,61799198,61799840,61802049,61802378,61802612,61805607,61805747,61806138,61806249,61807170,61811920,61812655,61812733,61812995,61813169,61813906,61814762,61816590,61817124,61819222,61819960,61820902,61821161,61822223,61822394,61823899,618…	17_61903445_G_C;17_61901197_T_A;	17_61904465_C_CG;17_61904337_TCCACTTCCAGTTTC_T;17_61900954_CA_C;17_61898134_AC_A;17_61897799_CTGAGTGGAAAGGACATCTGTCTAATATCCAACATTCCAGGCTTTCTAAAGAAATTACCAGACTGGGCACGGTGGCTCACGCCTGTAATCCCTGCACTTTGGGAGGCTGAGGTGGGCAGATCACCTGAGGTCAGGAGTTTGACCAGCCTGGCCAACATGGTGAAACCCCATCTCTACTAAAAATACAAAAATTAGCTGGGCGTGGTGGTTGGCACCTGTAATCCCAGCTACTCAGAAGGCTGACTCAAGCGATTCAAGGAGAATCAGGCTGCAGTGAGCCAAGATCGTGCCATTGCACTCCAGCCT…	17_61904465_C_CG;17_61904465_C_G;17_61901439_T_C;17_61897799_CTGAGTGGAAAGGACATCTGTCTAATATCCAACATTCCAGGCTTTCTAAAGAAATTACCAGACTGGGCACGGTGGCTCACGCCTGTAATCCCTGCACTTTGGGAGGCTGAGGTGGGCAGATCACCTGAGGTCAGGAGTTTGACCAGCCTGGCCAACATGGTGAAACCCCATCTCTACTAAAAATACAAAAATTAGCTGGGCGTGGTGGTTGGCACCTGTAATCCCAGCTACTCAGAAGGCTGACTCAAGCGATTCAAGGAGAATCAGGCTGCAGTGAGCCAAGATCGTGCCATTGCACTCCAGCCTGGGCAACAGAGCGAGACTCCATCTCAAAAACA…	17_61904728_G_A;17_61904724_T_C;17_61904546_A_G;17_61904465_C_CG;17_61904465_C_G;17_61904337_TCCACTTCCAGTTTC_T;17_61896814_C_T;	17_61904465_C_CG;17_61904465_C_G;17_61904337_TCCACTTCCAGTTTC_T;17_61902822_C_G;17_61901657_A_G;17_61901641_T_C;17_61901439_T_C;17_61900954_CA_C;17_61898135_C_A;17_61898134_AC_A;17_61897799_CTGAGTGGAAAGGACATCTGTCTAATATCCAACATTCCAGGCTTTCTAAAGAAATTACCAGACTGGGCACGGTGGCTCACGCCTGTAATCCCTGCACTTTGGGAGGCTGAGGTGGGCAGATCACCTGAGGTCAGGAGTTTGACCAGCCTGGCCAACATGGTGAAACCCCATCTCTACTAAAAATACAAAAATTAGCTGGGCGTGGTGGTT…			0.3564356435643564	17	-1	61896793	61907372
ENSG00000109265	ENSG00000109265	DLPSFLVPSLPYPPQK	Q6ZU35	4_56915121_T_C	rs111995204	2.1987361026823992e-07	1.607227059001836e-10	12.0	8.53126777930658e-14	0.7933351375365498	3.0534734003420167e-10	0.6158215068195703	2.332729275524117e-26	0.6323241795956881	7.734396326599778e-28	0.6470859235218771	False	56915121,56912111,56913556,56914418,56915061,56915247,56916573,56916879,56916925,56916926,56917258,56917315,56917614,56917693,56919842,56920667,56921178,56921498,56921614,56924685,56925572,56926206,56926517,56927056,56927194,56927511,56928913,56928946,56932664,56934093,56939138,56939472,56939533,56939544,56939762,56939951,56940009,56940203,56940302,56940420,56940792,56940941,56941021,56941258,569…								0.3242574257425743	4	1	57036361	57194791
ENSG00000109323	ENSG00000109323	VSSTEDWSFNSK	O00462	4_103607635_G_A	rs227284	2.1987361026823992e-07	8.464992721462224e-11	23.0	2.4893774373492786e-15	-0.6909468335698388	2.688978545218829e-13	-0.7269874522025286	3.5515754376727797e-29	-0.8001427010581842	2.6048947366347483e-27	-0.9078912798172474	False	103607635,103603949,103605916,103606672,103606872,103606886,103607253,103607806,103608308,103609793,103610248,103610310,103610872,103611364,103611533,103612018,103612043,103612137,103612917,103613266,103613299,103625183,103625590,103626859,103627874,103627968,103632963,103633815,103633894,103634220,103635183					4_103635183_T_C;4_103634220_C_T;4_103633894_T_C;4_103633815_G_A;4_103632963_C_T;4_103627968_T_C;4_103627874_A_G;4_103626859_T_C;4_103625590_C_T;4_103625183_T_C;4_103613299_A_G;4_103613266_A_G;4_103612917_T_C;4_103612137_G_A;4_103612043_T_C;4_103612018_G_T;4_103611533_A_T;4_103611364_G_A;4_103610872_A_G;4_103610310_T_A;4_103610248_C_T;4_103609793_T_A;4_103608308_C_T;4_103607806_C_T;4_103607253_C_G…			0.349009900990099	4	-1	103552660	103682151
ENSG00000109814	ENSG00000109814	IVQNSNGYK	O60701	4_39526641_G_A	rs13129975	0.0205570062735485	2.869830559507788e-05	30.0	1.7049280947265323e-08	0.44671860004700026	5.322644503893702e-11	0.3763610862130866	2.763818944188066e-16	0.4518126628235168	1.4389097211903866e-17	0.6852322067022185	False	39526641,39515122,39516658,39528938,39528939,39533080,39533948				4_39528939_C_T;4_39528938_TC_AT;4_39528938_TC_AT;4_39528938_T_A;	4_39528939_C_T;4_39528938_TC_AT;4_39528938_TC_AT;4_39528938_T_A;4_39516658_G_A;4_39515122_T_G;4_39526641_G_A;	4_39528939_C_T;4_39528938_TC_AT;4_39528938_TC_AT;4_39528938_T_A;4_39516658_G_A;4_39515122_T_G;4_39526641_G_A;		0.4232673267326733	4	-1	39500375	39529931
ENSG00000109861	ENSG00000109861	LELVHHGPMAVAFEVYDDFLHYK	P53634	11_88055789_A_T	rs452648	0.03636324700409197	0.00013689645736576078	13.0	2.5530113926620755e-07	0.3974465216008461	2.020174410069808e-05	0.3857814222687329	1.8585900375732142e-14	0.5811169760845658	3.2357426243102736e-15	0.7444524550032474	False	88055789,88054346,88055794,88056130,88056396,88059683,88059739,88059740,88059881,88059882,88060499,88061692,88062348,88063046,88063432,88063741,88064750,88067754,88068004,88068052,88068329,88068596,88069323		11_88062348_T_TA;11_88059612_CTACAAGACAATAAAAACTAGGGTTACAAGCCAACAAGGATCATATTGTCTCTTAATATTTAATCATATCAGTTTCTTTAAGTAAAAAAAAAAAAAAATACCAGCACTGATATTTGAGATCCTGGTATATTTTTGTAAATGTTAAGACATTCACAGGAAAGATGCCATTCTGAAGCTAAATGCTTAAGCAACATGTACTGCACATGCAACCAACATGCTTTAGAAGCACATGCATCTGAAGGTAACTGCCACTGAAAAAAACGAATATGTTTCTGAAACATACTTAAGAAACAGGCTAAATATAGTAACTTAGATACATTAACATGTATACCTTGCAAACTTTAATTTAGGCTCAGTGCTGCCTGAATCC…	11_88059612_CTACAAGACAATAAAAACTAGGGTTACAAGCCAACAAGGATCATATTGTCTCTTAATATTTAATCATATCAGTTTCTTTAAGTAAAAAAAAAAAAAAATACCAGCACTGATATTTGAGATCCTGGTATATTTTTGTAAATGTTAAGACATTCACAGGAAAGATGCCATTCTGAAGCTAAATGCTTAAGCAACATGTACTGCACATGCAACCAACATGCTTTAGAAGCACATGCATCTGAAGGTAACTGCCACTGAAAAAAACGAATATGTTTCTGAAACATACTTAAGAAACAGGCTAAATATAGTAACTTAGATACATTAACATGTATACCTTGCAAACTTTAATTTAGGCTCAGTGCTGCCTGAATCCACATGACTAGGTACTAG…	11_88056396_T_G;11_88056130_A_G;11_88055794_A_G;11_88054346_G_C;11_88055789_A_T;	11_88069323_G_T;11_88068596_G_T;11_88068329_T_A;11_88068052_G_T;11_88068004_T_A;11_88067754_C_G;11_88064750_A_G;11_88063741_G_T;11_88063432_C_A;11_88063046_T_C;11_88062348_T_TA;11_88062348_T_A;11_88061692_C_T;11_88060499_T_C;11_88059612_CTACAAGACAATAAAAACTAGGGTTACAAGCCAACAAGGATCATATTGTCTCTTAATATTTAATCATATCAGTTTCTTTAAGTAAAAAAAAAAAAAAATACCAGCACTGATATTTGAGATCCTGGTATATTTTTGTAAATGTTAAGACATTCACAGGAAAGA…			0.2376237623762376	11	-1	88026760	88070955
ENSG00000110002	ENSG00000110002	FVLPAVLNPR	O00534	11_124006330_C_T	rs4375453	0.022321606942997358	3.69831762386164e-05	26.0	2.9736343994776337e-08	0.4524931522356361	3.273172319799893e-08	0.4525701666685178	7.344140376029347e-22	0.6993504149484581	9.141830412061331e-15	0.6108044076498087	False	124006330					11_124006330_C_T;			0.4257425742574257	11	1	123986069	124018428
ENSG00000110074	ENSG00000110074	FQTIDLSPFLFTR	Q96CU9	11_126149651_C_G	rs672908	3.266913257454633e-07	2.289670653440913e-10	14.0	1.9884690053366918e-13	0.4627910698205033	3.9751408333891766e-16	0.8360629051278772	2.555118894497693e-33	1.049628767360556	7.126996813751023e-36	0.9964529985879604	False	126149651,126069841,126070614,126071398,126072688,126075219,126076824,126078501,126080757,126081336,126083337,126085031,126086768,126087038,126091557,126093098,126093217,126095567,126095747,126099387,126103368,126111520,126114630,126129103,126130232,126134698,126139100,126139313,126140354,126140468,126141134,126148432,126151761,126153179,126161490,126163124,126163691,126164349,126166577,126167135…		11_126141134_A_AAAGG;	11_126139313_T_A;	11_126139100_T_C;	11_126141134_A_AAAGG;11_126140468_A_G;11_126140354_G_A;11_126139313_T_A;	11_126141134_A_AAAGG;11_126140468_A_G;11_126140354_G_A;11_126139313_T_A;11_126139100_T_C;		0.2376237623762376	11	1	126138950	126148026
ENSG00000110218	ENSG00000110218	VYEILPTFDVLHFK	Q96RD7-2	11_93918837_T_C	rs3020004	0.004679496858389871	2.5104396611760106e-05	6.0	1.182337555663074e-09	-0.6073846918408925	1.2245877251631426e-05	-0.3167584188664627	2.0941453404771194e-07	-0.35536244567741965	3.633193740687391e-08	-0.4368229437296886	False	93918837,93915248,93917192,93921611,93921742,93922134,93926587,93926656,93927060,93927529,93927801,93928024,93928549,93928787,93929365,93930073,93931412,93932249,93932943,93932958,93933394,93933815,93934545,93935372,93935825,93936094,93936435,93936550,93936638,93937274,93939054,93941143,93942081,93943056,93943329,93945771,93945915,93946953,93947096,93949560,93952146,93953334,93955823,93957405,939…								0.400990099009901	11	1	93862094	93915138
ENSG00000110697	ENSG00000110697	IEQFIHDVGLR	O00562-2	11_67454535_G_A	rs145107833	0.08075510024778322	0.00046734597378159483	11.0	0.0005781504635155272	-0.9178834388700698	0.21877297326867645	-0.19689975830328865	0.9088528048135088	-0.3122102378141707	0.998105213309632	0.00019057365918418348	False	67454535,67416913,67417662,67421341,67435976,67436146,67436893,67437076,67438195,67438284,67438476,67440592,67440834,67441053,67445077,67464694,67466915,67472905,67473742,67474045,67474707,67475286,67475347,67475601,67476525,67478723,67478812,67478895,67479090,67479308,67480601,67480840,67480869,67480977,67481161,67482243,67483893								0.08663366336633663	11	-1	67259239	67273734
ENSG00000111615	ENSG00000111615	ILQDDVACDIIK	Q13601	12_75890007_C_T	rs61933362	1.533809438569388e-11	4.2299802938269584e-15	11.0	7.657480545073977e-23	-1.225327630161815	0.3094847722515162	0.0936917182919661	1.418225535696387e-11	-0.3889302460135841	6.081230337481799e-24	0.6892373273870631	False	75890007,75871264,75872256,75877304,75884357,75884876,75886695,75887350,75888251,75889601,75889876,75890333,75890652,75891678,75893381,75893399,75893478,75894746,75895619,75896664,75897488,75898340,75900382,75900588,75901300,75904102,75904837,75905994,75906192,75906565,75907288,75907717,75911349,75916811,75917890,75923892,75925402	12_75900382_C_T;	12_75904837_G_GCTTT;12_75893478_CA_C;12_75893381_CAA_C;		12_75893478_CA_C;12_75893399_T_G;12_75893381_CAA_C;12_75891678_A_G;	12_75904837_G_GCTTT;12_75904837_G_A;12_75904102_T_C;12_75901300_C_A;12_75898340_T_C;12_75897488_G_A;12_75896664_C_T;12_75895619_T_C;12_75894746_T_C;		12_75900588_A_G;	0.2301980198019802	12	-1	75890684	75905416
ENSG00000111696	ENSG00000111696	VLYFGDHIYSDLADLTLK	Q86UY8	12_104180872_G_A	rs12368209	0.024496652761071352	8.399182573577105e-05	13.0	4.242168751083485e-08	-0.7095645285887902	2.3170811010908323e-07	-0.5675796224662084	4.104527088999924e-15	-0.09407079120605123	0.29291274656973754	-0.08999514115982164	False	104180872					12_104180872_G_A;	12_104180872_G_A;		0.20544554455445546	12	-1	104164231	104234975
ENSG00000111707	ENSG00000111707	LSCVISSVGANEIWVR	Q9H7L9	12_118889287_C_T	rs983421	0.07134379730725968	0.00035570877361921984	12.0	0.0007565890589163459	-0.6013010263765197	0.9376533041701796	0.012406015580002316	0.11640711156439705	-0.12272878683308484	0.1254539021224	0.1642548016932067	True	118889287								0.056930693069306926	12	1	118814185	118855840
ENSG00000111752	ENSG00000111752	DLGNPNTAPPTPELHGINPVFLSSNPSR	P78364	12_9090528_G_A		0.00038456882929500133	5.435825411089149e-07	16.0	5.973075857516427e-11	-1.1221820879252635	0.05009925760700007	-0.27398009919013044	0.0048682532247793795	-0.3779939341259336	0.004168933831996125	-0.2417923430948425	True	9090528	12_9090528_G_A;			12_9090528_G_A;	12_9090528_G_A;	12_9090528_G_A;		0.10148514851485148	12	1	9066492	9094063
ENSG00000111802	ENSG00000111802	SLDLLGLEK	O95551	6_24661511_T_C		0.020541373374064743	8.578364613555816e-05	10.0	3.4458235662899163e-08	0.5212651439897589	5.0386229988081325e-14	0.6587218467570821	1.45006215985805e-17	0.709094373112668	1.6916075957636263e-25	0.8489913633516661	False	24661511,24652003,24653376,24657482,24662052,24667205,24669472,24669786,24669945,24673609,24675324,24681411,24681655,24681732,24682541,24682891,24684777,24684796,24684819,24685021,24686291,24687765,24687999,24688849,24688958,24688983,24689311,24689312,24690001,24691027		6_24667205_T_TCC;6_24662052_G_GAAAG;		6_24667205_T_TCC;6_24667205_T_C;	6_24662052_G_GAAAG;6_24657482_C_G;6_24652003_T_C;6_24661511_T_C;		6_24653376_G_A;	0.2797029702970297	6	-1	24650205	24667261
ENSG00000111913	ENSG00000111913	VDELYEAYCIQR	Q9Y4F9	6_24979164_T_A		2.0845429084945147e-06	2.037066780667529e-09	12.0	8.559431963824005e-13	0.8202756612065697	3.833840310836568e-12	0.7908568252673613	6.974064051631592e-26	0.9078438906480324	2.214210903968792e-23	0.8694866863211985	False	24979164,24957131,24958935,24959210,24960647,24963404,24965782,24967294,24972107,24976739,24981223,24986031		6_24972107_TGTCAAATTCTTCAACTATA_T;			6_24981223_T_C;6_24976739_G_C;6_24972107_TGTCAAATTCTTCAACTATA_T;6_24972107_T_C;6_24967294_C_G;6_24965782_G_A;6_24963404_C_T;6_24960647_C_T;6_24959210_C_T;6_24958935_G_T;6_24957131_G_A;6_24979164_T_A;			0.4108910891089109	6	-1	24797601	25042238
ENSG00000112294	ENSG00000112294	GIHDAFVK	P51649	6_24494975_C_G		0.0034793625606512105	8.134664541060994e-06	13.0	8.997183341381088e-08	-0.5300281023718371	5.4599927301215305e-06	-0.37902750440045707	8.21768603117353e-15	-0.637219648172404	6.279898042211966e-16	-0.7571411622169917	False	24494975,24475899,24479197,24479524,24480897,24481039,24482372,24485715,24486055,24487745,24487894,24488411,24489652,24491475,24495050,24496054,24497385,24498052,24498243					6_24498052_G_A;6_24497385_C_T;6_24496054_G_A;			0.3836633663366337	6	1	24495080	24537435
ENSG00000112304	ENSG00000112304	TLAFTSVDLTNK	Q9NPJ3	6_24684819_A_T		2.3017729749689787e-10	1.762755419385122e-13	5.0	2.5224171411857622e-18	0.8990439296903676	2.391035200105221e-19	0.9549714580638616	7.462553245790028e-34	1.198821593792276	5.115747159833871e-35	1.0545888129519594	False	24684819,24653376,24657482,24661511,24667205,24669472,24669786,24669945,24673609,24675324,24681411,24681655,24681732,24682541,24682891,24684777,24684796,24685021,24686291,24687765,24687999,24688849,24688958,24688983,24689311,24689312,24690001,24691027		6_24688957_AA_A;6_24684777_A_ACCAGAAATACAGAGTTTC;6_24681732_T_TA;6_24681411_CT_C;		6_24687765_A_G;	6_24691027_A_G;6_24690001_G_T;6_24689312_A_G;6_24689311_TA_CG;6_24689311_T_C;6_24689311_TA_CG;6_24688983_A_G;6_24688958_A_G;6_24688957_AA_A;6_24688849_C_T;6_24687999_T_C;6_24687765_A_G;6_24686291_C_A;6_24685021_A_G;6_24684796_C_T;6_24684777_A_ACCAGAAATACAGAGTTTC;6_24682891_T_C;6_24682541_T_C;6_24681732_T_TA;6_24681655_T_C;6_24681411_CT_C;6_24675324_A_G;6_24673609_A_G;6_24669945_T_C;6_24669786_T_A…			0.2797029702970297	6	1	24667263	24705293
ENSG00000112339	ENSG00000112339	EISPLVAITPFDFK	Q9Y450-2	6_135207781_T_G		0.021840440289663	2.5357341034669154e-05	37.0	8.604725817348039e-09	-1.2632431848805372	0.3495913317953589	-0.37683013698164136	0.35449540392861084	-0.3946568000279318	0.9594869124527716	0.0045416111107212396	False	135207781,135177716								0.0594059405940594	6	-1	135281516	135424194
ENSG00000112796	ENSG00000112796	LIELDQYLDK	Q9UJA9	6_46046732_G_T		0.06657169586637726	0.0012745568192677231	3.0	8.3946783947958e-06	-1.434835879845975	0.006084986903028573	-0.5297769756193111	0.05331363913449093	-0.4046828759665968	0.13879335928184425	0.16490875149020895	False	46046732,46047640,46048241,46054285,46054686,46062147,46062235,46065758,46069652,46070284,46072160,46074142,46076668,46078561								0.07920792079207921	6	-1	46126924	46138708
ENSG00000112992	ENSG00000112992	EVLASDLVVK	Q13423	5_43617413_G_A	rs10074229	0.007727607845229502	8.948582233819246e-06	31.0	7.484382556983909e-08	0.6573742450867565	1.2177402500226722e-11	0.6951535374967399	1.7679756325109137e-10	0.6993520130220957	2.874493452751889e-19	0.9447617657259304	False	43617413,43616702,43619961,43620582,43622444,43623453,43625827,43628669,43637233,43645292,43646456,43647709,43647964,43647996,43648697,43648914,43658051,43658483,43659571,43660416,43660535,43663640,43665342,43667010,43670374,43670749,43672081,43673924,43680667,43681293,43688199,43692295,43716446,43721168,43724452,43730908,43732921,43738311,43739894,43740532,43740638,43740925,43741302,43741591,437…		5_43692295_AT_A;5_43660535_CT_C;5_43623453_A_AGTT;			5_43692295_AT_A;5_43688199_C_T;5_43681293_T_C;5_43680667_A_G;5_43673924_T_C;5_43672081_A_G;5_43670749_G_C;5_43670374_A_T;5_43667010_A_G;5_43665342_A_T;5_43663640_G_A;5_43660535_CT_C;5_43659571_A_G;5_43658483_A_C;5_43658051_G_A;5_43648914_A_G;5_43648697_T_C;5_43647964_T_C;5_43647709_T_C;5_43646456_C_T;5_43645292_T_C;5_43637233_G_A;5_43628669_C_T;5_43625827_T_C;5_43623453_A_AGTT;5_43622444_A_C;5_43…			0.09405940594059406	5	1	43602794	43707507
ENSG00000113368	ENSG00000113368	IGDTSVSYK	P20700	5_126027077_A_G	rs12656950	0.026206500515427958	2.364449131103587e-05	50.0	2.629841368034884e-05	0.2943725887462778	0.0012566415287756354	0.270221202243083	0.10456138216399843	0.18070593282112804	0.0042504739927883865	0.1982216480503728	True	126027077,126027159,126028261,126029552,126031904,126032596								0.4702970297029703	5	1	126112315	126172712
ENSG00000114416	ENSG00000114416	SSISSVLK	P51114	3_180433749_G_A	rs1914804	0.00017686138802589852	1.05193865573689e-07	34.0	1.9834833114254735e-05	0.3936780157162698	0.07903533208362802	0.1510913545540966	0.4792817579058761	0.1574295523017931	0.767853291574121	0.015439671573625132	True	180433749								0.3886138613861386	3	1	180585929	180700541
ENSG00000114904	ENSG00000114904	ASLSVAGPGKPQEEDQPLPAR	P51957	3_52826846_G_A	rs2071508	5.9321641735341736e-05	1.0224911391051332e-07	11.0	3.750621784551002e-10	-0.7511640132495441	3.8028598649596376e-06	-0.4657463137303052	0.0457618938655362	-0.18950876871480507	0.1817552446078272	-0.09216254039419414	False	52826846,52585760,52585990,52596398,52597664,52599922,52600064,52607682,52607685,52610651,52612178,52613656,52616978,52618319,52624233,52624723,52624769,52625019,52627486,52628321,52628816,52629386,52629633,52629750,52630548,52633929,52634605,52642936,52643685,52644836,52646903,52647449,52651966,52653414,52656092,52657002,52657472,52659124,52659963,52661640,52666650,52666866,52672167,52672531,526…	3_52797634_G_C;	3_52784800_TAA_T;3_52778051_C_CG;3_52774835_AT_A;3_52747623_CA_C;3_52747481_AAAAAT_A;		3_52802402_A_C;	3_52803205_T_C;3_52802402_A_C;3_52800731_A_G;3_52795224_A_T;3_52793239_A_G;3_52790213_T_C;3_52787603_T_C;3_52787242_C_T;3_52785168_A_C;3_52784800_TAA_T;3_52782274_T_G;3_52781539_T_G;3_52778347_T_C;3_52778051_C_CG;3_52778051_C_T;3_52774835_AT_A;3_52766606_G_A;3_52764624_C_T;3_52763954_T_C;3_52762992_G_A;3_52748271_C_G;3_52747742_G_A;3_52747623_CA_C;3_52747481_AAAAAT_A;	3_52803205_T_C;3_52802402_A_C;3_52800731_A_G;3_52785168_A_C;3_52784800_TAA_T;3_52782274_T_G;3_52781539_T_G;	3_52802402_A_C;	0.34405940594059403	3	-1	52744800	52804965
ENSG00000115306	ENSG00000115306	KHEAIETDIAAYEER	Q01082	2_54688234_A_G	rs13033535	5.9321641735341736e-05	7.524343692648348e-09	150.0	7.016991775026508e-13	-0.6427581235193731	1.1138958772529963e-07	-0.5220535996545905	1.0896951216142036e-06	-0.21362444916180767	9.507356896004593e-07	-0.2699488105111512	False	54688234,54687254,54688236,54688680,54688864,54690227,54690658,54690676,54690939,54690948,54690964,54698065,54698645,54699021,54699067,54701379,54703048,54714119,54714362,54715052		2_54699067_AACTTC_A;2_54690227_TG_T;			2_54715052_C_T;2_54714362_T_A;2_54714119_G_A;2_54703048_C_G;2_54701379_C_A;2_54699067_AACTTC_A;2_54699021_T_C;2_54698645_A_G;2_54698065_T_G;2_54690964_T_A;2_54690948_C_A;2_54690939_G_A;2_54690676_A_C;2_54690658_C_T;2_54690227_TG_T;2_54688864_G_C;2_54688680_C_T;2_54688236_C_A;2_54687254_C_T;2_54688234_A_G;			0.20297029702970296	2	1	54683422	54896812
ENSG00000115339	ENSG00000115339	DQLLYNPFLK	Q14435	2_166622109_C_T	rs2113841	0.004277558008237468	1.2292971383982366e-05	11.0	3.318075331522332e-08	-0.5946851379373979	1.015645868345914e-12	-0.6277910999354415	1.0211687706786381e-23	-0.7340943120685248	1.0525398822972576e-25	-0.7033692481735011	False	166622109,166560046,166561432,166561945,166567403,166568023,166571303,166571946,166572906,166573776,166574200,166575483,166576386,166576956,166577489,166577874,166578114,166582031,166583141,166583244,166585566,166595015,166597357,166601046,166604037,166605010,166605800,166605927,166606993,166607746,166610827,166611006,166611086,166613243,166614577,166614779,166615555,166616667,166617626,166617657…		2_166622007_AT_A;2_166618073_AAAAC_A;	2_166618262_C_T;	2_166605010_A_T;	2_166622598_C_G;2_166622007_AT_A;2_166620636_C_G;2_166618262_C_T;2_166618073_AAAAC_A;2_166617657_A_G;2_166617626_T_A;2_166616667_A_G;2_166615555_C_T;2_166614779_G_A;2_166614577_T_C;2_166613243_G_T;2_166611086_C_T;2_166611006_C_T;2_166610827_C_T;2_166607746_T_C;2_166606993_G_T;2_166605927_A_C;2_166605800_A_G;2_166622109_C_T;	2_166620636_C_G;2_166618262_C_T;2_166618073_AAAAC_A;2_166617657_A_G;2_166617626_T_A;2_166616667_A_G;2_166615555_C_T;2_166614779_G_A;2_166614577_T_C;		0.4752475247524752	2	-1	166604101	166651192
ENSG00000115486	ENSG00000115486	RLQQLLPLK	P38435	2_85801082_A_T		0.0007487463029271472	1.8590715609764046e-06	10.0	6.607216613070328e-12	-1.0639773612738954	0.054339079369250684	-0.1858225012510113	4.908768304037849e-05	-0.24511511868790395	0.05352903842852769	-0.16442009219959808	False	85801082,85780536	2_85780536_C_T;							0.3143564356435644	2	-1	85771846	85788670
ENSG00000115504	ENSG00000115504	LNFLDEAEK	Q8NDI1-3	2_62693830_A_G	rs4413143	0.07266220322123489	0.00013650764620514082	32.0	7.871864080095383e-08	0.5130518406251401	0.2881382757817972	0.07768152856758047	0.06586810144013579	0.2415026089722083	0.4784820354235878	0.03669959060550223	False	62693830,62695313,62696477,62698696,62699009								0.4752475247524752	2	1	62900986	63273622
ENSG00000115808	ENSG00000115808	FYDNNTGK	O43815	2_37078839_A_G	rs3770781	0.0071957060840711455	8.524289844717524e-06	30.0	8.126375646767505e-09	0.43599172238544304	6.473860982954514e-10	0.4962424304249775	7.183682579764133e-14	0.360694610727269	1.934395473412751e-14	0.4654165225440386	True	37078839,37066018,37067137,37068428,37075013,37079583,37081212,37095139,37097009,37102249				2_37075013_T_A;	2_37102249_A_G;2_37097009_T_C;2_37095139_G_C;2_37079583_T_C;2_37078839_A_G;			0.4306930693069307	2	-1	37070783	37193615
ENSG00000115816	ENSG00000115816	EESQIPVDEVFFHR	Q03701	2_37422076_C_T	rs149381909	0.05616618989773813	6.690985088797597e-05	45.0	2.5757525918458427e-07	-0.38158206842120457	9.441812794402964e-09	-0.42998179442566986	8.01109726785894e-12	-0.4988937364238799	1.6316991975635172e-11	-0.5188351019348186	False	37422076								0.3886138613861386	2	-1	37428755	37458856
ENSG00000116157	ENSG00000116157	VVGAWDPTVSVEEVRPQITALVR	Q96SL4	1_53048482_T_C	rs835352	0.06859179744935764	0.0005689189638845635	7.0	1.718215938217919e-05	0.40001104792149456	7.799707692964799e-05	0.3399852363937242	7.1233095465605455e-09	0.4797844269841391	1.6505826797685843e-08	0.4344783713052391	False	53048482								0.41336633663366334	1	1	53068044	53074723
ENSG00000116212	ENSG00000116212	FTEPGAGLR	Q9Y546	1_54480410_T_A	rs11805505	0.05706074474756194	0.0002204435684874784	14.0	5.102624523829726e-07	0.9199122968244712	0.07059005675223333	0.2784295925379605	0.09141431490569853	0.3767692069407293	0.1391410357269138	0.18396111123327846	False	54480410,54436645,54436691,54437173,54439366,54441756,54443867,54468086,54475188,54476147,54476972,54477125,54482323,54482820,54483636,54483641,54486829,54487384,54487588,54487776								0.06435643564356436	1	1	54411750	54433841
ENSG00000116353	ENSG00000116353	LALNCVGGK	Q9BV79	1_29594563_T_C	rs7550930	0.005776992493695525	2.1659977440364528e-05	9.0	3.778860570071098e-09	-0.5372869173666078	0.0001110345972373926	-0.3354131866274763	1.2037308318168213e-07	-0.49154963175433003	4.7061880435548153e-07	-0.39441435101209776	False	29594563								0.2920792079207921	1	-1	29519385	29557454
ENSG00000116560	ENSG00000116560	RMEELHNQEMQK	P23246	1_35566871_C_G	rs3125603	0.06398547476866973	0.00010561483387123898	34.0	0.0004004673608441842	-0.4794470850321819	0.4760400640277196	-0.09177323671418147	1.9275914111114385	-0.12830976408872016	0.5104793922754984	-0.05928020081588655	True	35566871,35436425,35536453,35546157,35552436,35553439,35554108,35561510,35563206,35563542,35571417,35571656,35574197,35582731,35582949,35584165,35586432,35586534,35589057,35591626,35592376,35595395,35597659,35598114,35600893,35602075,35603693,35609662,35611670,35612236,35619907,35622791,35624192,35624263,35625049,35625464,35628365,35629439,35630298,35631832,35632124,35632518,35632701,35632811,356…								0.09405940594059406	1	-1	35641979	35658749
ENSG00000116791	ENSG00000116791	SDIAVPIPK	Q08257	1_75189847_T_C	rs1424671	5.7364104465520285e-12	8.479303674805383e-16	17.0	9.021496611475386e-22	-0.9424991024008944	4.2189313647625325e-24	-1.048452712282358	7.900158579756573e-27	-1.0973637128680742	3.109715571217272e-26	-1.1206758246686914	False	75189847,75192338,75197283,75197614,75199973,75205344,75207320,75209312,75209522,75211738,75213088,75213566,75213619,75214390,75216449,75218612,75219066,75219125,75220929					1_75197614_G_T;1_75197283_G_T;1_75192338_C_G;1_75189847_T_C;			0.4876237623762376	1	-1	75171170	75199092
ENSG00000117054	ENSG00000117054	KGDEYIINGQK	Q5T4U5	1_76314659_A_G	rs5745412	0.056124895056183864	0.0001364402521780281	22.0	2.099354742404651e-06	0.5600812650576472	4.9991218388447925e-06	0.6018180351694244	9.176777365033001e-10	0.6782332092410035	2.491346211412924e-06	0.4888444470920981	False	76314659,76423303								0.14356435643564355	1	1	76190036	76253260
ENSG00000117480	ENSG00000117480	ELAPEAVLFTYVGK	O00519	1_46897698_C_T	rs1535737	0.009251541893021185	8.524215935893636e-05	4.0	3.7865546280206854e-08	0.6238113931858287	0.0011040823435031237	0.3600297930113073	5.604863437374473e-07	0.4752722923760418	6.529149500011611e-06	0.38979613155139936	False	46897698								0.4455445544554456	1	1	46859937	46879520
ENSG00000117593	ENSG00000117593	NFAADHFNQEILPVFLNANR	Q6PI48	1_173724352_C_G	rs61826821	0.024496652761071352	4.555687587192181e-05	24.0	3.235705447253895e-07	-0.4987769062851864	3.030495237233861e-05	-0.3854065590833389	1.0809367123773866e-09	-0.4792742037762421	1.2733519480668441e-09	-0.5506979578014193	False	173724352,173674520,173674757,173676562,173678039,173678916,173679382,173686353,173689443,173689891,173691271,173692406,173694542,173697103,173698114,173700630,173702764,173703673,173705358,173707088,173712679,173712680,173713680,173715309,173716068,173717675,173719627,173724942,173729431,173730310,173730799,173731721,173732541,173734019,173735570,173736346,173736536,173738699,173744229,173744302…		1_173802433_GA_G;1_173797449_TTT_T;			1_173804557_A_C;1_173804470_C_T;1_173802433_GA_G;1_173797451_T_C;1_173797449_TTT_T;1_173794797_C_T;			0.3242574257425743	1	1	173793641	173827684
ENSG00000117877	ENSG00000117877	PQAQAALAAPK	O15446	19_45911330_T_A	rs2013521	0.0005978226059103565	9.442692829982895e-07	15.0	3.4497586121126164e-13	-1.0043523555766896	1.7157914967856008e-06	-0.5475004935274055	5.279428971453424e-12	-0.10411629034594244	0.04781327756765945	0.1617867195328671	True	45911330,45911309,45912002,45912343,45912406,45913987,45915107,45918761,45919290,45920264,45920796,45922323	19_45912406_G_A;19_45912343_A_G;19_45912002_A_C;	19_45911329_AT_A;		19_45913987_T_C;	19_45911309_C_A;19_45911329_AT_A;			0.150990099009901	19	1	45909467	45914024
ENSG00000119280	ENSG00000119280	SSSLDALGPTR	Q9H425	1_231207407_G_A	rs12075272	0.09920718799260778	0.0004918047234629012	14.0	2.890176275477774e-08	-1.3320158540889706	0.5478051450099546	-0.12055519011052285	0.13754699620286556	-0.2758254513570097	0.012012719253119421	-0.39140375611405626	False	231207407								0.04950495049504952	1	-1	230972865	231005335
ENSG00000119321	ENSG00000119321	TILGTIMNTIK	A0A0A0MT60	9_115978429_T_G	rs114763479	0.031916072282157225	7.165326176042865e-05	21.0	9.637153398134837e-09	-1.0074366253872338	0.9399103237726008	0.008673138826217121	0.04057865589417469	-0.4395550032060396	0.5038653083024094	-0.07410588608210174	False	115978429,115979783,115980699,115982132,115987035,115990150,115990890,115991847,116000241,116011476,116011665,116012063,116015939,116018011,116019976,116020441,116021968,116022236,116032861					9_115982132_T_C;9_115980699_C_T;9_115979783_C_A;9_115978429_T_G;			0.08663366336633663	9	-1	115923286	115983641
ENSG00000119383	ENSG00000119383	QPPPDSSEEAPPATQNFIIPK	Q15257	9_131871927_A_G	rs10988209	0.07484742338299454	0.00033202116904369446	14.0	1.3729251556308338e-06	0.4416088575827288	1.038740293769149e-06	0.3361271822187888	0.0005002455374733706	0.23195435298364456	7.2959438221200625e-06	0.25771229749421165	False	131871927,131838821								0.20297029702970296	9	1	131873229	131911225
ENSG00000119471	ENSG00000119471	LLGTIYTAAEEIEAVGGK	Q6YN16	9_114941591_G_A	rs28505801	0.08036896715698892	0.0002123746190479245	24.0	9.929678137475584e-06	0.4001720213100636	0.0020026116426410164	0.2633475615863609	0.0002686233244925329	0.3092148482182451	2.109115156332806e-08	0.4766952086124273	False	114941591,114929971,114930574,114931747,114935848,114935976,114936325,114936478,114937659,114938202,114938644,114938931,114939596,114941593,114942200,114943915,114944506,114945705,114947829,114950598,114951172,114952414,114953536								0.4306930693069307	9	1	115142217	115234690
ENSG00000119688	ENSG00000119688	FLELAGLSNLVAR	O14678	14_74759006_C_T	rs3742801	0.028469749645633324	0.00043719251779222336	3.0	1.788293284785169e-07	0.7856914088061778	2.5513782482421425e-05	0.4727680368621138	2.5432496166592225e-13	0.6017085409473338	0.0005458789646986003	0.2304059181376199	False	74759006,74730468,74731438,74731500,74732119,74734614,74736206,74736309,74740664,74744102,74745247,74747057,74747524,74748734,74749769,74754238,74759301,74759477,74760383,74761584,74762798,74765893,74766352,74767863,74769249,74769841,74769977,74772401,74774031,74774044,74776357,74777085,74777525,74778475,74781974,74783138,74786538,74787002,74789565,74790211,74799143	14_74759477_C_T;14_74759006_C_T;	14_74754238_CAG_C;		14_74759477_C_T;14_74759301_G_T;	14_74769249_A_G;14_74765893_C_A;14_74762798_C_T;14_74761584_A_G;14_74760383_C_T;14_74754238_CAG_C;	14_74761584_A_G;14_74760383_C_T;14_74759477_C_T;14_74759301_G_T;14_74754238_CAG_C;14_74759006_C_T;	14_74766352_A_G;14_74759301_G_T;	0.3712871287128713	14	-1	74752126	74769759
ENSG00000119720	ENSG00000119720	VFDTALGMAGSR	Q9H7Z3	14_90573829_T_A	rs8004861	0.09472344827258093	0.00040374548880014327	16.0	1.1747552190542075e-05	-0.7239389805087529	0.4517313363632748	0.08789307709927208	0.21833522745423506	-0.17402445467263966	0.775648330505917	-0.01879023594246921	False	90573829,90560777,90561735,90568027,90568097,90568249,90574052,90578974,90579372,90580303,90582517,90583794,90585644,90585915,90585920,90587246,90587281,90587757								0.2549504950495049	14	-1	90742580	90798481
ENSG00000119723	ENSG00000119723	VALIGDAAHR	A0A0D9SFJ1	14_74531015_T_A	rs6574159	0.030214750206334483	0.00015667175329358551	9.0	3.3836836857312503e-07	-0.7790414238263246	0.0393469791011536	-0.32246809696851475	0.0027049546560607416	-0.4865169222702498	4.505227385469265e-07	-0.5328110470329748	False	74531015								0.16831683168316833	14	1	74416629	74430373
ENSG00000120254	ENSG00000120254	GGAAGGGYAQVIPMEEFNLHLTGDIHAITAAN	A0A087WVM4	6_151533907_C_T		0.027316355557385368	3.277281405239801e-05	38.0	6.012390092187618e-07	-1.1714738444775048	0.3928285873065258	-0.10594560564043264	0.11847010955278113	-0.08526624676881013	0.7831422140784636	-0.020378915120581702	False	151533907								0.1113861386138614	6	1	151186685	151423023
ENSG00000120314	ENSG00000120314	AVAFSEDGQK	Q9H6Y2	5_140126132_A_T	rs57127635	0.0060073641724718106	1.7431923080344793e-05	12.0	2.343126426275371e-09	-0.5940264093509845	0.0002346371160935065	-0.4132709266849912	0.00015901324840930206	-0.2944674196870433	0.0003441566735897089	0.2895957233852726	False	140126132,140029373,140030741,140037460,140045462,140045994,140047600,140048544,140054257,140058893,140061761,140061822,140063891,140070104,140072409,140072811,140073883,140082677,140083744,140086364,140088477,140089483,140095459,140095559,140096323,140096379,140097096,140097951,140098596,140107231,140108670,140109646,140110242,140111764,140111930,140113097,140114987,140115203,140115534,140117032…	5_140048544_C_T;	5_140045462_T_TA;		5_140048544_C_T;	5_140047600_C_T;5_140045994_C_G;5_140045462_T_TA;	5_140048544_C_T;5_140047600_C_T;5_140045994_C_G;5_140045462_T_TA;		0.2623762376237624	5	1	140044261	140053709
ENSG00000120539	ENSG00000120539	ILGTPDYLAPELLLGR	Q96GX5	10_27438713_T_A		0.001194797920961224	1.5512214242466529e-06	20.0	2.1121942401137127e-09	-0.6578971909844118	5.5367709380401495e-09	-0.4944672241560761	5.071461234510696e-28	0.2561102158966693	2.496459672492525e-31	1.1555900766686609	False	27438713,27363041,27364894,27368126,27371126,27371623,27371647,27373198,27376619,27377282,27382240,27384160,27384247,27384357,27386726,27389548,27393142,27399117,27405331,27405969,27406854,27414778,27416747,27420185,27423510,27425021,27426775,27434968,27436295,27438284,27439160,27443623,27444303,27444328,27444763,27445196,27445574,27450684,27450822,27452553,27452867,27453031,27454111,27455902,274…		10_27474715_CA_C;10_27460501_TA_T;10_27455902_GATATGTAATTCTTAATACATATTA_G;10_27452867_C_CATTT;		10_27475693_T_C;10_27475494_T_C;10_27444328_C_A;10_27444303_G_A;	10_27475010_C_T;10_27474715_CA_C;10_27474288_G_A;10_27474078_A_G;10_27473901_A_G;10_27473624_G_T;10_27469678_G_T;10_27469503_T_A;10_27469165_T_A;10_27469101_T_C;10_27468762_T_C;10_27467495_C_T;10_27467486_G_A;10_27467010_A_G;10_27466970_A_C;10_27466473_G_A;10_27466165_C_A;10_27465828_G_A;10_27464370_T_C;10_27463655_A_G;10_27463236_A_G;10_27463114_C_T;10_27463012_G_A;10_27461953_T_A;10_27460501_TA…		10_27475444_T_C;10_27459670_C_T;	0.349009900990099	10	1	27443753	27475853
ENSG00000120675	ENSG00000120675	EAGLILGVSPSAGK	Q9Y5T4	13_43597706_C_T	rs17553284	7.598571646856826e-05	3.636985352091337e-07	4.0	5.361493524402215e-14	-0.978464257149646	2.0683308539437995e-16	-0.9675037243519404	4.32022676870151e-33	-1.4176505236014807	2.5808957333227266e-35	-1.4218674192939225	False	43597706,43597865,43597932,43597977,43597980,43597995,43598189,43598191,43598322,43598412,43598566,43598575,43598707,43598844,43598958,43599057,43600228,43600811,43604134,43604332,43607186,43607650,43608939,43612074,43613458,43616214,43616973	13_43597865_A_G;	13_43604134_AAAG_A;13_43600811_CAATG_C;		13_43597706_C_T;	13_43616973_T_A;13_43616214_T_G;13_43613458_A_T;13_43612074_A_G;13_43608939_G_T;13_43607650_A_G;13_43607186_A_G;13_43604332_T_A;13_43604134_AAAG_A;13_43600811_CAATG_C;13_43600228_G_A;13_43599057_T_C;13_43598958_C_T;13_43598844_C_A;13_43598707_G_C;13_43598575_T_G;13_43598566_G_T;13_43598412_G_A;13_43598322_C_G;13_43598191_A_G;13_43598189_A_T;13_43597995_G_T;13_43597980_G_A;13_43597977_C_G;13_43597…			0.2995049504950495	13	1	43597339	43683045
ENSG00000120860	ENSG00000120860	IQQIETTLNILDAK	F5GZ97	12_102531684_C_G	rs11111174	0.0018021429482973587	7.208695018745312e-06	7.0	1.0121629665290012e-09	-0.5736838262177475	7.155880121442276e-09	-0.6149989764935846	2.3182991196697424e-10	-0.7295017359611117	1.0481007089383258e-14	-0.8169262932958153	False	102531684,102394872,102399354,102412499,102412703,102415256,102420892,102421344,102424383,102428444,102429442,102437117,102440082,102440246,102441002,102441525,102442201,102442598,102442944,102444999,102446675,102452264,102455729,102461089,102462412,102463140,102463456,102463532,102466028,102476087,102478694,102483273,102483822,102489302,102491238,102491983,102492558,102497698,102499032,102499628…		12_102429442_CAT_C;12_102412703_G_GTAGCTGGTATTAC;			12_102452264_C_A;12_102446675_T_G;12_102444999_G_T;12_102442944_A_C;12_102442598_C_T;12_102442201_A_G;12_102441525_G_T;12_102441002_C_T;12_102440246_C_T;12_102437117_G_A;12_102429442_CAT_C;12_102428444_T_C;12_102424383_A_T;12_102421344_A_C;12_102420892_T_A;12_102415256_T_C;12_102412703_G_GTAGCTGGTATTAC;12_102412499_T_C;	12_102455729_G_A;12_102452264_C_A;12_102446675_T_G;12_102444999_G_T;12_102442944_A_C;12_102442598_C_T;12_102442201_A_G;12_102441525_G_T;12_102441002_C_T;12_102440246_C_T;12_102437117_G_A;12_102429442_CAT_C;12_102428444_T_C;12_102424383_A_T;12_102421344_A_C;12_102420892_T_A;12_102415256_T_C;12_102412703_G_GTAGCTGGTATTAC;12_102412499_T_C;	12_102455729_G_A;	0.20297029702970296	12	-1	102406705	102455927
ENSG00000120915	ENSG00000120915	DLGMVTILVQDTDTALK	P34913	8_27402494_C_T	rs4149259	2.234491699941513e-05	2.559205181218164e-08	14.0	1.4260850226909506e-12	0.8751838841904158	2.1520291897937528e-16	0.9322810025734758	7.346638635595981e-15	0.7976884554795808	1.273713573575553e-28	1.0023656445558289	False	27402494,27347401,27351219,27354471,27354611,27355130,27363136,27365430,27371546,27372189,27373923,27378633,27381194,27382504,27385415,27385450,27387230,27387392,27387584,27388199,27388320,27388345,27389457,27389542,27390192,27391191,27391620,27392986,27393066,27393220,27394724,27394957,27395249,27396111,27396523,27397157,27402664,27404137		8_27387584_CT_C;8_27382504_GA_G;	8_27373923_T_C;	8_27402664_G_A;8_27402494_C_T;	8_27397157_T_C;8_27396523_T_C;8_27396111_G_T;8_27395249_T_C;8_27394957_C_A;8_27394724_G_C;8_27393220_T_G;8_27393066_G_A;8_27392986_C_T;8_27391620_G_C;8_27391191_A_C;8_27390192_G_A;8_27389542_T_C;8_27389457_G_A;8_27388345_A_T;8_27388320_C_G;8_27388199_G_A;8_27387584_CT_C;8_27387392_C_T;8_27387230_C_G;8_27385450_A_G;8_27385415_C_T;8_27382504_GA_G;8_27381194_G_C;8_27378633_T_C;8_27373923_T_C;8_27372…			0.150990099009901	8	1	27348296	27403081
ENSG00000121274	ENSG00000121274	VGSQDVSLESSQAVGK	H3BQM0	16_50409437_C_T	rs12445082	0.041156193455082736	0.0001295826660628054	16.0	7.790322645501674e-07	-1.12229973924922	0.6786290508068729	-0.05616415947353515	0.3102316383556704	0.03368485360954819	0.8612262764263646	0.014468240580679059	False	50409437,50423421								0.10643564356435643	16	1	50186829	50269221
ENSG00000121988	ENSG00000121988	SGQLFCSPILALEEITK	Q5FWF4-3	2_136041662_G_C	rs60989085	0.04050107234334496	0.00015599912011043192	13.0	2.2826159674944512e-08	-1.095353833690802	0.00012111264227547068	-0.6452541231503649	2.772765355125432e-17	-0.9248751348038826	1.735866327940847e-16	-1.002688463042138	False	136041662,135766890,135778708,135779588,135800085,135931877,135932720,135933317,135933921,135934842,135939824,135941503,135941816,135943900,135945474,135947116,135949715,135952376,135956745,135958693,135958853,135958940,135962864,135963304,135964572,135965376,135966184,135967778,135969264,135971806,135972093,135973768,135975598,135976498,135980201,135980802,135981130,135981554,135988127,135988186…	2_135988416_C_T;2_135988127_T_A;	2_136286434_G_GATCT;2_136277652_CT_C;2_136277652_CTT_C;2_136267807_GG_G;2_136191407_TA_T;2_136168343_GA_G;2_136168332_ATCAACAAGGAGAAA_A;2_136168330_GAATCAACAAGGAGA_G;2_136107322_TA_T;2_136092331_GGC_G;2_136088256_CT_C;2_136020193_CAT_C;2_136016881_C_CAA;2_136002361_GA_G;2_135969264_A_AGGAT;		2_135988416_C_T;2_135988186_G_A;2_135988127_T_A;2_135965376_T_C;2_135956745_G_A;	2_136286434_G_GATCT;2_136277652_CT_C;2_136277652_CTT_C;2_136277304_T_C;2_136275985_T_C;2_136272074_A_T;2_136267808_G_A;2_136267807_GG_G;2_136266241_G_C;2_136265187_T_A;2_136254419_G_A;2_136251329_C_G;2_136250285_C_T;2_136249245_A_G;2_136244171_A_G;2_136232572_A_G;2_136230082_A_C;2_136229598_G_A;2_136229438_A_C;2_136228929_G_C;2_136226626_C_T;2_136221500_C_A;2_136219999_C_T;2_136217980_C_T;2_13620…	2_136286434_G_GATCT;2_136277652_CT_C;2_136277652_CTT_C;2_136277304_T_C;2_136275985_T_C;2_136272074_A_T;2_136267808_G_A;2_136267807_GG_G;2_136266241_G_C;2_136265187_T_A;2_136254419_G_A;2_136251329_C_G;2_136250285_C_T;2_136249245_A_G;2_136244171_A_G;2_136232572_A_G;2_136230082_A_C;2_136229598_G_A;2_136229438_A_C;2_136228929_G_C;2_136226626_C_T;2_136221500_C_A;2_136219999_C_T;2_136217980_C_T;2_13620…	2_135988186_G_A;2_135965376_T_C;	0.10643564356435643	2	-1	135894486	136288806
ENSG00000122566	ENSG00000122566	KLFIGGLSFETTEESLR	P22626	7_26069083_T_A	rs4719853	0.0004387478897400895	3.150038696231347e-07	32.0	1.8295265901971146e-06	1.0488039993696932	0.01265432436950333	-0.22484381827911104	0.09495746277500433	0.15314798218281825	0.25570729156147864	-0.08158860304819084	True	26069083								0.2475247524752475	7	-1	26229547	26241149
ENSG00000122971	ENSG00000122971	ELFPIAAQVDK	P16219	12_121130046_A_G	rs7306541	0.004001570839923539	1.3886030197173941e-05	9.0	2.1331318695076812e-10	-0.5301011327063243	4.424051142646247e-07	-0.5086995032570201	0.02448444145198911	0.19656972867809352	0.0016832043389368243	0.22602729073784786	False	121130046,121140064,121140319,121141458,121144716,121152017,121152667,121154000,121155622,121156496,121160615,121162637,121167387,121171891,121175524,121176083,121177272,121180019,121185145	12_121176083_G_A;		12_121176083_G_A;	12_121177272_G_C;	12_121175524_T_C;12_121171891_G_A;12_121167387_C_T;			0.2623762376237624	12	1	121163538	121177811
ENSG00000123213	ENSG00000123213	MEMAFNTR	Q9BYT8	5_65180643_C_T	rs56816066	1.8833619073945675e-05	7.552719245459427e-09	37.0	3.536835540249212e-05	1.7123945073205884	0.2262610429653944	-0.1693744017194292	1.4072807339787408	0.15625534034462255	0.9855276961542688	-0.0015042870408293293	False	65180643,65169979,65170390,65170478,65171507,65171582,65172890,65172991,65173937,65174224,65174363,65174899,65175083,65175888,65175905,65175951,65177152,65177258,65179221,65180638								0.12128712871287127	5	1	65018023	65167553
ENSG00000123297	ENSG00000123297	DQLALAIGK	P43897	12_58124992_T_G	rs10877011	0.00010358144620832941	1.1738389683562939e-07	17.0	1.977645402557683e-11	-0.541937168202719	4.063816389215393e-15	-0.7521474791497464	9.09589798998804e-26	-0.6863060391495627	4.9620195384701326e-23	-0.5996541510859241	False	58124992,58117645,58124534,58129302,58139253,58142854,58144665,58146719,58157988,58161898,58162085,58162739,58165085,58166403,58167193,58167661,58167788,58167992,58169361,58170335,58170556,58171726,58172929,58173448,58173466,58174306,58175201,58176614,58177379,58177437,58177943,58178148,58178162,58178589,58180416,58182050,58182312,58186594,58187758,58188157,58188696,58193448,58196447,58196528,581…		12_58177379_CT_C;	12_58177437_C_T;	12_58196528_G_A;12_58196447_G_A;12_58177943_G_A;12_58176614_T_C;	12_58196802_A_G;12_58196528_G_A;12_58196447_G_A;12_58193448_T_C;12_58188696_G_C;12_58188157_T_C;12_58187758_G_T;12_58186594_C_T;12_58186594_CA_TG;12_58182312_C_T;12_58180416_G_C;12_58178589_A_G;12_58178162_A_G;12_58178148_G_A;12_58177943_G_A;12_58177437_C_T;12_58177379_CT_C;	12_58178589_A_G;12_58178162_A_G;12_58178148_G_A;12_58177943_G_A;12_58177437_C_T;12_58177379_CT_C;12_58176614_T_C;	12_58176614_T_C;	0.3118811881188119	12	1	58176372	58201854
ENSG00000123384	ENSG00000123384	GTNVCAVANGGCQQLCLYR	Q07954	12_57453203_T_C	rs56190972	0.03875124932955548	1.6356713952719455e-05	117.0	2.4004554399588397e-08	-1.1477154090182498	0.4253268858395304	-0.12692607628290187	1.1737038725337845	-0.3603962297330438	0.2677032904591535	-0.10828249526157736	True	57453203								0.054455445544554455	12	1	57522276	57607134
ENSG00000123684	ENSG00000123684	ETSQAFAK	Q92604	1_211849005_T_G		0.06813775917021586	0.0006572613881237352	6.0	0.00016305483111094153	1.0254713254554555	0.2830424998604705	0.16804085975543753	0.4747575533305349	0.13568266599696466	0.5483398187770789	0.05682050024004792	False	211849005								0.12623762376237624	1	-1	211916799	212004114
ENSG00000124181	ENSG00000124181	GVLDVPACQIAIRPEGK	P19174	20_39826079_T_C	rs56668103	0.0274769583040228	2.6176584375087445e-05	48.0	6.328104035514647e-07	0.37223843453452776	0.00554120473354969	0.2714202798171224	0.017374882957094575	0.09823383765776383	0.971989354777938	0.0019842223570468425	True	39826079,39782899,39783034,39808400,39808660,39815512,39816385,39819871,39820749,39821898,39823175,39845070,39846859,39849663,39862471,39883803,39885529,39887648,39891808,39892352,39907749,39908600,39910582,39914030,39920014,39921146,39923543,39923621,39924630,39929608,39934026,39940004,39952649,39958154,39959119,39961397,39964330					20_39808660_G_T;20_39808400_G_A;20_39783034_C_A;20_39782899_A_G;	20_39808660_G_T;20_39808400_G_A;		0.2326732673267327	20	1	39765600	39811629
ENSG00000124228	ENSG00000124228	AGPSFEER	B7Z6D5	20_47676281_G_A	rs6066959	0.053694041007612034	7.848550987805198e-05	36.0	8.774079974993948e-10	-1.2158706783809836	0.6162533833770585	0.03214340014761241	0.09818433270837723	-0.04146269056964892	0.6819443275269614	-0.02303685818604093	False	47676281,47523865,47526493,47527742,47529913,47530037,47530150,47530801,47530924,47531606,47532999,47533655,47535298,47541600,47543604,47549979,47551632,47554392,47555536,47568658,47571551,47573598,47578606,47580699,47582958,47598497,47599205,47599690,47621372,47623420,47623827,47625544,47627170,47635715,47639464,47640466,47645427,47646210,47646321,47647068,47648353,47648854,47653364,47654258,476…	20_47859217_G_A;		20_47859217_G_A;		20_47843146_A_T;20_47841139_A_T;			0.4084158415841584	20	1	47835884	47860614
ENSG00000124243	ENSG00000124243	LEEFCSLADLIR	Q8TDM0-2	20_49315787_G_A	rs6020704	0.06256235351113187	0.003488579243291546	1.0	0.0012574521329852956	1.1031413229148277	0.729261243415917	0.11372103687979572	0.3558351452880837	0.15474164363247386	0.33595933730338906	0.05931039828655563	False	49315787,49321555,49324381								0.16336633663366334	20	1	49411431	49493714
ENSG00000124299	ENSG00000124299	YAVDDVQYVDEIASVLTSQK	P12955	19_33910831_C_T	rs61627965	0.07366129750870541	0.0002144818602423316	21.0	1.8685059317530442e-07	-0.4165251042785307	1.839964122339268e-07	-0.4900973975728471	3.137120649616491e-05	-0.4739176112144248	1.608952039147753e-07	-0.5950523972362259	False	33910831,33905530,33906636,33908493,33910026,33911915,33914440,33915900,33917799,33917811,33918314,33919090,33919445,33919877,33920158,33921388,33921542,33922096,33925533,33926991,33928743,33933312,33939614,33953831,33957674,33957675,33966453,33967636,33989245,33995797,34012861		19_33957675_AGAAAT_A;19_33933312_CA_C;19_33915900_AAACAAAC_A;			19_33995797_C_T;19_33989245_G_A;19_33967636_C_T;19_33966453_T_C;19_33957675_AGAAAT_A;19_33953831_T_C;19_33939614_G_A;19_33933312_CA_C;19_33928743_T_C;19_33926991_G_C;19_33925533_G_A;19_33922096_G_A;19_33921542_A_C;19_33921388_G_A;19_33920158_C_T;19_33919877_T_C;19_33919445_C_T;19_33919090_T_C;19_33918314_C_T;19_33917811_G_A;19_33917799_C_T;19_33915900_AAACAAAC_A;19_33914440_G_A;19_33911915_G_A;19…	19_33967636_C_T;19_33966453_T_C;19_33957675_AGAAAT_A;		0.15594059405940594	19	-1	33877856	34012700
ENSG00000124370	ENSG00000124370	DSPIAGFLQK	Q96PE7	2_71349061_C_T	rs76497479	0.05822803676823037	0.0015824981618483044	2.0	3.0733583133052715e-07	-1.1702183365527483	0.06420737936921052	-0.2611543617965936	0.08476117222795201	-0.3633877123956014	0.011879256044779178	-0.3125133118750145	False	71349061,71367198					2_71349061_C_T;			0.09158415841584157	2	-1	71336814	71357369
ENSG00000124587	ENSG00000124587	VVQEGDVLCVPTIGQVEILEGSPEK	Q13608	6_42932200_G_T		1.3023277184488216e-07	6.623061868382783e-11	16.0	2.0853054164608828e-14	0.8461517760612557	3.4100421274053006e-20	0.9641002457981264	3.573086499989884e-39	1.2020521132998188	3.052958645117073e-40	1.2381793990605794	True	42932200,42915920,42918984,42925683,42926477,42928017,42928461,42931224,42935685,42937126,42937176,42940235,42940365,42942779,42943098,42944850,42946490,42946943	6_42932200_G_T;	6_42935685_C_CT;	6_42942779_A_G;	6_42946943_G_A;6_42932200_G_T;	6_42944850_C_T;6_42943098_T_C;6_42942779_A_G;6_42940365_G_A;6_42940235_G_A;6_42937176_C_A;6_42937126_C_T;6_42935685_C_CT;		6_42946490_C_A;	0.4232673267326733	6	-1	42931608	42946958
ENSG00000124588	ENSG00000124588	EEPIPCTAHWHFGQ	P16083	6_2996321_C_G		2.4417990890328976e-10	9.642140712945508e-14	10.0	6.569266680461669e-20	-0.8909268457865525	3.882447054844142e-22	-0.9066599650066928	1.6228786107846318e-12	-0.8276395029965573	4.541260518821813e-08	-0.5838436751928483	False	2996321,2993935,2997650,2999328,2999371,2999729					6_2999729_A_G;6_2999371_A_G;6_2999328_A_G;6_2997650_A_G;6_2993935_G_A;6_2996321_C_G;			0.4108910891089109	6	1	2988221	3019996
ENSG00000124767	ENSG00000124767	ATLELTHNWGTEDDETQSYHNGNSDPR	Q04760	6_38650628_T_G		2.2345449275437246e-13	3.862242439215085e-17	9.0	6.673758053661067e-26	-0.965400295483368	8.413976524491068e-08	-0.3140903304219789	0.36945380902247177	-0.11621012034536796	0.15986490919154242	-0.07388905185198033	False	38650628,38632703,38634743,38636865,38642371,38647852,38656195,38656329	6_38650628_T_G;				6_38656329_G_A;6_38647852_G_C;			0.452970297029703	6	-1	38643701	38670917
ENSG00000124831	ENSG00000124831	LTAEDDALNQIAR	Q32MZ4	2_238509324_G_A	rs10929237	5.933724275858639e-06	2.761229437132575e-09	27.0	1.488378813150742e-11	-0.8284042943206398	4.309918728501258e-06	-0.5061968404917403	6.462421028379003e-08	-0.4758023055734942	1.4755752474875171e-18	-0.579810507483018	False	238509324,238504820,238506581,238509820,238509907,238511168,238511712,238512217,238512808,238512888,238513278,238515227,238516458,238517644,238517956,238518545,238518928,238520612								0.2103960396039604	2	1	238536219	238722325
ENSG00000124839	ENSG00000124839	DLEEELHPGEVLVMLVGNK	Q9H0T7	2_238516458_T_C	rs150313033	0.005068323781200348	1.661745502032901e-05	10.0	2.8331626366075767e-08	0.7443915352960178	1.1407248613191148e-11	0.7178755089413974	2.096327797010208e-13	0.7798641138084157	6.7901781375994274e-15	0.7591146679394107	False	238516458,238504820,238506581,238509324,238509820,238509907,238511168,238511712,238512217,238512808,238512888,238513278,238515227,238517644,238517956,238518545,238518928,238520612								0.2103960396039604	2	-1	238482965	238510257
ENSG00000125166	ENSG00000125166	IPEQSVLLLHACAHNPTGVDPRPEQWK	P00505	16_58931039_A_T	rs74983593	0.00019240225728330682	1.2699720919856813e-07	31.0	6.118418014604419e-12	-1.3921991258245423	0.07895992907655762	-0.2889069033124709	0.15722841910415658	-0.33278965836937663	0.0918118007110062	-0.2479498502564285	False	58931039								0.07178217821782178	16	-1	58741035	58768261
ENSG00000125375	ENSG00000125375	DYNHLPTGPLDK	Q99766	14_50802727_A_C	rs7148089	0.002720342145466821	1.1532587772026386e-05	7.0	1.7118925323322027e-08	0.5958548613607643	3.0255965588174497e-15	0.6907410774485203	0.003565374132650615	0.27770580594236666	0.004669771401105942	-0.1870801353015301	False	50802727,50714274,50714985,50722359,50726304,50727010,50727109,50727219,50727483,50728736,50729250,50732947,50734100,50736725,50739485,50740191,50740605,50740700,50743180,50743732,50745123,50746096,50747337,50748853,50749924,50750316,50750577,50751199,50751565,50753242,50753992,50754681,50755671,50755991,50756089,50757095,50757131,50759678,50761847,50765758,50768483,50769327,50769455,50769717,507…	14_50798743_G_A;14_50788213_C_T;14_50786004_A_G;	14_50801832_CCTGT_C;14_50800247_A_AT;14_50790832_AAGGTAGATGATCAAAGCCAAAGTGGAAACTTGATAATGCTGTTAAGGTGAATAGTTAGAATTTAATTGACTGTGAGGGGTGGTGTCTTTTTTTAGTTCTAAAAAAGATAATTTTAAAAAATGACCTCACTTTCATCTGTAATATTTTAAAACAGCTAAAATGATCAACCTTAATACATTAATGTTGTATTGAATTTTTTATAGAGTATATTTTAAAAAATTAAATCTACATTAAGCACCTAGCATGGTGCCTGCCACAGTAAGCCCTCAGTAAGCATCAACGATTATGCTTTCTCTCCTTTTTTTTTAAAGCAGTTTCTCCTATGGTTTTAATATTTTCAAGACATTTG…	14_50790832_AAGGTAGATGATCAAAGCCAAAGTGGAAACTTGATAATGCTGTTAAGGTGAATAGTTAGAATTTAATTGACTGTGAGGGGTGGTGTCTTTTTTTAGTTCTAAAAAAGATAATTTTAAAAAATGACCTCACTTTCATCTGTAATATTTTAAAACAGCTAAAATGATCAACCTTAATACATTAATGTTGTATTGAATTTTTTATAGAGTATATTTTAAAAAATTAAATCTACATTAAGCACCTAGCATGGTGCCTGCCACAGTAAGCCCTCAGTAAGCATCAACGATTATGCTTTCTCTCCTTTTTTTTTAAAGCAGTTTCTCCTATGGTTTTAATATTTTCAAGACATTTGGTATATACCTATTAGCATTTTACTGTGTAATTATTTT…	14_50789578_G_C;14_50779346_C_T;14_50779345_CC_CTCGCCCCGCCCT;14_50779229_C_T;	14_50801832_CCTGT_C;14_50801102_G_A;14_50800833_A_T;14_50800618_T_A;14_50800502_A_G;14_50800247_A_AT;14_50800247_A_T;14_50799711_C_T;14_50799643_G_C;14_50799338_T_C;14_50799126_G_C;14_50798665_C_T;14_50798515_C_T;14_50797893_G_A;14_50797822_A_G;14_50797527_A_G;14_50795490_G_A;14_50795177_C_T;14_50793814_G_A;14_50792273_A_G;14_50790832_AAGGTAGATGATCAAAGCCAAAGTGGAAACTTGATAATGCTGTTAAGGTGAATAGTTAGAAT…			0.4257425742574257	14	1	50779044	50802276
ENSG00000125877	ENSG00000125877	IVFVTGNAK	Q9BY32	20_3387785_C_T	rs6139117	3.893001431744469e-09	2.049683654382633e-12	10.0	1.4519005165244724e-15	-0.8811201987823392	1.5468696208789678e-16	-0.941343796602172	3.65552348805248e-09	-0.6883399126616914	2.0623102487566482e-06	-0.469491372506022	False	3387785,3213852,3214581,3223713,3224819,3227845,3228423,3233943,3235494,3237232,3240723,3240970,3244098,3246418,3247922,3248760,3249020,3250007,3251248,3251924,3252242,3252347,3253143,3253831,3255905,3257194,3258188,3258874,3259142,3259165,3260368,3261006,3261068,3262493,3262824,3263636,3263685,3264267,3264292,3264438,3265029,3265779,3266327,3266548,3267133,3267736,3267911,3268817,3270370,3270621…								0.18811881188118806	20	1	3189514	3204516
ENSG00000126522	ENSG00000126522	VAEEWAQGTFK	P04424	7_65658569_T_C		0.0076468595936092015	1.3679616001490675e-05	20.0	8.229219816812738e-07	-0.3834390329898181	2.801685470091687e-05	-0.2989476634416226	1.1446624173409474e-08	-0.51456184514363	9.003676634851503e-08	-0.3938351455997497	False	65658569								0.2524752475247525	7	1	65540785	65558545
ENSG00000126602	ENSG00000126602	EWQHEEFYR	Q12931	16_3724465_G_C	rs13926	6.42609949290529e-17	1.6625905437177548e-21	37.0	1.9338292192200799e-28	-1.0725699088105782	0.22854310697494845	-0.08894401023329834	8.730953661162128e-12	-0.16618307771767712	0.0013694019592419098	0.1955028357071021	True	3724465,3710955,3711017,3723046,3747204	16_3724465_G_C;	16_3710955_TG_T;16_3710954_GT_G;		16_3724465_G_C;	16_3747204_C_T;16_3723046_C_G;16_3711017_A_T;16_3710955_TG_T;16_3710954_GT_G;	16_3747204_C_T;16_3723046_C_G;16_3711017_A_T;16_3710955_TG_T;16_3710954_GT_G;16_3724465_G_C;		0.405940594059406	16	-1	3701640	3767598
ENSG00000126870	ENSG00000126870	SFVPLLDSK	Q8WVS4	7_158656809_T_A	rs844523	0.00020913298012853728	2.752737563017722e-07	16.0	2.123892028698895e-11	-1.2209757608128329	1.1475285671958458e-16	-1.0209905361087903	8.517287033756657e-14	-0.6430098314727788	1.3532123014914385e-08	-0.5355345910837442	True	158656809,158651087,158651731,158655534,158659020,158660923,158660977,158662840,158663053,158663242,158665221,158665987,158667179,158667437,158669037,158671116,158674521,158675425,158676289,158685496,158686337,158686626		7_158676289_T_TAGAA;7_158663053_CTT_C;7_158659018_CTT_C;			7_158686626_T_A;7_158686337_C_T;7_158685496_G_A;7_158676289_T_TAGAA;7_158675425_A_G;7_158674521_C_G;7_158671116_G_A;7_158669037_A_G;7_158667437_C_T;7_158667179_C_T;7_158665987_C_T;7_158665221_T_G;7_158663242_C_G;7_158663053_CTT_C;7_158662840_A_G;7_158660977_G_T;7_158660923_C_T;7_158659020_T_C;7_158659018_CTT_C;7_158655534_T_C;7_158651731_A_G;7_158651087_G_A;7_158656809_T_A;	7_158686626_T_A;7_158686337_C_T;7_158685496_G_A;7_158676289_T_TAGAA;7_158675425_A_G;7_158674521_C_G;		0.19801980198019808	7	1	158649269	158749438
ENSG00000126878	ENSG00000126878	YSDEENLPEK	Q9BQI0-3	9_133929081_G_A	rs10751514	0.08859420783141753	0.0011637093762252872	5.0	5.151813640834834e-06	-0.3862779207977773	0.0003819588370545794	-0.31430287951533176	1.0668372977540128e-10	-0.4452194859908614	2.3153753497047092e-11	-0.4710332494147324	False	133929081,133919162,133923328,133926164,133927286,133929185,133929201								0.2549504950495049	9	1	133971863	133998539
ENSG00000127054	ENSG00000127054	SCILVSIAGK	A0A087WXT8	1_1187641_C_T	rs74491544	0.023447515458904337	6.07358796702785e-05	17.0	0.0001214977166653614	-0.5348848462183162	1.331216537984385	-0.06126556278478201	0.19394223966772087	-0.20372470401314974	0.6633809262747179	0.04633151893322715	False	1187641,1177918,1183397,1187867,1187993,1188225								0.07178217821782178	1	-1	1246965	1260071
ENSG00000127586	ENSG00000127586	LSDTLHSLR	E7EXA6	16_849166_C_A	rs2272900	3.7971162496937395e-09	6.370128183465373e-13	30.0	3.171204202070634e-16	0.8692417636013737	3.6398075302907374e-19	0.9907297418787862	1.260721414274726e-17	0.7842200773644467	3.190370650309165e-08	0.2954118110269942	False	849166,847597,848575,849452,849890,849894,850205,851191,852137					16_847597_T_C;			0.27722772277227725	16	1	838046	850737
ENSG00000128052	ENSG00000128052	GAFGQVIEADAFGIDK	P35968	4_56011889_C_T	rs12331507	0.004277558008237468	1.1303426989180016e-05	12.0	3.434953184005315e-09	0.6367039485327104	6.225253588134598e-06	0.4216613403982297	2.8321719570351947e-16	0.6829021380312909	6.335336104073901e-17	0.6591472545987598	True	56011889,55993915,55993961,55994210,55994226,55994266,55994314,55995979,55997914,56005526,56006102,56007093,56007249,56007425,56008477,56008969,56009245,56010165,56010771,56019068,56022903								0.28465346534653463	4	-1	55944644	55991756
ENSG00000128059	ENSG00000128059	LIPVSDINDK	Q06203	4_57187415_T_C	rs1401906	0.00838835086796793	1.1774776625446278e-05	26.0	4.711286784233792e-09	-0.24455656770380865	0.0035748114142917314	-0.15139169439949995	0.0001478015228851261	-0.17058407651842286	0.0002614625209907563	-0.2426575049543837	False	57187415,57187665,57187940,57191038,57191078,57192431,57194525,57196155,57197402,57249002								0.4876237623762376	4	-1	57259528	57301781
ENSG00000128335	ENSG00000128335	YFQDQVSR	J3KQL8	22_36611064_C_T	rs12330108	0.05198234758153756	0.0004530390868559674	6.0	1.1177012545748038e-08	-1.3497148093233111	0.003154497851728304	-0.5886103081027927	0.10907012968931426	-0.3818980281866943	0.9071097040687388	0.018848352075666947	False	36611064,36608160,36608390,36610593,36611306,36614412,36616022,36616074,36616200,36616445,36616560,36617901,36620336,36621250,36622822,36622828,36627145,36627521,36630949,36633654		22_36633654_C_CA;22_36627521_AAAG_A;			22_36633654_C_CA;22_36630949_C_T;22_36627521_AAAG_A;22_36627145_T_A;			0.08415841584158416	22	-1	36622256	36636000
ENSG00000128567	ENSG00000128567	TAPTPASSVTIMATDTAQQSTVPTSK	O00592-2	7_131348452_G_A	rs12669099	0.09591589926620507	0.0004117485803727542	16.0	0.00024022992773096083	0.8294918962691836	0.6495796089438106	0.03422389222644732	0.04984099032519885	0.1479437389202406	0.7369077645110134	0.018868038869846792	True	131348452,131348808,131349343,131354246,131359656,131364123,131368505								0.2376237623762376	7	-1	131185021	131242976
ENSG00000128923	ENSG00000128923	SLPDSASPAGSPEVPGPCSSSAGLDLK	Q8NBR6-2	15_59264999_C_T	rs117399007	0.022550853204332044	0.00032522726595978353	3.0	1.345358386161613e-07	-1.7766851477297236	4.801489153762479e-07	-1.09634927471222	0.4285800331073469	-0.1961406072763719	0.02272784430624547	-0.1676790352487718	False	59264999								0.054455445544554455	15	1	59063391	59154099
ENSG00000128928	ENSG00000128928	IPAANILGHENK	A0A0A0MT83	15_40702270_C_G	rs4924464	0.0508755606893369	0.00015505928653318372	17.0	3.2622230718461234e-08	0.5342375998817261	1.7815604333381433e-07	0.5196096279070712	8.965479616900359e-12	0.5531271141435122	2.089112426574129e-06	0.39621446116592696	False	40702270,40695293,40702256,40710723,40714019,40720904,40728036,40728412				15_40728036_C_T;15_40710723_G_A;	15_40720904_G_A;15_40714019_C_T;15_40710723_G_A;15_40702256_T_C;15_40702270_C_G;	15_40720904_G_A;15_40714019_C_T;15_40710723_G_A;		0.2524752475247525	15	1	40697686	40728146
ENSG00000129158	ENSG00000129158	ITGGGGHSAVVTDGGDLFVCGLNK	Q9UGK8	11_18058026_T_C	rs211106	0.04971073411584969	0.00042729301591343016	6.0	2.258008392344945e-07	-0.6868000529648448	0.02972548999685425	-0.2184243073009906	7.715071969485102e-15	-0.6887394454177159	0.0017621567934381587	-0.23047204262263865	False	18058026,17942831,17943664,17943805,17944246,17945400,17946606,17946895,17946939,17946975,17948311,17948537,17949838,17950552,17951472,17952971,17967260,17970805,17973607,17975264,17976121,17977042,17978509,17981047,17983057,17983262,17983271,17984154,17985273,17985489,17988000,17988860,17989895,17990256,17991892,17991992,17994090,17994314,17995679,17997538,17998609,18001940,18002450,18005069,180…		11_18029267_GGGGGTGGGGGAAA_G;11_18027387_AG_A;11_18012319_CT_C;			11_18032538_A_G;11_18029267_GGGGGTGGGGGAAA_G;11_18027388_G_A;11_18027387_AG_A;11_18026663_A_G;11_18024616_A_C;11_18024243_A_G;11_18024119_T_G;11_18022692_G_T;11_18021316_T_C;11_18020825_C_T;11_18018875_A_G;11_18013890_C_T;11_18012337_G_A;11_18012319_CT_C;11_18011564_A_C;11_18005069_C_G;11_18002450_C_T;11_18001940_G_A;11_17998609_T_C;11_17997538_A_G;11_17995679_A_G;11_17994314_G_A;11_17994090_G_C;…	11_18032538_A_G;11_18029267_GGGGGTGGGGGAAA_G;11_18027388_G_A;11_18027387_AG_A;11_18026663_A_G;11_18024616_A_C;11_18024243_A_G;11_18024119_T_G;11_18022692_G_T;11_18021316_T_C;11_18020825_C_T;11_18018875_A_G;11_18013890_C_T;11_18012337_G_A;11_18012319_CT_C;11_18011564_A_C;11_18005069_C_G;11_18002450_C_T;11_18001940_G_A;11_17998609_T_C;11_17997538_A_G;11_17995679_A_G;11_17994314_G_A;11_17994090_G_C;…	11_17981047_C_T;11_17948311_T_C;	0.4232673267326733	11	-1	17809595	18034709
ENSG00000129194	ENSG00000129194	LQGELLPTYTHYLPPGSPTPYNPPLAGAPMPL	O60248	17_7384483_A_C		0.002838098317378725	1.4093703502598666e-05	6.0	2.999711946179066e-06	-0.9845191722135054	0.2814263481805098	-0.15002952535681302	0.19027107199407367	-0.1880135866731049	0.2016192651490069	-0.1115258951218974	False	7384483,7352910,7357864,7358520,7359356,7359557,7361537,7362359,7371268,7371692,7373595,7378946,7379617,7379650,7380004,7380188,7380305,7383082,7383136,7384198,7385204,7386811,7387298,7387973,7388728,7388925,7391282,7391819,7393871,7394341,7395628,7395794,7396049,7396781,7397878,7398512,7398909,7399866,7401903,7402985,7403163,7403216,7403792,7403942,7407327,7407766,7407915,7409924,7411770								0.1485148514851485	17	-1	7491496	7493488
ENSG00000129235	ENSG00000129235	HISEGCVFIYCQVGEK	Q9BRA2	17_6440660_C_T	rs410614	1.000784435936783e-05	2.3152445967186557e-08	6.0	0.00014006992239777138	0.26935658109592003	0.0045169200290058435	0.17349655910596962	0.21720394567428786	0.015546311027553888	0.7660234876518648	-0.015603735635784722	False	6440660,6439527,6441164,6442131,6442749,6443244,6444193,6444676,6445877,6445953,6449085								0.36386138613861385	17	1	6544078	6547861
ENSG00000129347	ENSG00000129347	LQAFGLNPK	Q8N9T8	19_10681823_C_T	rs148172637	0.020900276281283475	4.918496671834889e-05	18.0	2.4404812858167522e-08	-0.5581286148563072	7.741545885023558e-14	-0.5629684931269874	1.0679546062280138e-22	-0.4403779129127404	0.00016427737632219712	0.18173873913174168	False	10681823,10649949,10664632,10667641,10669524,10669732,10676537,10687159	19_10664632_A_G;				19_10676537_C_A;19_10669732_A_G;19_10669524_G_A;19_10667641_G_C;	19_10676537_C_A;		0.2945544554455445	19	-1	10663761	10676713
ENSG00000129484	ENSG00000129484	ALMEACNEFYTR	Q9UGN5-2	14_20803848_C_A	rs61995542	0.01978403137597281	5.86907761306565e-05	14.0	3.942252636009337e-08	-1.179474239049315	0.9804134934810976	0.0044165068038006785	0.6087118122491171	-0.3117278740808052	0.7106549977840007	0.04373994636589201	False	20803848,20774229,20774560,20776832,20779286,20780798,20782370,20785514,20785793,20788159,20789054,20790200,20793307,20793424,20799876,20807183,20809887,20810311,20810735,20812472,20814278,20814753,20816032,20823052	14_20823052_G_A;			14_20823052_G_A;	14_20816032_T_C;14_20814753_G_A;14_20814278_A_G;14_20812472_C_T;	14_20823052_G_A;14_20816032_T_C;14_20814753_G_A;14_20814278_A_G;14_20812472_C_T;		0.08168316831683169	14	1	20811741	20826064
ENSG00000130203	ENSG00000130203	LAVYQAGAR	P02649	19_45412079_C_T	rs7412	0.007145309652646962	1.7955187591909325e-05	14.0	1.3711360075384033e-12	-1.2237166587015784	0.613408623946701	-0.057268317221709435	0.09384380012387056	-0.2742966780594541	0.5201574847160821	-0.04832450030900473	False	45412079,45413233	19_45412079_C_T;							0.09405940594059406	19	1	45409011	45412650
ENSG00000130254	ENSG00000130254	AVKEEGQDPDEIGIELEATSK	Q14151	19_5361125_G_A	rs62105883	0.036260662824030385	0.00011064340098274197	16.0	4.139323868344069e-05	-0.7685044263827647	0.05255119843025205	-0.13028691460580746	1.3681017331087002	-0.08291304431193079	0.6764891551557779	-0.0202178853545584	False	5361125,5359587,5360635,5360643,5361475,5362375,5362632,5362681,5364308								0.2797029702970297	19	-1	5587010	5624057
ENSG00000130303	ENSG00000130303	LQDASAEVER	Q10589-2	19_17516620_C_T	rs28413174	0.076671503436267	0.0012041563750161592	4.0	8.27148658067637e-06	0.5214088064061249	5.0434324954737e-06	0.4270006445716095	2.40585920656089e-07	0.3940291026971853	3.25626326215301e-08	0.4174960246522321	False	17516620,17512230,17512412,17512913,17513926,17517174,17518018,17519487,17521101,17521417,17521691,17522309,17522607,17522869,17525029,17525080,17525420,17525503,17525586,17526531,17528495				19_17513926_G_C;				0.1707920792079208	19	-1	17513748	17516457
ENSG00000130413	ENSG00000130413	VTDFGLAVK	Q9BYT3	11_8520408_G_A	rs7118501	0.07457419248120736	0.0005116174507106883	9.0	9.813974258094966e-07	0.4929574758801056	5.31400391250822e-06	0.3842172668681787	3.607291407906756e-09	0.6450581658925765	0.0029223947880731038	0.3043059208134141	False	8520408,8524933,8539069,8625817					11_8539069_C_T;11_8524933_T_C;11_8520408_G_A;			0.2475247524752475	11	-1	8413418	8615836
ENSG00000130770	ENSG00000130770	EAGGAFGK	Q9UII2	1_28585249_C_T	rs580693	0.023447515458904337	0.0002569578607324771	4.0	6.046325241447962e-07	0.4081632583406474	0.0004354196363264732	0.3516462418161569	1.4388278117773122e-16	0.3904161922388497	9.927846415694695e-07	0.19869650115178272	True	28585249,28576919,28576955,28577048,28577257,28577332,28577473,28578216,28578624,28578825,28578995,28579274,28579717,28580376,28580721,28581461,28583496,28584499,28584592,28585213,28587271,28589235,28589332,28589335,28590270,28590319,28591073,28596084,28598020,28614470								0.3143564356435644	1	1	28562620	28573417
ENSG00000131016	ENSG00000131016	LEHETAVTVSEEVSK	Q02952	6_151660786_T_C		0.005430147415565796	2.260181172787302e-06	80.0	2.1406955462726424e-09	-0.7554764238581804	0.3755767250022168	0.11826341187369205	1.184527761491682e-08	-0.6459216452961678	0.3989490879703213	0.07535087513670635	True	151660786					6_151660786_T_C;			0.1311881188118812	6	1	151561134	151679692
ENSG00000131165	ENSG00000131165	ALSTMDLQK	F8VUA2	16_89931974_C_G	rs9939893	0.0058530106616509646	2.851515476453487e-05	7.0	1.8329889193871887e-07	0.4681189226268687	0.0003263134072418953	0.3312089461937626	8.216072442980824e-05	0.33481567645407057	2.769195162850704e-06	0.31511271349231	False	89931974,89907205,89909401,89912925,89914633,89914934,89915418,89917472,89917537,89919403,89921412,89923412,89932143								0.297029702970297	16	-1	89710839	89724253
ENSG00000131459	ENSG00000131459	GYEFESETDTETIAK	O94808	5_179721688_C_A	rs3749791	0.0019541310440004023	1.8394755948470142e-06	30.0	4.936338125976143e-09	0.5334792448816739	5.135146164596177e-07	0.36212735952948094	5.048258709926253e-08	0.4208048390108575	1.2943206681406045e-09	0.4478989575991823	False	179721688,179720924,179740462,179740640,179741374					5_179741374_C_A;5_179740640_C_T;5_179740462_T_C;			0.4108910891089109	5	-1	179727690	179780387
ENSG00000131778	ENSG00000131778	DLSLGGVLLFPVDDK	Q86WJ1	1_146863973_G_C	rs4424556	2.390087391155933e-07	5.874558687743596e-11	37.0	1.553527909327267e-12	1.0143370300176464	3.047553825695145e-10	1.2044465064631673	1.0914336511438575e-16	0.5018839611900169	0.31678546444638617	0.1573972978902864	False	146863973,146714427,146716351,146718430,146718973,146720160,146721983,146722222,146722484,146724003,146724408,146725281,146726023,146727128,146728863,146729093,146733422,146734483,146736789,146737490,146738107,146741960,146744294,146746248,146750000,146750343,146751140,146753902,146753907,146757923,146758635,146759320,146761478,146765454,146767062,146772062,146773422,146773903,146774116,146774742…	1_146759320_C_G;1_146714427_G_C;	1_146758635_TA_T;1_146758634_AT_A;1_146738107_AG_A;1_146736789_A_AT;1_146734483_C_CT;1_146728863_CTG_C;1_146725281_AG_A;1_146716351_CT_C;		1_146714427_G_C;	1_146767062_A_G;1_146765454_C_G;1_146761478_G_A;1_146758635_TA_T;1_146758634_AT_A;1_146757923_G_A;1_146753907_C_A;1_146753902_G_C;1_146751140_T_C;1_146750343_C_A;1_146750000_A_G;1_146746248_A_G;1_146744294_A_G;1_146741960_A_C;1_146738107_AG_A;1_146737490_G_C;1_146736789_A_AT;1_146734483_C_CT;1_146733422_A_T;1_146729093_A_G;1_146728863_CTG_C;1_146727128_C_T;1_146726023_A_G;1_146725281_AG_A;1_14672…			0.0891089108910891	1	1	146714291	146767443
ENSG00000131941	ENSG00000131941	LELSFVNSDLQMLK	Q8IUC4	19_33619902_C_G	rs6510358	0.04324212932256182	7.547429040879891e-05	29.0	7.180217140450836e-08	-0.3689043052069212	0.008393621986047109	-0.3207867748538278	0.09555534062744764	-0.2803509504701943	0.005370914034748606	-0.21499509576630205	False	33619902								0.2277227722772277	19	-1	33469499	33555794
ENSG00000132182	ENSG00000132182	LDLAAYDQEGR	Q8TEM1	3_13395579_C_A	rs2280084	1.5734180391112831e-10	1.459134833446505e-14	40.0	6.187787337921918e-23	-1.1567920510837144	0.12733834158191545	-0.1142502578067317	0.024629240275116333	-0.12549627286726622	0.0035325715633170796	-0.14577378716322628	False	13395579,13350867,13353619,13354552,13354990,13356901,13358130,13358171,13358204,13359433,13360513,13365709,13367406,13368039,13370963,13371636,13374242,13374490,13374732,13375431,13378791,13378930,13379400,13380095,13383540,13388084,13390629,13390740,13393166,13398963,13402150,13403169,13404717,13404761,13407147,13407556,13408347,13409107,13409240,13409528,13409583,13411823,13412073,13412657,134…	3_13421150_C_T;3_13407556_T_C;3_13395579_C_A;	3_13427288_GGATGAATGGGTA_G;3_13409583_AT_A;3_13393166_CTT_C;3_13393166_CT_C;3_13374242_CAT_C;3_13370443_ATACCTAAGGGACAACATACAGGTATGATGAGGATTCAGTGCCAGGGACTGGCCTCCAGGAAAACCCACCTCCCAAGGAGGGGACACCTGCCCCCAGCAGGATCCACCTCAGGAACAATGCAGGGCTGGACTTAGGGGTCCTGAGAGGAGTAAAGGCCACACTCCCCAGAGTGTCCCAACCTAGTGACAAGGTTCTTACTTCCCAACACAGCAGACTGGCCTCTCTATGAGAAAACCCACCCAGGAGTGTCCCAATCCATGACTTGAATAAATGAGATCACTATTTACATTGCAA…	3_13370443_ATACCTAAGGGACAACATACAGGTATGATGAGGATTCAGTGCCAGGGACTGGCCTCCAGGAAAACCCACCTCCCAAGGAGGGGACACCTGCCCCCAGCAGGATCCACCTCAGGAACAATGCAGGGCTGGACTTAGGGGTCCTGAGAGGAGTAAAGGCCACACTCCCCAGAGTGTCCCAACCTAGTGACAAGGTTCTTACTTCCCAACACAGCAGACTGGCCTCTCTATGAGAAAACCCACCCAGGAGTGTCCCAATCCATGACTTGAATAAATGAGATCACTATTTACATTGCAAGAGGGCCCCCTGGGCTGCAAATGTCCAGTTTCTTCAGAGAACCTGGCTCTTGGGGCATTTAAAGAAACGAAATCCTCCTCGATCGCAGGGGCA…	3_13358204_G_A;3_13358171_T_A;3_13358130_C_T;	3_13438830_A_G;3_13438319_G_A;3_13438234_T_C;3_13437950_C_T;3_13437883_G_T;3_13437275_T_C;3_13437052_G_A;3_13436336_A_C;3_13435917_G_A;3_13435860_G_T;3_13435550_T_C;3_13435392_C_G;3_13435352_A_G;3_13435095_G_A;3_13434543_A_G;3_13434264_G_A;3_13434099_T_C;3_13433158_T_G;3_13433120_C_T;3_13432581_A_G;3_13432222_A_G;3_13432213_C_T;3_13431888_G_T;3_13431430_T_C;3_13430955_G_C;3_13429290_A_G;3_1342858…		3_13383540_A_G;3_13379400_C_T;3_13367406_C_T;	0.4702970297029703	3	-1	13357737	13461809
ENSG00000132196	ENSG00000132196	YATDLLSVALNR	P56937-3	1_162732701_A_G	rs2805024	1.3091671942513775e-08	8.77268910830168e-12	10.0	3.417992911791748e-15	-0.8139082979539225	1.6453382698672081e-12	-0.8216392386322189	3.2233915674750027e-22	-1.0100124820603054	1.1012095935040426e-19	-0.9284644218573246	False	162732701,162696248,162712404,162716143,162726281,162730298,162732491,162736690,162748025,162753092,162754049,162757246,162758617,162765636,162765811,162766476		1_162765811_AT_A;1_162765636_AAGTCTTAGATGAAG_A;			1_162766476_C_T;1_162765811_AT_A;1_162765636_AAGTCTTAGATGAAG_A;	1_162766476_C_T;1_162765811_AT_A;1_162765636_AAGTCTTAGATGAAG_A;		0.2227722772277228	1	1	162760492	162782607
ENSG00000132199	ENSG00000132199	GTEVVVCAVNALAHHVLNK	Q7L5Y1	18_685797_C_T	rs2847329	0.0019252921191972628	7.734211661931943e-06	7.0	1.8956765646055317e-09	0.6097119371371287	2.3782547786886208e-05	0.3854845479234774	9.754934607051428e-16	0.7281665183454954	0.0004828785955080533	0.2021333066808277	False	685797,688103,688463,691173,691439,692095,693986,694206,698024,700687,700916,701572,702014,702196,702512,703388,703442,703785,704232,704407,704901,704955,705087,705695,705820,706047,706182,706322,706589,707497,707560,708299,708710,709379,709590		18_706322_C_CACTG;18_704955_C_CAGG;18_703388_AT_A;18_693986_GCT_G;18_693985_AGC_A;			18_709590_G_T;18_709379_A_G;18_708710_C_G;18_708299_T_C;18_707560_A_C;18_707497_T_C;18_706589_A_G;18_706322_C_CACTG;18_706182_TC_CT;18_706182_T_C;18_706047_G_T;18_705820_T_C;18_705695_G_T;18_705087_C_T;18_704955_C_CAGG;18_704901_T_C;18_704407_A_G;18_704232_G_A;18_703785_G_C;18_703442_G_A;18_703388_AT_A;18_702512_C_T;18_702196_T_G;18_702014_G_A;18_701572_T_C;18_700916_A_G;18_700687_T_C;18_698024_G…	18_709590_G_T;18_709379_A_G;18_708710_C_G;18_708299_T_C;18_707560_A_C;18_707497_T_C;18_706589_A_G;18_706322_C_CACTG;18_706182_TC_CT;18_706182_T_C;18_706047_G_T;18_705820_T_C;18_705695_G_T;18_705087_C_T;18_704955_C_CAGG;18_704901_T_C;18_704407_A_G;18_704232_G_A;18_703785_G_C;18_703442_G_A;18_703388_AT_A;18_702512_C_T;18_702196_T_G;18_702014_G_A;18_701572_T_C;18_700916_A_G;18_700687_T_C;18_698024_G…		0.4306930693069307	18	-1	670324	712676
ENSG00000132305	ENSG00000132305	VVSQYHELVVQAR	Q16891-2	2_86296413_G_A	rs6735014	0.00021018109633222213	9.471497725388404e-08	47.0	7.62072129236953e-11	-0.4231423064141273	1.5461176304780274e-14	-0.4997249079504122	4.2600518155627517e-16	-0.3960233030436591	2.4983528781501212e-23	-0.7715692509157717	True	86296413,86202272,86216343,86219227,86225535,86227341,86239346,86241607,86244704,86254268,86258784,86259741,86261291,86270966,86271073,86272191,86274890,86275985,86277308,86301305,86301978,86311485,86312176,86313182,86316382,86317735,86322071,86324760,86339331,86341328,86360225,86365607,86371012,86371883,86372188,86375470,86375748,86377143,86377549,86378292,86379882,86380113,86381063,86381496,863…		2_86422796_A_ACTG;2_86410758_TC_T;2_86409883_ACTTGAG_A;2_86404371_CT_C;2_86388604_CTT_C;2_86387751_C_CAAATAACTA;2_86372188_C_CAGGCAGT;		2_86422816_T_G;2_86422796_A_ACTG;2_86422660_C_T;2_86422073_G_C;	2_86422421_T_G;2_86422416_T_C;2_86422073_G_C;2_86421702_T_C;2_86421507_G_A;2_86421332_G_A;2_86421209_G_A;2_86420255_G_A;2_86419932_C_G;2_86419602_A_C;2_86418955_A_G;2_86417975_A_G;2_86417908_C_T;2_86416915_T_C;2_86415573_A_G;2_86414984_G_A;2_86414870_C_T;2_86414853_G_C;2_86414283_T_C;2_86412251_C_T;2_86411607_G_A;2_86411275_G_A;2_86410758_TC_T;2_86410715_A_G;2_86410069_A_T;2_86409883_ACTTGAG_A;2_…	2_86422421_T_G;2_86422416_T_C;2_86422073_G_C;2_86421702_T_C;2_86421507_G_A;2_86421332_G_A;2_86421209_G_A;2_86420255_G_A;2_86419932_C_G;2_86419602_A_C;2_86418955_A_G;2_86417975_A_G;2_86417908_C_T;2_86416915_T_C;2_86415573_A_G;2_86414984_G_A;2_86414870_C_T;2_86414853_G_C;2_86414283_T_C;2_86412251_C_T;2_86411607_G_A;2_86411275_G_A;2_86410758_TC_T;2_86410715_A_G;2_86410069_A_T;2_86409883_ACTTGAG_A;2_…		0.4851485148514851	2	-1	86371055	86422893
ENSG00000132376	ENSG00000132376	STPTGLFGYWGNK	Q9BT40-2	17_1211215_G_C	rs62087871	0.07649748639907393	0.0005995674714777242	8.0	5.081831276952591e-07	-1.0540772407440724	0.012208892181426704	-0.4827064665921368	3.0028923018966918	-0.3007615785672325	0.052052739445072924	-0.3009861756391937	True	1211215								0.054455445544554455	17	-1	1397865	1420182
ENSG00000132470	ENSG00000132470	VLSQLTSDYTIGFGK	P16144	17_73717421_C_G	rs16967277	0.06887874035413022	0.0005757654666433559	7.0	1.074555837487017e-06	0.997772172953072	8.42982815460203e-07	0.43016359496826695	5.026249081053581e-23	0.8535076916338357	4.006722954442323e-29	0.9901872769890558	True	73717421,73682028,73685659,73690287,73697391,73702253,73704163,73704333,73704865,73706262,73708829,73714342,73723239,73724941,73729445				17_73717421_C_G;	17_73729445_C_A;17_73724941_G_A;17_73723239_G_A;			0.3787128712871287	17	1	73717408	73753899
ENSG00000132600	ENSG00000132600	EAEPHPLWEYPCR	Q9NVM4-3	16_68393405_C_T	rs12599876	0.0006356242536349612	1.5287839533400412e-06	10.0	1.9093228442401775e-09	1.047140121185008	1.4974349207960938e-09	0.9684473683339372	1.100418968942364e-11	0.983637124791571	1.0078828107321112e-12	0.8883786025980409	False	68393405,68364358,68365363,68368770,68369213,68369959,68372730,68376811,68377520,68378341,68378985,68379860,68381516,68382716,68384837,68387457,68390099,68395061,68395675,68396119,68397775,68398111,68398862,68399421,68399590,68402649,68409535	16_68387457_C_G;	16_68365363_TTTG_T;		16_68387457_C_G;	16_68390099_C_A;16_68384837_G_A;16_68381516_G_A;16_68379860_C_T;16_68378985_G_T;16_68378341_C_T;16_68377520_C_T;16_68376811_G_A;16_68372730_G_A;16_68369959_C_T;16_68369213_T_C;16_68368770_G_T;16_68365363_TTTG_T;16_68364358_C_G;	16_68390099_C_A;16_68387457_C_G;16_68384837_G_A;16_68381516_G_A;16_68379860_C_T;16_68378985_G_T;16_68378341_C_T;16_68377520_C_T;16_68376811_G_A;16_68372730_G_A;16_68369959_C_T;16_68369213_T_C;16_68368770_G_T;16_68365363_TTTG_T;16_68364358_C_G;	16_68387457_C_G;	0.09158415841584157	16	1	68344877	68392466
ENSG00000132906	ENSG00000132906	LFFIQACGGEQK	P55211	1_15817318_A_T	rs4646110	0.0029002872822513483	1.4460368963400684e-05	6.0	5.188635172342208e-10	-0.652341884159541	2.598041376446729e-06	-0.436590145590775	1.307332087178676e-17	-0.9610387196883048	6.4049123387631e-17	-0.7845545932557284	True	15817318,15805662,15805722,15807142,15809601,15810172,15810424,15812665,15816562,15817319,15817519,15818149,15819827,15820307,15820758,15821164,15821673,15822043,15822404,15822638,15822678,15824854,15824905,15825411,15825564,15826292,15827027,15827136,15827461,15827711,15829813,15832229,15834648,15838604,15839112,15839206,15843244,15849742,15850386,15850603,15856251,15857918,15860147,15860185,158…		1_15850386_GCTGA_G;1_15824854_AT_A;1_15822678_TG_T;1_15822638_TC_T;1_15817519_AG_A;		1_15819827_T_A;1_15818149_T_A;1_15817519_AG_A;	1_15850603_G_A;1_15850386_GCTGA_G;1_15849742_G_T;1_15843244_G_A;1_15839206_T_C;1_15839112_G_A;1_15838604_G_A;1_15834648_A_G;1_15832229_G_A;1_15829813_G_A;1_15827711_G_A;1_15827461_T_C;1_15827136_C_T;1_15827027_C_T;1_15826292_G_A;1_15825564_G_A;1_15825411_A_T;1_15824905_C_A;1_15824854_AT_A;1_15822678_TG_T;1_15822638_TC_T;1_15822404_A_G;1_15822043_T_C;1_15821673_C_T;1_15821164_G_C;1_15820758_A_G;1_…	1_15850603_G_A;1_15850386_GCTGA_G;1_15849742_G_T;1_15843244_G_A;1_15839206_T_C;1_15839112_G_A;1_15838604_G_A;1_15834648_A_G;1_15832229_G_A;1_15829813_G_A;1_15827711_G_A;1_15827461_T_C;1_15827136_C_T;1_15827027_C_T;1_15826292_G_A;1_15825564_G_A;1_15825411_A_T;1_15824905_C_A;1_15824854_AT_A;1_15822678_TG_T;1_15822638_TC_T;1_15822404_A_G;1_15822043_T_C;1_15821673_C_T;1_15821164_G_C;1_15820758_A_G;1_…	1_15850603_G_A;	0.1831683168316832	1	-1	15817327	15853029
ENSG00000133030	ENSG00000133030	VAVTSSSSSSSSSSSIPSAEK	H0Y2S9	17_16957827_T_C	rs7221842	0.0002731014003091073	1.5166574146638446e-07	39.0	8.489532390588355e-10	-1.314174899970624	0.027243248560366643	-0.08943627262457854	0.2305750696322273	-0.26694427170042995	0.06505483984312435	-0.09943282158631966	False	16957827,16971521,17002531,17003436,17007351,17024812,17036743,17040820,17040844,17044781,17057384,17064775,17078017,17082422,17094539		17_17064775_G_GC;17_17057384_AGATACCG_A;17_17057381_AGAAGATA_A;17_17040844_T_TG;17_17040843_AT_AAG;17_17024812_C_CAG;17_17007351_A_AG;		17_17094539_T_G;	17_17094539_T_G;17_17082422_A_G;17_17078017_T_C;17_17064775_G_C;17_17064775_G_GC;17_17057384_AGATACCG_A;17_17057381_AGAAGATA_A;17_17044781_A_G;17_17040844_T_TG;17_17040844_T_G;17_17040843_AT_AAG;17_17040820_G_C;17_17036743_T_G;17_17024812_C_CAG;17_17007351_A_AG;17_17003436_C_A;17_17002531_G_T;17_16971521_G_A;17_16957827_T_C;			0.2549504950495049	17	1	16945859	17120993
ENSG00000133627	ENSG00000133627	GVDDLDFFIGDEAIDKPTYATK	Q9P1U1	7_152484437_T_G	rs4725474	0.09604721182861928	0.0006608489505977754	10.0	1.10016695696396e-06	0.3561954052128113	0.0006380407870054832	0.3275585950668236	8.730830043904323e-05	0.30756492515411266	0.0001295640150964832	0.3089665959848724	False	152484437					7_152484437_T_G;			0.3564356435643564	7	1	152456834	152552463
ENSG00000133636	ENSG00000133636	AFQHWELIQEDILDTGNDK	P30990	12_86159134_G_T	rs61930589	0.0012767761989714113	1.6729327963069227e-05	2.0	6.41048423094992e-10	0.9355210727468988	1.5671751838687134e-10	0.8915771981295669	3.062007734012857e-24	1.0126474136197885	8.077573506836694e-25	1.0017765177412208	False	86159134								0.2821782178217821	12	1	86268073	86276770
ENSG00000133641	ENSG00000133641	EFFWNVEEDFKPAPECWIPAK	Q8N999	12_88444592_G_A	rs2468240	0.09841492648370292	0.0006818504539196363	10.0	5.444307477583619e-07	-0.8993517425212225	0.0085022631226268	-0.2349922682833369	0.06850599610781437	-0.18189069008444608	0.7966696102880327	0.015684860464155542	False	88444592,88440676,88463451,88470018,88494718,88504260,88546982,88573541,88583018,88598301,88601064	12_88440676_G_C;			12_88440676_G_C;		12_88440676_G_C;		0.4504950495049505	12	1	88427623	88443937
ENSG00000133731	ENSG00000133731	LQVSQQEDITK	P29218	8_82553983_A_G	rs2975935	1.231108266162987e-05	1.2416517838529929e-08	14.0	4.1000906101295524e-13	-0.6866288222380996	5.622782301219521e-17	-0.6279023089198139	1.5304900615329654e-19	-0.6973274000073666	1.8252246514848486e-22	-0.8776050257770267	False	82553983,82565202,82570631,82575783,82583771				8_82570631_C_T;	8_82583771_G_T;8_82575783_C_T;	8_82583771_G_T;8_82575783_C_T;		0.2524752475247525	8	-1	82570196	82598928
ENSG00000133818	ENSG00000133818	DRDEFPMILIGNK	P62070	11_14425286_G_A		0.05419862199734272	0.0002061435818459932	14.0	5.258386328811599e-07	0.4588258792956808	1.6098952667451312e-05	0.4317257669724994	3.126036558127142e-09	0.4542937246762455	1.8091654769092446e-10	0.392707593833672	False	14425286								0.25	11	-1	14299472	14386052
ENSG00000133835	ENSG00000133835	LQSTFVFEEIGR	P51659	5_119170159_A_G	rs34389270	0.00045309096509906524	2.5521632591961635e-07	41.0	0.00038048940385563483	-0.3776947424944015	0.014385718743822782	-0.27509509456582304	24.92060705163219	0.009544847837672552	0.7260152262657851	-0.033883261102809294	False	119170159								0.1707920792079208	5	1	118788138	118972894
ENSG00000133943	ENSG00000133943	HLVDPIDDLFLAAK	Q7Z3D6-2	14_91636532_C_T	rs4900072	1.4809745354264186e-18	4.400562413726711e-23	14.0	6.488594828807618e-27	-1.1489942664223394	5.069977088852599e-31	-1.1252217623164642	8.88063566858227e-33	-0.8163095180169488	6.911976252738966e-05	0.2387000691726491	False	91636532,91619960,91621154,91622583,91623533,91631360,91636395,91643173	14_91636532_C_T;	14_91623533_GGATA_G;	14_91636532_C_T;		14_91643173_T_A;14_91636395_C_T;14_91631360_G_A;14_91623533_GGATA_G;14_91622583_G_A;14_91621154_A_G;14_91619960_G_T;14_91636532_C_T;	14_91643173_T_A;14_91636395_C_T;14_91631360_G_A;14_91623533_GGATA_G;14_91622583_G_A;14_91621154_A_G;14_91619960_G_T;14_91636532_C_T;	14_91636395_C_T;	0.301980198019802	14	1	91526677	91691976
ENSG00000133985	ENSG00000133985	YIQLTEMK	Q92623	14_71130306_G_A	rs12589380	0.0956970729059547	0.0013077793058556956	5.0	1.7451265514918143e-06	0.522503319342781	1.3391795806551524e-05	0.4441679496047772	5.075673531508412e-07	0.3413819016133043	2.0675256551403823e-06	0.3328055972248892	False	71130306					14_71130306_G_A;			0.2351485148514852	14	1	71108504	71142077
ENSG00000134248	ENSG00000134248	LTSDPTDIPVVCLESDNGNIMIQK	E9PLX3	1_111136945_G_A	rs4839531	0.0008059794097588557	4.031343703233238e-06	5.0	0.009325131963130529	0.16686904678483772	0.4250652392945485	0.09044824494531516	0.48282126689245203	0.12640152682229902	0.9247330857108459	-0.005752399555762994	False	111136945								0.4158415841584158	1	-1	110943871	110950564
ENSG00000134330	ENSG00000134330	GNEFLFSHLWPLIEK	Q2TAA2	2_9553163_G_A	rs11692768	0.00011935695532467373	5.784320558393306e-07	4.0	1.7586360022166123e-11	0.8848207050227503	1.5139179867721458e-11	0.806080735160192	7.621802068815169e-16	0.9654187162795308	1.4977443368286582e-24	1.1529195400471448	False	9553163,9546805,9549753,9549975,9550041,9550880,9551851,9551919,9555692,9557636,9558614,9559590,9559750,9560346,9560372,9560413,9561039,9561505,9561990,9562263,9562294,9564534,9564823,9567444,9569123,9573113,9573666,9575793,9576771,9581666,9582842,9583044,9583822,9585705,9585852,9587180,9587434,9588091,9588691,9591277,9602747,9614218,9617309,9618133,9626004,9629731,9632802,9637403,9644652,9647859…				2_9629731_T_C;	2_9632802_T_C;2_9629731_T_C;2_9626004_A_G;2_9618133_T_C;2_9617309_C_A;2_9614218_G_T;	2_9626004_A_G;2_9618133_T_C;2_9617309_C_A;		0.1831683168316832	2	1	9613787	9636672
ENSG00000134333	ENSG00000134333	LKGEMMDLQHGSLFLR	P00338-3	11_18219459_C_T	rs1818736	0.09289119382368882	0.00036680739454131035	17.0	1.954904703311553e-06	0.42286174288312334	0.9769888865875908	0.0021054445021775336	0.6444629409489467	0.2283633925486689	0.4754837462484918	-0.052395465426994685	False	18219459,18219444								0.5	11	1	18415935	18429972
ENSG00000134463	ENSG00000134463	VIIISAEGPVFSSGHDLK	Q96DC8	10_11789637_G_A		0.05031217167460271	0.0003715423881336154	7.0	6.808380683751648e-08	-0.8095270182097014	4.614290926502233e-09	-0.6962822902287016	0.0006275090377063572	-0.4279450105981863	8.80933134934586e-05	-0.4064078913983637	False	11789637,11784978,11785247,11785767,11797220,11797758,11800229,11804067,11804197,11804582,11804733,11808149,11808177,11808342,11812916,11815803,11825736,11825785		10_11804067_GA_G;10_11784971_CACTGGGCCTCCAGTC_C;			10_11804733_T_C;10_11804582_A_G;10_11804197_A_G;10_11804067_GA_G;10_11800229_T_G;10_11797758_G_A;10_11797220_G_A;10_11785767_T_C;10_11785247_A_G;10_11784978_C_T;10_11784971_CACTGGGCCTCCAGTC_C;10_11789637_G_A;			0.30445544554455445	10	1	11784365	11806069
ENSG00000134686	ENSG00000134686	WNVEDVYEFIR	A0A0A0MSI2	1_33834455_A_G	rs4653111	0.013037835451808878	0.00012753895514962021	4.0	1.791059305988429e-06	0.4597214113493846	0.0037421241816769533	0.26308011348683424	1.587616012403416e-16	0.5225485053050044	7.27474391277049e-18	0.5468204437883991	False	33834455,33762240,33775350,33776441,33776728,33777524,33778591,33784146,33784929,33789520,33789588,33794156,33795572,33795590,33796834,33799264,33802817,33806556,33810187,33815699,33816726,33818414,33819830,33821807,33822222,33823269,33828259,33828260,33828834,33830023,33831834,33832865,33836796,33836942,33841352,33842053,33842269,33842735,33845463,33847740,33850566,33851782,33854013,33855823,338…		1_33836942_AGCACTC_A;1_33796834_GA_G;1_33794747_GCTGGGAGCAGAGAGTTTTCTTCAGGATGGGGGAACAAACCATCTCTAGCAGCAGTGATGAACAAAGGAGGTATTTCTCCTTTTTCTACTTGGCCTACTACTACACATCTGAGTTCCCAGATCTAACAGCATCTTCCATGCTGTCCTGTCTCCTACCCTAGGCAGAGTTAGTCCCTCTTAGTATTGTAGTGTCTACCACACAATACTGCAATTATCTTTTTCTAAACATGAGTTTTAAAGCAGGGCTCTGAGTTCTAGGAGGTGATCACAGAGCCACTTGAAATAGCATGTAACATTTCTTCTGTACGTACACAGCTTTGGACCATTCTTAAGGAGGTTTAAGACAAAAAA…	1_33794747_GCTGGGAGCAGAGAGTTTTCTTCAGGATGGGGGAACAAACCATCTCTAGCAGCAGTGATGAACAAAGGAGGTATTTCTCCTTTTTCTACTTGGCCTACTACTACACATCTGAGTTCCCAGATCTAACAGCATCTTCCATGCTGTCCTGTCTCCTACCCTAGGCAGAGTTAGTCCCTCTTAGTATTGTAGTGTCTACCACACAATACTGCAATTATCTTTTTCTAAACATGAGTTTTAAAGCAGGGCTCTGAGTTCTAGGAGGTGATCACAGAGCCACTTGAAATAGCATGTAACATTTCTTCTGTACGTACACAGCTTTGGACCATTCTTAAGGAGGTTTAAGACAAAAAAAAAATAAGGCAAAATTATACATAAGGTTATAAAACAT…	1_33789588_T_C;1_33789520_C_A;	1_33836942_AGCACTC_A;1_33836796_C_G;1_33831834_C_T;1_33830023_A_G;1_33828834_C_T;1_33828260_G_A;1_33828259_C_A;1_33823269_T_C;1_33822222_A_C;1_33821807_T_C;1_33819830_A_C;1_33818414_C_T;1_33816726_G_A;1_33815699_A_T;1_33810187_A_G;1_33806556_G_A;1_33802817_A_G;1_33799264_G_T;1_33796834_GA_G;1_33795590_A_T;1_33794747_GCTGGGAGCAGAGAGTTTTCTTCAGGATGGGGGAACAAACCATCTCTAGCAGCAGTGATGAACAAAGGAGGTATTTCTCCT…		1_33832865_A_G;	0.32673267326732675	1	-1	33789224	33896653
ENSG00000134905	ENSG00000134905	GNVYFDLK	Q9HA77	13_111332133_A_G	rs58135183	0.00016725680512118192	2.4016772304106533e-07	14.0	1.7117189733702984e-12	-1.265173176086115	8.564913482570834e-15	-1.1247004602708062	0.00011624432173688347	-0.4611244209847358	7.146060779268155e-05	-0.5301789282468755	False	111332133					13_111332133_A_G;	13_111332133_A_G;		0.0891089108910891	13	-1	111293759	111365950
ENSG00000135052	ENSG00000135052	FSYDLSQCINQMK	Q8NBJ4	9_88714593_C_A	rs148272757	0.07484742338299454	0.0003096484550434032	15.0	2.2328527287188086e-07	0.8563523868924704	2.693995508945994e-05	0.7790046962617485	0.0006945668791870597	0.6801332631863589	0.0005511643069682425	0.7359940865422544	False	88714593,88692255,88692838,88695977					9_88695977_A_T;9_88692838_G_A;9_88692255_C_T;9_88714593_C_A;	9_88692838_G_A;9_88692255_C_T;		0.04950495049504952	9	-1	88641061	88715088
ENSG00000135070	ENSG00000135070	AALTLTPSAVNK	Q9BUE6	9_88870898_C_T	rs1547629	0.029440798079131456	0.0001952688021111985	7.0	1.1300314283198221e-07	-0.4691715121874322	2.311900809539293e-07	-0.4830384361263485	1.2388320757345915e-22	-0.8219553279942381	9.479670462351799e-27	-0.8123928844539002	False	88870898,88873751,88876385,88877961,88878372,88878771,88879525,88881410,88890115,88891693,88893891,88896956,88897082,88897084,88899739,88900096,88901460,88901724,88902663,88903367,88906695,88909501,88913111,88921848,88924057,88924985,88925534,88927389,88934847,88934924,88934982,88935388,88936227,88937617,88940623,88943171,88945138,88945266,88947254,88948401,88948688,88948724,88948748,88948988,889…		9_88897083_CA_C;		9_88896956_A_G;9_88879525_G_A;	9_88897084_A_C;9_88897083_CA_C;9_88897082_C_G;9_88896956_A_G;9_88893891_C_T;9_88891693_T_C;9_88890115_TA_AG;9_88881410_A_G;			0.33663366336633666	9	-1	88879461	88897676
ENSG00000135636	ENSG00000135636	EVLATPSLSASFNAPLLDTK	O75923-14	2_71688294_C_T	rs11126333	0.06506711013865975	9.096258067989744e-05	41.0	3.1623304620798566e-07	-0.4768081433257894	2.9923600517993915e-08	-0.5716043569761842	1.4424231177328352e-09	-0.511400699501252	5.485420953473162e-15	-0.6175351096562908	True	71688294,71688123,71688136,71688588,71688623,71690860					2_71690860_G_A;2_71688623_G_A;2_71688588_G_A;2_71688136_G_A;2_71688123_G_A;2_71688294_C_T;			0.2945544554455445	2	1	71680852	71913898
ENSG00000135643	ENSG00000135643	NLESVMNWQQYWK	Q86W47	12_71073513_A_T	rs2175711	1.3745757782327355e-07	5.674627778991192e-10	2.0	4.698750687877197e-07	2.0050205849531766	0.0016852149206294307	0.8968537213482703	0.001308100294630666	0.25022898349753525	0.0065437302575073065	0.18591717061898846	False	71073513,71081955,71082272								0.1485148514851485	12	1	70760056	70828072
ENSG00000135778	ENSG00000135778	HVFLTGPPGVGK	Q5TDF0	1_233070803_T_C	rs12410594	9.141444427179553e-06	1.1038109928714418e-08	11.0	5.975633242087588e-14	-1.0850330188691162	1.0303519845017152e-10	-0.9396755263264795	5.285075864748621e-08	-0.8551831923925871	2.545652771245042e-07	-0.5788724560634007	False	233070803,233089728,233091463,233105001,233114608			1_233091463_T_A;	1_233114608_C_T;	1_233105001_T_G;1_233089728_C_T;		1_233091463_T_A;	0.09653465346534654	1	1	233086351	233119628
ENSG00000135842	ENSG00000135842	QYSVAFCNHVR	Q9BZQ8	1_184962926_G_A	rs12023631	0.09472344827258093	0.0003064202041286672	21.0	1.6134742559499588e-05	-1.605964242155952	0.002689510206551377	-0.3603868770911896	0.14238139043194575	-0.17564602324309972	0.06982619494987005	-0.18301189248945232	False	184962926,184964347								0.1113861386138614	1	-1	184759858	184943682
ENSG00000136143	ENSG00000136143	SFQGPVLIGSSHGGVNIEDVAAESPEAIIK	Q9P2R7-2	13_48577696_A_C		5.409953552760765e-15	2.4898305210559385e-19	26.0	2.5732209112876113e-23	-1.3864857722127777	4.04425849761683e-10	-0.6200405245990539	1.8785427397841926e-26	-0.9228389399420568	1.3828962978332765e-27	-0.9012425804572278	True	48577696								0.21287128712871287	13	-1	48510622	48612125
ENSG00000136371	ENSG00000136371	VIAHSEYQK	P49914	15_80112067_C_T	rs1114170	2.1761232185056642e-06	2.57791311035133e-08	1.0	3.552211762429587e-13	-0.9534799499081285	2.9443554278117373e-15	-0.9525574408382372	4.311691559711828e-23	-1.0933909796985126	1.240656178968902e-19	-0.9877215136306601	False	80112067,80100264,80100717,80100934,80102172,80102275,80102774,80103113,80104175,80105125,80106535,80107090,80107333,80107797,80110590,80112327,80115348,80119159,80119844,80129813,80135259,80136462,80139251,80140735,80143035,80143075,80147183,80147936,80148220,80150080,80151013,80151907,80154571,80157583					15_80157583_T_C;15_80154571_A_G;15_80151907_C_T;15_80151013_A_G;15_80150080_C_T;15_80148220_T_C;15_80147936_G_A;15_80147183_A_G;15_80143075_A_G;15_80143035_T_C;15_80140735_T_C;15_80139251_T_C;15_80136462_T_A;15_80135259_C_G;15_80129813_T_C;	15_80136462_T_A;15_80135259_C_G;15_80129813_T_C;		0.16584158415841585	15	-1	80125927	80189721
ENSG00000136810	ENSG00000136810	VGEFSGANK	P10599	9_113015602_C_T	rs4135183	0.005430147415565796	2.5990893457297096e-05	7.0	4.4221848456913596e-10	-0.6050814472101527	2.5666704781909807e-09	-0.5800164790595215	2.4428749785209366e-21	-0.9572718866076474	6.070627963745506e-35	-0.8193301997068645	False	113015602,113015000,113015001,113015434,113018755,113020533,113023192,113023522,113023862,113026545,113026993,113028131,113028143,113028353,113028442		9_113015000_C_CGT;		9_113018755_T_C;	9_113015000_CA_CGTT;9_113015000_CA_CGTT;9_113015000_C_CGT;9_113015602_C_T;			0.16336633663366334	9	-1	113006091	113018920
ENSG00000136824	ENSG00000136824	SQSAFDLK	O95347	9_106979488_A_C	rs9721443	3.230825269373028e-05	9.398405692968456e-09	58.0	2.4355236993890357e-13	0.4787664726744927	6.589814806439425e-12	0.5992030590318547	2.437347957526819e-18	0.7359034406916308	1.1785772514523491e-15	0.4101736284251077	True	106979488								0.4826732673267327	9	1	106856541	106903698
ENSG00000136891	ENSG00000136891	LLLQHAPLR	Q9NXF1-2	9_103091805_A_G	rs6479013	0.08798777912124127	0.0001851459474337156	31.0	5.379577713346299e-06	0.4214090248397533	0.6505754145931136	-0.045828504140976715	0.18020863588503105	0.2281248883294189	0.8688317291936841	0.009502388888249036	True	103091805,103108941,103114793				9_103114793_G_C;	9_103114793_G_C;9_103108941_C_G;9_103091805_A_G;			0.1782178217821782	9	-1	103064359	103115221
ENSG00000137073	ENSG00000137073	EKPQISAAQSTQPQK	Q5T6F2	9_33853409_T_C	rs2243565	0.03218999605538127	5.663661172929486e-05	27.0	9.61780947106212e-07	1.2144921196630354	0.6178298602030747	-0.042644721890073616	5.652319066506805e-06	0.5112581585115512	0.7415179922910048	-0.01986042035298405	False	33853409,33791033,33791164,33797056,33797761,33803408,33806026,33810867,33812126,33819555,33819955,33822424,33825229,33826627,33832999,33836655,33838277,33845079,33850683,33854960,33857803,33864064,33870044,33875958,33888753,33889792,33890932,33892723,33896592,33896604,33896951,33897562,33900619,33901903,33902036,33905525,33906395,33907949,33913381,33917498,33921977,33925368,33927325,33929510,339…	9_34017106_C_T;9_33941759_T_C;	9_34005645_AAAAAGGAAAT_A;9_34003057_G_GT;9_33969696_C_CT;9_33958415_CT_C;9_33955448_GC_G;9_33949687_CT_C;9_33943071_AT_A;9_33939062_TCC_T;		9_33921977_G_C;	9_34041927_G_A;9_34039897_C_T;9_34037738_T_C;9_34036756_C_T;9_34034925_A_T;9_34030240_G_A;9_34029505_C_G;9_34028285_G_A;9_34025640_C_G;9_34024931_G_A;9_34023110_G_A;9_34017106_C_T;9_34014100_A_G;9_34013631_C_T;9_34013175_G_A;9_34012799_C_A;9_34010729_G_A;9_34009344_G_A;9_34009167_G_A;9_34008062_G_A;9_34005645_AAAAAGGAAAT_A;9_34003057_G_GT;9_34001993_A_T;9_33999373_G_A;9_33997093_A_G;9_33992678_A_…	9_33940732_G_A;9_33939062_TCC_T;9_33935073_C_A;9_33932688_G_C;9_33931398_G_A;9_33929510_A_G;9_33927325_G_A;		0.3688118811881188	9	-1	33921691	34048947
ENSG00000137124	ENSG00000137124	VLGYIQLGQK	P30837	9_38398150_G_C	rs10758495	6.860766953165156e-07	2.9417751484394494e-10	24.0	2.3239920418162127e-12	-0.8948310371715733	6.217531219082037e-14	-0.9773458413773302	0.4090628230049739	-0.06537011793575834	0.33155803132251904	-0.08070403159852647	False	38398150,38395928,38396002	9_38396002_C_T;			9_38398150_G_C;			9_38395928_C_T;	0.14603960396039606	9	1	38392661	38398658
ENSG00000137364	ENSG00000137364	NQVLTLEEWQDK	P51580	6_18157625_T_C		4.020288458973533e-09	2.2933085543172253e-12	10.0	5.622253681509902e-18	-1.349747519516451	1.6031835065833122e-20	-1.437584751499032	0.23356466345258736	0.13587079928364454	0.500686430894579	0.07209744722356247	False	18157625,18103028,18103119,18104645,18107132,18108531,18109498,18109815,18114246,18114442,18114687,18116426,18116478,18116485,18117820,18117955,18118392,18118540,18118712,18118725,18118898,18119458,18119510,18119688,18120013,18120156,18120172,18120400,18120484,18120554,18120564,18121024,18121029,18121314,18122942,18124230,18124962,18125063,18125603,18126938,18128201,18128481,18130918,18132495,181…	6_18139228_C_T;6_18130918_T_C;	6_18154526_CACAA_C;6_18154525_CCA_C;6_18152819_TTTC_T;6_18144098_AG_A;6_18142802_C_CCAAA;6_18140894_G_GAC;			6_18154526_CACAA_C;6_18154525_CCA_C;6_18152819_TTTC_T;6_18152540_G_C;6_18152293_T_C;6_18152190_T_C;6_18151571_T_C;6_18149105_A_T;6_18148665_G_C;6_18147958_C_A;6_18145907_C_T;6_18145891_G_A;6_18145750_T_C;6_18145733_T_G;6_18144905_C_T;6_18144521_A_T;6_18144098_AG_A;6_18143512_C_T;6_18142802_C_CCAAA;6_18142288_C_T;6_18141639_T_C;6_18140894_G_GAC;6_18140563_C_T;6_18135520_T_C;6_18135341_G_A;6_181324…			0.061881188118811874	6	-1	18128542	18155305
ENSG00000137806	ENSG00000137806	AIRDEAIYHFR	Q9Y375	15_41655523_G_C	rs28716108	3.4054303683033754e-05	4.451092242330973e-08	13.0	6.051504440645133e-10	-0.5463993152262354	3.231747359073369e-06	-0.4283370508348572	2.4217018567304928e-23	-0.9073930629987847	2.6412353784340816e-26	-0.9665024615810224	True	41655523,41579322,41581624,41582598,41585926,41586798,41586909,41588762,41588872,41603276,41603944,41605632,41608470,41611066,41612180,41613388,41614122,41614704,41620014,41621842,41621921,41622793,41623308,41629502,41634587,41634588,41648967,41649922,41651721,41654617,41654801,41657144,41663896,41674060,41676817,41677692,41677752,41682896,41683159,41685740,41685917,41694743,41698305,41701021,417…					15_41685917_G_T;15_41685740_A_G;15_41683159_A_G;15_41682896_A_G;	15_41685917_G_T;15_41685740_A_G;15_41683159_A_G;15_41682896_A_G;		0.2599009900990099	15	-1	41679551	41694717
ENSG00000137944	ENSG00000137944	ALSYLYEK	Q6YP21	1_89388944_A_C	rs7532151	1.1753177732492432e-08	3.3630997980713064e-12	23.0	2.3774213352620874e-16	-0.7420668186285031	4.132308134380909e-23	-0.8342090351708578	3.156408630687581e-16	-0.7341337846862339	3.43756227101256e-25	-0.8650172657554182	False	89388944,89364006,89364972,89366676,89368765,89373371,89376929,89382664,89383098,89396447,89402379,89402960,89403478,89406541,89407214,89409911,89412372,89413353,89413873,89413920,89415576,89416516,89417315,89418231,89418403,89419575,89419588,89420315,89422084,89422173,89423920,89425806,89425939,89425966,89426260,89426277,89426902,89427453,89427571,89428107,89429039,89429149,89430420,89431277,894…		1_89444497_AT_A;1_89419588_CT_C;1_89413914_CAATTTAGTAT_C;1_89402379_GC_G;			1_89447978_T_A;1_89444965_C_T;1_89444497_AT_A;1_89443967_A_T;1_89442732_T_C;1_89441642_A_G;1_89440977_G_A;1_89440917_C_A;1_89440804_G_A;1_89438739_T_A;1_89438598_G_C;1_89438113_A_G;1_89436181_T_C;1_89435778_T_C;1_89435523_T_A;1_89435414_A_G;1_89431277_C_T;1_89430420_A_G;1_89429149_T_C;1_89429039_T_A;1_89428107_A_G;1_89427571_G_C;1_89427453_G_A;1_89426277_C_T;1_89426260_T_C;1_89425966_T_C;1_894259…		1_89426902_G_A;	0.4504950495049505	1	-1	89401456	89458636
ENSG00000138036	ENSG00000138036	GVINQLAFGIDK	Q8TCX1	2_43989956_C_G	rs1897426	0.013965862558962207	0.00013828827650521993	4.0	2.068505954535013e-08	0.6501228011726644	5.283441114032427e-06	0.5011149932523935	3.3772667829055485e-05	0.4680965368059059	2.873702347152126e-06	0.458879850380676	True	43989956,43959547,43960820,43960925,43961449,43966212,43975181,43975446,43975957,43975969,43976541,43984902,43985517,43985940,43988524,43991310,43993448,43994697,43996127,43996925,43997078,43997146,43997228,43997249,43997359,43997468,43997589,43997612,43998010,43998625,43998630,43999182,43999558,43999734,44000365,44000435								0.33910891089108913	2	1	44001178	44037149
ENSG00000138095	ENSG00000138095	SVLELIPELNEK	P42704	2_44143756_A_G	rs6759659	1.7596257009512825e-06	2.417507466771691e-10	81.0	6.383734784753605e-14	0.6143117604587477	9.028765220329412e-17	0.7327384687655745	1.0912000266562575e-32	0.7460368680107397	9.06023112463495e-34	0.8818191025313499	True	44143756,44123073,44125086,44125210,44128912,44133774,44135775,44135997,44141849,44143216,44145374,44149442,44151572,44151808,44153682,44155986,44164481,44165733,44172444,44173422,44178034,44180796		2_44135775_CT_C;			2_44180796_G_A;2_44178034_T_C;2_44173422_T_G;2_44172444_A_C;2_44165733_C_G;2_44164481_T_A;2_44155986_T_C;2_44153682_T_C;2_44151808_C_T;2_44151572_G_C;2_44149442_T_C;2_44145374_G_T;2_44143216_T_A;2_44141849_T_C;2_44135997_C_A;2_44135775_CT_C;2_44133774_C_G;2_44128912_C_T;2_44125210_T_A;2_44125086_C_T;2_44123073_A_T;2_44143756_A_G;			0.400990099009901	2	-1	44113647	44223144
ENSG00000138182	ENSG00000138182	TLNVLFDSLQER	Q96Q89	10_91390200_T_C		1.3734761825417348e-05	3.5511422863542518e-09	56.0	7.107698618738407e-14	-0.8057909935739267	2.962109724083747e-09	-0.6997229755649705	0.5094030645453302	-0.06974554737092759	0.14499384618858585	-0.056444695875699724	False	91390200,91390240,91390407,91390731,91392543,91392767,91394079,91394659,91397564,91406251,91406927,91408756,91409381,91413368,91419285,91429476,91433162,91434677,91436057,91438098,91441689,91441892,91443283,91454731,91455205,91458587,91460084,91463751,91468925,91471015,91476465,91481448,91482629,91482830,91487649,91488979,91494967,91495322,91501477,91505383,91513152,91517355,91521030,91522689,915…	10_91488979_A_T;10_91487649_A_T;10_91468925_C_G;	10_91529441_CAT_C;10_91482830_CTG_C;	10_91468925_C_G;		10_91529441_CAT_C;10_91526599_T_G;10_91522689_G_A;10_91521030_G_A;10_91517355_A_G;10_91513152_A_G;10_91505383_C_T;10_91501477_C_G;10_91495322_G_A;10_91494967_T_C;10_91482830_CTG_C;10_91482629_A_T;10_91481448_A_G;10_91476465_T_C;10_91471015_A_G;10_91463751_A_C;			0.2004950495049505	10	1	91461367	91534700
ENSG00000138346	ENSG00000138346	DGTVGELLK	P51530	10_69999465_G_A		0.07642929034378958	0.00010176847247383884	47.0	9.414617086092767e-08	-1.2247002291657187	0.7439162355962159	-0.05617792234468767	0.2491487068987009	-0.33556630069746085	0.01432797674691406	-0.3390304338392629	False	69999465,70002020,70002260,70002494,70002705,70002749,70002971,70004963,70013644,70014230,70024963,70024977,70025840,70032004,70032522								0.07425742574257425	10	-1	70173821	70231879
ENSG00000138363	ENSG00000138363	EALGIPAAASFK	P31939	2_216176807_T_G	rs4535042	4.197807197103829e-09	6.609346084127122e-13	38.0	5.292532351806622e-17	-0.6060936849772975	1.703517949793423e-21	-0.7433496881972794	1.3588187609569384e-13	-0.6251673979355729	1.750324027616508e-21	-0.8922938604737656	False	216176807,216162062,216165244,216167244,216179264,216180559,216181279,216187056,216190020,216193600,216194586,216194634,216205472,216207924,216208149,216208235,216208950,216209472,216212089,216212339,216214124,216216804,216218202,216218830,216219885,216220870,216221540,216222938,216223017,216223272,216224790,216228483,216229692,216232108	2_216190020_C_G;	2_216213971_GGGTAAGTATGGAATTGGGTGCATTTGCTTAGAGTTGAGCATTATGTAGAAACTGTTTCAGAAATCCTGCTTTTGATTTTTAAAAGGTGTGGCAAAGTGATACAGATCAGTAATATTCAGAGAACCATTTGACTTCTCCATTGGGTGGATGGAGAACCCAAATCCTGTTGTTATTTTGCCTTTTTGACTGAGTGTATCTTTGTTAGCATATGCTTTTTAGAGGGGGATTTTGAGTTTTGCAGGTTTTTACATAAAATCGCGTTTTGAAAATCAATATACTTCCCCCA_G;2_216211662_GAGGTGAAAGACTTGGCATTGGGTTCTCGGCTGTGTTAATATTCAGTTCAACCCTTTATGTGTAACAGATTTTAACTTCATCACC…	2_216213971_GGGTAAGTATGGAATTGGGTGCATTTGCTTAGAGTTGAGCATTATGTAGAAACTGTTTCAGAAATCCTGCTTTTGATTTTTAAAAGGTGTGGCAAAGTGATACAGATCAGTAATATTCAGAGAACCATTTGACTTCTCCATTGGGTGGATGGAGAACCCAAATCCTGTTGTTATTTTGCCTTTTTGACTGAGTGTATCTTTGTTAGCATATGCTTTTTAGAGGGGGATTTTGAGTTTTGCAGGTTTTTACATAAAATCGCGTTTTGAAAATCAATATACTTCCCCCA_G;2_216211662_GAGGTGAAAGACTTGGCATTGGGTTCTCGGCTGTGTTAATATTCAGTTCAACCCTTTATGTGTAACAGATTTTAACTTCATCACC…	2_216213971_GGGTAAGTATGGAATTGGGTGCATTTGCTTAGAGTTGAGCATTATGTAGAAACTGTTTCAGAAATCCTGCTTTTGATTTTTAAAAGGTGTGGCAAAGTGATACAGATCAGTAATATTCAGAGAACCATTTGACTTCTCCATTGGGTGGATGGAGAACCCAAATCCTGTTGTTATTTTGCCTTTTTGACTGAGTGTATCTTTGTTAGCATATGCTTTTTAGAGGGGGATTTTGAGTTTTGCAGGTTTTTACATAAAATCGCGTTTTGAAAATCAATATACTTCCCCCA_G;2_216190020_C_G;2_216176807_T_G;	2_216214124_G_A;2_216213971_GGGTAAGTATGGAATTGGGTGCATTTGCTTAGAGTTGAGCATTATGTAGAAACTGTTTCAGAAATCCTGCTTTTGATTTTTAAAAGGTGTGGCAAAGTGATACAGATCAGTAATATTCAGAGAACCATTTGACTTCTCCATTGGGTGGATGGAGAACCCAAATCCTGTTGTTATTTTGCCTTTTTGACTGAGTGTATCTTTGTTAGCATATGCTTTTTAGAGGGGGATTTTGAGTTTTGCAGGTTTTTACATAAAATCGCGTTTTGAAAATCAATATACTTCCCCCA_G;2_216212339_T_C;2_216211662_GAGGTGAAAGACTTGGCATTGGGTTCTCGGCTGTGTTAATATTCAGTTCAACC…	2_216190020_C_G;2_216187056_T_C;2_216181279_C_T;2_216180559_T_A;2_216179264_C_G;2_216176807_T_G;		0.2821782178217821	2	1	216176540	216214487
ENSG00000138621	ENSG00000138621	SRSDPVLHIDLR	Q96CD2	15_75472094_A_G	rs16966785	0.013235162410864195	6.51305557193718e-05	8.0	4.4048273614502816e-05	-1.2601202645976066	0.5234701397969295	-0.07257881187589278	1.0260433199592276	-0.1912628917781461	0.4260988622543297	-0.08931976464969907	False	75472094								0.11386138613861388	15	1	75315896	75409803
ENSG00000138744	ENSG00000138744	TPLIADVYYIVGGTSPR	Q02083-2	4_76859705_C_G	rs13111710	0.021612313840900125	0.0003086118764725079	3.0	1.8107527750438528e-08	0.6934933545823999	1.3010977470631424e-10	0.7576419539109678	3.6574381361281677e-31	1.0310044722510268	1.0215538541565042e-39	1.0696781316186743	False	76859705,76852585,76853790,76856440,76859615,76860040,76861859,76862255,76870229,76875316,76878716,76878956,76878982,76883281,76886397,76886398,76889388,76891157,76895865,76897791,76898174,76898250,76902033,76903036,76904262,76905472,76905649,76906974,76907213,76916146,76916256,76919536,76920809				4_76856440_T_A;	4_76861859_C_T;4_76860040_G_A;4_76859615_A_T;4_76856440_T_A;4_76853790_C_G;4_76852585_A_C;4_76859705_C_G;			0.3663366336633663	4	-1	76831809	76862204
ENSG00000138794	ENSG00000138794	IEIQTLTGLFK	P55212	4_110623495_T_C		0.03355846999378311	0.00013452300404352452	12.0	4.101976688770032e-06	-0.3126715767590253	6.029315906931529e-07	-0.33273008378616803	3.5859688766054437e-06	-0.3350892758708621	1.6341628458786653e-08	-0.38510571003393135	False	110623495,110626506,110626891,110629497,110631621								0.4207920792079208	4	-1	110609785	110624739
ENSG00000138801	ENSG00000138801	TDAETLPALK	O43252	4_108641119_C_A	rs2522435	0.01625595411432723	1.9280267111503128e-05	34.0	2.9663433300833388e-08	0.7825975520489674	0.0012602860802834134	0.3632960824844451	6.436848731516392e-15	1.014301250819639	1.889192511373883e-18	1.1928537199493792	False	108641119,108640880,108641169,108641300,108641464,108641465,108641601,108642953,108644404,108644679,108646326,108648341,108650092,108650607,108651407,108652120,108654266,108655711,108658139,108661657,108663987,108664579,108667068,108668380,108671469,108677958,108682091,108682910,108685381,108687889,108695945,108696324,108696871,108700133,108701710				4_108641601_G_A;4_108641465_A_C;4_108641464_AA_GC;4_108641464_AA_GC;4_108641464_A_G;	4_108641169_C_G;4_108640880_C_G;4_108641119_C_A;		4_108641300_T_C;	0.08663366336633663	4	-1	108511433	108641608
ENSG00000139318	ENSG00000139318	AFYLEGGFSK	Q16828	12_89832423_C_T	rs12303240	0.06492337969382367	0.00033546841901254526	11.0	5.057357139235496e-07	-0.3655564742384869	0.1085201062241071	-0.132403104670066	1.499708554921777	-0.052657360083794964	0.9725931802669152	0.0015096766561822827	False	89832423,89841717,89841947,89843044,89843687,89845285,89850966,89851033,89852954,89854338,89856004,89859608,89862452,89866054,89873975,89881935,89884687,89885471,89885473,89886325,89886761,89892151,89893197,89893348,89894103,89895461,89897706,89899103,89902219,89902335,89903205,89903633,89907010,89907474,89908984,89912351,89921681,89927357,89928199,89930626,89931193,89932662,89933373,89936012,899…								0.452970297029703	12	-1	89741009	89747048
ENSG00000139428	ENSG00000139428	AGPILELEQWIDK	Q96EY8	12_109888779_G_A	rs1477117	1.2376398411908284e-07	1.0860387103106464e-10	9.0	1.0202868784593528e-11	-0.9724241081876508	2.1220680482103056e-14	-0.9849461051067532	2.5236863417403396e-27	-1.3570588314214742	0.17922089824625506	0.13738309345344854	False	109888779,109889704,109890955,109891742,109891999,109892106,109892179,109893134,109893514,109893697,109893726,109893797,109894028,109894347,109894396,109894721,109895143,109895636,109895958,109896002,109896316,109896390,109897136,109897998,109898047,109898716,109898797,109898832,109900596,109901621,109901657,109901916,109902150,109902304,109902305,109902903,109902984,109903651,109903926,109904198…				12_109999068_G_A;12_109999037_G_A;12_109999005_G_A;12_109993298_C_T;12_109992149_C_G;12_109991998_A_G;	12_110009054_G_T;12_110007939_A_G;12_110006814_G_T;12_110004804_C_T;12_110003672_G_A;12_110002133_C_T;12_110001616_G_A;12_110000748_G_A;12_109999068_G_A;12_109999037_G_A;12_109999005_G_A;12_109997847_C_T;12_109996689_G_A;12_109995188_C_T;	12_110009054_G_T;12_110007939_A_G;12_110006814_G_T;12_110004804_C_T;12_110003672_G_A;12_110002133_C_T;12_110001616_G_A;12_110000748_G_A;12_109999068_G_A;12_109999037_G_A;12_109999005_G_A;12_109997847_C_T;12_109996689_G_A;12_109995188_C_T;		0.16584158415841585	12	-1	109991542	110011679
ENSG00000140043	ENSG00000140043	DVPYPPPLSPAIEAIQK	Q8N8N7	14_74309707_A_G	rs10873261	4.020288458973533e-09	2.08290104140987e-12	11.0	1.1874600170298634e-14	0.594529809880973	8.320964464255109e-17	0.6601424460531238	4.2709819788171296e-30	0.9047488236371888	1.426705450942524e-22	0.6901147527993488	False	74309707,74304529,74307246,74307394,74307866,74313107,74314588,74314836,74315412,74315513,74315644,74316330,74316848,74318645,74318754,74319203,74319242,74319625,74319721,74319989,74320051,74320094,74320648,74320841,74322053,74322205,74322716,74323380,74323382,74323473,74324440,74324671,74325016,74326724,74326966,74327100,74328156,74328643,74329567,74330463,74332456,74332809,74333428,74333894,743…		14_74350063_CT_C;14_74347121_CA_C;14_74336715_C_CAGAG;14_74335490_TA_T;14_74325016_GA_G;14_74320051_GT_G;	14_74318645_G_C;	14_74352656_C_G;14_74352314_G_T;14_74351109_G_A;14_74340797_A_T;14_74318754_G_T;14_74318645_G_C;	14_74350063_CT_C;14_74349313_C_T;14_74348594_A_C;14_74348590_A_G;14_74348563_T_G;14_74347554_A_C;14_74347121_CA_C;14_74344276_C_A;14_74342437_C_T;14_74341702_T_C;14_74340555_A_G;14_74340349_C_T;14_74338884_G_A;14_74338782_C_G;14_74338221_A_T;14_74337080_G_T;14_74337009_A_G;14_74336715_C_CAGAG;14_74336130_C_T;14_74335490_TA_T;14_74335215_A_G;14_74334027_T_C;14_74333894_A_G;14_74333428_A_T;14_74332…		14_74340797_A_T;	0.4752475247524752	14	1	74318547	74353530
ENSG00000140263	ENSG00000140263	AMGAAQVVVTDLSATR	Q00796	15_45290789_C_G	rs35948481	0.035864894912716265	8.297091878814341e-05	21.0	5.7879126160349155e-05	-0.3797777257157646	0.003196809294091298	-0.30873669290661	0.35390065804272625	-0.1840917322909605	0.0007755734140412651	-0.33166480449024466	False	45290789								0.10148514851485148	15	1	45315302	45369383
ENSG00000140400	ENSG00000140400	ILHDVELLSSLALAR	Q9NTJ4-4	15_75808731_G_A	rs8027802	0.03232584402634127	9.623362024216275e-05	16.0	1.3227776400271615e-07	-0.6339381242312725	0.11539765665908575	-0.17071799111979935	5.810266243504631e-27	-0.8438422370249536	0.4054253913920741	-0.05065678004023445	False	75808731,75647964,75666546,75681000,75682513,75684085,75692303,75706296,75723991,75727795,75728474,75728531,75730366,75732227,75737287,75739824,75742095,75743002,75755467,75755651,75762608,75764343,75766672,75768297,75768679,75783051,75784091,75784441,75789444,75791112,75792297,75799306,75802154,75803200,75807692,75808740,75808791,75808972,75810659,75811599,75812474,75812888,75813153,75814388,758…								0.2896039603960396	15	-1	75648133	75660971
ENSG00000140463	ENSG00000140463	AFEHLGNALTYDPTNYK	Q96RK4	15_73097221_T_A	rs34117151	0.07401634604737184	0.000454103133087117	10.0	4.604244457904193e-08	-0.5805173808851467	2.729187981522926e-06	-0.3744119376481744	1.1687558732052723	-0.1690199807970896	0.5544316960981993	0.027344675485847368	True	73097221,73096573,73100694,73100924,73104435,73104935,73105863,73106615								0.3836633663366337	15	1	72978527	73030817
ENSG00000140525	ENSG00000140525	DLQLLQGSK	Q9NVI1	15_89869733_A_G	rs2351000	0.0847586818683566	0.00010292605066907631	53.0	2.0884370682111645e-08	-0.7954398176753965	7.207452785171732e-08	-0.8498497162145279	0.038629846192051454	-0.2266520291262702	0.06203241427835196	-0.18428800262742304	True	89869733								0.09158415841584157	15	1	89787180	89860492
ENSG00000140575	ENSG00000140575	YQELINDIAR	P46940	15_91127715_C_T	rs8038442	0.09950038586244814	7.519044719875862e-05	92.0	7.788170264344754e-07	-0.458279443245764	0.012797501577391852	-0.2247177042784596	1.0316488226569938	-0.13730365701667005	0.004357835134994875	-0.15434494825040254	True	91127715,91114376,91114735,91115872,91116163,91116173,91118303,91119014,91120086,91122524,91129108,91130981,91130990,91130992								0.3143564356435644	15	1	90931450	91045475
ENSG00000140682	ENSG00000140682	GSLDTMLGLLQSDLSR	O43294-2	16_31476458_C_T	rs11150624	0.009394102351824123	8.683671253780227e-05	4.0	7.828398678377179e-08	0.4831039435484288	1.565888362973262e-08	0.5019190755314247	1.0166921680510785e-08	0.5399885321500829	6.5436058976434145e-18	0.658839326414252	False	31476458,31454952,31457210,31464078,31479200,31480318,31483622,31488916,31495671,31498364,31516210,31522008,31523412,31530669,31540631,31542271,31542415,31543840,31544427,31544476,31546720,31547427,31548012,31549634				16_31488916_C_G;	16_31483622_C_T;	16_31488916_C_G;		0.4356435643564357	16	1	31482906	31489281
ENSG00000140740	ENSG00000140740	NALANPLYCPDYR	H3BP04	16_22098662_T_C	rs72784941	1.4011659389595584e-06	6.858971494031147e-10	22.0	4.6295118699336985e-12	-1.2800702202159844	1.03756960261817	-0.10267597216978784	0.13552670368656333	-0.06040191270897397	0.7306041883097784	-0.02844904333987955	False	22098662								0.07178217821782178	16	1	21963981	21994981
ENSG00000140983	ENSG00000140983	SFAHCASVYK	Q8IXI1	16_718514_C_G	rs7204542	0.005838285033971119	9.447870616864093e-06	21.0	1.0495625741031952e-07	0.4678959861409338	5.68349988373281e-09	0.5068552924077112	0.001955156131636987	0.284191268453422	0.004638612403388936	0.14726145928221024	True	718514	16_718514_C_G;				16_718514_C_G;	16_718514_C_G;	16_718514_C_G;	0.2648514851485149	16	1	718086	724174
ENSG00000141295	ENSG00000141295	LQCTYIEVEQVSK	Q96FV2	17_45912302_C_T	rs11079797	2.8516297771622465e-06	3.1330795902551684e-09	11.0	1.7641227792886588e-12	-0.7653680006484844	9.575717757863768e-08	-0.5797990572868295	6.428435994265927e-13	-0.8571779013447078	2.875183002616156e-17	-0.8670387649849588	False	45912302,45929169,45930539,45930584,45931413,45932303,45936887,45937787,45937923								0.18811881188118806	17	-1	45915058	45918699
ENSG00000141376	ENSG00000141376	ILPAPQFGAQK	Q9H6U6-2	17_59352209_C_T	rs8082397	0.0648852991115659	0.0002628731412407241	14.0	2.7263496475241718e-06	-0.6393936431960117	0.0676885977538952	-0.18602540391270486	0.9276141063794568	-0.14667986304641328	0.3056040808755262	0.07018168441209692	False	59352209					17_59352209_C_T;			0.2945544554455445	17	1	58754814	59470199
ENSG00000141499	ENSG00000141499	LQLWWCGGAPDSSIPDDHQGEK	Q9BUR4	17_7599851_T_C	rs12950295	4.182266439400263e-08	2.1090422052053493e-11	14.0	1.3575115354457704e-18	-1.2394659791038585	0.00010460892639721877	-0.3285155244588087	0.041047035392184635	-0.23963693421572196	3.9426878206707495e-05	0.2790866231540932	True	7599851,7600926,7601188,7604471,7606722	17_7606722_C_G;	17_7606721_GC_G;		17_7606722_C_G;17_7606721_GC_G;	17_7604471_A_G;17_7600926_A_G;17_7599851_T_C;	17_7606722_C_G;17_7606721_GC_G;17_7604471_A_G;17_7600926_A_G;17_7599851_T_C;		0.21287128712871287	17	1	7589389	7606820
ENSG00000141504	ENSG00000141504	ADGFGDNPFYHCLVAEILPAPGK	Q96F10	17_7472733_C_T	rs12939472	0.0018021429482973587	1.676590400419929e-05	3.0	3.259946775000308e-10	-0.5305148345856083	1.0044793194602002e-09	-0.5575671746241557	5.565865821289071e-27	-0.5810593489330528	4.0747633641406625e-05	0.2993044490466943	False	7472733,7468688,7474992,7482779,7491910,7494345,7498191,7504060,7521287,7525548,7530147,7530271					17_7530271_C_T;17_7530147_G_C;		17_7530271_C_T;	0.4405940594059406	17	-1	7529552	7531194
ENSG00000141698	ENSG00000141698	AHNLLCQQK	Q969T7	17_39975164_C_T	rs11079015	0.042284240223503335	0.0002135209928720642	10.0	1.1209452861369924e-07	-0.5639893444191788	4.7432356849477914e-05	-0.3413339912621761	3.790640693571631e-47	-1.4572593873744957	1.7879955272711744e-33	-1.1751969736298908	False	39975164,39977734,39979062,39979081,39979082,39979267,39980819,39981131,39982151,39982264,39982361,39982990,39983644,39983808,39983820,39983849,39984162,39985493,39985586,39986484,39986654,39986754,39987361,39988601,39989073,39989573,39989592,39989662,39989766,39990357,39991790,39991988,39992584,39992623,39993222,39993485,39993748,39993771,39994879,39994907,39995305,39995453,39996137,39996172,399…	17_39983820_G_A;17_39983808_G_C;17_39983805_CCAGAGTTCT_C;	17_39989592_C_CA;17_39989573_AT_A;17_39983805_CCAGAGTTCT_C;			17_39991988_G_A;17_39991790_C_T;17_39990357_T_C;17_39989766_T_C;17_39989662_G_A;17_39989592_C_A;17_39989592_C_CA;17_39989587_TGAGAC_GAGACA;17_39989573_AT_A;17_39989073_C_T;17_39988601_C_T;17_39987361_G_A;17_39986754_T_C;17_39986654_G_A;17_39986484_C_T;17_39985586_C_T;17_39985493_T_C;17_39984162_T_C;17_39983849_G_C;17_39983820_G_A;17_39983808_G_C;17_39983805_CCAGAGTTCT_C;17_39983644_A_C;17_3998299…	17_39991988_G_A;17_39991790_C_T;17_39990357_T_C;17_39989766_T_C;17_39989662_G_A;17_39989592_C_A;17_39989592_C_CA;17_39989587_TGAGAC_GAGACA;17_39989573_AT_A;17_39989073_C_T;17_39988601_C_T;17_39987361_G_A;17_39986754_T_C;17_39986654_G_A;17_39986484_C_T;17_39985586_C_T;17_39985493_T_C;	17_39983849_G_C;	0.28465346534653463	17	-1	39981335	39992523
ENSG00000141959	ENSG00000141959	VFANAPDSACVIGLK	P17858	21_45581478_T_C		0.00013945756408248732	7.866971426386914e-08	35.0	0.0014868445533659453	0.326867648941632	0.9389202746199862	0.008410244993844351	0.17317843223106555	0.2049995225525668	0.8260246344681457	-0.023101434757498908	True	45581478								0.10891089108910892	21	1	45719934	45747259
ENSG00000142089	ENSG00000142089	EEHEVAVLGAPHNPAPPTSTVIHIR	Q01628	11_320836_C_T	rs34481144	9.689305027002856e-09	3.1304443667473624e-11	2.0	6.957941925220137e-14	-0.698142660560175	1.0706024445982922e-14	-0.7173023167408319	1.2914680838148275e-24	-1.0115638663934494	2.9486339738523126e-27	-0.9752711620275941	False	320836,323649				11_320836_C_T;	11_323649_C_T;11_320836_C_T;			0.4727722772277228	11	-1	319669	327537
ENSG00000142208	ENSG00000142208	EAPLNNFSVAQCQLMK	P31749	14_105088609_G_A	rs10137814	0.02933138467741175	0.00015092132836289402	9.0	3.172008463639654e-05	-0.7370180783353764	0.7888297502399302	-0.01980999649344195	3.1427763797246346e-05	-0.4190658154076359	0.28711604816729586	-0.06915051757190999	True	105088609,105088984,105090516,105090555								0.25	14	-1	105235686	105262088
ENSG00000143153	ENSG00000143153	YNPNVLPVQCTGK	P05026-2	1_169176590_T_C	rs1080266	0.0021085133698734147	6.029403686538247e-06	10.0	5.724799329766394e-09	-0.3959120293096421	4.71805806529726e-07	-0.3917069971825593	0.0002388285254324103	-0.2843204102957047	2.275902057491351e-08	-0.4550647477003943	False	169176590,169159866,169180857,169255192,169294976								0.4900990099009901	1	1	169074935	169101960
ENSG00000143198	ENSG00000143198	IASGLGLAWIVGR	Q5VV89	1_165599774_G_C	rs10800118	0.014731378506988125	9.842072114875796e-05	6.0	1.0315936263260089e-07	-0.41245596759767134	1.2835418235285266e-06	-0.3674536570289408	1.907429134523285e-18	-0.7438503714473201	1.2894743465567755e-18	-0.5860870461603439	False	165599774								0.4975247524752475	1	1	165600098	165631033
ENSG00000143337	ENSG00000143337	FESFPAGSTLIFYK	Q5JTV8	1_179852074_T_C	rs1281378	0.018733654695106888	4.549275964363708e-05	17.0	1.0990930993718632e-08	-0.4577792652130172	1.6802218355494158e-13	-0.7253540702237444	1.1654440405697916e-32	-1.2395600320901423	5.592350721959424e-32	-1.0939626653642287	False	179852074,179806890,179807281,179807938,179808322,179813352,179813499,179813613,179814457,179817654,179818132,179820868,179823825,179824377,179824405,179826030,179839548,179842107,179845022,179846123,179847635,179850543,179852552,179853096,179854797,179857781,179858333,179858444,179859333,179860683,179862404,179863237,179863796,179863922,179868470,179869700,179870919,179871712,179876988,179879039…	1_179876988_C_G;1_179852074_T_C;	1_179869700_TAA_T;1_179860683_TTTTATTTTTATTTATTTA_T;	1_179858444_G_A;	1_179894001_T_C;1_179893810_G_C;1_179893352_C_T;1_179892125_T_C;1_179892028_G_A;1_179891092_C_T;1_179888228_G_C;1_179887788_C_T;1_179887681_G_C;	1_179885939_A_G;1_179885433_A_G;1_179883494_G_A;1_179881004_A_C;1_179880917_A_C;1_179879604_T_A;1_179879185_C_T;1_179879039_C_T;1_179871712_G_A;1_179870919_A_C;1_179869700_TAA_T;1_179868470_G_A;1_179863922_C_T;1_179863796_C_A;1_179863237_G_T;1_179862404_A_C;1_179860683_TTTTATTTTTATTTATTTA_T;1_179859333_G_A;1_179858444_G_A;1_179858333_C_T;1_179857781_A_G;1_179854797_G_A;1_179853096_G_C;1_179852552…			0.3886138613861386	1	1	179851177	179894135
ENSG00000143387	ENSG00000143387	NSWGENWGNK	P43235	1_150658287_A_G	rs17599629	0.08798777912124127	0.005748633169821434	1.0	2.534031671916492e-05	0.7222607175922837	0.09076116184807316	0.3942631413537168	0.3376137252152327	0.01842909018521819	0.11640409499466285	-0.1023575647413674	False	150658287,150650194,150666860,150725401,150842696								0.2871287128712871	1	-1	150768684	150780799
ENSG00000143554	ENSG00000143554	ALAAAAADPEGPEGGCSLAWR	X6R3N0	1_153677569_G_C	rs75662150	0.007155085706309514	1.4079383677473415e-05	18.0	4.049956334309198e-09	-1.1332881101227468	0.07103529857832265	0.2311107446592571	0.463114516558899	-0.2556035553136378	0.04366938812845402	0.2432942309837911	False	153677569,153672721,153674787,153675529,153677056,153677298,153677849,153678621,153679188,153680428,153682291,153682533,153682552,153687227,153692450,153694472,153694697,153696147,153696371,153697106,153698069,153698703,153699201,153699235,153703124,153708633,153708906,153709971,153711911,153712383,153712425,153712791,153717182,153717878,153718338,153718340,153723037,153727632,153728330,153729120…							1_153748219_C_T;1_153747616_C_T;	0.08663366336633663	1	1	153746830	153752633
ENSG00000143621	ENSG00000143621	KGTMTTGHNVADLVVILK	Q12905	1_153611600_A_G	rs4845559	0.0226783039665491	3.51810472822498e-05	28.0	0.00011700196601135904	0.8746591724186885	0.13258927687661018	0.15544556171693247	0.2812729680450087	0.15588871239377486	0.06527544470738235	-0.10852312463784773	True	153611600,153620086								0.1311881188118812	1	-1	153634512	153643524
ENSG00000143622	ENSG00000143622	YYIDDVFHALVR	Q92963-3	1_155860611_G_T	rs78681289	0.09977006582064407	0.001741046679498375	4.0	1.2308251050611665e-05	-0.9212344037798088	0.01947739120893121	-0.4612930280976311	0.008707278682869985	-0.2876911497749952	0.003043072286363693	-0.351405466120698	False	155860611								0.07920792079207921	1	-1	155867599	155881195
ENSG00000143632	ENSG00000143632	DLYANNVMSGGTTMYPGIADR	P68133	1_229534893_G_A	rs571951	0.009129011576553384	0.0003350083466501027	1.0	2.5504417879270242e-08	0.8683980768569125	1.3829836091089317e-08	0.8343669280878321	4.395525794787734e-19	0.9916083136768141	2.8811313425895655e-20	0.9940498479114236	False	229534893,229535883,229536441,229536654,229536785,229541395,229542869,229545085,229545782,229545842								0.1707920792079208	1	-1	229566992	229569845
ENSG00000143740	ENSG00000143740	DVCIHTWPCTYYLEPK	A0A087X0B7	1_227935444_A_G	rs2236359	0.00022020597247194082	5.211421310146577e-07	9.0	3.895388460832415e-10	-1.0718284620071512	0.3187533729214407	-0.08354283153456432	1.4264591334702146e-05	-0.2470993505127891	7.316955237953978e-11	-0.3582174775742723	False	227935444,227922918,227929441,227936527,227938415,227955389,227957591,227959417,227963078,227963124,227970556,227976498	1_227935444_A_G;	1_227955389_CTT_C;		1_227922918_A_C;	1_227963124_G_T;1_227963078_C_T;1_227959417_C_T;1_227957591_C_T;1_227955389_CTT_C;1_227938415_G_A;1_227936527_G_T;1_227929441_C_T;1_227922918_A_C;1_227935444_A_G;			0.3787128712871287	1	1	227916240	227968927
ENSG00000143858	ENSG00000143858	TLNPYFNESFSFEIPFEQIQK	Q8N9I0	1_202680054_T_A	rs10800856	0.039218768786458316	0.0002775529543683438	7.0	2.2043705772937888e-07	0.4582192902279862	4.030165510039273e-08	0.4831442941936395	2.3519972769705237e-15	0.5514742770856853	5.310492808155753e-16	0.5638886782640448	False	202680054,202675543,202681263,202684857,202684868,202685803,202685917					1_202675543_A_G;			0.35396039603960394	1	-1	202559724	202679545
ENSG00000143924	ENSG00000143924	ASPSPQPSSQPLQIHR	B5MBZ0	2_42509554_A_G	rs10200353	0.05419862199734272	6.399804418740927e-05	45.0	2.5658810504652844e-08	-0.6249277216518365	0.02204546671625219	-0.30382049972602504	7.080300692660412e-08	-0.3198783530721673	0.059638533844468586	-0.20640449021639787	False	42509554,42378392,42385151,42385523,42385799,42386041,42387254,42387879,42387926,42388262,42388468,42392099,42394865,42395946,42398918,42400278,42400692,42401961,42406728,42407093,42408483,42409631,42409840,42412808,42413562,42413811,42414035,42414146,42414314,42415718,42419468,42419829,42420302,42420553,42424595,42425098,42429666,42436723,42436928,42437079,42441088,42442212,42444287,42451683,424…		2_42538887_CAG_C;2_42538886_TCA_T;2_42536389_TA_T;2_42492366_TAGG_T;2_42487670_AT_A;2_42484624_CCAAA_C;2_42461654_CA_C;2_42453564_CCGAGGCGGGCGGATCATGAGGTCAGGAGAT_C;2_42437079_AAAAC_A;2_42420553_TAA_T;2_42400692_TTAAATAAGTACCA_T;		2_42559288_A_G;	2_42555636_T_C;2_42555473_C_T;2_42551521_T_C;2_42548935_G_A;2_42546680_A_C;2_42543577_A_C;2_42542884_G_A;2_42541591_T_C;2_42538887_CAG_C;2_42538886_TCA_T;2_42538617_C_G;2_42537546_A_G;2_42537471_C_T;2_42536646_G_C;2_42536389_TA_T;2_42536389_T_A;2_42534896_C_T;2_42532912_G_A;2_42529818_C_T;2_42529700_G_T;2_42529339_C_T;2_42525582_C_G;2_42522042_G_A;2_42517859_G_A;2_42516884_C_G;2_42516372_G_C;2_42…			0.13613861386138615	2	1	42396490	42559688
ENSG00000144182	ENSG00000144182	RFDLLLDGQFK	Q9Y234	2_99759865_A_G	rs6726618	0.07967877110888437	0.0008406140544174507	6.0	2.337815974225253e-06	0.5242421418851912	0.04672768127287477	0.2124913887105037	3.6464124476730085e-24	0.9458560600686752	1.815574739887266e-19	0.7897479554835699	False	99759865,99704547,99705903,99706817,99708237,99708247,99709415,99715077,99715664,99717322,99717608,99718298,99719687,99723016,99723111,99725025,99725138,99725223,99725479,99727789,99728293,99730199,99730657,99731189,99731552,99732360,99732825,99737120,99737273,99737646,99738008,99738089,99738224,99738961,99738962,99740175,99742161,99744172,99745860,99747410,99747829,99749154,99749350,99750673,997…				2_99772875_T_C;2_99771590_G_T;	2_99776686_G_A;2_99775865_C_G;2_99773201_T_G;2_99772875_T_C;2_99772565_C_T;2_99771590_G_T;2_99771533_C_T;		2_99778985_T_C;	0.3589108910891089	2	1	99771418	99779620
ENSG00000144366	ENSG00000144366	MGLTLEGTVFCLDPLDSR	Q9UBP9	2_189185755_G_A	rs4381753	0.0037550913304215134	7.277075413813879e-06	16.0	1.1295217242209999e-08	-0.5734631680561109	2.525064678711129e-11	-0.5123919221228436	3.930653653270013e-18	-0.64889855509439	5.163035306437727e-21	-0.732219468657847	False	189185755,189154111,189158769,189160338,189161309,189164442,189166469,189167273,189167807,189168555,189169235,189171810,189172163,189173613,189177128,189177631,189177697,189181348,189185747,189190362,189192535,189199195,189202876,189206528,189206852,189207372,189213721,189214693,189216219,189233550,189237457,189240710,189242527,189246754,189253343,189260967,189261885,189271456,189281629,189287251…		2_189161309_A_AGT;		2_189158769_A_G;	2_189308601_G_A;2_189308284_A_G;2_189298660_C_T;2_189297751_C_A;2_189289487_A_G;2_189288305_A_G;2_189288234_G_C;2_189287251_C_T;2_189281629_G_A;2_189271456_G_A;2_189261885_C_G;2_189260967_G_T;2_189253343_A_G;2_189246754_A_G;2_189242527_C_T;2_189240710_G_A;2_189237457_C_A;2_189233550_T_C;2_189216219_T_C;2_189214693_A_G;2_189213721_T_A;2_189207372_A_G;2_189206852_A_G;2_189206528_A_G;2_189202876_A_G…			0.4702970297029703	2	1	189156396	189460653
ENSG00000144559	ENSG00000144559	ELYGSILQENPQVVYK	Q96BW9-3	3_11825712_T_C	rs7611833	1.3618020713173369e-12	2.3816275029711983e-16	13.0	6.351158678694401e-14	0.6826136793288896	1.7722501379311583e-14	0.6697846016402378	2.4966018537214308e-26	0.7514766532453707	1.9439908599069737e-15	0.7128911314018461	False	11825712,11819683,11820852,11821126,11822370,11822934,11823238,11823265,11824300,11824319,11824511,11827936,11828825,11829474,11830536,11831670,11832773,11839966,11840903,11840929,11841444,11842203,11842354,11842860,11842883,11843908,11845051,11845285,11846527,11847299,11849807,11850367,11851941,11853167,11853436,11853638,11856570,11859653,11860109,11864427,11865336,11868783,11872382,11878732		3_11868783_CT_C;	3_11849807_A_C;	3_11850367_G_T;	3_11878732_T_C;3_11872382_T_C;3_11868783_C_T;3_11868783_CT_C;3_11865336_G_T;3_11864427_G_A;3_11860109_A_G;3_11859653_G_C;3_11856570_A_G;3_11853638_C_G;3_11853436_C_G;3_11853167_T_C;3_11851941_A_C;3_11850367_G_T;3_11849807_A_C;3_11847299_C_G;3_11846527_A_G;3_11845285_G_C;3_11845051_A_G;3_11843908_A_G;3_11842883_A_G;3_11842860_T_C;3_11842354_T_C;3_11842203_G_A;3_11841444_C_G;3_11840929_C_T;3_118409…	3_11878732_T_C;3_11872382_T_C;3_11868783_C_T;3_11868783_CT_C;3_11865336_G_T;3_11864427_G_A;3_11860109_A_G;3_11859653_G_C;3_11856570_A_G;3_11853638_C_G;3_11853436_C_G;3_11853167_T_C;3_11851941_A_C;3_11850367_G_T;3_11849807_A_C;3_11847299_C_G;3_11846527_A_G;3_11845285_G_C;3_11845051_A_G;3_11843908_A_G;3_11842883_A_G;3_11842860_T_C;3_11842354_T_C;3_11842203_G_A;3_11841444_C_G;3_11840929_C_T;3_118409…		0.452970297029703	3	-1	11831916	11888393
ENSG00000144712	ENSG00000144712	GWLEAMEEPTQTGSNLHMLR	O75155	3_12758101_A_G	rs13094512	0.0009948418340438212	8.825597138035082e-07	29.0	2.029932799221158e-06	-1.074420132390864	0.6024013619826685	-0.0612456157115564	0.7186090532078278	-0.16525657044575706	0.0946890574635212	0.2297581737794445	False	12758101,12749900								0.15594059405940594	3	1	12837971	12913415
ENSG00000145194	ENSG00000145194	YQGAADSAPYDWFGDFSSFR	O60344-4	3_183976103_C_T	rs11546878	3.8297384190830736e-05	1.3289746817447548e-07	5.0	1.7517787971451296e-12	-1.1617296852652113	0.0006863416325501427	-0.7613091729150228	0.30728291123594625	-0.34341188887971524	0.234872497301379	-0.11107330575925586	False	183976103								0.13366336633663367	3	1	183967438	184010819
ENSG00000145220	ENSG00000145220	EQDQRPLHPVANPHAEISTK	Q9NX58	4_4276475_C_A	rs2272739	1.2376398411908284e-07	5.388381246432758e-11	18.0	1.6978150024333567e-22	-1.7355326732287766	4.986627916176117e-05	-0.5700704471305098	0.12964359287876676	-0.07120382221282992	0.5135965747530035	0.05464414394590687	True	4276475	4_4276475_C_A;							0.08168316831683169	4	-1	4269428	4291896
ENSG00000145241	ENSG00000145241	SFSTLFLETVK	Q03188	4_68502990_A_G	rs354870	0.07131392585866203	0.00028387897573668665	15.0	1.7769884727228734e-06	0.7986115007102791	0.0002170507672933288	0.6310046751151115	0.1911281391390539	0.4083000568627671	0.9061766001117468	-0.012953061657916142	True	68502990,68478038,68480599,68486981,68496080,68501763,68502100,68503337,68515155,68517779,68537047,68547774,68551171,68557541,68566467,68572052,68581837,68598205,68598694								0.056930693069306926	4	-1	68337521	68411324
ENSG00000145439	ENSG00000145439	AAAGDLGGDHLAFSCDVAK	Q8N4T8	4_169923584_C_T	rs11730894	0.018733654695106888	0.00012888984881958407	6.0	1.4891260847320984e-07	0.4428722371746117	0.004215684722498246	0.242993770379406	0.00012172628980688547	0.3117886892815792	0.0001908767683773817	0.2475375821181295	False	169923584,169772758,169774552,169811757,169812313,169812782,169813024,169814663,169814671,169816146,169818494,169819067,169822105,169822998,169823383,169823507,169829099,169829345,169831950,169835048,169838771,169839372,169841518,169844737,169844774,169845078,169845079,169846255,169846359,169853125,169854046,169857479,169860164,169862888,169864781,169865538,169866291,169867064,169867760,169870173…	4_169928842_G_T;	4_169918253_CT_C;4_169916763_CT_C;4_169900704_CGG_C;4_169897301_TAGTCAA_T;4_169867760_AAT_A;4_169846359_GCT_G;4_169845079_CACT_C;4_169845078_TCAC_T;4_169845078_TCAC_T;4_169844734_TGTC_T;		4_169931288_T_C;4_169928842_G_T;4_169922504_C_T;4_169910101_C_T;	4_169929378_A_G;4_169928842_G_T;4_169928655_G_A;4_169926799_G_A;4_169923672_T_G;4_169922504_C_T;4_169919092_T_C;4_169918253_CT_C;4_169917754_T_C;4_169917245_T_C;4_169916763_CT_C;4_169915975_A_G;4_169915876_C_G;4_169915797_A_G;4_169915589_G_T;4_169914430_A_C;4_169911596_A_T;4_169910101_C_T;4_169908194_T_G;4_169904452_A_G;4_169904199_G_A;4_169903609_T_C;4_169901225_A_G;4_169900720_C_T;4_169900704_C…	4_169931288_T_C;4_169929378_A_G;4_169928842_G_T;4_169928655_G_A;4_169926799_G_A;4_169923672_T_G;4_169922504_C_T;4_169919092_T_C;4_169918253_CT_C;4_169917754_T_C;4_169917245_T_C;4_169916763_CT_C;4_169915975_A_G;4_169915876_C_G;4_169915797_A_G;4_169915589_G_T;4_169914430_A_C;4_169911596_A_T;4_169910101_C_T;4_169908194_T_G;4_169904452_A_G;4_169904199_G_A;4_169903609_T_C;4_169901225_A_G;4_169900720_C…		0.2202970297029703	4	-1	169784921	169931426
ENSG00000145675	ENSG00000145675	IFEEQCQTQER	P27986	5_67497594_C_G	rs7714383	0.09750086379155797	0.0016858770872179162	4.0	8.862919635334914e-07	-0.5894345355179125	0.0002073985038555656	-0.3332139206591829	1.5655858382148628e-24	-0.7122265863530926	2.496971582970063e-25	-0.7161001262191652	True	67497594,67501864,67501872,67503533,67504298,67508511,67509580,67509801,67512000,67515602,67517646,67518283,67520226		5_67518283_T_TAAG;			5_67520226_G_A;5_67518283_T_TAAG;5_67517646_T_G;5_67515602_T_C;5_67512000_C_G;			0.4554455445544554	5	1	67511548	67597649
ENSG00000145725	ENSG00000145725	ALADIVIPQEYGITK	O43314-2	5_102383004_G_T	rs59825095	7.628670235756626e-14	4.762684905082411e-18	23.0	1.8544991252718844e-23	0.9672873293541668	1.8165509848978878e-31	1.1149567240876666	3.0141595613608374e-34	0.9764639404587336	3.572833415943508e-42	1.1031944613284221	False	102383004,102241341,102280302,102293853,102295070,102296593,102301368,102305065,102305628,102306061,102306322,102306779,102306855,102307471,102307592,102309524,102312538,102313683,102313939,102314057,102314227,102316606,102317042,102317117,102317418,102318974,102319037,102321905,102322448,102323766,102324360,102324397,102325618,102325878,102326696,102327463,102327868,102327869,102328051,102328490…		5_102543730_TTTGTTTTTG_T;5_102540531_T_TTA;5_102540036_C_CCTAG;5_102512853_CAT_C;5_102512853_CA_C;5_102512345_ATGT_A;5_102493405_C_CA;5_102481486_C_CAGTT;5_102479504_C_CCACA;5_102473615_C_CTT;		5_102547302_C_T;5_102545693_A_G;5_102545163_T_G;5_102543878_A_G;5_102543730_TTTGTTTTTG_T;5_102540531_T_TTA;5_102540522_C_T;5_102540366_A_G;5_102540201_A_G;5_102540036_C_CCTAG;5_102538752_T_C;5_102537379_A_G;	5_102534629_T_A;5_102531919_C_T;5_102531808_G_A;5_102529719_T_C;5_102529401_G_A;5_102528092_T_C;5_102526175_T_C;5_102518795_A_G;5_102512853_CAT_C;5_102512853_CA_C;5_102512803_C_T;5_102512447_C_G;5_102512345_ATGT_A;5_102510923_T_C;5_102507812_T_C;5_102506864_G_C;5_102499144_A_G;5_102498881_G_T;5_102493405_C_CA;5_102491502_A_G;5_102489511_T_G;5_102488571_T_C;5_102486723_G_C;5_102481486_C_CAGTT;5_10…		5_102520400_A_C;	0.2797029702970297	5	1	102455853	102548500
ENSG00000145882	ENSG00000145882	VQIDVYEK	Q8NBM8	5_148758027_G_T	rs2227447	0.0009061001421763773	3.8129139244389054e-06	6.0	2.3565957118025866e-09	0.4083393305404528	8.052242864149417e-06	0.3749752802182829	1.0337049981116414e-14	0.6844524133264956	7.433900566557803e-24	0.7108885420873455	False	148758027,148725225,148726146,148734465,148737290,148737644,148757433,148757434,148767209,148769526,148769533,148771975,148773737,148774984,148775221,148775444,148775670,148775729,148776113,148776547,148777332,148777608	5_148737644_G_C;					5_148737644_G_C;		0.2896039603960396	5	1	148737570	148749216
ENSG00000146085	ENSG00000146085	CLAALTECAASGDGNILALAVDASR	P22033	6_49443027_A_G		0.0058854628466081535	7.828070262008619e-06	26.0	2.222882861328124e-10	-0.9116100899009524	0.04307247515093173	0.1543983587687403	4.373490358892978e-05	0.23610975972218265	3.620218124282456e-05	0.31557151594072763	False	49443027,49348012,49348294,49350501,49353357,49361117,49368844,49370984,49372496,49372802,49373070,49373125,49373403,49373808,49374450,49374689,49374920,49376063,49376846,49376924,49377094,49377819,49378192,49380020,49380121,49380199,49380899,49382639,49382808,49384747,49385806,49386446,49386512,49387154,49393275,49395977,49396453,49398333,49399239,49400045,49400326,49400795,49405822,49406925,494…	6_49412433_C_G;	6_49421240_AG_A;6_49415351_TA_TAA;6_49405822_C_CCTT;6_49399572_GTTGAAAGAATGTGTTTAATTAATAAGAGCCACTATTTCCATTTTCACGGAAATAAAACCCTATCCTTTCTTCTTTGTCACTCAATTACCCAAAACCTTCTCAACTGGTATACTACTGGCATTTGGGGCTAAAAAATTCTTCCTTGATTGGGAGTGCTACTAATAGTCATCAGCACCAGCCTCCCAGCCCAAGTTATTTAAAAAACAAAACACTCCGCCCATTTTCTAAATGCCTCTATGTGTTGCTTGTGGTAGGAAGCTGGATATCCTGACTGAGAACTTCTGAGCCTTAAGCCATAATTTTCTCTCACCTAAATTTTCACTAGTTGTCATTAT…	6_49399572_GTTGAAAGAATGTGTTTAATTAATAAGAGCCACTATTTCCATTTTCACGGAAATAAAACCCTATCCTTTCTTCTTTGTCACTCAATTACCCAAAACCTTCTCAACTGGTATACTACTGGCATTTGGGGCTAAAAAATTCTTCCTTGATTGGGAGTGCTACTAATAGTCATCAGCACCAGCCTCCCAGCCCAAGTTATTTAAAAAACAAAACACTCCGCCCATTTTCTAAATGCCTCTATGTGTTGCTTGTGGTAGGAAGCTGGATATCCTGACTGAGAACTTCTGAGCCTTAAGCCATAATTTTCTCTCACCTAAATTTTCACTAGTTGTCATTATGTGTGTTAAATTTAGTATGATGTGATAAGTTTGAGCCTAAAAAACTATTTTC…	6_49399239_AT_A;	6_49430082_C_G;6_49429264_C_T;6_49428755_G_A;6_49428360_G_C;6_49427918_A_G;6_49427655_A_G;6_49421241_G_A;6_49421240_AG_A;6_49420946_T_G;6_49420758_T_G;6_49420248_A_G;6_49419864_A_G;6_49416825_T_C;6_49415351_TA_TAA;6_49415043_C_T;6_49414235_T_G;6_49411619_A_G;6_49411477_G_C;6_49409737_T_C;6_49409487_G_C;6_49406925_T_C;6_49405822_C_CCTT;6_49400795_G_T;6_49399572_GTTGAAAGAATGTGTTTAATTAATAAGAGCCACTAT…			0.35148514851485146	6	-1	49398073	49430904
ENSG00000146530	ENSG00000146530	YNTEEYGTSIEDILSVLK	Q8N2E2	7_12428803_G_A	rs848016	6.760938981252027e-06	9.708180899249052e-09	9.0	8.838870118111878e-14	-0.8608047138251309	5.8636779268986685e-15	-0.6444636974194591	7.048135671036137e-33	-0.9718492275235768	3.268043204268691e-33	-1.0247281820709724	False	12428803,12404475,12406186,12418514,12418863,12418938,12422721,12429112,12434771,12435765,12439392,12458629,12468233,12469510,12470236,12470535,12471749,12475868	7_12428803_G_A;				7_12439392_A_C;7_12435765_C_T;7_12434771_T_C;7_12429112_T_C;7_12422721_T_C;7_12418938_G_C;7_12418863_C_T;7_12418514_C_G;7_12406186_G_A;7_12404475_C_G;	7_12439392_A_C;7_12435765_C_T;7_12434771_T_C;7_12429112_T_C;7_12422721_T_C;7_12418938_G_C;7_12418863_C_T;7_12418514_C_G;7_12406186_G_A;7_12404475_C_G;7_12428803_G_A;		0.4678217821782178	7	-1	12370511	12443567
ENSG00000146540	ENSG00000146540	SGAELALDYLCR	Q9BRJ6	7_1195796_T_C	rs12702434	9.63474407018634e-07	1.127275176068496e-09	9.0	5.784173526389032e-14	-0.7747980451494236	1.4185023242408039e-15	-0.8652484374236218	2.8429072238833605e-16	-0.8733890359643103	4.809490030036802e-05	-0.3286716202820073	False	1195796								0.4702970297029703	7	-1	1036622	1177896
ENSG00000146701	ENSG00000146701	VDFPQDQLTALTGR	P40926	7_75748660_T_C	rs11769586	1.4481484623248824e-05	1.1126764981366748e-08	19.0	4.806600646547835e-13	-0.6530449542891432	3.046262371372296e-17	-0.7956792867876761	1.6695586082190182e-26	-0.7206686700911233	1.033241729865048e-29	-0.6943854205977464	False	75748660,75611149,75611355,75613998,75622281,75628101,75628669,75629533,75630274,75631697,75631913,75636240,75642107,75651665,75651814,75653944,75654632,75657719,75658197,75659815,75662056,75662604,75663203,75668172,75668329,75670141,75670988,75672711,75676987,75676988,75677016,75677065,75677504,75678644,75678735,75680026,75681094,75683581,75685047,75685568,75685593,75688596,75688623,75688954,756…	7_75677504_C_T;	7_75694345_TC_T;		7_75696606_G_C;7_75696420_A_G;7_75696188_T_G;7_75677504_C_T;	7_75694345_TC_T;7_75694079_T_G;7_75693963_T_C;7_75693009_C_T;7_75692927_C_T;7_75688954_A_G;7_75688623_C_T;7_75688596_C_T;7_75685593_G_T;7_75685568_C_T;7_75685047_A_C;7_75683581_T_C;7_75681094_G_A;7_75680026_G_A;7_75678735_G_A;7_75678644_G_A;			0.33663366336633666	7	1	75677369	75696826
ENSG00000146729	ENSG00000146729	ICQEVLPK	O75323	7_56047572_C_T	rs60160896	0.07518532009794933	0.0004261158503054772	11.0	5.099967417792708e-07	-0.3561817439279206	5.696755940801361e-07	-0.3710299906058728	2.177081404103073e-12	-0.4055847255390117	1.1664118443784553e-11	-0.4017138749015965	False	56047572,56035682,56040001,56043606,56044449,56057940,56066079	7_56047572_C_T;				7_56066079_G_A;7_56057940_G_A;7_56044449_C_T;7_56043606_T_C;7_56035682_A_G;7_56047572_C_T;	7_56066079_G_A;7_56057940_G_A;7_56044449_C_T;7_56043606_T_C;7_56035682_A_G;7_56047572_C_T;		0.4554455445544554	7	1	56019486	56067874
ENSG00000146826	ENSG00000146826	LVWTPEHAQAGK	Q8WVR3	7_99926308_T_C	rs117787328	0.019351524174614814	0.0004005999380409672	2.0	6.062156773120643e-06	0.9657797762929752	0.3107938237126675	0.17084174810833969	0.1655770343299193	0.16456652576328948	0.6523302995986957	-0.0278535799026956	False	99926308,99894971,99895309,99897475,99901602,99904969,99905325,99905475,99905684,99917416,99920588,99925211,99926522,99926811,99927416,99927436,99930447,99934008,99934192,99934453,99935097,99936427,99937481,99937803,99937941,99937942,99938864,99939321,99940630,99943283,99946385,99947657,99947897,99950297,99950508,99951315,99952828,99952970,99953786,99954393,99954457,99955364,99955866,99956436,999…								0.1707920792079208	7	-1	99752043	99756338
ENSG00000146909	ENSG00000146909	LFISHFLLK	Q5C9Z4	7_156746069_G_A	rs59918059	0.09977006582064407	0.0003169129768145166	22.0	3.623533349622523e-07	-0.4579725596525508	1.914268918464876e-05	-0.3844833156925125	6.169749076887312e-20	-0.4301285567362728	2.1099222320601445e-09	-0.3848368179276273	False	156746069,156742274,156747182,156748886,156748910,156749283,156750236,156750427,156750695,156750843,156750945,156751230,156751365,156751377,156751997,156752018,156752077,156752231,156757145,156760485,156761137,156761751,156761818,156761913,156762224,156762248,156762446,156763188,156763248,156763346,156763550,156763588,156763589,156763602,156764039,156764072,156764269,156764279,156764431,156764766…	7_156762248_G_A;7_156762224_G_C;7_156761818_G_A;	7_156765797_A_ATC;7_156765242_CA_C;7_156765156_GT_G;7_156761750_AC_A;7_156750427_CCACTG_C;7_156748886_C_CA;7_156747182_TTTTGCTTAAC_T;	7_156762224_G_C;	7_156765797_A_ATC;7_156765797_A_C;7_156765455_C_T;7_156765243_A_G;7_156765242_CA_C;7_156765156_GT_G;7_156765043_C_A;7_156764972_G_A;7_156764887_G_A;7_156764766_A_C;7_156764431_T_G;7_156764279_A_G;7_156764072_T_C;7_156764039_T_C;7_156763589_A_T;7_156763588_CA_TT;7_156763588_CA_TT;7_156763588_C_T;7_156763550_A_G;7_156763346_T_C;7_156763248_C_T;7_156763188_T_C;7_156762446_G_T;	7_156761913_C_T;7_156761751_C_T;7_156761750_AC_A;7_156761137_C_T;7_156760485_A_G;7_156757145_G_C;7_156752231_T_C;7_156752077_G_A;7_156752018_G_A;7_156751997_C_T;7_156751377_T_C;7_156751365_T_A;7_156751230_G_A;7_156750945_C_T;7_156750843_G_A;7_156750695_G_A;7_156750427_CCACTG_C;7_156750236_G_A;7_156749283_G_A;7_156748910_A_T;7_156748886_C_CA;7_156747182_TTTTGCTTAAC_T;7_156746069_G_A;			0.4381188118811881	7	1	156742417	156765876
ENSG00000147548	ENSG00000147548	VGTYPWWPCMVSSDPQLEVHTK	Q9BZ95	8_38459779_G_A	rs327936	0.07366129750870541	0.0001951169433520309	23.0	4.219632789825764e-06	1.1952808040257596	0.8417512921095435	0.015264562014655425	0.11332547646515295	0.040701625772424026	0.06687919040114877	-0.0968302770586622	False	38459779								0.4628712871287129	8	-1	38127215	38239790
ENSG00000147679	ENSG00000147679	KAPDTQSSASEK	Q9BRU9	8_117787484_C_G		0.0006208130471430073	2.9566063511178274e-06	5.0	5.799298729400718e-09	1.3194071915450127	0.019175822814926344	0.4175413762942841	0.1949697184464724	0.2952321737054561	0.00027572438573557627	0.2977130616970071	False	117787484,117679601,117683144,117687616,117703509,117703931,117707419,117712032,117714117,117715585,117715731,117735099,117735209,117765090,117770204,117773826,117773987,117783975,117787572,117790906,117791502,117791733,117792736,117796195,117797872,117799012,117799487,117799586,117799587,117801191,117802148	8_117791733_T_C;	8_117801191_C_CA;		8_117799012_A_G;	8_117802148_T_C;8_117801191_C_A;8_117801191_C_CA;8_117799587_A_C;8_117799587_AA_GC;8_117799586_AA_GC;8_117799586_A_G;8_117799586_AA_GC;8_117799487_C_A;8_117799012_A_G;8_117797872_A_G;8_117796195_C_T;8_117792736_T_C;8_117791733_T_C;8_117791502_A_G;8_117790906_C_T;8_117787572_C_G;8_117787484_C_G;	8_117802148_T_C;8_117801191_C_A;8_117801191_C_CA;8_117799587_A_C;8_117799587_AA_GC;8_117799586_AA_GC;8_117799586_A_G;8_117799586_AA_GC;8_117799487_C_A;8_117799012_A_G;8_117797872_A_G;8_117796195_C_T;8_117792736_T_C;8_117791733_T_C;8_117791502_A_G;8_117790906_C_T;8_117787572_C_G;8_117787484_C_G;	8_117791733_T_C;	0.08415841584158416	8	1	117778742	117861702
ENSG00000147853	ENSG00000147853	AVIMGAPGSGK	Q9UIJ7	9_4732757_A_C	rs7861716	0.0006563793670101353	1.0014164089241624e-06	16.0	3.365485817828595e-10	-0.4559443512131375	9.307724679179024e-11	-0.5443712324523178	1.83920236965952e-10	-0.463742699894095	5.048637214930657e-13	-0.5005291793825374	False	4732757					9_4732757_A_C;			0.3787128712871287	9	-1	4711155	4742043
ENSG00000148175	ENSG00000148175	NLSQILSDREEIAHNMQSTLDDATDAWGIK	P27105	9_123855047_T_G	rs183454635	0.04539373308876838	0.00025710622227294923	9.0	1.326241091870562e-05	-0.7600918512388216	0.6218612452270114	0.06729194085383616	0.769796059059367	-0.08101489586751244	0.35879875900132985	-0.06612672412402805	False	123855047								0.12871287128712872	9	-1	124101355	124132531
ENSG00000148290	ENSG00000148290	VLAEPVPLPADPMELK	Q15526	9_136242669_T_C	rs1179041	0.0053806940294796645	4.4425976790008005e-05	4.0	4.367955410083638e-09	-0.5721962629277402	1.5099872223569506e-07	-0.5044996339893302	1.4219117143103113e-17	-0.8380689577916415	3.351625034555021e-19	-0.8117723631568089	True	136242669,136194812,136195734,136195736,136197278,136197286,136197834,136200810,136205775,136212369,136218590,136218591,136221213,136222490,136223366,136238509,136241189,136241639,136249929,136264493,136267371,136270996,136272618,136281753,136284450					9_136222490_A_G;9_136221213_C_T;			0.4777227722772277	9	-1	136218610	136223552
ENSG00000148334	ENSG00000148334	LQDNVREDLYEAADK	Q9H7Z7	9_130884753_C_T	rs13283456	0.0015167229777867186	2.1492393392366417e-06	19.0	3.762801725126203e-10	-0.9495704952843164	0.7057291696690642	-0.033836449962787014	5.2136395908325636e-08	-0.23735811252850905	0.7376286769540833	0.0174011536607851	False	130884753	9_130884753_C_T;							0.2103960396039604	9	-1	130882972	130890741
ENSG00000148572	ENSG00000148572	DPDTLLYLLQQK	Q96F24	10_65094117_A_C		0.04050107234334496	0.00022562521521361383	9.0	4.37575946073761e-06	0.6834473790184301	0.9675344391679775	0.004322925372090669	1.8044185308538307	0.016273714673525355	0.5157133340488365	0.04964374194980637	False	65094117,64920588,65068369								0.17574257425742573	10	1	64893050	64914783
ENSG00000148690	ENSG00000148690	EYCIADLSK	Q70Z53	10_95497329_T_C		0.06392093031472716	0.0004469020418098945	8.0	3.384168132791466e-07	-0.4942190906488402	4.6270463634496976e-09	-0.4157033997480637	1.1751189788040249e-05	-0.3788988989204569	0.0002721841637164657	-0.22064625702963814	False	95497329,95427281,95428388,95430878,95431509,95435201,95435898,95437088,95437132,95439125,95439373,95439700,95439916,95442708,95442876,95443113,95443688,95444089,95444931,95445299,95445494,95445638,95447477,95447683,95447785,95449496,95452132,95453026,95453187,95454449,95454681,95454768,95456030,95456155,95456171,95457334,95458141,95458332,95458532,95458897,95459403,95459698,95460653,95463012,954…	10_95454681_G_C;	10_95458332_AT_A;10_95454768_TA_T;10_95447683_TCACA_T;10_95445299_CA_C;10_95443113_CT_C;10_95442708_T_TG;		10_95428388_A_G;	10_95460653_T_A;10_95459698_G_C;10_95459403_T_C;10_95458897_G_A;10_95458532_A_G;10_95458332_AT_A;10_95457334_A_G;10_95456171_T_C;10_95456155_C_A;10_95456030_C_T;10_95454768_TA_T;10_95454449_C_T;10_95453187_T_C;10_95453026_T_G;10_95452132_T_C;10_95449496_A_C;10_95447785_G_A;10_95447683_TCACA_T;10_95447477_C_G;10_95445638_A_C;10_95445494_C_A;10_95445299_CA_C;10_95444931_T_G;10_95444089_T_G;10_95443…		10_95458141_A_G;	0.4876237623762376	10	-1	95427640	95462329
ENSG00000148773	ENSG00000148773	LGTTAGQMCSGLPGLSSVDINNFGDSINESEG	P46013-2	10_129901726_C_T		6.8036563634458475e-12	1.5348289189121366e-16	122.0	8.004603598325352e-22	-1.283723667148538	1.3545796939283475e-09	-1.404291508759965	0.13416130174845958	-0.28582588740731063	0.03565730602016374	0.11651623228466305	False	129901726,129894391,129901393,129901722,129901825,129901946,129902158,129904477,129906468,129907544,129911856	10_129911856_C_G;10_129907544_G_C;10_129904477_C_T;10_129902158_C_T;10_129901946_T_G;10_129901825_T_C;10_129901393_T_C;10_129901726_C_T;						10_129906468_C_T;10_129901722_G_A;	0.17326732673267325	10	-1	129894923	129924649
ENSG00000148834	ENSG00000148834	LNECVDHTPK	P78417	10_106004999_G_A		4.441099346234328e-05	6.172678834706818e-08	13.0	1.7264548715223984e-11	-1.0240447245813675	8.392407139258328e-14	-1.2850188614297902	0.6282123574299318	-0.3160927752758718	0.5491035031031828	0.07024776826631912	False	106004999,106006518,106008738,106008791,106009034								0.061881188118811874	10	1	105995114	106027217
ENSG00000149089	ENSG00000149089	YLIPELCK	Q96GX9	11_34892271_A_G	rs72924541	1.7989593915570643e-12	3.3117504285804887e-16	13.0	2.026052216601532e-22	-0.8980361613871115	9.271866761976083e-17	-0.8064343354507111	1.4698667191389153e-38	-1.3260652189533093	0.03498333237671459	0.13937398004451804	False	34892271,34859150,34859996,34860199,34860583,34860858,34861897,34863660,34863718,34864506,34865017,34865133,34865421,34865504,34865544,34865647,34866220,34868267,34869181,34869267,34869328,34869548,34870111,34870234,34870418,34872236,34872292,34872548,34872769,34872799,34872901,34874295,34874360,34874815,34874906,34874914,34875949,34876176,34876507,34876562,34878809,34879542,34885522,34890657,348…	11_34916657_C_T;	11_34918540_CACA_C;11_34907616_CTCCT_C;11_34907615_ACTC_A;11_34906626_CTATAA_C;11_34899168_TAG_T;11_34874914_CT_C;	11_34916657_C_T;	11_34876562_C_T;11_34876507_C_G;11_34876176_C_T;11_34875949_G_C;11_34874914_CT_C;11_34874906_T_G;11_34874815_G_A;	11_34936820_C_A;11_34935433_C_T;11_34935239_T_C;11_34934321_G_A;11_34933536_C_T;11_34932469_A_C;11_34931349_A_T;11_34927422_G_T;11_34926338_C_T;11_34923321_T_C;11_34918570_G_A;11_34918540_CACA_C;11_34917272_C_T;11_34916367_T_C;11_34911870_C_T;11_34911691_C_T;11_34907616_CTCCT_C;11_34907615_ACTC_A;11_34906626_CTATAA_C;11_34905987_T_C;11_34899168_TAG_T;11_34899070_C_T;11_34899012_T_C;11_34897445_T_…	11_34911870_C_T;11_34911691_C_T;11_34907616_CTCCT_C;11_34907615_ACTC_A;11_34906626_CTATAA_C;11_34905987_T_C;11_34899168_TAG_T;11_34899070_C_T;11_34899012_T_C;11_34897445_T_C;11_34896165_G_A;11_34893286_A_G;11_34890657_A_G;11_34885522_G_A;11_34879542_T_C;11_34878809_A_G;11_34876562_C_T;11_34876507_C_G;11_34876176_C_T;11_34875949_G_C;11_34874914_CT_C;11_34874906_T_G;11_34874815_G_A;11_34892271_A_G;		0.2797029702970297	11	-1	34874641	34938046
ENSG00000149115	ENSG00000149115	DWTSDVNVK	Q9C0C2	11_57074390_T_G		0.0688397022610341	6.090661558153868e-05	66.0	5.3437351599560857e-08	-0.9630464759268916	0.010667287118986608	-0.476058209452192	0.1160913052162	-0.1771418247062289	0.5615563476664904	-0.07434616147971257	False	57074390					11_57074390_T_G;	11_57074390_T_G;		0.04950495049504952	11	-1	57067112	57092426
ENSG00000149311	ENSG00000149311	VDHTGEYGNLVTIQSFK	Q13315	11_108045956_C_T	rs11212538	0.002557622679782942	1.139431132827334e-06	65.0	2.4390806667769617e-12	-0.5962055813326832	6.910116283200434e-07	-0.4535015100246526	7.400197432155304e-05	-0.2694620254945884	2.1752000682430226e-10	-0.27827969025749405	True	108045956,108019887,108021205,108021226,108022061,108022234,108023284,108024336,108025214,108027060,108029109,108031294,108033955,108034124,108040104,108041897,108043988,108048446,108048541,108051112,108051300,108052191,108053887,108054500,108054604,108054922,108056708,108057430,108057856,108059000,108059569,108061808,108064935,108065708,108066130,108066362,108067234,108069239,108075161,108075271…		11_108204945_GT_G;11_108196712_CATT_C;11_108185181_AT_A;11_108183413_ACT_A;11_108170042_CT_C;11_108170039_TCTC_T;11_108166958_TC_T;11_108165406_GC_G;11_108165406_GC_G;11_108156048_CT_C;11_108121410_CTT_CTTT;11_108111429_TA_T;11_108107261_T_TA;		11_108239628_G_T;11_108237839_C_T;11_108236783_G_T;11_108093833_G_A;	11_108233800_C_A;11_108227965_G_A;11_108226855_A_T;11_108226025_A_G;11_108225661_A_G;11_108225483_C_T;11_108223391_T_C;11_108222801_C_A;11_108221665_C_G;11_108221483_G_C;11_108221482_AG_GC;11_108221482_A_G;11_108221482_AG_GC;11_108221099_A_C;11_108219420_G_A;11_108219339_C_A;11_108218905_T_C;11_108218196_T_C;11_108217049_T_G;11_108215095_A_G;11_108212692_G_C;11_108212093_A_C;11_108211412_T_G;11_1…	11_108186258_G_A;11_108185478_C_T;11_108185181_AT_A;11_108185023_G_A;11_108184841_A_G;11_108184594_G_A;11_108183413_ACT_A;11_108182069_G_A;11_108181511_A_C;11_108177538_C_T;11_108174191_C_T;11_108174173_G_A;		0.4356435643564357	11	1	108093211	108239829
ENSG00000149357	ENSG00000149357	TASNIIDVSAADSQGMEQHEYMDR	Q6IAA8	11_71914530_T_G	rs11235467	0.08550607007906576	0.0009208503418829627	6.0	7.728545799509195e-05	-0.7054282736424591	0.1769958760575189	-0.17603053276237546	0.03001265591076855	-0.33932753592287856	0.8077250239503597	0.016563807827989472	False	71914530,71905706,71906129,71907482,71909148,71914724,71918463,71924434								0.11386138613861388	11	-1	71796941	71814433
ENSG00000150456	ENSG00000150456	IACVSAPSVYQK	Q8WVE0	13_21304584_T_C	rs7985361	1.7396715715508083e-06	9.575791826174128e-09	2.0	3.1716469333773706e-12	-0.9973548837454184	9.5397893368153e-09	-0.7735271977999565	1.0020231774730909e-05	-0.6361101672012429	1.910148939916311e-07	-0.5128384959221562	False	21304584,21290644,21293043,21296416,21297475,21301062,21301105,21301407,21304372,21304582,21304731,21304962,21305345,21305575,21306618,21307052,21307989,21309216,21309266,21310298,21311102,21311977,21312766,21313507,21314252,21314506,21314582,21316495,21316845,21317052,21317146,21318840,21319487,21320243,21320824,21321254,21323115,21323285,21327312,21327434,21328445,21328500,21329029,21333747,213…		13_21343596_ACTTTT_A;13_21333747_CAA_C;13_21333745_AAC_A;13_21320824_G_GT;13_21320243_CAT_C;13_21317146_TTTGAG_T;			13_21343596_ACTTTT_A;13_21338850_C_T;13_21338827_G_A;13_21338769_G_A;13_21338737_G_T;13_21338133_T_C;13_21338026_T_C;13_21337705_C_T;13_21337630_C_T;13_21337550_C_T;13_21336948_C_T;13_21334741_A_T;13_21333747_C_A;13_21333747_CAA_C;13_21333745_AAC_A;13_21329029_G_A;13_21328500_A_C;13_21328445_C_A;13_21327434_G_A;13_21327312_C_T;13_21323285_C_T;13_21323115_C_T;13_21321254_C_T;13_21320824_G_GT;13_21…			0.10643564356435643	13	-1	21302870	21348097
ENSG00000151065	ENSG00000151065	AHQGTGAGISPVILNSGEGK	Q8IZD4	12_2116768_C_T	rs2429127	0.001627647610993493	2.623593485683083e-06	17.0	2.8487484989493264e-09	0.5503265517198315	8.473086816849736e-05	0.3918698475449512	2.2426573752091328e-07	0.4658237976463032	1.0001197740399207e-10	0.5811115899958221	False	2116768,2095833,2100023,2108717,2111369,2117542,2117830,2118134,2118433,2120085,2124955,2127905					12_2111369_G_C;12_2108717_C_T;12_2100023_C_G;	12_2111369_G_C;12_2108717_C_T;12_2100023_C_G;		0.3564356435643564	12	-1	2055220	2113701
ENSG00000151176	ENSG00000151176	ACNPQPNGENAISAR	Q8NHP8	12_113828356_C_G	rs112788546	0.08948025612098602	0.00034829964056131373	17.0	9.309245265088464e-07	-0.7806015515067726	5.602354709611461e-06	-0.640545999625004	1.84138838604682e-08	-0.4941944313559812	1.9634697894630033e-11	-0.614622743664368	False	113828356,113807039					12_113807039_G_A;	12_113807039_G_A;		0.08168316831683169	12	1	113796371	113827203
ENSG00000151233	ENSG00000151233	LEETMTMLK	Q4G148-2	12_42525459_G_T	rs80132740	0.0269417725755848	0.00024501312860409773	5.0	7.113773985676749e-05	-1.1938923145056863	0.7878334554352795	0.042392925604004435	1.006317309553684	-0.04309788552346253	0.4820733547922582	0.08347262074487212	False	42525459					12_42525459_G_T;			0.06435643564356436	12	-1	42475647	42538681
ENSG00000151503	ENSG00000151503	GVVPVVMDCESTVQEK	P42695	11_134062764_C_T	rs12292394	0.0005658703831368549	3.686550034396433e-07	36.0	3.2124569258416406e-18	-1.6930933222900697	0.10579412204610034	-0.2622187161408429	1.0550295312032457e-28	-0.3000702867902875	0.10900712017947987	-0.09455634480028076	True	134062764,134073460,134093257	11_134062764_C_T;			11_134093257_A_C;	11_134093257_A_C;11_134073460_C_A;	11_134093257_A_C;11_134073460_C_A;11_134062764_C_T;		0.07178217821782178	11	-1	134020014	134095348
ENSG00000151552	ENSG00000151552	EGGLLTLAGAK	P09417	4_17517242_C_T	rs28382333	2.425651366351661e-07	1.9066569439240056e-10	12.0	2.2148098359677824e-17	-0.7779891266803292	1.0740144742001595e-16	-0.8390461307688781	0.0007391892128699421	-0.3135387686562819	9.62376554108482e-26	-0.9971838395765386	False	17517242,17511347,17511595,17511634,17511810,17511949,17515688,17518396,17518920,17520066,17523907,17526682,17527113,17527137,17531084,17531700	4_17511595_A_T;				4_17511949_G_T;4_17511810_C_T;4_17511634_G_A;4_17511595_A_T;4_17511347_G_A;	4_17511949_G_T;4_17511810_C_T;4_17511634_G_A;4_17511595_A_T;4_17511347_G_A;		0.2103960396039604	4	-1	17461884	17513857
ENSG00000151718	ENSG00000151718	ELQFVTPQK	Q6AWC2-4	4_184390087_C_T	rs7690161	0.06256235351113187	0.00016597859785581238	21.0	3.676276786960868e-08	0.5769211608180731	0.000597968304053298	0.4323882545333966	0.3587295354164003	0.17636105728695836	0.012030784882197727	0.15152496626187156	False	184390087,184380921,184390575								0.15841584158415842	4	1	184020446	184241930
ENSG00000151725	ENSG00000151725	ELNIVLPEFEK	Q71F23	4_185620108_G_T	rs1107907	4.12951032234005e-05	5.25903894108162e-08	14.0	6.113294487681858e-14	-0.5773578538090826	7.624319232300832e-13	-0.7194942897133636	4.114452359369688e-38	-1.2526072465310032	1.889601141153336e-41	-1.1443671280247516	True	185620108,185608861,185611454,185611592,185612627,185612953,185620341,185620401,185622046,185624388,185625523,185625657,185626542,185629339,185635311,185636217,185637418,185638853,185638876,185639169,185649866,185652147,185652871,185653826					4_185653826_G_A;4_185652871_A_T;4_185652147_G_A;4_185649866_C_A;4_185639169_G_A;4_185638876_C_T;4_185638853_G_A;4_185637418_C_T;4_185636217_T_A;4_185635311_C_T;4_185629339_G_A;4_185626542_G_A;4_185625657_A_G;4_185625523_T_C;4_185624388_T_C;4_185622046_C_T;4_185620401_G_A;4_185620341_G_A;4_185620108_G_T;	4_185653826_G_A;4_185652871_A_T;4_185652147_G_A;4_185649866_C_A;4_185639169_G_A;4_185638876_C_T;4_185638853_G_A;4_185637418_C_T;4_185636217_T_A;4_185635311_C_T;4_185629339_G_A;4_185626542_G_A;4_185625657_A_G;4_185625523_T_C;4_185624388_T_C;4_185622046_C_T;4_185620401_G_A;4_185620341_G_A;4_185620108_G_T;		0.3316831683168317	4	-1	185615772	185655287
ENSG00000152256	ENSG00000152256	HIGSINPNCNVLEVIK	Q15118-2	2_173338486_T_C	rs6714597	0.004852897020605717	1.05299987204719e-05	15.0	7.714202002966223e-10	0.6697698458040697	4.378221980762432e-11	0.6870920379914052	3.349212477044652e-07	0.549846567388003	2.2512691331787704e-07	0.52670548033311	False	173338486,173339808,173342788,173343823,173374179,173397099,173397100,173397674,173399343								0.2995049504950495	2	1	173420101	173489823
ENSG00000152642	ENSG00000152642	VCIVGSGNWGSAVAK	Q8N335	3_32362673_G_A	rs9813669	0.08420826757775914	0.0007715624441730439	7.0	1.626309065982508e-06	-1.0574506481417667	0.7993582927440439	0.024971595923242496	0.8849501632994518	-0.12151472635126825	0.8369187831546048	0.013626501600632872	False	32362673,32362998								0.4752475247524752	3	1	32147181	32210205
ENSG00000152778	ENSG00000152778	YIEEILDQISSQPYVLR	Q13325	10_91119729_T_C		0.002667144955393252	8.68799960208138e-06	9.0	4.376991137937544e-09	-0.6749395469837931	3.9098624906026035e-06	-0.5077388369276936	1.9951701522805414e-19	-0.9133187608909374	7.636765610092642e-24	-0.9429300148912924	False	91119729,91070051,91074197,91077090,91081946,91085368,91087256,91090086,91095471,91097554,91100068,91100258,91103786,91116706,91116763,91120287,91121907,91134555,91135132								0.2920792079207921	10	1	91174343	91180758
ENSG00000153113	ENSG00000153113	PIGPDDAIDALSSDFTCGSPTAAGK	P20810-7	5_96089111_G_A	rs26492	0.08859420783141753	0.0002651771275480212	22.0	1.1254698180807199e-07	0.8374521414005547	0.0007227362485183595	0.3532294189092453	0.003241408829632815	0.6141705376917868	0.1699796362402577	0.13655015558274775	False	96089111,96089658,96092990,96108138,96109935,96110968,96112954,96115721,96117300,96119579,96120054,96120455		5_96110968_AAAAG_A;5_96110967_CAAAA_C;5_96108138_GA_G;		5_96109935_T_G;	5_96112954_A_G;5_96110968_AAAAG_A;5_96110967_CAAAA_C;5_96109935_T_G;5_96108138_GA_G;5_96092990_A_G;5_96089658_G_A;5_96089111_G_A;	5_96112954_A_G;5_96110968_AAAAG_A;5_96110967_CAAAA_C;5_96109935_T_G;5_96108138_GA_G;5_96092990_A_G;5_96089658_G_A;5_96089111_G_A;		0.14603960396039606	5	1	95860971	96115299
ENSG00000153406	ENSG00000153406	LAAAHFDGK	Q9HBL8	16_4519439_G_A	rs11557236	3.695095936840231e-05	5.788221250611826e-08	11.0	7.525793006422679e-11	-1.0302783771101818	1.9686827254129017e-12	-1.1687269998830252	0.17141944806281814	-0.43826343239494703	0.6886146822793509	0.06296527546085642	False	4519439,4471629	16_4519439_G_A;			16_4519439_G_A;	16_4519439_G_A;	16_4519439_G_A;		0.07425742574257425	16	-1	4511681	4545764
ENSG00000153904	ENSG00000153904	GAEILADTFK	O94760	1_85890726_G_A	rs1523994	0.021232925002812257	5.6690156650143406e-05	16.0	3.593218726625757e-09	-0.4538325091929494	1.5841758039004772e-10	-0.4195464805196352	0.00014932585109001786	-0.29550749563840994	6.81752630274187e-05	-0.30011679597313123	False	85890726,85880976,85882905,85883320,85884101,85894027,85894932					1_85894932_T_A;1_85894027_G_A;1_85884101_T_C;1_85883320_C_G;1_85882905_A_G;1_85880976_T_C;1_85890726_G_A;			0.2475247524752475	1	-1	85784164	86043933
ENSG00000154721	ENSG00000154721	TGTLQFNTVSK	P57087	21_26774986_T_G	rs9976716	0.07723166926457793	0.0048610575605083145	1.0	4.632000274263336e-06	0.648005969107996	0.0034339882919579984	0.4572359625049822	2.0747239604692806	0.1345753479423306	0.6264238338225021	0.041982342572350534	True	26774986,26769507,26775002,26776480,26781161,26782056,26795758,26796190,26799793								0.12128712871287127	21	1	27011584	27089874
ENSG00000154760	ENSG00000154760	SIVFGIHPR	Q68D06	17_33759036_G_C	rs772288	1.965395406739193e-05	1.7292613155748203e-08	17.0	4.960689365363433e-13	0.7241501621703571	2.255040522922894e-12	0.6171487517098546	2.678148655698153e-15	0.6492394151928925	1.232491055770592e-14	0.6161235238737904	False	33759036								0.4925742574257426	17	-1	33762115	33775856
ENSG00000154767	ENSG00000154767	LDIDCVQAITGFDFHGGYSHPVTDGYIVCEEF	Q01831	3_14435115_C_T	rs75415198	0.0021085133698734147	2.6217786463820808e-06	23.0	1.7619452203006352e-06	-1.9099180204083768	0.8048716906803688	-0.0433333669543805	0.05415015319469872	-0.233639419816105	0.16437389072604486	0.2287231874128252	False	14435115								0.07178217821782178	3	-1	14186647	14220283
ENSG00000154803	ENSG00000154803	YEFVVTSGSPVAADR	Q8NFG4	17_17114061_G_A	rs9908150	0.012359778809564287	2.9671899290042303e-05	16.0	1.5458216389964381e-07	0.4144794298261569	7.786027674612647e-05	0.3404085473304459	7.083930129434787e-22	0.8817054156599993	9.084145637311978e-15	0.6426363989563004	False	17114061,17105615								0.4331683168316832	17	-1	17115526	17140502
ENSG00000154814	ENSG00000154814	LLVADQDFSFK	C9JLB7	3_16294425_A_G	rs6442592	5.846161110772093e-13	1.7488815097439552e-16	6.0	5.628387703642771e-23	-1.7612888408246363	5.750838644615044e-08	-0.6873511610602739	0.6368654369491752	-0.1113428630005351	0.4914727804163521	0.054245291752874535	False	16294425,16290167,16290731,16290767,16296927,16297548,16297930,16301791,16301959,16303284,16303489,16303653,16307114,16307234,16309812,16310379,16313320,16313872,16313995,16314948,16318588,16318915,16319108,16319554,16319729,16321641,16325157,16325901,16326510,16327192,16327909,16330557,16335770,16336026,16347427,16349420,16350055,16352193,16352409,16352460,16352637,16352959,16352990,16353540,163…	3_16327909_C_T;	3_16359338_AATG_A;3_16359277_GC_G;3_16354529_GTTTA_G;3_16352637_ACTCC_A;3_16350055_CTTA_C;3_16347427_GA_G;3_16325901_TAAAC_T;		3_16347427_GA_G;	3_16364954_C_T;3_16364846_C_T;3_16361108_C_A;3_16361063_C_G;3_16360800_A_G;3_16360674_G_A;3_16359993_G_A;3_16359825_C_T;3_16359690_T_C;3_16359528_C_T;3_16359338_AATG_A;3_16359277_GC_G;3_16359236_C_T;3_16358902_A_G;3_16357494_G_A;3_16355778_A_G;3_16355715_C_T;3_16355689_T_A;3_16355148_A_G;3_16354529_GTTTA_G;3_16354467_G_A;3_16353540_G_T;3_16352990_G_A;3_16352959_A_T;3_16352637_ACTCC_A;3_16352460_G…			0.1608910891089109	3	1	16306706	16391806
ENSG00000154920	ENSG00000154920	ALSLVIVDQEK	Q96AY2	17_48417187_C_T	rs4794135	0.09589743229517918	0.0016438084451698475	4.0	3.3583305013436808e-06	-0.7228445604533197	0.0186713806301048	-0.3052306135029149	0.0018868179210688879	-0.3528928437985997	0.0334442135460256	0.17876440975516322	False	48417187,48405448,48405889,48406604,48406896,48407190,48411466,48418552,48420862,48421054,48421567,48422059,48423314,48427005,48428623,48431032,48431197,48432324,48441064,48441392,48442117,48447125,48448447,48448925,48451983,48458924,48459275,48464443,48464975,48465636,48465806,48467989,48469538,48474501,48476564,48476815,48480990,48481324,48481723,48484270,48486179,48487923,48489087,48491769,484…					17_48451983_C_T;			0.2079207920792079	17	1	48450581	48458844
ENSG00000155100	ENSG00000155100	LVNIVTENCS	Q8N6M0	8_92055426_G_A	rs7820781	0.022550853204332044	0.00012210435652698634	8.0	5.969591730138818e-07	-1.0077279409680029	0.13339470196354725	-0.22589692275915865	0.6933221502594173	-0.13162821854307735	0.1605826157385707	-0.1639986762627961	False	92055426,92054293,92055814,92056288,92062304,92062381,92063199,92063552								0.07920792079207921	8	1	92082424	92099323
ENSG00000155363	ENSG00000155363	LDLQQGQNLLQGLSK	Q9HCE1	1_113089696_T_C	rs7516421	0.09977006582064407	0.00015804551164965263	44.0	2.467232568859051e-06	0.5506071470026264	9.096045864429875e-05	0.4340207541502383	0.0239389153301351	0.3029502809850973	0.00020480341457299267	0.3223565945024447	True	113089696,113064468,113067792,113071834,113072293,113072477,113072914,113074602,113075817,113076625,113080084,113084146,113086449,113086706,113086717,113087076,113090109,113090429,113090655,113094022,113094239,113095661,113095948,113096746,113098534,113100548,113100573,113101168,113101799,113102143,113104887,113106444,113107543,113107826,113110261,113110548,113113721,113114111,113114974,113117900…		1_113218641_TGGG_T;1_113218638_GGGT_G;1_113218638_GGGT_G;			1_113228623_G_A;1_113224914_T_C;1_113219388_A_T;1_113218641_TGGG_T;1_113218638_GGGT_G;1_113218638_GGGT_G;			0.2797029702970297	1	1	113215763	113243368
ENSG00000155393	ENSG00000155393	GNYSTDQLCVLDNVK	Q7Z4Q2	16_50099747_A_G	rs8052492	4.020288458973533e-09	1.071470484676445e-12	22.0	2.8038276634097683e-18	0.9245117995992717	7.747210333624805e-25	1.1215903820238124	0.00011804845557485615	0.34910783286531843	0.012855863386991313	0.2325771974797714	False	50099747,50034680,50041983,50042362,50043558,50047296,50052216,50056554,50058219,50062572,50068422,50068445,50069312,50075276,50075548,50075993,50079250,50079253,50079390,50088342,50088999,50092291,50093238,50094204,50097444,50098887,50099777,50100253,50101015,50101526,50106594,50107635,50108102,50108251,50108615,50108892,50109100,50109478,50109928,50110084,50110650,50111074,50112267,50113773,501…		16_50126657_G_GTCAT;16_50123310_TGA_T;16_50123309_CTG_C;16_50120866_ACT_A;16_50110650_AC_A;16_50101526_TAACTC_T;	16_50120122_C_T;16_50109478_G_A;		16_50138100_A_C;16_50130045_G_A;16_50128872_T_C;16_50127120_G_C;16_50126691_A_C;16_50126657_G_GTCAT;16_50125856_A_G;16_50125145_A_T;16_50123310_TGA_T;16_50123310_T_A;16_50123309_CTG_C;16_50122946_T_C;16_50121773_C_G;16_50120983_G_C;16_50120869_A_T;16_50120867_C_A;16_50120866_ACT_A;16_50120668_G_C;16_50120122_C_T;16_50119170_T_C;16_50118245_G_A;16_50117316_G_A;16_50116999_C_T;16_50116819_G_A;16_50…		16_50106594_T_C;	0.2425742574257425	16	1	50099852	50140298
ENSG00000155542	ENSG00000155542	YEPIFFQSIGNPFIFR	Q8NE22	5_56247528_G_T	rs77112307	4.037557105711089e-08	4.670302583288324e-11	6.0	1.2509053600056588e-14	-1.2727818443828292	9.939137139294242e-12	-0.9591388977170308	1.2397930354801105e-31	-1.2750254085001256	2.0664283869593729e-38	-1.4161490434922577	False	56247528,56194900,56224124,56247379,56254485,56271822								0.15594059405940594	5	1	56205087	56221359
ENSG00000155792	ENSG00000155792	ELIDWLIEHK	Q8TB45	8_120864840_A_C	rs62526622	0.0583013487832716	0.0010627305011349816	3.0	2.2300208035609564e-07	-0.8265057342427974	0.2129634042396661	-0.18265210952101613	4.6506910179398546e-11	-0.6419771985908621	6.301528192864715e-12	-0.64299632269011	False	120864840,120864836,120865935,120867693,120868138,120868328,120868861,120869185,120869218,120870051,120870188,120870594,120870605,120870795,120871117,120871702,120871844,120872479,120872591,120873147,120873211,120873317,120873701,120873842,120873916,120874360,120874421,120874529,120874909,120874963,120875017,120875087,120875221,120875326,120875562,120875666								0.16831683168316833	8	1	120885957	121063152
ENSG00000155906	ENSG00000155906	LNSELDLDDAILEK	Q9NWS8	6_151753470_G_C	rs183013087	0.0006541551881764523	1.4445538655652833e-06	11.0	2.25761606615845e-09	-0.5463092300557986	1.6640651508909308e-05	-0.3125690481024388	1.2791079030911044e-25	-0.7246582176852162	1.222353818352892e-18	-0.7343402089224965	False	151753470,151732017,151732385,151736084,151738131,151739642,151739810,151743629,151744283,151751908,151753395,151753421,151754273,151754744,151755806,151756070,151756612,151757327,151758029,151759035,151767907,151773504,151774916,151775259,151781363,151781404,151782816,151786177,151789355,151795994,151799355,151800761		6_151758029_A_AATG;			6_151767907_A_G;6_151759035_G_C;6_151758029_A_G;6_151758029_A_AATG;6_151757327_T_C;6_151756612_A_G;6_151756070_A_G;6_151755806_G_A;6_151754744_G_A;6_151754273_T_C;6_151753421_C_G;6_151753395_A_G;6_151751908_C_G;6_151744283_G_A;6_151743629_A_C;6_151739810_G_T;6_151739642_G_A;6_151738131_A_G;6_151736084_G_T;6_151732385_T_C;6_151732017_C_T;6_151753470_G_C;			0.3836633663366337	6	-1	151725989	151773259
ENSG00000156049	ENSG00000156049	IATPSFVPTQQDVLR	O95837	9_80149918_G_A	rs7870028	0.0064158565358135924	2.811783482400058e-05	8.0	6.048394899576441e-09	-0.47107831406162104	8.513998767420592e-05	-0.3281009236856971	3.5381452733952757e-15	-0.5225075341864306	2.582455955730065e-15	-0.5075319363894492	True	80149918,80141988,80143110,80144714,80164318					9_80164318_C_T;9_80144714_G_A;9_80143110_G_A;9_80141988_C_A;9_80149918_G_A;			0.4777227722772277	9	-1	80037995	80263223
ENSG00000156398	ENSG00000156398	YGELEPYVYFNK	Q96NB2	10_104487973_T_C		3.3551162526551202e-06	5.118790501537966e-09	8.0	5.485925165401212e-16	-0.9816576924970372	6.334995887126111e-18	-1.0107955549610244	8.128165087015348e-14	-0.8708012251343105	3.385654595082314e-20	-0.9740773284404772	False	104487973,104500988,104503174,104523018,104526189,104527430,104531606,104534448,104536771				10_104503174_T_C;10_104500988_T_G;	10_104487973_T_C;	10_104487973_T_C;		0.1831683168316832	10	1	104474295	104503249
ENSG00000156475	ENSG00000156475	DEISVDSLDFSK	Q00005	5_146647500_A_C	rs17106354	0.07366129750870541	0.004469713934285993	1.0	5.929246781962637e-06	-1.8410938705888469	0.2498362206648809	0.3122785100822088	3.2113436252757155	-0.14314155397083642	0.013141582257472249	0.4072360987986637	False	146647500,146634721,146640186,146646690,146652392,146659014,146662190,146663884,146667352,146675463								0.11386138613861388	5	-1	145967936	146464347
ENSG00000157184	ENSG00000157184	LNFELTDALK	P23786	1_53690512_T_C		0.003262377022544692	3.65797307515016e-06	27.0	1.686701423396345e-08	-0.3639059039067261	1.8164945683870792e-09	-0.5107075143190982	0.09345325607713603	-0.1189176427865412	0.00949511594409915	-0.16057057781543574	False	53690512								0.3589108910891089	1	1	53662101	53679869
ENSG00000157326	ENSG00000157326	AVVPEMEK	Q9BTZ2	14_24423090_A_G	rs2273944	4.020288458973533e-09	4.5268039825773794e-12	5.0	3.3970229451323555e-15	-1.2778935119077508	1.7220863835188058e-16	-1.3177778075955535	4.244370134856162e-13	-0.9747799099586054	5.398187363219186e-15	-0.9527138341808068	False	24423090,24403219,24405786,24406918,24407654,24408954,24417017,24420204							14_24423090_A_G;	0.11386138613861388	14	1	24422795	24438488
ENSG00000157379	ENSG00000157379	EEVLQDPVLK	Q96LJ7	14_24776018_C_T	rs74476682	6.164252363785323e-06	7.818723831054736e-09	10.0	6.39436150451109e-16	-1.9100876321632616	4.2618774632051105e-15	-1.6156568517054954	3.4635379996802706e-18	-1.7074606087143775	2.0285182104320503e-19	-1.7153747388516296	False	24776018,24747931,24749521,24758641,24760764,24787588	14_24760764_G_A;		14_24760764_G_A;	14_24760764_G_A;		14_24760764_G_A;		0.06435643564356436	14	-1	24759804	24769039
ENSG00000158092	ENSG00000158092	FAGNPWYYGK	P16333	3_136557126_A_T		0.03182204625977627	7.876198446995002e-05	19.0	8.583275688325845e-09	-0.6646362999728876	0.4017728284285401	-0.07991745124211658	0.25034417543974585	-0.28796810117190064	0.9866596486678221	0.0015872775876198727	False	136557126								0.13613861386138615	3	1	136581050	136668665
ENSG00000158764	ENSG00000158764	WSSQQGNK	Q8WWU7-2	1_160920441_A_G	rs79889663	3.735944953779603e-08	1.2740748017556386e-10	2.0	1.0773279643176107e-11	1.3026261005672188	7.23543003626682e-05	0.6948409449219977	0.1557253725366112	0.08562305776687434	0.04832734849946069	-0.21752227114134576	False	160920441	1_160920441_A_G;							0.099009900990099	1	-1	160914815	160924589
ENSG00000158793	ENSG00000158793	LLEEYTQLAR	Q86X76-2	1_161254847_G_A	rs56063771	0.08553967013704042	0.000369167257342259	15.0	5.697196437846407e-07	-0.9651679092348152	0.0006730872718446594	-0.43776440035341935	4.395421145004899e-09	-0.2315220758900165	0.8121960343422479	0.02637535309039137	False	161254847								0.05198019801980198	1	1	161087876	161095235
ENSG00000158825	ENSG00000158825	SAYCPYSHFPVGAALLTQEGR	P32320	1_20915701_A_C	rs2072671	6.581426562790292e-08	1.6253651388491297e-10	3.0	4.4205696499074467e-16	-0.9258203339581056	6.389158645193952e-08	-0.5194147845922288	2.72928797260259e-12	0.598713995657131	3.1037494978691913e-12	0.6677697328985986	False	20915701,20888348,20889380,20894450,20894618,20895721,20913519,20915172,20915531,20916080,20916238,20916444,20917108,20917206	1_20915701_A_C;			1_20915531_A_G;	1_20917206_G_A;1_20917108_G_A;1_20916444_G_A;1_20916238_G_A;1_20916080_C_G;			0.2995049504950495	1	1	20915441	20945401
ENSG00000159140	ENSG00000159140	TVLDTYPGVSEADAGETLSSTGPFALEPDATG	P18583-6	21_34945721_T_C	rs3174808	6.349966936008172e-20	2.5327936404643507e-25	60.0	4.2421795009295355e-34	1.2378049308962096	0.4774678681129836	0.08644720335640743	0.10156031878600537	0.09265464031340197	0.6702453939933627	0.014832248392454032	False	34945721,34871281,34875908,34877070,34879970,34894797,34902527,34910220,34916613,34926260,34943543,34959204,34962745,34964709,34969152,34969919,34971053,34971155,34978857,34979082,35002285,35009161,35019377	21_34926260_C_T;			21_34945721_T_C;	21_34943543_G_T;21_34926260_C_T;21_34916613_T_C;	21_34943543_G_T;21_34926260_C_T;21_34916613_T_C;21_34945721_T_C;	21_34945721_T_C;	0.33910891089108913	21	1	34914924	34949812
ENSG00000159176	ENSG00000159176	GYGYGQGAGTLSTDK	P21291	1_201600843_T_G	rs572592	1.520467077201636e-07	1.4150837674885258e-10	9.0	0.0004342228203974768	-0.30366020272587896	0.006223875837798845	-0.2860963648851679	0.11295273948791155	-0.31729320998643123	0.7433480513382538	-0.0268116293471528	False	201600843,201597947,201606116,201607272								0.1782178217821782	1	-1	201452658	201478584
ENSG00000159445	ENSG00000159445	FFVSCNVQSVDEK	Q5T1C6	1_151838092_C_T	rs7541453	0.014129171061158846	0.00018710401628593745	3.0	8.982680492377498e-08	0.8112660088971952	7.483505344577971e-06	0.5587740503455187	1.7120447708544796e-26	0.8198481783791961	0.3522226231091949	-0.07192899838541737	False	151838092,151841770,151845650,151846517,151848126,151858888,151859050,151862661,151865780,151868892,151878223,151881093,151882826,151882856,151892199,151894379,151894870,151894887,151896233,151897229,151897377,151897616,151898037,151898749,151898947,151902101,151903634,151903823,151904146,151907073,151907839,151910254,151911780,151917393,151917652,151922808,151927901,151931300	1_151862661_G_A;			1_151846517_C_T;	1_151881093_G_A;1_151878223_G_T;1_151868892_C_T;1_151865780_G_A;1_151862661_G_A;1_151859050_G_A;1_151858888_A_G;1_151848126_A_T;	1_151881093_G_A;1_151878223_G_T;1_151868892_C_T;1_151865780_G_A;1_151862661_G_A;1_151859050_G_A;1_151858888_A_G;1_151848126_A_T;		0.4430693069306931	1	-1	151846060	151882284
ENSG00000159461	ENSG00000159461	VPLDLSPR	Q9UKV5	16_56477277_G_A	rs117349585	0.08859420783141753	0.0005841259843856774	10.0	6.469255791136108e-08	-1.0517692901476303	0.4537917191011978	-0.1077941850370654	0.02308405766631021	-0.4010545984113862	0.5373885828104654	0.054963806880916885	True	56477277								0.12623762376237624	16	-1	56395364	56459450
ENSG00000159840	ENSG00000159840	SPSSSQPLPQVPAPAQSQTQFHVQPQPQPK	Q15942	7_143080060_A_T	rs11978404	1.1726206721273638e-16	6.6465465756071336e-21	19.0	1.6800087059071594e-24	-1.8540438762186664	0.0019322859748332555	-0.5087674421763557	0.0982033955444439	-0.5547401705038357	0.8948242422522433	-0.016435427002669995	False	143080060	7_143080060_A_T;					7_143080060_A_T;		0.05198019801980198	7	1	143078173	143088204
ENSG00000160058	ENSG00000160058	GLSDFLGVISDTFAPSPDK	Q9NW68	1_32896119_G_C	rs12140148	0.06731819591275473	0.00027675731409113844	14.0	5.756873264033183e-07	-0.5954248841555412	0.009374433971159559	-0.27849999944119475	0.9062571511664076	-0.28362302862234745	0.2200773845932392	-0.1240852835021869	False	32896119,32875382,32875767,32876267,32889223,32890941,32899530,32899689,32900261,32900337,32900343,32900559,32900834,32901167,32901237,32901238,32901982,32903549,32903765,32904152,32904611,32904656,32905000,32905081,32905807,32906482,32906500,32906649,32906758,32907017,32907815,32908053,32908453,32908457,32908731,32909583,32909823,32909980,32910819,32911587,32911906,32912628,32913807,32913854,329…								0.14603960396039606	1	-1	32830704	32860332
ENSG00000160190	ENSG00000160190	NKPLDPEMQCLLLSDGK	P57057	21_44208433_G_A	rs4607027	0.06813775917021586	0.003943023805189357	1.0	0.00014179234142469745	1.0024487289563662	0.05690850082562731	0.4431633011397835	0.4632920642647471	0.05837761497031211	0.41433346971169627	-0.058694214355113274	False	44208433,44207846,44208024								0.2425742574257425	21	1	43916118	44001550
ENSG00000160193	ENSG00000160193	ATFDNVTSYLK	P57081	21_44224642_G_A	rs149018923	0.09077561162689522	0.0006710441022769168	9.0	7.135389832281162e-07	-0.6113890947129494	0.013208194103542242	-0.3380702962855415	1.5937889574481287e-30	-1.7478556724375287	3.801987187655372e-12	-0.7544801769126942	False	44224642,44226331,44226682,44229685,44229698,44229777,44229857,44229927,44230041,44230220,44230446,44230997,44231232,44231374,44231618,44232038,44232131,44232231,44233055,44233594,44234695,44234698,44234768,44234973,44235367,44235561,44236632,44236697,44236767,44236993,44237351,44238232,44238237,44238270,44238313,44238352,44238404,44238424,44238499,44238649,44238657,44239295,44239310,44239760,442…		21_44268595_TCA_T;21_44267929_CCTGT_C;21_44263682_GGC_G;		21_44269860_A_C;21_44263321_G_A;	21_44299148_C_T;21_44298404_G_A;21_44295629_C_T;21_44288594_C_T;21_44287486_G_C;21_44283785_G_A;21_44282099_G_T;21_44280729_G_A;21_44278878_G_A;21_44277236_G_A;21_44276469_C_T;21_44272963_C_T;21_44271947_C_A;21_44270931_G_A;21_44269860_A_C;21_44269117_C_T;21_44268595_TCA_T;21_44268584_G_A;21_44268431_G_A;21_44268289_T_C;21_44267929_CCTGT_C;21_44266421_A_T;21_44263682_GGC_G;		21_44283574_C_T;	0.07673267326732673	21	-1	44263204	44299678
ENSG00000160194	ENSG00000160194	TLVEFPQK	P56181-2	21_44358336_G_A	rs74480665	1.9820536241325483e-06	1.7514303800289452e-09	13.0	4.794141707813183e-13	-1.4230921415277444	4.3621059792780254e-12	-1.3247273547799796	4.1285194382623605e-16	-1.4600061208449548	5.0475781321135315e-22	-1.4761109351635675	True	44358336,44228727,44249101,44257918,44264468,44267360,44268503,44272855,44274007,44276083,44276489,44277414,44280295,44293356,44295750,44298917,44312171,44315596,44318204,44319921,44324506,44327013,44330646,44330649,44333185,44335332,44335932,44336888,44337678,44339296,44341498,44342473,44343636,44344958,44345527,44345836,44347489,44347892,44348810,44349489,44350150,44350321,44350895,44351032,443…				21_44333185_T_A;21_44330649_A_G;21_44330646_A_G;	21_44327013_A_G;21_44324506_T_C;21_44319921_C_T;21_44318204_T_A;21_44315596_A_C;			0.061881188118811874	21	1	44299754	44333414
ENSG00000160200	ENSG00000160200	VQPSDQVGK	P0DN79	21_44488033_T_C	rs234714	0.00015824253774410275	1.437363549515657e-07	22.0	2.6077587908922593e-09	0.5430912754935369	9.795992256826859e-13	0.7419230878634121	3.3259121347131565e-19	0.7433674300839497	8.62112462365788e-11	0.5977486815089684	False	44488033,44488755		21_44488755_GAA_GAAA;			21_44488755_GAA_GAAA;21_44488033_T_C;			0.20544554455445546	21	-1	44473301	44497053
ENSG00000160208	ENSG00000160208	ETGGFSQEELLK	Q14684	21_45315475_A_T	rs8132421	0.058252856877781575	9.933028724523004e-05	32.0	0.0006124012475928893	-0.2929213390972281	0.0011222284381414782	-0.28251466694296345	0.9950972319804259	-0.035705291797266614	0.6768344842082951	-0.02710287052945888	False	45315475								0.2004950495049505	21	1	45079429	45115958
ENSG00000160213	ENSG00000160213	VHVGDEDFVHLR	P04080	21_45234744_T_G	rs11089098	2.0119574901703656e-06	4.67057261090165e-09	5.0	2.284764978336211e-12	-0.5473893373228815	1.6588843096953327e-07	-0.4094782335704919	1.15270186843465e-21	-0.7670083898346038	1.7852376356950808e-20	-0.606134199072865	False	45234744,45214581,45234806								0.3589108910891089	21	-1	45192393	45196326
ENSG00000160293	ENSG00000160293	FTSPADLDASGAGPGPK	P52735-3	9_136817035_T_C	rs653373	1.5757349417583615e-06	6.127962858339926e-10	28.0	1.5910799874486873e-13	-0.6999169212942441	9.432787122722063e-10	-0.5872496514792385	3.462306197680147e-19	-0.6341613499403683	7.905770923272823e-27	-0.6085338356109963	False	136817035,136817098,136817351,136817382,136817448,136817634,136817728,136817859,136819589,136820594,136821085,136822180,136822210,136822289,136822302,136822507,136822827,136822963,136825399		9_136822963_GA_G;			9_136825399_G_C;9_136822963_GA_G;9_136822827_T_C;9_136822507_G_A;9_136822302_C_T;9_136822289_G_A;9_136822210_C_T;9_136822180_C_G;9_136821085_G_A;9_136820594_G_C;9_136819589_G_A;9_136817859_A_G;9_136817728_G_A;9_136817634_A_G;9_136817448_G_C;9_136817382_C_G;9_136817351_G_A;9_136817098_A_C;9_136817035_T_C;			0.4282178217821782	9	-1	136627016	136857726
ENSG00000160439	ENSG00000160439	LVGLEAPSVR	Q8NBN7	19_55574403_C_G	rs1654455	0.001445160719762842	3.5057256356360346e-06	11.0	8.383763069466237e-09	-0.8768209316568143	4.9400126726186084e-09	-0.8863098441472568	0.00538780433975386	-0.5383842542709297	1.769891974156688e-05	-0.5426820093762122	False	55574403				19_55574403_C_G;	19_55574403_C_G;	19_55574403_C_G;		0.10643564356435643	19	-1	55550476	55582659
ENSG00000160710	ENSG00000160710	RNAEFLTCNIPTSNASNNMVTTEK	P55265-2	1_154549470_T_C	rs12130403	2.0866701128412398e-05	5.479760188513157e-09	59.0	3.410032073382329e-15	0.8567042828329602	1.099954031216571	-0.022035213680210664	2.0253378920831224	0.11452793102966682	0.8709562965662832	0.0058906681368288	True	154549470,154550943,154553450,154554022,154554205,154554219,154554357,154555492,154556040,154556266,154556761,154559598,154561925,154563735,154564141,154565582,154568665,154568834,154573967,154575321,154575613,154577008,154577515,154577876,154578391,154579634,154586012,154587669,154587994,154589648,154595378,154595545,154598437,154598688,154600998,154602588,154603336,154605873,154608823	1_154573967_T_C;	1_154598688_TTG_T;1_154595545_ACT_A;1_154595378_T_TAC;1_154568834_T_TCA;1_154563735_AG_A;1_154556761_CCT_C;1_154556760_ACC_A;		1_154556761_CCT_C;1_154556760_ACC_A;1_154556266_G_A;1_154556040_T_G;1_154555492_T_C;	1_154598688_TTG_T;1_154598437_A_G;1_154595545_ACT_A;1_154595378_T_TAC;1_154589648_C_A;1_154587994_T_C;1_154587669_A_G;1_154586012_C_T;1_154579634_C_G;1_154578391_T_C;1_154577515_C_T;1_154577008_T_G;1_154575613_T_C;1_154575321_G_A;1_154568834_T_TCA;1_154568665_A_G;1_154565582_G_C;1_154564141_T_C;1_154563735_AG_A;1_154559598_T_C;		1_154561925_C_A;	0.3242574257425743	1	-1	154554538	154600475
ENSG00000160752	ENSG00000160752	IGTDIQDNK	P14324-2	1_155279482_T_G	rs2297480	0.0007243190329846843	1.487871652455476e-06	12.0	1.4635133219308013e-08	-0.4716451901721603	2.9580919781346968e-09	-0.5935209420560712	3.935560259223544e-35	-0.5601548650825618	0.00026286234502159397	-0.2325200848672349	False	155279482,155227802,155228046,155229222,155229766,155229915,155230131,155230705,155231545,155232074,155234821,155235493,155239624,155240371,155241103,155241361,155244092,155245318,155247707,155248113,155248575,155249698,155250691,155252833,155253308,155253583,155255837,155255906,155256082,155256231,155257492,155258756,155259323,155260096,155260383,155262613,155265177,155266335,155268120,155268425…					1_155289545_T_G;1_155286258_C_T;1_155285854_T_C;1_155284586_T_A;1_155284261_C_T;1_155282829_A_G;1_155280164_T_C;1_155279482_T_G;			0.2524752475247525	1	1	155278539	155290457
ENSG00000160783	ENSG00000160783	LLDTMVDTFLQK	Q6P1K2	1_156202809_G_C	rs2251636	0.060666151011255325	0.00047600409091037794	7.0	6.225362289581362e-08	-0.4559399928488763	0.00021894975091600241	-0.3425161228284417	3.811308778760249e-27	-0.380612503030225	0.8131801343387458	0.011239658272480049	True	156202809,156156789,156156951,156158367,156159217,156160358,156160696,156160892,156162559,156165317,156165342,156168736,156169610,156171296,156172125,156173685,156174475,156181007,156181770,156182710,156184458,156184747,156187037,156188214,156189793,156190083,156192591,156197380,156197614,156198994,156199367,156200445,156200671,156202173,156202491,156202640,156202759,156202860,156202868,156204047…	1_156202173_A_G;	1_156202491_CT_C;1_156199367_GT_G;1_156192591_A_ACCACCG;1_156187037_GA_G;1_156187035_AAG_A;1_156182587_AGCTTTGGCTTGCGCGTATTTTTCCGGTCGCGGACATCCCACCGCGCAGAGCCTCGCCTCCCCGCTGCCCTCAGCCTCCGATGACTTCCCCGCCCCCGCCCTGCTCGGTGACAGACGTTCTACTGCTTCCAATCGGAGGCACCCTTCGCGGGAGCGGCCAATCGGGAGCTCCGGCAGGCGGGGAGGCCGGGCCAGTTAGATTTGGAGGTTCAACTTCAACATGGCCGAAGCAAGTAGCGCCAATCTAGGCAGCGGCTGTGAGGAAAAAAGGCATGAGGGGTCGTCTTCGGAATCTG…	1_156182587_AGCTTTGGCTTGCGCGTATTTTTCCGGTCGCGGACATCCCACCGCGCAGAGCCTCGCCTCCCCGCTGCCCTCAGCCTCCGATGACTTCCCCGCCCCCGCCCTGCTCGGTGACAGACGTTCTACTGCTTCCAATCGGAGGCACCCTTCGCGGGAGCGGCCAATCGGGAGCTCCGGCAGGCGGGGAGGCCGGGCCAGTTAGATTTGGAGGTTCAACTTCAACATGGCCGAAGCAAGTAGCGCCAATCTAGGCAGCGGCTGTGAGGAAAAAAGGCATGAGGGGTCGTCTTCGGAATCTGTGCCACCCGGCACTACCATTTCGAGGGTGAAGCTCCTCGACACCATGGTGGACACTTTTCTTCAGAAGCTGGTCGCCGCCGGCAGGTAAAG…	1_156202173_A_G;1_156182587_AGCTTTGGCTTGCGCGTATTTTTCCGGTCGCGGACATCCCACCGCGCAGAGCCTCGCCTCCCCGCTGCCCTCAGCCTCCGATGACTTCCCCGCCCCCGCCCTGCTCGGTGACAGACGTTCTACTGCTTCCAATCGGAGGCACCCTTCGCGGGAGCGGCCAATCGGGAGCTCCGGCAGGCGGGGAGGCCGGGCCAGTTAGATTTGGAGGTTCAACTTCAACATGGCCGAAGCAAGTAGCGCCAATCTAGGCAGCGGCTGTGAGGAAAAAAGGCATGAGGGGTCGTCTTCGGAATCTGTGCCACCCGGCACTACCATTTCGAGGGTGAAGCTCCTCGACACCATGGTGGACACTTTTCTTCAGAAGCTGGTCG…	1_156205383_A_C;1_156205301_T_C;1_156204653_C_T;1_156204047_G_A;1_156202868_G_A;1_156202860_A_T;1_156202759_G_A;1_156202640_C_T;1_156202491_CT_C;1_156202173_A_G;1_156200671_T_C;1_156200445_G_C;1_156199367_GT_G;1_156198994_T_C;1_156197614_T_G;1_156197380_C_T;1_156192591_A_ACCACCG;1_156190083_A_G;1_156189793_T_C;1_156188214_A_G;1_156187037_G_A;1_156187037_GA_G;1_156187035_AAG_A;1_156182587_AGCTTTGG…	1_156205383_A_C;1_156205301_T_C;1_156204653_C_T;1_156204047_G_A;1_156202868_G_A;1_156202860_A_T;1_156202759_G_A;1_156202640_C_T;1_156202491_CT_C;1_156202173_A_G;1_156200671_T_C;1_156200445_G_C;1_156199367_GT_G;1_156198994_T_C;1_156197614_T_G;1_156197380_C_T;1_156192591_A_ACCACCG;1_156190083_A_G;1_156189793_T_C;1_156188214_A_G;1_156187037_G_A;1_156187037_GA_G;1_156187035_AAG_A;1_156182587_AGCTTTGG…		0.35148514851485146	1	1	156182784	156212874
ENSG00000160796	ENSG00000160796	CQEQLLALLQALGR	Q6ZNJ1-3	3_46963035_C_A	rs6442040	0.0026092616504470225	2.6162274907206696e-06	29.0	1.7958128716805088e-08	1.3514822588312083	0.0706927611663922	-0.1901488497669476	0.004589172090018018	0.17966439076355015	2.0336329557355004e-05	-0.27367000344731524	False	46963035,46953813,46955970,46957298,46960742,46963502,46965197,46965856,46966083,46966387,46967722,46968227,46969970,46972377,46973673,46973820,46974100,46974172,46979013								0.31683168316831684	3	1	47021173	47051193
ENSG00000161298	ENSG00000161298	KSYLIEHQR	Q96SR6-2	19_37368887_T_A	rs4806370	0.0747850106586768	0.0015421742455640345	3.0	1.1843282285879445e-05	-0.8639402577653494	0.3708264056356304	-0.27701333246551496	2.1740671626169483	-0.15537969942110447	0.7196410560678972	-0.052084106679266884	False	37368887								0.07178217821782178	19	1	37095719	37119499
ENSG00000161513	ENSG00000161513	EAYHAVVLSYGAEDHR	P22570-7	17_72865239_C_T	rs690418	0.00034778533225804603	3.0962341414381506e-07	25.0	1.1989718684541878e-12	-0.9850858860158838	9.639936818666077e-09	-0.6386675620156156	2.7895989003857785e-14	-0.7824176234851602	5.0683665360427204e-11	-0.5760825709335547	False	72865239,72861427,72861974,72861991,72862155,72862593,72862809,72863030,72863278,72863477,72863506,72863984,72864084,72864407,72864768,72865762,72866679,72866710,72867087,72869833,72871095,72874252,72876155	17_72863030_T_C;17_72862593_C_T;			17_72864768_A_G;17_72862593_C_T;	17_72867087_A_G;17_72866710_C_A;17_72866679_G_A;17_72865762_A_G;17_72864768_A_G;17_72864407_C_T;17_72864084_A_G;17_72863984_C_T;17_72863506_A_G;17_72863477_G_A;17_72863278_A_G;17_72863030_T_C;17_72862809_T_C;17_72862593_C_T;17_72862155_T_G;17_72861991_C_T;17_72861974_G_A;17_72861427_C_T;17_72865239_C_T;	17_72867087_A_G;17_72866710_C_A;17_72866679_G_A;17_72865762_A_G;17_72864768_A_G;17_72864407_C_T;17_72864084_A_G;17_72863984_C_T;17_72863506_A_G;17_72863477_G_A;17_72863278_A_G;17_72863030_T_C;17_72862809_T_C;17_72862593_C_T;17_72865239_C_T;		0.2400990099009901	17	-1	72858619	72869156
ENSG00000161618	ENSG00000161618	GLDGAVDMGAR	Q8IZ83	19_49945850_C_T	rs1578944	2.0866701128412398e-05	1.47544853345242e-08	22.0	1.4108914488453772e-11	-0.8150178955562792	2.2699549684986595e-13	-0.7553725175059142	2.986100497076997e-27	-1.1278953642432	9.1444305898458e-28	-1.1928138300593325	False	49945850,49946493,49946871,49947002,49947383,49947453,49947995,49948360,49948522,49948612,49949079,49949096,49949135,49949183,49949400,49949404,49950298,49950356,49951632,49953191,49953194,49954356,49954803,49954807,49955016,49955222,49955615,49955970,49956274,49957010,49957500,49958411,49958546,49958575,49958650,49960479,49961475,49964325,49964381,49964977,49965653,49966081,49966116,49966121,499…	19_49964977_C_G;	19_49961475_CA_C;			19_49969310_A_G;19_49968290_T_C;19_49966121_A_G;19_49966116_C_T;19_49966081_A_G;19_49965653_A_G;19_49964381_A_G;19_49964325_A_G;19_49961475_CA_C;19_49960479_T_G;19_49958650_G_A;19_49958575_G_A;19_49958546_A_G;19_49958411_A_T;19_49957500_G_C;19_49957010_C_T;	19_49969310_A_G;19_49968290_T_C;		0.24504950495049505	19	1	49956426	49974305
ENSG00000161654	ENSG00000161654	SQAQQPQK	Q3MHD2	17_42066678_C_T	rs8073650	0.0005568344270966819	1.846627786060553e-06	7.0	0.0004172374258309605	1.086270640654636	0.3940710874312102	0.10096040518693307	1.0034996411117236	0.0620834767630467	0.3717791720246302	0.03251121769815198	False	42066678								0.09405940594059406	17	-1	42112003	42144987
ENSG00000162174	ENSG00000162174	LTLFHIEQGK	Q7L266	11_62166325_C_T	rs10792352	0.0007228099845065915	1.773077023140496e-06	10.0	1.4858090022805208e-09	0.6445832306448662	1.0206824815480023e-07	0.4652318949457746	1.414522496173104e-08	0.6157956400633899	1.9672624384641095e-07	0.4977230582727112	False	62166325,62120815					11_62120815_C_T;	11_62120815_C_T;		0.31683168316831684	11	1	62104920	62160882
ENSG00000162377	ENSG00000162377	FNCEENQHSDSCYK	Q96BR5	1_53124696_G_T	rs6660558	0.010198274331862545	3.472385551440791e-05	11.0	4.786413667646238e-09	-0.5202889559135677	1.597502248882325e-08	-0.5230316054966342	1.9782803731511013e-08	-0.25941701374840725	2.9921356786774264e-08	-0.29773850565271553	False	53124696,53123264,53123716,53125600,53125983								0.4084158415841584	1	-1	53152508	53164038
ENSG00000162430	ENSG00000162430	FQPLLPETMTK	H9KV50	1_26392824_C_A	rs35123100	0.0014102213164408025	4.144458861353022e-06	9.0	6.905007883861328e-06	-0.8611031704786382	0.003420331534156089	-0.4819483439395942	0.0007373016012256506	-0.2840658629879136	0.0002890003393407933	-0.3209613134883933	False	26392824,26379016								0.06683168316831684	1	1	26126667	26144713
ENSG00000162551	ENSG00000162551	GNSIFGLAPMLSDTDK	P05186	1_21904574_A_G	rs2242421	0.005430147415565796	8.255321837641015e-06	22.0	7.067395051434343e-09	-0.9631716512751238	4.098313928139204e-07	-0.8531883985110635	3.9720456655341617e-08	-0.7715120888307689	3.3579730578580134e-09	-0.7216538464670297	False	21904574,21894785,21897903,21899396,21903180		1_21899396_A_AGC;		1_21904574_A_G;	1_21903180_C_T;1_21899396_A_AGC;1_21897903_T_C;1_21894785_G_T;			0.08663366336633663	1	1	21835858	21904905
ENSG00000162623	ENSG00000162623	DDVIVALK	Q6IPR3	1_75189847_T_C	rs1424671	5.166204739924625e-05	1.3511843368407452e-07	7.0	9.282939279514145e-12	-0.6957673715234818	7.985192620635362e-10	-0.646147510492578	2.7119116086103696e-22	-0.9753654460512916	7.582524150633245e-24	-1.0245485335215518	False	75189847,75192338,75197283,75197614,75199973,75205344,75207320,75209312,75209522,75211738,75213088,75213566,75213619,75214390,75216449,75218612,75219066,75219125,75220929		1_75218612_GC_G;1_75213566_CAT_C;			1_75220929_A_G;1_75219125_T_C;1_75219066_C_G;1_75218612_GC_G;1_75216449_C_T;1_75214390_G_C;1_75213619_G_T;1_75213566_CAT_C;1_75213088_G_A;1_75211738_T_C;1_75209522_G_A;1_75209312_A_G;1_75207320_G_A;1_75205344_A_C;1_75199973_T_C;			0.4876237623762376	1	1	75198836	75232362
ENSG00000162836	ENSG00000162836	EGPIIIHTDEADSEVLYPNYQSCWSLR	X5D289	1_147114285_A_T	rs11811290	0.0031166533065779605	1.879613816579265e-05	5.0	1.3610775002969393e-08	-0.7626490450626071	0.00013669979939248862	-0.4081872859141251	7.72878775535991e-18	-0.8207178322642891	2.2700591867089928e-17	-0.8615280897949911	False	147114285,147081187,147083114,147083744,147088026,147088907,147089347,147093887,147095064,147099688					1_147114285_A_T;			0.34405940594059403	1	-1	147101453	147142618
ENSG00000162909	ENSG00000162909	SDGFSIETCK	P17655	1_223969963_T_C	rs61824006	0.0011172840870838684	1.1106919248263344e-06	26.0	3.516667357457453e-11	-0.8987620416665245	0.12567239229740013	-0.15846193848883638	1.869420767392978e-21	-0.2604986653151105	0.5122558033010349	-0.042755756663495084	False	223969963,223960392,223965031,223966391,223966991,223993624,224019389,224026891,224035327,224035400,224035464,224035842,224036192,224038703,224043117,224043205,224043820,224047744					1_223960392_G_A;			0.22524752475247525	1	1	223889295	223963720
ENSG00000163110	ENSG00000163110	GALYCELCYEK	Q96HC4	4_95585225_A_G	rs1056772	4.023000650297732e-05	2.9632792498118247e-08	24.0	2.33407383009968e-11	0.7105151108593168	1.090383596308898e-08	0.5786086243520242	5.559908290224216e-08	0.4352673337780027	6.687890149598798e-14	0.6524271031615314	False	95585225,95562393,95564225,95568956,95569216,95575114,95579705,95581344,95581720,95581890,95582159,95583042,95585642,95585748,95586675,95587259,95588158,95588674,95588823,95589337,95589869,95589897,95593185,95594456,95595800,95596188,95596744		4_95585642_TA_T;		4_95589337_G_A;4_95588823_G_A;4_95588674_T_C;4_95588158_C_G;4_95587259_A_C;4_95585748_C_T;4_95585642_TA_T;4_95585225_A_G;	4_95585748_C_T;4_95585642_TA_T;4_95583042_G_C;4_95582159_C_T;4_95581890_G_A;4_95581720_G_A;4_95581344_C_T;4_95579705_T_C;4_95575114_T_G;4_95569216_A_T;4_95568956_A_C;4_95564225_T_A;4_95562393_T_C;4_95585225_A_G;	4_95575114_T_G;4_95569216_A_T;4_95568956_A_C;4_95564225_T_A;4_95562393_T_C;		0.21287128712871287	4	1	95373037	95589377
ENSG00000163378	ENSG00000163378	LPEEHIPFFLHNNR	Q5NDL2	3_69058783_C_T	rs56761230	0.0017802410006047106	3.8016578652653495e-06	13.0	9.758847791868593e-11	-0.7558315791432602	1.027344659636537e-08	-0.6713765625277204	2.949442873381216e-18	-0.6015139924459274	3.1555174163289085e-21	-0.6915843351110985	False	69058783,69054266,69054341,69054611,69056604,69059316,69060854,69063936,69064203,69064655,69066346,69066502,69070399,69070457,69073410,69073419,69073569,69080722,69082873,69084062,69084161,69089847,69090564,69091237,69093315,69093377,69093391		3_69060357_TAAGTGCTCTTTCCACTGGATGACAGAGTCTTAATACACACTGGATGTTCATCAGCTAGGACTGCTGTTTCCTGGGTCATACCGGAAAACCCAACTTTCGAAATCAGTCTTCATTGATTATGGGCTGTGAAGATGGAACCTTTAGAAACAGACTGCAGGCCTGTAATAGTAGCACTTTGGGAGGCCAAGACTGGCAGATTGCTTGAGTCCCTGAGTTCGAGACCAGCTTGGGCAACGTGATGAAACCCGGTCTCTGCTAAGAATACAAAAAATCAGCTGTAGTCCCAGCTGAAGTGGGAGGATCACTTTAGCCTGGGAAGTCAAGGATGCAGTGAGTCGTGATCTCGCCACTGCACTCCAGCCTGGGTAATGCGAGGGAGACTCTGTC…	3_69060357_TAAGTGCTCTTTCCACTGGATGACAGAGTCTTAATACACACTGGATGTTCATCAGCTAGGACTGCTGTTTCCTGGGTCATACCGGAAAACCCAACTTTCGAAATCAGTCTTCATTGATTATGGGCTGTGAAGATGGAACCTTTAGAAACAGACTGCAGGCCTGTAATAGTAGCACTTTGGGAGGCCAAGACTGGCAGATTGCTTGAGTCCCTGAGTTCGAGACCAGCTTGGGCAACGTGATGAAACCCGGTCTCTGCTAAGAATACAAAAAATCAGCTGTAGTCCCAGCTGAAGTGGGAGGATCACTTTAGCCTGGGAAGTCAAGGATGCAGTGAGTCGTGATCTCGCCACTGCACTCCAGCCTGGGTAATGCGAGGGAGACTCTGTC…	3_69060357_TAAGTGCTCTTTCCACTGGATGACAGAGTCTTAATACACACTGGATGTTCATCAGCTAGGACTGCTGTTTCCTGGGTCATACCGGAAAACCCAACTTTCGAAATCAGTCTTCATTGATTATGGGCTGTGAAGATGGAACCTTTAGAAACAGACTGCAGGCCTGTAATAGTAGCACTTTGGGAGGCCAAGACTGGCAGATTGCTTGAGTCCCTGAGTTCGAGACCAGCTTGGGCAACGTGATGAAACCCGGTCTCTGCTAAGAATACAAAAAATCAGCTGTAGTCCCAGCTGAAGTGGGAGGATCACTTTAGCCTGGGAAGTCAAGGATGCAGTGAGTCGTGATCTCGCCACTGCACTCCAGCCTGGGTAATGCGAGGGAGACTCTGTC…	3_69060854_C_T;3_69060357_TAAGTGCTCTTTCCACTGGATGACAGAGTCTTAATACACACTGGATGTTCATCAGCTAGGACTGCTGTTTCCTGGGTCATACCGGAAAACCCAACTTTCGAAATCAGTCTTCATTGATTATGGGCTGTGAAGATGGAACCTTTAGAAACAGACTGCAGGCCTGTAATAGTAGCACTTTGGGAGGCCAAGACTGGCAGATTGCTTGAGTCCCTGAGTTCGAGACCAGCTTGGGCAACGTGATGAAACCCGGTCTCTGCTAAGAATACAAAAAATCAGCTGTAGTCCCAGCTGAAGTGGGAGGATCACTTTAGCCTGGGAAGTCAAGGATGCAGTGAGTCGTGATCTCGCCACTGCACTCCAGCCTGGGTAATGC…	3_69060854_C_T;3_69060357_TAAGTGCTCTTTCCACTGGATGACAGAGTCTTAATACACACTGGATGTTCATCAGCTAGGACTGCTGTTTCCTGGGTCATACCGGAAAACCCAACTTTCGAAATCAGTCTTCATTGATTATGGGCTGTGAAGATGGAACCTTTAGAAACAGACTGCAGGCCTGTAATAGTAGCACTTTGGGAGGCCAAGACTGGCAGATTGCTTGAGTCCCTGAGTTCGAGACCAGCTTGGGCAACGTGATGAAACCCGGTCTCTGCTAAGAATACAAAAAATCAGCTGTAGTCCCAGCTGAAGTGGGAGGATCACTTTAGCCTGGGAAGTCAAGGATGCAGTGAGTCGTGATCTCGCCACTGCACTCCAGCCTGGGTAATGC…	3_69054341_T_C;	0.2376237623762376	3	-1	69024365	69063112
ENSG00000163389	ENSG00000163389	LVDAEYTK	Q8NBL1	3_119191398_T_C	rs6794833	0.06495060476414327	0.00026480314597254946	14.0	1.4613731399517634e-07	-0.5389061975461193	1.8095578060978504e-12	-0.6072307298327507	1.2174391432563926e-16	-0.580761135587071	4.492869056391061e-17	-0.6416245926857981	False	119191398,119192185,119196334,119196781		3_119192185_CAAATG_C;			3_119196781_G_A;3_119196334_G_T;3_119192185_CAAATG_C;3_119191398_T_C;	3_119196781_G_A;3_119196334_G_T;3_119192185_CAAATG_C;3_119191398_T_C;		0.4777227722772277	3	1	119187785	119213555
ENSG00000163527	ENSG00000163527	HLEEAFTSEHWLVR	Q8TCJ2	3_31709967_T_C	rs3765063	0.07054166782758009	0.0002452863320416457	17.0	4.2632311647511454e-07	-0.5583675707950122	0.7090291785112038	-0.04403522980404784	1.0116092527160494	-0.1894054373676745	0.1257537235643719	-0.16134559198122672	True	31709967,31573643,31574258,31575056,31576617,31576831,31587785,31590289,31602110,31602475,31603474,31605378,31615782,31617696,31633421,31636846,31649705,31649913,31651287,31655642,31661857,31664171,31666256,31668300,31673470,31675107,31679425,31679721,31684710,31685031,31687232,31688059,31701124,31703464,31705095,31711974,31715831,31715892		3_31675107_TA_T;3_31666256_CT_C;3_31649913_GA_G;3_31587785_TGTA_T;3_31587783_ATTG_A;			3_31675107_TA_T;3_31673470_C_T;3_31668300_A_G;3_31666256_CT_C;3_31664171_C_T;3_31661857_G_A;3_31655642_C_T;3_31651287_G_A;3_31649913_GA_G;3_31649705_G_A;3_31636846_A_G;3_31633421_G_A;3_31617696_G_T;3_31615782_T_C;3_31605378_A_G;3_31603474_G_A;3_31602475_A_G;3_31602110_T_A;3_31590289_G_A;3_31587785_TGTA_T;3_31587783_ATTG_A;3_31576831_T_A;3_31575056_A_G;			0.2079207920792079	3	1	31574130	31679112
ENSG00000163629	ENSG00000163629	GLLDQGIPSK	Q12923-3	4_87770252_G_A	rs17694522	0.02424030356817998	1.4701664784712664e-05	73.0	1.727173596132961e-11	-1.4592345288296145	0.595504073483256	-0.08393905234311494	0.13329245934057654	-0.4688871076797269	0.5977117251146884	-0.059884229206654635	False	87770252								0.05198019801980198	4	1	87515468	87736324
ENSG00000163840	ENSG00000163840	LLETELLQEISEIEK	Q8TDB6	3_122283735_T_A	rs56303024	7.911862007684612e-06	1.4742011980335092e-08	7.0	6.121600069483254e-13	1.1498936144598804	7.660479149671562e-05	0.4431333690549428	1.0882452607796195e-31	1.1059083984211575	3.113339236382786e-32	1.1867240099268397	False	122283735,122127746,122129203,122130141,122135255,122136935,122138061,122138888,122140919,122145470,122146660,122147674,122149614,122156456,122167127,122171941,122177846,122177865,122181797,122186439,122186896,122187501,122197397,122199495,122201610,122203543,122211288,122213955,122217851,122218961,122222250,122226160,122230495,122236448,122237033,122254647,122255708,122259640,122262599,122262896…					3_122289005_A_G;3_122283735_T_A;			0.18811881188118806	3	1	122283085	122294050
ENSG00000163913	ENSG00000163913	LLVYDTSDGTLLQPLK	Q9HBG6-3	3_129235647_G_C	rs111162337	1.5056969637051294e-05	1.1080574759825947e-08	20.0	4.745752341385022e-14	-0.9387807933820378	2.6819483336539105e-05	-0.6538862793088331	6.985465763224218e-12	-0.8463414761919734	1.5990411724277422e-16	-1.0324673167393763	True	129235647,129090995,129092491,129093907,129101389,129116641,129118877,129121815,129123954,129124378,129125231,129129116,129130775,129131031,129131782,129134600,129134893,129135631,129136060,129136205,129137025,129138308,129140489,129140903,129143077,129143152,129143596,129143662,129143708,129146208,129146453,129146646,129146887,129147615,129148323,129148372,129148965,129149021,129149136,129149260…		3_129235702_AGG_A;3_129228166_TCTC_T;3_129218263_AAGC_A;3_129213057_T_TG;3_129206215_TGCTG_T;3_129206214_TTGC_T;3_129197276_G_GTTTTA;3_129197108_TC_T;3_129192774_CT_C;3_129186141_CT_C;3_129179623_C_CTG;3_129172697_A_AC;3_129171857_GC_G;3_129168854_CTT_C;3_129165233_A_ATTTTTTGTA;			3_129237482_T_C;3_129235702_AGG_A;3_129228166_TCTC_T;3_129224193_C_T;3_129224106_T_G;3_129220982_G_A;3_129220891_G_A;3_129219925_G_A;3_129218944_G_T;3_129218448_G_C;3_129218263_AAGC_A;3_129217478_C_T;3_129215668_A_C;3_129214769_C_T;3_129214511_G_A;3_129213057_T_TG;3_129212824_T_G;3_129212817_A_G;3_129212177_C_T;3_129211999_G_A;3_129210638_G_C;3_129210142_G_C;3_129209590_G_A;3_129209471_A_G;3_1292…	3_129237482_T_C;3_129235702_AGG_A;3_129228166_TCTC_T;3_129224193_C_T;3_129224106_T_G;3_129220982_G_A;3_129220891_G_A;3_129219925_G_A;3_129218944_G_T;3_129218448_G_C;3_129218263_AAGC_A;3_129217478_C_T;3_129215668_A_C;3_129214769_C_T;3_129214511_G_A;3_129213057_T_TG;3_129212824_T_G;3_129212817_A_G;3_129212177_C_T;3_129211999_G_A;3_129210638_G_C;3_129210142_G_C;3_129209590_G_A;3_129209471_A_G;3_1292…		0.12128712871287127	3	1	129158968	129239198
ENSG00000163938	ENSG00000163938	GGIPNVEGAAK	Q9BVP2-2	3_52572056_A_G	rs7638808	0.035864894912716265	6.670236908001582e-05	26.0	7.373147944340101e-08	0.4158582747195685	2.809495489069358e-07	0.4150297793081772	9.893445589871329e-07	0.2509637400172962	0.28985401908074904	-0.06460942235661378	True	52572056,52546820,52556890,52557038,52558133,52558904,52560021,52561779,52563572,52563718,52567188,52569098,52572447,52572841,52573096,52573844,52575831								0.452970297029703	3	1	52715172	52728508
ENSG00000163956	ENSG00000163956	VHEYNVLL	P30533	4_3510954_G_A	rs1730765	2.764586908397466e-07	1.9139775003008152e-10	14.0	7.580918640124331e-14	0.7280828966479791	8.41011089354422e-12	0.6589199375752146	1.1609213995206308e-16	0.7633192930283507	3.2113826854895874e-17	0.6373258167032136	False	3510954,3495725,3498170,3501404,3502303,3505162,3506182,3509259,3514695,3517049,3517732,3518216,3518447,3521939		4_3518216_A_AGCCC;4_3510925_TGGCAGTCAACGCATGGACACCGGAGACTGTTGAGACGCCGACTGGAGTCACACAC_T;4_3510911_CCTGGAGTCATACATGGCAGTCAACGCATGGACACCGGAGACTGTTGAGACGCCGACTGGAGTCACACACGGCAGTCAACGCGTGGACACCGGAGACTGTTGAGACGCCGACTGGAGTCACACACGGCAGTCAACGCGTGGACACCGGAGACTGTTGAGACGCCGACTGGAGTCACACACGGCAGTCAACGCGTGGACACCGGAGACTGTTGAGACGCCGACTGGAGTCACACACGGCAGTCAACGCGTGGACACCGGAGACTGTTGAGACGCCGACTGGAGTCACACACGGCAGTCAACGC…		4_3517732_G_C;4_3514695_A_G;4_3509259_C_T;4_3510954_G_A;4_3510925_TGGCAGTCAACGCATGGACACCGGAGACTGTTGAGACGCCGACTGGAGTCACACAC_T;4_3510911_CCTGGAGTCATACATGGCAGTCAACGCATGGACACCGGAGACTGTTGAGACGCCGACTGGAGTCACACACGGCAGTCAACGCGTGGACACCGGAGACTGTTGAGACGCCGACTGGAGTCACACACGGCAGTCAACGCGTGGACACCGGAGACTGTTGAGACGCCGACTGGAGTCACACACGGCAGTCAACGCGTGGACACCGGAGACTGTTGAGACGCCGACTGGAGTCACACACGGCAGTCAACGCGTGGACACCGGAGACTG…	4_3521939_T_A;4_3518447_T_C;4_3518216_A_AGCCC;4_3518216_AGCCCGCCC_AGCCCGCCCGCCC;4_3517732_G_C;4_3517049_T_C;	4_3521939_T_A;4_3518447_T_C;4_3518216_A_AGCCC;4_3518216_AGCCCGCCC_AGCCCGCCCGCCC;4_3517732_G_C;		0.3712871287128713	4	-1	3508103	3534286
ENSG00000164109	ENSG00000164109	SFTTTIHK	Q13257	4_120978603_G_C	rs4834834	0.0015908122309580715	5.425170346093699e-06	8.0	8.130793366824831e-07	0.4937232846216261	0.007670428232809703	0.22844091368553965	0.012237745052276134	0.22372189390504588	0.7181087945624476	0.0172692530281856	True	120978603,120984875,120986273,120987349,120988116,120989853,120995223,120995441		4_120986272_AA_A;		4_120988116_G_T;4_120978603_G_C;	4_120987349_A_C;4_120986273_A_G;4_120986272_AA_A;4_120984875_C_T;	4_120987349_A_C;4_120986273_A_G;4_120986272_AA_A;4_120984875_C_T;		0.452970297029703	4	-1	120976763	120988229
ENSG00000164142	ENSG00000164142	VLQPFLTHR	Q05DH4	4_152297368_T_C	rs9968292	0.0795464830040044	0.0002956348184763342	17.0	4.791504793152914e-07	-0.4471958308880011	1.6470799181931594e-08	-0.4827343482274252	0.0006871791187519779	-0.2370364294368313	2.9812822451618447e-17	-0.4286388145574336	False	152297368,152261703,152263402,152263830,152278358,152278707,152280898,152291432,152291689,152301185,152302783,152304376,152304728,152306552,152310788,152311322,152316139,152316901,152318924,152319045,152320532,152321631,152321881,152322146,152322571,152322659,152325385,152325939,152326990,152327017,152329404,152330294,152331252,152332120,152334662,152335749,152340446,152341717,152341878,152342190…		4_152452656_CT_C;4_152452653_CTTCT_C;4_152452098_T_TC;4_152444630_AT_A;4_152411893_TA_T;4_152389986_CT_C;4_152375317_A_AG;4_152373929_CA_C;4_152356319_ACTATAGTC_A;4_152355268_C_CC;4_152346935_G_GCAT;			4_152452656_C_T;4_152452656_CT_C;4_152452653_CTTCT_C;4_152452398_G_A;4_152452128_T_G;4_152452098_T_TC;4_152451819_T_C;4_152451453_G_A;4_152450300_A_G;4_152450126_G_A;4_152450095_C_A;4_152447972_G_A;4_152447006_T_A;4_152446832_T_A;4_152445831_A_C;4_152445227_A_G;4_152444631_T_A;4_152444630_AT_A;4_152443273_C_T;4_152441914_G_A;4_152438850_G_C;4_152434062_T_G;4_152434028_G_T;4_152433522_G_C;4_152432…			0.4925742574257426	4	1	152330368	152584784
ENSG00000164307	ENSG00000164307	MAFPCFDEPAFK	Q9NZ08	5_96121715_C_T	rs469758	0.00013332322458865803	1.090154403122129e-07	24.0	9.932557367528469e-11	-0.68791667157309	3.8302202557475144e-15	-0.8286859845347017	6.92294699952035e-14	-0.7886775173946442	3.9701286594133507e-17	-0.8267117916890276	True	96121715,96121994,96122260,96122281,96123088,96123125,96123210,96123264,96123336,96123666,96124330,96125910,96126197,96126308	5_96124330_T_C;		5_96122260_T_G;		5_96126197_A_G;5_96125910_C_T;5_96123666_G_T;5_96123336_T_C;5_96123264_C_A;5_96123210_C_T;5_96123125_T_C;5_96123088_C_T;5_96122281_A_C;5_96122260_T_G;5_96121994_A_G;5_96121715_C_T;		5_96126308_A_G;	0.3094059405940594	5	-1	96096521	96143803
ENSG00000164414	ENSG00000164414	ELYFSTTAVCITEVIK	P78382	6_88406394_G_A		0.06392093031472716	0.0011932110959791118	3.0	2.136914029259738e-06	-1.435159967366383	0.5375111831000743	-0.10272601581957684	0.7091711529225624	-0.27578270807112204	0.2342557081012089	0.21015765590150665	False	88406394,88203224,88206640,88209391,88213852,88213932,88223890,88232685,88232876,88235329,88237172,88239266,88246644,88250620,88251077,88251827,88252601,88252962,88256632,88265819,88278055,88279872,88283419,88286908,88288211,88292554,88297838,88298650,88301167,88305125,88308611,88309473,88313373,88314130,88315563,88315795,88318248,88323878,88324335,88331058,88334600,88337580,88346369,88353319,883…					6_88213932_C_T;6_88213852_T_C;6_88209391_G_A;6_88206640_A_G;6_88203224_T_C;			0.0594059405940594	6	1	88180341	88222054
ENSG00000164631	ENSG00000164631	LFSQLSYLTIHHR	P17014	7_6956339_A_G	rs4385383	0.000364641338839188	2.7343373499967025e-06	3.0	2.8082184930490066e-07	0.9860923137529104	0.8725011510713738	0.018337623028823247	1.7837052822808286	0.09756812407079278	0.9532672667027648	-0.0036172411092363225	False	6956339,6966123								0.3217821782178218	7	-1	6728064	6746554
ENSG00000164904	ENSG00000164904	DLPLAQGIK	A0A1B0GW77	5_125931022_T_G	rs900641	9.812733065039424e-06	4.461934384007396e-09	30.0	5.607546966307788e-08	0.6015673223510118	1.236797657646612e-08	0.7256974323122485	3.632308318105475e-08	0.8180498157781665	1.4854132084764074e-06	0.6141847216408629	False	125931022,125904762,125904970,125908203,125908586,125908599,125909367,125909451,125909560,125910078,125910115,125910169,125912120,125912471,125913012,125913560,125913691,125914326,125914671,125914726,125915374,125915685,125915744,125915779,125915922,125916032,125916297,125917249,125917657,125918041,125918148,125919066,125919360,125921381,125921498,125926839,125927917,125928737,125932722		5_125915685_TTTAATTG_T;5_125914671_AGCCTCTTCCTGGCAGGGCCT_A;5_125913012_GT_G;		5_125931022_T_G;	5_125928737_C_T;5_125927917_C_T;5_125926839_T_C;5_125921498_G_A;5_125921381_G_A;5_125919360_G_C;5_125919066_G_A;5_125918148_A_G;5_125918041_C_T;5_125917657_G_A;5_125917249_G_T;5_125916032_G_A;5_125915922_C_G;5_125915779_G_A;5_125915744_T_C;5_125915685_TTTAATTG_T;5_125915374_G_T;5_125914726_A_T;5_125914671_AGCCTCTTCCTGGCAGGGCCT_A;5_125914326_G_A;5_125913691_T_C;5_125913560_A_C;5_125913012_GT_G;5_1…	5_125928737_C_T;5_125927917_C_T;5_125926839_T_C;5_125921498_G_A;5_125921381_G_A;5_125919360_G_C;5_125919066_G_A;5_125918148_A_G;5_125918041_C_T;5_125917657_G_A;5_125917249_G_T;5_125916032_G_A;5_125915922_C_G;5_125915779_G_A;5_125915744_T_C;5_125915685_TTTAATTG_T;5_125915374_G_T;5_125914726_A_T;5_125914671_AGCCTCTTCCTGGCAGGGCCT_A;5_125914326_G_A;5_125913691_T_C;5_125913560_A_C;5_125913012_GT_G;5_1…		0.11633663366336636	5	-1	125877533	125931110
ENSG00000164978	ENSG00000164978	AALQEGHQFLCSIEA	P50583	9_34270176_G_A	rs79645455	6.696201251096142e-06	1.224796208255333e-08	7.0	3.8520530850534204e-14	1.1891209544708692	1.2310534296027039e-11	0.7750095055642703	1.1314209705625155e-23	1.239548848441709	1.4351737086904346e-19	1.0003871001779334	False	34270176,34165200,34207275,34226942,34263389,34264597,34268702,34269079,34271381,34282388,34284727,34284752,34287840,34296170,34299264,34305075,34305076,34306746,34307413,34307722,34309431,34310083,34310357,34312748,34314383,34317367,34318193,34318289,34320195,34320525,34324168,34324677,34326983,34329110,34329851,34332740,34334793,34336342,34336681,34337967,34338552,34340949,34342001,34342634,343…		9_34338552_AC_A;9_34329851_G_GGGT;	9_34336342_A_G;		9_34342634_A_G;9_34342001_C_A;9_34340949_A_G;9_34338552_AC_A;9_34337967_G_A;9_34336681_A_T;9_34336342_A_G;9_34334793_G_A;9_34332740_A_G;9_34329851_G_GGGT;			0.16336633663366334	9	1	34329504	34343709
ENSG00000165410	ENSG00000165410	ASGVTVNDEVIK	Q9Y281	14_35185345_A_G	rs6571678	0.023090846463147845	0.0001008514892790351	10.0	4.389713846274939e-08	0.5830267465381649	1.7422859329961616e-09	0.5589542602484538	5.799952042716576e-12	0.5566424038001516	8.116435828343064e-21	0.6642935550476533	False	35185345,35157435,35160847,35161508,35168159,35171392,35173775,35174105,35174746,35175015,35175244,35175267,35176673,35176730,35177423,35177730,35178281,35180033,35181146,35181786,35182348,35183888,35184228,35188713,35189521		14_35182348_GAA_GAAA;14_35182348_GA_G;	14_35182348_GAA_GAAA;14_35182348_GA_G;	14_35183888_C_G;14_35181786_T_C;14_35181786_T_C;14_35181146_A_G;14_35180033_C_A;14_35180033_C_A;	14_35182348_GAA_GAAA;14_35182348_GA_G;	14_35183888_C_G;14_35182348_GAA_GAAA;14_35182348_GA_G;14_35181786_T_C;14_35181786_T_C;		0.17326732673267325	14	-1	35179593	35184029
ENSG00000165832	ENSG00000165832	SLVSDIGK	Q8WWH5	10_116719543_G_A		0.03232584402634127	0.00011024130127446766	14.0	4.733520489642981e-08	0.3596036157018849	1.8036352536619602e-07	0.377208493316302	1.3176281312198427e-16	0.4056017783623149	8.083405675474306e-09	0.3372755684866005	False	116719543,116670560,116674343,116676281,116676483,116681328,116681477,116682893,116683171,116683576,116684202,116685463,116687056,116687214,116689868,116691727,116693443,116694137,116697194,116699245,116700436,116700632,116706484,116706785,116708190,116709965,116712329,116713151,116713365,116713823,116714667,116714959,116715700,116716902,116717665,116718454,116721802	10_116719543_G_A;	10_116714667_CT_C;10_116699245_TA_T;			10_116721802_A_G;10_116718454_G_C;10_116717665_T_C;10_116716902_T_C;10_116715700_T_A;10_116714959_C_T;10_116714667_CT_C;10_116713365_T_C;10_116713151_C_A;10_116712329_T_C;10_116709965_T_C;10_116708190_G_A;10_116706785_C_T;10_116700632_G_A;10_116700436_C_T;10_116699245_TA_T;			0.4405940594059406	10	1	116697952	116737430
ENSG00000165916	ENSG00000165916	QIQELVEAIVLPMNHK	R4GNH3	11_47640429_G_C	rs1064608	0.053694041007612034	9.748333234310815e-05	29.0	6.7849699033423225e-06	0.5021913376132576	0.014717874772199309	0.3170949884533517	0.8154877698272087	0.13327688857884035	0.08504744050421248	0.08164629577250314	False	47640429,47397353,47398963,47409212,47410200,47410393,47410951,47411065,47411581,47413475,47413733,47416636,47418306,47418465,47419129,47419301,47419757,47421134,47423553,47423920,47424400,47424717,47426956,47427825,47428565,47429245,47430458,47431966,47432034,47432303,47434777,47437202,47437403,47438282,47439444,47439938,47440283,47442893,47443080,47443251,47443581,47443594,47446292,47448497,474…		11_47443581_CT_C;			11_47446292_A_T;11_47443594_G_C;11_47443581_CT_C;11_47443251_C_T;11_47443080_T_C;11_47442893_T_A;	11_47446292_A_T;		0.3663366336633663	11	-1	47440320	47447993
ENSG00000165983	ENSG00000165983	VQTVLGLVEPSK	Q96BW5-2	10_16485699_G_T		2.356067822796608e-06	3.524093309196793e-09	8.0	3.699989295975316e-12	0.5938330902600066	3.6248612082227935e-15	0.6940444146588947	1.1369559338988294e-14	0.7362985445351634	3.110619905017449e-32	1.0047334374896617	False	16485699,16468029,16469650,16471628,16472204,16475889,16476762,16476820,16477106,16477295,16477550,16477596,16477877,16479007,16479251,16479256,16479650,16480176,16480599,16482481,16483081,16484888,16486464,16488531,16488704,16490542,16491917,16493086,16493138,16493159,16493210,16505606		10_16493210_T_TG;10_16480176_TG_T;10_16480175_TTG_T;		10_16479007_C_G;	10_16505606_G_A;10_16493210_T_TG;10_16493159_T_C;10_16493138_G_A;10_16493086_G_A;10_16491917_T_C;10_16490542_G_A;10_16488704_C_G;10_16488531_T_C;10_16486464_A_T;10_16484888_C_T;10_16483081_G_A;10_16482481_C_G;10_16480599_C_T;10_16480176_TG_T;10_16480175_TTG_T;10_16479650_C_T;10_16479256_T_C;10_16479251_C_G;10_16485699_G_T;			0.4727722772277228	10	1	16478942	16555736
ENSG00000166073	ENSG00000166073	YIGSADFQAK	Q14439-2	15_39966432_G_T	rs4432244	0.0847586818683566	0.0027282619866684124	2.0	2.0424799369924806e-05	0.8290435708024186	0.2713366113961698	0.19298652182369985	1.1397291961337586	0.08081184082214796	0.8104002743078578	-0.023539317456593132	False	39966432								0.32673267326732675	15	-1	40091233	40213093
ENSG00000166394	ENSG00000166394	LFYHGPGN	Q6BCY4	11_7686395_T_G	rs1128643	0.08694127056745002	0.0005135499898628842	11.0	5.3618265165183666e-08	0.3278156810621207	1.981492008826976e-05	0.29952148965466563	1.964239571962782e-11	0.5651407305490812	1.1222516786008819e-10	0.5227749227606818	False	7686395,7670943,7672668,7673099,7673106,7673388,7676019,7685028,7685233,7685341,7685933,7686050,7686058,7686297,7686302,7686331,7686332,7686584,7686810,7686915,7686959,7686970,7687448,7687863,7687913		11_7687448_C_CGT;11_7686778_CTGAAATGAAGGAGATGCAGGAGCAAGCTGAGCGATGCCAGGTGGAGTTCCTGATCCCAGGCCGCCTGCACACCCACCCTCAGCCAGGGAGGAGGTGACAAGCTGCTCTACAAAGGCTTAGAAGTCTGTACTACTGCTCCCTGCAAAAAGCCTCAGAACTAGTAAACAGCCCTCTGCAGCAATCACCCCAGGTCCCAGGCTCACTGCAGGGACCCTGAAGCCCTGCTGCTGTCTGTCAGCTGTCAGCATTGACGAGGAAGGAGAACACAACGAGGTATACCGAGGTGTGTGAATCAGTACAGCCAGCTGGAGTTGTCCGGCAGGGTGTGGCCTGGTGTTAGTGGAACTGCGCAGAATTGCTCAGTAGGGTA…	11_7686778_CTGAAATGAAGGAGATGCAGGAGCAAGCTGAGCGATGCCAGGTGGAGTTCCTGATCCCAGGCCGCCTGCACACCCACCCTCAGCCAGGGAGGAGGTGACAAGCTGCTCTACAAAGGCTTAGAAGTCTGTACTACTGCTCCCTGCAAAAAGCCTCAGAACTAGTAAACAGCCCTCTGCAGCAATCACCCCAGGTCCCAGGCTCACTGCAGGGACCCTGAAGCCCTGCTGCTGTCTGTCAGCTGTCAGCATTGACGAGGAAGGAGAACACAACGAGGTATACCGAGGTGTGTGAATCAGTACAGCCAGCTGGAGTTGTCCGGCAGGGTGTGGCCTGGTGTTAGTGGAACTGCGCAGAATTGCTCAGTAGGGTAGCGCCCTCTGCCGACCA…	11_7686778_CTGAAATGAAGGAGATGCAGGAGCAAGCTGAGCGATGCCAGGTGGAGTTCCTGATCCCAGGCCGCCTGCACACCCACCCTCAGCCAGGGAGGAGGTGACAAGCTGCTCTACAAAGGCTTAGAAGTCTGTACTACTGCTCCCTGCAAAAAGCCTCAGAACTAGTAAACAGCCCTCTGCAGCAATCACCCCAGGTCCCAGGCTCACTGCAGGGACCCTGAAGCCCTGCTGCTGTCTGTCAGCTGTCAGCATTGACGAGGAAGGAGAACACAACGAGGTATACCGAGGTGTGTGAATCAGTACAGCCAGCTGGAGTTGTCCGGCAGGGTGTGGCCTGGTGTTAGTGGAACTGCGCAGAATTGCTCAGTAGGGTAGCGCCCTCTGCCGACCA…	11_7687913_C_T;11_7687863_C_A;11_7687448_C_CGT;11_7687448_C_T;11_7686778_CTGAAATGAAGGAGATGCAGGAGCAAGCTGAGCGATGCCAGGTGGAGTTCCTGATCCCAGGCCGCCTGCACACCCACCCTCAGCCAGGGAGGAGGTGACAAGCTGCTCTACAAAGGCTTAGAAGTCTGTACTACTGCTCCCTGCAAAAAGCCTCAGAACTAGTAAACAGCCCTCTGCAGCAATCACCCCAGGTCCCAGGCTCACTGCAGGGACCCTGAAGCCCTGCTGCTGTCTGTCAGCTGTCAGCATTGACGAGGAAGGAGAACACAACGAGGTATACCGAGGTGTGTGAATCAGTACAGCCAGCTGGAGTTGTCCGGCAGGGT…			0.400990099009901	11	-1	7686331	7698453
ENSG00000166582	ENSG00000166582	RSGASAAPAASAAAALAPSATR	Q7Z7K6-3	17_16243508_G_A	rs3112518	1.0966796368700799e-12	1.9684329966556423e-16	12.0	1.199055796539785e-24	-1.0189637713953836	1.5954186238992547e-25	-1.0256241685280385	0.2001555514956838	-0.04244823963767655	0.01968629474650128	0.13677991700506684	False	16243508,16225506,16234260,16236388,16239978,16240104,16240345,16240430,16240676,16241303,16241544,16242349,16242993,16243298,16243866,16244142,16244384,16244657,16244853,16244997,16245127,16245333,16245481,16245778,16246016,16246608,16246874,16247100,16248083,16248598,16248642,16248906,16250834,16251016,16254494,16263682		17_16251016_CAG_C;		17_16246016_A_C;	17_16254494_C_G;17_16251016_CAG_C;17_16248906_C_T;17_16248598_C_T;17_16248083_T_A;17_16247100_T_C;17_16246874_G_A;17_16246608_G_A;			0.4084158415841584	17	-1	16245848	16256970
ENSG00000166689	ENSG00000166689	SNLAQVEHWAR	E9PKC0	11_17025740_G_A	rs4757484	0.005869855651056192	9.131042654508853e-06	22.0	4.6160119796884814e-10	-0.9096748522521501	3.9103574530859954e-08	-0.5266714048252676	1.294815623962378e-15	-0.6879755351383205	6.562034690871783e-23	-0.820631322814032	False	17025740,17003732,17004484,17005023,17012674,17015751,17015954,17017415,17018877,17021663,17022030,17022894,17023880,17024535,17024699,17024847,17025675,17025712,17025944,17026073,17026639,17026666,17026854,17026873,17027168,17027298,17027329,17027429,17027555,17027653,17027688,17027805,17028003,17028019,17028037,17028070,17028328,17028745,17028918,17029099,17029107,17029152,17029262,17029648,170…		11_17035712_GCGCGGATG_G;11_17034555_CCAGT_C;11_17028019_CA_C;11_17026666_CG_C;11_17026665_AC_A;			11_17035314_C_T;11_17035251_G_T;11_17035119_C_G;11_17035086_G_A;11_17035064_G_A;11_17034875_C_A;11_17034644_C_G;11_17034637_T_C;11_17034555_CCAGT_C;11_17034145_T_C;11_17033990_G_A;11_17033118_C_A;11_17032973_C_T;11_17032483_C_G;11_17032288_T_A;11_17032276_A_G;11_17031650_C_T;11_17031276_G_A;11_17030940_G_A;11_17030775_T_C;11_17030660_T_G;11_17030617_A_G;11_17030553_G_A;11_17030500_C_T;11_17030101…		11_17035718_A_G;	0.3094059405940594	11	-1	16799842	17035990
ENSG00000166848	ENSG00000166848	FNLDLSTVTQAFLK	Q9NYB0	16_75726136_T_G	rs10871314	2.89723187064884e-05	3.011810682812229e-08	16.0	9.58141259826473e-12	-1.4894155604037482	0.09198582797649356	-0.2844077770743573	0.7960546922074956	-0.10818868060845743	0.3254632446154251	0.12737052591242873	True	75726136,75537283,75558483,75559308,75574030,75576185,75581649,75583499,75585202,75589161,75589407,75590092,75597136,75608786,75615561,75618003,75618058,75622308,75625727,75626643,75628094,75630348,75630451,75632561,75633618,75635107,75637848,75639105,75639113,75639494,75643673,75646576,75647087,75647956,75651705,75652704,75653858,75653917,75655253,75655406,75656907,75658731,75660807,75663106,756…	16_75690279_A_G;	16_75784663_A_AACAGGT;16_75763809_TCCCG_T;16_75754001_ATGT_A;		16_75690279_A_G;	16_75785289_G_A;16_75784835_T_G;16_75784681_C_T;16_75784663_A_AACAGGT;16_75783867_C_T;16_75783693_G_A;16_75782931_T_C;16_75782744_A_G;16_75780199_T_G;16_75777426_C_A;16_75777340_C_T;16_75777328_G_A;16_75776529_C_A;16_75775631_T_G;16_75775505_G_A;16_75775221_T_C;16_75774374_C_T;16_75773561_A_G;16_75773239_T_C;16_75773226_A_T;16_75770217_C_T;16_75768971_A_G;16_75768894_A_C;16_75768121_A_G;16_757677…	16_75690279_A_G;16_75689521_A_C;16_75685746_T_C;16_75683326_C_G;		0.061881188118811874	16	1	75681684	75795770
ENSG00000167186	ENSG00000167186	TSVGPVIQK	H3BP28	16_19076604_G_A	rs34116405	0.0037550913304215134	1.6689580093840814e-05	7.0	1.208308590784705e-07	-0.4893069837615331	0.0004514713128855903	-0.3574923456555737	0.02277335727571149	-0.3005683591575741	6.779456652023616e-07	-0.40044293188946256	False	19076604,19049378,19050618,19051151,19051520,19064865,19066636,19067444,19071432,19080658,19082101,19082750,19083549,19085298,19087730,19095374,19095452,19095515,19095516	16_19085298_C_T;				16_19087730_C_T;16_19085298_C_T;16_19083549_C_T;16_19082750_G_T;16_19082101_A_T;16_19080658_T_G;	16_19087730_C_T;16_19085298_C_T;16_19083549_C_T;16_19082750_G_T;16_19082101_A_T;16_19080658_T_G;		0.2871287128712871	16	1	19078921	19091417
ENSG00000167220	ENSG00000167220	TFFLEALR	Q9H0R4	18_44663687_C_T	rs79420880	0.05419862199734272	0.00035951433953326697	8.0	8.253064061452262e-08	0.6387686587288925	3.116289211621967e-06	0.7208818723322734	5.014520466169657e-18	1.0845583212754482	4.680678242917122e-21	1.384460767498138	False	44663687,44664015,44665087,44665657,44666924,44667462,44669157,44669653,44669852,44671834,44672058,44672405,44673340,44674094,44674167,44675821,44676506,44676639,44676727,44676872,44677466,44677467,44677627,44677729,44678425,44678645,44679781,44682893,44683594,44684464,44685377,44686165,44686823,44687548,44687906,44688454,44688516,44689220,44689642,44689644,44690504,44690852,44691010,44691324,446…		18_44676506_T_TCCGCC;		18_44676872_G_A;18_44676506_T_TCCGCC;18_44663687_C_T;	18_44676727_C_A;18_44676639_G_A;18_44676506_T_TCCGCC;18_44675821_C_T;18_44674167_T_C;18_44674094_C_T;18_44673340_T_C;18_44672405_C_A;18_44672058_C_T;18_44671834_G_A;18_44669852_C_T;18_44669653_A_G;18_44669157_A_T;18_44667462_A_G;18_44666924_C_G;18_44665657_A_G;18_44665087_T_C;18_44664015_A_T;18_44663687_C_T;	18_44676727_C_A;18_44676639_G_A;18_44676506_T_TCCGCC;18_44675821_C_T;18_44674167_T_C;18_44674094_C_T;18_44673340_T_C;18_44672405_C_A;18_44672058_C_T;18_44671834_G_A;18_44669852_C_T;18_44669653_A_G;18_44669157_A_T;18_44667462_A_G;18_44666924_C_G;18_44665657_A_G;18_44665087_T_C;18_44664015_A_T;18_44663687_C_T;		0.06683168316831684	18	-1	44633774	44676891
ENSG00000167306	ENSG00000167306	YFATVGGSASETNIEEK	Q9ULV0	18_47851419_T_C		0.06472069313480436	0.00033117293720453416	11.0	3.322561466258944e-06	-1.259798858751835	0.9815543417040334	-0.00258097272225688			0.04270084603315648	0.15277117089644082	True	47851419								0.3143564356435644	18	-1	47349183	47721463
ENSG00000167468	ENSG00000167468	ILAFPCNQFGK	A0A087X2I2	19_1097373_T_C	rs112276291	0.00372312530073478	1.635657365576913e-05	7.0	1.3339871806248214e-08	0.5728930874685725	2.7687574243069946e-09	0.7522537760828971	0.0005568438898740176	0.5247090653019245	0.007098803893454446	0.15731414034608426	False	1097373,1104078,1105621							19_1104078_G_A;	0.1608910891089109	19	1	1103936	1106787
ENSG00000167720	ENSG00000167720	SSIGLNTWPIIR	Q9GZT4	17_2155430_G_A	rs216221	0.07366129750870541	0.0011216512771072406	4.0	5.647330727435269e-07	-0.9038961992057776	0.00045497898241835606	-0.3781759857469025	2.6247888393810683e-05	-0.43186951578915855	6.471980302658312e-06	-0.4401817543012112	False	2155430,2096441,2096580,2097483,2097583,2098272,2098417,2099931,2100512,2101134,2102453,2103810,2103820,2105299,2108578,2109109,2112431,2112567,2112720,2115922,2117652,2117945,2119101,2119818,2121322,2121566,2121745,2123200,2124972,2125444,2125605,2126504,2129210,2130592,2131773,2132324,2133205,2133250,2134214,2134225,2135980,2136065,2138016,2138828,2143460,2143776,2145090,2145329,2147291,2148821…				17_2207236_C_G;	17_2209888_G_A;17_2209871_C_T;17_2208899_G_T;17_2207236_C_G;			0.3193069306930693	17	1	2206677	2228554
ENSG00000168118	ENSG00000168118	FLVIGNAGTGK	P20338	1_229552870_G_A	rs12124037	0.056669729881340135	0.00027740901418085067	11.0	8.813966150600634e-07	0.5930099604376895	4.668003000079628e-08	0.7410628338289986	6.63584135238797e-09	0.539573825574485	6.492369033073613e-08	0.5583718159252217	False	229552870,229536441,229536654,229541395,229542869,229545085,229545782,229545842,229549517,229550597,229551421,229552874,229552959								0.15594059405940594	1	1	229406822	229441641
ENSG00000168246	ENSG00000168246	STDTVFHMK	Q8WUN7	5_171721731_C_A	rs6861431	0.05800092445402221	0.000524000214943003	6.0	1.2674391293152464e-05	0.6747734938572361	0.3351803389246353	0.09545925038166514	0.3536843471373208	-0.03956331651596244	0.5466497074889373	-0.031212171707963112	False	171721731								0.4752475247524752	5	-1	171636644	171711075
ENSG00000168461	ENSG00000168461	NAINIEELFQGISR	Q13636	18_9743635_G_A	rs16955490	0.0058854628466081535	2.9064631140218828e-05	7.0	7.841613666021517e-09	0.6547688037788613	0.04005778744596087	0.2351693780063714	3.314685471893216e-08	0.3917801000928555	1.2434336710418148e-10	0.4238749882613183	False	9743635					18_9743635_G_A;	18_9743635_G_A;		0.19554455445544555	18	1	9708162	9862548
ENSG00000168488	ENSG00000168488	LVIPAEGQSTGK	H3BSK9	16_28823097_A_G	rs62036613	0.00015518636477682255	7.903994671426241e-08	39.0	5.885088944348263e-12	0.7502746342446893	9.552993053828424e-08	0.6089997165281018	5.232434630381268e-34	0.5095258257518946	0.08918682210412616	-0.09975678721728523	False	28823097,28526897,28529716,28531353,28532188,28533071,28534038,28535003,28535305,28536473,28536762,28537971,28539293,28539848,28541394,28543381,28545449,28555706,28558289,28561982,28565667,28566158,28823040,28823630,28824685,28825100,28825420,28825605,28825777,28825866,28825953,28826307,28827498,28828643,28828834,28831359,28832382,28833097,28833229,28833299,28836205,28836378,28837203,28837515,288…		16_28845027_TGATCAGGG_T;16_28842584_G_GGTTGT;16_28839929_TG_T;	16_28847246_T_C;16_28846866_G_A;		16_28847246_T_C;16_28847149_G_C;16_28846866_G_A;16_28846840_T_G;16_28845251_G_A;16_28845027_TGATCAGGG_T;16_28844365_G_A;16_28844284_A_G;16_28843118_A_G;16_28843025_C_T;16_28842584_G_GGTTGT;16_28842584_G_T;16_28841777_C_T;16_28840381_A_G;16_28839930_G_T;16_28839929_TG_T;16_28839425_T_C;16_28839392_G_A;16_28837906_A_G;16_28837515_T_C;16_28837203_T_G;16_28836205_T_C;	16_28847246_T_C;16_28847149_G_C;16_28846866_G_A;16_28846840_T_G;16_28845251_G_A;16_28845027_TGATCAGGG_T;16_28844365_G_A;16_28844284_A_G;16_28843118_A_G;16_28843025_C_T;16_28842584_G_GGTTGT;16_28842584_G_T;16_28841777_C_T;16_28840381_A_G;16_28839930_G_T;16_28839929_TG_T;16_28839425_T_C;16_28839392_G_A;16_28837906_A_G;16_28837515_T_C;16_28837203_T_G;		0.3663366336633663	16	1	28834356	28848558
ENSG00000169087	ENSG00000169087	GGIFGSDGK	Q96EW2	3_122471831_G_A	rs4048549	0.02058596588659717	8.646253471575453e-05	10.0	9.160701649811342e-08	0.732615953495162	2.4536681848242354e-05	0.4182048711989257	0.0026399578214809268	0.34635587044011185	5.848659705816457e-06	0.3856063461530037	False	122471831,122412522,122473430,122474305,122474540,122476515,122477795,122479687,122486473,122491770,122493315,122499441,122508027,122508758		3_122508758_G_GA;			3_122508758_G_GA;3_122508027_T_A;3_122499441_G_A;3_122493315_T_C;3_122491770_G_T;3_122486473_T_A;3_122479687_T_C;3_122477795_G_A;3_122476515_G_A;3_122474540_G_A;3_122474305_C_A;3_122473430_CC_TG;3_122473430_C_T;3_122471831_G_A;			0.301980198019802	3	-1	122458846	122512671
ENSG00000169169	ENSG00000169169	ILDDPSPACPHEEHLAALTAAPR	Q8TCG5-2	19_50167726_C_G	rs2304207	0.007155085706309514	5.055893934456272e-05	5.0	8.524324450807248e-09	-0.8169589368969841	3.3340674821732174e-05	-0.5251432670714196	3.562194361624589e-09	-0.6609488243924555	3.573479890547409e-12	-0.7507006960995779	False	50167726,50176187								0.14603960396039606	19	1	50194155	50216988
ENSG00000169288	ENSG00000169288	VAVFTENASEVK	Q9BYD6	4_78725120_T_C	rs11729215	0.08610092476224243	0.0005584145174241403	10.0	1.5552106296173924e-06	0.397764983603414	2.2708924269406847e-06	0.4012898463752588	1.034134073736066e-07	0.3178511330936852	3.859426922488312e-08	0.29456596624629	True	78725120,78643791,78647125,78674345,78678515,78680729,78681731,78682100,78682742,78687698,78695138,78706010,78710538,78715432,78716152,78722315,78724696,78726318,78734929,78735895,78736027,78738706								0.3292079207920792	4	1	78783674	78873944
ENSG00000169504	ENSG00000169504	FLDGNEMTLADCNLLPK	Q9Y696	1_25185197_T_C	rs4437822	0.0005826479945583942	6.86739589134879e-07	20.0	7.317675237083652e-11	-0.4400373183929221	5.685914552495978e-06	-0.35923170500531665	2.0286133009840256e-10	-0.6904121362657941	5.0692309989612624e-08	-0.345654450853851	False	25185197,25183636,25183976,25184269,25184292,25184480,25184718								0.2425742574257425	1	1	25071848	25170815
ENSG00000169599	ENSG00000169599	SVFFGPDFITVTK	Q9UMS0-3	2_69525721_A_G	rs7370877	1.277638038908665e-05	3.0321671778176206e-08	6.0	5.235448589554109e-10	0.605276411117649	1.196608598258507e-10	0.5675367793163799	0.0007695115233711752	0.3595038366253505	9.158136622840568e-05	0.32136450081890666	False	69525721,69527512,69528233,69528697,69529894,69530005,69530084,69531923,69532290,69532800,69538218,69541393,69544684,69547236,69548320,69548591,69549262,69550036,69550230,69550256,69550652,69551011,69551052,69552521,69553375,69558723,69558841,69561073,69562933,69567341,69567676,69567984,69568682,69571124,69573029,69573273,69575823,69576147,69577744,69578292,69578656,69579450,69579655,69580686,695…		2_69660217_GGTTGCAGTGAGCCGAGATC_G;2_69659912_T_TACC;2_69657349_CT_C;2_69652490_AT_A;2_69649746_AT_A;2_69635833_C_CAG;2_69630098_TTTCTC_T;2_69627008_AT_A;		2_69623136_A_G;	2_69661800_A_G;2_69660841_A_C;2_69660217_GGTTGCAGTGAGCCGAGATC_G;2_69660104_C_A;2_69659912_T_TACC;2_69657569_C_T;2_69657349_CT_C;2_69654386_A_G;2_69653341_C_A;2_69652490_AT_A;2_69652459_C_T;2_69649746_AT_A;2_69648520_C_T;2_69648324_A_G;2_69647241_A_G;2_69647119_G_A;2_69645765_C_A;2_69642970_G_T;2_69642572_T_C;2_69641524_G_C;2_69641366_A_G;2_69640536_G_T;2_69640378_T_C;2_69639612_A_G;2_69639047_T_C…	2_69641524_G_C;2_69641366_A_G;2_69640536_G_T;2_69640378_T_C;2_69639612_A_G;2_69639047_T_C;2_69638485_A_G;2_69635833_C_CAG;2_69634922_G_A;2_69634735_T_C;2_69633751_G_A;2_69633382_A_T;2_69632245_G_A;2_69631929_C_T;2_69630805_G_A;2_69630559_A_G;2_69630511_G_A;2_69630098_TTTCTC_T;2_69629553_A_G;2_69629145_A_C;2_69627919_G_A;2_69627008_AT_A;2_69625638_T_C;2_69625497_A_G;2_69625157_C_T;2_69625001_A_G;2…		0.4455445544554456	2	-1	69622882	69664760
ENSG00000169738	ENSG00000169738	TQADLDSLVR	Q7Z4W1	17_79992508_C_G	rs74512221	0.002099232745122034	5.9533105252353974e-06	10.0	4.649681441713849e-10	-0.7131054005978289	8.717081032587145e-14	-0.8722496942379104	1.6696188612062406e-29	-0.9965442011677158	0.0010479379766056294	-0.2662855820720419	False	79992508,79992511,79992815,79992855								0.1311881188118812	17	-1	79993012	79995608
ENSG00000169813	ENSG00000169813	TEMDWVLK	P52597	10_44043878_T_C		0.0130011649279155	2.669290646039219e-05	19.0	0.0008105885253553428	0.26924060772835884	0.6829605683281754	0.03864048505059437	0.9179425066455552	0.13077850295763674	0.17223663505405912	-0.10821809292712603	True	44043878,44032382,44037482,44040113,44041738,44041976,44042035,44042617,44042768,44042856,44043159,44043311,44043354,44043680,44044103,44044438,44045047,44045921,44046676,44046815,44048122,44048360,44049261,44049473,44049891,44051901,44052903,44053013,44053585,44053920,44054193,44054652,44056242,44056321,44057364,44057888,44058199,44058339,44058484,44059676,44059989,44060907,44061030,44062527,440…								0.4381188118811881	10	-1	43881065	43904614
ENSG00000169925	ENSG00000169925	NPMDMGTIK	Q15059	9_137176488_G_A	rs12682776	0.09472344827258093	0.0002936697896992784	22.0	8.843940379442345e-07	1.213267116035809	0.0221605354852176	0.3897052519806384	3.7244746711178585	0.07181515488773725	0.919486520663766	0.010149283293644708	False	137176488,137174922,137176672,137178009,137181023,137181225,137181703,137181823,137181957								0.08415841584158416	9	-1	136895427	136933657
ENSG00000170248	ENSG00000170248	AVQADGQVK	Q8WUM4	3_33840114_T_C	rs1141054	2.212378957557301e-09	2.2863359074912e-13	44.0	2.507314342245905e-17	0.5750261427925416	1.411709389346547e-17	0.638664226476342	6.565443310467703e-29	0.6415093039885968	2.4099552163400397e-44	1.0355927391268194	False	33840114,33838124,33839731,33840742,33841065,33841422,33842253,33843497,33843775,33844021,33844292,33844301,33845753,33846202,33846567,33846698,33847272,33847285,33847775,33848239,33848798,33849090,33849092,33849939,33850279,33851712,33852500,33853048,33853747,33854784,33856075,33856441,33857055,33857813,33858297,33858676,33859538,33859855,33860133,33860809,33860812,33861076,33861511,33862696,338…	3_33877626_G_A;	3_33910703_G_GATAAT;3_33907835_T_TCC;3_33902639_AT_A;3_33897964_TAGAG_T;3_33891843_GA_G;3_33889002_G_GGTT;3_33884916_CTTT_C;3_33881636_G_GATAAC;3_33879602_CTA_C;3_33866832_GGTAACTCCAATTTATCTTTTTGTTGCATGTGAAAAAAAGTGATAAGGCTTTTAAATTAAGAAAGTGATTAGAATATAATATGTTCAATGTCGAGCTGTCCTTCTTGAACTTGATACATGAATTATGGAAAATTTTCAGCTATCCTTTTCTGAATTTGTGGCACAAATTTACATTTAAGAATGTAGGCTGTGTTTGAAGTCATGAAATAGATCTTTAGTAATTGTCT…	3_33907835_T_C;3_33907835_T_TCC;3_33866832_GGTAACTCCAATTTATCTTTTTGTTGCATGTGAAAAAAAGTGATAAGGCTTTTAAATTAAGAAAGTGATTAGAATATAATATGTTCAATGTCGAGCTGTCCTTCTTGAACTTGATACATGAATTATGGAAAATTTTCAGCTATCCTTTTCTGAATTTGTGGCACAAATTTACATTTAAGAATGTAGGCTGTGTTTGAAGTCATGAAATAGATCTTTAGTAATTGTCTTTAAACACTCCATTCTGGAATAGTATTTATGTATGTTTTTAACATGTCAGACATTTATTCGCAAATATTTATTGGATACTTACTCTGTGCCAGTCACTGTTCTAGTTTCTAGATAAACGGAGTTAGAAA…	3_33910703_G_GATAAT;3_33909611_C_T;3_33909048_G_C;3_33877626_G_A;3_33840114_T_C;	3_33907835_T_C;3_33907835_T_TCC;3_33907333_G_C;3_33905781_A_G;3_33904933_T_C;3_33904548_G_A;3_33902722_C_T;3_33902639_AT_A;3_33902354_G_A;3_33902079_T_G;3_33901949_G_A;3_33901302_C_T;3_33900980_G_A;3_33900679_A_G;3_33900651_A_G;3_33899154_A_G;3_33898032_T_C;3_33897964_TAGAG_T;3_33897898_A_G;3_33897496_C_T;3_33897341_G_A;3_33896393_G_A;3_33894609_G_A;3_33893054_A_C;3_33892770_G_A;3_33892372_C_G;3_…	3_33884916_CTTT_C;3_33884847_A_G;3_33884691_T_C;3_33884157_T_A;3_33882606_G_A;3_33882544_G_A;3_33882134_G_T;3_33881636_G_GATAAC;3_33881433_G_C;3_33881340_G_A;3_33880574_C_T;3_33879602_CTA_C;3_33879498_G_A;3_33878586_A_G;3_33878402_T_A;3_33877626_G_A;3_33876310_G_A;3_33873291_G_C;3_33872984_A_G;3_33872787_G_C;3_33872720_C_T;3_33871672_G_C;3_33869679_A_G;3_33866929_G_T;3_33866832_GGTAACTCCAATTTATCT…	3_33907945_A_G;3_33895391_A_G;	0.2945544554455445	3	1	33839844	33911194
ENSG00000170291	ENSG00000170291	LPCTTLCQVLHAV	Q8TE02	17_7184481_T_C	rs5415	0.0058854628466081535	4.0647695151361e-05	5.0	1.384083777788397e-08	0.6988974059055666	1.515267668263465e-07	0.517040723011039	6.0095888717607715e-31	1.2270812985754955	1.1776090120934524e-15	-0.4229586709252738	True	7184481,7177872								0.37376237623762376	17	1	7154735	7163259
ENSG00000170322	ENSG00000170322	IQTVPASHLQQGTASGSSK	Q6P4R8-3	11_129626099_C_G	rs10431095	4.2602664822556656e-05	2.9410626390513235e-08	26.0	0.0012187597111542078	0.2940614458613382	0.0018973902422973394	0.3124255199825631	0.17004093390855787	0.2227989059072783	0.004878423815249026	0.2448530183813186	True	129626099								0.2153465346534653	11	-1	129733531	129765485
ENSG00000170430	ENSG00000170430	PGLGGSSGLAGAWLK	P16455	10_131567549_C_T		8.712056290439729e-06	1.6381924339704442e-08	7.0	1.990685900791806e-10	-1.0371417692388054	0.0027916423414907	0.3619467503904721	0.09357600927034923	0.07714941185502132	0.2940531225820952	0.10574460317546967	False	131567549,131539683,131544516,131546541,131547178,131548233,131551168,131553953,131555074,131555087,131562193,131563828,131565064,131565170,131567067,131568828,131569683,131571303,131572206	10_131565170_A_G;10_131565064_A_G;				10_131563828_G_C;10_131562193_A_G;10_131555087_A_T;10_131555074_A_C;10_131553953_C_T;10_131551168_T_C;10_131548233_C_T;10_131547178_T_G;10_131546541_G_C;10_131544516_A_C;10_131539683_G_A;			0.16831683168316833	10	1	131265448	131566271
ENSG00000171103	ENSG00000171103	ERPFQAGELILAETGEGETK	Q9BVS5	2_29044280_C_G	rs62131971	2.0866701128412398e-05	3.9983601324690934e-08	8.0	7.884153359076323e-14	-0.6191509376485608	2.7403806948081405e-14	-0.6763228027333847	4.810321594090638e-16	-0.527556296518776	1.0237562301330859e-17	-0.653392323190302	False	29044280,28980900,28985150,28986568,28989887,28989946,28992293,28995226,29000287,29003787,29004046,29004299,29005870,29007855,29009049,29010517,29011141,29011337,29014746,29015982,29016019,29016262,29017358,29017474,29023749,29026361,29032238,29032478,29032673,29032746,29041877,29044437,29046185,29046908,29052283,29055916,29066756,29068457,29068882,29069551,29070805,29075031,29080107,29083075,290…					2_29088338_T_G;2_29088256_A_G;2_29087799_C_A;2_29087274_T_C;2_29083850_C_A;2_29083075_T_C;2_29075031_C_T;	2_29088338_T_G;2_29088256_A_G;2_29087799_C_A;2_29087274_T_C;2_29083850_C_A;2_29083075_T_C;2_29075031_C_T;		0.4900990099009901	2	-1	29072687	29093167
ENSG00000171219	ENSG00000171219	TPVLCVAVK	Q6DT37	11_64658399_G_C	rs7949144	0.0908434711374618	0.000378423876866446	16.0	3.252582197805089e-08	-1.7239831604199685	0.8612376905373176	0.0251657676379562	1.6959433992189017	-0.13780062327225706	0.7585986361502494	0.03030520153561681	False	64658399								0.056930693069306926	11	-1	64590859	64612041
ENSG00000171298	ENSG00000171298	AGYIIPLQGPGLTTTESR	P10253	17_78076592_A_C	rs12450199	1.1688596761267146e-05	7.792531046503677e-09	21.0	3.908598984927492e-13	-0.5853024540481786	1.5763692852072947e-11	-0.5417199384346558	1.907064217760708e-18	-0.6759476087909463	4.386910964420164e-19	-0.674357537838423	False	78076592,78096483					17_78076592_A_C;			0.35396039603960394	17	1	78075355	78093678
ENSG00000171497	ENSG00000171497	EGDDGGIFPK	Q08752	4_159621726_A_G		1.940675619560236e-06	9.591760297705249e-10	23.0	2.5055608530856e-14	-1.3072666392244354	2.552200387288958e-13	-1.2443310314954026	0.001703634752246652	-0.6887801878842231	0.06528721493614333	0.3042118888562505	False	159621726,159621724								0.056930693069306926	4	-1	159630286	159644548
ENSG00000171503	ENSG00000171503	LQINAQNCVHCK	Q16134	4_159544076_G_T	rs12505765	0.01721910852229443	4.391315668079455e-05	16.0	2.2130600834708566e-07	0.6604768528573658	2.273426846724732e-09	0.9082376637003594	1.5121284951172407e-08	0.499015602893281	0.0010137165080359454	0.4353497902325392	False	159544076,159447731,159450239,159452312,159454279,159454782,159456361,159457028,159458168,159458251,159458600,159459277,159459991,159460722,159463232,159463995,159464123,159464305,159464732,159465588,159465707,159468949,159469042,159469045,159471283,159471603,159472690,159473323,159480698,159481490,159483404,159490434,159491240,159492679,159492791,159496056,159500361,159500484,159500966,159503611…	4_159601676_C_T;				4_159612318_T_C;4_159609824_C_G;4_159601676_C_T;			0.12376237623762375	4	1	159593277	159630775
ENSG00000171766	ENSG00000171766	FVTTEFEPCFDAADFIR	P50440-2	15_45740392_G_A	rs9806699	0.03875124932955548	0.00012767154060952028	15.0	3.6551666391579225e-07	0.4965834524361985	9.83656728263874e-07	0.5151238758030163	1.4610313057790038e-10	0.6159457315358945	6.868170429308123e-14	0.6708352923584041	False	45740392,45720597,45722165,45729123,45730926								0.2896039603960396	15	-1	45653322	45694525
ENSG00000171806	ENSG00000171806	VLDLGCGSGLLGITAFK	O95568	1_169758564_A_G	rs12132222	2.384688501613977e-05	5.503221383577273e-08	7.0	4.542452598394777e-13	-1.217240681030724	1.7450263952648282e-12	-1.0543675922797406	2.070898681876936e-20	-1.3962987587084412	2.5006540052853675e-30	-1.6137877134372178	False	169758564,169668608,169668856,169669143,169670940,169670941,169671217,169671237,169671277,169671386,169671788,169672867,169674403,169674561,169674983,169675349,169678333,169680074,169681908,169682512,169683044,169683133,169683576,169684341,169685196,169685222,169689016,169689800,169689832,169691221,169692121,169692713,169694720,169696033,169696754,169697076,169697166,169698789,169700062,169700077…				1_169763814_A_G;1_169763807_G_C;	1_169763814_A_G;1_169763807_G_C;			0.09405940594059406	1	-1	169761670	169764107
ENSG00000172007	ENSG00000172007	IIVIGDSNVGK	Q9H082	4_140183440_T_C	rs6826480	0.00012799619178864184	4.993030815256341e-07	5.0	7.631547584914658e-10	-0.6106183592709379	4.0120655105514313e-13	-0.6176278890323403	6.544516864990602e-17	-0.7111657972952289	6.727773132335304e-17	-0.7701622405528642	False	140183440,140170280,140170960,140171574,140173082,140175107,140175923,140176471,140178704,140178964,140179888,140185798,140185818,140186178,140189306,140189613,140191273,140191910,140192537,140193292,140195872,140199109								0.25	4	1	140374386	140397763
ENSG00000172171	ENSG00000172171	QFLFDSILK	Q96QE5	17_29151024_T_C	rs56325146	0.0956970729059547	0.0004366696637725346	15.0	1.4136310313947882e-06	-0.7433149327756428	0.34210398165498884	-0.1249533533355085	2.5290298441348406e-08	-0.6697712964518597	7.183133194433249e-05	-0.3619834520457103	False	29151024,28903418,28905254,28906994,28914153,28917126,28922335,28922900,28926362,28927884,28931197,28931871,28933576,28933718,28934853,28936089,28936747,28939401,28949444,28951513,28959179,28959568,28959743,28959917,28962472,28965981,28968150,28969013,28974565,28981684,28987932,28990047,28990145,28993236,29000165,29003789,29003806,29003939,29004134,29004218,29005971,29005998,29007056,29008167,290…	17_29226228_T_C;	17_29229968_GGC_G;17_29229766_C_CTG;17_29229297_ATATCT_A;		17_29233763_A_G;17_29233344_C_T;17_29226228_T_C;	17_29232625_G_A;17_29232533_C_T;17_29232066_G_A;17_29229968_GGC_G;17_29229766_C_CTG;17_29229424_C_G;17_29229361_A_C;17_29229297_ATATCT_A;17_29228561_A_G;17_29227765_G_A;17_29227697_A_G;	17_29232625_G_A;17_29232533_C_T;17_29232066_G_A;17_29229968_GGC_G;17_29229766_C_CTG;17_29229424_C_G;17_29229361_A_C;17_29229297_ATATCT_A;17_29228561_A_G;17_29227765_G_A;17_29227697_A_G;17_29226228_T_C;		0.12128712871287127	17	-1	29224354	29233838
ENSG00000172687	ENSG00000172687	NLLEYSYFEK	E9PE46	19_21513408_G_A	rs608002	8.129036891917746e-08	6.128147950111499e-10	1.0	7.170811493056963e-18	1.0397550992093263	2.755102479066661e-16	0.9385160675005338	1.0824442830549095e-44	1.4413599236524175	4.682835896337499e-25	0.8450025829557649	False	21513408,21464209,21464322,21468316,21468680,21468681,21470834,21472860,21473528,21474173,21477379,21478858,21479563,21479783,21482947,21483248,21487372,21488964,21489677,21491951,21492504,21492971,21494497,21496591,21503939,21506719,21506962,21511784,21515681,21517720,21519220,21521757,21522301,21522777,21523953,21523986,21524402,21525143,21525225,21525226,21525302,21525314,21525390,21525610,215…		19_21561508_TCTC_T;		19_21561508_TCTC_T;	19_21558536_A_G;19_21557182_G_A;19_21556754_G_A;19_21556721_A_C;19_21550330_T_C;19_21549636_C_T;19_21547129_T_C;19_21545841_T_C;			0.2079207920792079	19	1	21541732	21562104
ENSG00000172757	ENSG00000172757	SSTPEEVK	E9PK25	11_65498872_C_T	rs112490887	0.07584709943414687	0.0002961004689528589	16.0	9.079554753165815e-07	-0.3836018643076447	0.16601022637217264	-0.1150157886780958	0.02566487739074973	-0.4494054160599632	0.8658299240490436	0.00788504402019565	False	65498872,65570517								0.14108910891089108	11	-1	65590493	65629497
ENSG00000172785	ENSG00000172785	SINGLGQILETQR	Q9BRT8	9_185632_C_A	rs2992854	1.4270681694810006e-10	3.659211703142791e-14	14.0	2.50148096035368e-21	-0.8275753476743501	3.0925163186236178e-24	-0.8369060611268249	1.267969437741147e-32	-1.1085776540028838	1.0087489647616268e-42	-1.0138701269106538	False	185632,174812,186620					9_186620_A_T;9_174812_C_A;9_185632_C_A;			0.4628712871287129	9	-1	121041	188979
ENSG00000173226	ENSG00000173226	EALIAQISTNVEQLMK	Q15051	3_121340536_T_C	rs4676684	2.069293498148149e-05	1.8498073067651282e-08	17.0	4.389637126183594e-13	-0.6983710495068539	6.639696171850915e-14	-0.8191780556073794	0.012421431151922529	-0.15791982489952186	0.0008043659130634296	0.3273310476377838	True	121340536,121339520,121342819,121343534,121345874,121347101,121347408,121347927,121348499,121350304,121351750,121353254,121353888,121354381,121354925,121355102,121355723,121356368,121358697,121364487,121371063,121372875,121373111,121376863,121378287,121392196,121397997,121398425,121406253,121418016,121420786,121423495,121432535,121433926,121434839,121435621,121435624,121440339,121443754,121451224…	3_121500699_C_T;	3_121528792_G_GA;3_121528792_GA_G;3_121524218_TCAAAG_T;		3_121500699_C_T;	3_121553719_G_A;3_121552228_T_G;3_121536800_G_A;3_121532559_A_G;3_121529095_G_A;3_121528792_G_GA;3_121528792_GA_G;3_121526849_T_C;3_121524218_TCAAAG_T;3_121513185_T_C;3_121506321_C_T;3_121505464_T_A;3_121503904_T_C;3_121497910_G_A;3_121497849_T_A;3_121493856_T_C;3_121493021_T_C;3_121492195_A_G;3_121491951_C_T;3_121491891_C_T;3_121491112_G_C;3_121490818_C_T;3_121490416_C_T;3_121490006_C_A;	3_121553719_G_A;3_121552228_T_G;3_121536800_G_A;3_121532559_A_G;3_121529095_G_A;3_121528792_G_GA;3_121528792_GA_G;3_121526849_T_C;3_121524218_TCAAAG_T;3_121513185_T_C;3_121506321_C_T;3_121505464_T_A;3_121503904_T_C;3_121500699_C_T;3_121497910_G_A;3_121497849_T_A;3_121493856_T_C;3_121493021_T_C;3_121492195_A_G;3_121491951_C_T;3_121491891_C_T;3_121491112_G_C;3_121490818_C_T;3_121490416_C_T;3_121490…		0.2821782178217821	3	-1	121488610	121553926
ENSG00000173272	ENSG00000173272	GSAALGGVLALAER	Q6P582	2_132231411_C_T	rs149640164	4.223072842557861e-07	1.4149340623623324e-09	3.0	6.438369876697494e-16	-1.2592776647099129	0.00017349677281715528	-0.5992291660757211	3.0391435828425516e-29	-1.4475647751323593	3.784966741242022e-20	-1.0881663959120729	False	132231411,132231378,132231425					2_132231378_G_C;2_132231411_C_T;	2_132231378_G_C;2_132231411_C_T;		0.0891089108910891	2	-1	132222473	132250316
ENSG00000173545	ENSG00000173545	GLGVDSVDK	Q969S3	5_16401107_T_C	rs339387	0.06095885617173339	0.00018641108477920944	18.0	7.385478556842848e-07	-0.5384042041835322	0.0018326546928241808	-0.27804108668305205	0.6081284549913204	-0.03816016193466552	0.5080449592599795	-0.04298159161232084	False	16401107,16367855,16368806,16373335,16375834,16381553,16386613,16389379,16390793,16391881,16393546,16399841,16400369,16401976								0.2004950495049505	5	-1	16451628	16465901
ENSG00000173757	ENSG00000173757	KLQQTQEYFIIQYQESLR	P51692	17_40114587_G_A	rs9899099	0.09731858814132682	0.00021675020499540884	31.0	2.573649902878228e-07	-1.1391723070887103	0.6048801750286963	0.06792256296970489	1.1075617075094568	-0.20656542646890466	0.5737052304618117	-0.05960931804178622	True	40114587,39984746,40037896,40049694,40077754								0.09158415841584157	17	-1	40351186	40428725
ENSG00000174080	ENSG00000174080	SDVPFWAIK	Q9UBX1	11_66340968_A_G	rs3018318	0.09455592907776628	0.0015981841548683125	4.0	1.1127138596409764e-05	0.5942030314037257	0.0005650168882045677	0.4111288090520296	1.0806901989133856e-06	0.4616302329730204	2.3119553654104456e-05	0.39802141335767066	False	66340968,66324360,66324583,66324762,66325830,66326362,66327673,66328095,66328494,66328719,66329732,66331458,66333598,66335548,66336989,66337987,66338118,66339810,66341005,66341177,66341451,66342691,66483265	11_66333598_C_A;			11_66335548_A_G;		11_66333598_C_A;	11_66335548_A_G;11_66333598_C_A;11_66331458_A_G;	0.4950495049504951	11	-1	66330934	66336312
ENSG00000174373	ENSG00000174373	DGLSLQFK	A0A1B0GUI1	14_35901490_C_T	rs8008008	0.005038024874020805	4.9872209855199585e-06	33.0	1.0700156442357863e-07	-1.2608143393164577	0.4759412849634373	-0.0868086039989624	1.1857638268966015	-0.12920092280032072	0.3337206190890103	0.06531811036980655	False	35901490,35894030,35901561,35901582,35911045,35967580								0.16336633663366334	14	-1	36007558	36278510
ENSG00000175198	ENSG00000175198	AMGEQAVALAR	P05165	13_100566113_G_A	rs4772253	0.020898515666694702	2.675012430277369e-05	33.0	4.86551300236324e-09	-0.6459575037566762	0.08050596721473065	-0.13308820626682216	0.9897103369594722	-0.12517056582962374	0.4625352152708532	-0.05936532857831767	False	100566113,100564082,100564508,100572880								0.4727722772277228	13	1	100741269	101182686
ENSG00000175216	ENSG00000175216	AGLAADKK	Q14008	11_46932320_G_A	rs35959877	0.0806070548924716	5.17347051318527e-05	99.0	1.1310307135020892e-10	-1.885107133476408	0.467952800139681	0.12970742692234485	0.488364268061294	-0.28842596536408066	0.22430915917872096	0.07800545189135118	True	46932320								0.06435643564356436	11	-1	46764598	46867847
ENSG00000175575	ENSG00000175575	SITCLDISSR	Q9BRP4	11_73633779_G_A	rs60863026	2.2201631303715633e-05	2.355563769609652e-08	15.0	5.166111879710156e-13	-1.1675180036072863	2.269012050256512e-12	-1.0841060930481683	3.516320492865248e-11	-1.063732833119014	5.062214305643469e-14	-1.0657473689707542	False	73633779,73611349,73615599,73636213,73664450	11_73611349_G_C;		11_73611349_G_C;		11_73636213_A_C;11_73615599_G_A;11_73611349_G_C;11_73633779_G_A;			0.07920792079207921	11	1	73587744	73638790
ENSG00000175634	ENSG00000175634	LALPPYLTPDAR	Q9UBS0	11_67200812_C_T	rs55987642	0.06482445560427033	0.0004576573986660224	8.0	2.0282012565321465e-07	-1.2105480755229747	2.5579497755013786e-08	-1.0001120872181557	0.05146277737998319	-0.4830362844734276	0.005241726625533134	-0.3213871580657915	False	67200812,67224391	11_67200812_C_T;		11_67200812_C_T;	11_67200812_C_T;		11_67200812_C_T;		0.08168316831683169	11	1	67195931	67202872
ENSG00000176393	ENSG00000176393	ETFASTASQLHSNVVNYVQQIVAPK	Q9H4A4	1_201968263_T_C	rs28419585	2.7655052239389106e-05	1.4270960007462668e-08	32.0	0.0006223645438732367	-0.2783243474714068	0.0015138960407504016	-0.2732973536827421	0.0007387927296210821	-0.4339808309552001	0.006917675118428347	-0.2998774189428081	False	201968263,201965855,201966295,201967669,201970986,201971348,201971862,201972889,201973565,201975169,201976201	1_201973565_G_A;	1_201975169_TTCTG_T;1_201966295_TG_T;		1_201975169_TTCTG_T;	1_201972889_C_T;1_201971862_C_T;1_201971348_A_G;1_201967669_C_T;1_201966295_TG_T;1_201965855_C_T;1_201968263_T_C;			0.2301980198019802	1	1	201951500	201975275
ENSG00000176595	ENSG00000176595	ATDAVGPQLSLANCYEVLSAAK	O94819	8_1947719_A_G	rs11986732	0.004142736699385253	3.2593626658439676e-05	4.0	1.1285699781766453e-07	0.8448819421214422	0.5750156745357247	0.06361130313166696	0.5566883571675922	-0.029735150994136438	0.5923754972162916	-0.030585054994791826	False	1947719,1944336,1944494,1944794,1946980,1948888,1948916,1949206		8_1949206_CACA_C;		8_1949206_CACA_C;8_1948916_A_G;8_1948888_G_A;	8_1946980_C_T;8_1944794_G_A;8_1944494_G_A;8_1944336_G_A;8_1947719_A_G;			0.4504950495049505	8	1	1922044	1955102
ENSG00000176623	ENSG00000176623	AEQVDPNFYSK	Q96DB5	8_87400459_G_A	rs6471314	4.020288458973533e-09	1.949648230064266e-12	12.0	3.234218241236046e-14	0.8283543539175593	7.328465458111786e-15	0.9117283698508298	3.076873657652567e-45	0.9182395120793176	0.00039814639765424725	0.3684147684676261	False	87400459,87245253,87246118,87247063,87247209,87247659,87247678,87247714,87247845,87247944,87248954,87249294,87249417,87250309,87250668,87250984,87251833,87251914,87252666,87253048,87253929,87254730,87255203,87255599,87259177,87259355,87259920,87260559,87266060,87266239,87268379,87270792,87271956,87274852,87287445,87293089,87293600,87299919,87301237,87302328,87302745,87304281,87306440,87310108,873…	8_87484669_C_T;	8_87524953_A_AGTAGGCAATCAGGAT;8_87523217_GTT_G;8_87513942_C_CAAG;8_87512759_TA_T;8_87510871_GTAGTGGT_G;8_87505796_CATG_C;8_87500209_CAT_C;8_87489562_AAC_A;8_87489561_AAAC_A;		8_87520894_C_A;8_87497176_G_A;8_87486168_T_C;8_87484913_G_A;8_87484669_C_T;8_87480890_C_T;	8_87526439_A_C;8_87524953_A_AGTAGGCAATCAGGAT;8_87524953_A_T;8_87524094_G_T;8_87523430_A_G;8_87523217_GTT_G;8_87521481_C_T;8_87521212_C_T;8_87520894_C_A;8_87517700_C_G;8_87517679_C_T;8_87515514_G_C;8_87515156_C_T;8_87515046_C_T;8_87514247_T_C;8_87513942_C_G;8_87513942_C_CAAG;8_87513469_T_C;8_87513216_A_G;8_87513034_A_G;8_87512759_TA_T;8_87512436_T_C;8_87511685_C_T;8_87510871_GTAGTGGT_G;8_87510871_…	8_87526439_A_C;8_87524953_A_AGTAGGCAATCAGGAT;8_87524953_A_T;8_87524094_G_T;8_87523430_A_G;8_87523217_GTT_G;8_87521481_C_T;8_87521212_C_T;8_87520894_C_A;8_87517700_C_G;8_87517679_C_T;8_87515514_G_C;8_87515156_C_T;8_87515046_C_T;8_87514247_T_C;8_87513942_C_G;8_87513942_C_CAAG;8_87513469_T_C;8_87513216_A_G;8_87513034_A_G;8_87512759_TA_T;8_87512436_T_C;8_87511685_C_T;8_87510871_GTAGTGGT_G;8_87510871_…	8_87497176_G_A;	0.20297029702970296	8	-1	87480486	87526586
ENSG00000176974	ENSG00000176974	YYGGTEFIDELETLCQK	P34896-2	17_18265467_C_T	rs2461837	0.003709091630367751	7.574707489722342e-06	15.0	3.3595352703651303e-09	0.4052016378036143	3.472612983627005e-09	0.4803885314461018	2.327135470137949e-28	0.7652955802467133	0.0730044108506461	0.15646667718690851	False	18265467,18171926,18173934,18173980,18174681,18178012,18180291,18181794,18184011,18185599,18186475,18187556,18189625,18189957,18191183,18192195,18192393,18192652,18192871,18192954,18193941,18195268,18195287,18197888,18199062,18199388,18202409,18202678,18205750,18208544,18208969,18209008,18211205,18215080,18215586,18215858,18216013,18216745,18217186,18218164,18218900,18220674,18221134,18222341,182…	17_18232096_G_A;	17_18253325_ACT_A;17_18240394_CATCT_C;		17_18266567_G_A;17_18232096_G_A;17_18232017_G_C;17_18231998_G_A;17_18231797_T_C;	17_18266567_G_A;17_18265264_G_A;17_18260753_C_G;17_18260488_G_A;17_18254110_G_A;17_18253325_ACT_A;17_18253274_C_T;17_18247362_C_T;17_18247280_C_T;17_18242897_C_T;17_18241638_A_G;17_18240394_CATCT_C;17_18239896_G_A;17_18239012_G_A;17_18233810_T_C;17_18233631_G_A;17_18265467_C_T;	17_18266567_G_A;17_18265264_G_A;17_18260753_C_G;17_18260488_G_A;17_18254110_G_A;17_18253325_ACT_A;17_18253274_C_T;17_18247362_C_T;17_18247280_C_T;17_18242897_C_T;17_18241638_A_G;17_18240394_CATCT_C;17_18239896_G_A;17_18239012_G_A;17_18233810_T_C;17_18233631_G_A;17_18232096_G_A;17_18232017_G_C;17_18231998_G_A;17_18231797_T_C;17_18265467_C_T;		0.2920792079207921	17	-1	18231187	18266856
ENSG00000177058	ENSG00000177058	LQSYTEGYGK	E7ESU6	5_54912754_C_T	rs2897833	0.09000112462083533	0.0029885499679647965	2.0	1.0257153667815038e-05	-0.4043642016449411	6.268033393923522e-07	-0.4534392628745904	0.5775956275189841	-0.17656969631147895	3.780296086237535e-09	-0.3759225644837463	False	54912754,54881863,54882305,54885708,54886322,54887909,54889087,54889419,54890359,54890957,54891954,54892034,54893029,54893547,54894233,54894698,54894808,54895204,54896813,54898884,54899323,54900772,54900965,54902629,54904057,54904394,54904414,54904462,54904574,54904720,54904750,54904805,54904839,54906840,54913703,54915152,54916727,54917940,54918908,54919229,54919614,54920545,54923243,54925291,549…	5_54960673_C_G;	5_54999030_TA_T;5_54998090_A_AT;5_54998090_AT_A;5_54995934_CG_C;5_54995552_GA_G;5_54994771_T_TCAAA;5_54994083_GA_G;5_54989205_A_AAT;5_54986582_T_TTTACTAGAT;5_54984815_AAGC_A;5_54984814_AAAGC_A;5_54984534_ATTT_A;5_54982464_TG_T;5_54982249_C_CTTCTT;5_54977989_AGGAAAATAG_A;5_54976497_C_CT;5_54974970_TATA_T;5_54974920_A_AGATT;5_54973751_T_TTA;5_54973552_TG_T;5_54968742_CT_C;5_54967017_TTA_T;5_5496602…		5_55008321_G_C;5_54998622_G_A;5_54990005_C_T;5_54989205_A_AAT;5_54988582_A_G;5_54969273_T_C;5_54960687_C_T;5_54960673_C_G;5_54960609_A_G;	5_55007841_C_A;5_55007837_C_T;5_55005408_C_T;5_55005186_T_C;5_55002004_C_G;5_55000564_T_G;5_55000356_A_G;5_55000319_A_C;5_54999853_A_C;5_54999170_T_C;5_54999030_TA_T;5_54999000_T_G;5_54998622_G_A;5_54998504_C_T;5_54998090_A_AT;5_54998090_AT_A;5_54997331_C_G;5_54997283_C_T;5_54997223_C_T;5_54997040_C_T;5_54996683_G_C;5_54996050_T_C;5_54996012_C_T;5_54995934_CG_C;5_54995552_GA_G;5_54995430_C_T;5_54…	5_55007841_C_A;5_55007837_C_T;5_55005408_C_T;5_55005186_T_C;5_55002004_C_G;5_55000564_T_G;5_55000356_A_G;5_55000319_A_C;5_54999853_A_C;5_54999170_T_C;5_54999030_TA_T;5_54999000_T_G;5_54998622_G_A;5_54998504_C_T;5_54998090_A_AT;5_54998090_AT_A;5_54997331_C_G;5_54997283_C_T;5_54997223_C_T;5_54997040_C_T;5_54996683_G_C;5_54996050_T_C;5_54996012_C_T;5_54995934_CG_C;5_54995552_GA_G;5_54995430_C_T;5_54…	5_54960687_C_T;5_54960609_A_G;	0.32673267326732675	5	-1	54921673	55069022
ENSG00000177082	ENSG00000177082	DLCHPVSSVQCPVSVPSPDPELLR	Q6P4I2	15_85151589_T_C	rs7181779	0.08958072332359493	0.0006598290285093214	9.0	1.8788379564456024e-06	0.5685532208330071	0.0019220678669928906	0.32150697582773624	0.00023125965759267643	0.4363170574033229	0.17081719953572475	0.0624054674607381	False	85151589,85143490,85149771,85151625,85153179,85159397,85159995								0.1905940594059406	15	-1	85185999	85197574
ENSG00000177565	ENSG00000177565	GNFILSAGVDK	Q9BZK7	3_176621934_T_C	rs7640627	0.00020473559655339568	2.858181117374197e-07	15.0	0.0014034304073523725	-0.380589608543054	0.8502584114370157	-0.022763799205971352	0.07973420127393477	-0.24008874735721736	0.0013441372762383688	-0.2026174417807363	True	176621934,176621874								0.13366336633663367	3	-1	176737143	176915261
ENSG00000177731	ENSG00000177731	GVDLSGNDFK	Q13045-2	17_18104433_G_A	rs78730854	0.029642350706625693	2.653435264973029e-05	52.0	6.22170517366668e-09	-1.0078825513711085	0.048914768768892274	-0.6073286217326124	0.7505326995905123	-0.3479128430116061	0.009135539057522835	-0.16225591351525434	False	18104433								0.09653465346534654	17	-1	18148150	18162230
ENSG00000177830	ENSG00000177830	NQHFDGFVVEVWNQLLSQK	Q9BWS9	11_749776_C_T	rs11246300	0.014372691251029732	4.090758975873861e-05	14.0	4.8899460182063e-07	-0.6772271542741646	0.03074178300212708	-0.21796766116254274	0.03485273007004066	-0.3868324616604228	0.4109199899252073	0.05433969563448881	False	749776,744759								0.15346534653465346	11	-1	867357	915058
ENSG00000178209	ENSG00000178209	LFNAIIHR	Q15149	8_145005561_T_C		0.05409185288675456	1.197032176365341e-05	239.0	5.9961293527290445e-09	-0.4336111365449421	1.5289330936777756e-09	-0.5162538112908037	5.187865480133798e-16	-0.5106444459136921	7.905498413184885e-17	-0.37959298810545816	False	145005561,145005559		8_145005559_G_GC;			8_145005559_G_C;8_145005559_G_GC;8_145005561_T_C;			0.452970297029703	8	-1	144989321	145050902
ENSG00000178802	ENSG00000178802	DTFNGNLPFLFK	P34949	15_75208146_C_T	rs12908365	5.529544358323699e-05	8.491382784709921e-08	12.0	5.669565914187818e-10	0.4168875250932862	1.6267865543747042e-10	0.4133265172985912	1.3659509883487085e-09	0.5652848876948792	9.976989990867267e-14	0.5524411313640626	False	75208146,75139426,75155662,75155896,75157582,75157721,75159433,75160998,75164530,75165751,75166335,75170082,75173925,75175457,75176097,75183935,75184084,75184458,75186376,75186504,75189930,75192222,75193004,75196176,75199892,75201601,75202205,75204026,75206970,75207872,75208549,75209350,75209557,75212225,75212357,75217686,75218840,75220968,75221015,75221245,75221865,75222752,75223127,75225808,752…		15_75186504_AGCCTCT_A;15_75186376_GTTCA_G;		15_75189930_A_G;	15_75186504_AGCCTCT_A;15_75186376_GTTCA_G;15_75184458_G_C;15_75184084_T_G;15_75183935_G_A;	15_75186504_AGCCTCT_A;15_75186376_GTTCA_G;15_75184458_G_C;15_75184084_T_G;15_75183935_G_A;	15_75189930_A_G;	0.457920792079208	15	1	75182346	75191798
ENSG00000179163	ENSG00000179163	DGLIVPIFQER	P04066	1_24175763_A_G	rs12404321	0.056124895056183864	0.0003752517065052379	8.0	2.486215644154562e-07	0.9163777830235608	8.786226613476755e-09	0.6322643021580698	3.2110641053568564e-19	1.3071617455417135	5.097200390068037e-20	1.3901731752721092	False	24175763,24072355,24099335,24105533,24106510,24107208,24117835,24118520,24121601,24128467,24134462,24134721,24143932,24160777,24176983,24178590,24180554,24183981,24185648,24186934,24187738,24190106,24190577,24191219,24192379,24192453,24193741,24193826,24193875,24193965,24194011,24194748,24194773,24194788,24194862,24194898,24195131,24195249,24195270,24195523,24195666,24201162	1_24194773_G_A;1_24194748_G_C;	1_24180554_GAATA_G;			1_24194011_G_A;1_24193965_T_C;1_24193875_T_C;1_24193826_C_T;1_24193741_T_C;1_24192453_T_C;1_24192379_G_C;1_24191219_G_T;1_24190106_C_G;1_24187738_G_A;1_24186934_T_C;1_24185648_A_C;1_24183981_G_A;1_24180554_GAATA_G;1_24178590_T_A;1_24176983_T_A;1_24175763_A_G;			0.09405940594059406	1	-1	24171567	24194784
ENSG00000179750	ENSG00000179750	FLDLVPSLQLDPAQIYR	Q9UH17	22_39358037_A_C	rs12628403	0.0002044670901433508	3.0408446028943273e-07	14.0	1.2815311867674641e-10	-1.3253161318986542	7.756670339192813e-06	-0.8829385619624006	2.5621550786512303e-13	-1.5840729980915895	1.1395588059120979e-12	-1.5459640529564358	False	39358037								0.04207920792079208	22	1	39378352	39388809
ENSG00000180185	ENSG00000180185	SFTASCPVSAFVPK	Q6P587	16_1848748_T_C	rs6600166	0.001635381024290442	5.626086448288885e-06	8.0	4.55242337144392e-10	-0.7531998548971922	4.4510411545865095e-11	-0.7924997184871361	2.8750138705210304e-24	-0.8835144502117934	1.613435874735615e-25	-1.0115112580259735	False	1848748,1848984,1849633,1851148,1852775,1853013,1858385,1858805,1858808,1859638,1860431,1860805,1861916,1862089,1862983,1863104,1863640,1864817,1865094,1866102,1866362,1868554,1868647,1871329,1874146,1876216,1876992,1877175,1877494,1877558,1878031,1878032,1878067,1878492,1878521,1878597,1878641,1878740,1878801,1878852,1878924,1878977,1879293,1879422,1879592,1879662,1879780,1879960,1880149,1880213…	16_1877558_G_A;	16_1887887_ATA_A;16_1887887_AT_A;16_1887886_AAT_A;16_1887886_AAT_A;16_1886164_G_GTTATT;16_1882971_C_CAA;16_1882762_TCTCTC_T;16_1882761_TTC_T;16_1876992_A_AGCG;		16_1890056_T_G;16_1889907_G_A;16_1889821_C_A;16_1889645_C_T;16_1889616_C_A;16_1878852_T_C;16_1878801_G_T;16_1878740_A_G;16_1878641_A_C;16_1878597_T_C;16_1878521_C_G;16_1878492_G_A;16_1878067_C_G;16_1878032_C_T;16_1878031_G_A;16_1877175_G_A;16_1876992_A_AGCG;	16_1889189_A_G;16_1889009_A_G;16_1889002_C_T;16_1888980_A_G;16_1888954_A_C;16_1888789_C_T;16_1888684_A_G;16_1888486_A_G;16_1888457_A_C;16_1888308_C_T;16_1888264_G_C;16_1888177_G_T;16_1887937_C_T;16_1887887_ATA_A;16_1887887_AT_A;16_1887886_AAT_A;16_1887886_AAT_A;16_1887665_A_G;16_1887638_G_A;16_1887574_A_G;16_1887490_T_C;16_1887281_C_T;16_1887273_C_T;16_1887016_T_G;16_1886981_T_G;16_1886966_A_G;16…		16_1877494_T_C;	0.2103960396039604	16	1	1876968	1890208
ENSG00000180190	ENSG00000180190	GGPPPAAAAAAQAQVQGASFR	Q86YL5	8_498120_T_C	rs4311637	0.0031080889495953994	9.335052367457763e-06	10.0	2.0749170524942e-11	-0.9408358885306428	0.2570313226820189	-0.09374698865987474	6.661521715246967e-05	0.015100077823558232	0.0006935482339842143	0.2540616913972258	False	498120,496803,498692,498958,510546,511288								0.4925742574257426	8	-1	439803	495781
ENSG00000181019	ENSG00000181019	SIPTDNQIK	P15559-3	16_69672410_G_A	rs10852458	7.25222592748157e-18	4.339012760249833e-22	10.0	2.3217162836630455e-30	-1.190897372921675	3.384574892455558e-34	-1.254925469943412	0.2779140960415406	-0.09855552307465802	0.4850784393829261	0.04500216144091111	False	69672410,69552343,69552372,69552508,69552612,69556948,69557096,69562838,69564364,69564497,69575992,69581672,69582104,69592449,69604460,69605211,69605821,69606347,69607098,69607853,69611582,69616292,69618536,69619084,69622104,69626087,69626132,69627793,69628217,69630492,69632852,69634053,69634757,69635059,69636327,69646122,69646327,69648495,69649098,69656500,69658776,69661527,69662909,69666970,696…	16_69745145_G_A;	16_69741491_AC_A;			16_69758395_C_A;16_69758076_C_T;16_69757828_A_G;16_69751065_C_G;16_69742248_G_C;16_69741571_T_C;16_69741491_AC_A;			0.21782178217821785	16	-1	69740899	69760854
ENSG00000181610	ENSG00000181610	SEHLSVRPQTALEENETQK	Q9Y3D9	17_55829772_T_C	rs80172984	0.09472344827258093	0.0004937165499602543	13.0	6.325197205328391e-07	-0.8570016424744813	0.4892056608326457	-0.10182264274707986	1.7202319718355654	-0.09314449523030567	0.6847843615638967	-0.02250615326410683	True	55829772,55819938,55825450								0.0891089108910891	17	-1	55916842	55927417
ENSG00000182010	ENSG00000182010	VEPALVVPINK	Q8IZC4	10_63971993_T_G	rs7080773	0.04062944935644626	0.00022688057556150449	9.0	6.400949928239622e-08	-0.8248466492501336	0.0010862620113281022	-0.4441902405449048	1.5469419342508944e-06	-0.3355356067197151	9.851632564533065e-06	-0.31400987684986564	False	63971993,63964653,63966387,63967267,63968115,63968460,63969738,63969845,63976912,63979071,63983266,63983788,63984850,63985383,63986403,63986592,63986651,63990387,63990649,63992681,63998755,64000093,64006617,64007604,64015436,64033809	10_63976912_TAGCTTC_T;	10_64000093_TA_T;10_63968115_G_GCTGAC;		10_63998755_T_A;	10_64015436_G_C;10_64007604_G_A;10_64006617_G_C;10_64000093_TA_T;10_63998755_T_A;10_63990649_G_A;10_63990387_A_C;10_63986651_C_T;10_63986592_C_T;10_63986403_T_C;10_63985383_C_G;10_63984850_C_T;10_63983788_A_G;10_63983266_C_G;10_63979071_G_A;10_63969845_T_C;10_63969738_C_T;10_63968460_C_A;10_63968115_G_GCTGAC;10_63967267_T_C;10_63966387_A_G;10_63971993_T_G;		10_63964653_C_T;	0.150990099009901	10	-1	63942794	64028466
ENSG00000182013	ENSG00000182013	AALIEVGEGVNLSTIPR	Q86V59	19_46970739_C_T	rs11083832	0.0535995484628043	0.0003511517623954213	8.0	7.869816019336458e-07	-0.6828763069121565	4.7553100531810345e-08	-0.5309228472123614	7.084508498545101e-25	-0.8530965880561014	1.0330071835313373e-27	-0.8538067585050507	False	46970739,46972424,46973981,46974233,46974307,46974399,46974652,46974728,46974781,46975167,46975520,46975590,46976735,46977330,46978870	19_46974233_G_A;			19_46974781_G_A;19_46974728_C_T;19_46974652_G_C;19_46974307_C_T;19_46970739_C_T;	19_46974399_C_G;19_46973981_G_A;19_46972424_G_T;		19_46974233_G_A;19_46973981_G_A;	0.35148514851485146	19	-1	46969748	46974820
ENSG00000182149	ENSG00000182149	GGSGGFTAPVGGPDGTVPMPMPMPMPMPSANT	P53990-2	16_72212044_G_A	rs7191623	0.0130011649279155	3.900968592956952e-05	13.0	1.4780862813453445e-07	-1.3154789327726517	0.9703801699988984	-0.004070784675669792	2.55001472816577	-0.0819018955626618	0.12500617873886954	0.16540140907022202	False	72212044,72215092,72215115,72217113,72220373,72230112								0.18564356435643564	16	1	71879899	71962913
ENSG00000182372	ENSG00000182372	VFWDLAATR	Q9UBY8	8_1714642_G_T	rs7461600	0.0207761989111555	0.00029170045138713003	3.0	1.2686498589934395e-07	0.5467804872507074	3.036876105861154e-06	0.4832686114828205	3.1139359356920983e-14	0.6105959230303489	2.0698428198847112e-19	0.6983981205501584	False	1714642,1704030,1704476,1704506,1704641,1705041,1706041,1706675,1707566,1707591,1707951,1707958,1708044,1708093,1708194,1708274,1709020,1709220,1709272,1709593,1710404,1710632,1710977,1711918,1716275,1716616,1717036,1721090,1721643,1723177,1723749,1724052,1724307,1725004,1726809,1732224,1734452,1738302,1744124,1744133				8_1734452_C_G;8_1732224_G_C;	8_1726809_C_A;8_1725004_G_A;8_1724307_C_T;8_1724052_G_A;8_1723749_A_G;8_1723177_A_G;8_1721643_G_A;8_1721090_G_A;8_1717036_G_A;8_1716616_T_A;8_1716275_G_A;8_1711918_G_C;8_1710977_A_C;8_1710632_T_C;8_1710404_G_C;8_1709593_C_G;8_1709272_G_A;8_1709220_C_G;8_1709020_A_G;8_1708274_G_C;8_1708194_G_A;8_1708093_A_C;8_1708044_A_G;8_1707958_T_C;8_1707951_G_A;8_1707591_T_G;8_1707566_A_G;8_1706675_C_T;8_17060…			0.2599009900990099	8	1	1703944	1734738
ENSG00000182481	ENSG00000182481	YFSVEEEEDQNVVPETTSEGYTFQVQDGAPGT	P52292	17_66067295_C_T	rs145762398	0.0008432063547763058	8.475449778773445e-07	25.0	2.1084616191513704e-12	-1.4052442636754745	0.5614614960670296	-0.0923293664027317	0.3754130237512289	-0.17536226685250353	0.16621744550428474	0.16053753072619822	True	66067295								0.06435643564356436	17	1	66031635	66042958
ENSG00000182919	ENSG00000182919	EPFTFPVK	Q9H0W9	11_93501015_C_T	rs10765633	5.3303424998618456e-06	7.2996061516728506e-09	9.0	9.797915300215643e-14	-0.683247957050674	3.895359011494296e-16	-0.6739531411927766	3.208806435351541e-17	-0.6629256500442381	7.286139745080445e-24	-0.8255207120389173	False	93501015,93475628,93476627,93476766,93476860,93477621,93478133,93478342,93478528,93480190,93480708,93481155,93481908,93482001,93482094,93482403,93483346,93486384,93486498,93486526,93487418,93487595,93488092,93489203,93490219,93490307,93491020,93491179,93491464,93491645,93492058,93492203,93492232,93492355,93493679,93493691,93493825,93493911,93493989,93494005,93494878,93496377,93496563,93498126,934…		11_93494878_AAG_A;11_93482001_CA_C;11_93480702_TACTTATGTATATCTA_T;		11_93496563_T_A;11_93496377_C_G;11_93494878_AAG_A;11_93488092_T_G;11_93480190_C_A;	11_93494005_A_G;11_93493989_T_A;11_93493911_G_A;11_93493825_C_T;11_93493691_T_A;11_93493679_C_A;11_93492355_G_A;11_93492232_G_A;11_93492203_A_C;11_93492058_G_A;11_93491645_T_A;11_93491464_A_G;11_93491179_A_G;11_93491020_T_C;11_93490307_C_T;11_93490219_G_C;11_93489203_C_T;11_93488092_T_G;11_93487595_C_G;11_93487418_C_G;11_93486384_C_G;11_93483346_G_A;11_93482403_T_A;11_93482094_G_A;11_93482001_C_A…			0.400990099009901	11	1	93474757	93497915
ENSG00000182934	ENSG00000182934	DAAGIAMEAIAFAR	P08240	11_125962645_C_T	rs4937097	2.592706440922782e-07	7.756092021427491e-11	32.0	0.0006677384122556457	0.3357074268827984	0.06013401079128145	0.1540959658423291	0.925241448415193	0.10491720182685242	0.3735404120197002	0.06097823236421281	False	125962645,125954422,125954442,125954596,125954659,125954776,125954816,125955327,125955394,125955570,125956133,125956336,125956370,125956434,125956435,125956456,125956626,125956767,125957098,125957475,125957966,125958060,125958082,125959249,125959738,125960664,125960750,125961267,125961325,125961406,125961618,125963527,125964821,125965625,125967949								0.4034653465346535	11	-1	126132814	126139039
ENSG00000183386	ENSG00000183386	GAHYCVPCYENK	Q13643	1_38463504_C_T	rs7366048	0.00267045193761605	6.5757908834039185e-06	12.0	1.9493213060761989e-10	0.5453522931203805	7.407696472038546e-09	0.4778567357151717	9.745853287126707e-12	0.5295041715020579	3.824064643084975e-11	0.5012915272889662	True	38463504,38397341,38397369,38398588,38400558,38402459,38405257,38405358,38407014,38407146,38407963,38408164,38408846,38408868,38410321,38415507,38434306,38444749,38445654,38452581,38455891,38456106,38461319,38461821							1_38463504_C_T;	0.448019801980198	1	-1	38462442	38471278
ENSG00000183431	ENSG00000183431	ETSSALTHAGAHLDLSAFSSWEELASLGLDR	Q12874	1_38197564_C_T	rs900678	0.0007487463029271472	7.454312839959155e-07	25.0	1.2150810578184234e-10	-0.8365715908989522	0.03217340462275427	-0.2351940347471715	0.16251820827280886	-0.3735027098643795	0.02053809514266437	-0.1931922868523525	True	38197564								0.10148514851485148	1	-1	38422647	38456593
ENSG00000183520	ENSG00000183520	QYNCLTQR	Q9Y3A2	1_38225087_T_C	rs55988842	0.04804102099434992	0.00022419526370463636	11.0	4.003481575456285e-07	-0.803180916270323	0.18409523715656528	-0.09534927185560303	1.5734768614581744	0.07497638183095141	0.19642095930916195	-0.08811076164225715	False	38225087,38202206,38205602,38206027,38212465,38213310,38214463,38216333,38220109,38224416,38224716,38224842,38225134,38227086								0.2747524752475248	1	1	38474930	38490496
ENSG00000183828	ENSG00000183828	RFPGSLAAVDQDGPR	O95848	14_105618670_T_C	rs2238287	0.0274769583040228	0.0003148161729819532	4.0	2.5857655032512964e-07	0.8207182703912443	0.0016927821833106935	0.4676345869598768	2.3882684477781327e-27	1.0674807871689658	3.3960177688245124e-19	0.7700840846138809	False	105618670,105609335,105610115,105610431,105611282,105614032,105614974,105615026,105622538,105623498,105623512,105624693,105626594,105629257,105629584,105629947,105629987,105630001,105630032,105630465,105631363,105633544,105637130,105637156,105637258,105638931,105639041,105640460,105640486,105642016,105642138,105642639,105643619,105643652,105644151,105644282,105644421,105646470	14_105643652_A_C;14_105643619_G_A;				14_105646470_C_T;14_105644421_G_A;14_105644282_C_G;14_105644151_T_C;14_105643652_A_C;14_105643619_G_A;14_105642639_A_G;14_105642138_C_T;14_105642016_C_T;14_105640486_A_G;14_105640460_G_A;	14_105646470_C_T;14_105644421_G_A;14_105644282_C_G;14_105644151_T_C;14_105643652_A_C;14_105643619_G_A;		0.36386138613861385	14	-1	105639275	105647660
ENSG00000183856	ENSG00000183856	VLSVHTDPVHLYK	Q86VI3	1_156524221_G_T	rs6694580	0.0014102213164408025	7.34547138479326e-07	51.0	5.247637771200344e-10	0.8333582116353746	1.3644471596349608e-10	0.7402892658158912	1.942751765109549e-09	0.3882611479734904	1.657195581500197e-09	0.4304367061520048	False	156524221,156516796,156518379,156519390,156520320,156520953,156521105,156522795,156523717,156525023,156525582,156526387,156526564,156529034,156529779,156529896,156530199,156532344,156532908,156534525,156534539,156536752,156538730	1_156526387_C_G;1_156518379_G_A;				1_156538730_T_C;1_156536752_A_G;1_156534539_G_A;1_156534525_A_C;1_156532908_C_A;1_156532344_T_G;1_156530199_A_G;1_156529896_C_T;1_156529779_C_T;1_156529034_G_A;1_156526564_C_A;1_156525582_G_A;1_156525023_T_C;1_156523717_T_C;1_156522795_G_A;1_156521105_G_A;1_156520953_A_G;1_156520320_C_T;1_156519390_A_G;1_156516796_T_C;1_156524221_G_T;	1_156538730_T_C;1_156536752_A_G;1_156534539_G_A;1_156534525_A_C;1_156532908_C_A;1_156532344_T_G;1_156530199_A_G;1_156529896_C_T;1_156529779_C_T;1_156529034_G_A;1_156526564_C_A;1_156526387_C_G;1_156525582_G_A;1_156525023_T_C;1_156523717_T_C;1_156522795_G_A;1_156521105_G_A;1_156520953_A_G;1_156520320_C_T;1_156519390_A_G;1_156518379_G_A;1_156516796_T_C;1_156524221_G_T;		0.2920792079207921	1	-1	156495197	156542396
ENSG00000184076	ENSG00000184076	AFDQGADAIYDHINEGK	Q9UDW1	22_30170217_G_A	rs5997519	8.825268400068978e-07	3.0624959148258986e-09	3.0	7.857331710169952e-14	-1.0539586967952157	6.528494636647933e-11	-0.7837708504002252	3.325111033883404e-05	-0.5539722949566863	0.03659686234172304	-0.18360682676301074	False	30170217,30133788,30135079,30135416,30136137,30137045,30137172,30138497,30139118,30139825,30140278,30140900,30141741,30142104,30143534,30143850,30146149,30149144,30149961,30150320,30161278,30161653,30161718,30161801,30163526,30164511,30166630,30167343,30170335,30171670,30172404,30172589,30172693,30173177,30180911,30181208,30182342,30182616,30185363,30188672,30188741,30190057,30190429,30195525,301…	22_30163526_A_G;				22_30164511_T_C;			0.06435643564356436	22	1	30163358	30166402
ENSG00000184117	ENSG00000184117	LHLDEDYPCSLVGNWNTWYGEQDQAVHLWR	Q9BPW8	22_29935773_G_A	rs4823046	0.01507010101070994	3.786910628513926e-05	16.0	2.4078818844842608e-08	0.6498758122491337	3.636402892102232e-08	0.5009459937489877	5.495431627604264e-07	0.32737373885575083	1.618844407219952e-07	0.3351359276202516	False	29935773,29893040,29913801,29936982,29939683,29949509,29961986,29963600,29965168,29966317,29972079,29973501,29978758,29979059,29986237,29999878,30008750,30026279,30037109					22_29973501_T_C;22_29972079_C_G;22_29966317_C_G;22_29965168_G_C;22_29963600_G_C;22_29961986_G_T;	22_29973501_T_C;22_29972079_C_G;22_29966317_C_G;22_29965168_G_C;22_29963600_G_C;22_29961986_G_T;		0.15594059405940594	22	-1	29950797	29977326
ENSG00000184508	ENSG00000184508	DPEGTPYINHPIGVAR	Q8N4P3	15_91591230_T_A	rs111208025	0.06985569971713113	0.0008225201450479482	5.0	1.3535166845628644e-06	-1.0028231331110111	0.00027043630915249005	-0.6447928216078607	0.3728712647140237	-0.3273802727927271	0.8707703504034534	-0.021008775301978082	False	91591230								0.054455445544554455	15	-1	91474148	91475799
ENSG00000184674	ENSG00000184674	GQHLSDAFAQVNPLK	P30711	22_24295427_C_T	rs2739334	4.967807767315507e-13	9.24697974318497e-17	9.0	8.711695209159229e-24	0.8912301269561373	8.924103592862669e-14	0.7448552681276178	4.334231217722834e-25	0.9847352137813892	9.398467179168326e-27	0.9799719986252038	False	24295427,24241101,24241611,24242887,24243573,24243736,24247293,24249573,24254862,24256102,24257337,24259772,24260463,24263474,24265659,24266726,24266831,24266867,24266954,24267047,24267078,24269459,24272122,24273325,24292488,24295217,24295286,24295805,24296029,24296294,24296483,24296894,24297130,24297195,24297197,24297287,24297619,24298180,24298293,24298325,24312204,24338936,24399655,24401542,244…								0.4950495049504951	22	-1	24376133	24384680
ENSG00000185163	ENSG00000185163	GGYRPSDLCVSAPTGSGK	Q8N8A6	12_132568752_A_C	rs56896704	0.00033434911603322167	3.700765015325237e-07	20.0	2.799880106731331e-13	1.0084249989574854	3.0255128571795404e-07	0.5729432140477297	2.9314005852802053e-23	0.8291553333046202	1.5988746326437796e-21	0.8240526901257572	False	132568752,132552494,132554702,132568660,132568726,132569028,132570198,132575289,132579551,132586159,132590378,132595647,132597110,132598995,132602272,132602374,132603010,132603579,132604134,132604145,132604248,132604743,132604906,132608889,132610313,132613274,132614254,132614670,132615464,132617807,132618066,132625105,132625643,132626425,132632910	12_132626425_G_A;				12_132625643_C_T;12_132625105_G_A;			0.21782178217821785	12	-1	132621139	132628880
ENSG00000185437	ENSG00000185437	EENIIYSFLGLAPPPDSK	P55822	21_40779232_T_C	rs2837009	0.07488253570384637	0.0011648593564078055	4.0	7.147744042494928e-06	0.4309879279250949	0.1802904124973113	0.1267868965031438	8.133552195490551e-08	0.6573913162948992	2.037783048332277e-09	0.517563274855948	False	40779232,40781529,40784240,40786319,40786415,40786828,40787400,40788083,40788220,40788355,40788587,40791610,40791729,40793465,40793768,40796623,40797606,40797740,40798163,40798237,40798566,40798847,40798939,40799096,40799523,40799570,40800371,40800567,40801021,40801603,40803356,40803537,40803568,40804937,40805517,40807360,40809365,40809770,40810043,40810373,40810489,40810707,40810988,40811819,408…	21_40823902_C_G;	21_40828551_A_AT;21_40825328_TA_T;			21_40837401_C_A;21_40834636_A_G;21_40832365_T_C;21_40830470_G_A;21_40830276_A_T;21_40830061_A_G;21_40828551_A_AT;21_40828498_T_C;21_40828483_G_C;21_40828452_A_G;21_40828382_T_C;21_40827937_C_T;21_40827582_G_A;21_40826615_T_C;21_40825555_T_C;21_40825328_TA_T;21_40824161_C_T;21_40823902_C_G;21_40823433_A_T;21_40822488_A_G;21_40820201_T_C;			0.2599009900990099	21	1	40817781	40887433
ENSG00000185838	ENSG00000185838	AVTTLDGHGGQCVTWLQTLPQGR	Q9BYB4	22_19771190_G_A	rs5746832	0.013595032092068866	4.473655409021106e-05	12.0	3.0599771622090734e-08	0.5652143855270972	0.00023713348763157167	0.353394736966115	3.4544088409740635e-05	0.4261615215939004	2.151285210169123e-05	0.3444602457450121	False	19771190,19765322,19767051,19767420,19767421,19768045,19769498,19771568				22_19771568_A_G;22_19771190_G_A;				0.4381188118811881	22	-1	19770747	19842462
ENSG00000186566	ENSG00000186566	MDAPASGSACSGLNK	Q9UKJ3	17_42339303_G_T	rs2074106	0.016587070981857473	3.364255751375902e-05	20.0	4.030344514095289e-05	0.7329851057264678	0.5647767870109636	-0.03939198730041965	0.057124851854451035	0.1974952251932596	0.14424174069805198	0.1019218868267427	False	42339303								0.28465346534653463	17	-1	42472652	42580798
ENSG00000186716	ENSG00000186716	EFYDGLFPR	P11274	22_23660980_G_A	rs13057338	0.09353219828079687	0.0001969106274384073	32.0	1.4509072267433015e-08	-0.8622377894549259	0.00037086631803288927	-0.3905404605134351	9.667571006554616e-05	-0.16632765284162604	0.6925243158712887	0.021105086896131317	False	23660980								0.3069306930693069	22	1	23521891	23660224
ENSG00000187498	ENSG00000187498	FSTMPFLFCNINNVCNFASR	P02462	13_111157494_G_C	rs183541358	0.0048032961716810785	3.104906909927926e-05	5.0	4.890562784554528e-05	-1.2368154512529284	0.25883444553913	-0.19410526214616874	0.3605437474164411	-0.2591059906733028	0.2315305460135905	-0.1621004053008618	False	111157494								0.07920792079207921	13	-1	110801318	110959496
ENSG00000188732	ENSG00000188732	AFQASSSSSPETLTDVGTSSQVSSLR	A4D161	7_23717467_A_G	rs2191303	0.00025653106261269286	6.105202585679605e-07	9.0	2.148988762006015e-11	-0.844224316689099	4.675376217059305e-06	-0.4998530323927984	3.1450958993855662e-15	-0.8274120416959984	2.928819246621459e-17	-0.8019048931194479	False	23717467								0.3910891089108911	7	1	23719749	23742868
ENSG00000189171	ENSG00000189171	DSLSVNEFK	Q99584	1_153631071_G_A	rs3806234	2.733412056262359e-05	1.1202508427304752e-07	4.0	4.231099696276785e-10	0.4246884871351879	3.6239699722867264e-12	0.4710957232993626	1.6037189914544599e-15	0.4260543835063436	1.44600227620399e-10	0.4632906828823844	False	153631071,153623136,153626239,153628645,153629026,153629755,153630120,153637617,153639310,153640665,153642012,153642909,153643803,153645066,153645880,153648661								0.400990099009901	1	-1	153591263	153606568
ENSG00000196151	ENSG00000196151	AHDLGITCCDFSSQPVSDGEQGLQFFR	Q8N9V3	2_160090248_T_C	rs11680483	0.032064196696519234	0.00021705365718767191	7.0	8.842031237345643e-08	0.5203599246723669	6.055043821993798e-07	0.5051086578854702	2.688626853076105e-05	0.40158112153252107	1.3557829105227912e-10	0.4558216240102101	False	160090248								0.4455445544554456	2	-1	160092304	160143310
ENSG00000196208	ENSG00000196208	EVNYELVTGK	Q4ZG55	2_11885941_G_A	rs62113306	0.004514081343167356	2.8952346535092766e-05	5.0	1.0351271116515773e-05	0.8462225740583359	0.4587256444224721	0.09362904577806014	0.3702325630856115	0.14847538847482186	0.20829605980488708	0.06735909750569276	False	11885941,11885116,11890428								0.5	2	1	11674242	11782914
ENSG00000196305	ENSG00000196305	PQECLMGTVGTLLLENPLGQNGLTHQGLLYEA	P41252	9_94966135_C_T	rs72748400	0.011011179192970368	6.4663730314661076e-06	65.0	1.7447842118632584e-09	-0.9372635191424536	0.6056319204396641	-0.05782631840615915	0.5224696695515848	0.06994142676375814	0.2421520108816705	-0.08522204127668767	True	94966135,94966284,94969508,94984437,94985637,94986357,94991509,95006416,95008391	9_94985637_T_C;	9_95006416_C_CATG;			9_95008391_C_T;9_95006416_C_CATG;9_94991509_A_T;9_94986357_A_C;			0.1782178217821782	9	-1	94972489	95056038
ENSG00000196365	ENSG00000196365	ILPVGGIK	P36776	19_5696962_G_A	rs3892355	0.012413109780414232	1.1957105867217253e-05	40.0	2.741729011469109e-09	-0.5754796972190029	4.4031793894501936e-07	-0.5016405499789872	1.0068769366558123e-09	-0.5618200300833032	1.1470617224886978e-12	-0.5102482816705172	False	5696962,5666336,5669282,5669970,5672663,5708720					19_5708720_C_T;19_5696962_G_A;	19_5708720_C_T;19_5696962_G_A;		0.32673267326732675	19	-1	5691845	5720583
ENSG00000196586	ENSG00000196586	SLDSYPVTSK	A0A0D9SGC1	6_76548895_A_T		0.07081565068628554	7.275790694105334e-05	58.0	2.847147489634913e-09	-0.4289519806481473	1.85759654243925e-09	-0.3962118153708485	2.3169087661405374e-08	-0.3714994204859482	0.039157359715588994	-0.08077052984848812	False	76548895,76536333,76536805,76537322,76538403,76539195,76539354,76539593,76540988,76541357,76541562,76541987,76542164,76550839,76557221,76558380,76563631,76573743,76574145,76577017,76584271,76584792,76587925,76592432,76592530,76593050,76596167,76599409,76604573,76604797,76606296,76607216,76609392,76614904,76615956,76622964,76626756		6_76615956_C_CTT;6_76592432_C_CAAT;6_76550839_G_GT;		6_76626756_T_C;	6_76622964_G_T;6_76615956_C_CTT;6_76614904_A_G;6_76609392_G_A;6_76607216_T_C;6_76606296_A_T;6_76604797_A_G;6_76604573_T_G;6_76599409_T_C;6_76592530_G_A;6_76592432_C_CAAT;6_76587925_G_A;6_76584792_A_T;6_76584271_T_C;6_76577017_A_T;6_76574145_T_C;6_76573743_G_A;6_76563631_G_A;6_76558380_A_C;6_76557221_T_A;6_76550839_G_GT;6_76542164_T_C;6_76541987_G_C;6_76541562_A_G;6_76541357_C_G;6_76540988_A_G;6_7…			0.4727722772277228	6	1	76458909	76629254
ENSG00000196655	ENSG00000196655	LALEVAEK	Q9Y296	11_118876552_T_C	rs74884652	0.04696864695415326	0.00021867983178367167	11.0	8.737611068636394e-07	0.6104594859884225	1.0488802163228357e-05	0.5461449546891748	2.5871794631587912e-15	1.0729555056163351	2.3501222271643557e-17	0.9455255241414762	True	118876552,118867695,118877891,118890085,118893767,118898319				11_118890085_C_T;	11_118893767_C_T;11_118890085_C_T;	11_118893767_C_T;11_118890085_C_T;		0.12623762376237624	11	1	118889142	118896164
ENSG00000196743	ENSG00000196743	EGTYSLPK	P17900	5_150639224_T_A		0.03587230158073194	0.0003494083222055259	5.0	1.5842234617936568e-06	-0.439445636744475	0.0016615774799660546	-0.3060742708919917	6.5733265780567045e-12	-0.44360627458828106	9.674739246319183e-08	-0.4129842563248224	False	150639224,150638537,150639162,150639409,150639439,150639980,150640553,150641551,150642396,150643266,150647956	5_150639439_A_G;5_150639409_A_G;	5_150640553_AT_A;		5_150647956_T_C;	5_150643266_T_C;5_150642396_T_C;5_150641551_G_C;5_150640553_AT_A;5_150639980_A_G;5_150639162_C_G;5_150638537_C_T;5_150639224_T_A;			0.3094059405940594	5	1	150591711	150650001
ENSG00000197020	ENSG00000197020	LNQCLITTQSNIFQCDPSAK	A0A075B7G6	19_21932574_G_C	rs12972593	0.005183232682508925	3.411245632858572e-05	5.0	2.012756598290095e-08	0.6291715315188927	0.00031453402502254816	0.2777068750139198	3.9111898181290576e-20	0.6017698962846794	9.029080514726094e-21	0.7213394738159156	False	21932574,21890339,21908053,21909948,21912755,21914073,21922636,21924189,21924452,21930779,21936885,21942877,21950402	19_21909948_G_A;	19_21930779_T_TA;19_21914073_T_TAGGTAAA;		19_21950402_T_C;19_21908053_C_T;	19_21942877_G_A;19_21936885_A_G;19_21930779_T_TA;19_21924452_C_T;19_21924189_T_A;19_21922636_T_G;19_21914073_T_TAGGTAAA;19_21912755_A_G;19_21932574_G_C;			0.4207920792079208	19	-1	21905568	21950430
ENSG00000197818	ENSG00000197818	GFVWLDAK	Q9Y2E8	20_48499085_C_T	rs488255	0.0181818526012192	0.0003731228576174574	2.0	1.3106374413513194e-07	0.6360088401922739	4.4596833202506675e-05	0.4761099684353285	1.6777918047108368e-05	0.2911024387371967	3.202821780643184e-07	0.34080710919570645	False	48499085,48514174,48514919,48515838,48516733,48519258,48519702,48520610,48522330,48523755,48533576,48544173,48548870,48549242,48551679,48551956,48554977,48556016,48556229,48556461,48557172,48561280,48562446,48563148,48568503,48568929,48569127,48572650,48573980,48574454,48576312,48577143,48578319,48579002,48579164,48579348,48579557,48580010,48580969,48581741,48582769,48586445,48588417,48589996					20_48499085_C_T;			0.4777227722772277	20	1	48429250	48508779
ENSG00000198042	ENSG00000198042	ALIAAQLDNAIEK	Q9BXY0	8_33309179_C_T	rs2956628	0.000967479622817075	2.2417043921811544e-06	11.0	2.904220525618257e-09	0.39573429980758457	2.6718879330053556e-07	0.3810228880020259	5.590640664130304e-23	0.6556005134745561	2.706922172731691e-25	0.6872292951189329	False	33309179,33279515,33279794,33280791,33282043,33283180,33283278,33283516,33284007,33284877,33286370,33287134,33291163,33292032,33293829,33294380,33294524,33296481,33296969,33302508,33303493,33304742,33304891,33304971,33306678,33306864,33307340,33308266,33308994,33309012,33309874,33309983,33311091,33311198,33313042,33313329,33313421,33313635,33314105,33315780,33317002,33317451,33320166,33323419,333…	8_33356074_A_G;	8_33356561_AG_A;8_33345202_AGTG_A;8_33343021_TGCTGTCA_T;		8_33358730_C_T;8_33358162_A_T;8_33356561_AG_A;8_33356074_A_G;8_33342495_T_A;	8_33355886_G_T;8_33355287_G_A;8_33353328_A_G;8_33353273_T_C;8_33352067_C_G;8_33350296_A_G;8_33350193_G_T;8_33348104_G_A;8_33348000_A_G;8_33347907_T_G;8_33345632_A_G;8_33345202_AGTG_A;8_33343309_T_C;8_33343021_TGCTGTCA_T;	8_33356074_A_G;8_33355886_G_T;8_33355287_G_A;8_33353328_A_G;8_33353273_T_C;8_33352067_C_G;8_33350296_A_G;8_33350193_G_T;8_33348104_G_A;8_33348000_A_G;8_33347907_T_G;8_33345632_A_G;8_33345202_AGTG_A;8_33343309_T_C;8_33343021_TGCTGTCA_T;		0.4034653465346535	8	1	33342268	33358778
ENSG00000198053	ENSG00000198053	VTTVSDLTK	P78324	20_1896100_C_T		0.00032493584235642083	2.3847550952726826e-06	3.0	6.5411350054385195e-12	-0.9240773925543044	0.12812765126917675	-0.15473253008033194	1.1352018145529061e-05	-0.3641738460429633	0.012849246957935451	-0.1291787645273326	False	1896100,1885099,1888865,1889858,1890990,1893747,1893763,1893784,1893809,1893815,1893980,1893986,1894315,1894335,1894467,1894584,1894630,1894689,1894690,1894789,1894847,1894977,1895016,1896244,1896288,1896401,1897407,1897442		20_1894688_AG_A;20_1890990_CTT_C;	20_1896100_C_T;		20_1897442_C_T;20_1897407_A_G;20_1896401_T_A;20_1896288_A_G;20_1896244_A_G;20_1895016_G_A;20_1894977_A_G;20_1894847_C_G;20_1894789_T_C;20_1894690_T_A;20_1894689_G_T;20_1894688_AG_A;20_1894630_G_A;20_1894584_T_C;20_1894467_T_A;20_1894335_G_A;20_1894315_C_T;20_1893986_C_G;20_1893980_G_C;20_1893815_G_A;20_1893809_G_A;20_1893784_G_A;20_1893763_C_G;20_1893747_T_C;20_1890990_CTT_C;20_1889858_A_G;20_188…		20_1896100_C_T;	0.3712871287128713	20	1	1875154	1920543
ENSG00000198056	ENSG00000198056	LGAFQAQEK	P49642	12_57146069_T_G	rs2277339	0.06813775917021586	0.00018791589279807902	21.0	2.8907983741368884e-08	-0.9778574707852646	1.88656337773914e-05	-0.6165405651467295	1.2835630740323496e-06	-0.5652313998825673	2.398458229822181e-09	-0.6786695346516034	True	57146069	12_57146069_T_G;					12_57146069_T_G;		0.1113861386138614	12	-1	57125380	57146157
ENSG00000198087	ENSG00000198087	VLFEYIPQNEDELELK	Q9Y5K6	6_47409828_T_C		0.0012067456465248206	1.0154537279638505e-06	31.0	1.841630509468761e-10	-0.36860393298354177	3.211240793327487e-10	-0.476799672038541	6.311769651034838e-23	-0.4087629856393917	3.036305657403405e-19	-0.4576026091884197	True	47409828,47392543,47394836,47396116,47397153,47397179,47397427,47397625,47397746,47400463,47400802,47407980,47410478,47411036,47412392,47421188,47422357								0.4777227722772277	6	1	47445525	47594999
ENSG00000198130	ENSG00000198130	TLQEVLTMEYR	Q6NVY1	2_191163706_A_G	rs2664260	0.0009102448875135346	1.4431907095314508e-06	16.0	5.824266318564681e-10	0.46452586731509904	3.89232858380757e-11	0.5917392252152511	5.787675619300454e-16	0.8341285496788586	2.038561762479473e-08	0.4825415332585528	False	191163706,191085818,191136004,191136794,191141283,191143132,191143350,191143798,191144892,191145274,191147667,191148347,191148558,191151588,191160196,191163459,191163784,191164679,191166212,191166849,191167414,191172439,191176223,191176479,191177005,191177216,191177467,191177958,191181481,191181527,191181585,191181644,191181678,191182710,191184475,191188119,191189558,191190605,191191233,191194059…		2_191205515_GT_G;2_191204977_TA_T;2_191177958_C_CCCTT;2_191172439_GA_G;2_191166849_GAA_G;2_191143350_GAGC_G;2_191085818_TACACAC_T;			2_191205969_C_T;2_191205515_GT_G;2_191204977_TA_T;2_191202637_A_G;2_191199530_G_A;2_191198727_A_C;2_191197941_G_A;2_191197226_G_T;2_191194059_C_T;2_191191233_G_T;2_191190605_T_C;2_191189558_T_A;2_191188119_A_G;2_191184475_A_G;2_191182710_C_G;2_191181678_T_C;2_191181644_T_G;2_191181585_G_A;2_191181527_T_C;2_191181481_A_C;2_191177958_C_CCCTT;2_191177467_C_T;2_191177216_T_C;2_191177005_A_C;2_1911764…	2_191148558_G_A;2_191148347_G_A;2_191147667_C_T;2_191145274_G_A;2_191144892_A_T;2_191143798_T_C;2_191143350_GAGC_G;2_191143132_G_A;2_191141283_C_T;2_191136794_A_C;2_191136004_C_A;		0.4430693069306931	2	-1	191054461	191208919
ENSG00000198554	ENSG00000198554	SYLAWIGFSAEGTPCYVDSEGIVR	O75717	14_55363347_T_C	rs113352553	0.007791347283083851	5.409458958740488e-06	52.0	2.4730642318444794e-10	-1.1427967452628405	0.6642380428920309	0.04920547583354673	0.055769452557471344	-0.2113463222891868	0.5107922604925995	0.06102437575561516	True	55363347,55283242,55287536,55287623,55299338,55300157,55304671,55309505,55311024,55311125,55315004,55315416,55316057,55316541,55317054,55317305,55325993,55329452,55331897,55353558,55359822,55364548,55365458,55372449,55372524,55379818,55396880,55397891,55416151,55434558,55442252,55442997,55448409,55462074,55478734,55481714	14_55448409_G_C;			14_55448409_G_C;	14_55481714_T_C;14_55478734_C_T;14_55442997_G_C;14_55442252_G_A;14_55434558_C_T;14_55416151_G_A;	14_55448409_G_C;14_55442997_G_C;14_55442252_G_A;14_55434558_C_T;14_55416151_G_A;		0.1113861386138614	14	-1	55405668	55493823
ENSG00000198794	ENSG00000198794	AQEEWTTGAWK	Q8TAC9	15_75297601_T_C	rs9672995	0.005792287759482218	0.00019614902906945884	1.0	1.2048215437260621e-08	0.6930947971648066	1.822419822919685e-07	0.6377364441378512	1.56275336717431e-23	0.9392038774294608	1.526036013519075e-06	0.3421980332887135	False	75297601,75287822,75290377,75292732,75303554,75308561,75308690,75310394,75311959,75312187,75314294,75315778,75316845,75318482,75321139,75321262,75322179,75322310,75325970,75331805,75332002,75332129,75332412,75332485,75333000,75334184,75334972,75348962,75349901,75349961,75350433,75351928,75352201,75353975,75354621,75354971,75355944,75358388,75361006,75361121,75361539				15_75312187_A_G;15_75311959_A_G;	15_75310394_T_C;15_75308690_C_T;15_75308561_G_T;15_75303554_G_T;15_75290377_C_T;15_75287822_C_A;15_75297601_T_C;	15_75310394_T_C;15_75308690_C_T;15_75308561_G_T;15_75303554_G_T;15_75290377_C_T;15_75287822_C_A;15_75297601_T_C;		0.25	15	1	75249560	75313837
ENSG00000198826	ENSG00000198826	LQAAVVQTLIDYASDIGR	Q6P4F7	15_32937244_G_A	rs72715243	0.09272209359200116	0.000516848653004753	12.0	4.6085830100781604e-07	-1.6279794695380154	0.6992997017933783	-0.058828945000793276	0.004234889739741325	-0.5653777817380409	0.11891508884962748	-0.15114327832452318	False	32937244								0.07920792079207921	15	1	32907345	32932150
ENSG00000203485	ENSG00000203485	DLEQPSQAAGINLEIIR	Q27J81-2	14_105163560_T_C	rs6576058	0.07008561772968812	0.0001181292314081822	35.0	1.4869641407424325e-08	0.5175542636455361	4.102112047043486e-07	0.4807455966284688	2.0925049002137428e-05	0.30251435589876485	2.800716605428986e-05	0.2695348365832794	False	105163560,105168839					14_105168839_T_C;14_105163560_T_C;			0.34405940594059403	14	1	105155943	105185942
[truncated: 14 more rows]
