# Supplementary material for: Population-scale proteome variation in human induced pluripotent stem cells
Source: eLife. 2020 Aug 10;9:e57390. doi: 10.7554/eLife.57390 (PMC7447446; doi:10.7554/eLife.57390)
Supplement: Figure 4—source data 1. — Reported are the trans pQTL (FDR < 10%). [file elife-57390-fig4-data1.xls]

snp_id	snp_id	cis_trans_proteins	snp_id.1	snp_rsid	q_value	trans_p_value	trans_effect_size	cis_p_value	cis_effect_size	number_lines_trans_protein	number_lines_cis_protein	cis_gene_name	cis_protein_id	cis_ensembl_gene_id	trans_gene_name	trans_protein_id	trans_ensembl_gene_id	pair_no_isoform	pair_in_corum	pair_in_intact	pair_in_string	length_sequence_aligned	identical_aa_aligned
14_20916716_G_C	14_20916716_G_C	Q9NPF4_Q96S44	14_20916716_G_C	rs938884	1.407686640382067e-09	2.054708936896712e-16	-0.6662350675472171	3.4900000000000004e-11	-0.651257489	202	202	OSGEP	Q9NPF4	ENSG00000092094	TP53RK	Q96S44	ENSG00000172315	Q9NPF4_Q96S44	0	1	1
6_42928017_C_G	6_42928017_C_G	Q13608_Q7Z412-2	6_42928017_C_G		3.9037333593444195e-09	1.1396053056992535e-15	0.7436526328082995	3.3599999999999996e-20	0.95530889	174	202	PEX6	Q13608	ENSG00000124587	PEX26	Q7Z412-2	ENSG00000215193	Q13608_Q7Z412	1	1	1	169.0	54.0
14_91622583_G_A	14_91622583_G_A	Q7Z3D6-2_Q9ULX5	14_91622583_G_A	rs28548905	3.552094581315656e-06	1.5554286596662032e-12	-0.6895738442418079	1.7199999999999995e-31	-1.1348834490000002	186	202	C14orf159	Q7Z3D6-2	ENSG00000133943	RNF112	Q9ULX5	ENSG00000128482	Q7Z3D6_Q9ULX5	0	0	0	46.0	17.0
2_44145374_G_T	2_44145374_G_T	P42704_Q9GZT3-2	2_44145374_G_T	rs7568481	9.156089967417127e-05	5.3458203959302035e-11	0.6137920266306587	7.959999999999999e-17	0.73308192	202	202	LRPPRC	P42704	ENSG00000138095	SLIRP	Q9GZT3-2	ENSG00000119705	P42704_Q9GZT3	0	1	1
14_20916716_G_C	14_20916716_G_C	Q9NPF4_Q9Y3C4-2	14_20916716_G_C	rs938884	0.0007067994312310378	5.158346560530543e-10	-0.6014998881283331	3.4900000000000004e-11	-0.651257489	202	202	OSGEP	Q9NPF4	ENSG00000092094	TPRKB	Q9Y3C4-2	ENSG00000144034	Q9NPF4_Q9Y3C4	0	0	1	29.0	9.0
7_130143420_T_C	7_130143420_T_C	Q9UBF2_Q9Y678	7_130143420_T_C	rs1008633	0.0009753435190346145	8.541874253608527e-10	-0.6061736952472556	4.26e-06	0.459728875	202	202	COPG2	Q9UBF2	ENSG00000158623	COPG1	Q9Y678	ENSG00000181789	Q9UBF2_Q9Y678	0	0	1	874.0	704.0
9_106896809_G_A	9_106896809_G_A	O95347_Q9NTJ3	9_106896809_G_A	rs7872034	0.0011378899182178707	1.3361564111606467e-09	0.5141294953721074	6.3e-16	0.676971164	202	202	SMC2	O95347	ENSG00000136824	SMC4	Q9NTJ3	ENSG00000113810	O95347_Q9NTJ3	1	1	1	1271.0	302.0
2_238509324_G_A	2_238509324_G_A	Q9H0T7_Q13045	2_238509324_G_A	rs10929237	0.0011378899182178707	1.473445359093886e-09	-0.6058016289950384	1.14e-11	-0.7178755090000001	202	202	RAB17	Q9H0T7	ENSG00000124839	FLII	Q13045	ENSG00000177731	Q9H0T7_Q13045	0	0	0	24.0	7.0
14_24747931_A_G	14_24747931_A_G	Q96LJ7_Q9UMR3	14_24747931_A_G	rs55841854	0.0011378899182178707	1.494813735803528e-09	-1.418580279131029	4.99e-17	-1.6712141	135	202	DHRS1	Q96LJ7	ENSG00000157379	TBX20	Q9UMR3	ENSG00000164532	Q96LJ7_Q9UMR3	0	0	0
17_40704008_C_G	17_40704008_C_G	Q9P2W1_Q9BWT6	17_40704008_C_G	rs2676532	0.0016623533552372267	2.4264294320212522e-09	-0.4918518691490208	4.66e-14	-0.7180281279999999	202	202	PSMC3IP	Q9P2W1	ENSG00000131470	MND1	Q9BWT6	ENSG00000121211	Q9P2W1_Q9BWT6	1	1	1	190.0	47.0
1_40469584_C_T	1_40469584_C_T	P50897_Q6AI39	1_40469584_C_T	rs10789071	0.0033691766581630325	5.5212945868062135e-09	0.7755451830584905	2.12e-05	-0.383167718	140	202	PPT1	P50897	ENSG00000131238	GLTSCR1L	Q6AI39	ENSG00000112624	P50897_Q6AI39	0	0	0	52.0	18.0
17_80523375_G_A	17_80523375_G_A	Q9H479_Q6ZRV2	17_80523375_G_A	rs79680939	0.0033691766581630325	5.901322516749151e-09	-1.193208517072672	2.37e-07	-0.787922641	198	202	FN3K	Q9H479	ENSG00000167363	FAM83H	Q6ZRV2	ENSG00000180921	Q9H479_Q6ZRV2	0	0	0	46.0	22.0
9_106896809_G_A	9_106896809_G_A	O95347_Q15003	9_106896809_G_A	rs7872034	0.0056123197347162	1.089264439554048e-08	0.4144503556414012	6.3e-16	0.676971164	202	202	SMC2	O95347	ENSG00000136824	NCAPH	Q15003	ENSG00000121152	O95347_Q15003	1	1	1	88.0	25.0
9_106896809_G_A	9_106896809_G_A	O95347_Q15021	9_106896809_G_A	rs7872034	0.0056123197347162	1.146871502418934e-08	0.4878636135570069	6.3e-16	0.676971164	202	202	SMC2	O95347	ENSG00000136824	NCAPD2	Q15021	ENSG00000010292	O95347_Q15021	1	0	1	142.0	48.0
2_238506581_C_T	2_238506581_C_T	Q32MZ4_Q13045	2_238506581_C_T	rs13391122	0.005824295312700887	1.2752019469564682e-08	-0.5948170598148907	2.96e-08	-0.464657266	202	202	LRRFIP1	Q32MZ4	ENSG00000124831	FLII	Q13045	ENSG00000177731	Q32MZ4_Q13045	0	1	1	45.0	16.0
17_33048609_C_T	17_33048609_C_T	Q96NB3_Q96H79	17_33048609_C_T	rs76262774	0.007335442044394659	1.8056122090527605e-08	-0.9535577205043256	4.01e-05	-0.5857558620000001	177	202	ZNF830	Q96NB3	ENSG00000198783	ZC3HAV1L	Q96H79	ENSG00000146858	Q96NB3_Q96H79	0	0	0	32.0	12.0
2_197812774_G_T	2_197812774_G_T	Q9Y5Q9_O95848	2_197812774_G_T	rs2376185	0.007335442044394659	1.8202017705478203e-08	1.3122223714803491	4e-06	-0.539665827	145	202	GTF3C3	Q9Y5Q9	ENSG00000119041	NUDT14	O95848	ENSG00000183828	Q9Y5Q9_O95848	0	0	0	73.0	29.0
14_105103972_C_T	14_105103972_C_T	O15304_Q5TCS8	14_105103972_C_T	rs117057128	0.011197216560173254	3.072347326773095e-08	-1.0320283923686209	3.45e-06	-0.848621593	165	148	SIVA1	O15304	ENSG00000184990	AK9	Q5TCS8	ENSG00000155085	O15304_Q5TCS8	0	0	0	119.0	52.0
17_80523375_G_A	17_80523375_G_A	Q9H479_E9PLY5	17_80523375_G_A	rs79680939	0.011197216560173254	3.183496380745445e-08	-1.036972736603499	2.37e-07	-0.787922641	202	202	FN3K	Q9H479	ENSG00000167363	MACF1	E9PLY5	ENSG00000127603	Q9H479_E9PLY5	0	0	0	187.0	48.0
7_156697502_T_C	7_156697502_T_C	Q5C9Z4_Q86VF2-5	7_156697502_T_C	rs141340339	0.011197216560173254	3.321473144259305e-08	-1.0374030551236446	6.55e-06	-0.618781597	141	202	NOM1	Q5C9Z4	ENSG00000146909	IGFN1	Q86VF2-5	ENSG00000163395	Q5C9Z4_Q86VF2	0	0	0	111.0	42.0
22_29775797_C_T	22_29775797_C_T	Q9Y3P4_Q8TCY9-3	22_29775797_C_T	rs78068506	0.011197216560173254	3.432208744231169e-08	-2.308534374532424	3.67e-09	-1.377230847	44	193	RHBDD3	Q9Y3P4	ENSG00000100263	URGCP	Q8TCY9-3	ENSG00000106608	Q9Y3P4_Q8TCY9	0	0	0	34.0	12.0
12_6741816_T_C	12_6741816_T_C	Q8IVL6_Q9P1Q0	12_6741816_T_C	rs4376959	0.011565469436791584	3.7139005233728436e-08	-0.9869578206247576	2.4300000000000003e-08	-1.421569411	193	202	LEPREL2	Q8IVL6	ENSG00000110811	VPS54	Q9P1Q0	ENSG00000143952	Q8IVL6_Q9P1Q0	0	0	0	44.0	15.0
16_70297568_C_T	16_70297568_C_T	Q5RKV6_Q01780	16_70297568_C_T	rs73575193	0.015180750149550415	5.311176410087849e-08	0.4202705150022901	2.49e-06	0.407969519	202	202	EXOSC6	Q5RKV6	ENSG00000223496	EXOSC10	Q01780	ENSG00000171824	Q5RKV6_Q01780	1	1	1	36.0	13.0
6_42928017_C_G	6_42928017_C_G	Q13608_O43933	6_42928017_C_G		0.015180750149550415	5.336862874052426e-08	0.4636225725295288	3.3599999999999996e-20	0.95530889	202	202	PEX6	Q13608	ENSG00000124587	PEX1	O43933	ENSG00000127980	Q13608_O43933	1	1	1	582.0	205.0
1_53695882_T_C	1_53695882_T_C	P23786_Q7Z4H3	1_53695882_T_C	rs13375749	0.015180750149550415	5.539589228574934e-08	-0.35990073175083115	8.099999999999999e-11	-0.677833056	202	202	CPT2	P23786	ENSG00000157184	HDDC2	Q7Z4H3	ENSG00000111906	P23786_Q7Z4H3	0	0	0	10.0	5.0
7_143869221_T_A	7_143869221_T_A	A5YM69_O15173	7_143869221_T_A	rs12703596	0.016867583827270046	6.489763516834305e-08	0.5809204453369907	5.09e-16	-1.236696202	202	164	ARHGEF35	A5YM69	ENSG00000213214	PGRMC2	O15173	ENSG00000164040	A5YM69_O15173	0	0	0
2_11491570_G_A	2_11491570_G_A	O75461_Q8N573-2	2_11491570_G_A	rs62118877	0.016867583827270046	6.64754004525586e-08	-1.6221015114719075	1.5e-05	-0.720599049	52	202	E2F6	O75461	ENSG00000169016	OXR1	Q8N573-2	ENSG00000164830	O75461_Q8N573	0	0	0	80.0	26.0
16_849166_C_A	16_849166_C_A	E7EXA6_Q9BVC3	16_849166_C_A	rs2272900	0.022754403228726846	9.305851491977154e-08	0.4262771659831466	1.82e-19	0.990729742	202	202	CHTF18	E7EXA6	ENSG00000127586	DSCC1	Q9BVC3	ENSG00000136982	E7EXA6_Q9BVC3	0	0	0	93.0	35.0
9_106896809_G_A	9_106896809_G_A	O95347_Q9Y5J3-2	9_106896809_G_A	rs7872034	0.022754403228726846	9.804348024730488e-08	-0.7242423961981561	6.3e-16	0.676971164	62	202	SMC2	O95347	ENSG00000136824	HEY1	Q9Y5J3-2	ENSG00000164683	O95347_Q9Y5J3	0	0	0	300.0	66.0
5_59805730_C_T	5_59805730_C_T	Q8WUY9_Q9NYM9	5_59805730_C_T	rs114487734	0.022754403228726846	9.96393820753889e-08	-1.1003878095672155	5.429999999999999e-07	-0.997541723	198	202	DEPDC1B	Q8WUY9	ENSG00000035499	BET1L	Q9NYM9	ENSG00000177951	Q8WUY9_Q9NYM9	0	0	0	14.0	8.0
6_4963528_A_C	6_4963528_A_C	O75818_P78346-2	6_4963528_A_C		0.022892920833065645	1.0358746883132046e-07	-0.4948799674103543	7.44e-08	-0.480446774	202	202	RPP40	O75818	ENSG00000124787	RPP30	P78346-2	ENSG00000148688	O75818_P78346	1	0	1	26.0	16.0
11_71200139_A_G	11_71200139_A_G	Q6IA69_Q96DX7	11_71200139_A_G	rs7113783	0.031544165208504865	1.504699360064744e-07	1.3835077896995949	1.05e-05	0.720440429	120	202	NADSYN1	Q6IA69	ENSG00000172890	TRIM44	Q96DX7	ENSG00000166326	Q6IA69_Q96DX7	0	0	0	41.0	12.0
12_104387477_A_G	12_104387477_A_G	Q86UY8_Q6ICB4	12_104387477_A_G	rs116993466	0.031544165208504865	1.519418113343679e-07	-1.1756065731597327	6.65e-08	-0.976706244	165	202	NT5DC3	Q86UY8	ENSG00000111696	FAM109B	Q6ICB4	ENSG00000177096	Q86UY8_Q6ICB4	0	0	0	145.0	40.0
16_70297568_C_T	16_70297568_C_T	Q5RKV6_Q96B26	16_70297568_C_T	rs73575193	0.03509185920211274	1.7415246106486418e-07	0.2934742790365246	2.49e-06	0.407969519	202	202	EXOSC6	Q5RKV6	ENSG00000223496	EXOSC8	Q96B26	ENSG00000120699	Q5RKV6_Q96B26	1	0	1	69.0	24.0
14_105103972_C_T	14_105103972_C_T	O15304_Q9H939	14_105103972_C_T	rs117057128	0.036097571559308116	1.844124982394295e-07	-0.993661571400266	3.45e-06	-0.848621593	155	148	SIVA1	O15304	ENSG00000184990	PSTPIP2	Q9H939	ENSG00000152229	O15304_Q9H939	0	0	0	94.0	19.0
16_74783398_A_G	16_74783398_A_G	Q8ND25_Q8TD16-2	16_74783398_A_G	rs4985360	0.03806125282136851	1.9999995644000039e-07	0.4504295380673067	2.75e-05	-0.374539952	202	202	ZNRF1	Q8ND25	ENSG00000186187	BICD2	Q8TD16-2	ENSG00000185963	Q8ND25_Q8TD16	0	0	0	70.0	27.0
17_80523375_G_A	17_80523375_G_A	Q9H479_P18433-4	17_80523375_G_A	rs79680939	0.04130583112356155	2.2307834308225284e-07	-0.7535694943293424	2.37e-07	-0.787922641	202	202	FN3K	Q9H479	ENSG00000167363	PTPRA	P18433-4	ENSG00000132670	Q9H479_P18433	0	0	0	37.0	13.0
12_96428778_G_T	12_96428778_G_T	P09960_Q6ZW33	12_96428778_G_T	rs74457637	0.04187649773367472	2.322727547095697e-07	-1.3277284800366975	1.94e-06	-0.436828159	67	202	LTA4H	P09960	ENSG00000111144	MICALCL	Q6ZW33	ENSG00000133808	P09960_Q6ZW33	0	0	0	183.0	53.0
17_80523375_G_A	17_80523375_G_A	Q9H479_Q96K80	17_80523375_G_A	rs79680939	0.04389558613483282	2.4987901219167284e-07	-0.8039745524910915	2.37e-07	-0.787922641	193	202	FN3K	Q9H479	ENSG00000167363	ZC3H10	Q96K80	ENSG00000135482	Q9H479_Q96K80	0	0	0	85.0	27.0
8_68122084_T_G	8_68122084_T_G	Q9Y6D6_P47895	8_68122084_T_G	rs72654952	0.04837509472415809	2.824399595807057e-07	-1.1562527340535638	2.45e-05	-0.6370445539999999	194	202	ARFGEF1	Q9Y6D6	ENSG00000066777	ALDH1A3	P47895	ENSG00000184254	Q9Y6D6_P47895	0	0	0	64.0	26.0
2_11491570_G_A	2_11491570_G_A	O75461_E5RJY6	2_11491570_G_A	rs62118877	0.049915917558599435	3.0397742406017806e-07	-1.82667214965775	1.5e-05	-0.720599049	41	202	E2F6	O75461	ENSG00000169016	TATDN1	E5RJY6	ENSG00000147687	O75461_E5RJY6	0	0	0	7.0	3.0
14_24920473_T_C	14_24920473_T_C	Q9NRG7-2_I3L3M3	14_24920473_T_C	rs11158711	0.049915917558599435	3.0938428741410183e-07	1.9276093118844329	1.55e-05	0.6307271560000001	43	202	SDR39U1	Q9NRG7-2	ENSG00000100445	TOM1L1	I3L3M3	ENSG00000141198	Q9NRG7_I3L3M3	0	0	0
6_29909988_C_T	6_29909988_C_T	Q5SRN5_P61769	6_29909988_C_T		0.049915917558599435	3.136849219338782e-07	-0.4520541907267634	2.79e-15	-0.727104807	202	176	HLA-A	Q5SRN5	ENSG00000206503	B2M	P61769	ENSG00000166710	Q5SRN5_P61769	0	0	0	110.0	31.0
11_67795299_G_A	11_67795299_G_A	Q13488_F8W0P7	11_67795299_G_A	rs308341	0.049915917558599435	3.205797280580525e-07	0.44167537321303696	3.25e-07	-0.501515697	202	193	TCIRG1	Q13488	ENSG00000110719	ATP5B	F8W0P7	ENSG00000110955	Q13488_F8W0P7	0	0	0	95.0	37.0
6_116782478_G_A	6_116782478_G_A	O15131_O95466-2	6_116782478_G_A		0.05293395970498527	3.4768921312444647e-07	-1.2081655930284452	2.84e-06	-1.190202201	113	87	KPNA5	O15131	ENSG00000196911	FMNL1	O95466-2	ENSG00000184922	O15131_O95466	0	0	0	113.0	29.0
8_68122084_T_G	8_68122084_T_G	Q9Y6D6_O15021-2	8_68122084_T_G	rs72654952	0.07624993644453934	5.119666112027889e-07	-1.3883725052096665	2.45e-05	-0.6370445539999999	142	202	ARFGEF1	Q9Y6D6	ENSG00000066777	MAST4	O15021-2	ENSG00000069020	Q9Y6D6_O15021	0	0	0	102.0	33.0
10_106027059_G_A	10_106027059_G_A	P78417_Q9UHB4	10_106027059_G_A		0.07964805648813313	5.490430579156443e-07	-1.234207544627112	1.32e-14	-1.4049327130000002	195	202	GSTO1	P78417	ENSG00000148834	NDOR1	Q9UHB4	ENSG00000188566	P78417_Q9UHB4	0	0	0	78.0	24.0
11_34967328_A_G	11_34967328_A_G	O00330-3_E9PMW0	11_34967328_A_G	rs11032943	0.07964805648813313	5.580341037088877e-07	-0.7444790130769809	2.13e-08	0.430011982	69	202	PDHX	O00330-3	ENSG00000110435	PSMC3	E9PMW0	ENSG00000165916	O00330_E9PMW0	0	0	0	28.0	11.0
9_106896809_G_A	9_106896809_G_A	O95347_Q9BPX3	9_106896809_G_A	rs7872034	0.08297394809056965	6.1144954179646e-07	0.4022066546296332	6.3e-16	0.676971164	202	202	SMC2	O95347	ENSG00000136824	NCAPG	Q9BPX3	ENSG00000109805	O95347_Q9BPX3	1	0	1	151.0	47.0
3_45511026_C_T	3_45511026_C_T	Q15031_Q86WV5	3_45511026_C_T	rs3774690	0.08297394809056965	6.114776047159035e-07	-0.8536365943763642	2.07e-10	-0.687423047	89	202	LARS2	Q15031	ENSG00000011376	TEN1	Q86WV5	ENSG00000257949	Q15031_Q86WV5	0	0	0
15_52100215_C_T	15_52100215_C_T	Q8WXD2_Q9BXS4	15_52100215_C_T	rs11631530	0.08297394809056965	6.193056034409129e-07	-0.8000704630624185	1.56e-05	-0.914822726	189	162	SCG3	Q8WXD2	ENSG00000104112	TMEM59	Q9BXS4	ENSG00000116209	Q8WXD2_Q9BXS4	0	0	0	27.0	13.0
5_59805730_C_T	5_59805730_C_T	Q8WUY9_Q9BWU1	5_59805730_C_T	rs114487734	0.08297394809056965	6.297808052295841e-07	-1.8190394989789624	5.429999999999999e-07	-0.997541723	78	202	DEPDC1B	Q8WUY9	ENSG00000035499	CDK19	Q9BWU1	ENSG00000155111	Q8WUY9_Q9BWU1	0	0	0	86.0	26.0
16_616701_G_A	16_616701_G_A	Q96S19_P56715	16_616701_G_A	rs62030865	0.08780073852857556	6.906165042066677e-07	-0.5827452882006423	9.34e-06	0.374121901	156	202	C16orf13	Q96S19	ENSG00000130731	RP1	P56715	ENSG00000104237	Q96S19_P56715	0	0	0	88.0	38.0
2_97837911_C_T	2_97837911_C_T	Q6P2I3_J3KRZ5	2_97837911_C_T	rs2924021	0.08780073852857556	6.920480506854053e-07	0.7127190402368097	4.95e-07	0.654820553	104	119	FAHD2B	Q6P2I3	ENSG00000144199	SHMT1	J3KRZ5	ENSG00000176974	Q6P2I3_J3KRZ5	0	0	0	17.0	8.0
17_80681175_A_G	17_80681175_A_G	Q9BTW9_P47870	17_80681175_A_G	rs2246558	0.08840293249509176	7.096981645569412e-07	1.182895050081346	3.74e-09	-0.5953832729999999	76	202	TBCD	Q9BTW9	ENSG00000141556	GABRB2	P47870	ENSG00000145864	Q9BTW9_P47870	0	0	0	207.0	65.0
2_38894528_G_A	2_38894528_G_A	Q96C23_O75969	2_38894528_G_A	rs7574493	0.08862540012624265	7.479387276340105e-07	-0.910503844306203	0.000116753	0.368753904	125	202	GALM	Q96C23	ENSG00000143891	AKAP3	O75969	ENSG00000111254	Q96C23_O75969	0	0	0	66.0	20.0
1_200813145_G_A	1_200813145_G_A	Q15058_Q9UBS9	1_200813145_G_A	rs188707771	0.08862540012624265	7.589927717939314e-07	0.06942520773895011	1.7e-06	0.8823201559999999	194	202	KIF14	Q15058	ENSG00000118193	SUCO	Q9UBS9	ENSG00000094975	Q15058_Q9UBS9	0	0	0	463.0	139.0
1_200813145_G_A	1_200813145_G_A	Q15058_Q9UBS9-2	1_200813145_G_A	rs188707771	0.08862540012624265	7.589927717939314e-07	-1.8148812355831927	1.7e-06	0.8823201559999999	43	202	KIF14	Q15058	ENSG00000118193	SUCO	Q9UBS9-2	ENSG00000094975	Q15058_Q9UBS9	0	0	0	351.0	107.0
19_45879195_T_G	19_45879195_T_G	Q96L34_Q8TC92	19_45879195_T_G	rs76265504	0.08862540012624265	7.960669919584942e-07	-0.8413393642084763	5.44e-08	-1.19612253	142	149	MARK4	Q96L34	ENSG00000007047	ENOX1	Q8TC92	ENSG00000120658	Q96L34_Q8TC92	0	0	0	45.0	15.0
4_99916387_T_A	4_99916387_T_A	P53582_Q9H2D6	4_99916387_T_A	rs6850128	0.08862540012624265	8.020366592960506e-07	-0.0533588468762185	1.14e-05	-0.462961317	88	202	METAP1	P53582	ENSG00000164024	TRIOBP	Q9H2D6	ENSG00000100106	P53582_Q9H2D6	0	0	0	146.0	48.0
4_99916387_T_A	4_99916387_T_A	P53582_Q9H2D6-2	4_99916387_T_A	rs6850128	0.08862540012624265	8.020366592960506e-07	-0.06720773087875187	1.14e-05	-0.462961317	202	202	METAP1	P53582	ENSG00000164024	TRIOBP	Q9H2D6-2	ENSG00000100106	P53582_Q9H2D6	0	0	0	132.0	41.0
4_99916387_T_A	4_99916387_T_A	P53582_Q9H2D6-5	4_99916387_T_A	rs6850128	0.08862540012624265	8.020366592960506e-07	0.6928459831726221	1.14e-05	-0.462961317	53	202	METAP1	P53582	ENSG00000164024	TRIOBP	Q9H2D6-5	ENSG00000100106	P53582_Q9H2D6	0	0	0	174.0	45.0
6_49342503_A_G	6_49342503_A_G	P22033_Q49A17-2	6_49342503_A_G		0.0952956512196805	8.763103731513352e-07	-1.139908208709099	3.76e-07	-0.518344884	55	202	MUT	P22033	ENSG00000146085	GALNTL6	Q49A17-2	ENSG00000174473	P22033_Q49A17	0	0	0	27.0	11.0
19_7180804_T_C	19_7180804_T_C	Q8N988-2_Q9UM47	19_7180804_T_C	rs7246290	0.09562881153050558	8.938281142402891e-07	-1.0324938946219877	2.48e-06	1.190768463	202	139	ZNF557	Q8N988-2	ENSG00000130544	NOTCH3	Q9UM47	ENSG00000074181	Q8N988_Q9UM47	0	0	1	69.0	18.0
2_11491570_G_A	2_11491570_G_A	O75461_Q8IWZ6	2_11491570_G_A	rs62118877	0.09562881153050558	9.072906513845095e-07	-1.0046574988946513	1.5e-05	-0.720599049	166	202	E2F6	O75461	ENSG00000169016	BBS7	Q8IWZ6	ENSG00000138686	O75461_Q8IWZ6	0	0	0	132.0	38.0
19_33208155_C_T	19_33208155_C_T	A8MXV4_Q96KP6	19_33208155_C_T	rs1976501	0.09601100004400899	9.249308173657163e-07	-0.8107526449779687	2.32e-07	-0.647074391	34	133	NUDT19	A8MXV4	ENSG00000213965	TNIP3	Q96KP6	ENSG00000050730	A8MXV4_Q96KP6	0	0	0	115.0	27.0
3_38350543_A_G	3_38350543_A_G	O95747_A0A087WZ65	3_38350543_A_G	rs818817	0.09980067499154288	9.886744240981624e-07	0.618067508465022	2.48e-07	-0.541210716	130	202	OXSR1	O95747	ENSG00000172939	ANK3	A0A087WZ65	ENSG00000151150	O95747_A0A087WZ65	0	0	0	83.0	23.0
16_72256903_T_C	16_72256903_T_C	Q92620_Q96CB9	16_72256903_T_C	rs12934528	0.09980067499154288	9.907216467178683e-07	0.39846291928449895	3.99e-06	0.609729533	202	202	DHX38	Q92620	ENSG00000140829	NSUN4	Q96CB9	ENSG00000117481	Q92620_Q96CB9	0	0	1	120.0	31.0
9_95859739_T_C	9_95859739_T_C	Q96LW7-2_X6R7D6	9_95859739_T_C	rs4077822	0.09980067499154288	1.0051407729697253e-06	0.6597378268840357	1.07e-07	0.5127491820000001	60	202	C9orf89	Q96LW7-2	ENSG00000165233	SORCS1	X6R7D6	ENSG00000108018	Q96LW7_X6R7D6	0	0	0	15.0	6.0
